# Supplementary material
Source: Hindawi journal article supplement (doi:10.1155/2011/756905)
Supplement: f1 [file 756905.f1.pdf]

>gi|9627100|ref|NC\_001526.1|\_HumanPapillomavirus\_-16,\_complete\_genome

ACTACAATAATTCATGTATAAACTAAGGGCGTAACCGAAATCGGTTGAACCGAAACCGG  
TTAGTATAAAAGCAGACATTTTATGCACCAAAAGAGAACTGCAATGTTTCAGGACCCACA  
GGAGCGACCCAGAAAGTTACCACAGTTATGCACAGAGCTGCAAACAACCTATACATGATAT  
AATATTAGAATGTGTGTACTGCAAGCAACAGTTACTGCGACGTGAGGTATATGACTTTGC  
TTTTTCGGGATTTATGCATAGTATATAGAGATGGGAATCCATATGCTGTATGTGATAAATG  
TTTAAAGTTTATTCATAAAATTAGTGAGTATAGACATTATTGTTATAGTTTGTATGGAAC  
AACATTAGAACAGCAATACAACAAACCGTTGTGTGATTTGTTAATTAGGTGTATTAACCTG  
TCAAAAGCCACTGTGTCTCTGAAGAAAAGCAAAGACATCTGGACAAAAAGCAAAGATTCCA  
TAATATAAGGGGTGCGTGACCGGTGCGATGTATGTCTTGTTCAGATCATCAAGAACACG  
TAGAGAAAACCCAGCTGTAATCATGCATGGAGATACACCTACATTGCATGAATATATGTTA  
GATTTGCAACCAGAGACAACCTGATCTCTACTGTTATGAGCAATTAAATGACAGCTCAGAG  
GAGGAGGATGAAATAGATGGTCCAGCTGGACAAGCAGAACCGGACAGAGCCCATTAACAT  
ATTGTAACCTTTTGTGCAAGTGTGACTCTACGCTTCGGTTGTGCGTACAAAGCACACAC  
GTAGACATTCGTACTTTGGAAGACCTGTTAATGGGCACACTAGGAATTGTGTGCCCCATC  
TGTTCTCAGAAACCATAATCTACCATGGCTGATCCTGCAGGTACCAATGGGGAAGAGGGT  
ACGGGATGTAATGGATGGTTTTATGTAGAGGCTGTAGTGGAAAAAAAACAGGGGATGCT  
ATATCAGATGACGAGAACGAAAATGACAGTGATACAGGTGAAGATTTGGTAGATTTTATA  
GTAAATGATAATGATTATTTAACACAGGCAGAAACAGAGACAGCACATGCGTTGTTTACT  
GCACAGGAAGCAAAACAACATAGAGATGCAGTACAGGTTCTAAAACGAAAGTATTTGGTA  
GTCCACTTAGTGATATTAGTGGATGTGTGATGACAATAATATTAGTCTAGATTAAAAGCTA  
TATGTATAGAAAAACAAAGTAGAGCTGCAAAAAGGAGATTATTTGAAAGCGAAGACAGCG  
GGTATGGCAATACTGAAGTGGAAACTCAGCAGATGTTACAGGTAGAAGGGCGCCATGAGA  
CTGAAACACCATGTAGTCAGTATAGTGGTGGAAGTGGGGGTGGTTGCAGTCAGTACAGTA  
GTGGAAGTGGGGGAGAGGGTGTAGTGAAAAGACACACTATATGCCAAACACCCTTACAA  
ATATTTTAAATGTACTAAAACTAGTAATGCAAAGGCAGCAATGTTAGCAAAATTTAAAG  
AGTTATACGGGGTGAGTTTTTTTCAGAAATAGTAAGACCATTTAAAAGTAATAAATCAACGT  
GTTGCGATTGGTGTATTGCTGCATTTGGACTTACACCCAGTATAGCTGACAGTATAAAAA  
CACTATTACAACAATATTGTTTATATTTACACATTCAAAGTTTAGCATGTTTCATGGGGAA  
TGGTTGTGTTACTATTAGTAAGATATAAATGTGGAAAAAATAGAGAAACAATTGAAAAAT  
TGCTGTCTAACTATTATGTGTGTCTCCAATGTGTATGATGATAGAGCCTCCAAAATTGC  
GTAGTACAGCAGCAGCATTATATTGGTATAAAACAGGTATATCAAATATTAGTGAAGTGT  
ATGGAGACACGCCAGAATGGATACAAAGACAAACAGTATTACAACATAGTTTAAATGATT  
GTACATTTGAATTATCACAGATGGTACAATGGGCCTACGATAATGACATAGTAGACGATA  
GTGAAATTGCATATAAATATGCACAATTGGCAGACACTAATAGTAATGCAAGTGCCTTTC  
TAAAAAGTAATTCACAGGCAAAAATTGTAAAGGATTGTGCAACAATGTGTAGACATTATA  
AACGAGCAGAAAAAAAACAATGAGTATGAGTCAATGGATAAAAATATAGATGTGATAGGG  
TAGATGATGGAGGTGATTGGAAGCAAATTGTTATGTTTTTAAGGTATCAAGGTGTAGAGT  
TTATGTCAATTTTTTAACCTGCATTAAAAAAGATTTTTCGAAGGCATACCTAAAAAAAATTGCA  
TATTACTATATGGTGCAGCTAACACAGGTAAATCATTATTTGGTATGAGTTTAATGAAAT  
TTCTGCAAGGGTCTGTAATATGTTTTGTAAATTCTAAAAGCCATTTTTGGTTACAACCAT  
TAGCAGATGCCAAAATAGGTATGTTAGATGATGCTACAGTGCCCTGTTGGAACCTACATAG  
ATGACAATTTAAGAAATGCATTGGATGGAAATTTAGTTTCTATGGATGTAAAGCATAGAC  
CATTGGTACAACCTAAAATGCCCTCCATTATTAATTACATCTAACATTAATGCTGGTACAG  
ATTCTAGGTGGCCTTATTTACATAATAGATTGGTGGTGTTCATTTCTAATGAGTTTC  
CATTTGACGAAAACGGAAATCCAGTGTATGAGCTTAATGATAAGAACTGGAAATCCTTTT  
TCTCAAGGACGTGGTCCAGATTAAAGTTTGCACGAGGACGAGGACAAGGAAAACGATGGAG  
ACTCTTTGCCAACGTTTAAATGTGTGTGTCAGGACAAAATACTAACACATTATGAAAATGAT  
AGTACAGACCTACGTGAAATATAGACTATTGGAAACACATGCGCCTAGAATGTGCTATT  
TATTACAAGGCCAGAGAAATGGGATTTAAACATATTAACCACCAAGTGGTGCCAACACTG  
GCTGTATCAAGAATAAAGCATTACAAGCAATTGAACTGCAACTAACGTTAGAAACAATA  
TATAACTCACAATATAGTAATGAAAAGTGGACATTACAAGACGTTAGCCTTGAAGTGTAT  
TTAACTGCACCAACAGGATGTATAAAAAACATGGATATACAGTGGAAAGTGCAGTTTGAT  
GGAGACATATGCAATACAATGCATTATACAACTGGACACATATATATATTTGTGAAGAA  
GCATCAGTAACTGTGGTAGAGGGTCAAGTTGACTATTATGGTTTATATTATGTTTCATGAA

GGAATACGAACATATTTTGTGCAGTTTAAAGATGATGCAGAAAAATATAGTAAAAATAAA  
GTATGGGAAGTTCATGCGGGTGGTCAGGTAATATTATGTCCTACATCTGTGTTTAGCAGC  
AACGAAGTATCCTCTCCTGAAATTATTAGGCAGCACTTGGCCAACCAACCCCGCCGCGACC  
CATACCAAAGCCGTCGCTTGGGCACCGAAGAAACACAGACGACTATCCAGCGACCAAGA  
TCAGAGCCAGACACCGGAAACCCCTGCCACACCCTAAGTTGTTGCACAGAGACTCAGTG  
GACAGTGCTCCAATCCTCACTGCATTTAACAGCTCACACAAAGGACGGATTAACGTGAAT  
AGTAACACTACACCCATAGTACATTTAAAAGGTGATGCTAATACTTTAAAATGTTTAAGA  
TATAGATTTAAAAGCATTGTACATTGTATACTGCAGTGTCTGCTACATGGCATTGGACA  
GGACATAATGTAAAACATAAAAGTGCAATTGTTACACTTACATATGATAGTGAATGGCAA  
CGTGACCAATTTTGTCTCAAGTTAAAATACCAAAACTATTACAGTGTCTACTGGATTT  
ATGTCTATATGACAAATCTTGATACTGCATCCACAACATTACTGGCGTGCTTTTGTCTTT  
GCTTTGTGTGCTTTTGTGTGTCTGCCTATTAATACGTCCGCTGCTTTTGTCTGTGTCTAC  
ATACACATCATTAATAATATTGGTATTACTATTGTGGATAACAGCAGCCTCTGCGTTTAG  
GTGTTTTATTGTATATATTATTTGTTTATATACCATTATTTTAAATACATACACATGC  
ACGCTTTTAAATTACATAATGTATATGTACATAATGTAATTGTTACATATAATTGTTGTA  
TACCATAACTTACTATTTTTCTTTTTTATTTTCATATATAATTTTTTTTTTGTGTTGTT  
TGTTTGTTTTTAAATAAACTGTTATTACTTAACAATGCGACACAAACGTTCTGCAAAACG  
CACAAACGTCATCGGCTACCCAACCTTTATAAAACATGCAAAACAGGCAGGTACATGTCC  
ACCTGACATTATACCTAAGGTTGAAGGCAAAACTATTGCTGAACAAATATTACAATATGG  
AAGTATGGGTGATTTTTTGGTGGGTTAGGAAATTGGAACAGGGTTCGGGTACAGGCGGACG  
CACTGGGTATATTCCATTGGGAACAAGGCTCCACAGCTACAGATACACTTGCTCCTGT  
AAGACCCCTTTAACAGTAGATCCTGTGGGCCCTTCTGATCCTTCTATAGTTTCTTTAGT  
GGAAGAAACTAGTTTTATTGATGCTGGTGCACCAACATCTGTACCTTCCATTCCCCAGA  
TGTATCAGGATTTAGTATTACTACTTCAACTGATACCACACCTGCTATATTAGATATTAA  
TAATACTGTTACTACTGTTACTACACATAATAATCCCACTTTCACTGACCCATCTGTATT  
GCAGCCTCCAACACCTGCAGAACTGGAGGGCATTTTACACTTTCATCATCCACTATTAG  
TACACATAATTATGAAGAAATTCCTATGGATACATTTATTGTTAGCACAAACCTAACAC  
AGTAACTAGTAGCACACCCATACCAGGGTCTCGCCAGTGGCACGCTAGGATTATATAG  
TCGCACAACACAACAGGTTAAAGTTGTAGACCCTGCTTTTGTAACTCCCACTAACT  
TATTACATATGATAATCCTGCATATGAAGGTATAGATGTGGATAATACATTATATTTTC  
TAGTAATGATAATAGTATTAATATAGCTCCAGATCCTGACTTTTTGGATATAGTTGCTTT  
ACATAGGCCAGCATTAACCTCTAGGCGTACTGGCATTAGGTACAGTAGAATTGGTAATAA  
ACAAACACTACGTACTCGTAGTGGAAAATCTATAGGTGCTAAGGTACATTATTATTATGA  
TTTAAGTACTATTGATCCTGCAGAAGAAATAGAATTACAACTATAACACCTTCTACATA  
TACTACCACTTCACATGCAGCCTCACCTACTTCTATTAATAATGGATTATATGATATTTA  
TGCAGATGACTTTATTACAGATACTTCTACAACCCCGGTACCATCTGTACCCTCTACATC  
TTTATCAGGTTATATTCCTGCAATACAACAATTCCTTTTGGTGGTGCATACAATATTCC  
TTTAGTATCAGGTCCTGATATACCCATTAATATAACTGACCAAGCTCCTTCATTAATTCC  
TATAGTTCCAGGGTCTCCACAATATACAATTATTGCTGATGCAGGTGACTTTTATTTACA  
TCCTAGTTATTACATGTTACGAAAACGACGTAAACGTTTACCATATTTTTTTTCAGATGT  
CTCTTTGGCTGCCCTAGTGAGGCCACTGTCTACTTGCCTCCTGTCCAGTATCTAAGGTTG  
TAAGCACGGATGAATATGTTGCACGCACAAACATATATTATCATGCAGGAACATCCAGAC  
TACTTGCAGTTGGACATCCCTATTTTCCATTAATAAAACCTAACAATAACAAAATATTAG  
TTCCTAAAGTATCAGGATTACAATACAGGGTATTTAGAAATACATTTACCTGACCCCAATA  
AGTTTGGTTTTCCTGACACCTCATTTTATAATCCAGATACACAGCGGCTGGTTTGGGCCT  
GTGTAGGTGTTGAGGTAGGTCGTGGTCAGCCATTAGGTGTGGGCATTAGTGCCATCCTT  
TATTAAATAAATTGGATGACACAGAAAATGCTAGTGCTTATGCAGCAAAATGCAGGTGTGG  
ATAATAGAGAATGTATATCTATGGATTACAAACAAACACAATTGTGTTTAAATTGGTTGCA  
AACCACCTATAGGGGAACACTGGGGCAAAAGGATCCCCATGTACCAATGTTGCAGTAAATC  
CAGGTGATTGTCCACCATTAGAGTTAATAAACACAGTTATTACAGGATGGTGATATGGTTC  
ATACTGGCTTTGGTGCTATGGACTTTACTACATTACAGGCTAACAAAAGTGAAGTTCCAC  
TGGATATTTGTACATCTATTTGCAATATCCAGATTATATTAATAATGGTGTCAGAACCAT  
ATGGCGACAGCTTATTTTTTTTATTTACGAAGGGAACAAATGTTTGTAGACATTTATTTA  
ATAGGGCTGGTACTGTTGGTGAAAATGTACCAGACGATTTATACATTAAAGGCTCTGGGT  
CTACTGCAAAATTTAGCCAGTTCAAATTATTTTCTACACCTAGTGGTTCTATGGTTACCT

CTGATGCCCAAATATTCAATAAACCTTATTGGTTACAACGAGCACAGGGCCACAATAATG  
GCATTTGTTGGGGTAACCAACTATTTGTTACTGTTGTTGATACTACACGCAGTACAAATA  
TGTCATTATGTGCTGCCATATCTACTTCAGAACTACATATAAAAAATACTAATTTAAGG  
AGTACCTACGACATGGGGAGGAATATGATTTACAGTTTATTTTTCAACTGTGCAAAATAA  
CCTTAAGTGCAGACGTTATGACATACATACATTCTATGAATTCCACTATTTTGGAGGACT  
GGAATTTTGGTCTACAACCTCCCCAGGAGGCACACTAGAAGATACTTATAGGTTTGTAA  
CCCAGGCAATTGCTTGTCAAAAACATACACCTCCAGCACCTAAAGAAGATGATCCCCCTTA  
AAAAATACACTTTTTTGGGAAGTAAATTTAAAGGAAAAGTTTTCTGCAGACCTAGATCAGT  
TTCCTTTAGGACGCAAATTTTTACTACAAGCAGGATTGAAGGCCAAACCAAAATTTACAT  
TAGGAAAACGAAAAGCTACACCCACCACCTCATCTACCTCTACAACCTGCTAAACGCAAAA  
AACGTAAGCTGTAAGTATTGTATGTATGTTGAATTAGTGTGTTTGTGTGTATATGTTT  
GTATGTGCTTGTATGTGCTTGTAAATATTAAGTTGTATGTGTGTTTGTATGTATGGTATA  
ATAAACACGTGTGTATGTGTTTTTAAATGCTTGTGTAACCTATTGTGTGTCATGCAACATAAA  
TAACTTATTGTTTCAACACCTACTAATTGTGTTGTGGTTATTCATTGTATATAAACTAT  
ATTTGCTACATCCGTGTTTTTGTGTTTTATATATACTATATTTTGTAGCGCCAGGCCATTTT  
GTAGCTTCAACCGAATTCGGTTGCATGCTTTTTGGCACAAAATGTGTTTTTTTAAATAGT  
TCTATGTCAGCAACTATGGTTTTAACTTGTACGTTTCCCTGCTTGCCATGCGTGCCAAATC  
CCTGTTTTTCCCTGACCTGCACTGCTTGCCAACCATTCATTGTTTTTTTAACTGCATATG  
TGCAACTACTGAATCATACTATGTACATTGTGTGCATATAAAATAAATCACTATGCGCCAACG  
CCTTACATACCGCTGTTAGGCACATATTTTGGCTTGTGTTTTAACTAACCTAATTGCATAT  
TTGGCATAAAGGTTTTAACTTCTAAGGCCAACTAAATGTACCCTAGTTCATACATGAACCT  
GTGTAAAGGTTAGTCATACATTGTTTCATTGTGTAAGTGCACATGGGTGTGTGCAACCG  
ATTTTGGGTTACACATTTACAAGCAACTTATATAATAATACTAA

>gi|12084981|ref|NC\_002644.1|\_Human\_papillomavirus\_type\_71,\_complete\_genome

TTGTTCTACTTCTTACTCATTATTATAAAATTATAATGTTTGTATAAGAAATATAGGTGTA  
ACCGAAAACGGTGTAACCGAAATGGGTGCATATATAAAGCAATGCTTGGTTCAGCAGATT  
TAGCTATGTCCAGCGGGGACGCATACCCACCAACCTCTTCAGACTGTGTAACCAGTACG  
ACGTGGACCTGCAGGACCTGAACCTAACCTGCATATTCTGCAGAACAATTAACAGACGTG  
GAAGTCGTGGCCTTGCATATAAGGAGCTGAAAGTTGTGTGGAGAAGTGGTTTTCCGTTTG  
CTGCATGTGCCTGCTGTTTGGAAATAGCTGGAAAACCTAAGGCAACTTAGATATTGGCAAT  
TTTCAGGCTTTGCAAACACAGTGGAATTAGACACCGGAACGCCAGTTACAGAGCAACTAA  
TACGGTGCTACGTGTGTCACAAGCCATTGTGTAGTGTGGAAGAAAGAAATAATTACAG  
AAGGCAGGCGATTTTATAAAATAGCAGGCCATTGGCGCGGTGCTTGCCTACAGTGTGGA  
AACCATGCGAGGCCAACAATGTACCTTAAAGACATTGTCTGTCAGCTACAGCCAGAGGTT  
GTTGACCTGTATTGTACAGCAATTTGCCAGCTCAGACGAGGAAGATAATAGGGTGGAC  
GGTGAGCAACCCACAGAACCAGCACAGCAGGCATATAGGGTGGTTTTCTACTGTGGTAGG  
TGCTGTGCTGCAGTTAGGCTTGTGGTGGAAAGCGACGAAGCAGACATAAGAGCGCTTCAA  
CAGCTGTTACTGGGCACACTGACAATAGTGTGTCCCATCTGCGTGTAGCTGCCATGGCCG  
ACTGTGAAGGTACAGGTACTGATGATGATGGGGGCGAAGCGGGAACAGGCGCGGGAGGGT  
GGTTTTTTGTAGAAGCTATTGTGGACAGATGTACCGGCCACAGCCATCCAGTGATGAGG  
ATGAGGATGACAAATGATACTGGGGAAGATATGGTGGATTTTATAAATGACAGGCATGCAG  
GGGACGGACAGGAAGTGGCAGCAGAGGTGTACAGACAGCAAGAAGCATTAGATGACGAGG  
CAATTGTGCAGCCCCATAAACGAAAGTTCTTGCAAGTCCTTTGTCTGCAGGGGTGTGTG  
TAGACAAAGAGTTAAGCCGCGGCTAGATGCTATATCCATAGGCAGGGAATCCCAAAAAG  
CAAAACGAAGGTTATTTGAACTACAGGACAGTGGGTATGGCAATACGCAAGTGGATACTG  
AAGCGGCAGGAAACCAGGTACCAAGGGACGGGACGCCAGGGGGGCTGCACACAGAACAGG  
AGGAGGAGCGTCAGGGGGGGGATGGGGCGGCAGGCATAGACAGTACACCAGCACACACAG  
GAACAAATACAGTGTGGCTTTGTTAACTCCAGTAATCGAAGGGCAACACTGCTAGGTA  
AGTTTAAAGACTTATATGGGTTATCATATATGGAATTGGTACGGCAATTTAAAAGTAATA  
AAATCAACATGTTTGGACTGGGTAGTATGTGCGTTTGGTGTGTATTGCACGGTTGCGGAGG  
GTGTAAAAACCTTGATACAGCAACACTGTGAATACGCACACATACAACAACAAACATGTT  
CCTGGGGAGTGGTTATATTAATGCTGTTGCGATATAAGTGTGCTAAAAACAGAGATACCG  
TGGCAAAGGGATTAAAGCATGTTATTAATATACCAGAAACAAACATGCTAATAGAACCAC  
CAAAAATAAGAAGTACGCCTGCTGCATTATATTGGTTTAGGGCGAGCATGGGAAACGCAA  
GTGACATATTCGGGGAAACGCCAGAATGGATAGTTAGACAACTGTGGTAGGACACAGCA

TGGAGGAATGCCAGTTTCAGTTATCAGTAATGGTGCAATGGGCATATGACCATGATATAA  
CAGATGAAAGTATATTGGCATATGAATATGCCCCGTCTGGCTGATGTAGATAGTAATGCAG  
CAGCCTTTTGTAGCAAGCAATTGTCAAGCCAAATATGTGAAAGATGCATGCACAATGTGTA  
GACATTATAAACGAGCAGAGCAGGCACAAATGTCTATGTCACAATGGATATCATTTAGAA  
GTGCTAAAATAACAGAAGAAGGGGATTGGCGAACAATAGTAAAATATTTAAGACACCAGG  
ATATAGAATTTATTACATTTATTATAGCATTAATAAATTTTTTAAAGGGTATACCAAAGA  
AAAGCTGTTTAGTATTTTATGGGCCTGCAGACACTGGCAAATCCTATTTTGCATGAGCC  
TATTACGGTTTTTGGGTGGGGTTGTTCATTTCCCTATGCCAATTCCAGCAGCCATTTTTGGT  
TGCAGCCGTTAGCTGATGCAAAATTAGGACTAATAGATGATGTAACCCCTAATTGCTGGA  
GCTATATAGATGTATATCTAAGAAATGCATTAGACGGTAATCAAATATGTATAGATAGAA  
AACACAGGCCATTACTGCAGTTAAAGTGTCCCCATTGTTAATAACAACAAATACCAATC  
CGTTAGAGGAGGAACGATGGAAGTTTTTACGTAGTAGACTGCAGCTGTTTACATTTAAAA  
ATGCATTTCCTTTAAATTCAAAAGGGGACCCCTATGTATCCACTAAATGATGCAAACTGGA  
AATGCTTTTTTCAAAGGTTGTGGGCTCGGTTAGACTTACACGAGCAGGACGAGCAGGAGG  
ACAATGGAGACACTGGCCAGCCGTTTAGATGCGTGCCAGGAGACGTTACTAGAACTGTAT  
GAAAAAGATAGTGACCAGCTACAGGACCAAATTAACACTGGCAACACGTGCGATGGGAA  
AATGTGTTGTTATTTAAGGCAAGGGAAGCAGGAATTACTCATCTTGCCCACCAGGTGGTG  
CCTGTGCTTGGTATTGCTAAAGCCAAAGCTTGTAAGCAATTGAAATTCAGTTGGCATT  
AAGACATTACTTAACAGTCCCTATAGCAACGAACGATGGACATTGCGTGACACGAGCCAG  
GAAATGTGGGACGCGAGTGCCTAAGCAATGCTGGAAAAAAAAGGCTACACTGTAGAAGTG  
CGATACGATTGCAAAGAGGAAAAAGACAATGTGTTACACATGTTGGAGGGAAATATATGTG  
CAAAACAGTACAAATGAGACATGGGAAAAAGTGTGTGGCCTGGTGGACCATGCGGGCATA  
TACTATTTACACGATGGGATACGTGTAGACTGTGTATTATTCTCCAAGGAAGCAGTAATA  
TATGGGGACACAGGCATCTGGGAAGTACATGTGGGTTCAAGGGTGATTTATGATGCATTC  
GACTCCTCTGTGTCTAGCACCCAGGACACCCGAGCAAGACCAAGTACCCACTATTAAACCT  
ACTGACCACGGACCCGACTCGCACCCCCAACAGGCCTCCACCACCACCCAAAGTGTGGGC  
ACCAACGAAAACCAAGTGTGACCCCCGCCATTTAAGCGACAGCGACTCGGAGACAGACAG  
CGGACCCCTGAGCAGCCCGATTCTACAAAAGCACCACAGCAGCTGGCACGTGTCAACCTT  
AGGACCCAGTGTGACACTGACGGCGCACACGAGCACGGGAGGACACGTGACTGTAACAGT  
GCACCTGTAATACACCTTAGAGGTGAAGCCAATAAACTAAAGTGTTTAAGGTATAGGTTG  
CAAAAACATAAATCTGTACTGTTTGCCAAAGCATCCTCCACGTGGCATTGGGCCACTGGC  
ACAGAGGACAATAACATGTAACAAACATTTGTAACATTGTGGCATGATAGTGTGGAACAG  
CGGGCACAATTTCTAGCCACTGTACATATTCCTAAGGGCATAGAGGCCTTACCAGGATAT  
ATGTCATTGTTTGCATAATCTTTGTAAATATTGTATATATTGTATCTATTGTATAGACGC  
GGAACGTTAAGGGTACACACCTACCTGTAGTGCTGGAGCCCTTTCTATGCTGGGTGTCTG  
CATGGACCTATGCCTACTACTACTAATTAGCTTTTGGCTGTCTATTTTATCTTCTCTTA  
CTGCCTTTTTTAATTTTTTTTTGTTACTGTGTTTCTTGGGTTTCTAGCACTATATATACAGG  
CAGCAGCGTCCCTTACCTAACTGTGACTTGTGACTACCACACAACCAGCCAATACTGCTA  
CTACGTGTACATAACCTATCCATTTGTGTTATAGATTGCATATATGTATCCTGTTGTGGT  
AAAGGATTCCCAAGGCGGACATTATGATATTGTGGTGTGGGGCCCTGATGATGTAGATGT  
ATTGTTTGTGTTTTTAGTGTTGGTGTGTCTTATGTTGCTTCTGTTTTTGTACGGTTGAT  
GCAGTAGGTACCCCCCTTTTGTATTGCCCTGTTTATACATATACATATACATATTGTTT  
TTATTTGGTTTTTGTTTTTTGTTTTTTGTGTGTGCCTGTGTGTGTAAATAAACACATTTA  
CAATGCCACGTGCACGGCGTCGCAACGTGCTTCAGTTACACAGCTATATCAGTCCTGTA  
AGCTAACAGGCACATGTCCCCCTGATGTTATTAATAAGGTGGAGCACAATACCTTGGCTG  
ATAAAATATTACGCTGGGGTAGTTTAGGAATATTTTTGGGAGGTTTGGGCATTGGCACAG  
GGTCTGGCACCGGTGGGCGCACAGGCTATATCCCATTTGGTACACGTCCCTCCTACTGTTG  
TGGATGTAGGACCTCCTGCACGCCCCCTGTGGTTATAGAAACAGTAGGGGCCCTCTGATC  
CATCTATTGTGTCTTTGGTAGGAGATTCTAGTATTATAGAAGCAGGAGCACCATATCCTA  
ACTTTACTGGCACAGGTGGGTTTGAGGTCACTACAGCATCCACTACTCCTGCTGTGT  
TAGACATTACTCCAGGTAACACTGTGCAGGTAGTAGCAGTAGTTTTACTAACCCATCCT  
TTACTGAACCTGCCTTAGTGGAGCCCCCTCAAACAGGTGAGGTTTCGGGACATATTTTGG  
TTAGTACCTCTACATCTGGCACCCATGGCTATGAGGAAATACCCATGCAACATTTGCGT  
CGGAGGGAACAGGCAATGAACCTATAAGTAGTACACCTATTCCTGGGGTACGCAGGTTAG  
CAGGCCCTCGCCTGTATAGTAGGGCTATCAGCAGGTGCGGGTGGATGAATCCACATTTT

TTCGCCACCCTGCATCTATGGTTACATATGACAACCCTGTGTATGACCCAGAGGAACTA  
TAATATTTGAACATCCTAGCATACACCAGGCTCCTGATCCAGCATTTATGGATATTGTGG  
CCTTGACAGGCCGCGCCCTTACTGCCCCGTAAAGGTACGGTACGTTTCAGTCGTTTAGGAC  
AAAAATCTACCCCTTCGCACCCGTAGTGGTAAACAAATAGGGGCGCGGGTACATTTTTATC  
ATGACATTAGCCCTATACAACCCACCGAACACTTAGAACTGCAGCCACTAGGGCGGGCCT  
TACAACAAGAACCATTATGACACATTATATGACATATATCTGACACAGATTATTCGAATGA  
TACTGTCATTCAACCTACTTCTGTGTCCAGCAGGCCTACACCTACTACTATACCCCTCTG  
TAACTGCCACATCAGCCGTGTCTGCCTCTCGCACACAAAATGTTACAGCACCTTTGTCTG  
CAGGAGCAGATGTTCCAGTGTTTGATGGCCCTGACATTGATTTTTTCCACCTCCCATGCCA  
CTACTCCTACTCCTGTAGTGCCGTCCATTGCACCTCCCAGTTCTTTTATTGTGTATGGAA  
CTGAGGTATTATTTAATGCCTAGTTATATATTTTTTCTAAAAAACTAAACGTGTCCACT  
ATTTTTTTGCAGATGGCTTTGTGGCGGCCTAGTGACAGCAAGGTATACCTGCCTCCTGCC  
CCCCGTATCCAAGTTCTCAGCACCGACGACTATGTTACCAGAACAAAATATTTTATTAT  
GCTGGTAGTTCTAGATTACTTACTGTTGGCCATCCATATTTTCTATTCGCCAGGCAAGT  
GGTAAAAATCGTATAGTTGTCCCCAAAGTGCTGGATACCAATATAGAGTGTTTCGTGTG  
CGGCTACCCGACCCAAATAAATTTGGACTACCTGATGCTTCATTATACAATCCCGATACC  
CAGCGCTTAGTGTTGGGCTTGTAAAGGCTCTGAGGTAGGCCGCGGACAGCCTTTAGGAATA  
GGTGTTAGTGCCATCCATTGTTTAAACAAGCTTAATGACACTGAAAATGCCACGCTGTTT  
GATGTTAATCCTGGTGAGGATACTCGGGATAATGTTTCTATGGATTATAAACAACACAA  
CTATGTATTATTGGTTGCAAGCCTCCCTTAGTGAACATTGGGCAAAAGGTACTCCATGC  
AGTGGCGCTTCAGCTGCCGTGGTAGTGTGCCCCCACTTGAACCTGCCAGTACTGTTATA  
CAGGATGGTGATATGGTAGACACAGGTTTTGGGGCAATGGATTTTGCAGCCCTGCAAACA  
AATAGGTCTGACGTTCCCTTGGATATTGTTACTACAACATGTAAATATCAGATTATTTTCG  
AATGGCTGCAGAGCCATTGGTGATCGCATGTTTTTCTTGCGCCGAGAGCAATGTTTTAAG  
ACATTTTATAATAGGCAGGCACACCTAGGCAGGGTTCCTGATGACTATTATTTAAAGGTT  
CACCTTCTACCTTTTCGTGCTTCCCCCTACAAGCTCTCTTTATGCATCCACACCTAGTGGGT  
CCATGGTTACCTCAGAGTCACAGTTGTTTAAACAAGCCTTACTGGCTACAACGTGCACAGG  
GCACAAACAATGGCATTGTTTGGGCAATCTGCTTTTTGTAACAGTTGTGACACATCACGT  
AGTACAAATATGTCCATCTGTGCTACCAAACTGTTGAGTCTACATATAAAGCCTCTAGT  
TTCATGGAATATTTGAGACATGGAGAAGAATTTGATTTGCAATTTATATTTCAACTATGT  
GTTATTAATTTAACAGCTGAAATTATGGCCTACTTACATGGCATGGATGCTACATTACTG  
GAGGACTGGAATTTTGGTTCCCTTACCACCTCCTACTGCTAGTCTTGGTGATACCTACCGC  
TTTTTACAGTCTCAGGCCATAACCTGTCAGAAAAACAGTCCTCCTCCTGCAGAAAAAAG  
GACCCCTATGCAGATCTTACATTTTGGGAGGTGGATTTAAAGGAGCGGTTTTCACTAGAA  
TTGGATCAGTTTCCATTGGGGCGCAAGTTTTTGTCTGCAAAGTGGCACCCGCTCGCGGCCT  
ACTGCATTGTCCCGTAAAAGGGTGCAGCATCTACCACATCCACCGCCCCCAAACGTAAA  
CGTGTTAAACGCTCCCGGTAGTAGTGGTGTTGTGTGTGTGTGAGTATGTATGTGTATGTGT  
GTGTGTGTGTGTGTGTGTGTGTGTGTGTGTGCATGTTTATATATGTATATGTGTTTGTGTG  
TATATTGTATGTTGTTGTGTACGTGTGTATATACTGTGCGACCCCTGGCTTCCTGTATG  
CATGTTTGTGTTGTTAATAAATGCGTGTCTATGTATGTGTGTTATTTGGTTGCACCCCTGT  
GAGTAAGTGTGCAAGCAGATATAACCCCCCTGTCCGGTGACGCCTTACTGACCAGTGAC  
CATGCCCTGCCCTTGGCCCCCTGGTTATATTTAAGGAACGAACCGTTTTTCGGTTGCCTAAA  
ATGGCCGCGCTTTTGGCTGGCGGCCCGCGTTTTTGGCGGGCTACTATACAATGGGTAATCC  
TTGTATTGCTTCATATCCTTTCCAACACAGGTGTGCATACCATCATAAGGTGTGCCTGGC  
AGTTATTTGGCACACTATAAATGCATGTTATAATTAACCTTTAATACATGTGTTACTCACC  
GTGCAATACCCATTGTTTGGGGCATATAGTTGTGCTGACTATGTTTCGCCTAAGTACGTTT  
TTGGCAACAGCAGTGTAGTTTCTGTCCAAGAATGTGTCTGCTAACTTTTATAATGTACTT  
AGCAACATGGTTTATACACACCTAATCCGGTTGTTCC

>gi|9628574|ref|NC\_001694.1|\_Human\_papillomavirus\_-\_61,\_complete\_genome  
TAACAATCATATATGTAAAAAGTAGGTTGGCACCGAAAACGGTCGGACCGACCTGGGTAC  
ATATATAAAGAAACCGTAGGGTCAGCAAAAGCACACTCATCTATGGGACCGTGCAATCCAA  
CTAATATTTTCTGCTCTGCAAGGACTACGAGGTGGACTTTGAGGATTTAAGGCTGACAT  
GTGTATTTTGCAAAAATGAATTAACAACAGAAGAATTGCTGGCGTTTGCCTAAAGGAGC  
TAAGCATTGTGTGGAGACATAACTGGCCATTTGGAGTATGCGCACCATGCTTGGCACGTG  
AAGTAAAAGTGAGGGAGCTGCGACATTGGGACCATTCTGTTACGGACCCACTGTGGAAC

AGACAACAGGACGGTCATTAGCTGAACTATATATACGGTGCCATGCATGCAGCAAACCGT  
TAAGTATACAGGAAAAGGAGCATCAGGTACAGGCATACATCCACTTCCACTATATAGCTG  
GACAGTGGACGGGAAGGTGTTGCCAGTGTAGAGGGCCATGCACGGCCAGGTGGCAACCAT  
AAAGGACATAGTCCTTGAAGAGCGTCCTGAGGTGGTTGACCTACATTGCAATGAGCAGTT  
ATTAGACAGCTCAGAGTCAGAGGAGGAGGATAGTGTGCGTGAGCAACTTGTGAACAAGC  
ACAGCAGGCCTACAGGGTGGTTACTACCTGTGGCATTGTGTAAGTGTCCAGTTAGGCTGGT  
GGTGCAGTGCGGAGACGCAGACCTGAAGGTGCTACATGAACTACTGCTGGGCGACTTGTC  
CATAGTGTGTCCTGGCTGCGCATAAGGGACATGGCTGACAGTGAAGGTACAGAAAAGCGGG  
GATGGGACCGAGGCGCGGAACGCGCAGGGGGGTGGTTTTCTGGTAGAAGCCGTGGTAGAC  
CGCACCACAGGATACCAGGTGTCCAGTGATGAGGAGGACAATAGCATTGACACAGGGGAA  
GACCTAGTAGACTTCATAGATACAAGGCGCCCCGGGGATGGGCAGGAAGTGCCGCTTGCG  
TTGTTTCGTTCAACAAAATGCACAGGATGACGCTGCAACGGTGCAGGCACTAAAACGAAAG  
TATACATGTAGCCCTGCAAGCAGCACCTGTGTGTCCTTGGTGGACAGTGAATTAAGTCCC  
CGGCTGGACGCCATACGGATACACCGGGGACAGGACAGGGCTAGGAGAAGGCTGTTTGAG  
CAAGATAGTGGCTATGGCCATACGCAAGTGGAATTTGGAGCATCAGAAAGTCAGGTACCG  
GGGGATGCGCAACATGAGGGGGGGGGGAATCCGTGCAGGAAGCAGAGGAGGAGCGTGGG  
GGGGGGGACGGAGAGGCCGAGGCCACAGGTAACCAGGAAACGCAAGCGCAGGAGCAGGCC  
GCAGACATATTAGAGGTGTTTAAAGTTAGTAATTTAAAAGCAAAATTACTGTACAAATTC  
AAGGACCTATTTGGCAGTAGCATTGTGGGAGCTGGTAAGAAATTTTAAAGTGATAAGTCA  
ATATGTGGGAGCTGGGTAATATGTGCGTTTGGTGTATACCATGCTGTGGCAGAGGCTGTA  
AAAACCTTAATAACAACCTATATGTGTGTATGTCACACATACAATAACAGACATGCCAGTGG  
GGAATGGTAATATTAATGCTTGTGCGATACAAATGTGGGAAGAGCAGGGAAACAGTAGCA  
CACAGCATGGGAAAACCTGTTAAACATACCGGAAAGACAGATGCTAATTGAACCACCAAAG  
ATTAGAAGCGCACCGTGCGCACTATATTGGTATAGAACAGCCATGGGAAACGCCAGCGAG  
GTGTATGGCGAAACACCTGAATGGATAGTAAGACAAACAGTGGTAGGACATGCAATGCAA  
GAAGCACAGTTTAGTTTGTCCATGTAGTGCAATGGGCATATGACAATGACATAACAGAT  
GAAAGTGTGCTGGCCTATGAATATGCATTGCTGGGAAATGAGGACCCAAATGCGGCGGCC  
TTCTTGGCCAGTAACTGCCAAGCAAAGTATATTAAAGATGCAATTACAATGTGTAAGCAT  
TATAGACGTGCAGAGCAGGCAAAAATGACAATGGCACAGTGGATTACACATAGAGGCCGC  
AAGGTGGCAGACACAGGGGATTGGAAGGCTATTGTAAAGTATTTAAGATATCAACAGGTA  
GAATTTGTACCATTTATTAGTGCCTTAAATTTGTTTCTAAAGGGGGTACCAAAAAAAGC  
TGCATGGTATTTTACGGACCAAGCGACACAGGGAAGTCGCTATTTTGCATGAGCCTACTA  
AATTTTCTGGGAGGAGCTGTGATTTTCATATGTAAATTC AAGCAGCCATTTTGGTTATCA  
CCTTTAGCAGATACTAAAGTGGGACTACTGGACGATGCCACCTATCAGTGCTGGCAATAC  
ATAGATACATATTTACGGACAGTATTAGATGGCAATGCCATAAGCATAGATAGGAAACAC  
AGAAATTTAACACAGCTGAAGTGTCTCCATTAATGATAACAACAAATATAAATCCACTA  
GAGGATCCTACGTTTAAATACCTGCACAGTAGAATAGTGGTGTTCAGTTTTTACATAAG  
TGTCCACTAAACAGTAATGGGGACCCAGTATATACCCTGAATAATGAAAAATTGGAAATCA  
TTTTTCCGAAGGTCCTGGGCACGCATAGAGGGATCTGATCAACAGGAGGAGGAGGAG  
GAGGATGAGGATGGAGTCACTAGCCGACCGTTTAGATGCGTGCCAGGAGAAATTACTAGA  
CCTCTATGAAAAAGATAGCAACAAGCTTGAGGACCAAATATTGCATTGGCACTATGTGCG  
TTTGGAAAAATGCAATGTTATTTAAGGCACGACAAGCAGGACTAACGCGTGTGGGCCACCA  
GATGGTGCCAACTTAGTGTTACAAAAGGCAAAGCACATAAAGCAATTGAAGTACATCT  
GTCATTGCAAGGGTTACAAACAAGTGCATATGCGCATGAACCCTGGACATTGCAAACCAC  
CTCTTTGGAAATGTGGAATACGCAGCCACAACGATGCTGGAAGAAAAAAGGACGCAGACT  
AACAGTTAAATTTGATGGCGAGGACCACAAAGCAGTGAATACGTTAGTTGGGGGTATAT  
TTATGTACAAAGCACAGAACTGATCTGTGGTATAAGGTTTCTGGAAAAGTGTATATAA  
GGGCCTATATTATGAAATGGAGGGACAGGAACACTATTATGTGACATTTGCACAGGAGGC  
CCAAAAATATGGGGAAACAGGCAAAATGGGAGGTACATATGGGAAACACAGTGATTTATGA  
ACCTTGCGCCTCTGTATCTAGTACCCAGGACGCCGTGCGAGAAGTATCCACTGCTGAAAC  
TGCTGGACACCTGCGGGACAACACCACAGACACCACCACCCCCACGTGCGTGGGCC  
CACCACAGACATCCACCTCGGTGCAGACGCCGCCCTCATAAGCGACAGCGACTCCACAGAGA  
CAGAGAGCAGCAGCCCGACACAACACAAAAAGACAACCACAAGCGGGTGGACAGTACTGA  
CCAGTGGATCAACGGTCACCGTAACAGCACAGAAACAGGGGACAACCTGTGACAGTTACAG  
TTCACCTGTAATACACCTAAAAGGTGATCCAAATAAATTAAAGTGTTTTCGGTATAGGTT

ACAACATTTCAGTACCTGAGCTGTTTGACAAAGCATCATCCACATGGCATTGGGCCGGTGG  
ACAAAGTACAACCAGAGCAGCATTTGTAACATTGTGGTATGTTAATGTGGAACAACGAAA  
ACAATTTTTTAAATCGTGTAACCATTCCAAAGGGTATACAAGCCACTGCAGGCTATATGTC  
AATGTGTATATAAGTGTGTGTATACAAAAACATAAATACTGTGTTGCAAGTATTGAGCCA  
GCTACAGCTATTTACATACCACACCTGCATTATTGTGTAAACCATAAACAATCCTGGACG  
AGCTTGTGTGTTTGATAGATGGATGGTGTACGATACTCCTGCTGCTTATACTTTTTCTGGC  
TTTCCTATCTTTCCTCACTAAGCGCATTTTTTGGTGTCTTTCTGTGCCATATATGTAGGAT  
TGTTGTGCATATACATGCAAGTGTTGTGGTATATGGAATAACTGTGGCGCCACCAGCCAT  
ACACTGCTGCTCATATGTAAATAGTGTTCCCTTGTGTCTGTTGTTTCGTTTGCAATATGTAT  
CCCCTTGTAGTTAGTTCCTCCTCAGGGGTTTGCATTACTGGTTGTGGATCAGCAAACTGC  
GGATTGTTATTTTTGTTTTTGTCTATTACTGCTTATTGCAATACTGTTGTACAGGCTTTTA  
CATTAGGTGGTGTACCTTGTGTGTTTTCCCTCCCCACAGTTTTTTACTTTGTTATATTTT  
TATATGTTTATGGCCTAATAAACATTATGGCTCTTAAACGTCGCAAGCGTCATCTGCAA  
CTGACCTCTATCGTACATGTAAACAATCAGGCACATGTCCCCCTGATGTTGTTCCAAAGG  
TGGAAGGGGATACCTTGCTGACCGCATTTTAAAGTGGGCTAGTTTGGGGGTTTTCTTTG  
GGGGATTGGGTATAGGCACCGGCTCTGGTACTGGGGGTCGTAAGGTTGTTGCTTATTG  
GCACCCGGCCTCCTACTGTAGTGGATATTGGCCCTGTGTCCCGCCCCCTGTAGTTATTG  
ATCCAGTGGGTGCTGCCGATCCCTCTATAGTTACCCTTGTAGAGGAATCCAGCGTCATTG  
AGGCTGGGGCTACAGTCCCTACATTTTTCCGGGTCCGGGGGCTTCAATGTCACGTCGTCTT  
CTACTACGACCCCGGCTGTGTGTGGACATTACTCCATCGGGTGGGTCGTGTCAGGTTAGCA  
GCACCAGTTTTTATTAATCCTTTATTCACTGAGCCTTCTATTATTGAACCTCCTCAGGCAG  
GGGACCTTGCCGGCATGTCAATTTCCAGTACCCCTACCGCTGGGTCCACAGTTTTTGAGG  
AAATCCCAATGCACACCTTTGCTACCTCTGAGGGTCCTGGAAGTAGTACCCCGCTGCCTG  
GCATCCGTCGCCTTGACGCGCCCCGCTGAATTTATACAGTAAGGCTAACCAACAAATTA  
AGGTTGCTAACCTACATTTATGTCTGATCCAGCCTCCTTAATTACATATGACAATCCTA  
TATTTGATCCTGAGGAACTATTATATTTGAACATCCTAGTATATATACACCTCCTGACC  
CGGACTTTTTAGATATTGTGTCCTTACACAGGCCCCGCGCTCACATCCCGCCAGGGAAGT  
TACGGTTTAGTCGCCTTGGTCAACGTGCCACCTTGCGTACCCGTAGTGGTAGGCGCATTG  
GCGCTCGGGTACACTTTTACCATGACATTAGTCCCATTCCATCGGATGCTGTGGAGTTAC  
AGCCTTTGGTGCCGTCCTCGTCCCCTAGTATAACATATGATATATATGCTGACCCTGAGG  
TGTTGGATCTTCTGCACAACATACACAACCCACACTTACAGTACAGGGCCCTTCCCTCT  
CTGCTGCATCTGCATCTACCAAGGTACACAATGTCACTGTTCCACTGGCCACAGGGCTTG  
ATACGCTGTGACATCTGGCCCTGATGTTGATTTTGCACATGCTCCTGCGCCTGTACCAG  
CTGTACCATATGTACCTGCCACCCATCCACATTCTATATATATATTCAGGGCTCTGATTTTT  
ATTTGTTGCCTGCTTATGTGTTTTTTTCCATAACGTGTAACGTGTACCCCTATTCTTTTT  
CAGATGGCTTTGTGGCGGCCTGGTGACGGCAAGGTATACCTGCCTCCCACTCCTGTGTCT  
AAAGTTATCAGTACTGACCGTTATGTGCAACGCACCAACTTATTTTATTATGGTGGCAGT  
TCCCGTCTGCTTACTGTAGGACATCCCTATTGTAGTTTGCAGCTTGATGGGCTGCAGGGC  
AAGAAAAACACTATCCCCAAGGTGTCTGGCTATCAATATAGGGTGTTTAGGGTACAGCTT  
CCTGACCCTAATAAATTTGCTTTGCCTGATGGCACCTTGTATAATCCTGATACTGAGCGC  
ATGGTGTGGGCCTGCAGGGGCATTGAGGTTGGTAGGGGGCAGCCATTGGGGGTTGGTACT  
AGTGGTCACCCGCTGTACAATCGCCTGGATGACACTGAAAACACCACATTACTTGTGCA  
GAGTCTCTGACAGTCGTGACAATGTGTCTGTTGATTATAAGCAGACCCAGCTACTTATT  
GTAGGTTGCAAACCCCTATTGGGGAACACTGGACAAAGGTTACTGCTTGTGCTAACCCC  
GCGCCCCGGCCACTGACTGTCTCCTCATTTGGAATTTACAAATACCACCATACAGGATGGC  
GATATGGTGGAAACAGGCTATGGGGCCATTGATTTTGTCTGCATTGCAGGAAAAATAATCT  
GAAGTGCCATTGGATATTTGCACCACTATATGCAAGTATCCTGATTATTTACAAATGGCT  
GCTGAACCATATGGAGACTGTATGTTTTTTGTTTACGCAGGGAACAAATGTTTGCTCGC  
CACTTTTCAATCGCCAGGGTGTATGGGTGAGGCACCTGACTCTTATTATCTTAAG  
GGTGCGAATGACAAGGCGGCCCTGGGTAGTTATATTTATTCCCCTACGCCCTAGTGGCTCT  
ATGGTGTCTCTGATTCCCAATTATTTAAGCCATATTGGCTGCAACGTGCCAGGGC  
CACAACAATGGTATTTGTTGGTTTAAATGAATTGTTTGTAAACGTTGTGGATACCACCCGC  
AGTACTAATTTAACCATTTGTACTGCTACATCCCCCCTGTATCTGAATATAAAGCCACA  
AGCTTTAGGGAATATTTGCGCCATACAGAGGAGTTTGATTTGCAATTTATTTTTCAGTTA  
TGTAATAATACATTTAACCCCTGAAATTATGGCCTACCTACATAATATGAATAAGGCCTTG

TTGGATGACTGGAAC TTTGGTGTGGTACCACCACCCTCTACCAGTTT TAGAAGACACATAT  
AGGTTTTTGCAGTCCAGAGCTATTACATGTCAGAAGGGTGCTGCTGCCCCGCCGCCAAG  
GAGGATCGCTATGCCAAGTTATCCTTTTGGACTGTTGATTTACGAGACAAGTTTTCCACT  
GATTTGGATCAGTTTCCTTTGGGGCGCAAGTTTTTATTGCAGGCCGGTCCCCGCTCAGTA  
TCTGTGTCACGCAAACGTGCTGCCCCAGCTCTACCCCTACATCCTCCCCCTGCTACAAAA  
CGCAAAAAGCGTAAACAGTAGTGATGTTTGTCTGTATGCTGTTGTTGTGCATGTGTTGTT  
TTGTATTGTGCTGTACTGGCCTTGTGCATGTGCTGTTTGTATGGTGCCTGGTTTGTATGA  
CTGTATTTGCTATGGTTGTGTATTGTGTGACCCTGTACTGACCCTTGTCCCCCTGTGTTGT  
GTATCTGTGGAATGTGTGTTACACTGTGTGTGCATTAATAAACTGTGTGTCATGTGTGTG  
TGGTGTCCGGTGCACCCTGTGAGTAAGTGTGTTTATTGTTGCACGCCCTTATTTTGTGCAG  
CTTCCCCATTTCTGTGTTCCCTTGTGTTTCGGGTAGCCATTTTGTGTTGCCGACCGTTTTCG  
GTCTCCCGCCTTTTTTGTGCGGACCGGTTTCGGTCGCCCCGCTTTTTTGGTTGTGGCACT  
ATGCCACTGTACACATACCACATCCTGTTTAAACAACTTTATGTGTTGCACCTGGGTGT  
GTTTGACAGGTTGCTAACACACACAGTTTGAACAATGCTCCATCTATCTTTTTTGACAT  
GTTGTGCAATTACTGTGCTTTTAGGCACATATTTTGTGCTGACTACTTCCCTTAATTGC  
TGGTTTGGCATTGCTTGTATACTTTTCTAGCCAGGAACTGTCTTGCAACTTTGGGCATG  
TTTTACACACATTATGTTACAAAGCCGATCCGGTCGCTCCCTATGTCTCATTTCTTTTAT  
GATAGTTTA

>gi|9627389|ref|NC\_001595.1|\_Human\_papillomavirus\_type\_7,\_complete\_genome

TGTTTAATAATTGTACAGTTACTAAAGGGCGTAACCGAAACGGTCCGACCGAAAACGGT  
ACATATAAAAACCAACCCAAAAAACCCTGATCTGGGGCCACTATGTCTGCACGTTGCGGCT  
CCACAGCTAGAAC TTTATTTGAATTATGTGACCAGTGCAATATAACATTGCCTACGTTGC  
AAATTAATTGCATATTTTGTAAACAGCATTTTACAAACAGCTGAGGTGCTGGCCTTTGCAT  
TTAGAGAGTTATATGTAGTGTGGCGCAACGACTTTTCCTTTTGCAGCGTGTGTAAAGTGTT  
TAGAATTTTATGGAAAAGTGAATCAGTATAGGAAC TTTAGATACGCTGCATATGCACCAA  
CAGTGGAAGAAGAAACAGGATTAACAATTTTAGAAGTGAGAATAAGATGCTGCAAATGCC  
ACAAACCATTGTCTCCTGTGGAAAAAACCAACCACATTGTTAAGAAGACACAGTTTTTTTA  
AACTGCAAGATTTCGTGGACAGGGTACTGTCTGCACTGTTGGAAGAAATGCATGGAGAAAG  
GCCAACGCTCGGAGACATCGTGTTAGACTTGCAACCCGAACCAGTAAGTTTAAGTTGCAA  
CGAGCAATTAGACAGCTCAGACTCAGAAGATGACCATGAACAAGACCAACTAGACAGCTC  
ACACAATAGACAGCGTGAGCAACCCACGCAACAGGACTTGCAAGTAAATTTGCAATCATT  
TAAATAGTAACACATTGTGTATTTTGTCACTGTTTAGTTTCGCCTAGTAGTCCATTGTAC  
TGCTACTGATATAAGGCAGGTTTCATCAGTTGCTGATGGGCACACTAAATATAGTGTGCCC  
CAACTGTGCAGCTACAGCGTGACAACAATGGCAGACGATTTCAGGTACAGAGGATGTGGGG  
TCTGGGTGTTTCAGGATGGTTTTTAGTTGAGGCTGTGGTAGATAAACAACAGGTGATGTA  
GTTTCAGAAGATGAAGATGAGGATGCTATAGAGGACAGTGGATATGATATGGTAGATTTT  
ATTAATGATACTGTAGTAAGTGAACATGAAGAACTAAGTAATGCACAGGCTTTGTTACAT  
GCACAACAGACATGTGCAGATGCTGTAGAGTTGTGTGAGCTAAAACGAAAAGTACATTAGT  
CCATATGTAAGTCCTATTTCAGTGCTCAGAACCGTCCGTGGACGGGGATTTAAGTCCAAGG  
CTGCATGCCATAAAGCTTGGCGGCGGTAAAAAGGCTAAAAGGCGGTGTTTGTGAGCGATTG  
GAGCAGCGAGACAGTGGCTATGGCTATTCACAAGTGGAACAACAGAGACACAGGTAGAG  
GAAGAACATGGCGAACCGGAAGGTATAGAGGGGGGCAGTGGGAGGGCTGCGACAGTTGAA  
ACGGAAGCGGTTGAAGTGCTAGAAGAAAGCAGTGATGTTATACAGCAACTTAGTCCGCGT  
ACACAGGTGGTAGAGCTGTTTAAATGCAAGGATTTAAATGCTAAACTGTGTGGTAAGTTT  
AAGGAAC TTTTGGAGTGGGCTTTCACGATTTGGTTAGACAGTTTAAAAGTGATAAATCA  
ACGTGTACAGATTGGGTGTACGCAGTGTTTGGGGTTAATCCCACTATAGCAGAAGGCTTT  
CATACATTATTAAAAGGACAGGCATTATACTTACATACACAGTGGACAACGTGTAGATGG  
GGTATGGTATTGCTTGCATTGTGTAGATATAAGGTAGCAAAAAATAGAGAAACAGTAGTG  
CGGCAGCTTGCCAAAAATGTTAAATGTACCAGATAATCAACTAATGGTACAACCACCTAAA  
TTACAAAGTTCTGCAGCGGCTTTATTTTGGTTTAGATCAGGAATGGGTAATGGAAGTGAG  
GTGTCTGGCACAAACACCGGAATGGATAGCTAAACAACAATGTTGGAACATAGTTTTGCT  
GAAGCACAGTTTAGTTTAACTCAGATGGTGCAGTGGGCATATGATAATGGGCATACAGAT  
GAATGTGAAATAGCATATTATTATGCACAAATAGCAGATATAGATGCAAAATGCAGCAGCG  
TTTTTAAAAAGTAACAATCAAGCTAAATATGTTAGAGATTGTGCAGCTATGTGTAAGCAT  
TATAGGTTGGCAGAAATGAGGCGGATGTCAATGGCAGACTGGATAAAGCATAGAGGTGAA



AAATGTGATGAAGGAGATTGGAAGCCTATAGTTAACTACTAAGATATCAACATATAGAC  
ATAATTGTGTTTTTAGCTGCGTTGAAAAAATGGCTACATGGAATACCAAAAAAATTTGT  
ATTTGTATTGTTGGACCTCCAGATACTGGAAAGTCATGTTTTGGTATGAGTTTGATGCAT  
TTTTTGC AAGTACTATAATTTTCATTTGTTAATTCGTGTAGCCATTTTTGGTTGCAATCA  
TTAGTGGACGCAAAAGTAGCTATGTTAGATGATGTGACTTCTGCATGCTGGGCCTATATG  
GATACACACATGAGAAATTTATTAGATGGAAACCAACAAGTATAGATAGAAAACATAAA  
TCATTGGCTGTGATTAAATGTCCTCCATTATTGTTAACATCAAATATAAACATTTAAACAT  
GATTGCAAAATATCAATATTTACAGAGTAGAGTGACAGTGTTTGAATTTCCAAATCCATTT  
CCATTTGACAGCAACGGAAATGCTGTGTATGAATTAAGTGATGCAAAATTGGAACCTCCTTT  
TTTTAAAGGTTGGCGTCCAGTTTAGAGCTGCAGACAACAGAGGACGAGGATGGAGAACT  
AGCCAGGCGCCTAGATTTGTGCCAGGAACAGTTGTTAGAATTTTATGAACAAGACAGCAA  
ACAGCTACAGCACCATATATTGCACTGGAAATATATACGTTATGAAAGTGTAATATATTA  
TACAGCAAGACAAATGGGCATTAAACGTCTGGGCCACCAGGTGGTGCCAAGTTTAGATGT  
GTCAAAAGCCAAAGCCCATGCAGCAATTGAAATGCAAATGTGTCTAGAATCTTTGCAAAC  
TACTGAATATAACTTAGAGCCATGGACGTTACAGGACACAAGTCAAGAACTATGGCTTGC  
AGAACCAAAGAAATGTTTTAAAAAAGGAGGAAAGACAGTAGAAGTTAGATTTGACTGTAA  
TGAACATAATGCAATGCATTATACTCTATGGACTGCAGTATATGTACAGGTGGAGGATAC  
ATGGACAAAGGTTGAAGGCCAGGTGGACCACAGAGGCCTATTTTATACAGTGCATGGGTG  
CACAACTATTATGTAGACTTTGGAAAGGAAGCACATACATATGGGAAAACAAATGACTG  
GACTGTTATTGTGGGTTCACGCGTTATATGTTCTCCTAGTACTGTCGAAGGGCTACCCAT  
TGTTGCGCCTGTTGACATCAGACATCCCCGCGCCACCGACGCCACCGACGCCACCAAGGT  
GCACGACGCCCCCTACGCCCTGCCCGCGTCGACCACCAAGTATACAACGACAGCCACGC  
ACCGCCCCGAAAGCGAAGGAGAGACGGAGACTTGTCCATCAGTGCAAGTGACGGATGTAG  
TGGAAGAAAAATACGTGGACACTGGAAAACAGAGCACGCTCGCCTGATATTGAAAGCAACAA  
CAAAATCAGGAACAGTGGTGGAGGTCAATTCTACACCTATAATACAACCTGGAAGGTGATGC  
CAATTGTTTTAAAGTGTTTTTAGATATAGGCTAACAAAGGTTAGCCATTTATATACAAATTC  
TTCAACTACATGGAGGTGGACTACAGAATCTAGAACAAATAAAAAATGCCATTATAACATT  
AACATATAGTAGTGACACCAACGGTCACAATTTCTAGCACTTGTA AAAATACCTAAAAC  
TATTAAACATAGTTTTAGGCATGTTA ACTATAATGTAAATATGTTTGTATATTTGTAAAAA  
ACATATGTATGGAACGCAACTGTGAAGGGTAATGCATATGCATTTACCACACAACCAGCC  
AAACTGCTGTTATTGGTGTTAATAGAGTCAACGCTTGGCATACTAATAGTATATATACTC  
TGTCTTATAACTGCAATTTTAATATGCATGCATATACCTGATTTCTGTGTCTGGAGCTCT  
TTGATGGCCACTATTTCTATTCTTTGCTTTATAACGTGGGGTGCACTAACATCTATTATT  
AACGTATTTTTTTTTAGTGTTGTTAGTGTTGTTATTTGCCTGCACTGTTCTTCATATGTCA  
ATTGTGTATGCTATACAACAAGAACAACAATAACAATAATTGCAAATATGTTAACCTGTA  
AATTAGATGATGGTGATACATGGATGGCATTATGGATGTTACTTACATTTATAACTGTAT  
TGTTACTGTTATTGGCGTTTTCAATTGTAGGACATTATATGTATACAAATATAGTAAGTAAA  
ATACTGTGTATTAATAAAATATTTTTATATTTGCAGCGCCTTGTTATGGTGTCCAGCAGG  
CCCCGTAGGCGTAAGCGGGCGTCCGCAACACAGTTATATCAAACATGCAAGGCAGCAGGC  
ACCTGTCCACCAGATGTTGTTAATAAGGTGGAGCAAACAACCGTTGCAGATCAAATTTTA  
AAATGGGGCAGCATGGGAGTGTTTTTTGGCGGTCTTGGCATAGGTTTCAGGCTCTGGCTCA  
GGCGGCCGTGCTGGCTATGTGCCTTTGTCTACAGGTTCCCGTGCAATACCTCCTAAATCA  
TTAGCTCCAGATGTTATTGCTAGGCCGCTGTTGTGGTGGATACTGTGCCCCCACTGAT  
CCATCCATTGTATCTTTAATTGAGGAAAGTAGTATTATTTCAGTCTGGGGCTCCTTCGCCA  
GTAATTCCCACAGAGGGTGGGTTTTCAATAACATCATCAGGTACAGATGTCCCTGCAATT  
TTAGATATATCTTCTACTAATACAGTACATGTTACATCTACCACACACCATAACCCATA  
TTTACTGATCCTTCGGTTGTGCAGCCTATTCCACCTGTAGAGGCTAGTGGTCGTATCATT  
GTGTCGCATTCCCTCTATTACTAGTGGTGCAGCTGAAGAAATACCTATGGACACATTTGTT  
GTTCATATGATCCACTGTCTCAGTACACCTGTGCCTGGTGTGTCAGCGCGGCCTAAAGTT  
GGGCTATATAGCAAAGCTTTGCAGCAAGTAGAAATAGTAGATCCAACATTTATGTCCACC  
CCTCAACGTTTTAATTACTTATGACAATCCTGTATTTGACAACATTGAAGATACACTACAT  
TTTGAACAGCCTTCTATTTCATAACGCACCAGATCCTGCCTTTATGGATATCATTACTTTA  
CATAGGCCTGCCTTGACCTCTAGGCGTGGTGTGGTACGTTTTTAGTAGGGTGGGTCAACGT  
GGAACCATGTATACACGTCGTGGTACCCGTATTGGTGGTTCGTGTACACTTTTTTTAAAGAT  
ATTAGTCCTATAGCTTCATCTGAAGAAATTGAATTGCACCCTCTAGTGGCCTCACCTAAT

AACAGTGACCTTTTTGATGTTTATGCAGATATAGATGATATTGATGAAAAATATATTATAT  
TCTACTATAGACAATAATACACCAACTTCTACCTATTCCTTGTATCCAGGTAATTCTACA  
CGCATAGCAAATACATCTATACCTCTTGCCACAATTCCTGATACATTCTTAACATCTGGT  
CCTGACATAGTGTTCCTTCTGTTCCCTGCAGGTACACCATATTTGCCTGTGTACACCTTCT  
ATACCTGCCATATCTGTACTGATTCTGCGGTACTGATTATTATTTGAATCCTGCATACTAT  
TTCAGAAAACGCCGAAAGCGCATATTAGCATATTAGGATGTGGCAACTTAATGAAAACCA  
AGTGTATTTACCACCGCCACGCCTGTTGCTACAATTGTTAGCACAGATGAGTACGTGCA  
ACGCACCAGTTTATATTATCATGCAGGTAGTACCAGGTTATTAACCATAGGACATCCATA  
TTTTGAATTGAAAAAGCCTAATGGCGATGTATCGGTGCCTAAAGTGTCTGGACATCAATA  
CAGAGTGTTTAGAGTACGCTTGCCCGACCTAATAAATTTGGATTATCAGACACGTCTTT  
ATTTAATTCTGAAACCCAACGCCTTGTATGGGCCTGTGTTGGTGTGAGGTCGGTCGAGG  
TCAGCCATTAGGTGTAGGCATTAGTGGTCATCCATACTTTAATAAAGATGAAGATGTGGA  
AAACTCGTCTGTATATGGAACAGTACCTGGTCAGGACAGCAGAGAAAAATGTTGCTATGGA  
TTATAAACAACTCAGTTATGTATTGTAGGCTGTACTCCTCCTATTGGAGAATATTGGGG  
TATGGGTACACCGTGCAATGCTTCTAAAGTGTCTCCTGGTGAAGTGTCTGTACTAGAATT  
AAAAAGTGAAGTTATTGAGGATGGCGACATGGTTGATGCAGGCTTTGGTGCCATGGATTT  
TGCATCATTCAGGCCAATAAAAGCGATGTGCCTTTAGATTTATGTACATCTATTAGTAA  
ATACCCAGATTATTTAGGAATGGCTGCAGAACCGTATGGTAATAGTTTATTTTTTTTTCT  
TAGAAGAGAACAATGTTTTGTTAGGCACTTTTTTAATAGGGCAGGAAGTACTGGAGACAG  
TGTTCCAAATGATTTTATATATAACAGGTTTCATCTAATCGCGCTTCTATTGCAGGCAGTAT  
TTATTATTCCACACCAAGTGGCTCTCTAGTTACCTCTGATTCTCAGATTTTAAATAAAC  
TTTGTGGATACAAAAGGCCAGGGTCATAACAATGGCATTGTGTTTTGGCAATCAGTTATT  
TGTTACAGTTGTAGATACTACTCGTAGCACAAATTTAACATTATGTGCTGCTACACAATC  
GCCCACACCAACACCATATGACAATAGTAAGTTTAAAGAATATTTACGTCATGGGGAAGA  
GTTTGATTTACAGTTTATTTTTTCAGTTATGTGTTATTACATTAAATGCAGAGGTTATGAC  
ATATATACATGCTATGGATTCTTCCTTATTAGATGATTGGAATTTTAAAAATTGGTCCTCC  
AGCGTCTGCAACCTTGGAAGATACTTATAGGTTTCTTACCAATAAAGCCATAGCATGTCA  
GCGTGATGCACCCCCAAAAGAAAAGGAGGATCCATATAAAAAATATAAATTTTGGGAAGT  
AAATTTAACAGAAAAATTTTCATCTCAGTTAGATCAATTTCCATTAGGACGTAAGTTTCT  
TATGCAGGCAGGCCTACGCACAGGGCCTAAGTTTAAATCCAGGAAGCGACCTGCCCTAC  
CTCTTCTTCTCTTCTGGGTGAGTCACCCCCAAACGTAAGAAAACAAAACGATGATTGTG  
TATGTGTGTGTGTGTGATACTCCCTTGCACTCCCTTATGTGTTGTTACTCTGGAATGTAT  
GTATGTGTTGTTTATGTATGTGTGTTGTATATGTTGTTTATGTGTGAGAATGTATTTGT  
GTGTATGAATGTAATGTATTGTTGTTGTGTTTGTTAATAATAAATATATTGTGTGTTGTG  
TGGTAAAGTACTTTCTTTGTTTTTAAAGTTACTTATTAACTCACTTATTTTAAATGTC  
TGCTCTGCACACTGCAACCGTTTTTCGGTCGCGGTTGGCAACTCATTACATTTGTCAGCAT  
GTTTTTATAACATGTTTAAAATTGTTAGCTTTATATAACTATATAAATCCTTCAATTTCC  
ACCCATAACCGTTTCCAGTCTCGGTTGGCAAGTCACCATGTTTGTGAGCATATTTGCATT  
GCATGTTTCAAATTGCTAGGTCAAAGTTCCCTGCCAAAATGCCGCCCAATATGTACTAT  
TAGGGTGAGGTTGCCACACCTTTAATTACACTTTTATTGCACTGTTACTCATCTTATTTT  
ATACGCTTCCAACTTGCTTTTAGGCACATAGTTTTACTGCATAAACATTTAGCTAATAG  
CAGTTTGGCACCACATAACACTATGGTTAACAAAATACACATTACTCATGGTACACACCT  
GCAAACCGCTTTCGGTTGCTACACGTTTTATTACTTTCTAGTTATTA

>gi|9627257|ref|NC\_001576.1|\_HumanPapillomavirus\_type\_10,\_complete\_genome

TTATAAACTATAATCTAGACAATAATAAATAGGGAGGGACCGAATACGGTGCGACCGAAT  
GGGGTACATATAAAACAAGGCCCGTAGCATCTGCAGAAGCTATGTCCATGGGTGCACAGG  
AACCCAGAAACATATTGCTTTTGTGTAGAAATTGTGGAATACCTTTGGAGGACCTTCGCC  
TGTGCTGTATATTTTGCACAAAACAGCTGACCGCAGCGGAATTGGCAGCATTTGCACTTA  
GAGAATTATATTTGGTGTGAGAGCGGGAGTGCCATACGGTGCCTGTGCACGGTGTTTAC  
TCCTACATAGGGCATTGTACGACGCCTAAAATATTGGGACTATTATATATGTAGAAGGTG  
TGGAAGAGGAGACCAAACAATCTATATATACACAGCTGATCAGATGCTACATGTGTACA  
AACCGCTGGTAAGGGAAGAAAAGACAGACATCGTAACGAACGGGACGACTGCACAAAA  
TATCAGGGTACTGGAGAGGTAGTTGTGAGTATTGCTGGTCACGATGCACGGTCCGCATCC  
CACAGTAAAAAGATATCGAATTGAGTCTTGACACAGAGGATATCCCTGTATGCAATGTGCA  
ATTAGATGAAGAAGATTATACAGATGCGGTGGAACCAGCACACAACAAGCGTATAGGGTGGT

AACAGAATGTACAAAGTGTAGTTTACCACTGCGACTGGTGGTAGAGTGCAGCCACGCAGA  
TATAAGGGCACTGGAACAGCTGCTACTAGGCACATTGAAGCTCGTGTGTCTCGCTGCGT  
GTAACAGGACATGGACGATAATACAGGTACAGAGGGGGGCGCATGTTCCGAATCGGAACG  
GGCGGGTGGATGGTTTATAGTGGAAGCCATTGTAGATAGGCGGACAGGCGATCCAATATC  
TAGTGATGATGATGAGGAGGAGGACGAAGCAGGGGAAGACTTTGTAGACTTTATAGATGA  
TACTAGGTGCTAGGGGATGGACAGGAAGTGGCACAGGAAGTGTTCAGCAGCAGACAGC  
TGCAGATGACGATGTAGCTGTGCAGACTGTAAAACGAAAGTTTGCACCCAGTCCTTATTT  
CAGCCCCGTGTGTGAGCAAGCCAGCATAGAACATGAACTAAGCCCAAGGCTAGACGCCAT  
AAAGCTGGGGAGACAGTCAGCAAAAGGCCAAACGTCGGCTGTTTGTAGCTACCGGACAGTGG  
CTATGGCCAAAACACAGGTGGATACGGAATCGGGACCAAACAGGTACAGGGCAGTAGTGA  
AACGCAAGATGGCCGACAGGATGATGATGAGGGGAGTGTGGTACAGAGCACACTTGACAC  
AGGCAACCAAAATGGCCGCCAGAACAATGATGAGGGGAGTGGGAGGAATGTGGGGGAACA  
TGGCAGCCAAGAGGAGGAGCGTGCAGGAGGGGATGGGGAGGAATCTGACTTACAAAGTAC  
AAGCACTGGCAAGGGAGCAGGTGGCGTGGTAGAAATATTAAGAGCCAGCAATAAGAAAGC  
AACTCTACTGGGTAAGTTTAAAGAACAGTTTGGGTTGGGGTATAACGAACTAATTAGGCA  
CTTTAAAAGTGATAGAACATCGTGTGCCGACTGGGTGGTGTGTGTGTTCGGGGTGTTTTG  
CACAGTGGCAGAGGGCATAAAGACCCTAATACAACCATTGTGTGATTATGCACACATACA  
AGTGCTACCATGCCAATGGGGAATGACAGTGCTTATGCTGGTACGGTACAAACGTGCCAA  
AAACAGGGAAACAGTGGCTAAAGGCTTAAGCACATTATTAAATGTACCGGAAAGCCAGAT  
GTTAATTTGAACCACCAAAATACGAAGTGGTCCAGCAGCGTTGTATTGGTACAAGACTAG  
TATGTCCAGCTGTAGCGAGCTGTATGGGGAAACACCAGAGTGGATAGTCAGGCAGACAAT  
GGTGGGACATGCAATGGAGGATGCGCAGTTTAGCCTTTCAGAGATGGTGCAGTGGGCATA  
TGACCATGATATTACAGACGAGAGCACGCTGGCATAACGAGTATGCACTGATTGCTGACAC  
AGATTCAAAATGCAGCTGCGTTTTCTAAGTAGCAATTGTGAGGCTAAATATCTAAAGGATGC  
ATGCACAATGTGCAGACATTATAAAAGAGGAGAACAGGCGCGCATGAGCATGTCAGAATG  
GATATGGTTTAGAGGCGACAAAGTACAGGGAGATGGAGATTGGAAACCAATAGTTCAATT  
TTTAAGATATCAGGATGTTGAATTTATCCCATTCCCTATGTGCCTTTAAAACATTCCCTACA  
AGGAGTACCAAAAAAAGTTGTTTAGTGTTTATGGACCAGCAGACACTGGCAAATCATA  
CTTTTGTATGAGCTTACTTAGATTTTTGGGGGGGGCTGTTATATCCTATGCTAACTCAAG  
CAGCCATTTTTGGTTGCAGCCATTATCTGAAGCCAAAATAGGACTGTTAGATGATGCAAC  
TAGTCAGTGTTGGAATATATTGACACTTATTTAAGAAATGCCTTAGATGGCAACCAAT  
ATGTGTAGACAGAAAGCATAGAGCATTGTTACAGCTAAAATGCCCTCCACTATTAATAAC  
AACAAATATAAATCCATTGACGGATGAAAGATGGAAGTTTTTGGCGAGCAGATTGCAGCT  
CTTCACATTTAAAAACCCTTTTCCAGTGACAACACAAGGAGAACCAATGTATACATTAAA  
TGATCAAAATTTGGAATGCTTTTTTTCGAAGGTTATGGGCACGTTTAAGCCTTACCGATCC  
TGAAGACGAGGAGGAGCATGGAAACCCTAGCGAACCCTTTAGATGCGTGCCAGGACAAAA  
TGCTAGAACTATATGAAAAGGATAGCGACAAACTTGAGGACCAGATCACGCATTGGCACT  
TATTGCGTGTAGAAAATGCTTTGCTGTACAAAGCAAGAGAATGTGGACTGACACATATTG  
GCCATCAGGTGGTGCCACCTCTTAGTGTAACATAAGCCAAGGCACGCAATGCCATTGAAG  
TGCATGTAGCTTTACAGCAATTGCAAGAAAAGTGCCTATGCACACGAACCCCTGGACATTGC  
GGGACACATCACGTGAAATGTGGGACACTGCTCCTAAAGGGTGCTGGAAAAAAGGGGGA  
TAACTGTTGAAGTCAGATATGATGGAGACGAATCTAAAGCCATGTGCTATGTACAATGGA  
GGGAACCTTTATGTGCAGAACTATAGTGACGATAGATGGGTGAAGGTGCCAGGAAAAGTCT  
CATACGAGGGTCTATATTATACACATGAAAATATGAACATATATTATGTGAATTTCAAGG  
ATGACGCTTGTGTATATGGGGAAACAGGC AAAATGGGAGGTACATGTGGGAGGCAAAGTAA  
TTCACCATGATGCATTTGACCCTGTATCTAGCACACGAGAAATATCCACTCCTGGACCTG  
TGTGCACCAAGTAACACCACCCAGCGTCCACCCAAGCCCAGGTGGGCGCGTCCGAGGGAC  
CGGAACAAAAGCGACAGCGACTCGAGGCGGTTCGACGGACAGCAGCAGCAGCGACAAG  
GGTCCCAAGATTCCACCCAGAAGGCCGGAACGAGCGGGTGGACAAGTGGACAGTGACA  
GGACCCGGTGTGTGACACTAGAAGTGCACACCCCGTCCGGCACCCAAGTGACCCTGACT  
GTGCACCTGTAATACACCTACGAGGTGATCCTAACAGTTTAAAATGCTTTAGATATAGAT  
TACACCACGGAAAAAAGGAAACTATACTCACGGTCATCCTCCACATGGAGGTGGTCTTGTG  
AGTCAGAAAAACCAGGCAGCGTTTTGTAACGCTTTGGGTATACCAGCGATACACAGCGTACTG  
AATTTCTTAATGTTGTAAAGGTTCCCCCTGGCATACAAGTGATTTTGGGGTATATGTCAA  
TATTCTAATATGTCAGATATTTCTATACATATATAGATCTATAGGGTGATTGTACATTCT

GGATTTTTACTTGTGTCGACTACATTGCTGGGCTTTTTTTGTGCTGCTGCTGTGTTTGT  
TTGGCTGTGTGTGCTTCCCGCGCTGACGTGCTATCTGGCATTGTGTGCTTGTGTGTACTT  
GGGCCTTATAGCATTATATTTACAAATTGTGACACGTATTGTACAGGTCAACACATAGGT  
CTCACAATGTATCCTCTTATATTAAGAGATCACACTGGTGACCATCCTGTATTGTTGTTT  
GAGCCGGGGGACGTGTATTTACTACTGTGTGTAATCATTTTTTGTATAATAGCACTGTTT  
GTGTTATATAGACATCTTGGTGTATTGTAACATAATATGTGGTAGCCTGTACGGATCCCA  
CATAGGGGGTGTATATCATATGTTGTTGTTGTGTGTACCCTAGTGTGCTATTGTGGCAC  
CATTCTTTTTCTATTTTTGTTTTTTTTTTTACAGTTAAATAAAGCAACCATGGTGGCACA  
ACGTGCAAGGCGTCGCAAGCGTGACATCCGCCACACAGCTTTATAGGACCTGCAAGGCCTC  
AGGCACATGCCCCCAGATGTTATTTCCCAAAGTAGAGGGCACCACCTTGGCAGATCGCAT  
TTTGCAGTGGGGTAGCCTTGGTGTATATTTGGGGGGCCTAGGCATTGGAACGGGTCTGG  
TACTGGGGGTCGCACGGGGTATGTTCCATCAGTACACGACCTGGCACTGTTGTGGATGT  
TAGTGTTCTGCCAGGCCTCCTGTTGTTATTGAGCCTGTAGGCCCCGTAGATCCTTCCAT  
TGTAATTTGTTGGAGGACTCCAGCATTATTAATTCAGGGTCCACCATACCTACATTTTC  
TGGTACTAGTGGCTTTGAAGTTACATCCTCTGCCACAACCACCCAGCTGTGTTGGACAT  
CACACCTGCCAGTGAGAATGTGGTTATTAGTAGTACAACTTTACAAATCCTGCATTAC  
AGAGCCGTCCCTTGTAGAAGTTCACAGAGTGGTGAGGTTTCGGGACACATACTTATAAG  
CACACCTACAGCTGGCACCCATGGATATGAGGAAATACCCATGGACACGTTTGCTTCTTC  
GGGTACTGGCAGGAAACCGTAACAGCAGTACCCCTGTGCCTGGTGTGTCAGTAGAATAGCAGG  
CCCACGCTTATATAGCAGGGCTAACACACAGTCAAGGTGTCCGATCCTGCATTTCTGTC  
ACGTCCCTTCTCCTTGTAAACATTTGACAATCCTGTGTTTGAACCGGAGGATGAAACAAT  
CATATTCGAACGTCCGTACTCTCCCTCACGGGTGCCGGACCCTGATTTCTTGACATTGT  
GCGTCTGCATCGCCCTGCATTAACATCTCGCAGGGGTACTGTACGTTTCAGCCGCCTGGG  
TCAAAAGTTCAGCATGCGCACACGAGTGGCAAGGGTATTGGAGCCCGGGTACATTACTA  
TCAGGACCTTAGCCCTATAGCCCCAATCGAGGACATTGAAATGGAACCTTTACTTGCTCC  
AGCTGCCTCTGACACTATTTATGACATTTTTGCTGATGTTGATGATGGTGATGTTGCTTT  
TACAGAGGGATATCGTAGTACCACACAGTCCAGGGGATATAATACCACTTCCCCTTTGTC  
TTCTACACTTTCACCTAAGTATGGAAATGTAACAATTCCTTTGTGTCTCCTGTTGATGT  
AACTTTACATACTGGGCCTGATATTGTACTACCTACTTCAGCACAGTGGCCATATGTGCC  
CCTGTACCTGCTGACACCACCCATTATGTGTACATAGATGGCGGGGATTTCTATCTTTG  
GCCTGTTACCTTTCACTTCTCCCGACATCGTCGCCGTAAACGTGTCTCATATTTTTTTGC  
AGATGGCACTCTGGCGCTCTAGTGACAACCTGGTGTACCTGCCTCCCACTCCCGTGTCTA  
AAGTTCTCAGCACGGACGACTATGTGACACGCACCAACATTTACTATTATGCAGGCACTT  
CACGGTTGCTTACTGTAGGCCATCCATATTTTCCCTATACCTAAGTCAAGTAACAATAAGG  
TAGATGTCCCCAAGGTATCTGCATTTCAATATAGGGTGTTCGGGTGCGGTTGCCTGACC  
CTAATAAGTTTGGACTGCCTGACGCCCCGATATATAACCCTGACGCCGAGCGACTGGTCT  
GGGCTTGTACTGGGGTTGAGGTAGGTCTGTGGACAGCCACTGGGTGTGGGGCTCAGTGGAC  
ACCCTCTATATAATAAGCTAGAGGACACAGAAAACCTCTAATATAGCACATGGGCCAATTG  
GTCAGGATTCACGGGACAATATTTCTGTTGATAATAAGCAAACACAGCTATGTATTATTG  
GTTGTACACCTCCAATGGGAGAGCATTGGGGCAAGGGAACCCCGTGCAGGAACCCACCTG  
CACAGGGCGATTGCCCTCCCCTGGAGCTTATAACTTCCCCTATTACAGGATGGTGATATGG  
TGGACACTGGCTATGGGGCCATGGACTTTACTGCTTTACAATTAATAAGTCTGACGTGC  
CTATAGATATTTGCCAATCTACTTGTAAATATCCAGATTATTTGGGAATGGCCGCGGAGC  
CTTATGGCGACAGCATGTTCTTTTACTTGCGCAGGGAACAACCTGTTTGCAAGACATTTCT  
TTAATCGGGCTAGTGCTGTTGGAGACGCCATCCCAGACACTTTCATATTAAAGAGCAACG  
GTGGGGGGCGAGACGTTGGTAGTGCTGTGTATAGCCCCACACCCAGTGGGTCCATGGTAA  
CGTCTGAGGCTCAATTGTTTAATAAGCCATATTGGCTGCGGCGGGCCAGGGGCACAACA  
ATGGTATATGCTGGGCTAACCAATTGTTTGTACTGTGGTAGACACGACTCGCAGTACCA  
ATATGTGCTTGTGTGTTCTTCTGAGGCCCTCCCCTGCCACTACGTATGACGCCACCAAT  
TTAAAGAATATTTGAGGCACGGAGAGGAATGATTTGCAGTTCATTTTTTCAGTTGTGTA  
AGGTAACATTGACCCCGGATATTATGGCCTATTTGCACACCATGAATAGTAGTTTATTGG  
AGGATTGGAACTTTGGGTTAACTTTGCCACCGTCCACTAGCTTGGAGGACACATATAGAT  
TTTTGTCTCTTTCAGCCATTACTTGTGCAAAAGATACACCCCCACCGAGAAGCAGGATC  
CCTATGCAAAACTTAACTTTTGGGACGTAGATCTTAAGGATAGGTTTTCCCTGGACCTGT  
CTCAGTTTCCCCTGGGACGAAAATTTTTGCTGCAGCTGGGTGTACGTTCTCGCTCCGCCG

TCTCCGTCCGCAAACGCCCCGGCGACTTCCGCGACAGGATCCACGGCTGCAAAAAGAAAA  
GAACTAAGAAATAACTGCATGTTTGTGTAAATGTATGTGCATATTTGTGTATGTGGTTG  
GCTGTTAATAGGTGTTTGTAAATGTCTATGTATGTGTGTATGTATGTAATGTGTTTGTATG  
TTATGAGCATGTATGTGTGTATGTGTAAATAAAGTTTGTACATAGTTTATATTTTTTTA  
ATTTGTGTAATTGCTGTTCTGTGAGTAAGTAAGGTTGTTCTAGGTCAGGAGACCGATTT  
CGGTACAAGATGGCCGCCCTTTCCAGGTGTGCACACCACCAATTAGTCATGCTGATCTATA  
TCCTGCGACCTGCCCTGTACGCCATTTTTTTGGCTAAGATTGTATAGTTTCTATAGTTT  
AGTTTATTGCTGTATCATGCTTTCTGGCACGGCAAACGTCTCCATTGCAAATTTAACAG  
CTTCTGGGCACCAACTTATTATGACTACTTTCACATAATTACTGTTCTGGCTGCGTTTTT  
TAGGTTGCCCTTGCCAATAAAATGTGCTTCCAAATCTCCACCAAGACACACCTAATCCGGT  
CGCTGCTTGCTTTCTAGCTTTAATTAATGCAGTTGCTACACGTCTCTTTCTAACTATAA  
>gi|9627145|ref|NC\_001531.1|\_Human\_papillomavirus\_-5,\_complete\_genome  
AACGGTAAGTTGCAATTTCTTGTACCAGGTGCGGTATTGGGATTTACAAATTATAATGG  
TTGTTGCCAACTACCATAGGCATATTCAAGTTTTTGCCTGTATCGTTTTCGTATCCTGTA  
ATAATATCCAATATATGTATACATAAAATAAATATATATATATAAAGTGCTAAGATTGG  
GTTCTTCTGTAATCAGGCAATGGCTGAGGGAGCCGAACACCAACAGAACTGACAGAAAA  
AGATAAGGCAGAATTACCTTTAAGTATTAGAGACTTAGCTGAAGCCTTAGGCATCCCTGT  
GATTGATTGTTAATACCTTGCAATTTCTGTGGCAACTTTCTAAATTATTGGAAGCTTG  
TGAATTCGACTACAAAAGGCTTAGTCTAATTTGGAAAGATTATTGTGTGTTGCGTGCTG  
TCGCGTATGCTGTGGCGCCACTGCAACTTATGAATTTAACCAATTTTATGAGCAGACAGT  
GTTAGGAAGAGATATTGAATTAGCTTCAGGACTTTCAATATTTGATATTGATATCAGGTG  
TCAAACCTTGCTTAGCATTTCTTGACATTATAGAAAAGTTAGATTGCTGTGGCAGAGGCCT  
TCCCTTTTCATAAGGTGAGGAACGCCTGGAAGGGAATCTGTAGGCAGTGTAAGCATTTTTA  
TCATGATTGGTAAAGAGGTACCCGTGCAAGATATTATTCTGGAGCTCAGTGAGGTGCAGC  
CCGAAGTGCTACCAGTTGACCTGTTTTGTGAAGAGGAATTACCAAACGAGCAGGAAACGG  
AGGAGGAGCCTGACAACGAAAGGATCTCTTACAAAGTTATAGCTCCGTGCGGTTGCAGGA  
ACTGTGAGGTCAAGCTTCGCATTTTTGTCCACGCCACAGAATTTGGTATTAGAGCTTTCC  
AACAGCTACTGACCGGAGATCTGCAGCTCCTGTGCCCTGACTGTGCGGAACTGCAAAC  
ATGACGGATCCTAATTTCTAAAGGTAGTACATCTAAAGAAGGGTTTGGTGATTGGTGTTTA  
TTGGAAGCTGACTGTAGTGATGTAGAAAATGATTTGGGACAATTATTTGAGAGAGATACA  
GACTCTGATATATCGGATTTGTTAGATGATACTGAAGTGGAGCAGGGCAATTCCTGGAA  
CTATTTTCATCAACAGGAGTGTGAGCAGAGCGAGGAGCAATTGCAAAAACATAAACGAAAG  
TATCTTAGTCCAAAAGCTGTGCGACAGCTTAGTCCGCGACTTGAGTCAATTTCAATTGTCA  
CCCCAGCAGAAGTCTAAGCGAAGGCTCTTTGCAGAGCAGGACAGCGGACTCGAGCTGACT  
TTAAACAATGAAGCTGAAGATGTTACTCCTGAGGTGGAGGTACCGGCTATTGACTCTCGG  
CCGGATGACGAGGGAGGTTTCAGGGGACGTAGATATACATTACACTGCATTGTTGCGTTCT  
AGCAACAAAAAAGCTACATTAATGGCTAAGTTTAAAGAGTCGTTTGGAGTAGGTTTTAAT  
GAATTGACACGGCAATTCAAAAGCCACAAAACCTGCTGTAAGGACTGGGTTGTCTCTGTA  
TATGCAGTGCATGATGATCTATTTGAAAAGCTCAAAGCAGCTATTGCAACAGCATTGTGAC  
TATATCTGGGTCCGTGGGATAGGTGCAATGTCATTATACCTATTGTGTTTTAAGGCGGGA  
AAAAATCGCGGGACAGTTTCATAAGTTAATTACCTCAATGTTAAATGTGCATGAACAGCAA  
ATATTGTCTGAGCCGCCAAAATTGAGAAATACAGCCGCTGCATTGTTCTGGTATAAGGGT  
TGTATGGGATCGGGGGCGTTTAGCCATGGACCATATCCTGATTGGATTGCCCAACAACT  
ATATTAGGTCACAAAAGTGCTGAGGCAAGTACTTTTGATTTTTTCAGCAATGGTCCAATGG  
GCATTTTCATAATCACTTATTAGACGAAGCAGATATAGCATAACAGTATGCAAGGCTTGCT  
CCCGAAGACGCGAATGCAGTAGCTTGCTTGACACATAACAACCAGGCCAAATTTGTGAGA  
GAATGTGCATATATGGTACGATTTTATAAGAAGGGACAAATGAGAGACATGAGTATATCT  
GAATGGATATACACTAAAATCAATGAAGTAGAAGGGGAAGGGCACTGGTCAGATATAGTA  
AAGTTTATTAGTATACCAAAAATAAACTTTATTGTATTCTAAGTCAATTTAAAGAATTCT  
CTACACTCAGTGCCAAAAAAATTTGCATTTTAAATTTATGGTCCCTCCAAATTTGGAAAG  
TCATCATTTGCAATGTCATTAATAAGAGTGTTGAAGGGTAGAGTGTTGTCATTTGTAAAT  
TCTAAAAGTCAGTTTTTGGCTGCAACCCCTTTTCAGAGTGCAAGATAGCTCTATTGGATGAT  
GTAACAGACCCCTTGTTGGATATACATGGATACATATTTAAGAAATGGCTTGGATGGACAT  
TATGTTTTCATTAGATTGTAAATATAGAGCCCCAACGCAAATGAAATTTCCCCCATTTATTA  
TTAACATCTAACATTAATGTGCATGGGGAACTAATTATAGATATTTACACACTACAATA

AAAGGATTTGAATTTCCAAATCCTTTTCTATGAAAGCAGATAATACACCTCAGTTCGAA  
CTAACTGACCAAAGCTGGAAATCTTTTTTTACAAGGCTTTGGACACAATTAGACCTGAGT  
GATCAAGAAGAGGAGGGCGAGGATGGAGAATCTCAGCGAGCGTTTCAATGCTCTGCAAGA  
TCAGCTAATGAACATTTATGAAGCTGCAGAACAAACATTGCAGGCACAAATTAAACATTG  
GCAAACCTTACGAAAAGAACCTGTATTACTCTACTATGCTAGGGAGAAAGGTGTTACAAG  
GCTTGGATATCAACCTGTGCCTGTAAAGGCAGTATCAGAAACAAAGGCTAAAGAAGCCAT  
AGCAATGGTGCTGCAGCTTGAGTCACTACAGACATCTGATTTTGCTCATGAGCCATGGAC  
TCTAGTTGATACCAGCATAGAAACATTTAGAAAGCGCTCCAGAAGGTCACTTCAAAAAAGG  
CCCCCTCCCTGTAGAAGTTATTTATGACAAATGATCCAGATAATGCCAATTTGTATACAAT  
GTGGACCTATGTGTATTATATGGATGCGGATGATAAGTGGCATAAAGGCAAGAAGTGGGGT  
GAATCACATTGGCATTATTATTTACAAGGAACTTTTAAAACTATTATGTACTGTTTGC  
TGACGATGCGAAAAGATATGGTACAACCTGGAGAATGGGAAGTAAAAGTTAATAAGGAAAC  
TGTGTTTGCTCCTGTCACCAGCTCCACGCCCTCCAGGGTCGCCAGGAGGACAAGCAGACAC  
AAACACCACCCCCGCGACCCCCACCACCTCCACAACCGCCGTTGACTCCACGTCCAGACA  
GCTCACCACATCAAAACAGCCACAACAAACCGAAACCAGAGGAAGAAGGTACGGACGGAG  
GCCCTCCAGCAAGTCAAGGAGATCGCAAACGCAGCAAAGGCGATCAAGGTCCCGACACCG  
GTCCCGGTCTCGGTCCCGGTGCGGGTCCAAGTCCCAAACCCACACCACTCGGTCCACCAC  
CAGGTCCCGGTCCACGTGCTCACCAGACTCGGGCCCTTACAAGCAGATCGCGATCCAG  
AGGAAGGTCCCCAACCCCTGCAGAAAGGGAGGTGGAAGGTCAACCAGGCGGCGATCAAG  
GTCACCTCCACCTCCTCCTCCTGCAGACACAAACGGTCAAGCGGGCACGAGCCGAAAG  
TTCAACAACAGAGGGGGCCGAGGGTCCAGAGGGTCAAGAGGAGGGAGCCGTGGGGGGAG  
AGGGCGGCGACGAGGAAGGTATCCTCCTCCTCCTCCCCGCCCACAAACGGTCAAGAGG  
GGGGTCTGCTAAGCTCCGTGGCGTCTCTCCTGGTGAAGTGGGAGGGTCACTTCGATCAGT  
TAGTTCAAAGCATAACAGGACGACTTGGAAGATTACTGGAAGAAGCTCGCGACCCCCCAGT  
AATCATTGTCAAAGGGGCGGCTAACACACTGAAAAATGTCCGCAACAGAGCTAAAATTAA  
ATACATGGGACTGTTTAGGTCATTTAGTACTACCTGGTCAATGGGTGGCAGGAGATGGCAC  
TGAGCGTCTAGGCAGGCCAGAATGCTCATTAGCTTTTCTTCTATACTCAAAGGAGAGA  
TTTTGATGAAGCGGTGCGATACCCCAAAGGAGTTGATAAGGCCTATGGCAACCTGGACAG  
TCTTTAACATTTACTAATGCTGCTTTTGCTACTAACATACTAACATAACCTAGCATTTTA  
TATTTTTTTTTTACATTTTGTATTTGCTATGGCGCGTGCAAAAACGGTCAAGCGAGACTCT  
GTAACTCATATTTACCAAACCTGCAAACAGGCAGGCACCTGCCCCCTGATGTTATTAAT  
AAAGTGGAAACAAACAACAGTTGCTGACAATATTTTAAAATATGGCAGTGCTGGTGTATTT  
TTTGGTGGCCTTGGTATTAGTACAGGCCGAGGAACCTGGGGGTGCTACAGGGTACGTGCCA  
CTTGGGGAAGGTCTGGTGTCCGTGTCGGAGGAACCCCCACGGTTGTAAGGCCTTCCTTG  
GTTCTGAAACAATCGGGCCCGTTGATATTTTGCCATTGATACAGTTAACCCCGTGGAA  
CCTACAGCATCATCCGTGGTCCCTCTAACTGAGTCCACAGGCGCTGATTTACTTCCAGGT  
GAAGTAGAAACAATTGCTGAAATCCATCCTGTACCTGAGGGGCCATCAGTGGATACCCCT  
GTAGTTACCACTAGCACAGGTTCCAGTGCTGTTTTAGAGGTTGCCCCAGAGCCTATTCCT  
CCAACACGGGTCAGGGTTTCACGCACACAGTATCACAATCCATCTTTTCAAATAATAACT  
GAGTCTACTCCAGCACAAAGGGGAATCGTCTCTTGACAGATCACGTTTTGGTGACATCGGGT  
TCTGGGGGGCAACGAATAGGGGGTGATATAACTGACATAATTGAGTTAGAGGAAATTCCT  
AGTAGGTATACATTTGAAATTGAAGAACCAACTCCTCCACGCCGACAGTACTCCATTG  
CCACGCAATCAATCTGTAGGCCGTAGGAGGGGTTTCTCTTTGACTAATAGACGTTTAGTA  
CAGCAGGTACAAGTGGACAATCCATTGTTTCTAACTCAACCATCTAAGTTAGTTCGTTTT  
GCATTTGATAATCCTGTTTTTGAGGAAGAAGTGACTAATATATTTGAAAATGATCTGGAT  
GTCTTTGAAGAACCCTCCAGACAGAGATTTTCTTGATGTTAGGGAATTGGGACGTCCACAA  
TATTCTACAACACCAGCGGGATATGTTAGAGTAAGCAGGTTGGGGACTCGAGCCACTATT  
CGCACTCGCTCTGGTGCACAGATAGGGTCGCAAGTCCATTTTTTACAGAGATCTTAGCTCT  
ATTAATACTGAAGATCCTATTGAATTACAATTATTAGGCCAACATTCAGGTGATGCTACT  
ATAGTCCACGGACCTGTTGAAGCACATTTATAGATATGGATATTTCTGAAAATCCATTA  
TCTGAAAGCATTGAAGCATATTCACATGATTTATTATTAGATGAAACGGTGGAAGATTTT  
AGTGGGTCTCAGCTGGTTATAGGTAATCGAAGGAGCACAACTCTTACACTGTTCCTAGG  
TTTGAAAATACAAGAAATGGTTCATACTATACACAAGACACAAAGGGATATTATGTTGCA  
TATCCAGAGTCACGTAATAATGCAGAAATCATTTATCCTACACCTGATATTCCTGTAGTC  
ATTATACACCCCTCATGACAGTACAGGGGACTTTTTATTACATCCCAGTCTTCACAGGCGC

AAACGTAAAAGAAAATATTTGTGATTTGCATTCGAGATGGCAGTGTGGCACTCGGCTAAT  
GGTAAAGTATATCTTCCACCATCGACACCGGTGGCCAGAGTCCAAAGCACCGATGAATAC  
ATTCAAAGAACAAATATCTACTATCATGCATTTAGTGACAGATTGTTAACTGTAGGTCAT  
CCTTATTTCAATGTATACAATATTAATGGTGATAAGCTTGAGGTTCCCTAAGGTTTCAGGA  
AATCAACACAGAGTATTTTCGCCTAAAATTACCAGATCCTAACAGATTTGCATTACCTGAT  
ATGTCTGTTTACAACCCTGACAAAGAACGTTTGGTTTGGGCCTGTAGAGGCTTAGAAATA  
GGTAGGGGCCAGCCATTAGGTGTACGGAGTACTGGTCACCCTTATTTCAATAAAGTAAAA  
GATACAGAAAAACAGTAATGCATACATAACATTTTTCTAAAGATGACAGACAGGATACATCT  
TTTGATCCTAAACAGATCCAAATGTTTATTGTAGGATGCACACCTTGCATAGGAGAGCAT  
TGGGATAAAAGCTGTTCCATGTGCAGAAAAATGATCAGCAAACCTGGCCTTTGTCTCCTATT  
GAACTAAAAAACACATATATACAAGATGGTGATATGGCAGACATAGGTTTTGGGAACATG  
AATTTTAAGGCACCTCAAGATAGTAGATCAGATGTCAGTTTAGACATCGTCAATGAAACT  
TGCAAGTATCCAGATTTTTTAAAGATGCAAAACGATATTTATGGCGATGCGTGCTTTTTT  
TATGCTCGTAGGGAGCAATGTTATGCCAGACACTTTTTTGTAGAGGGGGAAAAACTGGT  
GATGACATTCACGTGCACAAATTGACAATGGTACATACAAAAATCAGTTTTACATTCCA  
GGGGCTGATGGCCAAGCTCAAAGACTATAGGAAATTCATGTATTTCCCAACTGTTAGT  
GGCTCATTAGTATCCAGTGATGCTCAATTGTTTAAACAGGCCCTTCTGGCTCCAAAGAGCC  
CAAGGTCATAATAATGGCATCCTGTGGGCTAATCAAATGTTTATCACAGTGTTGACAAC  
ACAAGAAATACTAATTTTCAGTATTTCTGTATATAATCAGGCTGGAGCACTAAAAGATGTT  
GCAGATAATAATGCAGATCAATTTAGAGAATATCAAAGACATGTAGAAGAATATGAAATA  
TCTTTAATTTCTACAACCTCTGTAAGGTTCCTTTAAAGGCACAGGTATTGGCACAGATCAAT  
GCAATGAACCTCTTCGTTATTGGAGGATTGGCAGTTAGGATTTGTTCCCACTCCTGATAAT  
CCAATTCAGGACACCTACAGATATATTGACTCTTTGGCTACACGGTGTCCAGATAAGAAT  
CCTCCGAAAAGAAAAGGAAGACCCCTTATAAGGGCTTACATTTTTTGGGATGTAGATTTAACT  
GAAAGATTGTCATTAGATTTAGATCAATATTCCTTAGGCAGAAAAATTTTTATTCCAAGCT  
GGGTTACAACAAACGACCGTTAACGGTACAAAAGCAGTGTCTTATAAAGGGTCTAATAGA  
GGAACAAAACGCAAACGTAAAAATTGAGGTCTGACCGAAAGTGGTACATTTTTTATAAACT  
TTTACACAGTATTCAAGGAATGTTTGTACTCTGACTAAGTATAAGTCTTCCAAGGATA  
CCGACCGCACCCGGTACACTCAGTCAAGTTGTTGCCAATATAGAATCAGATCAGTGCCAA  
ACACACCGTCTTGGACTCAGAACAGACCGTGTTCGTTATAACATGCTCGGATTAGGGACC  
TCCCCAAAGAAGATTTAATCTACAATCGCTTTTGGCAATCGCATTTGGCACTGCTAAAAG  
ACCGTT

>gi|9626597|ref|NC\_001457.1|\_HumanPapillomavirus\_type\_4,\_complete\_genome

GTCTGTAATGATAGTTGGCAACAATCATTACTTATAGCTATATATAACCGGAAGAGATAC  
ATATAAAAAGGGACAGTGCATTTCTACTAAATCCTGTCCAGATGGCAGATGGCAGACCTG  
CAACCTTGACGACTTCTGCAGACGATTCGACATTTCCCTTTTTTGATTTGCGCCTTACTT  
GTATTTTTTTGTTCTCATACTGTGATCTTGCGGATCTTGCTTTATTCTATCTTAAGAAAC  
TTAGTTTAGTATTTAGAGGAAATTGTTATTATGCATGTTGTTCTGAATGCTTAAGATTAA  
GTGCACTGTTTGAACAAGAGAATTATTTTCAATGTTCTATTAAAGCTGTACATTTGGAGG  
AAATTGCTCAGAAAAAGATTAAAGGAAATTTGCATTAGATGCATTTGCTGCCTTAGATTAC  
TTGATATTGTTGAGAAATTAGATTTATTATACTCTGACGAGACTTGCTATTTAATAAGGG  
GTTTGTGGAGGGGCTATTGCAGAAATTGTATTAGGAAACAATGAGAGGAGCAGCGCCAC  
GGTTGCAGATCTTAATTTAGAACTAAATGACTTAGTGTTACCAGCAAACCTGCTGAGTGA  
GGAGGTCTTGCAATCTTCAGATGATGAGTATGAGATTACAGAGGAGGAGTCGGTGGTTCC  
ATTTAGAATAGACACCTGTTGCTATAGATGTGAAGTTGCTGTAAGAATTACATTGTATGC  
TGCTGAGCTCGGACTACGGACCTTGGAACAACCTTCTGTAGAAGGAAAGCTGACGTTTTG  
CTGCACCGCTTGTGCAAGAAGTCTTAACAGAAATGGCAGATAAAGGTACAGACAATTTTG  
ACTTAGAAGGGAATAATTGGTATATTGTCCATGAAGCAGAATGCACTGACAGTATAGATA  
CGTTGGATGATTTATGCGACGAAAGTAATGACGATTCAAACATTTCTAACTTAATTGATG  
ACGATGTTCGTTGATCAGGGGAATTCCTTGCCTGTACAATGCACAAATAAATGAGGATT  
GTGACAATGCACCTAGCACACCTAAAACGAAAGTATAACAAAAGTCCAGAGCAGGCAGTCG  
CTGAATTGAGTCCGCAGTTGCAGGCTGTGAAAATAACTCCTGAAAAGACACAGCAAAGGA  
GATTATTTTCAAGGACAGTGGGATTTTTCGAAGATGAAGCTGAAAATTCTCTTACACAGGTAG  
AATCCGAGAGCCAGGCTGGACCTTCTAGCCAAGATGGCGGCGGAGATATTAATTTGTTGT  
TGTTACAAAAGTAGTAACAGGAGGGCAACAATGCTAGCAAAGTTTAAAGAATGGTATGGGG

TCTCATACAATGAAATAACAAGAATTTATAAAAGTGATAAATCTTGTAGTGATAATTGGG  
TAATAGTTATTTTTAGAGCTGCTGTTGAAGTATTAGAAAGTTCAAAGATTGTTTTAAAGC  
AGCATTGTACATATATTCAAGTTAAGATCTTTGGATTTTCAGCTTTATATTTAGTACAGT  
TTAAAAGTGCGAAAAGTAGAGAACTGTACAAAAGTTGATGTGTTCTATATTAAATATCC  
AAGAATATCAAATGTTATGTGATCCTCCAAAATTACGAAGTGTACCCACAGCATTATACT  
TTTATAAGCATGCTATGTTAACAGAGAGTTCTGTTTTTGGACAAACACCGGATTGGATCG  
CAAAACAAACTCTCGTAAGTCATCAAGCAGCACTACTGCAGAGACTTTTGAGTTATCTA  
GAATGGTTTCAGTGGGCATACGATAATAATTATGTGGATGAATGTGACATTGCTTATCACT  
ATGCAATGTACGCAGAGGAGGATGCAAAATGCTGCTGCTTATTTAAAAAGTAATAATCAAG  
TAAAGCATGTACGAGATTGTAGTACAATGGTCAGGATGTATAAAAGATATGAAATGAGAG  
ATATGTCAATGTCAGAATGGATTTATAAAATGTTGTGATGAATGTTCTGAAGAAGGAGATT  
GGAAGCCAATCTCACAGTTTTTAAAAATATCAAGGTGTTAATATATTATCCTTTCTTATAG  
TGCTTAAATCATTTTTTAAAGGTATTCCAAAAAAAACTGTATAGTTATTCATGGTCCAC  
CAGATACAGGAAAATCATTATTTTTGTTATCTTTTTATAAAATTTTTTAAAAGGAAAAGTAG  
TTTCATATGTAAATAGAAGTAGCCATTTTTGGTTGCAGCCTCTGATGGATTGCAAGGTAG  
GATTTATGGATGATGCTACCTATGTGTGCTGGACATATATAGATCAAAATTTAAGGAATG  
CATTAGATGGTAATCCAATGTGTATTGACGCTAAACACAGAGCACCACAACAATTAATAAT  
TACCACCAATGCTAATAACGTCAAATATTGATATTAACAGGAACAATCTTTAATGTATT  
TACACAGTAGAATACAGTGTGTTTAAATTTTCCTAACAAAATGCCTATTTTAGATGATGGTA  
GTCCTATGTATACATTTTACTGACGGTACTTGGAATCTTTTTTCCAAAAGCTTGGCAGAC  
AATTAGAATTAACAGATCCTGAAGAGGAAAAACAATGGAGTCCCTAGTCGCACGTTTCGAT  
GCACCTCAAGAAGCAATTCTGACTCATATTGAGTCACAGGAGAGCACTTTGGAATCCCAA  
ATCCAATATTGGGAAAATATCAGAAAAAGAAAATGCTATAATGCATTATGCTCGAAAACAA  
GGCCTAACCAAATTAGGTCTACAACCACTTCCTACACTAGCAGTAACTGAATACAATGCA  
AAGCAAGCTATTCAGATACATTTAACTTTGCAATCATTGTTAAAAATCTCCCTTTGCATCT  
GAACGGTGGACATTGACAGATGTTAGTGCGAAGCTGATAAATACCTCTCCACAAAACGTG  
TTAAAAAAGGGAGGTTATGATGTTGCTGTGTGGTTTGATAATGATAGACAGAATGCAATG  
CTGTACACAAATTTGGGACTTTTTTATATTATCAAGATATGAATGAACAGTGGCACAAAGTT  
AAAGGTGAAGTGGATTATGATGGCTTATACTTTACAGACCATACGGGAGAAAGAGCTTAT  
TTTACATTATTTAGCTCTGATGCTCAAAGATTTAGCAGAACTGGACTGTGGACTGTGCAT  
TTTTAAACCCAAGTTATTTCTCCCTATTGTTAGCTCTACATACTCCTCCTCCTTCGAC  
ACTGAGGAACAACAGTTACCCGGGCCCTCCACCAGCTACTCCGAAGTTACCGAGCAGGCG  
AGCCCTACTCGAAGGAGGAAACCGAGGAAATCCGACGCGACCTCCACCACGTCCCCTGAA  
ACCGAGGGAGTACGACTACGACGAAGACGACGAGAAGGAAAATCAGGGCCCGGGTCAGGA  
GAAACCCCCCGCAAAAGAAGAAGAGGAGGAGGAAGAGGAGGAGAGACCGAATTGGGA  
TCTGCACCATCTCCTGCAGAAGTGGGGAGCAGACATCGACAAGTTGAAAGACAAGGTCTG  
TCGCGACTTGGACTCTTACAAGCAGAAGCTAGGGATCCGCCTATGATATTGTTAAAGGGC  
ACAGCAAATTCCTTGAAATGTTGGAGATATAGAAAAGTTAACTCAAATGCTGCAACTTC  
TTATTTCATGAGTACTGTTTGAACTGGGTGAGATTGCTCACATAATCATAGTCGCATG  
CTTATTGCATTTGATAGCACTGACCAAGAGACGCTTTTGTAACACAAACCTTTTTCCT  
AACTGTGTACATATACCTACGGCTCATTGAATAGTTTATAAAATGCAAAGCTTGAGTAG  
AAGGAAAAGAGATTCAGTTCCAAATCTTTATGCAAAATGTCAACTGTCTGGCAATTGCCT  
ACCTGATGTAAAAAATAAAGTAGAAGCTGATACTCTTGCTGATCGTTTGCTGAGATGGTT  
GGGAAGTGTAATATACCTAGGAGGCTTGGGTATTGGTACTGGGAGAGGTAGTGGGGGGTC  
AACTGGGTATAATCCAATTGGAGCTCCAAGTAGAGTCACACCTAGTGGTACTTTAGTAAG  
GCCTACAGTGCCTGTGGAAAGTTTGGGACCCTCAGAAATAATCCCAATAGATGCAATAGA  
CCCAACAACATCTTCTGTTGTGCCATTAGAGGATCTGACCATCCCAGATGTCACAGTAGA  
TAGTGAGAGATACAAGAGGAATAGGGGAGACTACTCTTCAGCCTGCACAAGTAGATATTT  
AACATCAGATGACCTATATCAGATGTCAGTGGTGTAGCAGCCACCTACAATCATATC  
TGGCGAGGATAACGCCATTGCAAGTGTAGTGTGTCCCCTATAGAACCCTCCACAAAACG  
GATAGCATTGGCAACTAGGGGAGCCTCAGCAACTCCACATGTAAGTGTATATCTGGCAC  
AACCGAATTCGGTCAAGTCATCTGATCTGAATGTATTTGTGAATGCCACATTTTCAGGCGA  
TTCCATTGGTTATACAGAAGAAATTCATTAGAACCGTTGAACCCCTTTCAAGAATTCGA  
AATAGAAAAGCCCTCCAAAACTAGTACACCACGTGACGTTTTTAAATCGTGCAATAGGAAG  
AGCACGGGATTTATATAATAGAAGGGTTCAGCAAATACCTACTAGGAACCCAGCTTTACT



GACACAGCCTTCCCGCGCAATAGTATTTGGATTTGAAAATCCCGCCTTTGATGCTGACAT  
CACTCAAACATTTGAGCGGGATTTAGAACAGGTTGCAGCAGCTCCAGATGCTGACTTTGC  
AGACATAGTCACTATAGGGCGTCCAAGGTTTTCAGAGACAGATGCTGGTCAAATTAGAGT  
TAGCAGGCTTGGACGCCGAGGCACAATAAAAACTAGAAGTGGTGTGCAAATTGGGCAGGC  
GGTTCATTTTATTACGACCTAAGTACAATAGATACTGCTGATGCTATTGAATTATCTAC  
TTTAGGTCAACATTCAGGAGAACAAGCATTGTTGATGCTATGATAGAAAGCAGCTTAAT  
AGATCCTTTTGAAATGCCCGATCCTACTTTTACAGAAGAACAACAGCTTTTAGATCCACT  
TACAGAAGATTTTAGTCAGTCACACTTGGTGCTTACTAGTAGCAGACGTGGGACATCATT  
TACTATACCTACAATACCACCTGGATTAGGTCTTAGAATTTATGTAGATGATGTAGGTTT  
TGATTTATTTGTTTCCCTATCCAGAATCTAGAGTAATACCTGCTGGAGGTTTACCAACTGA  
GCCATTTGTTTCCCTCTAGAACCAGCTTTGTTATCTGATATATTTAGTACGGATTTTGTATA  
TCGTCCTAGTTTATATCGCAAGAAACGGAAACGATTAGAAATGTTTAAATTGTTTTGCAG  
GAACATGTGCGAGTTGGTTATCTACAACGGGTAAAGTCTACTTACCTCCAGCTCAACCTGT  
GGCAAGAGTTTGGAAACTGACGAATATATCACTGGAACATCTCTGTATTTCCACGCTGG  
TACAGAAAGGCTTTTAACTGTAGGCCATCCTTATTTTCCAGTGAAAGATGTACAGGAACC  
TCACAAAGTATTAGTTCCTAAGGTTTCAGGAAGTCAATTTAGAGTGTTTAGATTCAATTT  
GCCAGACCCAAACAGATTTGCTTTAATTGATAATGGCTTTTATGATTCTGATCATGAACG  
CCTAGTATGGAACTGAGGGGAATAGAAATAGGAAGAGGAGGACCGCTTGGTATAGGTAC  
TACAGGTCATCCTTTATATAAAGTTTGGAGACACAGAAAATCCTAATGGCTACAAAA  
GCAATCAGATGATAAATAGACAGGATGTCTTTTAGACCCAAAACACAGATGTTTTAT  
TATAGGTTGCACTCCTGCAATAGGTGAACATTTGGGATAAAGCTGAACCTTGTCAGCCC  
TGCTCCGCAACAGGGAGATTGCCACCAATAGAGCTTGTAATTCATACATCAAGATGG  
AGATATGTGTGACATTGGATTTGGGGCTTTCAATTTTAAAGCTTTGCAGGCTGATAAATC  
TAGTGCTCCTTTGGATGTCAATTGCCACAGTTTGTAAATGGCCAGATTTTTTAAAAATGGG  
GAAAGATATCTATGGAGATAGCTTGTTTTTCTTTGGAAGAAGAGAACAACCTATATGCCAG  
ACATTTCTTTGTGTCAGAGCAGGCACCATGGGAGATGCTCTACCAGAACCTTTTGAAGCTAC  
CTCAGATTATTTTATTGGTGCTCAAAACCAACAAGATCAGTACACTTTAGGACCTCATAT  
TTATGTAGGGACCCCTAGTGCTCTTTAGTATCCAGTGAATCCAGTTGTTAATCGACC  
GTATTGGTTAAACAGAGCTCAGGGTACAAATAATGGAATTTGTTGGGATAATCAGTTGTT  
TGTTACTCTTGTAGATAACACTCATAATACAACTTTACAATTTCTGTGAAGTCAGATGG  
TGCTAATGACAATTATCAGTATAAAGCTAGTGATTTTAAACAGTACCTCAGACATATAGA  
GGAGTTTGAAATGGAATTTATATTTCACTTTGTAAAGTTCTCTAACTGCAGATGTTAT  
GGCTCATTTAAATGTAATGAATCCTAATATTTTGGATAATTGGCAGTTAAATTTTGTTC  
ACCACCTCCCTCTGGAATTGAGGATCAATATAGATTTTTTGCAATCTAGAGCTACAAGATG  
CCCTACACAGACCCCTGCAACTGAAAAAGAAGATCCATATAAAGATTTGTCTTTTTGGGT  
TGTTGATTTAAGTGAAAGATTTTCCAGTGAATTGAGCCAATTTTCTTAGGCAGGCGGTT  
TTTATATCAAAGTGGTTTAATTAATGGTTCTCTAAAACGTAAAAGAATAATAAGTTCTTC  
TCATGCACAACTAATACCAAACGTTCTGCCAAACGAAAACGGTCTCTGAAATAACAATG  
TGAACCTTCTGGAATGTTTTATTCTGCCAGGAAAACCTTCAACTGAGCCAAATTATTAT  
ATAATCGTTCTTAATCTCAAAATTGAGCTAATTATATAAGATTTGCAAACGTGTATGTAT  
CTGTTTTTGTGAACATAGTGAAATAAACTGCCACATACTTGCCAGTGTCCAGTCTCTCT  
GAGTCATTTGGTCAACATGCGTCCGCACCCCAATAATTATTTGCATACACAGATCAGTAG  
GAGAGGCGCCAAGACGGACATATCCTCTCAAATTTCCCTTAAAATTATTGAATTTAACAA  
CTGTAAGCTACAAAAGACCGTTATCGTTTCTCTAACCTTGGGAAAAAGGTGAGTGAAAG  
TTTTATTGCACCTTTTGTGAGTCAATTTGTCTGGCGGCGCTGAACGAATTTGGCTGTCAG  
CCTTTGCACCGGAGTGGTGAAAAATAGTTTCT

>gi|9626069|ref|NC\_001357.1|\_HumanPapillomavirus\_-18,\_complete\_genome  
ATTAATACTTTTAACAATTGTAGTATATAAAAAAGGGAGTAACCGAAAACGGTCGGGACC  
GAAACCGGTGTATATAAAAGATGTGAGAAACACACCACAATACTATGGCGCGCTTTGAGG  
ATCCAACACGGCGACCTCAACAGCTACCTGATCTGTGCACGGAACCTGAACACTTCACTGC  
AAGACATAGAAATAACCTGTGTATATTGCAAGACAGTATTGGAACCTTACAGAGGTATTTG  
AATTTGCATTTAAAGATTTATTTGTGGTGTATAGAGACAGTATACCCCATGCTGCATGCC  
ATAAATGTATAGATTTTTATTCTAGAATTAGAGAATTAAGACATTATTCAGACTCTGTGT  
ATGGAGACACATTGGAAAACTAACTAACACTGGGTATACAATTTATTAATAAGGTGCC  
TGCGGTGCCAGAAACCGTTGAATCCAGCAGAAAACTTAGACACCTTAATGAAAAACGAC

GATTTTCAACAATAGCTGGGCACTATAGAGGCCAGTGCCATTTCGTGCTGCAACCGAGCAC  
GACAGGAACGACTCCAACGACGCAGAGAAACACAAGTATAATATTAAGTATGCATGGACC  
TAAGGCAACATTGCAAGACATTGTATTGCATTTAGAGCCCCAAAATGAAATTCGGTTGA  
CCTTCTATGTCACGAGCAATTAAGCGACTCAGAGGAAGAAAACGATGAAATAGATGGAGT  
TAATCATCAACATTTACCAGCCGACGAGCCGAACCACAACGTCACACAATGTTGTGTAT  
GTGTTGTAAGTGTGAAGCCAGAATTGAGCTAGTAGTAGAAAGCTCAGCAGACGACCTTCG  
AGCATTCCAGCAGCTGTTTCTGAACACCCTGTCCTTTGTGTGTCCGTGGTGTGCATCCCA  
GCAGTAAGCAACAATGGCTGATCCAGAAAGGTACAGACGGGGAGGGCACGGGTTGTAACGG  
CTGGTTTTTATGTACAAGCTATTGTAGACAAAAAACAGGAGATGTAATATCAGATGACGA  
GGACGAAAAATGCAACAGACACAGGGTCGGATATGGTAGATTTTATTGATACACAAGGAAC  
ATTTTGTGAACAGGCAGAGCTAGAGACAGCACAGGCATTGTTCCATGCGCAGGAGGTCCA  
CAATGATGCACAAGTGTTCATGTTTTAAAAACGAAAGTTTGCAGGAGGCAGCACAGAAAA  
CAGTCCATTAGGGGAGCGGCTGGAGGTGGATACAGAGTTAAGTCCACGGTTACAAGAAAT  
ATCTTTAAATAGTGGGCAGAAAAAGGCCAAAAAGCGGCTGTTTACAATATCAGATAGTGG  
CTATGGCTGTTCTGAAGTGGAAGCAACACAGATTCAGGTAAC TACAAATGGCGAACATGG  
CGGCAATGTATGTAGTGGCGGCAGTACGGAGGCTATAGACAACGGGGGCACAGAGGGCAA  
CAACAGCAGTGTAGACGGTACAAGTGACAATAGCAATATAGAAAATGTAAATCCACAATG  
TACCATAGCACAAATTAAGACTTGTAAAAAGTAAACAATAAACAAGGAGCTATGTTAGC  
AGTATTTAAAGACACATATGGGCTATCATTTACAGATTTAGTTAGAAATTTTAAAGTGA  
TAAACCCAGTGTACAGATTTGGGTACAGCTATATTTGGAGTAAACCCAACAATAGCAGA  
AGGATTTAAACACTAATACAGCCATTTATATTTATATGCCATATTCAATGTCTAGACTG  
TAAATGGGGAGTATTAATATTAGCCCTGTTGCGTTACAAATGTGGTAAGAGTAGACTAAC  
AGTTGCTAAAGGTTTTAAGTACGTTGTTACACGTACCTGAAACTTGTATGTTAATTCAACC  
ACCAAAATTGCGAAGTAGTGTTCAGCACTATATTGGTATAGAACAGGAATATCAAATAT  
TAGTGAAGTAATGGGAGACACACCTGAGTGGATACAAAGACTTACTATTATACAACATGG  
AATAGATGATAGCAATTTTGATTTGTCAGAAATGGTACAATGGGCATTTGATAATGAGCT  
GACAGATGAAAGCGATATGGCATTGTAATATGCCTTATTAGCAGACAGCAACAGCAATGC  
AGCTGCCTTTTAAAGCAATTGCCAAGCTAAATATTTAAAGATTGTGCCACAATGTG  
CAAACATTATAGGCGAGCCCCAAAACGACAAATGAATATGTCACAGTGGATACGATTTAG  
ATGTTCAAAAATAGATGAAGGGGGAGATTGGAGACCAATAGTGCAATTCCTGCGATACCA  
ACAAATAGAGTTTATAACATTTTATAGGAGCCTTAAATCATTTTTAAAGGAACCCCCAA  
AAAAAATTGTTTAGTATTTTGTGGACCAGCAAATACAGGAAAATCATATTTTGGAAATGAG  
TTTTATACACTTTATACAAGGAGCAGTAATATCATTTGTGAATTCCACTAGTCATTTTTG  
GTTGGAACCGTTAACAGATACTAAGGTGGCCATGTTAGATGATGCAACGACCACGTGTTG  
GACATACTTTGATACCTATATGAGAAATGCGTTAGATGGCAATCCAATAAGTATTGATAG  
AAAGCACAAACCATTAATACAACATAAAATGTCCTCCAATACTACTAACCACAAATATACA  
TCCAGCAAAGGATAATAGATGGCCATATTTAGAAAGTAGAATAACAGTATTTGAATTTCC  
AAATGCATTTCCATTTGATAAAAAATGGCAATCCAGTATATGAAATAAATGACAAAAATTG  
GAAATGTTTTTTTGAAGGACATGGTCCAGATTAGATTTGCACGAGGAAGAGGAAGATGC  
AGACACCGAAGGAAACCCTTTTCGGAACGTTTAAAGTTGCGTGCAGGACAAAATCATAGACC  
ACTATGAAAAATGACAGTAAAGACATAGACAGCCAAATACAGTATTGGCAACTAATACGTT  
GGGAAAATGCAATATTCCTTTCAGCAAGGGAACATGGCATAACAGACATTAAACCACCAGG  
TGGTGCCAGCCTATAACATTTCAAAAAGTAAAGCACATAAAGCTATTGAACTGCAAATGG  
CCCTACAAGGCCTTGCACAAAGTCGATACAAAACCGAGGATTGGACACTGCAAGACACAT  
GCGAGGAACATATGGAATACAGAACCTACTCACTGCTTTAAAAAAGGTGGCCAAACAGTAC  
AAGTATATTTTGATGGCAACAAAGACAATTGTATGACCTATGTAGCATGGGACAGTGTGT  
ATTATATGACTGATGCAGGAACATGGGACAAAACCGCTACCTGTGTAAGTCACAGGGGAT  
TGTATTATGTAAAGGAAGGTACAACACGTTTTTATATAGAATTTAAAGTGAATGTGAAA  
AATATGGGAACACAGGTACGTGGGAAGTACATTTTGGGAATAATGTAATTGATTGTAATG  
ACTCTATGTGTCAGTACCAGTACGACACCGTATCCGCTACTCAGCTTGTAAACAGCTAC  
AGCACACCCCTCACCGTATTCCAGCACCGTGTCCGTGGGCACCGCAAAGACCTACGGCC  
AGACGTGCGCTGCTACACGACCTGGACACTGTGGACTCGCGGAGAAGCAGCATTGTGGAC  
CTGTCAACCCACTTCTCGGTGCAGCTACACCTACAGGCAACAACAAAAAGACGGAACTCT  
GTAGTGGTAACACTACGCCTATAATACATTTTAAAGGTGACAGAAACAGTTTAAATGTT  
TACGGTACAGATTGCGAAAACATAGCGACCCTATAGAGATATATCATCCACCTGGCATT

GGACAGGTGCAGGCAATGAAAAACAGGAATACTGACTGTAACATACCATAGTGAAACAC  
AAAGAACAAAATTTTTAAATACTGTTGCAATTCAGATAGTGTACAAATATTGGTGGGAT  
ACATGACAATGTAATACATATGCTGTAGTACCAATATGTTATCACTTATTTTTTTATTTT  
GCTTTTGTGTATGCATGTATGTGTGCTGCCATGTCCCGCTTTTGCCATCTGTCTGTATGT  
GTGCGTATGCATGGGTATTGGTATTTGTGTATATTGTGGTAATAACGTCCCCTGCCACAG  
CATTCACAGTATATGTATTTTGTTTTTTATTGCCCATGTTACTATTGCATATACATGCTA  
TATTGTCTTTACAGTAATTGTATAGGTTGTTTTATACAGTGTATTGTACATTGTATATTT  
TGTTTTTATACCTTTTTATGCTTTTTTGTATTTTTTGTAAATAAAAGTATGGTATCCCACCGTGC  
CGCACGACGCAAACGGGCTTCGGTAACCTGACTTATATAAAACATGTAAACAATCTGGTAC  
ATGTCCACCTGATGTTGTTTCTTAAGGTGGAGGGCACCACGTTAGCAGATAAAATATTGCA  
ATGGTCAAGCCTTGGTATATTTTTTGGGTGGACTTGGCATAGGTACTGGCAGTGGTACAGG  
GGGTGCTACAGGGTACATTCCATTGGGTGGGCGTTCCAATACAGTGGTGGATGTTGGTCC  
TACACGTCCCCCAGTGGTTATTGAACCTGTGGGCCCCACAGACCCATCTATTGTTACATT  
AATAGAGGACTCCAGTGTGGTTACATCAGGTGCACCTAGGCCTACGTTTACTGGCACGTC  
TGGGTTTGATATAACATCTGCGGGTACAACCTACACCTGCGGTTTTGGATATCACACCTTC  
GTCTACCTCTGTGTCTATTTCCACAACCAATTTTACCAATCCTGCATTTTCTGATCCGTC  
CATTATTGAAGTTCACAAACTGGGGAGGTGGCAGGTAATGTATTTGTTGGTACCCCTAC  
ATCTGGAACACATGGGTATGAGGAAATACCTTTACAAACATTTGCTTCTTCTGGTACGGG  
GGAGGAACCCATTAGTAGTATACCCATTGCGCTACTGTGCGGCGTGTAGCAGGTCCCCGCCT  
TTACAGTAGGGCCTACCAACAAGTGTACGCTAGGCTAACCCCTGAGTTTCTTACACGTCCATC  
CTCTTTAATTACATATGACAACCCGGCCTTTGAGCCTGTGGACACTACATTAACATTTGA  
TCCTCGTAGTGATTCTCTGATTGAGATTTTATGGATATTATCCGTCTACATAGGCCTGC  
TTTAACATCCAGGCGTGGGACTGTTTCGCTTTAGTAGATTAGGTCAACGGGCAACTATGTT  
TACCCGCAGCGGTACACAAATAGGTGCTAGGGTTCACTTTTATCATGATATAAGTCCTAT  
TGCACCTTCCCCAGAATATATTGAACTGCAGCCTTTAGTATCTGCCACGGAGGACAATGA  
CTTGTTTGATATATATGCAGATGACATGGACCCTGCAGTGCCTGTACCATCGCGTTCTAC  
TACCTCCTTTGCATTTTTTTAAATATTCGCCCACTATATCTTCTGCCTCTTCCTATAGTAA  
TGTAACGGTCCCTTTAACCTCCTCTTGGGATGTGCCTGTATACACGGGTCCCTGATATTAC  
ATTACCATCTACTACCTCTGTATGGCCCATTTGTATCACCCACGGCCCCCTGCCTCTACACA  
GTATATTGGTATACATGGTACACATTATTATTTGTGGCCATTATATTATTTTATTCCTAA  
GAAACGTAAACGTGTTCCCTATTTTTTTTGCAGATGGCTTTGTGGCGGCCTAGTGACAATA  
CCGTATATCTTCCACCTCCTTCTGTGGCAAGAGTTGTAAATACCGATGATTATGTGACTC  
CCACAAGCATATTTTTATCATGCTGGCAGCTCTAGATTATTAACCTGTTGGTAATCCATATT  
TTAGGGTTCCCTGCAGGTGGTGGCAATAAGCAGGATATTCCCTAAGGTTTCTGCATACCAAT  
ATAGAGTATTTAGGGTGCAGTTACCTGACCCAAATAAATTTGGTTTACCTGATACTAGTA  
TTTATAATCCTGAAACACAACGTTTAGTGTGGGCTGTGCTGGAGTGGAAATTGGCCGTG  
GTCAGCCTTTAGGTGTTGGCCTTAGTGGGCATCCATTTTATAATAAATTAGATGACACTG  
AAAGTTCCCATGCGGCCACGTCTAATGTTTCTGAGGACGTTAGGGACAATGTGTCTGTAG  
ATTATAAGCAGACACAGTTATGTATTTTGGGCTGTGCCCCTGCTATTGGGGAACACTGGG  
CTAAAGGCACTGCTTGTAAATCGCGTCCTTTATCACAGGGCGATTGCCCCCTTTAGAAC  
TTAAAAACACAGTTTTTGAAGATGGTGATATGGTAGATACTGGATATGGTGCCATGGACT  
TTAGTACATTGCAAGATACTAAATGTGAGGTACCATTTGGATATTTGTCAGTCTATTTGTA  
AATATCCTGATTATTTACAAATGTCTGCAGATCCTTATGGGGATTCCATGTTTTTTTTGCT  
TACGGCGTGAGCAGCTTTTTTGCTAGGCATTTTTGGAATAGAGCAGGTACTATGGGTGACA  
CTGTGCCTCAATCCTTATATATTAAAGGCACAGGTATGCCTGCTTCACCTGGCAGCTGTG  
TGTATTCTCCCTCTCCAAGTGGCTCTATTGTTACCTCTGACTCCCAGTTGTTTAATAAAC  
CATATTGGTTACATAAGGCACAGGGTCATAACAATGGTGTGTTGCTGGCATAATCAATTAT  
TTGTTACTGTGGTAGATAACCACTCCCAGTACCAATTTAACAATATGTGCTTCTACACAGT  
CTCCTGTACCTGGGCAATATGATGCTACCAAAATTTAAGCAGTATAGCAGACATGTTGAGG  
AATATGATTGTCAGTTTTATTTTTTTCAGTTGTGTACTATTACTTTAACTGCAGATGTTATGT  
CCTATATTATAGTATGAATAGCAGTATTTTAGAGGATTGGAACCTTGGTGTTCCCCCCC  
CCCCAACTACTAGTTTTGGTGGATACATATCGTTTTTGTACAATCTGTTGCTATTACCTGTC  
AAAAGGATGCTGCACCGGCTGAAAATAAGGATCCCTATGATAAGTTAAAGTTTTTGAATG  
TGGATTTAAAGGAAAAGTTTTCTTTAGACTTAGATCAATATCCCCCTTGGACGTAAATTTT  
TGGTTCAGGCTGGATTGCGTCGCAAGCCCACCATAGGCCCTCGCAAACGTTCTGCTCCAT

CTGCCACTACGTCTTCTAAACCTGCCAAGCGTGTGCGTGTACGTGCCAGGAAGTAATATG  
TGTGTGTGTATATATATATACATCTATTGTTGTGTTTGTATGTCCTGTGTTTGTGTTTGT  
TGTATGATTGCATTGTATGGTATGTATGGTGTGTTGTATGTTGTATGTTACTATATTT  
GTTGGTATGTGGCATTAAATAAAATATGTTTTGTGGTTCTGTGTGTTATGTGGTTGCGCC  
CTAGTGAGTAACAACCTGTATTTGTGTTTGTGGTATGGGTGTTGCTTGTGTTGGGCTATATAT  
TGTCTGTATTTCAAGTTATAAACTGCACACCTTACAGCATCCATTTTATCCTACAATC  
CTCCATTTTGTCTGTGCAACCGATTTCGGTTGCCTTTGGCTTATGTCTGTGGTTTTCTGCA  
CAATACAGTACGCTGGCACTATTGCAAACTTTAATCTTTTGGGCACTGCTCCTACATATT  
TTGAACAATTGGCGCGCCTCTTTGGCGCATATAAGGCGCACCTGGTATTAGTCATTTTCC  
TGTCCAGGTGCGCTACAACAATTGCTTGCACTAATATCCACTCCCTAAGTAATAAAAC  
TGCTTTTAGGCACATATTTTAGTTTGTCTTACTTAAGCTAATTGCATACTTGGCTTGTA  
CAACTACTTTCATGTCCAACATTCTGTCTACCCTTAACATGAACTATAATATGACTAAGC  
TGTGCATACATAGTTTATGCAACCGAAATAGGTTGGGCAGCACATACTATACTTTTC  
>gi|206902429|ref|NC\_011279.1|\_HumanPapillomavirus\_FA75/KI88-  
03,\_complete\_genome  
AACGGTAAGTTTTATTGTTTGAACCGCTGCCGGTTGCTATATTACTCATTTATCTGAT  
TGTGGTTTACAACAACCATTCTTAATTAAATACATGTGACCGCTTGCCTTAGATGTAAA  
CCTATAAAATTACTTGAAGAATATTAGAGACACATATACTGATGGAGAGGCCTAGAACAG  
TACAAGTTCTGAGTCGGCATTTAGAAAATACCAATAGAAGATTTATTGGTACCATGCAAGT  
TTTGTGAGCGCTTTTAAACATATATAGAACCTTTTGAATTTGATTACAAACAATTGCAAC  
TCATTTGGATTGAAGATTAGTGTATGCTCTTTGCTCTAGTTGTGCATATGCATCTGCTG  
CATTTGAATACAAAATTATTTAGAAGGCACAGTCAAAGGCAGAGAAATAGAGCAGGTGA  
CTCAACAGTCTGTAGGCTTTATTACTATCAGATGCATTTATTGTTTAAAGCATCTAGACC  
TTTTAGAAAAGTTAGACAATTGTGCTAGGCATCAGCAGTTTTATAAGGTGAGAGGTAATT  
GGAAGGGATTGTGCAGACATTGTTGGTCGATAGAATGATTGGGAAAGAAGTTACTATTCC  
AGATATTGTTCTGGAAGTGAAGAGCTTGTCCAGCCATTGACCTGCATTGCTACGAAGA  
ATTACCAGAGCTTCCAGATGTTCTAGTGAAGATTCAGAGGAGGAGCAAGTAGAGCGCAT  
CCCATACAAGATAGTTGCTCCTTGTGGTGGTTGTGGCGCTCGCCTTCGACTATTTGTGAT  
TGCTACCTTCTTTGGAATCCGCACACAGCAAGAACTTTTAATTCAAGAAGTCAACTTGT  
GTGTCTCAGTGCCGAGAGGTCATTTCGAATGGCGGACAAGGACCATAAAGGTATTGATG  
CTAAGGAAGGCTGTAGTGATTGGTTTTTAGTAGAAGCTGAATGTTGATAGTACTAGTGATC  
TAGAAAATGATTTAGAAAACCTTATTTAATGAAGGGCAGACTCAGATATTTCTAATTTAA  
TTGATGATGGGGACATTGAACAGGGGAATTCCCGCGAATTGCTATGCCAGCAAGAAGCAG  
AGGAAAGCGAGCAACAGACACAATTGCTAAAACGAAAGTACCTCAGTCTAAAGAGAAAG  
AGATCCTGCAGCTCAGTCCGAGCTGGAGTCAATCTCCCTGTCGCCCCATCATAAATCTA  
AAAAACGGCTGTTTGTGGAGCAAGATAGTGGACTAGAGCTTTCACTAAATGAAGTTGAAG  
ATCTTTCTGAAGAGGTGGAGGTACCGGCGATTACTCCAGCGCCGCGCAGGCGAGGTGGTG  
AGGGAGAGGGAACTTGCATTATAAAGCGCTGTTAAAGTGCAGCAATGCAAAAGCAACAT  
TGTTAAGTAAATTTAAGGATGCGTTTGGAGTGAGTTTTAATGAGCTCACAAAGGCACTATC  
AAAGTAATAAGACATGTTGTAGGGATCGGGTTGTTAGTATTTATGCAGTGAAAGATGATC  
TGTTAGAAGGGTCTAAGCATTATTTACAAAAGCATTGTTTCATATATTTGGATGCATGTTT  
TACAACCAATGTCATTATTTTTACTGTGTTTAAATGCTGGGAAAAGTAGAGAACTGTAT  
TTAGATTACTATCTTCTATTTTGAAGTAAATGAAATCAAACATTGTCTGAACCACCTA  
AGTGGCGTAGTGTAATAGCGGCATTGTATTGGTATAAAGGAAGTATGAATCCAAATATTT  
ATACTTTTGGAACATATCCTGATTGGATAGTGACACAACTATGATTAGCCATCAATCTT  
TGGAGGCCACGCAATTTTCTTATCTGACATGATACAGTGGGCATTTGATAATGATTATA  
TAGACGATGCAGATATAGCTTACAACATATGCTAACTGTCTGATACAAATAGTAATGCAA  
AAGCATTTTGTAGATAGTAATAGTCAAGCAAAGTATGTTAGAGAATGTGCTTTAATGGTTA  
AACATTATAAACGTGGGCAAAATGAGGGAAATGTCAATATCAAGTTGGATTTCATACACGCC  
TTTTTATCAGTAGAAGGAGAAGGTCATTGGTCTCATATTGTAAAATTTATCAGATATCAAA  
ACTTAAATTTTATTATGTTTTTAGATAAAGTTTAGGACATTTTTCAGAAATACACCTAAAA  
GGAATTGCATTTTATTTTCATGGGCCTCCTGATTCAGGGAAATCTATGTTTACAATGTCTT  
TAATTCGTGTGTTAAAAGGAAAAGTGTATCATTTGCTAATTCTAGAAAGTCATTTTGGT  
TGCAACCACTGTCAGATGCTAAAATAGCACTGCTAGACGATGCTACATATGAGTGTTGGA  
ATTATTTTGATACATTCTTAAGAAATGGCATTGATGGAAACCCAGTCAGTCTAGATATAA

AACACAAAGCTCCTTTGCAAATACAATTTCCACCTTTAATGATAACATCTAATATAGATA  
TTAATAAAGAAGATAGATATAGGTATTTGCAAAGTAGAATCATGTCATTTGAATTTCCCTA  
ATAAATTTCTTTTGTAGTAATAATAAACCTCAATTTCTTTTAACTGACCAAAGCTGGA  
AATCTTTTTTTTGAAAGGCTTTGGACACAATTAGAGCTCAGTGATCAAGAAGACGAGGGAG  
AGGATGGAACTCTCAGCGCACGTTTCAATGCACCTGCAAGAGAAGTTAATGGACATTTAT  
GAATCAGGTGTAGAAACGTTGGAAGCACAAATTGAGCACTGGCAATTATTAAGACAAGAG  
CAGGTGCTTTTAAATTATGCAAGGAGGAATGGTGTTATGCGCCTAGGATATCAACCTGTA  
CCAAGTCTAGCAACGTGAGAGACTAAAGCCAAGGATGCAATTCGCATGGTTATACTTTTTA  
CAAAGTTTACAACTTCTGAGTATGCTGATGAACCGTGGAACCTGGTGCAGACTAGCCTT  
GAAACTGTTAGAAGTCCTCCTGAAAATTGTTTTAAAAAGGGACCAAAAAATATTGAGGTT  
ATTTTTGATGGAAATCCTGAAAATCTTATGATTTTATACTGTATGGACATGGATATATTAT  
CAAACTCAGATGATAAGTGGCAAAAGGTAGAAGGTGCTGTGGACTATGAGGGTGCTTAC  
TATACAGAGGGAAAACATAAGCACTACTACCTTAGATTTGAAGCAGATGCTAACAGATTT  
AGCACTACTGGACTGTGGGAAGTGCATGTTAACCAAGATACTGTGTTTACTCCTGTCAC  
AGCTCTTCGCCGCCATCTGGAAGCAGGGTATCCCTTCTGCCCTCCGACACCCACATCCCTC  
CAGCCCTCTTCCAGCGTCTCCACCACACAAAAACGATACGCACGAACCGGATCTAGCCCT  
ACAGCCACCGCCCGGCGGCAGAGGAAAAGAGAAAAGACAAGAAGGAGACGGAGAAGGAACG  
CAGGCGACATCGAGACAACGTGTGTCAGATCAAGATCAAGACGCTCCAGCAGAGGGAGGAG  
CAAGAAACCTCAGTCAAACGAGGAAAGGGCGAGGAGGGTACGAGGGAGAAGAGAA  
CCCACCAACGAGACACCTCCTCCAGGGGAGGGAGAAGTAGAAGGCGGCCCAACACG  
TCCAGGTCCAGATCAAGAGGGTCTTCTAATGAGCGTGGCCTCTTGCCCTCAGAAGTGGGA  
AGATCAGTACAATCAGTTGGTTCAAAACATCTTGGTAGACTTGAGCGATTATTGGAAGAG  
GCTGCAGATCCCCCAGTAATTCTGTTTCGTGGGGAGGCTAATCAGCTTAAATGCTATCGC  
TACAGGGTGCATAAAAGGCATAAGGGTGGCTACAAATATGTCAGTAGTACTTGGTCATGG  
ATCACAGAACATAACAATGACAGAGTGGGACGCGCTCGGATGCTTGTTCTGTTTTCATCA  
ACAGAAACAAAGGGAAGCATTTCTAGACACTATGAAATTACCTCAGGGTGTTGATTGGTCC  
TATGGGAATCTTGATAATTTTTAATTAACCTTACTAATTGCATGCTTTTACA  
CTAATATACTAATCTGCTAATCTGCTATGGCTCGTGCACGCAGAACAAAACGTGCTTCTG  
TTACTGATATTTACAGGGGTGCAAGGCTGCAGGTACTTGCCCTCCTGATGTTGTAAATA  
AAGTTGAACAAAGCACAAATAGCAGATAAAATTTTAAATATGGAAGTGCTGCTGTGTTTT  
TTGGTGGGTGGGAATAAGTACAGGCCGCGGTACTGGTGGCACAACAGGATATGTACCTC  
TTGGAGAAGGCCCTGGGGTGC GCGTTGGTGGTGC GCGCCACAGTGGTACGCCCCGGGGTCA  
TACCTGAAGTTATTGGTCCAACCTGAGTTAATACCTATTGATACAGTCACTCCAATTGACC  
CTACAGCACCTCTGTAGTCACCTTAACCTGACAGCTCTGCTGTTGACCTTTTACCTGGTG  
AAATAGAGACAATTGCAGAAGTGCATCCAGTCCCAGTTCCAAGTGCACCAGAAATTGACA  
CTCCTGTGGTCACTGGCGGGCGAAATTCATCTGCTGTGTTAGAGGTGGCTGATCCTAGTC  
CTCCACACGTACTAGAGTATCTAGAACACAATACCATAACCCATCTTTTCAAATAATAT  
CTGAGTCTACACCAATAGCTGGGGAGTCTTCATTATCAGATCATATATTGGTGTTTGAAA  
ACACAGGGGGTCAAGCTATAGGTGGTACAAGAGAAGAAATTGAACTACAATCATTACCTT  
CCAGGTATAGCTTTGAAATAGAAGAGGCCACTCCTACTCGTCAAACCAGCACACCTATTC  
AAAGAGGTAGGCAAGCTGTTTCTGCTTTACGTAGGGCCTTGTAACAATCGAAGATTAAC  
AACAGATAGCTGTAGAAGACCCTTTATTTTTATCCAAACCATCTAAGCTAGTAAAATTT  
AGTTTGATAATCCTGTATTTGAAGAAGATATTACCCAGATATTTGAAAGGGATATAGAAC  
AAGTTGAAGAACCCTCCTGACAGACAGTTTCTGGATGTAGCAAAATTAGGTAGGCCTACAT  
ATTCTGAAACTCCTCAAGGCTATGTTAGGGTAAGTAGGCTAGGGCGACGCGCTTCCCTAA  
GGACTAGGAGTGGTACTCAGGTTGGTGCACAGGTTCAATTTCTACAGGGACCTTAGTACAA  
TTAACACTGAGGAGCCCATAGAATTACAACCTTTTAGGAGAACATTCTGGGGATTCTACAA  
TTGTACAAGGGCCTGTTGAAAGTACACTTATAGATGTTAATATTAATGAAACACCTAGCC  
TTTTGGAACTTCAGAAATTTAATTCGAAGATTTATTACTTGATGATGCTGTGCAGGACT  
TTAGTGGGCTCAATTAGTGTGTTGGTACATCTAGGAGGTCAACTTCATCTGTTACTGTAC  
CTAGATTCAGTCTCTCTAGGGAAACAAGTTTATATATTCAAGATATTGAAGGTTATAATG  
TAGCTTATCCAGAGTCACGAGAAGTACCTGAAATAATTTATCCACAGCCTGATATTCCAG  
CTGTTGTTATACATATAGCAGATGCTTCTGGGGATTTTTATTTACATCCCAGTTTACAGA  
AACGAAAACGCAAGCGAGCTTATTTATAATTTTTTTTTCAGATGTCTCTCTGGCTTCCTGCA  
AGTGGTAAGGTATATTTGCCACCATCAACTCCAGTAGCTAAGGTGTTAAGCACTGATGAA

TATGTAGAAAGAACTAACATATTTTATCACGCAACTAGTGATCGCCTTTTAACAGTAGGA  
CATCCATATTTTGATGTTACAAATTCTGATGGCTCCAAAATAGAAGTTCCCAAAGTGTCA  
GGAAATCAATTTAGGGCCTTTAGAATGTTATTTCCCTGATCCAAATAGATTTGCATTAGCA  
GATATGTCCATATATAACCCAGAAAAGGAAAGATTGGTTTGGGCTTGTAAGGAATAGAA  
ATTAGCAGAGGTCAGCCTTTAGGTGTAGGTACATGTGGTCATCCATTATTTAATAAAGTG  
AAAGATACAGAAAATAGCAATAGCTATCAGACAGGGTCCACAGATGACAGACAAAATACA  
TCCTTTGATCCTAAACAAGTTCAAATGTTTATTATTGGATGTACACCATGTTTAGGAGAA  
TACTGGGATAAAAGCTGAGCCATGTGAAAATGCAGGAGATCAACAGGGAAAAATGTCCACCT  
ATAGAACTGAAAAATTCTGTGATTCAAGATGGCGATATGATGGACATTGGATTTGGAAAT  
ATAAATTTTAAACTCTATCCCTGAATAGATCAGATGTTAGCTTAGATTTAGTAGACGAA  
ATTGCTAAATATCCAGATTTTCTAACTATGGCAAATGATGTGTATGGAGACTCATGTTTC  
TTTTTTGCAAGAAGGGAACAGTGCTATGCAAGACATTATTTTACCAGAGGAGGTAATGTT  
GGAGACGCTACTCCAGATGGAGCAAATAATCAAGATCATAAATTTTATTTACCTCCTAAG  
TCATCACAAAGTCAAACACTAGGAAATTCATTTTACTTTCTACTGTTAGTGTTCTCTA  
GTCTCTTCAGATGCTCAGTTATTTAATAGGCCCTTTTGGTTACAAAAAGCTCAAGGCCAT  
AACAAATGGTATACATATGGGGAAATCAAATGTTTGTCACTGTTGCTGATAACACTAGAAAC  
ACTAACTTTACCATTGTGTACCTTCAGATAATGGTGCTATAACTGAGTATGATTCTAGC  
AAATTTAGAGAATTTTTAAGGCACGTGGAAGAGTATCAAATATCTGTAATATTACAACGTG  
TGTAAGATATCACTGCAACCTGATGTGCTAGCCAGATCAATGCAATGAATTCAGGTATA  
TTAGAAGATTGGCAGTTAGGATTTGTACCAACTCCTGACAATGCAGTACATGACACCTAT  
AGATTTATAAATTCCTCAGCCACTAAATGTCCAGATAAGGTTTCCTGCAAAAGATAGAGAG  
GATCCATTTGCTCAATATTTCTTTTGGAGAGTAGATATGACTGAAAAATTATCATTAGAT  
TTAGATCAATATCCTTTAGGAAGAAAAGTTTTTGTTCCAAGCAGGATTACAGAACACCAGG  
GTCAAATCATTAAGCGTAGCAGATCTGTTTCTCGGGTACTGCAAAACGACGACGGACA  
TAACGACCGAAATCGGTTTGTATTTAATAAATAAATATTCTAACCAAAATGGTATGTGAA  
GCATTTTTTTAAACCGTCTTCGTGACTAAACCGAACAAGTCAACACCAGCAACCGCGCCCG  
GTATAATCTGCTTATAAATCGCAGCCGGTACTTCACCTTACAAAGACTTGGCAGTCTGTC  
TAGGAACACCGCAGGCGCCCGCCAAGATTCTATTGAAGATATCTTGGCAGAACATCAATT  
TGGCCTCACTTCTACACCGAT

>gi|9627396|ref|NC\_001596.1|\_HumanPapillomavirus\_type\_9,\_complete\_genome

CCGCAGGCAACCGCCAATTTCACTGCCAAGGTTTCGTTGGCAGACCGTCTGGCTTCAAAA  
CGACCGATAACGGTAAGTCTTGGCACGTAGGTGGTTATTTGATCGTTGGGATGATTGTGG  
TTAACAACAATCTACATACACATTTTCATATGACCGCCTTCGTTAATAAGCTTATATAGA  
CATAAATATATAAGGTGCCATGTATTTAACAGAGCAGATTATGGACAGGCCAAAACCTAG  
AACAGTAAAGGAAGTAGCAGACACTCTTGTGATTCCTTTAATAGATTTGTTGATACCTTG  
TAAATTTTGCAATAGATTTTTATCTTATTTTGTAGCTACTTAATTTTGATCACAAGTGTTT  
ACAGCTTATTTGGACAGAGGAGGATTTGGTGTATGGACTCTGTAGTAGCTGTGCTTATGC  
GTCTGCACAGTTAGAATTTACACATTTTTTTCAATTTGCTGTAGTTGGAAAAGATATAGA  
AACTGTAGAAGGAACAGCTATTGGAAATATTTGTATTAGGTGTGCTACTGTTTTAAGTT  
ATTAGACTTAGTGGAGAAGTTAGCTACATGCTATAAGTTTGAGCAGTTTTATAAGGTCAG  
AAACAGCTGGAAAGGATTGTGCAGACACTGTGGGTCGGTAGAATGATTGGGAAAGAAGCT  
ACTATACCAGAGGTGGTTCTAGAACTGCAAGAGCTTGTCCAACCCACTGCTGACCTGCAT  
TGTTACGAAGAATTGACAGAAGAACCTGCAGAGGAGGAGCAGTGTCTCACTCCCTACAAG  
ATCGTAGCTGGCTGTGGTTGCGGTGCAAGACTTCGTTTATACGTGCTTGCTACAAATTTA  
GGAATTCGAGCGCAACAGGAACTTTGTGTTGGTGATATACAACTGGTGTGTCCGGAGTGC  
CGAGGCAGACTTCGCCATGAGTGACAATAAAGGTACTAAATTAGATCCTAAAGAATGCTG  
TAGTGCTTGGTTATCGTTAGAAGCAGAATGCTCTGATTCTAGTTTAGATGGTGATTGGA  
AAAATTATTTGACGAAGGGACAGACTCTGATATTTTCAGACCTAATAGATGATGGAGATGC  
TGTACAGGGAAACTCCCGCAACTGTTTTGCCAGCAAGAGAGTGAGGAAAGCGAGCAACA  
AACACAATGTCTAAACGAAAGTATATCAGTCCCCAAGCTGTTTTGCAGCTTAGCCCTCA  
ACTGGAGTCTATCTCTTTGTGCGCTCAGCATAAACCTAAAGGAGATTATTTGAACAAGA  
CAGCGGACTAGAATGTTCTGTAAATGAAGCTGAAGATCTTTCTGAAAACACAGGTGGAAGA  
GGTACCGCCAATCCACCAACAACAGCTCAGGGAACCTAAGGGCTTGGAATTTGTTAAAGA  
TTTACTTAAACATAGCAATGTGAAAGCTGTATTAATGGCTAAGTTTAAAGAGGCGTTTGG  
TGTGGGGTTTGTGAGCTAACAAGACAATATAAAGTAACAAAACATGCTGTAGAGATTG

GGTAATTGCTGTGTATGCTGTGAATGATGACTTAATTGAAAGCTCTAAACAATTGTTATT  
GCAGCATTGTGCTTATATTTGGCTACATTATATGCCACCAATGTGTTTATATTTATTATG  
TTTTAACGTAGGCAAAAGTAGAGAACTGTATGTAGACTATTAAGCACTTGCTGCAAGT  
ATCTGAAGTGAATTATTAAGTGAGCCTCCAAAGTTGCGAAGTGTGTGTGCTGCATTATT  
TTGGTATAAAGGAAGTATGAACCCTAATGTATACGCACATGGTGCGTATCCTGAATGGAT  
ACTTACACAAACACTAATTAATCACCAATCTGCAAATGCTACACAATTTGACTTATCGAC  
AATGATACAATTTGCCTATGATCATGAATATTTTGATGAAGCTACCATTGCATATCAATA  
TGCAAAGCTGGCTGAAACAGATGCTAATGCCAGGGCTTTTTTACAAAAGTAACAGTCAAGC  
CAGACTAGTAAAAGAATGTGCAACCATGGTGAGACATTACATGAGGGGAGAGATGAAAGA  
AATGAGTATGTCCACATGGATACATAGAAAACCTGCTTACAGTGGAAGCAATGGGCAATG  
GTCAGATATAGTACGGTTTATTAGATACCAGGATATTAATTTTATTGAATTTCTAACAGT  
ATTTAAAGCATTTCTGCAAAACAAACCAAGCAAACTGTTTATTATTTTCATGGACCACC  
TGACACGGGAAAATCAATGTTTACAATGTCACATAATCTGTGTGTTAAAGGAAAGGTACT  
GTCATTTGCCAATTGCAAAAGTACTTTTTGGCTACAACCTATAGCTGATACTAACTTGC  
TTTAATTGATGATGTAACACATGTGTGTGTTGGGAATATATAGATCAGTACTTAAGGAATGG  
ATTGGATGGCAATTATGTATGTTTAGATATGAAACATAGAGCACCTTGTCAAATGAAATT  
TCCACCCCTTATGTTAACGTCTAACATAGATATTACTAAAGACCAAAAGTACAAATATTT  
GCACAGCAGAGTTAAATCCTTTGCTTTCAATAACAAATTTCCACTTGATGCTAATCACAA  
ACCAGATTTGAACTTACTGACCAAGCTGGAAATCTTTTTTTAAAGGCTTTGGACACA  
GTTAGACTGTGAGTATCAAGAAGACGAGGAGGATGGAACTCTCAGCGCACGTTTCA  
ATGCACTGCAAGAGACTTTAATGGACCTGTATGAATCAGGTCGAGAGGATCTACAAAGTC  
AGATTGACCCTGGCAGACTTTAAGACAAGAGCAAATACTTTTGCATTATGCCAGGAAAA  
ATGGAGTTATGCGATTGGGGTACCAACCTGTACCTCCGTTGGCTACCAGTGAACAGAAAG  
CTAAAGATGCTATTGGCATGGTTTTACTATTGCAAAGCCTTCAAAGATCAGCTTATGGAC  
AGGAACCTTGGACACTGGCACAACCTAGTCTTGAGGCGGTACGCAGTCCACCTGCATATG  
CCTTTAAAAAGGGTCCACAAAATATTGAAGTAGTTTATGATGGAGATCCTGATAATGTTA  
TGAGCTATACTATATGGAACCTTATATATTATCAGACTGTTAATGATACTTGGGAAAAAG  
TTCAAGGTCACGTGGATTATTTTGGAGCCTATTACTTTGAAGGGACTGTAAAAACATATT  
ATATTAACCTTTGACAAAGATGCAGCCAGGTATGGCAGAACTGGCGTTTGGGAAGTGCATG  
TTAACAAGGACATTGTGTTTGGCCCTGTACTAGCTCTTCGCCACCAACTGGAGACGGGG  
GAGAGACCTCCAAGCACACCCTTTCCAGGTCGGGGTCGCCAACAACATCGCGACTCCCTG  
CCACCACCGTGCCACCGGAGGATCCAGGACATCATCCCGACGATACCAACGAAAAGCCT  
CTAGCCCCACCACCAGGAAGAAAAGACAGAGACAAGGAGAAGGAGAAGGAGAAGGAGAAG  
GAGAAGAAACCACTACAGGAGACAAAGGTCCAGATCCAAGGGTCGAACAGAAACCGAAA  
GGGGAGGGGAGCGACGGAGACGAGGAAGGTCCCTCCTCCGCAGACTCCACTACCCCCACCG  
ACAGGCGAAGGGGAAGGGGAGGTGGAAGGGGGCCACGACCAGGTCCCAGTCCCGTTCCC  
GTTCCCGCTCCCCTCCCGGTGCGCGTCCCGAGGAGGGACTGCTTCCAGGGTTGGCGTCT  
CGCCTGATGAAGTGGGAACACGAGTTCGATCAGTTGGTGCAGGACATCACGGGAGACTTG  
CACGATTACTGGCTGAGGCTAAAGACCCCCCATTAATGCTGTTGCGTGGCGACGCCAATG  
TGCTTAAGTGCTATCGCTTTTCGGGAACGCAAAAAAAAAAGAGGCTTAGTAAAATATTATA  
GTACTACGTGGTCATGGGTAGGGGAAGACAGTTGTGATAGAGTTGGAAGAGCGCGAATGA  
TTTTAGCCTTTGACACATATGAGCACAGACAACAATTCATTAGGACTATGAAATTACCAC  
CTACAGTAGATTGGTCTTTAGGAAATGTTGATGATCTGTAAGCTTTACTAACGCTAACGC  
TGGCATTGCTACTAACCATACTAACTAACAAACCCATACTAATAACATGGTTTCGTGCA  
AAACGTACTAAACGTGCCTCTGTTACAGATATATACAGAGGCTGCAAAGCTGCTGGTACA  
TGTCCACCAGATGTAATTAATAAAGTGGAGCACACAACCTATTGCTGATAAAATTTTGCAA  
TATGGAAGTGCTGGTGTGTTTTTCGGGGGCTTGGGAATAAGTACAGGCCGTGGCACTGGT  
GGTGCCACTGGCTATGTTCCATTAGGGGAAGGGCCAGGAGTCCGTGTAGGTGGCACCCCC  
ACTATAGTTGCGCCCTGGGGTGATACCTGAAATAATTGGCCCAACTGATCTAATTCCTTTA  
GACACAGTCAGACCAATTGACCCACAGACCCAGTATTGTACAGGCACCTGACAGCACT  
GTTGACCTTTTACCCTGGTGAAATAGAATCAATTGCTGAGATACACCCAGTACCAGTGGAC  
AATGCTGTAGTAGATACTCCAGTTGTAACAGAAGGTAGAAGAGGCTCGTCTGCCATTTTA  
GAGGTGGCTGACCCAAGCCCTCCTATGCGAACCCGTGTTGCACGAACTCAATACCATAAT  
CCAGCTTTTCAAATTATTTCTGAGTCTACACCTATGTCAGGTGAATCTTCCTTAGCAGAT  
CATATTATAGTTTTTTGAAGGATCTGGGGGCCAGCTAGTAGGTGGTCCTAGGGAATCATAC

ACAGCATCTTCTGAAAACATAGAATTACAAGAATTTCCCTAGTAGATATAGTTTTGAAATA  
GATGAAGGAACACCTCCTCGGACTAGTACACCTGTCCAAAGAGCAGTACAATCATTATCT  
AGTCTGCGTAGAGCTCTATATAACAGACGTCTTACAGAACAAGTGGCTGTGACAGATCCA  
TTATTTTTTAAGTAGGCCTTCTCGTTTAGTTCAATTTTCAGTTTGATAATCCAGCATTTGAA  
GATGAGGTCACACAAATATTTGAAAGAGATCTAAGTACTGTTGAGGAGCCTCCAGATAGG  
CAATTTTTTAGATGTACAACGCCTTAGTAGGCCCTTTATATACAGAAACACCTCAGGGATAT  
GTTTCGGGTAGTAGACTAGGCCGAAGAGCAACAATCCGCACACGTAGTGGTGCACAGGTG  
GGCGCACAGGTTTCATTTCTACAGGGACTTAAGCACCATTAACACAGAAAGAACCTATAGAA  
ATGCAATTATTGGGGGAACACTCAGGTGACAGTACCATAGTACAAGGCCCAGTTGAAAGT  
TCAATTGTTGATGTTAATATTGATGAACCTGATGGTTTGGAGGTGGGAAGACAGGAAACC  
CCTTCTGTTGAAGATGTGGATTTTAATTCTGAAGACTTACTGTTAGATGAGGGTGTAGAA  
GATTTTAGTGGGTCTCAGCTAGTCGTTGGCACACGCCGACAGTACAAATACATTAACAGTG  
CCACGCTTTGAACTCCAAGGGACACTAGTTTTTATATTTCAGGATATACAAGGCTACACA  
GTGTCCTATCCCGAGTCTAGACAAACCACAGATATAATTTTTCCACATCCTGACACCCCC  
ACAGTAGTAATCCACATCAATGATACATCAGGAGATTATTATTTACACCCAAGTCTCCAA  
AGGAAAAAACGCAAACGCAAATATTTATAATTTTGTTTTTGCAGATGTCATTGTGGCTTC  
CAGCAAGTGGTAAGGTATATTTGCCACCAGCAACACCAGTGGCGAGAGTTCAAAGCACCG  
ATGAATATGTGGAAAGAACAATATTTTTTATCATGCAATTAGTGACCGTTTGCTAACAG  
TGGGTATCCATATTATGATGTCCGCTCAGGCGACGGACAAAGGATTGAAGTCCCTAAAG  
TGTCTGGTAATCAGTATCGGGCCTTTAGAATTAGCTTACCTGATCCAAATAGGTTTGCTT  
TAGCAGATATGTCAGTTTTATAATCCTGATAAGGAACGTCTAGTTTGGGCCTGTAGAGGTA  
TTGAAATAGGCAGAGGACAACCTTTAGGGGTGGGAACATCAGGTCACCCATTATTTAATA  
AGGTTAGAGACACAGAAAACCTCTAGCAATTATCAAGGCACAACAATGGATGACAGGCAAA  
ACACATCTTTTGACCCCAAACAGGTACAAATGTTTCATTATAGGATGTATTCCATGCTTAG  
GAGAACACTGGGATAAAGCCAAAGTGTGTGAAAAGGATGCTAATAATCAACTAGGCTTAT  
GTCCTCCTATAGAATTAAGAAACACAGTAATTGAGGATGGGGACATGTTTGATATTGGAT  
TTGGAAATATCAACAATAAGGAACTGTCCTTTAATAAGTCTGATGTAAGCTTAGATATTG  
TTGATGAAACCTGCAAATATCCAGACTTTCTAACAATGGCAAATGATGTTTATGGAGATG  
CATGTTTCTTTTTTGCAAGAAGAGAACAATGTTATGCCAGGCATTATTATGTTAGAGGAG  
GTTTCAGTTGGTGACGCTGTTCTGATGGTGCAGTAAACCAGGATCATAATTTCTTTTTGC  
CAGCAAAAAGTGATCAACAACAACGAACAATAGCTAATTCACCTACTATCCTACAGTAA  
GTGGGTCAATTAGTAACCTCAGATGCTCAATTGTTTAATAGGCCATTTTGGCTCCAAAGAG  
CACAAGGTCAACAACAATGGCATTATTTATGGGGTAATCAGATATTTGTTACAGTGGCAGACA  
ATACACGTAACACCAATTTTACCATTAGTGTGTCTACAGAGGCAGCTCAAACAGAAGAAT  
ATAATGCCAATAATATTAGAGAATATTTAAGACATGTTGAAGAATATCAGATTTTCATTAA  
TCTTACAGTTGTGTAAAGTGCCTTTAGTAGCTGAAGTATTATCCAGATAAATGCAATGA  
ACTCAGGTATTTTAGAGGATTGGCAATTAGGGTTTGTTCCAACTCCTGAAAATGCTGTTT  
ATGATATCTACAGATATATTGATTCAAAAAGCCACAAAATGCCCAGATGCTGTTGAGCCTA  
CAGAAAAAGAGATCCCTTTGCCAAATACTCATTTTGGAAAGTGGATCTAACTGAAAGAT  
TATCGTTGGATCTTGATCAATATCCTTTAGGTAGAAAATTTCTTTTTCAAGCTGGTTTGC  
AAACACGAAAACGTCTATTAAAACATCTGTTAAAACATCTAAAAATGCTAAGAGAAGGC  
GAACCTAACCGATATCGGTTTCCAATAAAATTTAAGTTATCCAATTTGGTATGTGAAGCA  
TTTTTTAACCATCTTCGTGACTAAACCGTACAAGTCAACACAGAGCGACCGCACCCGGTT  
TATCTGATTATAAAGTGCACCTGGTGCAATTTGAACAATACTATCGTGGAATCA  
>gi|186461202|gb|EU410349.1|\_HumanPapillomavirus\_type\_111,\_complete\_genome  
AACGGTAAGCTTTGGCACGTAGGTGGTGGTTGATCGTAAGAGTGATTGTGGTTAACAAC  
AATCAGAGTTTACACTTACATGTGACCGCTTGCGTTTTCTTTTACATATATACATAAATA  
TACACCTATGGTTGTATTTAATAGGGAGAGCTCAATGGATAGGCCAAAGCCTAGGACAG  
TAAAGAACTAGCAGACACACTAGCAATTCTGTAATAGATTTATTATTACCATGCAACT  
TTTGCAATAGATTTCTTACTTTGAGTTGCTGAGTTTTGATTATAAGTATTTGCAAC  
TGATATGGACTGTTGAAGACTTAGTATATGCTATATGTAGTAGTTGTGCTTTTGCTTCAG  
CACAGTTTGAATTTATGAAATATTTTTGAATACTCTGTTGTAGGAAAAACAGATAGAACTG  
TAGCAAAACCAGCCTATTGGAAATATTACTGTTAGGTGTCAATATTGTTTAAAAAATTGG  
ATCTGGTAGAGAAGCTAGGAGTGTGCTACAAACAACAATATTTTCATAGAGTTAGGGATA  
ATTGGAAAGGATTGTGCAGACATTGTGGTTCGATAGAATGATTGGGAAACAACCCACTAT



ACCAGACGTAGTTCTTGAGCTGCAAGAGCTTGTCCAACCCACTGACCTGCATTGCTACGA  
AGAATTGACAGAAGAGCCTGCAGAGGAGGAGCAGTGCCTCACTCCTTACAAAATTGTAGT  
TGCTTGCAATTGTGGTACAAGACTTCGCTTATACGTCTTTGCTACGGAACCTGGAATAAG  
AGCCCAACAAGAACTATTACTGGGTGAAGTACAGCTTGTGTGTCCAGAGTGCCGCGAGAG  
TCTTCGCCATGAGTGATGATAAAGGTACTAAATATGATGCTAAAGAAGGATGTAGTGAAT  
GGTTGTCTTTAGAAAGCAGAATGCTCTGATTCTAGTTTAGATGGTGATTTGGAAAACTGT  
TTGACGAAGGGACAGACTCTGATAATTCAGACTTTTATAGATGATGGAGATGCTATTCAGG  
GAAACTCCCCGCGAACTGTTTTGCCAGCAAGAGTGTGAGGAAAGCGAACAGCAAACACAAT  
TGCTAAAAACGAAAGTATATCAGTCCTACAGCTGTTTTGCAGCTTAGTCCTCAATTGGAGT  
CTATCTCTTTGTCACCACAGCATAAACTAAGAGGAGATTATTTGAACAAGACAGCGGAC  
TAGAGAGTTCAATAAATGAAGCTGAAGATCATTTCTCAAACACAGGTGGAAGAGGTACCAG  
CCATTGTTCCACCAACAACAGCTCAGGGAACCTAAGGGTTTGGAGATTGTAAAAGAATTAC  
TTAAATCTAATAATGTGAAAGCTGTGTTACTGGCTAAATTTAAAGAGGCATTTGGAGTTG  
GGTTTATGGAACCTTACAAGACAATATAAAAGTAATAAAACATGTTGTAGAGATTGGGTAA  
TTAGTATTTATGCAGCTAATGGCGATCTTGTAAGAAGGTTCTAAGCAATTGTTGATACAGC  
ACTGTGGTTATATTTGGTTACAACAAATGCCTCCTATGTGTTTATATTTACTGTGTTTTA  
ATGTTGGTAAAAGTAGAGAACTGTACTACGATTATTAAGCACAAATATTACAAGTATCAG  
AAGTGCAGGTATTGGCAGATCCTCCTAAATTGCGCAGCGTGTTGGCTGCACTGTTTTGGT  
ACAAAGGAAGTATGAATCCTAATGTGTATGCTCACGGTACATACCCAGATTGGATATTAG  
CACAACAATGATCAATCAATCAAAATGCTGTACTCAATTTGATTTATCCACCATGA  
TACAATTTGCTTATGATAATCAATATGTAGAAGAAGCAATAATTGCCTATCAGTATGCCA  
AACTAGCAGATACAGATGCAAAATGCTAGAGCATTTCTACAAAGTAATAGCCAAGCTAGAA  
TTGTCAGGGAATGTGCTACTATGGTAAGACATTATATTCGAGGGGAGATGCGAGAGATGA  
GTATGTCAACTTGGATTACAAAACAATTATTTGTCTGTGGAAGGGGAAGGGCATTGGTCAA  
ATATTGTGAAATTCGTTAGATATCAAGGAATAAATTTTATAGATTTTCTTTCTGTATTTA  
CTAAGTTTTTACATAATAGGCCTAAGCAAACTGCATATTGCTTCATGGACCACCAGATA  
CTGGTAAATCTATGTTTACCATGTCTCTCATTAATGTTCTTAAAGGTAAAGTGCTCTCTT  
TTGCAAAATGTAGAAGTACTTTCTGGCTGCAACCACTTATTGAAGCTAAAATTGCATTAA  
TTGATGATGTGACAGATGTATGTTGGGATTATATTGATAATTATTTGCGTAATGGATTAG  
ATGGCAATGTTGTCTGTTTAGACATAAAACATAGAGCACCTTGTCAAGTAAAATTTCCCC  
CACTATTATTAACATCAAACATAGATATATCCAAGGAGCAGAAGCATAAAATATTTACATA  
GCAGAATTAATGCTTTGCTTTTACTAACAAGTTCCCCCTTTGATGCTGACCATAAACCAC  
AGTTTGAACCTACTGACCAAAGCTGGAATCTTTTTTTTGAAGGCTTTGGACACAGTTAG  
AGCTCTGATCAAGAAGACGAGGGAGAGGATGGAAACACTCAGCGAACGTTTCAATGCACT  
GCAAGAGACTTTAATGGGCCTGTATGAATCAGGTCGTGAGGATCTACAAAGTCAGATTGA  
ACATTGGCAAGCATTGAGACAAGAGCAAGTTTTATTGTACTTTGCTCGAAAAAATGGAGT  
CATGCGCATAGGGTATCGACCCGTGCCTCCTTTAGCCACCAGTGAAAGTAAAGCTAAAGA  
CGCAATTGGCATGGTTATTTTGTGTCAAAAGCCTCCAAAAATCTAAATATGGCCAGGAGCC  
TTGGACACTTGTACAACTAGTCTTGAGACTGTCCGCAGCCCCCTGCAAAATTGTTTTAA  
AAAAGGGCCTTACAATATTGAAGTAATCTTTGATGGCGATCCAGAGAATCTAATGAGCTA  
TACAGTATGGAAAGATATATATTATCAAACTGTGACTGACTCTTGGGAAAAAGTAGAAGG  
CCAAGTGGATTATTTTCGGAGCCTTTTATTTTGAAGGGGCTTTGAAAACTTATTATATTGA  
CTTTGAAAGTGATGCAGCCAGATATAGCACAACTGGCAAATGGGAAGTACATGTTAACAA  
GAATGTTATGTTTGGCCCTGTCACTAGTTTTTCGCCACCTCCTGGAGACGGGGCCAGTGG  
AGAGGCCTCCGGCAACACCTCATCCAGGCCGCAATCACCAGCGCGGGTCCCTCCACCTT  
GTCCTCCCAACGGCCACTCACCAGAACATCCCGACGATACAGAAGAAAAGCCTCTAGCCC  
CACCACCACGCGGCAAGAAAGACAAAGAAAAAGACAAAAAGCCATTACAAGGAAATCAAG  
GTCCAGATCAAGGGGTGCAACAGAAACCCACCGGGGAGGGCGAGGTGGAAGGGCATCCTC  
CGCAGACTCCGACAGCTCCACCAACGGGACGCGGGGAAGGGGAGGAGGAAAGGGGCCAC  
CACAAGATCCCAATCCCGTTCCCGATCCCGGTCCCGGTGCGAGTCCCACACCCGAAGGGC  
TACTTCCAGCACTGGCGTCTCGCCTGCTGATGTGGGATCAGGAGTTTCGATCGGTTGGTCC  
AGAACATCACGGACGACTTGACAGGTTATTGGCAGAGGCTAAAGACCCTCCAGTAGTAAT  
ATTGCGTGAGATGCTAATGTGCTAAAAATGCTATCGCTTCAGAGCTCGCAAAAAACATCA  
AGGTTTAGTTAAATATTATAGTACAACATGGTTCATGGGTAGGTGGGGACTGCTGTGATAG  
AGTAGGCAGATCTAGAATGCTTTTAGCTTTTGATACATACAAACATCGAGAACAGTTTAT

CACTACTATGAAATTACCACCTAAGGTAGACTGGTCATTTGGACATTTAGATGATTTATA  
ATTTACTTACTAACTTATGCATTGCTACTAACACACTAACAAATAATGGCTAGGGCAAAA  
CGTGTA AACGTGCCTCTGTCACTGATATATACAGAGGTTGCAAAGCAGCTGGTACCTGT  
CCTCCAGATGTACTTAATAAAGTGGAAACAACTACTATAGCAGATCAAATTTTAAAATAT  
GGAAGTGCTGGTGTTTTTTTTTGGTGGGTTGGGAATAAGCACAGGGCGTGGTACCGGTGGT  
ACCACAGGATATGTCCCTTTGGGTGAAGGCCAGGAGTACGCATAGGTGGAACCTCCACT  
GTGGTTTCGCCCTGGGGTCATTCCAGAGGTAATAGGCCCTGCAGAGTTAATACCTATAGAC  
ACAGTCAGACCCATTGACCCTACAGCTCCAAGTATTGTCACTGGTGTCGACACCACAGTT  
GACCTTTTACCTGGTGAAATAGAATCTATTGCTGAGATACACCCAGTACCTATAGATAAT  
GTAGAAATAGATACACCAGTTGTTACAGGAGGACGGGGCTCTTCAGCCATTTTAGAAGTG  
GCTGATCCCAGTCCTCCTGTGCGAACCCGTGTTACACGAACACAGTATCATAACCCTTCC  
TTTCAAATTATCTCTGAATCAACACCAACAAGTGGAGAATCGTCTTTAGCAGACCATGTT  
ATTGTGTTTGAAGGCTCTGGAGGACAGTTGGTTGGAGGTGCTCGAGAACCCCTCATAGTT  
ACTGAAACTATAGAAGTGAAGAATTACCTTCTAGATACAGTTTTGAAATCGATGAAGGT  
ACCCACCTCGTACCAGTACTCCTGTGCAACGAGCAGTGCAATCACTTAGTACTTTAAGA  
AGAGCACTGTACAATAGACGTTTGACAGAGCAGGTAGCTGTAACCTGACCCTTTATTCTTA  
ACAAAACCTTCACGTCTTGTACACTTTCAGTTTGATAATCCTGCATTTGAAGAAGAAGTT  
ACCCAAATATTTGAAAGGGATGTGGATCAAATTGAAAGAACCTGATAGACAGTTTTTG  
GATGTAGCAAAATTAAGTAGGCCCTTATATACTGAAACACCTCAAGGATATGTTAGAGTT  
AGTAGACTGGGTGCGACAGCCTCCATACGCAGCGTAGTGGAGCAGAGGTGGGAGCTCAA  
GTACATTTTTACAGGGATTTAAGTAGCATTAACACTGAAGCACCAATAGAAATGGAATTA  
TTAGGTGAACATTTCTGGAGATAGCACTATTTTTCAAGGACCAGTAGAGAGTTCTTTAGTA  
GATGTTAATATTGATGAACCTGACGCCTTGGTTGTAGGCAGACCGGAAACCCCTCCATTA  
GAAGATGAAATAGATTTTAATTCAGAAAGATTTGTTATTGGAGGAAGGGGTAGAAGATTTT  
AGTGGCTCACAACTTGTAGTAGGTACTAGGCGAAGCACAAATACATTAACAGTTCCCCGC  
TTTGAAACACCTCGTGACACTAGTTTTTATATACAGGACTTTTCAGGGCTATACAGTCTCA  
TACCCAGAATCTAGAAACACTGAAAATATTATTTTTCTCATCCAGAAGCTCCCACAGTT  
GTGATTCACATATCAGATACTTCTGGTGATTATTATTTACATCCTAGTTTACAAAAACGA  
AAACGTAAGCGCAAACGAAAATATCTATAATTTCTTTGCAGATGTCATTGTGGCTGCCTG  
CAAGCGGTAAAGGTATATTTGCCACCATCTACACCAGTGGCTCGCGTACAAAGCACCGATG  
AATATGTGGAAGAACCAATATTTTTTACCATGCAGTTAGTGATCGTCTGCTGACAGTGG  
GGCATCCATATTTTGATGTTTCGCTCCACTGATGGGCAACGCATTGAGGTTCCCTAAAGTAT  
CAGGCAATCAATATAGGGCCTTTAGAATAACACTACCAGATCCCAATCGTTTTGCCTTAG  
CTGATATGTCTGTATATAACCCTGAAAAAGAAAGGTTAGTATGGGCCTGCAGAGGTCTTG  
AAATAGGACGTGGTCAACCACTAGGTGTAGGTACATCAGGACATCCATTATTTAATAAGG  
TTCGTGACACTGAAAATTCAGTAATTATCAAGCTGTGACACAAGATGATAGACAAAATA  
CCTCATTTGATCCTAAGCAAGTACAAATGTTTATAATAGGATGTGTTCCCTGTATGGGAG  
AATACTGGGACAAAGCAAAACCCCTGTGATGATGCAGGAAACCAGCAAGGCTTATGCCCCG  
CAATTGAATTAAAGAATTCTGTAATAGAGGATGGAGACATGTTTGATATAGGATTTGGTA  
ATATCAATAATAAGGAATTATCTTTTAATAAGTCAGATGTTAGTTTAGATATTGTCAATG  
AAGTATGTAAATACCCTGACTTCCTAACTATGGCTAATGACGTCTATGGGGACGCTTGTT  
TCTTTTTTGCCAGAAGGGAGCAATGTTATGCCAGACATTACTTTGTTAGAGGAGGCAATG  
TAGGAGATGCAATTCAGATGCAGCAGTGCAACAAAATCACAATTATTATCTGCCAGCAC  
AGGGTAATCAACAACAAAACATTTTGGGTAACTCCATTTATTATCCTACTGTTAGTGGTT  
CTCTTGTTACTTCAGATGCGCAGCTATTTAATAGACCATTTTGGTTGCAACGTGCACAAG  
GCCACAACAATGGTATTTTATGGGGAAATCAAATGTTTATAACAGTAGCAGATAATACCA  
GAAACACTAATTTTACTATAAGCGTATCCACAGAAGCTAATGCACAGCAATATAATGCTA  
GTAATATTAGAGAATATTAAAGACATGTAGAAGAATATCAATTGTCTTTGATTCTTCAAC  
TATGTATAAGTTTCTTTAGTTCCAGAAGTTTATCTCAAATCAATGCAATGAATTCGAATA  
TTTTGGAAGATTGGCAATTTGGGATTTGTACCAACACCAGATAATTCTGTGCATGACACAT  
ATAGATATATTAATTCAAAGGCTACTAAATGTCCAGATGCTGTAGAACCCTAAAGAGAGAG  
AAGATCCATTTGCTAAATATACATTTTGGAAATGTAGATTTATCAGACAAACTGTCCCTTAG  
ATTTAGATCAATACCCTCTAGGGCGCAAAATTTTTATTCCAGGCTGGTTTACAAACACGAA  
AACGGACTTTAAAACCTTCGTCTGTGAAATCTACTAAATCTGCAAAACGCAGACGCACCT  
AACCGATTTCGGTTTTTCAATAAAATGTAAGTAATCCATATTGGTATGTGAAGCATTTTTT

TAACCATCTTCGTGACTAAACCGTACAAGTCAACACAGGGCAACCGCGCCCGGTTTTATC  
TGATTATAAACCGCACCAGGTGCAGTTTTAAACAATGCTATCGTGGAATCACCGGAGGCG  
CCCGCCACTTTGACTGCCAAGTTTTACTTGGCTGTACACCGATTTGGCTTCAACTGCGAC  
CGAT

>gi|186461194|gb|EU410348.1|\_HumanPapillomavirus\_type\_110,\_complete\_genome

AACGGTAAGATTTTTATCTATTAACCGTAGGCGTTACTTTCTGATTGGTAAGACTGATTG  
TAGTTAAACAACAATCTTGATTTATAGCTACATGTAACCGCATGCGTTACAATTTAGGTAC  
ATCTACATAAAATATATTTCTCACACCTATCACATACTATTTAAGAGGTTAGATGGCCAGG  
CCAAAGCCTTTGACAGTACAACAGCTTGCAGATACATTATGCATTCCCTGTTTTAGACATA  
TTAATACCGTGTAAGATTTTGTACTAGGTTTTTATCATATATAGAATTATTAGGTTTTGAT  
TATAAAGGGTTACAACCTATTTGGACTGAGGAAGATTTTGTGTTTTGCATGCTGTAGTAGT  
TGTGCTCATGCTACAGCGCAATATGAATTTACAAGGTTTTATGAACATTCTGTAAATGGA  
CGTGAAATAGAAATAGTAGAGCAAAAAGGAATTGGGGAAGTGGTTGTGCGTTGCCAATAT  
TGTTTTAAACGCTCTAGATCTAATAGAGAAGCTAGAAGTTTGTGTAAGCATCAGCAATTT  
CATAGGGTAAGAGGCAATTGGAAAGGAGTGTGCAGACATTGTGGGTCGATAGGATGATTG  
GGAAACAAGCTACTATACCAGACATTGTTCTGGAATTGCAAGAGCTTGTTTCAGCCCACTG  
CTGACCTGCATTGCTACGAGGAGTTAACTGAAGAAGAAACAGAGGAGGAGTCACGTCATA  
CACCTTACAAGATTGTTGCTGCTTGTGGCCTTTGTGGTGCAGGACTTCGGCTTTTTGTGC  
TTGTGTCAGAGTTTTTGGAAATTCGTACTCAGCAAGAAATTTTGTGTTGGTGAAGTACAGCTGC  
TGTGTCCAGAGTGTGCGGAGAGCTTCGCCATGAGTAACGATAAAGGTACAGAAAATGAT  
GCCAAACAAGGATGTAGTGATTGGTTTTTAGAGGAAGCAGAGTGCTCTGATGCTAGTTTA  
GATGGTGATTTGGAAAAGTTATTTGAAGAAGGTGCAGATACAGACATTTCTGATTTTATA  
GATGATGAAAACACTATTCAGGGAAAACCTCCCGCGAATTGTTATGCCTGCAGGAAAGCGAG  
GAGAGCGAGCAACAGATACAATTGCTAAAACGAAAGTATTTTCAGTTTACAAGAGGTTTTG  
CAGCTTAGCCACGACTGCAGTCTATCAGTATATCGCCACAGCATAAAATCTAAAAGGAGA  
TTATTTGAACAAGACAGCGGACTAGATCTTTCTCTAAATGAAGCTGAAGATAATTCTCAG  
ACATTGGAGGTGGCGGAGGTACCGGCGTCCATAGTTGCGCCGGCAGCTCAAAGTGCTGAG  
GGTTTGGGTATTGTTAAAGACTTACTTAAATGCAGCAATGTAAAGGCTGTATTATTGGCC  
AAATTTAAGGAATCATTTGGTGTAGGATTTATGGAATTGACAAGACAATATAAAAGTAAT  
AAGACTTGTTGTAGAGACTGGGTAGTTACAGCTTATGCTGTGAAGGATGAACTAATAGAA  
AGCTCTAAACAATTGCTTCTGCAGCATTGTGCTTATATATGGCTACAAAATATGCCACCT  
ATGACTTTATATTTATTGTGTTTTAATGTAGGTAAGAGCAGAGACACTGTTTGTAGATTG  
CTAATGAGTCTCTTGCAAATTGGAGAGATTCAATTAATAGCTGAGCCACCAAAGTTAAGA  
AGTGTATTGGCAGCACTATTTTGGTATAAAGGAAGCATGAATCCTAATGTATATGCTCAT  
GGTGAATATCCAGAGTGGATAATGGCACAAACTATGATAAATCATCAAACTGCAGACGCT  
ACTCAATTTGATTTGTCTAGTATGATACAATTTGCTTATGATAATGAATATTTAAATGAA  
GATGAAATAGCATACCATTATGCTAAATTGGCTGATACAGACGCAAATGCTAGAGCTTTT  
CTGCAACATAATAGCCAAGCTCGTTTTGTTAGAGAATGTGCTATTATGGTGAGACATTAT  
AAACGTGGTGAAATGAAAGAAATGTCAATGTCTACCTGGATACATAGAAAATTACTAACA  
GTAGAAGGCGAAGGTCATTGGTCGCATATAGTTAAATTTTACGGTTTCAGGAAATTAAT  
TTTATTTACTTTCTTGATGTATTTAAAGCTTTTTTGCATAATACTCCTAAACAAAATTGT  
ATACTAATACATGGACCTCCAGACACAGGAAAGTCTATGTTTACTATGTCTTTATTAAGA  
GTACTGAAAGGTAAAGTGTTATCATTTGTAAATTGTAAAAGTACATTTTGGTTGCAACCT  
GTAGCAGACACAAAACCTTGCAATTGATAGATGATGTTACAGATGTATGTTGGGACTATATA  
GATAAATATCTTAGAAATGTATTAGATGGGAATGTTGTTTGTCTGGATATGAAACATAAA  
GCTCCATGCCAATTTAAATTTCTCCTTTATTATTAAACATCCAATATGGATATAATGAAA  
GAAGAAAAATATAGATATTTGCATAGTAGACTTAGGAGCTTTGCATTTCCAAATAAGTTT  
CCTTTTGATAATGACCATAAACCACAATTTCAACTTACTGACCAAAGCTGGAAATCTTTT  
TTTGAAGGCTTTGGAAACAGTTAGATCTCAGTGATCAAGAAGAAGGGAGACGATGGA  
AACTCTCAGCGATCGTTTTCAATGCACCTGCAAGACAAATTAATGGACATTTATGAGTCTGG  
TCAAGATGACCTAGAAACTCAAATATTGCATTGGAAATATTTAAGAGAGGAGCAAGTGCT  
TTTGTATTATGCCAGGAGAAATGGCATAATGAGATTGGGGTATCAGTTGGTACCACCATT  
AGCTACCAGTGAAGCTAAAGCAAAAGATGCAATTGGCATGATGCTCCTTTTGCAAAGTCT  
GCAAAGGTCTCCTTATGCTTCTGAGTCATGGACATTAATGCAGACTAGTTTGGAAAGCAGT  
GAGAAGTCCACCTGCGAACTGCTTTAAGAAAGGTCCATACAATATTGAAGTAATGTATGA

CAGTGATCCAGAGAATCTAATGTCATACACATTATGGTCATTTCATTTATTATCAAAGAGT  
AGATGATACTTGGAACAAAGTGGAAGGCCATGTGGACTATAATGGTGCTTATTATTATGA  
AGGCAATTTAAAAACCTATTATATTGAGTTTGAAAGTGATGCTGCCAGATATGGCAAAAC  
TGGACAATGGGAAGTGCATGTTAACAAGGACACTATCTTTGCTCCTGTCACTAGCACTTC  
GCCGGGAAC TGGAGGAGGGGACTCCGACCAAACCTCCGTCCACTCCGTATCCCGGGCGTC  
ATCAACCGTCGCGCGACGGTCTGCCTCCCCCTGCCACCCGAACCACCACACAACGGTC  
ACGAACCGAAAAGCAGACGGTACCAACGAAAAGAATCTAGCCCTACATCCACCGCCACCCG  
GCAACAAAAAAGACAGCGAGAAGAAGAAACCAACAGGCGATCAAGGTCCAGCTCCCGGGG  
GCAAGAAGCAGACTGGGGAGGGGATCGACGCAGAAGGAGGGGAGGAGACTCCTCCACCAG  
GAGCCACTCCTCCAACAGGGCAAGGGGAGGGAGAAGTGGAGGGAGGCCCAGAACAAGGTG  
CCAATCTCGCTCCAATCAAGGTGAGATCCAGAGGCCCTTCTACCAGGCGTGGCGTCTC  
GCCTGCTGAGGTGGGAGAGTCACTTCGATCAGTTGGTCGACGACATCATGACCGACTTGA  
AAGGCTACTGGACGAGGCTAAAGACCCCCCAGTAGTTTTGTTGCGCGGCGCTGCTAACAC  
CTTAAAGTGCTATCGCTACAGAGCTAAAAAGAAGTATAGTGCTTTAGTGAAATACTTTAG  
CACTACATGGTCTTGGGTTGGGGGCGACAATAATGATAGAATAGGGCGTGCTAGAATGCT  
ATTAGCTTTTAGCTCAAATACACAAAGAGAATTGTTTTTAAAGTAATGAAATTGCCACC  
TAATGTAGATTGGTCTTTAGGATCTTTAGATGATTTATAAACTACTAATAACCTACTAAC  
TTGCTTTGCTACTAACACAATAATGTTCCATGGCTCGTGACGTAGAACAAAGCGTGCA  
TCTGTAAACAGACATCTACAGGGGCTGCAAGCAAGCTGGTACTTGCCCTCCTGATGTTATT  
AATAAAGTGGAAACAACTACTATAGCAGATAAAATTTTAAATATAGGCAGTGCTGGTGTC  
TTTTTTGGCGGTTGGGAATTGGCACAGGCCGTGGAACAGGCGGTGCCACAGGATATGTC  
CCTTTGGGGGAAGGACCTGGTGACGTGTGGGCGGCACTCCACCATAGTCCGCCCTGGG  
GTCATTCCCTGAATTGATTGGACCAACAGATGTAATACCAATTGACACAGTCACACCAATT  
GACCCTACAGCACCAGTATTGTACAAATAACTGACACTACAGCTGTTGACCTTTTACCC  
AGTGAAATAGAACTATTGCTGAGGTGCATCCTGTCCCTACAGATAATGTGCCAGTAGAC  
ACACCAGTTGTTTCAGGTGGCCGCGGTTCTGCAGCTGTACTAGAAGTTGCAGATCCTAGC  
CCTCCTGTGCGTTCAAGAATTTCTCGGACACAATACCAGAATCCATCCTTTCAAATTATT  
ACAGAATCTACACCATTGCTAGGCGAATCTTCTATGGCAGATCATGTTTGTAGTATTTGAA  
GGTGCAGGTGGACAAAGTATTGGTGGCACTAGACAGGCTGCCATTGATACAGCACAGGAA  
AGTATTGAGCTACAATCATGGCCTAGCAGATATAGCTTTGAAATTGAGGAAGGTACTCCA  
CCACGAACAAGTACACCAGTACAACGTGCAGTAGAATCTCTGTCTAACCTTAGAAGGGCT  
TTATACAACAGAAGATTAAGTGAACAGGTAGCAGTAACAGATCCTTTATTTTAAAGCAGG  
CCTTCTCGTTTGGTGCAATTTCAATTTGATAATCCTGCTTTTGATGAAGAAGTGACACAA  
TTGTTTGAAAGAGATGTAGAAAATTTGAGGAGCCACCTGATAGACAATTTTGTAGATGTG  
GTAAGATTAGGCCGTCCACAGTCGCTGAAACACCTCAAGGTTATTTAAGAGTCAGTCGG  
CTTGGACGGCGTGCAACCATTAGAATCGCAGTGGTGCTCAAGTAGGAACACAAGTACAC  
TTTTACAGAGATTTAAGCACAAATTGATTCTGAAGCTCCTATTGAAATGCAAATACCTGGT  
GAACATTCAGGAGACAGCACAAATTATTCAGGGTCCCGTGGAAGTTCCCTTTGTAGATGTT  
AATATAGACGAGCCAGATCCTTTAAATGTTGGGCAGTTTGAATCAATGGAAATAGAAGAA  
CCAGATTATAATTCTGCTGATTTTTTACTAGATGACCATGTAGATGATTTTAGTGGTTCA  
CAATTGGTATTTGGAATCCTAGACGCAGCACAACTTCAGTGACTGTACCGCGATTTGAA  
ACTCCAAGAGATACAGGTTTTTATATACAAGATATTCAAGGCCATACTGTTGCTTACCCA  
GAATCTAGAGACAACACTGAAATTATACTCCCCTACCTGATACTCCAAGTGTGGTCATA  
CACATCAGTGACACTAGTGGTGATTATTATTTACATCCCAGTTTACAAACACGAAAACGA  
AGACGCAAACGCAAATATTTGTAATTGTTTTACAGATGACCTTGTGGCTTCCTGCTTCGG  
GTAAAGTATACTTGCCACCATCGCCACCGGTAGCACGTGTCCAAAGCACCGATGAATATG  
TGGAGCGAAACAAATGTGTTTTATCATGCAAGCAGTGATCGCTTGTTAATAGTGGGACACC  
CTTATTATGATGTTAGATCAGGAGATGGCGCAAAAATAGAAGTCCCTAAGGTATCAGGAA  
ATCAATGATAGAGCATTCGGGTGCAATTGCCTGATCCTAATAGGTTTGCAATTAGCAGACA  
TGTCTGTATATAATCCAGATAAAGAACGTTTAGTGTGGGCCTGTAGGGGTGTTGAAATAG  
GCCGTGGGCAACCTTTAGGGGTAGGTACCAAGTGGTCATCCCTTATTTAATAAAGTTAGAG  
ATACTGAAAAATTTCTAGCAATTATCAAGCAGGCTCTACTGATGACAGGCAGAATACTTCAT  
TTGATCCTAAACAGGTTCAAATGTTTGTATTGTTGTTGTGTCCTGTATGGGAGAGCATT  
GGGACAAAAGCTCCTGTTTGTGAATCAGAAGCAGGTAATCAGTTAGGTTTATGTCCTCCAT  
TAGAATTAAAAAACTCAGTAATAGAAGATGGAGATATGTTTGACATAGGCTTTGGAAACA

TCAATAATAAAGTGCTATCATTTAATAGGTCAGATGTTAGTTTAGATATAGTTAATGAAA  
TTTGCAAATATCCTGATTTTTTAACTATGGCAAATGATGTTTATGGAGATGCCTGCTTTT  
TCTTTGCTAGACGAGAACAGTGTTATGCTAGGCATTACTTTGTTAGAGGGGGTGCTGTAG  
GGGATGCAATACCTGATGGTGCAGTGAATCAAAATCATAACTATTTCTTGCCAGCAAAGC  
AAGATCAACAACAACGCACACTAGCAAACCTCTACATATTTTCCAACAGTAAGTGGTTCTC  
TAGTTACTTCAGATGCTCAGTTATTTAATAGACCATTTTGGTTACAAAGAGCACAAGGCC  
ATAATAATGGCATATTGTGGGGAAATCAAATGTTTATAACTGTTGCTGATAATACTCGTA  
ATACTAATTTTTCAATTAGTGTTACTACAGAAGCTGGAGCAACTGAATACAATTCACAAA  
ATATAAGAGAATTTCTTAGACATGTAGAGGAATATCAACTTTCTTTAATACTGCAATTAT  
GTAAGGTACCCTTAAAAGCAGAGGTTTTAACACAAATTAATGCAATGAACTCAGGTATCT  
TAGAAGAGTGGCAGTTAGGATTTGTTCTACACCAGATAATTCAGTACATGATACTTATA  
GGTATATAAACTCAAAGCTACAAAATGTCCAGATGCTGTAGTTCTTAAGGAAAAAGAAG  
ATCCATTTGCTAAATATTCTTTTTTGGCACGTAGATTTAACTGAAAACTATCATTAGATT  
TAGATCAGTATCCCTCTGGTAGAAAAATTTTATTTTCAGGCTGGTTTACAAAGTCGACCTC  
GCTCTGTAAGGACATCTGTTAAGGTCTCTAAGGGTACCAAACGCAAACGGTCGTGACCGA  
TATCGGTGTCAATAAATTTTATAACCAATCTGGTATGTGAAGTATGTTTTTACCCTGTT  
CGTGACTAAACCGTGATTGTTACTGCCAAGACCGCGCCCGGTTAATCAGATTATAAAGTG  
CACCTGGTGCGATTGGATCTAGCTTTTGTGGAAGCACCGCAGGCAACCGCCAAAACCACT  
GCCAAGTCTCTTGGCAGAACATTTCTTGGAAAGACGCACCGCT

>gi|126131393|gb|EF422221.1|\_HumanPapillomavirus\_type\_107,\_complete\_genome  
GTTAATCAGATTATATCGCTGTGCGGTGCCAAACAAGACAAAGACTTGGCTGGATCTCG  
AGGAAACACCGCAGGCGCCCGCCAAAAGTCTGCCAAGTTTTCTTGGCAGAACATCCATTT  
GGCTGCAACTGTACCCGATAACGGTAAGTATTTGTTTTGAGCACCGGTGCCGGTTGCTAA  
ATTACTCATATGGTGATTGTGGTTTACAACCATCATCTTGACATATTACATGTAACCGCA  
TGTGTAGTATCTAATATAAAAATATTTTGTGCTTCTACAACCTGTTGAGTGTCTATGGAC  
AGGCCAAGGACAATCGTACAGCTTACACAGCATCTTAATATAACAGTGGAAAGACTTACTG  
GTACCTTGCAAATTTTGCAAACGATTCTTAACTTTTATAGAACTTTTACAATTTGATTAT  
AAAAATTTACAATTAATTTGGCATGAAAATTTAGTATATGGTTGTTGTTGCAGCTGTGCT  
TATGCATCAGCAGCGTTTGAATTTAAAAATCATTTTGAATTTTCAGGTTGTAGGTAAGCAG  
ATTGAGGAGATCACTCAGCAAAGTATTGGATTTATTAATATTAGATGTGTGTTTTGTTTA  
AAGAATTTGGATTTGTTGGAGAAGTTAGACAATTGTGCTAGGCATCAGCAGTTTTTTAAG  
GTGAGAGGTAATTGGAAGGGATTGTGTAGACATTGTGAGGCGATAGAATGATTGGGAAAG  
AAGTAACTATTCCAGATATAGTTCTGGAAGAGCTGCAAGAGCTTGCTCAGCCCATTGACC  
TGCATTGTTACGAAGAGTTACCAGAGCTTCCAGATGCTACTAGTGAAGAATCAGAGGAGG  
AGCCTGAACGCATCCCTTACAAAATTGTAGTACCTTGTCTGGGTGTCCAGTGAAACTTC  
GTCTCTACGTTTTTGCAACCCATTTTGGCATTTCGGGCATTGCAGGATCTTTTGCTTCAAG  
AAGTCCAACCTGATCTGTCCACAGTGTGCGAGAGGCTATTTCGCCATGGAGGACAATAAAGGT  
ACTGATGCAGGTGCAGGATGTAGTGATTGGTTTTTGGTAGAAGCTGACTGTTCCGATACT  
AGTGATTTAGAAAACGATTTAGAAAAACTGTTAATGAAGAGACAGATTCAGATATTTCT  
GATTTAATTGATGATGGGGATATTGAGCAGGGAAACTCCCGCGAATTGCTATGCCAGCAA  
GAAACAGAGGAGAGCGAGCAACAAGTGCAATTGCTAAAACGAAAGTATTTTCAGTCCTAAA  
GCTATTTTACAGCTTAGTCCGCGGCTGCAGTCCATCTCCCTGTGCCCCAACATAAATCT  
AAAAAACGCTCTGTTTGTGGAGCAGGACAGCGGCTTAGAGCTCTCACTAAATGAAGTTGAA  
GATATTACTGAAGAGGTGGAGGTACCGGCGAGTGCTTCAGTGCCGGCAGCACAGGGTGGA  
AAGGGAGTGGGAGAGATGCATTTTAAACAGCTGTTAAAATCTAGTAATGTTAAAGCTACT  
TTAATGGGAAAAATTTAAGGACGCGTTTGGGGTAGGATTCAATGAACTGACTAGACAATAT  
AAGAGCAATAAGACGTGTTGCAAAGATTGGGTTGTAACCATATACTGTGTTCAAGATGAT  
TTATTAGAAGCTTCTAAGATATTGTTACAAAACATTGTAATTATATATGGATGCATGTA  
CTACAGCCTATGACATTATATTTATTATGTTTTAATGCTGGTAAAAGCAGAGAAACTGTA  
TGATAGATTATTAAGTTCATTCTGCAAATTTGATGATATGCAGGCATTATTAGAGCCTCCC  
AGATTGCGAAGTGTTGTCTGCATTTTGGTACAAAGGCAGTATGAATCCCAATGTA  
TATTCATTTGGTACGTATCCAGACTGGATAGTAGCTCAAACCTATGATAAGTCATCAAGCA  
GCAGAGGCTACACAGTTTTTCATTATCAAGAATGGTACAGTGGGCTTTTGACAATGAGCAT  
TTAGAAGAGGCTGATATAGCATACAATTATGCTAAATTAGCTGAAACTGATAGTAATGCA  
AAAGCCTTTTTGGATAGTAATAGTCAAGCCAACCTTTGTAAGACAGTGTGCTTTGATGGTG

AGGCATTATAAACGAGGGCAAATGAGAGATATGTCAATGTCATGTTGGATTTCATACCCGT  
CTTATGTCTGTAGAAGGAGAAGGACATTGGTCAGAAATAGTAAAATTTATAAGATATCAA  
AACTTAAATTTTATAATGTTTTTGGATAAAATTCGTACGTTTTTAAAGAATACTCCAAAA  
AGAAATTGTATGTGCTTTTATGGTCCACCAGATTCTGGTAAATCTATGTTTACTATGTCC  
TTAATAAATGTATTGAAAGGAAGAGTACTTTCCTTTGCAAACCTCCAGAAGCCAGTTTTTG  
TTGCAGCCTTTGTCAGAACTAAGCTTGCTTTGCTAGATGATGCTACACAAGAATGCTGG  
AATTATATTGATACATTTTTTAAGAAATGGTGTAGATGGTAATTATGTATCTTTAGACATT  
AAACACAGGGCTCCGTTACAGATCAAATTTCTCTCCATTAATGATTACCACAAATATGAAT  
ATACTAAAGGAGGAAAAGTACAGGTATCTACATACTAGAATAGAATTTTTTGAATTCCCA  
AACAAATTTCCATTTGATAATAATAACAAGCCACAATTTACCTAACTGACCAAAGCTGG  
AAATCTTTTTTTGAAAGGCTTTTGGACACAATTAGAGCTGAGTGACCAAGAAGACGAGGGA  
GAGGAGGATGGAGACTCTGAGCGAACGTTTCACTGCACTGCAAGACAAGTTAATGGACAT  
ATATGAATCAGGCCTAGAAACATTGGAAGTCCAAATTGAGCACTGGCAACTCTTAAGACA  
AGAGCAGGTGCTTCTGAACTTTGCTAGGCGAAATGGTATTTTGCAGCTGGGATATCAACC  
AGTCCCAAGTCTTGCAACTTCAGAGACCAAAGCCAAAGATGCAATTGGCATGGTACTTAT  
GTTACAAAGTTTGCAGAACTCCAAATATGCCGAGGAAACATGGAGTTTGGTGCAAACCTAG  
CCTTGAACTGTTTCGAAGTCTCTCTGAAAATTGCTTTAAAAAGGAACCACAGACTATTGA  
AGTGGTGTGTGATGGAGATCCTGAAAATCGTATGATATACACAGTATGGAACCTGGATTTA  
TTTTTCAGAATACAGAGGACATATGGCAAAAAGTTAAAGGACATGTGGACTATGAGGGTGC  
CTTTTACATGGAAGGCACACACAACATTATTTATATAAAGTTTGAAAATGATGCTAACAG  
ATTTAGCGCTACAGGACTTTTGGGAAGTTTCAATGTTAACCAAGATACTGTGTTTACTCCTGT  
TACTAGCTCTACGTCGCAAGCTGGAAGCAGACTATCCCCGCTGCCCTCTGACCCACATC  
CCGACGGCCCAGCCCATCCATCTCCACAGTCACCACCAAGCAGCGACGGTACGGGCGAAA  
AAGATCTAGCCCTACAGCCACCACCACCGGGAGGCAGAGGCAGAGAACGCGAGAGACACA  
GCAAAAAACCAAAGAACCAGAAGCAGGAGCAGAACAAAATCAAGCACCCGTTCAAGAAA  
CCGACGCCGACGCCGACGCCGACGCGAAGGCAAGACACCGACGCCACCAAAGGGCG  
AGGGCAAGGTGGAAGGGGACGGGAACGGGAACGGGAACGAGAACGGGAACGAGC  
AGACACCTCTAACAGAACCTCCCGAGGGGGAGGGCGAAGTGGAAGGAGGCCGAAACCCG  
GTCAAGATCCAGATCCGGAGGATCTCCCGACAGGGTTGGCATTGCGCCTTCTGAAGTGGG  
AAGAACATTACAATCTGTTGGTACAACAGGTCATGGGCGACTTGGAAGGTTACTGGATGA  
GGCTAAAGACCCCCCAGTAATTTTGTAAAGAGGGGAAGCAAACCAGCTTAAATGCTATCG  
CTTTAGAGCACGCAAAAAGCACAAAGGAACTATAAGTATTTTAGTAGTACCTGGTCCTG  
GATAGGGGAACATAGTAATGATAGAATAGGTAGAGCCGAATGTTAGTTAGTTTTACATC  
CACACACCAACGTGAAATGTTTTTAGATACTATGAAATTACCACAAGGTGTAGACTGGTC  
ATATGGGAATTTTGACAGCTTATAATACTAACCTTTTTTGCTATTTTTTAACTGCTGCCTAG  
CTACTAACATACTAACATGGCGCGTGCGCGCAGAACTAAACGTGCCTCTGTACAGATAT  
ATACAAAGGCTGCAAAGCTGCTGGCACATGCCCTCCAGATGTTATTAATAAAGTTGAAAA  
CAAACTATAGCAGATAAAATATTGCAATATGGTAGTGCAGCTGTTTTTTTTTGGGGGCCT  
GGGTATAAGCACAGGTAAAGGCACTGGTGGAAACAACAGGTTATGTGCCTTTGGGAGAAGG  
CCCTGGTGTGCGTGTAGGTGGCACTCCAACAGTGGTTCGCCCTGGGGTCATACCTGAAGT  
TATTGGTCCCCTGAAGTAATACCAATTGATACAGTCACTCCAATTGACCCCTGCAGCACC  
TTCCATAGTTAATCTGACTGACAGCTCTGCAGTTGACCTTTTACCTGGTGAAATAGAAAC  
TATTGCAGAAAGTGATCCTGTTCTGTGCCAGATACAGAAATAGACACACCTGTTGTAAC  
AGGCGGTGCGAGGTTCTCTGTCTGTCTAGAGGTGGCAGACCCAGCCCCCAATACGCAC  
ACGTGTGTCACGTACCCAGTATCACAATCCATCCTTTTCAAGATAATATCCGAATCTACACC  
TATTGCTGGTGAGGCATCCCTGTGACACCAAGTGTTAGTGTTTGAAAATACTGGAGGACA  
AACAAATCGGTGGGATTCGGGAAGAAATTGAATTGCAACCTTACCTTCTAGGTATAGTTT  
TGAAATAGAAGAAGCAACACCAAGACAAACCAGCACACCTATTGAAAGAGGTAGGCA  
AGCGCTTTCTCCATTTCGAAGAGCCCTGTATAATAGGCGCTTAACACAGCAGGTGCCGCT  
GGAAGATCCATTATTTTTTAGTAGGCCATCTAAACTTGTAAGATTTCAATTTGATAATCC  
AACATTTGAGGAGGAAGTAACACAAATATTTGAAAGGGATTTAGAATCTGTTGAAGAACC  
TCCTGACAGGCAATTTTTTGGATGTTGCCAAGTTAGGTAGGCCTCTATATTCCGAAACCCC  
ACAAGGCTATATACGGGTGAGTAGATTAGGCAACAGAGCCTCTTTACGAACCAGAAGCGG  
TGCACAAGTAGGGGCACAAGTACACTTTTATAAAGATGTTAGTACCATTGATTCTGAAGC  
TCCTATTGAACTACAATTACTGGGGGAACATTCAGGAGACACCAGTATTATCCAAGGGCC

TGTTGAAAGTACACTGGTGGATATTAATGTAAGGGATACTCCAGAATTGCTTGAAAGTTC  
TGAATTTAACTCTCAGGATCTACTTATTGATGATGCTATAGAGGATTTTAGTGGGTCACA  
GCTAGTGTTTGGCAACCCTAGACGGTCTACCACTTCTGTCACTGTACCCAGATTTAGTTC  
TCCAAGGGAAACTACTTTTATATGTGCAGGATATACAAGGTTACACTGTAGCATACCCAGA  
ATCACGTGATAGGCCAGTAATAATTTATCCTCAACCTGAGATTCCTGCAGTTGTTATCCA  
TTTTGGGGAATCAGGTGCTGATTACTATTTACATCCCCATTTACAGCGACGCAAGCGCAA  
GCGAGCTTATTTATAAATTGTTTTTCAGATGTCCTTGTGGCTTCCTGCAACTGGTAAAGTA  
TATTTGCCACCATCAACTCCGGTGGCACGGGTGCTAAGTACCGATGAGTACGTGGAGCGG  
ACCAATATATTTTATCACGCCACTAGTGACAGATTATTAACAGTAGGACATCCATATTTT  
GATGTTCCGGTCGTCTGATGGCTCTAAAGTAGAAGTACCTAAAGTGTGAGGAAATCAATTT  
AGGGCATTTCGAATGCTGTTTCCAGATCCCAATCGATTTGCATTAGCAGACATGTCAGTA  
TACAATCCTGACAAGGAAAGGCTGGTATGGGCCCTGTGCAGGTATAGAAATTAATCGAGGA  
CAACCATTAGGTGTTGGTACAACCTGGTCATCCTTTGTTCAATAAGGTAAAGGACACTGAA  
AATACAAATAGCTATCAAAACAGTTCAACAGATGATAGACAAAACATTTCAATTTGACCCT  
AAACAAGTACAGATGTTTGTATAGGATGCACACCATGTTTAGGGGAATATTGGGATAGG  
GCACTGCCATGCGATGATGCTGGTGACCAACAAGGTAAATGTCCGCCCATGAATTAATA  
AATTCTTTTATAGAAGATGGGGATATGATAGATATTGGGTTTGGCAATATAAATAACAAG  
ACATTATCAGTAAACAAATCAGATGTTAGTTTAGATTTAGTAAATGAAATAGCTAAATAT  
CCAGATTTTTTAACAATGGCTAATGATGTGTATGGCGATTCTTGCTTTTTTTTTTGCCAGG  
AGAGAACAAGTGTATGCTAGACATTATTTCACTAGAGGAGGAGCTGTGGGTGATGCTATA  
CCTGATACAACAACATAATCAAGATCACAAATACTATATAGCACCTAAGAGTGGACAATCC  
CAAAGTCCTTTGGGTAATTCTATTTACTATCCCACCGTTAGTGGCTCCTTAGTTTCTTCT  
GATGCACAGCTCTTTAACAGACCCTTCTGGTTGAAACGTGCACAAGGCCACAATAATGGT  
ATTCTATGGGGAAACCAAATGTTTGTACTGTTGCAGACAATACAAGGAACACCAATTTT  
ACTATAAGTGTGCCTAGTCAAAATGGACCCCTTACAGAATATGATGCCAATAATATCAGG  
GAATTTTTTAAGGCATGTTGAGGAATATCAAATATCTGTAATACTGCAACTTTGTAAAGTG  
TCTTTACAACCAGATGTGTTAGCCCAAATTAATGCTATGAATTCAGGCATTTTGGAAGAC  
TGGCAATTAGGTTTTGTACCAACACCAGATAATTCAGTTCATGACACTTATAGATTTATT  
AATTCTGCTGCTACTAAATGTCCTGACAAGGTTGCTCCTAAAGAAAAGGAAGATCCTTTT  
GCTCAATACTTTTTCTGGAGAGTTGATATGACAGAAAAATTATCTTTGGATTTAGATCAG  
TATCCTTTAGGACGTAAATTCCTATTCCAAACAACACTACCTGCCTCTCGAAAACGTGCA  
GCGCCGACCACCAAATCGGTTGCAAAGCATAGCAAACGAAAACGTACTTGACCGAAATCG  
GTCCCTCTCAATAAACAAGTATTCTAACTAAAGTGGTATGTGAAGCATTTTTTAACCGTG  
TTCGTGACTAAACCGAACAAGTCAACACCAGCAACCGCACCCGGTTAATCAGATTATATA  
TCGCTGTGCGGTGCCAAACAAGACAAAGACTTGGCTGGATCTCGAGGAAACACCGCAGCGC  
CCGCCAAAAGTCTGCCAAGTTTTCTTGGCAGAACATCCATTTGGCTGCAACTGTCACCGA  
TA

>gi|9628566|ref|NC\_001693.1|\_Human\_papillomavirus\_type\_60,\_complete\_genome

TATAGGATATACACTGATTGTTGGCAACTATCATTAATCATAAAAAAATATGACCAGA  
AGAGGTATATATAAATAGCTGAGACGTTTCGTAAACTTTAGGATGCAGATGGAAGAAGACA  
GGTTTCCAACAACAGTGGCTGATTATTGCTCTGAATTTGATATTCCTTTAAAAGATCTTA  
AGTTAAAATGTGTATTTTGTAGATTTTACTTAACTGAACAGCAGTTGGCTGCATTTTATA  
TTAAGAATTTAAAGTTAGTTTGGAAAAACCGTTATTGCTTTGCTTGTGTACTCCGTGTC  
TTAGACTTACTGCTAAATTTGAAGCTGAAAACATTTTTCAGTGTATGTGTAAAGGAGAAG  
TATTAGAAGTTCTAACTCGTATTCTTTGAGTTCCTTTCTGTACGCTGTTTTGATTGCC  
TTACATTGTTATCTTTTGCAGAAAAAATAGATTGTATAAATTAGTGGTCAAAACTTTTATC  
TTGTAAGGGGTCGCTGGAGATCATATTGTAGAAATTGCATTGAGAAATGATTGGTAATCA  
GCCTAATGTTAATAACCTTGATGTAAATTTGGAGGAGTTGGTTTTACCTGTCAGTCTTTT  
AGCTGATGAGGAGTTGTGTCACCCGATGGTGATCCTGAGGAGGAGGAGCACTATCCCTATAC  
AATAGACACCTGTTGCAAACCTTGTGGAGCAGGTGTTAGATTTACTATTATTGCTACTCC  
TTCTGCTGTAATAACTCTTCGTCAACTATTGCTTCAAGAAGTGTTCCTGACCTGTTTGAG  
GTGCTCCAGATCCCTTTTTTCGACATGGCAGATCCTAATAAAGGTATTAATTTCTCTTGAAT  
TAAATGAGGGGCATAGCGAATGGTATGTTGTGACAGAAGCTGAGTGTATTAATAGTTTGG  
ATACAATGGAAGAGCTATTTGAAGAAAAGTACAGATGGATCTATTGTGTCCAATCTGATAG  
ACGATTCCGAGGAACTGGAGGAGGGAAATTCCTGGCACTCTACAATGAACAGTTAACAG

AGGATTGCAATAGAGCTATTTTAGCGCTAAAACGAAAGTTAACTAAAACACCTTTGAAAA  
GCCAGGACAGAACGGTTGCTGACCTAAGTCCAAGGTTGGAAGCTGTCACAATTTACCTC  
AGAGACAAAGCAAAAGGAGATTATTTGAGGACAGTGGATTAGGAGAAGATGAAGCTACAA  
ATTCTATTGAAAAAAGGTAGTTTCGAACTCTTTAGAGAGTAATGAAAGTGGGACCTTGG  
TTGTGGAAACGGACAGTATATTTTCGCAGTACTAATAGAAAAGCCACTTTATTGGCTAAAT  
TTAAAGAATACTTTGGTGTAGCATATGGAGATTTAACGCGACCGTTTAAAAGTGATAGAT  
CATGTTGTGAAAACCTGGGTTATAAGTGTGTGTGCCGCTGCAGAAGAAGTAATAGAAGCTT  
CAAAAACAGTTATGCAGCAACATTGTGATTTTTTACAGGTTATTTTCATATGGGTTTTATG  
CTTTATATTTTGGTAAAATTTAAAACAGCAAAAAGTAGAGATACTATAATGAAATTATTTT  
CTTTAACATTGAATGTACAAGAACAACAATTAATGTGTGATCCACCAAAATCTAGAAGTA  
CCCCAACAGCTCTTTATTTTTTATAGAAGGTCATTTGGAAATGCATCGTTTATTTATGGAC  
CGTTTCCAGATTGGTTAGCAAAATTAACATATGTTAGACCATGAATCCGCCGCGAGCTCAG  
AACAGTTTGAACCTTGCTCAAATGATTCAATTTGCTTATGACAATAACTTGACAACCTGAAT  
CTGAAATAGCTTATAAATATGCATTGTTAGCTGATTCTGATGCTAATGCAGCTGCATTTT  
TAAAAAGTAATCAACAGGTAAAATATGTACGAGACTGCTATGCAATGTTAAGATATTATA  
AAAGACAAGAAATGAAAGATATGTCAATTTCTGAGTGGATATGGAAATGTTGCGATGATT  
GTAATCAAGAGGGCAACTGGAAATTAATAGCACAAATTTTTACGTTATCAAGAAGTTAATT  
TCATTTCAATTTTTATGCTGATTAAAGACATTGTTTAAAGGTATTCCAAAAAGAAATTGTT  
TAGTGTTTTGGGGACCTCCAGATACAGGAAAGTCTTATATTTGTTCTTCACTTACACGGT  
TTATGCAGGGAAAAAGTGGTATCTTTTCATGAATAGACACAGTCAATTTTGGCTACAACCTT  
TACAAGATTGTAAGCTTGGATTCTTAGATGATGCTACATTTCAATGTTGGCAATACATGG  
ATGTAAATATGCGAAATGCATTAGATGGTAATCATATTTTCATTAGATTTAAAACATAAAG  
CTCCTTTACAAATAAAATTACCTCCTTTATTAATAACTACCAATGTTGATGTTGAAAATG  
AAGCTAGCTTAAATGTATTTAAAGAGTAGACTAGTATTTTTTAAAGTTTCCTAACAAATTAC  
CTTTAAAAGAAAATGATGAAGTACTTTATGAAATTACTGATGCATCATGGAAATGTTTTT  
TTATCAAATTTGCAAGCCATTTAGAGCTGACAGCCAGAGGAGACGAGCAGCATGAATCAG  
GCCGATCTGACCGAGCGTTCCGATGCACTGCAGGAACAAATACTGAATCTATATGAGCAA  
GATTCAAAGGACATTCAGGCCCAAATACAATATTGGGATTTAAATAGAAAACCTATATGTC  
ACATACTATTATGCAAGAAAAGAAGGCTATTCGCATTTGGGTCTTCAACCTTACCAGCT  
TTGCAAGTATCAGAGTACAAAGCCAAGCAGGCAATCGAAATGGGATTGTTATTAACCAGT  
TTAAGCAAATCCCAATATGCTTCAGAATATGGGGTTTAACAGATACAAGTGCAGAATTG  
TTATTAACCCCTCCAAGAAATACATTTAAAAAGAAGGGATATACTGTAAATGTGTGGTTT  
GATAATAATGAAAATAATACATTTCCCTATACAAATTGGGAATATATTTACTATCAGGAT  
GATATTGAACAATGGCACAGGACCAGAGGAGAGGTGGACTATAATGGACTTTATTTTACA  
GAAAATAATGGAATAGAGCATATTTTCTCCTATTTGATAGTGATGCACAAACATATTCA  
CAAACCTGGGACATGGACAGTGCATTATAAAAACCAAATTATTTCTGCTCCTGTTACCAGC  
TCCTCAAAACAATCCTCCGACGACTACACTTCCAAAGCCGGGCAGCAACCCCACTTCTTC  
GCCTCATCCTCATCGCCGACTACTACCGACGGAGGACAGACCTCACAAAGAGGGAGTCTCT  
AGCTCTACCACGTGCGCCGAGTGCTGTTTCGATTACGACGCCGAAGATCCAACGAGCAACAA  
AGAGAACTATCCTCCAGAGAGTCGCCCCGTACCAAAAGACGCAGAGTACCCGACGAAGTC  
GACCGACAGAGTGCCGTGGGGTCTGCCCCAACTGCTGAAGAGGTGGGAAGCAGACATAGA  
TCTCTTCTTAGAAGCGGTATATCAAGACTTGCAAGACTTCAAGGAGAAGCTCGGGATCCT  
CCAATCCTGCTAATTAAAGGTCTAGCAAACTCCCTTAAATGTTGGAGATATCGATTGAAA  
AAGTATACACGTTATTTTAAATGTATGAGTACAGTATTTAGATGGGTAGACATAGACGTA  
CCAGAATCTTCTAGACATAAATTGTTAGTTGTTTTTAATGATACCACACAACGAGATGTT  
TTTATGAAATTAGTAACTTTGCCAAGAGGTTGTACATATACATTTGGAACATTAACTCT  
TTGTAATATTTGTAAAACAAAACAAAATGTATGCTAGAGTAAAGCGTGTTAAAAGAGACT  
CTGTTGAAAACCTTATATAAACAATGTCAACTTGGTGCTGACTGCCCTCCTGATGTACGAA  
ATAAAGTAGAAGGAACCACTTGCAGATCGATTATTACAAATATTTGGAAGTATCTTAT  
ACCTGGGGAAATTTGGGTATAGGGACAGGTAAAGGATCGGGGGGTGCTACAGGCTATACAC  
CTCTTGGTACTGCAAGAGTGCCAGCGTCTACACCTGGAACAGTTATAAAAACCCACACGAC  
CGTTTTTCGGTTCCTTTAGATCCAATAGGTTCTGGAATTCCATCGCAACCTGTAGGAGGTC  
GGTTACCTGTGGACATTATAGATGCCAGTGCTTCCTCTATTATACCCCTTGACAGGAGGTCC  
TGCCAGAGACCACCATTATAGTAGGCGGTGACAGCGGTCTGGATTGGGTGCAAGTGAAA  
TTGATATAGTTTCAGAACCAAGACCAGATGTGGTCGGTGTTGATACTCAACCAACAGTAT



ATACCTCCATTGATAATACAGTTGCTACATTAGACATTACACCAGCTACACCACCAGTGA  
AGAAAATAATATTAGACCCTATAAGTTTCAGGTTCTGAAGGTGCTGCAGCAATAACATTTT  
CAGATATAAGTGCTGCAGATTTAAATGTATTTGTTGATCCTCAGGGAGCAGGAGATAGAA  
TAAGTTTTGGAGAAGAAATAGAGTTAGGCCCTATTAATCAGCCTGCTCAATTTGAAATAG  
AAGAACCTCCACGTACCAGTACACCTGGGGAGGGATTTCAACGTGTTACAACACGGGCAA  
GGGAATTATATAATAGATTTGTGCAGCAACAGCCAACACAAAATATTGACTTCTTAGGAC  
GTCCTTCCCGCGCTGTACAATTTGAATTTGAAAATCCCGCCTTTTTTAATGATGAGGTGA  
CTATGCAGTTTGTAGCAAGATTTGCAAGAGGTGGCTGCAGCGCCAGACCAGGATTTTGCAG  
ATGTCAGGGAATTAGGACGAGCTCGGTTTTTCAGAAACATCTGCAGGAACAATACGAGTCA  
GCAGATTAGGAACAAAAGGAACAATGAAAACACGAAGTGGACTAACTATTGGTCAGAAAAG  
TTCATTTTTATTTTGATATTAGTGATATTCCAGCTGCAGAAACCATACAACTAAGAACAT  
TAGGCGAGTCTTCCCACGATTTTTCTGCAGTAGATAATATTACTGAAAGTACATATATTA  
ATTTAACTGAAACTACAAATGAAGGCCTAATACCTGACAATATACTAGAGGATGAATTTA  
CAGAAAACTTAATAATGCACAGCTGATATTTGCAACAATAGATGAAGGAGAATCTATGA  
TCATGCCCACAATTCCTCCAGGTGTAGCTTTAAAGTTATTTATTCCAGAAATAGCTGCAA  
GCGTGTTAAATGTGGTTCATCCTTCTCTGAGTGGACTATTTTGATTCTAATGTTCCAG  
ATGAAATTATTCAGCCTGCTATGGCAGTAGATGTTTATGATGACTTTTATTTACATCCTC  
ATCTTCTTAGGCGACGCAACGAAAACGGTTGGATTTTTTTTTAATGTTTTACAGATGGCT  
CTTTGGTTGCAGACAGCTGGACAATTTGTATCTTCCACCAAGCAAGCCTGTTGCTCGTGTA  
CTCAGTACGGATGAATATGTACAGCCAACAAATTTAGTTTTTTCATACAGGAAGTACAGA  
ATGCTAATTTGTAGGACACCCTTATTTTGATATTATAGACAGTGGTTCAAATAATATTACT  
GTACCTAAATGTAGTGAAATCAGTTTAGAGTTATGCGACTACTATTTCCAGATCCAAAC  
AAATTTGCAATGATAGACAGAGCTGTCTTTAACCAGAAAGAGAGAGATTAGTCTGGAGA  
TTGGAAGGCCTTGAAATTGGTAGAGGTGGGCCTTTAGGAATTGGAACCTTCTGGCCATCCA  
TTATTTAATAAATATGGAGATACAGAAAATCCTGCCGCATATCCTTTAAAGCAGAATAAT  
GGTGATGACAATAGAATGGATGTTTCAATGGATCCAAAACAAATGCAATTGTTTATTGTA  
GGATGTAAACCAGCCACTGGTGAACACTGGGATATTGCTAAACCTTGTGATCCTGCTCCA  
GCAAAAGGATCCTGTCCCCCAATTAAATTAACACAGTCTATAATTCAGGACGGTGAAATG  
TGCGATACAGGCTTTGGAAATGCAATTTTATTACCTTGCAAGAAGATAAATCAGGTGTT  
CCTCTAGATATTACCAATGAAATTTGTAAATATCCTGATTTACTAAAAATGACAAAAGAT  
ATCTATGGAGATGCAGTATTTTTCTTTGGTAAACGTGAACAAATTTATTCCAGGCATTAT  
TTTGTAAGAGGAGGGATAGATGGAGATAGTTTGCCAGATTCTGGATATTACTTAGCACCA  
CAAACCTGATAAACCTCAAATAACCTTGGTGGTTATAGTTACTTCCCTACACCAAGTGGT  
TCTGTAGCTTCTAGTGATAATCAACTTTTTAATAGACCTTATTGGCTTCACAGAGCCCAA  
GGTGCAAATAATGGTATTTGTTGGGGTAACCAATTATTCATTACTATAGTAGATAAATACT  
CGAAATACTAATTTATCTATTTTCAGTTTACAAACAAGATGCTGCTATTGATAACAGATAT  
AAATATAAACAGGAAGATTTTAGACAGTATTTACGCCATACTGAAGAATATGAAGTAGAG  
TTAATTCTGAGACTCTGTAAAGTGCCTTTGAATCCAGATGTTCTAGCTCATTTAAATGTA  
ATGGACAAAAATATTTTAGAGGATTGGCAACTTTCATTTGTACCTCCACCACCACAAGGT  
ATTGAAGATGCTTACAGATATATAATGTCTCAGGCAACAATGTGTCCAACAGATGTTTCCT  
AATACTGAAAGGGAAGACCCTTATAAACAGTATACATTTTGGACAATAGATTTGCAAGAA  
CGTTTTTCTAACGAATTATCCCAGTTTTCTCTTGGAAAAAGATATTTATATCAGTATGGC  
TTACTTAACGGACGAAAACGGTCTGCTAGTAGTTTTGTAAACGAAGAAATCAAAAACCTGTG  
AAACGTAAAAGAACTAAATAAATACATATATATATTATATGATTAATGAAGGATATATTA  
ATTAATAATGCTGCTGTTGTAAAATGAAGGATTAATAAATTGCACATCAGCAAGTGTCTG  
ACTCACGGGGTCTACATTTTTGTCTACCGCGCCTTCATAATTATCTTGGCATTGCATATC  
GAGACTATAAGAAACAATCAGTTGGCACACTCTCGGATTTAACAAGCATTGCTGGACACT  
TACCAACCGTAACCTGGTTAAAAAAGAGCGCCAAAGGGGAAACAGGCAACCGTTTTTCGTTT  
TCCTGAAGGAACGTTTTCCAGGTAAGTACATGTTTCATACAAAGTTTTTGACTCACTCTCTT  
TGTTAGAAACCAATTTCCGTTCTGTGGATATGCGCCAGACCAAAACGGTTGCC

>gi|9628550|ref|NC\_001691.1|\_HumanPapillomavirus\_type\_50,\_complete\_genome  
TCTATCTAATAATAGTTGCCAACAATTATTAGACATAGAGACGTGACAACCGACTACGGT  
GCATATAAAAAGAGCTGATCAGCACAGATTTGAAGGAGACTGATGGAGCCTCAGAGAGCTA  
AAAATTTGGTGGACTATTGCAAGCAACAACAGATTAGTTTTTTTTGAATTAGAGCTACAGT  
GCTTGTTTTGTAAATTTGTTATTACTTTGCCTGACTTAGCTAGCTTTCATTGTAAAAAGT

TAGCTCTTGTATTATAGAGATGGTATTGCTTTTGCTGCGTGCGCTAAATGCTTAAGATTGT  
CTGCTATCTTTGAAAATGAGAGATATTATACTTGCTCTATAAAAGCTTACTTGCTATCTG  
ATTTGATTGGTAGACCTTTGAGTGAAATCGCAATTCGCTGTGAAAATTGTATGTGTTTGT  
TGGATTATATTGAAAAGTACGATTGTATTTGTCACGGTGGTTATTTTCATTTAGTTAGAG  
GTAATTGGAGGGGCTGTTGTAGAAATTGTTACGAACATGAGGGGTGATAAACCAACTATT  
CCTGATATTGTTTTAGAAAGAGCTTGTTTTGCCCTGTGAATTTGCTTAGTGACGAATCTATT  
GAAACTGATGACATAGCAGAATCTGAAAGGTCACCATTCAAGATTGATTCTACGTGTAAG  
CATTGTCAATTGTGCGGTTAGACTGTGTTGTGTGCGCCACCGACGCAGCTATCCGTGTGTTT  
GAGTGCCCTTCTTCAATCAGAATTTTCTTTTCTGTGTCTTAAGTGCTCCAAAAGAATTGCTA  
CGAAATGGCAGAACTTAAAGGTACAGATAATAATTCTAATGTAGAAAATTATTAATGAGTT  
GTTTGATAATGAAGCTGTCTGTGATGATGATTCTTTTCAGGAATTGTTTGATGAAAGTAC  
GGATGAATCTACTATCTCTAATTTAATAGATGACTCTGAAAACGTTGTGCAGGGGAATTC  
CCATGCATTACTAAATGCACAGCTTTTCAGAGGAATATGACAAAGACCTGGTTACAGTAAA  
ACGAAAGTTTTATGCCACCCCGGAAAAGCTCGCCTCTGATTTGAGTCCGAGACTTTCAGC  
GGTGCATATAACACCAGAAAGACAATCCAAAAGGCGTTTATTTAGAGACAGTGGGATTGA  
AGATGAAGCTGAAAATTCTATTGTTTCAGGTACAGGATGATAGTTCGAATGTGGCGGGAAA  
CAAAAATGGCGCTGATGCGGAGTTGTATTCGTTGCTTCATAGCAATAATCGTAGAGCTGC  
TTTGCTTTGTAAAGTTTAAAGAAAAATATGGCATTCCATTTAATGAAATTAAGTAACTTT  
TAAAGTAATAAGAGTTTACACAAAATTTGATTATTGTAGTTTTCCTGCTGTCAGAAGA  
TTAAATTGAAGCTTCTAAAACACGATGCAAAATCATGTTTCCATTATTACAAATGATTAC  
TTCTGATTTTTCAGCTTTGTATATTATTGCTTTTAAGGCTGCTAAGAGCAGAGAGACTGT  
TGTTAAATTGATTAATAGCTTGCTAAATACAAAAGAGGAACAAGTACTATGTGATCCTCC  
TAAAAATAAAAAGTATGGCTGCAGCATTATATTTGCTATAAAAAGGTAATAGCAGATACCTG  
TTATAAATATGGAGACTTTTCTGACTGGATAGCCACACATACTGTTATAAATCATCAGCT  
AGCAACTGCAGACAGCTTTAAATTTAGTGATATGGTACAGTGGGCATACGATAATGATAT  
GCTGGATGAAGCTGCAATTGCTTACAATTATGCGTGCTATGCAAGTGAAAATGAAAATGC  
AGCTGCATTTTTTACAACTAATAGTCAATTAAAGTATGTTAAGGAATGTTGTGCAATGGT  
CAGGTTATACAAAAAGCAAGAAATGAGGAATATGACTATGCCAGAATGGATTAAATCATG  
TTTCACAAATAATTATAATTCTGATGATTGGAAAGTTATTGTAAGATATTTAAATATCA  
AAATATTAACCTTTTTTAGAATTTTTGTTAGCTTTAAAGTTACTTTTTAAAGGCATACCTAA  
AAAAATGTGCTTAGTTATTTATGGACCACCAGATACAGGCAAGTCATACTTTTGTATCA  
ATTTATTCAGTTTATGAGAGGAAAAGTTGTATCCTTCATGAACAAAAATAGTCATTTTTG  
GTTAATGCCTTTATTAGATTCAAAAATAGGATTTTTTAGATGATGCAACTCAATGTTGTTG  
GATGTATTTGGACACACACATGAGAAATGCATTTGATGGTAATGCAGTTTCTGTTGATGT  
GAAACATAAAAAATTTACAACAAATAGTTTACCACCTATGTTAATAACAACAAATTGTGA  
TGTATGCAGAGATCCAACGTTTATGTACTTAAGGAGTAGATTAACATGTTTAACTTTCC  
AAATAAGTTACCATTGTATGAAAATGGGAGAACCAAAATTTAAATTTACTGATAATTGCTG  
GACGTCTTTTTTTTAGCAAGTTTTTGGAAAGCACTTAGATTTACCTGAAGATGACCCAGATGG  
AGACACAGGAACTCTGAGCGCACGTTTTCTTGACACAACAGACATTCGAATTGAATCTGA  
TTGAAAAAGATTCAAAAAATTTAAAGACCATATAGACTATTGGGAATCTATGAGAAAAG  
AACAGTGCTTGCATTTTATGCAAAAAAAGAAAATATGAGCAGGCTTGGATTACAACCTC  
TTCCTCCTGCTAAGGTTTCTGAGCAAAAAAGCAAAAGATGCAATTAGAATTCGAATTACTTT  
TGCAATCCTTGTATAAGTCTGATTTTGGGTCTGAACCATGGACTTTATCAGAATGTAGTT  
TAGAAATGTTAAATGCACCTCCTAGAAATGTTTTTAAAAAACAACCGTTTACTGTAACTG  
TGCAATTTGACAAATGATCCTAAAAATGTGTATCCTTATATATGTTATGAATATATATATT  
ATCAAGATGATAGAGACAAATGGCATAAAGTTAAAGGTCTAGTGGATCACAATGGCCTTT  
ATTTTAAAGAAGTGACTGGTGATTTCAGTATACTTTAAACTCTTCAACCTGATGCCACTG  
TATATTGGCAAACTCGGACATGGACTGTTATATTTAAAAACAAAACATATTCATTCCTCTG  
TCACTAGCTCCTCAAGGAGATGCGTTTGGGCTGCTGACGAACAGCCCGGCTTCCACAT  
CGTACGACAAGAGCCAAGAGGAAAGATCTGGAAGCGGTCAACCAAAAGCCCTACAGGACA  
CCGAACCAAGACCTCGACATCAACAGTACGACTTCGACGAGGACGACGAGAAAGAGAAC  
ACCATTCCCTACAGACACAGAAAGTCACAATCAGAATTGGGAGCCGACTCTGCGCCAACCTC  
CTGAAGAAGTGGGAAGAAGATCTCACACAGTTGCAGCGCATGGTCTGTCAAGACTTAGAC  
GATTACAAGAGGAAGCTCGGGATCCACCAGTCCTAATTATTACAGGTCAACAGAATAATC  
TTAAATGTTGGAGGTATAGGTTCTCACAAAAATATGCAGATCTCTATGAGTGTTGTAGCT

CTGCATGGAAGTGGTTGGGCCCCAAATCAGAGGGATACAGGGGTGATGCTAAATTGCTTA  
TTGCTTTTAAAAATCCTGAACAAAGGCTATCTTTTTTAAACACTGTTGGATTACCCAAAA  
ATACTACGTACTCTATGGGACATTTGGACTCTCTATAATGCTTCGACAGCGCAAACGGGC  
AAGCCCTACGGACTTATATAGATCATGCTTACAAGGGGGGGATTGCATACCTGATGTTCA  
AAATAAATTTGAAGGCAACACAATCGCAGATTGGTTATTGAAAATATTTGGAGGTTTAGT  
ATACTTTGGCAATTTGGGAATTGGAACAGGAAGAGGAACTGGGGGTACTTTTGGCTATAG  
ACCTTTTGGGGCCCCCTGGGTCTGGAAGGCCAACTCAGGAACTACCTATCGCAAGACCAAA  
TGTTGTTATAGATCCATTAGGGCCAGCGCCTATTGTACCAGTAGATCCCTCTGCAGCTTC  
AATAGTTCCATTAGTAGAAGGCGCCCCCTGATGTTGGATTTGCAGCTCCAGATGCTGGACC  
TGCAGCAGGTGGAACCTGATATTGAATTATATACTATAACAAATTCCACAACAGATGTTGG  
TGCTGTTGGTGGTGGGCCCCACTGTTACCTCTAACGAAGAATTTGAAGTAGCTGTTATAGA  
TGCACAACCAATTGCACCCTATCCAAAGCAATTATTATATGACTCTACTATAGCAGCAAC  
TTTTGAAACACAGATTAATCCCTTCATAAATCCAGACATAAATAATGTTAATGTATTAGT  
TGACCCCAGCTTTGCAGGAGACACTGTAGGTGACTACTTTTATGAAGAGATACCTTTGGA  
ACGTTTAGATATTCAAACCTTTGACATTTTAGAGCCACCTACTGAAAGCACGCCCACCCA  
ATTAGGTAATAGGTTTGTCTTAGGGCAAGAGATCTGTACAGTCGATTTGTTGCACAGCA  
GCCAATATCTGAGCCAGATTTTTTGTAGTCAACCTTCCCGCCTTGTTTCAGTTTGAATATAG  
AAATCCCGCCTTTGACCCAGATGTGAGCCTATACCTTTGAGCGGGATTGGAAGGCCTCAG  
GGCAGCGCCATTGCAGGAATTTGCTGATGTAGTTTATTTAGGCAGGCAAGAGTATCCAG  
CACCTCAGAAGGTACAATAAGAGTAAGTAGATTAGGTACCAGAGCAGCTTAAACAACACG  
TAGTGCTCTTTCTGTGGGACCTCAGGTACACTTTTATATGGATTTAAGTGATATACCTCC  
AGAGGATTCTATAGAGTTGCATACATTAAACGTTACACCACAAACAAGTACAATTGTAGA  
TGATATATTAGCAACAACCTACATTTGATGATCCTGCAAACTCCTTATTTACACAGTTTAA  
TGAAGATGTATTAAACAGACGATGTTGAACATAATTTTACAGAGTCTCATTTAGTTATACC  
AGCTACTGATGAAGAAAATGACACAGCAATAAATATTATTAATTTAAGAAAATATTCCTCT  
TACTGTGGGCATGAATTCAGGTGACATATCTACTACATTATCAGATTATAATATTTTAGA  
TGCATCCTTGATAGTAAAATCAAATGTTTCTGAACAGCCCCTTTTTGTTTTAGATTATTC  
AGATTATGATTTACATCCAGGTCTTCTTCCAAAAGAAGACGCATAGATTATTTTAAAT  
TATTTTACAGATGGCTCATTGGTCCTCAACCTCTGGAAAGTTATACCTTCCACCAAGTAC  
TCCTGTTGCCAGAGTTTAAAGCACCGATGAATATGTGAAAGAACTGATGTTTACTTTCA  
TGCACGCAGTGAGCGTTTACTAATTGTGGGACACCCATATTATGATATAGAAGATGGTGG  
AGATATCAAAGTTCCTAAAGTATCAGCAAAATCAATACAGAGTTTTTTCGTTGTGAATTACC  
AGATCCTAACAAGTTTGTCTAATTGATACTACATTGTATAACTCAGATACAGAACGTTT  
GGTTTGGAAACTAGTAGGTATAGAAGTCGGGAGAGGTGGGCCTTTAGGTGTTGGATCTAC  
TGGTCATCCCTTGTTTAAATAAGGTTGGAGACACAGAAAATCCTAGCTTTTACTTAGGTCC  
ACAAGAAAAAGATGAAAGACAAAACCTGTCTATAGATCCTAAACAAACACAGTTATTGAT  
TGTAGGCTGCAAACCAGCTGTTGGTGAATATTGGGATTTAGCAGAACCTTGTGACAAAAA  
CAGCTTAAATAATGGCAAGTGTCTCCAATACAACCTAGTAAACAGTTATATTCAGGATGG  
TGATATGGGAGATATAGGATTTGGTAATGCAAACCTTTCCTAAACTACAACAGGACAGAGC  
AGGGGTCCCTTTAGATATAGTGGATTCAATCAGCTTATGGCCTGATCTATTAAAAATGAC  
TAAAGATGTCTATGGGGACCATGTGTTTTTCTATGCAAAGCAAGAGCAATTATATGCCAG  
ACATTTGTTTACCCATGCAGGACCAATTGGGGAACCTATACCTAATGTCTCAGGAGTTTA  
TAATTATGCAGTAAACCCTAATCAACCAGAGCAAAATCGTAGAACCAATATTGGTTCCTA  
CTTATATTTTACTACACCAAGTGGATCTTTAAATACAAGCAGTTCACAGTTATTTAATAG  
ACCATATTGGATTTCGACAGAGCTCAGGGTACGAACAATTGTATTTGTTGGGGTAATGAGGT  
ATTTGTTACAGTATTTGATAACACCAGAAACATTAACCTTTAATATTAGTGTTAAGAAAGA  
TGTC AATCCTTTGGATCCTTTAAATGTAGCAAGTTCTTATATGTACTCAAAGGATGATTT  
TAATCAGTACAGCCGTCATACTGAAGAATATGAATTAGAATTTATATTTTCAAGTTATGTAA  
AGTAGGATTGGATGCTGATATATTAGCTACATCTTAATGTAATGGACCCAGAAATTTTGGGA  
AAATTGGCAATTAGCTTATGTTTCCACCAGTCCCAAGTGGTATAGGCGATACTTACAGATA  
CTTAAATCTGATGCTACAAAATGTCTGCAAAGACAGTAGCGCCGAAGTAGTAGACCC  
TTATAAAGAAATATACTTTTTGGAAATGTCAACCTTACAGAAAAGTTTTTCGTCTGAACCTGA  
TCAGTATGCCCTAGGACGAAAATTTTTGTTTCAGACTGGATTATTAAAGAGAAGAGTTAG  
AACTGATTACACTGTTGCTACAGTTTCCAAACCAACAAGAGAAAACGTACCAGATAAGC  
TGCTGACATGCTTCTTGGCTTTACTGTGAATATTGTACTGTGAATTCTATACTGTGAAT

GCTTTAGATCTGAGTCTTGAACATTTACAAAAATGAATAAACAAATAAAGTTAATGTACA  
GGTGTGTGTTGCTTTTGAGTCAGAGTTATTTACTCCCGCCCTTTGTAGTATAAATATGTT  
GCACCTCTGTGATCAATCATGTTGACCAGCTGGACGTGCTGTACACCGGTCACTTTAAGA  
GAGACACGACCGTTTTTCGGTAAGTTTGTATGCCTTTAGGGAATATAAAGCGACCGAAGTC  
GGTACTTGCTAACAAAGATAAAAATCTCACGAGTTAGAACAACCTCTGAGTCACCTCAGT  
GCAGCTGGCAGAAGAAAGTATACCGATATCGGTTGCTATGTTTT  
>gi|9628542|ref|NC\_001690.1|\_Human\_papillomavirus\_type\_48,\_complete\_genome  
TCTGACGCATAATAATTGTTGGCAACAATCGTGCATAATAACTTAGGAACCGAGACAGTA  
TCATATAAAATACTGCTGAACAGTAGATTTCTTCAGAAGCTGATGGAGCCACAATTTCCCTA  
CTGATTTGGATTTCATACTGCAAATATTTTAAACATAAGCTTTTTTGAAGTTAGTTCTTAAGT  
GTATCTTTTGTAAATTTTCTGTATCTATTGTTGATCTTGCTTCTTTTCATAACAAACGAC  
TGTCTGTAATTTGGAGAGATAATACACCATTTGCATGTTGTACTAAATGTTTAAGATTAA  
CTGCATTATATGAAAAAGATAATTTTTTTGTCTGTACTGCAAAAAGTCATTTGTTAACTG  
GTTTAGTTAAAAAGGAATTGTCAGATATTAATATTAGGTGCCAACATTGTTATTCATTTT  
TAGATTATTTAGAAAAGTTGTACCATTTATATAATGATGTTGATTTTCTGTTAATTCGCG  
GGACTTGGAGAGGTGTTTGTAGAAATTGTATCAGCCATGAGGGGAGATAAGGCTACTATT  
CCTGACATAGAGTTAGAAGAGCTTGTTTTGCCTGCTAACTTAATTTCTGACGAGTCATTG  
TCACCAGATGCTACTGCAGAGGAGGAGTTTGTCCGTACCGGATAGACTCCAAGTGTCAC  
AATTGTGGCTGTCGCATAAGGGTGACAGTCGCTGCAACTGAATTTGGAATACGTTGTTTT  
GAGCAACTGTTACTGAAAAGAGCTTTGTTTATTTTGTCTGCTGCCAGACAACCTCCC  
CGCAATGGCAGTATCATAAAGGTACTGATAATATTGATCATAATGATGTTTGTAGATGGGTC  
TTGGTGTTTAAATACTGAAGCTGAATGTGAGGACGATACGTTAGTGGATTTGTTTGAGGA  
GAGCACAAATGACTCTGTAGTTTTCGAATCTGTTAGACGATTCCGAAAAGTATAATTCAGGG  
GAATTCTGAGGAAAGTGACCGCTGTATTCAGGAGCTAAAAAGAAAGTTAAATGTTACTCC  
TGAAAAACAGATCTCAGAGCTAAGTCCGCGGTTATCGGCAGTGCATATAACGCCTGAGAG  
AGCATCTAAGCGGAGACTGTTTAATGATAGTGGAGTTGTTGAAGATGAAGCTGAAAGTAA  
TACTATTACAGGTAGATTCACTGTTGGTGCAAAAAGACGCGGGAAATCAAAATGGCGCTGA  
GTGTGAACTTAATTTCTATTTTGCCTAGTAATAATATCAGAGCTACTGTACTTTGCAAATT  
TAAAGATAAATTTGGGGTTTCATTTAATGAGCTTACAAGAAGTTTTAAAAGTGATAAGAC  
ATGTACACCAAATTTGGGTAATAACAGCAATAGGTATTAGAGAAGATTTACGAGATGCTTG  
TAAAGTTTTATTACAGCAACATGTTGAGTTTTTAGAAATGATTTGCAATGATTTTTCTGT  
GCTACTATTGGTAGAATTTAAGGTAACATAAAATAGAGAAACGGTTTTAAAGTTAATGTG  
TAGTATGTTAAATGCTAAAGAAGAACAAATTTTGTGTGAACCGCCAAAATGAAAAGTAC  
AGCTGCAGCTTTATATTTCTATAAGAAGATTATAACTGATACATGTTTTAAATATGGCAC  
TTTGCCTTCTGGGTTAGTAGATTAACATATAGTAGAACATCAGTTAGCTTCAGCAGACAC  
ATTTTCATTATCTGAAATGGTACAATGGGCTTATGACAATGATTTTACTGAAGAAGCATC  
TGTTGCTTATAATTATGCATGTTATGCCACAGAAAATACAAATGCAGCAGCCTTTTTTAGC  
CAGTAATATGCAAGTTAAGTATGTTAAAAGATTGTGTAGCAATGGTTAGAATGTATAAAAG  
ACAAGAAATGAAATCAATGACAATGTCAGAGTGGATTTCCAAATGTTGTAAAGAAGAAAC  
TATTGGTGAAAGAGTGGAAGAAATTTGTACAGTTTTTTAAAATATCAGGGAGTAAACTTTTT  
AGAATTTTTAATAGCTTTAAAACAATTTTTTAAATGCACTCCTAAAAAGATGTGTATAGT  
AATATATGGTCCACCAGATACTGGAAAGTCAATGTTTTGTTTTAAATTAGTACAATTTTT  
GAAAGGTCAAGTTGTATCTTATATTAACAAATCGAGTCAGTTTTGGTTAATGCCATTACA  
AGATGCTAAAAATTGTTTTGTTAGATGATGCCACACATAATTGTTGGATTTATTTAGACAC  
ATATTTGAGAAATGCATTTGATGGTAACACGTTTTGTTTAGATATTAAACATAAAAACCT  
GCAACAGACAAAACCTTCCACCTATGATAATACTACTAATGTTAATGTAACAACTGATGA  
ATCTCTATTTTATTTGAGAAGTAGACTTACGTGTTTCAATTTTCCGAATAAGTTACCAAT  
GTCTGACAAAGATGAACCTTTGTTTACCATTTCTGACAAAAGCTGGACCTGTTTTTTTAG  
AAAGTTTGGAAATCAATTAGAACTTCAAGAAGATGCAGCCAGAGACCCAGGAGAGCCTGA  
GCACCCGTTTGTGTCACAGCAAGAAATTCAGTTGACTTTGATTGAAAAAGAATCTTATG  
ATCTTAAAGATCATTTAGCATACTGGAAGCTGTAAGATTAGAAAATGTTATTGCCTATT  
ATGCTAGAAAAAGACATATTACTAAATTAGGTCTGCAGCCATTACCAACATTAGCTGTAA  
CTGAATATAAAGCAAAAGAAGCAATTAATATACAGCTGCTTATTCAAAAGTTTATTGAAAT  
CAGAGTTTGCTTTGGAAAGATGGACTCTTGACAGAACTAGTGCAGAACTATAAACAGTT  
CCCCCAGAAATTGTTTCAAAAAGTACCTTTCATTGTAAATGTATGGTTTGATAATGATG

AAAGAAATTCTTTTCCTTATACCTGTTGGGATTTTATATATTATCAAGATGACCAAAACA  
AATGGCACAAGACTGAAGGGCTGGTTGATCATAATGGATGTTATTATGTAGATCTAAATG  
GTGATTTTGTATACTTTACTTTATTTCAACCTGATGCTGTAAAATATGGAAAACTGGAC  
TATGGACAGTTAGATTTAAAAACAAAACCTATTTCTGCCTCTGTTACTAGCTCCTCGAGAA  
ATACAAATCCCTCTTCTGAAAGCAGGGTCTGGGCTCTCGACCTCCAGCAGCTCGGAGAGCC  
CTCGAAGGAGACCGAGCATCTCAGAAAACCTCAACACCGAGTCGCCCACCTCCTCGACAT  
CCAGACTACGAGAGCGACGACGACGAGAACCGAGAGAATCTGGAACCACCGACACCACAC  
CCAGAAGACGAGGAACAAAGAGGAAATTTGGGGTCCGACTCTGCACCAACTCCTTCGGAAG  
TGGGATCAAGATCTACAACGCTTGCAAGACACGGTTACTCACGACTTGGACGATTACAGG  
AAGAAGCTCGGGATCCGCCATTAGTGTTATTTACAGGTCAACAAAATAATTTGAAATGTT  
GGAGAAATCGCTGTACTACAAAATATGCTAGTTTATTTTTATGCTTCAGCTCTGTTTGGA  
AGTGGCTTGGTCCTAATTCTGATGGGGGTGCTGCAAAAGTGTTAGTTGCATTTAAAAGTG  
ATGCCCCAAAGACAAGTGTTCTTAAACACAGTTCATATTCCTAAAGGAACTACTATAACTC  
TGGGAAGACTTGACAGTTTATAATGTCTTACGTAGAAGAAAAAGAGCAAGTCCTACTGA  
TCTTTATAAAACATGCTTGCAAGGGGGGGACTGCATTCTTGATGTTAAAAATAAATTTGA  
AAATTCTACTATTGCAGATTGGTTATTAATAATTTTGGAAAGTTTGGTATATTTTGGAAA  
TTTGGGAATAGGATCTGGAAAAGGGTCTGGGGGATCATTTGGATATAGACCATTAGGATC  
CGCAGGAAGTGGAAGACCAGCCACAGACTTACCAGTGACTAGACCTAATGTTGTGATAGA  
ACCTATAGGTCCCTCAAAGTATAGTACCCATTGATCCTGGAGCGTCATCTATAGTCCCTCT  
TGTTGAGGGAGGGCCTGATATATCTTTTATTGACCAGATGCAGGTCCAGGTATAGGAGG  
TGAGGATATTGAACCTATTACCTTTAGAGATCCAGCAACTGATGTAGGTGGTGTAGTGG  
AGGTCTACTACTATTTCTACAGAAGAAAGTGAGACAGCTATAATAGATGCTTTACCAAG  
TGCCACAACCTCCCAAACAGTTGTTTTATGATTCTTATACACAAACTATCTTGCAAACACA  
GGTAAACCCATTTTTTAAATAATGCTATTAGTGATACTAATGTGTTTGTAGATCCATTATT  
TGCAGGAGAGACAATTGGGGACAACATATTTGAAGAGATACCCTTGCAGAATTTAAATTT  
CAGTTTTCCGCGGGAAAGTACACCTGTTAAACCTGGGAGGGGTTTACGAACACCAGCTCA  
AAGATCTTACAGTAGATTTATGGAACAGTACCCAATCCAAGCTCCGGAATTTCTTAGTCA  
GCCTTCTCGATTGGTGCAGTTTGAGTTTGAAAATCCCGCCTTTGATCCAGATATTAGTAT  
ACAGTTCCAGCGTGATGTAAATAGCCTAGAGGCTGCGCCAAATCCAGCTTTTGCTGACAT  
TGCTTATTTAAGTAGGCCGCACATGTCTGCTACATCAGAAGGATTAGTCAGAGTCAGCAG  
AATTGGATCTCGAGCAGTATTACAAACCAGGAGTGGATTAACTATAGGCCCTAAAGTACA  
TTATTATATGGATTTGTCTGCAATATCAACAGAAGCTATAGAATTGCAAACCTTTGCAGA  
TTCTGGACATGTTACACAATAGTTGATGATTTCTTATCAGTTACTGCTTTAGATGATCC  
AGCAAATATAGCTGATATAAATTATACAGAAGATGATTTATTAGATCCTTTACTTGAAAA  
CTTTAATAAATTCACATATTACAGTACAAGGGGTTGATGAGGAAGGAGAAACAGTTGCTCT  
TCCAATTCCCTCAATTACTAATTCTTCCAAAACTTTTGTTACAGACATTGCAGAAAATGG  
TCTGTTTGCAAATGATACAGATAGTCTTTTAACCCAGCAAGCACTATTGTACCTGCTAT  
TAATTGGTTCCCTTTATTTGATAGTTACTCAGACTTTTGCTTTAGATCCCTTTTTTTATTCC  
ACGTAAGAAAACGACGCTTAGATATCCTTTAATGTTTTTCAGATGGCTCTGTGGTCTGCAG  
TCCCTGGCAAGGTTTACCTACCTCCTAGTGCAACCAGTAGCTCGTGTGTTGCGCACTGATG  
AATACGTGCAAGAAACGGATGTATATTTTTATACAAGCACTGAAAGACTTTTAATAGTTG  
GTAATCCTTATTTTGATGTTGAAAACAGAGACACTATAACAGTACCTAAAGTTTCTGCTA  
ATCAATACCGAGTATTTAGATGTAAACTCCAGATCCTAACAAGTTTGCTCTAGTTGATA  
AAAATTTATATAATTCAGATAAGGAACGTTTAGTTTGGAAACTTGTTGGTTTGGAAAGTAG  
GCAGAGGGGGTCCCTTGGCGTAGGATCTACAGGTCATCCTTTACTAAATAAGATAGGGG  
ACACAGAAAAATCCTAGCTTTTATTTAGGAGAACAAACAAAGGATGAGAGACAAAATGTTT  
CCATGGATCCTAAGCAGAGTCAGATACTAATAGTTGGTTGTGCTCCAGCCACTGGAGAAT  
ACTGGGATTTAGCTAAACCATGCAATGATTTGGAAAACGGGGCTGCACCACCAATTCAAC  
TAGTTAATACTGTTATTTCAGGATGGTGATATGGGAGATATAGGCTTTGGGGCTGCTAATT  
TTCCTAAGTTGATGCAGGATCGTGCTGGCGTCCCTCTAGAGTTAATAGATTCTATTAGTA  
TATGGCCAGATTTTTTAAAGATGACCAAAGATATTTATGGAGACTCTGTCTTCTTTTTTG  
GTAAACGGGAACAATGTTATGCTCGTCATCTTTTTTGCAAGAGCTGGCCAAATGGGGGAGC  
CTATACCAACAGAAAATGGAGTATATTATATAACTCCTGATTCTGCCGATCAAAACAACA  
GATCTTCTCATTTAGGATCTTCTGTGTATTTTACAACACCAAGTGGATCCTTGAATACTA  
GCGATTCTCAGTTATTTAATAGGCCTTATTGGCTTAGACGAGCCCAGGGAACAAATAATG

GCATTTGTTGGGGAAATGAGCTGTTTATTACAGTTTTTTGATAATACTCATAATGTGAATT  
TTACTATTAGTGTTAAGAATGATAAACTGCATTAAGTAACTGAAAACCTACATAGATAATGGTT  
ACAAATATAATAATGCAGATTTTAAACAATATCTTCGACATACAGAAGAATATGAAATAG  
AGTTGGTTTTTTCAGTTATGCAAAGTGAAGTGGTACTGACAGATGTTCTGGCACATTTACACG  
TTATGAATCCCAGAATATTAGAGGAGTGGCAATTAGCTTTTTGTTCCACCAGCTCCAACGG  
GCATTGAAGATACCTACAGGTATATCAAATCCATGGCTACTAAATGCCCTACTGCTGAAC  
CAGAAGAAGACACAGATCCATACAAAGCTTACAGTTTCTGGACTTTAGATATGACAGAGC  
GCTTCTCGTCTGATTTAAGTCAGTTTTTCCCTTGGGTCGAAAATTTTTATATCAAACCTGGTT  
TGTTAAATGGTAAACGAGCTAGAACAGACTATACAGCTGCAGGATCTAGTACCAGATCTA  
CAAAGCGTAGGAGAGTAAGATAGTAAAGATGTAGAATGTTTACATTATTAATACTGTGAA  
TCAAACAAACTGTGATCAATAAACTGTGAATATTTTACCGTGGTGTCAATTTATACGCC  
TCCATTGGGTGGGTTCTGACCTATAAACTCCTGGGTGAGTCAATTTGGTGCAGCAGACGCTG  
AGGAGCAGCAGACGATTCAGACGTCCATTTGTGAGACGAAGACCGTTTTTCGGTAAGTTTC  
ATAGCCGCCAGGTATTGTTTGTACCGATACAGTTACACCTTAAATGTACTGCCAACTTT  
TACAAGTTCAGACAGAGATCAACAAGATATCTTAAACAGTACCTAAAGCGGTACTGTAC  
CGTTTGTGGTATGTTGATGC

>gi|9628486|ref|NC\_001683.1|\_HumanPapillomavirus\_type\_24,\_complete\_genome

GCGCCAAGTTTCTTGGCACTCGCACAGCACCGTTAACGGTAAGTGTGTTTGTATACTGTAC  
CGGGCGCGATACCAAATATGCCACCTGCGCAATTGTTGTTAGCAACTACTTTCATTACCT  
AACAAGATTATTTTCATGCACCTTTCCGTATCAGTGTGAATGTATTTATTGATTAGACATA  
TAAAAAGGAAGACATCTTGATGGCTCAACAGGTAAACCTCAGTCAGTGTAGAACTTAG  
TAGATTATTAAATATACCATTAGACGATTGTGTTGTACCATGTAACTTTTGCAAAAGATT  
TCTAAGTTATACAGAGTTAACTGACTTTGACACCAAATGCTTAAGTTTGATTTGGAAAGA  
CGATTTTGTGTTTGCATGTTGTAGATATTGTTGTGTTGCTACAGCAGCATTTGAATTTGA  
AAATTATTTTGTAGAGAGTGTGATAGGTTGGGAAATAGAACAAAAAGAAAATACACCTCT  
TTCGGACATTATTGTAAGGTGTACCATTGCTTAAATTAATTAATCAAATGAAAAGCT  
TGATATCTGTGGAAGATCTGAATTATTTCTATAAAGTGAGGAGGGGCTGGAAAGGACTCTG  
TAGGCAGTGTAAAGCAGATATAATGATTGGAAGAGAGTCACTCTACAAGACATTGTCTTA  
GAGTTGACTGAGCCACAGACTGTTGATTGCACTGTGAAGAGGAGTTGCCAGAGCAGGAT  
ACGGAGGTGGAGCCTGAAAGAAGAGCTTACAAAATAATACTTTGTTGCGGCGGCGGTTGT  
GGAACCCGGCTTCGATTATTTGTAGCAGCAACACAGTTTGAATACGTGGCCTGCAAGAC  
TTACTGCTAGAAGAGGTGGTCATTTTGTGTCCCAGTCCGTAACAGCGATCTGCAGCAT  
GGCGGACAATAAAGGTAGTGAACAGACGGGTTGCATGAATGGTGCTTATTAGAAGCTGA  
CTGTAGTGATATTGAAAATGATTTGGACACATTGCTTGAGCAAAATTCAGATTCTGATGT  
ATCAGATCTTATAAGTAATGATGGGGACTTGGAACAGGGAACTCCCGAGAACTGTTTCA  
ACAGCAGGAGTTAGAGGAGAGCAATGCTTTGTTGCAAAGTCTAAAACGAAAGTATATTAG  
TCCTAAAGCTGTATTACAGCTGAGTCCACAACCTGAATCCATTTGCTGTCATCAGACCA  
TAAACTAAGAGGAAATTGTTTGTGAGCAGGACAGTGGAGTAGAATTGACCCTTACAAA  
TGAAACTGAAGATGTTACTACATTGGTGCAGCAGGAGGAAGAGGTACCAGCTTTAGAGAC  
ATCTTCCACCAGTAACCTTAAGGAAGGAAGATAATGCACATTATAAAGAACTTATGCGATG  
CAGTAACTTAAAGCTACCTTACTATCAAAATTTAAAAATGCTTTTGGTGTAAGCTTTGT  
TGAAGTGAAGTCCAGTTTCAAGTAATAAGACTTGTGTAATGATTGGGTGGTAGCAAT  
ATATGGTGTAATTTATGATTTATTTGAAAGTTCTAAGCAATTACTACAACAGCATTTGTGA  
TTATATTTGGGTTACAGAAATGTCTGCAATGTTTTTATATCTGTTGTGTTTCAAGGCTGG  
CAAAAATAGACAACTGTTATAAGGTTATTAGTGTCTATGTTATATGTGGCAGAGGAGCA  
AATTTTATCAGAACCTCCAAAATTGCGAAGTACAGTGTGAGCTTTATTTTGGTATAAAGG  
TAGCTCAAATGCTGCTACCTTTACACATGGGTCTTATCCTAAATGGATTATAGAACAAC  
ACTGATAGGACATCAAACAGGAGAAGCTGCAACGTTTGACATGTCCACAATGGTACAATG  
GGCTTTTGATAATGATCTCACAGAGGAAGCTGACATAGCTTTTCAATATGCAAAGCTGGC  
ACCTGTGATGTAAATGCAACTGCTTGGTTGGCTCACAATAATCAGGCGGTTTTGTAAAG  
AGAATGTGCTAATATGGTTAGATATTATAAAAAAGGTCAGATGCGAGAAATGTCTATGTC  
GGCATGGATCCACTTTAAATTAGAGCAAGTAGAAGGGGAAGGGCAGTGGTCAACTATTGT  
AAAATTTATTAGGTATCAGGGTATAAATTTTATTAGTTTTTTAAGTGCTTTAAAGATTT  
TTTACATGGTAAACCTAAAAAGAATTGTTTATTAATATATGGCCCTCCAAACTGGA  
ATCAGCATTTACTATGTCATTAATTAAGTGTTGCATGGCAGAGTAATATCATTTGTAA

TTCTAAAAGTCACTTTTGGTTGCAACCAATGTCTGAAGCCAAAATAGCTTTACTTGATGA  
TGCTACTGATCCATGTTGGATATATATGGATACATATTTAAGAAATGGTCTTGATGGACA  
CTTAGTTTCATTAGATTGTAAGCATAAAGCACCTATACAAATACGCTTTCCTCCATTACT  
TATAACATCTAATATTAATGCAATGGCAGAACCTAACTATAGATATTTACACAGTAGGTT  
AGTAGCGTTTGAATTTCCCTAATCCCTTTCTTATGAAAGATGACGATACCCCTGAATTTGA  
ACTTACTGACCAAAGCTGGAAATCTTTTTTTTAAAAGGCTTTGGAGACAATTAGACCTCAG  
TGACCAAGAAGACGAGGGAGAGGATGGAGAACCTGAAAAAGCGTTTCGATGTGTTGCAAG  
ATCTACTAATGAACATTTATGAACAAGGCAGTGATACACTAGAATCACAAATTTGAACATT  
GGCAGGCCTTGCGAAGAGAGGCAGTGTTACTTTATTATGCTAGACAAAATGGGGTGCTGC  
GGCTGGGTTACTTACCAGTTCACCACTAGCTACCTCAGAAGCCAAAGCTAAACAGGCTA  
TTAGTATGGTGTTGCAGCTGCAATCTTTACAACAATCTCCTTATGGCACAGAAAAGTGGA  
CACTGGTGGACACAAGCATAGAAACCTTTAAAAATACTCCAGAGAACCATTTTAAAAAAG  
GACCTATAAATGTGGAGGTTATATATGATGGTGATCCGGACAATGCCAATTTGTATACTA  
TGTGGAAATATGTATATTATATGGATGATAATGACCAGTGGCAAAAACTGAAAGTGGCG  
CCAATCATACAGGCATATATTATTTAATAGGGGAGTTTAAACATTATTATGTGCTGTTTG  
CTGATGATGCCAATAGATACAGTAAATCTGGCCAATGGGAGGTGAGGATTAATAAGGAAA  
CTGTGTTTGCCCTGTCCACAGCTCCACACCACCCGACTCCCCAGGAGGGTCCCGAGAAC  
TACCCGGATCCACCGCTAACTCCAAGGCCTCAAGCCCAACCCAACAGCCACAACAAGCCT  
GTAGTGACGAAACAACAGCGGAAGAGGTACGGGCGAAGGGAGTCAAGCCCCACTGACT  
CCAGATGCAGACACAGCATCTCGTCCCGGCAAAAGAAGCAAGGGCGACGAGCACGGTCCC  
GCACCCGCTCGCGCTGCAGCTCCACTCAAATCGATCTAGATCCACCTCAAGGAGGTCCA  
GATCAACCTCCAGGGGCAACAGGAGGTGTAGGGGAGACACCCCCAGAGGGCAACGAGGAG  
TCTCAACCTCCTCCAGGGGAAGGGGAAGGGGCAGTAGAAGGTCATCCTCCTCCTCCTCCC  
CCACCCCCAGAACCAAAGCCTCACAACGGGGATGCGACACACGGTCTGTTAGGGACAGTG  
GCATCTCTCCTGGGGACGTGGGAAGAAAAGCTTCAGACAGTTAGTGGAAGAAATTCAGGAA  
GACTTGACGATTATTGGAGGAGGCTCTCGATCCCCCAGTAATTTTACTTCGTGGGGGTG  
CTAACACATTAAAATGTTTTCGCAACAGGGCAAAGCTTAGATATAGAGGACATTATAAAG  
CATTTAGCACATCTTGGTCATGGGTAGCTGCAGATGGCACAGAGCGTCTAGGCAGGTCCA  
GATTGCTCGTCAGTTTTACCAGTTTTAAGCAGCGAAGTGGGTTTCTCGACCTAGTAAGAT  
TTCCTAAGGGTGTAGATTGGTCACTGGGAAGTTTTTGATAAACTGTAAGTACTAACATAGC  
TTTTTGCTACTAACACACATATAACCTATTTTTTACTTTTTTGTATGCTTTGCAATGGTGCGT  
GCTAAAAGAACAAAACGAGATTCTGCTACTAATATTTACAGAACATGCAAGCAGGCGGGC  
ACATGTCCACCTGATGTTATTAATAAAGTGGAACAGTCAACCATTGCTGATAATATACTT  
AAATATGGAAGTGCTGGTGTCTTTTTTGGTGGCCTGGGTATTAGTACAGGCCGAGGGACT  
GGAGGCACCACAGGATATGTGCCATTGGGTGAAGGTACTGGAGTTCGTGTGGGCAGTACA  
CCCACAGTCGTTTCGGCCTGCCCTTGTGCCTGAAGTAATAGGTCTGCTGACTTATTACCT  
GTTGATACAATAGCCCCTGTTGACCCAGCATCGTCATCTATAGTTCTCTTACTGAATCA  
TCAGGTGTAGACCTTTTACCTGGTGAAAATAGAAACAATAGCAGAAGTACATCCTATACCT  
GATGTGCCCACATTTGATACTCCAGTAGTGACAACAAGCAAAGGCTCTAGTGCCATTTTA  
GAAGTAGCTCCTGAGCCTACTCCACCGACACGTGTTTCGTGTCAGCAGAACACAATACCAT  
AATCCAGCATTTTCATATTATTACAGAATCTACACCAAGTCAAGGTGAGAGTTCATTGTCA  
GACGAAATAATTGTCGCCTCTGGTGCAGGTGGACAATCAGTAGGCGTTTCTGAAAATATA  
GAACTGCAGGATTTATCAAATAGATATTCCTTTTGAAATAGAAACACCAACACCACCAAGG  
CGTAGCAGTACCCCATTAACAAGAGCTACACAAGCATTTAGACAAAGATCACTTACAAAT  
AGGAGACTGTTACAACAAGTGCCCTGTTGAAGACCCTTTGTTTTTAACTCAACCATCTAAA  
TTGGTTAGATTTGCATTTGAGAATCCAGCTTTTGAAGAGGAAGTAACACAGGTATTTGAA  
CAAGACCTTGACAGTTTTGTAGAGCCTCCTAACAGAGATTTTTTAGATATTGCAGAACTG  
GGAAGGCCTAGATTTTCTGAAACACGCGAGGGTTATGTTAGGTTAAGCAGATTGGGTCTG  
AGAGCAACTATTAGAACAAGGCAGGAACACAAATAGGAGCACAAAGTACATTTTTATAAA  
GATCTAAGTCTATTATAACTGAAGCTCCTATTGAGTTGGATCTTTTAGGGCAGCATTCT  
GGGGATGCAACTATAGTTTCATGGGACTGTAGAAAGCACATTTATAGATACTAATATAGAG  
GAAAATCCTTTAGCTGAACAAATGGAGTTGGAAATTGATACTTATCCTGAAGCTCATTCA  
TTTGATGCTTTGTTAGATGAAGCAACAGACGATTTTAGTGGTTCACAGTTAGTTATAGGC  
AATAGAAGATCCACTACATCATATACTGTTCCCTAGATTTGAATCCCCAAGAAATTTCTTCT  
TATTATGTACAGGATTTGCAGGGATATTATGTAGCCTATCCTGAATCTCGCGATAAAATA

GAACTTATTTATCCCTCACCCACATTACCTGCAGTTGTCATACATACAGAAGATAGTAGT  
GGGGACTTTTATTTACATCCTAGTTTATTGCAAAGGCGCAGACGCAAACGAAAATATTTG  
TGATTTTACAGATGTCGGTGTGGTTGCCAGCCAGTGGTAAGGTATATTTGCCACCATCA  
ACACCTGTTGCGAAAGTTCAAAGCACGGATGAATACATACAGAGAACAAACATCTTCTAT  
CATGCTTATAGTGACCGCCTATTAAGTGTAGGACACCCATATTTCAATGTTTACAACAAT  
GATGGCACAGTATTAGAGGTCCCTAAGGTTTCAGGAAATCAACACAGAGTTTTTAGGCTT  
AAATTACCAGACCCTAATAGATTTGCTTTAGCAGATATGTCCGTATATAATCCAGAGAAG  
GAAAGATTGGTATGGGGTTGCAGAGGAGTAGAAATAGGTAGAGGACAACCATTAGGTGTT  
GGGACAAGTGGACATCCATTATTTAACAAGTGAATGACACAGAAAACCTGTATCATAT  
AGGACACAAGCATCGTCCACAGATGATAGACAAAATACCTCATTTGATCCTAAACAAATT  
CAAATGTTTATTATAGGTTGTGCACCCTGCATAGGAGAACATTGGGAAGTAGCTGAGAGG  
TGTGCTGGTGATAAATGATGCTGGTAGATGTCCACCTATTAAGTTAGTAAATTCAGTA  
ATTCAGATGGTGATATGGCAGATATTGGTTATGGGAATTTAAATTTTAGAACACTACAA  
CAAAGTAGATCAGACGTAAGTTTGGATATTGTAAATGAAACCTGTAAATATCCAGACTTT  
TTAAAAATGCAAATGATGTTTATGGAGATTCTTGTTTTTCTTTGCTCGCCGTGAGCAA  
TGTTATGCAAGACATTTTTTTGTACGAGGAGGTAAACCAGGGGATGACATACCTGGTGAG  
CAAATTGATGCAGGGACCTACAAAAATGACTTTTACATTCCAGCAGCCACAGGTCAGACA  
CAAAAAAATATTGGCAACTCAATGTATTTCCCAACAGTCAGTGGCTCATTTGGTATCTAGT  
GATGCTCAATTATTTAATAGACCATTTTGGTTACAGCGTGCACAAGGTCATAATAATGGA  
ATTGTGTTGGGCTAATCAATTGTTTCATTACGGTAGTAGATAACACCAGGAACACCAATTTT  
AGTATAAGTGTATACACTGAAAATGGCAAAGTAACAGATATTAACGAGTATGATGCTAAT  
AAATTTAGGGAATATCAGAGACATGTAGAAGAGTATGAAATTTCACTTATACTGCAGCTA  
TGTA AAAATCCCTTTTAAAGCAGATGTGTTAGCACAGATCAATGCTATGAATCCATCTCTA  
TTGGAAGAGTGGCAGTTAGGATTTGTGCCTGCACCAGACAATCCTCTTCAAAGTACCTAC  
AGATATATAGAAAAGTTTGGCAACACCTTGTCCAGATAAAGTAGCTCCAAAAGAAAGAGAA  
GATCCTTATGCCCCTTATACGTTTTGGAATGTAGATTTATCTGAACGCTTATCTTTGGAA  
CTGGATCAATATTCCTTAGGACGAAAGTTCCCTGTTTCAAGCGGGTCTTGTACAAAAACA  
TCTAAAAAACATCTAATGTATCCAAGGGGACCAAACGAAACGCACGTAAAATAAAGGC  
TGTTTTACCGTTTTCGGTACAATATATGTGTATTTCCAAGAATGCTTGTTATTCATGTGCGT  
GACTAATTTGAACTTTGGCTTGAATGTCAACCGCACCCGGTACAAGTAGATAAAATCTTG  
CTACCACAGCAGACACAAAGGAATCACTGTGCGTCTCAACACGCTCGGATTTGGCGCATT  
CAACCGTTTTTG

>gi|9626063|ref|NC\_001356.1|\_HumanPapillomavirus\_-1,\_complete\_genome

GTAACTACCATCATTCATTATTCTAGTTACAACAAGAACCTAGGAGTTATATGCCAGAA  
GTAAGCCTATAAAATACACAGGTAAGACTCTGCACAGGACCAGATGGCGACACCAATCCG  
GACCGTCAGACAGCTTTCCGAAAGCCTCTGTATCCCATATATTGATGTTTTATTGCCTTG  
TAATTTTTGTAAATATTTTTTGTCTAATGCTGAGAAGCTGCTTTTTGATCATTTTGATTT  
GCATCTTGTCTGGAGAGACAATTTGGTGTTTGGATGCTGTCAAGGGTGTGCTAGAACTGT  
TAGCCTATTGGAGTTTGTTTTATATTATCAGGAGTCTTATGAGGTACCGGAAATAGAAGA  
AATTTTGGACAGACCTTTATTGCAAATTGAACTCCGTTGTGTTACATGCATAAAAAAACT  
GAGTGTGCTGAAAAATTGGAGGTTGTGTCAAACGGAGAAAGAGTGCATAGAGTTAGAAA  
CAGACTTAAAGCAAAGTGTAGTTTGTGTGCGCTTGTATGCTATATAACAATGGTGGGCGAA  
ATGCCAGCACTAAAGGACCTGGTTCCTCAACTTGAACCAAGCGTCCTAGATTTAGATCTT  
TATTGTTACGAGGAGGTGCCTCCTGATGACATAGAGGAGGAGTTAGTGTGCGCTCAGCAA  
CCTTATGCTGTGCTTGCCTTCCTGTGCCTATTGCGAGAACTGGTTCGATTGACCGTCCTC  
GCGGATCACAGCGCCATTAGACAGCTGGAGGAACTCCTTCTGCGATCTTTGAACATCGTG  
TGCCCACTGTGCACCCTACAGCGACAGTAAAAATGGCAGATAATAAAGGTACTGAAAACGA  
TTGGTTTTTGGTGGAGGCGACAGATTGTGAGGAAACGTTAGAGGAAACCTCACTTGGTGA  
CTAGATAAATGTTCTTGTGTAGCGACTTATCTGATTTATTAGACGAGGCGCCGCAAAG  
CCAGGGGAATTCCTGGAATTGTTCCACAAGCAAGAATCGCTGGAAGCGAACAGGAACT  
TAATGCTTTAAACGAAAGTTACTTTACAGTCCCTCAGGCGAGAAGCGCGGACGAAACAGA  
CATTGCTAGCATTAGTCCTAGATTAGAACTATTTCTATTACAAAGCAAGACAAAAAAG  
GTATCGAAGGCAACTGTTTTCTCAGGATGATAGTGGTTTAGAGCTATCGCTGCTTCAGGA  
TGAAACTGAAAATATTGATGAATCGACACAGGTAGATCAACAGCAGAAAAGAACATACTGG  
GGAAGTTGGGGCCGCTGGGGTGAACATTTTGAAAGCTAGTAATATCCGCGCCGCATTATT



AAGCAGATTTAAAGATACGGCTGGCGTCAGTTTTACAGACCTGACGCGGTCGTACAAGAG  
CAACAAAACCTGTTGTGGAGATTGGGTTTTGGCAGTTTGGGGTGTCCGTGAAAATTTAAT  
TGACAGTGTAAGAATTATTGCAAACCCATTGTGTGTATATTCAATTGGAACATGCAGT  
AACTGAAAAAATAGATTTTTTATTTTTATTGGTACGATTTAAAGCCCAGAAAAGTAGAGA  
GACTGTGATAAACTTATAACCACAATTCTTCCAGTTGATGCTAGCTATATTTTGTCTGA  
GCCTCCAAAATCAAGAAGTGTGGCTGCTGCATTATTTTGGTATAAAAGATCTATGTCTTC  
AACTGTTTTTACATGGGGTACAACCTTTGGAGTGGATTGCACAGCAAACCTTATTAATCA  
TCAGTTAGATTCCGAAAGTCCCTTTGAGCTTTGTAAAATGGTTCAAGTGGGCCTATGATAA  
TGGACATACAGAAGAGTGTAAAATTGCATATTATTATGCTGTTTTAGCAGATGAGGATGA  
AAATGCAAGGGCATTCTAAGCTCTAATTCACAGGCAAAATATGTGAAAAGCTGTGCACA  
AATGGTAAGACACTATTTACGTGCTGAGATGGCACAAATGTCTATGTCAGAGTGGATTTT  
TAGAAAAGTAGATAATGTAGAAGGTTCTGGTAATTGGAAAGAAATTGTAAGATTTTTAAG  
ATTTCAAGAAGTTGAATTTATAAGCTTTATGATTGCATTTAAAGATTTGTTATGTGGTAA  
GCCAAAGAAAACTGTTTTGTTAATATTTGGACCTCCAAATACAGGAAAAATCAATGTTTTG  
TACAAGTTTATTAAAGTTGTTAGGAGGGAAAGTGATTTTACTGTAAACAGTAAAAGTCA  
GTTTTGGTTGCAGCCTCTGGCTGATGCTAAGATAGGGCTATTAGATGATGCAACAAAGCC  
ATGTTGGGATTATATGGACATTTATATGAGAAATGCATTGGATGGTAACACTATTTGTAT  
TGATTTAAACATAGAGCTCCTCAACAAATTAAATGCCACCTTTACTTATTACTAGTAA  
TATTGATGTTAAATCAGATACCTGTTGGATGTATTTGCATAGATAATCAGCTTTTAA  
ATTTGCTCATGAGTTTCCATTTAAAGACAATGGTGATCCAGGATTTTCCCTAACAGACGA  
AAATTGGAAATCTTTCTTTGAAAGGTTTGGCAACAGTTAGAATTAAGTGACCAAGAAGA  
CGAGGGAAACGATGGAAAACCTCAGCAGTCGCTTAGACTTACTGCAAGAGCAGCTAATGA  
ACCTATATGAACAGGACAGTAAATTGATAGAAGATCAAATTAAGCAGTGGAATCTAATTA  
GACAAGAACAAGTTCTTTTCCATTTTCGCCAGAAAAATGGGGTAATGAGAATTGGATTGC  
AGGCAGTTCCATCTTTAGCGTCCTCAGAGGAGAAGGCAAAGACAGCTATTGAAATGGTGT  
TACATTTAGAGTCTTTAAAGGACTCACCTTATGGCACAGAGGATTGGTCACTTCAAGACA  
CTAGCAGAGAGCTGTTTTTGGCACCCCCAGCTGGCACCTTCAAGAAGAGTGGCAGCACAC  
TTGAGGTTACCTATGACAATAACCTTGATAATCAGACAAGGCACACAATTTGGAATCATG  
TGTATTATCAAAATGGGGACGATGTATGGAGAAAAGTATCCAGTGGTGTGATGCTGTAG  
GAGTGTACTATTTAGAACACGATGGCTATAAAAATTATTATGTGTTATTTGCTGAGGAGG  
CCTCTAAGTACAGCACAAACAGGACAATATGCTGTAAATTACAGGGGTAAAAGGTTTACAA  
ATGTTATGTCTTCCACTAGCTCCCCAAGGGCTGCTGGGGCTCCTGCAGTACACTCCGACT  
ACCCAACCTATCCGAGAGTGACACCGCCCAGCAATCGACGTCCATCGACTACACCGAAC  
TCCCAGGACAGGGGGAGACCTCGCAGGTCCGACAAAGACAGCAGAAAACACCTGTACGCA  
GACGGCCTTACGGACGGCGAAGATCCAGAAGTCCCAGAGGTGGAGGACGAAGAGAAGGAG  
AATCAACGCCCTCTAGGACACCCGGATCTGTCCCTTCTGCGCGAGACGTTGGAAGTATAC  
ACACAACGCCCTCAAAGGGACATTCTTCAAGACTTAGACGACTTCTGCAGGAAGCTTGGG  
ATCCACCCGTGGTCTGTGTAAAAGGGGGTGCCAATCAGCTTAAGTGTCTCAGGTACAGAC  
TTAAAGCATCTACTCAAGTTGACTTTGACAGCATAAGCACCACATGGCATTGGACAGATA  
GAAAAAACACCGAGAGGATAGGTAGTGCTAGAATGTTAGTAAAGTTTATTGATGAGGCTC  
AACGAGAGAAGTTTCTTGAGAGAGTTGCTTTGCCCAGATCAGTGTCTGTGTTTTTGGGAC  
AGTTTAAATGGGTCCTAAAATTAATGGAAGTTGATTTTGCTTGGACGTGTGTACATAGTCC  
CTGTATATATTCCCCCTCTACCCCCACATACCTTGAAGCTTGCAACATTGTAACAAATGT  
ATCGCCTACGTAGAAAACGCGCTGCCCCAAAGATATATACCCCTCATGCAAAATATCAA  
ACACCTGCCCACCTGACATTCAAAATAAAATTGAGCATACAACAATTGCTGATAAAATAT  
TGCAATATGGCAGTCTGGGAGTTTTTTTGGGAGGTTTGGGCATTGGAACAGCCAGAGGCT  
CTGGAGGAAGAATTGGTTATACTCCCCCTCGGTGAGGGTGGTGGGGTTAGAGTTGCTACTC  
GTCCAAGTCCAGTAAGGCCCTACAATACCTGTGGAAACAGTAGGCCCCAGTGAAATTTTCC  
CCATAGATGTTGTAGATCCTACAGGCCCTGCTGTTATTCCCCCTACAAGATTTAGGTAGAG  
ACTTCCCAATACCAACTGTGCAGGTTATTGCAGAAATTCACCTATTTCTGACATACCAA  
ACATTGTTGCATCTTCAACAAATGAAGGAGAACTGCCATATTAGATGTGTTACGAGGGA  
ATGCAACCATACGCACTGTTTTCAAGAACACAATACAATAACCCCTCTTTCACTGTTGCAT  
CTACATCTAATATAAGTGCTGGAGAAGCATCAACATCAGATATTGTATTTGTTAGCAATG  
GTTTCAGGTGACAGGGTGGTGGGCGAGGATATCCCCCTTGGTAGAATTAAACTTAGGCCTTG  
AAACAGACACATCTTCTGTTGTACAAGAAACAGCATTTTCCAGCAGCACACCAATTGCTG

AAAGACCCCTCTTTTAGGCCCTCAAGATTCTATAATAGGCGTCTATATGAACAGGTGCAAG  
TACAAGACCCCTAGGTTTCGTTGAGCAGCCACAGTCAATGGTCACTTTTGATAATCCAGCAT  
TTGAGCCAGAGCTTGATGAGGTGTCTATTATCTTCCAAAGAGACTTAGATGCTCTTGCTC  
AGACACCAGTGCCTGAATTTAGAGATGTAGTTTATCTGAGCAAGCCCACATTTTCGCGGG  
AACCAGGGGGACGGTTAAGGGTTAGCCGCCCTTGGCAAAAGTTCAACTATTCGTACACGCC  
TGGGCACAGCAATTGGCGCCAGAACCCACTTTTTCTATGATTTAAGTTCTATTGCTCCAG  
AAGACTCAATTGAATTATTGCCTTTAGGTGAGCATAGTCAAACAACAGTCATTAGTTCCA  
ACTTAGGTGACACAGCATTATATACAAGGTGAGACAGCAGAGGATGACTTAGAAGTTATCT  
CTTTAGAAAACACCACAATTATATTTCAGAAAGAAGAGCTTTTAGACACAAAACGAAAGTGTGG  
GCGAAAATTTGCAACTTACTATTACTAACTCAGAGGGTGAGGTTTCTATACTAGATTTAA  
CACAAAGCAGAGTCAGGCCACCTTTTGGCACTGAAGATACTAGCTTGCATGTATATTACC  
CAAATTCTTCTAAAGGGACTCCAATAATTAATCCTGAAGAATCATTTACACCTTTGGTTA  
TTATAGCTCTTAACAACTCAACAGGGGATTTTGAGTTACATCCTAGTCTTAGAAAAGCGTC  
GTAAAAGAGCTTATGTATAATGTTTTTCAGATGGCTGTCTGGTTACCAGCGCAGAATAAG  
TTCTATCTTCTCCCCAGCCCATCACTAGAATCCTGTCCACTGATGAATATGTAACCAGA  
ACCAATCTCTTCTACCATGCAACATCTGAACGCTACTGCTGGTCGGACATCCTTTGTTT  
GAGATCTCCAGTAATCAAACGTAACTATACCAAAAAGTGTCAACAAATGCATTTAGAGTT  
TTTAGGGTGCGTTTTGCTGATCCAAATAGATTTGCATTTGGGGATAAGGCAATTTTTAAT  
CCAGAAACAGAAAAGATTAGTTTGGGGCCCTAAGAGGGATAGAGATAGGTAGAGGCCAGCCT  
TTAGGTATAGGAATAACGGGCCACCCCTGTTTAAATAAGTTAGATGATGCAGAAAATCCA  
ACAAATTATATTAATACTCATGCAATGGAATTCCTAGACAAAATACTGCTTTTGATGCA  
AAACAGACACAAATGTTCTCGTCGGCTGTACTCCTGCTTCAGGTGAACACTGGACAAGT  
AGTCGTTGCCCAGGGGAACAAGTGAAACTTGGGGACTGCCCCAGGGTGCAAATGATAGAG  
TCTGTCATAGAAGATGGTGACATGATGGATATTGGTTTTGGGGCTATGGATTTTGCTGCT  
TTACAGCAAGACAAGTCTGATGTCCCTTTAGATGTTGTTCAAGCAACATGCAAATATCCT  
GATTATATCAGAATGAACCATGAAGCCTATGGCAACTCTATGTTTTTTTTTGCACGTCGC  
GAGCAAATGTATACCAGGCACTTTTTACTCGCGGGGGTTTCGGTGGGTGATAAGGAGGCA  
GTCCCACAAAGCCTGTATTTAACAGCAGATGCTGAACCAAGAACAACCTTAGCAACAACA  
AATTATGTAGGCACACCAAGTGGCTCTATGGTTTTCATCTGATGTCCAATTGTTTAATAGA  
TCTTACTGGCTTCAGCGATGTCAAGGCCAGAATAATGGCATTGCTGGAGAAACCAGTTA  
TTTATTACAGTTGGAGATAATACCAGAGGAACAAGTTTATCTATCAGTATGAAAAACAAT  
GCAAGTACTACATATTTCAATGCTAATTTAATGATTTTCTAAGACATACTGAAGAATTT  
GATCTTTCTTTTATAGTTTCAGCTTTGTAAAGTAAAGTTAACTCCCGAAAATCTAGCCTAC  
ATTCATACAATGGACCCTAATATTTTAGAGGATTGGCAACTATCTGTATCTCAACCACCT  
ACCAATCCTCTAGAAGATCAATATAGGTTTTTAGGGTCTTCCTTGGCAGCAAAATGTCCA  
GAACAGGCGCCTCCTGAGCCCCAGACTGATCCTTATAGTCAATATAAATTTCTGGGAAGTC  
GATCTCACAGAAAGGATGTCCGAACAATTAGACCAATTTCCACTAGGAAGGAAATTTCTA  
TATCAAAGTGGCATGACACAACGTACTGCTACTAGTTCCACCACAAAAGCGCAAAACAGTG  
CGTGTATCTACGTCAGCCAAGCGCAGGCGTAAGGCTTAGTATATATTATATATAACTATA  
TTTATTAGTAGATTATTTATTATATATTTTTATATTTTATACTTTTTTATACTTGTTTAG  
TTCTAAATAGACATGTAAGATTTACATTAGTATAAGTAGGCATGTATTTACATAAAATAG  
TCTTGGAACCTTTTATTAGTGAACCATCATTTACAATAGTGACATCATAGTTCATCTGC  
AATTGCTATTCATCGTTCCTTACATATCTACAGTAGTGTTCTCTAGATTGTATTGCTA  
TTTTCTGTAGGCAAACAACAACATCTGTACATGGACCAAACAACCCACTTTCATTTTA  
TTGTGCTGCATATATCCAGATTGTTGAGGATTTATTTGTTTAGACTCCGGTGCATTATA  
CACAAGTGTGCATTTTTTGTGTTCTCTGATTGATTGTGTGTTATTTTCTGCAATATGCA  
ATAAAAGTGAGCTGTCTTTCTTTTGTTAATCCCTCCCTACTCCAATAAAAAATCCCTA  
CCCCTAAAATCTGTTTGTGCTGGTTTTATTAATAATTGCGCTCTTTTATATAATAAGTAC  
TATTAATACCCGACCCGTTGTGGCTAATCCCTTATGGTATTTAAAGACTACACCTACAG  
GATGTATTGCTCTTCATTGTTTATGGTTTACCGCGCTCCAAGACGGTTTGCCCAAAGACG  
GTTTGCCAAACCGGTTAGGACTTGTTCAATTTGCTGCCAAACTTATCTGGTCGTGCTC  
CAACGGGTTTTCTGCCAAGCACCTAAAACGGTAGGTGTGTACTCTTTTCAAGAATTAACA  
AAGGAGATTTCTCCCGCAAATTAGTTTCGAGCGACCGAATTTCGGTCGTAAAAATCTAAA  
GTGATGATTGTTGTT

>gi|9626032|ref|NC\_001352.1|\_Human\_papillomavirus\_-\_2,\_complete\_genome

ATAATGTATAACTATAATCCTTTATTTAAAAATAGGGTGTGACCGAAAACGGTCAGACCG  
AATTCCGGTTGTATATAAACAGAAGCAGGATGCACACAAGGGCAGGGATGTCTGAGGAGAA  
TCCATGCCCTAGGAACATCTTTTTGCTTTGCAAAGAGTATGGTTTGGAGCTAGAGGATTT  
GCGATTGCTCTGTGTATGGTGCAAACGGCCGTTATCAGAGGCTGACATATGGGCATTTGC  
AATAAAAGAACTGTTTTGTAGTGTGGAGAAAAGGGCTTCCCATTTGGAGCCTGCGGAAAATG  
CCTGATTGCAGCAGGAAAACCTTAGACAATACAGACATTGGCATTACTCATGCTACGGAGA  
CACAGTGGAGACTGAGACAGGAATACCCATACCTCAGCTGTTTATGAGATGCTATATTTG  
CCATAAGCCCCCTGAGCTGGGAGGAGAAAGGAGGCATTACTAGTTGGAAAACAAGCGTTTCCA  
CAACATATCAGGCCGGTGGACGGGACATTGCATGAACTGCGGGTCATCATGCACGGCAAC  
CGACCCAGCCTCAAGGACATTACACTAATATTGGATGAAATACCCGAAAATTGTTGACCTA  
CATTGCGACGAGCAATTTGACAGCTCAGAAGAAGAGAATAACCATCAACTGACAGAACCA  
GATGTGCAGGCCTACGGGGTGGTAACTACCTGCTGTAAGTGTGGCAGAACCGTCCGGCTG  
GTGGTTGAGTGC GGACAAGCAGACCTAAGAGAGCTGGAACAGCTGTTCTTGAAGACGCTG  
ACTCTAGTGTGCCCTCACTGCGCCTAGCGTTATGGAGGATTCCGAAGGTACCGACGGGAC  
CGAGGAGGACGGGTGCCGGGCAGGGGGGTGGTTTTCATGTGGAGGCCATTATAACACACGG  
CCAGAGGCAGGTATCCAGTGACGAGGACGAGGACGAAACAGAGACAGGGGAGGATTTAGA  
CTTTATAGACAATAGGGTTCCCGGAGATGGGCAGGAAATTCCCTTGCAGCTATATGCACA  
ACAAACCGCTCAGGATGACGAAGCAACAGTGCAGGCCCTAAAACGAAAGTTTGTGGCCAG  
TCCTTTGTCTGCATGCTATGCATAGAGAATGATTTAAGTCCAGATTAGATGCAATCTC  
CCTAAACAGAAAGTCAGAAAAGGCGAAGAGCGCTTATTTCGAGACAGAACCACCAGACAG  
TGGGTATTGGCAATACGCAGATGGTTGTTGGAACGCCAGAGGAGGTAACGGGGGATGAGGA  
AAGCCAAGGGGGGCGGCCGGTGGAGGATCAGGAGGAGGAGCGTCAAGGGGGAGACGGAGA  
GGCAGATCTAACTGTACACACTCCACAGTCAGGAACAGATGCGGCGGGTAGCGTGTGAC  
CTTACTAAGAAGTAGCAATCTGAAGGCGACGTTGCTGAGTAAGTTTAAAGGACCTGTTTGG  
GGTGGGATTCTATGAACTGGTCAGACAGTTCAAAAGCAGCAAGACAGCATGTGCAGACTG  
GGTCGTCTGCGCCTATGGTGTGTATTATGCTGTAGCGGAGGGTCTAAAAGAAATTAATACA  
GCCACATACACAATATGCACATATACAGGTACAGACCAGCTCGTGGGGCATGGTGGTCTT  
TATGCTGCTGCGATACAACCTGTGCAAAAAACAGGGACTCAGTGTCCAAGACATGAGCAT  
GCTGCTAAACATTCCCGAAAAGCATATGCTCATAGAACCACCAAACTGAGAAGTACCCC  
TGCCGCTTATACCTGGTACAAGACGGCCATGGGCAACGGAAGTGAGGTATATGGGGAAAC  
ACCAGAATGGATTGTTAGACAGACGTTGGTAGGACATAGCATGGAAGACGAACAGTTCAG  
ACTGTCAAGTTATGGTACAGTATGCATATGACCATGACATTGTAGAGGAAAGTGTGCTTGC  
ATTTGAGTATGCACAACCTAGCAGATGTGGATGCCAATGCAGCAGCATTCTTAAACAGTAA  
CTGTCAGGCCAAGTACGTGAAGGACGCAGTGACAATGTGCAGGCACTATAAGCGTGCAGA  
GAGAGAACAGATGAGTATGTACAGTGGATAACATTTCAGAGGAAATAAGGTATCAGAGGA  
AGGGGACTGGAAGCCCATAGTCAGGTTTCTAAGACATCAAGGGGTAGAGTTTGTGTCTGTT  
CCTAGCTGCCTTTTAAATTGTTTCTTAAAGGCGTGCCAAAGAAAAAATTGTATAGTGTCTA  
TGGACCTGCAGACACAGGCAAATCATATTTTTTGCATGAGCTTGTTCAGTTCCTAGGCGG  
CGCTGTTATCTCATATGCTAATTCTAGCAGCCATTTTTTGGCTTCAACCTTTATCAGATAG  
TAAGATAGGGTTACTGGACGACGCAACACCCCAGTGTGGAGTTACATAGATATATATTT  
AAGAAATCTTTTGGATGGACACCCAGTGAGCATAGACAGAAAGCACAAAACCTTGCTGCA  
GCTTAAGTGTCCACCCCTAATGATAACAACCAACACCAATCCTCTAGAGGAGGACAGATG  
GAAATATTTGCGCAGCAGGCTGACAGTGTTCATTTAAGAATCCATTTCTTTTGCAGG  
TCCGGGAGAGCCCCGTGTAACCGATAAATAATGCAAACTGGAAATGCTTTTCCAAAGGTC  
GTGGTCCCGCTTAGACCTAAACAGTCCAGAGGAGCAGGACGACAATGGAAACACTGGCGA  
ACCGTTTAGATGCGTGCCAGGAGACGTTGCTAGAACTGTATGAAAAGGATAGCAACAAAC  
TTGAGGATCAGATTAAGCATTGGGCGCAGGTCCGGCTAGAAAATGTCATGCTGTTTAAGG  
CCCGAGAATGTGGAATGACACGAGTCGGCTGTACAGCTGTGCCTGCCCTCACCGTGTCAA  
AAGCTAAGGCATGTGAGGCCATAGAGGTACAGCTGGCATTACAGACATTGATGCAGAGTG  
CCTATAGGCACGGAGGCATTGGACCTACGAGACACGTCGTCTGGAGATGTGGGACGCACCTC  
CAAAGAAATGCTGGAAAAAAAAGGACAATCAGTATTAGTGAAATTTGATGGCAGCAGTG  
ACAGAGACATGATATATACAAGCTGGGGATTCAATTTATGTGCAGGACACTATCACTGATT  
CCTGGCATAAGGTGCCAGGGCAGGTGGACGAACTGGGATTATATTATGTGCACGATGGTG  
TACGTGTTAACTATGTGGACTTTTGGAAACAGAGTCCTTGACCTATGGGGTCACCGGGACGT  
GGGAGGTGCACGTGGCTGGGACTGTTATTCACCATACATCCGCATCTGTGTCTAGCACCC

AGGCCAGCGCCTCGGACGACGAACCACTATCCCCTATTAGAACTGCTGTATCCCCAGTCC  
CAGCCCCAGTCGCAGCCTCAGCAGAATCAACAGGAGCAGGAAGAGCAGCTCCGCCCACCC  
AAGCGTTGTGCTCCGCCCAGGCGCCAACGAGTCCGCGGCCAAGCGCCAGCGTGTTCATCG  
TCGGACAGCAGCATCCCCGGCCCGACTCTACGCGAACGGTCGGAGAGGGGGAAGTGGAGT  
GTTACAACAAGCGGAGCATCAGTGACTCTAACCGCACAGACCCAGGTGGGGCCACGGTG  
ACACTGACTCTGTGCCTGTAATCCACCTGAGAGGTGATGCAAATTGTTTAAAGTGCCTCA  
GATACAGGGTGCAAAAACATAAAGACGTACTGTATGCCAGGGTGTCTCCACGTGGCACT  
GGGCGGGTGGGAACGGTGATAAGACAGCCTTTGTAACACTGTGGTACACCAGCGTTGAAC  
AGCGTACAGAGTTCCTGACAAGAGTCAGTATACCTAAGGGATTGATAGCATTGCCAGGGT  
ATATGTCTGCATTTGTATAATCCTACATGCTTGTATAAACATATGGTCCAATACATTTCA  
AGGCTTGCTCCGCAACACAGCCCTGGACTACTTTCTCTGCGTGGTTGCAGGGTGGACAC  
ATCTGCTTGTGCTACTGCTCTTCCTGTGGCTCTCTCAACTAACCCCCCTTGTGGCCTATC  
TGGTGTCTCTTTTCTGTGTCTATCTGGGGCTGTGGTTGATATATGTGCAGGCCCTTTGGT  
TTTTACCATAGTCGTTATTATTTTCGCCATACGTTGCTGCTAGCTTGTATACATAGTCTAT  
ATACCCATTGTGTGAGATTTGCAATGTACCCTGTTGTGTATAAGGGATCTGAGGGAACAT  
ATCCTGTGGTACTGTGGGGTCATGATGATGTTCAATGTCTGTTGGTGATTCTTATCCTAA  
TCGCCTTTTATTGTTGATGTTTTATGTCCGTTTGTAAACCACACCTAACACCCCCACT  
TTTTTATATTGTTTTGATACATTTTCATTTGATACATTTGTGTTTTTTTTGTATTTGCT  
GCGTTTTTAATAAACGTGCAACCATGTCTATACGTGCCAAGCTCGAAAGCGCGCCTCCCC  
CACAGACCTCTATCGTACCTGCAAGCAGGACGTACCTGCCCCCAGACATTATCCCAAG  
AGTGGAACAGAACACTTTTAGCAGATAAAATCCTTAAGTGGGGCAGTTTAGGTGTGTTTTT  
TGGGGGTCTAGGTATAGGCACCGGCAGCGGCACAGGGGGCGTACTGGGTACATTCCTGT  
AGGTTTCGCGACCCACCCTGTAGTTGACATTGGTCCAACGCCCAGGCCGCTGTTATCAT  
TGAACCTGTGGGGGCTCTGAACCCTCTATTGTCACTTTGGTGGAGGACTCTAGCATCAT  
TAACGCAGGAGCGTCACATCCCACCTTTACTGGTACTGGTGGCTTCGAAAGTGACAACCTC  
CACCGTTACAGACCCCGCGTCTTGGATATCACCCCTCAGGTACCAGTGTGCAGGTCAG  
CAGCAGTAGCTTTCTTAACCCACTATACACTGAGCCAGCTATTGTGGAGGCTCCCCAAC  
AGGGGAAGTATCTGGCCATGTACTTGTAGTACAGCCACCTCAGGGTCTCATGGCTATGA  
GGAAATACCAATGCAGACGTTTGCCACGTCGGGGGGCAGCGGTACAGAGCCTATCAGTAG  
CACACCCCTCCCTGGCGTGCAGAGAGTTGCCGGACCCGCGCTGTACAGTAGAGCCAATCA  
GCAAGTGCAAGTCAGGGATCCTGCGTTTCTTGCAAGGCCTGCTGATCTAGTAACATTTGA  
CAATCCTGTGTATGACCCAGAGGAACTATAATATTTAGCATCCAGACTTGCATGAGCC  
ACCGGATCCTGATTTTTTGGACATAGTGGCGTTGCATCGTCCCGCCCTCACGTCCAGAAG  
GGGTACTGTCCGTTTTAGTAGGTTGGGACGCAGGGCTACACTCCGCACCCGTAGTGGTAA  
ACAAATTGGGGCACGGGTGCACTTCTATCATGATATTAGCCCTATAGGTACTGAGGAGTT  
GGAGATGGAGCCACTGTTGCCCCAGCTTCTACTGATAACACAGATATGTTATATGATGT  
TTATGCTGATTTCGGATGTCCTTCAGCCATTGCTTGATGAGTTACCCGCCGCCCTTCGCGG  
TTCACTCTCTCTGGCTGACACTGCTGTGTCTGCCACCTCCGCATCTACACTACGGGGGTC  
CACTACTGTCCCTTTATCAAGTGGTATTGATGTGCCTGTGTACACCGGTCTTGACATTGA  
ACCACCCAATGTTCTGGCATGGGACCTCTGATTCCCTGTGGCTCCATCCTTACCATCGTC  
TGTGTACATATTTGGGGGAGATTATTATTTGATGCCAAGTTATGTCTTGTGGCCTAAACG  
ACGTAAACGTGTCCACTATTTCTTTGCAGATGGCTTTGTGGCGGCCTAATGAAAGCAAGG  
TATACCTACCTCCAACACCTGTTTCAAAGGTGATCAGTACGGATGTCTATGTACACGCGGA  
CTAATGTGTATTACCATGGTGGCAGTTCTAGGCTTCTCACTGTGGGTGTCATCCATATTACT  
CTATAAAGAAGAGTAATAATAAGGTGGCTGTGCCAAGGTATCTGGGTACCAATATCGTG  
TATTTACAGTGAAGTTGCCAGATCCAAATAAGTTTGGCCTGCCCGATGCTGATTTGTATG  
ATCCAGATACCCAGAGACTTCTGTGGGCGTGCGTGGGAGTAGAGGTGGGCCGTGGGCAGC  
CTTTGGGTGTGGGTGTGCTGGTCAACCATATTACAATAGACTGGATGACACTGAAAATG  
CACACACCTGATACAGCTGATGATGGCAGGGAAAACATTTCTATGGATTATAAACAGA  
CACAGCTGTTTCTTCTGGGCTGCAAAACCCCTATTGGTGAGCACTGGTCTAAGGGTACCA  
CCTGTAATGGGTCTTCTGCTGCTGGTGACTGCCCGCCCTCCAATTTACTAACACAATA  
TTGAGGACGGGGATATGGTTGAAACAGGGTTTCGGTGCCTTGGATTTTGCCACTCTGCAGT  
CAAATAAGTCAGATGTTCTTTGGATATTTGTACCAATACCTGTAAATATCCTGATTATC  
TGAAGATGGCTGCAGAGCCTTATGGTGATTCTATGTTCTTCTCGCTGCGTAGGGAACAAA  
TGTTCACTCGTCATTTTTTCAATCTGGGTGGTAAGATGGGTGACACCATCCCGGATGAGT

TATACATTAAAAGTACCTCAGTTCCAACCTCAGGCAGTCATGTTTATACTTCCACTCCTA  
GTGGCTCTATGGTGTCTCTGAACAACAGTTGTTTAATAAGCCTTACTGGCTACGGAGGG  
CCCAAGGGCACAACAATGGTATGTGCTGGGGCAATAGGGTCTTTCTGACTGTGGTGGACA  
CCACACGTAGCACTAATGTATCTCTGTGTGCCACTGAGGCGTCTGATACTAATTATAAGG  
CTACCAATTTTAAGGAATATCTCAGGCATATGGAGGAATATGATTTGCAGTTCATCTTCC  
AACTGTGCAAGATAACCCTTACTCCTGAAATTATGGCCTATATACATAATATGGATCCCC  
AGTTGTTAGAGGATTGGAACCTTCGGTGTACCCCTCCGCCGTCTGCCAGTTTACAGGATA  
CCTATAGATATTTGCAGTCCCAGGCTATTACATGTCAAAAACCTACACCTCCTAAGACCC  
CTACCGATCCCTATGCCTCCCTGACCTTTTTGGGATGTGGATCTCAGTGAAAAGTTTTTCCA  
TGGATCTGGACCAATTTCCCTTGGGTGCGAAGTTTTTGCTGCAGCGGGGGGCTATGCCTA  
CCGTGTCTCGCAAGCGCGCCGTGTTTCGGGGACCACGCCGCCCACTAGTAAACGAAAAC  
GGGTAAGGCGTTAGCTCTCAGTGTGCGCATATTTCCCTCTGTTCTACTTTTTACATATTAT  
TTTGTTGTCTGTAATATGTTTATGTTGTTGTTGTGCTTATATTACATGTATACATGTATG  
GTATGTATCCCCTCCCGTATGAATAAACGTGTGTCTGTGTGTGTGTCTGTAACTGTA  
CGTTCTGGTGCACAGATTTCTGCACCCCATCGCCTTGTGTGTAGCCCCCAGTTTCATGCA  
ACCGTTTTTCGGTTGCGTGCAGTTTCGGTTCGGCGCCGTTGCCAACCCAGCTTAATCCTTTA  
ATTGCTCTCATCCTAAAGTGTTATCTGTGCCAGCGACGATGAGTTTGGATTTTGGTTGTT  
TAATGCTTTTTCTTTTCAGTTTTTCTTTTGTGTTGTGCCAGGCCGCGAGAGGGCGTGCACA  
TTCTTAGGCTGATTATCTTAATGTGTTTGGCACATCTTTGTACTGCGTCTGCAGAAAAAC  
CTGCAGACAACAGCACTTTGGGCGCGTCTTTTTCGAGCCAACCTTCACTTGCCAACCTTGC  
CTTGCCGCGCATTTCCAAGAAACACACCTATTCCGGTTCGAATGTCTACTATGTGTGGTTT  
>gi|30315616|ref|NC\_004761.1|\_Human\_papillomavirus\_RTRX7,\_complete\_genome  
AACGGTAAAGTCTCGCCCTTGTAACAGGTGCGGTACGATTTCTCAATAGCTCCTTCAATAA  
CAGGTTGTTATTGCCAACTACCATCATCACTTTCAAGTTTTTGCTTGTATCGTTTTTCGTA  
TCATCTCCTATTTGTATATAATTAATAAAATAATATATATAATGTTTGAGGCTTGGTTA  
TTTTGCAACTGTGATTGGGACAAATGGCTCAGCAGACTACACCAGACCAACAGAAACCTA  
AAGAGGAAAACATTTGAACTGCCCACAACATTAAGAGTTAGCTGACCTCTTACAAATTC  
CTTTAGTTGATTGCTTAGTGCTTGAACCTTCTGTGGAAGGTTCTTAGATTTTTTGGAGG  
TTTGCGAGTTTGACAAAAGCAGCTAACATTGATTTGGAAGACTACTTTGTTTTCTGCTT  
GCTGTGCAAGTTGTTGTGTAGCTACTGCAACTTTCGAATTCAATGAATATTACCAGCAAA  
CAGTTTTAGGTAGAGATATAGAGCTAGCTACAGGAAAGTCAATATTTGAATTGAAAATCA  
GGTGTGAGACTTGTCTATCATTTTTGAGCACCATTGAAAAATTAGATAGCTGTGGTCGAG  
GCCTTCCGTTCCACAAAGTGAGAGACGGCTGGAAAGGAGTGTGCAGGCACTGTAAGCATT  
TGTATAATGATCGGTAAAGAGGTCAGTGTGCAAGACTTTATTTTGGAGCTTAGTGAGGTG  
CAGCCTGAAGTGATAACAGTTGACCTGCTTTGTGAAGAGGAATTACCAAACGAACAGGAA  
ACGGAGGAGGAGTCAAATATCGACAGAACCGTGTTCAAAGTCATTGCACCGTGTGGCTGC  
AGCTTCTGTGAGGTCAATCTTCGTGTTTTTGTCAACGCAACTGAACTTGGTATTAGAACC  
CTGCAGGAACTACTGACCAGCGATCTGCAGCTGCTGTGTCCAGAGTGCCGTGGTAACTGC  
AAGCATGGCGGATCCTAAAGGTAGTACATCTAAAGAAGGGTTAGGTGATTGGTGTATTTT  
GGAAGCTGACTGTAGTGATTTAGAAAATGATTTTGAACAGTTATTTGAGCAAGATGCAGA  
CTCAGATGTATCGGACTTGCTAGATAATGGTGAACCTGGAACAGGGCAATTCCCCTGGAAC  
ATTTTCATCAACAAGAGTGTAAGCAGAGCGAGGAGCAATTACAAATACTAAAACGAAAGTA  
TCTTAGTCCAAAAGCTGTGCGCGAGCTTAGTCCGCGTCTTGAGTTGATGTCATTGTCACC  
TCAGCAGAAAATCCAAGCGAAGGCTCTTTGCAGAGCAGGACAGCGGACTCGAGCTATCTCT  
AAACAATGAAGCTGAAGATAATGCTCCTGAGGTGGAGGTACCGGCTCTAGACTCTGGGCC  
GGTAGACGAGGGAGGAACAGGGGATGTAGATATTGATTATTTAGCCTTGTGCGTTCCAG  
CAACAGAAAAGCCACATTAATGGCGAAATTTAAAGACGCGTTTGGGGTAGGCTTTAATGA  
ACTAAGCTCGCCAGTTTAAAAGCTACAAAACCTGTTGTAATCATCGGGTTTTAGCTGTGTA  
TGCAGTTCATGATGATCTATTTGAAAGCTCAAAGCAGCTGTTGCAACAGCACTGTGACTA  
TATCTGGGTCGGTGGGATAGCTATGACACTTTACCTATTGTGTTTTAAGGCGGGAAA  
GAATCGCGGTACTGTGCATAAGTTACTTACGTCAATGTTAAATGTGCAAGAGCAGCAAAT  
ATTGTCTGAGCCTCCTAAGTTAAGAAATACAGCTGCGGCATTGTTTTGGTATAAAGGTGG  
TATGGGGTCAGGAGCATTTACATATGGTAAATATCCTGATTGGATTGCGCAGCAAACAGT  
ACTTGGCCACCAAATGCGGAGGCAAGCACATTTGATTTTTTCAGTGATGGTACAATGGGC  
ATTTGATAATAATCACGTAGACGAAGCAGATATTGCTTACCAATATGCAAGGCTTGCACC

AGAAGATAGTAATGCAGTAGCCTGGCTTGCTCATAATAGCCAAGCAAAGTTTGTGCGAGA  
CTGTGCAGCAATGGTACGCTTTTATAAAAAATTTACAAATGAGAGAAATGTCCATGTCTGA  
ATGGATATACACAAGGATAAACGAGGTGGAAGGAGAAGGACATTGGTCATCTATTGTTAA  
ATTTTTAGGATATCAAGGAGTTAATTTTATAATGTTTTTAGCAGCATTGAAAAATTTTTT  
GCATGCTGTACCAAAACAGAATTGCATATTAATACATGGGCCTCCTAACTCTGGAAAGTC  
ATCTTTTGTCTATGTCATTGATAAAAGTATTGAAAGGGAGAGTATTGTCTTTGTAAATTC  
CAGAAGTCAATTTTGGTTACAACCTCTTGGAGAGTGTAATTTGCCTTGATAGATGATGT  
AACAGATCCTTGTGGCTATATATGAGACACATATTTACGAAATGGTTTGGATGGCCATTT  
TGTGTCACTAGACTGTAAATACAAAGCGCTGTGCAAACGAAGTTTCTTCCATTATTGCT  
CACATCAAAATATTAATGTGCATGAGGAAAACAAATTACAGATATTTACATAGTAGAATAAA  
AGGATTTGAATTTCCAAATCCTTTTCCAATGAAATCAGACAACACACCTCAATTTGAGTT  
AACTGACCAAAAGCTGGAAATCTTTTTTTGAAAGGCTTTGGACACAATTAGAAGTGAAGTGA  
CCAAGAAGAGGAGGAGGAGGGCGAACATGGAGAACTCAGCGAGCGTTTCAATGTTCTGC  
AAGATCAGCTAATGAACATATATGAAGCTGCAGAACACACACTTGAGACACAAATTGCAC  
ATTGGACACTTTTGCGAAGAGAAGCTGTATTGCTTTACGTTGCTAGGCAAAAGGGTATCA  
CAAGGCTTGATACCAACCTGTGCCTCCATTGGCAGTCTCTGAAGGAAAAGCAAAGGAGG  
CCATAGGGATAATGCTGCAACTGCAATCTCTGCAAAAGTCTGAGTATGCTTCAGAGCCCT  
GGACATTAGTGGACACAAGTGCAGAACTTATAGGAATGCTCCAGAACAACATTTTAAAA  
AAGGCCCAATACCTGTGGAGGTCAATTTATGATAAGGAGTCCGGAATGCAAATGTTTATA  
CTATTGGGAAGTTTGTATATTACATGGATCCAGAGGATGTATGGCATAAACTACAAGTG  
GTGTAAACCACAATGGTATCCACTATTTACATGGTGACTTTAAACACTATTATGTGTTGT  
TTGCTGATGGTGACGTACATATAGTAAACAGGATATTGGGAAGTGAAAGTTAATAAGG  
AAACTGTGTTTGTCTCCTGTACACAGCTCCACACCTCCCGGATCTCCAGGACAAACAGACA  
CAAACACCACCACCAAGGCCCGCCACCTCCTCTGACTCCACGACCAGATCCAGTGACA  
AACAGTCACAACAAGCCGCAACCAAGAGGAAAGGATTCGACGACGACCATCCAGTAGAA  
CAAGGCGACAAGAAACGCAGCAAAGGCGATCAAGGTCGCGATACCGCTCCCGGTCTCACT  
CCCGGTGCGACTCCAGTCCGATACCAGGGCCATTGCCACCTCCCTATCCAGGTCTCTCA  
GGTCCCCGTCGGTCTCCAAGACTAGGAGTCGGAGGTGAGAATCCAGATCACAATCCCAGA  
AGTACCTCCAGCCGAAGGCAGGTGAGGGTCACCCACCGACACCACCAGGCGTCGGA  
GATCCCGATCAAAGTCATCTCCACCTCCACCTCTTCTCTCTCCCAACGGTCACAACGGG  
GAGGGAGAGACAGAGGGGAAAGAGGAAGTAGGAGCTGTAGGGGGTGCGGTAGGGGAACAG  
GAAAGCGACGGGGTAGATCATCTCCACCTCCCCACCCTCAAACGGTCTCGACCAAAGT  
CTAGCAGGCTCCGTGGCGTGTCTCCTGACGAAGTGGGAAGATCTCTTCAATCTGTTAGTT  
CAAACATAGAGGAAGACTTGGGAGATTATTGGAAGAGGCTCTCGACCCCCAGTAATAC  
TTTGCAAGGGGGGGGCAAACACATTAAAATGCTTTCGCAACAGAAGTACAGGGAAATACA  
CGGGGCTGTTTCAGAGCCATTAGCACAAATGCTCTTGGGTGGCTGGAGATAGCACTGAGC  
GTCTAGGCAGGCCAGAATGCTCATTAGCTTTTCTTCAGATGGTCAGAGAAAACATTTTG  
ATGAGACTGTGAAATATCCGAAAGGGGTTGAGACATCATATGGCAACTTGGACAGCCTAT  
AACACTACTAACATTGCTTTTGTACTAACCACCTAACATTACAGAAATAGTATAGTTTA  
ACATTTTTTTTACTTTTTTATTGCTATGGTGCGTGCTAAGCGGGTCAAGCGGGTCAAGCGT  
GACTCTGTAATCATATATACCAAACCTGCAAACAAGCAGGCACTTGCCCCCTGATGTT  
CTTAATAAAGTGGAGCAAACAACAGTTGCTGACAATATTCTTAAATATGGCAGTGCTGGT  
GTATTTTTTTGGAGGCCTGGGCATAGGAACCGGCCGTGGTACAGGAGGCGTGACAGGGTAC  
ACGCCACTGTCTGAAGGGCCTGGTATCCGTGTTGGTGGTACCCCCACAGTTGTACGGCCC  
TCACTTGTCTCTGAAAGTATTGGTCCAGCAGATTTGCTGCCAATAGACACTATCAATCCT  
GTGGAGTCCACTGCATCATCGGTGGTCCCATTTGACTGAATCTTCAGCAGCTGATTTGCTT  
CCAGGGGAAGTTGAAACAATAGCTGAGATACATCCTGTTCTCTGAAGGTCCCATAGTTGAC  
TCGCTGTGTGTGACCACAGCAGAGGCTCAAGTGCCATACTAGAGGTTGCTCCAGAGCCT  
ACACCACCTACACGTGTTGTTGTTGTCGTCACGACACAATATCATAACCCATCTTTTCAAATA  
TTAACAGCAATCAACACCTACTCAGGGTGAAAGTTCTTTTAGCAGATCATATATTAGTTACA  
TCTGGTTACAGGGGTCAAACCATAGGTGGTAAATGTTACAGACATTATTGAGTTACAAGAA  
TTACCCAGTAGATATTCTTTTGAATAGAAAGAGCCAACCTCCACCACGGCGCAGTAGCACA  
CCACTTCAAAGAGCACTATCCATTGGCAGGCGTAGGGGGCCTTCTCTAACAAATAGAAGG  
TTAGTTTACAGCAAGTACAAGTAGACAATCCTTTATTTGTTTCTCGACCATCCAAATTAGTA  
AGGTTTGCTTTTGATAATCCTGTATTTGAGGAGGATGTTACAAATATTTTGTAGCAGGAT

GTAGATACGTTTGAAGAGCCCCCTGATAGGGATTTTTTTAGACATTTCGCAAACCTGGGACGA  
CCCCAATACTCAACAACACCTGCAGGTTATGTTAGGGTAAGTCGACTCGGCACCCGGGCC  
ACTATTTCGCACACGTTTCAGGTGCTCAAATAGGATCTCAAGTACATTTCTATAGAGATTTA  
AGTTCAATAGATTCTGAGGACCCTATTGAGCTACAGTTATTAGGTCAACATTTCTGGGGAT  
GCGACCATCATACAAGGTACTGTGGAAAGTACGTTCATAGACATGGATACAGCAGAAAAT  
CCTTTGTCTGAGAGTATTGAGGCGCATTCTAATGATCTGCTACTTGATGAAGCTGTTGAG  
GATTTTAGTGGCTCTCAATTAGTTATAGGAAATAGACGTAGTACTACATCATATACTGTC  
CCATGGTTTTGAAACAACAAGAAACAGCTCCTATTATGTGCAGGACACACAAGGTTATTAT  
GTGGCTTATCCTGAGAGTCGAGATACTGCAGAAAATAATTTATCCTACACCAGACATTCCC  
GTGGTGGTCATTCATACCCATGATAGCAGTGGTGACTTTTATTTGCATCCTAGTCTTCGA  
CGGGCAAGGGTAAGAGAAAATATTTGTGATTTGCTTACAGATGGCTGTGTGGCATTCGGC  
TAACGGTAAGGTCATCTACCACCATCAACACCAGTGGCCAGGGTGCAAAGCACGGATGA  
ATACATTCAAAGAACAACATCTACTATCATGCCAATACTGACAGACTGCTCACTGTAGG  
CCATCCATATTTTAAATGTGTATGATAATACTGGGAAAAAATTGGAAGTCTCTAAAGTATC  
AGGAAACCAACATAGGGTATTTTCGTTTGAAATTACCAGATCCAAACAGATTTGCTTTGGC  
TGACAAGTCTGTATAACAACCCCGATAAAGAAAGGCTGGTATGGGGTTGCAGAGGGTTGGA  
AATCAGTAGAGGACAGCCTTTGGGAGTTGGCAGTACTGGACATCCATATTTAATAAGGT  
AAAAGACACGGAAACACTAACAATTATACCACAGGCTCTACAGATGATAGGCAGAACAC  
ATCTTTTGACCCCAAACAATTCAGATGTTTATAGTAGGTTGTACACCTTGTGTGGGAGA  
GCATTGGGAAAAGGCCCTTACCTTGTGGAGATGCGCCTGCAGATAATGGTATTTGCCCTCC  
AATTGAATTAATAAACACTTTTATTGAAGATGGAGACATGGCAGATATTGGTTTTTGCGAA  
TATGAATTTCAAACCTTTACAGCAGAATAGGGCTGATGTGTCAGTCTGGATATAGTTAATGA  
AACTTGCAAAATATCCAGACTTTTTTGAAAATGCAAAATGATGTCTATGGCGATGCGTGTTT  
TTTCTATGCTCGCAGGGAGCAGTGTTATGCCAGACATTTTTTTTGTAGGGGGCGCAAGAC  
AGGTGACAATATTCCTGACGCATATATTGATGATGGCAATATGAAAAATTCTTTTTTACAT  
ACCAGCAGCTTCAAATCAATCTCAAAAGGATATTGGTAATGCTATGTATTTCCCAACAGT  
CAGTGGCTCACTAGTCTCTAGTGATGCTCAATTGTTTAAACAGGCCCTTCTGGCTGCAAAG  
AGCACAGGGTCATAATAATGGCATTCTGTGGGCTAATCAGATGTTTGTACAGTTGTAGA  
CAACACGCGAAACACCAATTTTCACTATATCTATATCTAGTGAAAATCAAGATATACAGCA  
AATACAATCATATGACTCACAAAAGTTTAGGGAATATTTAAGGCACGTAGAAGAATATGA  
AATTTCTATTATTTTACAGTTGTGTAAAGATTCCTACTACAAGCAGAAGTTTAGCACAAAT  
AAATGCAATGAACCCCTCCTTACTAGAGGATTGGCAGTTAGGATTTGTGCCAACTCCCGA  
TAATCCTATCCAGGACACATACAGATTTATTGATTCCTTAGCTACCAGGTGTCCCGATAA  
AAATCCACCAAAGGAAAAACCTGATCCTTATGAAAAATTAACATTCTGGAATGTAGACCT  
AACTGAAAGATTATCTTTAGACTTGGATCAATATTCCTTTAGGTCGCAAGTTTTTGTTCGA  
AGCTGGATTGCAGCAAACGACCGTTAACGGTACAAAGCCTTCAACGTATAGAAGTTCTGT  
ACGGGGGATCAAAAAGAAAACGCAAAAACCTAACAATTACCGAATTCGGTACATTTGTATCA  
ACTTTTACACAGTATTCAAGGAATGTCTGTTTACTCTGACTAAGTATAACTCTACCTAGG  
AAACCAACCGCGCCCGGTACATAAAGGTGAGTTGGTGCCAAATTAGATTCAGTGTGGTGC  
CAAGACATACCGTGTGGTTCTAACATGCTCGGATTAGGTGACCGCCAAGGAACCTTTA  
GTGTGCCAATAGCTTACAGCAGTCCAGATTTGGCACATTTTGTGGACCGAT

>gi|22138122|ref|NC\_004104.1|\_Human\_papillomavirus\_type\_90,\_complete\_genome

ATGACCAACGGAGACTACTGCCCAAGAAATATCTTCCTATTGTGCAAAGTCTATGAAGT  
GACCTGCAGGACCTGAACATAACCTGCGTGTTTTGCGGAACAGCATTAACAGAGGAGGAG  
GTTGTATCGTTGCATACAAGGAGCTACAAGTTGTGTGGAGAAAGCATTTTCCATTTGCA  
GCATGTCTGCGTGTCTGGAAGCAGCCGGGAAACTAAGGCAATTTAGATACTGGCAGTAT  
TCTAGCTATGCACCCACAGTGAATATGAAACAGGAGTGCCTATTTTAGAATTGCTTATT  
AGATGCTACCTGTGCCATAAACCAGTGTGTCAGTGAGGAAAAGGAACGGCTTATCAGTGAA  
GGCAAAACGGTTCCATAAAATAGCTGGGCTTTGGCGAGGCGCTTGCCCTGCAGTGTGGGAA  
CCATGACATGGCCAACGACCAACCTTAAAGGACATATTTCTAGAGCTGGATCAGCCTGATG  
CGGTTGACCTACATTGTAACGAGCAATTAGCCAGCTCAGAAGAGGAGGATAATAGGGAGG  
ACGGTGAGCAACCTACACAACCTACAGAACCAGCACAGCAAGCATATAGGGTGGTAACAA  
GTTGTTGTAGGTGTTGCTGTACAGTAAGGCTGGTGGTGGAGAGTGACACGCGAGAAATAA  
GACAACTCCAGGAGCTTCTGTTGGGCGCACTGCATATAGTGTGTCCGCTCTGCGCATAA  
TGCTATGGCCGACGGTGAAGGTACAAACAATGGGGACGATAGTGAGGAGGGACGGAGCGC

ATGCGGGTGGTTTTGGGTGGAAGCCACAGTGGACAGAACCACGGGACAGCAAATATCTAG  
TGATGAGGACGAGGAGGACGGTGACAGCGGACAGGACATGGTTGATTTTATTGATAATAG  
TAGGCATCCCGGGGATGGACAGGAAGTTGCAC TTGAGTTATACAGACAGCAGGAGGCACA  
AGATGACGAGGCCCTTTGTGCAGGCCCTAAAACGAAAGTATCTAGCTAGTCCGTTGGCCGC  
CGGGGTATGTGTAGACAAAGACCTAAGTCCACGGCTGGATGCCATAACACTAGGCAGAAG  
CTCACAAAAAGCAAAACGTAGACTGTTTTGAGCTGCAAGACAGTGGGTATGGCAATACGCA  
AGTGGATATTGACGCGACAGAGGACCAGGTAGTAGGGGAAAGCAGGGGGGGTGCAGGCAC  
AGGGGGGGTACAGGAAACGGAGGAGGAGGAGCGACAAGGGGGGGATGGTGCGCCGGGTGC  
AGTTACAGCACCCGGCACAATCAGGTACAGATGCTATCCTGTCTCTGCTTAAAACAAGTAA  
CCTAAGGGCCACATTACTAGGTAAGTTTAAAGATATATATGGGTGTCTTTTATGGAGCT  
AGCAAGACAGTTTAAAAGTAATAGGACCACGTGTTTGGACTGGGTAATATGTGCATTTGG  
CGTGTACTGCACAGTTGCAGAGGGTGTCAAAACCCCTTATACAGCAACACTGTCAATATGC  
ACACATACAGGTGCAAACCAGTAACTGGGGAATGGTGGTCCTAATGCTAGTGAGATATAA  
TTGTGCCAAGAACAGGGACACGGTGGCAAAATGTATGGGCAGGTACTAAATATACCAGA  
GCAACATATGCTCATAGAACCCTCCCAAAATAAGACATCCAGCGGCTGCACTATATTGGTA  
TAAAGCAGGCATGGGCAATGCTAGTGAAATAATTGGAGAAACACCAGAATGGATTGTAAG  
ACAAACAGTTGTGGGGCACAGTCTAGAAGAATGCCAGTTTCAGTTATCAGTAATGGTGCA  
ATGGGCATATGACCATGATATAACAGACGAAAGTATATTGGCATATGAATATGCAAAATT  
GGCAGATGTAGATGGTAATGTGCAGCGGCATTCCCTAGCAAGCAACTGCCAAGCAAAATATGT  
AAAGGATGCATGCACAATGTGCAGGCATTACAAACGGGCAGAGCAGGCACAAATGACAAT  
GTCAGAATGGATAAGATTTAGAAGTGCAAGATATCAGAGGAGGGCGACTGGAGACCCAT  
AGTACGGTTCCCTAAGACACCACGACATAGAGTTTATTACCTTTGTAATATCGCTGAAAAA  
CTTTTTTAAAAGGCATACCAAAAAAATGTTGTATAGTAATATATGGACCTGCAGACACAGG  
TAAATCATACTTTTGTATGAGCCTGTTGCGCTTCCTAGGAGGGGTGTGATTTCCCTATGC  
CAACTCCACCAGCCATTTTTGGCTGCAGCCATTATGTGATGCCAAAATAGGGCTTATAGA  
TGATGTTACCCCCAGTGCTGGAGCTATATAGATACCTATTTGCGAAATGCACTGGATGG  
CAATCAGGTATGCGTAGACAGAAAACATAGGCCCTTTGCTGCAGCTAAAAATGTCCACCCT  
GTTAATGACAACAAATACCAATCCCTTAGAGGAAGACAGGTGGAAATTTTACGTAGTAG  
ACTGCAGCTGTTTACCTTTTCTAATGCATTTCCCTGTAAATCAGAAAGGGATCCCTTGTA  
TACACTAAATGATGCAAACTGGAAATGCTTCTTCCAAAGGTTGTGGGCTCGGTTAGACTT  
ACACGAGCAGGACGACCAGGAGGACAATGGAGACATTGGCCAGCCGTTTAAATGCGTGCC  
GGGAGAAGTTGCTAGAACTGTATGAAACAGATAGCGACCAGCTGCAGGACCAAATTATGC  
ACTGGGGACTTGTGCGATTGGAAAATGTTATTATGTATAAGGCACGAGAAGCGGGAATGT  
TGCACCTAAACCACCAGGTGGTGCCAGTGCAATTGATTGCAAAAGCAAAGGCATGTAAAG  
CTATTGAAATGCAGTTGGCATTAAAGACATTGCTAAAAAGCCCCTATGGCACGGAACCTT  
GGACATTACGTGACACAAGCCAGGAAATGTGGGACGCAGCACCCAAGCAATGTTGGAAAA  
AAAAGGGCTACACCGTAGACGTTAAGTTTGATGGCGAGGACACAAAAACTATGTGCTACA  
CATGCTGGAGGTATATATATGTACAAAAGCGGTGATGATGATACATGGACCAAGGTGTCTG  
GCCATGTGGACCATGCAGGACTATACTTTACACACGAAGGGACACGTGTAACCTATGTTA  
GGTTTGCACAGGAAGCACAGACATATGGGAACACTGGCACCTGGGAGGTGCATGTGGGAG  
GACAGCTAATTTATGATGCATTCGACTCCTCTGTGTCTAGCACCCAGGACACCGACCAAG  
AACCGCTATCCTCTACTAGACCTACTGACCCCCCATAACCGACGAACCCGACGCCACCA  
ACCCCGCCCAGGTGTTGGGCCCCGCGTCGCCACACGTGCCGCCGCCGCATAAGCGTCAGC  
GACTCGGACACGGATATCAGCATCCCGACTCCACAGAAGACAGGATCCAGCGGCTGGCAC  
GTGACAACACAGGGGACCAGTGTAACCTTGACAGCGCAAAGCAGCACGGGAACATCCGTG  
TCGGTGACAGTGCACCTGTAACACACCTCCGAGGTGATCCAAACAAATTAAAGTGTTTAA  
GGTATAGATTGCACAAACATAAATCTGTACTGTTTAGCAAAGTAACCTCCACCTGGCGAT  
GGTCAACGTGCAGTAACACCACCAATGAAAAATCAGCCTTTGTAACCCCTGTGGCATGATA  
GTGCGGAACAAAGGGCAACCTTCCTATCAACCATAACCTTACCTAAAGACATTGAAGCAG  
TACTGGGGTACATGACTATGTTAGCATAATATACCTGGTATATTGTAAATATATGTAACT  
GTGTACAGTGCAGAACGTTAAGGGACATCTGTTGTATACAGTGTGGAGACCTTTATTTGC  
TACTTGTCTGCCTGGACACAACCTGCTGCTAATACTAATCTTCTTTTGGCTGTCTATCCTT  
CCTGGCGTTACTGCTTTTTCTTATTGTATTTCCTTACTGTGTTTCTAGGCCTCCTGATCATA  
TACATACAGGCGTTGCAGTCCCTTGACCAACTGTGATATCACCACACAACCAGCCAAGCC  
TGCTGCTCAATTGTATATATTTCCTCTTGTGTTGTAGTGTGCAATAGTAGTATGTATCCTG



TTGTAGTACGTGATAGAGATGGGGGGGAATATCCTGTAGTACTGTGGACACCTGCAGATG  
TGCAGGTGTTATCCCTGTTGTTGCTTTTCGTGTGTCTTATTTTGTATTATTTTACCTGC  
GTCTGTTGCAGTAGTTACCTTACCCATTGTACCTATATGTATTGTATACACAGTGTATGT  
AGACACATGTAGTGGGTTTGTGGGTGTCATACATTTATTGGGTGTGGGGTATTCATTATA  
GTGGTGTGGTTTGGTGTTTTGTTTTGGCTTTTGTATGGTTTGTATTTTCATTTTTTT  
ACATTATATTGCTAAATAAATTTTAGTATGCATCGCTCTAAACGTCGCAAGCGTGCCTCC  
GCTACCCAATTATATCAAACCTGCAAATTGGCAGGTACCTGTCCCTCCGATGTGATCAAT  
AAGGTGGAACACACCACACTTGCAGACAAAAATCCTGCAATGGGGTAGCTTGGGTGTCTTC  
TTTGGGGGTTTGGGCATTGGAACAGGGTCCGGCACTGGTGGGCGCACTGGATACATCCCT  
ATTGGGACCCGACCCCCCACTGTTGTGGATGTTGGCCCTCCTGCCCCCCCCCTGTCGTT  
ATTGAACCCGTGGGGGCATCCGATCCTTCTATTGTACATTGGTGGAGGATTCCAGCATA  
ATTGCATCGGGCTCTCCCCATCCCACATTACAGGTACCGGGGGGTTGAGGTTACAACA  
GCCTCTACCACAACCCCTGCAGTGTGGACATAACTCCATCCGGTGGCAATGTGCAGGTT  
AGCAGTAGTAGCTTCATTAATCCTTTGTTTACTGAGCCTGCTATAGTGGAACCTCCGCAG  
GCAGGAGAGGTAACAGGCCATGTTTTAGTTAGTACCCCTACAGCTGGATCCCATGGCTAT  
GAGGAAATCCCTATGCAAACCTTTTGTGTACGGGGTACTGGTGTGAACCTATTATTAGT  
ACCCCGTTGCCAGGGGTCCGTGCTGTGGCTGGGCCCCGGTTGTACAGCAGGGCATAACCA  
CAAGTACATGTACAGGACCCAGGTTTTTATCACAGCCTGAAACACTTGTACCTATGAC  
AATCCTGTATTTGACACAGGAAACCATACTATTTGAGCATCCTAGTATTCATCAGGTC  
CCGGATCCTGACTTTTTTGGATATTGTGGCTCTACACAGACCCGCCCTTACTGCACGCAGG  
GGTACCGTCCGTCACAGCCGTCTGGGTGAGCGTGCCACATTAAAAACCCGAGTGGCAAG  
CGCATAGGTGCCACAGTACATTTTTATCAGGATTTAAGCCCTATTGCACCTGTTGCTGAC  
GAGCTGGAATGCAACCTTTGGTTTCTGACACTCCTGATTATCTTGATTCTCTATATGAT  
ATATATGCTGACACTGCTTCTGTGTCCCGTCACCGCACCTTGACCCCTACACGCCCCCTCC  
ACACCTTTACAGGCTCCATCAGTGACTGCATCGTCTGCCCTATCATCTGCAGCATCCAAT  
ACCACTGTGCCCTCTATCTACAGGCCTGGATATTCCTGTCTTTAGTGGGCCTGACAGTGCC  
CTCCCGGATTCCCATGCTGTTTGGCCCGTGCCCCCTGCCCTCCCGGTGTTGTTCCCTGGC  
TCTGTTCTTGTAATGGGTCCACATATTATTTGTTGCCCCCATTAGGTTTGCTACCTAAA  
AAACGTAAACGTTTTCCATATTTTTTTGCAGATGGCAATGTGGAAGCCTAGTGACAACAA  
GGTATACCTGCCTCCTGCCCTGTGTCCAAGTCCCTCAGCACCGACGCCTATGTATCCAG  
AACAAACATATATTATTATGCAGGCAGTTCCCGACTGTAACTGTTGGCCATCCTTATTT  
TGCTATCAAAAAGCAATCAGGAAAAAACCTATAGTGGTTCCCAAGGTGTCTGGATATCA  
ATATAGGGTGTTTAGGGTACGTTTGCCTGATCCCAATAAGTTTGGCCTTCCTGATGCATC  
GCTATACAATCCTGACTCGCAGCGCCTTGATGAGGCTGTACAGGTGTTGAGGTTGGCAG  
GGGACAGCCTTTAGGCGTTGGGGTAAGTGGCCACCCGTTGTACAACCGCCTGTATGACAC  
TGAAAACACCAATTTATATGATGTTGTGCTGGCGATGACACCCGGGACAATCTTACTAT  
GGACTATAAGCAAACCCAGCTATTTATTATAGGGTGCAAACCTCCTTTAGGCGAGCACTG  
GGCAAAGGGTACCCCATGCAATATGTCTAATGTACAGGCTGGGGATTGCCCTCCTATAGA  
ACTTAAATCTTCCACAATTCAGGATGGGGACATGATAGATACTGGTTTTGGTGCTCTTGA  
TTTTGCAGCGTTGCAAACCAATAAGTCTGATGTGCCTTTAGATATTGTAACCACTACATG  
CAAGTACCCTGATTTTTTGCAGATGGCAGCTGAGCCATATGGTGACCTTATGTTTTTCTG  
TTTACGTAGGGAACAGATGTTTATAAGGCACTTTTATAACAGAGCAGGTACTATGGGCGA  
CGCAATTCCCGATGGCTTTGTGCTAAAAGGAACATCTTCTACCTCTCGTGGCACTCCTAC  
AAGCTCTGTATATGGGTCCACGCCTAGTGGGTCCATGGTTACCTCTGAATCCCAGTTGTT  
TAACAAGCCCTACTGGCTGCAACGAGCACAGGGCCCTAACAATGGTATCTGCTGGGGTAA  
TCAGCTTTTTGTAACGTGTGGTTGATACTACACGTAGCACCAATATGACTATTTGTGCCAC  
ACAAACACCCCTCTGACACATAACAAGGCTTCCAATTTTAAAGAGTACATGCGCCATGGCGA  
GGAATTTGATTTGCAGTTTTATTTTCCAGTTATGTGTTATTAATTTAACTACAGAGGTTAT  
GGCCTACTCTGCATGATGAATGCTACGTTACTGGAAGACTGGAATTTCCGTTCCCTTGCC  
CCCTCCCACCTAGTGTGGGCGATACCTACCGGTTCCCTACAGTCCCAGGCTATTTCCCTG  
TCAAAAACCTTCTGCTGTCCCTACAGAGAACAAGGACCCTTATGCAGGGCTTACATTTTG  
GGAGGTGGATTGTCTGAACGTTTTTCCCTTGAGCTAGACCAATTCCCTCTTGCCAGGAA  
ATTTTTGCTGCAGCGTGGCACCCGGGTACGGTGTGCTCCCTGTGTCCCGCAAGCGTCCCGC  
ACCCTCTACCGCCCCCTCTACAAAACGTAAACGGTCCAAACGTTCCCTAAGCATGTTATGT  
GTGTGTCTGTTGTATGCTGATGTTTACTGTGTCTGTACACGGGTTCCTTGTACTGTTGTG

TATGTATGGGTGGCCCCCTTTTGTATGTATGTTTCCTTATGCATGTTTGTGTGCATGTT  
TTGTATGTTAATAAATGTGTGTGTGCATGTGTTGTGTGTGTCCGGTTGCGCCTTGTGAGTC  
ACATAACATATATGTGTGGTGTCTGTATGTGACCCGGCCGTCCCCTAGCCTTTAATACC  
CCCGGACCGATTTTCGGTCGCTCCCGGTTTCGGTCGTGCACAACATGGCGTTTGTGGCA  
CTGTTTGCAAACTGTTAGCTGTTTCGCGCCACATTTTGCAGGTGTGCATGCTTGTCTAG  
GGTGTGCCTGACAGTTAGTTGGCCAGCTATACATTTCTTTCACAATATTTATTGTCTGTG  
TTACTCACACTCCAATAAATATACTTTTAGGCACATAGTTTTATGCTGACTGCTTTCCT  
TAAGTGCTTATCTGGCAGGCAAATTTGCTTTTCTATTCAACAATGTGTCTTGTAAATCCT  
ACTGTACAACCTTCAAACATGTTTGTAGCACACCTAATCCGGTTGCTTCCCCTGTACATCT  
TACTCATTATTATAAACTATAATCGTTCTATTACAAAATAGGAGGGACCGAAAACGGTCC  
AACCGAAATGGGTACATATAAAAAGGATATGTTAACTTCAGCACAAAATAGCC  
>gi|9628437|ref|NC\_001676.1|\_Human\_papillomavirus\_-54,\_complete\_genome  
TAACTACAACCATGATTTATAAAATAAGGGAGGGACCGAAAACGGTTCAACCGAAACCGG  
TACATATAAAAGCGGTTGTAGAAAACAGTTATTTGGGGGCAATGTCTGCTACTGAACCCC  
ACACGGACCAGCCGCTACTCTAGCTGATTTGTGCAAGGTATGCAATATTCCTATGCATA  
GTTTGCAACTTCCCTTGTGCCTTTTGAAGAAGACGGTGTGTACAGCAGAGATTTATGCAT  
TTCAATATAAGGACCTATTTGTGGTGTGGAGACACGGCTTTCACATGCTGCATGTGCAC  
TGTGCCTAGAACTGCACGGGCAAATAAATTATAGAAGGCATCGCGACCGTGCGTGCCTGT  
GGGAAACAGTGGAAACAAGGTGTGGAAAGCCATTGGAAGAAATATTTATAAGGTGCTGGC  
TGTGCCATAACCTTTGTGCAACGTGGAAAAGCAACGGCACGTAGATTACAACAGGCGAT  
TCCACTGTGTTAGAGGCTATTGGAAGGGTAGGTGTCTACATTGCTGGAAGCCATAATGCA  
TGGAAATGTGGCTACAATTGAGGATATAGTCCCTTGATTTAAAACAGAACCGTTTGACCT  
GTACTGCAGGGAGCAATTAGAAGACTCTGATGCAGAAGATGAGACAGCAGTAACACAACC  
TGACAAAACAAGCATTAAAGGTGTTAAGCCAGTGTGGAGGTGTGTGTTGTAAGACAGTACG  
GCTATGTGTGTATAGCACGCACACAGGCATAAAGGTACTGCAGGAACTGCTTCATCAGGA  
CGCACTGCAAAATAGTGTGTCCCACCTGTGCTTCACGACTATAACGGCATGGCGGATAACC  
AAGGTACAGAGGAGGAGGGGACTGGGTGTAATGGATGGTTTTTTGTGGAAGCAATTGTAG  
AACGTAACAGGGGATATTATTTAGATGATGAGCCTGAGGATGTGGAGGACAGTGGGC  
TTGATATGGTGGACTTTATTGATAATAGTGTGTACAGGTAGAGGGGCAGGAAAATCCAC  
AGGCATTGTTACATGCCAACAGCTGCAGGCAGATGTAGAGGCAGTGCAACAATTAAAAC  
GAAAGTATATAGGCAGTCCGTATGTAAGTCCTGTTGCAAACAGCGAACCCCTGTGTAGAAA  
AGGACCTAAGCCCCCGGCTAGGGGCTATATCCCTAGGACGGCGGTGAGCCAAAGCCAAAC  
GACGGCTGTTTGATAAGGCCCCAACCGCCGCCAAATGGCCATACTGACGTGGAAGCTGCGG  
TGGAGGTAAATACCGAGGGGACAGATGAAACAGAGACAGACCAGGTGCAGACAGTATCTG  
GGGAAACAACCTACAGATAGCCTAGGAAGGCAGCAAATTACAGAATTAATACATAACACAA  
ATATTCGTGTAGCATTTGTTTGGTATGTTTAAAGACCTATATGGATTAAGTTTTATGGACC  
TAGCACGGCCATTTAAAAGTGACAAAACAGTGTGTACCGATTGGGTTATTGCAGCATTTG  
GAATATATCATGGTATTACAGATGGATTTAAAACATTGCTAGAGCCACATTGTTTGTATG  
GCCATATCCAATGGCTAACATGTAGGTGGGGCATGGTATTATTATTATTAACAAGATTTA  
AATGTGGCAAAAACAGATTAACAGTAAGTAAATGTTTAGGAATGTTATTAAATATACCAG  
AAACCCAAATGTTAATAGATCCTCCAAAATTACGGACGCCTGCAGCAGCTTTGTATTGGT  
ATAGACAGGGGCTGTCCAATGCAAGTGAAATATTTGGTACACCCCCGGAATGGCTGGCCA  
GACAACTGTAATTGAATATAGCTTAGCAGACAGCCAGTTTGATTTATCTAAAATGGTAC  
AATGGGCATATGACCATAATTATATTGATGACAGTATTATTGCCCTGGAATATGCTAAAT  
TAGCTGATATAGATGAAAATGCGGCTGCCTTTCTAGGAAGTAATTGTCAAGCTAAGTATG  
TAAAGACTGTGGAACAATGTGTAGACATTATATAAGGGCACAAAAAATGCAAATGACAA  
TGTCACAATGGATTAAACATCGTTGTGATTTAGTAGAGGAGGAAGGTGAGTGGAAAGGAAA  
TAGTACGATTCCCTAGATATCAACATGTGGATTTTATATCTTTTATGATAGCATTAACAA  
AATTTTACAAAGGCATACCAAAACACAATTGTATATTACTGTATGGACCTCCAGACACAG  
GAAATCTAATTTTGGCATGAGTTTAATTAGCTTTTTTAGGAGGTGTAGTGCTATCATATG  
TTAATTCTAGTAGCCATTTTTGGTTAGAACCCTTGGCAGATGCCAAAATAGCTATGCTAG  
ACGATGCTACAACACAATGCTGGAACATATGGACATTTATATGCGCAATGCATTAGATG  
GCAATCCTATGTGCTTTGATAGAAAACATCGAGCTATGGTGCAAAACAAAATGTCTCCAC  
TAATAGTGACCTCCAACATAAATGCTAGTACAGACGACAGATGGCGCTACCTACACAGTA  
GAGTAAAATGTTTTTGTTTTCCCAATAGATTTCCATTTGATAGTAATGGAAACCCCTGTGT

ATGATTTAAGTAATAAAAAATTGGAAATCATTCCTTTAAAAGGTCATGGTCACGTTTAGCGC  
TGAACGACAACGATAACGAGGAGGAGGAGAATGGAGACCCTAGCAACACGTTTAGATGTG  
TGCCAGGAAAGGCTTCTAGACCTATATGAAAAAGATAGTAATAAACTAGAGGACCAAATA  
GAACATTGGAAATGCATACGCCTGGAGTGTGCATTGCAATACAAAGCCCCGGGAAATGGGA  
TACAAAGTGTTACAGCACCAGGCACTGCCTGCACCTGCTGTGTCAAAGGGCAAAGGGCAC  
AAGGCCATTGAACTGCAACTTGCATTAGAGACATTGCAAAAGACAGTATACAGCACCAGAA  
CCGTGGACATTACAGGACACATGCCTGGAACGGTGGAATGCACCACCAACTGGTTGCTTA  
AAAAGACGTGGACAAACAGTAGATGTTATATTTGATGGGCATCAGGATAACACAATGCAA  
TATGTAATGTGGGGAGATATTTATTATCAAAACTGTGATGGGGAGGGATGGACTAAGGTG  
TGCAGTAATATAGATGCAATGGGTATTTATTATATGGATGCAGAACACAAAGTGTATTAT  
GTGGATTTTAAAAAGGAAGCATCTAAGTATGGGGAATATGGACAGTGGGAGGTGCGTATG  
GGCAGCAGCATCATTTTTTCTCCTGCATCTGTATCTAGTACCGAAGAGGCATTGTCAATA  
TCCTCTACTGGCACTGCTGAACACACCAGACCAGCCAATTCCACACCACGTACCGACAAC  
TCCACAAAAGCAATCCCGTGCACGCCGCCCGCTAGAAAACGAGCTAGAGTCTACAGCACA  
GACCAGCAACCACACAGCACCTCAGACCCCGTGGGCTGTGACAACGACAGGCACATCAGT  
GACGATAACAACAAGAACCAAGGACGGCACACAAGTAGTGGTGACACTACACCTATAGTG  
CACTTTAAAGGTGAACCTAATACATTAATAATGTTTTAGGCAAAGAATACAAAAGTATAAA  
CATTTGTTTGAACAAGCATCCTCAACATGGCATTGGGCATGTGTACCAGGTACCACCTAAG  
AATAGGGGCATTGTAACATTAACCTATAGTAGTGTAGAACAAGGCAACAATTTTTAGTA  
ACTGTTTCGCATTCCACCTAGTATATCTATGTCATTAGGGGTAATGTCATTATAACAGATA  
ATCATGTTAAAGTTTTGTGATTGTACATACTATATTGTAATAACAGCCAATACTGCTG  
CTATGTGTATATAGTGAGGTATGTATGGTGAGTATGGTAGTGAGTGCATGCAGGCCTGCA  
GTGACTGAGGTGAGGTGTGTGTGTAGGTGTGTGTAGTGTATGCAGTAATAATGTTGTATA  
CAGTAAGTTGGTTAACATGTTGGTTTTTTATTATCCATGTTATTATGGCAATGTATTACAA  
CAGCATTTACTTTTTTTCTTGTAGCCTTTATTCTATTGTGGGTACCTGCCCTGTGTGTTT  
ATGTGCGCCTTGCCAGGCTTCTTGAACCTTGACCTTCACCTTTACATAAGGTGTTACTGTGC  
ACACCTACTGTGGATGCCCTGTGTAACCTGCTTACCATAGTATAATAAATATTGTGTAGA  
TATATTTGTGTATTATGGCTAAAGCAAGAGCCCCACGCCGAAACGTGCATCTGCAACAC  
AATTATATCAAACATGCAAGGCCTCTGGCACATGCCCTTCAGATGTAATTCCTAAGGTAG  
AGGGTACAACCTATAGCAGATCAAATCCTACGATGGGGCAGTATGGGCGTGTTTTTTGGGG  
GCTTGGGAATAGGTACTGGTAGTGGCACAGGGGGCCGCACAGGGTATATACCACTTGGAC  
GACCTCTACTACCCTTGAACCAGGTCCCTCCTGTACGTCCCGCAGGGGCTGTAGAAACAG  
TAGCACCTCTGACCCTTCCATTGTGTCTTTAGTAGAGGAATCTAGTGTGTGGATGTTG  
GGGCACCAACCCCTACCATTCCATCACAGGGTGGGTTTGAATAGCCACATCTAGTGATG  
CTACCCCTGCTATATTAGATGTCACCTCCACTACCACCCCTATTAGGGTGTCTATAACAT  
CCCATGATAATCCTATATATACAGAGCCATCATTATTAGACCCCCCCCCCTCCAGTACAAA  
TGGATGGTTCGTGTTTTAGTATCTACCTCTACTTTGCAATCGTCCACTGCTGAAAATATAC  
CTATGGACACTTTTATAATTATGCAGGACCATATAGGCACAACAACCTAGCACACCTATAC  
CAAGGCCGCCTGCACGCCCACGCTTAGGTTTATATTCCCGTGCGTTACAGCAAGTGCCTG  
TACAGGACCCTGCCTTTTTTACAACAGCCTTCCAGTCTTATAACATATGACAATCCTGTAT  
ATGAGGGTAACCCAGATGTTACCCTACACTTTGAGCAGCCCACAATACATAATGCACCTG  
ATCCCGCCTTTATGGACATATTTGCTTTACATAGACCAGCACTTACAACTCGTAGGGGGG  
TTGTACGTTATAGTAGGGTGGGCGACAGGGCCACATTACACACACGTAAGTGGCCTGCAAC  
TTAAACCTCGTGTGCATTTTTTTTTCAGGACTTAAGCCCTATTGCTCATGTCCCTGAGGAAA  
TAGAATTACACCTTTAATATCTGCAACAATAACAAGCATTAAACAATGGTCTTTACTCAG  
ATATATATGATGTATATGCTGACACAGATTTTGCTGACACTGGTGGTTTTCTCTCTCTA  
CTGTTTCACATAGTTCTGTACAAACAGCCCTACAACTACATCTATACCATCTCAGTATG  
GTAACACCACAGTTCCCTTAACCTGCCTCATCGCCATATACACCTATACCCACATCCTTTA  
GGCCCTCATCAGGTACACACCCCATTTGTTCCCGCACGTCCTATATTTCCACAAACACCCA  
TTGCTGTTAATGGTGGGGATTTTTTACCTGCATCCTAGTTATACTTATGTACGCAAACGCC  
GTAAACGTTTCCCATATTTTTCTTGAGATGGCTATGTGGCGGCCTAGCGAAAACAAAGTA  
TACCTGCCTCCTACCCAGTTTTCTAAGGTTGTCAGCACGGATGAATATGTGACTCGCACA  
AGCATATACTATCATGCAAGCAGCTCTAGATTATTGGCTGTTGGACATCCATATTTTTAAA  
GTACAAAAAAACCAATAATAAGCAAAGTATTCCTAAAGTATCAGGATATCAATATAGGGTG  
TTTAGGGTGCAACTACCTGATCCTAATAAGTTTGGACTGCCTGATCCTAGTTTATATAAT

CCTGAGACACAACGCTTAGTATGGGCATGCACAGGTGTGGAGGTTGGTAGGGGCCAGCCA  
TTGGGTCTTGCCCTAAGTGGTCATCCATTATTAAATAAATTGGATGATACTGAAAATGCA  
CCTAAATATGTTGGTGCAGGAGCTGACAATAGGGAAAATGTTAGCATGGACTATAAACAA  
ACACAGTTATGTATTTTGGGCTGCACACCACCTATAGGTGAACACTGGGCTAAAGGCAAC  
CTATGTACACCTAATACATTGGCTGCTGGTGA CTGTCTCCTTTGGAATTAGTAAATTCA  
TATATACAGGATGGTGATATGGTAGATATAGGATTTGGGGCTATGGATTTTAAAACCCTA  
CAAACCTCAAAAAGTGAGGTACCCCTTGATGTAGCTACCTCAATTTGTAAATATCCTGAT  
TACCTTAAAAATGGCTGCAGAGGCATATGGGGACAGTTTATTTTTTTTACTTAAGGCGGGAA  
CAAATGTTTTGTTAGGCATATGTTAAATAGGGCAGGTACCATGGGTGAGCCTGTACCTAAT  
GACTTATACATTAAGAAATCCTCAGGTAACCTTGACAGTTCTATTTATGCTGCAACTCCT  
AGTGGCTCTATGGTAACATCTGAATACCAAATATTTAATAAGCCATACTGGTTACAACGG  
GCCCAGGGTCAAAACAATGGTATTTGTTGGGGCAATCAGGTGTTTTTAACAGTTGTAGAT  
ACCACCCGTAGTACTAACCTAACATTGTGTGCTACAGCATCCACGCAGGATAGCTTTAAT  
AATTCTGACTTTAGGGAGTATATTAGACATGTGGAGGAATATGATTTACAGTTTATATTT  
CAGTTATGTACCATAACCCCTTACAGCAGATGTTATGGCCTATATTCATGGAATGAATCCC  
ACTATTCTAGAGGACTGGAACCTTTGGTATAACCCCCCAGCTACAAGTAGTTTGGAGGAC  
ACATATAGGTTGTACAGTCACAGGCCATTGCATGTCAAAGAATAATGCCCTGCAAAG  
GAAAAGGAGGATCCTTACAGTAAATTTAATTTTTGGACTGTTGACCTTAAGGAACGATTT  
TCATCTGACCTTGACCATTTCCTTTGGGTGCGCAAGTTTTTACTACAGGCTGGCCTACGT  
GCACGTCGCGCCTTCGGCCTGTAAAGCGTGCAGCCCTTCCTCCTCTAAGGGTACAGCG  
CGCAAGCGTGCTAAAACTAAAGGTAACAGTGTTGTATGTTGTGTTGTTATGTGTTGTTG  
TGTTTTGTACCTTGTCTGTGTGTATGTTGTGTATGTATTATGTTATGTGTGGAATGTTTGT  
GTGTCTTATTTATGTTGTGACTCGTATGTTATATATGTTGTATGTTTTCTGTATTATAT  
ATAATAAAGACTTTTGGTTGCACCCTATGAGTAACTTTTGTGTGATGTTGTTTGCTACGTG  
CTTAGTAGCCTTTACCTTTTACCTTTGGTGTCCATTTTGTATAATCTCCATTTTATATA  
ACCGAAACCGTTTTTCGGTTGCTGTTGGCACTAAAACTGTGTTTTAAGCACTTTGTATCGT  
ACATCTAATCTTTTGGGCGCCGCCACATCCTGCCCTGGTAGTTTTGCCAGCACATCTGCA  
CACCCACACATTTATACTGTGACAACAACCTTCACTTTCCATTGTGTAAAAACACGCCCT  
TTGCATTCCAACATTGATTTATATATTTTTTACATAATAAAACATGCTAGTAGGCACATA  
TTTTAGCTGTGTAACTTAGTAAGTGCATAGTTGGCAAATAAAACATAGGTGTATGCCA  
GGTACGTGTCTGTACAACAGTGACTAATTCAGGAAACCGATTTTCGGTTGCTCACCCATTA  
TCTTTTTTATCATTATTAT

>gi|9627377|ref|NC\_001593.1|\_HumanPapillomavirus\_type\_53,\_complete\_genome

GAAAGTAACAATCCTACTTTTATAGACAGGGAGTAACCGAAATAGGTTTAGGACCGAAAA  
CGGTACATATAAAAGCACTGTGTACAACACCCAGGACATCCATGGATCGTCAGTTATTTG  
AAAATACAGAAGAGCGACCACGTACATTGCACCAGCTATGTGAAGTTGTGAATAAACCAT  
TGCTGGAGCTGCAACTTGGCTGTGTGTTCTGCAAGAAGGCATTGACAGCGTCAGAGGTAT  
ATAATTTTGCATATACAGATCTAAGAGTAGTGTATAGAGACGGGTATCCGTATGGAGTGT  
GCAAAATCTGTTTGCTATTTTATAGTAAGGTCCGAAAATTAAGATATTACAATTGTTTCAG  
TGTAACGGGGCTAGCCTGGAAGCACTAACTAAAAAAAAGTTATCTGATTTATCAATAAGGT  
GCTACAGATGTCAACATCCGTTGACACCAGAGGAAAAACAGTTACACTGTGACTATAAGA  
AACGGTTTCACAAAATTTACATATGTGGACCGGGTCGTGCCTGACATGCTGGAGACACA  
CAACAGCAACTGAATCAGCAGTATAATCATGCACGGTAACGTACCAACACTTCCACAATA  
TATTATAGAATTATACCACAACTGAGATTGACCTGCAATGCCATGAGCAATTGAACAG  
CTCAGAGGATGAGGATGAGGATGAAGTAGACCATCTGCAGGAGCAGCCACAGCAAGCTAG  
ACGGGACGAACAACATCCTTGTTACCTAATTGAAACACAGTGTTGTAGGTGTGAGTCGTT  
GGTGCAGTTGGCTGTTTCAAGATTCAACAAAAGAGCTGCGTATTTTACAACAAATGCTTAT  
GGGCAGGTGGAGCTTGTGTGCCCTCTGCGCAACAAGGCGATAACTGCAATGGCGTCA  
CCTGAAGGTACAGATGATGAGGGGGATGCCGGGGATGGTTTTACGTGGAGGCAATAGTA  
AAAAAACGTACAGGGGATGTAATATCTGAAGATGAAACAGACGAGGAAAGCACCGAATCT  
GATTTGGATGGGTTTATAGACAATAGTAATATATCTACACAGGCAGAAAGGGAGACA  
GCTCAGCAGTTGTTACATGCCAAAACACACATGCAGATACACAGACGCTGCAGAAATTAA  
AACGAAAAGTATTTAGGCAGTCCATTAGGTGATATTAGTAATCAGCAAAACAGTGTGCCGGG  
AAGCTGTAAAACGAAGGCTAATTGATACAGAAGTGCCGGACAGCGGGTATGGCAATACTT  
TGGAACCGTGGAAGCAACGCAACAGGTACAGGAACAGTATGTAAGGGAGGCAAGTGCGCG

GAAAGAGCAAAATGGAGGCTCACAAACATAGTGTGTGTAGCAGAGATGGGAGCATAGGGTC  
AGGAAGTGATATGGATGTGGATAGACAGGATATAATGCCACTGCAACAAATACAAGATAT  
ATTAAATGTAGTAATGTGCAGGCCAAGCTATATTGTAAATTTAAAGATATATTTGGCAT  
ACCATTTTCAGAGTTGGTACGAACATTTAAAAGTGATAGTACATGTTGTCATGATTGGAT  
ATGTGCTATATTTGGAGTAAATGAACATTAGCAGAGGCATTAAAAACAATTATTTAAACA  
CAGTGCATATATTACCATATGCAATGTTTAAACATGTACATGGGGCGTGTTATATTATTG  
TTAATTAGATATACGTGTGGCAAAAACAGAAAAACAATTGTAAAGTCTTTAGCATCCATA  
TTAAATGTACCAACTGAACAAATGCTTGTGCGAGCCTCCAAAAATACGTAGCCCTGCGGTT  
GCATTATACTTTTATAAAACATCTATATCCAACATTAGTGACGTGTATGGGAGTACACCA  
GAATGGATAGAAAAGACAAACACAGTTACAACATAGCTTTGAGGACTGTCAATTTGAACTA  
TCTAAATGGTGCAGTGGGCATTTGACAATGAAGTAACCGATGATAGTCAAAATAGCATTT  
CATTATGCACAGTTAGCAGATGTAGACAGTAATGCACAAGCATTTTTTAAAAAGTAATATG  
CAAGCAAAATATGTAAAAGACTGTGGAATAATGTGTAGACACTATAAACGGGCACAACAA  
CAACAGATGAATATGAAACAATGGATAAAGCATGTATGTAGCAAGGTGGATGATGGTGGG  
GACTGGAAGCCAATAGTACAGTTCCTAAGGTATCAAGGGGTCGAGTTTATTTTCAATTTT  
AGTTATTTTAAATTATTTTACAAGGTACACCAAAACATAATTGTTTAGTTATTTATGGT  
CCTCCAAACACGGGTAAATCATGTTTTGCTATGAGTCTTATAAACTTTTTTCATGGGTCA  
GTCATTTTCATATGTAAATTCACACAGTCACTTTTGGTTACAACCGTTAGACAATACTAAA  
TTAGTTATGCTAGATGATGCCACAGAGGCATGTTGGAAATATATTGATGAATACCTAAGA  
AATTTATTAGTAGGGCAATCCTGTAAGCTTAGATAGAAAAACATAAGCAACTAGTACAAATA  
AAGTGTCACCTGTACTAATAACAACCTAATATAAAATCCAATGCAAGATGCAAAGCTACGG  
TATTTGCACAGTAGAATACATGTGTTACAGTTTTTAAATCCATTTCCAATTGATGTGAAT  
GGAAATCCTGTATACCAATTAATAATGCAAACTGGAAATGTTTTTTTGAAGGACATGG  
TCCAGATTAGATTTGGATAACGACGAAGACAAGGAAAACGATGGAGACGCTATGCCAACG  
TTTAGATGCGTGCCAGGAGAAAATTCTAGACTGTTTTGAAAGAGATAGCAAAAATATTAC  
AGACCATATAGACTACTGGAAGCTGTGCGACAAGAAAATGTAATATATTATAAGGCAAG  
AGAAAATAATATGACTAACTAGGCCACCAGGTGGTGCCCTGTTTACAAGTGTGTAAAGC  
AAAGGCATGCGTTGCTATAGAACTACAAATAGCATTGGAATCACTTTGTAAAACAGAATA  
TAATATGGAAGAGTGGACATTAAGGGATGTATGTGAAAGTATGTGGTATACAGAACCCAA  
ACAGTGTTTTTAAAAACAAGGACAACATATAGAAGTGTGGTTTTGATGGCAGCAAGGACAA  
TCGGGCTGAATATGTTGTGTGGAATGGGTATATTATTGTGGGGAGGATGGGTGGTGTAA  
AGTGTCTTCTGCAGTAAGCTATGAGGGCATATATTATATACATGACGGCCATAAAACGTA  
TTATACAACTTTAAAGACGAGGCCACCAAATATGGGTGTAAAGGCACATGGGAAGTGCA  
TATGGGAAAACAAAGTATTTATTGTCCCGACTCTGTGTCCAGTACCTTTAGATCCAACGT  
ATCCTCTGTTGAAACTGTTAACGAATACTACTCCCATAAGACCCCCACCACCTCCACGCC  
CGTGGGCACCTACGAAGCCTCATCATCCCTGCGGCCGGGAAAACGTCCCAGAACCACAGA  
GCCCCGACAGTACTGACTCCACCACACAGTCCACTACCACAGCCAGAGAGTCCTACGCAGA  
GTGTGTGCGCAAGGAACACAGACAACACAAAACAACACCAGAAAAACACCTCCCTGGTGG  
AGCTTCGTGTAACAACACCGAAATCGACAGTGGTTATAAGACTGCACCTGTAGTACATAT  
AAAAGGTGAAGCAAACAGACTAAAGTGTTTAAAGGTATCGGTTTTCAAAAACATAAACA  
GTTTGTACTGTATCATCCACCTATCATTGGACAAATGTAACTGTGCTGTAAATAATAG  
TTATATTACTGTTGTATATAAAGATGAAACCCACGCCAAAAATTTTTGGATATTGTAAA  
AATACCCCTAGTGTATCACTGGTACTGGGACATATGACATGTGTTGATATGTAATGTTA  
ATGTAATTGTTACATTATGTAATATTGTATTACAATAATACCTGGTATATACAATACTAC  
ACACGCCATATATGCTGCTAGGCCTGTAACTTGCAACCATTGTGTTGTGTGTTAGTTTT  
GTGTTTTTGCTTTGCTGCTTTGTGTGCCTGTTTGTCTGCTTTAATGTGCCGCTATTGCAG  
TCTGCCTCTGTGTTTGCCTCGTGTATATTACTTATACTTTTTATTTTGGTTTGTGTGGCA  
TCATCCTACATAACCACATTTTACACTATATATACTTTTTTTTTTACTTCCCTTTATTATGT  
TTCTATAGCCATGCTGTGTGGTTAATTAACACACAATAAATCACAGTTTTTTTGTATTGT  
ATGTATTGTGTGTTATATATAATAGTTTACCCACCGGGCACGCAGACGTAAGCGGGCATC  
AGCAACGCAGCTATATCAACATGTAAACAATCTGGCACATGTCCTGAGGATGTTATTAA  
CAAAATTGAACACAAAACCTGGGCTGATAAAAATATTGCAATGGGGTAGTTTATTTACATT  
TTTTGGAGGCCCTTGGTATTGGCACTGGCTCTGGCACTGGGGGGCGTACAGGATATATTCC  
TTTGGGTACTAGGCCTTCCACTGTTGTTGATGTAACCCCTGCTCGGCCCCCTATTGTTGT  
AGAATCGGTAGGCCCCACTGACCCTTCAATTGTTACATTGGTTGAAGAATCCAGTGTAT

TGAGTCTGGAGCTTCGTTCCCTAATTTTACAGGTAAGTGCAGGATTTGAAGTAACATCCTC  
CTCAACTACCACACCTGCAGTATTAGATATAACACCCACCTCTACCTCTGTACATGTTAG  
TTCTACTACATATACTAATCCCACATTTGTAGACCCTCCTGTTATTGAGGTCCCCCAAAC  
TGGTGAGGTATCTGGGAATATATTGATAAGTACCCCAACATCTGGGGTTCATAGTTATGA  
GGAAATACCTATGCAAACATTTGCTGTTTACAGGTACAGGCAATGAACCTATCAGTAGTAC  
TCCTATTCTCTGGTCTTAGGCGTATAGCTGCCCCACGTTTATATAAAAAAGCCTTTCAACA  
GGTTAAGGTCACAGATCCTGCATTTCTTCACAAACCTGAAACTTTAATTAATGTTGATAA  
TCCCATATTTTCAAAATGCTGACACAACGTTAACCTTTTACCATCAGGTGTGGCACCTGA  
TCCTGATTTTTTTAGACATTGTGGCTTTACACAGACCTGCCTTTACAACACGTAGAGGTGG  
TGTGCGTTTTTAGTAGGCTTGGCACAAAGGCCACTATGCGCACCAGAAAGTGGCAAACAAAT  
AGGTGCTCGTGTACATTATTATTATGATGTGAGTCCATTACACAGACTGAAGAAATTGA  
AATGCAGCCATTATTGTCTACAGATAATACATTTGATGGCCTATATGATATTTATGCAA  
CATAGATGATGAGGCACCTGTGTCTCTCGTTTTTCTATTGCTACACCTTCTAGGTTGCC  
TACCAACACTGTTCTTTGTCTTTTAGTGGTAGTACCTCTAATGTTACAATACCCTTTGG  
TACATCTTGGGATGTTCCCATCTATTACAGGTCCCGATGTAGTGTGGCCACAGGACCCCC  
TACATGGCCTTATGCACCTCAATCTCCTTTTGATAACCACCATGATGTAGTTATACAGGG  
CTCCACATTTGCGTTATGGCCTGTTTATTTTTTGAAACGTAGGCGTCGTAAACGTATTCC  
CTATTTTCTTGCAGATGGCGGTGTGGCGGCCTAGTGACAGCAAGGTTTATCTGCCTCCTA  
CCCCCTGATCAAAAGGTCATTACAACGGATGCCTATGTAAAACGCACCACTATATTTTATC  
ATGCTGGAAGCTCTCGCTTACCGTGGGACATCCTTATTACCCCATTTCTAAATCTG  
GTAAAGCAGACATCCCTAAGGTGTCTGCATTTTCAGTATAGGTGTTTAGAGTACGCCTCC  
CAGATCCTAATAAGTTTGGCCTTCTGATACAAATATATTTAATCCTGACCAGGAGCGGC  
TTGTATGGGCTGTGTAGGGCTAGAGATTGGCCGTGGACAGCCTTTAGGTGTTGGTGTAA  
GTGGCCATCCACTGTTCAATAGGTTGGATGACACTGAAAGCTCTAGTATAGCTATTCAGG  
ATACTGCCCCGGACAGTAGGGATAATGTTTCAGTGGATCCTAAACAAACACAGTTATGCA  
TTATTGGCTGTGCACCCGCTATAGGTGAACACTGGACAAAGGTACGGCCTGTCTGTTCCA  
CACCTACTACAGCGGGCGACTGCCCCCATTTGGAACCTTATCAATTCACCTATTGAGGATG  
GAGACATGGTGGACACAGTTTTTGGTGCATTAACTTTAAAGCTTTGCAGGAATCTAAAT  
CTGATGTGCCATTGGATATTGTACAATCCACATGTAAATATCCCGATTATTTGAAAATGA  
GTGCAGATGCCTATGGGGATTCTATGTGGTTTTATTTACGTAGGGAACAGTTGTTTACCA  
GACATTTTTTTAATAGGGCAGGCGTTATTGGTGAGGAAATACCTAATGACTTATATATTA  
AGGGTAGTAATGGCAGGGACCCGCCCCCTAGCTCTGTATATGTTGCTACACCTAGTGGGT  
CTATGATAACTTCAGAGGCTCAATTGTTTAAATAAGCCATATTGGCTGCAACGTGCCCAGG  
GACATAATAATGGCATCTGTTGGAACAATCAGTTATTTGTAAGTGTGTGGATACCACCA  
GGAATACAAACATGACTCTTTCCGCAACCACACAGTCTATGTCTACATATAATTCAAAGC  
AAATTAAACAGTATGTTAGACATGCAGAGGAATATGAATTACAATTTGTGTTTCAACTAT  
GTAAAATATCCCTGTCTGCTGAGGTTATGGCCTATTTACATACTATGAATTCTACCTTAC  
TGGAAGACTGGAATATAGGTTTTGTGCGCTCCTGTTGCCACTAGCTTAGAGGACAAATACA  
GATATGTGAAAAGTGCAGCTATAACCTGTCAAAGGATCAGCCCCCTCCTGAAAAGCAGG  
ACCCACTATCTAAATATAAATTTTTGGGAGGTCATTTGCAAAACAGTTTTTCTGCTGATT  
TGGATCAGTTTCCCTCTTGGCAGGAAGTTTTTAATGCAGGTTGGGGTCCGTAATAACCGC  
CTGTATCCTCTAAAAACGCTCTGCTTCTACTACATCTACCTCAGCCCCCTCCTCCAAGC  
GCAAACGCAAATAGTATGTTGTGTGTCTGTATTGTGTATGTATGGTTGTATTATGTACTA  
TTTATTTATTTGTGTATACTGTATGTGTGATTTGTTGTCTGTGTTGTATGACTGTATGTA  
TGTGTAATGTTTGCATGTTGTTAATAAATATGAATGAGTGTTACTTTTACGCGTGGTTGC  
ATAAACTAAGGCGCGGTGGTGTCCCTAGGCAGTTGGGTGGCATGTTAGGTGGCGTCCCTG  
TTTATATACCAATCTCCACCCTGTATTATTAATATATGTACTGTTATCATGCAGTTACCT  
ATACCACATATAGTATAGCTTATAGGTATCCATTTTATAGTTTGGCGCCTTTTGGTACCCT  
CCATTTTGCCTTGCAACCGGTTTTCGGTTGTGTCATATCTTGTAATACCACAAGCATATTC  
AGCAGAACTGTTAATCCTTTGGCATAGTGCCGTTTCCCTGTGTTTAAATGTTTTTTGTTTT  
ATACACATAGCCTTACCTATTAGTCACTTACTGTAGGCTGCCAACTATGCTTTTACCTGC  
ATACCTTAGTGCTTTTGGGCACACATTTTTATTTGCAAACATCTGCACTTTAGTGTTTTGG  
CTTGACAGCATACGTTCTGCTAGCCAAGTATCTGTCTAGTAAACCAGGTGTGCACCTATTA  
CTCATGCACCGCAACCGTTTTACGGTTTTGACAGCAACAGGCCTTTTTTTATAATTATT

>gi|9627305|ref|NC\_001583.1|\_Human\_papillomavirus\_type\_26,\_complete\_genome

TAACAATTATATGTTACTAAAAGGGTGTAACCGAAAACGGTTGCAACCGAAAACCGGTACA  
TATAAAAGTAAAAGGCTAGCTACGTGCAAAACAGCTATGTTTCGAGGATCCTAGAGAACGA  
CCCAGAACGCTACATGAGCTATGTGAAAGCTTGAATACTACTTTGCAAAATTTGCAGGTA  
CAGTGTGTATATTGCAAGGAAACCTTACAATGGGCTGATGTATATAATTTTGCAATTTGT  
GACCTAAGAGTAGTATATAGAGATAGGAGTCCGTATGCTGCATGCAAAAGATGTGTAATA  
TTTTATTCAAAAATAACAGAGTATAGACGCTATACATGTTCTGTGTATGGTGCAACATTA  
GAAGCCTTAACTAAAAAAGTTTATGTAATTTGTTAATAAGGTGTCATAGATGTCAAATG  
CCATTGGGGCCAGAAGAAAAACAAAGAATTGTGGATGAAAAGCGACGATTTTCACGAAATA  
GCAGGGCAGTGGAAGGGTGTGTACAAAATTGTTGGAGACCAAGGCGCCAAACAGAAACA  
CAAGTGTAAGAACAATGCATGGAAAACATAATTAATATTGAAGATGTAATACTAGATCTG  
GTGCCGCAACCCGAAATTGACCTACGCTGCTACGAACAATTGGACTATGAACAATTTGAC  
AGCTCAGATGAGGATGAAACAGATAATATGCGTGACCAGCAGGCCAGACAAGCTGGACAA  
GAAGTGTGTTACAGAATTGAAGCACAATGTTGTATGTGTAATAGTATAGTGCAGCTAGCT  
GTGCAGAGCAGTCGACAGAACGTTTCGAGTGCTGGAGCAGATGTTAATGGAAGACGTGTCC  
TTGGTGTGCCATCAGTGTGCTGCACAGTAAACCTGCAATGGACTGTGAAGGTACAAATGA  
GGAGGGGCGGGGTGTACAGGGTGGTTTTTCAGTAGAAGCTATAGTGGAACAAACATACAGG  
GGACACAATATCAGATGATGAAACAGACAATAGTAGTGATACAGGGTCGGACCTAATAGG  
ATTTATAGATGATAGTAGTATAAGTGATTATGCAGAACAGGAGGTAACCCAGGCATTGTT  
TCAGGCACAACAAAAACAGGCAAAATACAAAGGCAGTGCAGCAATTTAAACGAAAGTTACT  
AGGTAGTCAGAACAGCCCGTTGCAAGACATAACAAATCAACACAGACAGCAAAGCGACAG  
TCAGCAGAATACACACCAAGTAAATAATTCACAGGCCAAAAGGAGAGCCGTGGACAGTGT  
ACCGGACAGCGGGTATGGCTATACTGAAGTGGAACCTCTTACGCCCGTACAGGTAGATAA  
ACAATATGAAGAAAATGGCGGGTTGCCTAGTGTGTGTAGTCAGGGGGGTCAAATGCCTC  
AGTGGAAGATATCGATGTAGACACACATGTAAACAGTGTTACACAAATATGTGAATTATT  
AAAATGTAGTAATGTAAAAGCAGCATTGTTAAGTAAATTTAAACAGTATATGGTGTAAAG  
TTTTGCGAACTAGTACGGGTGTTTTAAAGTGACAAAACATGCTGTTTCAGATTGGGTGTG  
TGCAGCATTTCGGTGTGGCAGGCTCTGTAGCAGAAAGTATTAAATCATTAAATACAACAATA  
TTGTTTATATTATCATATACAATGTTTAAACATGTAATTGGGGAGTAATAGTACTAATGCT  
AGTGCGCTTTACATGTGCAAAAAACAGAACACAATTAAAAACTGCCTATGTATGTTATT  
AAATGTGCCAGAAACGCAATTACTAATTGAACCACCAAATTTGCGAAGTACAGCAGTAGC  
ATTATATTTTTATAAAACAGGGTTGTCCAATATAAGTGAGACATATGGAGATACACCAGA  
ATGGATAGTACGACAAACACAATTAGAACATAGTTTTTGATGATGCTACATTTGATTTATC  
AAAAATGGTGCAATGGGCGTTTCGATCATGACATAACAGATGATAGTGAAATTGCATTTAA  
ATATGCACAGTTAGCTGACATAGATAGTAATGCAGCTGCCTTTTTTAAAGCAATTGTCA  
GGCAAAATATGTAAAAGACTGTGCAACCATGACTAGACATTATAAAAGAGCACAGAAACG  
ATCTATGTGTATGTCACAATGGCTACAATATAGATGTTCTAAAATAGAAGAGGGCGGGTC  
GTGGAAGGAAATTGCCAAATTTTTTAAGGTTTCAACATGTAACTTTATTTATTTTTTACA  
AGTGTTAAAAACAGTTTTTAAAGGGTACCCCAAAGCACAAATTGTATAGTAATATATGGACC  
GCCAAATACTGGTAAGTCACAGTTTGCAATGAGTTTTTATAAAATTTATGCAAGGGTCAGT  
CATTTTCATATGTAAATTCAAATAGCCATTTTTTGGCTGCAGCCTTTAGAAAGATGCAAAAGT  
TGCAGTATTAGATGATGCTACATATAGCTGCTGGTTATATATTGATAAAATTTTACGTAA  
CTTTTTTAGATGGAAATCCCTGTTGTATAGACAGAAAACATAGAAGCCTACTGCAAGTTAC  
ATGCCCCCATTAATAATTACCTCAAATATAAATCCTCAAGAAGATAACTCACTTTTGT  
TTTACATAGTAGAGTAACAGTGATACCATTTCCAAATACATTTCCATTTGACAGCAATGG  
GAATCCTGTATATGCATTGACTGATGTAAATTGGAAAAGCTTTTTTTCCACCACCTGGTC  
CAGATTAGATTTGGAGGAGGACGCGGACAAAGAAAATGGAGAACCTTTGCCAGCGTTTAA  
ATGCGTGCCAGGAGAAAATACTAGACTATTATGAACTGGACAGTAATAAATTAAC TGATC  
AAATTGATTATTGGAAACTGGTACGATATGAATGTGCAATATTTTATAAAGCTCGTGAAG  
GAAACATGCAATGTATAAACCACCAGGTGGTGCCCTCTACTGTTGTGTGTAAACAAAAGG  
CATGGCAGGCAATTGAAATACATATAGCATGTCAGTCGTTAATAAACACGGACTATAATA  
CAGAAGCTTTGGACAATGCGAGACACAAGCTATGAAATGTATATGACAGAACCCTAAACATT  
GTTTTTAAAAAAGAAGGAACAACGGTAAACAGTGGTATTTGATTGTAATAAGGAAAATACAA  
TGGATTATATTAGGTGGAATATGTGTATTATAAACTGATATAGGGTGGTGTAAAGGTA  
CTGGAGATGTTGATGCAAAAGGGATATATTATACACAAGGGGCATATAAGCAGTATTACG  
TGGACTTTAAACAAGAGGCGGAAAAATATGGGACAGGTGTGCAATGGGCTGTACATGTGT

GTGGTCAGGTAATCTGTTGTCCTGAATTTGTATCTAGTACCTGCAGCAGCAACCAAATAT  
CCTACTGCTAAAACCTGCTGAGCCAGTATCAAACGCCACCACCCAGACCACCGAAGCCTACG  
TGCCCGTGGGCACCAGGAAACCGAGGCGCCATACCCAGGAAAGCGACGACGACTCAGTG  
GACCTGACACCACCGTCACCACAGTCACCACTGTCACCACAGCTGCCACACAGCCCGGAC  
AGTCAGTGGACTATACAAACAACAACCTACACAGTACAAGTGGAGGCCATCACCCGGGAA  
GGGACACGAGTAGTGACCAAACCTGTGTTTATAGTACACCTAAAAGGTGATACAAATAGTT  
TAAAATGTTTAAGATATAGATTTAAAAAGCATAAAGGATTGTATTGCAATGTATCATCTA  
CCTGGCATTGGACCAGTAATGATACCAATCAACAAGGCATTGTAACAATTACCTTTAACA  
GTATAACACAACGTAATAATTTTTTAACAACCTGTTAAAATACCACAAAAGTATAACTTCAA  
CATTGGGAATAATGTCATTGTAATATAGTGTATATTTTACCAACACACAAGCCAATATGT  
GCTGCTAACACACCTATATACCTGTAATCATTATTCCTTTTATAGTTTATGTGTTTGTGC  
TTTGCGTGTGTGTGTGTGTGTTGCTGTGTTGTTTGTGTTGCCACTTTTGCTTTCCATTTATG  
TGTTTGCAGCCTCGCTATTATTAGTGTGTTTGTGTTTGGTTTGTGGTATCTACATCATATA  
TAACTACCTATATTGTGTATATTTGCTTATTTTTTATACCTGCTTGTTTTTACATTTTT  
ATACTGTAATGGTAATTGCTACTTAGTCCCTTTAATAAACGTGTTACAATGGTAGCTGTC  
CGTGCCCCCTCGACGCAAACGAGCATCAGCTACAGACTTATACAAAACATGTAAGGCCGCT  
GGTACGTGCCCTCCTGATGTTATTCCATAAAATTGAAGGTTCTACCCCTGCTGATAAGATA  
TTACAATGGAGTGGTTTGGGAATATTTTTAGGTGGTCTTGGTATAGGTACAGGAACCTGGG  
TCTGTGGGCGTACTGGATACATTCCCTAGGAGGGGGTGGTAGACCCCTCTGTTGTGGAT  
ATCGGCCCTACCCGTCGCGCCATTATTATTGAACCTGTGGGTCTTACAGAACCCTTCTATA  
GTTACTTTTGTGGAGGAATCTAGTATTATACAATCTGGAGCCCCCTATACCTACATTTAGT  
GGTGGCAATGGCTTTGAACCTTACCACATCCTCTGCAACAACACCTGCTGTGTTGGACATC  
ACCCCTCTGCTGGTACTGTACATGTAACAAGTACCAATATACAAAATCCATTATATATT  
GAACCCCTATAGATATACCACAGGCCGGGGAAGCATCAGGTCATATATTTACTACAACG  
TCCACAGCTGGCACACATAGTTATGAAGAAATTCCAATGGAAGTATTTGCTTCTACTAAT  
GGAACAGGATTAGAACCTATTAGTAGTACACCTATTCCTGGTATACAACGAGTGTACGCT  
CCTCGTTTGTATAGTAAGGCCTATCAACAGGTAAAGGTTACAGATCCCAATTTTATTGGT  
AATCCCTCCACATTTGTTACCTTTGATAATCCTGCATATGAACCTATAGATGAAACACTT  
ACATATGCTTCCAGTAGTACTGTAGCACCTGACCCGATTTTTTTGGACATTATTGCATTG  
CATCGTCCGGCCCTTACATCTCGCAAAGGTACTGTACGCTATAGTAGGTGGGTCAAAG  
GCCACTATGAAAACACGTAGTGAAAAACAAATTGGAGCTACAGTACATTATTATCATGAT  
ATTAGTCCTATACAGTCTTTTGCTGAACACGAAGAAATTGAATTGCAGCCTTTACATACA  
TCTACCCATTATCATCTGCACCTTTGTTTGATATATATGCAGACCCTGATACAGTTCCTAGC  
ATACATACGCCGCGCATGTCATATTCCCTTACAACATTACCAGTTCCAAGATATGCCTCC  
AATGTGTTTTCTCTATTATAACTTCCACTACCAATGTTACTGTGCCTTTATCCACCTCA  
TTTGAACCTACCTGTATATAGTGGGTGAGACATTTACACGCCACATCTTCCCCGACATGG  
CCATCATTGCCCCCCCCACCCACCACTAACCTTACCTGCAATAGTTGTGCATGGGGATAAT  
TATTATTTATGGCCCTATATTTATTTAATCCATAAACGCCGTAAACGTATGCCTTATTTT  
TTTTCAGATGGCTTTGTGGCGTACTAGTGACAGCAAGGTATATCTTCTCCACCCCTGT  
GTCTCGGGTTGTCAACACGGATGAATATGTAACCTCGCACCGGCATATATTATTATGCGGG  
CAGCTCTCGTTTATTAACATTAGGACATCCATATTTTTTCCATACCTAAAACCTGGCCAAA  
GGCCGAAATTCCTAAGGTATCTGCCTATCAGTACAGGGTATTTAGAGTGCACCTACCTGA  
TCCTAATAAAATTTGGATTGCCTGATCCACAGTTATATAATCCTGACACAGAACGCCTGGT  
GTGGGCCTGTGTTGGTGTGTAAGTTGGTAGAGGACAGCCATTAGGCATTGGCCTTAGTGG  
ACATCCTTTGTTTAATAAGTTGGATGATACCGAAAACCTCTCATTGCTACTGTAAATGC  
AGACACTGACAACAGGGACAATGTTTCAGTTGATAATAAACAACACAGTTATGTATTAT  
AGGTTGTACACCGCCCTTGGGAGAGCACTGGGGTATTGGCACTATATGTAAAAATACACA  
GACACAACGTGGGGATTGCCCCCCTTAGAATTAATTTCCAGCATTATTGAGGATGGCGA  
TATGATTGATACAGGCTTTGGAGCTATGGATTTTACTGCCTTACAGGCTACCAAATCAGA  
TGTGCCCATTGATATTAGTCAATCCACATGTAATATCCTGATTATCTTAAATGTCTGC  
AGATACATATGGAAACAGCATGTTTTTTTTTCTTCGCCGGGAACAATTATTTGCCAGACA  
TTTTTATAATAAGGCGGGGGCTGTTGGGGATGCTATACCCACCACTTTGTATATTAAAGG  
TGCTGAATCAGGCAGGGAGCCCCCTACATCTTCTATTTATTCTGCTACACCTAGTGGCTC  
TATGGTTACTTCGGATGCACAACCTATTTAATAAGCCATACTGGTTACAACGTGCACAGGG  
TCATAATAATGGTATCTGTTGGGGCAATCAATTGTTTGTACCTGTGTTGATACCACCCG



CAGTACTAACCTTACCATTAGTACATTATCTGCAGCATCTGCATCCACTCCATTTAAACC  
ATCTGATTATAAACAATTTATAAGACATGGCGAAGAATATGAATTACAATTTATATTTCA  
GTTGTGTAAAATAACACTTACAACAGATGTTATGGCTTACATACATTTAATGAATGCCTC  
CATATTGGAGGATTGGAATTTTGGACTAACCTTACCTCCCCTGCTAGTTTGGAAAGATGC  
CTATAGGTTTATTAAAACTCTGCTACTACCTGTCAGCGTAACGCCCCCTCCTGTGCCAAA  
GGAAGATCCTTTTCAAAAATTTAAATTTTGGGATGTAGATTTAAAAGAAAAATTTTCTAT  
TGATTTGGATCAATTTCCACTAGGGCGTAAGTTTATGTTACAGGCCGGCATACAACGGCG  
GCCGAAACTAGGCACCAAACGTCCCTTATCTTCTACCTCTTCTCTACCAAACGCAAAAA  
ACGTAAACTTACTAAATAATTCGCATGTTTGTGTGTGTGTATATGTTTGTGGTATGTTA  
TGTAAGGTGTGTTTGTATGTGTGTACAACCTGTATGTAATGTAAAGGCGTGTTTGTATGT  
ATGTATTATATGTATGCATGGTTATGTGTTTCTGTTTGTATGCATACTTGTTATTTAA  
TAAAGTATGAATGTGTCTTCATGCATGGTTACATGTCTTTACTACACTATTTGTCATTTG  
TTTTACCCCTGAGGTAATGGGAGGAACCTTAGGTGGTGTCCCTTATAATTATTATATTAC  
ACAAGTTTACCTTTTATATGTATTTCACTAACTTTTGTAGTGTTATATTTTACTTTTT  
ATATTTTCTATTACTATCTATTGTCCCAACCGTTTTCGGTCGTTCCCTATTTTAGTTTT  
ATCCAACCTTCATGCTGTATCCTGCAGGAACAGTTAATCCTTTGGCAGACAACACATCCT  
GCCTCCTACGCTTGGCTTGCCATTTTGGCACTATAAGTGGCGCGCCTGTATTAGTCACAT  
ATATTTAAACAATACTTACATAAGCACTTTTCTTACATTATAATAAACTGCTGTTAGG  
CACATATTTTATTTTATTTTATAGGTCCTTTAAGTGCATAGTTGGCTAACATATACACT  
TTTGTTTTGCCAACATGTGTCTGACACATAGTTGTAACCCATAGTTAAACACAGGTGT  
GTATGTAACCGAAATGTGTTTTGTTAATGCATGCAAGTTTCTTTATAATAACTTT  
>gi|167600365|ref|NC\_010329.1|\_Human\_papillomavirus\_type\_88,\_complete\_genome  
ATAGTTGGCAACAATCACCTCTGCAGAAAAATATATAACCGGCAGTGTTACTGCAGATTAT  
TATTTTTTTGCCGAAGTATGCAGATGGAGGATTCTTATCTACCAAAACGGCTAGATGACTT  
CTGTTTCGATTTTTAATATTTCTCTTTTTGATGTGCATCTTCCTTGCAATTTTGTGGCTA  
TATTTTGGACCTACAGCAGTTGGGTTCGTTCTATCAGAAACAGCTTAGTTTGGTCTGGAG  
GAGCGGTGCTTGTTTTGCCTGTTGTGTCCCTTGTCTAGGCTTTCTGCTAGGTATGAGGC  
TGAACGCTTTTACCGCTGCTCTGTAAAGGGAATTCATTTTGGAGATTTCCTAAGAAAGAA  
TCTAGCTGATGTGGTATGCCGATGCTATGAATGTATGTCATTGCTTGATTACCTGAAAA  
ATTAGATTGTATCTTTAGGGGTGAGTGTTCATCTTGTGAGAAACACTGGAGGGGAAC  
GTGCAGAAATGTTGTAGAAAATGATTGGGAAGGAGCCCTCAATTAATGATCTAGAAATA  
AAGCTGGAAGAACATGTATTGCCTGCTAACCTTTTAAGCAACGAGGTTTGTCTATCTGAT  
GAGGAGACCCAGGAGGAGGAGGAGCGAGAACCCTTTCCAATAGATAACAGTTGCGCCTTC  
TGTGAAGCAGGTGTAAGGGTATTTGTTCTAGCTTCACCAGCCGGAATTCGCACGCTTCAG  
CAGCTTTTACTTGCAGAGATTTCCATAAGTTGCCCTGGGTGTTCCAGGAACAACTTTCGA  
CATGGCAGACCCCAATAAAGGTACTGATACTACTGATAATTTTGAAGTGAATTTCTGAATG  
GTTACTTGTAGATGAAGCAGAATGTGTAGACGATTTAGATGTACTTGATGAATTTGTTAGA  
AGAAAGTACGCAATGTTCAACGGTTTTCAAACTTGATTGATGATGACCCAGTTGATATTGA  
GGATCAGGGAAATTCCTTGGCCTTATTCAACAGTCAGGTAACAGAGGATTGTAACACAGC  
TATAAGCGCCCTAAAACGAAAGTTAATCAAAAGTCCGCAGCTGCAGACTGTTGCTGAGTT  
GAGTCCAAGGCTTCAAGCAGTTTCAATTTACCCAAAAAACAAAGCAAAAGACGCTTATT  
CGATGACAGTGGCATAGGAGAAGATGAAGCTCAAAATACTTCTCAGGTAGCGTTGGACTC  
CTTAGAAAAGCTCCTTAGAGACATCGGGAGCTGGGCTAACTATTAACCTTTTACATTGCAG  
CAACCGACAGGCAACCGTCCATCTAAAATTTAAAGAACTCTATGGTGTATCATTTAAAGA  
ACTAACTAGAAAATTTTAAAGTGATAAGTCTTGTTCCAATAGCTGGGTAATTGCTGTGTA  
TAATGCTGTAGAAGAAGTTCTGGAGGCATCAAAGGTGCAGCTTCAGAAGCATGTAGAGTT  
CTTACAGTTAATAGTGTATGGATTTTCATGGGTTGTATCTAATTGTATTTAAAGCACTAA  
AAATGAGATACCTGTATCTAAATTTGTTTACGGAAATGTTAAATGTTAATGCTTTACAATT  
AATGTGTGATCCACCAAGGACAAGAGTGTTCGGTAGCGTTATTTTTTTATAGAAAAAG  
TTTGGGAATGCTTCTTTTATGTATGGAGAAGTTCCAGATTGGATTAAAAAACAAACCTT  
GGTAGAGCATCAGTCTGCGTCAGCAGCAGACATTTGATTTTAGCTCTATGGTTCAATG  
GGCATATGATAATGAATTCACAGAAGAAAGCAGAAATTGCCTATCAATATGCTTTGGCAGC  
AGATGAAGATCCAAATGCCGAGGCATTTTAAAACATAATAATCAGTATAAATTTGTAAA  
AGATTGTGCCGCAATGGTAAAAATGTATAGAAGGTATGAATTGAGACAAATGTCAATGGC  
TGAATGGATAGATAAATGTTGTTCAAAATGTACCGAAAATGGTAACCTGGAAAATAATTGC

TACATTTCTGAAACATCAGAATGTACAATTTTTATCATTTCTCATTGCATTGAAACCTTT  
CTTACAGGGTGTTCCAAAGAAGAATTGTCTGGTGTGTTGGGCCCCCTGACACTGGGAA  
ATCATATTTCTGCTTCTCATTAATACGTTTTTTTTGGGGGAAAAGTTGTGTCCTTTATGAA  
TAGAAATAGTCATTTCTGGTTACAACCATTGCAAGATACTAAATTAGGCTTCCTAGATGA  
TGCAACACATCCATGTTGGGTGTATATGGATATTAACCTTCGGAATGGACTAGATGGTAA  
TCTTGTATCTCTTGATGCAAAGCATAGAGCTCCAATGCAAATGAAATTACCTCCTTTACT  
TGTTACCACTAACGTGGATGTAATGGAGGATCAATCCTTAAGATATCTGCATAGTAGACT  
AGTATGTTTTAAATTCCCTAACAAATTACCACTGAATGACGATGGCTCCCTTGTATATGA  
AATAACGAATGATACATGGGCCTGTTTTTTTTAGAAAATTTGCTACCCAGTTAAACCTGGT  
CTTAGAAGATGGCGAGAATGGAAACACAGGAACTCTGACAGAACGTTTCGTTGCACTGC  
AAGATGCCATATTGAATCTAATTGAAAGGGGAGAACTGATTTAAGATCCCAAATACAAT  
ATTGGGAGCTGGTTAGAAAAGAGCAGGTGATCCTTTATTATGCTAGAAAAGTGGCTATA  
ATAGACTTGGCCTGCAGCCTACTCCAGCACCAGCGGTTTCAGAATACAATGCTAAACAAG  
CTATCCATCTCCAGCTTATGTTAAATCCCTTGAAAAATCAAAATTTGCAAAAGAGCCAT  
GGTCATTAACCTGATGCAAGTGCAGAGCTTGTAATACTCCTCCTAGGGACTGCTTCAAAA  
AAGGAGGATTTACAGTAACTGTGTACTTTGATAATGATCGAGAAAACAGCTTTCCTTACA  
CACAATGGGAACATATTTATTATCAGGACCAGAACGAGCAGTGGCATAAAGTGCCAGGTG  
GTGTTGATCACAATGGGCTGTACTATGATGAGGAAAATACCAATGAAAGGTATATTTCC  
TTTTATTGTAGCCTGAGTCTCAAAAATATGGCAGTAGTGGACAATGGACTGTGCATTATA  
AAAATACTACTGTTTTCTGCCTCTGCCACCAGCTCTTCTAGGCGGTCTCTACCCATCTCCA  
CCAAAACCGATTTTCGACGCCACAACCGCCGGCAACACCACGACCTCTGCCCCGCAGAGAA  
GTCCAAGGAAGCGACTACAAGAGGCGGTGAGCTCAACCACCTCCCCGCCGCCACAATC  
TTCGATCTCCAGGAAGAGGACGAGGAGAAGGAGAACGAACCTCCGGAGCAAAGAGAAGAA  
GAACAGCCACCGACGGAAACACTCTCGGAGAATCTGTCCCGTCTCCTTCGCAGGTGGGAT  
CAAGACATAGAGCACCTGAAAGATCTGGTCTCTCGCGACTTGGACGACTTCAAGCGGACG  
CTTGGGATCCCCCATTGATCATTATTAAGGTCTTGCAAATACCTTAAATGCTGGAGAA  
ATAGAATGAAAAAAAATAGTTCCTCCAATTTAGTTTGCAGCTCAGTCTGGAGATGGATAG  
ATAGTACCACCCATGAAAACAGCCGCATGCTTGTAGCATTTCAAAATACTGCTGAAAGAA  
CTCGATTTCTAAATTCAGTGACTTTGCCAAAGGGTACAACCTACGCATTTGGTTACCTTG  
ATTCATTGTAACCTATGTATAAAACCAGAAGTAAACGTGACACTGCTGAGAAATTTGTATAG  
ACACTGTAAAGCTACTGGCAACTGTCTCCAGATGTAGAAAATAAAATAGAAGGCAATAC  
ATTAGCAGATCGATTGCTGCGCATTTTTTGGTAGTGTATATACCTGGGGGGTCTGGGTCT  
TGGTACAGGGGAGGGCACAACAGGTATTAGACCTATAGAAGCTCCTGTTGAAACAGTTTCG  
CCCAGATATAACCGTAGAGAGACCCACAGTAAGACCAAGACCACAAAGACCTACCACCTT  
CGGTACACCTATAGATAGAATTGGATCTGCTGATATCACTCCTAATGTAGTTAAGCCAC  
AGAATCCTCTATCGTGCCCTAAATGAAAGTGGGATTCCAGACCCTACAATTATAGATTCT  
TGCAACAGGGGGTGGTGAGGGTCTAGGAGAATATGACATATTGACCACTGTAGATCCAAA  
TGAGACCTCTCGGAGCTACAGGGGGGCATCCTACCACCTTCTGGTACACTTAATAATGAAAC  
AGCAATCTTAGACATCAGTCCCTATGAACCTCCTCCAAAACGTTTTGCACTTGCCCCAAG  
TGTGCATGCAGAAGCAGACATTACTATTATAGAGAGCTCACTACCTACAGAATCAAACAT  
AAATGTGTTTGTAGATGCTAATATTACAGGTGAAATTGTTGGTGAAGAAATCCCATTAGA  
GCCTATAAATTCATAGAGAATTCGAAATAGAGGCTGGGCGCCAGACTAGTACTCCTAG  
GGAAGCTGTTGAAAGATTTCTTGGGCGGGCCAGAAGCTTATATAATCGTTACATTCAACA  
AATCAGAACAGACAATGTTGACTTTTTTAACCCGGCCTTCACGCGCGGTCAATTTGAATT  
TGAAAATCCCGCCTTTACTGGTGATGTAAGTCTTGAATTTGCGCGGGATGTTGCTGAAAT  
AACAGCGGCTCCTGATCCAGATTTTGCAGATATAATTAGGTTGGGCCGTCCCATATTTTC  
TGAAACACCAGGTGGAACAGTGCAGTGCAGATTTGGGAACAAAAGGAGCGATTAGTAC  
CAGAAGCGGTACCATAATAGGTCTCTCGTGTGCACTACTACTTTGATCTTAGTGCAATTGA  
ACCTATAGAGCCTGATGTTTATTGAGCTTCTCAATTTAGGGGAGTTTAGTGGGGAAAGTAC  
AATTGTAGATTCAATTTTTATCTGGGCATACAGTAGATCCTATAGCACCTTTTGAGTCAAC  
ATTTTCTATTGCAGATCTAGAAGACCTTTACTAGAGGACTTTAGTAATAGTCACTTATT  
TGTGCATTTTGAGGAAGAGGATGAACTTATATCTGTTCTACTCTTCCCTCCTGGCGCAGC  
AATAAAAAGCTTTTGTAGATGATTATGCAGATATTATAGTTTCATATCCTGAAATGGTAAA  
TGTAAAACAAAATTGAAATCCCTGCAACTACATTAGTGCCCTCTGAACCAGACATTAGACT  
AGATTGGTTTTCTCCAGATTATGATTTGCACCCTTCTTTACTTCGTAGACGACGCAAACG

CAAACGCAATATGTTTTGATGTTTTGCAGATGGCATTATGGCAACAACAACTGGGAAGC  
TGTTCCCTTCGCGCGCTAAACCTGTGGCAAAAATATTATCTACAGATGATTATGTTATTG  
GAACTCAGTTACATTTTCATGCTGGCACTGATCGTCTGTTAACAGTAGACCATCCCTACT  
ATGAAATTAGGAATGATGGAGATCCCCAACAAAATTGAGATTCCCTAAGGTGTCTGCATGCC  
AATATCGAGTGTTTAGGCTGAAATTGCCTGATCCAAATAAATTTGCCTTAATAGATCAGT  
CAATTTTCAATCCTGAACGTGAACGTTTAGTTTGGAAATTAAAAGGTATTCAAATTGGTA  
GAGGTGGACCACTAAATGTAGGTACTGCAGGTCATCCTTTATTTAACAAAGCTCCAGATA  
CTGAAAATCCTAATGATTATCCACCAGCTCAAACAGATGAAGACAGACGTAACGTGTCTA  
TGGACCCCAACATACCCAATTATTTATAAATTGGTTGCATTCCCTGCAGATGGTGAATATT  
GGGATGTTGCTAAACCATGTGTTGGAGATCAGGCGAATGCAGGAGACTGTCCACCTATAC  
AGTTAGTTAATGCTGTTATTTCAGGACGGAACAATGGGTGACACAGGTTTTGGGGCAGCAA  
ATTTTAAGAACTTTTTGCAAGACAAAGCAGGTGTTCCCTCTGGATATTATTAATGATATAT  
GTATGTATCCAGACTTCCTTAAATGGACAAAGATGTTTATGGCGATAAATGTTTCTTTT  
TTGGAACCGTGAGCAGTCGTATGCTCGCCATTTTATGGCTCGTGAAGGTAAAATGGGAG  
ATGCCATACCAGAGGGAAATAAATACTTATTGCCACCTACAAATGCTGTGAATTTTAAAA  
TGGGATCTCATGTTTATTTCCCTACTGCTAGTGGATCACTTACTACTAGTGATTCTAACT  
TATTTAACAGACCTTATTGGCTACAGAGATCTTTAGGTGCAAATAATGGAATATGTTGGG  
GGAATCAGTTATTTGTTACTGTTCTTGATAACAGCAGGAATACTAATTTTACTCTTTCCA  
TTTATAACTCAGGGAGGAGCTATTGGAAATCAGTATACTTATAAATCTCAAGATTTTACTC  
AGTATAACTCGACATGCAGAGGAATACGAATTGGAAGCTATATTCCAGCTTGTAGAGTTC  
CTTTGGAGCCTGATATTTTAGCTCACTTAAATGTTATGAATCCTAATATATTAGATGAAT  
GGCAATTAGCTTTTGTGCCTCCTCCTCCTCAGAGTATAGAGGACAATTATAGATATATAA  
CATCTTTGGCAACAAGATGTCTACTGAAAATCCTGCTCCAGAAATACCTGACCCTTATA  
AAGATTATAATTTTTTGGTTAGTTGATTTGCAAGAGAAGTTCTCCAGTGAACCTGACCAAT  
TTAGCTTAGGTCGCAAATTTTTGTTTCAAAGTGTTTGCTGCCCACAAAACGTGTCAGGA  
CAGTTGCCAATAGTTCTGTTAGAAATACTTCCAGAACAGTAAAAAGAAAACGAACACGAT  
AATTGCATATTTAAGATAATTACATCCTGAAGCCCATAAACTGTGAAATAATTGCTGTG  
ACTCTTGATCAACTTGGTACCAACTTGCTGATAATACTTGAAGGAATGTATTGATTAA  
ATAAATTGCTGCTATACCATCAGTTGAGTCATGGGGTCGTCATTTATGGTCTCCACCCGT  
CCACTCGACCTTATAAGTGTGGTCAGCAGGCTGGACAGGTAGTATTGTCCAGCGAAGTAA  
TCCAGCTGTCAAACCATTAAAGGTAAGTTGTTTGAACATAGCCGTCTCTCGAACGGAAG  
CGGTACAAAATGTGCCCTAAAGGCCTTTTAATAACCGTCTCTGGTATTTTGGCGCCTTTT  
TTTTTCGCGTGACTGCAAGTTCAGACACTCATGTATTGAGTCAGACACATGGCAGAATATG  
TTTTTGGCTGCCTGCCTATGTACCGGGAGTGGTGACCGGGAGTGGTGTTCACAGACATTA  
ACAATG

>gi|222386|dbj|D90400.1|PPH58\_Human\_papillomavirus\_type\_58\_complete\_genome

CTAAACTATAATGCCAAATCTTGTA AAAAAGTGGGTGTAACCGAAAACGGTCTGACCGAA  
ACCGGTGCATATATAAAGCAGACATTTTTTGGTAGGCTACTGCAGGACTATGTTCCAGGA  
CGCAGAGGAGAAACCACGGACATTGCATGATTTGTGTGTCAGGCGTTGGAGACATCTGTGCA  
TGAAATCGAATTGAAATGCGTTGAATGCAAAAAGACTTTGCAGCGATCTGAGGTATATGA  
CTTTGTATTTGCAGATTTAAGAATAGTGATATAGAGATGGAAATCCATTTGCAGTATGTAA  
AGTGTGCTTACGATTGCTATCTAAAATAAGTGAGTATAGACATTATAATTATTCGCTATA  
TGGAGACACATTAGAACAACACTAAAAAGTGTTTAAATGAAATATTAATTAGATGTAT  
TATTTGTCAAAGACCATTGTGTCCACAAGAAAAAAAAGGCATGTGGATTTAAACAAAAG  
GTTTCATAATATTTTCGGGTCGTTGGACAGGGCGCTGTGTCAGTGTGTTGGAGACCCCGACG  
TAGACAAACACAAGTGTAACCTGTAACAACGCCATGAGAGGAAACAACCCAACGCTAAGA  
GAATATATTTTAGATTTACATCCTGAACCAACTGACCTATTCTGCTATGAGCAATTATGT  
GACAGCTCAGACGAGGATGAAATAGGCTTGACGGGCCAGATGGACAAGCACAACCGGCC  
ACAGCTAATTTACTACATTGTAACCTTGTTGTTACACTTGTGGCACCAACCGGTTTCGTTTGTGT  
ATCAACAGATACAACAACCGACGTACGAACCTACAGCAGCTGCTTATGGGCACATGTACC  
ATTGTGTGCCCTAGCTGTGCACAGCAATAAACACCATCTGCAATGGATGACCTGAAGGT  
ACAAACGGGGTAGGGGCGGGCTGTACTGGCTGGTTTGAGGTAGAAGCGGTAATAGAACGA  
AGAACAGGAGATAATATTTTACAGATGATGAGGACGAAACAGCAGACGATAGTGGTACAGAT  
TTAATAGAGTTTATAGATGATTCAGTACAAAGTACTACACAGGCAGAAAGCAGAGGCAGCC  
CGAGCGTTGTTTAAATGTACAGGAAGGGGTGGACGATATAAATGCTGTGTGTGCACTAAAA

CGAAAGTTTGCAGCATGCTCAGAAAGTGCTGTAGAGGACTGTGTGGACCGGGCTGCAAAT  
GTGTGTGTATCGTGGAATATAAAAAATAAGAATGCACACACAGAAAACGAAAAATTATT  
GAGCTAGAAGACAGCGGATATGGCAATACTGAAGTGGAACCTGAGCAGATGGCACACCAG  
GTAGAAAGCCAAAATGGCGACGCAGACTTAAATGACTCGGAGTCTAGTGGGGTGGGGGCT  
AGTTCAGATGTAAGCAGTGAAACGGATGTAGACAGTTGTAATACTGTTCCATTACAAAAT  
ATTAGTAATATTCTACATAACAGTAATACTAAAGCAACGCTATTATATAAATTCAAAGAA  
GCTTATGGAGTAAGTTTTATGGAATTAGTTAGACCATTTAAAAGTGATAAAACAAGCTGT  
ACAGATTGGTGTATAACAGGGTATGGAATAAGTCCCTCCGTAGCAGAAAAGTTTAAAAGTA  
CTAATTAAACAGCACAGTATATATACACACCTACAATGTTTAAACGTGTGACAGAGGAATT  
ATATTATTATTGTTAATTAGATTTAAATGTAGCAAAAATAGATTAACTGTGGCAAAATTA  
ATGAGTAATTTACTATCAATTCCTGAAACATGTATGATTATCGAGCCACCAAAATTACGA  
AGTCAAGCATGTGCCTTATATTGGTTTAGAACAGCAATGTCAAATATAAGTGATGTGCAA  
GGGACAACACCAGAATGGATAGATAGATTAAACAGTGTTACAGCATAGCTTTAATGATGAT  
ATATTTGATTTAAGTGAAATGATACAATGGGCATATGATAATGACATTACAGATGATAGT  
GACATTGCATATAAATATGCACAGTTAGCAGATGTTAATAGTAATGCAGCAGCATTTTTTA  
AGAAGCAATGCACAAGCAAAAATAGTAAAGACTGTGGCGTTATGTGCAGACATTATAAA  
AGAGCAGAAAAGCGTGGTATGACAATGGGACAATGGATACAAAGTAGGTGTGAAAAACA  
AATGATGGAGGTAATTGGAGACCAATAGTACAATTTTTAAGATATCAAAATATTGAATTT  
ACAGCATTTTTAGTTGCATTTAAACAGGTTTTTACAAGGTGTACCAAAAAAAGTTGTATG  
TTACTGTGTGCGCCAGCAATACAGGGAAATCATATTTTTGGAATGAGTTAATACATTTT  
TTAAAAGGATGCATTTATTTTCATATGTAAATTTCCAAAAGTCATTTTTGGTTGCAGCCATTA  
TCAGATGCTAAACTAGGTATGATAGATGATGTAACAGCCATAAGCTGGACATATATAGAT  
GATTATATGAGAAATGCATTAGATGGTAACGACATTTCAATAGATGTAAAAACATAGGGCA  
TTAGTACAATTAAAATGTCCACCATTAAATAATTACCTCAAATACAAATGCAGGCAAAGAT  
TCACGATGGCCATATTTGCACAGTAGACTAACAGTATTTGAATTTAACAATCCATTTCCA  
TTTGATGCAAAATGGTAATCCAGTGTATAAAAATAAATGATGAAAATTGGAAAATCCTTTTTTC  
TCAAGGACGTGGTGCAAAATTAGGCTTAATAGAGGAAGAGGACAAGGAAAACGATGGAGGA  
AATATCAGCACGTTTAAAGTGAGTGCAGGACAAAATCCTAGACATATACGAAGCTGATAA  
AAATGATTTAACATCACAATTGAACATTGGAACTAATACGCATGGAGTGTGCTATAAT  
GTATACAGCCAGACAAATGGGAATATCACATTTGTGCCACCAGGTGGTGCCGTCATTGGT  
AGCATCAAAGACTAAAGCGTTTTCAAGTAATTGAACTGCAAATGGCATTAGAGACATTAAA  
TGCATCACCATATAAAACAGATGAATGGACATTGCAACAAACAAGCTTAGAAGTGTGGTT  
ATCAGAGCCACAAAATGCTTTAAAAAAAAGGCATAACAGTAACTGTACAATATGACAA  
TGATAAAGCAAACACAATGGATTATACAAATTTGGAGTGAAATATATATTATTGAGGAAAC  
AACATGTACTTTGGTAGCAGGAGAAGTTGACTATGTGGGGTTGTATTATATACATGGCAA  
TGAAAAGACGTATTTTTAAATATTTTTAAAGAGGATGCAAAAAGTACTCTAAAACACAATT  
ATGGGAGGTACATGTGGGTAGTCGGGTAAATGTATGTCCTACATCTATACCTAGTGATCA  
AATATCCACTACTGAACTGCTGACCCAAAAGACCACCGAGGCCACCAACAACGAAAGTAC  
ACAGGGGACAAAGCGACGACGACTCGATTTACCAGACTCCAGAGACAACACCCAGTACTC  
CACAAAGTATACAGACTGCGCCGTGGACAGTAGACCACGAGGAGGAGGACTACACAGTAC  
AACTAACTGTACATACAAAGGGCGGAACGTGTGTAGTTCTAAAGTTTCACCTATCGTGCA  
TTTAAAAGGTGACCCAAATAGTTTAAATGTTTAAAGATATAGATTAAAACCATTTAAAGA  
CTTATACTGTAATATGTCATCCACATGGCATTTGGACCAGTGATGACAAAGGTGACAAAGT  
AGGAATTGTTACTGTAACATACACAACGGAAACACAACGACAACCTGTTTTTAAACACTGT  
TAAAATACCACCCACTGTGCAAATAAGTACTGGTGTATGTCATTGTAATTGTATTGTAC  
AATTACTGTATGTAAACCACAAGCCAATATGTGCTGCTAAGTGTATATACAATGATATTA  
CCTATTTTTGTTGTTTGTATTTTACTGTTTTTATGCTTGTGCATTTTTTTGCGGCCATTG  
GTGCTATCTATTTCTATATATGCTTGGTTGCTGGTGTGGTGTGCTGCTTTGGGTGTCT  
GTGGGGTCCGGCTCTACGAATTTTTTCTGTTACTTAATATTTTTTATATATACCAATGATG  
TGTATTAATTTTCTATGCACAATACTTAACCAACAAGACTAAGTGTATATACTGGTTCTGCA  
CATGGTGGTATTGGTATTGTAAATATTTACTGTTGTGTGTGTTGTTTTTATTATTTTTATA  
CATTTACTAATAAATACTTTTTATATTTTTTAGCACTGTCTTATTATGAGACACAAACGGTC  
TACAAGGCGCAAGCGTGCATCTGCTACACAACTTTACCAAACATGCAAGGCCTCAGGCAC  
CTGCCACCTGATGTTATACCCAAAGTTGAAGGCCTACTATAGCAGATCAAATATTACG  
ATATGGTAGCTTAGGGGTGTTTTTTGGAGGTTTAGGCATTGGTACAGGGTCGGGTACAGG

TGGCAGGACTGGATATGTGCCCCCTTGGTAGTACCCACCGTCTGAGGCTATACCTTTACA  
GCCCATACGTCCCCCAGTTACCGTTGATACTGTGGGGCCTTTGGATTCTTCTATTGTATC  
TTTAATAGAGGAATCTAGTTTTATAGACGCCGGTGCACCAGCCCCATCAATCCCCTCC  
ATCTGGTTTTGATATTACCACCTCTGCAGATACTACACCTGCAATACTTAATGTTTCCTC  
TATTGGAGAATCATCTATACAACTGTTTCTACACATTTAAATCCCTCCTTTACTGAGCC  
ATCCGTACTCCGCCCTCCTGCACCTGCAGAGGCCCTCTGGACATTTAATATTTTCCTCTCC  
TACTGTTAGCACACATAGTTATGAAAACATACCAATGGATACCTTTGTTATTTCTACTGA  
CAGTGGCAATGTCACGTCTAGCACACCCATTCAGGGTCTCGCCCTGTGGCACGCCTTGG  
TTTATACAGTCGCAACACCCAACAAGTTAAGGTTGTTGACCCTGCTTTTTTAACATCTCC  
TCATAGACTTGTAAACATATGATAATCCAGCATTTGAAGGCTTTAACCTGAGGACACATT  
GCAGTTTCAACATAGTGACATATCGCCTGCTCCTGATCCTGATTTTCTAGATATTGTTGC  
ATTACACAGACCTGCATTAACCTCTCGCAGGGGTACTGTACGTTATAGTAGGGTTGGGCA  
AAAGGCTACACTTCGTACTCGCAGTGGAAAGCAAATAGGGGCTAAAGTACATTACTACCA  
AGACTTAAAGTCCCATACAGCCTGTCCAGGAACAGGTACAACAGCAGCAACAATTTGAATT  
ACAATCTTTAAATACTTCTGTTTCTCCCTATAGTATTAATGATGGACTTTATGATATTTA  
TGCTGACGATGCTGATACTATACATGATTTTCAGAGTCCTCTGCACTCACATACGTCCTT  
TGCCACCACACGTACCAGTAATGTGTCCATACCATTAAATACTGGATTGACACTCCTCT  
TGTGTCAATTGGAACCTGGTCCAGACATTCATCTTCTGTAACATCTATGTCTAGTCCATT  
TATTCCATATCTCCACTTAACTCCTTTTAAACCATAATTGTGGATGGTGTGATTTTAT  
GTTGCAACCTAGCTATTTTTATTTTGCCTCGCAGACGTAAACGTTTTCCATATTTTTTGC  
AGATGTCCGTGTGGCGGCCTAGTGAGGCCACTGTGTACCTGCCTCCTGTGCCTGTGTCTA  
AGGTTGTAAGCACTGATGAATATGTGTACGCACAAGCATTTATTATTATGCTGGCAGTT  
CCAGACTTTTGGCTGTTGGCAATCCATATTTTTTCCATCAAAAGTCCCAATAACAATAAAA  
AAGTATTAGTTCCCAAGGTATCAGGCTTACAGTATAGGGTCTTTAGGGTGCGTTTACCTG  
ATCCCAATAAATTTGGTTTTCTTGATACATCTTTTTATAACCCTGATACACAACGTTTGG  
TCTGGGCATGTGTAGGCCCTTGAATAGGTAGGGGACAGCCATTGGGTGTTGGCGTAAGTG  
GTCATCCTTATTTAAATAAATTTGATGACACTGAAACCAGTAACAGATATCCCGCACAGC  
CAGGGTCTGATAACAGGAATGCTTATCTATGGATTATAAACAAACACAATTATGTTTAA  
TTGGCTGTAAACCTCCCACTGGTGAGCATTTGGGGTAAAGGTGTTGCCTGTAAACAATAATG  
CAGCTGCTACTGATTGTCCTCCATTGGAACTTTTTAATTCTATTATTGAGGATGGTGACA  
TGGTAGATACAGGGTTTGGATGCATGGACTTTGGTACATTGCAGGCTAATAAAAGTGATG  
TGCCTATTGATATTTGTAACAGTACATGCAAATATCCAGATTATTTAAAAATGGCCAGTG  
AACCTTATGGGGATAGTTTGTTCCTTTTTTCTTAGACGTGAGCAGATGTTTGTAGACACT  
TTTTTAATAGGGCTGGAAAACCTTGGCGAGGCTGTCCCGGATGACCTTTATATTAAAGGGT  
CCGGTAATACTGCAGTTATCCAAAGTAGTGCATTTTTTCCAACCTCCTAGTGGCTCTATAG  
TTACCTCAGAATCACAATTATTTAATAAGCCTTATTGGCTACAGCGTGCACAAGGTCATA  
ACAATGGCATTTGCTGGGGCAATCAGTTATTTGTTACCGTGGTTGATACCACTCGTAGCA  
CTAATATGACATTATGCACTGAAGTAACTAAGGAAGGTACATATAAAAAATGATAATTTTA  
AGGAATATGTACGTCATGTTGAAGAATATGACTTACAGTTTGTTTTTCAGCTTTGCAAAA  
TTACACTAACTGCAGAGATAATGACATATATACATACTATGGATTCCAATATTTTGGAGG  
ACTGGCAATTTGGTTTAAACACCTCCTCCGTCTGCCAGTTTACAGGACACATATAGATTTG  
TTACCTCCCAGGCTATTACTTGCCAAAAAACAGCACCCCTAAAGAAAAGGAAGATCCAT  
TAAATAAATATACTTTTTGGGAGGTAACTTAAAGGAAAAGTTTTCTGCAGATCTAGATC  
AGTTTTCTTTGGGACGAAAGTTTTTATTACAATCAGGCCTTAAAGCAAAGCCCAGACTAA  
AACGTTTCGGCCCCTACTACCCGTGCACCATCCACCAAACGCAAAAAGGTAAAAAATAAT  
TGTTGTGGTACTTACACTATTTTATTATACATGTTTGTGTTTGTGTTTATGTATGTGTTGTCT  
GTTTGTGTTATGTTTGTGTATATGTTGTATGTGTTATGTGTCATGTTTGTGTACATGTTCT  
ATGTCCTTGTGAGTTTCCTGTTTCTGTATATATGTAATAAACTATTGTGTGTATTGTAA  
CTATTTGTATTGTTTGGGTGTATCTATGAGTAAGGTGCTGTCCCTAAATTGCCCTACCCT  
GCCCTGCCCTATTATGCATACCTATGTAATAGTATTTGTATGATATGTAATTTATAGTTTT  
TAACAGTACTGCCTCCATTTTACTTTACCTCCATTTTGTGCATGTAACCGATTTTCGGTTG  
CTGGCACAAACGTGTTTTTTTTTAAACTACAATTTAAACAATACAGTTAATCCTTTCCCTT  
CCTGCACTGCTTTTGCCTATACTTGCATATGTGACTCATATATACATGCAGTGCAGTTGC  
AAAATGTTTAAATTATACTCATAGTTTAAACATGCTTATAGGCACATATTTTAACTTACTT  
TCAATGCTTAAAGTGCAGTTTTTGGCTTGCACAATAGTTTGTATGCCAAACTATGTCTTGT

AAAAGTGACTCACTAACATTTATTGCCAGGTGTGGACTAACCGTTTTGGGTCACATTGTT  
CATGTTTCAACATTTTATATAATA

>gi|109390389|ref|NC\_008189.1|\_HumanPapillomavirus\_type\_101,\_complete\_genome

ATGAGAGGACAAAAGGCAACTATTGGAGATGTAAAGTTAGAACTTAGCCCTTTAGTGCTA  
CCTGCAAACCTATTATTATGTGATGAATTAGTAACCGAGGAGGAGCAGCAGGACGAGCAA  
GCTTTAAGCCCTTATAGAATTGTGACAGATTGTGGGCAGTGTACAAAACCTTAGCATT  
CATGTACTAGCTACGGACGGGGCAATAAGGCTCTGTGGAACAACCTGCTGTGTGGAGACCTG  
GAATTGGTGTGTGCAAGCTGCATAAGAGCCAGCGCCATGGAGGACAAAAGACAATAAAGG  
TACATCCCCCTCACATTTGTGACTATAATGCAATAGACTTTATTGACGCAGAAGCGGCATG  
TGAGGAGTTAGACCCCTTTGGAAGCCGTATTGGAAGAAAGTGATGGGACAGATATTTTCAGA  
CCTAATAGACAATACGGAGGAGCCAGATGAGGGAAATTCCCTAGCATTGTTAAATAAGCA  
GCAGCTAGAGGACGACACGCAGCAGCTTAAGATTCTAAAACGAAAGTACTTTAGTCCTAG  
CCCAAAGCAACAAGCAGTAATAGATTTGAGCCCAAGACTGCAACAGTTGCGTGTATCGTC  
CCAAGGATCCAGTAAAAGACGGCTGGTATTTGAGGACAGTGGACTAGGCAATGAAACTGA  
AGATTCTGTACGGAGGTGGCAAAGGTAGCGTCGGAGCAGCCATTAAGCTGCAACCCCGG  
GGAGCCCGAAACCAATGAAGACGTCAGCACAGATGTAGAGACTAGATCTGGGGGGCCATG  
TGGCGGCACAACAACCAGTAACAATAATAGTAACAACAATTGTATAGACCTATTGCATAG  
TAGTAATAGAGAAGCCACTGCATATGCAAAATTTAAAGCCACATTTGATGTGGGATATAA  
GGAATTAACAAGACCATTATAAGTAATAAAAGCTGTTGCTGCAGTTGGATAGCGGGGAT  
ATTTGGGGTGGTAGCAAGAAATACTGGAGGCAGCAAAAACATTACTGCAACCACATTGTGA  
ATACCTGCAAAATTATAAATCCAAGCATGGGGACGGGCGTTACAGTAATGATGTTGTTTCA  
GTTTTATGCTGCAAAATGTCGGGATACTGTAATAAATTTATTGTGTAATGTATTGCATGT  
ACGGGAATGGCAAATTATAACTAATCCACCAAAGCATAGGAGTGTTGCTGTAGCATTATA  
CTTTTATAAAAACAAGTATGTCTAATGTTAGCTATTGTTATGGAGCAATGCCAGAGTGGAT  
TAAAAAACAACATTGGTTAATCATCAACAGGAGTCAGACAACCTTTGAATTTGCAACTAT  
GGTGCAATGGGCATATGATAATAATATTAGAGATGAGGCAGAAGTTGCTTATGGATATGC  
AAGCCTTGACAGACGACGATACAAATGCAGCTGCATGGCTAAAATGTAATAATCAATTCAA  
ATATGTAAAAGACTGTGTACAAATGGTTGCAATGTATAAAAGGTATGAAATGAGAAATAT  
GACAATAGGACAGTGGCTAGTGAAATGTGGAGAACGTGTAACAGAAGAAGGCAATTGGAA  
AAATATTATTAAATTTTTTAAATATCAGGAAATATCTATAGTGGCATTTTTAACAACATT  
AAGATACTTCCTACAAGGAAGGCCAAAAAAGCTGTTTAGCAATATGGGGACCGCCTGA  
TACGGGCAAATCAATGTTTTGCTATAGCTTAATAAAATATACCCAAGGTAAGGTGGTATC  
GTTTGTAATAGCAGAAGCCAATTTTGGTTGCAACCACTAGTAGATGGGAAAATAGGGCT  
AATAGATGATGCAACATTTGCTTGCTATCAATATATGGATGTATATATGAGGAATGGACT  
GGATGGAAATGCAGTGTGAGTAGATGTAAAGCATAAGGCACCAATACAATTAAACTACC  
GCCATTACTTCTAACCTCTAACATTGAAGTACATGCAGAAGCCCCATTAAAATATTTACA  
TAGCAGAATTCAAGAATACAAATTTCCAAATAAATTGCGTTTAGATGCAAAATGGAAATCC  
AATAATAACAATTACTGATGCAGATTGGAAATCTTTTTTTAGTAAACTGTGGAAGCAATT  
AGACCTGGGCGATCCAGACGACAGCTCAGATGGAGACCCTGGTCGACCGTTTCGATGCTG  
TGCAAGACAGGCTACTGGGGATTTATGAAGCAGGCCGCACAGACATAGATGGACAAATAG  
TACATTGGGACCTTGTAAGGCAGGAATATGTATTACTGCACTATGCCAGAAAAACGGTA  
TTAGCAATTTGGGCATACAAAAGTACCGTCATTGGCCACATCTGAAAGCAAGGCCAAAC  
AGGCTATATTAATGGGCATAGTGCTAAAAAGTCTAAAGAACTCTGCATTTGGAATGAAC  
AATGGACATTGACAGATACAAGCTATGAACTGTTTATGACACCTCCATCGCATACATTTA  
AAAAACAAGGAAAAACCATAGAGGTGTGGTATGGAAATAATGAGGACAATGCAGTGGCAT  
ACACGTTATGGACCGCTATTTATTACCAAGACGCACAGGACAATTGGTACAAGGCCCGTG  
GACAGGTATCTGCAGACGGCCTGTACTATATAGACTGGGAAGGAAATAAACATTTCTATG  
TGCGGTTTGCAGATGAGGCACAACAATTTGATGCAGCAATGAATGGCAAGTACGAACTG  
AAAGTGAAATAATATCTAATCTGTTACCAGCACCCCCACGGAGCGACCCGAGGCCTA  
CTGGATCTTCTGCCATTACCTATGAAACTTCCAGACACGACACGAGGAGGACTAGGAGAT  
CTACTAAAAAGACCCCGACCGTCCCCCAGCTTCATCCGCGACATCGGCGACCGAAAGCGATA  
CCCCTGGGCACCATACCAGAAGCCGACGAATCCAACAAAGAAAAACATAAATCCCAACGAC  
CCAGGTGGGGATCCGAGTCTCCTATCCAGTCTCCTTCATCAGTGGGGCAAGGACATCGAC  
TGCCTAATAGACACTATCGTTTCGCGACTTGCAAGATTACAAGACGAGGCTAGGGATCCGC  
CAGTAATACTTATTAAAGGCCTGCAAAATACTACCAAATGTTGGAGGTATAGAATGAAAC

AAAATTATAGGGCGCTATTTGAAAGTATAAGCACTGCATTTTCATGGGTAGGTGATAGGG  
GCTCAGATAGGGTAGGGTGTAGTAGGGTATTAGTAGCATTTAGAAAATAATAGCCAACGGG  
AAAGGTTTTTACATACTGTGAAGTTACCAAAGGGTACACAGTTTTTCATTTGGAAACCTGG  
AATCCCTGTAACCACACATGCCAGTAATGCTGCCTATTTGTAAATAGCATCACATCTGCC  
TCTTGTGATTTTGTGTACCTTGTATATTATACCTCTTTTGTACTGCTTTGCTACACTTGT  
ATAATCAATGGAGCCTCCACATGCACGTAGGCGAAAGCGTGACACAGTTGAAAATATATA  
CAGGCATTGTGCCCTGTCTGGTACATGCCCTGATGATGTTAAAAATAAAGTGGAATAA  
TACCATTGCAGATAGGATATTAAAAATGGATTGCAAGTATTGTGTACTTTGGGGGCTGGG  
TATAGGTACTGGCAGGGGCTCCGGGGGATCTATGGGATATACCCCTGTAGGGGCTGGGGG  
GGGTAGGGTTACGTCCCAGGGTACTGTACTACGTCTGGGGTTGTTTTGGATCCTGTAGG  
ACCATCTGATATTGTACCCATTGATCCTATATCACCTACTGCATCCTCTATTGTTCTTT  
GGAGACTGTACCTGAAACACAAATACCTGATGTTCTGTGCGACCCCTGTGGAGGTGA  
ATTGGAGGTTACCGTTGGTACTGACCCTGTATCAGATATTACTATAGAGGCCACCTCGCC  
TGCTATTACCCCATAGACCCACAAAGTGCCGTTATTGAGGCACAACCTCCTACATCTAC  
TCCTAAGCGTGTTTCAGTAACAAGCACACGGCATGTTAATCCTTCTTACATATCGGTATA  
TGGCCATCCCACAGACCCTGTAACACAGGCTGGTGCTGAGGTGTTTGTAGGGGCAGCTGT  
TGGTGAGGGACGGGTTATTAGTATAGGTGAATCTATACCTTTAGACACATTTGTTGAAAC  
AGGAGGGTCTTCTACATTTTCTATTGAGGAGGCTGTTACGCCCCACGGACCAGTACCCC  
TCGTGATTTTCAAAGGCCCTTCAACGTGCACGGGACCTTTATAACAGACGTGTACAACA  
AGTACAAACACACAATATGGCTTTTCTTGGCGCCCCAGGCAGGCGGTAACATTTGAATT  
TGAAAATCCCGCTTTTCAGGATGAGGTACGCAGCAGTTTGAACAGGATTACAGTCTGT  
TGCTGCAGCGCTGACCCTGATTTTGCTGACATTGTAACATTGGGACGGCTCGCTTTTC  
TGAAACAGCAGAGGGGCGCGTGCCTTAGTCGCCCTAGGTGCGCGGGGCACTATTGTAAC  
ACGCAGTGGATTACAAATAGGATCCAATGTGCATTTTTTATTATGATTTTCAGCTCTATAGA  
TGCTGGCTCAGTTGAATTGCAACCACTTGGTCAGCAATCTGGGGTGGCCTCTATTGTTGA  
TGGCTTAGCATCTGCTAACATTAATGGCAGTGCTGAAACATCTTTTATAGAAGGTCATAC  
ACTTGTGTTGGCCCTACGGGTGAGGCTGACTTGTATGACACGTACTCAGAAAGTTTGAAG  
TTCTCGATTGTTACTTACACCTCAGGCAGTTCCCTGCTGTTTCAGGTCCCTCCTTTGGTTCG  
TGTCCTGACACTTCCTCCAGGCACAGCCCTACAAATCTTACTCTCAGATGTAGGGGGTCT  
TGTACCTTTTTCTGTGCCTTCTGTACATCCTGTTATTCTTGGCACTGTGTTCCAGATGT  
GTCTGAACCTCCTATTGTTGTGGATGGTTTTGATGCATTTGATACATTTTATTGTCATCC  
AAGTCACAGACGCAAACGCAAGCGCAAACGGTCTGGTTTTTAATGTTTTGCAGATGGCTG  
GTTTGTGGCTACCTCAGACTGGTAAAATATACCTACCTCCAGCTCCTCCTGTGTCTAGGA  
GTCTTACCACCGATGAATATGTTGTGGAACATCTGTATTCTTCCATGCATCCAGTGATC  
GTCTAGTAACTGTGGGTACCCCTATTTTCCCGTTATAAAACCAGGCAATCACACCGTTG  
AGGTTCCCTAAGTTTTCTGGCAACCAGTTTAGGGCTTTTCGCCTACGTCTCCAGATCCCA  
ATAAGTTTGCTTTAATTGACAAACAATTGTATAATGTTGAATCGGAGCGCTCGTGTGGC  
GTCTTAGAGGAATTGATATTGGCAGAGGAGGGCCTTTAGGTATTGGTTCTACTGGGCATC  
CTTTATTTAATAAGTTAAAGGATACTGAAAATCCTAATGGATATCAAAAAGGTGGTGCTA  
AGGACGCTAGACAAAATGTTTCTATGGATCCTAAACAAACACAGTTGTTTGTGTTGGTT  
GCACCCCTTGTAAGGTGAACACTGGGATGTTGCTCCTGCATGTGACAAAAATCCTCCTA  
AAGGCACCTGTCCCTCTTTACAGTTGGTGTCTCTGTTATTTCAGGATGGGGATATGTGTG  
ATATTGGCTTTGGTGCCATGAATTTTGCTGCCCTGCAGGCTGATCACTCAGGGGTACCCC  
TAGATATTGTTGCAGATACTTGTAAATGGCCAGACTTTCTTGGTATGGCCAATGATAGGT  
TTGGGGATGGTATGTTTTTCTTTGGCCGCCGCGAGCAGGTGTATGCACGTCATTATTTCA  
CCCATAATGGCACTGTTGGTGACAGTGTTCCAGAGGAGGGGTTTGAGGGTAATGGTAAAA  
AGTATTTTATTGGTGCTGAGCAAGGCCAGGACCAGCATCAGCTGGCTCCCTCTTTATATT  
TTGCTACACCTAGTGGGTCCTTAGCATCTAGTGACTCCAGTTATTTAGTAGGCCCTACT  
GGATTGAACGGGCTCAGGGTGCTAATAATGCTGTATTATGGAATAATAATGTATTTGTTA  
CTTTGGTTGATAATACCCACAATGTGAATTTTACTATTAATGTTGCTACAGAAGATAATA  
TTCAGTCCTATGATTCTGCAAAGTACAAGCACTACCTCAGACATGTGGAGGAATTTGAAA  
TTTCTCTCATTTGTGCAGCTCTGTAAAGTGCTCTTACTCCCGATGTATTGGCACACATAC  
ACTTAATGAATCCCTCTATTCTGGATGAATGGCAATTAGGTATTGCGGCTCCACCGTCTA  
CCTCTATTGAAACCACTTACAGATATATTGATTCTCTTGCTACAATGTGTCCACAGCAG  
AGCCTCCTAAGGAAAAGGAAGATCCATATGACAAAATGTCTTTTTGGGTGGTTGATTTAT

CAGACAGAATGTCCTCTGAATTAGGGGCTATCCTCTTGGTAGGCGCTTTTACATCAAA  
CAGGGTCTGCCCGGCTGCGCGCCCCCTAAAGCGACCCCGTCCTTCTACGCCTACCAGGC  
CTACCTCCAGGTCCTTCCAAACGCCGACGACGAGCAAGTTTAAACATTATATGTATTTTACA  
ACATTCTACCTCTGTACATTTTACATTTCTATACTCTTATAATAAATAAAGTATGTAGC  
ATGTCAACATTGTCGTTGTATGAGTTATTTCTTCTGACTCAGGGCAGTATTTTGGCCACA  
CCTGGGCTTTTAGTATTTGGCTTCCGGCCGGCGGACGTGTAGGGGCTCTGCTACATATTT  
TTCGTTTTTTATTGCTTTTGGAGGCACCGGTATCGGTTGCTGGTACATTTGCTGCCAATT  
TTGCCAGCAGGTATGTTTCATGTTTTTAAACAAATGTATTACTCATGTGTTTTGCAACGTTTT  
AGGTACTGGCTACATTCACAAACCGGGAGCGGTGCTTTTACAGTGCCTTTTTCTCTTATT  
GTTGTTGGCAACAATCATCTATTCCGTTTGTAAACATGAACCGGGAGTGGTGTGGGCAGTG  
TCTATATATACAGCAGGGGGCTATACAACGGTCCTTTTGCACCGCCTGTGTGCATGTA  
CTGGGAGGTAGACTGGGGACTGTGTAATGTTATGAATATTGTACCTATATTACTGCTTAT  
GTGGCAATTGTATATTTGTGTTGTGTTTTTAATTACTGTGCTTAGCCTTATTAAGATATT  
TTTATTGTTGGGAATACGGGTATAGGGACACGGCCAGTTGTAATATAATAGTACAAACT  
>gi|109390382|ref|NC\_008188.1|\_Human\_papillomavirus\_type\_103,\_complete\_genome  
ATGAGGGGAAAGAAACCAACAATTAAAGATATTAACCTAGAACTACATAGTTTAGTATTA  
CCACAAAATTTACTCTGTGGTGAAGAACTTGTGGAGGAGGAGGAGGAGGAGCAGGAAGAG  
CAGGATAAGTGTCTTACCGGGTGGTGACAGATTGCAAGTATTGTGAGAAGTCATTGTGT  
ATGTATGTGGTAGCCACGGAGGAGGCCATTAGAACTTTGAACAACAGCTGTGTGGAAAC  
CTGGATATTGTGTGCTCAGCCTGTGCAAGCAACGCCAGCGAAATGGAGGACAAAGACAC  
TAAAGGTACATCTTGCTTTACTGACATTACAGCAAATGCTTGTGAGTTTATAGAAACAGA  
AGCGACCTGTGAGGATGGTTTAGATTCATTGGAAGCATTATTTGAAGAGAGCGATGGGAC  
AGATATTTTCAGAACTAATAGAAAATATTGATGAACCTGATAGGGGGAATCCCCAAGCACT  
GTTAAATAGGCAACAGCTAGAAGAAGACAGTCAGCTACTAACAGTGCTAAAACGAAAGTA  
TGTTAGTCCTAGCCGAAGCAGCGGGTAATAGATTTAAGCCACGACTTGAAGCGCTGTG  
TGTGTCGCCACGAGGATCCAGCAGTAAAAAGACGACTATTTGAGGACAGTGGCTTAGGACA  
TGAGCCTGAAGATTCTAATGCTGAGGTGAAAAGGTAGCGTCGGAGGCATTGACTAATTC  
AGGGACATTGACTAATGGGGATGAAAATGCTGTATGTGCAACGCAGGATGGCGACACACG  
GTGCTTGATATTTTACACAGCAGTAATAGACAAGCTACTGCTTTAACTAAATTTAAAAA  
TGTTTTTTGGAGTGGGATATAAGGAAATAACCAGGCCATTTCAAAGTAATAAGTCATGTTG  
TCATAGCTGGGTAGCAGCAATATTTGGTGTGTAGCAGAAATGTTGGAAGCGGCTAAGAC  
GCTATTTAAAGTGCATTGTGATTATTTACAAATTATTAATCCTAGTATGGGTACAGGAGT  
TACTGTATTATGCTTGTGTTTTGAGTTTTCAAGTTCTAAATGTAGAGATACTGTACAAAACT  
GATTAGCAATGTGCTAAACGTGCAGGAACATCAAATAATAACAGATCCTCCGCGACATAG  
AAGTGTACCAGTAGCATTGTTTTTTTTATAAACAAAGCATGTCTAATAACAAGTTTTGTACA  
TGGAACAATGCCTGACTGGCTTAAAGACAAAATATGCTAAACCACCAGCAGGAGGCAGA  
CTCATTTGAACTGTCTCATATGGTGCAATGGGCATATGACAATAATATTTGGGATGAAGC  
AGAATTAGCCTATCAATATGCATGTTTAGCAGATGTGGAACCAAATGCAGCAGCATGGCT  
AAAAAGCAACCAGCAATATAAGTATGTGTCAGATTGTGCAAAAATGGTTAGAATGTACAA  
AAAGTATGAAATGCAACAAATGAGTATGGCACAGTGGATAAAAAAATGTGGAGAGCATAT  
AGAAACAGACGGAGACTGGAAAAAAATTATAAACCTATTAATAATATCAGGAAATATCAGT  
AATAGCATTTTAAACAAGTTTTTAGAATGTTTTTAAAGGGACAACCAAAGAAAAACTGTAT  
AGCACTATGGGGACCTCCAGATACTGGCAAATCTATGTTTTGCTACAGCCTAATTAGATA  
TGTAAGAGGTAAAGTAGTATCATATGCTAATAGTAAAAGTCAGTTTTGGTTACAACCACT  
AACAGATGCTAAATTGGGGCTTATAGACGATGCTACATTTCCATGTTTCCAATTTATGGA  
TGTGTATATGAGAAGTGCTTTAGATGGAAACGAGGTGTCTGTGGATTGTAAGCATAGGGT  
ACCAGTGCAAAATTAAATTACCTCCATTACTTGTACCTCCAACATAGATATGCATTCGA  
GGCCTCTTTAAATACCTGCAGAGTAGAATTACAAGTTTTAAGTTTCCACATAAACTTCC  
ATTAGATACAAATGGAAATCCAATATTTATTATAACTGACACAGATTGGAATGTTTTTTT  
TAGCAAGCTGGAGCAGCAGTTAGACCTTTGTGACCCAGAAGACAGTACAAATGGAGACCC  
TGGTGGAGCGTTTCGATGCTGTCCAAGAGAACTACTGGGGCTTTATGAGGCCGGACGCT  
CAGACCTGGAATCCCAAATACAACACTGGGATCTTGTAAAGGCAGGAGCATGTACTGCTAA  
ACTATGCCAGAAGGCAGGGCATACAAAACATTGGGCCTACAAAAAGTGCCCCCATTTGGCAG  
CATCTGAAAAGCAAAGCCAAAACCTGCTATTATGATGCAGTTGGTGTGAAAAGCCTAAAGA  
AATCCCAATATGGGCAGGAACCATGGACATTAACAGATACAAGCCATGAACTATTTACCA



CAGCACCAGAGAATACATTTAAAAAAGGAGGTGTAACGTGTGGAAGTGTATTTGACAACG  
AGGAAGAAAAAGCTATGCCATATACACTATGGAGACTAATATATTATCAAGATGCAGATG  
AGCTGTGGCATAAAACACATGGACAGGTAGACGCGGATGGCCTGTACTTTATAGACATGG  
TAAAGCAAAAACACTATTATGTGCATTTTACCAAGGAAGCAGTAAAATATGGACAAAAAG  
GGATGTGGCAAGTGAGGACTGGAAGTGTATTTATTTGGTCCTTCTTCTATCGCTAGCA  
CTTCGACGGGGGCCGAGCAAGGTGACACCACCGCACAAAGTCACCCGAAGCGCCAGAAAAG  
GCAAACGACGAAGACATTCCAGAAGGCAAACCCCTCGACCACCTCGACGACCACAGAGA  
CCGACTCAGAGGATTCCGGCTTCCGAATATAGAAGAAGAAAGCGAAGACACAGAGAACGAA  
AACGATCCAAGCACAGGTGGGACACAGGTTTCAAGATCTTCTACTGACACTGCTGCAGCAG  
TGGGATCGCGACATCGAAGCCCTGATAGAACTATCCGTCAAGACTTGCAAGGCTACAAG  
CGGAGGCTTGGGATCCCCAATATTATTAGTTAAAGGGCCTTCAAATACATTGAAATGTT  
GGAGGTACAGGTGTAGAATAAAATATAGAGGCTTATTTTCAGTGTATTAGCACAGCTTTTA  
CATGGGTGGCGGATGCGGGTCCACAATTAGGAAATGCTAGAATAATAGTAGGATTTACTA  
ATACATCACAAAGGGAAAAGTTTATACAAACTGTGAAATTACCTAAAGGCACAAGTAGTG  
CATTAGGAAACCTTGATTCAATTTTAAAGCCAATAATGCTGCCAATGGTCCCTGTATATTA  
TCCTAACCTTACATAGGTATAAGTGTATGTACTATATATGTTGTAAATAGCTTACATGG  
ATGTACAACCGAAAAAGCGACAAAAACGGGATACTGTGGAATAATATATAAACATTGTG  
CAGGGTCAGGCACATGTCTTGAGGATGTTAAAAATAAAGTAGAGCAAACAACATTAGCAG  
ACAAACTGTTAAAAATGGGATTTGCCAGTGTGGTTTACTTTGGGGGTCTGGGTATAGGCACAG  
GTAAGGGTACTGTTGGGGCTCTGGCTATGTTCCCATTTGGGTCTGGGGTCTGCAGGTGGGG  
GTCGGGTAAACATCACAGGGTACTGTAGTACGTCCGGGTGTTGTGGTAGATCCTATTGGGC  
CTCCTGATATAGTTCCATAGATGCAGTTACACCACAGTCCTCCTCTGTGGTACCATTAG  
AGGTAATACCTGAGATTGTTGGCGACCTTACGCCCCCTGATATATCTACTCCTAATATTA  
TTACTGTAACAGATCCTGTATCTGACATAACACTAGACACCACCTCTCCTGCTGTTGCTA  
CTATTGACCCACCAGTGCTATACTGGAGGTGCAGCCCACTGCATCAACACCTAAAAGGG  
TCTCTGTAGGCAGTAGCAGACATGTTACGCCATCATACTCTCTGTATATGGGCATCCTA  
CAGACCTGTTACACAATCTGCAGCTGAGGTGTTTATAGGGGGTCTGTAACAGAAGGAT  
CTGTTGTCAATATTGGGGAATCTATACCATTAGAAACATTTGTGGAACACAGGGGTCTG  
CCACATTTGATATTC AACCTACTGCAGAGCCACCACGTACTAGTACCCCTCGGGCATTTT  
AAAGAGCATTCCAAAGGGCTCGTGAATTATATAATAGGCGGGTTCAACAAGTTAGAACTA  
GGAACATAGATTTCTTAAACCGCCACGACAGGCGGTTACTTTTCAATTTGAAAATCCCG  
CCTTTGAGGATGAAGTTAGTCTTGTATTTGAACAGGATTTAAATGCCTTAGCTACTGCTG  
CACCAGATCCTGATTTTGTCTGATGTTGTGCGTTTAGGTAGGCCTACTTTATCTGAACTC  
CTGAAGGCCACATTAGACTAAGCAGGTTGGGTCAACGTGGCACTATTCGTACAAGAAGTG  
GCCTGCAAATAGGTCCACATGTACATTATTATTATGATTTAAGTAGTATCCACCCTGACT  
CATTTGAATTGCAGCCTTTAGGTCAGCATTCGGGTGACACAGGTATTATTGATGCAGCAA  
CAGCACAATCTATTGTTGCAGACACAGCTGAATCTAGTTTTATAGAAGGTCAAACATTAA  
TAGGCCCCACAGCTAGACAATGAGCTGCTTGATTCTACAACCGAGGATTTTAGCTCCTCTC  
GTCTCCGATTTGCAGGGGTTACCATGGCATCCAGTTTCCCTCTTTAGATATTGTTACTT  
TACCACCTGGTGTGCTGATTACAATTTGTTGTCACTGCATCCGCTGGTAAACATAATACTA  
CAACTATTATTCCACAATATATCCCCACTACACCTTTTATTCTTCTGTGGTAGTAGATT  
CCTTTGTTACTTCTACTACATTTTATTTACATCCTGGACTGTCTCGCAAACGCAAACGTT  
CGCATATGTTTTAATATTTTGCAGATGTCTTTGTGGCTGCCACAGTCCGGTAAACTTTAT  
CTACCACCTTCTCAGCCAGTGGCTAAAATACTGCCTACTGATGAATACGTTGTGGAAACG  
TCTATTTTCTTCCATGCCTCCAGCGACCGCTGCTTACTGTAGGACACCCATATTTTCCA  
ATTACAAAAGTGGGTGAAGGTACAATTGTTGTACCTAAGGTATCTGGTAATCAATTCAGG  
GCCTTTCACATCCTTTTACCTGATCCTAACAAGTTGGCACTTGTGGATTCCAATATATAT  
AATGCCGAGTCAGAACGGCTTGTGTTGGAAGTTACGGGGTCTGGATATTGGTCGTGGTGGA  
CCCCCTAGCGTTGGCTCTTCTGGACACCCCTTTATTTAATAAACTTAAGGATACTGAAAAT  
CCTAATAGTTATGTTAAAACAGGAAAGGAAAACAGACAAAGTGTCTCTATGGACCCAAAG  
CAAACCTAGCTATTTGTAGTAGGCTGTACTCCTTGTGTTGGGGGAGCATTGGGATGCTGCA  
AAGCCATGTGCAGATGCTAGGCAGGATATGGGTGCATGTCCTCCTTTAGAGCTTGTAGT  
TCCATTATTGAGGATGGGGATATGTGTGATATTGGCTTTGGTGCAATGAATTTTGCTACA  
TTGCAGGAGGACCATTGAGGTGTACCCTTGGACATTGTAGCTTCTAAATGTAAATGGCCT  
GATTTTCTTAGAATGGCAAATGACACATATGGCAATCAAATGTTTTTCTTTGGAAGACGT

GAGCAGTTGTATGCTCGCCACTTTTTTGGCTAGGGATGGTGTTCATGGGCGACAGTATACCT  
GAGGCTGAATTTGAGGGTGTAAAGCACACCTATATTTTACAGGGGGCGTCTGACAAAGAC  
CAAAATACAGCCTCCTCGTCTGTTTACTATGCAACCCCCAGTGGATCACTGGTTTCTAGT  
GATTCTCAGTTGTTTGGCAGACCATACTGGATACAAAAGGCTCAGGGCCCTAATAATAGT  
GTGTGTTGGAGAAATAATTTATTTATTACATTGGTTGATAACACACACAATGTAAATTTT  
ACAATAAATGTTAAGTCAGACGCTGGCGTTGCACAGCAATATGCTGCCACCAGCTATAAA  
CATTATCTGCGACATGTAGAGGAATTTGAGATTGCTCTTATATTGCAATTATGCAAGGTT  
CCTCTCACAGCTGATGTATTAGCCCATATACATGTAATGGATCCAGCTATAATTGAGGAC  
TGGCAGCTAGGGTTTGTACCACCGCCTCCTTCTTCTATTGGAGATACATACAGATTTTTTA  
ACATCTTTAGCCACACGCTGCCCTGCTGCAGAACCTCCCAAGGAAAAACAGGACCCATAT  
GATAAATTATCTTTTTTGAAGGTGGATCTTACAGAACGTTTGTCTCTGATCTTGACAGA  
TATCTTTGGGTCGCAGATTTTTTATCTCAAACCTGGGGTTAGCTCGTCTTCTACCTCCTCT  
AGAAAGCGGTCTCGTGTAGAGACCCCTACCCGCCAGTACGGTCTGCTAAAAAACGTAGA  
CGGGGGGTTAATCTATGGCATTACCTGTGTTGCACATGCACCTTTATATTTTTGTTCTTG  
TATCAACTGCAGTACTGTGTTAACTTGTCTGTACATTCTTAACTTATATTACATTTAA  
GGGTATTAAATATATTTGTTCATGGTACCGGTCTCTGCGTGATTTGTTATTGAGTCATGTA  
AGGTCAATAGCCACACCTGGCTTTTAGTCTTTGGCTTCCGTCCGGCTTGACGTGCAGGG  
GCTATACACACTGTTTTTTGGATACTTCTTTAATAAAGCTTTCTTTTCAGTGAAACCGAT  
AACCCTCGCCAACCTCCGTTGCCAAGCTTTTCAGGTATGTACTTTGCAAGTTTCAACAACAAG  
ATTACTCAGCCTTCCAGCAACCAATTAGTTATCTGGCCGTTGGCCACGACCGGCAGCGA  
TGTTTTGTAAATATCTTGATCCTATGATTTGTTGGCAACTACCACCTATTTCCGTTTGC  
TTTACTAACCAGGAGAGGTGTATACTATATAAAGTAGAAGCTGTATTGGGCAGTTCTCTT  
TTGCGTGGTTGTACCCCTGTGTGGTGGATGGTGGTGGGCTCTGGGAAATGAATATTGTTT  
CATTCTTGTATTATTGTATGGCAATTGTATTTATGCTGTGCGTTTGTTTTAACTGTAATAT  
GCATGTTAAAAATATTTTTATGTTTAGCTATTAGAGTGTAACTATATATATGCGGGATTT  
GGCCAGTACTTGTGTATGTATAGTGTATAAAAGGTGTGTAAATACAGTAGCGGTGTGAT  
AAA

>gi|50253426|ref|NC\_005134.2|\_HumanPapillomavirus\_type\_96,\_complete\_genome  
TAAGGTATGTGAGTAATTTTTGAACCGCCCTGACTAATCTAAACATGCTAACCGCACCC  
GGTATAAGCTATAAAATATCCTGAGGTGATGCAGTATCTGATCCTGGCAGTCACTCCTGG  
AACACACCGATCCAGTGGCTTTGCCAAAAGCAGTTTAAACCTGCCAAGAAAAGCCCGCC  
AAAACGTCTGCCAAGCTTTGGAACCGTTAACGGTAAGTTTCGCAACTCTCTCGGTTGCCAA  
AAGTTTTATCTTGAGAGGTTGTTGGCAATTACAACCTGCCACTCATAACAAGTAACCGC  
CTGCGTTTCTAGGACATTTTATATACAGACATACAGATCTCTGTTCAATTGTTGAGATGGA  
TTTAAAGACAGTGCAGCAACTTAGAAGTCATTTGGGCATTCTACTGAAGACCTGTTGTT  
AGCCTGTAACCTTCTGTAAGAAATTTTTAACCTTTGAGGAGCTATTAGGATTTGATAGCAA  
GACTTTAAATCTTATTTGGAAGGAAGGTTATGCATATGCGTGTTGTTTCAATTGTGCTAG  
AACAGTAGCCAAAGTAGAATTTGAACATTTTTTATGAAAAACAGTCAAGGGACGAGAAAT  
AGAATCTCGCAGTGGCAGTTTACTTTGTTGTATTGTTGTTAGATGCCAGTTTGTGTTGCG  
ACTGTTAGATTATTTAGAAAAGTTAAATATTTGTGGGTATCAAGAAAACCTTTATTTAGT  
AAGAGGAGGTTGGAAAGGCATTTGCAGATATTGTAGAGAGATATGATTGGGAAAGAAGCA  
ACTATACCAGACATAAAGCTGGAGCTGCAAGACCTTGTCTGCCCATTGACCTGCATTGT  
GACGAAGAGTTGACAGAAGAGCAGTCAGAAAACCTGTCAGAATCTACAGTAGCAGAGGTG  
GAGCCTCAGAGAACTCTGTACAAGATTGTAGTACCGTGTGGAGGCTGTGATTCCCGGCTG  
AAAATCTACGTTTCTGCTACACAGTTTGAATTCGTTCTTTAGAAGACTTGCTGCTAGAA  
GAACCTTCTTTGCTGTGTCTGCTTGCAGAAATGGCAGATAATAGAGGTATTGATCCTAA  
AGAAGGGTGTAGTAATTGGTTTTCTCTTGAAGCAGACTGTAGTGATTTAGATGATGATTT  
GGAAAGCTGTTTGAAGAAGGGACAAATTCAGATTTATCTGATTTAATTGATGATGGGGA  
TGCTTGTGATAATGCCAATGAGCAGGGAATTTCCCGAGATCTCTTTCGCCAGCAGGGGAG  
TGAGGAGTTTGAGCAGCAATAACAGGACTTAAAACGAAAGTATTTTCAGTCCGAAAGAGTT  
GCAGCAGCTTAGCCCTCGTTTGAAGCAATACCTTTGTGCGCCGCAACACAAATGTAAAAA  
GCGGCTATTTATGGAACAGGACAGCGGGCTTGAGTTATCATTAACCTCATGAGTGTGAAGA  
TACTGCTCCGGAGGTGGAGGTACCCCCAAAATACTGACGGCACAGCACGGACAGAAGTTCA  
GGCGAGCAATGAGCATTATAGACTATTGTTAAAATGCAGTAATCTCAGAGCTACAATGCT  
CAGCAAAATTTAAAAACAGCTTTGGGGTGGGGTTTATGGAAGTGTGTAGGAAATTTAATAG

CAATAAGACTTGTGTGTCGGGACTGGGTGCGTAACTGCATATGGAGTTAAAGAGGAATTATT  
AGAAGGATGTAAGCAACTGTTACAAGAACATTGTGGTTATATATGGCTTCATACACTATG  
TCCAATGTCACCTCTTCTATTGTGTTTTAAACTGGTAAAAGCAGAGATACAGTTGTAAG  
ATTGTTACAAAGGATGTTAAGTATTCATAAAGAGCAACTCTTAACTGAACCACCAAAGTT  
ACGAAGTGTTATGGCTGTACTTTACTGGTATAAGGGCAGTATGAATCCAAATATCTATGC  
ATTTGGGGAGTATCCAGACTGGATTGTTTCAGCAAACGATGATTAGTCACCATGAGGGCGA  
TAATTTGCAATTTGAATTGTCTCCTATGGTACAATGGGCCTATGACAATGACTATATCGA  
AGATTCTGACATTGCATATAACTATGCTAAATTAGCTGACGAAGACATAAATGCTCGCGC  
GTTTTTAGCTCATAATAACCAAGCAAAAAATTGTTAGAGATTGTGCTTGGATGGTAAGACA  
TTACAAACGAGGTGAAATGAGATATATGTCTATTTCTAAATGGATATGGTATAAATTTAA  
AAAAGTAGAAAAATGGCGGCCACTGGTCAAAACATAGTAAAATTTGTTAGATTCCAAGGTAT  
AAATTTTATAATGTTTTTAGATGCCTTCAAAACACTTCCTTTTGTCTAGAACAAAAA  
CTGTATTTTATTTTATGGTCCTTCTGATTGTGGCAAACGATGTTTTGCATGTCACTAAT  
TAAAGCTCTCGGTGGTAGGGTGATTTCATTTGCCAATGCAAAAAGTCAATTTTGGTTACA  
ACCTTTAACGAAAGCAAGATTGCTATGTTAGATGATGCTACAGAAGCTTGTGGAATTA  
TTTAGATACCTATTTAAGAAATGGTTTAGATGGGAATTGGGTAGTGTGATTGCAAACA  
TAAAGCTCCCATACAGATTAGATTTCTCCATTATTGATTACCTCCAATTATGATATTTT  
AAAAAATGAGAGGTATAGATTTTTGGTTAGCAGAATTTAAATATTTGAATTTAAGAATAA  
ATTTCTTTTAAATGAAGATGGTACCCCTATGTTTGAACCTTACTGACCAAAGCTGGAAATC  
TTTTTTTCAAGGCTTTTGGAAAGCAGTTAGATCTAAGTGACCAAGAAGACGAGGGGGAGGA  
TGGAGCTCTGAACCAGCGTTTCAATGCTCTAGAAGACCAGCTCATGGACATATATGAAC  
AAGGGAGTGATAAATTAGAAGATCAAATAAAACATTGGAACTTTTTAAGAAAAGAACAGA  
TTTTATTGCATTATGCCAGGAGGCGAGGCATTATGCGTTTGGGGTACACTCCTGTTCCCTA  
GTTTAGCAGCTTCAGAAACAAAAGCTAAAGATGTTATTTACATGGTTCTTCAACTAGAGA  
AATTAAGAGACTCACCTTACAAAGATGAACCTTGGACATTGATTAACACCAGTTTAGAAA  
CATATAGAGCTCCTCCTGTAACTGCTTTAAAAAAGGTCCTCAAAATGTAGAGGTTATTT  
TTGATGCAGATCCTGAAAATATTATGTTATACACATCCTGGCAGTTCATTTACTTTGAAG  
ACACTGATGGACATTGGCAAAAAACTGAAGGGCGTATTGATTATGCTGGTTTATATTATT  
TGGAAGGGCAATTAAGACATTATTACGTGGAATTTAAAGTAGATGCTCGCAGATTTGGAA  
CTAGTGGAGAATGGGAAGTGCCTTTTAAACGGGGAACTATCTTTGCTCCTGTTACCAGCT  
CCTCGCCGTCCTCATACGAAGAGGTCAGAGAACGGGCTGAGCCCCCGACGTCCTCCGAGG  
TCGGAACCGCCCTGACTCCGGCACCTACAGACTGGGAGACCTGGAACCGAAACCGCCA  
AAGGGCGAAGGTACGGACGAAAAGAATCTAGTCCTACAGTTGCCTCCCTCAGGGTCAGGC  
AAAAAGTATCACGATCTACTACACGAAAGCCGAAGAACGACGGTCCCGGAGTCCATCGT  
CAGGGACAGAGCAAGCCGGTGCACGGGGACGGGGACAACGGGGAACCAGGGCCCGTTCCA  
GAACCAGAAGCAGGAGCAGGCGCCGGAGCAGGAGCAGCAGCAGAGCCAGAAGCAGGAGGG  
CAAGGGAACACTCAGAATCGAGGGGAGGGAGAGGTAGAGGGGCGTACGCCACAAGATCCA  
GAAGTAGATCTGCAGAGTGCAGATCTATTGACCAGTGTGGCATTCCAGCTTCACAAGTGG  
GAAGGTCAAGTTCAGTTGGTAGAAACAATTCCTCGAGACTTAAGAGATTACTGGATG  
AAGCTCTCGACCCCCCAGTGATATTGTTAAGAGGGGAACCAAATACTTTAAATGTTATC  
GCTACAGGGTGAAAGACAACTTAGAGGCTCTTTTGATAAAATTAGTACAACATGGTTCAT  
GGGTGGCTTCACAAGGTAATACACGCATAGGTAGAGCTCGCATGCTGCTTAGCTTTGTTT  
CAGAAGATCAGAGGGAAAAATTTATCAATGTTATGAAATTACCTAAGGGTGTTGATTGGT  
CCTTTGGTAGCTTTGATAGTCTTTAACTACTAACATTTTATTTTTTATACTAATAACTA  
ACCCACTTTATATATTGTATGGCGCGCGCACGTAGAGTAAAGCGTGATTCTGTTACAAAT  
ATTTACAGGGGCTGTAAGGCAGCTGGCACATGCCCCCTGATGTTATTAATAAAGTTGAA  
CAAAAACTATTGCTGACCAATTTTAAAGTATGGCAGCACCCTGCGTTTTTTGGTGGG  
TTGGGTATTAGTACAGGCAAGGAACCTGGAGGCAGTACTGGTTATGTCCCTTTGCCTGAA  
GGACCTGACCTGGTGTTTCGCTGGGTGGGTACACCAACTGTGGTGCGCCCCGGGGTCATT  
CCAGAAGCAGATTGGTCTCTACTGATATAATACCTTTGGATACAGTCAACCCATTGACCCT  
GTTGCACCTTCAGTTGTCCCTCTTACAGACACAGGACCTGATTTGTTGCCAGGAGAAATT  
GAGACCATTGCTGAGGTACATCCTGTGTCAGATGTAACACCTGTTGACACACCAGTGGTG  
ACAGGTGGTAGAGGCTCGAGTGCAGTATTAGAGGTTGCTGACCCAAGTCCTCCCACTCGT  
GCACGTGTCAGTAGAACACAATATCATAACCCAGCTTTTCAAATAATATCTGAAACAACA  
CCAACAACCTGGGGAAGCGTCGTTATCTGACCAAATCATTGTACAATCAGGTTCTGGAGGA

CAAAATATTGGTGGTAGTGGGCCTTCTGTGGAAATAGAATTAGAAGAGTTCCCCACAAGA  
TATTCATTTGAAATAGAAGAGCCAACCCCTCCTAGAAAACTAGTACACCTGTAAGAATG  
GCTCAGCAGGCCTCACGAGCTTTACGTAGAGCTTTATACAATCGTAGATTAACACAACAG  
GTTTCTGTAGAAAATCCTCTATTTTTTACAACAGCCTTCTAAATTAGTTACTTTTCAATTT  
GATAACCCCTGCATATGAGGAGGAAATAACACAAATATTTGAGAGGGATTTAAGCTCCATT  
GAAGAACCTCCAGATAGACAATTTATGGATGTTGTTAAATTAGGTAGGCCTACATATGCT  
GAAACACCAGAAGGTTACATTAGAGTCAGTAGACTTGGGAAACGAGCAACCATCAGAACA  
CGCTCTGGAGCACAGGTTGGCACTCAAGTTCACCTTTTACAGAGATATAAGCACTATTGAC  
ACAGAACCCCTCCATTGAATTGCAACTGTTAGGGGAACATTCTGGGGATGCTAGTATTGTT  
CAAGGCCCAGTAGAAAGTACATTTGTTAATATGGATGTACAAGAAATTCCTACTTTGGAG  
GAAGTGCCAGAATTACATTCTGAAGATGTGCTATTAGAGGAGGCATTAGAAGACTTTAGT  
GGAGCACAATTAGTTTTTGGAAATTCTAGAAGATCAAATGTAATAACTATTCCTAGATTT  
GAGACTCCAAGAGAGATTAATATTTATACACCAGATTTAGATGGATATTACATATCATAT  
CCAGAAACAAGGAATATTCAGAAAGTTATATACACTGAGCCAGACACGACTCCAACAATA  
ATAATTACATACAGAGGATTTTCAGTGGTGATTATTATTTACATCCAAGTTTGAGACGAAGA  
AAAAGAAAACGAGCCTATTTGTAATTTTTTGCAGATGTCATCATTGTGGTTGTCAACAA  
CGGGTAAGGTCTATTTACCACCATCAACACCAAGTTGCCAGGGTGCAAAGCACGGACTCCT  
ACATACAAAGAACAACATCTATTATCATGCTAATACTGACCGCCTGTTAACAGTAGGAC  
ATCCTTATTTTGTATGTAGGAGAAAATAATGGAGATCATGAAGTGTTAGTTCCCAAGGTGT  
CAGGTAATCAGTACAGGGCCTTTAGGGTACACTTACCGGATCCTAACAGATTTGCTCTAG  
CTGACATGTCTAGTGGTAAATCCTGATAGGGAGCGTTTGGTATGGGCTGTTAGAGGAATGG  
AAATTGGTTCGTGGACAGCCATTAGGTGTAGGTACATCAGGACATCCATTATTTAACAAGG  
TGAAAGACACGGAAAATCCAAATGGCTATAATACAGGTGGAAAGGATGATAGGGTGAATA  
CATCCTTTGATCCCAAACAAATTCAAATGTTTGTGTTTTGGGTTGTATACCCTGCTTGGGGG  
AACATTGGGACAAGGCCTTACCTTGTGTAGAAAATCCTCCTGATCAGGGAGCGTGTCCAC  
CTCTAGAATTAAAAAATACTATTATTGAAGATGGGGACATGGGAGACATAGGGTTTGGAA  
ATCTTAATTTTAAAACATTATCAGTCACTAAGTCTGATGTTAGTCTGGATATTGTTAATG  
AAATTTGCAAGTATCCAGATTTCTTAAAAATGGCTAATGATGTGTATGGCAATGCTTGCT  
TCTTTTATGCCAGAAGAGAACAATGTTATGCCAGACATATGTTTTGTAGAGGTGGGTCTAG  
TAGGAGACAGTATTCAGATGATGCAGTTGGAGAAGACAACCATTATTATTTAAAGGCTG  
CCAGTGATCAAAACAGAGATACAATGGCAAGTTCATTTTACACTCCCACAGTCAGTGGAT  
CTTTAGTTTCTACAGATGCACAGATTTTCAATAGGCCTTTTTTGGCTGCAAAGGGCTCAAG  
GCCATAATAATGGTATTTGCTGGGGTAATCAAATCTTCTCACAGTAATAGATAATACCA  
GGAATACTAATTTCTGTATCAGTGTCTCCTCAAATGATCAGGCATTACAGGAATACAATA  
CTGCAAACTTTAGAGAATATTTGAGACATGTAGAAGAGTATGAATTATCCTTTATATTAC  
AATTATGTAAAGTTCCATTAGAGCCAGAAGTATTAGCACAAATTAATGCTATGAATGCAG  
ACATTTTAGAAGATTGGCAATTAGGTTTTGTTCCTTCTCCTGACAATCCCATCAATGATA  
CATATAGATACATACATTTCAGCAGCCACACGGTGTCCAGATAAAACTACACCTAAAGAAA  
AAGCAGATCCCTTTGTCAGGTTATCACTTTTGGGATGTTGATTTGTCTGAAAAGTTATCAT  
TAGATTTAGATCAGTATTCTCTGGGACGTAAATTCCTTATTTCAAGCCAACCTGCAAAACA  
AAAGAGTTAACAGAGGGGTTACTGTAACCGGGAGGGCTACAACCTCAAGAGGTACAAAAC  
GAAAACGACGCTGACCGCTATCGGTTCTGGGGACCTTCAATAAACATATTTGGAACGTT  
>gi|37089393|gb|AY382778.1|\_Human\_papillomavirus\_type\_93,\_complete\_genome  
CACCAAGTATTGCACCTGGATGATTGTTGTTGGCAACAACCTTTATTACTCAACAAGTAT  
TTTCTTGCACCGATTTTCGTAGCACCTGTTTATAAGTATTGATATATGGTATATAAGGCAG  
ACATCTTAATGGCGGCAGTAAGTAAACCTCAGACCATTACAGAGCTTGCTAGGTGTCTTG  
GTATACCGTTAGAAGATGCTTTGGTGCCCTGTAATTTTTGTAAAAAGTTTTTAACATATT  
TGGAAGTCGTTGAATTTGATGTAAAACAACCTTTGTCTAATTTGGAAAGAAGATTTAGTGT  
TTGGCTGTTGCAGATGTTGTTGTATAGCATCAGCCACGTATGAATTTGATAATTACTTGA  
ATGATAGTGTGTTGGCTGGGCAATAGAAGTTAAGGAAAAAAGCCACTCTCTGAAATTA  
TAGTGAGGTGTGCGCATTTGTATGAAAAAATTAGATCAAATTTGAAAAGCTTGATATCTGTG  
GTAGATCTCTATTGTTTTACAAAGTGAGGAGGGGCTGGAAAGGACTCTGTAGGCAGTGTA  
AGTAGATATAATGATTGGAAGAGAGGTCACCTCTGCAAGACATTGTGTTAGGGTTGACACC  
ACCAGAGCCTGTTGCATTGAATTGTGAAGAGGAGTTACCAACCGAGCAGGATACGGAGGA  
GGAGCCTGCAAGAACAGCTTTCAAGATTATTGTGTTCTGCGGCGGAGGCTGTGGATCCCCG

ACTTCGAATATTTGTTGCTGCCACAGAATTTGGAGTTCGTTGCTTTCAGCAATTGCTAGT  
TAAGGAGTTGGATCTTCTGTGTCTTAAGTCCGAAACAGCGACCTGCAGCATGGCGGACA  
ATAAAGGTAGTGGTCTGAAGGGTTAAGTGATTGGTGTATTATTAGAAGCGGAATGTAGTG  
ATATTGAAAATGATTTGGAAACATTATATGAACAAAATGCAGATTCAGATGTTTCTGATT  
TATTAAATGATGATGAGGACTTGGAGCAGGGAAATTCAGAGAAGTATTTCAACAACAAG  
AGTTAGAAGACAGCGAGACTTTATTGCAATCATTAAGCGAAAGTATATTAGTCCCAGGG  
CTGTTTTACAATTAAGTCCTCAACTTGAATCTATTTTCGCTGTTCATCACAGCATAAAAGTA  
AAAGGAAAAGTGTGCTGAGCAGGACAGTGGAGTAGAGCTGAAGTTAAACAAATGAAGTTG  
AAGATATTGTTACACAGGTGGAACAAAAGGAGGAGGTACCGACAGCATCCACAACTTGA  
GGGAGGGGGAAAATGTACATTACAAGGAAGTATGAGATGTAGTAATTTGAAAGCTACAT  
TACTTGCAAAATTCAAAAGTGCTTTTGGTGTAGTTTTCAGAGTTGACGCGGCAGTATA  
AAAGTAATAAGACATGTTGTAACGATTGGGTGATTGCAATTTATGGTGTGAATAATGATT  
TGTTTGAAGGTTCCAAAAAATTGCTGCAACAGCACTGTGATTATATTTGGCTCACTGAAA  
TGTCTGCAATGTATTTATATTTATTATGTTTAAAGCTGGGAAGAATAGGCATACTGTGA  
TAAGATTATTAATCTCTATGCTACATGTTGCAGAGGAACAAATACTGTCTGAACCACCAA  
AGCTTAGAAGCACGTGTAGCAGCTTTGTTTTGGTATAAAGGCAGTTCCAAGTCCGGAACAT  
TTACCCATGGTTCATATCCTAAATGGATAGTAGAACAACATTAATAGGACATCAGTCTG  
GAGAAGCGGCAACATTTGATATGTCAACTATGGTACAATGGGCGTTTGATAATAATCTTA  
CAGAAGAGGCTGCATAGCTTTTCAATATGCTAAAGTACGACCTGATGATGTTAATGCAA  
CTGCCTGGTTGGCACATAATAATCAAGCTAGATTTGTTAGAGAAGTTGCTGCAATGGTCA  
GGTTTTTATAAAAAAGGACAAATGAGAGAAATGAGTATGTCTGCATGGATACATTTTAGAT  
TAGAGCAAGTAGAGGGAGAAGGACATTGGTCCCTCTATAGTAAAATTTATTAGATACCAAG  
GTATTAATTTTATAAGTTTTCTCTCTGCTTTGAAGGACTTTTTGTCATGCTAAACCAAAAA  
AAAATTGTTTGTCTTATATATGGACCGCCGAATACTGGCAAATCAGCATTCACAATGTCAT  
TAATTAAGTATTAATGGAAGAGTAATATCCTTTGTTAATTCTAAAAGTCATTTTTGGT  
TACAACCTATGCTGAGTGTAATAATTGCTTTATTAGATGATGCAACAGATCCATGTTGGG  
TTTATATGGATACATATTTAAGGAATGGTCTTGATGGACATTTAGTATCATTAGATTGTA  
AACATAGAGCACCAATGCAAATTAATTTCCCTCCACTTTTAATAACTTCTAATATTAATG  
CAATGGCTGAATCAGCATATAGATATTTACATAGTAGACTTGTAGCTTTTGAATTTCCCTA  
ATCCTTTTCCCTATGAAAGATGATGATACCCCTGAATTTGAGCTAACTGACCAAAGCTGGA  
AATCTTTTTTTTACAAGGCTTTGGACACAATTAGAAGTGAAGTGAACAAAGACGAGGGAG  
AGGATGGAGACTCTGAGAGAACGTTTCGATGTGTTACAAGATCAACTAATGAACATTTAT  
GAAGTTGCTAGTGATACCCTAGAAGCACAAATAGAAGTGGCGGCTTCTTCGTAAAGAA  
GCTGTGCTGTTATACCTTTGCTAGGCAAAATGGTGTTTTAAAGACTTGGGTATCAGCCAGTA  
CCACCACTTGCAACATCTGAAGCAAAAGCCAAAGAGGCAATTGGCATGATGTTACAGCTG  
CAGTCATTACAAAAGTCAGCCTATGCATCTGAAAAGTGGACTTTGGTGGATACCAGCATA  
GAGACCTTTAAAAATACTCCAGAAAATCATTTTAAAAAAGGACCTGTAAATGTGGAAGTG  
ATTTATGATGGTGACCTGACAATGCAAATTTGTATACAATGTGGAATATGTGTATTAT  
TTGGACTCTGAGGACAGATGGCAAAAAACTGAAAGTGGGGCAAATCATACAGGCATTTAT  
TATACTATAAAGGATTTCAAGCATTACTATACCTTTGTTTGCTGACGATGCAAAAAATAT  
GGTAAATCTGGCCAGTGGGAGGTGAGAAATTAATAAGGAACTGTGTTTGCTCCTGTTACT  
AGCTCCACGCCGCCAGAATCCCCAGGACGAGAAAGAGCTTCCCCAGAGTCCACCGCTCAC  
ACCAAGACCACCGCCGCTTCCAGCGCCTCCCCGACCACGAAGTCCCACAACAAACCAGT  
GACGAAACCAACCGAAAGCGGAGGTACGGAAGGCGAGAATCAAGTCCCACAGAGTCCAAA  
CGAAAGCGACGACGGTCTCGTCCAGGCAAAAGAAGCAAGGGCGAAGGTCGCGGTCCAGA  
ACAACATCCTCTCAATCTCGATCTCGGTGCGATCCTCTTCTCTAGAGGATCAAGGGGG  
TCACGGGGACGAACCCCCAGAGGGAGGGGAAAAACACACAACCCGGGGCAGGGGGAGAGGG  
AGTGGAAGGAAAGGTGACAGAAGGGGAAGGAGAAGTCAAGGTCATCCTCCTCTTCTCC  
CCCAGGATCTGCACAGATCAGCCTCACAAACCCGATCAAAACAATCCAAGTGTGCTAGG  
GACGGTGGCATATCTCCTGGGGACGTGGGAAGATCAGTTCAGACAGTTAGTGGACGAAAT  
ACAGGGAGACTTGAAGATTATTGGAAGAAGCTCGCGATCCCCAGTAATTTTAATTAGA  
GGGGAAGCAAAATACAGTAAAATGCTTTAGGAATCGGGCAAAACAAAAGTATAAAGGCTTA  
TGCAAGGCATTTAGCACAAACATGGTCATGGGTTGCCGCAGATGGCACAGAGCGTCTAGGC  
AGGTCCAGAGTGCTCGTAAGTTTTTACCAGCCATACACAGCGCAGCTCTTTTTTAAAGGTA  
GTTAAGTTTCCAAAAGGAGTAGATTGGTCTTTAGGCAACTTAGATAAACTATAATACTAA

CTTGCTTTTGCTACTAACATATAACCAAGCTTCTTTGTTTTGTATATTCTTGCAATGG  
TGCGTGCCAAAAGAACAAGAGAGATTCTGCAACTAATATTTACAGAACATGCAAGCAGG  
CGGGAACCTGTCCCAGTGTGTCATTAATAAAGTGGAAACAACAACCATGCTGACAATA  
TTTTAAGATATGGCAGTGTGGTGTGTTCTTTGGTGGCCTTGGAATCAGTACCGGCCGTG  
GTACAGGAGGTGCAACTGGATACGTCCCCCTTAAGTGAAGGGCCTGTAAGAGTGGGTAGTA  
CACCCACTGTAGTTAGGCCTGCTTTGGTTCCCTGAAGTTATTGGGCCTGCAGAAATTGCTAC  
CCGTAGATACCATAGCTCCTGTAGAACCATCCTCATCTTCAATTGTTCCATTAACAGAAA  
CTTCTGGTGTAGATTTATTACCAGGAGAAAATTGAATCTATTGCAGAAGTACATCCTGTAC  
CTGATGTTGCCAGTTTTGATACACCAGTTGTTACCACCAGTAAAGGTTCCAGTGCAATTT  
TAGAAGTTGCTCCCAGTCCAACCTCCTCTACACGTGTACGTGTAAGCAGAACACAATATC  
ATAATCCTTCTTTTCAAATTATGACAGAGTCTACACCTACACAAGGTGAAAAGTTCTCTAT  
CTGATCAAAATTTTGTGGCTTCTGGTTCTGGTGGACAGTCAGTAGGTAGAGCTGAAGAAA  
TCGAGTTGCAAGAATTCCTTAGTAGATATTCATTTGAAATAGAAACACCTACTCCACCAA  
GGAGAAGTAGCACTCCTTTACAAAGACTTAGACAAGCTGTAAGGGGCAGATCTTTAACAA  
ATAGACGGTTAATACAACAAGTAAATGTAGAAGATCCTTTGTTTTTATCACAGCCATCTA  
AATTGGTTAGATTTTCTTTTGATAATCCAGCATTTGAAGAAGAAGTGACACAGCAATTTG  
AGCAAGATTTAGATGATTTTATAGAACCACCAACAGAGATTTTCTTGATATTCAAACCTC  
TCAGTAGGCCTCAATATTCTGAAACTCCTGCAGGATATATTAGAGTAAGCAGATTGGGAA  
AAGAGCCACTATTTCGTACACGCTCGGGGGCCCAAATTGGGTACAGGTACACTTTTATA  
AAGATCTCAGTTCCATTGATACCTGAAGACCTATTGAATTAGATTTACTGGGACAACGTT  
CTGGTGTAGCCACTATAGTTCAAGGGACTGTAGAAAGCACATTTATAGATGTCAATGTTG  
ATGACAATCCTTTATCAGAGTTGGAATCATACCCTGAGGCACATACAGAGGATGCATTAT  
TAGATGAAGCAGTAGAAGATTTAGTGGTTCTCAATTGGTAATTGGCAATAGAAGATCTA  
CCTCTACTTACACAGTACCTCGCTTTGAAAACCCCAAGAAATGCTACATATTACACACAAG  
ACTTAAAAGGTTATTATGTATCATATCCAGAATCTAGAGATGATTTGCAAATTATTTATC  
CCTCTCCAGATCTCCCAGCAGTTGTAATTCATACATATGATAATAGTGGGGATTTTTATT  
TACACCCAAGTTTACTACGGAGACGCAGACGCAAACGTAAATATTTGTGATTTTTACAGA  
TGTCGGTGTGGTTACCTGCCAGTGGTAAGGTATATTTGCCACCTTCAACACCAGTTGCCA  
GAGTACAAAGCACGGATGAATATGTACAAAGGACCAATATTTTCTATCATGCATATAGTG  
ACAGATTATTAACAGTAGGTACCCATATTACAATGTTTACAATAATAATGGAACAGTAT  
TGGAAGTACCAAAGGTTTCAGGTAATCAGCACAGGGTGTTTAGATTGAAATTACCAGACC  
CAAATAGGTTTGCATTAGCTGATATGTCTGTTTATAACCCGGAAAAGGAAAGGTTAGTTT  
GGGCCTGTAGAGGCTTGGAATAGGGCGGGGCCAACCTTTAGGTGTTGGTACTACTGGGC  
ATCCATTATTTAATAAGGTAAATGATACAGAAAATCCTTTAAATTACAGAACTCAGGCAT  
TTTCTACTGATGATAGACAAAACCTATCATTTGATCCAAAACAAATACAAATGTTTCATAA  
TAGGTTGCACACCATGTGTAGGTGAACACTGGGATGTTGCACCTAAATGTGATGGAGCCA  
ATGACCAAAATGGGATTTGCCACCTATACAATTAGTAAACACTGTTATTCAAGATGGGG  
ATATGGCAGATATCGGGTATGGTAATCTTAATTTTAAGGCTTTGCAGGAAAATAGATCTG  
ATGTTAGTCTTGACATTGTTAATGAAACCTGCGAATATCCTGATTTTTTAAAGATGCAAA  
ATGATGTTTATGGGGATTCTTGCTTTTTTTTTTGCTCGCAGAGAGCAATGTTATGCCAGAC  
ACTTTTTTTGTAAGAGGTGGCAACGTAGGAGATGACATTCCTGGTGAACAAAATAGACGCAG  
GCACATATAAAAATGATTTTTTACATTCCAGGAGCAACAGGTGAGACACAAAATAAAATAG  
GTAATCCATGTATTTCCCAACAGTTAGTGGCTCATTAGTGTCTAGTGATGCTCAGTTGT  
TTAATAGGCCCTTCTGGCTCCAACGCGCACAAAGTGCATAATAATGGTATTTGTTGGGCAA  
ACCAATTGTTTATTACAGTTGTAGACAACACAAGAAACACAACTTCAGTATTAGTGTTT  
ATACAGACCTTGGGAAAATAAGGGATATAAATGATTATGATGCTAACAAATTTAGAGAAT  
ATCAAAGACATGTGGAAGAATATGAAATTTCCCTTGATATTACAATTATGTAAAATACCTT  
TAAAATCAGAAGTACTGGCTCAAATAAATGCAATGAACCCCTCACTGCTAGAGGAATGGC  
AATTAGGGTTTGTCCCAACTCCAGACAATCCGTTACAGAGTACTTATCGATATATTAATA  
GTTTAGGCTACACCATGTCCCGATAAGGTTCCACCAAAGGAAAAGGAAGATCCTTATGCAC  
CGTTATACATTTTGGAAATGTAGATTTAACTGAAAGATTATCATTAGATCTAGATCAATACT  
CCTTAGGGCGCAAATTTCTGTATCAGGCAAATCTTGTACAATCACCAGCTAAACGGTCAT  
CATCTATTTCTCGAGGAACTAAAAGAAAAAGAAGCAAATAATTTTACCCTTTTGGTACA  
ATAAAGAGTATATCAAACAGTATTCCAAGAATGCTTGTATTATCATATGTCTGACTAATTTG  
AACTTTGGCTAGAATGTGAACCGCGCCCGATACAGATAGATAACATCTTGCAACCACAGC

AGAGACAATGAGAACCTTGTAGGTTCCAACACGCTCGGATTTGGCGCATCCTACCACATT  
TGGCGCCTTTTCTGCTGGCAAGAAAACCTGCACCGTTAACGGTAAGTTTTTGTATTATGTA  
CCAGGCAAGA

>gi|27531786|ref|NC\_004500.1|\_Human\_papillomavirus\_type\_92,\_complete\_genome

TATTGTTGCCAACAAATCATCACGCCATAGAAAAACACGTAACCGCCTGCGTTATAATACA  
AACAGCTAGTATATAAATACAGGCAGTGAAAGTGTTCCCATCACAATGGCAAAACCTCCT  
TCGGTGCAGGAACCTAGAAGACAGTTAGATATTCATTGGAGGACATTTTATTGCATTGT  
AATTTTTGTGAGGCTTTTTTAACATTTGAGGAGCTACTGCAATTTGATGCAAAAAATTTA  
AATTTAATTTGGAAGGAGAATTATGCTTATGCTTGCTGTGGTGCTTGTGCTAAACAAGTA  
GCAGCAATAGAAACAAAACATTTTTATGAGTATAGTGTACAAGGAAAGGATGCTATAGAA  
AGGGACTCAGGTAGTCTTTTGTGTTGTTTAACTGTTAGATGTAAGTTTTGTTTAAGACAT  
TTGGATTACTTAGAGAAATTGGCAGTTTGTGCATCAGGCATTCCTTTTGATAGAGTTAGA  
GGAGCTTGGAAGGCAGTGTGTAGGTTTTGTACAGAGATATGATTGGGAAACAGGCTACTA  
TACCAGATATTGTGCTGGATCTGCAAGACCTTGTCAGCCCATTGACCTGCATTGTGACG  
AAGACTTGTCAAGAAATCAGGAGGAGGAGCCTGCACCTCAAAGAATAGACTACAAGATAG  
TTTCCTCGTGTGGTGGCTGCGGAATTAAGCTTCGAATTTTTGCATCGTGTACCCAATTTG  
GAATTAGAACTCTGCAAGACCTACTTCTTGAAGAAATAGCGTTGCTGTGTCCTGACTGCA  
AAAATGGCAGATAAAGGTATAGATCCTAAAGAAGGCTGTAGTACTTGGTGTTAATAGAA  
GCTGATTGTAGTGTAGATGGGGATTTTGAAGTTATTTGACAAAGACACAGACTCA  
GATATTTTCAGATTTATTATGATGATGGGGACCTTGGGGACGCAGAATTGGGAAATCCCCAA  
GAGCTGCTGTGCCTGCAGGAGAGAGAGGAGCGATCTACAGCTGCAGCAGTTAAAACGA  
AAGTATTTTAGTCCTAAAGCTGTTTTACAGCTTAGTCCACAATTGGAATCTATTACTATT  
TCGCCTCAACGCAAAAGTAAGAGGCGACTGTTGAGGAACAGGACAGCGGACTTGAGCTT  
TCTTTAACTCATGAAGCTGAAGATTCTGTTGCGGAAGTGAGGTACCGGGGTCAAAGAT  
GACGTCCAGAACTGTTTCTGCTACAGCAGAACTAAGGGAAGCCAAAACAAAGACAT  
TACAAACAGTTACTACAGTGCAGCAATGCGCGGGCTACATTGCTTAGTAAATTTAAAGCT  
GCTTTTGGTGTTAGCTTTACAGAGTTAACCAGAAGATACAAAAGTGATAATACATGTTGC  
AGAGACTGGGCAATTATTGTCTATGGGTGCAGGATGAAATTATTGAAGGCTCAAAGCAT  
TTATTTTCAGCAGCATTTGTGAATATATTTGGTTGCATGTTTTATCTCCAATATCTTTGTAT  
TTACTATGTTTTAAACTGGAAAAAGCAGAAATACTGTAAAGAACTTGTTGATGTCCATT  
TTAAATGTTGGGGATGCACAGCTTATAGCTGATCCACCCAGATTGCGAGCGTAGTAGCA  
GCTTTGTTTTGGTACAAAGAATCTATGAATAAAAATGTATATACCCATGGAGAATACCCA  
GAGTGGATAGCAAATCAAACATTGCTTCTCATCAGGAATATGAAACACAGCAATTTGAT  
TTAAGTAGAATGATTCACTGAGGATATGATAATGAATATACTGAGGACTCAGATATTGCT  
TATCATTATGCAAAATTAGCAGATGAAGATTCAAATGCTCGCGCCTTTTTAGCTCATAAC  
AGTCAGGCAAAATTTGTTAGAGAATGTGGACAGATGGTAAGGCATTATAAAAGAGGAGAA  
ATGAAAAATATGAGTATGTCAGCCTGGATTTTACTAGATTGAAATCAATTGAAGGACCA  
GGCCATTGGTCAGACATTGTTAAATTTATACGATTTTACGAGATTAATTTTATAATGTTT  
CTAGATGTATTCAAGCAATTTCTTGCTCAGTACCTAAAAGAAATTGTTTATTAATTTAT  
GGTGCACCTGATTGTGGCAAATCAATGTTTTGTATGTCTTTAATAAAGGCCTTAAAGGGA  
AAAGTTATATCGTTTGTAAATGCTAGAAGTCAATTTTGGTTATCTCCATTAGTAGAATCT  
AAAATTGCACTACTAGATGATGCCACCGAGTGCTGTTGGAATTATATTGATAATTATTTA  
AGAAATGGAATAGATGGTAACATGGTTAGTGTGGATTGTAAGCATAAAAATCCGGTCCAA  
ATTAGATTTCCACCATTATTGATTACATCAAATAATAATATAATGTCTGATCCAAAGTAT  
AAATATCTGCATAGTAGAATTAAAGCATTGTGAGTTTGTAAATAAGTTTCCATTTAAGGAC  
GATGGCAGTCCCTTGTTTGAACCTACTGACCAAAGCTGGAAATCTTTTTTTCAAAGGCTT  
TGGAGGCAATTAGATCTAAGTGACCAAGAAGACGAGGGTGAGGATGGAGGCTCTCAGCGA  
CCGTTTCAATGCATGCAAGACAAGTTAATGACAATTTATGAAAGAGCTAGTGAATCCTT  
AAAAGATCAAAATTGAACATTGGAACCTGTTAAGACAGGAGCAGGTGTTATTTTATTATGC  
CAGACAAAGAGGAGTATTGCGCCTTGTTTATCAGCCAGTACCTGCATTAACTATTTTCA  
GGCTAAAGCTAAGGAAGCCATTGCTATGGTTTTACATTTAGAAGCATTGCAAAGATCACC  
TTACAAAAATGAAAAATGGACATTAGTAAATACAAGTGTAGAAACGTTTCGCACACCCCC  
AGAAAAATTGTTTTAAAAAGGGCCCTAAGACTATTGAAATAGTGTATGATGGCAATCCTGA  
AAATACAATGTTATACACTATTTGGACACATATATATTTTGAAGATGACGAAGGCAACTG  
GCAAAAGACTGAGGGACATTTGGACTATCATGGTGCCTATTTTATGGATGGATTAAATAA

ACAATACTATATCAGATTTGCTCAAGACGCACGCAGATTTAGTGAAACTGGAGAATGGGA  
AGTTAAGTTTAACAACGAAATTTTGTTCCTGTTACCAGCTCCACCAACTCCGAAGA  
AGAAAGGGACCGACCCGCCCTGCCACAGACCCCGGCTCCCTTTCGCAGACATCCGGAGG  
ACAGTCCCCCTGTACCCACTCAACGGAAGCAACCATCTAAAGGAAGGTACGGGCGAAAAGA  
CTCTGGTGCTACAACCGCCTCCAGGGGGATCCAAAGACGACCGAAAGCGTCACCGAGGAG  
ATCACGATCGCGGT CAGGATCGAGATCGGGATCACAAGGAGACGCGCGGACCCCTCCTCAC  
AGTCAGACGCGGAGAACGGGAACGGGGACAAGGAAGGGGACAAGGAAGCCGGGTTCGGGG  
AAGGAGCGGGGACAGAAGCAGGAGCGGGAGCAGAAGCAGGAGCGGGAGCAGGAGAAGGAG  
CAGGAGCAGGGGCAGGAGCAGGAACGGGAAGGGAACGGGGGAGAGCAGCCTCCAGAGGCCG  
TAGAGGGTACAGCAACAGGAGGTCAAGATCCAAATCTGTTGGCACAAGTGGCATACCACC  
TGAGCAAGTGGGAAGCAGCCTACAAGGTGTTGGTAGACAACATAGTGGACGACTTGCGAG  
ATTATTGGACGACGCTAGGGATCCCCAGTAATTTTGTGAAAGGACAAGCCAATACTCT  
TAAGTGTTATCGCTACAGGGCTAAAGAAAAGTATAAAGGCTATTATGATTGCTTCAGTAC  
TACATGGTCATGGGT CAGTGCAGGTAGCAACGATAGAATAGGACGCTCTAGAATGATTAT  
TAGCTTTACCAGTAAATCTCAAAGACAAATGTTTTTAAGTATTATGAAATTACCAAAGGG  
CGTTGATTGGTCTCTTGGGTGCTTTGACTCTATTTAACACACTAACCTTTCTAGTTTTTT  
TACTAACACATACGTTTCAATAGAATTGTTAATGCATGGCTCGCGCACGCAGAACAAAGC  
GTGATTCTGTTACTAATATTTACAGGACCTGCAAAGCAGCAGGCACCTGCCCCCTGATG  
TTGTTAATAAAGTGGAGCACTACTGTAGCTGATCAAATTTTAAAATATGGCAGCACTG  
GTGTATTTTGGAGGTTTGGGAATTGGTACAGGAAGAGGCACCTGGTGCTAGCACTGGAT  
ATGGGCCATTAGGTGAAGGGACGAGTGTAAGAGTTGGAAATACACCCACAGTTATTAGGC  
CTGCTTTGGTGCCTGAGGCTATAGGACCAAGTGAACATACTATTGACAGTGTCATC  
CTATTGACCCCAAGTGCTTCTTCTATCATACCTTTAACAGAGTCAACAGGTCCTGACCTCT  
TACCAGGTGAAATAGAAACAATTGCAGAGGTGCATCCTGCCCCTGACATACCTACAGTAG  
ATACACCAGTGGTGACTGGGGGCAGAAACTCGAATGCTGTTCTGGAGGTGGCTGATCCAA  
GTCCACCCACACGAAACAGAGTTAGTAGAACACAATATAACAATCCTGCATTTCAAATCA  
TATCTGAAACTACACCAAGTGCGGGGGGAAACGTCCTTATCAGACCAAATGTTGTTTCAGT  
CATTTGATGGTGGACAATATATAGGTGGTAACCCACCTCCGCGATCAGTAGTTGAAATAG  
AATTACAAGAAATTCCTCACAATATTCTTTTGAATCGAAGAGCCAACCCACCTAGGC  
AAACAAGCACTCCTGTCAGACAGGCACAACAAATGGCCTCAGCATTACGGAGGGCTTTAT  
ACAATAGAAGGTTACACACAGCAGGTTCAAGTGGAAGATCCAATGTTTTATAGTAGACCTT  
CCAGGTTAGTTAGGTTTCAATTTGATAATCCTGTATTTGAAGAAGAAGTACTCAGGTGT  
TTGAAAGAGACCTAGAACTATAGAAGAGCCTCCTGATAGACAATTTTATAGATGTACAAA  
AACTTGGTAGGCCTACCTATGCTGAAACACCTGCAGGCTATATAAGGGTTAGCAGACTTG  
GCAAACGAGCTACTATAAGGACCAGGTCTGGAACATAAATAGGCGGT CAGGTACATTTTT  
TTAGGGATATTAGCAGTATTGATACTCAACCTTCTATTGAACTGCAAGTTCTTGGGGAAC  
ATTCTGGCGATGCTACAATAGTCCAGGGTCCTGTGGAAAGTACGTTTCGTAAATATTGATT  
TGGAAGAGTTACCTAATTTAGAGGAAAAATGTACACCTAGAATCTGATGATATACTTATTG  
ATGAAGCTATAGAGGATTTTAGTGTTGCCCAATTAGTGTTTGGAAATTCTAGAAGATCAA  
ATACTGTTACATTACCTCGCTTTGAAACTGTAAGGGAACTTCTTTATATACTGTAGATT  
TAGATGGATTCCATGTGTCTTATCCTGAGAGTAGAGCGTATCCAGAAGTTATTCCTACAG  
AACCAGATAATACCCCAACAGTAATAATTCACACAGAAGATTTTAGTGGTGATTATTATC  
TACATCCTAGCTTAAAATGGAAGAAACGAAAACGGGCCTATTTATAATTTTTTGCAGATG  
TCCTATTGGCTTCAGCAAATGGTAAGGTATACTTACCCCTTCAACACCGGTTGCAAGG  
GTACAAAGTACGGATGAATTTGTTCAAAGGACCAACATCTTTTATCATGCAAATAGTGAT  
CGCCTGCTGACAGTTGGACACCCCTTATTTTGAAGTGAGAAGCTCAGTTGATCCACATGAT  
GTATTAGTGCCTAAGGTGTCAGGGAATCAGTTTAGAGCTTTTCGACTGAAATTACCAGAT  
CCTAATAGATTTGCTTTAGCTGACATGTCTGTTTATAATCCAGACAAGGAAAGGCTTGTT  
TGGGGCTGCAGGGGATTGGAAATAGGGCGAGGCCTTTAGGTGTTGGCACCACAGGT  
CATCCATTATTTAATAAGGTATTGGACACTGAAAATCCAAATAAGTACAATACTGGAACA  
AAGGATGACAGAGTAACACATCTTTTGATCCAAAGCAAATTCAGTTATTGTTTTAGGA  
TGTAACCATATGCTTAGGTGAACATTGGGACACAGCCTTACCATGTGCTGAAAAGCAACCA  
GATACTGGGGGATGCCACCATTAGAGTTAAAAAACACTGTTATCTCTGATGGAGATATG  
GTTGACATAGGCTTCGGTAATATGAATTTTAAGGCCTTATCAGTAACCAAATCTGACGTA  
AGTTTGGATATAGTAGACTCCACATGTAAATATCCAGACTTTTTTAAAGATGTCAAATGAT



GTATATGGCAACTCATGTTTTTCTATGGACGACGAGAACAATGTTATGTTAGGCATATG  
TTTGTGCGCGGTGGTGTGTGGGTGATACCATCCCAGATGCAGTTGTAAATGAAGACCAT  
AACTTTATGTTACCTGCAGCATCCAGTGACCAGTCTAGAAGTCAAATTGCCAGTTCTATC  
TATTTCCCTACTGTTAGTGGGTCTTTGGTATCCACTGATGCACAATTATTTAATCGGCCA  
TATTGGTTACAAAGAGCACAAGGCCACAACAATGGTATTTGCTGGAGTAATGAACGTGTTT  
CTGACAGTTTGTGATAATACCAGGAATACTAACTTTAATATTAGTGTCCCTAAGGAAGGT  
GGTCAAATAACCGACTATGATTCACAAAAGATTAGAGAATACACTAGACATGTTGAAGAA  
TATGAAATATCACTAATATTACAATTATGTAAAATTCCTTTGGAAGCTGAGATATTAGCT  
CAAATTAATGCAATGAATCCAAATATTTTGGAGGACTGGCAGTTAGGATTTGTTCCCTACT  
CCAGATAACCCATTTCAGGATGCATACAGATTTATTTCATTCTAAAGCAACACCTTGTCCA  
GATAAAGCACAACCTAAAGAAAGAGAAGATCCATGGGCCCCATATACATTTTGGGTGTGA  
GACTTAACTGAAAAATTATCTTTAGATTTAGATCAATATTCATTGGGTAGAAAATTTTAA  
TTTCAAGCTGGATTAACTAATACATCTGTTAATGGTCTTAAAGAACTAGAAGCAGTTCT  
CAAAGAGGTACTAAACGAAAAAGAAAAAGTAACATAAACGGTCAGTATCTTTATTGAAA  
ATAAAATTTTGGAACTCATGTGTTATGAGTAATGATTATTATCTATTCTGACTAACTCA  
AACATGTTAACCGCGCCCGGTGTATTCAATATAAACGCTGATGGTACAAGTTGTCAAGGA  
ACTTGGCAGTCTGAACTACAGTGGTGCCAACACCTGGAAGGCACACAAGATTTGCGCGCC  
AAAACACTTGGCAGAACATTTACCCGATAACGGTAAGATTTTATCTTTAACCGGGTGCG  
GTCGTTGGGTTACTGTTTAGG

>gi|9627363|ref|NC\_001591.1|\_Human\_papillomavirus\_type\_49,\_complete\_genome

CCACATTGTTCCAGCTACATTTTGGCGCCAACCTTTTGGCAGCAACACCAGAACGATAA  
CGGTAAGTTTCAATCGGGCGCGGTACATTATACCTTAGTCATCTCTTGTGGTTGTTAACA  
ACAATCTTGAAACAGATATACATGTAAACCGCTTGCGTGCTGTACTTTCTTTATTCTTGGA  
AAGAATACAGACAGGACACATGGCTAGACCTGTTAAGGTATGTGAGCTAGCCCACCACTT  
AAATATACCTATTTTGGGAAGTTTGTCTTCTGTAATTTTGCACGGGGTTTCTAACATA  
TCAGGAGTTGTTAGAATTTGACTATAAAAGACTTTAATTTGCTGTGAAAAGACGGATTTGT  
CTTTGGTTGTTGTGCAGCTTGTGCCTATAGATCAGCATATCACGAGTTTACTAATTATCA  
CCAAGAAATTGTCGTAGGCATCGAAATAGAAGGACGAGCAGCGGCTAATATTGCTGAGAT  
AGTAGTCAGATGTCTCATTTGCCTTAAGAGGCTAGATTTGTTGAAAAGCTTGATATTTG  
TGCACAGCACAGAGAGTTTCACAGAGTTAGAAATAGGTGGAAGGGGTGTGTAGACATTG  
CAGAGTTATAGAATGATTGGGAAAGAAGTTACAATACCAGATATAATACTACAAGAAGAG  
TTTGGCCAGCCATTGACCTGCAATGCTACGAGAATCTAACAGCTGAAGCGCCAGCTGAA  
CAAGAGTTGGAGGCAGAGGAGGAGCTTATCCAAGGCATCCCTTACAAAGTTATTGCTACT  
TGTGGCGGCGGATGCGGTGCCAGACTGCGAGTCTTCGTGTTAGCCACTGACGCTGCTATT  
AGAAGTTTCCAAGAACTGCTTCTGGAGGAACTGCAATTCTTGTGTCTCAGTGTCTGTGAA  
GAAATTCGGAATGGCGGACGATAAAGGTACTGATCCCAAAGAAGGGTGTAGCGAGTGGTT  
TATAGATAATGAAGCAGACTGTAGTGATTTAGAAAATGATTTGGAACAATTATTTGATGA  
AAGCCCCAAAGTCCAATATTTCAAATTTGTTAAATGATGAGGAGGATGTGGAGCAGGGAAA  
TTTCGCGAGATCTGCTTCGCCAGCAGGAATTTGAGGAGAGCGCGGAGCAAGTACAAAAGTT  
AAAACGAAAAGTATTTTCAGTCTTAAAGCAGTTCAACAACCTTAGCCACGGTTGCAGTCTAT  
GTCAATATCTCCGCGACAAAAGTCTAAACGAAGGCTATTTGAGGAGGACAGCGGGCTGGA  
ATTATCGGGGCTCGAACAGTCTTTGACTAATGAAATTGAAGATACTCCTGCGGAGCTGGA  
GGTACCGGCGGCAACGCCGCGCAGAGCAGGGTGGTCAGGGAGAGGGCAATTTGCATTATAA  
AGAGTTAATGCGATGCAATAATAGTCGTGCAAAATTATTAAGTAAAGTCAAGGAATATTT  
TGGTGTGGGTTTTTATGAGTTAGCTAGACAGTATAAAAGTGATAAAACATGCTGTAAAGA  
TTGGGTAAATGCGACCTATGGCGTGCGAGAAGAGCTGGTAGAAAAGTGCAAAACAATTACT  
TTTAAATCATTTGTTCCCTATGTGTGGATAAAATATAAATGGGATTATGACTTTATATTTACT  
GTGTTTTAATCATGCAAAGAGTAGAGAACTGTTGGTAGATTGCTTATGTCAATACTGGA  
TGTACAATTATTGCAATTAAATTTGTGAACCACCAAACTAAGAAGTGTTGGTGTCTAGCACT  
ATACTGGTACAAAGGCAGTATGGACTCATCTGTGTATGCTCATGGAGCCTATCCTGATTG  
GATTGTAAATCAGACCATGATAAGTCATCGGTCAGCAGCAGATGCTATGCAATTTGACCT  
TTCTGAAATGATACAATGGGCCTATGATAGCGATCTCACAGATGAAGCTGACATTGCATA  
TCTTTATGCTAAAATGGCAAATAGTGACTCTAATGCAAGAGCTTGGTTAGCACATAATAA  
TCAGGCAAGGTACTTAAAGAGAATGTGCTCAAATGGTTAGACATTACAGACGGGGAGAAAT  
GAGGGATATGAGTATGTCTGAGTGGATACATCACAGAATACAACAAGTAGAAGGGGAAGG

CCATTGGTCTGAAATAGTTAAGTTTATAAGATTTCAAGAAATAAACTTTATAATATTTCT  
GGATGCATTTAAACAGTTTATACATGGCAAACCTAAAAAAGCTGTTTATTAATACATGG  
GCCGCCGGACTGTGGCAAGTCAATGTTTGCTATGTCATTATTAAAAGTTTAAAAGGCAA  
GGTAATTTCAATTTGTAAATGCAAAAAGTCAATTTTGGCTGTCTCCACTTTCAGAATGTAA  
AATAGGGCTGTTGGATGATGCTACCGATCCTTGTTGGCAATATATAGATACATATTTAAG  
AAATGGTCTCGATGGAAATGTTGTAAGTGTGGATTGCAAACATAAAACCCCTATGCAAAT  
TAGGTTCCCACCATTGTTAATAACTTCAAATTATAATATTAAAGCTAATGATAAATATAA  
GTTTTTGTACAGTAGAATTGCAATATTTGAATTTAAACATAAGTTCCCATTCAAAGAGGA  
TGGTACCCCTGTATTTCAACTTACTGACCAAAGCTGGAAATCTTTTTTTGAAAGGCTTTG  
GACACAATTAGAGCTCAGTGACCCAGAAGACGAGGCAGACAATGGAGGCACTCAACGCTC  
GTTTCAATGTACTACAAGAGATGTTAATGGACATTTATGAATCAGGGAAAAGAGGATCTTG  
AAACACAAAATAGAACATTGGAAGCTGTTAAGACAGGAACAAGCTTTATTATTTTTTGCAC  
GTAAACACAGCATAATGAGACTGGGGTATCAACCCGTACCTCCGATGGCAGTATCTGAAA  
CCAAAGCCAAAACAGCTATTGGCATGATGCTAACTTTGCAAAGCTTGCAAAGTCTCCTT  
TTGGAAGAAAAGTGGACTTTAGTAAACACAAGTCTTGAAACATACAATGCACCACCAG  
CACAGTGCTTTAAAAAAGGTCTTTATAATATAGAAGTTATATTTGATGGAGATCCTGAAA  
ATCTAATGGTATATACTGCTTGGAAGAGATTTATTTTGTAGACTCAGATGATATGTGGC  
AAAAGGTGCAAGGTGAGGTGGATTATGCAGGTGCATATTATAAGGATGGAACATATCAAAC  
AGTATTATGTTACCTTCGCTGATGATGCTGTTAGATATGGGACATCTGGACAATATGAAG  
TCCGCATTAAACAAGAACTGTGTTGCTCCTGTTACTAGCTCCACCCACCATCCACGG  
GGCTACGAGAATCCTCCAACGCCAGCCCCGTTACGACACCGTCGACGAGACACCCACCA  
GCACCACAGCAACCACCACCACCTTCAGCACACCACAGCCACAGCCACAGCCACAGGAG  
CACCTGAACTCTCATCCAAAACCGGTACCAGGAAAGGAAGGTACGGGCGAAAAGACTCTA  
GTCCTACAGCAGCCTCCAACCTCAGGAAAAGAGGTCTCGCGACGACGATCCAGGTCTAGAA  
CCAGGACCCCGCAGACGGGAAGCGAGCACCTCAAGGTCCCAAAAAGCCAGCCGTTCCAGAT  
CCAGATCCAGATCCACTTCCAGAGGATCCAGAGGGTCCGGAGGATCTGTCACAACCTCCA  
GAGATTCCAGCCCCAAGAGAACCCGCAGGGGCAGAGGGAGGGGAGGGAGAAGTAGAAGGT  
CACCCACCCCCACCTCCACCAGTAAACGGGAAAGAAGGCGCAGCCGGTCAAGGGGGGAG  
AGCCTGTTTCTGGAGGGGTGGCATCTCGCCTGACAAGGTGGGATCAAGAGTACAAACAG  
TTAGTGGACGACATCTTGACGACTTGGAAGGTTACTGGAGGAGGCTAGCGATCCTCCAG  
TAATACTTTTGCGAGGAGACCCAAATATTTTAAATGTTACAGATACAGAGATAAGAAGC  
GTAAATTAGGTTTAGTAAAACATTATAGTACCACCTGGTCATGGGTGGTGTAGATGGCA  
ATGAAAGAATAGGTAGATCACGTATGCTTTTAAAGTTTTACTTCAAACAGCACTAGATCAC  
AGTATGTTAAAATTATGAAGCTCCCTAAAGGTGTGGAATGGTCTTTTGGTAATTTTGATA  
AGCTTTAACATTTTGCTAACATACTAACGGTGCTTGCACTACTAACACATTAATCTTTTA  
ACATTTTTTATATTGCTTTTTTTATTTTTTATATAATGGTGCGTGCTCGCAGAACAAAGCGAG  
ATTCTGTAACAAACATTTACAGAACCTGCAAACAGGCAGGAACTGTCTCCGGATGTTG  
TTAATAAAAGTGGAACAAACTACAATTGCTGACCAAATATTAAAATTTGGCAGCACTGGTG  
TGTTTTTTGGTGGTTTGGGAATAGGTACAGGCCGTGGTACCGGTGGCAGTACTGGCTATG  
TACCTATAGGTGAAGGCCAGCAATACGTGTTGGGGGCACTCCAAGTGTTGTTGTTCCAG  
GTATACTCCCTGAGGCTATTGGTCCGGCGGATATCATTCCTATTGATACTGTCAATCCAA  
TTGATCCAAATGCATCATCTGTGGTCCCACTCACTGACACAGGACCTGATTTGCTACCTG  
GGACAATTGAGACTATTGCAGAAGTGAACCTTGCCCCAGATATTCTTAGAGTTGACACAT  
CTGTTGTCAACAAGCAGAGGCTCCAGTGCTGTATTGGAGGTTGCCTCTGAACCCACAC  
CACCCACTCGCACCAGAATTTCCAGAACACAGTACCATAATCCCTCTTTTCAAATATTAA  
CTGAATCTACACCTCTTTGGGAGAATCTGCATTAAGTATGATCATGTTGTTGTTACTAGTG  
GTTCTGGTGGTCAACCAATAGGTGGAGTTACACCAGTTGAAATAGAATTACAAGAATTTC  
CTAGCAGATATACTTTTGAATAGAGGAACCTACACCACCAAGACGCTCTAGTACCCAC  
TACGCAACATCACACAAGCTGTAGGAAATTTAAGAAGATCACTATATAATAGGCGACTTA  
CTCAACAAGTAAATGTCCAGGATCCATTATTTTACAACAGCCCTCACGTTTAGTTTCGCT  
TTGCCTTTGATAATCCTGTGTTTGAAGAAGGTTACACAAATATTTGAAAGGGACGTAG  
CAGCTGTAGAAGAACCTCCAGACAGAGACTTTTTTAGATATAGCAAAATTAAGCCGCCCTC  
TTTACTCTGAAACACCACAGGGATATGTCAGGGTAAGCCGCTTAGGTAATAGGGCTTCTA  
TTAGAACACGTAGTGGAGCTACAGTAGGGGCTCAAGTGCATTTTTTATACAGATCTTAGCA  
CAATCGATGCAGAGGAGTCTATAGAGTTATCACTATTAGGGGAACATTCTGGTGATGCTA

CTATTGTCCAAGGCCAGTAGAAAGCTCATTTGTAGATTTAAATGTTTCAGGAACTGCCTC  
AAGTAATAGAAGTAGACCCAGAACCTACTTCCACTCTGATGATTTGCTACTGGATGAGC  
AAAATGAAGATTTTTCTGGCTCCCAGTTAGTTTATGGTAGTGGCAGGCGTTCTACCACAT  
TACTGTACCCCGCTTCTCTACTCCCAGATCTGATACCTTTTATGTACAAGATTTGGAAG  
GTTATGCTGTGTCATATCCTGAACGAAGGAATTATCCAGAAATTATTTATCCTCAACCCG  
ATTTGCCAACTGTAATAATTCATACTGCAGATACCTCTGGGGACTTCTATTTACATCCAA  
GCCTTCGCAGGCGAAAACGTAAACGCACCTATTTATGATATTTCTTTTCAGATGACCTCGC  
TATGGTTACCTGCAACTGGTAAGGTATATCTACCACCTTCAACACCTGTGGCAAGGGTAC  
AAAGCACGGATGAATACATTCAGAGGACAGACATCTACTATCATGCTAATAGTGATCGAT  
TGTTAACTGTAGGACATCCATATTTTGATGTGAGAGATACAGCAGACAATTCTAAAATTT  
TAGTACCAAAGGTTTCAGGTAATCAATATCGAGCCTTTAGATTACTATTACCAGATCCCA  
ACAGATTTGCACTAGTAGATATGAATATATATAACCCAGAAAAGGAAAAGATTAGTATGGG  
CCTGTAGAGGCTTAGAAATTGGTCGTGGCCAGCCTTTAGGTGTTGGTACAACAGGACATC  
CATTGTTTAACAAAGTCAAAGATACTGAAAATGCTAATAACTATATAGTAACCTTCTAAAG  
ATGATAGACAGGATACTTCATTTGACCCTAAACAGGTACAAATGTTTATCATAGGTTGTA  
CTCCTTGTATGGGTGAGTACTGGGACGCTGCTAAACCTTGTGATGCAGATGCTGGTCAGG  
GTAAATGCCCTCCATTAGAATTAATCAATTCAGTTATACAAGATGGTGATATGATTGATA  
TAGGTTTTGGTAATATCAATAATAAGACATTATCTGTTAACAGATCTGATGTCAGTTTGG  
ATATAGTAAATGACATTTGCAAGTATCCTGATTTTTTAAAGATGGCAAATGACATATATG  
GGGATGCTTGTCTTCTATGTCTAGACGTGAACAATGTTATGCCAGGCACTTCTTTGTTA  
GAGGTGGTAATGTAGGGGATGCGATACCCAACTGCTGTAGGTCAGGATAACAATTACA  
TATTACCTGCAGCAAGTCAACAGGCCCAAAATACTCTTGGCAGCTCCATCTATTTCCCTA  
CCGTCACTGGCTCTTTGGTATCTACTGATGCGCAGCTATTCAATAGACCTTTTTTGGTTAC  
AAAGAGCACAGGGTCACAACAATGGAATTTGCTGGGAGAATCAGCTTTTTTATAACAGTGG  
CTGATAATACCAGAAATACCAATTTTACTATTAGTGTAAGTACGGATGGCCAGACACCTA  
CAGAATATGACAGTACCAAGGTTAGAGAATTTTTAAGACATGTAGAGGAATATGAAATTT  
CAATTATATTACAATTGTGTAAGGTACCTTTAGAACCGGAAGTCTGGCACAAATCAATG  
CTATGAATCTTCTATATTGGAATTTGGCAATTGGGATTTGTTTCTACCCCTGATAATC  
CTATACATGACACATATAGGTATCTTACATCACAGGCAACACGATGCCCTGACAAACAAC  
CTGCTCCAGAAAGGAAAGATCCATATGAGCAGTATAACTTTTGGACTGTAGATTTAACAG  
AAAACTGTCTTTGGATTTGGATCAATATCTTTAGGAAGAAAGTTTTTATTTCAAGCTG  
GGCTACAACGGGCTTCTAGAGTGTCTAAATCCTCTGCTGCTAGAGCTTCCACACGGGGTA  
TTAAACGAAAACGGAGATGACCGTTTTCGGTTGCTGGGTCTTATAATAAAATATTTTATA  
AACTGTTTTGTTATGTGAGGCATGTTTTAACCGAGTTCGTGACTAAGATTGATTAACCCA  
CCTGCAACCGCACCCGGTTAATCAGATTATAAAGGTGCGCCGGTGTTACCTCTGGCTAC  
TTGGCAGTTACAAGTTCACCTCTGCCAGAAGTGTGTTTTTGCCAAGACATTTGCCAAGTA  
>gi|9627334|ref|NC\_001587.1|\_Human\_papillomavirus\_type\_34,\_complete\_genome  
ACTATAATCCTACTATAAAATATAGGGTGTAACCGAAAACGGTTGCAACCGATATCGGTG  
CATATATAAGTGCTGCAGTACACTGCTGGACAGATTGGGAAATGTTTTTCCCAATCCTG  
AGGAACGGCCATACAAGCTACCAGCCTTATGTGAAGAGGTCAACATTTCAATACATGAAA  
TAGAATTGGACTGTGTGATTGCGAACGACAACCTGTACAGATGTGAGGTATATGATTTTA  
TATTTAGAGATTTATGTGTTGTATATAGAAAAGGGGAAACCACTTGGGGTATGTCAACCGT  
GTTTACTGTTTTACTCAAAGGTTAGACAATATAGAAGATATAACCAATCAGTGTATGGAC  
GGACGTTAGAGAATTTAACTAACAAACAGTTGTGTAATATTTTAATAAGGTGCGGAAAAT  
GCCAAAAACCACTGTGTCCATTGGAAGGCAAGGCATGTAGATGAAAACAAACGGTTTC  
ACCAATAGCGGATCAGTGGACCGGACGCTGTACACAGTGTGAGACCATCTGCAACAG  
TGGTGTAAGAATGCATGGAAAAAACAAGTGTGCAGGACATTGTGTTAGATCTGAAACC  
AACGACCGGAGACTGACCTTACATGTTACGAGTCATTAGACAACCTCAGAGGATGAGGATGA  
AACAGACAGCCATCTAGAAAGACAAGCTGAGCAAGCCTGGTACAGAATAGTTACTGATTG  
CAGCAGATGTCAGTCCACAGTGTGTCTTACCATTGAGAGCACACACGCTGACCTATTAGT  
GTTAGAAGACTGCTTATGGGTGCACTAAAAATTTGTGTGCCCCAACTGTTCCAGACGCCT  
ATAACAGAAGATGGCTGATTAGGTAATTGGGAAGGGAGGTGTTCCGGGATGGTTTTAATGT  
AGAAGCCATTGTAGAAAGGAAAACAGGGGATGCAATACCAGCAGATGAAAATTTATGATGG  
GGACGATACAGAGGATTCTGAAATGGGGGATTTTATTGATAATGCACACATATCTAATAT  
ATATTCACAGCAGGAAATTGCACAGGCATTATATCACTCACAGCAAGTTAATGCAGACAA

TGAGGCTATACGTGTTCTAAAACGAAAGTTTGCAGGTAGTGCTGGCAGTAGCCCAGACAG  
TAAAAGACATGAATTGAAACACAAACAGCGTAGTCCACATATATTGACGATAAGGGACAC  
TAATACTACATCTACACACCTATTGTGTGAGGAACAAGACAGCGGATATGGCAATACTGA  
AGTGGAACCGTACGAGAGACAGGTACCGGGGCCGGGGGATGTTTACAAAGTACTAGCAG  
TAGTAACAACGGCAGCCAAATGGCGTCGCCAGGGGAAACAAATAGTGGGTCCAGTAGCAT  
TTCAAATATGGATATAGACATGGAAAGCACACCTATAACGGACATTACAAACATATTAAA  
AAGTAGTAATGTAAAGGCAACATTATTAGCAAAATTTAAAGAGGTATATGGATTAAGTTA  
TATGGAATTAGTAAGGCCCTTATAAAAAGTGATAAAACACAGTGTCAGGACTGGGTATGTGC  
AGTGTTTGGGGTAGCGCCATCATTGGCAGAAAAGTTTAAAATCATTACTAACCCAATATTG  
CCTATACATACATCTACAATGTTTAAACATGTTCTGGGGTATAATAGTATTATTGTTAGC  
AAGATTTAAGTGCAATAAAAATAGATTGACAGTACAAAATTTATTACATGGGTATTAAA  
TGTAACACAGGAATATATGTTAATAGAACCACCTAGACTAAGAAGCACGCCATGTGCATT  
ATACTGGTACAGAACTAGCCTATCAAACATTAGTGAAACGGTGGGAGAAGTACCCGAATG  
GATTAAAAGACAAACAGTAGTACAGCACAGCTTAGAGGACTGTCAATTTGACCTATCTCA  
AATGGTACAGTGGGCATTTGATAATGACATAACAAATGACTGTGAAATAGCATATAAATA  
TGCATTATTAGCATCTGAGGATAGCAATGCTGCTGCATTTTTTAAAAAGCAATGCACAAGC  
AAAATATGTTAAGGATTGTGGAACAATGTGTAGACATTATAAAGCTGCAGAACGTAAACA  
AATGACTATGTCACAATTGGATTACACATAGATGTGATTTAATAGATGATGGAGGAACTG  
GAAACATATTGTGCAATTTTTAAGATATCAGCAGGTTGAATTTGTACCGTTTTTAATTGC  
TTTTAAACAATTTTTAAAGGGTATACCAAAACAAATTTGTATAGTTATATATGGACCACC  
AGATACAGGAAAGTCACATTTTTGGAATGAGTTTAAATGCAGTTTATGCAAGGTGTGGTTAT  
TTCATATGTAAATTCCAATAGTCATTTTTGGTTATCGCCATTGGCTGATGCAAAATGGC  
ATTATTAGATGATGCAACACCTGCATGCTGGACATATATTGATAGATATTTAAGAAATGC  
ATTAGATGGCAATCCTATGTGTTTAGACAGAAAACATAAACATTTATTACAAATTAAATG  
TCCTCCATTACTAATAACATCAAATACAAATCCTAAAGCAGATGATACCTGGAAATATTT  
GCACAGTAGAATGAAAGTGTTTACGTTTTCAAATCCATTTCCATTTGACAGTAATGGAAA  
TCCACTATACCAACTTACTAATGAAAACCTGGAAGGCATTTTTTACAAAGACGTGGTCAA  
ACTAGATTTAACAGAGGACGACGACAAGGAAAATGATGGAGACACTGTGCAAACGTTTAA  
GTGCGTGTGAGGACGCAATCCTAGAACTGTATGAACGTGATAGTATACATTTAAGTGATC  
ATATTGATCACTGGAAACACGTGCGACTGGAAAATGTATTATTACATAAGGCACGTGAAA  
TGGGACTGCAATCAGTTAACCAACAAGCGGTGCCAAGCCTTGACAGTATCACGATCCAAAG  
GGCATAATGCAATTGAACTACAATTAGCCCTAGAAAGTTTAAATGAATCAAGCTATAACA  
CAGAAGAATGGACATTACAACAGACAAGTTGGGAACAGTGGGTAACGGACCCAAAACAAT  
GTTTTAAAAAAGGTGGAAAAACAGTAGAAGTTAGATATGACTGTGACAAGGACAACACCA  
TGCAATATGTGGTATGGACATTTGTGTATTATTGGTTGGAAGGCAAGTGGTATAAAGTGA  
GTAGCCATGTAGATTATAATGGTATATATTATGAAACACAGGACAATGAAAAGGTATATT  
ATACACAATTTGACAGAGATGCAAAACGATATGGGGTTAAAGGAATATGGGATGTATGTA  
TGGGCGGTAAAGGTAATATGTTTTGCTCCTGTATTTAGCCCGTGTGAAGTATCCACTCCTG  
AAATTGTTAGACCCCTGCACACAAGCAACAGCAGCAACGCACAGGACGCGGGTGTGCCAA  
CACGGAAACGGCATAGACAGTGTGACCCAGACGAGGGGCCCTTGGACTTTGTACATAACC  
TACAGCCCACAACAGACTCATCGACCCAGTGACTCTACATAATGTTGCGCCAATAGTAC  
ATTTAAAAGGTGACAAAAACAGTTTAAAATGCCTAAGATATAGGATGCATAAAGGTATT  
CACATTTGTTTAATAATGTAACAACCTACATGGCATTGGACCAATAATACAAATAGTAAAT  
GTGGTGTAATTACATTTATGTTTTCCAGTACATCCCAACAAAAACAATTTTTACAATGTG  
CTAAAATACCACTATATCAGTGTATCAGGGTATATGTCCATATAACACAAATATG  
TAACATTGGTTACAATTGTATACATTGGTATACTGTATAATGTCATGATCATTTTTATAT  
TTGTAATTTGTTTGTCTTTGGCTTTTATATGTGCCTGTCTGTGTGCTGCTGCAAGTGTCTG  
TGTGTGTTTATGCATGGTATTATGCTTTTGATTATAATTACTTTTTTACATGTGTCCCAAT  
CCCTGTTAAAGTATATATATATATGTGTGTTTATATTCTATGGCAGTGGTAC  
ATTACCATTGCTACCTTGCAAGTAACATAAATATTTTCATATATATACAATAAATTTATTG  
TTTGTGTACCAGTGTGTAGTTTACCATGCGTCGCAAGCGTGACACACATATAAGACGTAA  
ACGTGCATCAGCCACACAATTATACAAAAACATGTAAGCAAAGTGGCACATGTCCCCCTGA  
CATAATTCCAAAGGTTGAGGGCAATACTTTAGCTGACCAAATATTAATAATATGGTAGCAT  
TGGGGTATTTTTTGGGGGTTTGGGTATTGGTAGCGGGTCAGGAACCGGGGGTTCGTACAGG  
ATATGTGCCATTACCCACAACCTACTCCATCTAGACCAGTTGAAATTCCTTTGCAACCTAC

CAGACCTCCTGTTATTACATCTGTAGGGGCCTCTGATTCTTCTATAGTTTCATTAGTGGA  
GGAGTCAAGTTTTATTGAAGCTGGTGTGCCAGGTCCTACCTCCATAGTGCCTTCTAGTTC  
TGGATTTAATGTAACAACATCTGTGGACAGTACACCTGCTATTATAGATGTGGCAACTAT  
AAGTGACACTACACAAGTATCTGTTAGTACATTTAACAATCCAACTTTTACTGACCCATC  
CGTGTGCAACCTCCTCCACCCTTAGAGGCCTCTGGCAGACTTTTTATTTCAAATGATAC  
TGTAACTACTCATTCCTTATGAAAATATACCTCTTGACACATTTGTAGTTACAACAGATAA  
CAATAGTATTGTTAGTAGTACGCCCATTCCAGGGAGGCACCCTCCTGCACGCTTAGGGCT  
TTATGGACGTGCTATACAACAGGTTAAGGTTGTAGACCCTGCTTTTGTAACAACGCCTAC  
ACGTTTGGTAACATATGATAATCCTGCCTTTGAGGGCCTGCAAGATACCACATTAGAATT  
TCAGCACAGTGACTTGCATAATGCTCCTGACTCTGATTTTTTAGATATTGTAAAGTTACA  
TAGGCCTGCTTTAACTGCTAGAAAACTGGCATACTGTTAGTAGACTAGGACAACGTGC  
CACTATGTTTACTAGAAAGTGGCAAACGTATAGGTGGTAGGGTACATTTTTATCATGATTT  
AAGTCCAATACCTACGGAAAATATTGAACTGCAGCCTTTACTGCCTTCTGCATCTGCTAC  
TGTAACAGATGCTAATGGCATTAAATGATGGGCTATATGATGTATTGTTAGATAATAATGT  
AGATATTACTGAAGTGGAAACACCTACTGGTACAAACACACAAAGTGTTTTTGCAAGTGA  
GATTTCCACTACAACGCAAATACCACTATTCCTTTAAATGCTGGTTTGATACACATCC  
TGGCCCTGATATTGCTTTACCTGTACCTACTGCAGAAACCATTTTTACCCCAACTGTACC  
TGTACAGCCTTCTGGTCTATATATATATATGGGTCCGATTTTTATATTGCATCCTAGCTT  
GTATGTCATTCCACGCAACGCTAAACGTTTGTCTATTTTTTTTGCAGATGTGGCGACCTA  
CTGAGGCAAAAGGTATACCTGCCCCCTGTGTCTGTATCTAAAGTTGTAAGCACTGAAGAGT  
ATGTAACACGCACAAATATATATTATTATGTCAGGTAGTACAGCTTGCTGGCAGTAGGAC  
ATCCCTATTATCCTATAAAGGATACTAATGGGAAACGTAAGATTGCTGTACCTAAAGTTT  
CAGGTTTTGCAATACAGGGTATTTAGAATACGTTTGCCAGATCCCAATAAATTTGGGTTC  
CAGATGCATCTTTTTATAATCCTGACAAGGAGCGGTTGGTTTGGGCCTGTGCAGGCGTTG  
AGGTTGGACGCGGACAGCCATTAGGTATAGGTACTAGTGGTAATCCTTTTTATGAATAAAC  
TTGAGGATACTGAAAATGCTGCAAAATATATTGGTGGAAACATAGCAGATAGTAGGGAGT  
GTATGTCAGTAGATTATAAACAAACACAGTTATGTATTGTAGGCTGTAAGCCTCCCTTAG  
GGGAACATTGGGGTACAGGCACACCATGTGGTACCCAAAATGCTGGGGAATGTCCTCCGC  
TTGAATTAAAGAACCACTATACAGGATGGTGATATGATTGATGTGGGCTTTGGTGCCA  
TGGATTTTAAGGCCTTACAGGCAAATAAAAGTGATGTGCCCATTGATATTCCAACACTA  
TATGTAAATATCCAGATTATCTAGGCATGGCCGAGATCCCTATGGCGATTCTATGTGGT  
TTTATATTTCGTAGGGAACAAATGTTTGTAGACACCTATTTAACAGGGCAGGTACTGTAG  
GCGATGCTATTCCAGATGACTTAATGATTAAGGGTACAGGCAATACTGCATCGCCATCCA  
GTTGTGTGTTTTATCCTACTCCTAGTGGGTCTATGGTATCCTCAGATGCACAAATTTTTTA  
ATAAGCCTTATTGGTTGCAAAAGGCCAGGGACAAAACAATGGCATTGTGCTGGCATAATC  
AACTGTTTTTAACGTGTGTAGATACTACTAGAAGCACAACTTTTCAGTTTGTGTAGGTA  
CACAATCCACAAGTACAACCTGCACCATATGCAAACAGTAATTTTAAGGAATACCTCAGAC  
ATGCAGAAGAGTATGACCTGCAGTTTGTGTTTTAGTTATGCAAAATCAATTTAACTACAG  
ATGTAATGACATATATACATTCTATGAGTTCATAGTATATTGGAACAGTGGAATTTTGGTC  
TTACACCACCGCCTTCAGGTACTTTAGAAGAAACATATAGATATGTTACTTCACAGGCCA  
TTACATGTCAGCGTCCGCAACCTCCTAAGGAAACAGAGGACCCATATGGTAAAATGACAT  
TTTGGGAGGTAGACCTTAAAGAAAAATTTCTGCAGAATTAGATCAGTTTGCCTTAGGTA  
GAAAGTTTTTATTACAACCTAGGTATGCGTGCCCGTCCTAGGTACAGGCCTCTAAACGGT  
CTGCACCTTCATCATCTAGTACAGCACCTAAGAAAAACGTGCAAAACGTATTTAATTAA  
ATGTATGTGTGTTGTGTTTGTGTATGTGTATTGTGTGTTTGTATATGTTTGTGTATGTGT  
ATTGTGTGTTTGTATATGTTATGTAATGTATGTATTATTGTATTGTTGTATGTGGTGTGG  
TATTGTATGGCATATGGTGTGTACATGTGTGTGTATGTATGTATGTATGTGTTTTATGT  
TCAATAAACTATATATATTTGTGTGAGTGGTTTTTAATAGCCACTGTGTCTCCATTTTGT  
CATTCGCCATTTTATATATATTTTTAAAGTTATTCTGCGACCGCTTTCGGTTGCCATATACTAT  
AACATGCTTTTGGTCTGTTTTGTGCTGTTTTAGCACAAAGGTTTAATGTGTTTTGGCTTCCT  
GCAGGCAACTTGGATTGTACTCAAGCACTTAGGATTAACATGCTTCCTGCTTATGTTTCA  
TCCTACGCAAGGTCATACACGTTTTAAGGCGCCACCTGGCAGTTACTCATGTGTCTGCAAT  
TGTTACTACAATGTTTTGCACACACATTTTTTACCCACCCTCTCATAAAAATTGCTTTTTAA  
TCACATACTTGTACTATGTAAACAGTGTACCTTGGCAGAACATTGTATTTTACATGCCAG  
GTAATTGTTGAAAACCTGACTAAGCAGTGCTTACTCATTTTTGCACCTGGACTGTTAAACCG

TTTTGGATCACACAGTGTACCAACCCCTTTTATAATTATAAAAA

>gi|9627327|ref|NC\_001586.1|\_HumanPapillomavirus\_type\_32,\_complete\_genome

TAATCTTTGAATTATAAAAAAGTAGGGAGGAACCGATATCGGTTTAACCGAAAACGGTGC  
ATATATAAACACCCTGGGCAGTGGTCCTTGTTAAGGCAGAATGGCAAGTACTTCTGCCT  
CATCACAGCCAAGTACATTATACCAATTGTGCAAAGATTTTGGGCTGACCTGCGGAATT  
TACAAATCTGCTGTATTTGGTGTAAAAACCACCTTAACCAGTGTGAAGCGTATGCATATC  
ATTTTAAAGATTTGCACGTAGTGTGGAAGAAAGGCTTTCCATATGCCGCCTGTGCCTTCT  
GCTTAGAATTTTATTCTAAAGTGTGTGCACTGCGACACTACGACAGATCAGCATTTTGGC  
ATACAGTAGAACAAGAAACAGGACTACTGTTGGAAGAACAATAATTCGCTGTGCTATAT  
GTCAAAAGCCTTTATCGCCAAGTGAGAAAGATCATCATATTTATAACGGACGGCATTTC  
GATTCAATTTTAAATAGGTGGACGGGTCGCTGTACCCAGTGCAGAGAATAATGCGTGGAAA  
CGCACCAACGCTAAAGGACATTATTTTGTATGACCTGCCAACGTGTGACCCGACAACGTG  
CGACACACCGCCGGTTGACCTGTATTGTTATGAACAATTTGACACCTCAGATGAAGATGA  
TGAAGACGATGACCAACCTATAAAACAGGACATACAACGTTACAGAATAGTGTGTGGTTG  
TACACAGTGTGGACGGTCAGTTAACTTGTGTGTCAGTAGTACAGGCGCGGACATACAACA  
GCTGCATCAGATGCTTCTGGACACACTGGGCATTGTGTGTCCATTGTGTGCCTGCGTGG  
GTGACTGCAATGGCGGATGATACAGGTACAGAGGAGGGGCTAGGGTGTCTGGTTGGTTT  
TCTGTAGAAGCAATAGTAGAAAGGACTACAGAAAATACTATATCAGACGATGAGGATGAA  
AATGTAGAGGACAGCGGTTGGACCTCGTAGATTTTGTAGACGACAGCAGAATAATACCT  
ACAAATCAATTAAAGGCGCAGGCATTATTAAATAGGCAACAAGCACATGCAGATAAGGAG  
GCAGTACAGGCACATAAACGAAAGTTATTAGGCAGTCCATATGAAAGTCCCGCCAGTGAT  
TTACAGGAGAGCATAAACAAGAGCTAAGCCCTAGGCTTGGTGGATTACAGTTATGTCGG  
GGGTCCCCAAGGGGCCAAACGACGACTATTTCAATCATTGGAAAATCGCGACAGTGGATAT  
GGCTATTCTGAAGTGGAAATACGGCAGGAACAGGTAGAAAATGGACATGGCGCCCCAGAC  
GGGAGTATGGGTAAACGGGGGGGGCATGGGCAGTGTACATGGGGTGCAGGAAAATCAGGAA  
ATAGGCACAAAATACGCCTACAACAAGGGTGGTGGAAATTGCTTAAGTGTAAGAACTTGCAA  
GCAACATTGTTAGGTAAGTTTAAAGAGCTGTTTGGATTGTCATTTGGTGATTTAGTAAGA  
CAATTTAAAAGTGACAAAAGTAGTTGTACAGATTGGGTAGTTGCAGCATTTGGTGTACAT  
CATAGTATTGCAGAAGGCTTTAATACACTAATTAAAGCAGAGGCGTTATATACACACATA  
CAATGGTTAACCTGTACCTGGGGAATGGTATTGTTAATGCTAATTAGATTTAAATGTGGC  
AAGAATCGCACCACAGTGTCTAAAGGAATGTGCAAACCTATTAAATATACCTGCTAATCAA  
CTGTTAATAGAGCCGCCACGATTACAAAGTGTGGCAGCAGCAATATATTGGTTTCGAGCA  
GGAATATCTAATGCCAGTGTAGTAACCGGGGAAACACCCGAATGGATACAAAGACAAACA  
ATTGTAGAACATTGCTTTGCAGATACACAGTTTAATTTAACAGAAATGGTGCAATGGGCA  
TATGATAATGATTTAACCGAAGATAGTGACATTGCATATGAATATGCCCAACGTGCTGAC  
ACAGATAGTAATGCAGCTGCATTTTTTAAAAAGCAACTGTGAGGCAAAATATGTAAAAGAT  
TGTGGAATTATGTGTAGACACTATAAAAAAGCACAAATGAAACGTATGTCAATGCCACAG  
TGGATTAAACATAGAAGTGAAAGAACTGGCGATAATGGTGATTGGAGACCTATAGTAAAA  
TTTATTAGATATCAAGGAATAGATTTTTTAAACATTTATGTCTGCATTCAAAAAATTTTTG  
CATAATATACCAAAGAAAAGCTGTTTAGTATTAATTGGTCCGCCAAATACAGGAAAATCA  
CAGTTTGGAAATGAGTTTAGTAAAGTTTTTAGCAGGAACAGTAATTTCCCTTTGTAAATTCA  
CACAGCCATTTTGGTTGCAGCCATTAGACAGTGCAAAAATAGCAATGCTAGATGATGCA  
ACACCTCCATGTTGGACATACTTAGATACATATTTAAGAAATTTACTAGATGGCAATCCA  
TGCAGTATTGATAGAAAGCATAAAGCATTAACAGTTGTTAAATGTCCACCATTAAATAATA  
ACATCAAATACAGATATTAGAACAGAAGACAGATGGAAATACTTATATAGTAGAATTAGT  
TTGTTTGAATTTCCAAACCCATTTCCATTAGATAAAAATGGAAATCCTGTATATGTGTTA  
AATGATGAAAATTGGAAATCATTTTTTCAAAGGTTGTGGTCCAGCTTAGAATTTCAAGAA  
TCAGAGGACGAGGAAGAAAATGGAGACACTGGCCAAACGTTTAGATGCGTGCCAGGAACA  
GTTGTTAGAACTGTATGAGGAAGATAGTAAACATTTAGAAAAACATGTGCAGCACTGGAA  
GTGTTTACGCATAGAAGCAGCCTTATTATTAAAGGCTCGTGAAATGGGCTATGCACAAGT  
AGGACATCAAATAGTGCCAGCACTGGAAAATATCCAGGGCCAAGGCCACGTTGCAATTGA  
AATTCAATTGGCGTTAGAGACATTATTGCAGTCCACATTTGGTACAGAACCATGGACATT  
GCAAGAGACAAGTTATGAAATGTGGCATGCGGAGCCCCAAAAGTGTTAAAAAAAACAGGG  
ACGCACTGTGGAGGTTGTATTGATGGAAAATCCTGAGAATGCAATGCATTATACAGCATG  
GACATTTATATACGTGCAAACACTAGATGGCACATGGTGTAAAGTATACGGACACGTATG

CTATGCAGGACTATACTACATTGTGGACAACATGAAACAGTTTTATTGTAACTTTAAAAA  
TGAGGCCAAAAAATATGGGGTAACCGGACAATGGGAGGTACATGATGGCACTCAGGTGAT  
TGTTTTCTCCTGCATCCATATCTAGCACCACAACCACCGAAGCAGAGGTATCCTCTTCTGG  
ACTTACTGAATTGGGTACAAACCACCGACCTATACAACACCACACCTACACCCACAACCAT  
CACAAGGAGTAAC TGCGACCCAGACGGCAGACGGAATATTATACAAAGACCCACCCC  
GACCACCCCGCCGCGAAAACGATACCGACAGTCTTTGCAGCCACCAACAAAGCACCTGCA  
GCACTACGGCGTCACAAACGTACCCGTGGACCCCGGATCGCAAAGGGTCACATCTGACAA  
TAACAATAACCAGCGACGGAACCCGTGTGGAAATCAGACTACGCCAGTAATACACTTACA  
AGGTGATCCTAATTGCCTAAAGTGTTTAAGGTGGAGGTTAAAGAAAAAATTGTTCTCACTT  
ATTTACTCAAGTGTCATCCACATGGCACCTGACAGAAAAAGACTATACACGTGACTCAAA  
GGATGGTATAATAACAATTCATTATTATAATGAGGAACAACGAGATAAGTTTTTAAGTAC  
TGTA AAACTTCCTCCTGGTATTAATCCTTGCAATTGGGTACATGTCAATGTTACAATTTAT  
GTAGTGTGTACATATGTACAAACATATATAGGGGAACATTACTGTGAGTCCACTATTGTG  
TGGGACAACCGGCCAGACACTGCTGCTATTATTGTTTTATAGTTGTTGCTGCGTGTGTGTT  
GTGTGTGTGGATTAGTTTAATAGACCCCCCATATCCCTTGTGGGCCTCCTGTCTTGCTAG  
CTATCTAATATTAGTACTATTGTCTGGTGCAGCTACTAACATCTGTGCAATTTTTTTTT  
TTTAGCTTTGCTTGTTGTTGTGTTTCTGCCTTTTTACTAACCCTATTAATACACTTTGC  
ACTACATTAATGTAGAAGGTGTACATACAATAGTATAGCTGTGTGTGTGTTGTTGTCATG  
GTATACACAATAATTGTACATACGTGATAATATGGGTACATTGTACTTTAGAAAATGGCGA  
TGTGTGGCTGCTGCTGTGGTTTTTAGCCACAGTGTGTTTATTTGTATATTAGTACTGTTGTT  
AAACTACTGCAGACATACGTGTGTACATTGCTGTAAATAAAGTTGGGTTTTTGTATTGTT  
TGTACCAAAGTGATTATCAATGCCACCACACCGAAGTCGCAGACGCAAACGGGCATCTG  
CTACACAGTTATATCAAACATGTAAGGCCTCTGGGACATGCCACCCCGATGTAATTCCTA  
AGATTGAAGGTCGCACGTGGGCAGATCAAAATATTAATAAGGGGCAGCACTGGTGTGTTTT  
TTGGGGGCCCTTGGCATAGGTACCGGTGCTGGGTGAGGTGGGCGCACAGGGTATGTGCCTA  
TAGGAACACGACCGCCTGTTGTTGCAGAGCCGGGCCCTGCAATACGTCTCCAGTGGGTTG  
TTGACACTATTGGGCCTACTGACCCATCTGTAATTTCTTATTGGAAGAGTCTGCAGTTA  
TTGATTCTAGCATACCAGTGCCTACCGACACGTCTCATGGTGGGTTTAATATTACGTCCT  
CTGCAAGTGCCCCGTCCTCTACACCTGCTGTATTGGACATTTCTCCTCCCACCAATACTA  
TAAGGGTTGCATCTACTACGTCCCACAATCCAGTATACAGTGATCCTTTTACTTTACGGC  
CTTCTTTGCCAGTAGAGGGTAATGGTAGACTCTTAACATCCCACCCAACAATAGCCCCCTC  
ATTCGTATGAGGAAATTCCTATGGACACTTTTGTGGTATCCACAGATACAAGTAATACTG  
TTACCAGTACCCCTATTCTGGACCTCGCCCTACTATGCGCCTTGGTTTATATACCAGGG  
TCACTCAACAACGTCCAGTTGCTACTACAACATTTTTTAACATCTCCCGAGCGTTTGGTAA  
CCTATGACAACCCCTGCATATGAGGGTCCTGCTGAGGGTACGTTGGAATTTGAACATCCCA  
CCATTTCATGAGGCTCCTGATTCTGATTTTATGGATATTATTGCATTACACCGTCCTGTGC  
TATCTGCTAGGCAGGGCACTGTCCGTGTCAGTGCTATTGGGCAACGGGCTTCCTTGCAAA  
CACGTAGTGGGGCTCGTATTGGGTCTAGGGTACATTTTTTCCATGATATTAGCCCAATCA  
CTAGGCCATCAGAGGCTATAGAATTGCAACCTTTAGGCTCCTCCTCCACAGCTGTATCTA  
CTACTGCTTCATCCGCAATTAATGATGGCCTGTTTGATGTTTATGTTGACCCTGACATAC  
CTCCCTCACACGCGTTACCGCCCCCTACGGTCCCCCACACACGTGTCAACTGTTTCTTTAA  
CTAGTCTTGGTAGTGTTTCCTGCACAACTGCAAATACAACGTGTCCCTCTTTCCCTTACCTA  
CAAATATTAATGTAGGCCCTGACCTTTCACCTCCTGAGTCTCCGCCCTTTATTAGTACAC  
GTCCTGTATCACCTTCTTTTGACTCTGTTATGGTATTAGGATGGGATTTTATATTGCATC  
CCAGTTATATGTGGCGTAAGCGCCGTAAACCTGTACCATATTTTTTTTGCAGATGTCCGTG  
TGGCGGCCTAGTGACAACAAGGTTTATCTGCCCTCCTCCTGTTTCCAAGGTGGTCAGC  
ACAGATGAATATGTGCAACGTACCAACTACTTTTATCATGCCAGCAGTTCTAGGCTTTTG  
GCTGTTGGGCATCCATATTATACTATTAAGAAGACACCCAATAGAACATCTATTCCAAAG  
GTGTCTGGAGTTGCAGTATAGAGTATTTAGGGTTAGGCTTCCAGACCCTAATAAAATTTACA  
TTACCTGAAACAACTTATATAATCCTGAAACACAACGTATGGTGTGGGCCTGTGTGGGT  
TTGGAGGTTGGCCGTGGACAGCCTTTAGGTGTTGGTCTTAGTGGGCATCCTTTATTAAAT  
AGATTGGATGATACTGAAAATGGGCCTAGATATGCTGCAGGGCCTGGAAC TGATAATAGA  
GAAAATGTATCTATGGATTGTAAACAAACCCAATTGTGTTTGGTGGGTTGTAAACCTGCC  
ATTGGCGAGCATTGGGGTAAGGGTGCTGCTTGCTCTGCACAATCAAATGGCGACTGCCCA  
CCTTTGGAATTACAAAACAGTGTTATTCAGGATGGTGATATGGCAGATGTAGGGTTTGGAA

GCAATGGACTTTAGTGCTTTGCAAACCTCAAAAGCTGAGGTGCCATTAGATATTATGAAC  
TCCATTAGTAAATATCCTGACTATTTAAAAATGTCTGCAGAGGCCTATGGCGACAATATG  
TTTTTCTTTTGAGACGGGAACAAATGTTTGTTCGTCACCTGTTTAATAGGGCAGGAACC  
CTTGGTGAACCTGTTCCCTGAGGACATGTATATAAAAGCTTCTAATGGTGCTTCTGGCAGA  
AATAATTTAGCTAGTAGTATTTATTATCCAACCTCCAGTGGTTCTATGGTCACCTCTGAT  
GCACAAATATTTAATAAACCATATTGGTTACAGCAGGCACAAGGCCACAATAATGGTATA  
TGTTGGGGTAATCAAGTGTTCCTAACTGTTGTGGATACTACCCGTAGTACTAACATGACT  
GTGTGTGCTACTGTAACAACCTGAAGACACATACAAGTCTACTAACTTTAAGGAATATCTA  
CGCCATGCAGAGGAATATGATATACAGTTTATATTTCAATTGTGCAAAATTACATTATCT  
GTAGAGGTTATGTCATATATCCACACCATGAATCCTGACATACTAGACGATTGGAATGTT  
GGTGTAGCTCCACCGCCCTCTGGTACTTTAGAAGATAGTTATAGATTTGTGCAGTCTCAG  
GCCATACGATGTCAAGCTAAGGTAACAGCACCTGAAAAAAGGATCCTTTTTCTGACTAT  
TCATTTTGGGAAGTAAATTTATCTGAAAAGTTTCTAGTGATTTAGATCAGTTTCCATTG  
GGTAGGAAGTTTTTACTGCAAGCTGGGTACGTGCAAGACCTAAACTTACAGCAGTAAAA  
CGAACAGCATCTTCCAGTCAAAAGTCTTCTCTCCTGCAAAACGCAGAAAAACACGTAAA  
TAATATTTTTTCCGTGTGTGTATGTGTTGTGCAACTTGTGTGTGGTGTGCATGTATTGTGT  
ATATGTGTGTTTCGGTGTGCATATTAATAAAGTATGATTGTGTTTCATTGTATGTTGTTGT  
ACCACCATTTTATTTTTCAATCCTCCATTTTAGTACATGCAACCGAAATCGGTTGCCGTT  
GGCAATGTCCATTAAATTTAGCAAGCACATGCAGTTTTTACTGCCAAATATATGTACTG  
CCAAATGGTATTGCTAAGTAGCAAAATGTTTTTACATACATAACATACACGCCCTTTTGC  
ACAAGCATGTTTTAGAAAGGTTGGCATAGCTTTTGCAATTTACTTATTTCTTCTCCTTTG  
TTCATGTTATGACTACTGTATTTGTTATGTATAATTAATAATGCTTTTAGGCACATATTTG  
TGGGTTTTTGGCACAGTACTTTACAAGTTACTCTGGCCTAGACAAGACTAGTGCTTTGTCA  
TGCCTTATATAACTAAGTATTAGTCACTGACTGCATCTAATTAAACTGTCAACCGAAATC  
GGTGCATAAAATCCTAACTTGTTCTGTTGTTATTATAAAGTA

>gi|9626605|ref|NC\_001458.1|\_Human\_papillomavirus\_type\_63,\_complete\_genome

GTTAACAACATATCAGGCGATTCTCTAGTTCTAACACGAACGTTTACGGTCGTTGCCAGCT  
TTTTCTTATAAACTCTGGTGGGAATTTCTCTTGGGACAGATGGACCTGACATCTGTAC  
ATTCGGTTCGGGATCTGAGTTCTGCTCTCCGTATCCCATTTATTGATTTGGTTGTTCCCTT  
GCAATTTTTGCTTGAAATTTCTTACAAATGCTGAAAAATTGCTGTTTGATTATTTTGACT  
TGCATCTTATCTGGCGAGATAATTTTCGTGTTTGCTTGTGTCAGTGCTGTGCTAGGCATG  
TTAGTCTGCTTGAGTTTATGCTTTATTATCAGGAGTCTTTCGAGGTATCTGAAGTAGAAG  
AATTACTTAATCAACCTCTTGTAATATTTGGTTTAAGGTGTGTTACATGCACAAAAAAC  
TGACTGTTTCAGAAAAGTTAGCTGTTGTTTCTGCTGGAGAAAGAGTTCATAAAGTAAGGA  
ACAAATTCAAAGCAAAGTGCAGTTTGTGCAGACTCTACATTATATAGTTTGTGCAGACTC  
TATATAATTAACAATGGTGGGAGAGCAGCCAAATATAGGTGATTTGGTGAGTCAAGAAGA  
ACCAAGCGTCCTAGATCTAAATTGTTATGAGGATATACCTGCTGAGGAGGAGGAGTCTGA  
ATATCCATATGCAATTGTGCTTCCTTGTGGTTTGTGCGATCAGCTGTTAAGGCTGACCTG  
CGTTTTCTGACCTGTCTACTCTTACGCGTCTGGAGGAGCTGCTGTTAGGCTCACTGAGGAT  
CGTGTGTCCCTGTGTGCCATTTCGACACCAACGACACTAAGATGACCGACAGAGGTACAA  
ATAATGATGATTGGTATATTGTGGATGAGGCAGAATGTCTGGGATGATGATGAGAGCGAAT  
TGGAGGATTTGGAGGACACCTATAATTCATTGTTTAATAGATCTGAAAGTGACATATCAG  
ATCTATTAGACGATACGCAGCAAAGTCAGGGAAATTCCTGGAAGTGTCCACTTACAGG  
AGCACTTGCAGAACGAGCAGGACCTAAATACCTTAAACGAAAGTACTTAAACAGTCCTC  
CGCAGGCAAGTGCCACAGAGACTGCCTGCAATAGCCTCAGTCCCAGATTGGAATCTATAA  
CAATTTTCGAGAGGGAAAAAAGGCAAGAAAGCAACTATTTACACAAAAATGACAGTGGCA  
TAGAGTTATCGCTATGCCAGGATGAAGTTGACAATATTAACGAAGCGCTTCAGGAGCAGG  
TAGACATCGTACAGTCTCTGGGAGGTGGGGTGCGTGACTGTATAGGAGTGGACATTTTGA  
AATGCAGTAATACAAGATCTGCTCTACTTGCCAAATTTAAAGACACAGTAGGTGTGAGTT  
TTACTGACCTCACCAGAGCATACAAAAACAAGACATGCTGTAGTTACTGGGTCATAG  
CAGTGTGGGGAGTAACATCTACGTCTGTGGAGTGTGTAAGTGTGTAATCTCGTAACTAGCAGTTTGA  
ATGTGCAAAAGTAATTACATAATGGCTGAACCACCAAAAAATAGAAGTATGGCGGCAGCGT  
TATATTGGTATAGGAGATCTATGTCTCCAGCTGTATATACCTGGGGAGAAATGCCAGATT



GGATGGCGCAGCAGACATTGTTGAATCATCAATTAGCATCAGAAAAGCATTTTGAATTGT  
CACAAATGGTACAATGGGCTTATGATAATGGCTATACAGATGAAAGTGATATTGCATACT  
ATTATGCTATTTTAGCAGAAGAAGATGAAAATGCAAAGCATTCTTGGCTTCTAATGCAC  
AAGCAAAATATGTTAAGGACTGTGCTAGAATGGTTAGTCATTACAAAAGGGCAGAAATGA  
GTAGTATGTCTATGTCAGCATGGATTTATAAAAGACTGGAGGAAGTTGAAAATGGTGGTG  
ACTGGAACATATTGTAAAGTTCTTGAGGTTTCAAGAAGTAGAATTTATAAGTTTCATGA  
TAGCATTTAAGGAATTGTTAAGTGGTAAACCAAAGAAAAATTGTCTTGTAATATATGGTC  
CACCAATACTGGTAAATCTATGTTTTGTATGAGTTTGTGAGAGTATTTAAAGGAAAAAG  
TAATATCTTATGTAAATAGCAAAAGTCAATTTTGGTTGCAACCACTAGCTAGCACTAAAA  
TAGCATTATTAGATGATGCAACAAAACCAGCATGGGATTATATTGATTTATTTTGGAGAA  
ATGCTTTAGATGGGAATCCTATTTGTGTAGATCTGAAACATAAGGCACCACAACAAATAA  
AATGTCTCCACTTATGATAACTTCTAATATAAATGTTAAGGCTGATGTATGTTGGATGT  
ATTTACATAGTAGGATAACATGTTTTGAATTTAAACAACCTTTTCCATTTGATGAAAATG  
GTCAACCGGCATTTTCTTAAACAGACATCAATTGGAATCTTTTTTTGAAAGGTTTTGGA  
GCCAGTTAGACTTAAGTGACCAAGAAGACGAGGAGAGTGATGGAAGCCTCAACAACCGC  
TTAGACTGGCTACAAGAGCAGCTTCTAACTCTATATGAGAAAGACAGTAAAGATATTGAA  
GATCAGATAATGCAGTGGAATCTACTTAGACAGGAACAAGTGTTATTCCACTATGCCCGA  
AAAAAGGGAATAATGCGACTTGGCCTGCAAGTTGTGCCTTCCCTTGCAGCTTCCCAGGAT  
AAAGCAAAAACAGCTATAGAAATGACTCTTTATCTTAGTGGCCTCAGAGACTCACAATAT  
GGTCTGAACAGTGGTCTTTACAAGATACTAGCAGAGAAATCTTTTTTAGCACCACCAGAT  
CATACATTCAAAAAGGGAGGGCAACAATGTAGGTAATCTATGATGAGGATCCCAATAAT  
AGCACCAGACATACTGTATGGCGCCATATATATTATCAAAACGGTGATAACAGATGGAGA  
AAAGCAGCTAGTGATGTAGATGTTTCATGGTGTGTTTTATTTAGAATATGATGGTGTCAAA  
AACTACTATGTTGACTTTCAAGAAGAGGCCAATCGATATAGCAAAACAGGTCGATATACT  
GTTCAATATGAGGGTAAAAGGTTTCAAAAATGTTATGTCTCCTGTCAATAGCTCCCCACTA  
CGGACTTCTGGGTCTCCTACAGACACCAACCCAGCCACCCAAGGACAATCCACCCAACT  
GCCAGAAAAGCAGAGACGAAGGGGTGAGACACCACCCGAAATCGCCGGCTGTTTCGCAAG  
CGACGGCCCTACGGACGAAGAAGGTCCAGAAGTCCCAGAGATACCACCTCAGACGAGGA  
GAAGGAGAATCGGCCAGAGCCTCTGCCGGTAGTGGAGAACGGGTGGCATTCAATTTCTCCG  
GGAGACGTTGGAACATCAACTAGGTGCCTCCAAAGGGAGGTCAATCAAGACTTCGAAGA  
CTTATACAGGAGGCTCGGGATCCACCCATAATTTGTCTGAAGGGGGGCCCTAATCAACTT  
AAGTGCTTAAGGTATAGGATTAAAGCTTCAAATTCATCTGACTTTGAAAGTATCAGTACT  
ACATGGCATTGGGTACATAATAAATGCACAGATAGAGTAGGTCATGCACGTATGCTGGTG  
CGTTTTTATATCAACAGAACAACGTGACCGATTTTTTAGATAAGGTGGTGGTGCCTAAATCT  
GTTTCTGTTATTTTAGGGGCATTTGACGGTTCCCTAAGGGTGGGTGTTGGGGTATATTTTG  
TAATCATGTTAAGAGTACGTAAACGACGAGCTGCTCCACAAGATATTTATCCTGCTTGTA  
AGGTTGCAAACAATTGCCCCCTGATATACAAAATAAAATTGAACAAACAACAGTTGCTG  
ACAAGATTTTACAATATGGGAGTTTGGGAATATTCCTGGGAGGTTTGGGTATTGGTACTG  
GCAAGGGTGGGGGTGGCCGGTATGGTTATACACCTCTAGGGGACAGTGGTGCGGTGCGAG  
TTGGTGGCAGAAGTACACCTGTAAGACCAACAGTACCTGTGGAGACTGTAGGACCAAGGG  
ATATATTACCTATAGATTCAATTGGATCCTTTAGGGCCCTCAGTCATTGAACTAGAAGATA  
TTCCAGCCACAACAGTGGAAGTAGTGGCTGAAGTGCATCCCATATCTGATACTCCACAAA  
TACCGGCACCTACTACTGATGAATCTAGTTCAGCTGTTCTTCATATTCACAAAGAAAGTC  
CTGCTGCACGTACAATCACACGTTCCCAATACAATAATCCTTTATTTCAGGATCACAGCTA  
GTGCAGACATAGCATCAGGTGAAGCTTCAGCATCTGATAATATTTTTATAGATGTAGATA  
CGCCGGGTCAAATAGTAGGACAAGAAATACCACTAGTTAATTTTGATATGGGACCTATAT  
CTACTGAAGGTGAGCTTGAAGCTGAGTTCACAACCTAGTACACCAAGAACCACACAAGTAC  
AGGAAAGGCCTACACGTTCTATAATAGACGCTATTATGAACAAGTGCCAGTTACTGCAC  
CTGAATTTATCACAAGGCTGCTTCCTTAGTTACTTTTTGAGAATCCTGCATTTGAAAGGA  
GTGATGCTTTGATTTTTGAACAAGATTTTAGAAGATATTTTAAATGCTCCTGATCAGGATT  
TTAGAGACATTGTTTATTTAAGCAGACCAACATACAGTCGTGCCCTGATGGCCGCATGC  
GCCTAAGCCGCTGGGACGCAGAGCCACTATAAGTACCAGAAGTGGTGTACTATAGGTG  
CTCAATCACACTTTTTATATGGATATTAGCTCTATCTCCTCAAATGATGGCATTGAGTTAC  
AAACACTGGGTGAAGCTTCTGGCGAGACTGTGGTGCAAAGTTCTCTTGCTGCATCGGATC  
CTATTGAAGCAGAACATTCATTCATTGAACCAGCACCATCTATAGATAGTTATGATATTG

TTTCACTTCAGTCTGAGACTTATTCAGATGAACATTTGTTAGATATGTATGAACCTGTAG  
GTTCTTCCTTGCAATTACAAATATCAGACGTCAGAGGTCGGCCAACTGTTATTGATATTC  
CCTTTAGACCCCGCAGGCCTCCATTAGGTCTATAAATGCTGGTGTGATATCTATAGTC  
CAACTGCTAGTGTGGATCACCTACTATAAATCCTACTGATCTTGACATTCATTAAATTA  
TTATACATTTAGATAAATCAACAGGGGATTATGATTTACATCCAAGTTTGCGTAAACGTC  
GCAAAATTAGTTCATATTTGATATTTTACAGATGGCTGTTTGGCTTCCTGCCCAGAATAAG  
TTTTACCTTCCTACCCAACCGATCACCAAGATTCTAAGCAGCGATGATTATGTGTCTCGC  
ACCAACATCTTCTATCACGCTACCAAGTGATCGACTGCTCATTGTGGGACACCCGCTCTAT  
GAGGTTACCCGTGCAAATGATAACACTATGACTGTGCCTAAAGTTTCTCCAAATCAGTAT  
AGAGTCTTTTCGTGTTAGATTTCCAGATCCTAACCGATTTGCCTTTGGAGATAAGGATATT  
TTTGACCCAGAACTGAGAGACTAGTTTGGGGTCTTAGAGGCATAGAAAATCGGTAGGGGT  
CAACCATTAGGTGTGGGTATTTTCAGGCAATCCATTATTAAATAGGTTTGATGATGCTGAA  
AATCCTAGCAGATATAATAATACACATGCAACTGGTGATAATAGGCAAAATGTTGCTTTT  
GATGCAAAACAAACCCAAATGTTTCTAATTGGCTGTACACCAGCCACTGGGGAACACTGG  
TCAATAGCTCGACGCTGTGCAGGAACACAGTTTCAGCTTGGAGATTGTCCTCCTATAGAA  
TTAGTTAACACAGTTATTGAGGATGGTGATATGTTTGACATAGGTCTAGGTGCTATGGAC  
TTTGGTTCCTTGCAAGCAAACAAAGCAGATGCTCCTTTGGATATTGCAGGCACTGTCTGC  
AAATATCCAGATTATATTTAAATGGGACAGGAAGTACATGGTAATTCTCTGTTTTTCTTT  
GCTCGCAGAGAACAAATGATTATTTAAGGCATGTATTTACACATCGTGGAATTGTTAGTGAA  
AAGAGAGAAAGTCCCTACCAGTGCATATATGCTGCTAAAGCCGAGCAACCCCAAATACT  
ATTGCTACAGATAAATTATTTTGTAGCTCCCAGTGGATCTTTAGTGTCTCTGATGTGCAA  
ATTTTTAATAGGCCCTATTGGTTACAACGTTCTCAAGGACAGAACAATGGTATCTGTTGG  
AGAAATGAGTTATTTGTAAGTGTAGCTGATAATACCAGAGGAACACGATGAATATAAAT  
GTTCTTAAACAAAGCAACCCCTGAGACTTATGATAGCGCAGATTATAATGAGTATACTCGC  
CATGTGGAGGAATATGAGTTATCCTTTATAGTTTCAGCTTTGTAAGGTAAAACCTAACACCT  
GAAAATTTAGCATTTTTTGCTAATATGGATCCAACAATTATCGATTCCCTGGCAGTTAACA  
GTTTCTCAACCTCCTGCAATGCTATAGAGGACAAGTATAGATTTATTGAATCATTAGCA  
ACAAAATGTCCTGATAACGTGCCCCCACCCTCCTACTGATCCTTACAAAGATTTACGT  
TTTTGGGATGTAGACCTCAGTGAGCGAATGTCGGAGCAGCTTGATCAATTCCTTTAGGC  
CGCAAATTTTTGTATCAAAGTGGTCTTGACACAGCGTTCTGTTCCAAAACTGTGAATTTT  
AGAAAACGTAGATCCTCCAATACTACTGTGGCCAAACGGAGGCGACGGGCTGAATATAC  
ATGTGAATGTTGAATTATATAATGTGAATTGTGAATTCCTTGACTTTGGCACTTGCACTTT  
ATTCTTTGGCATACTGATACTTGAACTTGTTCATGCTTGAAGTTACACACCTGTACAG  
TATTGTTAATAAACGTTTATGCTGCTGTCAATTTACCTGTCTTCGAGTCATTATTGCCTAG  
TCATATAGCCTCATGACTTGGCATGCAATTGGTATGTGGCAGATACTTCAAACAGGATAC  
TGGTATCCTTTTTGGCGCGCGCGCAATTTTGAAGTTACCACTGTTCCAACCTGTTCTGA  
GACGTCTGGATCTGATCCCGACCGCTGTGCTTACTGCCAAAGACGAAAGTGGTAGGCGCG  
AACCGTTTGTGGTTTCCCTGGGGCTAGCAGAACTCTTTAGGTTGCGACCGTTTTCGGTC  
GGGCCAATAATCTCTTTCGATCGTTGTT

>gi|9626041|ref|NC\_001354.1|\_Human\_papillomavirus\_type\_41,\_complete\_genome

ACAATCATAATCATCGCCCTTTCGTGTTATTTCTTGTAACGAATTCGTTACAAAACACAC  
ACACAGTATATAAGATAGAGGAACGGATTGGTACACCACAGATGGCATCAACAAGCGGTG  
TGGGATCCGTCGGGCCTGCAAGCTGTTGCGAGACGCAGAAGCCACATACCATACGGGAGT  
TGTGTTTGGCGCAGCAGATAACTTATCCATGCATACAGCTCTGCTGCCATTATTGCTATA  
AGATCCTTAGCGTATTGGATATTTACGCTTTCGACCAGAGCTGTCTGTACTTATCCTGGG  
GAGAAGGGGGGCCAACGGGTATTTGTTCTCAGTGTACTAGAGTGCTTGCAAGGCTGGAGT  
TCACTGCACGGCACGAAGTGTCTTGTGCAGCCAGCCGTCTGCCGCACTTTATAGGACAGA  
GCCTCAGCGACCTTGAGGTGAGGTGTGTGAGGTGCCTAGCTCTTCTACAATCTGTGGAAA  
AGGATTACATATTGCGGGAAGACTTGTCTGTGCATAGAATTGGCGGGATCTGGAGGGGAA  
CTTGTTGTTTCGATGTATGGTAGGACTGTATTAGCTGTGAGACTAATATACTGTTTGCTGTA  
TTGTATTGCTGTAATCGTGCGTAAATTGCTATACCTGTAATAATGAGAGGGAATAGTGT  
TGACCTGCAAGAAATTGTGCTTGTTCAGCAGGGGGAGGTACCTGAGAATGCTGCAGTGCA  
TTCAGGGGAGCATTCCTGATGATGAGGGTGAGAGCGAGGAGGAGGAGCGGGAACAGGTGCA  
GCAAGTCCCCACACCAGGAGAACATTATACCTGGTAGAGAGTCAGTGTCCATTTTGCCA  
GGCTATCATACGATTTGTATGCGTAGCAAGCAACACTGGGATACGGAATCTACAGGCACT

CCTGGTCAACAGTCACCTTGACCTCGCTTGTACGCCTGTGTGCGAGCAGAATGGCGTCCA  
GGGTCTCAGACACCGGCAATGGCAATGAAAACAAAGAGAATGAAGGTACAGTGGCATCTG  
ATCATTCTGAGGCGCGTTGTAGCTATATATTATTTGAGGCTGAATGTAGCGATGGCGGGG  
ACGATGAGGAAAAGTATGGAGGATAGCTTGGTGGAAGACCTTGTGGATGATGCTTCTGTGC  
ATCAGGGAAATTCCTTGTGCTGCTTTTCATGCCCAAACCTGTGCGAGGAATACGAGGGAGAGA  
TCCAGAGCCTAAAACGAAAGTTTATCCTGAGTCCCCTTGCATAGGGATGTGGCAGAACTAA  
GCCCCGCTCTGGCGGGTGTTCCTGGAAGAAAACCGTGGGAAAAAGGCTCGCAAATCTC  
TGTTCCACGATGACAGTGGCATAGACAGCAGCGCAGTGGAAGTCTCCCAGCTATCTAGTA  
CGCCATCAGCTCCAGGGCCAGACATCCGGCTGCCTAAACCCTCAGATATAGATCTAGAGC  
CACTGTTCCAAAGCCGCCAGCGCTGTACGCATATGTATAGCAAATTTAAAGCTGTGTACG  
GGGTAGCTTTACAGATATAACCAGGCCATTCAAAGCGACAAAACAACATCACAGCATT  
GGGTGTGGCCGCTACTATTTAGCTTTTGATAGTGAGATAAGTGCTATGGAGGTTTTGC  
TGCGACAACAATGCCAATTTTTATACATTGACAACAATGATGGCATTATACTGTTCTTCC  
TGGAATACAACGTGCAGAAATCTAGGACTACAGTGTACAATTGGTTTACAGCCAATTTCC  
ATTATAATGAAAATAGAATGCTAGCTAATCCGCCAAGGACACGAAACATGCCTGCTGCTT  
TATTCTTCTATCATAGATTTATGGGTACAGGGGGTATAAAACATGGCGCAATGCCAGAAA  
TAATTGTAAACCAAGTGCCTGGTGTCTAATCAGCAGACAGACACCTTTGAATTATCACGTA  
TGGTACAGTGGGCACTGGACAACGATCTGCAAGATGAACATATGTTAGCTTTAGAGTATG  
CTTTGCTTGCTGAAAGTGATGGCAATGGCGCGGGCTTTTTTAAAGCAGAAATAATCAGCCAA  
TGATAGTGGAAGAATTGTAGCATAATGGTTAGACACTACAAGACAGCGCTGGTCGCAAAAA  
TGTCTATTTACAGTATGTGAATAAGCGGTGTCTGGACCATGGGGAAGCTGATGAAAACA  
GCTGGCGGGGAATTGTGCATTTTCTGAGGTATCAAGGTCAGGAATTCCTGCCCTTCATGT  
GTAAAATGCACAATTTCTACACCATAGACCAAAGAAATCAACACTTGTATTATGTGGAC  
CGTCGGACACAGGCAAATCATATTTTGCCAATGGTCTTAACAAATTTTTGGATGGACACG  
TGCTGAGCTTTGTCAGCAATGGGTACATTTTTGGTTATCACCATTACGTGGGGCACGGT  
GCTGTCTAATAGACGATGCGACCCTCACGTTTTGGAGGTACGCGGACAAAACATGAGGG  
CACTGCTAGATGGATATGAGATTTCCATTGATGCAAAACACAGAAACCAATGCAAACTA  
GAGCACCACCATTAATAATAACCACAAATGAGGACATTATGCGATTAGATGAATTCAAAT  
ATCTGCAAAACCAGAACAATGTATGTGTACTTTAACAAGCCATTTCTCTTAAAGGAAATG  
GGCAACCGTTATATTACATTGATGGTTATACATGGAACCTTTTTTTTAGGAAATTTTGGC  
GTCACCTAAATCTAAAAGACCCTGAGGATGAGTCAGATGGAGAGACTCCTGGAACGATTA  
GACTATATACAAGAGCAGATACTGACACTATATGAGAAAGATAGTGTGACCTAGAGGAT  
CATATAAGGCTATGGAATCTGCTAAGGAGGGAAAATGCAATCTGGTATGTACTCAGACAG  
GAAGGACACGCAAGGTCGGCGGCAGAGCGGTGCCGGCAATGACGGTATCGGAAGCCAAT  
GCCAAATTCGCAATAGAAATGCAGATAAAGCTAGAATCACTAAAGGCCAGTCCCTATGCG  
GCCGAGGGCTGGTCATTGCAAGAAACCACCAAGGAACGGTACTTGGCTGAACCGTCTCGG  
ACATTTAAGAAATTAGGGCAGCCAGTTACCTAATGTTTGACAATGATCCCGAAAACCTT  
ACAGAAAGTTGTATTGTGGAATGGGTTTATTATATTACACCAACAGATGAATGGTATAAA  
GCTAGAGGTGGCATTGATGACACTGGTATATACTACATTGACCACGAGTCTGTTAAAATG  
TACTATGTGAGATTTGACATGGAAGCGGAGAACTTTAGCGAGACAGGCACTGTCACCTAC  
CGGCTAGGCAGCGCCCTGGTAAATGTACCTGAACCTGTAACCTGTTACCGACAGCTCCTCC  
ACGAGGGAGAGAAACCCAAAGGTACTACGACCGCAGGGGTCGAGACGACGCAGAAACGAG  
GAAACGGGGGAGCCGGTCGCCCCAGCCCCCTAAGCGAAGACGAGGAGCTTACGGACGCAGA  
TCCTCCCCGAAGGCCAACGCAGGACCGCGGCGTCGCCTGTTTCTAGAGGAAACGGAGGA  
TCGTCTGACTTCACTTCTGGAGAGTCTGACGAAGGACATCGAGTCAGACATAGAGCACTT  
CGAAAGAAAAC TGCGGGTGTGCTCCAGCAGAAGGACACTATCTAGTTGGCGCCAAAGGT  
CCAGTGAATAGCTGCGGTGCTTAAGGTACAAATGGAAAAACAAGTATAGCGGTGACATA  
ATGTATCTGGGGACTACTTTTACATGGAGGAGTCTGACGGGACAGAACGGTGTGGGTGCG  
GGCGCGCTTTTTTGTGCTTTTCTAATGAAACAAAAGAGAAAAGTTCTTCAAATCTGTC  
AAGATTCTCTAAAAACATTGGGCTGTTTTCGGCACACGCAGAAAAGCTGTGACCTGTGTAT  
CATTAACAATGCTTGCTAGGCAAAGGGTTAAACGCGCTAATCCTGAACAACGTGTATAAG  
ACATGCAAAAGCAACGGGGGGCGATTGTCCACCCGATGTTATTAAACGCTATGAGCAAAC  
ACACCTGCTGATAGTATATTAAAGTATGGGAGTGTAGGGGTTTTCTTTGGCGGTCTGGGC  
ATTGGCACAGGACGTGGTGGCGGTGGCACAGTGCTTGGGGCTGGGGCAGTTGGGGGACGC  
CCGTCCATATCCAGTGGTGCAATTGGTCCCCGGGATATTTTGCCAATTGAATCAGGGGGG

CCTTCACTGGCAGAGGAAATACCTCTGCTTCCCATGGCACCCCGTGTGCCAAGGCCTACA  
GATCCCTTTCGGCCGTCAGTGCTGGAAGAGCCTTTTATTATAAGGCCTCCTGAACGCCCCA  
AACATTTTGCATGAGCAGCGTTTCCCTACAGACGCTGCACCATTTGACAATGGCAACACA  
GAAATCACAACCATTTCCTAGCCAATATGATGTTAGTGGGGGAGGGGTTGACATTTCAGATA  
ATTGAACCTCCCTAGTGTGAATGACCCCGGTCCCTCGGTTGTTACCCGCACACAATACAAC  
AATCCAACGTTTGGAGGTGGAGGTGTCCACTGACATTAGTGGAGAAACCTCATCAACGGAC  
AACATTATTGTAGGAGCTGAAAGCGGTGGCACATCCGTAGGTGACAATGCTGAACTGATA  
CCTTTTGCTAGATATATCCCGGGGGGACACAATTGACACAACAATACTTGCCCCCTGGCGAG  
GAGGAGACTGCCTTTGTGACCAGCACTCCTGAACGTGTGCCTATACAGGAGCGATTACCT  
ATTAGGCCCTATGGCAGACAGTATCAGCAAGTGCGAGTTACCGACCCTGAATTTTTTAGAC  
AGCGCTGCAGTACTTGTCTCTTTAGAGAATCCAGTGTTTGATGCAGACATTACTCTCACG  
TTTGAGGATGATCTGCAGCAGGCACTACGTAGTGACACAGACCTGCGGGACGTGCGTTCGC  
CTCAGTAGACCTTATTACCAGAGGCGCACTACTGGCCTTCGTGTTAGTCGCCTGGGGCAA  
CGTCGGGGTACTATATCCACGCGCTCTGGTGTTTCAGGTAGGCTCCGCTGCTCATTTTTTTC  
CAGGACATTAGTCCAATCGGCCAGGCTATTGAGCCAATTGATGCAATTGAACTAGATGTA  
CTGGGTGAGCAATCCGGTGAGGGGACTATTGTGAGAGGAGACCCTACGCCTTCTATTGAG  
CAAGACATAGGACTAACCCTTTGGGGGACAACATTGAAAATGAATTGCAGGAAATAGAT  
TTATTAACCTGCGGATGGTGAAGAAGACCAGGAGGGCAGAGACCTGCAGTTGGTATTTTTCC  
ACTGGCAATGATGAGGTGGTTGATATTATGACTATACCTATACGTGCAGGCGGGGATGAC  
AGGCCTTCAGTATTTTATTTTTAGCGATGATGGCACTCACATTGTCTATCTACTAGCACA  
ACAGCCACCACCTTCTGCTGCCTGCACAGCCAGCGATGTGCCCTACATTGTTGTTGAC  
TTGTATAGTGGAAGTATGGATTATGATATACATCCTAGCCTGTTGCGCAGGAAACGTAAA  
AAACGCAAACGTGTTTTATTTTTTCAGATGGCCGTGTGGCTTCCAGGCCCAAATAGATTTTA  
CTTACCCCCCTCAACCTATACAACGGACATTGAACACAGAGGAATACGTGAGACGCACCAG  
TACTTTTCTCCATGCTGCCACTGACCGTTTGCCTTACTGTTGGACATCCATTTTACAATAT  
TACTAATGCGGATGGCAAAGAGGTGGTCCCTAAAGTTTCTCTAATCAGTTCAGGGCCTT  
CCGTGTCCGTTTCCCAAATCCCAATACCTTTGCATTTTGTGATAAGTCCCTTTTTTAACCC  
TGACAAGGAGCGTCTGGTCTGGGGTATTCGTGGGATTGAGGTTTCTAGGGGACAGCCCTT  
AGGTATTGGTGTAACAGGGAACCTTTTTTTAATAAGTTTGATGATGCTGAAAATCCCTA  
CAATGGTATAAAACAAAATAACATTACTGACCAAGGTTTCAGACTCAAGGTTGAGCATTGC  
ATTTGACCTAAGCAAACACAGCTGCTGATAGTAGGTGCTAAACCTGCAAAGGTTGAGTA  
CTGGGACGTTGCTGCAACATGTGAAAACCTCCACTGACCAAAGCAGATGACAAATGTCC  
TGCTCTAGAGCTTAAGTCCTCATACATTGAGGATGCAGACATGAGTGACATAGGCCTGGG  
AAACTTGAATTTTTCTACACTGCAGAGAAACAAATCCGATGCCCCATTAGATATTGTGGA  
TTCTATCTGCAAATATCCTGACTACCTGCAAATGATAGAAGAATAATATGGAGACCACAT  
GTTTTTCTATGTGCGGCGTGAAGCTCTGTATGCTAGGCATATAATGCAACACGCGGGCAA  
GATGGATGCTGAGCAATTTCCCACTTCTCTGTACATAGACTCCTCTGTAGAAGGTGAGAA  
ATTAAATTCCCTTGACGCGCACTGATAGGTATTTTCATGACACCCAGCGGCTCCCTGGTAGC  
TACTGAGCAGCAGCTGTTTAAACAGGCCCTTTTGGCTGCAGAGATCCCAGGGCCATAACAA  
TGGCATACTGTGGCACAACGAGGCCTTTGTAACATTGGTTGACACTACCAGGGGAACATAA  
CTTTACCATCAGTGTTCCCTGAGGGGGATGCTTCTTCATATAACAATTCTAAGTTTTTTGA  
GTTTTTAAAGGCACACCGAGGAGTTTCAGCTTGCCTTTATTCTACAGCTGTGTAAGGTAGA  
CCTTACCCCTGAGAAATTTGGCTTACATACACACAATGGATCCATCCATTATTGAAGACTG  
GCATTTAGCTGTCACCTCACCTCCCAATTCTGTACTGGAGGATCATTATAGGTACATACT  
GTCCATTGCAACTAAATGTCCCTCTAAGGATGCAGATGATACCTCCACTGACCCATACAA  
AGATCTTAAGTTTTGGGAGGTTGATCTACGGGATCGTATGACAGAGCAATTGGACCAGAC  
TCCCTTGGCAGGAAGTTTTTGTTCAACTGGTATCACTCAGTCATCATCAAATAAGCG  
GGTGTCACGCACTACTGCCCTTACTACCTACAGGCGGCCTACTAAGCGCCGCCGGAA  
GGCTTAAACGAATTGCTGGTATTGTGGTGCGGTGTCCTCGACGGTCCATGTGTCTATCTTA  
TAATCACTTGGTCAGTCCAGGTTACACCATCCATTATCTATTTACTTCGCATGTATTTTC  
TCTGTTATGTTCCCTGTATGGGTTATGAATGTGTTAATAAAATATGTTGGTAACGCTGTGC  
ACGGGTTTTGTTACGTTTCATGTCTCATGATTTGGCACCCCTGTATTCCCGCCGCCGCCCG  
GGGGATCGCAGATATAATCCCCAAACCCAAAGCGTTCCAACATTGGCAAACGTCTCTGGC  
CCCGATACAACCTGAAACGGTCTGTCTTGCCAATAGCCCCATCTGGCGGGGATTCAACTGA  
AACGGTGTGACTGCCAAGTAACATTTTTGTTATTGGAACGCCTCCGGTGCTGGCGGAAG

CGCAAGGATTTAGGCGCGAAGACAGTTTTTATTGCCAAAACCTTTTGGTTGCTGCCAATAG  
CAGGCGTGGTCTCAACGAATTCGTTGCGGCAATAGGTATGTACCATGGTTATGA  
>gi|1491683|emb|X94164.1|\_HumanPapillomavirus\_type\_72\_E6,\_E7,\_E1A,\_E1B,\_E2,\_E4,  
\_L2,\_and\_L1\_genes  
ATTACTAACATAATACATGTAAAAAAGTAAGACAAGACCGAAAACGGTCCGACCGACAT  
AGGTACATATATAAGGGAAGTGTGAAGTCTGCAAGTATGCAATGCCTATGGGACTGCACA  
ATCCAATAATATTTGGTTGCTGTGCAAGGAAATTGAGGTGGACCTAGAAGATTTACGGA  
TTACCTGCATATTTTGCAAAAATGAATTAACAACAGAAGAATTGCTGGCGATTGCAATAA  
AGGAGCTGCAGATTGTGTGGCGGGACAAGTGGCCATTTGGAGTCTGCGCACCATGCCTTG  
CAAGAGCAACTAAAGTGAGGGAGCTACGATACTGGACGTATTCGGGCTACGGACCCACTG  
TGGAACAGGAAACAGGCAATCATTAGCAGAACTATATATAAGGTGCCATGCATGCTGCA  
AACCCTAAGCTGTCTAGGAAAAGGAATATCAGGTGCAGACAGGAATCCACTTCCACAAGA  
TAAGCGGACTGTGGACGGGAAGGTGCTGCCAGTGTAGAGGGGCATGCACGGCCAGGTGGC  
AACCATAAAGGACATTGTCTTCAGGAACTTCTGATGTGGTTGACCTACACTGCAATGA  
GCAGTTACTAGACAGCTCAGAGTCAGAGTCAGAGGATGAGAGGGACGGTGTGGTGTGCA  
GGAGCAACTTGTAGAACAAGCACAGCAGGCCTACGGGGTGGTTACTACCTGTGGCAGGTG  
CTACCGTCCAGTTAGGCTGGTGGTGGAGTGCAGAGACGCAGACGTGAAGGCGCTACAACA  
ACTACTGCTGGACAATTTGTCCATAGTGTGTCCTCGCTGCGCATAAAGGGACATGGCCAAC  
TGCGAAGGTACTGAACGGGGGGATGGGGACGAGGATGCGAATCGCGCGGGCGGATGGTTT  
TTGGTTGAGGCCATAGTGGAGCAAACACAGGGTACCAAGAGTCCAGTGATGAGGACGAA  
AACAGTGAGGACAGGGGAGAAGATCTGGTAGACTTTATAGACACAAGATCCTTAGGGGAT  
GGGCAGGAAGTGCGTTAGATTTGTTGCTGCAACAAAATGCACGGGATGACGCTGCAACC  
GTGCAGGCCCTAAAACGAAAGTATACATGTAGCCCAGCAAGCAGCTCGTGTGTGTCTTTG  
GTGGACAGTGAGTTAAGTCCCCGACTGGACGCCATAAGCATAAACCGGGGACACGACAGG  
GCTAGAAGAAGGCTGTTTGACCAAGACAGTGGCTATGGCCATACGCAGGTGGATATTGGA  
GCACCAGAAAAGCCAGGTATCGGGGGGTACACAGCATACAAAGGGGGGAGGCGGCGCCGTT  
CAGGAAGCGGAAGAGGAGCGTGTGGGGGGGGATGGTGAGGCGCAGTGTAAGTGCACAGACA  
CAGCAAACGCCAGAGAGAGCAGCAGACGTACTAGAAATATTTAAGGTAGTAATTTGCGT  
GTCACATTACTGCATAAATTTAAAGAGCTATTTGGACTAGCATATGGGGATCTGGTAAGA  
CAATTTAAAAGCGATAAATCAATATGTGGGGATTGGGTAGTATGTGCATTTGGGGTATAT  
CATGCAGTGGCAGAGGCAGTAAAGACGTTAATACAACCCATATGTCTGTATGCACATATA  
CAAATACAGACGTGTCAATGGGGGATGGTAATTTTAATGCTGGTGCGGTATAAATGTGGC  
AAGAGTAGGGAGACAGTGGCACACAGCATGAGCACGCTGCTAAATATACCTGAAAAGCAA  
ATGCTTATTGAACCACCAAAAATTAGAAGTGGACCATGTGCCCTATACTGGTATAGAACA  
GCAATGGGAAAATGGCAGCGAGGTGTACGGGGAAACCCAGAATGGATAGTAAGACAAACA  
GTAGTGGGGCATGCAATGCAAGAGACACAGTTTAGCCTTTCTACCTTAGTACAGTGGGCA  
TATGACAATGACATAACAGATGAGAGCGAGCTAGCATATGACTACGCAATGCTAGGTAAT  
GAGGACCCAAAATGCAGCAGCATTTTTTAGCAAGCAACTGCCAGGCAAGTATATTAAGGAT  
GCAATTACAATGTGCAACATTATAAACGTGCAGAACAGGCACGAATGTCTATGACACAG  
TGGATAGCACATAGGGGGCGCAAGGTGGCAGATTCAGGTGACTGAGAGAAAATAGTAAAAT  
ATTTAAGATATCAAAGGGTTGAATTTGTAACATTTATGGGAGCATTAAAGCTATTTTTAA  
AAGGGGTACCAAAAAAAGCTGTATGGTATTCATGGGCCAAGTGACACCGGAAAGTCAT  
TGTTTTGTATGAGTTTACTTAAGTATTTAGGGGGAGCAGTAATTTTCATATGTAAATTCAG  
GAAGCCATTTTGGTTATCACCCTGGTAGACGCCAAAGTAGGGTTGTTAGATGATGCAA  
CATACCAGTGCTGGCAATATATAGATACATACCTACGAACAGTGTTAGATGGAAATGCTA  
TAAGCATAGATAGAAAACATAGAAATTTAACACAGTTGAAGTGTCCACCACTTATGATAA  
CAACAAATATAAATCCATTGGAAGACCAGGCATTTAAATATTTGCACAGTAGAATAGTGT  
TGTTTTAAATTTATGCATAAGTGGCCATTAAGCAACGGTGATCCCGTATATACCCATA  
ATAATGAAAATTGGAATCGTTTTTCCAAAGGTCCTGGGCACGTATAGAGGGACCTGACG  
AACAGGAGGAGGAGGATGAGGATGGAAGCACTAGCCGACCGTTAGATGCGTGCCAG  
GAGAAATTGCTAGACCTTTATGAAAAAGATACGACAAGCTTGAGGACCAAAATATTGCAT  
TGGCACTATGTGCGTCTGGAACATGCAATGTTATTTAAGGCACGACAAGCAGGACTTACC  
CATGTAGGCCACCAGGTGGTACCAACACTTAGTGTTACAAAAGGCAAGCACATCAGGCA  
ATTGAAGTGACCTGTCACTGCAAGGGTTGCAAAACAGTGCGTATGCGCAAGAACCATGG  
ACATTACAGAACACCTCACTGGAAATGTGGAATGCACACCCACAACGGTGTTGGAAGAAA

AAAGGACGCACAATAACAGTTAAATTTGATTGCGAGGACCTAAAAGCAGTGGAGTATGTG  
AGCTGGGGGTGTATTTATGTGCAAAGTACAGAGGACGAACAGTGGTATAAAGTACAAGGA  
CATGTGTCATATCATGGGCTATATTATGAATTTTCAGGGTCAGAAACAGTACTATGTAACA  
TTTGGACACGAAGCCAGAAAATATGGGGACACAAACACATGGGAGGTACATGTGGGAAGT  
ACAGTGATTTATGAACCCTGCGCCTCTGTATCTAGCACCCAGGACACCGTGCGAGAAGTA  
CCCCTGTTGAACTGTTGGGCGACTGCCAGACGCCACCAAATCCACCGCCACCGCCACG  
TGCGTGGGCCCCGCCAGACATCCTCCTCAGTGCAGACGCCGCCTTGTAAGCGACAGCGA  
CTCCACAGAGACGGATTGCAGCAGCAGCCCCGACTCTACGGAAAGAGACATCTGCAGGCAA  
CGGCGTGACAGTGCTGACCAGTGGGTCAACCGTGACAGTGACTGCACACAACAAGCAAGG  
GACATCTGTAACAGTCACGGTGACCTATAATACATTTAAAAGGTGAACCAAATAAGTTA  
AAGTGTTCGGTATAGGCTTCAGCAGTCAGTGCCTAACTTGTTTTTAAAAGCATCCTCT  
ACATGGCATTGGGCCTGTGGGGGTGACACAACAAAATGTGCATTTGTAACACTGTGGTAT  
GTGGATACTGACCAACGGACACAATTTTTAAGTCGTGTGAACATTCCAAAGGGGATACAA  
GCCACTGCTGGCTATATGTCAATGTGTATATAATGTTTGTGCGATGGCAACCAGTGTAT  
AGAACCACACCTGCAACATTATGTAAGGCAGAAGCAATCCTGGATATACTTGTGTGTTTG  
ATATCTGGGTGGTGTACTGTGCTGTTGCTGCTTATTATTTTCTGGCTTCTCTATCTTTCT  
GCACTAAGTGCTTTTTTGGTGTGTGTGTGTGTATATATCTAGGATTGTTTGTATATAT  
ATGCAGGTGATGTGGTACATAGGTGACTTATAATCCACCCAGCCATTACATGCTGCTATT  
GTGTAAATAGTGTTCCCTTGTGTATCTGTATGTAATATGTATCCTGTTGTAGTGGGCAAT  
ACGGATGGGGTGCAATTAATTGTACTACGAGACGATAATTGTGGATTGTGGTCTTCTCTTG  
TGTATGTTAATAATCATTTGTAGTGTTGCTATATAGGTTGCTACACTGATCCCTTCCTTTT  
GTGTATTCCCACTCCTTTTTATTTTTGTTTTGTTTTGTTTTGTTTTTATTTTTTGC  
ATTTTTTATAATAAACATTATCTGCCAAAATGACCCAAGCTGTAAGGCGTCGCAAACGTGC  
CTCTGCAACGGACCTGTATCGCACATGCAAACAGGCGGGTACCTGCCCTCCTGATGTTAT  
ACCAAAGGTGGAGGGTGACACCCTTGCTGATAGGTTCCCTGAAGTGGGCCAGTTTAGGGGT  
GTTCTTTGGTGGGTTAGGCATAGGCACGGGTTCAGGCACCGGTGGGCGCACTGGCTATGT  
GCCTATAGGTACTCGCCCTCCCCTGTTGTGGATATAGGCCCTACAACACGCCCCGCTGT  
TGTTATTGAGCCCGTGGGGGCGCAGACCCCTCCATAGTCACCCCTGTGGAAGAATCCAG  
CGTTGTGGAAGCCGGTGCCACCGTTCCCCTTTACTGGGTCTGGTGGCTTTGAGGTTAC  
CACGTCTCACTACTACCCCTGCTGTTTTAGACATTACACCCTCTGGAGCGTCTGTCCA  
AGTTAGCAGTAGTAGCTTTACAAATCCCTTATTTACTGAACCGTCCATTATTGAACCTCC  
ACAGGCCGGGGACCTTTACAGGCATGTATTCCTAGCAGACACCCACATCTGGGTGCGATAG  
CTTTGAGGAAATACCCATGCACACATTTGCAACTCATAGCAGTACTAGCACAGACCCCTT  
TAGTAGTACCCCTTTGCCTGGTGTTCGTCGCCTTGACAGCCCCGCTTAGGATTGTATAG  
CAAGGCTAATCAACAGGTTAGGGTTACTAACCCCTGCCTTTTTGTCTCGACCCCAGTCTCT  
TGTTACTTATGACAACCCTGTGTATGATCCAGAGGAACTATTATTTTTGAGCATCCTAG  
TATATATACCCCTCCTGATCCTGACTTTTTTGATATTATTTCTTACATAGGCCTGCCCT  
TACAGCCCCGCCAGGGTACAGTACGGGTGACCCGGTTGGGTCAACGTGCTACCTTGCGTAC  
ACGTAGTGGCAAACGCATTGGGCGCTCGGGTACACTTTTATCAGGACATTAGCCCCATTTT  
ATCTGATACTATTGAAATGCAATCCTTGCCCTCCTCTACGCAGCCAGACATAACATATGA  
CATTTATGCTGACCCCTGATTTAGGGGAACCCCCGCCGCGTGCTTCTGTGTCTTCTACATC  
ATTGCACAGCCCGTCCCTGTCTGCAGCGTCTGCTGTTTCTGCCAAGTATGACAATGTAAC  
AGTTCCCTTGTCCTTAGGGCCACACATCCCTGCCCTCCTCTGGCCCTGACATTGATTTGTC  
CTTTGCTCCTGCCCTGTACCTACAATGCCCTCTGTACCTCTACGCATCCACATTCTAT  
TTATGTTGAGGGCTTTGATTTTTATTTGTTGCCCTGCATATATCTTTTTTCTTAAACGTCG  
TAAACGTGTGCCCTATTCTTTTGCAGATGGCTTTGTGGCGGCCTGGTGACGGCAAGGTAT  
ACCTGCCTCCCAATCCTGTTTCTAAGGTTCTCAGTACTGATCGCTATGTCCAACGCACCA  
ACCTCTATTATTATGGTGGCAGTTCTCGTCTACTAAGTGTAGGACATCCTTACTGTGCCA  
TACCTCTCAACGGACAGGGCAAAAAAACACCAATTCCTAAGGTTTCGGGGTATCAATACA  
GGGTGTTTATAGAGTAAAACCTTCTGATCCCAATAAATTTGCTTTGCCTGATGGCACACTTT  
ACAATCCAGATACCTGAACGGCTGGTATGGGCCTGTGCTGGCATTGAGGTTGGTAGGGGCC  
AGCCCCCTTGGTGTGGCACTAGCGGTACCCCTTGTATAATCGCTTGGATGACACTGAAA  
ACACTTCCTTACTTGTGGCTGACAATTCTGACAGTCGGGACAATGTATCTGTTGACTACA  
AACAGACCCAATTGCTTATTATAGGGTGCAAGCCTCCCATTTGGTGAGCATTGGACCAAGG  
GCACTCCTTGTGCAGGCTCTAATTCTCAGCCAACCTGACTGCCCCCCTTTAGAATTTACAA

ATTCCACTATACAGGATGGTGACATGGTGGAACAGGCTATGGTGCCATAGATTTTGCTA  
CCCTTCAGGAAAATAAATCAGAAGTGCCCTTGGATATTTGCACCACCACCTGCAAATATC  
CTGACTATTTGCAAATGGCTGCTGAACCATATGGTGATTGTATGTTTTTTGTCTTCGCA  
GGGAACAAATGTTTGCACGCCATTTTTTTAATAGGCAGGGCACAATGGGTGAGGCACTAC  
CAGCCAGTTTATATCTTAAAGGTGCCTCGGGTAGCGACAGGGTGACACCTGGTAGTTATA  
TTTATTCTCCCACCCCCAGCGGCTCTATGGTGTCCTCTGATGCACAATTATTTAATAAGC  
CCTATTGGCTACAGCGCGCCAGGGTCACAACAATGGCATCTGTTGGTTTAAATGAGCTTT  
TTGTGACAGTTGTAGATACTACTCGCAGTACTAATGTAACATTTTGTACTGCCACAGCGT  
CCTCTGTATCAGAATATACAGCTTCTAATTTTTCGTGAGTATCTTCGCCACACTGAGGAAT  
TTGATTTGCAGTTTATATTTCAACTGTGTAATAATCACTTAACTCCTGAAATTATGGCCT  
ACTTGACAATATGAATAAGGCCTTATTGGATGACTGGAATTTTGGTGTGGTGCCTCCTC  
CTTCTACCAGTTTGGATGATACCTATAGGTTTTTGCAGTCTCGTGCCATTACCTGTCAA  
AGGGGGCTGCCACCCCTCCTCCTAAAGAAGATCCATATGCTAACTTATCCTTTTGGACTG  
TGGATTTAAAGGACAAATTTTCCACTGACTTGGATCAGTTTCCTTTAGGGCGCAAGTTTC  
TGTTACAGGTTGGTTCTAGGGCTGTTTCAGTGTACGCAAACGTGCTGCCCCACCAAGCT  
CTACCTCGACCCCCGCCCTACTAAACGTAAAAAGCGCAAAAAGTAACATGTCATACTGT  
TTGTGTGGTGTATGTGTGTATGTGTGCAATGCATGCATGTGTGTTTCTGTTGTTGTTGT  
GTGTACATGTTGTACTATGTTATGTTGTTGTATGTTTTTGTATGGCCCCGTGCCCCGT  
GTTGTGTATGTATGTGGAATGTGTGTTATGTGTTGTGCATTAATAAAGCGTGTGTCACTGT  
GTGTGTGTGTGTCGGTGAACCCGTGTGAGTAAAGTGTGTGTTTGCAGTGTCTACTTCC  
TACACTTTGTTTTGTGTACCTTTGTATGCCCTTTACTGTACTCCATTTTATATTTTCTC  
CATTTTGTATTTCGCGACCGTTTTTCGGTCTCCCGCCTTTTCGGTCTGGCGCCGTGCCACT  
GTACATAGAAAATATGCATTGTGCTTTTCCCTCCACATCCTGTTTCAACAAACCTTATCCA  
CATCTGGGTGTGCCTGACAGGTTTCTGGCACATACATTTTCCATAGTTATGTGTTTCCTG  
ACTCATTTTACAATAGATATGCTTTTAGGCACATATTTTATGCTGACTACTTCTCCTAA  
TTGCTGTTTTGGCTACCTTTCTAGGTGTTGTAGCCAAGTATGTGTCTTGCAACTATGGGC  
AAGCCCTTTACAAACGTGTTAAACATTCTACTCCGGTCGCTCCCCTATGTCTCATGGTT  
TTATAGTT

>gi|71726694|gb|DQ080080.1|\_HumanPapillomavirus\_type\_97,\_complete\_genome

ATGGCGCGATTTGAAGATCCAAGCAAACGGCCCTACAAGTTGCCAGACCTGTGCACAGAA  
TTGAATACTTCATTACCTGAAATAGAGATAAGCTGTGTATATTGCAAAACAACCTTGGA  
CGCACAGAGGTATATGAATTTGCATTTAAGGATTTATTTGTAGTGTATAGAGACTGTATA  
GCATATGCTGCATGTACTAAATGTTTAACTTTTTTTCTAAAATTAGAGAATTACGATAT  
TATTCACATTCAAGTGTATGGAGATACATTAGAAAAAATTACTAATACTGGATTATACAAT  
TTGTTAATAAGGTGTTTGCAGTGCCAGAAACCGTTGAATCCAGCAGACAAATATAAACAT  
CTTAAAGACAAACGACGATTCCACCACATATCTGGTTATTATAGAGGCCAGTGCAATTCTG  
TGTTACAACCAATCACGGCAAGAAAGGCTTTCCAGACGTAGAGAAACACAAGTATAATAA  
TAAGTATGCATGGACCGAAACCAACATTACAAGAAATTATATTGCATTTGCAACCCCAA  
ATGAAATAAATTCGGCTGACCTTCAATGTTATGAGCACCTAAGTGACTTAGAGGAAGAAT  
ACGATGAAACAGATGATGTTAATCATCGACAACCTACCAGCCCGACGAGCTGAACCACAGC  
GTCACACAATTGTGTGTATGTGTTGTAAATGTGAGAGCAGACTTCAGTTTGTGGTAGAAA  
GCTCCGCCGACGACCTGCGGTCACTGCAGCAGCTGTTTTTGTAGCACCTGTCTTTGTGT  
GTCCTTGGTGTGCAACCCACCAGTAATCTACAATGGAAGATTACAAAGGTACAGACGGGG  
AGGGTACGGGATGTAATGGCTGGTTTTATGTACAAGCAATAGTAAACAAAAAACAGGAG  
ATATAATATCAGAGGATGAGGATGAAAATGCAACAGACACAGGGTCGGATATGGTAGATT  
TTATTGATACACAATTAATATTTGTGAGCAGGCAGAGCTAGAGACAGCACAAGCATTGT  
TCCATGCGCAGGAAGTAGACAATGATGCACAGGTGTTGCATGTTTTAAACGAAAGTATG  
GAACAGAAAGTAAAGAAAACAGCCCATAGGGGAGCAGCCAGGTGTGGATACAGATTTAA  
GTCCACGATTACAAGAAATCATTAATAAGTGGGCAGAAAAAAGCAAAACGACGTCTGT  
TTCAGATAGCAGACAGTGGCTATGGCTGTTCTGAAGTGGAAGCGGCAGAGACTCAGGTAA  
CCGTAAACACAAATATAAATAGAGAACATGGCGGCAGTTTATGTAGTAGTGGAGTAGTA  
GTGGGTGTATGGATGGTAATCATGATAATAGTAATATAGAAAATGAAAATCCACAATTAG  
TAATTGCAGAAATTAAGACCTATTAAAGGCAAATAATAAAAAAGCTGCAATGTTAGCTG  
TATTTAAAGAAACATATGGGCTATCATTTGCAGATTTAGTAAGAACGTTTAAAGTGATA  
AAACAACGTGTACAGATTGGGTTACAGCTATATTTGGAGTAAATCCAACAATTGCAGAAG

GATTTAAAACGTTAATACAGCCATGTACATTATATGCTCACATTCAATGTTTAGACTGTA  
AATGGGGAGTATTAATATTAGCATTATTGCGCTATAAATGTGGAAAAAATAGACTAACAG  
TTGCAAAAGGATTAAGTACATTATTGCACGTACCTGAAACCTGTATGTTAATTGAACCAC  
CAAAGCTGCGAAGTAGCGTTGCAGCATTATATTGGTATAGAACAGGAATATCTAATATTA  
GTGAAGTAATAGGAGACACACCTGAGTGGATACAAAGACTTACAATTATACAGCATGGTG  
TAGATGATAGTATTTTTTGATTTATCAGAAATGATACAATGGGCATTTGATAACGACTTTA  
CAGACGAAAGTGATATAGCATATGAATATGCTCAATTAGCAGATTGCAATAGCAATGCAG  
CTGCATTTTTTAAAAAGTAATTGCCAAGCCAAAATATTTAAGAGATTGTGCAGTTATGTGCA  
GACATTATAAACGAGCCCCAAAAGCGCCAAAATGAATATGTCACAGTGGATTAAATATAGAT  
GTTCAAAAAATAGACGAAGGAGGGGACTGGAGGCCAATAGTACAATTTTTTAAGATTTCAAG  
GAATAGAATTTATTACCTTTTTTGGGAGCACTGAAAGCTTTTTTAAAGGGAACACCTAAAA  
AAAACGTATAGTAATACATGGACCAGCAAAATACAGGTAAATCATATTTTGGAATGAGCT  
TTATACATTTTATACAAGGTGCAATAATATCATTTGTAAATTCAAATAGCCATTTTTTGGT  
TAGAACCGTTAGCGGATGCCAAGGTAGCCATGTTGGATGATGCAACAAACACATGTTGGA  
CATATTTTGATAACTATATGAGAAATGCTTTAGATGGAAATCCTATAAGTATAGATAGAA  
AGCACAAGCCATTACTACAGTTAAAATGTCCGCCTATATTATTAACCTCAAATATTAATC  
CAGCTATAGATAACAGATGGCCATATTTAGAAAGTAGAGTGACAGTGTTCATTTCCAA  
ATGCAATTTCCATTTGATAAGAATGGTAATCCAGTGTATGAAATAAATGACAAAAATTGGA  
AATGTTTTTTTGAAGGACATGGTCCAGATTAGATTTGCAAGAGGAAGATGACGATGCAG  
ACACCGAAGGAACACTTTTCGGAACGTTTAAGTGTGTTACAGGACAAAATCCTAGACCAC  
TATGAAAAATGACAGTAAAGACATACATAGCCAAATTAATTATTGGCAACTTATACGTTTG  
GAAAATGCAATATTCCTTTGCAGCAAGGGAACATGGTATACAGACATTAACCACCAGGTG  
GTGCCAGCCTTTAACATTTCAAAAAACAAAGCATATAAAGCAATTGAACTGCAGATGGCC  
CTAAAGGGCCTTGCACAAAGTCAGTATAACACAGAGGAATGGACACTGCAAGATACATGC  
GAGGAACTGTGGAATACAGAGCCTACACAGTGTTTTTAAAAAAGTGGGCAAACAGTGGAA  
GTATATTATGACTGCAACAAAGACAACCTGTATGTCTTATGTAGCATGGAAATGTGTGTAC  
TATATGACTGAGGCAGGAACATGGGATAAAACAGAAGCATGTGTAAGTCACTGGGGACTC  
TATTATATGAAAGAAGGAATGAAAACATTTTATGTGCAATTTGAACATGAAAGTAAAAAA  
TATGGTAACAGTAATAAGTGGGAAGTGCATTTTGGGGCGTTGTAATTGATTGTAATGAC  
TCTATGTGCAGTACCAGTGACGAAGTATCCGCTACTCAGATTGTTAGACCACTACAACAC  
GCCTCCACGTCCTACACCAAAGCCCCGTCGTTGGGCCCCGCAAAAACCCAAACGCCGGCT  
ACTAAACGACCTGGACAGTGTGGACTTCCGGAGCAACACAGTGGACGTGTCACCAACCAC  
GTGCACAACCCACTACTCTGTGCAACTACATCTGGAAGCAACAAACGACGGAAGTTGTGT  
AGTGGTAACACTACGCCTATAATACACTTAAAAGGTGATAAAAACAGTTTAAAATGTTTG  
CGGTATCGATTTAAAAAATATAATCAATACTATAGTTCTATATCATCAACCTGGCATTGG  
ACAGATTCTGTAAATAAAAAAGCTGGTATATTAAGTGTATGTATGATAGTGAGCATCAA  
CGAACCAAATTTTTGGATAGTGTTCTTATTCCTAACAGTGTACAAATATTGGTGGGATAC  
ATGACAATGTAATATGTATATTGTATACAATGTGGTAAACAAATGTTAACATTTGTGTTT  
ATATTTTGCTTTTGTGTGTGCCTTTATGTGTGTTGCAGTGTCCCGCTTTTGCAATCTGTT  
TATGTTTGTGCGTTTGCATGGCTGTTGGTGTTTTTGTTTATTGTGGTTATAACAACCCCT  
GTAAGTGCATTTACAGCATATGTATGTTTTTTTTTATTGCCTATGTTTTTATTACACATA  
CATGCTAGATATACATAACATTACTTGTATATACTGTATTGTACAGTATCTTTTGTATTG  
CATAGTTTTTTTATACTTGTTTTGTATTATGTTTACTGTTGTAATAAAATATGGTATCCC  
ACCGTGCAGCTCGACGCAAACGGGCCTCTGCAACTGATTTATATAAAACATGTAAACAAT  
CTGGCACATGTCCGCCTGATGTTATTAACAAAGTAGAAGGTACTACATTGGCAGATAAAA  
TTTTACAGTGGTCCAGCCTTGGTATATTTTTGGGTGGTCTTGGGATAGGTACTGGTAGTG  
GTACTGGGGGTCGTACAGGTATATTCCTTTAGGTGGGCGTCCTAATACTGTTGTGGATG  
TAGGTCCCACTCGTCCCTCTGTAATTATTGAACCTGTAGGCCCTACTGACCCCTTCCATTG  
TTACCTTGGTGGAGGAGTCAAGTGTGGTTACATCTGGTGCGCCTGTTCCAACATTTACTG  
GCACATCTGGGTTTGAATAACATCTTCTGTACTACTACACCTGCTGTGTTAGACATAA  
CACCTACTTCTGGGTCTGTTTCTATTTCTACAACCAATTTTACCAATCCAGCATTTTCAG  
ACCCTTCACTTATAGAGGTACCTCAAACCGGGGAGGTATCAGGTAATATATTTGTTGGTA  
CACCAACGTCAGGAACACATGGATATGAAGAAATACCTTTGCAAAACATTTGCATCTCATG  
GGTCAGGTAATGAACCAATTAGTAGTACCCCATTTGCCTAATATTAGGCGTGTGGCAGGTC  
CCCGCCTTTATAGTAAGGCTAATCAACAGGTTCTGTGTCTACTTCACAGTTTTTAAACAC



ATCCCTCCTCTTTAATTACATATGACAACCCTGCCTTTAATCCTATTGACTCTACATTAA  
CATTTGAACCTACTAGTAATGTTCCCGATTCTGATTTTATGGACATTATTCGTTTACATA  
GACCTGCTTTAACATCCAGGCGTGGTACTGTTAGGTATAGTAGATTAGGTCAAAGGGCAA  
CTATGTTTACTCGTAGTGGCAAACAAATAGGTGCTAGGGTACATTTTTATCATGACTTAA  
GCCCTATCTCTGCTACAGAAAATATTGAAATGCAGCCTTTAATTTCTGCAACAGACGACA  
GCAACTTATTTGATGTTTATGCTGACATTCCCTACTACATCTGACACTAGTGTTACTGCTA  
ACACAGCATTTACATACCCTAAATACTATTCTACTGTATCGTCAGTCTCTTCTTATGGTA  
ACCTTACTGTTCTTTAACTTCCTCATGGGATGTGCCTGTATATACAGGCCAGATATTG  
TATTACCTTCTAGTACTTCTGTATGGCCTTTTATAACACCTACATCTACGTCCACGACAC  
ACTATATAGGTATAAATGGTACGCATTACTATTTATGGCCCTTATATTATTTTCTTCCTA  
AAAAACGTAAACGTGTTCCCTATTTTTTTGTCAGATGGCTTACTGGCGGCCTAGTGACAGT  
ACGTTTATCTGCCACCTCCTTCTGTGTCCAGAGTTGTCAACACTGATGATTATGTGTCT  
CGCACAAGCATATTTTATCATGCTGGCAGTTCTAGATTATTAGCTGTAGGCAATCCTTAT  
TTTAAAGTTTCTAAAGGTGCAGGTAGTAGGCAAGATGTTCCCAAAGTATCTGCCTACCAA  
TATAGAGTGTTTAGGGTAACCTTTGCCAGACCCTAATAAATTTGGGTACCTGACTCTACT  
ATTTACAATCCCGAAACACAACGTCTTGTGTGGGCCTGTGTTGGTGTGAAATAGGCCGT  
GGACAACCTTTAGGTATTGGCCTAAGTGGCCATCCTTTATATAACAAATTAGATGACACT  
GAAAGTTCACATGCTGCTACAGCTGTTGTTACACAGGATGTTAGAGATAATGTATCAGTA  
GATTAAACAAACACAGTTATGTATACTAGGTTGTGTACCTGCTATTGGTGAACATTGG  
GCTAAAGGTACACCATGTAATCTACTACATACAGCAAGGTGACTGTCCTCCTTTAGAG  
CTTAAAAATACAGTGTGAGGATGGCGATATGGTAGATACAGGTTATGGTGCCATGGAC  
TTTAGTACATTACAGGATACTAAATGTGAAGTGCCATTAGACATTTGTCAATCTATTTGT  
AAATATCCTGATTATTTACAAATGTCTAATGATCCATATGGCGATTCTATGTTTTTTTGT  
TTACGGCGTGAACAACCTGTTTGCTAGGCATTTTTTGGAACAGAGCTGGAACAATGGGTGAC  
ACTATTCCACAGGAGTTATATATTAAGGAACGGTATGCGTGAAACTCCTGGCAGTTTT  
GTATATTCTCCGTCTCCAGTGGCTCTATTATTAACACAGAATCACAGTTGTTTAATAAG  
CCATATTGGTTGCATAGGGCCCAGGGCCATAACAATGGTATTTGTTGGCATAATCAATTA  
TTTGTTACTGTGGTGGACACAACACGCAGTACTAATTTAACACTGTGTGCTTCTACACAA  
AATGGCGTAGCTACCACATATGACCCTACAAAATATAAACAGTATAGTAGACATGTGGAA  
GAGTATGATTTACAGTTTATTTTTCAATTGTGTACTATTACTTTATCTGCAGATGTAATG  
TCTTATATACATAGTATGAATAGCAGTATTTTGGAAAACCTGGAATTTTGGTGTCCCACCG  
CCACCCACTACCAGTTTAGTAGATACATATCGCTTTGTACAGTCTGTTGCTATAACCTGT  
CAAAAGGATACTACTCCCGCTGAGAAAAAGGATCCTTATGATAACTTAAAAATTTTGGAA  
GTAGATTTAAAAGAAAGGTTTTTCATTAGATTTAGATCAATATCCTCCTGGACGCAAATTT  
TTAGTTCAATCTGGATTACGTGCTAGGCCTACCATAGGACCCCGCAAACGTTCTGCCCCG  
TCTGCCCCCTACTACTTCCAAACCTGCTAAGCGTTTACGTGTCCGTCGTAAAAAATAGTAT  
GTATGTATCTATGTTTATGTTTGTGTATGTATGTATGTGTGCATTTTAGCATGTATGTAT  
GTTATTTGTATGTTGTTGTACATCCTTGTATGTGTTATGTGGTATTAAATAAAATATGTT  
TGGTAGTTTCTGTATGGTTGCACCCTGGTGAGTAACAAATAGTGTGTTGTGTTTCGTGGTA  
TGAGTGTATTAATTTATTTACTTTTATATTTTACATTTTAAAGTACCATCCATTTTATAT  
TACAATTCTCCATTTTAATGTGCAACCGTTTTCGGTTGCCCTTGGCTTACCTTTGTACAT  
TCTGGCACTGTTGCAAACATTACCTTTGTAGATTCTGGCACTGTTGCAAACATTAATCTT  
AAATACATTACTGTACTGGCACTATTGCAAATGTTAATCTCACATACAATAGTCATACAT  
ATTTTCCACCTGGCACGTATTTTGGCGCACACTTTGGCGCACCTGGTATTAGTCATTTT  
CCTGTCCAGGTGCACTACAACAATTACTTCCACATTTGCATTTACGCCCTCTTTAATAAA  
AATGCTTTTAGGCACATAGTTTTGTAGTTTGTACTTGTACTACTTGTATTATTGGCCTG  
TGCAACTACTTTTACATCCAACAATCTGTCTACTCTTCTATAAAGTATAAAATGACTCA  
GTTATGTATACATAGGTAGTACCAACCGAAAAAGGTTGGGCAGTACAACCCATACTTTTCA  
TTAATACTTTTAAACAATAATGTTATATAAAAAATGGGTGTAACCGAAAACGGTTGCAACCG  
AAACTGGTGTATATAAAAGACCTGCAAAAATGTGCACTACAGG

>gi|22095322|gb|AF436128.1|\_HumanPapillomavirus\_-cand89,\_complete\_genome  
ATGCCCGGACCGCATATCCAAAAACATATTTGTGTTGTGCAAGACTGCGACGTGGAT  
TTAGAGGATCTACGGCTTACATGCATATATTGCACCAAGGAGCTTACAACATCAGAAGTG  
CTGTCCTTTGCACTAAAGGAACCTGGATATAGTGTGGAAGTGGCAGCTGCCCCATGGTGTA  
TGTGCACCGTGCTTAAGTAGAGCCGCCAAGACACGGGAGCTACGACACTGGAACCTATTC

AGCTACCGGAACCAACAGTAGTGGAGCAGGAGACCAACACACCGTTGGCCAGCTGTATATGAGA  
TGCTATATATATGCTGTAAGCCGTTAGGCAGCCAGGAAAAGGACTATATGGTGTATTTTAAAC  
GAGCGATTTTCATAAAATATCTGGAGAGTGGACAGGAAAGTGTTCACACTGCAGGGTAATA  
TGCACGGCCGCACGCCGACCATCCAGGATATAGTTCTGGAAGAACGTCCAGAACCAATTA  
GCCTACAATGTGAGGAAGAAATGCTAGACAGCTCAGATGAGGAAGATGCTAGGGATTGTA  
TGCATGAGCAACAGCAACTGGCAGAACGAGCACAGCAGGCCCTTTAGGGTGGTAACTACGT  
GTGGTGTGTGCTATCGTGCAGTTAGGTTAGTAGTATTGTCTGACGACGCACATCTAAGAC  
ATCTACAACAGCTGCTGCTGAATGACCTGTCCATAGTGTGTCCGGGCTGCGCGTAAGGAC  
ATGGCAGACCACGAAGGTACTAACAGTGGGGACGAAAGCGATGCAGCAACACGGGCGGGG  
GGGTGGTTTTCTGGTAGAGGCCATAGTGGAGAACACAACAGGGGACCAGGTGTCCAGTGA  
GAGGATGAGGATGACACCTGTGTAGATACTGGGGAAGATCTTGTAGACTTTTATAGTAAAT  
GAAAGGCACCCGGGGGATGGGCAGGAAGTGCCGTTAGCACTGTATGTGCACCAAAATGCA  
CAGGATGACGCTGCAGCAGCATGCAGGCATAAAACGAAAGTTTACCTATAGCCCGGCATCTA  
AGTACCGCGTGTCATGGTGTAGATAAGGAATTAAGTCCCCGTTGGATTGCCATAAACCTTA  
AACAGGGGCCACGAAAAAGCCAGGCGACGGTTGTTTGAACGGGACAGTGGGTATGGCAAT  
ACGCAGGTGGATACGGGAGCATCCGAAAGTGAGGTATTGGGGGACACAGACAACACCGGG  
GGGGAGGGCGCTGCGCAGGACGCAGGGGAGGAGGAACGCGGGGGGGGGGATGGGGAAATCA  
CAGCCGCTCTGCAAATTTACAACAGACGCAGGAGGGAAACGCAAGGTGTGCTGGAGCTGCTT  
AAGGCGAGCAACATAAGGGCCACCATACTGAGTAAGTTTAAGGAACTATTTGGACTATCC  
TACTATGACCTTGTAAAGGCAATTTAAAAGTGATAAGTCTACATGTGGGGACTGGGTGTG  
TGTGGCTTTGGGGTGTACCATGCAGTGGCGGAAGCTGTAAAACATTGCTACAGCCACAC  
TGTGTGTATGCACACATACAGCTGCAAACATGTAATTGGGGCATGGTTGTGCTTGCATTA  
GTAAGGTTTTAAATGTGGCAAAAACAGGGAGTCAGTGGCCATTGCATGGCAACACTGTTA  
AATATACCTGCAGGACACATGTTAATAGAACCACCAAAAATACGTAGCGGGCCATGTGCA  
CTATATTGGTATAGAACAGCAATGGGAAATGCAAGCGAAGTCTTTGGGGAAACACCAGAA  
TGGATAGTAAGGCAGACAGTAATAGGGGAGGCAATGAAGGAAACCCAGTTTAGTCTATCA  
ACATTAGTACAATGGGCCTATGACAATGATATTACAGATGAAAGTCAGCTAGCATATGAG  
TATGCACTATTAGGAAAACGAGGACCCAAATGCAGCAGCCCTTTT'TAGCTAGTAATTGCCAA  
GCTAAATATATTAAAGATGCTATAACAATGTGTAAGCATTACAAACGGGCAGAACAGGCA  
CGCATGACAATGGCACAATGGATTAAATATAGAGGCAGCAAAGTACCAGACACAGGCGAC  
TGGAGACATATAGTAAAAATTTCTAAGATACCAAAATGTGGAATTTATTACATTTATGAGT  
GCATTTAAGCACTTCCTAAAGGGCACACCAAAGAAAAGTTGTATGGTGTCTCTATGGGCCA  
AGTGACACAGGGAATCCCTGTTTTGTCATGAGTTTATTGCATTAACCTTACCTTGGGGGAGCAGTA  
ATTTTCATTTGTAAATTCACAGCCATTTTTGGCTGTCCCCGTTGGTGGATGCCAAAGTA  
GGATTGCTAGACGATGCCACAATGCAATGTCTGGACATACATAGATGTATATTTGCGGAGC  
ATATTGGATGGTAAACGCAATAAGTATAGATAGAAAACATAGAAACCTAACACAACCTAAAA  
TGTCCACCCTTAATGATAACCACCAATGTGGACCCCTTAGCAGATGATACATTAATAATAT  
TTAAAAAGTAGAATAGTAGTGTTTAGATTTCTAAACAAATGTCCAATGAACGCAACCGG  
GAGCCAGTATATACATTAAATAATGAAACATGGAAATCATTTTTTCAAAGGTCTTGGGCA  
CGTTTAGACTTACAACCTGAGGAGGAGGAGGAGGAGGAGGAGGAGGAAAATGGCATCGCTAGC  
CGACCGTTTTAGATGCGTGCCAGGAGAGGTTAATAGACCTTTATGAAAAGGATAGCAACAA  
GCTACAGGACCAATTATCACATTGGCAGTACGTGCGTCTGGAATATGCTATTTTATATAA  
AGCACGCCAAGCAGGACTAACAAAGTGTAGGCCACCAGGTGGTGCCACCACCTTAATGTAAC  
CAAAGAAAAGGCCAGTCAGGCCATTACCATACATTTGTTCATTGCAAAGTTTTAAATGCCAG  
TGCATATAAAGATGAACCTTGGACACTGCAGCATACATCACTGGACATGTGGAACGCCCC  
CCCCAAGGGGTGCTGGAAGAAAAAAGGACATACAGTAACCTGTTAAATACGATGGAGAGGA  
CCAAAAGGCCATGGAATATGTTTCTTGGGGTGAAATATACATACAATGTCCAGAAACAGA  
CATGTGGTACAAGGTGGCCGGACATGTGAATGCCACAGGGCTATATTACGAGGTGGAGGG  
CTGTAGACACTACTATGTGAACCTTTACAAAGGAGGCAAAGCACTATGGGGATACAGGCGC  
GTGGGAGGTGCATTGGGGAAGCACTGTTATTTACCATGCATGCGCATCTGTATCTAGTAC  
CCAGGACCTTTGTGCGAGAAGTACCCTCTGCTGCAGTTGGTGACCGGTACACCACCCAC  
CACACCCTTCCCTGCACCGCAGCGGTGTGGCGACCCAGCAGACCCCAAGCTGCAGAC  
GCCGCCTTATAAGTGACAGCAGCATCCACAGAGACGGAGTGCAGCAGCCACCCACGTCAGC  
ACAAAAGCACGTTGGACAGTAGCCACAGGGGGCTCCACAGTAACCCTGACGGCACAGAACG  
ACTCGGGATCGCGCATTTGTTGTAACACTGCACCTGTAATACACCTACAAGGTGAAGCCAA

CAAAC TAA AATG TTTT TAGAT ATAG ATTA AAGCAA ACAGT ACCTG ACCTAT ACCTAC GTGC  
GTCCT CCACAT GGCATT GGGCCT GTGGGG GGGCCACC ACTA AGGCTAC CTTTGT GACACT  
GTGGT ATTCTAG TGTGA ACAACGGGCACA ATTTCT TGCACGTGTGC ATATACCAAAGGG  
TATACAGGCTATGCAAGGTCATATGTCCATGTTTATGTAACCACCTTACATGTAATATTT  
GGTACAGTGTATTGTGTATATACAATGTAAATAATGTTTGTACTGCATAGCTGAGCCTAC  
CATAGTCCTGTGCCACATATATTGTACATTGCAATAGTAACCCTGGATATTATACTACGT  
CTTATATGTTTGTGGAGTGATATACTTGTGCTGCTTATTTGCTTTTGGCTTTCGCATTTG  
CCTGCATTAACAGCTTTCCTTGTGTTGTTGGGTATTGTGTATGTAGGGTTACTACTTCTT  
TATGTGCAAGTATTGTGGTATATAGGACTATAACCACACACCAGCCAATACTGCTGCTAC  
CTGTATATACATCCCATTTGCTTTTATACACATGTTCCCCGTAGAGGTACGCGGTGCGGGGG  
GGGGGTACGACATGGTGGTATTTGACAGACATGATGTTGGGTACTAGGCATATTGTTGT  
TACTTATTGCTCTTGTATTAATTTTGTATACATTTCGTTTGCTACTACATTATTGAACAT  
GCTTTTATAGTGCATTTCCCATACCTGTATTTGGTACACTGCTATAGGATTGTGTTTTATA  
TTTTTATATATACAATAAATACATTGTTGCAATGACCCACCCTGTGCGGCGTCGTAAACG  
GGCTTCGGTCACAGACCTGTATCGCACATGTAAGGCCACAGGCACATGTCCCTCTGATGT  
TATACCTAAGGTAGAGGGCAATACATTGGCTGACAAAATATTGAAATGGGCCAGTCTTGG  
TGTGTTTTTTGGTGGCCTAGGCATTGGCACGTCCCTCTGGCACTGGAGGCCGTACTGGCTA  
TGTGCCCTTGGGTACCCGCCCTCCTACTGTTGTGGATGTAGGCCCTACTGCACGCCCGCC  
TGTGGTAATTGAACCTGTAGGTGCAGGCGAGCCCTCCATTGTTAACCTTGTGGAGGACTC  
TAGCATCTTGTAGTCAGGGGCTGTCTTGCCCAATTTTACAGGCACCGATGGCTTTGAGAT  
TACCACCTGCTCCACTACCACCCCTGCCGTGTTGGACATCACCCCTCAGGTGCTACTGT  
ACAAGTTAGTAGCACCAGTTATAGCAATCCTGCATTTACGAGCCCTCCATTATTGAGCC  
CCCGCAGCATGGCAGTGTCTTGCCCATGTGTTTACTAGTACTCCCACTCGGGGTCCCA  
CACATTTGAGGAAATACCTATGAGCACATTTGCCACCTCTGGGGACGTGGACGCTGGTCC  
TATAAGCAGTACCCAGTACCTGGCGTACGTAGGATTGCAGGGCCTCGCCTTAACCTATA  
TAGTAAGGCCACTCAACAGGTTCTGTATCTGATTCTGCCTTTGTGTCCCGTCCTGCATC  
ATTTGTCACATATGATAATCCTGTGTATGATCCTGAGGAACTATTATATTTGAACATCC  
TGATTTACATGCACCTCCAGATCCTGATTTTCTGGATGTTGTGGCCTTACATCGCCCTGC  
CCTTACGTCTCGCAAAGGCACTGTACGTTTGTAGTCGTGTAGGACAGCGTGCTACCTTAAA  
AACACGTAGTGGCAAACAATAGGGGCGGGGTACACTTTTACCATGATGTAAGTCCCAT  
TTCGGCTGCAGAATCCATTGAGATGCAGCCATTATTACCTTCCCTGACCTTACACAGCC  
TGTGTATGATATATATGCTGACACTACACATTTGGACTCTGTGTTGGCAGAACGCCCCCTT  
TCCCGCCTATTCCTCTGCCAATACCACCTTTTCTGGCCCCGACCGTTACTGCTACATCTGC  
TGTATCGTCTCAATACACAAATGTTACTGTTCCCTTTGTCTCAGGGGTTTGACGTTCCCTGC  
TGTTACAGGGCCTGACATAGCATTTCCCACTGCCCCCTAGTGTCCCCCCCATATTCCCCTC  
ATATACCCCTTGCCCCCTCCACAGGCTATATATATTACGGTACGGATTTTATTTAGTAC  
CCAATTATGTGTTTTTTTCTAAAGGCGTAAACGTGTCCCCTATTCTTTTGCAGATGGCT  
TTGTGGCGGCCCTGGTGACGGCAAGGTATACCTGCCTCCCACTCCTGTGTCCAAAGTTTTA  
AGTACGGACCGCTATGTCCAGCGTACCAACCTGTACTATTATGGAGGCAGCTCCCGCCTT  
ATTACAGTTGGCCACCCTTATTATACTGTACAGGTCAATGGTGCTAACA AAAAGGCCAAC  
ATACCTAAGGTATCAGGGTATCAATACAGGGTATTTAGGGTACGGTTGCCTGATCCAAAT  
AAGTTTGGCCTTCGGGACGCTTCCTTATATAATCCTGACACTGAGCGGCTGGTGTGGGCC  
TGCAGGGGCATTGAGGTGGGCCGGGGTCAGCCCTTGGGGGTTGGTACAAGTGGCCACCCG  
TTATACAACCGTTTGGATGACACTGAAAATGCTTCCTTATTGGTTGCTGCAGATGTTGAC  
AGTAGGGATAATATATCTGTTGACTATAAAACAACACAGCTTCTTATCATTGGCTGTAAG  
CCTCCTATTGGGGAGCACTGGGCCAAGGGTACTGTGTGCTCTAGTGTGTGCCCTCAGCAG  
GGGGATTGCCACCTTTGCAGTTGCTAAATACTACTATTGAGGATGGCGATATGGTGGAA  
ACAGGCTATGGAGCCATGAGCACTTTTCCAAACTGCAGGAATCTAAATCGGAGGTGCCTATT  
GATATTTGTGACTCCACCTGCAGTATCCCGATTATTTGCAAATGGCTGCAGAGCCATAT  
GGGGATTGTATGTTTTTTTTTGTGTTGCGCGGAGCAAATGTTTGCTCGCCACTTTTTTAAT  
AGGCAGGGTGTTATGGGTGAGGACCTGCCAAAACCTTGTATATGCCTGGGTCTGCTGCT  
AATAACAGAAAATACACTTACTAGCTATGTATATGCCCCAACGCCAGTGGGTCTATGGTT  
ACATCTGATTCCCAGTTATTTAATAAGCCTTATTGGCTGCACCGTGCACAGGGCCATAAT  
AATGGTATTTGTTGGTTTAATGAGTTGTTTGTACTGTGGTGGATACCACCCGTAGTACC  
AACCTTACCATTTGTGCTGCTTCCCAGTCTGGCACAGAATACAGTTCTACACGCTTTAAG

GAATATTTAAGACACACTGAGGAATATGACCTACAGTTTATATTCCAACATATGTAAGATA  
CACCTAACGCCTGAGATAATGTCTATTTACACAATATGAATGACACATTGTTAGATGAA  
TGGAACCTTTGGTGTCAATCCCCCTCCCTCCACTAGTTTGGATGATACCTATCGCTTTCTT  
ACCTCTCGGGCCATTACATGTCAAAAGGGCAGTGTGCCCCAGAACCTAAAAAGGATCCA  
TATGATAAGTTATCCTTTTGGGATGTGGATCTTAAGGAACGTTTGTCCACTGATCTAGAC  
CAGTTCCCTTTGGGTGCGAAGTTTTTATTACAATTGGGCGGCCGCCCTCGTCTGTACCT  
CGCAAGCGTGTGCCCCCGTGTCTACCTCCAAAGCCCCCAAACGCAAAAAGGCCAAACGG  
TAATTTTATACTCTGTGTGTTGTGTGTGCTGTATTTGGTTTTTGTATATTATGTTATGTGGT  
GCCCTCTGTGTGTGTATGTATTGTATAACTTATGTATGTATCCCTACTGTTGTGTAGTGT  
GTGTCTCTATGTACCCCTGTGTAGTGTGTGTCTGTATGTAACCCCTATGTACTGTGTG  
TCCTGTATGTAACCCCTATTGCACACATGTGTGTGTATGTATTTATGGAATGTGTGTGTT  
GGTTTGTGCATTAATAAACTATGTGTCACTGTGGCCCTGTGTCCAGCTGCGCCCTATGAG  
ATATGTATTCGGCCATTTCCCTTTCCACCCAGCGTCCATTTTGAGTTCAGCGACCGGTTT  
CGGTCTCCCGCGTTTTTGTTTTTGTATGGCGCCATGCCACTTTACACAAAGACTTGTA  
TCTTTTATACTTCCGTAGGCGGCTACATGTTCCACACCTGGGAGTGCCCTGACATTTA  
TTTGGCTACAAATACATTGTGTGTGTGCACAATTTATGTACTTTTCACTACTCATTTTGCAA  
TAATACTGCTGTTAGGCACATAGTTTTGCTGACTACTTTCCCCTAATTACACTTTTGGCT  
TGAAAACCTGCCCACGCATTTCAACTATGTGTCTTGTAAACCTTGTTTTATTGCTTTTAAA  
CATGTTTTCATGCCATACCCATACCCGCTCGTCCCTATGTGTCTATTCTTTACTTATTATTA  
TATATTACAATCATAAAGACTTAAAAATAAGGAGGGACCGAAATCGGTGCACCGAGATAGG  
TACATATAAAAAGGATTTGGGCAGGAAGCACAGTAGCA

>gi|85827580|gb|DQ344807.1|\_HumanPapillomavirus\_type\_13,\_complete\_genome

GTTTCTAACAACTCTTAAGTTTAAAAAATAGGTGGGACCGAAAACGGTTTTTAACCGAAAAC  
GGTGATATATAAACCAGCCCCAAAATTGAGCAAGCGGGGCATAATGGAAAAGTGCAAATGC  
CTCCACGCCTGCAAAAACGATAGACCAGTTGTGCAAGGAGTGCAACCTTTCTATGCACAG  
CTTGCAAATTTCTATGCGTGTTCTGTCAGGAAAACCTGTCCACGGCAGAGGTTTATTCATT  
TCAGTATAAGAGTTTATATATAGTGTGGCGAGGATCGTTTCCATTTGCGGCTTGTGCATG  
CTGCTTAGAAATACAAGGAAAGATTAACCAGTTTAGGCATTTTGACTTCGCGGGATTTGC  
TGTAACAGTTGAAGAAGACACAAAGCAGTCAATTTTGGATGTGCTAATTCGCTGCTATTT  
ATGCCACAAACCATTGTGTGAAGTGGAGAACTAAGACATATTTTGCAGAAGGCACGATT  
TATTAAATTAAACAGCAGTTGGAAAGGCCGCTGTTTTTCATTGCTGGTCATCATGCATGGA  
CAATATACTACCTTAAAAGACATTGTTTTAGACCTGACTCCTGACCCCTGAGGTCTACAT  
TGCAATGAGCAATTAGACAGCTCAGAAGACGAGGTGGACGAACAAGCCACGCAAGCCACG  
CAACATAGCACACTATTACAATGCTACCAAATACTAACGTCCTGTAGTAAATGTTGTAGC  
AACGTCCGGCTGGTGGTGGAGTGTACAGGACCTGACATTACGACCTACACGACCTACTG  
CTGGGCACGCTGAATATAGTGTGCCCTTTGTGTGCACCAAAAAGCTAACTACGATGGCAG  
AGGATACAGGTACTGATAATGAGGGGACGGGATGCTCAGGATGGTTTTTTAGTAGAGGCTG  
TAGTAGAACAACAACCTGGGCAACAAATATCAGATGATGAGGATGAAACAGTGGAAGATA  
GTGGGTTGGATATGGTGGATTTTATAGATGACAGACCTATTACACACAATTCCTTGGAAG  
CACAGGCATTGTTAAACGAGCAGGAGGCGGATGCTCATTATGCGGCTGTGCAGGACCTAA  
AACGAAAAGTATTTAGGCAGTCCATATGTTAGTCCCCTAGGACATATTGAACAGTCAGTGG  
ACTGTGATATAAGTCCTCGATTGGACGCTATAAAATTAAGTAGAAATTCTAAAAAAGTAA  
AGCGACGGCTGTTTCAATCAAGGGAAATAACGGACAGTGGATATGGCTATTCTGAAGTGG  
AAGCTGGAACGCAGGTAGAGAGAAATGGCGAACCGGAAAATGATTGTGGGGGTGATGGAC  
ACGGAAGGGACAAAGAGGGGGAGGGACAGGTGCACACGGAAGTGCACACAGGCAGCCAGA  
TAGAAGAGCACACAGGGACCACGCGGGTGTAGAATACTTAAATGTAAGGATGTAAGGG  
CTACATTGTATGGTAAGTTTAAAGACTGTTATGGGTTATCATTTACAGATTTAAGTAGAC  
AATTTAAAGTGATAAATCAACATGTGGGACTGGGTGGTTGCGGCATTTGGTATACATC  
ATAGTGATATCAGAGGCATTTGAAAAGTTAATGCAGCCATTAACAACATATATGCATATAC  
AATGGCTTACAAATGCATGGGGGATGGTATTGTTAGTATTAATAAGATTTAAAGTAAATA  
AAAGTAGATGCACAGTGGCGCGAACACTGGCAACCTTTCTTAATATTCTTGAGGACCACA  
TGTTAATTGAACCTCCCAAAATACAAAGCAGTGTGGCAGCATTATACTGGTTTGAACAG  
GTATTTCTAATGCTAGTATAGTAACTGGTGAAACACCAGAATGGATAAAAAGGCAAACAA  
TTGTAGAGCATGGACTTGACAGATAATCAATTTAAATTAAGTAAATGGTGCAGTGGGCAT  
ATGATAATGATTTTTGTGATGAAAGCGAAAATAGCATTTGAATATGCACAACGAGGAGATT

TTGATTCAAATGCCAGGGCATTTTTAAATAGTAATTGTCAGGCCAAAATATGTAAAAGATT  
GTGCAACAATGTGCAAGCATTATAAAAAATGCAGAAATGAAAAAATGTCTATGAAACAAT  
GGATAACATATAGAAGTAAAAAATAGAGGAAGCAGGAAATTGGAAACCAATAGTACAAT  
TTTTAAGGCATCAAATATAGAATTTATTCCATTTTTTAAGTAAATTAATTTGTGGCTTC  
ATGGCACGCCAAAGAAAACTGTATTGCAATAGTGGGGCCACCAGATACAGGCAAATCAT  
GTTTTTGCATGAGCTTAATTAAGTTTTTAGGGGGCACAGTAATTAGTTATGTAAATTCAA  
GTAGCCATTTTTGGCTGCAGCCATTATGTAATGCAAAGGTAGCTTTGCTAGATGATGCAA  
CGCAGTCATGCTGGGTATATATGGACACATACATGAGAAATTTATTAGATGGCAATCCAA  
TGAGCATTGATAGAAAACATAAGTCTTTAGCATTAAATAAATGTCCGCCATTATTAGTAA  
CATCTAATGTAGACATTACCAAAGATGACAAATATAAATATTTGTATAGTAGAGTAACAA  
CACTTACATTTCCAAATCCATTCCCTTTTGACAGAAATGGGAATGCAGTATATGAGTTGT  
CTGATGCAAACTGGAAATGTTTTTTTACAAGATTGTCAGCAAGCCTAGATATACAGGACT  
CTGAGGACGAGGACGATGGAGACAATAGCCAAGCATTTAGATGCGTGCCAGGAACAAGGG  
CGAATTTCGTTTAAACATGTATGAAGAAAATAGTAATGAACTTAAAAAACATATACAACAT  
TGGAATGCTTAAGGTACGAAAGTGTACTTTTACACAAAGCACGCCAAATGGGCCTAAGC  
CACATTGGATTACAAGTGGTGCCACCATTGACAGTATCACAAGCTAAGGGACACGAGGCA  
ATTGAAATGCAATGACTTTAGAGACATTACTAGAGTCTGAGTTTGGTATGGAACCATGG  
ACCTTACAAGATACAAGTCGTGAAATGTGGCTAACACCCCCAAAACGCTGTTTTAAGAAA  
CAGGGACAAACTGTGGAAGTAAAATATGACTGTAATACAGACAATAGAATGGATTATGTG  
TCGTGGACATACATATGTGTTTGACACAGATAAATGGACAAAGGTGAAAGGAATGGTA  
GATTATAAAGGTTGTACTACATACATGGAAATTTGAAAACATATTATATAGAGTTTGAA  
AAGGAGGCTAAAAAATATGGGGAAACGTTACAATGGGAAGTATGTATTGGCAGCACAGTC  
ATATGTTCTCCTGCATCTGTATCTAGTACTGTACAAGAAGTATCCATTGCTGGGCCTGCT  
TCATACTCCACCACCACCTCCACACAGGCCCTCCACCGCAGTGTCTGCGAGCGCCCGGAA  
GAATGTGTGCAAGCGCCGCTTGTAAACGACAACGAGGACCTTCACGTCCCATTGGAAAC  
CCCCAGAACACACAAAGCATTGTGTGTGTCACAGACGACGACACCGTGGACAGTGCAAAC  
AACAACATCAACGTTAACCATTACAACAATAACAAAGGACGGGACAACAGTTACTGTGCA  
GCTACGCCTATAGTTCAATTACAAGGTGACTCTAATTGTCTAAAGTGTTCGATATAGA  
TTACATGAGAAATATAAAAAATTTATTTTTGTTAGCATCATCTACATGGCATTGGACCGCC  
CCTAATAATTCACAAAACATGCACTGGTAACCTTAACCTATGTAAATGAACAACAAAGA  
CAAGACTTTTTAAACACTGTAAAAATACCTGCAACCATAACACATAAACTAGGTTTTATG  
TCATTGCAATTGTTGTAACAGCATATATTGTATGTAAATATTTGTTGTGTGTGTATAT  
ATTGTACATGGAATTTATACCTGTGGATGTTACTACACAGGAAACCAGCAAGTCATTACT  
GCCACTTGTAATTGCACCTTACAGTGTGTGTAGTTAGCATTATAACAATATTGTGGATATC  
AGAGTTTTTGGTGTACACAAACGTTTTAGTACTAACATTAATTTTATATATACTTTTGTG  
GCTTTTACTAACAACCTCCCTTGCAATTCTATTTACTAACCTGTCTCTTTGCTTTCTTCC  
TGCGTTGTGTGTACACCAATATATTTTACAAACACAAGAATAATTATACACAATGTTAAC  
CTGTACTTTTTGATGATGGTGACACATGGTTGCTATTATGGTTAATTTTATCATTTATTGT  
AGCCATTCTAGGGTTACTGTTGCTGTATATAAGAACTGGACATATGCATTGCCAGTGCTG  
GAGTAAATAAGTGGTTTTATATTTTGTGTGTATTCAATTAATTATGGCACATAGTAGGGC  
TCGCAGACGCAAACGCGCTTCAGCTACACAACATATCAAACCTTGTAAGGCTTCTGGAAC  
ATGTCCTCCAGATGTTATACCAAAGGTTGAACAAAACACTCTTGACAGATAAAATATAAA  
GTGGGGCAGTTTAGGAGTATTTTTTGGGGGGCTTGGCATTGGCACAGGCTCTGGTACTGG  
CGGTAGGACTGGCTATGTACCAGTAGGATCCACCCACGCCCCTGCCATATCATCTGGGCC  
TACTGCACGTCTCCTATTGTTGTTGATACTGTTGGGCCTACAGACCCCTTCTATTGTATC  
TTTGGTAGAGGAATCAGCTATTATTAATTCTGGAGTGCCTGACCCTTTGCCTCCGGTTCA  
TGGGGGTTTTGAAATTACCACATCTCAATCAGCCACTCCAGCAATATTGGATGTGTCTGT  
TACAACACAAAACACTACGTCCACAAGTATATTTAGAAATCCTGTTTTTTCAGAACCTTC  
TATTACACAATCTCAACCTCTATTGAAAGTGGTGCACACGTGTTTATATCGCCATCTAC  
TATTTCCCCCTCATTCACAGTAAGACATTCCCTTTAGATACATTTATTGTATCTTCCTCAGA  
TAGTAATCCTGCATCAAGCACCCCTGTTCCAGCAACTGTTGCACGTCCACGTCTAGGCCT  
TTACAGTAGGGCCTTACATCAAGTACAGGTTACTGATCCTGCCTTTTTTTTCGTCGCCCCA  
ACGCTTTATAACCTTTTGATAACCCAACATATGAAGGTGAAGATATAAGTTTGCAGTTTGC  
CCACAATACCATTTCATGAACCCCTGATGAGGCATTTATGGATATTATAAGACTACATAG  
GCCAGCCATAACATCACGGCGTGGTCTTGTTAGGTTTAGTCGAATTGGTCAGAGGGGGTC

TATGTATACTCGAAGCGGCAAGCATATAGGTGGAAGGGTCCATTTCTTTAAGGATATTTCTCCTATATCTGCAGCTGCAGAACAAATAGAATTACACCCCCTTGTGGCTGCTGCACAGGATCACAGTGGTTTGTGGTATTTATGCAGAACCTGACCCTGACCCTGTGGCTGTAAACACCTCTGGGTCATTGTCTTCTGCCTCCACACCATTTGCGCAATCTTCTTTGTCTTCCGCCCCATGGGGTAATACTACTGTTCCCTCTTCTACTACCAGGTGATATATTTATACAGCCTGGTCCTGACATAACATTCCCAACTGCACCTACAGTAACACCTTATAATCCTGTTACGCCTATTTTACCTACAGGTCCTGTTTTTTATTACTGCTTCTGGATTTTATTTATATCCTACATGGTATTTTACACGCAAACGCCGTAAACGTGTTTTCTTGTTTTTTACAGATGTGGCGGCCTAGTGACAACAACTATATGTGCCTCCTCCCGCCCCCTGTATCAAAAGTAATTACTACGGATGCCTATGTTACACGTACCAACATATTTTATCATGTAGCAGTTCTAGACTACTTGCAGTGGGAAATCCTTATTTTCTTATTTAAGAAACAAAACAAAACCTGTTGTCCCTAAGGTATCTGGTTATCAGTTAGGGTATTTAAAGTTGTATTACCTGACCCTAATAAATTTGCCCTGCCTGACACATCTATATTTGACTCAACTAGTCAACGCTTAGTGTGGGCCTGCACAGGTTTAGAGGTTGGTAGGGGTCAACCCCTTAGGTGTTGGTATTAGTGGTCATCCATTATTAAATAAATATGATGATGTGGAATTTCTGCAAGTTATGCTGCCAATCCTGGCCAGGATAATAGGGTTAATGTGGCTATGGACTATAAAACAAACACAGTTATGTTTAGTGGGCTGTGCACCTCCTTTAGGTGAACATTGGGGACAGGGCAAGCAATGTACTGGTGTAAATGTACAACCTGGAGATTGCCCTCCTTTAGAATTAATTAGTAGTGTAAATTCAGGATGGTGACATGGTAGATACAGGATTTGGAGCCATGAATTTGAGGAATTGCAATCTAATAAATCTGATGTGCCACTAGACATATGCACGTCCACATGCAAATATCCTGACTATTTACAAATGGCTGCGGATCCTTATGGAGACAGATTATTTTTTTTATTGCGAAAGGAACAAATGTTTGCAGGCAATTTCTTTAACAGGGCAGGCTCTGTTGGTGAATAATCCCAGCAGAATTATATGTTAAGGGTAGTAATACACTTTCTAATAGTATTTACTATAATACTCCCAGTGGCTCTCTTGTGTCTTCCGAGGCCAGTTGTTTAATAAACCTTATTGGTTACAAAAGGCCAGGGACACAATAATGGTATATGTTGGGGCAATCACTTGTGTGTACTGTAGTTGATACTACACGCAGTACTAACATGACTGTGTGTGCAGCCACTACATCATCTCTTTCAGACACATATAAGGCCACAGAATATAAACAGTACATGCGACATGTAGAAGAATTTGATTTACAATTTATTTTTCAATTGTGCATATTAAATTAAGTGCAGAGGTTATGTCATATATTCATACTATGAATCCTACAATTCTAGAAGACTGGAACCTTTGGGCTATCTCCCCCTCCTAATGGAACATTGGAAGACACATATAGATATGTACAATCTCAGGCCATAACGTGTCAAAAGCCTACACCTGATAAAGAAAACAGGATCCGTATGCGGGTCTTAGTTTTTGGGAGGTTAATCTTAAGGAAAAGTTTTCTAGTGAAGTACATCAGTATCCCCTTGGCAGAAAGTTTTATTACAAACAGGCGTTTCTAGTCTAGGTCACCTATTCGTGTAGGTAGAAAACGTGCTGCATCTACATCTACTGCCACACCTACTACACGTAAAAAGCTAAAAAGGAAATAATAGTTTGTATTATGATTGTGTATGTATGTCAGTTTTGTTTGTACTGTATATATGTTGTGTACTGTATGTGTAATGTTGTAATGTATGTGCATGTTACTTATTAAGAATGTGTGTGTGTGTTTGTATGCAATAAATTTAATCTGTGGTGTCTGTTCCACCCTATGAGTAAGTGGTATGTTGTGTCTCGTGTGTTGTTTTGTATACTATACTATAACAGTAGTGCAACCATTTTGTAACTTTTCTTACATTTTACGTCTCCATATTAAGTGCAACCGATTTTCGGTTGCTATTGTTTTCTGCAACCGATTTGTTGCAGCACGCTGTTTTATATAATCTTACCTACCGCCTGCCAAAATTATCCACCGCTTGCCAAAATCACCCACACCTGGCGTTGCTAGGGCGCGGTTATATATGTTTACTAAATCTTACTAATCTTTCTATCACTCATTTTACCTTTATAACAATACTTTTGCTTTTCAAGTACATTTTCTACTTACTAGCCAATGCCTGAAAGGTTTTTTGGCTACCAGCACTACATTTTGTACAGTTAATGTTACATGTATAAAATGAGTAACCTAAGGTCACACACCTGCAAACCGGTATCGGTTGAAACACACCCTCTATAGTTCCTTATTATA

>gi|71726718|gb|DQ080083.1|\_HumanPapillomavirus\_type\_102,\_complete\_genome

ATGTCAAGTGC GCGCTACCCACCAACATTTTGTGCTGTGCAAAGAATGTGAAGTGGATTGGAGGACTTACGACTGCTTTGCATTTATTGCACAACCTGAAGTACCGCAGCAGAAGTATTGTCCTTTGCAATTAAGGAGCTGTGTATTAAGTGGGACCACGAAGTGCCTACGGAGCCTGTGCACAGTGTTTGTGTGAGCAGCTAAAGTGCGGGAACACGGCAGTGGAACTACTCCAGCTACGGCGCAACGGTTGAAGAAGAAACCCGCACAGCATTACCACAGCTGTATATGAGATGCTATATGTGCTGAAGCCGTTGTGTAGTACGAAAAGGAATATTTGGTGCAAACAGGCATAGGTTTTCATAAAATAGCAGGGGAGTGGACAGGAAAGTGTGCAACTGTAGGGTATCATGCACGGCCACGCAGCAACGATAGCAGATATAGTTTTTAGAAGAATTACCAGATGTAATTGACCTGTATTGTAATGAGCAAGCAATAGACAGCTCAGAGGAGGAGGACGAGAGGGATTGTGTGCGTGACCAACTGGCAGAACAAAGCAAAAGCAGGCCTATAGGGTGGTAACAAAGTGTGGTA

TGTGTGGCCAGTCACTGAGACTGGCAGTGCTGTGCGGAGACACAGACATAAGACGTCTAC  
AGGAGCTTCTGGTGAATGCGGTGGACATAGTGTGTCCCAGCTGCGCATAAGGACATGGCA  
CATGCAGAAGGTACAGATAATGGGGAATTTAATACTACAACAAACGGGGCAGGGGGGTGG  
TTTGTGGTGGAAGCCATAGTTGACAGAACAACAGGGGACCAGGTGTCCAGTGATGAGGAT  
GAGGAGGGAACAGATAATGGGGAAGACCTTGTAGATTTTCATAGAACGATATCCAGGGGAT  
GGGCAGGAAGTTCCGTTAGAGCTGTTTGTACAACAACTGCAAATGATGACGCTGCTGCA  
GTGCAAGCCCTAAAACGAAAGTTTGTAGGTAGTCCCGCATCAAGCTCCTGTGCGACATGG  
GTGGACAGTGAACCTAAGTCCTAGGTTAGACGCCATTAAAATAGATAGGAGACAGGAAAAA  
GCTAGACGAAGGTTGTTTGACCAAGACAGTGGGTATGGCAATACGCAGGTGGAAGCTGGA  
ACATTGGAAGCCAGGTACCAGGGGATAATGGCGTCGCGGGGGGGCAGGTGGCGGCACAG  
GAAATGGGGGAGGAGAACAGGGAGGGGGGGGACGGCGAATGTGAACCGTCTGTGCAGGTA  
CAGCAACAGCAAACGCAGGACAAAGCGCCAGAGCTGCTGGAGCTGTTTAAAGGCAGTAAT  
GTTAGAGCCGCCATATTAAGTAAGTTTAAAGATTTATTTGGGCTATCATTTTATGATTTG  
GTAAGGCAGTTTAAAGTGACAAATCCATATGTGGGGATTGGGTGGTGTGCGCCTTTGGG  
GTGTACTATGCAGTAGCAGAAGCAGTAAAAACATTAATACAGCCGCAGTGTATATATGCA  
CACATACAAATACAAACCAGCCAATGGGGAATGGTTGTGTTGCTACTGGTAAGATTTAAA  
TGTGGCAAAAGTAGAGAAACAGTGGCAAAATATATGGGCACGGTACTAAATGTACCGGAA  
AAGCATATGCTAATTGAACCACCAAAAATACGTAGTGGTCCATGTGCCCTATATTGGTAT  
AGGACAGCCATGGGCAATGTCATGTGAAGTGATTGGGGAAACACCGGAATGGATAGTACGA  
CAAACAGCTGGTAGGGCATGCCATGGGAGAAAACCTCAATTTAGTTTGTCAAGTGCTTGTGCAG  
TGGGCATATGATAATGATATACAGGATGAAAGTGATTTAGCATATGAATATGCAAAATTA  
GGTAATGAAGATGCTAATGCAGCTGCATTTTTAGCCAGCAATTGCCAAGCAAAGTACATA  
AAAGATGCAATGACAATGTGCAGGCTATATAGACGTGCAGAACAGGCCAGAATGAGCATG  
GCACAGTGGATAGTGCACAGAGGACGCAAGGTGGCAGACACGGGGGATTGGAAACATATT  
GTAAAATTCTTAAGATACCAAAGAGTAGAATTTATTACATTTATTAGTGCATTTAAGTTG  
TTTCTAAAAGGGATACCAAAAAAAGCTGCTTAGTATTTTATGGACCTAGTGATACAGGA  
AAATCATTGTTTTGCATGAGTTTATTGCAATACCTAGGGGGCGCAGTAATATCTTTTGTA  
AATTCAAGTAGCCATTTCTGGTTGTCCCCGTTAGCAGATGCAAAAATAGGCCTGTTAGAT  
GATGCAACAGGACAATGCTGGACCTATATTGATGTATACCTGCGTAGCATATTAGATGGA  
AATCCCATAGTATAGACAGAAAACATAGAACACTGACACAACCTAAAATGTCCACCGTTA  
ATGATAACAACCTAATGTAGATCCGTTGGCAGACGAGTCACTAAAATATTTACGTAGCAGA  
ATAACAGTGTTTAAAGTTTATGAATAAATGTCCAGTAACAGCCAGCGGGGAACCAGTGTAT  
ACACTTAATAATGAAACGTGGAAATCATTTTCCAAAGGTCCTGGGCACGTTTAGAATTG  
CATCCAGAGGAGGAGGAGGAGGAGGAGGATGGCATCGCTAGCCGACCGTTTAGATGC  
GTGCCAGGAGATGCTAATAGACCTCTATGAAAAAGATAGCAACAAATTGGAGGACCAGTT  
GTTGCATTGGCAATGTGTGCGTCGGAACATGCAATATTATTTAGGGCAAGAGAAGCAGG  
ACACACCAGTGTAGGCCACCAGGTGGTGCCACCCTTAGTGTAACCAAAACAAAGGCATG  
TCAGGCCATTGCAGTGCACCTATCATTGCAGAGCCTAAATAACAGTGACTTTAAGTATGA  
ACCGTGGACACTACAGGATACATCCATGGACATGTGGAACACACCCCCACAAGGGTGCTG  
GAAGAAAAAAGGATGTACAGTGACAGTTAAATTTGATAACAGTGACTGTAATGAAATGGA  
CTATGTCAGCTGGGGACACATATATGTAAATAAGGAGGACACAGACACATGGTATAAAGT  
GCCAGGCCGCATAGATTATGCGGGGCTGTATTATGAGGTGCAGGGATGCAACATTAATA  
TGTGGCGTTTGCAAAGGAGGCCCTAAAATATGGGACAAAAAACATATGGGAAGTGCATGT  
GGGCAACAATGTTATTCACCAACCATGCGACTCTGTATCTAGCACCCAGGACACCGTGTG  
AGAAGTACCCCTTGCTGCAACTTGTGACAGGCTACCACACGCCGACGAACCCACCACCAG  
CCCCGAGGTGTTGGGCACCACCCAGAGCACCCCAAGTGCAGGCGCCGCTTGTAAAGCG  
ACAGCGACTCTACGGAGACGGAGCAGAGCAGCCCCGACGCCACCGAAAAACAACATCAAAA  
GCGGCTGGACACTAGTACCCACGGATTCTACGGTGACACTGAGTGCCCCAAAACGCCCAAG  
GGACAACAGTGACAGTACAATAACACCTGTAATCCACTTACAAGGTGAAGCCAATAAGTT  
AAAGTGTTTTTCGATACAGATTACACAAGTTTGTACCAACATTGCTTGTGGGGGCCACGTC  
CACGTGGCACTGGACGTGCGGGGAGACAGTCCACTAAAGCAACCTTTGTTACCTTGCGGTA  
TAGCAGTGTAGAACAACGTAACCTGTTTTTAAAGTAGGGTAACAATTCCAAAAGGTATTAA  
AGCAATGCAAGGCCATATGTCCATGTGCTTCTAAACATATTGGGTGTATGTACATATATG  
TATATATGCTGTAATACTTACATTGTATAGGTGTATACAAATTGTGTTTGCAGTACACTG  
AGCCACATATTACCAATCCACCCCCACACCTGGTAAAGTGTGCACACAGTTACAACCCTG

GATCTTGTTTTATGCTTTATATGTTGGTGGTGTGACATACTTGTGCTTCTTGTTTGCTTT  
TGGCTTTTCGTACCTTTCTCCCTGTGCTGCCTTTGTTGTGTTTATGTGCATTATATACCTA  
GGGTTGTTTTTAGTGTACCTTCAGGTACTGTGGTCCAGTGGATTGTTATAACCACACAAC  
CAGCCATACACTGCTGCTATTTGTATATAGTTTGTTCCTTGTGTATTGTAGGTGCATTAT  
GTATCCATTGGAAACACGACGGGGGGGGCCGTCCTATGATGTGATTGTTTTTGGGCAAGC  
TGATACTGGATTACTGTTAATAATTTTAATTTTGATCATCATAATTATTATCCTGCTGTA  
TATGAGGCTTATGCACATGTAGACTCCTTACTGTGTTCCCTTTTGTATTCCCATACATTTT  
TGATATTACTTTTTTGTATTGTTTTATACACAGCACTTAATAAATACATTTAATTACACAA  
TGTCCACTGTGGTTAGGCGACGCAAAACGAGCGTCCGCAACAGATTTGTATCGGACCTGCA  
AAGCTGCAGGTACCTGTCCCCCAGATGTTATTCCCTAAGGTTGAAGGTGATACATGGGCCG  
ACAGACTGTTAAAATGGGCCAGCTTGGGTGTGTTTTTTGGACGTCTTGGAATTGGTACAT  
CCTCTGGTACAGGGGTTCGTACAGGCTATATACCGTTGGGTACCCGTCTCCCACGGTGG  
TAGATGTTGGTCCCTACAGCACGCCCCCTGTGGTTATTGAACCTGTGGGCGCCGGGGAGC  
CTTCTATTGTACAGCTTGTAGAGGATTCCAGTGTATTGAGGCGGGGCTACTGTGCCTA  
CATTTACAGGCACACATGGGTTTGAGGTCAGTCTTCCACCACTACCCCTGCTGTGC  
TAGATATTACCCCTTCGTCCACCACCGTACAGGTTAGCAGCACTAGCTTTACTAATCCCT  
TGTTTACAGAACCTTCTATAATTGAGGCTCCACAACATGGGGACATTACTGGACATGTGT  
TTACAAGCACGCCCACATCTGGCACTCATGGCTTTGAGGAAATACCCATGCAAACCTTTG  
GCACCTCCTATTGGTACAGGCCAGGAACCTATAAGTAGCACTCCCATTCAGGTGTGCGAC  
GTGTTGCAGGCCCCTCGCATTGGCCTTTACAGTCGTGCGACAGACCAAGTTAAAGTATCTG  
ATTCTGCCCTTTATATCCCGCCAGGCTCTTTTGTAAACATATGACAATCCTGTATTTGACC  
CCGAGGAAACAATCATATTTGAACACCCTAGTTTACATGCTCCACCCGATCCTGACTTTC  
TGGATATTGTGGCATTGCACAGGCCTGCCTTAACAACCTAAGCAAGGTGCTGTTTCGGGTTA  
GTCGTATAGGTCAAAGGGCCACATTACGCACCCGCTAGTGGCAAACGCATTGGTGCCCGGG  
TGCATTTTTTACCATGATATTAGTCCTATTGCAGGTGCAGAGCATATTGAACTTCGCCCT  
TGCAGCCTTCCATTGCTACTGCCCCAGGGGACTCCTTATATGATATTTATGCTGATAATG  
GCCACTTGGACTCCTTGGCGTCTCCACATGTTTCATATACTTCTTCCACGTCTGTTCCCTT  
TGCAATCTACAAATATTTAGCTACATCTGTGGTCTCTGCGCGGTATGACAATGTCACAG  
TACCACTCTCTTCTGGGTTTGATTTGCCTGCATATACAGGCCCTGACATTCCAATTGCCA  
CTCCTACTACCAGTGTGCTGCATGTTTCCCAGTCCTCTAATGTTCCCTCCCAATCTGTGT  
TTGTGGATGGTACAGACTATTTTTTTATTGCCTAATTACTTATTCTTTCTAAAAAACGTA  
AACGTGTGCACTATTCTTTTGCAGATGGCTTTGTGGCGACATGGTGACGGCAAAACATAC  
TTGCCTCCCACTCCTGTGTCTAAGGTTATGAGCACGGACCGTTATGTTACACGCACCAGC  
CTATTTTATTATGGTGGCAGCTCCAGACTTCTTACTGTGGGACACCCATACTATCCTGTG  
CAGGTTAATGGGCAGGGCAAAAAGGCAAAACATACCTAAGGTGTCTGGGTATCAGTACAGG  
GTATTTTCGCGTTAAATTACCTGATCCTAATAAATTTGCTCTTCCTGATACTGCTTTATAT  
AATCCAGACACTGAACGCATGGTGTGGGCCCTGCCGTGGTGTAGAGGTGGGTCTGGCCAG  
CCTCTTGGCGTTGGCACCAGTGGCCACCCCTTTATATAATAGACTGGATGACACTGAAAAC  
ACCCCATTTACTTGCTGCAGCAGACGCCGATAGACGGGACAATGTTTCTGTAGATTACAAA  
CAAACCCAACTACTTATTATTGGGTGTAAACCCCTTATTGGGGAACACTGGGCTAAAGGC  
ACTGTTTGCCTGGAGTGTCTCTAAGGCTGGCGATTGCCCCCCTTACAGTTTGTAAT  
TCTACAATTCAGGATGGCGACATGGTTGAAACAGGGTACGGTGCCATGGATTTTGCCAAT  
TTACAGGAATCTAAGTCAGAGGTGCCTATTGATATTTGCACAGGTATTTGTAAATATCCT  
GATTATTTACAAATGGCGGCTGAGCCCTACGGAGACTGTATGTTTTTTTGCCTCCGTAGG  
GAACAAATGTTTGCCAGGCATTTCTTTAACAGACATGGAACCATGGGCGAGGAACTCCCT  
GCCTCCTATTACATACCTGGCACCTCTGGAAATAATAGACAAACTCCTACCAGTTATGTA  
TATGCCCCAACTCCTAGTGGGTCCATGGTGACATCGGATTACAACTGTTTAATAAGCCT  
TACTGGCTTCAACGGGCCACGGGACACAATAATGGCATTGTGTTGGTTAATGAGGTATTT  
GTAACAGTGTGTAGATACCTCGTAGCACCAATATTACTATTTCTGACGCCACATCACAG  
TCCGGTGAATACCAGGCCTCTAAGCTTTAAGGAATACCTACGCCACACAGAAGAATATGAT  
TTACAATTTATCTTTAGCTGTGCAAAATACGTTATTACACCCGAAATTATGGCCTACCTC  
CATGGTATGAATGAATCTTTGCTAGATGACTGGAATTTTGGTGTATTGCCCCCTCCTTCC  
ACCAGCCTTGATGATACATATAGGTATTTGCAGTCCCGTGCTATTACCTGCCAAAAGGGG  
GTTTCTGCTCCTGACCCCAAGAAGGATCCATATGATGGCCTTGCTTTTTTGGGAGGTGGAT  
CTCAAAGACAACTGTCTATGGATCTGGATCAATTTCCCTTTGGGGCGTAAGTTTTTGTG



CAGCTGGGGTCCCGTTCTGTTTCTGTGTCTCGTAAGCGCCCTGCCTCTACATCCACGTCT  
GCCCCCTTCTAAAAAAAAGTAAAAAACGTAAAGTAGCGTTATACTTATGTGTTGTACGTG  
TGTGTTGTGTATGTGTGTGTATACATATGTTGCCTATGTGTTTCGTGTATGTATGCATGTT  
TGTTTGTACATGTTTGTGTGTTCTATGTGTATGTATTTGTGGAATGTATGTGTTGTTTG  
TGCATTAATAAACAGTGTGTCACTGTGGTCCAGTGTCCGGTTGCACCCCGTGAGTAAGCC  
CTCCACACGTCTTGCACCGCCTTACAGTTCCCTGACCCCTTATGTACCAGTTCCTTTTGTG  
TTGCTGCGACCGGTTTCGGTCTCCCCAATTCCTTTTGTGTTGCTGCGACCGGTTTCGGTC  
TCCCGCCTTTTCGGTCTCTACAGTGGCATGCTGCCACAACACACAATAGTAAGTAATCCT  
GTCTTACGCATATCCTGCATACATTGTGCCAATGTTCCACACCTGGGAGTGCCTGACAGT  
TTGTTGGCTGCACAACGTGGTTGCCAGACAATATTTATGTTTTACTCATACTCATCCTGC  
AAAAAATATGCTTTTAGGCATGTACTTTGGCTGACTACTTTCCCTAATTACTTTTTTGG  
CCATGCAAACTGCTTGTGTGGCCAACTATGTGTCTTGTAAAGCAGGACTAACAGTTACAA  
ACTTGTGTCACACACCTAATCCGGTTACTACCTACACAGCAATTTCTTTTATAATAATTT  
ATAACAATCATACCTATAAAAAAGTAGAGAGCAACCGGAATCGGTCCGACCGAGGGGTAT  
ACATATAAAAGGGAAGTGTGTGCTCAGCAAAGCTAGCT

>gi|71726710|gb|DQ080082.1|\_Human\_papillomavirus\_type\_106,\_complete\_genome

ATGGGTACATATAAAAGAGATATGTTGCTTCAGCACAAAATAGCCATGACCAACGGAGAC  
TGCTGTCCAAAGAATATCTTCTTATTGTGCAAAGCCTATCAACTGGACCTGCAGGACCTG  
AACATAACTTGCGTGTGTTCTGCAAAACAGCACTAACGGAGGCGGAGGTTGTATCGTTTGCA  
TGTAAAGAGCTTAAAGTTGTGTGGAGAAAACAGTTTCCATTTGCAGCGTGCTCGGCGTGC  
CTGAAAGCAGCTGGAATACTTAGACAATTTAGATACTGGGACTACTCCAGCTATGCACCC  
ACAGTGGAGTATGAAACAGGGATACCAATACTAGAGCTGTTTATTAGATGCTACCTGTGC  
CATGCACCGTTGTGCACTGTGGAAGGAAACGGCTAATAACAGAAGGCAAACGGTTCCAT  
AAAATAGCCGGGCACCTGGCGAGGCGCTTGCCTGCAGTGTGGACATCATGCATGGCCAAC  
AACCAACCTTAAAGGACATCCTGTTAGAATTGGATGAGCCAGATGTTGTTGACCTGCATT  
GTAACGAGCAATTTGCCAGCTCAGAAGAGGAGGATAATAGGGAGGACGGTGAGCAACCTA  
CAGAACCAGCACAGCAGGCATACAGGGTATTAACATGCTGTTGTAGGTGTGGGCGTGCAG  
TAAGGCTGGTGGTGGAGAGTGGACACGCAGAACTCAGAGTGCTGCAGGAGCTTCTGTTGG  
GTGCACTGGGCATAGTGTGTCCGCACTGCGCATAACTGCTATGGCCGACTGCGAAGGTAC  
CAATGATGGGGACGATGTGGAGGAGGGACGGGGGGCATGCGGGTGGTTCTGGGTGGAAGC  
CACAGTAGACAGGACCACAGGACAGCAAATATCTAGTGATGAGGAGGACGAGGACGACGA  
TACAGGACAGGATATGGTCGATTTTATTGATGATAGGTATGCTGGGGATGGACAGGAAGG  
TGCGCCTGAACTGTACAGACAACAGGAGGTACAAGATGACGAGGCAATTGTGCAGGCCCT  
AAAACGAAAGTACATAGCTAGCCCGTTGTCCGCCGGGCTATGTATAGACAAAGAACTGAG  
TCCACGGCTGGATGCCATAACCATAGGTAGACGCTCACAAGGGGCAAACGCTAGACTGTT  
TGAGCTGCAGGACAGTGGTTATGGCAATACGCAAGTGGATACTGACGCGACAGAGGACCA  
GGTAGTAGGGGAACGCAAAGGGGACCCAGGCACGGGGGGGTACGGGAAGCTGAGGAGGA  
GGAGGAGCGTCAGGGGGGGGATGGTGCACCAGGTGCAGAGACAGCTTCAACACAGGCGGG  
TACAGAGGCTGTGTTAGCGCTGCTAAAGACAAGTAACCTAAGGGCGACGCTGCTAGGTAA  
GTTTAAAGACTTATTTGGGCTGTATATATGGAGCTGGTACGGCAGTTTAAAAGTAATAA  
GACAACATGTATAGACTGGGTAATTTGTGCATTTGGCGTGTATTGTACAGTTGCAGAGGG  
CGTAAAGACCCCTTATACAGCAACACTGCCAATATGCACATATACAGGTGCAAACCTGCAG  
ATGGGGAAATGGTGGTCTAATGCTAGTACGATATAACTGTGCCAAAAACAGAGATACAGT  
TGCAAAATGTATGGGCGGGCTGCTAAATATACCAGAGCACCATATGCTTATTGAACCGCC  
CAAAATTAGATATCCACCAGCAGCACTATATTGGTACAAAGCAGGCATGGGCAATGCCAG  
TGAAATAATTGGAGAGACGCCAGAATGGATAGTAAGACAAACAGTAGTAGGCCACAGTTT  
AGAGGAATGTCAATTTCAACTATCAGTAATGGTGCAATGGGCCTATGACCATGACATAAC  
AGATGAAAGCATATTGGCATATGAATATGCACGATTGGCAGATGTAGATGGAAATGCAGC  
GGCATTTTATAGCAAGCAATTGCCAGGCAAAATATGTAAAGGACGCATGCACTATGTGCAG  
GCACTACAAACGGGCGAGAGCAGGCCCCAAATGACAATGTACAGTGGAATAACCTTTAGAAG  
TGCAAAAATATCAGAGGAGGGGACTGGAGGCCAATAGTGCGGTACCTAAGACATCAGGA  
CATAGAGTTTATTTTCAATTTGTAATCGCACTAAAAAACCTACTAAAGGGAATACCAAAAAA  
ATGTTGTATAGTTATTTATGGGCCTGCAGACACAGGCAAATCATACTTTTGTATGAGCTT  
GCTACGCTTCCTGGGAGGGGTAGTTATTTTCATATGCCAATTCAAGCAGCCATTTTTGGCT  
GCAGCCATTATGTGATGCAAAAATAGGATTAATAGACGATGTGACACCCCACTGCTGGAG

TTACATAGATACATACCTACGAAACGCGCTGGACGGAAACCAGGTATGCATAGACAGAAA  
ACACAGGCCATTGCTGCAACTAAAATGTCCACCCTATTAATGACAACAAATACCAATCC  
TTTAGAGGAAGACAGGTGGAAATTTTACGCTAGTAGACTGCAAATGTTTACCTTTAAAAA  
CGCATTTCCCGTGAATCAGAAAGGGGACCCATTGTATATACTAAATGATGCAAATTGGAA  
ATGCTTCTTCCAAAGGTTGTGGGCTCGGTTAGACTTACACGAGCAGGACGACCAGGAGGA  
CAATGGAGACATTGGCCAGCCGTTTAGATGTGTGCCAGGAGAAGTTGCTAGAACTGTATG  
AAAAGGATAGTGACCAGCTGCAGGACCAAATATTGCACTGGCACCTTGTGCGATGGGAAA  
ATGTTATTTTATATAAGGCACGTGAAGCGGGACATTTGCACCTAAACCACCAGGTGGTGC  
CAGTGCAATTGATTGCAAAAGCAAAAGCATGTAAAGCTATTGAAGTGCAGCTTGCATTAA  
AGACATTGCTAAAAAGCCCCTATGGCACGGAACCGTGGACATTGCGTGACACAAGCCAGG  
AAATGTGGGACACAGAGCCTAAGCAATGCTGGAAAAAAGGGGCTACACCGTAGACGTTA  
AGTTTGATGGCGAGGAATCCAAACTATGTGCTACACATGCTGGAGGGATATATATGTGC  
AAAGCATTGCTGATGATACATGGGACAAAGTAACGGGCCATGTGGACCATGCAGGACTAT  
ATTATGTGCACGAAGGGACACGTGTAACCTATGTTAAGTTTTTACAGGAAGCACAGACAT  
ATGGGAGCACTGGCACCTGGGAGGTGCATGTGGGAGGACACATTATTTATGATGCATTTCG  
ACCCCTCTGTGTCTAGCACCCAGGACACCGAGCAAGAACCCCTATCCACTACTAGACCTA  
CTGACCCATCGCACACCGACCAACCCGACGCCACCACCCCAACCCCGTGTGGGCCCCG  
CGCCGACCTTCGTGCCGCCGCCGCTAAGCGTCAGCGACTCGGATACGGACCTCAGCACA  
CAGAGCAACCGGACTCAACAGGGGACAGGGGTGAGCGGCTGGCACGTGACAACGCAAGGG  
ACCAGTGTAAACCTGACGGCGCGAACCAGCAGGAACATCAGTGTCCGTCACGGTGCAC  
CTGTAATACACCTCCGAGGTGATCCAAATAAGTTAAAGTGTTTAAAGATATAGACTAAAAA  
AGCATACACCTGTATTATTTACCAAAGCATCATCCACCTGGCGATGGTCAACGTGCAGTA  
GCCCCACCGATGCAAATTTCTGCCTTTGTAACATTGTGGCATGATAGTGTAGAGCAAAGAG  
CAAAGTTCTTAGCTACGGTGACTCTGCCTAAGGACATTGTGGCTGTACCTGGGTACATGA  
CTATGTTTGCATAATAGTGGCCTGTGTATATTGTATACTTGTATATTTGTATACCCATTG  
TACAGTGCAGGAACATTAAGGGCACGTAGGCACGTGTGTATACTACACCTGGAGATTTTT  
ATTTGCTGGCTATCTGTTTGGACACACCTGCTGCTATTGCTTATTTGTTTCTGGCTTTCT  
ATGCTGTCTGCTTTACTGCATTTCTTGTTTTTTTTTTGCTGTGTATATAGCCCTTCTAA  
TAGTATACACACAGGCAGTGCGGTCCCTTGACCAACTGTGACCTTACCACACAACCAGCC  
AAATCTGCTGCTCAATTGTATATATTCCCTGTGTGTCATAGTGTGCAACTATGTATCCTG  
TAGTGGTGCCTGATAAGGGGGGTGATACAGAATATCCTGCTGTACTGTGGACACCCCAAG  
ATGACAAACTGTTGTTATTGCTGCTGGTGTAGTTTGTCTTTTGGTGTTTTTTAGTTACC  
TTCGTTTGTGTCAGTAGTTTTTACCTTTTGTATGTACATGTACTAGGGTGGGTTTTATAT  
TATTGGGTGTTGTGGGTATATTTACATATTTTGTGGTTTTTACATTTTACATATT  
TTGCGATAAATACTGTTAATATGCATCGATCCAAGCGACGCAAGCGTGCCTCCACCACAC  
AACTATATCAAACCTGCAAAGTGGCAGGTACCTGCCCCCTGATGTTATTAACAAGGTTG  
AACACACCACCATTGCAGATAAAATATTACAATGGGGCAGCTTAGGTGTGTTTTTGGGG  
GGTTGGGAATTGGTACTGGGTGCGGCACTGGTGGGCGCACTGGGTATATACCCATTGGAA  
CCCGGCCCCCTACTGTTGTGGATGTAGGCCCTCCAGCCCGCCCCCTGTTGTTATTGAGC  
CAATTGGGGCGTCTGAACCGTCCATTGTCACCTTAGTGGAGGATTCCAGTATTGTTGCCT  
CCGGTGCCCCGCATCCACCTTTACAGGAACAGATGGGTTTGAGGTACCACTGCCTCTA  
CCACAACCCCTGCTGTGTTGGATATAACCCCTTCAGGTGGCACTGTGCAGGTTAGTAGCA  
GTAGCTTCACCAATCCATTATTTACTGAGCCAGCATTAGTAGAGCCTCCACAAACAGGTG  
AGGTCTCAGGACATATATTAATTACTACACCTACAGCTGGATCTCATGGCTATGAGGAAA  
TACCTATGCAAACCCCTGCTGTGCAGGGCACTGGGGAGGAGCCTATAAGCAGTACCCAC  
TTCCGGGGGTACGACGTGTGGCCGGGCCACGGTTGTATAGTAGGGCTATCAACAAATTA  
ATGTACGGGACCCACCTTTATGTCTGAACCTGCAACATTTGTTACCTATGACAATCCTG  
TATATGATCCAGAGGAAACAATTATTTTTGAGCGTCCCAGCATTCAGCAGGCCCTGATC  
CTGACTTTTATAGATATTGTGGCACTTCACAGCCCTGCCTTGGCAGACGTAAGGGCACTG  
TACGGTACAGTCGTGTTGGGTGAGCGGGCTACATTAACCAAGTGGCAACGTATAG  
GTGCACGGGTTCATTTTTTACCATGATATAAGTCCAATTACTCCTGCTGAAGAGTTAGAAA  
TGCAACCTCTGGTGTCTGACACCCCTACTTATCTTAATTCCTTATATGATATTTATGCTG  
ACACCGAGACGCCTGGGTGCGCTCAGGGCACCTTAGCTTCTATACACACATCCACACCTT  
TGCAGGCGCCTTCATTGGCTGCATCATCCACTGTCTCCACAGTATCGCACACTACTGTTT  
CCCTGTCTACAAGCTTTGATGTCCCTGTTTTTAGTGGCCCTGACAGTGCTCTTCCCGATT

CCCACACTGCTTGGCCCGTGCCCCCTACCCCTCCTGGTCACCCACAGGCGATGTGCTTG  
TGCACGGGTCTACATATTATTTATTGCCCTCATATGTGTTGCTTCCTAGGAAACGTAAAC  
GTTTTCCATCTTTTTTTCAGATGGCATTGTGGAAGCCTAGTGACAACAAAGTATACCTG  
CCTCCCGCCCCCTGTGCCAAAGGTTCTGAGCACCGACGACTATGTATCAAGAACAAACATT  
TATTATTATGCAGGCAGTTCCCGATTGCTGACCGTAGGTCATCCATATTATCCTATCAAA  
AAGCAAAGTGACGGAACCTATAGTGGTGCCCAAAGTGTCTGGATACCAATATAGGGTA  
TTTAGGGTTCGTTTGCCTGATCCCAACAAATTTGGCCTTCCTGATGCATCGTTATATAAT  
CCAGACTCCCAGCGTCTTGTCTGGGCCTGTACGGGTGTTGAGGTTGGTAGGGGGCAGCCA  
TTGGGGGTAGGGGTTAGTGGCCACCCCTTATATAATAGGTTGTATGACACTGAAAACACT  
AATTTATTTGATGTTGTTCTTGGGGACGACAACCGGGACAATATGTCCATGGATTATAAA  
CAAACCTCAGTTATGTATTATTGGCTGTAAACCGCCATTGGGGCGAACACTGGGCAAAAGGC  
ACTCCATGCAATACCTCCAATGTCACTGCAGGGGATTGTCTCCTTTGGAACCTCACATCT  
TCCACAATACAGGATGGGGACATGATTGATACAGGGTTTGGTGCTCTTGACTTTGCATCA  
CTGCAAAACAAATAAATCGGATGTGCCTTTAGATATAGTTACCACCACATGCAAGTACCCA  
GATTTTTTGCAGATGGCAGCTGAGCCTTATGGTGATTAAATGTTTTTTTCATTACGCAGG  
GAACAAATGTTTGTAGGCATTTTTACAACAGGGCCGGTACCATGGGGGAGGATGTTCCG  
GAAGGGTTTTTACTAAAGGGGCCTACTACTACATCCCGCGCCTCTGCTACAAGCTCACTA  
TATGGGTCCACGCCTAGCGGGTCAATGGTTACTTCAGAGTCTCAGTTGTTTAAACAAGCCC  
TACTGGCTACAACGTGCACAGGGCCGAAACAATGGTATCTGCTGGGGCAATCAGGTATTT  
GTCATGTGGTAGATACCACACGACGACCAATATGACTATTTGTGCCACGCAACAGAA  
AATGCCACATACAAAGCTTCCAATTTTAAAGGAATACCTGCGCCACGGAGAGGAATTTGAT  
TTGCAATTTATTTTTCAGCTATGTGTTATTAATTTAACTGCCGAGGTTATGGCCTACCTA  
CATAGTATGAATGCTGCTTTACTAGAGGACTGGAATTTTTGGGTGCTTGCCCCCCCCCTACC  
GCCAGTCTTGGCGATACCTATAGGTTTTTACAGTCCCAGGCCATAACATGTCAAAAGCCC  
TCCGCGGCGCCTGCAAAGAAAAAGGACCCTTACGATGGGCTTACGTTTTGGGATGTGGAT  
TTATCAGAGCGCTTTTCCCTTGAGCTTGACCAGTTTCCCTTGGGTAGGAAGTTTTTGCTA  
CAACATCGTACACGTGTGCGGTCTCCCTGTGTCCCGTAAGCGTCTGCACCATCGTCC  
ACCCACACGACCACAAAGCGTAAACGGTCCAAGCGTTCCTAACTGTGTTGCTGCTGTGGG  
TTGGGTGTACCTGTTGTTGTGTATATAATGTGTGTTGTACTGCATGTATGTACGTTGGTT  
GTATGTGCTGTGACTGTGTGTGTATGGGGCGGGACCCCCCCTGGTATGTATGTTTCCTG  
ATGCATGTTTGTGTGCATGTCTTATATATTAATAAATGTGTGTCATGTGTGGTTTGTGTC  
CGGTTGCGCCTTGTGAGTAACTATACATTTATGTTGTGTAGTCCAGTCCCTGTGGCCCCG  
TCATGCATACCCCCGCCCTTATAACACAGCGACCGATTTTCGGTCGCTGCTGGTTTCGGTC  
GTCCACAACATGGCGCCTTGTGGCACTCTTTCGATAACAGTTAATCCTTTCCGCGCCAC  
TTTTTTGTTTAAATGCAGGTGTGCATGCCTTTCTAAGGTGTGCCTGGCAGTTATTTGGCA  
GGATATAAATGCATTTCCAAATGCATTTCTTAATCTATATTGTCTATGTTACTCACACTT  
CAATAAACTATACTTTTAGGCACATAGTTTTATGCTGACTACTTTCACTTAAGTACCTAT  
TTGGCAGGCAAACCTGCTTTGCTATTCAACAATGTGTCTTATATAATTGTTCAACAAATT  
CAAACATGTGTTTACCACACCTATTCCGGTCGCTCCCACTACACATCTTACTCATTATTA  
TAAATTATAATGGTTTTATTACAAAATAGGAGGGACCGAAAACGGTCCAACCGAA

>gi|71726685|gb|DQ080079.1|\_Human\_papillomavirus\_type\_68a,\_complete\_genome

ATGGCGCTATTTCAACCCCTGAGGAACGGCCATACAAATTGCCAGACCTGTGCAGGACA  
TTGGACACTACATTGCATGACGTTACAATAGACTGTGTCTATTGCAGAAGGCAACTACAA  
CGGACAGAGGTATATGAATTTGCCTTTAGTGACCTATGTGTAGTGTATAGAGACGGGGTA  
CCATTTGCTGCATGCCAATCATGTATTAAATTTTATGCTAAAATACGGGAACCTACGATAT  
TACTCGGAATCGGTGTATGCAACTACATTAGAAACCATAACTAATACAAAGTTATATAAT  
TTATTGATAAGGTGCATGAGTTGCCTGAAACCATTGTGTCCAGCAGAAAACTAAGGCAC  
CTAACAAACAAAACGAAGATTACATAAAATAGCAGGAAACCTTTACAGGACAGTGTGCGCAC  
TGCTGGACCAAGTAAGCGAGAGGACCCGACGACATACGTCAAGAAACACAAGTTTAAAGTA  
ACTATGCATGGACCAAAGCCACCGTGCAGGAAATTGTGTTAGAGCTATGTCCATACAAT  
GAAATACAGCCGTTGACCTTGTATGTCACGAGCAATTAGGAGATTACAGACGATGAAATA  
GATGAACCCGACCATGCAGTTAATCACCCACCAACATCTACTACTAGCCAGACGGGACGAA  
CAACAGCGTCACAGAATTCAGTGTCTGTGTTGTAAGTGTAACAAGGCACTGCAACTAGTA  
GTAGAAGCGTCGCGGGACAACCTGCGGACACTACAACAGCTGTTTATGGACTCACTAAAT  
TTTGTGTGTCCGTGGTGTGCAACTGAAACCCAGTAATCTGCAATGGCCAATTGTGAAGGT

ACCGATGGGGACGGGACGGGGTGTAAACGGATGGTTTTTTTGTAGAAGCAATAGTAGATAAA  
CAAACAGGTGACACAGTCTCAGAGGATGAGGACGAAAACGCAACAGATACAGGTTTCAGAC  
ATGGTAGATTTTATTGATGATTCTACACATATTTGTATACAGGCAGAGCGTGAGACAGCA  
CAGGTACTTTTGAATATGCAAGAGGCCCAAAGGGATGCACAAAGGGTGCGTGCCCTAAAA  
CGAAAGTATACAGACAGTATAGAAAGCAGTCCTTTAGCAAAGTCGCCATTACAGGAATTA  
TCACTAAATGTAAGCAGTACACAGGCAAGACAACCGGCGTATACAGTGCCGGACAGCGGC  
TATGGCAATATGGAAGTGGAACCTAACTCGGAGGTAAGTGTAGCACCTAATATAAATGGG  
GAGGATGGGGAAAAATGAAGGGGAAAAATGGCGACAGTATACGGGAGGACTGTAGTAGTGTG  
GACAGTGCTATAGATAGTGAAAACAGGATCCCTAAATCACCTACTACCCAACTTAAAGTA  
TTATTACAATGTAACAATAAAAAAGGCTGCAATGTTAACAGAATTTAAAAAAGTATATGGA  
TTGTCATTTAATGACCTGGTACGTACATTTAAAAGTGATAAAACCACATGTACAGACTGG  
GTAGCAGCAATATTTGGAGTAAATCCAACCATTTGCGGAAGGGTTTAAAACTAAT'AAA  
CAATATGCATTTGTATACCCATATACAATGTTTAGATACAAAACTGGAATATTAATACTA  
ATGCTAATAAGATACAAATGTGGAAAAAATAGAATAACAGTAGGAAAAGGATTGAGTACA  
TTGTTGCATGTTCCAGACAGCTGTATGCTTTTGCAGCCACCAAATTACGTAGCCCTGTT  
GCAGCATTATATTGGTATAGAACAGGAATATCTAATATTAGTGAGGTGTGTGGCGACACG  
CCGAATGGATAAAAAGATTAAACCATAATACAACATGGAATAGATGATAGTGTATTTGAT  
TTATCAGACATGGTACAATGGGCATTTGATAATGAGTTAACAGATGACAGTGATATAGCA  
TTTCAATATGCTATGTTAGCAGATTGTAATAGTAACTGCTGCAGCGTTTTTAAAAAGCAAC  
TGTC AAGCAAAAATATGTAAGAATTTGTGCAACAATGTGTAGACATTACAAACGGGCGCAA  
AAACGACAAATGACAATGCCACAATGGATTAAATTTAGATGCAGTAAATGTGACGAAGGC  
GGTGATTGGCGCCCAATTGTACAATTTTTTAAGATATCAAGGACTGGAATTTATAACATTT  
TTATGTGCATTAAAAAGATTTTTTTAAAAAGGCACGCCAAAACGAAATTGTATAGTTATACAT  
GGGCCGCCAAAATACAGGCAAGTCATATTTTTTGCATGAGCCTTATACATTTTTTTACAAGGC  
ACAATAATTTTCATATGTAAATTCAGCAAGTCACTTTTTGGTTAGAGCCACTTGCAGATGCA  
AAAATAGCCATGCTAGATGACGCAACAGGTACATGCTGGTCATATTTTGATAATTACATG  
AGAAATGCATTAGATGGTAACCCAATAAGTTTAGATAGAAAACACAGACACCTAATACAA  
ATAAAGTGTCCACCAATGCTAATAACATCCAATACTAACCCTGTAGAAGACAATAGGTGG  
CCGTATTTACATAGTAGACTAACCGTGTTTAAATTTCCCTAATGCATTTCCATTTGACCAA  
AACAGGAACCCAGTGTATACAATCAATGATAAAAACCTGGAAATGTTTTTTTGAAAAGACT  
TGGTGCAGATTAGACTTGCAGCAGGACGAGGATGAAGGAGACAATGATGGAAACACTTTC  
CCAACGTTTAAATGTGTTACAGGAGAAAAATATTAGAACATTATGAACAGGACAGTAAATG  
TATACAGGACCATATTAACCTATTGGAATTGTGTGCGACTGGAAAATGCAATATATTATGC  
AGCACGAGAACGTGGTATGCATAATATTGACCACCAGGTGGTGCCGCCTGTAAACATTTTC  
AAAACTAAAGCATATCAAGCTATTGAACTGCAGATGGCACTAGAGAGCCTTGCTAAAAC  
TGCATATAGTGCAGAGGAGTGGACATTAAGGGACACAAGTAATGAACTATGGCATACAAA  
GCCAAAGCAATGTTTTTAAAAAACATGGTGTTACAGTGGAAGTATGGTATGATGGGGACAA  
GAGTAACTCAATGCATTATGTAGTGTGGGGTACAATTTACTTTAAAAACAGTACAGACAC  
ATGGTGTA AAAACCAAGGGCGTGTGGATTACTGGGGTGTATATTATATGTATGAACAACA  
AAAAACCTATTACGAAAGGTTTATGCAGGATGCACAACCTATATGGGACTAGTGGA AATG  
GGACGTGCATTATAATGGCAACATAATCCATTGTCCTGACTCTATGTGCAGTACCACTGA  
CGGAAAAGTATCCACTACTGAATCTGTTGCCGACCTACAGAACACCACCGCGACCCATAC  
CACC GCAGGTGCCCCATGCACCAAAAAAACAACCTCGACGTCGTCTCGGAAGTATCCCAG  
ACAGTGCGGAATCACTGAGCCCTCTGAGCCCGACAACGTGTCCGTGGACGGTGTGACCT  
CCCCTCCTCAGTAGAAGTGCAGGCCAAAACAAAAGACGGAGCCTTTGTTGTGGTGACAC  
TACACCTATAGTGCATTTAAAAGGTGACAAAAATGGATTAAAATGTCTTAGGTATAGGTT  
GCAAAAACATAACGCTTTGTATGACAATATATCATGTACATGGCATTGGATAAGGGGTAG  
GGGATCAACCAATACAGGTATATTGACTGTAACATATGTTTCAGAAGCACAACGTGACAA  
GTTTTTTGGAAACTGTTAAACTACCATCTAGTGTAACCTGTGTCATTGGGGTATATGACATT  
ATAAGTGTGTATTGACCCACACTGTACACTATATGTATATTGTATACATATGCTTGTATT  
GGTATTTTGGTGTGGTTTTTGTGTATGCATGTATATATGTTGCACTGTCCCGCTTTTGCA  
GTCTGTGCATGTGTGTGTGTATGTGTGGATATTTGTGTTTGTGTTTATATTAGTTAGAAC  
TACACCATTTGAGGTGTTTGCTGTATACCTACTTTTTTTTTTATACTGCCTATGTGGTTATT  
ACACAGTCTTACTCTTAATACTATACAGTAACTGTTATAGTGTGCATTTGTATTGTTGTT  
TATTTGTATAAATAAATATGGTTTTCACACCGTGCTGCCAGGCGCAAGCGTGCATCTGCAA

CTGACTTATATAAAACATGTAAACAATCAGGGACATGTCCTTCTGATGTTATAAATAAGG  
TTGAAGGTACTACACTTGCAGACAAAATATTACAATGGACAAGTTTAGGTATATTTTTGG  
GTGGCCTGGGTATAGGTACTGGCTCTGGCACCGGAGGTCGTGCTGGGTACATTCCCTTTAG  
GTGGAAAACCTAATACTGTTGTGGATGTGTCGCCTGCACGTCCACCTGTGGTTATTGAAC  
CTGTGGGTCCCTACGGAACCTCCATTGTGCAATTGGTGGAGGATTCCAGTGTTATTACAT  
CTGGGACACCACTACCAACATTTACAGGCACCTCTGGGTTTGAAATTACATCTTCGTCTA  
CCACTACACCGGCAGTTTTAGACATTACCCCTTCGTCCGGGTCTGTGCAGGTAAGCAGTA  
CTAGTTTTACTAACCCTGCATTTACAGACCCGACTATAATAGAAGTGCCACAAACAGGTG  
AGGTGTCTGGTAATGTGTTTTGTAAGTACCCCTACATCAGGAACACATGGATATGAGGAAA  
TACCTATGCAGGTATTTGCAACACATGGCACTGGTACAGAACCTATTAGTAGTACTCCTA  
TACCTGGGGTTAGTCGTGTGGCAGGGCCACGTTTATATAGTAGGGCACATCAACAGGTTT  
GTGTTAGTAATTTTGATTTTGTAAACGCACCCCTTCATCATTGTGTAACATTTGATAATCCTG  
CTTTTGAGCCTGTTGATACTACTCTTACATATGAACCTGCTGACATAGCTCCTGATCCGG  
ATTTTCTGGACATTGTTTCGTTTACATAGGCCTGCCTTAACATCCCGAAGAGGAACAGTAC  
GTTTTAGCAGAGTAGGCAAAAAGGCGACCATGTTTACACGCCGAGGTACACAAATTGGGG  
CACAGGTGCACTATTATCATGATATTAGTAACATTACCCCTGCTGACAGCATTGAACTAC  
AACCATTGGTTGCCCCGTGAGCAGGCGGACCCCTATGGATAACTTATATGATATATATGCAC  
CTGATACTGACAATACTACAGTATTAGATACTGCATTTTATAATGCTACATTTACTACTC  
GTTCCACATATCAGTTGCCTTTCATTGGCTTCTGCTGCATCCACTACATATACTAATACTA  
CCATTCCTCTTGGTACTGCTTGGAAACGCCTGTAAATACTGGTCCCTGATGTTGTATTAC  
CATCTCAACCCACAGTTGCCTTTAACACCCCTCTACTCCAATTGATAACAACCTTTGCCA  
TAACTATATATGGTTCCAATTATTATTTATTACCATTGTTATTCTTTTTATTAAAAAAC  
GTAAACACCTTCCTTATTTTTTTTACAGATGGCATTGTGGCGAGCTAGCGACAACATGGTG  
TATTTGCCTCCCCCTCAGTGGCGAAGGTTGTCAATACAGATGATTATGTGACACGCACT  
GGCATGTATTACTATGCTGGTACATCTAGGTTATTAAGTGTAGGCCATCCATATTTTAAG  
GTTCTATGTCTGGGGGCCGCAAGCAGGGCATTCCTAAGGTGTCTGCATATCAATACAGA  
GTGTTTAGGGTTACCTTACCTGATCCTAATAAATTTAGTGTTCCTGAGTCTACATTATAT  
AATCCAGATACACAGCGCATGGTATGGGCCGTGTTGGTGTGAAATAGGTAGGGGGCAG  
CCATTGGGCGTTGGCCTTAGTGGGCATCCACTATATAATAGGCTGGATGATACTGAAAAT  
TCCCCGTTTTCTCTAATAAAAATCCTAAAGACAGTAGGGACAATGTTGCAGTGGACTGT  
AAACAAACACAGCTGTGTATTATAGGCTGTGTTCTCTGCTATTGGCGAGCACTGGGCCAAA  
GGTAAATCTTGTAAGCCTACCAATGTACAACAAGGGGACTGTCCCCCATGGAATTGGTA  
AATACTCCTATTGAGGATGGCGATATGATTGATACAGGATATGGTGTATGGACTTTGGT  
ACATTACAAGAAACGAAAAGCGAGGTACCTTTGGATATATGTCAATCTGTTTGCAAATAT  
CCTGACTATTTGCAAATGTCTGCAGATGTGTATGGAGACAGTATGTTTTTTTGTTTACGT  
AGGGAACAGTTATTTGCCAGGCATTTTTTGGAATAGGGGAGGCATGGTAGGGGACACTATT  
CCCACTGACATGTATATTAAGGGCACTGACATTCGTGAAACTCCTAGTAGTTATGTGTAT  
GCCCCCTCGCCTAGCGGTCTATGGTGTCTCTGACTCCCAGTTATTTAACAAGCCCTAT  
TGGCTGCACAAGGCACAGGGACACAACAATGGTATTTGTTGGCATAATCAATTATTTCTT  
ACCGTTGTGGATACAACGCGCAGTACTAATTTTACATTGTCCACTACTACAGACTCTACT  
GTACCAGCTGTGTATGATTCTAATAAATTTAAGGAATATGTTAGGCATGTTGAGGAATAT  
GATTTGCAGTTTATATTTTCAAGTTGTGTACTATAACATTATCCACTGATGTAATGTCATAT  
ATACATACTATGAATCCTGCTATTTTGGATGATTGGAATTTTGGTGTGCCCCCTCCACCA  
TCTGCTAGTCTTGTAGATACATAACCGCTACCTACAATCAGCAGCAATTACATGTCAAAAG  
GACGCCCCCTGCACCTGTTAAAAAAGATCCCTATGATGGTCTTAACTTTTGGAATGTGGAT  
TTAAAGGAAAAGTTTAGTTCTGAACTGGACCAATTTCCATTAGGACGCAAAATTTCTGTTA  
CAGGCAGGTGTTTCGACAGCGGCCACCATAGGCCCTCGTAAACGCACTGCCACTGCAGCT  
ACCACATCTACCTCTAAACACAAACGTAAACGTGTGTCAAATAAATTGTTATATGTCTTG  
TTTTGTATGTTGTTTGTCTGTGTGGTTGTATATGTGTGTTGGTGTGTTGGTATGTTGTG  
TATGTGATGATGATGTTGTATGTTGTATGTTGTATGTTTGCAGTATGTGTATATAATCTGT  
TTTTGTAAATAAAGTATGTATGTCCGTGCTTTTGTGGTTGCACCTGTGACTAACATAT  
GTCCTTGTTTTACATATAATAGGACTGCAACATTTTCATACATAATTTGTAGCCCTACCCT  
AAGGTGTGTTACATTATATGCAATATATTTATGGTTGCAAACTATACCGTGTGGCCATTT  
TGTATGGCCGGGTTGTGTGCGACCGCTTTTCGGTCGTTGGTACTATTTGCTTTTAGATAGT  
ATTAACACCTATGTGTTTCAGCAAAAACATGTTTTACCTTGAGTTACCCACATAGTTGGC

ACCAGTAACAGTCGTACTGGCGCACCTTAGTTAGTCATCATCCTGTCCAGGTGCACTGCA  
ACAATAGTTTGGCAACCAACGTATCTCCTCCCTTGTAATAAACTGCTTTTAGGCATAAA  
GTTTTAACTGTTTTTGCTTGCCTAATAGCATAGTTGGCCAGTATAACTACTTTTGCATTC  
AAGAATCTGTCTGGTAGTGTAAGTTATACAGTGACTAATACTACATCCATAAATTTGTGC  
AACCGAAAAAGGTTGGGCACACATACCAATACTTTTACTTATAACATTTTACAATTATTC  
TATATAAAAAAAGGGTGGGACCGAAAACGGTCACGACCGAAAACGGTGTATATAAAGCTG  
AACACAGCAGTTCTCTATACTA

>gi|2911565|emb|Y15176.1|\_HumanPapillomavirus\_type\_80\_E6,\_E7,\_E1,\_E2,\_E4,\_L2,\_a  
nd\_L1\_genes

CAAGACACTTGGCAGTACATTTTCTTGGAACACAGCACCGATAACGGTAAGATTATATCT  
GTGAACCGTAGGCGGTACTTTCTGATTGGTTTGGATGATAGTAGTTAACAACAATCACTC  
TTTATAAAATAAATGTAACCGCTGCGTTACCTTACTTGATCTAAATACAATATGCTGACT  
AAACTTTTTAGAGAGCTATATGGATAGGCCAAAGCCTTCTTCTGTGCAGGAGCTTGCAGA  
CACTCTTTGTATACCTTTAGTAGATATTTTATTGCCGTGTAGGTTTTGTCAAAGATTTTT  
AACTTATATAGAGTTAGTAAGTTTTGATCGCAAATGTTTGCAGTTGATTGGACTGAAGA  
AGACTTTGTCTTTGCTTGTGTAGCAGTTGTGCTTTTGTACTGCACAATTTGAATTTTC  
TACATTTTATGAACAGTCAGTGTGTGGTTGGGAGATTGAGGTAGTTGAGCGAAAAGCTGT  
TGGAGACATTACTATTCGTTGCAAATTTTGTTTAAAGAAATTAGATTTAATAGAAAAGTT  
AAATATTTGTTACAACAGCAGCAATTCCATAAGGTAAGGCGCAATTGGAAAGGATTGTG  
TAGACATTGTGGTTCGATAGAATGATTGGGAAAGAAGCTACTATACCAGATATAGAGCTT  
GAGCTGCAAGAGCTTGTCCAGCCCAGCTGCATTGCTACGAAGAGTTAAGTGAAGAA  
GAGACAGAGGAGGAGCCACAACATATTCCATACAAGATTGTAGCTCCGTGTTGCTTCTGT  
GAATCCAAGCTTCGACTAATAGTGGTTGCAACTTCTTTTGGAAATTCGCGCACAGAAGAG  
TTACTATTTGGAGAAGTTAAGTTGGTGTGTCCAGGGTGTGAGAGAAAACCTCGCCATGTC  
TGACGAAAAAAGGTACTAAATATGATCCTAAGGAAGGATGTAGTGAATGGTTTGATCTAGA  
AGCAGAATGCTCTGATGCTAGTTTAGATGGTGATTTGGAAAAGTTATTTGAAGAAAATAC  
AGATACTGACATTTCTGACTTAATAGATAATGAGGACACTATACAGGGGAACTCCCGCGA  
ATTATTATGCCAGCAAGAAAGTGAGGAAAGCGAGCAACAGATACACTGGCTAAAACGAAA  
GTATATCAGTTCACAAGAGGTTTTGCAGCTTAGTCCTCGTCTGCAGTCTATTTCCATTTTC  
GCCACAGCATAAATCTAAAAGGAGATTATTTGAACAAGACAGCGGACTAGAACTGTCATT  
TAATGAAGCTCAAGATTTTACTCAGCAGACTGTGGAGGTACCGGCGACCGATTCTGTGCC  
GCCAGAACAGGGTGCCAAGGGACTGGGAATTGTTAAAGATCTTCTAAAATGTAGCAATGT  
AAAAGCAATGTTATTAGCTAAGTTTAAAGAAGCTTTTGGAGTGGGATATATGGAATTAAC  
TAGACAATATAGAAGCAGCAAGACATGCTGCAGAGACTGGGTATTAAGTGTGTATGCTGT  
ACAAGACGAACATTAGAAAGTTCCAAACAACTTTTAATTACGATTGTGCTTATATTTG  
GTTGCATCAAATACCTCCTATGTGTTTATATTTATTGTGTTTTAATGTTGGAAAAAGTAG  
AGAAACAGTATTAAGATTGCTAACTAATCTTTTGCAAGTATCAGAAGTACAAATAATAGC  
TGAACCGCCAAAACCTTAGAAGTACATTGTCAGCATTATTTTGGTATAAAGGTAGTATGAA  
TCCTAATGTTTATGCTCATGGAGAGTATCCTGAATGGATAATGACGCAGACAATGATAAG  
CCATCATACAGCAGAAGCTACACAGTTTGATTTATCTACTATGGTACAGTATGCATATGA  
TAATGAGTTAACAGATGAAGCAGAAATTGCCTATCATTATGCCAAGCTTGCAGATACAGA  
TGCTAATGCTAGAGCATTTTTACAACATAATAGTCAGGCAAGATTGGTAAAGGACTGTGC  
AATTATGGTTAGACATTATAGACGAGGTGAAATGAAAGAAATGTCAATGTCTGCATGGAT  
ACATAAAAAATTAGCGTTGTGGAAGGGGAAGGACATTGGTCAGATATTGTAAAGTTTAT  
TAGATATCAAGAGATTAATTTTATTCAGTTTTTAAATGCGTTTAAATTGTTTTTACACAA  
TACTCCAAAGAAAAGCTGCTTGCTATTTTATGGGCCCTCTGACACAGGGAAATCTATGTT  
TACTATGTCTTTAATAAAGCTTTTAAAGGGAAAGGTTTTGTCAATTTGCGAATTATAAAAG  
TACCTTTTGGCTTCAGCCTGTTGCAGACACAAAAGTGGCATTGATAGATGATGTAACATA  
TGATGTTGGGATTATATAGAACAGTATTTAAGAAATGCATTAGATGGTAATACTGTTTG  
TTTAGATATGAAACATAGGGCGCCATGTCAAATTAGGTTTCCACCATTAAATGTTAACGTC  
CAACATTGATATTATGAAAGAAGAAAAATATAGATATTTATACAGCAGGATTCAGCGTT  
TGCATTTCCACATAAGTTTCTTTTGATAGTGATAATAAGCCTCAATTTAACTTACTGA  
CCAAAGCTGGAAATCTTTTTTTGAAAGGCTTTGGAGACAGTTAGATCTCAGTGATCACGA  
AGACGAGGGAGACGATGGATACTCTCAGCGAACGTTTCAATGCACTACAAGAGAATCTCA  
TGGACATTTATGAGTCAGGTCGAGACGACATAGAACTCAAATAATGCATTGGCAATATT

TGAGGCAGGAACAAGTCTTATTTTATTTTGCCAGACAGCATGGAGTTATGCGTTTAGGAT  
ATCAACCTGTACCCCTTTAGCCACCAGTGAGGCTAAAGCTAAAGACGCTATTGGCATGG  
TGATCTTATTGCAAAGTTTACAAAAATCACAGTATGGCAAGGAGCCATGGACATTAACAC  
AACTAGTTTGGGAGACTGTAAGAAGCGCACCTGCAAACCTGCTTTAAAAAAGGTCCACAAA  
ATATTGAGGTCATGTTTGACAATGATCCTGAAAACCTTATGGTTTATACTGTCTGGTCCC  
ACATTTATTATCAGACTTTAGATGATACATGGAAGAAAGTTGAGGGGAAAGTTGACTATC  
ATGGTGTCATATTACTTGGAAGGAACTTATAAAAACTATTACATTCAGTTTGAAATTGATG  
CTGCCAGATTTGGCAAAACTGGAATCTGGGAAGTGTCATGTTAATGAGGACACTATCTTTG  
CTCCTGTTACTAGCTCTTCGCCGGCAGCTGGAGAGGGGACAGCAACCTCCATCAACCCCG  
CATCCCAATCGCCGGCCAACGGACAGCCACTGCCACTGCCACCTCCGTGTCCACCAGAA  
AACGGACACCACCACGAACCGAAAGCAGACGGTACAAGCGAAAAGCATCTAGCCCTACAA  
CCACCACCACCCGGAGGCAAAAGAGACAAGGACAAAGACAAGAAGACTCAACAAGGCGAT  
CAAGGTCCACCTCAAGGGGAGACAACAAATCCCCAGGGGAGGGGACCGGCGCAGACGGC  
GACGATCCCGAGAAACCTCCACCTCCTCCGAGCGGGGAAGGGGAGGGAGAAAGTAGAAGGG  
GGCCCAACAACGATCCCAATCAAGGTCCCTCTCAAGATCCAGATCCCGATCCAAATCGA  
GATCAGGAGGGTCTTCTTCAGGGGGTGGCATTTGCGCCTGCAGACGTGGGAAGTTTCAGTTC  
AATCACTTGGTAGACAACATAATGGGCGACTTGAAAGATTACTGGAAGACGCTAGGGACC  
CCCCAGTAATTGTGCTACGTGGAGATGCTAACAAATTGAAATGCTTTCGCTTCAGAGCTA  
AGAAAAAGTATAGGGACTTAGTTAAATATTATAGTACCACATGGTCATGGGTAGGGGGTA  
CAACTAATGATAGAAATTGGACGTTTCACGGATGTTACTTGCATTTACTTCAAACACTGAGA  
GACAGCTTTTTATTAAACATAATGAAATTACCACCAGGTGTTGATTGGTCATTAGGATCTT  
TAGATGATTTGTAGCCCATGTGCCTGTAATTAACATAACAAGCGCTATTTTTTGCTTTTGC  
TACTAACATTTACTAACATTCTCATGGCCCGTGCACGTAGAGTAAAAAGTGCATCTGTA  
ACTGACATCTACAGGGGTTGCAAGCAAGCAGGTACTTGCCCCCTGATGTTATTAATAAA  
GTGGAACAAACAACCATTTGCAGATCAAATTTTAAAGTATGGAAGTGGTGCTGTTTTTTTT  
GGTGGGCTGGGAATCAGTACAGGCCGTGGTTCAGGTGGTGCAACAGGATATATTCCTTTG  
GGAGAAGGCCCTGGGGTGCGCGTAGGAGGCGCCCCACCATAATTCGCCCTGGGGTCACA  
CCTGAACCTATTGGTCCAGCGGATGTAATACCAATTGACACAGTCACACCAATTGACCCT  
ACAGCACCTAGTATTGTCACAATAACTGACAGCAGTGCTGTTGACCTTTTACCTGAATTA  
GAAACAATTGCAGAAATACACCCTGTGCCAACAGATACTGTGGATATTGATACTCCTGTT  
GTTACAGGAGGTTCGGGATTCCAGCGCTATTTTGGAGGTTGCTGATCCCAGTCCCTCCTGCA  
CGAACAAGAGTGTCTCGCACACAATACCATAACCCTGCATTTTCAGGTTCTAACTGAGTCT  
ACACCTTTATCTGGTGAATCTGCTTTATCAGACCATGTTATTGTTTTTGAAGGCACTGGA  
GGCCAAAATATAGGTGGTTCTCGCAGCACAGCTATAGAACCAGCACAAAGAAAGTTTTGAA  
ATGCAAACATGGCCTAGTAGATATAGTTTTGAAATAGAGGAAGGTACACCACCTAGGTCT  
AGCACTCCTGTTCAAAGAGCAGTTCAGTCTCTTTCAAGTCTTCAAGAGCTTTATATAAC  
CGAAGATTAACGAACAAGTAGCTGTTACAGATCCACTGTTTTTAGGAAGGCCATCACGC  
TTGGTACGATTTTCAGTTTGACAACCTGCCTTTGAGGAGGAGGTTACACAAACATTTGAA  
AGAGATTTAGAGTCATTTGAGGAGCCACCTGATAGACAGTTTCTAGATGTAGTTCGTTTG  
GGTAGACCTACATATTCTGAAACTCCTGAAGGCTATGTCCGTGTCAGTAGACTTGGTAGA  
AGAGCCACTATAAGGACCAGAAGCGGTGCACAAGTTGGAGCTCAGGTTTCATTTTTATAGA  
GATCTTAGCACTATAGACTCTGAAGCATTGGAAATGCAATTGTTAGGAGAACACTCAGGG  
GATAGCACCATTTGTACAGGCTCCTATGGAGAGTTCATTTATTGATATAAAATATTGATGAG  
CCTGAGCCATTAAATGTAGGCCTGCAGGAAACAACTGAAGCAGATGATATAGATTATAAT  
TCTGCTGATTTATTACTAGAAGATCATATAGAAGATTTTAGCGGGTCTCAATTAGTATTT  
GGTAATGCAAGGCGTAGTACTACTACATACACAGTTCCTCGATTTGAGTCTCCTAGAAAT  
ACTGGATTTTATATTAGGATGTTTCAGGGCTATAATGTAGCTTATCCAGAGTCCCGTGAC  
ACCACAGAAATAATTTTACCACAATCAGACACACCAACTGTAGTGATTAAATTTGAAGAT  
GCTGGTGGGAGTATTATTACACCCAAAGTTTAAAAAGACGTAAACGAAAACGCAAATAT  
TTGTAATGTTTATACAGATGACCTTGTGGCTTCCGGCGACGGGTAAAGTGATTTTACCAC  
CAACACCCTGTAGCACGTGTACAAAGCACCAGTGAATATGTGGAAAGAACTAATGTAT  
TTTACCATGCCATGAGTGATCGCCTTTTAAACAGTTGGGCATCCCTATTTTGATGTTAGAT  
CTTCTGATGGAGCTAAAATTGATGTTCCCAAAGTGCTGTGGAAATCAATACAGGGCATTTA  
GGGTACATTTCTGATCCAAATAGATTTGCTTTAGCAGATATGTCTGTTTATAATCCAG  
AAAAAGAAAGGTTGGTTTGGGCCTGTGCAGGCCTAGAAATAGGCAGAGGACAACCATTAG

GTGTAGGCACATCAGGCCACCCTTTATTTAATAAAGTTAAGGACACAGAAAAATAATAGTG  
GCTACCAGGGAGGTTCTACTGATGACAGACAGAATACTTCCTTTGATCCAAAACAGGTTTC  
AAATGTTTATAGTAGGATGTGTTCCCTGTTTAGGGGAACATTGGGATAGAGCTCCTGTTT  
GTGCATCAGAAGAAAATAACCAAGCTGGAAAATGTCCTCCATTAGAACTTAAAAATACTG  
TGATTGAAGATGGAGACATGTTTGATATAGGCCTTGGTAATATAAATAACAAAGTGTTAT  
CGGTTACTAAGTCAGATGTCAGTTTAGACATAGTGAATGAAACCTGCAAATATCCAGATT  
TTTTAACTATGGCCAATGATGTATATGGCGATGCATGTTTCTTTTTTGCAAGACGAGAGC  
AATGTTATGCTAGACATTATTTTGTTAGAGGAGGTGCAGTAGGCGATGCTATTCCTGACG  
AAGCTGTCAATCAGGATCATAACTTTTATTTACCAGCACAAACAGGCCAGCAACAACGTG  
TTTTAGCAAAATTCACATATTTTCTACTGTTAGTGGCTCTTTAGTAACTTCAGATGCTC  
AATTATTTAACAGACCGTTTTTGTTACGAAGGGCACAAGGCCACAACAATGGAATATTGT  
GGGGGAATCAAATGTTTATTACTGTTGCTGATAATACAAGAAACACTAATTTCCACCATAA  
GTGTTACTTCTGATGGTAGTACTATAACTGAATATAATACACAAAATATTAGAGAATTTT  
TAAGGCATGTAGAAGAATATCAATTAGCTATTATATTACAACATATGTAAAGTGCCTTTAA  
AGGCTGAGGTATTAACACAGATAAATGCAATGAATGCAGGTATTTTAGAAGAGTGGCAAC  
TAGGGTTTGTCCACACCAGACAATGCTGTGCATGATATTTACAGATATATTGACTCTA  
AAGCTACTAAATGTCCTGATGCAGTTGCTCCAAAGGACAAAGAAGACCCATTTGGAAAAT  
ATACATTTTGGAAACGTAGATTTTAACAGAAAAATTGTCTTTAGATTTAGATCAGTATCCTT  
TAGGAAGGAAATTTATATTTTTCAGGCAGGTTTACAAAGACGTCCCAAAACCATCAGATCCTT  
CTGTAAAGGATTTCTAAAGGTACCAACGCACAAACGCACATGACCGATTTTCGGTTTCTAATA  
AACAAATAAACTAATAAAGGTATGTGAAGTATTTTTTACCATGTTTCGTGACTAAACCGTAT  
AGGTCATTGCCAACAACCGCACCCGGTTAATCAGATATAAAGTGCACCTGGTGCGATTTT  
ATCACCGCTTTTGTGGAAGCACCCGAGGCGCCCGCCAGAAGTCTGCTGC

>gi|2911558|emb|Y15175.1|\_HumanPapillomavirus\_type\_77\_E6,\_E7,\_E1,\_E2,\_E4,\_L2,\_a  
nd\_L1\_genes

TATAAACTATAACCTTTATATTTAAAAAGTAGGGAGGGACCGAAAACGGTACGACCGAATG  
AGAGACATATAAAAAGGCGTCAGTACAGCCTGGCAGTAGCTATGTCTACAAGTGATGGAC  
GTCCAAAAAACATATTCCTGTTGTGCAGAGACAGTGAATACCGTTTCGACGACCTTCGCC  
TACTGTGTGTGTTCTGCACAAAAGAATTAATACTACTGCTGAACTGGCAGCATTTACAATTA  
GAGAATTAAATGTGGTGTGGAGAGGTGGGGCGCCGTACGGTGCATGTGCACGGTGTTTAC  
TGCTATATGGCATTGAGCGGCGCCTGAAACACTGGGAGTATTCTACTACGTGGACGGCG  
TGGAGGCAGAAACAAAAGAATCCATAGATACCCAGCAAATCAGATGCTACATGTGTCACA  
AACCCTCACCAAAGAGGAAAAGGACAAACATCGAAACGAAAAGCGAAGACTACATAGAA  
TCTCCGGACACTGGAGAGGGAGTTGTCTGCATTGTTGGTCACGATGCATGGGCCAAAGCC  
GACAGTAAAAGATATTGAATTGGATCTTGCACCAGAGGCCGTCCCTTTACTATGCAATGA  
GCAATTAGACAGCTCAGATGAAGAAGATTGTATAGATGTTGTGGAACCAGCACAAACAGGC  
GTACAGGGTGGTAACCTTTGTGTACAAAGTGTAAGTTCAACACTGCGACTGGTGGTAGAGAG  
CAGCGAAGCAGATATAAGGGCATTCCAGGAGCTCCTACTACGCACATTGAAGATCGTGTG  
TCCTCGCTGTGCGTAACGGGTTCATGGCTGATAACTCAGGTACAGAGGGGGAGGAGGAGGA  
CTGTTTCAGAGGCGGAACGGGCTGGGGGATGGTTTATAGTTGAGGCCATTGTAGATAAACG  
TACGGGGGACACAATATCCAGTGATGAGGATGAGGAGGGTGAGGGTGAAGACATGGTAGA  
CTTTATAGACGATAGACCTATAGGGGACGGACAGGAAGTAGCACAGGAACTGTTGCTGCA  
GCAAGCAGCTGCGGATGACGATGTAGCAGTGCAGGCTGTAAAACGAAAAGTTTACTCACAG  
TCCCTATTTACAGCCCTTTGTGTGTGGATCCAGCATAGAACATGAGTTAAGTCCCAGGCT  
AGATGCCATAAACTGGGCCGAGAGTCCGCAAAGGCCAAGCGGAGGCTATTCCAACCTACC  
GGACAGTGGGTATGGCCAAACACAGGTGGATACGGACTCGGGACCAAGCCAGGTACAAGA  
TATTTGTGAGGCGGGAGGACAAGATGGCCGCCAAACCAATACGGAGGGGAGTGGTACAGA  
GCAAGGGGAAAAATGTCAGCGAGAGGAGGAGCGTGCAGGAGGGGATGGGGAGGAATCGCA  
ACCCCTAGAGTGCGAAGAACAGAGAGAGGAGCATGTGGTGTGTTGTCTATACTGAAAGCTAG  
TAATCAGAGGCAACTCTACTAGGTAAGTTTAAAGAGCAATTTGGACTGGGATATAATGA  
ACTGGTAAGGCATTTTAAAGTAATAGGACAGCATGTGCAGATTGGGTAGTGTGTGATT  
TGGGGTATACTGCACAGTGGCTGAGGGTATAAAACAGTTAATACAGCCACTATGCGATTA  
TGCACACATTTCAAGTGCTACCCTGTGCTAGTGGGGGATGACAGTGTTGATGCTACTGCGGTA  
CAAACGTGCCAAAAACAGAGAGACAGTTGCAAAGGGCTTAAGCACGTTATTAAATGTGCC  
AGAAAGCCATATGTTGATTGAACCACCCAAGTTAAGGAGTGGCCCAGCAGCATTTGTATTG



GTATAAGACTGGTATGTCTAATATTAGTGAAGTGTATGGAGACACTCCGGATTGGATAGT  
AAGACAAACAATTGTGGGACATGCTTTAGAAGAGACACAGTTTCGGTTATCAGACATGGT  
ACAGTGGGCATACGATCATGACATAACAGACGAAGGAACGTTGGCATATGAGTATGCATT  
AATAGCTGAGTTCGACGCTAATGCAGCAGCATTTCCTTGCCAGCAATTGTCAGGCCAAATA  
TGTGAGGGACGCCTGCACAATGTGTAGACATTACAAACGGGGAGAGCAGGCACGTATGAC  
TATGTCCGAGTGGATAAAAATTCAGAAGTGATAAAATACAGGGCGACGGGAACCTGGAAACC  
CATAGTACAGTACTTAAGATATCAGGATGTAGAATTTGTACCATTTTTATGTGCCTTAAA  
GTCTTTTCTACAAGGCATACCCAAAAAAGCTGTTTAGTCTTTTATGGGCCTGCGGACAC  
AGGAAAGTCATATTTTTGCATGAGTTTGCTAAGATTTATGGGCGGTGCTGTTATTTTCATA  
TGCTAATTCAACCAGCCATTTTTGGCTGCAGCCATTGTCTGAAGCCAAAAATGGGTTTACT  
GGACGATGCAACCAGTCAATGTTGGAACATATAGATACATATTTGAGGAATGCATTAGA  
TGGGAACGTAATATGTATTGATAGAAAACATAGGTCCCTGTTACAACATAAAATGCCCCGCC  
ACTTTTAATAACCACCAATGTAAATCCATTGGAGGATGAGAGATGGAAGTATTTGCGCAG  
CAGACTGCAGGTGTTTACATTTAAAAACAAATTTCCAGTAACAAGTAGTGGAGACCCACT  
TTATACACTAAATGATCAAAATTGGAAATCGTTTTTTCAAAGGTTATGGGCACGTTTAAAG  
ACTTACCGATCCTGACGACGAGGAGGAAAAATGGAGAACCTAGCGAGCCGTTTAGATGCGT  
GCCAGGACAAAAATGCTAGAACTCTATGAAAGAGATAGCGACAAACTTGAGGACCAGATAA  
TGCCTGCTGCTTATGCGCCTAGAGAGTGTGTTGTTGTATAAAGCAAGAGAATGTGGAA  
TGACACATATAGGCCACCAGGTGGTGCCAAACACTTAGTGTAGCCAAAGCAAAGGCATGCA  
GTGCCATTGAAATGCATGTAGCCTTACAACAATTGCAACGAAGTGCATATGCACATGAAC  
CATGGACACTACGGGACACCTCAGCAGAAATGTGGGATGCAGCCCCCAAGAGGTGCTGGA  
AAAAAAGAGGAGTGACTGTGGAAGTTAGATATGATGGAGACGAGACCAAAGCAATGTGCT  
ATGTACTATGGAAGGAACATAAGTACAAAAATGTTAGTGATGACCAGTGGGTAAAAGTAG  
CAGGTCACGTCTCATACGAGGGTCTATACTATGTGCATGAAGAGGAAAAAGTGTTTTACG  
TGAAATTCAAAACGGACGCTCGTGTGTATGGGGAAACAGGCAGATGGGAGGTGCATGTGG  
GAGGCAAAAGTCATTACACCACAATGCATTTGACCCTGTATCTAGCACACGAGAAGTACCCG  
CTACTGGACCTTTGTACCCAGAGTACAACACCACCCACGCGCCACCCAAGCCCCGTTGG  
GGCTTGAGGAGGGACCGGAACGGAACGACGCAGGCCTGAAGCAGTCGGGCCGGGGCAGC  
AGCAGCAGCAGCAGCAGCAGCAGCAGCAACAGTGGCCCCCGACCCAGACCCCTGCCG  
CGAAAGCCAGTGACCGAACGGGTGGACCATTGGACAGTAACAGGACCCGGGACTGTGACT  
CTACAAGTCAAACTCCATCAGGACACCAAGTGACCTTGACTGTGCACCTGTAATACACC  
TACGAGGTGACCCAAACAGTTTTAAATGTTTTCGATATAGATTGAAAAATGGTAAAAAAG  
ATCTGTATTGTAGGGCCTCGTCCACGTGGCGGTGGTCCTGCGAACCAGAAAACCAAGCAG  
CGTTTGTAACAATATGGTACACCAGTTATACACAGCGCGATGAATTTTTGGCCACTGTCA  
AAATACCACCAAATATGCAGGCCATTTTAGGCCACATGTCTGTATTTACATAGAAGTGTG  
CTACACTGCTATTTAGCCCTGGATTTCTATTTGTGCAGGCTGTATTTTTGGGTGTATTTT  
GTGTTGCTGCTGTGTCTGTGCTGGCTGTGTGTGCTTTCTGCACTAACCTGCTATCTGGCT  
TTTGTGTTGTGTTTGTATTTAGTATTGGTGGCCTTTATATTTACAGGTTGTTTCTCGCATT  
GCACGCAATAATCAGTAACACTACCATGTATCCTATCATAATTACCGATGGGGATGGGGA  
CCGTCTGTGTTGTTGTTTGGAGCCGGGGGATGTATATGTGTTGGGTTTGTAAACTGT  
TGTATGCTTATTATTGTTTATTGTATATAGACACTTGGGATTATTGTAATGTTGTATGCT  
GCACTTATAGATGTGGTGTACTTGTATTTATACAGTGGCCATTGGATTGTGTATGTGTAC  
TTGCTTTTGTACCACTTTTTTTTGTGTTTGTGTTTTTGTGTTTTTCTTTGCAGTTGAATAAA  
GCAACCATGGTGGCACATCGTGCAAGGCGTCGCAAGCGTGCATCCGCCACAGAGCTTTAT  
AAAACCTGCAAAGCAGCAGGCACATGCCCCCTGATGTTATTTCCCAAGGTTGAGGGCACT  
ACGCTGGCTGACAGGATATTACAATGGGGCAGTCTTGGTGTGTTATTTAGGCGGGTGGGT  
ATTGGCACTGGGACAGGCACTGGGGGTGCGACTGGCTATGTTCTTATCGGCACCCGGCCT  
GGAAGTGTAGTTGATGTGCTGTTCTTACCAGGCCTCCTGTGGTTGTGGAGCCTGTGGGC  
CCTACGGATCCCTCCATTGTTTACTCTGTGGAGGAATCTAGTGTAATTGATTTCGGGTGCT  
TCTATACCCACCTTTACTGGTACTTCTGGATTTGAGATAACCTCCTCTGCCACAACCACT  
CCTGCTGTATTAGACATTACCCCTGCAGGTGACACTGTAGTAGTTACTAGCACAACTTC  
ACTAATCCTTTGTATACTGAGCCGTCACTGGTAGAAGTGCCACAAACTGGAGAAATTTCT  
GGACATTTGTTGGTTAGCACAGCCACTTCGGGTACCCACGGGTATGAGGAAATTTCCCATG  
GATACGTTTGCCACCTCTGGAACGGGGTCTGAGCCCATCAGTAGTACTCCTGTACCTGGT  
GTTAGTAGGGTTGCAGGTCCACGCCTATATGGCAAGGCCATGACACAGGTTCCGGGTGCCT

GATCCTGCCTTTTTGTACGTCCTCTTCTTTTGTGACATTTGACAATCCTGTGTATGAT  
CCCGGGGATGAAACCATTATTTTTTGAGCGTCCCTCGCCTGGTACTCGTGTGCCCCGACCCC  
GATTTTCTTGATATTGTCAGGCTGCATAGGCCTGCCTTAACATCTCGCAGGGGCACTGTG  
CGCTTCAGTAGAGTAGGTCAAAGTTTAGCATGCGTACTCGCAGCGGCACACAAATTGGT  
GCCAGGGTCCACTATTATCATGACCTTAGTCCCATTACTCACACCGAGGACATAGAGCTA  
GAACCACTACTCCCTCCTGCAGATTCTGCTGCTGAGGATTCAATTATATGATGTGTATGCT  
GATGTAGACGATGCTGACGTGGCCTTTACGAACAGTGGTCGCAATCTTACCTCTTTTGGG  
GGTCGCGGTGCATCGTCTCCCTCCCTTCTGCACTGTCCACTAAGATTGGCAATGTAACA  
ATTCCATTTATATCTCCGGTGGATGTGCATTTACACACTGGCCCCGACATTGTTTTGCCT  
TCTTCTGCACAATGGCCTTTTGTTCCTGTATTACCTGCTGACACAACACATTATGTGTAC  
ATTGATGGAGGCAATTTTTATTTGTGGCCTGTTACCTTTTCTGTGTCTCGGAAACGTGCG  
CGTAAACGTCTTTCATATTTTTTTGTCAGATGGCACTGTGGCGCTCTAGTGACAACCTGGT  
GTACCTGCCTCCCACCCAGTATCCAAAGTTATCAGCACGGACGACTATGTGACACGCAC  
AAATGTGTATTATTATGCAGGCAGTTCTCGCCTGTTAACTGTAGGTCACTCCCTATTTTGC  
TATTCCCCAAACTTCTGGTACTAAGGTGGATGTGCCTAAGGTATCTGCATTTCACTATAG  
AGTATTTCTGTGTCCTGCTGCCAGACCCCTAATAAGTTTGGTTTGCCTGATGCTCGTATATA  
TAACCCCTGAGGCCGAACGTTTGGTTTGGGCCTGCACTGGTGTGAGGTGGGCCGCGGACA  
ACCTCTAGGCGTGGGGTTAAGTGGACACCCCTCTGTATAACAACTGAATGACACTGAAAA  
CTCCAACATGTCACATGCTGACAATAGTCCCTGACTCCCGGGACAACATTTCTGTTGACTG  
TAAGCAACACAACTGTGTCATACTGGGCTGTACGCCCCCATGGGGGAATACTGGGGTAA  
GGGTACCCCTTGTGCACGTACTAATACTACCCAGGAGACTGTCTCCCTTGGAGTTAAT  
GACATCTTATATTCAAGGATGGCGACATGGTGGATACCGGGTATGGTGCCATGGACTTTAC  
TGCCCTGCAATTTAATAAGTCTGACGTGCCCTTGATATTTGCCAGTCTATTTGCAAATA  
TCCCGATTATTTGGGCATGGCTGCCGACCCGATGGCGATAGCATGTTCTTTTCCCTCCG  
TCGGGAACAACGTTTTGCCAGACACTTTTTCAATCGTGCGGGTGATGTTGGAGACAAAAT  
TCCAGAATCTTTGTACCTCAAAGGGAGTAGCGGGCGTGAGACTCCCGGCAGTGCTATATA  
CAGCCCCACACCTAGTGGGTCTATGGTGACCTCTGAGGCACAAATATTCAATAAGCCTTA  
CTGGCTACAGCAAGCTCAGGGACACAACAATGGCATATGCTGGGGAAATCAAGTGTTTTT  
AACTGTGGTAGACACCACACGCAGCACAAATATGTCTCTCAGTGCCTCCACTGAGTCTCA  
AACCCCATCTACCTATGATGCCACTAAAATAAAGGAATATTTAAGGCATGGGGAGGAATA  
TGATTTGCAGTTTATCTTTCAGTTGTGTAAAGTAACATTAACACCTGAAATTATGGCCTA  
TATTCACACTATGAACACTGCTTTATTGGAGGATTGGAATTTTGGACTGACATTGCCACC  
TTCTACTAGTCTGGAAGACACATATAGGTTTGTAAACGTCTCTGCCATTACATGTCAAAA  
GGATGTGGCCCCCACTGAAAAGCAGGACCCCTACGCAAAGCTTAATTTTTGGGATGTGGA  
TTTAAAGGATAGTTTACTTTGGATTTGTACAGTTTCCTCTGGGACGCAAGTTTTTTATT  
ACAGATTGGTGCAGCAGTCTGTTCCGTGGTTCCTCTCGCAAACGCCGGGCGCCACCCC  
CTCCCCAGCTTCGACCAAACGGAAGCGCTCCAAAAAGTGACCCATTGTTGTTTGTATGT  
GTATGTATGTTTACGACAACCTATGTATGTGTACTGTGTATTGCATGTGTTTGTATGGTA  
TGTGTGTGTATACAACAACCTATGTATGTATGTGTATATGTGTTAATAAACTGTGTACAT  
AGTTATATATTTTATACATATAATTGCTTGCTCTGTGAGTAAGAATAAACTTGTAGGTC  
AGAAGACCCAATTCGGTCTAAGATGGCCGCTGTGCAGGTGTGCAAACTAATTAGTC  
ATATTATTCAATTTCCCTGCAACATGCCGTCTCACGCACCTTTTTGGCAGCACTTTTCTGC  
TTTCCACTGTTTATTTTATTGCTGTATCATTCATCTTGGCTTGCCACCACATACACATTG  
CAATTTTGCTGCTTCTAGGCACCAAGTTATTATGACTACTTTCACATAATTACTGTCTTG  
GCTGCCTTTTCTAGGTTATCTTTCCAATAAAACATGTTTGCAAATCCCCACCTTTACATT  
GTGTTTCCATGACACATCTAATCCGGTTCGCTGCTTGTCTTCCAACCTAATTAATGCGGT  
TGCTTCACCTGTCTTTCTAACCATAAAT

>gi|2911551|emb|Y15174.1|\_Human\_papillomavirus\_type\_76\_E6,\_E7,\_E1,\_E2,\_E4,\_L2,\_a  
nd\_L1\_genes

CAGATTTGTTCCAACAACGATTTTGGCGCGAACATTTTGGCAGCAGAAGAGCGACGGTAA  
CGGTAAAGTTTCAACCGGGTGCGGTCAAAACAACCTTACTCATCATAATGGTTGCCAACAAC  
AATCATCGAAACAGATCTTTATGTAACCACATAAGTTGTTTTCACTCTTTTATTCTTGGA  
AAGAATAGATACAGGACACATGGCTAGACCTGCTAAGGTATGTGAGCTTAGCCAACCTCTT  
AAATATACCCATTTCTTCTATGCTGATACCCTGTAACCTTTTGACAGGGTTTCTGACCTA  
TTGGGAACCTCTTAGAGTTTGATTATAAGGACTTCCATTTAGTGTGGAAGGACGGATTTTG

CTTTGGTTGCTGTGCTAAGTGTGCTTTTGCATCTGCCTACCACGAGTTTACACAGTACCA  
TCAGGAAACTGTGGTAGGCATAGAAATAGAAGGCAGAGCTGCAGAAAATATAGCGAACAT  
TATAATAAGGTGTCAATTTTGTGTTGAAACGCCTGGATTTATTTGAAAACTTGATCATTG  
TGCACAGCAAAGAGAGTTTCACAAAGTTAGAAATAGGTGGAAAGGGGTGTGTAGACATTG  
CAGAGTAATAGAATGATTGGGAAAGAGGCTACATTACCTGACATTGTGCTACAAGAAGAG  
TTTGGCCAGCCATTGACCTGCAATGCTACGAGAACCTACCAGCTGAAGTGCCAGCTGAA  
CAAGACACAGAGGAGGAGCTTATCCAAGGCATCCCTTACAAAGTGATTGCTTGCTGTGGC  
GGCGGATGCGGTTCTAGACTTCGTGTGTTTGTGCTGGCTACTGATCGGGCCATTTCGAGAA  
TTTCAATCTTTACTGCTAGAGGAGTTGCAATTCCTGTGTCCGGAGTGTCGTGAAGAGATT  
CGCAATGGCGGACGATAAAGGTACTGACCCATAAGAAGGGTGTAGTGAAATGGTTCCTTAGA  
TAATGAAGCAGACTGTAGTGATTTAGAAAAATGACCTTGAGCAGTTATTTGATGAAAGTCC  
ACAGTCCAATATATCAGAATTAATAGATGATGATGCGGACGTGGAGCAGGGAAATTCGCG  
AGATCTGCTTCGCCAGCAGGAATTTGAGGAAAGCGCGGAGCAAGTGCAAAAGTTAAACG  
AAAGTATTTCACTCCTAAAGCAGTGCAACAACCTTAGTCCACGGTTGCAGTCTTTGTCTAT  
ATCTCCGCAACAAAAGTCTAAACGGAGGCTGTTTGAGCAGGACAGCGGGCTGGAAGTGTG  
GGGTTGTGAACAACTTTGTCTAATGAAGTTGAAGATATTACTACGGAGCTGGAGGTACC  
AGCGGTGCCGCCGCGCAGAGCAGGGTGGCCAGGGATCGGGAAATTTGCATTATAAGAATT  
AATGCGATGCAGCAATAGTCTGTGCAAGATTATTAAGTAAAGTCAAAGAATATTTTGGTGT  
AGGATTTTATGAGTTAGCTAGCAATATAAAAGTGATAAAACATGTTGCAGAGACTGGGT  
AGTTGGAGCCTATGGAGTGGCGGAGGAATGCTAGAAAGGTGCAAAACAATTACTTATTAA  
TCATTGTTCTTATGTGTGGATTAACATAAAATGGGATTATGTCATTATTCTTGCTGTGTTT  
TAACAATGCTAAAAGCAGAGAAACTGTGGGAAGATTGCTGATGTCAATGCTTGATGTACA  
ATTATTGCAACTAATATGTGAACCTCCCCAACTTAGAAGTGTGGTGTGACATTATATTG  
GTATAAAGGTAGTATGGACTCATCTGTGTATGCTCACGGAACCTATCCTGATTGGATAGT  
AAATCAGACCATGTTAACACATCAGGCTGCAGCAGAAGCTGTGCAATTTGACTTATCTGA  
AATGATACAATGGGCCCTATGATACAGATCTCACAGATGAAGCTGACATTGCATATGGATA  
TGCTAAGATGGCTGAGTCTGACTCAAATGCCAGAGCTTGGCTAGCACATAATAGTCAAGC  
AAAATTTGTAAGAGAATGTGCACAAATGGTCAGACATTATAGACGGGGAGAGATGAGAGA  
TATGAGTATATCAGAGTGGATTCTATTATAGGATAGAACAAGTAGAGGGTGAAGGTCATTG  
GTCTGAAATTGTAAAGTTTATTAGATATCAAGGAATAAATTTTATATTATTCCTTGATGC  
ATTTAAGCAATTTTTGCATGGGAAACCCAAAAAAGTTGTTTATTAATTTATGGACCGCC  
CGATTGTGGTAAATCTATGTTTGAATGTCATTAATAAGAGTGTGAGAGGGAGGGTAAT  
ATCATTGTGTAATGCAAAAAGTCAATTTTGGTTATCACCTCTTGCAAGATGTAAATAGG  
TTTATTAGATGATGCCACTGATCCATGTTGGCAATATATAGATACATACTTAAGAAATGG  
CATTGATGGTAATATTGTAAGTGTGGACTGTAAACATAAACTCCATTACAAATTAGATT  
TCCTCCTCTTTTAATTACATCAAATTATAACATCAAGGACAATGATAAATACAGATACCT  
GTATAGCAGAATTGTGATATTTGAGTTTAAACATAAGTTTCCATTTAAAGAGGATGGTTC  
ACCTGAATTTCTCCTTACTGACCAAAGCTGGAAATCTTTTTTTAAAAGGCTTTGGAATCA  
ATTAGATCTCAGTGACCCTGAAGACGAGGCAGAGAATGGAGGCACTCAACGATCGTTTCA  
ATGCACTACAAGACAAATTGATGGACATTTATGAATCAGGGAAAGATGATCTTGAAACAC  
AAATAGAACATTGGAATTTGTTAAGACAAGAACAAGTGTGTATTATTATGCACGCAAAA  
AAGGCGTGTAAAGACTTGGGTATCAACCTATTCACACTTGCAACCTCCGAAACTAAGG  
CTAAAGAAGCAATTGGAATGATGCTTACACTGGAGAGTTTGCAAAAATCTCCATTTGGAA  
AGGAACCATGGACTTTAGTAAATACCAGTCTTGAAACATATCGCACCCACCTATAAACT  
GTTTTAAAAAGGGCCCTGTAAATATAGAAGTAAGATTTGATGAAGATCCTGAAAATATAA  
TGTTGTATACATCTTGGACATATATTTACTTTCTAGATGCAGAAGATCAATGGCAAAAAG  
TAAAAGGGGAAGTGGACTATTTAGGTGCTTTTATAAGGATGGGCCACATAAACATTATT  
ACATAAACTTCAATGATGATGCCCTTAGATATGGGACATCAGGCCAGTGGGAAGTAAGAA  
TTAACAACGAAACTGTGTTTGTCTCCTGCTAGCTCCACACCACCGGCCGCGGAGCTAC  
GGGATCCTCCAACGCCAGCCCCGTTCCCGCCCCCGACCACACCAGGTCCCAGACGCCCA  
CCAGCACCACAGGAACCACCACAACCTACAGCACCACCAGCGTTAGCACCAAGGGAGCAC  
CAGAACTCGCATCCAAAGCCAACACCAGGAAAAGAAGGTACGGAAGAAAAGACTCTAGCC  
CTACAGCCACCTCCAGGAAAGAGGTCTCGCGGAGACGCTCCCGGTCCAGCACCAGGACCC  
GGGCAACCTCCAGAGCAAGGGCCATCAGAGTCAGATCCCAAAGACCCAGCCGATCCAGAT  
CGCGATCCAGATCCCGAGAATCCAGAGGATCCAGAGGATCCAGAGGGTCCAGCAGCTCCA

GAGGATCCTCCAGTCGCAGGGGCCAGCGGGGGCGGGGAGGGGGAGGTCTGAAGGGCATCCA  
CACACACACCCACCCCCAGTCCCCACAAACGGTCACAACGGAGAAGTAGGTCCCGAGAAC  
GGGGAACCGGAGCCATTTCTAACAGGTCTGGCATCTCGCCTGACAAGGTGGGATCTGCAG  
TACAAACAGTTAGTGGACGACATCTTGGAAGACTTGGAAGGTTACTGGCAGAAGCTAGCG  
ATCCTCCAGTAATACTTTTACGAGGTGATCCAAATGTGTTGAAATGCTTTAGATACAGAG  
ATAAAAAAATAAGAAGGGATTAGTAAAATGTTATAGTACCACATGGTCCTGGGTGCATG  
CAGACGGTAATGAGAGAATAGGTAGAGCTAGAATGCTTTTAGGTTTTACTTCTCAGCAGC  
ATAGAGCACAGTATATTAGTTCCATGAAATTGCCTAAAGGTGTAGAGTGGTCCTATGGTA  
ACTTTGATAGGTTATAACATTAATTAACCTACTAACCTTGCTTGCACTACTAATATATTA  
ACATTTTATATTTTTTTTACTATGGTCCGTGCTCGCAGAACAAAAAGAGATTCTGTAACAC  
ACATTTATCAAAGCTGCAAAGCAGCTGGAACCTGTCCTCCGGATGTTTTAAATAAAGTGG  
AACAAACAACAATTGCTGACCAGATTTTAAAAATATGGCAGCAGTGGTGTTCCTTTGGTG  
GTTTGGGTATAGGCACAGGTCGTGGAACCGGAGGCAGTACTGGCTATGTGCCATTAGGTG  
AGGGCCCCGCCATTCGTGTTGGGGGCACTCCAAATGTCATTTCGGCCTAGTGTGATACCCG  
AGGCTATTGGGCCCTGTGATATCATACCTATTGACACTGTCAATCCAATTGACCCAACTG  
CATCATCTGTGGTCCCACTCACTGAAACAGGACCTGATTTGCTGCCTGGGGAAATTGAGA  
CAATTGCAGAAGTGAACCCCTGCCCCAGATATTCCTAGAGTTGACACATCTGTTGTGACAA  
CAAGTCGTGGCACTAGTGCAGTGCCTGAAGTTGCTCCTGAACCAGTACCTCCTACACGGA  
CACGTATATCAGAACACAATATCACAATCCCTTCTTTTCAAGTACTTACTGAATCCACAC  
CAACATAGGGGAATCCGCATTGTGCAGACCAAATTGTAGTTACCAGTGGCTCAGGTGGCC  
AGGCCATTGGTGGTTCCAGATATGTGGAATAAGAGCTGGAGGAAATACCAAGTAGATATA  
CATTTGAAATAGAAGAACCACCCCTCCAAGACGCACAAGCACCCCTGTTCAAAGAATTA  
CACAAGGTATTAGTAATATTAGAAGGTCTCTATATAATAGAAGACTGACACAGCAGGTTA  
ATGTTACAGGATCCTTTATTTTTTACAACAACCTTCACGTTTGGTACGTTTTACGTTTGATA  
ATCCCGCTTTTGAAGATGAGGTTACACAAATATTTGAAAGAGATGTAGCTACTGTTGAGG  
AGCCACCTAATAGAGACTTTTTTGGATATAGCTAAACTAAGTCGTCCACTATATTCAGACA  
CTCCACAAGGTTATGTACGTGTTAGTCGTCTTGGTAACAGAGCCTCTATAAGGACTAGAA  
GTGGTGCTACTGTAGGGGCTCAGGTACATTTCTATAAAGACCTTAGTACTATAGATGCAG  
AAGAATCAATAGAATTGTCACTGCTTGGTGAGCATTACAGGTGATGCCTCTATAGTCCAAG  
GCCCTGTAGAAAGTACATTTGTTACATCAGATCTACAAGAATTGCCTGTTAATATTGTAG  
AGGAAACAGAACCCGAGTTTCATTCTGATGATTTATTGCTTGATGAACAAAATGAGGATT  
TTAGTGGATCTCAGTTAGTGTATGGTGCAGGCAGACGGTCCATTACATACACAGTGCCTA  
GATTTACAACACCCCGAGCAGATACATTTTATGTGCAGGACTTAGAGGGTTATACAGTGT  
CATATCCAGAAAGAAGGGATTATCCAGAAATAATTTATCCTCAACCTGACCTTCCTGCTG  
TTGTTATACATACATCTGATACATCTGGGGATTTCTATTTACATCCTAGCCTACGTAGGC  
GTAAACGTAAACGAGCTTATTTATAATATTTTTTTTCAGATGACTTCGCTTTGGTTACCAG  
CAACTGGTAAGGTTTATCTTCCACCATCAACACCTGTGGCCAGGGTTCAAAGCACGGATG  
AATACATTGAAAGAACAGACATCTACTATCATGCAAATAGCGATCGCCTCCTTACTGTAG  
GCCACCCATATTTTGATGTTAGAGACACTGGGGATTCAACAAAAATACAGGTTCCATAAG  
TATCAGGGAAATCAGTTTAGAGCATTTAGATTACTACTACCAGATCCCAATAGATTTCGCCT  
TGGTAGACATGAATGTCTATAATCCTGAGAAGGAAAGACTGGTTTGGGCCTGTAGAGGTT  
TGGAATAGGTCGCGGACAACCCCTAGGAGTAGGGTCTACAGGTCAATCCCTATTTAATA  
AAGTGAAGGATACGGAAAATGCTAATAATTATATAGTAACATCTAAGGATGATAGGCAGG  
ACACCTCATTTGATCCTAAACAGGTTCAAATGTTTTATTATTGGCTGCGCACCGTGCATAG  
GTGAGCACTGGGATGCAGCCAAGCCCTGTGATGCTGACAGAGGGGTAGGCAAATGTCCAC  
CTTTGGAACCTGGTAAATACTGTAATAGAAGATGGAGATATGGTGGATATAGGTTTTGGAA  
ATATAAATAATAAAACCCTGTCAGCAAATAAGTCAGATGTCAGTTTAGATATAGTTAATA  
ATATTTGTAAGTATCCAGACTTTTTTAAAAATGGCCAATGACATATATGGAGACTCCTGTT  
TTTTTTATGCTAGACGGGAGCAATGTTATGCTAGACATTTTTTTTGTAGAGGAGGTAATG  
TAGGAGATGCTATTTCCGTAGTGTGCAGTGGGTGAGGACAATAACTTTGTGTTGCCTGCAG  
CTGGTTGGACAGGCCCAAAACACTTTGGGTAGCTCTATTTACGTGCCTACCGTTAGTGGTT  
CTTTGGTATCCACAGATGCACAATTATTTAATAGGCCCTTTTGGCTACAACGAGCACAGG  
GTCATAACAATGGCATTGTTGGGAAAAATCAATTATTTGTTACTGTTGTTGATAATACTA  
GGAATACTAATTTTACCATAAGTGTTACCACAGATGGTCAAACACCAACTGATTATGATA  
GTACTAAAATCAGAGAGTTTTTAAGACATGTGGAGGAATATGAACTATCAGTTATTTTAC

AATTGTGTAAAGTACCTTTAGTGCCAGAAGTACTTGCACAAATCAATGCAATGAATTCCA  
ATATATTAGAAAATTGGCAATTAGGTTTTGTGCCTACACCTGACAATCCCATTTCATGACA  
CCTATAGATATTTAACATCCCAGGCCACTCGATGTCCAGATAAACAGCCCGCCCCCTGAAA  
AAAAGGATCCATATGAGCAATACAATTTTTGGCAAGTGGATCTAACTGAGAAATTGTCAT  
TAGATTTGGATCAATATTCCTTAGGACGCAAGTTTCTGTTTCAAGCAGGCCTGCGACGGG  
CTTCCAGAGTATCCAGGACAGCCACTGTCCGCACAGCATCCAGGGGAACCAAACGCAAAC  
GTTTCATGACCGTTTTTCGGTCACTGGGTCTCATAATAAAATATTTTATAAACTCTTTTGGT  
ATGTCAAGCATGTTTTAACCAGATTTCGTGACTAAGATTGATTAAGGCCATCTGCAACCGC  
ACCCGGTTAATCAGATTATAAAGGAGCGCCAGGGTTTACCTCAAGCAACTTGGCAGTTAC  
AACTTGTCTTCTGCCAGAAGGTCTGTCTGCCAACTTCCTTTTCCAATAAC

>gi|2911544|emb|Y15173.1|\_HumanPapillomavirus\_type\_75\_E6,\_E7,\_E1,\_E2,\_E4,\_L2,\_a  
nd\_L1\_genes

AACCATTTTGGCGCGAACATTTTGGCAGCAGAAGAGCAACGATAACGGTAAGTTTCAACC  
GGGCGCGGTCAAACTACTTACTCATCATTTATTGTTGCCAACAAACAATCACCGAAACAGA  
TATTTATGTAACCACTTGTGTTGTTACCACTTGTGTTGTTTTCACTCTTTTATTCCTTGG  
AAGAATACAGACAGAACACATGGCTAGACCTGCTAAGGTATGTGAGCTTAGCCAACTCTT  
AAATATACCTATTTACAAAATTTTGTACCTGTAACTTTTGCACAGGGTTCTGACCAC  
TTGGGAACCTCCTAGAGTTTGATTATAAGGACTTCCACTTGGTGTGGAAGGACGGATTTTG  
CTTTGGTTGCTGCTCAAAGTGTGCCTTTGCACTCGGCCTATCACGAGTTTACACAGTATCA  
TCAGGAGACCGTGGTAGGCATAGAAAAGGAGGAGCAGCAGAGCAAGAGTATACATAATCT  
TATTGTAAGGTGCCAGTTTTGTCTGAAACGTTTGGATATATTTGAAAACTTGATAATTG  
TGCACAGCACAGAGAATTCCACAAAGTTAGAAATAGGTGGAAGGGGTGTGTAGACATTG  
CAGAGTGATAGAATGATTGGGAAACAGGCTACATTACCTGACATTGTGCTACAAGAAGAG  
TTTGGCCAGCCCATTGACCTGCAATGCTACGAGGATTTAGCAGCTGAAGTGCCAGCTGAA  
CAACACTCAGAGGAGGAGCTTATTCAAGGCATCCCTTACAAAGTGATTGCTTGCTGTGGC  
GGCGGATGCGGTTCTCGACTTCGTGTGTTTGTGCTTGCTACTGATCGGGCTATTCGAGAA  
TTTCAAACCTTTGCTGTTGGAGGAGCTGCAATTCCTGTGTCCTGAGTGTGCTGAAGAAATT  
CGACATGGCGGACGATAAAGGTACTGACCTTAAAGAAGGGTGTAGTGAATGGTTCTTAGA  
TAATGAAGCAGACTGTAGTGATTTAGAAAATGACCTTGAGCAGTTATTTGATGAAAATCC  
ACAGTCCAATATATCAGAATTAATAGATGATGATGAGGACGTGGAGCAGGGAAATTCGCG  
AGATCTGTTTCGCCTGCAGGAATTTGAGGAAAGCGCGGAGCAAGTGCAAATGTTAAACG  
AAAGTATTTCAAGTCTTAAAGCTGTTCAACAACCTAGTCCACGGTTGCAGTCTTTGTCCAT  
ATCTCCGCAACAAAAGTCTAAACGGAGGCTGTTTGAGCAGGACAGCGGGCTGGAACGTG  
GGGTTGTGAACAAACGTTGTCTAATGAAGTTGAAGATATTACTACGGAGCTGGAGGTACC  
GGCGGTGCAGCCGGCAGAGCAGGGTGGCCAGGGACTGGGAAATTTGCACTATAAAGAGTT  
AATGCGATGCAGTAATAGTCGTGCCAGATTATTAAGTAAAGTTAAAGAATATTTTGGTGT  
AGGGTTTTATGAGTTAGCTAGGCAATATAAAAGTAATAAAACGTGCTGTAGAGACTGGGT  
TATTGGAGCGTATGGTGTGCGGGAGGAATTGCTGGAAGGTGCAAAACAATTACTTCTAAA  
TCATTGTTCTTATGTGTGGATTAATATGAATGGGATTATGTCATTATTCTTGTGTGTTT  
TAACAATGCAAAAAGCAGAGAACTGTGGGAAGATTACTAATGTCTATGCTTGATGTACA  
ATTATTGCAATTAATATGTGAACCTCCCAAACCTAGAAGTGTGGTGTGAGCATTATATTG  
GTATAAAGGTAGTATGGACTCATCTGTGTATGCTCACGGAACGTATCCTGATTGGATTGT  
GAATCAGACCATGTTAACACATCAGGCTGCAGCAGAAGCTGTGCAATTTGATTTGTCTCA  
AATGATACAATGGGCTTATGATACTGATCTCACAGATGAAGCTGACATTGCATATGGATA  
TGCAAAGATGGCTGAGTCTGATTCAAATGCCAGAGCTTGGCTAGCACATAATAGTCAAGC  
AAAATTTGTAAGAGAATGTGCACAAATGGTCAGACATTATCGAAGAGGGGAAATGAGAGA  
TATGAGTATCTCAGAATGGATTCATTACAGAATAGAACAGGTGGAAGGCGAAGGTCATTG  
GTCTGAAATAGTTAAGTTTCATTAGATTCCAAGAAATAAATTTTATATTATTCTTGATGC  
ATTCAAACAATTTCTTGCTATGGTAAACCAAAAAAAGTTGTTTATTAATATATGGACCGCC  
TGACTGTGGAATACTATGTTTGCATGTCATTAATAAGAGTGCTAAAAGGGAGAGTAAT  
ATCATTGTGTTAATGCAAAAAGTCAATTTTGGTTATCGCCTCTTGCAAGATGTAAATAGG  
ATTATTAGATGATGCCACAGATCCATGTTGGCAATATATAGATGCATATTTAAGAAATGG  
AATTGATGGTAATATTGTAAGTGTGGACTGTAAACATAAAACACCATTACAAATTAGATT  
TCCTCCTCTTTTAATTACATCAAATTATAATATTAAGGACAATGATAAATATAGATACTT  
GTATAGCAGGATTGTGATATTTGAGTTTAAGCATAAGTTTCCATTTAAAGAGGATGGTTC

ACCAGAATTTCTTCTTACTGACCAAAGCTGGAAATCTTTTTTTAAAAGGCTTTGGAGTCA  
ATTAGAACTGAGTGATCCTGAAGACGAGGCAGACAATGGAGGCACTCAACGATCGTTTCA  
ATGCACTACAAGACAAATTGATGGACATTTATGAATCAGGGAAAGATGATCTTGAACTC  
AAATAGAGCACTGGAAATGTTTAAAGACAAGAACAAGTGTTGTATTTTTATGCACGTAAAA  
AAGGCATACTAAGAATTGGGTATCAACCTGTACCCACACTTGCAGTATCTGAAACTAAGG  
CAAAAGAAGCAATTGGAATGATGCTTACACTGGAGAGTTTGCAAAAATCTCCATTTGGAA  
AAGAATCATGGACCTTAGTAAATACGAGTCTTGAAACATTTTCGTACCCACCTGCAAACT  
GTTTCAAAAAGGGGCCATTATAATATAGAAGTAAGATTTGATGGAGATCCTGAAAATATAA  
TGTTGTATACAGCATGGACACATATTTACTTTCTAGATGCAGAAGAACATTGGCAAAAAG  
TAAAAGGGGAAGTGGACTATCTAGGTGCTTTTTATAAGGATGGGCCACATAAACATTACT  
ATATACACTTCAATGATGATGCCCTTAGATATGGGACTTCTGGACAATGGGAAGTAAGAA  
TTAACAACGAAACTGTGTTTACTCCTGTTACTAGCTCCACACCACCGTCCGCGGAGCTAC  
GGGGATCCGCCAACACCAGCCCCGTTCCCGCCGCCGACCACACCAGGTCCCAGACGCCCCA  
CCAGCACCACAGGAACCACCACCACCTACAGCACCTCCACCGTTAGCACCAAGAGACCAC  
CAGAACTCACATCCAAAGCCAACACCAGGAAAGGAAGGTACGGAAGAAAAGACTCTAGCC  
CTACAGCCACCTCCAGGAAAGAGGTCTCGCGGAGACGGTCTCGGTCCAGAACCAGGACCC  
GGGGACGGGACGCGAGCACAAGGGCCATCAGAGTCAGATCCCAAAAACCCAGCCGATCCA  
GATCGCGATCCAGATCCAGAAATCCCGAGGATCCAGAGGATCCAGCAGCTCCAGAGGAT  
CCTCCCGCAGGGGGCGGGGGCGAGGGCGAGGGCGAGGGGATCCACCCCCCACA  
AACGGGCACAAAGGAGAAGTAGGTCCCGAGGACGAGGATCAGGAGCCATTTCTAACGGGT  
CTGGCATCGCGCCTGACAAAGTGGGATCAACAGTACAAACAGTTAGTGGAACATCTTG  
GACGACTTGGAAGGTTACTGGCAGAAGCTAGCGATCCTCCAGTAATACTTTTAAGAGGCG  
ATCCAAACATACTAAAATGCTTTAGGTACAGAGACAAGAAAAACAGAAAAGGGATTGGTTA  
AATGTTATAGTACTACATGGTCTTGGGTGCATGCAGATGGCAATGAAAAGATAGGTAGAG  
CTAGGATGCTTTTAGGGTTTACTTCTGAGCAGAATAGAGCAGAATATATTAATTCATGA  
AATTGCCATAAAGGTGTGGAATGGTCTACGGTAACTTTGATAGGCTCTAACATGTTTTAA  
CATACTAACTTGCTTGCACTACTAACATATTAATATTTTATACTTTTTTACTATGGTTCTG  
TGCCCCGAGAACAAAAGAGATTCTGTAACCCACATTTACCAAAGCTGCAAAGCAGCTGG  
AACCTGTCTCCAGATGTAGTTAATAAAGTGGAGCAAACAACAATTGCTGACCAGATTCT  
GAAATATGGCAGCAGTGGTGTCTTTCTTTGGTGGTTTGGGTATAAGCACAGGTCGTGGAAC  
TGGAGGCAGTACTGGCTATGTGCCATTGGGTGAGGGCCCCGGCATTTCGTGTTGGGGGCAC  
TCCAAATGTTATTCGGCCTAGTGTAATACCCGAGGCTATTGGGCCTGTGATATCATTC  
TATTGACACTGTCAATCCAATTGACCCAACCTGCATCATCTGTGGTCCCACTCACTGAAAC  
AGGACCTGATTTGTTGCCTGGGGAAATTGAGACAATTGCAGAAGTGAACCTGCCCCAGA  
TATTCCTAGAGTTGACACATCTGTTGTTACATCTAGCAGTGGCACTAGTGCAGTGCTTGA  
AGTTGCTCCTGAACCAGTACCTCCTACACGAACACGTATTTCAAGAACACAATATCACAA  
TCCTTCCTTTCAGGTGCTCACTGAATCCACACCAACATTGGGGGAGTCTGCATTATCAGA  
CCAAATCGTGGTCACCAATGGCTCTGGTGGGCAAGCCATTGGTGGTTCCCGCACTGTGGA  
AATAGAATTAGAGGAAATACCAAGCAGATACACATTTGAAATAGAAGAACCACCCCTCC  
AAGACGCACAAGCACTCCTGTTCAAAGAATTACACAGGGAATTAGTAACCTTAGAAGGTC  
TTTATATAATAGGAGACTCACACAGCAGATTAATGTGCAAGATCCTTTATTTTTACAACA  
ACCATCACGTTTAGTACGTTTCACATTTGATAATCCTGCCTTTGAGGATGAAGTTACACA  
AATATTTGAAAAGAGATGTGGCTACTATTGAGGAACCCCCAAATAGGGATTTTTTAGATAT  
AGCAAAGCTCAGTCGTCCAGTCTATTAGATACTCCACAGGGTTATGTACGTGTTAGTCG  
ACTAGGTAACAGAGCATCTATTAGAACCAGGAGTGGGGCTACTGTAGGAGCTCAGGTTCA  
TTTTTATACAGATTTAAGTACTATAGATACAGAGGAATCAATAGAATTATCACTACTTGG  
AGAACATTCTGGTGATGCTTCTATAGTACAAGGCCCTGTAGAAAGTACATTTGTAACATC  
AGATTTACAAGAGTTACCTGTCAATATTGTAGAGGAACTGAACCTGAATTTCACTTCTGA  
TGATTTATTGCTTGATGAACAAAATGAGGATTTTAGTGGATCGCAATTGGTATATGGATC  
TGGCAGCGGTCCATTACATATACAGTGCCGAGATTTCAGTACACCACGTGCAGATACATT  
TTATGTGCAGGATTTGGAGGGCTACACTGTTTCATATCCAGAAAGAAGGGATTATCCAGA  
AATAATTTATCCTCAACCAGACCTACCTGCTGTTGTTATACACACATCTGATACTTCTGG  
GGATTTCTATTTACATCCTAGTTTACGAAGGCGTAAACGTAAACGAGCTTATTTATAATA  
TTTTTTTCAGATGACTTCGCTTTGGTTACCTACAACCTGGTAAGGTTTATCTTCCACCATC  
AACACCTGTGGCCAGGGTGCAAAGCACGGATGAATACATTCAAAGAACAGACATCTACTA

TCATGCCAATAGTGATCGCCTTCTCACTGTAGGTCATCCATATTTTGATGTTAGAGACAC  
TGGAGATTCAACAAAAATATTAGTGCCTAAAGTTTCAGGAAATCAGTTTAGAGCATTTAG  
ACTGCTATTACCAGATCCCAATAGATTTGCATTAGTAGATATGAATGTCTACAATCCAGA  
AAAAGAAAGATTAGTATGGGCTTGCAGAGGCTTGGAAATAGGTCGAGGACAGCCTTTAGG  
GGTAGGTTCTACAGGCCATCCTTTGTTCAATAAAGTAAAGGATACTGAAAAATCAAATAA  
TTATATAACAATGTCTAAAGATGATAGGCAGGACACCTCGTTTGACCCTAAGCAGGTTCA  
AATGTTTATTATTGGCTGTGCACCTTGTATAGGGGAGCACTGGGATGCTGCCAAACCCTG  
TGACGCTGACAAAAGGAGACGGTAAATGTCCACCTTTAGAATTAGTAAATACAGTTATTGA  
GGATGGGGATATGGTGGATATAGGTTTTGGTAACATAAATAATAAAACCTTGTCAGCAAA  
TAAATCAGATGTCAGTTTGGATATAGTTAATAACATTTGTAAGTATCCAGACTTCCTTAA  
AATGGCCAATGACATATATGGGGACTCCTGTTTTTTTTTATGCCAGACGGGAACAATGTTA  
TGCTAGACACTTTTTTGTAGGGGAGGCAATGTAGGCGATGCAATTCTTAATGCTGCAGT  
GGGTCAGGACAATAATTTTATGTTACCTGCAGCCGCTGGGCAGGCTCAAAACACTTTGGG  
CAACTCTATTTATGTTCCACGGTCAGTGGTCTTTGGTGTCCACAGATGCTCAATTATT  
TAACAGGCCATTTTGGCTGCAACGAGCACAGGGTCATAACAATGGTATATGTTGGGAAAA  
TCAATTATTTGTTACTGTTGTTGACAATACTAGAAATACCAATTTTACCATAAGTGTAC  
CACAGATGGACAAACACCTACTGATTATGACAGTGGTAAAATACGAGAGTTTTTAAGACA  
TGTTGAGGAATATGAATTATCAGTTATTTTACAATTATGTAGAGTGCCTTTAGAGCCTGA  
GGTACCTTGCACAAATTAATGCAATGAATCCAAATATATTGGAATAATTGGCAATTAGGCTT  
TGTACCTTCGCCTGACAATCCCATCCATGACACTTATAGATATTTAACATCGCAGGCTAC  
TCGATGTCCAGATAAACAGCCTGCCCCGAAAAAGAAAGATCCTTATGAGCAATATACTTT  
CTGGCCTGTGGATCTAACTGAAAAATTATCGTTGGATTTGGATCAATACTCGTTAGGACG  
CAAATTCCTTTTTTCAGGCAGGCTTACGAAGGGCTTCCAAGGTAACCAGAACAGCCAGTGT  
CCGTTTCATCGTCCAGGGGAACCAAAACGAAAACGCACATGACCGTTTTTCGGTCACTGGGTC  
TTATAATAAAAAATTTTTATAAACTCTTGTGGTATGTCAAGCATGTTTTAACCAGTTTCGT  
GACTAAGATTGATTAAAGCCACCTGCAACCGCACCCGGTTAATCAGATTATAAAGGAGCG  
CCAAGGTTTACCTCAAGCAGCTTGGCAGTTACAACGTGTTTCCTGCCAGAAGTGTGTGTC  
TGCCAACCTCCCTGCCAATAACCGAATTTGTTCCAAC

>gi|1491692|emb|X94165.1|\_Human\_papillomavirus\_type\_73\_E6,\_E7,\_E1,\_E2,\_E4,\_L2,\_a  
nd\_L1\_genes

ACTATAATGTACTATTAAAAAAAAGGGTGTAACCGAAAACGGTTTCAACCGAAATCGGTG  
CATATAAAAGTAGGAAAGCAAAAAACGCTACAGATTGGGAAATGCTGTTTCCCAATTCAG  
AAGAACGACCATAACAAGCTACAAGCGTTATGTGACGAAGTGAATATTTCTATACATGATA  
TAAACCTGGACTGTGTGTTTTGCCAACGTGGACTGTACAGATCTGAGGTATATGATTTTG  
CATTTAGTGATTTGTGTATTGTATATAGAAAGGATAAACCATATGGTGTATGTCAACCGT  
GTTTAAAAATTTTATTCTAAAATTAGAGAGTATAGGCGATATAGACAATCAGTATATGGCA  
CTACGTTAGAAAATTTAACTAACAAACAGTTATGTAATATTTTAATAAGGTGCGGAAAAT  
GCCAAAAACCATTTATGTCCACTGGAAAAAGCAAAAGCATGTAGATGAAAAAAAACGGTTTC  
ATCAAAATAGCAGAACAGTGGACCGGACGCTGTACACGGTGCTGGAGACCATCTGCAACTG  
TGGTGTAAAGATGCATGGAAAAAAAACAACCTTGCAGGACATTACTTTAGACCTGAAACCA  
ACAACCGAAAATTGACCTTACATGTTACGAGTCATTGGACAACCTCAGAGGATGAGGATGAA  
ACAGACAGCCATCTAGACAGACAAGCTGAACGAGAGTGTACAGAATAGTTACTGACTGC  
ACGAAGTGTCAGTGCACAGTATGCCTTGCCATTGAAAGCAACAAAGCTGATTTAAGAGTG  
ATAGAAGAGTTGCTTATGGGTACACTAGGTATTGTGTGCCCAACTGTTCCAGAAACCTA  
TAAAAGAAGATGGCTGATTACAGGTAATTGGGAAGGGAGGTGTACGGGATGGTTTAATGTA  
GAAGCCATTGTAGAAAGAAAAACAGGGGATCCAATTCCAGAGGATGAAAAATTATGATGGA  
GGGGATACAGATGAGTCGGAAATGGGGGATTTTATTGATAATGCACATATACCAAATATA  
TATGCACAACAGGAAATTGCACAGGCATTGTATCAGTCACAGCAAGCAAATGCAGACAAT  
GAGGCTATACGTGTTCTAAAACGAAAGTTTACAGGTAGTCCTGGCGGTAGCCCAGATATG  
AAAAGAGATGAATTCATAGACAAACAGCTTAGTCCACAAATAAATGTATTGTCAATAAGT  
AGCGGTAGAAGTACATCTAAACGAAGACTGTTTGAGGAGCAGGACAGTGGATATGGCAAT  
ACTGAAGTGGAACCTTACGAGACAGAGGTACCGGGACTTGGGGCAGGGGTAGGGTGTTTA  
CAAAATGTTAATGAAGAAGGCAACCAAAATTGTGTGCCACGTGAAAGCAGTAGTGGGTCC  
AGTAGCATTTCAAATATGGATATAGAAAACAGAGACACACCTATAACAGATATTACAAAT  
TTATTACAAAGGAATAATGCAAAAGCAGCATTGCTAGCAAAATTTAAAGAAGTATATGGG

TTAAGTTATATGGAATTAGTTAGACCATATAAAAAGTGATAAAACACATTGCCAAGATTGG  
GTGTGTGCTGTGTTTGGTGTAATACCCTCACTTGCAGAAAGTTTAAAATCCTTACTAACA  
CAGTATTGTATGTATATACATTTGCAGTGTTTAAACATGTACATGGGGCATAATAGTGTTA  
GTATTAGTAAGATTTAAGTGCAATAAAAAATAGACTAACAGTGCAAAAATTATTAAGTAGT  
TTATTAATGTAACACAAGAACGCATGTTAATTGAACCTCCAAGACTACGAAGTACACCA  
TGTGCATTATATTGGTATAGAAGTATTTATCAAATATTAGTGAAATAGTAGGAGACACA  
CCTGAGTGGATTAAAAGACAAACGTTAGTGCAGCATAGTTTAGATGATAGTCAATTTGAC  
CTATCTCAAATGATACAGTGGGCATTTGATAATGATATAACAGACGACTGTGAAATAGCA  
TATAAATATGCATTATTAGGCAATGTAGACAGTAATGCAGCTGCATTTTTTAAAAAGTAAT  
GCACAAGCAAAATATGTAAAAGACTGTGGTACAATGTGCAGACATTATAAAGCAGCAGAA  
CGTAAACAAATGTCAATGGCACAATGGATACAACATAGATGTGATTTAACTAATGATGGT  
GGTAATTGGAAAGATATTGTGCTATTCCTAAGATATCAAATGTAGAATTTATGCCTTTT  
TTAATTACATTAAAACAATTTTTTAAAAGGTATTTCCCAAACAAAACCTGTATAGTATTATAT  
GGACCGCCAGATACAGGAAAATCACATTTTGGAAATGAGTTTAAATTAATTTATACAAGGT  
GTAGTTATTTTCGTATGTAAATTTCAACTAGTCATTTTTTGGTTATCACCCCTAGCTGATGCA  
AAAATGGCATTATTAGATGATGCAACACCTGGATGCTGGACGTACATAGACAAATATTTA  
AGAAATGCATTAGATGGTAATCCTATATGTTTAGATAGAAAACATAAAAAATTTATTACAA  
GTTAAATGCCCTCCATTACTGATAACATCAAATACAAATCCTAAAGCAGATGATACTTGG  
AAATATTACATAGTAGAATAAAGGTGTTTACTTTTTTAAATCCATTTCCATTTGACAGT  
AATGGGAACCCACTATACCACTTACTAATGAAAACCTGGAAAGCATTTTTTTACAAAAACG  
TGGTCAAAAACCTAGATTTAACAGAGGACGACGACAAGGAAAATGATGGAGACACTGTGCAA  
ACGTTTTAAGTGCGTGTGAGGACGCAATCCTAGAAGTGTATGAACGTGACAGTGTACACCT  
AAGTGATCATATTGATCATTGGAAACACGTGCGACATGAAAATGTATTATTACATAAAGC  
ACGTGAAATGGGACTGCAAACTGTTAAACAATCAAGCGGTGCCAAGCCTTGCAGTATCACG  
ATCCAAAGGGTATAATGCAATTGAAATGCAAAATAGCACTAGAAAAGTTAAATGAATCTTT  
GTATAACACAGAGGAATGGACATTGCAACATACAAGTTGGGAACCTGTGGGTACAGAACC  
TAAACAATGTTTTTAAAAGGATGGAAAAACAGTAGAGGTAGATATGACTGTGAAAAGGA  
CAATAGCATGCAATATGTATTTTGGACACATATATATTGTTGGTATGAAGGGGGGTGGGC  
AAAGGTAGGTAGCAAAATAGATTATAATGGTATATATTATGAAACAGATGATGAGGAAAA  
GGTATACTATACAAGATTTGATACAGATGCAAAACGGTACGGGGTAAAAGGCATATGGGA  
AGTACATATGGGTGGTCAGGTAATATGTTGTGCTCCTGTATCTAGCGCCTGTGAAGTATC  
CATTCCTGAAATTGTTAACCCACTGCACACCACAACCACCAACACCACCACCACCTGCAC  
CAACGTTGACACCGGTGTGCCATCACGGAACGGCAAAGACAGTGTGACTCGGACCAGAG  
GCCCCCTGGATTGTTTGCATAACCTACATCCCACCACAGAGTCCTGTACCCAGTGTACTAC  
ACATAATGTTGCGCCAATAGTGCATTTAAAAGGTGACAAAAACAGCTTAAAATGTTTTAG  
ATATAGATTGCATAAAGGCTATTCACATTTATTTAAAATGTAACAACAACATGGCATTG  
GACCAATACTACAAATAGTAAATGTGGTGTAATAACATTAATGTTTACAACTGTATTGCA  
ACAACAACATTTTTTTACAACATGTAAAAATACCACAACTATTGTTAGTTACATCAGGATA  
CATGTCTTTGTAACATTGGTTACACAGTATATATGATTCTTTGTATATTTGTATTTTTGT  
TTTGTGTTGGCTTTTGTGTTGTGCTTGTGTGTGTCGCTTGCAGTGTCTGTGTATATTTACC  
CATGGTTATTGGTATTGATTATAATAACCTTTATACATGTATCACAATCATTGTTAAAAG  
TATTTTTTTTATATGTTTTTGGTATTTTATATTCCTATGGCACTTGTACATTACCATGCTA  
CATTACAAATAACATAAACAATTTTACATATATAATAAACTGCCTAATATTTTTAGTGTA  
CCATGCGTCGCAAGCGTGACACACACATACGAAAAAACGTGCATCTGCAACACAATTAT  
ATAAAACATGTAAACAAGCAGGTACGTGCCCTCCTGATGTAATTCCCAAGGTTGAAGGTA  
GTACTATAGCTGATAATATATTTAAAATATGGTAGTATTGGAGTTTTTTTTTGGGGGATTGG  
GAATAGGTAGTGGGTCTGGATCAGGGGGGCGTACTGGATACGTTCCATTATCTACAGGCA  
CACCATCTAAACAGTTGAAATTCCATTACAACCTATACGACCATCAGTTGTTACGCTGT  
TTGGGCTTCAGATTCTTCTATTGTTTCATTAGTGGAAGAATCAAGTTTTATAGAGTCAG  
GTATACCTGGTCCCTACATCTATAGTGCCCTTCTACTTCAGGGTTTGATATTACAACCTTCTG  
TAAACAGTACACCTGCTATTATAGATGTATCTGCTATTAGTGATACTACACAAATATCTG  
TTACAACATTTAAAATCCAACCTTTACTGACCCATCTGTGTTGCAACCTCCTCCACCCT  
TAGAAGCCTCTGGCAGACTTTTTATTTTCAAATGACACTGTAACCTACCCATTTCATATGAAA  
ATATACCTCTTGACACATTTGTAGTTACAACAGACCACAATAGTATTGTTAGTAGTACGC  
CCATCCCAGGGAGGCAACCTGCTGCACGCTTAGGATTATATGGACGTGCAATACAACAGG



TTAAGGTTGTAGACCCTGCGTTTTTAACTACGCCTACACGTTTAGTAACATATGACAACC  
CTGCCTTTGAAGGCCTGCAGGATACAACATTAGAGTTTCAGCACAGTGACTTGCATAATG  
CTCCTGATTCTGATTTTTTTAGATATTGTAAAATTACATAGGCCTGCTTTAACCTCTAGAA  
AAACAGGCATACGTGTTAGTAGATTGGGACAACGTGCAACACTTTCTACTAGAAGTGGCA  
AACGTATAGGTGCTAAAGTACATTTTTATCATGATATAAGTCCTATACCTACTAATGATA  
TTGAAATGCAACCTTTAGTTACACCACAAACACCTAGTATAGTAAGTGGTAGTAGTATTA  
ATGATGGGTTATATGATGTGTTTTTAGACAATGATGTAGAAGAGACTGTACTACAACAAA  
CATATACACCTACAAGTATACATAGTAATAGTTTTAGTTAGTAGTGATATTTCTACTGCAA  
CTGCAAAATACAACCTATTCCTTTTTAGTACTGGGTTAGACACACATCCTGGTCCAGATATTG  
CTTTACCACTACCTTCTACAGAAACTATTTTTACACCAATAGTGCCATTACAGCCTGCTG  
GTCCTATATATATTTATGGGTCAGGTTTTATATTACACCCTAGTTATTATTTGTTAAAGC  
GCAAACGTAAACGTCTGTCATATTCCTTTACAGATGTGGCGACCTACTGATGCAAAGGTA  
TACCTGCCCCCTGTGTCTGTGTCTAAGGTTGTAAGCACAGATGAATATGTAACAAGAACA  
AATATATATTTATTATGCAGGTAGCACACGTTTGTGGCTGTGGGACACCCATATTTTCCT  
ATCAAGGATTCTCAAAAACGTAAAACCATAGTTCCTAAAGTTTCAGGTTTGCAATACAGG  
GTGTTTAGGCTTCGTTTACCAGATCCTAATAAATTTGGATTTCCAGATGCATCCTTTTAT  
AATCCTGATAAGGAGCGCCTAGTATGGGCCTGTTCTGGTGTGGAGGTTGGACGTGGACAA  
CCCTTAGGTATAGGTACTAGTGGCAATCCATTTATGAATAAATTAGATGATACTGAAAAT  
GCTCCTAAATACATTGCTGGACAAAATACAGATGGTAGAGAATGTATGTCAGTGGATTAT  
AAACAAACACAGTTTGTGTATTTTAGGTTGTAGGCCTCCCTTAGGGGAACATTGGGGTCCA  
GGCACGCCATGTACTTCACAAACTGTTAATACTGGTGATTGTCCCCACTGGAATTAAAG  
AACCCCCCTATACAGGATGGTGATATGATAGATGTTGGCTTTGGAGCCATGGATTTTAAA  
GCTTTACAAGCAAATAAAAAGTGATGTACCTATTGATATTTCTAACACTACCTGTAAATAC  
CCAGATTATTTAGGCATGGCTGCTGATCCCTATGGTGATTCCATGTGGTTTTATCTTCGT  
AGGGAACAAATGTTTGTTCGACACTTATTTAACAGGGCTGGTGATACCGGTGATAAAATC  
CCAGATGACCTAATGATTAAAGGCACAGGCAATACTGCAACACCATCCAGTTGTGTTTTT  
TATCCTACACCTAGTGGTTCCATGGTTTCTTCAGATGCACAGTTGTTTAAATAAACCTTAT  
TGGTTGCAAAAGGCACAGGGACAAAATAATGGTATTTGTTGGCATAATCAATTATTTTTTA  
ACTGTTGTAGATACTACTAGAAGCACTAATTTTTCTGTATGTGTAGGTACACAGGCTAGT  
AGCTCTACTACAACGTATGCCAACTCTAATTTTTAAGGAATATTTAAGACATGCAGAAGAG  
TTTGATTTACAGTTTGTTTTTTTCAGTTATGTAAAATTAGTTTAACTACTGAGGTAATGACA  
TATATACATTCTATGAATTCTACTATATTGGAAGAGTGAATTTTGGTCTTACCCACCA  
CCGTCAGGTACTTTAGAGGAAACATATAGATATGTAACATCACAGGCTATTAGTTGCCAA  
CGTCCTCAACCTCCTAAAGAAACAGAGGACCCATATGCCAAGCTATCCTTTTGGGATGTA  
GATCTTAAGGAAAAGTTTTCTGCAGAATTAGACCAGTTTCCTTTGGGAAGAAAATTTTTTA  
TTACAACCTGGTATGCGTGCACGTCTAAGTTACAAGCTTCTAAACGTTCTGCATCTGCT  
ACCACAAGTGCCACACCTAAGAAAAAACGTGCTAAACGATTTTAATAAGTGTAATGTGTA  
TGTGTTGTTTGTGTATGTTACATGTGTTTTGTATGTTTGTGTTGTATGTTAACTGTT  
TACTAATACTGTGTGTATGTTTATGTACATGTGTATAACTGTTTGTGTTTATATATATGTAT  
GTATTTGTGTGTATGTGTATGTGTATGTGTATGTGTAGTAATGTTTGTATGTATGTTTAA  
TAAAGTTTATATGTGTGTTGTGTGGGTGGTTTACTTGACTACTGTGCTTCCATTTTGTAT  
AGTCGCCATTTTACATGCATTAAGGTAAAAAGGGCAACCGATTTTCGGTGCACAGTAAAA  
CATGTTTTAATGTGTTTTGCTGTTGTAGCAAAATAGTTGTACTGTTTTTGGCTTCCTGCA  
GGCAACTTGGCAGGGTTTGTTCCTTAACATGTTTCATCCACGCAAGGTTATAAAGGTAA  
AAGGCGCCACCTGGCAGTTACTCATTTGTCTGCAATTATTTAAACAATGTCTTGCACACA  
CATTTTTTACCCACCCTATCATAAAATTGCTTTTAAAGCACATACCTATACTATGTACACA  
GTGTACTCTTGGCAGAACATTGTTTTTAAATGCCAAGTAATTGTTTTATAAATGAGTAA  
TAACGTGTTACTCATACCTAAGCTAAAAAGTTAAACCTATTTGGATCACACAAATGCCAA  
TTTATTTCTTATTTACAAATA

>gi|557236|emb|X77858.1|\_HumanPapillomaVirusType59,\_complete\_viral\_genome  
GTTAAGACCGAAAACGGTGCATATAAAGGTAGTTGAAAAGAAAAGGGCAACGGCATGGCA  
CGCTTTGAGGATCCTACACAACGACCATACAAACTGCCTGATTTGAGCACAAACATTGAAT  
ATTCTCTGCATGATATTCGCATCAATTGTGTGTTTTGCAAAGGGGAAGTCAAGAAAGA  
GAGGTATTTGAATTTGCTTTTAAATGACTTATTTATAGTGTATAGAGACTGTACACCGTAT  
GCAGCGTGTCTGAAATGCATTTTCATTTTATGCAAGAGTAAGAGAATTAAGATATTATAGA

GATTCCGTGTATGGAGAAACATTAGAGGCTGAAACCAAGACACCGTTACATGAGCTGCTG  
ATACGCTGTTATAGATGCCTAAAACCTCTATGTCCAACAGATAAATTAAAGCATATAACT  
GAAAAAAGAAGATTCCATAATATAGCTGGAATATATACAGGACAGTGTCTGTGGGTGTCGG  
ACCCGAGCAAGACACCTAAGACAGCAACGACAAGCGCGTAGTGAAACACTGGTGTAAAAC  
AATGCATGGACCAAAAGCAACACTTTGTGACATTGTTTTAGATTTGGAACCACAAAATTA  
TGAGGAAGTTGACCTTGTGTGCTACGAGCAATTACCTGACTCCGACTCCGAGAATGAAAA  
AGATGAACCAGATGGAGTTAATCATCCTTTGCTACTAGCTAGACGAGCTGAACCACAGCG  
TCACAACATTGTGTGTGTGTGTTGTAAGTGTAATAATCAACTTCAGCTAGTAGTAGAAAC  
CTCGCAAGACGGATTGCGAGCCTTACAGCAGCTGTTTATGGACACACTATCCTTTGTGTG  
TCCTTTGTGTGTCAGCAAACAGTAACCTGCAATGGCCGATTTCGGAAGGTACAGATGGGGA  
AGGGACGGGGTGCAATGGATGGTTTTTTGTGTCAGGCAATAGTAGATAAAAAAACAGGTGA  
CAAAATTTTCAGATGACGAGGATGAAAATGCAACAGATACAGGTTTCAGACTTGGTAGATTT  
TATTGATGATACCACAACAATTTGTGTACAGGCAGAGCGCGAGACAGCACAGGCCTTGTT  
TAATGTGCAGGAAGCCCAAAGGGATGCACGGGAAATGCATGTTTTAAACGAAAGTTTG  
GTGCAGTATAGAAAACAGTAGTGAGAAAGCGGCGGCAGGAAAAAAGCTAAGTCACCATT  
ACAAGAAATATCAGTAAATGTTAACCACCCAAAAGTAAAAAGAAGGTTAATAACAGTGCC  
AGACAGCGGCTATGGCTATTCTGAAGTGGAATGCTCGAGACTCAGGTAACCGTGGAGAA  
TACTGGAAATGGGGATAGCAATGGCAGTGTGTGTAGCGACAGTCAAATAGACTGTAGCGA  
CAGCAGTAACATGGATGTTGAAAACATAGTTCCAACATCCCCACTAATCAATTGTTACA  
GTTATTACATTAGCAAAAAAAGAAAGCAGCTATGTATGCAAAATTTAAAGAAATTGTATGG  
GTTATCATTTCAAGATTTGGTTAGGACATTTAAAAGTGACAGAAGTACCTGTAGCGATTG  
GGTAACCGCCATTTTTGGTGTTAATCCAACGTGTAGCAGAAGGATTTAAACATTAAATACA  
ACCCTATGTGCTATATGCACATATACAATGCTTAGATTGTGCATGGGGAGTAGTAATATT  
AGCATTATTAAGATATAAATGTGGAATAAAGTGAATAACAGTTGCAAAAAGGACTTAGCAC  
ATTACTACATGTACCAGATACGTGCATGTTAATTGAACCACCCAAATTGCGTAGTGGTGT  
TGCAGCACTATATTGGTACAGAACAGGAATGTCCAATATTAGTGAAGTTATAGGGGAAAC  
GCCCGAATGGATACAAAGACTAACAATTATACAACATGGAGTTGATGATAGCGTGTTTGA  
CCTGTGCAAAATGATACAATGGGCGTTTGATAATGACCTAACAGATGAAAGTGATATTGC  
ATATGAATATGCATTAATAGCAGATAGTAATAGTAACGCCGCTGCATTTTTTAAAAGCAA  
CTGCCAGGCAAAATACCTAAAAGATTGTGCAGTTATGTGTAGGCATTATAAAAGAGCACA  
AAAAAGACAAATGAGTATGTCACAGTGGATAAAATGGAGATGTGATAAAATAGAAGAGGG  
GGGAGATTGGAACCCATAGTACAATTTTTTAAGATATCAAGGAGTAGAATTTATAACGTT  
TTTATGTGCATTTAAAGATTTTTTTAAAGGTACCCCAAAAGAAATTGCATTGTGCTGTG  
TGGGCCAGCAAATACAGGCAAGTCATACTTTGGAATGAGCCTGCTACATTTTTTTACAAGG  
AACTGTAATTTACATGTAAATTCAAATAGTCACTTTTGGCTAGAACCCTTAACAGATCG  
TAAATTAGCTATGCTAGACGATGCAACAGATAGTTGTTGGACATATTTTGATACATATAT  
GCGAAATGCTTTGGATGGCAATCCTATAAGTGTTAGATAGAAAGCATAGGCACCTAGTACA  
AATTAAATGTCCACCAATGCTTATTACATCAAATACAAATCCAGTTACAGATAACAGGTG  
GCCATATTTAAATAGCAGATTAATGGTATTTAAATTTCCAAACAAATTGCCATTTGACAA  
AAATAGAAAATCCAGTATATACAATTAATGACAGAACTGGAAATGTTTTTTGAAAGGAC  
GTGGTGCAGATTAGATTTGAACGAGGAAGAGGAAGATGCAGACAGTGATGGACACCCTTT  
CGCAGCGTTTAAAGTGTGTACAGGATCAAAATATTAGAACATTATGAAAACGATAGTAAAG  
ACATTAATGAACACATAAACTATTGGAACTGGTGCGTATGGAAAATGTAATTTTATTTG  
CAGCAAGAGAGAACAAATATACATACATTAAACCACCAGGTGGTGCCAACGTTTTTGGTGT  
CTAAAAACAAGGCATGTGAAGCTATTGAACTGCAGTCAAACCGTACTTCCACTGTAATGC  
CCTGTTTTTTTAAACATTTTTTAGGTGCTGTTTGCCATAGTTCTTGCCATGTTTCTTGCA  
TTGTCCATTGCTCATTTTTTAAACTCAGTTTGTGCCAAACTCTCTAACGCCATCTGCAGCA  
AGGAAAACACAATGCATTACACAAGCTGGACATTTATATATTATGTAAATGATGTAGGAC  
AGTGGTGTAAAACCACAGGAAATGTGGACTTTTGGGGACTATATTATAAAGTGGAAGAGG  
AACAGGTGTACTATGTAAAATTTATACATGATGCCAAAAAATATGGGACTACAGACAAGT  
GGGAAGTGCAATTATAATGGCAAGGTTATTGATTGTATGACTCTATGTGCAGTACCAGTG  
ACGAGCAAGTATCCACTGCTGGATCTTCTGAGCAACTATCATACCCCCTCCGCAACGCCCC  
CCGAAGCCACGTACTTGGGCCCCCAACGTTGGAACCGTCAGACGAAGACTGGAAAGCGAC  
CAAGACAGTGTGGATACACACAGCACCCCTCAGTCTACCAGCGTGTGAGTGGACTACTGTG  
ACAACCCAGTCGTCCGTTTGCATCCAGGCAACAACCCGCGACGGCACATCCCTTGCAGTA

ACACTACGCCTATAATACACTTAAAAGGTGACAAAAATGGCCTTAAGTGTTTAAGGTATA  
GATTAAGAAAAGTACACTGGTTATTTGAAAATATTTCCCTCTACCTGGCATTGGACAGGAA  
ACAGAGGATCAGCCAAAACAGGCATTTTAACATTAACATATACAAGCGAAACACAACGCA  
ATGAATTTTGTAGATACTGTAAAAATTCCTAATAGTGTACAAATACATGTTGGGTATATGA  
GTGTGTAATGGTTGTTATGCAAATGTAACACAAGCCAATACTGCTGCTATATTGTATAGC  
TGAGGAAATGATAACCCCTGTATTTGTGTGTTGTGTTTGTGTTTGCTTGTGTGTGTGTTG  
CAATGTCCCGCTTCTGCAATCTGTCTATATGTGTGCATATACATGGTTACTAGTATTTGT  
GTATATTGTGGTTATCACCTCCTCATATGAGTGTTTTTTTACTATATATATTGTTTTTTAT  
AATTCCACTGTTACTACTATATGCCCATGCAATACTGTCCATACAATAATTGCTGTATAT  
TGTAATAATTACATTGCACCTGTATTGTACAGTATATTTTAAACACATTATTATTTTGTAG  
GTGTTGGTTTTGTTACATTTATAATAAAACATGGTTTCCCATCGTGCTGCTCGTCGTAAA  
CGTGCCTCAGCAACAGACTTATATAAAACTTGCAAGCAGGCAGGTACATGCCCTTCTGAT  
GTTATTAATAAAGTTGAAGGTACAACCTTTAGCTGATAAAATATTGCAGTGGACCAGCCTA  
GGAATATTTTGGTGGACTAGGTATTGGTACTGGATCTGGTACCGGTGGCAGAACAGGG  
TACATACCTTTAGGGGGGCGTACAAACACTATAGTAGATGTATCGCCTGCTAAACCACCA  
GTAGTTATTGAACCTGTTGGACCTACAGATCCATCTATAGTTACATTAGTTGAGGATTCT  
AGTGTTATAACATCTGGAGCCCCCTGCCCCAACATTTACAGGTACTTCAGGATTTGAAATA  
TCTACCTCTAGTACAACAACACCAGCTGTTTTGGATATAACCCCAACCTCTTCTGTTCAA  
ATTAGAGCTCTAGTTTTTATAAATCCTGCATTTACAGACCCTTCTGTCATTGAGGTTCCC  
CAAACAGGTGAAATTTCTGGTAAATATATAATTAGTACCCTACCTCTGGTGCACATGGC  
TATGAAGAAATTCCAATGCAAACGTTTTGTACGGAAGGTACTGGTTTGAACCCATTAGC  
AGTACCCCCAATCCAACAGTACGTCGTGGCTGGACCTAGATTGTACAGTAGGGCTAAT  
CAACAAGTTCGGGTGTCTAACGCTGACTTTTTTAACACGTCCATCCACATTTGTTACATAT  
GATAACCCCTGCTTATGATCCAATTGATACTACATTAACTTTTGACCCCTCATCAGAGGTT  
CCAGACCCGGACTTTATGGATATAGTTTCGTTTGCATAGGCCTGCATTAACATCCAGACGC  
AGCACTGTAAGGTTTAGTAGGCTAGGACAACGGGCAACCATGTTTACCCGTAGTGGTAAA  
CAAATTGGGGCCCCGTGTACATTTTTTATCATGATATAAGCCCTATACCACATGCTGAAGAT  
ATTGAATTGCAACCTCTTGTCTTCCCAGGCTGCTACTGATGATATATATGATATATAT  
GCAGATATTACAGATGAAGCACCTACTAGTACTGCCAACACTGCATTTACAATTCCTAAA  
TCTTCTTTTCAAAGTTTGTCAATTAACACGGTCGGCATCTAGCACCTTTTCAAATGTAAC  
GTTCCCTTTGGCTACTGCCTGGGATGTTTCTGTAAATACAGGACCCGATATAGTTTTACCT  
AATACTAATATTGTTGAACCCACTTATTCTACTACACCCTTTACCACCATACAGTCTATT  
AATATAGAAGGCACAAATTATTTTTTATGGCCTATATATTATTTTTTACCTCGTAAACGT  
AAACGTGTTCCCTATTTTTTTTACAGATGGCTCTATGGCGTTCTAGTGACAACAAGGTGTA  
TCTACCTCCACCTTCGGTAGCTAAGGTTGTCAGCACTGATGAGTATGTCACCCGTACCAG  
TATTTTCTACCACGCAGGCAGTTCCAGACTTCTTACAGTTGGACATCCATATTTTAAAGT  
ACCTAAAGGTGGTAATGGTAGACAGGATGTTCCCTAAGGTGTCTGCATATCAATACAGAGT  
ATTTAGGGTTAAGTTACCTGATCCCAATAAAATTTGGCCTTCCAGATAACACAGTATATGA  
TCCTAACTCTCAACGCTTGGTCTGGGCCTGTGTAGGTGTTGAAATCGGTGCGGGGCAACC  
TTTAGGGGTAGGACTCAGTGGTCATCCATTATATAATAAATTGGATGACACTGAAAACCTC  
TCATGTAGCATCTGCTGTTGATACCAAAGATACACGTGATAATGTATCTGTGGATTATAA  
ACAACTCAGCTGTGTATTATTGGCTGTGTACCTGCCATTGGAGAACACTGGACAAAGGG  
CACTGCTTGTAAAGCCTACTACTGTGGTTCAGGGCGATTGTCCTCCACTAGAATTAATAAA  
TACACCAATTGAAGATGGTGATATGGTAGACACAGGATATGGGGCTATGGACTTTAAATT  
GTTGCAGGATAACAAAAGTGAAGTACCATTTGGATATTTGTCACTCTATTGTAAATATCC  
TGATTATTTACAAATGTCAGCAGATGCTTATGGAGACAGTATGTTTTTTGTTTAAGGCG  
AGAACAGGTTTTTGGCAGACATTTTTGGAATAGATCTGGTACTATGGGTGATCAACTTCC  
TGAATCACTATATATTAAAGTACTGACATACGTGCCAACCAGGCAGTTATTTATATTCT  
CCCTTCCCCAAGTGGGTCTGTGGTTACTTCTGATTACAAATTATTTAATAAACCATATTG  
GCTGCACAAGGCTCAGGTTTTAAACAATGGTATATGTTGGCACAATCAATTGTTTTTAAC  
AGTTGTAGATACCTACGCGAGCACCAATCTTTCTGTGTGTGCTTCTACTACTTCTTCTAT  
TCCTAATGTATACACACCTACCAGTTTTTAAAGAATATGCCAGACATGTGGAGGAATTTGA  
TTTGCAGTTTATATTTCAACTGTGTAAAAATAACATTAACCTACAGAGGTAATGTCATACAT  
TCATAATATGAATACCCTATTTTTGGAGGATTGGAATTTTGGTGTTACACCACCTCCTAC  
TGCTAGTTTAGTTGACACATACCGTTTTGTTCATCTGCTGCTGTAACCTTGTCAAAAGGA

CACCGCACCGCCAGTTAAACAGGACCCTTATGACAAACTAAAGTTTTGGCCTGTAGATCT  
TAAGGAAAGGTTTTCTGCAGATCTTGATCAGTTTCCTTTGGGACGTAAATTTTTATTGCA  
ATTAGGAGCTAGACCTAAGCCCACTATAGGCCACGCAAACGTGCAGCGCCTGCCCCCTAC  
CTCTACCCCATCACAAAACGTGTTAAGCGTCGCAAGTCTTCCAGAAAATAGTGTGTTT  
GTTATGTGTTTGTATGTGTGCATGTTGTATGTTTTGTATTGTTTGCCTGTTTGTATGTTG  
TGTATATGTACATGTTTGTGTGTCTGCTGTATGTGTGTATTTGTTTTTGTACATAATAAA  
GTATGCATGACAGTTTCATGTGTGGTTGCACCCAATGAGTAAGGTACTGTCCCTTTATTG  
TTTCTTTGTCCCTTATTACACATTATTACACATTGCCCCTACTTACATAGGTGTGTTTGTTC  
CTTCATTTTGTCCCTGAATGTCCAGTTTTTGCATTTGCACATTATATGGCGTCCATTTTATC  
CTTTAAATCCTCCATTTTGTCTGTGCAACCGTTTTCGGTTACCTTGGTTTAACTTACCTT  
TTTGAACAATTAATCTGTTTAAACATCAGCAAAACAGTTAATCCCCATCTTGTTTCCTCC  
TACACGCCTAGACTACTAACACAACCTTACAAACGCCAAATAGTTAGTCATCATCCTGTCC  
AGGTGCACTCTAACAACTTGCATAACTTTGGTGGCGCCCTTGTTAATAAAACAGCTTT  
TAGGCACATATTTTCACTGTTTTTACTACTTTAATTGCATAATTGGCTTGCAAACTACT  
GTGCAATCCAAGAATGTGTCTATAATTTATTGTAAAAAACATGACTAAGGTTTTTGTTCAT  
TGTTAAGCAACCGAAAAAGGTCGGGCAAGTACATGCACACTTCTACTTATTACTTTTTTA  
CAATCATAGTAATAAAAAAAGGGTGTAAACCGAAAAACG

>gi|397053|emb|X74483.1|\_Human\_papillomavirus\_type\_56\_genomic\_DNA

GAAAGTTTCAATCATACTTTTATATATTGGGAGTGACCGAAAAGGGTTTAAAGCCGAAAA  
CGGACATATAAAAGGCAGCTTATTCTGTGTGGACATATCCATGGAGCCACAATTCAACA  
ATCCACAGGAACGTCCACGAAGCCTGCACCCTTGAGTGAGGTATTAGAAATACCTTTTAA  
TTGATCTTAGATTATCATGTGTATATTGCAAAAAAGAACTAACACGTGCTGAGGTATATA  
ATTTTGCATGCACCTGAATTTAAATTAGTGTATAGGGATGATTTTCCCTTATGCAGTGTGCA  
GAGTATGTTTATTGTTTTATAGTAAAGTTAGAAAATATAGGTATTATGACTATTCAGTGT  
ATGGAGCTACACTAGAAAGTATAACTAAAAAACAGTTATGTGATTTATTAATAAGGTGCT  
ACAGATGTCAAAGTCCGTTAACTCCGGAGGAAAAGCAATTGCATTGTGACAGAAAAAGAC  
GATTTTCATCTAATAGCACATGGTTGGACCGGGTCATGTTTGGGGTGCTGGAGACAAACAT  
CTAGAGAACCTAGAGAATCTACAGTATAATCATGCATGGTAAAGTACCAACGCTGCAAGA  
CGTTGTATTAGAACTAACACCTCAAACAGAAATTGACCTACAGTGCAATGAGCAATTGGA  
CAGCTCAGAGGATGAGGATGAGGATGAAGTAGACCATTTGCAGGAGCGGCCACAGCAAGC  
TAGACAAGCTAAACAACATACGTGTTACCTAATACACGTACCTTGTTGTGAGTGTAAAGTT  
TGTGGTGCAGTTGGACATTCAGAGTACCAAAGAGGACCTGCGTGTTGTACAACAGCTGCT  
TATGGGTGCGTTAACAGTAACGTGCCCCTCTGCGCATCAAGTAACTAACTGCAATGGCG  
TCACCTGAAGGTACAGATGGGGAGGGGAAGGGATGTTGTGGATGGTTTGAAGTAGAGGCA  
ATTGTAGAAAAAAAACAGGAGATAAAATATCAGATGATGAAAGTGACGAGGAGGATGAA  
ATAGATACAGATTTAGATGGATTTATAGACGATTCATATATACAAAATATACAGGCAGAC  
GCAGAAACAGTCAACAATTGTTGCAAGTACAAACAGCACATGCAGATAAACAGACGTTGC  
AAAAACTAAAAAGAAAGTATATAGCTAGTCCATTAAGGGATATTAGTAATCAGCAAACCTG  
TGTGCCGGGAAGGAGTAAACCGGAGGCTTATTTTATCAGACCTACAAGACAGCGGGTATG  
GCAATACATTGGAACCTCTGGAAACACCAGAACAGGTAGATGAAGAGGTACAGGGACGTG  
GGTGCGGGGAATACACAAAATGGAGGCTCACAAAACAGTACCTATAGTAACAATAGTGAGG  
ACTCTGTAATACATATGGATATTGATAGAAACAATGAAACGCCAACACAACAATTGCAGG  
ACTTGTTTAAAAGTAGCAATTTACAAGGTAAATTATATTATAAATTTAAAGAAAGTGTATG  
GTATTCCATTTTCAAGATTGGTGCGTACGTTTAAAAGTGATAGTACATGTTGCAATGATT  
GGATATGTGCTATATTTGGTGTTAATGAAACATTAGCCGAGGCACTAAAACTATAATAA  
AACCACACTGTATGTATTATCATATGCAATGTTTAAACATGTACATGGGGGGTTATAGTAA  
TGATGCTAATTAGATATACATGTGGCAAAAACAGAAAAACAATTGCAAAAGCATTAAGCT  
CAATATTAAATGTACCACAGGAGCAAATGTTAATTCAACCACCAAAAAATACGAAGTCCTG  
CTGTAGCTTTTATATTTTATAAAAACAGCAATGTCAAATATTAGTGATGTGTATGGAGACA  
CACCAGAATTGGATACAAAGACAACACAATTGCAACACAGTTTACAGGATAGTCAATTTG  
AATTATCTAAAAATGGTGCAGTGGGCATTTGATAATGAAGTAACAGATGATAGCCAAATTG  
CGTTTTCAATATGCACAATTAGCAGATGTAGACAGCAATGCACAAGCCTTTTTTAAAAAGCA  
ATATGCAGGCAAAATATGTAAAGGATTGTGGAATAATGTGTAGACATTATAAAAGGGCAC  
AACAGCAACAAATGAATATGTGCCAGTGGATAAAGCACATATGTAGTAAAAACAGATGAAG  
GGGGTGATTGGAAACCCATTGTACAATTTTAAAGATATCAAGGGGTCGATTTTCATTTTCAT

TTCTAAGTTACTTTTAAATTATTTCTACAAGGAACACCTAAACATAACTGTTTGGTACTTT  
GTGGACCGCCAAATACAGGTAAATCATGCTTTGCTATGAGTCTTATAAAGTTTTTTCAAG  
GGTCTGTCAATTCATTTGTGAATTCACAAAGCCACTTTTGGTTGCAGCCATTAGACAATG  
CTAAACTTGGGTTGTTGGATGATGCAACAGAAATATGTTGGAAATATATAGACGATTATT  
TAAGGAATTTGGTAGATGGAAATCCTATAAGTTTAGATAGAAAACATAAACAATTAGTAC  
AAATAAAATGTCCACCATTACTAATTACAACCAATATAAATCCTATGCTAGATGCTAAAT  
TACGATATTTACACAGTAGAATGTTAGTGTTCAGTTTCAAATCCATTTCCATTAGATA  
ATAATGGTAATCCTGTATATGAATTAAGTAATGTAAACTGGAAATGTTTCTTTACAAGGA  
CGTGGTCCAGATTAAATTTGGATAACGACGAGGACAAAGAAAACAATGGAGACGCTTTCC  
CAACGTTTAAATGCGTGCCAGAACAAAATACTAGACTGTTTTGAAAAAGATAGTAGATG  
TATTGCAGATCATATAGAATATTGGAAAAGCTGTGCGACATGAAAATGTGCTATACTATAA  
AGCAAGAGAAAATGACATTACTGTACTAAACCACCAGATGGTGCCTTGTTTACAAGTATG  
TAAAGCAAAAGCATGTAGTGCAATAGAAGTGCAAATAGCACTGGAATCATTAAGTACAAC  
AATATATAACAATGAAGAGTGGACATTAAGAGACACATGCGAGGAACTATGGCTTACTGA  
ACCTAAAAAATGCTTTAAAAAAGAAGGACAACATATAGAAGTATGGTTTGATGGTAGTAA  
AAACAATTGTATGCAATATGTAGCCTGGAAATATATATATTACAATGGAGATTGTGGGTG  
GCAAAAAGTGTGTTCTGGGGTAGACTATAGAGGTATATATTATGTACATGATGGCCACAA  
AACATACTACACAGACTTTGAACAAGAGGCCAAAAAATTTGGGTGTAAAAACATATGGGA  
AGTACATATGGAAAATGAGAGTATTTATGTCCTGACTCTGTGTCTAGTACCTGTAGATA  
CAACGTATCCCCTGTTGAAACTGTTAACGAATACAACACCCACAAGACCACCACCACCAC  
CTCCACGTCCGTGGGCAACCAAGACGCCGAGTATCCACAGACCAGGAAAACGACCCAG  
ACTACGGGAATCAGAATTTGACTCCTCCAGAGAGTCCACGCAAAGTGTCACAACACA  
CACACACATCAGCGACACAGACAATACCGACAGTAGAAGTAGAAGTATCAACAACAACAA  
CCACCCTGGTGATAAGACTACGCCTGTAGTACATTTAAAAGGTGAACCTAACAGATTAAA  
ATGTTGTAGATATCGATTTCAAAAATATAAAACATTGTTTGTGGATGTAACATCAACATA  
TCATTGGACAAGTACAGACAATAAAAAATTATAGCATAATTACAATTATATATAAGGATGA  
AACACAACGAAACAGCTTTTTAAGTCATGTAAAAATTCAGTAGTGTACAGGTTAGTTTG  
GGACAAATGAGTTTTCCATAAAGTGCTGTATATATTGTATATACATTTGTGTTATTGTAA  
CACACAAATACGTGAAGTGTACCTGCCATACATTGCTGCTACGCATATATATTGCAACCA  
TTGATTTTTGTGTTATTGGTGTGTTTGCGCTTTGCTTTTGTGTTTGTGTTGCTGTGTGTC  
ATGTTGTCCCGCTTTTGCTATCTGCCTCTGTGTTTTCCAGTTGTATATTATTAATAATAT  
TGTTTTGGTTTGTATAGCCACATCCTTTTTTAATACATTTATAATATTTTGTATTTTT  
TTTACTGTCTGTGCTGTGTATATATTACATGCTTTGTGGATAATAAATAATATGTAAA  
TGTAGTAGTACTGTTACTACTATGGTTGCCACCGTGCCACACGACGCAAACGCGCATCT  
GCAACACAACATATATAAAACATGTAAGTTGTCTGGTACATGTCCAGAGGATGTTGTTAAT  
AAAATAGAGCAAAAACATGGGCTGATAAAATATTGCAATGGGGAAGTTTATTTACATAT  
TTTGGAGGCCCTTGGCATTGGTACAGGAACCTGGGTCTGGGGGTGCGTCAGGCTATGTTCCA  
TTGGGGTCTAGGCCTTCCACAATAGTTGATGTAACCTCCGGCGCGACCACCTATTGTTGTG  
GAATCCGTAGGGCTTACAGACCCTTCCATTGTTACATTAGTTGAGGAGTCCAGTGTTATA  
GAATCTGGTGCAGGGATTCTTAATTTTACTGGGTCTGGGGGATTTGAAATTACATCCTCA  
TCAACAACATACACCTGCCGTGTTGGATATTACACCAACCTCTAGTACTGTACATGTCAGT  
AGTACCCATATAACCAATCCGTTATTTATTTGATCCCCCTGTTATTGAGGCCCCACAAACA  
GGCGAGGTGTCTGGCAATATTTTAATTAGCACACCCACATCTGGTATACATAGCTATGAA  
GAAATACCTATGCAAACATTTGCTGTTTACGGTTCTGGTACAGAACCTATTAGTAGTACT  
CCTATTCCAGGCTTTAGGCGTATTGCAGCTCCTAGATTATATAGAAAAGCATTTTCAGCAG  
GTTAAGGTAACTGACCCTGCATTTCTTGATAGACCTGCAACATTAGTATCTGCTGATAAT  
CCACTTTTTGAAGGTACTGACACATCTTTAGCTTTTTCTCCGTCGGGTGTGGCTCCTGAC  
CCTGATTTTATGAATATAGTAGCATTACATAGGCCTGCATTTACTACACGTAGGGGTGGT  
GTACGTTTTAGTAGGCTTGGCAGAAAGGCTACTATACAACACGTAGAGGCACACAAATA  
GGTGGCCGTGTGCAATTATTATTATGATATAAGTCCATTATGCACAGGCTGAGGAAATTGAA  
ATGCAGCCATTATTGTCTGCAAATAATTCTATTGATGGCCTATATGATATTTATGCAAAT  
ATAGATGATGAAGCACCTGGTTTGTCTAGCCAGTCAGTTGCTACACCTTCTGCACACTTA  
CCTATAAAAGCCTTCCACATTGTCTTTTGCTAGTAACACCCTAATGTAACCTGCCCCTTTA  
GGTAATGTGTGGGAAACACCATTTTATTCAGGTCCTGACATAGTGTGCTTACAGGCCCC  
AGTACGTGGCCCTTTGTTCTCAGTCTCCTTATGATGTTACCCATGATGTATATATACAG

GGATCCTCCTTTGCATTATGGCCTGTGTATTTTTTTTAGACGTAGGCGCCGTAAACGTATT  
CCCTATTTTTTTTGCAGATGGCGACGTGGCGGCCTAGTGAAAATAAGGTGTATCTACCTCC  
AACACCTGTTTCAAAGTTGTGGCAACGGATTCCCTATGTAAAACGCACTAGTATATTTTA  
TCATGCAGGCAGTTCACGATTGCTTGCCGTAGGACATCCCTATTACTCTGTGACTAAGGA  
CAATACCAAAAACAAACATTCCCAAAGTTAGTGCATATCAATATAGGGTATTTAGGGTACG  
GTTGCCCCGACCCTAATAAGTTTGGGCTTCCAGATACTAATATTTATAATCCGGACCAGGA  
ACGGTTAGTGTGGGCATGTGTAGGTTTGGAGGTAGGCCGCGGACAGCCTTTAGGTGCTGG  
GCTAAGTGGCCATCCATTGTTTAATAGGCTGGATGATACTGAAAGTTCCAATTTAGCAAA  
TAATAATGTTATAGAAGATAGTAGGGACAATATATCAGTTGATGGCAAGCAAACACAGTT  
GTGTATTGTTGGATGTACTCCCGCTATGGGTGAACATTGGACTAAAGGTGCTGTGTGTAA  
GTCCACACAAGTTACCACAGGGGACTGCCCCCTCTTGCATTAATTAATACACCTATAGA  
GGATGGGGACATGATAGACACAGGATTTGGCGCTATGGACTTTAAGGTGTTGCAGGAATC  
TAAGGCTGAGGTACCTTTAGACATTGTACAATCCACCTGTAAATATCCTGACTATTTAAA  
AATGTCTGCAGATGCCTATGGTGATTCTATGTGGTTTTACTTACGCAGGGAAACAATTATT  
TGCCAGACATTATTTTAATAGGGCTGGTAAAGTTGGGGAAACAATACCTGCAGAGTTATA  
TTTAAAGGGTAGCAATGGTAGAGAACCCCTCCGAGTTCTGTATATGTTGCTACGCCTAG  
TGGGTCTATGATTACGTCTGAGGCACAGTTATTTAATAAACCTTATTGGTTGCAACGTGC  
CCAAGGCCATAATAATGGCATTGTGCTGGGGTAATCAATTATTTGTTACTGTAGTAGATAC  
TACGAAAAGTACTAACATGACTATTAGTACTGCTACAGAACAGTTAAGTAAATATGATGC  
ACGAAAAAATTAATCAGTACCTTAGACATGTGGAGGAATATGAATTACAATTTGTTTTTCA  
ATTATGCAAAAATTACTTTGTCTGCAGAGTTTATGGCATATTTACATAATATGAATGCTAA  
CCTACTGGAGGACTGGAATATTGGGTTATCCCGCCAGTGGCCACCAGCCTAGAAGATAA  
ATATAGATATGTTAGAAGCACAGCTATAACATGTCAACGGGAACAGCCACCAACAGAAAA  
ACAGGACCCATTAGCTAAATATAAATTTTGGGATGTTAACTTACAGGACAGTTTTTCTAC  
AGACCTGGATCAATTTCCACTGGGTAGAAAAATTTTTAATGCAACTGGGCACTAGGTCAA  
GCCTGCTGTAGCTACCTCTAAAAAGCGATCTGCTCCTACCTCCACCTCTACACCAGCAA  
ACGTAAAAGGCGGTAGTGTGTTGTTGTGTGTTTGTGTAAGTGTGTTTGTGTGTTGTATAT  
ATGGTATGTTTGTGTATGTGCTTTATTTTATACTTTGTATGTGTATGTTGTGTTTGTGTA  
AATGTTTGTGTGAAATGTTTGTGTGTGTATTCAATTGTATGTATGACTGTATATATGTGTA  
ATGTTTGTGTGCTGTGAATAAACATGAATGAGTGCTTTTACGCGTGGTTGCATAAACTAA  
GGTGTGTCATTATTGTGGCTTTTGTGTTTGTAAAGTTATTGTGTACAGTGTACTATGTGTAT  
TGTGCATACATATATATACCATAACATACTCCATTTTGTGTTTTTCCGCCATTTTGTAC  
ATGCAACCGAATTCGGTTGCATGGCCTAGTGCCATTATTTAAACTAAAAGGAATTCGGTT  
GCATGGCCTAGTGCCATTATTTAAACCAAAAGGCCCTTTTCAGCAGAACAGTTAATCCTT  
TGGCATATTGCCGTTTCTGTGTTTTATACTTGAATTATGTACAGTACCGCACCTGTAT  
TACTCACAGGTACTATGACTGCCAATATGCTTTTATCTGCATACTTTAGTGCTGTTGGG  
CACACATTTTTATACATGTGTCTGCAACTTTGGTGTTTTGGCTTGCAGAATACACTATGT  
AGGCCAAGTATCTGTCAAGTATCTGTTTTGCAAACATGTAACATACAATTACTCATTTTTT  
AAAACCGTTTACGGTCGTGCAAAAACAGGTTTCTTTTAATTGTT

>gi|397038|emb|X74481.1|\_Human\_papillomavirus\_type\_52\_genomic\_DNA

TAAATTATAATCTTATACTAGTAAAAAATAGGGTGTAAACCGAAAACGGTCAGACCGAAAC  
CGGTGTATATATATAGAACACAGTGTAGCTAACGCACGGCCATGTTTGAGGATCCAGCAA  
CACGACCCCGGACCTGCACGAATTGTGTGAGGTGCTGGAAGAATCGGTGCATGAAATAA  
GGCTGCAGTGTGTGCAGTGCAAAAAAGAGCTACAACGAAGAGAGGTATACAAGTTTCTAT  
TTACAGATTTACGAATAGTATATAGAGACAATAATCCATATGGCGTGTGTATTATGTGCC  
TACGCTTTTTATCTAAGATAAGTGAATATAGGCATTATCAATATTCAGTGTATGGGAAAA  
CATTAGAAGAGAGGGTAAAAAAACCATTAAGTGAATAAATATTAGATGTATAATTTGTC  
AAACGCCATTATGTCTTGGAAGAAAAAGAAAGACATGTTAATGCAACAAGCGATTTCATA  
ATATTATGGGTCGTTTGGACAGGGCGCTGTTTCAGAGTGTTGGAGACCCCGACCTGTGACCC  
AAGTGTAAACGTATGCGTGGAGACAAAGCACTATAAAAGATTATATATTAGATCTGCAA  
CCTGAAACAACCTGACCTACACTGCTATGACCAATTAGGTGACAGCTCAGATGAGGAGGAT  
ACAGATGGTGTGGACCGGCCAGATGGACAAGCAGAACAAGCCACAAGCAATTACTACATT  
GTGACATATTGTACAGTTGTGATAGCACACTACGGCTATGCATTCATAGCACTGCGACG  
GACCTTCGTACTCTACAGCAAATGCTGTTGGGCACATTACAAGTTGTGTGCCCCGGCTGT  
GCACGGCTATAAACAACCCTGCAATGGAGGACCTGAAGGTACAGAGGGCGAAAGGGAGG

GATGTACAGGCTGGTTTGAAGTAGAGGCAATAATAGAAAAACAAACAGGAGATAACATTT  
CAGAGGACGAGGATGAAAATGCATATGATAGTGGAACAGATCTAATAGATTTTATAGATG  
ATTCAAATATAAATAATGAACAGGCAGAACATGAGGCAGCCCGGCATTGTTTAATGCAC  
AGGAAGGGGAGGATGATTTACATGCTGTGTCTGCAGTAAAACGAAAGTTTACAAGCAGTC  
CGGAAAGTGCTGGGCAAGATGGTGTAGAAAAACATGGTAGTCCGCGTGCAAAACACATTT  
GTGTAAATACAGAGTGTGTTTTACCAAACGCAAACCATGTACGTAGAAGACAGCGGCT  
ATGGCAATAGTGAAAGTGAAGCGCAGCAGATGGCAGACCAGGTAGACGGGCAAAATGGCG  
ACTGGCAAAAGTAACAGTAGTCAATCAAGTGGGGTGGGGGCTAGTAATTCAGATGTAAGTT  
GTACTAGTATAGAGGACAATGAGGAAAAATAGTAATAGAACGCTAAAAAGCATACAAAATA  
TTATGTGCGAAAAATAGCATAAAAACAACCTGTATTATTTAAATTTAAAGAAACATATGGTG  
TTAGCTTTTATGGAATTAGTAAGACCATTTAAAAGTAATAGAAGTAGTTGTACAGATTGGT  
GTATTATAGGAATGGGAGTAACACCATCAGTTGCAGAAGGATTAAGTATTAATACAGC  
CCTATAGCATATATGCCCATTTGCAATGTTAACATGTGACAGAGGCGTGCTTATACTGC  
TGCTAATTAGGTTTAAATGTGGAAAAACAGATTAACAGTGTCCAACTAATGTCACAGC  
TGTTAAATATACCAGAAACACATATGGTAATAGAACCACCAAATACGAAGTGCTACCT  
GTGCATTATATTGGTATAGAACAGGTTTGTCTAATATTAGTGAGGTATATGGTACCACCC  
CAGAATGGATAGAACAAACAAACAGTATTACAGCATAGCTTTGACAATAGCATATTCGATT  
TTGGAGAAATGGTGCATGGGCATATGATCATGATATAACAGATGATAGTGACATAGCAT  
ATAATATGCACAGTTAGCAGATGTAAATAGCAATGCTGCAGCATTCTTAAAAAGCAATT  
CGCAAGCAAAAAATAGTAAGGACTGTGCAACCATGTGTAGACATTATAAACGGGCAGAAA  
GAAACATATGAATATTGGACAATGGATACAGTATAGATGTGATAGAAATAGATGATGGTG  
GAGATTGGAGGCCTATAGTAAGATTTTTAAGATATCAAGACATAGAATTTACAGCCTTTT  
TAGACGCATTTAAAAAATTTTTAAAGGTATACCTAAAAAATTTGTTTAGTATTATATG  
GACCTGCAAAACACAGGAAATCATATTTTGGAAATGAGTTTAATTAGGTTCTTAAGTGGAT  
GTGTAATATCCTATGTAAACTCAAAAAGCCATTTTTGGCTACAACCATTAAACAGATGCAA  
AAGTGGGTATGATAGATGATGTAACACCTATATGTTGGACATATATAGATGATTATATGA  
GAAATGCACTGGATGGAAATGATATATCAGTAGATGTAAAGCATAGAGCCTTAGTACAAA  
TAAATGCCACCATTAAATTTTAAACAACAAATACAAATGCAGGAACAGATCCTAGGTGGC  
CATATTTACATAGTAGATTGGTTGTGTTTCATTTCAAAAACCCATTTCCATTTGATGAAA  
ATGGCAATCCTATATATGAAATTAACAACGAAAATTGGAAATCCTTTTTCTCAAGGACGT  
GGTGCAAAATTAGATTTAATACAGGAAGAGGACAAGGAAAACGATGGAGTCGATACCGGCA  
CGTTTTAAATGCAGTGCAGGAAAAAATACTAGATCTATACGAAGCTGATAGTAATGACCTA  
AACGCACAAATTGAACATTGGAAATTGACTCGAATGGAATGTGTTTTGTTTTACAAAGCA  
AAGGAAGTGGGAATAACTCATATAGGCCACCAGGTGGTGCCACCAATGGCAGTGTCTAAG  
GCAAAGGCCTGCCAAGCTATTGAACTACAATTGGCATTGGAGGCATTAAACAAAACACAA  
TATAGCACAGATGGATGGACATTACAACAAACAAGTCTAGAAATGTGGCGTGACAGAACCA  
CAAAAATACTTTAAAAAACATGGGTATACAATAACAGTGCAATACGATAATGATAAAAAAC  
AATACTATGGATTATACAAACTGGAAGGAAATTTATTTACTTGGTGAGTGTGAATGTACA  
ATTGTAGAAGGACAAGTAGATTACTATGGGTTATATTATTGGTGTGATGGAGAAAAAATA  
TATTTTGTAAAAATTTAGTAACGATGCAAAGCAATATTGTGTAACAGGAGTATGGGAAGTA  
CATGTGGGTGGTCAGGTAATTGTTTGTCTGCATCTGTATCTAGTAACGAAGTATCCACT  
ACTGAAACTGCTGTCCACCTATGCACCGAAACCTCCAAGACCTCCGCAGTGTCCGTGGGT  
GCCAAAGACACACACCTACAACCACCACAGAAACGACGACGACCAGACGTCACAGACTCC  
AGAAACACCAAGTACCCCAACAACCTTTTGCGGGGACAACAATCCGTGGACAGTACTACA  
CGGGGACTCGTCACTGCAACTGAGTGCACAAACAAAGGACGGGTTCACATACAACCTTGT  
ACTGCACCTATAATACACCTAAAAGGTGATCCTAATAGTTTAAATGTTTAAAGATATAGG  
GTAAAAACACATAAAAGTTTGTATGTTCAAATTTTCATCTACCTGGCATTGGACCAGTAAT  
GAATGTACAAATAATAAACTAGGTATTGTAACAATAACGTACAGTGATGAAACACAACGT  
CAACAATTTTTTAAAAACTGTTTAAATAACAAATACGTGTGCAAGTTATACAAGGTGTCATG  
TCATTGTGATATTTGTACATATGTATATATGTATATGTGTATGGTAAACACCAACACAA  
GCCAATATTGCTGCTATTGTGTATATATAACAATGTTAGGATTATTTGTATTTTGTTTTA  
TTTTTGCTTATGGTGTTTTTGTGCAGTGCTTAGGCCGCTCTTGCTATCTATATCGGTGTATG  
CGCAGGTGTTGGTGTGGTGCTTTTTGCTATGGGTATCTATTGGGTCAACATTTAAAGTGT  
TTTTTTTGTACCTACTGTTTTTATATTTTCCAATGTTTTGTATTCACTGTCATGCACAGT  
ATTTGGCACAACCTGCAATAACTGTACATGTAGATTGGCTACATGCATATATGCAAAATAT

ACTTTTTCACTTTTGTAGTTTGTCTAATAAAATACTTTTATATTTTTTAATAGCTTGTCGC  
AATGAGATACAGACGGTCTACACGGCACAAACGTGCTTCTGCAACACAGCTATATCAAAC  
ATGCAAAGCCTCTGGCACCTGCCCCCGATGTTATTCCCTAAAGTGGAAGGCACAACCTAT  
TGCAGATCAACTTTTTAAAATATGGCAGCCTAGGGGTGTTTTTTGGAGGTTTGGGTATAGG  
TACAGGTGCAGGCTCTGGTGGTAGGGCAGGCTATGTGCCATTGTCCACTCGTCCTCCCAC  
TAGTAGTATTACCACGTCCACCATTTCGTCCCCCTGTAAGTGTAGAACCCATTGGTCCCTT  
AGAACCATCTATAGTTTCTATGATAGAAGAAACAACATTTATTGAGTCTGGCGCACCTGC  
TCCATCTATTCCATCAGCAACAGGGTTTTGATGTTACAACATCTGCAAATAAATACTCCTGC  
AATAATTAATGTAACATCTATAGGTGAATCATCTGTACAATCAGTTTCTACACATTTAAA  
TCCTACATTCACTGAACCATCTATAATACAGCCCCGGCACCTGCAGAAGCATCTGGTCA  
TGTATTGTTTTCTAGTCCAACCTATTAGTACACACACCTATGAAGAAATCCCTATGGATAC  
ATTTGTTACCTCTACTGACAGCAGCAGTGTAACAAGTAGTACACCTATTCCAGGGTCTCG  
CCCTACGACACGCCTTGGTTTATATAGCCGTGCCACACAACAGGTTAAGGTAGTCGACCC  
TGCTTTTATGTCATCACCACAGAAATTAGTAACATATAACAATCCTGTTTTTGAGGGCGT  
TGATACAGATGAACTATAATTTTTGATCGTTCACAACTTTTACCTGCACCGGATCCTGA  
TTTTTTAGACATTATAGCTTTGCATAGGCCTGCATTAACCTCTCGAAGAGGTACTGTTAG  
GTTTAGCAGGCTTGGTAATAAGGCCACCCTACGTACACGTAGTGGAAAACAAATTGGGGC  
ACGGGTACATTATTATCATGATATTAGTCCATCCAGCCTGCTGAAGTTCAGGAAGACAT  
AGAATTGCAACCTTTATTACCACAGTCTGTGTCCCTTACACTATTAATGATGGTTTGTA  
TGATGTGTATGCAGATTCTTTGCAGCAACCCACGTTTCACTTACCTTCCACACTTTCTAC  
CCATAATAATACTTTCACTGTACCTATTAATAGTGGTATTGACTTTGTATATCAACCCAC  
TATGTCCATTGAGTCAGGTCCTGACATTCCATTACCTTCGTTACCCACACATACTCCTTT  
TGTTCCCTATAGCCCCCTACAGCTCCATCTACATCTATTATTGTTGATGGTACAGATTTTAT  
TTTACATCCTAGTTATTTTTTTACTACGTCGCAGGCGTAAACGTTTTCCATATTTTTTTTAC  
AGATGTCCGTGTGGCGGCCTAGTGAGGCCACTGTGTACCTGCCTCCTGTACCTGTCTCTA  
AGGTTGTAAGCACTGATGAGTATGTGTCTCGCACAAAGCATCTATTATTATGCAGGCAGTT  
CTCGATTACTAACAGTAGGACATCCCTATTTTTCTATTAAAAACACCAGTAGTGGTAATG  
GTAAAAAAGTTTTAGTTCCCAAGGTGTCTGGCCTGCAATACAGGGTATTTAGAATTAAAT  
TGCCGGACCCCTAATAAATTTGGTTTTCCAGATACATCTTTTTTATAACCCAGAAACCCAAA  
GGTTGGTGTGGGCCTGTACAGGCTTGGAATTTGGTAGGGGACAGCCTTTAGGTGTGGGTA  
TTAGTGGGCATCCTTTATTAAACAAGTTTGATGATACTGAAACCAGTAACAAATATGCTG  
GTAAACCTGGTATAGATAATAGGGAATGTTTATCTATGGATTATAAGCAGACTCAGTTAT  
GCATTTTAGGATGCAAACCTCCTATAGGTGAACATTGGGGTAAGGGAACCCCTTGTAATA  
ATAATTCAGGAAATCCTGGGGATTGTCTCCCTACAGCTCATTAACAGTGTAATACAGG  
ATGGGGACATGGTAGATACAGGATTTGGTTGCATGGATTTTAATACCTTGCAAGCTAGTA  
AAAGTGATGTGCCATTGATATATGTAGCAGTGTATGTAAGTATCCAGATTATTTGCAAA  
TGGCTAGCGAGCCATATGGTGACAGTTTGTTCTTTTTTCTTAGACGTGAGCAAATGTTTG  
TTAGACACTTTTTTAATAGGGCCGGTACCTTAGGTGACCCTGTGCCAGGTGATTTATATA  
TACAAGGGTCTAACTCTGGCAATACTGCCACTGTACAAAGCAGTGCTTTTTTTCTCTACTC  
CTAGTGGTTCTATGGTAACCTCAGAATCCCAATTATTTAATAAAACCGTACTGGTTACAAC  
GTGCGCAGGGCCACAATAATGGCATATGTTGGGGCAATCAGTTGTTTGTACAGTTGTGG  
ATACCACTCGTAGCACTAACATGACTTTATGTGCTGAGGTTAAAAAGGAAAGCACATATA  
AAAATGAAAATTTTAAGGAATACCTTCGTATGGCGAGGAATTTGATTTACAATTTATTT  
TTCAATTGTGCAAAATTACATTAACAGCTGATGTTATGACATACATTCATAAGATGGATG  
CCACTATTTTAGAGGACTGGCAATTTGGCCTTACCCACCACCGTCTGCATCTTTGGAGG  
ACACATACAGATTTGTCACTTCTACTGCTATAACTTGTCAAAAAAACACACCACCTAAAG  
GAAAGGAAGATCCTTTAAAGGACTATATGTTTTGGGAGGTGGATTTAAAAGAAAAGTTTT  
CTGCAGATTAGATCAGTTTCCCTTTAGGTAGGAAGTTTTTTGTTACAGGCAGGGCTACAGG  
CTAGGCCCAAACTAAAACGCCCTGCATCATCGGCCCCACGTACCTCCACAAAGAAGAAAA  
AGGTTAAAAGGTAACCATTGTCTGTTGGGTAATTGTCTGTGTGCATGTATGTGTGTGTAT  
GTCAAACACAGGTTAAAAGGTAACCATTGTTTGTATGTAATTGTTTTGTGTGTGTACTG  
TGTTGTTTGCATGTTATGTATGTGTGTGCATGTTTTGTTGTAATTTGTGAGTTCCCTGTATGT  
ATGTTTTGTGTATGTATTAATAAAGTACTGTATTTACTAAACTATTTATAGTAGTCTTAT  
GTTATGTTATGGTTGCACCCACATGAGTAACAATACAGTTGCTCCTAATCTATTGCATCT  
CCTGCCCTACCCTGTGTCCCCTGCCCTACCCTGTGTCCTACTTTGTTACACTACTAATTA



GCCTTATACTCTCCATTTTGTACCATTTTGTACTATCCACCATTTTAAATCCTAACCGAA  
TTCGGTTGGTCTTGGCACAACCTTTGGTTGTCTTGGCACAGTAACAACCTATTTTTATATA  
AGTTTCAGCAAACCTGCTTAATCCTTTGGTTTCTTGCAGTCCACTGGTCTACACTTGTGT  
CCCGCCTAAACCTGACTTCTTGTGACTCACAGGTCCTGCAGTGCAGCTAAACAATACATT  
GCCTAACATTGCATGTTTTAAACTGCTTTTAGGCACATATTTTATTTAACTTTCAATGC  
ACTAATTACAGTGTGGCTTACACAAGTACATCCTACGCCAAATATGTCTTGTAACAT  
GATTAAATACTGTTACTCACCAGGTGTGCACTACACGACCGGTTACGGTTACCGTACCCA  
CAACCACTTTTTTTTATAATTA  
>gi|397022|emb|X74479.1|\_HumanPapillomavirusType45GenomicDNA  
ATACTTTTAACAATTATACTACATAAAAAAGGGTGTAAACGAAAACGGTTGCAACCAA  
AACGGTGCATATAAAAGCTTTGTGGAAAAAGTGCAATTACAGGATGGCGCGCTTTGACGATC  
CAAAGCAACGACCCTACAAGCTACCAGATTTGTGCACAGAATTGAATACATCACTACAAG  
ACGTATCTATTGCCTGTGTATATTGCAAAGCAACATTGGAACGCACAGAGGTATATCAAT  
TTGCTTTTAAAGATTTATGTATAGTGTATAGAGACTGTATAGCATATGCTGCATGCCATA  
AATGTATAGACTTTTATTCCAGAATTAGAGAATTAAGATATTATTCAAACCTCTGTATATG  
GAGAGACACTGGAAAAATAACTAATACAGAGTTGTATAATTTGTTAATAAGGTGCCTGC  
GGTGCCAGAAACCATTTGAACCCAGCAGAAAAACGTAGACACCTTAAGGACAAACGAAGAT  
TTCACAGCATAGCTGGACAGTACCGAGGGCAGTGTAATACATGTTGTGACCAGGCACGGC  
AAGAAGACTTCGCAGAGCTAGGGAAACACAAGTATAGCAATAAGATATGCATGGACCCCG  
GGAACACTGCAAGAAATTGTATTGCATTTGGAACCTCAGAATGAATTAGATCCTGTTGA  
CCTGTTGTGTACGAGCAATTAAGCGAGTCAGAGGAGGAAAACGATGAAGCAGATGGAGT  
TAGTCATGCACAACCTACCAGCCGACGAGCCGAACCACAGCGTCACAAAATTTTGTGTGT  
ATGTTGTAAGTGTGACGGCAGAATTGAGCTTACAGTAGAGAGCTCGGCAGAGGACCTTAG  
AACACTACAGCAGCTGTTTTTGTGACACCTTGTCTTTGTGTGTCCGTGGTGTGCAACTAA  
CCAATAATCTACAATGGCGGATCCAGAAGGTACCGACGGGGAGGGAACGGGGTGTAAATGG  
CTGGTTCTTTGTAGAAACAATTGTAGAGAAAAAACAGGGGATGTAATATCAGATGATGA  
GGATGAAACTGCAACAGATACAGGGTCGGATATGGTAGATTTTATTGACACACAATTATC  
CATTTGTGAACAGGCAGAGCAAGAGACAGCACAGGCATTGTTCCATGCGCAGGAAGTTCA  
GAATGATGCACAGGTGTTGCATCTTTTAAACGAAAGTTTGAGGAGGCAGCAAGGAAAA  
CAGTCCATTAGGGGAGCAGCTAAGTGTGGATACGGATCTAAGTCCACGGTTACAAGAAAT  
TTCATTAAATAGTGGGCACAAAAAAGCAAAACGACGGTTGTTTACAATATCAGATAGTGG  
CTATGGCTGTTCTGAAGTGAAGCTGCAGAGACTCAGGTAACGTAAACACTAATGCGGA  
AAATGGCGGCAGTGTACATAGTACACAAAGTAGTGGTGGGGATAGTAGTGACAATGCAGA  
AAATGTAGATCCGCATTGCAGTATTACAGAACTAAAGGAGCTATTACAAGCAAGTAACAA  
AAAGGCTGCAATGCTGGCAGTATTTAAAGACATATATGGGCTGTCATTTACGGATTTGGT  
TAGAAATTTTAAAGTGATAAAACAACATGTACAGATTGGGTAATGGCTATATTTGGAGT  
TAATCCAACGGTAGCAGAAGGCTTTAAACATTAATTAAACCAGCAACGTTATACGCCCA  
TATCCAATGTTTAGATTGTAAATGGGGAGTATTAATATTAGCTTTATTAAGATATAAATG  
TGGCAAAAATAGACTAACTGTTGCAAAAAGGCTTAAGCACATTGTTGCACGTACCTGAAAC  
ATGTATGTTAATTGAACCACCAAAATTCGGAAGTAGTGTGTCAGCATTATACTGGTATAG  
AACAGGTATATCCAATATTAGTGAAGTAAGTGGAGACACACCTGAGTGGATACAAAGACT  
GACAATTATTCAACATGGTATTGACGATAGTAATTTGATTTGTGTCAGACATGGTGCAATG  
GGCATTGTGATAATGACCTTACAGATGAAAGTGATATGGCATTTCATATGCCCAATTAGC  
AGACTGCAACAGTAATGCAGCTGCATTTTAAAAAGTAACTGCCAAGCCAAATATTTAAA  
AGATTGTGCTGTAATGTGTAGACATTATAAAAGAGCACAAAAACGCCAAATGAATATGTC  
TCAATGGATTAAATATAGATGTTCCAAAATAGATGAAGGTGGGGATTGGAGACCCATAGT  
ACAATTCCTAAGATATCAGGGAGTAGAATTTATTAGCTTTTTAAGGGCACTAAAGGAATT  
TCTTAAAGGAACACCAAAAAAAATTTGTATACTGTTATATGGACCTGCAAAATACAGGAAA  
ATCGTATTTTGGAAATGAGTTTTTATACATTTCTTACAAGGTGCAATAATATCATTGTAA  
TTCAACAGCCATTTTGGTTAGAACCGTTAGCAGATACTAAGGTAGCCATGTTGGATGA  
TGCCACACACAGTGTGGACATATTTTGATAATTATATGAGAAATGCATTAGATGGTAA  
TCCTATAAGTATAGACAGAAAGCATAAACCATTTATTACAGCTAAAATGTCTCCAATCCT  
ATTAACATCCAATATTGATCCAGCAAAAAGATAATAAATGGCCATATTTAGAAAGTAGGGT  
GACGGTATTTACATTTCCACATGCATTTCCATTTGATAAAAATGGTAATCCAGTATATGA  
AATAAATGATAAAAATTGAAATGTTTTTTTGAAGGACATGGTCCAGATTAGATTTGCA

CGAGGACGATGAAGATGCAGACACCGAAGGAATCCCTTTCGGAACGTTTAAGTGC GTTAC  
AGGACAAAATACTAGACCACTATGAAAATGACAGTAAAGACATAAACAGCCAAATAAGTT  
ATTGGCAACTTATACGTTTGGAAAATGCAATACTATTTACAGCAAGGGAACATGGTATTA  
CCAAACTAAACCACCAGGTGGTGCCTCCTATTAACATTTCAAAAAGCAAAGCACATAAAG  
CTATTGAACTGCAAATGGCCTTAAAGGGCCTTGACAAAAGCAAGTATAACAATGAGGAAT  
GGACACTGCAAGATACATGCGAGGAACTATGGAATACAGAACCGTCGCAGTGTTTTAAAA  
AAGGCGGTAAAACCGTGCACGTATACTTTGATGGCAACAAGGACAACGTATGAACATATG  
TAGTATGGGACAGTATATATTATATAAAGTGAAGACAGGGATATGGGACAAAACAGCAGCAT  
GTGTTAGCTATTGGGGTGTATATTATATAAAAAGATGGAGATACCACATATTATGTACAAT  
TAAAAAGCGAATGTGAGAAATATGGAAATAGTAATACGTGGGAAGTACAATATGGGGGCA  
ATGTAATTGATTGTAATGACTCTATGTGCAGTACCAGTGACGACACGGTATCCGCTACTC  
AGATTGTTAGACAGCTACAACACGCCTCCACGTCGACCCCCAAAACCGCATCCGTGGGCA  
CCCCAAAACCCACATCCAGACGCCGGCTACTAAGCGACCTAGACAGTGTTGACTCACAG  
AGCAGCACCACGGACGTGTCAACACCCACGTGCACAACCCGCTCCTGTGTTCAAGTACAA  
GTAACAACAAAAGAAGGAAAGTGTGTAGTGGTAACACTACGCCTATAATACACTTAAAAG  
GTGACAAAACAGTTTGAAATGTTTAAAGATATAGGCTACGCAAATATGCAGACCATTACT  
CAGAAATATCCTCCACCTGGCATTGGACAGGTTGTAATAAAAACACTGGTATATTAAGTG  
TAACATATAATAGTGAGGTACAAAGAAATACCTTTTTTGGATGTAGTTACTATTCCCTAACA  
GTGTACAAATCTCGTGGGTACATGACTATATGAATCTGTATATTGTATACAGTATGTA  
ACATTACTATGCTATCTTTAGTGTTTTTTATTGTGCTTTTTCTGTGTGCCTTTATGTGTGCT  
GCAATGTCCTCCGCTTTGTGTGAGTCTGTCTATGTGTGTGCTTTTTGCTTGGTTGTTGGTGTTC  
TTTTTATAGTTGTTATTACATCCCCATTAACAGCATTTGCTGTATACATTTGTTGCTATT  
TACTACCTATGTTTGTATTACATATGCATGCTTTACACACCATAACAATAATTACTATAAT  
GTACAGTACAGTGTAACATACCTGTGATGTGCATGTTGTTGTATTTTTGTATTTTTGTAT  
TTTTGTATTTTTGTATTTTTATATGTTTAAATAAACCATGGTATCCCACCGTGCAGCACGTC  
GCAAGCGGGCCTCTGCAACTGACTTATATAGAACATGTAAGCAATCCGGTACGTGCCCCC  
CTGATGTTATTAACAAAGTGGAAGGCACAACCTTAGCTGATAAAATTTTACAGTGGTCTA  
GCCTTGGGATATTTTTGGGTGGCCTTGGCATTTGGTACCGGCAGTGGTTCTGGAGGCCGTA  
CGGGCTATGTACCCTTAGGGGGCAGGTCTAATACTGTTGTGGATGTTGGCCCCACTAGGC  
CACCTGTGGTTATTGAACCTGTAGGGCCTACTGATCCATCTATTGTTACGTTGGTAGAGG  
ATTCCAGTGTTGTTGCCTCTGGTGCTCCGGTTCCACATTTACCGGAACCTCTGGGTTTG  
AAATTACGTCTTCTGGTACTACCACACCAGCTGTGTTGGACATCACACCTACCGTGGACT  
CTGTTTCTATTTCTGTCAACTAGTTTTACAAATCCTGCATTTTCTGATCCCTCTATTATTG  
AGGTGCCCCAAACAGGGGAGGTATCAGGTAATATATTTGTTGGTACACCAACATCGGGCA  
GCCATGGATATGAGGAAATACCTTTACAAACATTTGCATCTTCTGGGTCAGGTACGGAAC  
CCATTAGTAGTACCCCCCTCCCTACTGTGCGCGGGTACGGGGTCCCCGCCTGTATAGTA  
GGGCTAATCAACAGGTCCGTGTGTCCACCTCACAGTTTTTTAACACATCCCTCATCGTTGG  
TTACATTTGATAATCCAGCTTATGAGCCCCGGACACCACACTATCCTTTGAGCCTACCA  
GTAATGTTCCCTGATTCCGATTTTATGGATATTATTCGTTTGCATAGGCCAGCATTATCCT  
CTAGACGTGGCACTGTTAGATTTAGTAGATTGGGTCAAAGGGCAACCATGTTTACACGTA  
GTGGTAAACAAATAGGGGGTAGGGTACATTTTTACCATGATATAAGCCCCATTGCTGCTA  
CAGAGGAAATGAAATTGCAGCCTTTAATTAGTGCTACAAATGATAGTGACCTGTTTGATG  
TATATGCAGACTTCCCACCTCCTGCGTCCACTACACCTAGCACTATACACAAATCATTTA  
CATATCCAAAGTATTCCTTGACCATGCCTTCTACTGCTGCATCCTCTTACAGTAATGTTA  
CAGTACCATTAACATCTGCATGGGATGTACCTATATATACTGGCCCGGACATTATATTGC  
CATCCCATACTCCTATGTGGCCTAGTACATCTCCTACCAATGCTTCCACCACCACCTATA  
TAGGTATTCATGGCACACAATATTATTTATGGCCATGGTATTATTATTTTCCTAAAAAC  
GTAAACGTATTCCTATTTTGTGTCAGATGGCTTTGTGGCGGCCTAGTGACAGTACGGTA  
TATCTTCCACCACCTTCTGTGGCCAGAGTTGTGCAGCACTGATGATTATGTGTCTCGCACA  
AGCATATTTTATCATGCAGGAGTTCCTGATTTATTAAGTGTAGGCAATCCATATTTTAGG  
GTTGTATTTTATGGTGCAGGTAATAAACAGGCTGTTTCCTAAGGTATCCGCATATCAGTAT  
AGGGTGTTTATAGTAGCTTTACCCGATCCTAATAAATTTGGATTACCTGATTCTACTATA  
TATAATCCTGAAACACAACGTTTGGTTTGGGCATGTGTAGGTATGGAAATTTGGTCGTGGG  
CAGCCTTTAGGTATTGGCCTAAGTGGCCATCCATTTTATAATAAATTTGGATGATACAGAA  
AGTGCTCATGCAGCTACAGCTGTTATTACGCAGGATGTTAGGGATAATGTGTGCTGATTGAT

TATAAGCAAACACAGCTGTGTATTTTAGGTTGTGTACCTGCTATTGGTGAGCACTGGGGC  
AAGGGCACACTTTGTAAACCTGCACAATTGCAACCTGGTGACTGTCTCCTTTGGAACCT  
AAAAACACCATTATTGAGGATGGTGATATGGTGGATACAGGTTATGGGGCAATGGATTTT  
AGTACATTGCAGGATACAAAGTGCGAGGTTCCATTAGACATTTGTCAATCCATCTGTAAA  
TATCCAGATTATTTGCAAATGTCTGCTGATCCCTATGGGGATTCTATGTTTTTTTGCCTA  
CGCCGTGAACAACCTGTTTGAAGACATTTTGGGAATAGGGCAGGTGTTATGGGTGACACA  
GTACCTACGGACCTATATATTAAAGGCACTAGCGCTAATATGCGTGAAACCCCTGGCAGT  
TGTGTGTATTCCCCTTCTCCCAGTGGCTCTATTATTACTTCTGATTCTCAATTATTTAAT  
AAGCCATATTGGTTACATAAGGCCCAGGGCCATAACAATGGTATTTGTTGGCATAATCAG  
TTGTTTGTACTGTAGTGGACACTACCCGAGTACTAATTTAACATTATGTGCCTCTACA  
CAAAATCCTGTGCCAAGTACATATGACCCTACTAAGTTTAAGCAGTATAGTAGACATGTG  
GAGGAATATGATTTACAGTTTATTTTTTTCAGTTGTGCACTATTACTTTAACTGCAGAGGT  
ATGTCATATATCCATAGTATGAATAGTAGTATATTAGAAAATTGGAATTTTGGTGTCCCT  
CCACCACCTACTACAAGTTTGGTGGATACATATCGTTTTGTGCAATCAGTTGCTGTTACC  
TGTCAAAAGGATACTACACCTCCAGAAAAGCAGGATCCATATGATAAATTAAAGTTTGG  
ACTGTTGACCTAAAGGAAAAATTTTCTCCGATTTGGATCAATATCCCCTTGGTCGAAAG  
TTTTTAGTTCAGGCTGGGTACGTGCTAGGCCCTACCATAGGACCTCGTAAGCGTCCTGCT  
GCTTCCACGTCTACTGCATCTACTGCATCTAGGCCCTGCCAAACGTGTACGTATACGTAGT  
AAGAATAATATGTTAGCATATATATGTATGTTTGTATGTATGGTTTTGTATGTTGTATG  
TATGTATGATTTTGTGTGATATATTACTGTATTTTGTGTTGTTTGCCTGCGTGTATGTATG  
AATGTGCTTTGTGGCATGTATGGTGTTACTGTACATAATTGTGGTATTAAATAAAGTATG  
CTAATAGTGTGTGTAGGGTTGCACCCCTTGTGAGTAACAATACTATTTGTGTGTATGTGT  
ATTGCTTTGTACCCTATATTCTTTCTGTATTTCAAGTTATAAACTTGCATACTACACAG  
CATCCATTTTACTTTATAATCCTCCATTTTGGCTGTGCAACCGATTTTCGGTTGCCTGTGGCT  
TATATGTGACCTTTTAAACATAATACCTAAACTGGCACATTTACAACCCCTACATAGTTT  
AACCTACTGGCGCGCTTCTTGGCGTACATGTGGCACACCTGGTATTAGTCATTTTCCTG  
TCCAGGTGTACTAAAACAATGGCTTGCACAACCTGTATCCACACCCTATGTAATAAACTG  
CTTTTAGGCACATATTTTAGTCTGTTTTTACCTGTGCTAATTGTATAATTGGCGTGTAGA  
ACCACTTTCTTATCCAACAATCTGTCTACTTGTACATAAACTATAAACTGACTCACTTA  
TACATACATAGTTTATGCAACCGAAAAAGGTTGGGCCCTATAACACATACCTTTTCTT  
>gi|397014|emb|X74478.1|\_HumanPapillomavirus\_type\_40\_genomic\_DNA  
TTAATAACAATTGTACTGTTAGTAAAGGGTGAACCGAAAACGGTCCGACCGAAAGCGGT  
ACATATAAATTCGAACCCAAAAACCTGCTTTGGGGCCAGTATGTCTGCACGGTGCAGGCT  
CCCAGGCCAGGACCTGTATGAAGTGTGTGACCAAGTGAATATTACATTGCCTACGTTGC  
AAATTGATTGTGTGTTTTGCAAGACGGTCCATAAAACAGCTGAGGTAAGTGCCTTTGCCT  
TTAGAGAGTTATATGTTGTGTGGCGCGACGACTTTCCACACGCCGATGTCCACGGTGCC  
TGGACCTGCACGGAAGTAAACCAATACAGAACTTTAGATACGCAGCCTATGCACCAA  
CCGTGGAAGAAGAGACAGGATTAACCATTTTACAAGTAAGGATTAGATGCTGCAAGTGCC  
ACAAGCCTTTGTCTCCCGTGGAAAAAACCAACCATATTGTAAAGAAGACGCAATTCTTTA  
AATTAAAAAGATTTCGTGGACAGGGTACTGTCTACATTGCTGGAAGAAATGCATGGAGAAAG  
GCCAACGCTCGGAGACATTGTGTTAAACCTGCACCCCTGAACCTGTATGTCTAAACTGCAA  
CGAGCAATTAGACAGCTCAGACTCAGAAGATGACCATGAACAGGACCAACTAGACAGCTT  
ACACAGTAGAGAGCGTGAGCAACCCACGCAACAGGACCTGCAAGTAAATTTGCAATCATT  
TAAAGTAGTAACCTCGGTGTGTATTTTGTGAGTGTGTTGGTGCGCTTAGCAGTGCATTGTTT  
CATCACTGATATAACACAGTTCCAGCAGTTGCTGATGGGCACATTACATATAGTGTGCC  
CAACTGTGCAGCTACAGAGTGACAACAATGGCAGACTCTCCAGGTACAGAGGACGGGGG  
GCTGGGTGCTCAGGATGGTTTGTAGTAGAAGCTGTAGTGGATAAACAACGGGGGATGCT  
GTATCGGAAGATGAGGATGAGGAGGACATAGAGGATAGTGGATTTGATATGATAGATTTT  
ATTGATAATAGTGTGTTGTGGCAGAGGAACATGTAGAATAAGTAATGCACAGGCACTTTTA  
CATGTACAGCAGACATGTGCAGATGCTGCTGACCTGTGCGAGTTAAACGAAAGTACATT  
AGCCCATATGTAAGTCCTATACAATACTCAGAACCGTCTATAGACGGGGACCTAAGTCCA  
AGGCTGCATGCAATACGGCTTGGCGGCGGCCAAAAGGCTAAACGGCGGTTGTTCCAGCGT  
GTGGAGCAAAGGGACAGTGGCTATGGCTATTCTGAAGTGGAACAACAGAGAGACAGGTA  
GAGACAGAACATGGCGGACCGGAAGATACCGTGGGGGGTAGTGGGAGGGTGACCACAGAT  
GAGGCGGAAGCAGTAGAGGTTGTGGAAGACGGCAGTCATGTTATAGACCACTGTAGTCCG

CGCACACA ACTAATAGAGCTGTTTAAATGCAAGGACCTAAATGCTAAGCTGTATGGTAAG  
TTTAAAGAGCTTTATGGAGTGGGGTTTGGAGACCTGGTAAGACAGTTTAAAAGTGATAAA  
TCCACGTGTACCGATTGGGTGTATGCTGTGTTCTGGGGTTAATCCCACCATAGCCGAGGGC  
TTTCATACACTGCTGAAAAGGCAGGCATTATATTTACATACCCAATGGACGTCATGCAAA  
TGGGGTATGGTGTGCTTGCATTGTGTAGATATAAGGTGGGTAAAAATAGGGAAACAGTT  
GTTAGACAGCTATCCAAAATGTTAAATGTACCTGACAACCAGATACTGGTACAACCGCCT  
AAATTACAAAGTCCGCCTGCAGCATTATTTTGGTTTAGAGCAGGAATGGGTAATGGGAGC  
GAGGTGTCCGGCACAACACCGGAATGGATAGCTAAACAACTATGTTAGAACACAGCTTT  
GCTGACACACAGTTTTAGCCTAACAGACATGGTGCAGTGGGCATATGATAACGGGCATACA  
GATGAGTGTGAAATAGCATACTATTATGCACAAAGAGCAGACGTGGATGCAAATGCAGCA  
GCATTCTTAAAAAGTAACAATCAGGCCAAAACGTTAGGGATTGTGCATCCATGTGCAAA  
CACTATAGGTTAGCAGAAATGAGGCGCATGTCAATGGCTGAGTGGATAAAGCATAGAGGG  
GAGAAGTGTGATGAAGGCGACTGGAAACCTATAGTTAAATTATTACGCTATCAACATATA  
GATATAATAGTTTTTTTTAGCTGCATTAAAAAAATGGCTACAGGGTATACCTAAAAAAAT  
TGCATTTGTATTGTGGGTCTCCAGACACAGGAAAGTCATGTTTTTGAATGAGCCTGATG  
CACTTTATGCAAGGTACAATAATATCATATGTTAATTCCTGTAGCCATTTTTGGTTGCAA  
TCATTGGCAGATGCAAAGGTAGCTATGCTAGATGATGTTACAGCGGCATGCTGGGGGTAT  
ATGGATACACACATGAGGAACCTATTAGATGGTAACCCAACCAGCATAGATAGAAAACAT  
AAACCGTTAGCAGTAATTAAGTGCCCTCCGTTACTGTTAACGTCCTCAATATAAATATAACA  
CAGGACAGTAAGTACCAATATTTACAAAGTAGGGTTCAAGTGTTTGAATTTCCAAATCCA  
TTTTTCCATTTGACAGCAACGGCAATGCTGTGTATGAATTAATGATGCAAATTGGAACCTCC  
TTTTTTTAAAAGGTTGGCATCCAGTTTAGAGCTGCAAACACCTGGGGACGAGGATGGAGAA  
TCTAGCCAGGCGCCTAGATTTGTGCCAGGAACAGTTGTTAGAACTGTATGAACAAAACAG  
CAAAGAGCTACAGCAACATATATTGCACTGGAAATATATACGTTATGAAAGTGCAATATA  
TTATACAGCAAGACAAATGGGCATTAAACATTTTAGGCCACCAGGTGGTGCCAAGTTTAGA  
TGTTTTCAAAGGCTAAAGCCCATGCAGCAATTGAAATGCAAATGTGTTTAGAATCTTTGCA  
AAACACTGAATATAATGTAGAGCCATGGACGCTGCAGGACACAAGTCAAGAATTATGGCT  
TGCAGAACCTAAGAAATGTTTTTAAAAAAGGTGGCAAACAGTGGAAGTTAGATTTGACTG  
CAATGAAACAAATGCAATGCATTATACACTGTGGACCACAGTATATGTACAGGTGGATGA  
TGCATGGACAAAGGTAAAAGGCCAGGTGGACTACAAAGGCCTCTCATATACAGTGCACGG  
GTGCACAACATATTATGTAGACTTTGCAAAGGAAGCACAAACGTATGGGAAAACAAATAG  
GTGGACTGTTATTGTGGGTTACACGTTATATGTTCTCCTAGTACTATCGAGGAACACGG  
ACTACCCATTGTTGAGACTGCTGACGCCAGACCCCCGACCCTGCCACCGACACCCCCGA  
CGCCCCCGCCACAGCGACCACCGAAACGGTCGGCCCCGCCAGGCACCGCCAGAAAGCG  
ACGAAGAAACGGACACCTGCCCATCACCACTACTGTGGGCAAATCACTCGGAGGAGAGTA  
CGTGGACACTGCAGACAGAACACGCACGCCCTGACCCTGAAAGCAACAACGGGCACAGGAA  
CTGTGGTGGAGGTTCTTCTACACCTATAATACAATTAGAAGGTGAAGCCAATTGCTTAAA  
GTGTTTTTAGATATAGACTAGGAAAAGTGTACATTTATTTTTGTAATTCCTCAACTACATG  
GAGGTGGACCACTGAATCCAGAACCGAGAAAAATGCTATAATAACGTTAACATATAGTAG  
TGTACAGCAACGGTCTGACTTCTTAGCTATTGTAAAAATACCAAAAACAATAAACATAG  
CTTGGGTATGTTAACTGATGTAATATATGTATATATGTATATATATGGAACACCATCT  
GTGAAGGGTATTTGCTAGCACGTACCACACAACCAGCCAATCTGCTGCTATTTATTGTTAA  
TAGAGTCTACGCTTGGCATACTAGTAGTCTATATTGTTTTTTTTACTTATGCACTGTTGA  
TCTGTGTGTGTGTCCCTAATCTGTATGTGTGGAGCTCTATACTGTCTGCTATCTCCATTT  
TGTGCTTTGTAACATGGGGTGCCTAACATCTATTACTAACCTGTTTATCCTAATACTCT  
TAGTGTGGTATTTGCCCTGCGGTGGTCCTTACACATTTATTATATATCACATACAGAACC  
AATTGTAACATGTTGACCTGTCAATTGGATGATGGTGATACCTGGATGGCATTATGGATG  
TTACTTGCGTTTATAACTGTGTTGTTACTGTTATTGGTGTTTTTCATTGTAGAACCTTATAT  
TTATATAGGTATACCAAGTAATACTTTGTGTAGTAAATAAACATTTTTTTTATATTACAGC  
GTCTTTGTAATGGTGTCCAGCAGGCCCCGTAGGCGCAAGCGGGCGTCAGCTACTCAGTTAT  
ATCAAACATGCAAGGCGGCGGGCACCTGTCCACCTGATGTTGTTTCATAAGGTGGAGCAAA  
CAACCGTTGCAGATCAAATTTTTAAATGGGGGAGCATGGGAGTATTTTTTTGGCGGGCTTG  
GCATAGGTTCCGGCTCTGGCACAGGGGGCAGGGCTGGCTATGTGCCTTTGTCTACAGGTT  
CCCGGGCTGTCCCTCTAAATCTTTGGTACCTGACGTTGTTGCTAGGCCACCTGTGGTTG  
TGGATACTGTTGCACCCTCCGATCCGTCCATTGTATCTTTAATTGAGGAAAAGTAGTATTA

TTCAGTCAGGTGCCCCGTCCCTTACTATTCCAACAGAGGGTGGGTTTTTCAGTAACGTCCT  
CCGGTACAGATGTGCCTGCCATTTTAGATGTGTCGTCCACAAATACCGTGCATGTGACAG  
CCACCACACATCACAATCCTGTCTTTACTGATCCCTCGGTTGTGCAGCCCATCCCACCTG  
TGGAGGCCGGTGGTCGCCTCATAGTGTGCATTCCACTATTACTACTAGTGCTGCTGAGG  
AAATACCTTTGGACACGTTTGTGTGCCATAGTGATCCATTGTCCAGTACACCCGTTCCCTG  
GTACGTCTGGACGGCCAGGTTGGGACTGTACAGTAAGGCCTTGCAGCAGGTGGAAATTG  
TGGACCCTGCCTTTCTGTCTACCCCTCAGCGTTTAATTACATATGACAATCCAGTGTTTG  
AGAACGTGGATGATACATTGCAGTTTGAGCAGCCATCCATACATGACGCTCCGGACCCTG  
CGTTTATGGACATCATTACCTTGCACAGGCCTGCATTAACGTCTCGGCGGGGTGTCATAC  
GCTTTAGCAGGGTGGGTCAACGGGGCACCATGTACACACGGCGAGGGACCCGCATTGGGG  
GTCGTGTACACTTTTTTAGGGACATTAGTCCTATTGGTGCAGCTGATGATATTGAATTGC  
ACCCTCTAGTGGCCTCGGCACCACATACACTGGAGACACCACATACACTAGAGACACCAC  
TGGACACTACTGATGCCCTGTTTGATGTGTATGCAGACATGGATACTATAGATGATGATG  
CAGCATATGCTACATTCTCATTACATCCTGCCGATTCTACTCGTATATCTAACACATCCA  
TACCTCTTGCCACGGTTTCTGACACATTATTAACATCTGGTCCTGACATAGTGTTTCCTT  
CTATTCTGCAGGTACACCATATTTGCCTGTGTACCTTCTATACCTGCCATATCTGTAC  
TAATTCACGGTACAGATTATTATTTGCATCCTGCATACTATTTAAGAAAACGCCGAAAGC  
GCATATTAGCACATCAGTATGTGGCAACTTAATGAAAATCAAGTATATTTACCACCGCCA  
ACGCCTGTTGTACTACATTGTTAGCACAGATGAGTATGTGCAACGCACCAAGTTTATATTAT  
CATGCTGGTAGTGCCAGGTTACTGACTATAGACATCCATACTTTGAGTTAAAAAAACCC  
AATGGTGACATTTTCAGTGCCTAAGGTTTCTGGACATCAATACAGGGTATTTAGGGTACGT  
TTGCCTGACCCGAATAAGTTTGGTTTATCTGACACCTCCTTGTTTAATTCTGAAACGCAG  
CGCCTTGTGTGGGCATGTGTGGGTGTGGAGGTGGGCCGTGGCCAGCCCCTAGGGGTGGT  
GTTAGTGGCCATCCATACTTTAATAAGGATGAGGATGTGGAAAACCTCATCTGCCTATGGC  
ACAGGTCCGGGGCAGGATAGTAGGGAAAATGTAGCTATGGATTATAAACAGACACAGTTA  
TGTATGTTGGGCTGCACACCCCCAATTGGGGAATATTGGGGTAAGGGCACTCCGTGCAAT  
GCTTCTCGGGTAACCTTGGGGACTGTCTGTATTAGAATTAAAAACTGAGGTTATTTCAG  
GATGGCGACATGGTGGATACTGGCTTTGGTGTCTATGGATTTTGCTTCCTGCAGGCCAAT  
AAAAGTGATGTGCCATTGGATTTATGCACATCTATTAGTAAATATCCAGATTATTTGGGA  
ATGGCTGCAGAACCGTATGGAAATAGTTTATTTTTTTTTTCTACGCAGGGAACAAATGTTT  
GTTAGGCACTTTTTTAATAGGGCAGGTACTACTGGTGATAGTGTCCCAACTGACTTATAT  
ATAACAGGTACATCTGGTCGGACTCCTATTGCAGGCAGTATTTATTACTCCACACCAAGT  
GGATCCTTGGTTACCTCTGATTCTCAGATATTTAACAAGCCATTGTGGATACAAAAGGCC  
CAGGGCCATAACAATGGCATATGTTTTGGCAATCAGTTATTTGTTACAGTTGTAGACACC  
ACTCGTAGCACTAATTTAACCTTATGTGCTGCCACACAGTCCCCACACCAACCCCATAT  
AATAACAGTAATTTCAAGGAATATTTGCGTCATGGGGAGGAGTTTGATTTGCAGTTTATT  
TTTCAGTTATGTGTAATTACCTTAAATGCAGAGGTTATGACATATATTCATGCAATGGAT  
CCTACGTTGTTGGAGGATTGGAACTTTAAAAATTGCTCCTCCAGCCTCTGCATCCTTAGAG  
GATACATATAGGTTCCCTTACCAACAAGGCTATTGCCTGTGACGCGATGCGCCCCCAAG  
GTACGGGAGGATCCATATAAAAAATATAAAATTTGGGATGTCAATTTAACAGAAAGATTT  
TCTTCCCAATTAGATCAATTTCCATTAGGACGTAAGTTCCTTATGCAGGCTGGTGTACGT  
GCAGGGCCTAGGTTTAAATCCAGGAAGCGCCCTGCCCTTCCTCGTCTTCTCTTCTAAG  
CCAGTCACCCCCAAACGTAAAAAAACAAAGCGATGAGTATGGCTGCATATGTGTATTCTG  
GGGAATACACCCTTGCACCTCCCGTATGTGTTGGTACTTTGGAATGTATGTATGTATTGTT  
TGTGTATGTTTTGTGTTTGTGTGTATGTGTCCGTATGGTACTGTGTATGTATTGTTTGT  
ATGCTGTATACCTACGTTGTGGTTGTGTGTTTAATAAAGCTATATGTGTGGTGTGGTGTG  
GTATGGCAGTGTGATGGCGTCTTGTTCAGTGTGACCATGTACTTTTTGTGTCTAAATCC  
TCCATTTTGTACTGCGCGACCGCTTTCGGTCGCGGTTGGCACACACATACATTTGTGCAG  
AAATTTTTATTGCATGTTACATATTGTTAGGTCAACATGCCCTGCCAAAAATGTAGTATT  
AGGGTGAGGTTTGGCACACCTTTGATTGCATTTTCCCTGTACTGTACTCATCTTATTGT  
ATGCACTTCCAAACATGCTTTTAGGCACATAGTTTTGCCTAATAAAAAAGTTAGCTAATAG  
CAGTTTTTGGCAAAACATAACACTTGTGGTTAACATAGTACATATTACTCATGGTGCACAC  
CTGCGGACCGCTTTCGGTTGCTACATGTTTTATTACTTTCTACTTATTA

>gi|397005|emb|X74462.1|\_Human\_papillomavirus\_type\_3\_genomic\_DNA  
TCTAACTATAATTATAAATAACAATGCACATAATAAAAAGTAGGGAGTAACCGAAAACGG

TACGACCGAATGGGGTACATATAAAAGGAGGCACATAATGCATGGCAGTAGCCATGTCTA  
TGGATGCAAAC TGCCCAAAAAACATATTTCTACTGTGCAGAAACACCGGAATAGGATTTG  
ACGACCTTCGCCTGCACTGCATATTCTGTACGAAACAGCTGACTACAAC TGAAC TACAAG  
CATTTGCATTACGGGAAC TGAATGTGGTGTGGAGAAGGGGAGCGCCCTACGGTGCCTGTG  
CACGGTGTTTACTTGTAGAGGGCATTGCACGACGCCTAAAATATTGGGAATATTCATATT  
ATGTATCTGGCGTGGAAGAAGAGACAAAACAATCAATAGATACACAGCAAATTAGATGCT  
ACATGTGTCACAAACCACTGGTAAAGGAAGAGAAGGACAGACACCGCAACGAAAAGCGAA  
GACTGCACAAAATATCTGGTCATTGGAGGGGGAGCTGT CAGTACTGCTGGTCACGATGCA  
CGGTCCGCATCCCACGATAAAAGATATAGAATTGAGTCTTGACACCAGAGGACGTCCCTGC  
ACTATGCAATGTGCAATTAGATGAAGATGAGTATATAAATGCTGTGGAACCAGCGCAACA  
AGCGTATTGTGTAGTCACAGTGTGTCCGAAGTGTAGTTCACAACCTTCGACTGGTGGTAGA  
GTGCAGCCACGCAGATATAAGGGCCTTCGAGCAGCTTCTGCTGGGCACACTGACGGTTGT  
GTGTCCCCGCTGCGTGTAAACAGGACATGGATGATACTTCAGGTACAGAGGGGGAATGTTT  
CGAGTTGGAACGGGCTGGAGGATGGTTTATGGTAGAGGCAATAGTAGACAGGCGGACGGG  
CGATACAGTGTCAAGCGATGAGGATGAGGAGGAGGACGGAGGGGAAGATTTAGTGGATTT  
CATAGATGATAGGCCTGTAGGGGACGGACAGGAAGTGGCACAGGAAC TGTGCTGCAGCA  
AGCAGCTGCGGATGACGATGTAGAAGTGCAGACAGTAAAACGAAAGTTTGCTCCCAGTCC  
GTATTTTAGCCCTGTGTGTGTACATCCCAGCATAGAAAATGAGCTAAGTCCGAGGCTAGA  
TGCAATAAAGCTGGGGAGACAAACATCAAAAGCCAAACGCCGGCTATTTGAGCTACCGGA  
CAGTGGGTATGGCCAAACACAGGTGGATACGGAATCGGGACCAAACAGGTACAGGACAT  
TTGTAAGACAAGCCAACAAGATGGCTGCCAGGGTGCAGGATGAGGGGAGAGGTAGGAATGT  
GGGGGGAATGGCAGCCAGGAGGAGGAGCGTGCAGGAGGGGATGGGGAGGAATCGCAGAC  
TGAGAGTGTACAGACAGATACGACAGCCTGTGGAGTGTGGCAATATTTAAAAGCTAGCAA  
TCACAAAAGCAACGCTACTGGGTAAGTTTAAAGAACAATTTGGGTTAGGATTTAATGAACT  
GATTAGACACTTTAAAAGTAACAAAACAGTATGTAGCGATTGGGTGGTATGTGTGTTTGG  
TGTATACTGTACATTGGCAGAAAGCTTTAAGACGCTAATACAACCACAGTGCGAATATGC  
ACATATACAGGTACTATCCTGTCAATGGGGCATGACAGTGTAAACGTTGGTACGGTTCAA  
ACGGGCCAAAAACAGAGAGACGGTGGCTAAAGGTTTCAGCACTTTGCTAAATGTGCCAGA  
AAACCACATGTTAATAGAGCCACCAAAATTAAGAAGCGCTCCAGCAGCGCTGTACTGGTT  
CAAAACAAGCCTATCAAATTGTAGCGAGGTGTTTGGGGAAACACCAGAGTGGATAGTTAG  
GCAGACAGTGGTGGGACATGCATTAGAGGAAGCGCAGTTCAGTCTGTCAGAAATGGTGCA  
GTACGCATATGACCACGACATAACAGATGAAAGCACGTTGGCATATGAATATGCACTACA  
AGCAGATACAGATGCAAATGCAGCAGCGTTCCTAGCTAGCAATTGTCAGGCAAAATATGT  
AAAGGACGCATGCACAATGTGCAGACATTACAAAAGAGGTGAACAGGCCCGAATGAACAT  
GTCAGAATGGATAAAGTTTAGAGGAGATAAAAATACAGGGGGATGGCGATTGGAAACCAAT  
AGTACAGTATTTAAGGTACCAGGACGTAGAATTTATACCATTTCTATGCGCTCTGAAATC  
ATTCTTACAAGGAATACCAAAAAAAGTTGTATAGTGTGTTTATGGACCAGCAGATACTGG  
GAAGTCATACTTTTGCATGAGCCTGTTGAAATTTCTGGGCGGGGTAGTTATATCTTATGC  
CAATTCCAGCAGCCATTTTTGGTTGCAACCATTAGCAGAAGCCAAGATAGGTTTGCTGGA  
CGATGCAACTAGTCAGTGTGGTGTATATAGACACGTATTTAAGAAATGCTTTTAGATGG  
AAACCAGGTGTGCATAGATAGAAAGCATAGGGCCTTGCTACAAC TGAATGTCCTCCGTT  
ATTGATAACAAC TAATATAAATCCTTTGGGGGATGAAAGATGGAAGTATCTGCGCAGCAG  
ACTGCAGGTGTTTACATTTAACAACAAATTTCCATTAAC TACACAAGGAGAGCCACTGTA  
TACATTAAATGATCAAACTGGAATCCTTTTTTCAAAGGTTATGGGCACGTTTAAACCT  
TACCGATCCTGAAGACGAGGAGGACAATGGAAACACTAGCGAACCGTTTAGATGTGTGCC  
AGGACAAAATACTAGAACTGTATGAAAAGGATAGCGACAAACCTTGAGGACCAAATAATGC  
ATTGGCAATTGATGCGGTTAGAGCAAGCTTTGTTGTACAAAGCAAGGGAATGTGGATTAA  
CACACATTGGCCACCAGGTGGTGCCACCTCTTAGTGTAAACCAAGCAAAGGCACGCAGTG  
CCATTGAAGTCATGTATCTTTGCAACAATTACAGCACAGTGCACATGCACAAGACCCCT  
GGACATGCGAGACACGTACGGGAAATGTGGGACACAGTTCCCAAGAAGTGTGGA  
AAAGAGGTTTAACTGTGGAAGTCAGATATGATGGAGACGAAAACAAAGCAATGTGTTATG  
TACAATGGAGGGAAATAATTGTGCAGAACTATACAGATGATAACTGGGTGAAGGTGGCAG  
GACTGGTGTCTCATGAGGGTCTATATTACATGCACGAAGGACAGAAAACTTTTTATGTAA  
AATTTAAAGATGATGCGCGCGTGTATGGGGACACAGGAACATGGGACGTACATGTGGGAG  
GCAAAGTAATTCACCACGATTTCATTTGACCCTGTATCTAGCACACGAGAGATACCCGCTC

CTGGACCTCTGTACGCCTGTACCACCCAAGCGCCACCCAAGCCCAGGTGGGCGCGTCCG  
AAGGACCGGAGCAAAAGCGACAGCGACTCGAGACGGTCTACGGGGAGCAGCAGCAGCAAC  
AGCAGCAGCAACAGCAACAGCAACAACATACCCAAACCCCGCCCCGCAAACCACTGAAC  
GAGCAGCTCAACCATTGGACACTGACAGGACCCGGGACCGTGACACTACGTGTCCACACC  
CCATCGGGCATCGAAGTGACCCTGACTGTGTGCCTGTAATACACCTAAGAGGTGATCCTA  
ACTGTTTTAAATGTTTTAGATATAGGTTAAACAAAGGTAAAAATAAGTTATATTCAAGGA  
CCTCTTCCACATGGAGGTGGTCCTGTGAATCAGAAAATCAGTGTGCGTACGTAACCATTT  
GGTATACAAGTTATGGTCAGCGGGAAGCATTTTTGTCCACCGTAAAAAGTGCCACCAGGTA  
TTCAAGTGATACTGGGACACATGTCAATGTTTCACATAATTGTGTCCCCGCATTGTACAGT  
CTGGATTACTATTTGTGCAGGCTTTCTCTGTGGGTGTATTTGTGTGCTGCTGCTGTGTTG  
TTTTGGCTGTGTGTGCTTCCTGCGCTAACGTGCTATCTGGCAATTGTGCTTTGTGTGTAC  
TTGGTCCTGATAGCATTGTATTTACAAATTGTATCACGCATTGTACAGAATAACACATAG  
GTTTTACTATGTATCCTCTGGTACTCACAGACAACAATGGCGACCATCTTGTCTTGTGTTG  
TTGAGCCTGGAGACGTGTACATATTATTGCTGTTTATGTTAGCTGTCATACTTACATTGT  
TTATTATGTATAGACATCTGGGACTCCTGTAAGGTTGTAGTTGCAGGTCACCTGTATGTA  
TTCTTCCTTGATGTATATGCCCTAGTGTGGTATTGTACCACCGTCTTTTATACTGCTATG  
TTTTTTTTTACAGTTCAATAAAGCAACCATGGTGGCACATCGTGCAAGGCGTCGCAAGCG  
TGCATCTGCCACACAGCTTTATAGAACCTGCAAGGCCGAGGCACATGTCCCCCTGATGT  
TATTTCCAAAGTTGAGGGCACCCTTTGGCCGATCGTATTTTGCATGGGGTAGCTTGGG  
TGTTTTATTGGGGGTCTGGGCATTGGTACTGGATCCGGAACGGGGGGCGCACAGGGTA  
TGCGCAATTAGGTACACGGCCTGGTACTGTTGTTGATGTTAGTGTTCCTGCAAAACCTCC  
TGTGGTAATTGAGCCTGTGGGGCCATCGGACCCCTCCATTGTTAACCTATTGGAAGACTC  
CAGTATTATTAATTCGGGGTCCACCATAACCGACCTTTACTGGTACTGATGGATTCTGAAGT  
TATTTCTTCAGCCACAACCTACCCCTGCTGTATTAGATATTACACCTGCCAGTGACAATGT  
GGTGGTTAGTAGTACCAATTTTAGCAATCCAGCTTTTACAGAACCTTCCCTGTTGGAGGT  
TCCTCAGAAATGGTGAGGTTTCAGGGCACATACTTATTAGCACCCCCACATCTGGTACACA  
TGGTTATGAAGAAATTCCTATGGAAACCTTTGCTTCGCCAGGTACGGGAACCTGAACCTAT  
TAGTAGCACCCCTGTACCTGGTGTAAGTAGAATTGCAGGTCCCCGCTATATAGCAAAGC  
TGTCACACAGGTTAAGGTAACAGATCCTGCTTCTTGACCCGTCCTCGCTCGTTAATGAC  
ATTTGACAATCCTGTGTTTGAGCCAGAAGATGAGACTATAATATTTGAACGTCCGTACTC  
TCCCTCACAGGTGCCTGACTCTGACTTCTTGACATTTTACGTTTGCACAGGCCTGCTTT  
AACTTCTCGTAGGGGTACTGTGCGTTACAGTAGGGTAGGCCAAAAATTAAGCATGCGCAC  
TCGCAGTGGCAAGGGTCTTGGTGCTCGAGTGCATTATTATCAAGATTTAAGCCCCATAGG  
TCCTACGGAGGACATTGAAATGGAACCCCTGATTGCTCCTGCATCTGCCTCAGCCTATGA  
CTCTCTGTATGATGTGTATGCAGATGTGGACGATGCTGACATAGGTTTTACATCTGGAGG  
TCGTAGTGACACTCTGTCTAGAGGCCGTGCTACAGTGTCCCCCTGTCTCCACTCTGTC  
CACAAAGTATGGCAATGTACCATTCCCTTTGTGTCTCCTGTGGATGTGCCTTTACAACC  
TGGGCCTGATATTTTACTGCCTGCATCAGCTCAGTGGCCGTTTGTTCCTTGTCTCCTGT  
TGACACAACCTCATTATGTCTACATAGATGGCGGGGATTTTTATCTATGGCCTGTCACCTT  
CTTTTTTGCCCCGACGTCGTCGCCGTAAACGTGTCTCATATTTTCTTGAGATGGCACTGT  
GGCGCTCTAGTGACAACCTGGTGTACCTGCCTCCTACCCCTGTTTCCAAGGTTCCTCAGCA  
CGGACGACTATGTGACACGCACCAACATTTATTATTATGCAGGCAGTTCTCGCTTGCTGA  
CCGTGGGTATCCTTATTTTGCTATCCCCAAATCTTCTAATTCCAAGATGGATATTCCTA  
AGGTGTCCGCCTTTCAATATAGAGTGTTTAGGGTGCGGTTGCCCCGACCCAAATAAGTTTG  
GCCTACCAGATGCACGCATATATAACCCAGACGCCGAAAGGCTGGTCTGGGCTTGCACTG  
GGGTTGAGGTAGGCCGCGGGCTGCCTTTGGGTGTAGGCCTCAGTGGACATCCTCTTTATA  
ACAAGCTAGATGACACTGAAAACCTCTAACATAGCACATGGGGACATAGGTAAAGATTCCC  
GGGACGACATATCTGTTGACAATAAGCAAACGCAGCTATGTATTGTGGGTGTACCCAC  
CTATGGGGGAGCATTTGGGGCAAAGGAACACCATGTAAGCAGAATGCGTCACCGGTGATT  
GTCCTCCTCTAGAGCTTATTACTGCACCTATACAAGATGGCGATATGGTGGACACAGGTT  
ATGGTGCCATGGACTTTGGTAACCTGCAGTCCAATAAGTCAGACGTGCCATTAGATATTT  
GCCAGACCACCTGCAAATATCCTGATTATTTGGGTATGGCCGCTGAGCCCTATGGCGACA  
GCATGTTTTTTTTATTTGCGAAAGGAGCAGTTGTTTGCAAGACATTTTCTTAACAGAGCTG  
GTATGGCTGGAGACACCGTGCTGACGCGTTGTACATTAAAGGTGACAGTCAGAGCGGCG  
GTCGGGATAAAATTGGTAGTGCTGTGTACTGTCCTACCCCTAGTGGGTCCATGGTAACAT

CTGAAACGCAGCTATTCAATAAGCCATATTGGCTGCGGCGTGCTCAGGGACACAATAATG  
GTATATGTTGGGCCAACCAATTGTTTGTGACTGTGGTGGATACCACACGTAGTACTAATA  
TGACATTGTGTGTTTCTACTGAAACCTCGGCTACATATGATGCTACTAAATTTAAAGAGT  
ATTTAAGACACGGGGAGGAATATGATTTACAGTTTATATTCCAGTTGTGCAAAGTTACAT  
TAACTCCTGAAATTATGGCCTATTTACACACAATGAACAGTACTTTGTTGGAGGATTGGA  
ACTTTGGGTTAACCTTGCCACCGTCCACTAGCTTGGAGGACACCTATAGATTTTTAACTT  
CCTCTGCCATTACCTGCCAGAAAGATGCACCTCCCCTGAGAAGCAAGACCCCTACGCCA  
AACTAAACTTTTGGGATGTAGATCTTAAGGATCGTTTTTCCCTGGATCTTTCGCAGTTCC  
CCCTTGGCAGGAAATTTCTCATGCAGCTCGGTGTAGGTACCCGCTCTAGTATATCTGTTT  
GTAAACGCTCGGCGACAACCACATCTAGAACAGCTGCTGCAAAAAGGAAGCGCACCACAAA  
AATAGCCACATTTGTGTTTTGTATGTGTAACCTGTGTGTATGTTTTTATGTATGTACTG  
TGTGTGTAATGTGTACTGTCTGTGCTATGTGTTTGTACGTTATTATGTTGTGTGTATGTG  
TCAATAAACTGTGTACATAGTTTTATATTTTTTAATTTTTTGTAACTACTGTTCCCTGTGA  
GTAAGAAAGGTAATCTGGGTCATGCGACCGATTTCGGTTCTCAAAATGGCCGCCTTTGC  
AGGTGTGCACACAAACAATTAGTCATACTGATCTATATCCTGCGACCTGCCTTGTACACGC  
ATAGTTTTGGCTGTGATATTATCTTTTCTATAGTTTATTTTTATTGCTGCATCATTCTCCC  
TGGCACGTCTATCTGTCTCCATTGCAAAATTAACAGCTTCTGGGCACCTAACTTATTATGAC  
TACTTTCACATAATTACTGTCTTGGCTGCGTTTTCTAGTCTGCCTTGCCAATATGTGCTT  
CCAAATCTCCACCAAGACACACCTAATCCGGTCGCTGCTTGTCTTCTAGCCATAATTTAT  
GCAGTTGCTACACGTTCCCTT

>gi|396973|emb|X74474.1|\_HumanPapillomavirus\_type\_30\_genomic\_DNA

TGAAAGTTACAAGCATAGTTTATAGAAAGGAGTGACCGAAATAGGTTTTCAACCGAAAA  
CGGTACATATAAAAGCACTGTACCAAAACGGACAGTGTACCCATGGCTTTCAAATTTGAAA  
ATACAGGCGAGCGCCACGTACTGTGCACCATCTTGTGAGGTACAAGAAACATCGTTGC  
TGGAGCTACAGCTACAGTGTGTATATTGCAAGAAGGAATTATCCAGCTCAGAGGTATATA  
ATTTTGCATGTAAAGATTTAAGACTGGTATATAGGGAGGACAGCCCATATGCAGTGTGCA  
ATTTCTGTTTATTATTTTATAGTAAAGTAAGAAAGATTAGACATTACAACCTATTCATTGT  
ATGGGGCAAGCCTAGTGGCATTAACATAAAAAAGAGTTATTTGATTTATTAATAAGGTGCT  
ACAGATGTCAACAGCCGTTGACACCAGAGGAAAAACAGTTACACTGTGAATATAAGAAAC  
GGTTTCACAGAATATCACGTACGTGGACCGGGTTATGTCTGCAATGCTGGAGACACACAA  
CGTCCACTGAGACAGCAGTATAATCATGCACGGTAAAGTAACAACCTATTCAGAATATAT  
TTTGGACCTTGTACCGCAAACCTGAAATTGACCTGCATTGCTATGAGCAATTGAACAGCTC  
AGAGGAAGAGGATGAGGATGAAGTAGACAATTTACAGAAGCAGCCACAGCAAGCTAGACA  
AGAAGAACAACATCCTTGTACCTAATTAACACACAGTGTGTAGGTGTGCGTCTGCGGT  
GCAGTTGGCTGTTTACAGAGTCCACAAAGGAGCTGCGTGCCCTACAACAGATGCTTATGGG  
CGCACTGGAGCTAGTGTGTCCCCTGTGTGCAACAAGGCGGTAAACGGCAATGGCGTCACC  
TGAAGGTACAGATGATGAGGGAGGGGGGTGCACGGGATGGTTTTCATGTTGAGGCTGTAGT  
CAAGAAACGTACGGGAGATATAATATCAGAGGACGAAACAGAAGAAGATGAGGGCACAGC  
ATCAGATTTAGATGGGTTTCTAGACAATAGTAATGTAATAACAACACAGGCAGACAGGGA  
GACAGCTCAGCAGTTATTGCATGCCCAAAACACATATGCAGATACACAGACGCTGCACAA  
TTTAAACGAAAGTATTTAGGCAGTCCGTTGGGAGACATTAGTAATCAGCAATTTGTGTG  
CCGGGAAGGAGTAAACGAAGGATAATTGATACAGACGTGGCCGACAGCGGGTATGGCAA  
TACTTTGGAAGTGGAAGCAACGCAACAGGTACAGGATAATACGTATGGTAGTGGTAAACA  
GCAAGATGGAGGCTCACAGACTAGTGTGTGTAGCAGGGAAAACAGCATAGAAGCAGACAG  
TGATATGGATATAGGCGCCACGCCACCACAGCAAATACAAGAATTATTAAAATCTAGTAA  
TGTACAGGCAAAGCTGTGTTATAAATTTAAAGAGTTATTTGGAATTCCATTTTCAGAATT  
GGTACGTACATTTAAAAGTGACAGCACATGTTGTTCATGACTGGATATGTGCCATGTTTGG  
TGTTAATGAAACCTTAGCAGAGGCATTAAAAACAATTATTAATACACAGTGCATGTATTA  
CCATATACAGTGTTTAACGTGTACATGGGGCGTTGTAATATTAATGTTAATTAGATATAC  
ATGTGGAATAAATAGAAAAACAATTATAAAATCACTAAGTTCAATTGTAAATGTGCCAG  
CGAACAATGCTTGTGCAGCCACCTAAAAATACGTAGCCCTGCCGTTGCATTATACTTTTTA  
CAAAACTGCAATGTCTAATATTAGTGACATATATGGTGAGACACCAGAATGGATACAGCG  
ACAAACACAAATACAGCACAGTTTTTCAGGACTGCCAATTTGAACTGTCGAAAATGGTGCA  
ATGGGCATTTGATAATGACGTAACAGATGACAGTGACATTGCATTTTACTATGCACAGTT  
AGCAGATGTAGATAGTAATGCACAGGCTTTTTTAAAGCAATATGCAGGCCAAATATGT



AAAGGATTGTGGAATAATGTGCAGACACTATAAAAGAGCACAACAACAACAAATGAACAT  
GAAACAATGGATTACACACATATGTAGTAAAGTAGATGAGGGCGGGGACTGGAGGCCAAT  
TGTACAGTTTTTAAGATATCAAGGGGTGCGACTTCATTTTCATTTTTAAGTTATTTTAAATT  
ATTTTTACGAGGCACACCAAAACACAACCTGCCTAGTATTATATGGACCACCAAACACAGG  
AAAGTCATGTTTTGCTATGAGCCTTATACAATTTTTTTCAGGGGTCTGTTATTTTCATATGT  
AAATTCACACAGTCACTTTTTGGTTACAACCGTTAGACAATGCTAAATTGGGAATGCTAGA  
TGATGCCACAGATGCATGCTGGAGATATATAGATGAATATATGCGAAATTTATTAGATGG  
GAATCCTGTAAGTTTTAGATAGAAAACATAAAACAACCTAGTACAAATAAAAATGTCCACCAGT  
AATAATAACAACAATATTAATCCACTGCACGATGCAAAATTGCAGTACTTGCACAGTAG  
AATACATGTGGTGCCATTTCTAAATCCATTTCCAATTGATACAAATGGTAATCCTGTATA  
TCAATTAAATAATGTAAACTGGAAATGTTTTTTTGAAAGGACATGGTCCAGATTAGATTT  
GAACAACGACGAAGACAAGGAAAACCATGGAGACTCTATGCCAACGTTTAGATGCGTGCC  
AGGAGAAAATCTAGACTGTTTTGAAAACGATAGTAAAAAAATTGAAGACCATATAGTGT  
ACTGGAAGCTGTACGACATGAAAATGTTGTATTATATAAAGCAAGACAAAATAATATTA  
CTAACTACGCCACCAGGTGGTGCCATGTTTACAAGTGTGTAAAGCAAAGGCATGTGTTG  
CTATAGAAATACAAATGGCATTGGAATCATTATATAAAACAGAGTATAAAGTGGAGGAGT  
GGACATTAAGAGATGTATGTGAAAATATGTGGCATAACAGCACCAAAACAGTGTTTTTAAAA  
AAAGTGGAAAACGTATAGAAGTGTGGTTTGATGGGAAAAAAGACAATCGAACTGAATATG  
TTGTGTGGCAATGGGTGTATTACTGTGGGGACAATGGGTGGACTAAAGTGCCTTCTGTAG  
TAGATGACAAAGGTATATTATGTACATGACGGTAACAAAGTATATTATACAGACTTTA  
ATGACGAGGCAGTAAAGTATGGGTATAAAGGCACATGGGAAGTGCATATGGGAAATGAAA  
GTATTTATTGTCCCGACTCTGTGTCTAGTACCCTCAGATCCAACGTATCCCCTGTTGAAA  
CTGTTGTGCAATACAACACCTACAACACCTATCAAACCCCCACCACCTCCACGCCCCGTGG  
GCGCCAACGAAGCCGCGTCTCCGCACGGCCGGGAAAACGTCCTAGAACACAGAGCCCCG  
ACAGTACAGACACCACCAGACAGTCCGCTGCCAGAGAGTCCCACGCAAACCGTGTCAACA  
CAAACAACACAACAACAGACAGTGCCTTGGTGGAGCTACATGTTACAACACAGAAGTCG  
ACGGTGGTTATAAACTACACCTGTAGTGCATTTAAAAGGTGAACCAAACAGATTAAAGT  
GTTTAAAGATATAGGTGTCAAAAACATAAGCACCTATTTGTAAATATATCGTCTACATATC  
ATTGGACCAATACACATACAGAGTACAGCTACATTACTGTTGTATATAAAGATGAGACCC  
AGCGTGCCAACTTTTTAAATGTTGTAAAAATACCACCCAGTATAAAAAATTGTAATGGGAC  
ATATGACAGGTGTTGATATGTAACAACACATATGTTGTAATTGGTACAACAAACATGTAA  
TATTGTATTCCACATGTAAATATTATTGTGTACTATAGTTATACAACAACAAACGCCATA  
TTTTGCTGCTACGCCTGTTATATATTGCAACCATTGTTTTATTTGTTAGTTTTGTGTTTT  
TGCTTTGCTGTTTTGTGTGCCTGTGTGTCTGCCTATATGTGCCGCTTTTGCTGTCTGCCT  
CGTTGTTTTCTACCTGTTTATTACTTATAATATTGTTTTTGGTTTGTGTTGCATCGTCCT  
ACATTACTGCATTTACTATATTTTTGCTGTTTTTTTTATATACCTTTATTACTTGTATATG  
CCCATGCTGTGTGGTTAATAAACACACAATAAATTGTTTTGTAACATATTACACTTTTGC  
TTTGTGTAGGGCGTGTACTATGGTCGCCCCACGGGCACGCAGACGAAAACGGGCCTCTGC  
TACTCAGCTGTATCAAACGTGCAAGCAGGCTGGCACATGTCCATCTGATGTTATTAACAA  
AATTGAACACACAACCTTTGGCAGATAAGATATTACAATGGGGTAGTTTGTTTACATTTTT  
TGGTAATTTAGGTATAGGCACTGGTGCAGGCTCTGGGGGGCGTGCTGGTTATGTTCCGTT  
AGGTACACGGCCTACAACAGTTGTGGACGCATCCCCTGCTAGGCCACCTATTGTTGTTGA  
ATCTGTGGGTCCCTACGGACCCTTCCATTGTTACACTGGTTGAGGAGTCTAGTGTGGTTAA  
TGCTGGAGCATCATTCCTAATTTTACAGGCACTGCAGGCTTTGAGGTTACGTCTTCCTC  
TACCACAACACCTGCTGTATTAGACATTACACCTACCACTGGCTCTGTCCATGTTAGTAG  
TACCCATTTTACCAATCCCTCCTTTGTTGAACCCCCAGTTATTGAGGTTCCACAACTGG  
GGAGGTATCCGGCCATATATTGGTTAGCACTCCCACATCTGGTGTACATAGTTATGAAGA  
AATACCTATGCAAACATTGTCTGTGCATGGTACAGGCACTGAACCTATTAGTAGTACCCC  
TATTCCTGGGTTACGAGCTATAGCTGCCCTAGATTGTATCAAAGGGCCTTTCAGCAGGT  
AAAGGTCAGTGACCCACATTTCCTTACCAACCTGAAACATTAATTACTGTGGATAATCC  
AGTCTTTGAGGATGCTGACACAACCTTTAACCTTTTCACCATCGGGTGTGGCACCTGATCC  
TGACTTTTTTAGATATTGTGGCTTTACACAGACCTGCCTTTACAACACGTAGGGGTGGTGT  
GCGTTTTTAGTAGGCTTGGTACAAAGGCCACAATGCGCACAAGAAGTGGCAAACAAATAGG  
TGCTCGTGTACATTATTATTATGATGTGAGTCCTATTGCACACACTGAGGAAATTGAAAT  
GCAGCCATTATTGTCTGCAAATAATTCATTTGATGGCCTATATGATATTTATGCAAACCT

TGATGATGAGGCGCCAGTGTCTACCTATCCATTGCTACACCGTCCCGGTTGCCTAC  
CAACACTGTTTCCTTTGTCCTTTAGTAGTCAAAC TACCAATGTTACTATACCTTTGGGTAA  
ATATTGGGATGTTTCCTATTTATTCGGGCCCCGATATAGTATTGCCTACTGGTCCTACCAC  
ATGGCCCTATGCCCTCAGGCCCCATTTGACACTACACATGATGTGGTTATACATGGATC  
TACATTTGCTTTATGGCCTGTATACTTTTAAAGGCGTAGGCGTCGTAAACATGTTCCCTA  
TTTTCTTGCAGATGGCGGTGTGGCGGCCCTAGTGAAACCAAGGTTTACCTGCCTCCTACAC  
CTGTATCAAAGGTGGTACCAACAGATGCATATGTAAAGCGCACCAATATATTTTATCATG  
CAGGCAGCTCACGTTTGCTTGCTGTTGGACATCCATATTATTCTATTTCTAAGGCTGGTA  
ATTCCAAAACAGATGTTCCCAAGGTGTCTGCATTTTCAGTATAGGGTCTTTAGGGTCCGCT  
TGCCCCGATCCCAATAAGTTTGGGTTACCTGATACCAATGTATTTAATCCTGAGCAGGAGC  
GGCTGGTATGGGCCTGTGTGGGCCTGGAAATAGGCGCTGGCCAACCTTTAGGTGTTGGTG  
TTAGTGGCAATCCTTTATTTAATAAAATTGGATGACACTGAAAGTTCCTACTATAGCTAATC  
AGGATACAGCAGAGGATAGTAGGGACAACATTTCTGTTGATCCAAAGCAAACCCAATTGT  
GTATTATTGGGTGCACTCCTGCTATAGGAGAACATTGGGCTAAAGGCACTGCCTGTCGTT  
CTGCGCCCCCTGCACAAGGGGATTGTCTCCCTTGGAAC TTGTTAATTCTCCTATACAGG  
ATGGCGACATGGTTGATATTGGGTTTGGTGCCATGGATTTTAAACATTACAGGAATCTA  
AATCAGATGTGCCTTTAGATATTTTACAATCCACCTGTAAATATCCTGATTATTTAAAAA  
TGAGTGCAGACGCCTATGGCGATTCTATGTGGTTCTATTTGCGTAGGGAACAGTTATTTG  
CTAAGGCACTACTTTAATAGGGCAGGTGCTATTGGTGAACAATTACCTAGCACATTATATA  
TAAAGGTACAAATAACAGGGATCCCCCGCAAGCTCAGTATATGTTGCTACTCCTAGTG  
GGTCTATGGTAACCTCTGAGGCTCAGTTGTTTAAATAAACCTTACTGGTTGCAACGCGCAC  
AGGGACACAATAATGGCATTGTGTTGGGGCAACCAGGTATTTGTTACTGTTGTGGACACCA  
CTAGGAACACAAACATGACTATATCTGCAACCACACAAACGTTATCCACATATAATTCAA  
GCCAAATTAACAGTATGTAAGACATGTAGAGGAATATGAATTACAGTTTGTGTTTCAAC  
TGTGTAAAAATTTCACTGTCTGCAGAACTATGGCCTATTTACATACTATGAACTCCACTT  
TACTTGAGGGCTGGAATATTGGATTGTCACCCCCAGCTGCCACAAGCTTAGAGGACAAAT  
ACAGATATGTTAAAAGCCTTGCTATAACCTGTCAAAGGATCAGCCTCCTGCTGAAAAAG  
AGGACCCACTAGCTAAATATAAGTTTTGGGATGTTAACTTACAGGACAGTTTTTCTGCTG  
ACCTTGACCAATTCCCCTGAGGAGAAAGTTTTTAAATGCAACTTGGGGTTCGTACTAAAC  
CTTCTACTACTACTAAAAACGCTCGGCCCCCAGTTCCTCTACCTCTACACCATCAGCCA  
AACGCAAGCGGCGGTGATTGTTTGTGTCTGTGTATGTTTCCTTACTATTTATTGTGCATG  
AATGTATGTTTTTGTATGGATGTATGTTTGTGTTTATATGTTTCTGTATGACTGTATGTAT  
GTGTAATGACTGTATGTATGTAATAAATATGAATGAGTCTTACTTTTACGTGTGGTTACA  
TAAACTAAGGTGCGGTTGTGTCCCTAGGCATTTAGGTAGCAATTTAGGTGGCGTCCCTAT  
GTCCTCCACCTTTTTTGGTTGTTGCACACCACCTGTGCAGTTACTTTTTATATTTATATTA  
TACCACCACAGTAGTGTCCATTTTATGCATTTGTGCCCTCCATTTTACCTTTCAACCGAT  
TTCGGTTTCTTGGCATGTATGAGTGTTTTTTATATGTACATGCCAAAAGTACATTCAGCA  
AAACACTTAATCCACTGGCATGGTGCCGTTTCTGCACTTTATGTTTTTTTTTGTCAACGT  
AAGACGCCTCGCCTTATTAGTCATATATGTATGCTGCCAACTATGCTTTTATCAGCATAC  
TTTACTGCTGTTGGGCATAAGTTTTTATTGCAAACATCTGCAACACAATGATTTGGCTTG  
CAGCATATATTTTGGTAGCCAACCTATGTGTCTTGTAAGCAGGTGTGTAAAACCTTACTC  
ATATCCCACAACCGGTTACGGTTTTTGAGCAACAAGTTTATTTTATAATTAT

>gi|396964|emb|X74473.1|\_HumanPapillomavirus\_type\_27\_genomic\_DNA

TATGTGGTTTATAATATATAACTATAATCCTTTATTTAAAAATAGGGTGTAACCGAAAAC  
GGTCCGACCGAAATCGGTCGTATAAAAACAGGAGCAGGATGCGCACAAGGGCAGGGATGT  
CAGAAGAGAATCCATGCCCTAGGAACATCTTTTGCCTTGCAAACAGTATGGTCTGGAGC  
TAGAGGATTTGAGATTGCTCTGCGTGTATTGCAGACGAGCGCTTTCAGACGCTGATGTAT  
TGGCAATTTGCAATAAAAGAACTGTCTGTAGTGTGGAGAAAGGGCTTCCCTTTTGGAGCAT  
GTGGAAAATGCCTGATTGCAGCAGGAAAACCTAGACAATACAGACATTGGCATTACTCAT  
GCTACGGAGACACAGTGGAGACCGAGACAGGAATACCCATACCTCAGCTGTTTATGAGAT  
GCTATATCTGCCATAAGCCCCTGAGCTGGGAGGAGAAGGAGGCATTACTGGTTGGAAACA  
AGCGATTCCACAACATATCCGGCCGGTGACGGGACACTGCATGCAGTGCGGGTCAACAT  
GCACGGCACCCGACCCAGCCTCGCGGACATTACATTAATATTGGAAGAAATACCCGAAAT  
TATTGACCTACATTGCGACGAGCAATTTGACAGCTCAGAAGAAGAGAATAACCATCAACT  
GACAGAACCAGCTGTGCAGGCCTACGGGGTGGTAACAACCTGCTGCAAGTGCGGCAGAGC

CGTCCGGCTGGTGGTTGAGTGCGGACCAGAAGACATAAGAGATCTGGAACAGCTGTTTCT  
GAAGACGCTGAATCTAGTGTGCCCCACTGCGCGTAGCGTTATGGAGGATTCCGAAGGTA  
CCGACGGGACAGAGGAGGACGGGTGCCGGGCAGGAGGGTGGTTCCATGTGGAGGCCATTA  
TAACACACGGCCAGAGGCAGGTATCCAGTGACGAGGATGAGGACTGCACAGAAACAGGGG  
AGGATGTAGACTTCATAGACAATAGGGTTCCCGGAGATGGGCAGGAAATTCCTTGCAGC  
TATATACACAGCAAATCGCACAGGATGACGAAGCAACAGTGCAGGCCCTAAAACGAAAGT  
TCGTGGCTAGTCCTTTGTCTGCATGCTCATGCATAGAGAATGATTTAAGTCCCAGATTAG  
ATGCAATCTCCCTAAACAGAAAGTCAGAAAAGGCAAAGCGGCGCCTATTTCGAGACAGAAC  
CACCAGACAGTGGGTATGGCAATACGCAGATGGTTGTTGGAACACCAGAGGAGGTAACGG  
GGGATGAGAACAGCGAAGGGGGGCGGCCGGTGGAGGATAAGGAGGAGGAGCGTCAAGGGG  
GAGACGGAGAGGCAGACCTAACTGTACAAACTCCACAGTCAGGAACAGATGCGGCGGGTA  
GCGTGCTGACCTTACTGAGAAGTAGCAATCTGAAGGCGACGTTACTGAGTAAGTTTAAGG  
AACTGTTCCGGGTGGGATATTATGAACTGGTAAGACAGTTCAAGAGCAGCAAGACAGCAT  
GTGCAGACTGGGTGTCTGTGCCTTTGGCGTGACTATGCTGTAGCAGAGGGTATCAAAC  
AATTAATACAGCCACATACGCAATATGCACACATACAGGTACTGACCTGCTCGTGGGGCA  
TGGTGGTCTTTATGCTGCTACGATACAACTGTGCAAAGAACAGGGACACGGTGTCCAAGA  
ACATGAGCATGCTGTTAAACATCCCTGAAAAGCATATGCTCATAGAACCACCAAACTAA  
GAAGTACCCCTGCTGCCCTTGTATTGGTACAAGACGGCTATGGGTAAACGGAAGTGAGGTAT  
ATGGGGAAACACCAGAATTGGATTGTAAGACAGACGTTGGTAGGACATAGTATGGAAGATG  
AGCAGTTTACACTCTGTCTATGTTACAAATTTGCATACGACCATGACATTGTAGAGGAAA  
GTGTGCTGGCATTTCAGTATGCACAGCTCGCAGATGTAGATGCCAATGCAGCAGCATTTTC  
TAAACAGTAACTGCCAGGCCAAGTACGTGAAGGACGCAGTGACAATGTGCAGACACTACA  
AACGTGCAGAGAGGGCACAGATGAGTATGTCCCAGTGGATAACATTTCAGGGGAAATAAAG  
TATTAGAGGAAGGCGACTGGAAGCCCATAGTAAAGTTTTTTAAGGCACCAAGGGGTAGAGT  
TTGTGTGCTTCCTTGCCGCCTTTAAATTATTTTTTAAAGGCGTGCCAAAAGAAAAATTGTA  
TAGTGTTTTATGGACCTGCAGACACAGGCAAGTCATATTTCTGCATGAGCTTGTTGCAGT  
TCCTAGGTGGCGCTGTTATCTCATATGCTAATTCAGCAGCCATTTTTGGCTTCAGCCTT  
TATCTGATAGTAAGATAGGGTTACTGGACGATGCAACACCCAGTGTTGGAGCTATATAG  
ACACATATTTAAGGAATTTGCTGGATGGAAACCCAGTAAGCATAGACAGAAAACATAAAA  
CCCTGCTGCAGCTTAAATGTCCACCCTTGATGATTACAACCAACATTAATCCCCTTGAGG  
AGGACAGATGGAAATATTTGCGCAGCAGGCTAACACTGTTTACATTTAACAATCCATTTTC  
CTTTTGCAAGCCCGGGGAACCCCTGTATCCAATAAATAATGCAAACCTGGAAATGCTTTT  
TCCAAAGGTCGTGGTCCCGCTTAGACCTAAACAGTCCAGAGGAGCAGGACGACAATGGAA  
ACACTAGCGAACCGTTTAGATGCGTGCCAGGAGACGTTGCTAGAACTTTATGAAAAAGAT  
AGCAACAAACTTGAGGATCAGATTAAGCATTTGGGCGCAGGTTTCGGCTAGAAAATGTCATG  
CTGTTTAAGGCCCGGGAATGTGGAATGACACGAGTCGGCTGTACAACAGTGCCCGCCCTC  
ACCGTGTCAAAGGCTAAGGCATGTACAGCCATAGAGGTACAGCTGGCATTACAGACATTG  
ATGCAGAGTGCCATATAGCACGGAGGCATGGACCTTACGAGACACGTGTCTGGAGATGTGG  
GATGCACCTCCAAAGAAATGCTGGAAAAAGAAAGGACTGTCAGTATTAGTGAAATTTGAT  
GGCAGCAGTGACAGAGACATGATTTATACAGGCTGGCACCACATATATGTGCAGGATGCT  
AACGATGACACCTGGCACAAGGTTCCAGGGAAGGTGGACGAACTGGGATTATATTATGAG  
CACGATGGTGTGCGTGTTAATTATGTGGACTTTGGAACCTGAGTCCTTGACCTATGGGGTC  
ACTGGGACGTGGGAGGTGCACGTGGCTGGACGTGTTATTACCATACATCTGCATCTGTG  
TCTAGCACCCAGGCCACCGCCTCGGACGACGAACCACTATCCCCTATTAGACTTGCTGTA  
TCCCCAGTCCCAGCCCCAGCATCAGCAGCATCAGCAAGAACAGGAACAGCTCCGCCACCA  
AACTTGCTGTGCACCGCCCCGGCGCCACCGAGTCCGCCGGCCAAGCGCCAGCGGGTCATC  
GTCGGACAGCAGCATCTCCGGCCCCGACTCTACGCGAACGGTCGGAGAGGGGCAAGTGGAG  
TGTTACGACAAAAGGAGCATCAGTAACACTAACAGCACAGCTCCCCGGTGGGACCACGGT  
GACACTGACACTGTGCCTGTAAATCCATTTGCGAGGTGATGCAAATTTGTTTAAAGTGCTTC  
CGATACAGGGTACAAAAACATAAAGACAGCTGTATGACAGGGTGCTCCCTCCACGTGGCAC  
TGGGCCGGTGGAAAAGTGTGATAAGACAGCCTTTGTGACAGTGTGGTACACCAGTGTGGAG  
CAGCGTAAAGAGTTCCTGACAAGGGTCAACATACCTAAGGGGGTGATAGCATTGCCAGGG  
TATATGTCTGCCTTTGTATAGACCTACATGCCTGTATAGAACGTATGGTCCAGAACATTT  
CAAGGCCTGCTTAGTCAACACAGCCCTGGACTACTTCCTTTGCGTGGTGGCAGGGTGGAC  
ACATCTGCTTGTGCTACTGCTATTCCCTTTGGCTCTCTCAACTAACTGCTCTTGTGGCCTT

TTTGGTGTCTTTTTCTGTGTCTATCTAGGGTTGTGGTTGATATACGTGCAGGCCTTTTG  
GTTTTTACAATAATTGTGACATATCGCCACCATTTGCTGCTAACCTGTATATATAGTTTT  
ACCACTTGTGTTATTTGCAATGTACCCTGTTGTGTATAAAGGGTCGGAGGGGACATATCC  
TGTGATATTGTGGGGTCGTGATGATATTGACTGTCTGTTGGTGATTCTCACCCCTCATTGG  
CTTATTATTGTTGTTGTTTTATGTCCGTTTGATCCAACACACCTAACACCCCTCACCCCT  
TTTGATACATTATCTCTTTTTCATACATTGTTTTTTTTTGTACTTGCTGCGTTGTAATAAAC  
TTGCACCCATGCCTCGTGCCAAGCGTCGGAAACGCGCCTCCCCACCGACCTCTATCGTA  
CATGCAAGCAGGCAGGTACCTGCCCCCAGACATTATTCCAAGGCTAGAACAAAACACCT  
TGGCAGATAAAATATTAAAGTGGGGCAGCCTAGGGGTCTTCTTTGGCGGTCTTGGTATAG  
GCACTGGCAGTGGCACGGGGGGACGTACCGGGTATATTCTGTAGGTACCAGGCCGACCA  
CTGTGGTTGATATTGGTGTGGCACCCAAGCCACCTGTTGTTATTGAACCTGTGGGGGCCT  
CAGAGCCCTCTATAGTCACTTTGGTAGAGGACTCCAGCATCATAAATGCAGGCGCTTCCC  
ATCCCACCTTCAC TGGTACAGGTGGGTTCGAGGTTACAACCTCCACCGTTACAGACCCCG  
CTGTCTTGGATATCACCCCTCAGGTACCAGTGTGCAGGT CAGCAGCAGTAGCTTTTTGA  
ACCCACTATACACTGAACCCGCAATTGTGGAGGCTCCTCAAACAGGGGAGGTATCTGGCC  
ATGTACTTGT TAGTACAGCCACTTCAGGGTCTCACGGCTATGAGGAGATACCAATGCAGA  
CCTTTGCTACGT CAGGTGGAAGTGGTCAAGAGCCATAAGTAGCACACCCCTTCTTGCG  
TGCGTAGGGTTGCAGGGCCCCGCTTGTACAGTAGGGCAAATCAGCAGGTGCAAGTCAGGG  
ATCCTGCGTTTCTGGAAGGCTGCTGATTGTTGTTAACATTTGACAACCCCTGTGTATGACC  
CAGAGGAGACCATAATATTT CAGCATCCAGACTTTTCATGAGCCACCGATCCTGATTTCT  
TGGACATTGTGGCTTTGCATCGTCCTGCCCTTACGTCCAGACAAGGCACAGTCCGTTTCA  
GTAGATTGGGACGCAGGGCCACACTTCGCACCCGTAGTGGTAAACAGATTGGGGCTCGGG  
TGCACCTCTATCATGATATCAGCCCTGTCGTCCTGATGAATTGGAGATGGAGCCATTGT  
TACCCCCAGCTTCTACTGTAGGATCAGATGTTTTATATGATGTTTATGCTGATCCTGATG  
TCCTGCAGCCATTGGACGATTACTACCCAGCCCCTCGCGGCTCCCTGGCTAATACCACGG  
TATCTGCCTCCTCTGCATCTACACTGCGAGGGTCCACTACAGCCCCCTCTCTCGGGTGGTG  
TTGATGTGCCTGTGTATACTGGGCCTGATATTGAACCACCGTTGTTCTTGGTTTGGGGC  
CCCTCATTCTGTGGCTCCATCGTTGCCATCCTCTGTTTACATATTTGGGGGGGATTATT  
ATTTACTGCCAAGTTATATCCTGTGGCCTAAACGACGTAAACGTGTCAACTATTTCTTTG  
CAGATGGCTTTGTGGCGGCCTAATGAAAGCAAGGTATACCTACCTCCAACACCTGTTTCA  
AAGGTGATCAGTACGGATGTCTATGTCACGCGGACGAATGTCTATTACCATGGTGGCAGT  
TCTAGGCTCCTCACTGTGCGCCACCCATATTATTCTATAAAGAAGGGTAGCAATAATAGG  
TTGGCAGTGCCTAAGGTGTCCGGCTACCAATACCGTGTATTTACGTTAAGCTGCCAGAT  
CCCAATAAATTTGGCCTGCCTGATGCTGACCTATATGATCCAGACACTCAAAGACTACTG  
TGGGCGTGCGTGGGAGTAGAGGTGGGCCGAGGGCAGCCTTTAGGTGTGGGTGTGTCTGGA  
CACCCATATTATAATAGGCAGGATGACACTGAAAATGCACACACACTTGATTCAGCTGAG  
GATGGAAGGGAAAAATATTTCCATGGATTATAAACAGACCCAGCTGTTTATTCTTGGCTGT  
AAACCCCTCTATTGGTGAGCACTGGTCCAAGGGAACCACCTGTAATGGGTCTCTGCTGCT  
GGTGACTGCCCCGCCCTCCAGTTTACTAATTCAACTATTGAGGATGGGGATATGGTTGAA  
ACAGGGTTTGGTGCAATTGGATTTCCGCCACTCTGCAGTCCAATAGGTCTGATGTTCCTTTG  
GATATTTGTACAAACGTCTGTAAATATCCAGATTACCTGAAAATGGCTGCAGAGCCTTAT  
GGTGATTCCATGTTCTTTTCGCTGCGTAGAGAACAGATGTTACCCGTCATTTTTTCAAT  
AGGGCTGGTAAGATGGGTGACACAATCCAGATGAGTTGTACATTAAGGTACCACTATC  
TCGGACCCCGGCAGTCATGTGTATACCTCCACTCCTAGTGGCTCTATGGTGTCTCTGAA  
CAGCAATTGTTAATAAGCCCTACTGGCTACGGAGGGCCAGGGACATAATAATGGTATG  
TGCTGGGGCAATCGGATCTTTCTGACTGTGGTGGACACCACACGGAGTACCAATGTCTCT  
CTGTGTGCAGCTGAGGTGTCTGATAATACTAATTATAAAGCTACGAATTTAAGGAATAC  
CTCAGGCATATGGAGGAGTATGATTTGCAGTTCATTTTCCAACCTGTGCAAAATAACCCCTC  
ACTCCTGAGATAATGGCCTACATACATAATATGGATCCCCAGTTGTTGGAGGACTGGAAC  
TTCGGTGTACCCCCCGCCGCTGCCAGTTTGCAGGACACTTATAGATATTTGCAGTCC  
CAGGCTATTACGTGTCAGAAACCTACGCCCCCTAAGACCCCTACAGATCCCTATGCCAAC  
ATGACCTTCTGGGATGTGGACCTACGGGAAAGTTTTTCTATGGATCTGGACCAATTTCTCT  
TTGGGTGCGAAGTTCTTATTGTCAGCGGGGGACGACGCCACCGTGTCTCGAAAACGCACC  
GCTGTTGGGCGCGGCCACTAGTAAACGCAAACGGGTGAGGCGTTACGTGTGAGTGTCTCG  
ATAATTTCTCTGTCTACCTTTTACATAATATTTGGTGTTGTTGTGCTTATGTTTGTGT

TGTTGTTTGTACGTATGTTACATGTATACATGTATGGTATGTATCCCCCTCCCGTATGAAT  
AAACGTGTGTCATGTGTTGTGTGTTCTGTAACTGTTCTTTGTGGTGCACGGGTTTCTGCA  
CCCTATTGTCTTTTGTGTAGCCCCAGTTTCATGCGACCGTTTTCGGTTGCGTGCAGTTT  
CGGTGCGGCGCCGTTGCCAGCACAGCTTAATCCTTTAATTGCTCACATCCTAAAGTGTTAG  
CTGTGCCAGCAACAATGAGTTTGGATTTTTTGGTTGTTTAATGCTTTTTCTTTTAGTTTT  
TCCTTTCTCTGTGCCAGGCGGAGAGGGTGTGTGCATTCCTAGGCTGATTATGGTTCGTGT  
GTTGGCACAGATTTCTACTGCGTCTGCAGGAAAACCTGCAGCAACAGCACTTTGGGCGCG  
TCGTTTCTGCAGCCAACCTTTCACCTGCCAACTTGTCTTGCCGCGCATTCCAAGAAACACA  
CCTATTCCGGTCGCAATGTCTAC  
>gi|396948|emb|X74471.1|\_Human\_papillomavirus\_type\_25\_genomic\_DNA  
TAACGGTAAGTCTATTGATACGGGCGCGGTTAAATTATTACTCATTCGTACTTGTGCTG  
CCAACAATCAGCATTAGTAACTTGTTCCTGCTGTATCGTTATCGACACAGGTGTGTTAT  
ACATATATATATATATATATATATATATATATATATATATATATATATATATATACACGTAGA  
CACTGCAGCATTAGGACTTATGGCAACTGCAAATGCTGAACAGAGCATAGGACCACCAGA  
GCAAGCGCAGGTTATACAGCCACCATTGCCAGCAACAATTACTGATCTAGCAGCTTTATT  
GGAAATTCATTAGATGATTGCTTAGTACCTTGCAACTTCTGTGGCAACTTTCTAACATA  
TTTAGAGATCTGTGAGTTTGATGAGAAAAGACTTAGTTTGATTGGAAGAATATCTTGT  
GTATGCCTGCTGTGCTGTTGTTGTCACAGCAACTGCCACATTTGAATTTAATGAATTTTA  
CGAAAGCAGCTGTAACAGGTAGGAAAATTGAAGACGTTACAGGTAAATCAATTTTTTGACAT  
AGATGTTAGATGTCAAACGTGCATGAAATATCTTGATGCAATTGAAAAGCTTGATATTTG  
TGGCAGAAGACGTCCTTTCCATCTAGTAAGGAGCTCTTGGAAGGAATCTGTAGGCTGTG  
TAAGCATTTCTATAATGATTGGTAAGGAGGTCACATTGCAAGATTTTACATTAGAGTTAA  
GTGAATTGCAGCCTGAGGTACAACCAGTTGACCTGTTTTGTGAAGAGGAGTTGCCGGCTG  
AGCATCAGGAAACAGAGGAGGAGCCTGCTATTGACAGAACTCCATACAAAGTTGTTGCGC  
CTTGTGGTTGCTGCGAGGTCAAGCTTCGCATCTTTGTGAAAGCCACTGATTTTGGTATTA  
GAACACTACAAAACCTTCTAATTGAAGAACTGCAGCTGTTGTGTCCGGAGTGTGCGGGGA  
ACTGCAAAACATGGCGGATCCTAAAGGTAGTACATCTAAAGAAGGGTTAATGATTGGTGT  
ATTTTGAAGCTGAATGTAGTGATATAGACAATGATTTGGAACAATTATTTGATCAAGAT  
ACAGACTCAGATATTTAGACTTATTAGATGAGAATGACGTGGAACAGGGCAATTCTCGG  
GAACTATTTTCATCTACAAGAGTGTGAGGAAAGCGAGGAGCAATTGCAAAAACCTAAACGA  
AAGTACTTAAGTCCAAAAGCTGTGCGACAGCTTAGTCCGCGATTGCAAGTATTTCTTTG  
TCACCTCAGCAGAAGTCTAAACGAAGGCTCTTTGCAGAGCAGGACAGCGGGCTCGAATTG  
ACTTTAACAAATGAAGCTGAAGATGTTTCTCCTGAGGTGGAGGTACCGGCTTTAAACTCT  
CAGCCGGTAGCTGAGGGACAATCAGGGGACATAGACATAAGTTATACAGCATTATTGCGT  
GCCAGCAATAATAAGCAATATTAATGGCAAAATTTAAAGAGGCTTTTGGGGTAGGGTTT  
AATGATCTGACACGTCAATTTAAGAGTTACAAAACCTGTTGTAATGCTTGGGTATTCTTCT  
GTATATGCAGTGCATGATGACCTTATAGAAAAGTTCAAAGCAGCTTTTGCAACAGCATTGT  
GACTATGTGTGGATCCGTTGGGATAGGAGCCATGTCATTGTTTTTAGTTTGTTTTAAGGCG  
GGAAAAAATCGTGGTACTGTTTCATAAAATTGATGACAACTATGTTAAATGTGCATGAAAAG  
CAAATATTATCGGAACCACCAAAATTAAGAAAATGTTGCTGCAGCACTGTTTTGGTATAAA  
GGATCAATGGGTTCCGGAGTATTTACATATGGCTCATATCCAGATTGGATAGCCCACCAA  
ACAATATTGGGCCATCAAAGCGCTGAAGCTAGTACATTTGATCTATCGGACATGGTTCAA  
TGGGCATTTGATAACAATTATTTAGACGAAGCAGATATTGCATATCAATATGCTAAATTG  
GCGCCAGACAATAGCAATGCTGTTGCATGGCTCGCACATAATAATCAAGCCAAATTTGTG  
CGAGAATGTGCATCCATGGTGAGATTTTATAAAAAGGGTCAGATGAAAGAAATGAGTATG  
TCTGAATGGATTTATACTAAAATTCATGAAGTGGAAGGAGAGGGTCAATGGTCCACCATT  
GTACAATTTTAAAGTATCAGCAAGTCAACTTTATAATGTTTTTAGCTGCCTTAAAAGAT  
TTACTGACCTCTGTTCCGAAACGAAATGTATACTTTTTTATGGACCCCCCAATACGGGG  
AAATCAGACTTTTACTATTGTCATTAAGTAAAGTGTAAAGGGTAGGGTATTATCATTCTGT  
AATTCCAAAAGTCAATTTTGGTTACAACCGTTGTGAGAATGTAAAATAGCTTTGCTAGAT  
GATGTACAGAGCCCCGTGTTGGGTGTACATGGACACATATCTGAGAAAATGGCTTAGATGGA  
CATTATGTGTCTATTAGATTGTAAACACAAGGCACCAATGCAGACAAAATTTCTTGCACATA  
TTGCTTACATCCAATATAAATGTGCACAATGAAGTGAATTATAGATATCTGCACAGTAGA  
ATAAAAGGATTTGAGTTTCCAAATCCTTTTCCAATGAAAGCAGACAATACTCCCCAGTTT  
GATTTAACTGACCAAAGCTGGAAATCTTTTTTTTACAAGGCTTTGGCATCAATTAGACCTG

AGTGACCAAGAAGACGAGGGCGAAAATGGAGAATCTCAGCGAGCGTTTCAATGTTCTACA  
AGATCAGCTAATGAACATTTATGAAACTGCAGCACAAACCCTTGAGGCACAAATTGAGCA  
TTGGCAGATTTTGCGAAGAGAAGCTGTGCTACTATATTTTGCTAGGCAAAAGGGTGTTAC  
ACGGCTTGGATATCAACCTGTACCTGCCTTAATGGTGTCTGAAGCAAAAGCTAAGGAAGC  
TATAGGGATGGTGTGCAACTGCAGTCATTACAAAAGTCTGAATTTGGAAAAGAGCCATG  
GTCATTGGTTGACACCAGTACAGAGACTTATAAAAGTCCACCAGAAAACCATTTCAAAAA  
AGGCCCAATGCCTATAGAGGTCATTTATGACAAAGATGCAGATAATGCCAATGCTTATAC  
CATGTGGAGATATATTTATTATGTGGATGATGATGACAAATGGCATAAAAAGTGCAAGCGG  
GGTGAACCACACAGGCATATATTTTATGCACGGAAGCTTTAGACACTATTATGTGTTATT  
TGCTGATGATGCTCGTAGATATAGCAATACTGGACATTGGGAAGTAAAAAGTTAATAAGGA  
CACTGTGTTTACTCCTGTCAACAGCTCCACCCCCCGAGTCACCAGGAGGACAAGCAGA  
CTCAAACACCTCCTCCAAGACCCCCACCACTGACACCGCGTCCAGACTCTCGCCACAGG  
CTCCGGAGAACGGTCACAACAAACCAGCACCAAGGGACGGAGGTACGAACGGAGGCCCTC  
CAGCAGGACACGACGACAGCAAGCCCCAAGCGCGCCAGAGGCGATCAAGGTCCAAGTCCCG  
GTCCCGGTCCCGTCCAGTCCCGCTCCCGTATCCGATCGAGGTGCGGGTCGCGGTGCGCG  
GTCTGAATCTCAGTCGTCTAAGCGGCGATCAAGATCCAGATCCAGAAGAAAAACCTCAGC  
CACCAGAGGGAGAGGTCCAGGGTCACCCACAACCACCACCAGTGACCGAGCCGCAAGGTC  
ACCTTCCACCACCTCCTCTGCCACCTCCCAACGGTCACAACGATCGCGATCCAGGGCAGG  
GAGCAGCAGGGGGGGCGGAGGAGGCGGGGAGACGACGACACAGATTGTCTGAATCCCC  
CACCTCCAAGCGATCACGAAGAGAGTCAGGGTCTGTTAGGCTCCATGGCGTCTCTGCTGA  
CGCAGTGGGAACATCAGTTTACACAGTTAGTTTCAAGACATACAGGAAGACTTGGAAGATT  
ATTGGAAGAGGCTCTTGATCCCCAGTAATTTTAGTTAGAGGGGATGCTAACACGCTTCG  
AAGCTTTTCGCAACAGGGCAAAGCATATGTATACTGGGCTATTTAGCTCATTTAGTACGGC  
CTGGTCGTGGGTGGCTGGAGATGGCATTGAGCGTCTAGGCAGGTCCAGAATGCTCATTAG  
CTTTATTTCCAACAGTCAGAGAAAAATTTTGATGATGCTGTGAGATATCCGAAGGGAGT  
TGACCGGTCAATTTGGATCATTTGATAGCCTTTAACCTACTAACATTAGGCTTTGCTACTA  
ACACACTAACATATCTTAACCATTTATTTTTGTTTTTATATTTTATGCTATGGCGCGCG  
CCAGGCGGGTTAAGCGAGACTCTGCCACCAATATATACAGAACCTGCAACAAGCAGGCA  
CTTGTCCTCCTGATGTACTAAATAAAGTGGAATACTACAATAGCTGACAAAATTTTAC  
AATATGGCAGTGCTGGTGTGTTTTTCGGGGGTTTGGGCATAAGCACTGGAAAAGGCACAG  
GAGGAACAACAGGTATGTACCTTTGGGAGAAGGTCCGATACGTGTTGGTGGAACCCCCA  
CGGTTATTAGACCTTCTTTAGTCCCAGACACTATTGGACCATCTGACATAATACCTGTTG  
ACACTCTTAATCCAGTGGAACCCACATCCTCGTCTATTGTCCCACTCACAGAGTCTTCAG  
GTCCTGACCTTTTGCCTGGTGAGGTGGAGACAATCGCAGAAATACATCCTGGGCCTGTTG  
TACCCTCCACTGACACCCCGGTGACAACAACCTTCTAGAGGTGCCAGCGCAGTTTTAGAGG  
TTGCACCAGAGCCCACCCGCCATCGCGCGTCAGAGTTAGTGGCACACAATATCATAATC  
CATCATTTTCAGGTTATAACTGAATCCACACCTGCTCAAGGTGAAAGTTCACTGGCTGATC  
ACATTTTGGTTACTTCTGGTTCTGGAGGGCAAACAATTGGTGGCACTGCCAGTGACCTAA  
TTGAACTACAAGAGTTTCCCCTCGCTATTCATTTGAAATAGATGAACCCACACCTCCAA  
GACAAAGTAGTACACCTCTTCAAAGGATTAGGACTGCATTAAGACGTAGAGGAGGATTAA  
CAAATAGACGATTGGTGCAACAGGTACCTGTAGAAGACCCTTTATTTTTGTCTCAGCCAT  
CACGGCTAGTACGGTTTCAGTTTGACAATCCAGTATTTGAGGACGAAGTTACACAAATTT  
TTGAGCAGGATTTAAATGATTTTTCAGGAGCCTCCTGACAGGGATTTTTTAGATATTCGCT  
CATTAGGAAGGCCACAATATTCTGAAACTCCGGCTGGCTATGTACGGGTGAGTCGCCTTG  
GTCAAAGACGTACCATTGCGACTCGATCTGGGGCTCAAATAGGCTCACAAGTTCATTTT  
ATAGAGACTTAAGCAGTATAAATACTGAAGATCCTATTGAGCTACAGTTGTTAGGTCAGC  
ATTCGGGTGATGCTACAATAGTTCAAGGCCTCACAGAAAGTACCTTTGTAGATGTTAATG  
TAGATGAAAATCCATTAGCTGAAGATTTTAGTATTTCTGCACACTGATGATTTACTTT  
TGGATGAAGCTAATGAAGATTTTAGTGTTTCCAGTTGGTTGTGGGTGGTTCGGCGCTCCA  
CTTCTACTTACACTGTGCTCGTCTGTTGAACTACACGCTCTGCATCATATTATACCCAAG  
ATATTCAGGGATACTATGTGTCCTATCCTGAGGATAGAGATACTAGTAAGGACATTATTT  
ACCCTATGCCTGACCTCCCGGTGGTCATTATACACACATATGACACCAGTGGTGATTTTT  
ATTTGCATCCCAGTCTGACTACAAGGCGCAGACGCAAAAGAAAATATTTATAATTTTTTC  
TTTTACAGATGGCAGTTTGGCAAGCAGCTAGTGGTAAAGTGACCTTCCACCATCTACAC  
CTGTTGCCAGGTACAAAGCACGGATGAATATGTGCAAAGAACTAACATCTATTATCATG

CCTATAGTGACCGCCTATTAACGTGGTCACCCATATTTTAATGTGTACAACGTCCAAG  
GCTCTAAATTGCAAATTCAAAAGTGTGAGGAAATCAACACAGAGTTTTTAGGTTAAAAT  
TACCAGATCCCAATCGTTTTGCTCTTGACAGACATGTCAGTTTACAATCCTGACAAAGAAA  
GGCTGGTTTTGGGCCTGCAGAGGTATTGAAATAGGACGTGGGCAACCTTTAGGTGTGGGAA  
GTGTGGGTCACCCATTGTTTAAACAAGGTTGGCGACACAGAAAATCCAAATCCTTATAAAG  
CTAGTTCTACAGATGACAGGCAAAATGTATCATTTGACCCCAACAACACTACAGATGTTTA  
TTATAGGCTGTGCTCCATGTATAGGGGAACATTGGGATAAAGCATTACCTTGTGATGATG  
GCAATATTCAACAAGGGTCATGCCCTCCAATAGAATTAATTAATTCTGTCAATTGAAGATG  
GGGATATGGCAGACATTGGCTATGGTAATTTAAATTTTAAAGCATTACAGCAAAACAGAG  
CTGACGTAAGTCTGGATATAGTTAACGAAACCTGTAAATATCCAGACTTTCTTAAAATGC  
AAAATGATGTGTATGGGGATTCTGCTTTTTTTTATGCACGGCGGGAACAATGTTATGCCA  
GACATTTTTTTGTTAGAGGGGGCAAAACGGGTGACGATATTCAGCTGGACAAATTGATG  
AAGGAAGCATGAAAAATGCATTTTACATACCACCTAACAGTAGTCAGGCTCAATATAATA  
ATCTAGGTAACCAATGTATTTCCCAACAGTCAGTGGCTCATTTGGTATCCAGTGATGCTC  
AATTATTCAATAGGCCATTTTGGTTACAGCGAGCACAAGGTCATAACAATGGTATATGCT  
GGTTTAATCAGCTATTTGTCACTGTGGTAGACAACACACGCAACACTAATTTACAGCATAT  
CAATCAATTCAGATGGAACAGATGTTTCCAAAATCACTGATTATAATTCTCAAAAATTTA  
CAGAATATTTGAGACATGTAGAAGAATATGAGTTATCATTAAATATTACAACTTTGCAAAG  
TACCGTTGAAGGCAGAAATATGGCTCAGATTAATGCAATGAATTCGAACATTTTAGAAG  
AATGGCAATTAGGATTCGTTCCCTGCACCGGACAATTCTATTAGGATACTTATCGCTACA  
TTGATTCTTTAGCCACACGTTGTCCAGATAAAAAATCCTCCTAAGGAAAAAGTAGATCCTT  
ATAAAAATTTACACTTTTTGGGATGTAGATTTAACAGAACGCCTTTCTTTAGATTTAGATC  
AATATTCACTGGGACGTAAGTTTTTATTTTACAGGCTGGTTTGCAGCAAAACAACCGTAAACG  
GTACAAAAACAGTTTTCTCCCGAATATCTACTAGGGGAATAAAAAAGAAAACGTAAAAATT  
AGAAATTACCGCTTTTCGATACAATAAAGTCAACTTTTTGCACAGTATTCAAGGAATGTTTA  
TTTGTGCTGACTAACTAGGATACCAACCGCACCCGATACATAAAAGGTGAGTTATGTGCC  
AAATCAGATACAGTCTGTGCCAAACTCAGGCAGCTGCTCGCCAGATGCGTATCGTCTTTA  
GTGTTTTGACACGCTCGGATTAGGACGTTCCGCCAATGGAATACTAATATTGCCAATCGCT  
TTCGGCTCTTTGTTTGGCAGAGCTCAAGACCGT

>gi|396940|emb|X74470.1|\_HumanPapillomavirus\_type\_19\_genomic\_DNA

GGTAAGTTTATTGATACGGGCGCGGTTAGAAGTTACTCATTCGGTGCTTGTTGTTGCCAA  
CAATCAGCGTTATGAACCTGTTTCTGCCTGTATCGGTATCGACACAGGTATTATATATAT  
ATATATATATATATATATATATATATATATATATATATATATATATACACACACAGATAC  
ATTTTGCAGCTGCAAACCTTATGGCTAACGCACAGGCTACAGAAGAAGAGATAGAAATTGT  
AGAAGAGGGAACACTGCACCACAGGTCACAGAGCCACCATTACCAGCAACAATTGCTGG  
ATTAGCAGCATTGCTAGAAATACCGTTGGATGACTGTTTGTAGTGCCTTGTAATTTCTGTGG  
CAAGTTTTTTATCACATTTAGAAGCGTGCGAATTTGATGATAAAAGACTTAGTTTGATTTG  
GAAAGGTCATCTTGTGTATGCTTGCTGTGCTGCTGGTGTGCACAGCAACTGCAACATTTGA  
ATTTAATGAGTTCTATGAGCATACTGTAACAGGTAGAGAAATTGAGTTTGTAACAGGTAA  
ATCTGTCTTTGACATTGATGTTAGATGTCAAAATTGCATGAGATATCTTGATTCAATTGA  
AAAGCTTGATATCTGTGGAAGAAGACTTCCTTTTCATAAAGTAAGAGACTCTTGGAAGG  
GATCTGTAGGCTGTGTAAGCATTCTATAATGATTGGTAAAGAGGTGATATTGCAAGACA  
TTGTATTAGAATTAAGTGAGTTGCAGCCTGAGGTACAACCAGTTGACCTGTTTTGTGAAG  
AGGAGTTACCGACCGAACAGCAGGAAACAGAGGAGGAGCCTGCTATTGAAAGATCTGCGT  
ACAAAGTTGTTGTACTTTGTGGCTGCTGCAAGGTGAAGCTTCGCATCTTGTGAAAGCCA  
CGCAATTTGGTATTAGAACCCTACAGGACATCCTGATTGAAGAATTGCAACTGTTGTGCC  
CGGAGTGCCGTGGGAACCTGCAATCATGGCGGAGTCTAAAGGTAGTACATCTAAAGAAGGG  
TTTGGTGATTGGTGTATTTTGAAGCTGAATGTAGTGATGTAGAAAATGATTTGGAAAAA  
TTATTGTATGAAGATACAGATCAGATATTCAGACTTATTAGATGATAAATGACTTGGAG  
CAGGGTAACCTCTCGGGAACACTATTTTCATCAACAAGAGTGTGAGGAAAGCGAAGAGCATTTG  
CAAAAATAAAACGAAAGTACTTAAGTCCCAAAGCTGTGCGACAGCTTAGTCCGCGATTT  
GAAAGTATTTCTTTATCACCTCAGCAGAAGTCTAAACGAAGACTTTTTTGCAGAGCAGGAC  
AGCGGACTCGAGTTGACTTTTAAACAAATGAAGCTGAAGATGTTTCTTCTGAGGTGGAGGTA  
CCGGCTTTAGATTCTCAGCCGGTAGCTGGGGAACAATCAGGGGACATAGACATACATTTT  
ACAGCATTATTGCGTGCAACAATAACAGAGCAATTTTAATGGCAAAATTCAGGAAGCG

TTTGGGGTAGGGTTTTATGACTTAACACGCCAATTTAAAAGTTATAAAACATGCTGTAAT  
GCTTGGGTTATATCTGTGTATGCAGTTCATGATGATCTGCTTGAAAGCTCAAAACAGCTG  
TTGCAACAGCATTGTGACTATGTGTGGATTAGACAGACAGCAGCAATGTCATTGTTTTTA  
TTGTGCTTTAAAGTGGGAAAAAACCGTGGCACGGTGCATAAGTTAATGATGTCTATGTTA  
AATGTACATGAAAAACAAATATTATCTGAGCCACCTAAACTGAGAAATACTGCTGCTGCG  
TTATTTTTGGTATAAGGGCTGTATGGGATCTGGAGGGTTTACTTATGGTCCATACCCAGAT  
TGGATAGCACAAACAATATTAGGTCATCAAAATGCTGAAGCAAGTAGTTTTGATTTG  
TCTGAAATGATTCAATGGGCATTTTGATAACAACCACATGGACGAATCAGATATTGCGTAT  
CAATATGCAAAATTAGCACCCAGAAAAACAGCAATGCTGTGGCATGGCTTGACATAATAAT  
CAAGCTAGATTTGTTAGAGAATGTGCGGCAATGGTGCGTTTTTTATAAAAAAGGTCAAATG  
AAAGAAATGAGCATGTCTGAGTGGATTTATGCTAGAATCCATGAGGTGGACGGAGAAGGA  
CACTGGTCCACTATTGCTAAATTTTTAAGATATCAACAAGTAAATTTTATAATGTTTTTA  
GCAGCCCTAAAAGATTTATTGCATGCAGTGCCAAAACGAAATTGTATACTAATTTATGGT  
CCTCCTAATACTGGCAAATCAGCCTTTACTATGTCTACTAATAAGAGTGTAAAAGGCAGA  
GTAATATCGTTGTAAACTCCAAAAGTCAGTTTTGGTTACAACCTTTGTCAGAGTGTA  
ATAGCACTCTTAGATGACGTCACTGATCCGTGTTGGATTTACATGGATACATATTTGCGA  
AATGGTTTAGATGGGCATGTTGTGTCTTTGGATTGCAAACATAAAGCCCCCATTCAACT  
AAATTTCTCGCTTTTACTTACATCTAATATAAATGTACATAATGAGGTAAATTATAGA  
TACTTACACAGCAGAATAAGGATTTGAGTTTCCAAACCCATTTCTATGAAAGCAGAC  
AATACACCTCAATTTGAACCTTACTGACCAAGAGCTGGAAATCTTTTTTTACAAGGCTTTGG  
CAACAATTCAGAACTGAGTGACCACGAAGAGGAGGGCGAAAATGGAGAATCTCAGCGAACG  
TTTCAATGTTCTACAAGATCAGCTAATGAACATTTATGAATCTGCAGCAGAAACCTTGA  
GTCACAAATTGAACACTGGCAAATTTTGCGAAAAGAAGCTGTACTACTATATTTTGCTAG  
GCGAAAGGGTGTTACGCGAATTGGATATCAACCTGTTCCACGTTAGCAGTGTCTGAAGC  
AAAAGCTAAGGAAGCGATAGGGATGGTACTGCAGCTGCAGTCATTACAAAAATCTGAATA  
TGGAAGTGAGCCTTGGTCTTTGGTTGACACCAGTGCAGAGACGTATAGAAGTGCTCCAGA  
AAATTATTTTAAAAAGGGTCCAATGCCTATAGAGGTTATATATGACAAAAGATGCAGATAA  
TGCCAATTTGTATACCATGTGGAAATTTGTGTATTACGTGGATGAGGATGACAATTGGCA  
TAAAAGTGAAAGTGGGGTAAATCATACTGGTTTATATTTTATGCAAGGAACTTTAGACA  
CTATTATGTGTTATTTGCTGATGATGCACGTAAATATAGTGCAACTGGACATTGGGAAGT  
AAAAGTTAATAAGGAACTGTGTTTACTCCTGTCCAGCTCAACACCCCCGACTCACC  
AGGAGGACAAAGAGACCCAAACACCTCCTCCAAGACCCCCACCACCACCTGACTCCGC  
GTCCAGACTCTCGCCACAGCCTCCAGAGAACAGTCACAACAAACCAACACCAAAGGACG  
GAGGTACGAGAGACGACCTTCCAGCAGGACCCGACGACAAACCCAAACGCGCCAGAAACG  
ATCAAGGTCCAAATCCAAGTCCCGGTGCGGGTGCAGGTGCTCTTTTCGTCTAACCG  
GCGATCACGATCCAAATCCAGAAGAAAGGCCTCCACCCTAGAGGGAGAGGTCGAGGGTC  
ACCCACCGCCACCAGTGACCAATCCTCCAGGTACCCCTCAGCCACTTCTCCACAACCTC  
CTTGCGATCAAGAGGGAGCAGCAGGGTCGGGCGCAGCAGGGGGGGGCGCAGCAGGGTCGG  
GCGCAGTAGGGGGAGAGGGAAACGATCCAGAGAGTCACCATCCCCACCAACACCAAACG  
GTCACGAAGACAGTCAGGGTCTTCTAGGCTCCATGGCGTCTCTGCTGACGCAGTGGGAAC  
ATCAGTTCACACGGTTAGTGGAAGAAATACAGGAAGACTTGGAAGATTACTGGAAGAGGC  
TCTTGATCCCCCAGTAATTTTAGTTAGGGGGGAACCTAACACGCTACGTAGCTTTTCGCA  
CAGAGCTAAGCACATGTATCGAGGGCTTTTATAGTCTATTTAGCACTGCATGGTCATGGGT  
GGCTGGAGATGGAATTGAGCGTCTAGGCAGGACCAGAATGCTCATTAGTTTTGTCTCCTT  
TAATCAACGAAAGCACTTTGATGATACAGTAAGGTATCCTAAAGGTGTGGACCGATCGTT  
TGGCTCATTTGATAGCCTTTAACATACTAACTGCTTTTTTTTGCTACTAACACAATAACTT  
ACCTATATATATTTTTTTACTGCAATGGCGCGCGCCAGGCGTACTAAGCGAGATTCTGCT  
ACCAATATATACAGAACCTGCAACAAGCAGGTACCTGTCTCCTGATGTAATCAATAAA  
GTAGAACAAACTACAATAGCTGACAAAATCTTGCAATATGGCAGTGTCTGGCGTCTTTTTT  
GGGGGTTTGGGCATAAGTACTGGCAAGGGCAGAGGAGCACTGGTTACGTGCCTTTG  
GGGGAGGGTCCAGTACGTGTTGGTGGTACTGCAACGGTGATCAGGCCTTCGTTGGTTCCA  
GACACCATTGGACCATCAGACATAATACCTGTGGACACCCTGAATCCAGTAGAGCCCCT  
ACCTCCTCTATTGTTCCACTAACAGAGGCTTCAGGTTCTGACCTGTTACCTGGAGAAGTG  
GAAACCATTGCAGAGGTGCACCCTACACCTAGTATACCCTCAACAGATACCCAGTGACC  
ACAACCTCAAGTGGTGCTAGTGCTGTTTTAGAAGTTGCCCCAGAACCTGTTCTCCATCA



CGTGTAAGAGTTACTCGCACACAATATCATAATCCTTCCTTTCAAATATTAACCTGAATCT  
ACTCCAACACAGGGTGAAAGCTCCTTGGCTGATCATATTCTGGTCACTTCAGGTTCTGGA  
GGACAAACAATTGGTAGTTCTGGCAGTGATTTAATAGAACTTCAAGAATTCCTACTCGT  
TATTCTTTTGAGATAGAAGAACCTACACCTCCACGCCAAAGTAGTACTCCAATTCAAAGA  
CTTAGAACTGCATTTAGGCGAAGGGGAGGATTAACAAATAGGCGTTTAGTACAACAAGTA  
GCTGTAGATGATCCCATATTCTTAACTCAGCCTTCAAGGTTAGTTTCTTTTCAGTTTGAT  
AATCCTGCATTTGAAGAAGAAGTAACACAAATATTTGAACAAGATTTAGATAATTTTCGG  
GAGCCACCTAATAGGGATTTTTTGGATGTGCAAACCTTTAGGTAGGCCACAATATTCAGAA  
ACACCATCTGGTTACATCAGAGTTAGTCGCCTAGGCCAAAGGCGAACCATTTCGCACTCGC  
TCTGGAGCACAGATAGGTTTACAAGTTCATTTCTATAGAGACTTAAGTACTATAGACTCG  
GAAGATCCTATAGAGCTACAATTGTTAGGTCAGCATTTCTGGTGACGCTTCAATAGTTCAA  
GGTAATACAGAAAGCACATTTATAAATATTAATATTGATGAAAATCCATTAGCTGAAGAT  
TATAGTATTACTGCTAACTCAGAAGATTTGCTTTTAGATGAAGCACAGGAAGACTTTAGT  
GGGTCACAGTTAGTAGTTGGTGGGCGCCGTTCTACTTCCACATATACAGTTCCCCAATTT  
GAAACTACAAGGCTCGGATCATATTATACACAAGACACTAAAGGCTATTATGTTGCATAT  
CCTGAAGATAGAAGTACTAGTAAGGATATAATTTATCCCATGCCTGACTTGCCGTGGTT  
ATTATACATACATATGACACCAGTGGTGATTTTTACTTACATCCCAGCCTTCGCAAGCGA  
TTCAAACGAAAACGTAAATATTTATAATTTCTTTTGCAGATGGCAGTATGGCAAGCAGC  
TAGTGGTAAGGTATACCTTCCACCATCTACACCAGTTGCCAGGGTACAAAGCACGGATGA  
ATATCTCAAAGGACAAATATCTACTATCATGCTTATAGTGACCGCTACTCACTGTTGG  
TCACCCATATTTTAATGTTTTATAATGTTGCAGGATCAAAATTAGAAATTCAAAAGTTTC  
AGGAAATCAACACAGGGTTTTTAGATTAAAACTACCAGACCCTAATCGCTTTGCACTTGC  
TGATATGTCAGTGTATAATCCTGATAAAAGAAAGGTTAGTGTGGGGCTGCAGAGGAATTGA  
AATAGGTAGAGGGCAACCCTAGGTGTAGGTAGTGTAGGACATCCATTGTTTAACAAAGT  
AGGGGATACAGAGAACCCTAACTCATATAAGGGCACTTCTACTGATGATAGGCAAAATGT  
ATCATTTGACCCTAAACAGCTACAAATGTTTATTATAGGCTGTGCTCCCTGTATAGGGGA  
ACACTGGGATAAAGCATTACCATGTGCTGAGCAAGATATTCCTCAGGGATCCTGTCTCTCC  
TATAGAGTTAATTAACCTCAGTTATTGAAGATGGAGACATGGCAGATATTGGCTATGGCAA  
TTTAAATTTTAAGGCCTTACAACAAAACAGATCTGATGTCAGTTTAGATATAGTAAATGA  
AACTTGTAATATCCAGATTTCTTAAAGATGCAAAATGATGTGTATGGTGATTCTCTGCTT  
TTTTTATGCAAGGCGAGAGCAATGTTATGCTAGACATTTTTTTGTTCTGTTGGAGGCAAGAC  
AGGTGATGACATTCCAGCAGGACAAATCGATGAGGGAAGCATGAAAAATACATACTACAT  
ACCTCCTAACAATAGTCAGCAACAATATACTAATTTAGGAAATGCCATGTATTTCCCAAC  
TGTTAGTGGCTCATTAGTATCCAGTGATGCTCAATTGTTTAAACAGGCCATTTTGGTTGCA  
GCGCGCACAAAGGTCATAACAATGGCATATGCTGGTTTAAATCAGCTATTTGTCACAGTAGT  
AGACAACACGCGTAACACTAATTTTAGTATATCAGTTAATTCAGATGGAACAGATGTTGC  
TAAATTTGCAGATTATAATTCTGCAAACCTTTAAAGAATACTTAAGACATGTAGAAGAATA  
TGAAATATCTTTAATTTTACAATTATGTAAATACCTTTGAAAGCAGAAAGTTCTGGCACA  
AATCAATGCAATGAATTCTAACATATTGGAAGAATGGCAATTAGGTTTCGTGCCTGCACC  
CGATAATCCTATTTCAGGACACTTATAGATATATAGATTCTTTAGCTACTAGATGCCCTGA  
CAAAAATCCTCCTAAGGAAAAAGTAGATCCTTATAAAAACCTTACACTTTTGGAATGTAGA  
TTTATCAGAACGCCTCTCTTTAGATTTAGATCAATATGCTCTTGGCCGCAAGTTTTTTATT  
TCAGGCTGGTTTGCAACAGGCAACCGTAAACGGTACAAAACTATATCTTCACGGGTCTC  
CAGCAGAGGAACTAAAAGAAAGCGTAAAAATTAAATTTGTTCTGTTTTCTGTTACAATAAAG  
TCAACTTTTGCACAGTATTCAAGGAATGTTTATTTACTATGACTAACTAAGAAACGAACC  
GCACCCGATACATAAAGGTGAGTTATGTGCCAAATCAGATACAGTCTGAGCCGCATCAGG  
CACAGCAGCTGGCCAGATCTGATCTTCGTTGTTTTAACACGCTCGGATTAGGACTCTCGC  
CAATGGAATCATAATCTTGCCAATCTCTTTGGCACTGCACTTGCCAAAGGTAAGGACCG  
TTAAC

>gi|396932|emb|X74469.1|\_Human\_papillomavirus\_type\_17\_genomic\_DNA  
CTGGAGCCAAAGGTTTTTGGCAGAACACCATCTTGGAACAGCACCGATAACGGTAAGATTAT  
ATCTTGGAACCGTAGGCGGTACTTTCTGATTGGTTTGGCTGATAGTAGTTAACAACAATC  
TTCTCTCATAAATATATGTGACCGCCTTCGTTACCTTAAATGATCTACATACAATATGAG  
AGCTCTTACTTAAGAGCATATGGATAGGCCAAAACCTCAAACAGTGAGGGAGCTTGCTGA  
TACCTTGTGTATTCCATTAGTGGATATTTTATTACCTTGCAAGATTTTGTAAATAGGTTTTT

AGCTTACATAGAATTGGTGGCGTTTGATTTAAAAGGTTTGCAGTTAATTTGGACTGAAGA  
AGATTTTGTGTTTGCCTGTTGCAGTAGTTGTGCGTATGCTACAGCACAGTATGAATTTTC  
TAAGTTTTATGAACAATCAGTGAGTGGAAGGGAGTTAGAGGAAATAGAGCACAAGCCAAT  
AGGGGAAATACCTATTCGCTGCAAGTTTTGTTTAAAGAAATTGGATTTACTAGAGAAGTT  
AGACACTTGTATAGACATCAGCAGTTTCATAAGGTTAGACGCAATTGGAAAGGCTTGTG  
CAGACATTGTGGGTCGATAGGATGATTGGGAAAGAAGCTACAATACCAGATATAGTGCTT  
GAGCTGCAACAGCTTGTCCAGCCCACTGACCTGCATTGCTACGAAGAGTTAAGTGAAGAA  
GAGACAGAGACAGAGGAGGAGCCTCGTCGTATACCATACAAGATTGTAGCTCCGTGCTGC  
TTTTGTGGTTCTAAGCTACGGCTTATTGTTCTTGCAACGCACGCTGGAATTCGTTACAA  
GAGGAGCTTTTATTAGGTGAAGTACAGTTGGTGTGTCCTAACTGCAGAGAGAAGCTTCGC  
CATGACTGACGACAACAAAGGTACCAAAATTTGATCCTAAAGAAGGATGTAGTCAGTGGTG  
TATACTAGAAGCAGAATGTTCTGACAATAGTTTAGATGGTGATTTGGAAAAGTTATTTGA  
AGAAGGTACAGATACTGAAATTTCTGACTTAATAGATGATGAGGACATTATACAGGGAAA  
CTCCCGCAATTTGTTATGCCAGCAAGAAAGTGAGGAAAGCGAGCAACAGATACAATTGCT  
AAAACGAAAGTATTTGAGTTCACAAGAGGTTTTGCAGCTCAGTCCGCGCCTGCAGTCTAT  
CACTATATCGCCACAGCATAAGTCTAAAAGGAGATTATTTGAACGAGACAGCGGACTAGA  
ACTGTCAATTAATGAAGCTGAAGATCTTACTCAGCAGACTTTGGAGGTGCAGGAGGTATC  
GGCGACCGGTTCTGTACCGGCAGAACAGGGTGTCAAGGGATTGGGAATTGTTAAAGACCT  
TTTAAATGTAGTAATGTGAAAGCTATGTTATTGGCCAAATTCAAAGAAGCATTGAGT  
GGGATATATGGATTTAACCAGACAGTATAAAAGTAGTAAGACATGCTGTAGAGATTGGGT  
AGTTACATTGTATGCAGTACAGGATGAGTTGATAGAAAGCTCCAAACAATTGCTGCTGCA  
ACATTGTGCTTATATATGGCTACAACATATGTCACCTATGTGTTTATATTTATTATGTTT  
TAATGTGCGAAAAAGTAGGGAACTGTATCACGATTGCTTATGAATATTCTGCAAGTAGC  
AGAGGTACAAATGTTAGCAGAACCTCCAAAATTGAGAAGCATGTTGTCAGCATTATTTTG  
GTATAAAGGAAGTATGAATCCAAATGTGTATGCCACGGTGAATATCCTGAGTGGATTTT  
AACACAAACTATGATTAATCATCAAAACAGCACAGGCAACACAATTCGATCTATCTACCAT  
GATACAATTTGCTTATGATAACGAATACCTTCAAGAAGATGAAATAGCTTATCATTATGC  
TAAATTAGCAGATACAGATGCTAATGCACGAGCATTTTTACAGCATAATAGTCAAGCACG  
GTTTGTAAAAGAATGTGCAATAATGGTGAGACATTATAAGCGTGGAGAAATGAAGGAAAT  
GAGCATTTCTACGTGGGTACATAGAAAATTATTAGTTGTTGAAGGAGATGGACATTGGTC  
TGATATAGTAAAATTTATTAGATATCAGGACATTAATTTTATTAGGTTTTTAGATATATT  
TAAATCATTTCTGCACAATAAACCAAAAAAACTGTATATTAATTCATGGCCCACCAGA  
TACAGGTAAATCTATGTTTACAATGTCTCTTATAAAAGTGTTGAAAGGCAAAGTGTTATC  
ATTTGCAAATGTAGAAAGCAATTTCTGGCTTCAGCCATTAGCAGACACTAAGCTTGCATT  
AATTGATGATGTGACATTTGTATGTTGGGACTATATAGATCAATATTTAAGAAATGGATT  
GGATGGTAATGTTGTGTGTTTAGATTTGAAACATAGAGCGCCATGTCAAATTAATTTCC  
ACCATTACTATTAACATCTAATATTGATGTAATGAAAGAAGACAAATATAGATATTTACA  
CAGTAGAATTCAAAGCTTTGCTTTTCCAAAATAAGTTTCCGTTTGATAATAACAATATGCC  
ACAATTTGACTTACTGACCAAAGCTGGAAATCTTTTTTTGAAAGGCTTTGGCATCAGTT  
AGATCTGAGTGATCAAGAAGAAGAGGGAGACGATGGACAATCTCAGCGAACGTTTCAATG  
TACTGCAAGAGAACCTAATGGACATTTATGAGTCAGGTCAAGAAGATATAGAGACTCAA  
TAAACACTGGCAATTATTAAGACAGGAACAAGTACTGTTTTACTATGCCAGAAAAAATG  
GAGTGATGCGTGTAGGTTATCAACCTGTGCCTCCTTTAGCCACCAGTGAGGCTAAAGCAA  
AGGATGCTATTGGCATGGTTTTGTTATTGCAGAGCTTGCAAAAATCACCGTATGGCAAAG  
AGCCATGGACGCTAACACAACTAGTTTGGAGACTGTGCGAAGTCCACCCGCAAAGTGT  
TTAAAAAGGGTCCCTCAAACATTGAAGTTATGTTTGACAATGACCCTGAAAATCTTATGT  
CATATACAGTGTGGTCATTTATTTATTACCAAAATTTAGATGACACCTGGAATAAAGTTG  
AGGGCCGTGTTGACTATCATGGTGCATATTATATGGAAGGCTCTCTAAAAGTGTTATATA  
TTCAATTTGAAGTGGATGCTGCCAGGTTTGCCAAAACCTGGACGTTGGGAAGTGCATGTTA  
ATGAGGACATATCTTTGCTCCTGTACTAGCTCTTCGCCGGCAGCTGGAGAAGGGACCG  
ACGCGTCCCCCATCAACGCCGCATCCCGGTGCTACCAGCAAGGGGACTCTTGCCACCT  
CCGTGTCCACCCGAACCACACAACGGACATCACCACGGCGATACAGGCGGAAAGCGTCTA  
GCCCTACAGCCACCACCACCCGGCACAAAAGACAAGACATCAGACGATCAAGGTCCACCT  
CACGGGGGAGACAAGCAATCTCCAGGGGAGGGGAGCGACGCCAGCGGAGACGAGAACGCT  
CCTACTCCCGAGACTCCTCAAGATCCCCAACAGGGGAAGGGGAGGGAGCAGTGGGGGGC

CCACAACACGGTCCCAGTCGCGGTCCCTCTCCCGATCCCGATCGCGGTCACGATCGCGAT  
CCAGAGGGTCTTCTGCCGGGGGTGGCGTTGCGCCTGAGCAAGTGGGAAAATCAGTTCGAT  
CAGTTGGTAGAAAACCTGGTGGGCGACTTACAAGATTATTGGAAGAAGCTAGGGATCCCC  
CAGTAATTTTGTGTCGCGGGCGAAGCTAACAACTGAAATGCTTTCGATATAGAGCAAAAA  
AGCGATATGGCAGTTTAGTTAAATATTACAGCACTACATGGTCATGGGTGGGTGCAAATA  
CTAATGACAGAATAGGTAGATCAAGAATGTTACTAGCATTTAACACATATGATGAAAGAG  
AATTGTTTATCCAAAAAATGAAGCTACCACCAGGTGTTGATTGGTCACTAGGACATCTAG  
ATGATTTATAGGCATTACTTTTTTTAAACATTACTAACCTTGCTAAAGCTTGCTTTTGCTAC  
TAACACTTTTTTAACGTTCCCATGGCTCGCTCAAGACGCATAAAGCGTGCCCTCTGTAAC TG  
ACATCTACAGGGGTTGCAAGCAGGCTGGTACTTGCCCCCCTGATGTTATTAATAAAGTGG  
AACAGACTACAATAGCAGATAAAATTTTAAAAATATGGTAGTTCTGGTGTTTTTTTTGGTG  
GGCTGGGCATTAGCACAGGTCGTGGCACGGGTGGGGCAACAGGTTATTTCCCTTTGGGTG  
AAGGGCCTGGGGTACGCGTAGGTGGCGCCCCCACTATAGTTCGCCCTGGGGTCATACCTG  
AACTCATTGGCCCAGCGGATGTAATACCTATTGATACAGTCACTCCAATGACCCCGCAG  
CACCTAGTATTGTTACAATCACAGACAGCAGTGCTGTTGACCTATTACCCACTGAATTGG  
AAACCATTGCAGAAATACATCCTGTGCCTACAGATAATTTAGATATTGACACTCCTGTTG  
TTTCAGGAGGCAGGGATTCCAGTGCTGTTTTAGAGGTTGCTGATCCTAGTCCCCCTGTAA  
GAACAAGGGTGTCTCGAACACAGTATCACAACCCATCATTTCAAGTAATTACTGAATCTA  
CACCTTTATCTGGAGAATCAGCTATGGCGGATCATGTTTTAGTGTTTGAAGGTTTTGGTG  
GACAAAACATAGCGAGGTTCCAGGATGCAAGCCATTGATACAGCACAGGAGAGCTTTGAAA  
TGCAATCCTGGGCTAGCAGATATAGCTTTGAATTAGAAGAAGGCACACCTCCTAGAACAA  
GTACTCCAGTTC AACGTGCAGTAGAATCACTATCAAGCTTAAGAAGAGCTTTATACAATA  
GACGATTGACTGAACAAGTTGCAGTGACAGATCCACTTTTTTTTAAGTAGGCCTTACGCT  
TGGTCCAATTTTCAGTTCGATAATCCTGCCTTTGAGGAAGAAGTTACACAGCTGTTTGAAA  
GAGATATTGAAGCAGTGGAGGAACCTCCTGATAGACAGTTTTTTAGATGTTGTGCGCCTAG  
GAAGGCCTACATATTCTGAAACACCTCAGGGTTATTTACGAGTCAGTAGACTAGGTAGAA  
GAGCCAGCATTCGTACTCGCAGTGGAGCACAAAGTAGGAGCTCAGGTACATTTTTATAGAG  
ATGTTAGCACCATCGATTAGATGCCTTAGAAATGCAGTTATTGGGGGAACATTCCTGGTG  
ACACTACCATAGTTTCAGGGTCCTGTAGAAAGTTCCTTTGTAGACATTAATATTGATGAAC  
CAGGGCCTTTGAATGTAGGCATCCAAGAATCACCCTGGCTGACACTATAGAAGAAGATT  
TCAATTCTGCAGATTTGTTACTGGAAGATGCTGTAGATGACTTTAGTGGGTCTCAGCTGG  
TATTTGGCAATCCTCGCCGCAGCACAAACATCTGTAACGTGCCCCGGTTTGAAACACCTA  
GGGACACTGGCTTTTACATACATGACACTCAGGGATACACAGTAGCATATCCAGAGTCAC  
GTGACACCCTGAAATAATTCTTCCACATCCTGATACACCAACTGTAGTAATTAAATTTG  
CAGAAGCAGGAGGCAGATTTTTTATTTACACCCTAGTTTTAAAGAAACGAAAAAGAAAACGA  
AAATATTTGTAATTGTTTTGCAGATGACATTGTGGCTGCCAACGACCGGTAAAGTATACT  
TGCCTCCAACACCACAGTAGCCCCGAGTACAAAGCACGGATGAGTATGTGGAAAGAACAA  
ATATTTTTTTACCATGCTATGAGTGATCGTCTCCTAACTGTGGGACACCCATTTTATGATG  
TAAGATCTACTGATGGATTAAGAATAGAAGTCCCTAAAGTTTCTGGAAATCAGTATAGAG  
CCTTCAGAGTCACATTACCAGATCCTAATAAGTTTGCCTTGGCAGATATGTCAGTTTACA  
ATCCTGAAAAAGGAAAGATTAGTTTGGGCATGTGCAGGCCTTGAGATAGGACGAGGACAGC  
CATTAGGTGTAGGCACTACAGGACATCCCTTGTTTAATAAGTTAAGAGACACTGAAAATA  
ACAGTAGCTATCAAGGTGGATCTACTGATGATAGACAAAACACGTCATTTGACCCTAAAC  
AAGTGCAGATGTTTGTGTAGGCTGTGTACCTTGTATTGGAGAACATTGGGACAGGGCTC  
CTGTATGTGAAAATGAACAAAACAATCAAACAGGCCTGTGTCCACCATTGGAATTAAAAA  
ACACTGTTATCGAAGATGGTGACATGGTTGACATAGGCTTTGGAAACATTAATAACAAAG  
TGCTTTCATTTAATAAATCAGATGTAAGTTTAGATATAGTTAATGAAACATGCAAATATC  
CTGATTTTTTAAAGCATGGCAAATGATGTTTATGGTGATGCATGTTTCTTTTTCGCCAGAC  
GAGAGCAGTGCTATGCTAGGCATTATTTTGTGAGGGGAGGTAATGTAGGTGATGCTGTTT  
CAGATGGTTCTGTAAATCAGGATCACAAATTTTATTTACCAGCTCAAACCTGGCCAACAAC  
AGCGCACTTTGGGTAATTCCACTTATTTTCCAACGTGAAGTGGTTCTTTAGTAACATCTG  
ATGCCCAGCTTTTTTAATAGACCATTCTGGTTACGTAGAGCACAAAGGACACAATAATGGTA  
TTTTATGGGGGAATCAGATATTTGTGACTGTAGCTGACAACACTAGGAACACAAATTTTT  
CTATTAGCGTGTCTACAGAAGCTGGGGCTGTTACAGAATATAATTCTCAAAATATCAGAG  
AGTATTTAAGACATGTAGAAGAGTATCAGCTATCTTTTATTTTACAATTATGTAAAATAC

CTTTAAAAGCTGAAGTTTTAACTCAAATTAATGCAATGAACTCAGGAATTCTGGAAGACT  
GGCAGTTAGGATTTGTGCCTACACCAGATAACCCAGTGCATGATATATATAGGTACATTA  
ATTCTAAAGCCACAAAATGTCTGATGCAGTTGTAGAGAAAGAAAAAGAAGACCCTTTTG  
CAAAGTATACATTTTGGGAATGTAAATCTTACTGAGAAATTATCATTAGATTTAGATCAGT  
ATCCCCTAGGACGAAAATTTATTTTTCAGTCAGGTTTGCAGGCAAGGCCCAGAACTATTC  
GGACCTCTGTAAAAGTGCCCAAGGGTATTAACGCAAACGTTTCATGACCGCTTTCGGTCT  
CTCAATAAACAAAATAAACCAAAATGGTATGTGAAGTATTTTTTACCATGTTTCGTGACTAA  
ACCGTCTTTCGTCAACGCCAGAAACCGCACCCGGTTAATCAGATTATAAAATGCACCTGGTG  
CGATTTTATCACTGCTTTTGTGGAAGCACCGCAGGCGCCCGCCGAAA  
>gi|396924|emb|X74468.1|\_Human\_papillomavirus\_type\_15\_genomic\_DNA  
CAAGTAACTTGGCAGAACATTTTCTTGGAAAGACAGCACCGATAACGGTAAGATTATATCT  
TTGAACCGTAGGCGGTTCTTTCTGATTGGTTTGGCTGATAGTAGTTAACAACAATCACTC  
TTTATAAATATATGTAACCGCTGCGTTACTTTATTTAATCTACATACAATATGCTGAGT  
AAACTATTTAGAGAGCTATATGGATAGGCCAAAGCCTTTTCTGTGCAGCAGCTTGCAGA  
CACTCTGTGTATACCTTTAGTAGATATATTATTCCTTGTAGATTTTGTGAGAGATTTT  
AACATATATAGAATTAGTAAGTTTGAATCGTAAAGGTCTGCAGTTAATTGGACTGAGGA  
AGATTTTGTTTTGCCTGTTGTTCTAGTTGTGCATTTGCTACAGCGCAGTTGAATTTTC  
TAACTTTTATGAACAGTCGGTGTGTAGTTGGGAAATAGAGATAGTAGAACAGAAGCCTGT  
TGGAGATATTATTATTCGCTGCAAATTTTGTCTGAAGAAATTAGATTTAATTGAAAAGTT  
AGATATTTGTTACAAAGAGGAGCAATTCACAAGGTTAGACGCAATTGGAAAGGATTGTG  
TAGACATTTGTAGGGCGATAGAATGATTGGGAAAGAAGCTACTATACCAGATATAGTGCTT  
GAGCTGCAAGAGCTTGTCCAGCCCACTGACCTGCATTGCTACGAAGAGTTAAGTGAAGAA  
GAGACAGAGGAGGAGCCACGATTTATTCCTTACAAGATTGTAGTTCCGTGTTGCTTTTGT  
GATTCCAAGCTTCGACTTATAGTGGTTGCAACTCCATTTGGAATTCGCTCACAACAAGAC  
TTATTATTGGAAGAAGTTAAGTTGGTGTGTCCAGGGTGTGAGAGAAAGCTTCGCCATGTC  
TGATGACAAAAGGTACATATGATCCTAAAGAAGGCTGTAGTGATTGGTTTGTCTAGAAGC  
AGAATGCTCTGATGCTAGTTTAGATGGTGATTGGAAAAGTTATTTGAAGAAGGTACAGA  
TACTGACATTTCTGACTTAATAGATAATGAGGACACTGTACAGGGGAACTCCCGCGAATT  
ATTATGCCAGCAAGAAAGTGAGGAAAGCGAGCAACAATACTACTGGCTAAAACGAAAGTA  
TATCAGTTCACAAGAGGTTTTGCAGCTTAGCCCTCGCCTGCAGTGTATATCTATTTCCGC  
ACAGCATAAGTCTAAAAGGAGATTATTTGAACAAGACAGCGGACTAGAACTATCATTTAA  
TGAAGCTCAAGATTTTACTCAGCAGACTTTGGAGGTACCGGCGACCGATGTTGTGCCGCA  
GGGTGCCAAGGGACTGGGCATTGTTAAAGATCTTCTTAAATGTAACAATGTGAAAGCAAT  
GTTATTAGCTAAATTTAAAGAAGCGTTTGGAGTGGGGTTTATGGAATTAAGTAGACAATA  
TAAAAGCAGCAAAACATGCTGTAGAGACTGGGTACTGACTGTTTATGCTGTACAAGATGA  
GCTGTTAGAAAAGTTCTAAACAATTGTTGATTCAACACTGTGCATATATTTGGTTACATCA  
AATACCCCTATGTGCTTATATTTATTGTGCTTTAATGTTGGTAAAAGTAGAGAAACAGT  
ATTAAGATTACTTACGAATTTGTTACAAGTATCTGAAATACAAATAATAGCAGAACCACC  
AAAGCTTCGAAGTACACTGTCAGCATTATTTTGGTATAAAGGAAGTATGAATCCAAATGT  
TTATGCTCATGGAGAATATCCTGAGTGGATAATGACACAAACAATGATAAATCACCAAAC  
AGCAGAAGCTACACAGTTTGAATTTATCTACTATGGTACAATATGCATATGATAATGAATT  
GTCAGAAGAAGCAGAAATTGCTTGGCATTATGCAAAATTAGCAGATACAGATGCAAACGC  
GAGAGCATTTTACAGCATAACAGTCAGGCAAGACTTGTCAAAGACTGTGCAATAATGGT  
TAGACACTATAGACGGGGAGAAATGAAAGAAATGTCTATGTCATCATGGATACATAAAAA  
GTTATTGGTTGTTGAAGGAGAAGGACATTGGTCAGATATTGTAAAGTTTGTGAGATACCA  
AGATATAAAATTTTATACAATTTTATAGATTCATTTAAAAGCTTTTACATAATACTCCTAA  
AAAAAGTTGTATGTTAATATATGGTCCACCTGACACAGGAAAATCCATGTTTACTATGTC  
ATTAATAAAAGTCTTAAAGGGTAAAGTTTGTGTCATTTGCAAATTATAAAAGTACATTTTG  
GCTTCAACCTGTGGCAGATACAAAATAGCTTTAATAGATGATGTAACCTTATGTTTGTG  
GGATTATATAGATCAATATTTAAGAAATGCATTTGGACGGTGGTGTGTTTGTGTTTAGATAT  
GAAACACAGGCGCCATGTCAAATAAGGTTTCCACCATTAATGCTAACTTCTAACATTGA  
TATCATGAAAGAAGAAAGGTATAAATATTTACGCAGTAGAGTGCAAGCTTTTGCATTTCC  
ACATAAGTTTCCTTTTGATAGTGATAATAATCCACAATTTAAACTTACTGACCAAAGCTG  
GAAATCTTTTTTTGAAAGGCTTTGGAGACAGTTAGAGCTCAGTGATCAAGAAGACGAGGG  
AGACGATGGATACTCTCAGCGAACGTTTCAATGCACTACAAGAGAATCTAATGGACATTT

ATGAGTCAGGTCGAGACGACATAGAACTCAAATATTGCACTGGCAATATTTGAGGCAAG  
AACAAGTATTATTCTATTTTGGCAGGAAACATGGAGTTATGCGTTTAGATATCAGCCTGT  
ACCCCTTTAGCCACCAGTGAGACCAAAGCGAAAGATGCTATTGGTATGGTGATTCTGTT  
ACAAAGTTTGCAGAAGTCAGCATATGGCAAGGAGCCATGGACACTAACACAGACTAGTTT  
GGAGACTGTGAGAAGTGCACCTGCAAACCTGCTTTAAAAAAGGGCCACAGAATATTGAAGT  
TATGTTTGATAAGGATCCTGAAAACATTATGGTATACACTGTTTGGACATACATTTATTA  
CCAGACTTTAGATGACACATGGAACAAGGTGGAAGGAAAAATTGACTATCATGGCGCATA  
TTATTTGGAAGGAACCTCTTAAAGTTTATTACATACAGTTTGAAGTTGATGCAGCCAGGTT  
TGGCAAACTGGAATCTGGGAGGTGCATGTTAATGAGGACACTATCTTTGCTCCTGTTAC  
TAGCTCTTCGCCGGCAGCTGGAGAAGGGGCAACCTCCATCGACTCCGCACCCGAATCGCC  
GGCCAACAGACAGCTTTCTTCCACCTCCGTGTCTCCAGAAAACGGACACCACCACGAAC  
CGAAGCCAGACGCTACAACCGAAAAGAATCTAGCCCTACAACCACCACCACCCGGAGGCA  
GAAAAGACAAGGACAAAGACAAGAAGACACAGCAAGGCGATCAAGGTCCACCTCAAGGGG  
GAGACAAGAAATCTCCAGGGGAGGGGAACCAGCGCCGACGGCGACGATCCCGAGAAACCTC  
CATCTCCCCCGCTGGGGAAGGGGAGGGAGAGTAGAAGGGGGCCACAACAAGGTCCCA  
ATCGAAGTCCCTCTCACGATCCCGATCCCGATCCAAGTCGAGATCACGAGGGTCTTCTCC  
ACGGGGTGGCATCTCGCCTGCAGACGTGGGAAGCTCAGTTCGATCACTTGGTAGAAAACA  
TACTGGGCGACTTGAAAAGATTACTGGAAGAGGCTAGGGACCCCCAGTAATCTTGCTGCG  
CGGTGATGCTAACAAATTAATAAGCTTTTCGCTTTAGGGCAAAGAAAAAGTATCAGGATTT  
AGTAAATACTATGACACCAGCTGGTCTCTGGGTAGGGGTACAAGTAATGATAGAATTGG  
ACGCTCACGATTGTTACTGGCATTCTCTTCCAACACCGAAAGAGAGCTCTTTATCAAAT  
AATGAAACTGCCACCAGGCGTTGATTGGTTCGCTAGGATATTTAGATGATTTATGATTTTT  
GTGCTTTTTTAATCAACTAACAGTAGTGTTTTTTTTTATTGCTTTTGCTACTAACACTATACT  
AACATTCCCATGGCCCGTGCACGCAGAGTAAAACGTGCATCTGTAAGTACATTTACAGG  
GGGTGCAACAAGCAGGTACCTGCCCCCTGATGTTCTTAATAAAGTGGAACAAACAAC  
ATTGCAGATAAAATTTTGAATATGGAAGTGCTGCTGTATTTTTTTGGTGGGCTGGGAATT  
GGTACAGGCCGTGGTTCAGGTGGTGCTACAGGTTATGTTCTTTGGGAGAAGGCCCTGGT  
GTGCGCGTAGGAGGCACCCCTACCATTGTTTCGCCCTGGGGTCACACCTGAACCTATTGGT  
CCAGCGGATGTAATACCAATTGATACAGTCACACCAATTGACCCCGCAGCACCTAGTATT  
GTCACAATAACTGACAGCAGCGCTGTTGACCTTTTACCTGAATTGGAGACAATTGCAGAA  
ATACATCCTGTACCAACAGATAATGTAGATATTGATACTCCTGTTGTTACAGGAGGTCGG  
GATTCCAGCGCTATTTTAGAAGTTGCTGATCCAGTCCTCCTGTACGAACAAGAGTGTCT  
CGCACACAATATCATAACCCATCATTTCAAATTATTACTGAGTCTACACCTTTGTCTGGC  
GAATCTGCACTAGCAGATCACGTTATTGTTTTTGAAGGTAGTGGAGGTCAAATATAGGC  
GGTTCTCGCAGTGCTGCTTTGGATGCAGCACAGGAAAGTTTTTGAATGCAAACATGGCCT  
AGTAGATACAGTTTTTGAATACAAGAAGGTACACCACCAAGATCTAGCACTCCTGTTCAA  
AGAGCAGTACAATCCCTTTCTAGTCTTAGAAGGGCTTTATATAACAGACGGCTGACTGAA  
CAAGTAGCTGTAACAGACCCTTTATTCTTTGGGACGACCCTCACGCTTGGTGCAATTTCAA  
TTTGACAATCCAACATTTGAAGAAGAAGTAACACAACTTTTGAAAGAGATGTTGAAGCA  
TTTGAAAGAGCCTCCAGATAGGCAATTTCTAGATGTAGTTCGCCTAGGAAGGCCTACTTAT  
TCTGAAACACCACAAGGTTATGTGCGTGTAAGTAGACTTGGTAGACGGGCCACAATTAGA  
ACCAGAAGTGGTGCACAAGTTGGTGCTCAAGTACATTTCTATAGGGATTTAAGTACAATT  
GATTCTGAAGCATTAGAAATGCAATTACTAGGAGAACATTCAGGTGATAGTACCATTGTT  
CAGGCTCCTATGGAAAGTTCATTTATAGATATAAATATTGATGAGCCTGATTCATTACAT  
GTGGGCCTACAGGACAGTACTGAAGCAGATGACATTGATTACAATTCTGCTGATCTTCTT  
TTAGAAGATAATATAGAAGATTTTAGTGGTCTCATTTGGTGTTTGGCAATACACGGCGC  
AGCACTACAACATATACAGTACCTAGATTTGAATCACCTAGAAATACTGGGTTTTACATA  
CAAGATGTGCATGGGTATAATGTAGCCTATCCGGAGTCCCGTGATACTACCGAAATAATA  
TTACCACAATCTGACACGCAACTGTAGTTATAAATTTTGAAGAGGCAGGTGGAGACTAT  
TATTTACATCCAAGCTTAAAAACACGTAACGAAAACGCAAATATTTGTAATTGTTTTAC  
AGATGACATTTGGCTACCGACGACGGGTAAAGTATATTTGCCACCAACACCCTGTAG  
CACGTGTACAAAGCACCGATGAATATGTGGAGAGAACTAATGTATTTTACCATGCAATGA  
GTGACCGTCTGTTAACAGTAGGGCATCCCTACTTTGATGTTAGATCTGTTAATGGAGGTA  
GCATAGAAGTTCCTAAAGTGTCTGGAAATCAATATAGAGCATTTAGGGTTACTTTTCCAG  
ATCCTAATAGATTTGCATTAGCAGACATGTCTGTCTATAATCCAGAAAAAGAAAGGTTGG

TTTGGGCCTGTGTAGGCCTTGAAATAGGTAGAGGACAACCATTAGGAGTTGGTACTTCAG  
GCCATCCTTTATTCAACAAAGTAAAAGATACAGAGAATAACAGTAATTATCAAGGCAACT  
CTACTGATGACAGGCAAAATACATCTTTTGACCCAAAGCAGGTTCAAATGTTTGTAGTAG  
GCTGTGTTCCATGTTTTAGGCGAACACTGGGATAGAGCTCTTGTTTGTGAATCAGAGAGAA  
ATAATCAGGCGGGAAAATGTCCTCCTTTGGAACCTAAAAATACAGTTATTGAAGATGGCG  
ACATGTTTGATATAGGTTTTGGTAACATTAATAACAAGGCCTTATCAGTTACTAAGTCAG  
ATGTGAGTCTGGATATAGTGAATGAAACTTGCAAATATCCAGATTTTTTAAGTATGGCAA  
ATGATGTGTATGGAGACGCTTGTTTTTTTTTTTGCAAGACGAGAACAGTGCTATGCTAGAC  
ATTACTTTGTGTCAGAGGAGGTGCAGTAGGTGATGCTCTTCCTGATGCAGCTGTCAATCAAG  
ATCATAATTTTTATTACCAGCACAAATCAACCCAACAACAAAATAACTTAGCAAATTCTA  
CTTACTTTCCACAGTTAGTGGTCTTTAGTGACATCTGATGCTCAGCTGTTTAATAGAC  
CGTTTTGGTTAAGAAGAGCTCAAGGGCATAACAATGGCATACTTTGGGGTAATCAGATGT  
TTATTACTGTTGCAGATAACACAAGGAATACAAATTTTACTATTAGTGTTACCTCTGATG  
GTAATGCCATAAATGAATATAATTCACAAAATATCAGAGAATTTTTAAGACATGTGGAAG  
AATATCAGTTATCTATTATTTTGCAATTGTGTAAAATACCTTTAAAAGCTGAGGTATTAA  
CACAAATTAATGCTATGAATTCAGGTATTTAGAAAGACTGGCAACTAGGGTTTGTTCCTA  
CACCAGACAACGCTGTACAAGATATTTATAGATATATTGACTCTAAGGCAACTAAATGTC  
CTGATGCTGTACAACCAAGGACAAAGAAGACCCATTTGGAAAGTATACATTTTGGAATG  
TAGATTTAACAGAAAAGTTATCTTTAGATTTGGATCAATATCCTTTGGGAAGAAAATTTA  
TATTTCAAGCAGGTTTGCAACGTCGCCCCAGAACTATTAATCCTCTGTAAAAGTTTCTA  
AAGGTACTAAACGCAACGTACATGACCGATTTTCGGTCGCTAATAAAACAAGTAAACCAAT  
AAGGTATGTGAAGTATTTTTTACCATGTTTCGTGACTAAACCGCATAGGTCATTGCCAACA  
ACCGCACCCGGTTAATCAGATATAAAAATGCACCTGGTGCGATTTTATCACCGCTTTTGTG  
GAAGCACCCGAGGCGCCCGCCAGAAGTCTGCTGC

>gi|396918|emb|X74467.1|\_Human\_papillomavirus\_type\_14D\_genomic\_DNA

AACGGTAAGTTATTTCTGCACCGGGTGCGGTCACTGTATTACTCACTATGTGGTTGTTGTT  
GCCAACTACCATTGCTGATAGCATGTTTTTGCCGTGAACGTTATCGACACATACATATCT  
ATGTATATATATATATATATATATATATATATATATATATATATATACTACAGAAAAAAC  
AGAGAATGCAGACTCATGGCGACAACCTGACTCTTCAACAGACAGTGCAGATGAAGGTCCT  
TCTCCTAAGAGTAACATTTGTGATAGCACAGAAACCAATCTTCTTTTATAGAGCCACCA  
TTACCTGCAACTATATTTGGCTTAGCAAACCTATTGGAAATACCACTAGATGATTGTTTA  
GTACCTTGTAACTTTTGTGGTAATTTTTTGACTCATTTAGAAGTCTGTGAATTTGATGAG  
AAAAAATAAGTCTAATTTGGAAAGGTCATTGTGTATTTGCTTGTTGCCGTGTATGCTGC  
ACAGCAACAGCAACGTATGAGTTTAATGAATTTTATGAGAGTACTGTTGAAGGCAGAGAA  
ATAGAGAGTGTAACAGGCAAATCTATTTTTGATGTTGATGTCAGGTGCTATACCTGCATG  
AAATTTTTAGATTCAATTGAAAAGCTTCGCATCTTTATAACTGCTACAGAAATTTGCTCTT  
AGAACCTTCCAGAACCTGTTATTTGAACAACCTGCAGCTGTTGTGTCTTGAGTGCCGTGGG  
AACTGCAAAACATGGCGGATCCTAAAGGTAGTACATCTAAAGACGGGTTGGATGATTGGTG  
TATTGTGGAAGCTGAATGTAGCGATATAGAAAATGATTTGGAAGAATTATTTGACAGAGA  
TACAGACTCAGATATTTTCAAGATTATTAGATGATAATGATGACTTGGACCAGGGAAATTC  
TCGGGAACCTATTTTATCAACAAGAGAGTAAGGAAAGCGAGGAGCACTTGCAAAAACATAA  
ACGAAAGTACTTGAGTCCTCAAGCTATCGCACAGCTTAGTCCGCGACTTGAAAGTATAAC  
ATTGTCACCTCAGCAGAAGTCTAAACGAAGGCTCTTTGCAGAGCAGGACAGCGGGTTGGA  
GTTAACTCTTACAAATGAAGCTGAAGATGTTTCTTCTGAGGTGGAGGTACCGGCTCTAGA  
CTCTCAGCCGGTTGCTGAGGCACAAATAGGAACAGTAGACATTTCATTATACAGAATTATT  
ACGTGCCAGCAACAATAAGGCAATTCTTATGGCAAAATTTAAGGAGGCTTTTGGGGTAGG  
CTTTAATGATTTGACACGTCAGTTTAAAAGTTACAAAACCTGCTGTAATCATTTGGGTTCT  
GTCTGTATATGCAGTGATGATGATCTTCTTGAAAGCTCAAAGAAGTTATTGCAACAGCA  
TTGTGATTATGTATGGATACGTGGGATAGCTGCTATGTCATTATTTTTATTGTGTTTCAA  
AGTGGGAAAAAATCGTGGGACAGTACATAAATTAATGACCTCAATGTTAAATGTGCATGA  
AAAGCAAATATTGTCTGAGCCTCCAAAGCTACGAAATGTTGCTGCTGCATTGTTCTGGTA  
TAAAGGTGCAATGGGGTCAGGGACATTTACTTATGGTCCCTACCCTGATTGGATGGCACA  
TCAAACTATTGTTGGCCATCAAAGTACAGAAGCAAATGCATTTGATATGTCTGTTATGGT  
GCAGTGGGCATTTGATAACAATTATTTAGATGAAGCTGATATAGCCTATCAATATGCTAA  
GTTAGCACCCAGAAGATAGTAATGCTGTGGCCTGGCTTGCCCATATAAATCAGGCCAGGTT

TGTTAGAGAATGTGCATCTATGGTTAGATTTTATAAAAAAGGTCAAATGAAAGAAATGTC  
TATGTCAGAATGGATACATACTAGAATAACTGAAGTAGAAGGAGAAGGTCATTGGTCAAC  
AATAGCAAAATTTCTTAGATATCAACAAGTAAACTTTATAATGTTTTTAGCTGCTTTGAA  
AGATATGCTACATTTCAGTTCCCAAACGTAATTGTATATTAATATATGGTCCTCCAAATAC  
TGGGAAGTCAGCATTTTACCATGTCTTTAATTCGTGTGTTAAGAGGAAGGGTGCTTTTCATT  
TGTTAATTCTAAAAGCCAATTTTGGCTGCAACCAATGTCAGAGTGTAAGTAGCTTTAAT  
TGATGATGTCACAGATCCATGTTGGTTGTATATGGACACTTATTTGAGGAATGGCCTTGA  
TGGTCATTATGTTTCTTTAGATTGCAAAACATAAAGCACCGATACAAACTAAATTTTCCTGC  
ACTATTACTTACATCTAATATTAATGTACACAATGAAATAACGTATAGATATTTGCATAG  
TAGAATTAAGGGATTTGAATTTCCAAATCCATTTCCAATGAAAGCAGACAATACACCTGA  
ATTTGAACTCACTGACCAAAGCTGGAAATCTTTCTTTACAAGGCTTTGGAATCAATTAGA  
GCTGAGTGACCAAGAAGACGAGGGAGACAATGGAGAATCTCAGCGACCGTTTCAATGCTC  
TGCAAGATCAGCTAATGAACATTTATGAGACTGCAGCAAACACACTTGAGTCGCAAATTG  
AGCATTGGCAAACCTCTCGAAAAGAAGCTGTGCTACTATATTTTGCTAGGCAAAATGGTG  
TGACACGACTTGGATACCAAGTTGTGCCTACATTAGCCATTTCAGAAGCAAAAGCCAAGC  
AGGCCATAGGGATGGTGCTGCAGTTGCAATCACTGCAAAAGTCTCAGTTTGGCAGTGAAC  
CATGGTCACTGGTTGATACCAAGTGGAGAAACATTTAGAAGTGCTCCAGAAAATCATTTC  
AAAAGGGTCCAGTATCAGTAGAGGTGATTTATGATAACGATAAAGACAATGCAAATGCTT  
ATACATGTGTGAAGCACATATATTACCAGGATGATGACGAACAGTGGCATAAAAGTGCAA  
GCGGGGTCAACCACACAGGCATATATTATATGCAAGGAACCTTTAGAAACTACTATGTTT  
TGTTTTGCTGATGCAACTAGATATATGATAAACTGGACATTGGGAAGTTAAAGTTAATA  
AGGAAACTGTGTTTACTCCTGTCAACAGCTCCACCCCTCCCGAGTCACCAGGAGGACAAG  
CAGACTCAAACACCTCCTCCAAGACCCCCACCACCGCCACTGACTCCACGTCCAGACTCT  
CGCCCCGAGATTCAGAAAAACAGTCACAACAAGCCAACACCAAAGGAAGAAGGTACGGAC  
GCAGACCGTCCAGTAGGACCCGCGCAACGACCGAAACGCGGCAGAGGCGGAGATCGAGGT  
CCAAGTCCAGGTCGCGGTGCGAGGTGCGGGTCTCGGCTCCGATCTAGATCCCGGTGCGAAT  
CGTCTGAGCGGCGGTCTCGGTACCGATCAAGATCCAGATCCAGACAAAAAGAAGTGTTCA  
GAATCACAACCACCACCAGAGGGAGAGGTGCGAGGTGTCCTCCACCTCCTCCAAACGGT  
CACAACGGGCACGAGGAAGGGGCCGTGGGGGGAGCAGGGGGAGACGGTCATCCTCCACCT  
CCCCACCTCCTCCAAACGGTCACGACGAGAGTCAGAGTCTTCTAGGCAGCGTGGCATCT  
CTCCTAGTGACGTGGGAAAGTCACTTCAATCAGTTAGTTCAAGAAATACAGGAAGACTTG  
GAAGGTTACTGGACGAAGCTCTCGATCCCCAGTAATCTTAGTCAGGGGGGACCCTAACA  
CGCTACGATGCTTTTCGCAATAGAGCTAAGCAAAAGTTTACAGGGCTTTACAGGGCCTTTA  
GCACGGCTTGGTCGTGGGTGGCTGGAGATGGCACTGAGCGTCTAGGCAGGTCCAGAATGC  
TCATTAGCTTTTTCTCCTTTAACAGAGAAGAGATTTTGATCAGACTGTTAAGTACCCGA  
AAGGAGTGGACCGGTGCTTTGGCTCATTGATAGCCTATAACACCCCTAACATACTAACA  
TAATAGCTTGCTACTAACATCTAATATTTATGATTTTTGCTTTTTGTTTGCATTATTT  
TAATGCTATGGCGCGTGCTAGGCGAGTCAAGCGTGACTCTGCTACTAACATTTACAGAAC  
CTGCAAGCAAGCAGGCACGTGTCTCCTGATGTCATTAATAAAGTTGAAAGCACAACTAT  
TGCTGATAAAATTTTGAGTATGGTAGTGCTGGTGTTTTTTTTTGGGGGTTTGGGCATAAG  
CACTGGAAAAGGTACAGGAGGTACCACAGGCTATGTGCCTTTGGGAGAGGGCCCAGCAGT  
ACGTGTTGGTGGTGCGCCAACAATTATCAGACCTGCTCTGGTCCCAGACACCATTGGTCC  
ATCAGATATTATACCTGTGGACACCTTAGATCCAGTGGAGCCTACGACCTCTTCTATTGT  
TCCACTCACGGATTCACAGGACCAGACCTTTTGCCTGGCGAGGTGGAACTATTGCAGA  
GGTGCATCCTGGCCCGTCTAGGCCTCCTACTGACACTCCTGTCAAACTAGTACAGGAGG  
CTCCAGTGCTATATTAGAAGTAGCACCGGAACCTACTCCGCCCTCACGTGTTAGGGTGAC  
CCGACACAATATCATAATCCCTCCTTTCAAGTAATTACCGAATCCACCCCTACCACAGG  
TGAAAGTTCAATTAGCAGACAATATATTGGTTACCTCTGGTTCTGGGGGACAACTATTGG  
AGGCGCTACACCTGAACCTTAGAAGTCAAGAGTTACCATCTAGATATTCAATTTGAAAT  
CGAAGAACCAACACCCCTTAGAAGAACTAGTACCCATTACAAAGGATACAGACAGCTAT  
AAGAAGGAGGGGTGGGCTTACAAATAGGCGCTTAGTCCAACAAGTTTCTGTAGAAAACCC  
CTTATTTTTTAACAAGACCATCTAGACTAGTGCAATTTTCAGTTTGATAATCCAGCATTTGA  
GGAGGAAGTAACACAAATATTTGAACAAGATATTGAAGATTTTAATGAGCCTCCAGACAG  
AGATTTTCTAGATGTTCAAAGGCTGGGTAGGCCCAATATTACAGAACTCCAGCAGGGTA  
TCTCCGAGTTAGTCGTCTTGGGCAAAGGCGGACTATACGCACTCGTTCTGGAGCACAAAT

TGGGTCTCAAGTTCATTTTTATAGAGATCTAAGTAGTATAAACACAGAAGATCCTATTGA  
GCTTCAATTATTAGGTCAGCATTCTGGGGATGCTACTATTGTCCAAGGTCCAGTTGAAAG  
CACATTTGTAGACATAAATGTAGATGAAAAATCCACTTTCTGAGGATTTTAGTGCACATTC  
TGATGACTTGCTTTTAGATGAAGCTAATGAAGACTTTAGTGGCTCTCAATTAGTTGTGGG  
TAATCGACGCTCAACATCTTCATATACCGTCCCTCGTTTTGAAACAACCAGATCTGGGTC  
ATATTATGCACAGGATACAAAAGGTTATTATGTAGCTTATCCTGAGGATAGGGACATTAG  
CATGGATATTATTTATCCTACCCCAGAGTTGCCTGTTGTCATTATTCACACATATGATAC  
AAGTGGTGATTTTTACCTGCATCCTAGTCTTCACAAAAGACTCAAAAAGAAAACGAAAATA  
TTTGTAACCTTTTTCTTTTACAGATGGCAGTTTGGCAAGCAGCTAGTGGTAAGGTTTACCT  
TCCACCATCTACACCAGTTGCCAGGGTCCAAAGTACGGACGAATATGTGCAAAGGACTAA  
CATCTATTATCATGCATACAGTGACAGATTATTAACCTGTTGGTCATCCATATTTCAATAT  
ATATGACGTGCAAAGTGCTAAGATAAAAGTACCAAAGTATCTGGAAATCAACATAGGGT  
TTTCAGACTAAAGTTGCCAGACCCTAATCGATTTGCATTAGCTGACATGTCTGTTTATAA  
TCCAGATAAAAGAAAGACTGGTTTGGGCATGCAGAGGTATAGAAATAGGCAGAGGACAACC  
TTTAGGTGTAGGTAGTGTAGGACATCCATTATTTAATAAGGTTGGTGATACAGAAAATCC  
CAACTCATACAGGCAACAAGCTAACTCCACTGATGACAGACAAAATGTGTCATTTGATCC  
TAAGCAACTGCAAATGTTTATAATAGGCTGTGCACCTTGCATGGGGGAACATTGGGATAG  
GGCCTTGCCATGTGTAGAAGATAAACCACCCCTGGTTCTTGCCCTCCAATTGAATTAAA  
AAATACAGTGATTGAAGATGGTGACATGGCAGATATAGGCTATGGAAATTTAAATTTTAA  
GGCATACAGAATAATAGATCTGATGTAGTTTGGATATAGTTAATGAAATTTGCAAATA  
TCCAGACTTTCTGAAAATGCAAAATGATGTATATGGAGATTCCCTGCTTTTTTTATGCACG  
CAGGGAACAATGTTATGCCAGACACTTTTTTGTAGAGGGGGTAAGACAGGAGATGACAT  
ACCAGCAGCACAAAGTTGATGAGGGTAGCCTAAAGAATGTTTATTACATTCCACCAATGAC  
AAATCAACCACAAAACAATATTGGCAATGCCATGTATTTCCCAACTGTCAGTGGCTCATT  
GGTATCCAGTGATGCTCAACTGTTCAATAGACCATTTTGGTTACAGCGCGCACAAAGGCCA  
CAATAATGGTATTTGTTGGTTTAAATCAGTTATTTGTTACTGTTGTGGACAACACACGTAA  
CACAAATTTTAGTATATCAGTTAGTTCAGAAAACACTGAGGTATCCAAAATTGACAATTA  
TACCTCTCAGAAATTTCAAGAATATTTAAGACATGTAGAAGAATATGAAATGTCTCTAAT  
TTTACAACATATGTAAAATACCTTTAACAGCTGAAGTCTTAGCTCAAATTAATGCAATGAA  
TTCTAATATTTTAGAGGAGTGGCAATTAGGATTTGTACCTGCACCAGACAATCCTATTCA  
TGATACATACAGATATATTGAGTCTGCAGCGACTAGGTGTCCTGATAAAAAATCCTCCTAA  
AGAAAGAGAAGATCCTTATAAAAACTTTAACTTTTGGAAATGTAGATTTAACAGAGAGACT  
ATCTTTAGACCTAGATCAATATTCTCTTGGGAGAAAATTTTTATTTTCAGGCAGGTTTGCA  
GCAATCGACCGTTAACGGTACAAAAACAGTTTCGACTAGGGGATCCATCAAGGGTATTAA  
ACGAAAACGCAAGAATTAGACATTATCGATTTCCGGTGCAATAAAGTCAACTTTTACACAG  
TATTCAAGGAATGTTTATTCACTCTGACTAAGCAAATATGAGCCGCGCCCGATACATAAA  
GGTGCCAAATGAGGTGAGTTGTTTGCCAGAAGAGGTGAGAGCCAACTCAGGTTTGCGCCA  
GATCAGATACAGCGCGAGCCGCGTTGGATCAAGCTACATCGTCTGAACACGCAAAAGACT  
CAAGGAAATGTAAGTGTGCCAGTCTATTGTGTTTGAATTTGGCAAAAGTTGAAGACCGTT  
>gi|396910|emb|x74466.1|\_Human\_papillomavirus\_type\_12\_genomic\_DNA  
TTGTACCAGGTGCGGTACGATTTCCCAATAGCACATTATACTAGATTGTTGTTGCCAACT  
ACCATCATCAGTTTCAAGTTTTTGCCTGTATCGTTTTTCGTATCATACTAATTCGTATAT  
AATTAAATAAATAAATAAATATATATATATATATAATGTATAAGGCTTGTTCTTT  
TGCAATGTGATTGGGACAAATGGCACAGCAGGCCGATCAGCAGACAGTGACAGACAGTAC  
GCCTGAGCTGCCCACAACATATTAAGAGTTAGCTGACCTTTTAGATATACCTTTAGTTGA  
CTGTTTGGTACCTTGCAATTTTTGCGGAAAGTTCTTAGATTTTCTGGAAGTGTGTGATTT  
TGACAAAAAGCAGCTAACACTAATTTGGAAGGTCATTTTGTACTGCTTGCTGTGCAAG  
TTGTTGCGCAGCTACTGCAATATATGAATTTAATGAATTTTATCAACAAACAGTGCTAGG  
TAGAGATATAGAGCTTGCTACTGGAAAATCTATATTTGACTTAAAGATAAGGTGTCAGAC  
GTGCTTTGTCAATTTTAGATACAATTTGAAAAGTTAGACAGCTGTGGTCGGGGCCTTCCGTT  
CCACAAGGTTAGAGACAGGTGGAAGGGAATTTGCAGACAGTGCAAGCATTGTATCTGAA  
TAATGATCGGTAAAGAGGTACCCGTGCAAGATTTTACCTTGGAGCTTAGTGAGCTGCAGC  
CTGAAGTGTTACCAGTTGACCTGCTTTGTGAAGAGGAATTACCAAACGAGCAGGAAACGG  
AGGAGGAGTCAGATATCGACAGGACTGTATTCAAATCATTCACCGTGTGGCTGCAGCT  
CCTGTGAGGTCAACCTTCGTATTTTTGTCAACGCAACTGATACTGGCATTAGGACCCTAC



AGGACCTGCTGATCAGTGACCTGCAGCTGCTGTGCCAGAGTGCCGTGGTAACTGCAAAC  
ATGGCGGATTCTAAAGGTAGTACCTCTAAAGAAGGGTTAAGTGATTGGTGTATTTTGGAA  
GCAGAATGTAGTGATTTAGAGAATGATTTTGAACAGTTATTTGAGCAAGATACAGACTCC  
GATGTATCGGACTTGCTAGATAATGGTGAACCTTGAACAGGGGAATTCTCTGGAACATTTT  
CATCAACAAGAGTGTGAGCAAAGCGAGGAGCAATTACAAATTCTAAAACGAAAGTATCTT  
AGTCCAAAAGCTGTCGCGCAGCTTAGTCCGCGTCTCGAGTCGATATCGTTGTCACCTCAG  
CAGAAATCGAAACGAAGGCTCTTTGCAGAGCAGGACAGCGGACTCGAGCTATCTCTAAAC  
AATGAAGCTGAAGATGTTTCTCCTGAGGTGGAGGTACCGGCTATAGACTCTCGGCCGGTA  
GATGAGGGAGGATCAGGGGCCATAGATATTGATTATCTGTCATTGCTGCGTAGTAGCAAT  
ATTAAGCCACGTTAATGGCAAAATTCAAAAGAGTCATTTGGGGTAGGCTTTAATGAATTG  
ACTCGCCAGTTTAAAAGTTACAAAACCTGTTGTAACGATTGGGTTTTAGCTGTGTATGCA  
GTTTCATGATGATCTATTTGAAAGCTCAAAGCAGCTGTTGCAACAGCATTGTGACTATATC  
TGGGTCCGTGGGATAGGAGCTATGACACTTTACCTATTGTGTTTTCAAAGCGGAAAAAAT  
CGCGGTACTGTGCATAAGTTAATGACATCAATGCTAAATGTGCAAGAACAGCAGATTTTG  
TCTGAGCCTCCTAAGTTAAGAAATACAGCTGCTGCATTGTTCTGGTACAAAGGTGGTATG  
GGGTCAGGCGCATTTACCCATGGCACATATCCTGATTGGATTGCACATCAAACAATTTTG  
GGCCATCAAATGCTGAAGCAAGCACATTTGATTTTTTCAGCCATGGTCCAATGGGCCTTC  
GATAATAATTACTTAGAAGAACCAGATATAGCTTATCAATATGCCAAGCTTGCACCAGAA  
GATAGCAATGTCAGTAGCTAGGCATGACATCAACAAGCTAAATTTGTAAGAGAGTGT  
GCAGCAATGTCAGGTTTTTATAAAAAAGGACAAATGAAAGAAATGAGTATGTCAGAGTGG  
ATACACACAAAAATTAATGAAGTAGAAGGTGAAGGGCATTGGTCAGATATAGTAAAATTT  
TTAAGATATCAAGATGTAACTTTATTACCTTTTTTGGCAGCATTTAAAAACTTTTTGCAT  
GCTGTACCAAAACACAATTGTATTCTTATATATGGGCCCTAACTCTGGAAAGTCATCA  
TTTTGCAATGTCACCTGATAAAAGTTTTTAAAAGGTAGAGTGTTGTCATTTGTGAATTCCAAA  
AGTCAATTTTGGTTACAACCTCTTGGAGAAAAGTAAAATTGCATTGTTGGATGATGTTACA  
GACCTTGCTGGGTATATATAGACACATATTTAAGAAATGGCTTAGACGGCCATTTTGTT  
TCTTTAGATTGTAAATATAAAGCGCCCGTACAAATTAAGTTTCCTCCATTGTTACTCACA  
TCTAATATTAATGTTTCATGGAGAAACAAATTATAGATATTTACATAGTAGGATAAAGGGA  
TTTGAATTTCCACATCCCTTTTCTATGAAACCAGACAATACACCTCAGTTTCAGTTAACT  
GACCAAAGCTGGAAATCTTTTTTTTGAAGGCTTTGGACACAATTAGACCTGAGTGACCAA  
GAAGAGGAGGGCCAACATGGAGAATCTCAGCGAGCGTTTCAATGTTCTGCAAGATCAGCT  
AATGAACATATATGAAGCTGCAGAACATACACTTGAGACACAGATTGCCCATTTGGACACT  
TTTGCGAAGAGAAGCTGTTTTTGCTTTATTATGCTAGGCCAAAAGGGTATTACAAGGCTTGG  
ATACCAACCGGTGCCTACATTGGCAGTTTCTGAAGCAAAGCAAAGAGGCTATAGGGAT  
AATGCTGCAATTGCAATCTCTACAGAAGTCTGAGTATGCTTCGGAGAAGTGGACATTAGT  
GGACACAAGTGCAGAAACGTATAACAATGTTCCAGAACATCACTTTAAAAAGGGTCCAGT  
GCCTGTGGAGGTCAATTTATGATAAGGAGCCAGAAAATGCAAATGTGTATACAATGTGGAA  
GTATGTGTATTATATGGACCCAGAGGATGTATGGCATAAAACCACAAGTGGTGTAATCA  
GACGGGCATTTACTATTTACATGGAGACTTTAAACACTATTATGTACTTTTTTGCTGATGG  
TGCACGAATGTATAGTAAACTGGACAATGGGAAGTTAAGGTAAATAAGGAACTGTGTT  
TGCTCCTGTCAACAGCTCCACACCACCCGGGTCACCAGGACAAAGAGACCCAGACGCCAC  
CAGCAAGACCCCCGCCACCTCCTCCGACTCCACGACCAGATCCAGTGACAAACAGTCACA  
ACAAGCCGACCCAGGAGGAAAGGATACGGACGACGACCATCTAGCAGAAACAAGGCGACA  
GGAAACGCAGCAAAGGCGATCAAGGTCGCGATACCGCTCCAGTCTAACTCCCGGTCGCG  
CTCCAGTCCCAAACCAGGGCCCTTGGCGCCACCTCCGTATCCAGGTCTCCAGGTCCCC  
GTCGGTCACACAGATTAGGAACCGGAGGTGCGGATCGCAATCCAGAGGAAGGGGGGTGCG  
AGGGTCATCCACCGACACCACTAAGCGGCGGAGATCCAGATCATCTCCTCCAACAC  
CAGAAAACGGTCACAACGGGGAGAAAGAGGACGGGGAGAAAGGGGCGGTAGGGGGAAGCG  
ACGAGACCGGATCATCTCCACCTCCCCACCCCAAACGATCCCGAGCAGGGTCTAGGTC  
TAGCAGGCAACGTGGCGTGTCTCCTGAGCAAGTGGGAAGATCTCTTCAATCTGTTAGTTC  
AAAACATAGAGGACGACTTGGGAGATTATTGGAAGAAGCTCTCGACCCCCAGTGATCAT  
TTGCAAAAGGGGGGCAACACGCTAAAAATGCTTTGCAACAGAGCTAGACACAAATATAC  
AGGGCTGTTTAAAGGCTTTTAGCACAAACATGGTTCATGGGTGGCTGGAGATAGCACTGAGCG  
TCTAGGCAGGCCCAGAATGCTCATTAGCTTTACTTCAACTAATCAGAGAAAGGATTTTGA  
TGAGACTGTGAAATATCCGAAGGGAGTTGAAACTGCATATGGCAACTTAGACAGCCTATA

ACATAACTAACTTTGCTTTGCTACTAACCACACTAACAATTTTTTTTACATTTATTTTTTAC  
GTTTTTATTATTGCTATGGCGCGTGCTAAGCGGGTCAAGCGAGACTCTGTTACTCATATA  
TATCAAACCTGCAAACAAGCAGGCACTTGCCCCCTGATGTTCTCAATAAAGTGGAGCAA  
ACAACAGTTGCTGACAATATTTTGAAATATGGTAGTGGTGGTGTCTTTTTTGGAGGCCTC  
GGTATTGGTACCGGTGCGGGTACTGGAGGTGTCACTGGATACAGACCTCTACCTGAAGGG  
CCCGGTATCCGTGTTGGAGGGACTCCACGGTTGTAAGGCCTTCACCTGTTCTGAATCT  
GTGGGTCCAGCAGATATATTACCAATAGACACTATCGATCCTGTGGAGCCCACTGCTTCC  
TCGGTAGTTCCATTAACTGAATCCTCAGCAACTGATCTACTTCCAGGAGAAGTTGAGACA  
ATAGCTGAGATTAATCCTGTTTTAGAGGGGCCCTACGATTGATTCACCTGTTGTGACAACA  
AGCAGAGGCTCCAGTGCAATATTGGAAGTTGCACCAGACCCTATACCTCCAACACGTGTT  
AGAGTGGCACGCACACAGTACCATAATCCTGCTTTTCAAATTATAACAGAGTCCACACCT  
GCTCAAGGTGAAACATCTTTGGCAGACCACATCCTGGTCACATCTGGCTCAGGAGGTCAA  
ACTATAGGTAGTGACATAACAGACATTATTGAATTACAGGAAATACCCAGTAGATACTCC  
TTTGAAATAGAAGAGCCAACCCCCCCCCGGCAAAGCAGCACTCCACTTCAGAGGACACAA  
ACCACTGGCCGACGTAGAGGAGTGTCCCTAACAAATAGAAGGCTAGTACAACAAGTGCAA  
GTTGATAATCCTTTATTTATAGATAAACCTTCTAAGTTAGTACGCTTTTCATTTGATAAC  
CCTGTATTTGAGGAGGATATAACAAATATTTTGAACAGGACTTAGAAACATTTGAGGAG  
CCACCTGATAGGGATTTCTTTGATATTAAGCTAAGTCGACCTCAATACTCTACAACA  
CCTGCTGGATATGTTAGGGTCAGTAGGCTAGGCACGCGGGGTACCATTTCGCACACGTTCC  
GGAGCTCAAATAGGATCAGAGTTTCATTTTATAGAGACTTAAGTTCTATTGATTTCAGAA  
GACCTTATTGAGCTACAATTATTAGGCCAACATTTCAGGTGATGCAACCATAGTGCAAGGC  
ACTGTTGAAAGTACATTTGTAGATATGGACATAGCGGAAGATCCTTTGTCTGAAAGTATT  
GAGGCTCATTTCTGATGACCTATTACTTGATGAAGCTGTGGAGGATTTTAGCGGGTCACAA  
TTAGTTATTGGAACAGACGCAGCACAAACATCATACACTGTGCCCCGTTTTGAAACTACA  
AGGAGCAGTTCTTATTATGTGCAAGATACACAAGGTTATTATGTGGCTTATCCTGAACAT  
AGAAATACTGCAGAAATCATTTATCCAACACCAGATATACCTGTGGTAGTTATACATACA  
CATGATAATAGTGGTGACTTTTTATTTACATCCTAGCCTGCGGAGGCGCAAGCGTAAAAGA  
AAATATTTGTGATTTACTTGCAGATGGCTGTGTGGCAAGCGGCCCATGGTAAGGTCTATC  
TACCACCATCAACACCAGTGGCCAGGGTGCAAAGCACGGATGAATACATTCAAAGGACTA  
ACATCTACTATCACGCCAATACTGACAGACTACTCACTGTAGGACATCCATATTTCAATG  
TTTATGATAACACTGGTAAAAAATTGGAGGTTCTTAAAGTGTGAGGAAATCAACACAGAG  
TATTTTCGCCCTCAAATTGCCAGATCCAAACAGATTTGCTTTAGCTGACATGTCTGTATATA  
ATCCTGATAGGGAAAGGTTGGTCTGGGCCTGCAGAGGATTGGAAATAAGTAGGGGTCAGC  
CTTTAGGCGTTGGAAGTACTGGACATCCCTATTTTAACAAAATTAAAGACACGGAAAAC  
CAAATAACTATGCCACAGGCAGTAAGGATGATAGACAGAACACATCATTTGATCCTAAAC  
AAATCCAAATGTTTATAGTGGGCTGTACACCTTGTGTGGGAGAACACTGGGAGAAAGCCT  
TACCCTGCGGGGATGCACCAGCTGAAAATGGTGTGTTGCCCTCCCATAGAGTTAAAGAACA  
CTTTCATTGAAGATGGTGACATGGCAGATATTGGTTTTGGCAACATGAATTTTAAAACAT  
TGCAACAAAAACAGATCTGATGTGACCTTGACATAGTGAATGAAACTTGCAAATATCCAG  
ATTTTTTTGAAAATGCAAAACGATGTATATGGAGATGCTTGCTTTTTTTATGCTCGTAGAG  
AGCAGTGTTATGCCAGACATTTCTTTGTGAGAGGAGGTAAAACAGGTGATGACATTCCTG  
ACGCACAAATTGATGATGGCAATATGAAAAATCAGTATTACATTCCTGGAGCTCAGGATC  
AATCTCAAAAGGATATAGGTAATGCGATGTATTTCCCAACTGTAAGTGGCTCATTTAGTTT  
CTAGTGATGCTCAGTTGTTTAATAGGCCCTTCTGGCTTCAAAGAGCACAGGGTCATAATA  
ATGGCATCCTGTGGGCTAATCAGATGTTTGTACAGTTGTAGACAATACACGAAACACCA  
ATTTTCAGTATATCTATTTACAGTGATAATCAAAATGTACACGACATTCCAAATTATGATT  
CTCAAAAATTTAGAGAATATTTAAGACATGTAGAGGAATATGAAATTTCTCTTATTTTAC  
AATTATGTAAAGTTCCCTTTAAAGGCAGAAGTGTAGCACAGATAAATGCAATGAACCTCTT  
CTTTGCTGGAGGACTGGCAATTAGGCTTCGTGCCAACTCCTGACAATCCTATTTCATGACA  
CATACAGATATATCGAATCTCTGGCTACTAGTGGCTGATAAAAAATCCTCCAAAAGAAA  
AGCCGGACCCCTATGATGGCTTAAGTTTTTGGACTGTAGATATGACTGAGAGACTTTCTT  
TAGACCTGGATCAGTATTCCTTAGGGCGCAAGTTCTTATTCCAGGCTGGCTCCAAACAAA  
CGACCGTTAACGGTACAACAAAATCATCAAGCTATAGAAGTTCCATAAGGGGGACCAAAA  
GAAAACGCAAAAACATAATGTACCGAATTTGGTACAATTACCTCAACTTTTGCACAGTAT  
TCAAGGAATGTTTGTTTACTCTGACTAAGTCTAACTCTACCAAGGAAACAGACCGCGCCC

GGTACATAAAGGTGAGTTGGTGCCAAATTAGTCTCACTTTGTTGCCAGAACATACCGTGT  
TCGTCCCTAACATGCTCGGATTAGGTGACCGCCAAAGGACCTTTGGTTTGCCAAATAGCT  
TACAGCAGCTCAGTTCTGGCACATTTGTGGACCGATAACGGTAAGTCTCATTC  
>gi|312100|emb|X70829.1|\_HumanPapillomavirus\_type\_65\_complete\_genome  
ATTATTAATGATAGTTGGCAACAACCATCATCTAAAGTAATATATAACCGGAAGAGATAC  
ATATAAAAAGACACATTGTATTCTTGATAAAATCCCATCCAGATGGCAGATGGCAGACCTG  
CAGCTTTGGACGACTTCTGCAGACGATTTGATATTTCTTTTTTTGATTTGCATCTTACTT  
GTATTTTTTTGTTCTCATACTGTTGATCTGCAAGATCTTGCTTCGTTTTATCTTAAGAAGC  
TTAGTTTATGTTTTCAGGGGGGGTTGCTACTATGCATGCTGTTCTGAATGCTTACGTTTAA  
GTGCAAGATTTGAGCAAGAGAATTATTTTCAGTGTTCTATAAAAGCTGTTAATTTGGAAG  
AAGTAGCTCAAAGGAAAATTAAGGAGATTTGCATCAGATGTATATGTTGTTGAGACTAC  
TAGACATTGTTGAGAAATTAGACTTGCTGTACTCTGACCAGGCCTGCTACTTAATAAGGG  
GTTTGTGGAGGGGCTATTGCAGAAATTGCATTAGGAAACAATGAGAGGAGCAGCACCCAG  
GGTTGCAGATCTTAATTTAGAATTAATGACTTGGTGTGCTTATAAACCTGCTGAGTGA  
GGAGGTCTTGCAACCTTCAGATGATGAGTCTGAGGCTCCAGAGGAGGAGCTTTTTCTTTT  
TAGAATAGACACCTGTTGCTATAGATGTGAAGTTAATGTAAGGATTACTCTGTTTGCTGT  
GGAATTTGGACTTCGAGCGTTGGAACAACCTCATAGTGGACGGAAGCTGACGTTTTGCTG  
TACTACTTGTGCAAGAACCTTAAGAAATGGCAGATAAAGGTACAGAAAATTTTGACTTAG  
AAGGGAGTAGTTGGTATATTGTGCATGAAGCAGAATGCACAGACAGTATAGACACTTTGG  
AGGATTTGTGCGCAGAAAGCGATTCAAATGTTTCCAATTTAATTGATGACGATGTGGTTG  
ATCAGGGGAATTCCTGGCACTGTACAATGCAAAAATAACTGATGATTGTGATAATGCAA  
TAGCACACCTAAAACGAAAGTATAACAAAAGTCCAGAGCAGGCAGTTGCTGAATTGAGCC  
CTCAGTTGCAGGCTGTGAAAATTACTCCTGAAAGAAACAGCAAAAGGAGATTATTTTCAGG  
AGGACAGTGGGATATTTGAAGATGAAGCTGAAAATTCTCTTACACAGGTAGAATCTAACA  
GCCAGACTGGTGGCAACAGCCAAGATGGCGGAGGAGATATTAAGTTACTGTTGTTACAAA  
CTAGTAATAGGCGTGCTACAATGCTTGCAAAAATTTAAAGATTGGTATGGGGTTTCATATA  
ATGAAATAACTAGAGTTTATAAAAGTGATAAGTCTTGTAGTGATAATTGGGTTATAGTTA  
TCTTTTCGAGCTGCTGTTGAAGTTTTGGAAAGCTCTAAAATTGTTTTGCAACAGCACTGTA  
CATATATTCAAGTTAAATATTTGGATTTTCAGCTTTATATTTATTACAATTCAAAAGTG  
CGAAAAGCAGAGAAACGGTACAAAAGTTAATGTGTTCTATGTTGAATATTCAAGAGTTTC  
AAATATTGACTGACCCTCCTAAGTTACGAAGTGTGCCTACAGCTTTATACTTCTATAAGC  
AAGCCATGTTAACAGAGAGCTTTGTTTTCGGACAGACACCAGATTGGATTGCAAAGCAAA  
CCTTAGTAAGCCATCAAGCAGCAACTACTGCAGAAACATTTCGAATTATCAAAAATGGTTC  
AGTGGGCTTATGATAATAATCTGCTGGAAGAATGTGATATTGCGTATCATTATGCTATGT  
ATGCTGATGAAGATGCTAATGCTGCAGCCTATTTAAAGAGTAATAATCAAGTAAAACATG  
TTAGAGATTGCAGTACAATGGTTAGAATGTATAAAAGATATGAAATGAGGGATATGTCAA  
TGTCAGAATGGATTTATAAATGTTGTGATGAATGCACCGAAGAAGGTGATTGGAAACCTA  
TTTCTCAATTTTTTAAAATATCAAGGTGTCAATATTCCTTTCTTTTCTTATAGTTCTAAAGT  
CTTTTTTTAAAAGGTATTCCTAAGAAAAATTCATAGTCATTCATGGCCCACCAGATACTG  
GAAAATCTCTGTTTTGTTATTCTCTAGTGAAAATTTCTTAAAGGTAAAGTAGTATCCTATG  
TGAATCGAAGTAGCCACTTCTGGTTGCAGCCTTTAATGGATTGTAAGGTAGGATTTATGG  
ATGATGCAACCTATGTATGCTGGACATACATAGATCAGAATTTGAGGAATGCATTAGATG  
GAAATCCAATGTGTATAGATGCAAAACATAGAGCTCCACAGCAATTAAAATTACCTCCTA  
TGTTAATAACATCAAATATTGATGTGAAACAGGAACAATCATTAATGTATTTGCATAGTA  
GGGTCCAGTGTTTTAGTTTTCTTAATAAAATGCCTTTTTTTAGATGATGGTCTCCCATGT  
ATACATTTACTGACGCAACGTGGAAATCTTTTTTCCAAAAGCTTGGCAGACAATTAGAGC  
TAACAGATCCTGAAGAGGAAAGCAATGGAGTCCCTAGTCGCGCGTTTCGATGCACTTCAA  
GAGCAATCTGACTCATATTGAGTCTCAGGACGATACTTTGGAATCCCAAATTCGATAT  
TGGGAAAATATCAGAAAAGAAAATGCAATAATGCATTTTGCACGAAAACAAGGCCATAACA  
AAATTAGGTCTGCAACCCTTCCACATTAGCAGTAAGTGAATATAATGCAAAACAAGCA  
ATACAAATACATTTGACTTTGCAGTCATTATTAAGTCTCCTTATGGATCAGAGCGTTGG  
ACTCTGCCAGAAGTTAGTGCAGAACTGATTAATACTGCTCCACAGAACTGTCTAAAGAAA  
GGAGGTTATGATGTGTCTGTATGGTTTGATAATGATAGATATAATGCTATGGTGTATACA  
AATTGGGATTATCTATATTATCAAGATGTCAATGAAATATGGCATAAAAGTTAAAGGTGAA  
GTGGATTATGATGGCTTATACTTTACAGACCATACAGGAGAACGTGCATACTTTACTCTG

TTTAGCACAGATGCTCACAGATTTAGCAGAACTGGACTATGGACTGTGCATTTTAAAACA  
CAAGTTATTTTCCTCCTCTGTTGTCAGCTCAACAAACACCCCCCTCCTTCGACTTTGAGGAA  
CAACAACTACCCGGGCCCTCAACACCCACCTACACCGAGCTTACCCAGGCGAGCCCTTGT  
GGTAGGGGGAAATCGAGGGAATCTCAACCGACCTCCACAACGTCCCCGAAACCTCGGGG  
CTACGAGTACGACGAGGACGACGACAAAGAAAATCAGGGCCCGGGCCAGGAGAGACCCCC  
AGCAAAAGAAGAAGAGGAGGAGGGAGAGGAGGAGAGACCAGATTGGAGTCTGCGCCA  
TCTCCTGGGGAAAGTGGGAATCAGACATAGAACAGTTGAAAGACAAGGTCTGTCGCGACTT  
GGACAACTACAAGCTGAAGCTAGGGATCCACCCATGATATTGTTAAAGGGCACAGCAAAT  
TCGTTGAAATGTTGGAGATATAGGAAAACAAAATTCAGTAACTGTGGGTTTCTCTTTATG  
AGCACTGTTTGGAACTGGGTTGGTGATGTGTCAGAAAATCACAGTCGCATGTTAATTGCT  
TTTAAAGTCTCTGGTCAGAGAGACTCATTTGTAAACACAATCTATTCCCAAACCTCTGT  
ACATATACCTATGGTCTTTAAATAGCTTATAAAATGCAAGCCTCACGCAGAACAAAAG  
AGACTCAATACCAAACCTCTATGCAAAATGTCAATTATCTGGCAACTGTCTCCCGATGT  
AAAAAATAAAGTAGAAGCTGATACCCTTGCTGATCGTTTGCTCAGATGGTTGGGAAGTGT  
CATATACTTAGGAGGTTTGGGAATTGGGACGGGAAGAGGCAGTGGAGGGTCTCTGGTTA  
TAATCCACTGGGAGCCCCTAGCAGAGTAACACCTAGTGGAAGTGTATAAGACCAACAGT  
CCCTGTAGAAGGTCTGGGGCCTAGTGAAATCATCCCTGTAGATGTTGTAAACCCTGGCAG  
TTCTTCTGTGGTTCCTTTAGAGGATTTAACAGTTCAGAAAGTCACCATAGATAGCGGGGA  
GGTGGGAGGAGGTGGTCTTACCTCTCTGAGATAGATGTTGTCACCTCCTCAGACCCTAT  
TTCAGATGTCACCTGGTACAAGTAGCCACCCCTACAATAATATCTGGCGAAGATAACGCCAT  
TGCAGTCTAGATGTTTCTCCAACAGAGACCCCCCTACCAAACGCATAGCTTTAGGAACTAG  
GGGCGCAACATCAACACCACATATAAGTGTAATATCAGGCACGACCGAATTGGTTCAGTC  
TTCAGACCTAAATGTGTTTGTAAATGCCACATTTTCTGGAGATTCTATTGGATATACAGA  
AGAAATTCCTTTAGAAAGAGTTGAATACTATCCAGCAATTTGAAATAGAAAACCCCTCCAAA  
AACTAGCACACCACGTGAGACTATTGGACGTGCTTTGGAAAGAGCGCGAGATCTTTATAA  
CAGAAGAGTGCAGCAGATAGCCACTAGAAAATCCAGCAATGCTAGGACAGCCTTCCCGCGC  
AATAGTTTTTGGATTGAAAATCCCGCCTTTGACGCTGACATCAAGTATTTGAGCG  
GGACTTGGAACAGGTTGCAGCAGCTCCAGATGCTGATTTTGCTGATATAGTCAGAATAGG  
GCGTCCAAGATTTTCTCAGACAGACACTGGGCAAATTAGAATTAGCAGACTTGGGCGCCG  
AGGAACTATTAACACTAGAAGTGGTTTGCAAATTGGTCAGGCTGTGCATTTTATTATGA  
CTTGAGTACAATAGACACTGCTGATGCAATTGAGCTATCTACACTGGTCAGCATTCAGG  
AGAACAAAGCATTGTAGATGCAATGATAGAGAGCAGTTTCGTAGATCCCTTTGAAACTCC  
TGATCCTACATACAGAAGAGCAACAGCTTCTAGATCCCTTACAGAGGATTTTAGCAA  
CTCTCACTTGGTTTTAACTAGCAGTAGACGTGGATCTTCATTCACTATCCCCACTATTCC  
TCCTGGTTTTAGGCTTGAGAATTTATGTTGATGATGTAGGCTCCGATTTATTTGTATCTTA  
CCCAGAAACAAGAGTTATACCTGCGGGAGGCTTACCTACTGAGCCTTTTACCCCGTTAGA  
GCCTCCATTTTTTTTCAGAGTTTTACAGTTCTGACTTTGTATATCGTCCTAGTTTGTATCG  
CAAGAAACGAAAACGATCAGATATATTTTAAATTTTTTGCAGGAACATGGCGAGTTGGTTA  
TCTGCAAAGGGTAAAGTGACCTACCTCCCGCTCAACCTGTGGCAAGAGTTTGGAAACT  
GACGAATATATCACTGGAACATCTCTTTATTTCCACGCTGGAACAGAAAAGGCTTTTAACT  
GTAGGCCATCCTTATTTTCCAGTGAAAGATGTGCAGGATCAACACAAGGTTTTAGTTCCCT  
AAAGTTTCTGGAAAGTCAGTATAGAGTTTTTCAGATTCTATTTACCAGATCCTAATAGGTTT  
GCATTGATTGATAATGGTTTCTATGATTCTGACCATGAACGTCTTGTTTGGAGACTCAGA  
GGAATAGAAATAGGTAGGGTGGTCCCCCTGGGATTGGAACAACAGGCCATCCTTTATAT  
AATAAGTTTGGAGATTGAGAAAATCCTAATGGATACAGGAAACAATCAGATGACAACAGA  
CAGGATGTTTCTTTAGATCCAAAACAGACACAAATGTTTATCATAGGTTGCACTCCTGCT  
ATTGGGGAACATTGGGATAAGGCTGAGCCTTGTGCAAGTCCTGTTCTCAACCAGGAGAT  
TGTCTCTATAGAGCTTGTGAACACATATATTGAGGATGGGATATGTGTGATATTGGT  
TTTGAGAGCTTTTAAATTTTAAAGCTTTGCAGCAGGATAAATCTAGCGCTCCATTGGATGTA  
GTTGCTACAATGTGCAAATGGCCAGATTTTCTAAAAATGAGTAAAGATGTCTATGGAGAT  
AGCTTATTCTTTATGGTAGGCGAGAACAGTTATATGCCAGGCACTTTTTTGTAGAGCA  
GGAGCAATGGGAGATGCACTACCAGAACCTTTTCGAGGTTAAACTGATTACTGGATTCCCT  
GCTCAAGAAGGTCAGGATCAGAATACTTTAGGTCCACATATATATATAGGCACTCCTAGT  
GGATCTTTAGTTTCAAGTGAGTCCAGTTATTTAATCGACCGTATTGGTTAAACAGAGCT  
CAGGGTACAAATAATGGAATATGCTGGGATAATCAATTATTTGTGACACTTGTGACAAAT

ACTCATAATACTAATTTTACTATTTCTGTAAAAACAGAAGCAGCTGATGAATCCTATAAA  
TATAAAGCAGGTGATTTTAAACAGTATTTAAGACACATTGAGGAGTTTGAAATGGAATTT  
ATTTTTCAGCTTTGCACAGTTCCTCTTACAGCCGATGTCATGGCTCACTTAAATGTAATG  
AATCCTAATATCTTAGACAATTGGCAATTAAATTTTGTGCCCCCTCCTCCTTCAGGAATT  
GAGGATCAATATAGATTTATACAATCCAGAGCTACGAGATGTCCTACTCAGTCTCCAGT  
ACTGAAAAGGAAGACCCCTTATAAAGATTTATCATTTTTGGGGTGTAGATTTAACAGAAAGA  
TTTTCCAGTGAACTTAGCCAATTTTCTTAGGGAGACGCTTTTTATATCAAAGTGGTTTA  
ATTAATGGAACACTTAAAAGAAAACGTACTATTAATTCTCAAGCTCCAACCTAGTATTTAA  
CGTTCTGCCAAACGAAAACGGTCTATTAAACAGTAGATTAATCCTTATAAGAATGCATTT  
GTTCTGCCAATAGAACTTAAACTGAGCCAATTATTATATAATCTTTGGAAACGTGTATG  
TATTTGCTTTTTCTGTGAGAACTTGAGTAAAATAAACTGCCACATTCTTGCCACTGTCC  
ATATTGTCTGACTCATTGGTCAACATGTGTGTCCGCACCCAGTAATTACCTGGATCGCC  
TCCACATCCGTCGGATGCGCGCCAAAAGAGGAACGTCCCCTTCTATTTTTCTAAAAAATT  
ACCGTTTCTGCAGCTGCAAAATTGTGTAAGACCGTTATCGTTCCCTGTAAACCTTGGCACA  
AAAGGTGAGTGAAAGTTTTATAGTAACGTTTATGAGTCAATTTGTCTGGCGGCGCTGAAC  
GAATTTGGCTGTCAGCCTTTGCACCGGGAGTGGTAGAAAATAGTTTCT  
>gi|60882|emb|x55965.1|\_HumanPapillomavirus\_type\_57\_complete\_DNA  
TAATATATAACTATAATCCTTCATTCAAAAAATAGGGCGTAACCGAAAACGGTCAGACCG  
AAAACGGTTCGTATAAAAAACAGGAGCGCCATGTACAAGGGCAGGGAGTGTCTGAAGAAAATC  
CATGCCCCTAGGAACATCTTTCTGCTGTGCAGAGAGTATGGTTTGGAGCTAGAGGATTTGA  
GAATACTGTGCGTGTATTGCAAGCGGCCGTTATCAGACGCTGATGTGCTGGCATTTCAG  
TAAAGGAACGTGTTTGTAGTGTGGAGAAAGGATTCCCTTATGGAGCATGTGAAAAATGCT  
TAATTGCAGCAGCAAACTTAGACAATACAGGCACTGGCATTACTCATGCTACGGAGACA  
CAGTGAGACCGAGACAGGAATACCCATACCTCAGCTGTTTATGAGATGCTATATCTGCC  
ATAAGCCCCGTGTTGGGAGGAGAAGGAGGCATTACTGGTCGGCAACAAGCGGTTCCACA  
AGATATCAGGCCAGTGGACCGGACATTGCATGAACGTGTGCGCCAAGATGCATGGAGAACG  
CCCCAGCCTTGAGGACATCACACTAATATTGGAAGAAATACCGAAAATTGTTGACCTACA  
TTGCGACGAGCAATTTGACAACCTCAGAAGAAGATACTAACTATCAACTGACAGAACCAGC  
TGTGCAGGCCTACGGGGTGGTAACGACGTGCTGTAAGTGCCACAGTACAGTCCGGCTGGT  
GGTTGAGTGCGGAGCGGCGGACATAAGGCATCTGGAGCAGCTGTTCTGAATACGTTGAC  
CATAGTGTGCCCCCGCTGCGTATAGCGTCATGGAGGATTTCGGAAGGTACCGACGGGACCG  
ATGAGGACGGGTGCCGGGCAGGGGGGTGGTTCCATGTGGAAGCCATAATAACTCATGGCC  
AGAGTCAGGTATCCAGTGACGAGGATGAGGATGAAACAGAAACAAGGGAGGATTTAGACT  
TCATAGACAATAGGGTTCCCGGAGATGGGCAGGAAGTTCCCTTGCAGCTATATGCACAAC  
AAATCGCCCAGGATGACGAAGCAACAGTGCAGGCCCTAAAACGAAAGTTTGTGGCGAGTC  
CTTTGTCTGCATGCTCATGCATAGAGAATGATTTGAGTCCAGATTAGATGCAATCTCGC  
TAAACAGAAAGTCAGAAAAAGCGAAGAGACGCTTATTCGAGACAGAGCCACCAGACAGTG  
GGTATGGCAATACGCAGATGGTTGTTGGAACGCCAGAAGAGGTAACAGGGGAAGACAACA  
GTCAGGGGGGGCGGCCGCTGAGCGTTAGGGAGGAGGAGCGTCAAGGGGGGACGGAGAGG  
CAGATCTAACTGTACACACTCCACAGTCAGGAACAGACGCGCGGGTAGCGTGCTGACGT  
TACTGAAAAGTAGCAATCTGAAGGCGACGTTACTGAGTAAGTTCAAGGAGCTATACGGGG  
TGGGATATTACGAACTGGTCAGACAGTTCAGAGCAGCAGGACAGCATGCGCAGACTGGG  
TAGTATGTGCCCTTTCGTGTGTATTATGCAGTGGCAGAGGGTATAAAACAGCTGATACAGC  
CACACACGCAATATGCACACATACAGATACAAACAGTTTCTGGGGAATGGTGGTTTTCA  
TGTTGTTGCGCTACAACTGTGCAAAGAACAGGGACACCGTCTCCAAGAACATGAGCATGC  
TGTTAAACATTCCTCGAGAAGCATATGCTCATAGAACCACCAAACTAAGAAGTACACCTG  
CTGCCTTGTACTGGTACAAGACATCCATGGGTAATGGGAGTGAGGTCTATGGAGAGACAC  
CAGAATTGGATTGTGAGACAGACACTGATAGGACACAGTATGGAGGATGAGCAGTTCAAAT  
TATCTGTTATGGTGCAGTACGCATATGACCATGACATAACGGACGAGAGCGCAGTGGCAT  
TTGAGTACGCACAGCTGGCGGACGTGGACGCCAATGCGGCAGCATTCTTAAACAGCAATT  
GCCAGGCCAAATACCTAAAAGACGCGGTGACCAATGTGCAGACACTACAAGCGTGCAGAGA  
GGGAACAAAATGAGTATGAGCCAGTGGATCACATTAGAGGGAGTAAGATATCAGAGGAAG  
GAGATTGGAAGCCTATAGTGAAGTTTTTAAGGCATCAGGGGGTAGAGTTCGTGTCATTCC  
TTGCCGCTTTAAGTCATTTCTAAAAGGCGTGCCCAAGAAGAATTGCATAGTGTATATG  
GACCTGCAGATACAGGCAATCATATTTTTGCATGAGTCTTTTGCAGTTCCTAGGTGGCG

CTGTAATATCATATGCCAATTCCAGTAGCCACTTTTGGCTGCAGCCCTTAGCTGACAGTA  
AGATAGGGTTACTGGACGATGCGACGGCCCAGTGCTGGACGTATATTGATACATATCTTA  
GGAACCTACTAGATGGCAATCCCTTCAGCATAGACAGGAAACATAAGACCCTGCTGCAGA  
TAAATGTCTCCACTGATGATAACAACCAACATAAATCCTTTAGAGGAGGACAGGTGGA  
AGTATTTGCGCAGCAGAGTAACACTGTTTAAAGTTTACCAACCCATTTCCCTTCGCAAGTC  
CCGGGGAGCCCTTATACCCTATAAATAATGCAAACCTGGAAATGCTTTTTCCAAAGGTGCT  
GGTCCCGCCTAGACCTAAACAGTCCAGAGGATCAGGAAGACAATGGAAACACTGGCGAGC  
CGTTTAGATGCGTGCCAGGAGACGTTGCTAGAACTGTATGAAAAAGATAGCAACAACTT  
GAGGACCAAAATTAACATTGGGCGCAGGTCCGGCTAGAAAATGTAATGTTGTTTAAAGGCT  
CGGGAATGTGGAATGACACGAGTCCGGCTGTACAACAGTGCCCGCCCTCACCGTGTGAAA  
GCTAAGGCTTGTGAGGCCATAGAGGTTTACGCTGGCATTACAGACATTGATGCAGAGTGCA  
TATAGCACGGAGGCATGGACCCTGCGAGACACGTGCCTGGAGATGTGGGAAGCACCTCCA  
AAGAGATGCTGGAAAAAGAAAGGACAATCAGTATTAGTAAAGTTTGTATGGCAGCTGTGAC  
AGAGACATGATATACACGGGCTGGGGCCATATATATGTGCAGGACATTAACGATGATACC  
TGGCATAAGGTGCCCCGGGCAGGTGGACGAACTGGGACTATTTTATGTGCACGACGGCGTA  
CGTGTAATTTATGTGGACTTTTGAATAGAGGCCCTGACCTATGGGGTTACTGGGACGTGG  
GAGGTGCAGGTGCGGGGGCGTGTATTATTCATACATCCGCATCTGTGTCTAGTACCCAG  
GCCGCCACCTCGGACGACGACACACTATCCCCCTTTAGATCTGCTGCGGCCGAGTCACA  
GCCACAGCCACAGCCACAAGCAGTCCCCGCCACACTCCAGGACTCCGCCCAGGCGCCA  
TCGAGTCCCGCCACCCCAAGCGCCAGCGGGTCACTCGTGACAGCAGTGGCAACAGCCCGAC  
TCTACGCGGAAGGTGAGAGAAGGGCAGGTGGAGTGTCAAACGACAGGAGCATCCGTAAC  
CCTGACAGCAGACACCCCCGGCGGGGCCACAGTGACCTTGACGCTGTGCCTGTGATCCAC  
CTGCAAGGTGAAGCAAACCTGTTTAAAGTGCTTCAGATACAGGGTGCAAAAAACATAAAGAC  
GTACTGTTTTGTGAAGGCATCCTCCACCTGGCATTGGGCGTGTGGGAATGGTGACAAGACT  
GCCTTTGTAAACATTGTGGTACAAAAGTCAGGAACAGCGTGCAGAATTCCTTACAAGGGTC  
CATCTACCCAAAGGGGTGAAGGCACTGCCAGGGTATATGTCTGCATTTGTATAAATGTAT  
AGTCTGTAACATAATACACAGGTCCGCAACATTTACAGCCTGTATCATCAACACAGCCC  
TGGACTACTTTCTCTGCGTGGTGTGAGGGTGGTCCCATCTGCTGGTACTGTTGCTCTTCC  
TTTGGCTCTCTCAACTAACCCCTCTGGTAGCCTATCTGGTGTCTCTTCTGTGTCTATA  
TAGGGCTGTGGTTGATATTTTTTGCAGGCCTTGTGGTTTCTACAATAGTTGATATTACATT  
GTGACCAACTGCTGCTACCCTGTATATACCTCCCCCTGTATACTGCAATGTATCCTGCT  
GTGTACAAGGGCACGGGCGGGTTCGTATCCCATTGTCCTGTGGGGCCCTGATGATGTGGAT  
TGCTTGTTGATTATTCTTTTGTGATTGCCATTTTGTGTTGATGCTGTACGTCCGTCTG  
CTGCAGTAGTGTACATACTCATTGTGTTTTTGTCTACATACTCATTTTGATACATTTTTAT  
CGGTGTGCACCTGATTGCCTTTGTATTGCTACGTGTCAATAAACTTATTGCCATGTCACC  
ACGTGCAAAGCGTCGGAAGCGCGCCTCCCCACTGACTTGTATCGGACATGCAAGCAGGC  
TGGAACGTGCCCCCTGATATCATACCTAGGGTGGAACAGGACACATTAGCTGATAGGAT  
ACTCAAATGGGGCAGCCTGGGGGTCTTTTTTCGGTGGCCTCGGTATAGGTACTGGAAGCGG  
CACTGGGGGACGCACAGGCTACATAACAGTGGGCACCAGACCAACAACCTGTCGTTGATGT  
AGGACTGGCGCCAAGGCCACCTGTAGTAATAGAACCTGTGGGGCGTCTGAACCATCTAT  
TGTTAATTTGGTGGAGGATTCTAGCATCATTAATGCTGGGTCTCTCATCCAACCTTTAC  
CGGTACTGGTGGGTTTGAAGTTACCACTCAACGGTGAAGTACCCTGCAGTCCCTGGACAT  
CACTCCTTCGGGTAATGGGGTGCAGGTAGCAGCAGTAGCTTTGTGAATCCTCTCTTCAC  
TGACCCTGCTATTATTGAGGCTCCCCAGGCTGGGGAGGTTACAGGGCATGTGCTTGTAG  
CACTGCCACATCAGGGTCCCACGGCTTCGAGGAAATACCAATGCAGACCTTTGCGACCTC  
TGGTGGGGATGGAGGAGAGCCCATAAGTAGCACACCTGTCCCAGGCGTGCGCAGGGTTGC  
TGGGCCCCGCTTTATAGTAGGGCTAATCAGCAGGTGCGGGTCCGGGACCCTGCCTTTAT  
TGACCGTCTCGCGATTGTTGGTGACATTTGACAACCCTGTCTATGACCCCCGAGGAACTAT  
AATATTTAGCATCCAGGCTTGACATGAGCCAGGACCCAGACTTCCTGGACATAGTGTC  
ACTGCACCGCCCTGCCCTCACATCCACCCGCGAGGTAAGTGTCCGCTTCAGTCCGTTGGG  
ACGCCGGGCCACGCTTCGCACGCGTAGTGGTAAACAAATTGGGGCTAGGGTACACTTCTA  
TCATGATATCAGCCCTGTGCTCCCCGAGGAATTGGAGATGGAGCCGCTGTTACCCCCAC  
GTCGGAGCCCCATATGACATATATGCCGAGTCCGATTTCTTGCAACCCCTTAGATTCGGA  
TGTCCCCGCGGCCCTCGAGGTACCCTTTCCCTGGCAGACACTGCAGTGTCTGCATCCAC  
CGCTTCTACGTTGCGGGGGGCCACCCTGTTCCCTGTGAGGTGGTGTGGATGTGCCTGT

GTATACCGGTCCTGATATTGACCCGTCTGTAGGCCCTGGTATGGGACCGCTGGTGCCTGT  
GATACCAGCCATACCATCCTCTGTGTACATAGTTGGGGGTGATTACTACTTGCTGCCAAG  
TTATGTTCTGTGGCCTAAACGACGTAAACGTGTGCACTATTTCTTTGCAGATGGCTATGT  
GGCGGCCCTAATGAAAGCAAGGTATACCTGCCTCCAACACCTGTCTCAAAGGTGCTCAGTA  
CGGATGTCTATGTCACGCGGACGAATGTTTATTATCATGGTGGGAGCTCTCGGCTCCTCA  
CAGTAGGCCATCCATATTATTCTATAAAAAAAGTGGCAATAATAAGGTGTCTGTGCCCA  
AGGTATCGGGCTACCAGTACCGTGTGTTCATGTGAAGCTGCCGGACCCTAATAAGTTTG  
GTCTGCCTGATGCCAACCTCTATGATCCCGACACCCAGCGTCTGTGTGGGCCTGTGTCTG  
GCGTTGAGGTGGGTCTGTGGCCAGCCTCTGGGTGTAGGGATATCCGGCCACCCTTATTATA  
ACAAACAGGATGATACTGAAAATTACACAATCCCGACGCAGCTGATGATGGGAGGGAGT  
ATATATCCATGGATTATAAACAGACACAGCTGTTTATTTTGGGTGCAAGCCCCCTATAG  
GTGAGCATTGGTCCAAGGGCACTACCTGCAGCGGTCTTCTGTCTGTTGGTGACTGTCCCC  
CCCTGCAGTTTACAAATACCACTATTGAAGATGGGGATATGGTTGAAACCGGGTTCGGGG  
CGCTGGATTTTGC CGCTCTACAGTCCAACAAATCAGATGTCCCCCTGGATATCTGTACTA  
ACATATGTAAATATCCAGACTATCTGAAGATGGCTGCAGACCCTTATGGCGATTCTATGT  
TCTTTTCCCTGCGCAGGGAGCAAATGTTCACTCGGCATTTTTTCAATCGGGGTGGGTCTGA  
TGGGTGACGCCCTCCCGGATGAGCTATATGTCAAGAGTTCTACCGTCCAGACCCCCGGTA  
GTTATGTTTATACCTCCACTCCCAGTGGCTCTATGGTATCCTCTGAACAGCAGTTATTTA  
ACAAGCCTTACTGGCTGCGGAGGGCCCCAGGACATAACAATGGCATGTGCTGGGGCAATC  
GGATCTTCCCTAACAGTGGTGGACACCACGCGCAGCACAAATGTCTCTTTGTGTGCCACTG  
TAACCACGAAAACCTAATTATAAAGCCTCCAATTATAAGGAATACCTTAGGCATATGGAGG  
AATATGATTTGCAGTTCATTTTTCAACTGTGCAAAATAACACTCACCCCCGAGATAATGG  
CATAACATACATAACATGGATGCGCGGTTGCTAGAGGACTGGAACCTTTGGTGTCCCCCAC  
CCCCGTCCGCCAGCCTGCAGGACACCTACAGGTATTTGCAATCCCAAGCGATAACATGTC  
AGAAGCCACACCCCCCTAAGACCCCTACTGATCCCTATGCAACCATGACATTCTGGGATG  
TGGATCTCAGTGAAAGTTTTTTCATGGATCTGGACCAATTCCCCCTGGGACGCAAGTTTT  
TATTGCAGCGGGGGGCCACCCCCACTGTGTCTCGAAAACGCGCGCTGCAACTGCAGCGG  
CGCCCACTGCTAAACGCAAAAAGGTGAGGCGATAGTGATTCTGTGTCTGCCCTCATTTCCCT  
TTGCTCTACTTTTGTATATGTACATATGTTTCAGTGTTGTCTGTGTGTTGTGTTTGTGT  
GTGTTGTCTGTTATTATGTTTGCATGTACACATGTCGGTACACATGTCTGGTATGTATTC  
CTCCCATATGAATAAACGTGTGTATGTGTTGTGTGTCTGTTGCACTCTGTAATTGTCC  
CCGCTGCATGGTTTGCACACTGTGGCCTGTATGTAGCCCCCTGGTAGATACGACCGTTTT  
CGGTTGCGTGCAGTTTCGGTCGGCGCTGCTGCCAGCACACTCATATCCTTTAATCCTTTA  
ATTGCTTTAATCCTTTCACTTTTTTACTGTGCCAACTAAAATGATTTTGCTTTTTTGATTG  
TTTTGTGTCTGCATTAATGCAGTTTTTCTTTTTCCAGTGCCAGACCGCGTGTGGGCGTGC  
ACATTCTACATAGATTATCTTCCTGTGTTGGCGGGGATTTTCCCTGCGTCTGCAGAAAA  
ACCTGCCACCACAGCACCTTGGGCGCGTCGTTTTTTGAGCCAACCTTTCCCTTGCCAAGTT  
GTCTTGCCGCGCATTTCCAAGAAACACACCTATTCCGGTGCGAATCTCTACTATGTGGTTT  
A

>gi|40804528|emb|AJ620211.1|\_Human\_papillomavirus\_type\_94\_complete\_genome

TAATGTAGAGAATAAGAAATAGGGAGGGACCGAATACGGTGCAGACCGAAAGGGGTACATA  
TAAACAAGGCACTTACAGACTGGCAGACGCCATGTCTATGGGTGCACAAGAACCCAGAA  
ACATATTCTTATTGTGTAGGAACTGTGGAATATCATTTGAGGACCTTCGCCCTGTGCTGCG  
TGTTCTGCACCAAACAGCTGACCGTAGCCGAATTGACTGCATTTGCATTAAGAGAATTGA  
ATTTGGTGTGGAAAGCGGGAGTGCCATACGGTGCCTGTGCCCGGTGTTTACTTCTGCAGG  
GCATTGCACGGCGCCTAAAATATTGGCAATATTCATATTATGTAGAAGGCGTGGAAGAGG  
AGACCAAGGAATCTATAAATACACAGCAGATCAGATGCTACACGTGCCACAAACCGCTTG  
TAAAGGAAGAAAAGGACAGACATCGTAACGAACGGCGACGACTGCACAAAATATCAGGGT  
ACTGGAGAGGGTGTTGTGCTTATTGCTGGACACGATGCACGGTCCGCATCCACAGTAAA  
AGATATAGAATTGAGTCTTGACACAGAGGACATCCCTGTAGTATGCAATGTGCAATTAGA  
TGAAGAAGATTATACAGATGTGGTGGAACCAAGCACAACAAGCGTATAGGGTGGTAACAGT  
ATGTCCAAAGTGTTAGTTTACCACTGCGACTGGTGGTAGAGTGCAGCCACGCAGATATAAG  
GGCACTGGAGCGTCTGCTGCTAGGCACATTGAAGCTCGTGTGTCTCGCTGCGTGTAACA  
GGACATGGACGATAATACAGGTACAGAGGGGGGCGAATGTTCCGAGGCGGAACGGGCGGG  
AGGATGGTTTATAGTGGAAGCCATTGTAGACAGGCGGACAGGCGATCCCCGTATCCAGTGA

TGATGATGAGGATGAGGATGAAGAAGGGGGAGATTGTGTAGACTTCATAGATGATACCAG  
GTCTGTAGGGGATGGACAGGAAGTGGCACGGGAAGTGTTCCTGCAGCAAGCAGCTGCGGA  
TGACGATATAGCTGTGCAGACTGTAAAACGAAAGTTTGCACCTAGTCCTTATTTTCAGCCC  
TGTGTGTGAACAAGCCAGCATAGAACATGAACCTAAGTCCAAGGCTAGACGCCATAAAGCT  
GGGGAGACAATCAGCAAAGGCTAAACGTCGTCGTGTTTGTAGCTACCGGACAGTGGGTATGG  
CCAAACACAGGTGGATACGGAATCGGGACCAAACAGGTACAGGGCAGCAATGAGACGCA  
AGATGGCCGCCAGGATGATGAGGAGGGGAGTGTGGTACAGAGCAGATGTGAGATGGGCAA  
TCAAAATGGCCGCCAGAACAGTACAGAGGGGAGCGGGAGGAATGTGGGGGACCATGGCAG  
CCAAGAGGAGGAGCGTGCAGGAGGGGATGGGGAGGAATCGGAGTCCCACAGCATAGACAC  
TGGCAGGGGAGCAGGCGGCGTGTAGCAATATTTAAAGCCAGCAATCATAAAGCAACTTT  
ACTGGGTAAAGTTCAAAGAACAATTTGGATTGGGATATAATGAACTTATTAGACACTTTAA  
AAGTGATAGAACAGCATGTGTAGATTGGGTGGTGTGTGTATTGTTGGGTGTATTGCACGGT  
GGCAGAGGGCATAAAGACCCTTATACAGCCATTGTGTGATTATGCACACATACAAGTGCT  
ACCATGCCAGTGGGGAATGACAGTGTATGCTGGTACGGTACAAACGTGCCAAGAACAG  
AGAAACAGTAGCAAAAGGCTTAAGCACATTATTGAATGTACCAGAAAGCCAGATGTTAAT  
TGAACCACCAAAATTAAGGAGTGGTCCAGCTGCGCTGTATTGGTACAAGACCAGCATGTC  
CAGCTGTAGTGATGTGTATGGAGAGACACCAGAGTGGATAGTTAGGCAAAACAATGGTGGG  
ACATGCAATGGAGGATGCGCAGTTTACCCTTTCAGAGATGATACAGTGGGCATATGATCA  
CGATATTACAGATGAGAGCACTCTGGCATAACGAGTATGCACTGATTGCTGACACAGATGC  
CAATGCTGCTGCCTTTCTTGCTAGCAACTGTCAAGCAAAGTATCTAAAGGATGCATGCAC  
AATGTGCAGACATTATAAAAGAGGAGAACAGGCGCGTATGAGTATGTCAGAATGGATACG  
GTTTCAGAGGCGACAAAGTACAGGGAGATGGAGATTGGAAGCCCATAGTCCAATTTTTTAAG  
ATATCAGGACGTTGAATTTATACCATTCTTATGTGCCTTTTAAACATTTCCTTCAAGGAAT  
TCGAATTCCAAAGAAAAGTTGTATAGTGTTTTATGGTCCAGCAGACACCGGAAAATCATA  
CTTTTGCATGAGCTTACTTAGATTCTTGGGGGGTGTCTGTTATATCATATGCAAATTCAG  
CAGCCATTTTTTGGTTACAACCATTATCGGAAGCCAAAATAGGGCTGTTAGACGATGCAAC  
CACTCAGTGTGGAAGTATGTAGATACTTATTTAAGAAATGCCTTAGATGGTAACCAAGT  
GTGTATAGACAGGAAGCATAGGGCCTTGCTACAGCTAAAATGCCCTCCGCTATTAATAAC  
AACAAATGTGAATCCACTGGCGGATGAAAAATGGAAGTATTTGCGCAGCAGGTTGCAGCT  
CTTCACATTTAAAAATCCTTTTCCAGTGACAGCACAAAGGAGAACCCTGTATACATTTAA  
TGATCAAAATTTGGAATGCTTTTTTTCGAAGGTTATGGGCACGTTTAAAGCCTTACCGATCC  
TGAAGACGAGGATGAAAATGGAACCCCTAGCGAACCCTTTAGATGCGTGCCAGGACAAAA  
TGCTAGAACTTTATGAAAAGGATAGCAACAACTTGAGGACCAGATCACGCATTGGCACC  
TATTGCGTGTAGAAAATGCTTTGCTGTACAAAGCAAGAGAATGTGGACTGACACATATTG  
GCCATCAGGTGGTGCCACCTCTTAGTGTAACCTAAAGCCAAGGCACGCAATGCCATTGAAG  
TGCATGTAGCTTTACAGCAATTACAAGACAGTGCCTATGCACATGAATCCTGGACATTGA  
GAGACACATCACGTGAAATGTGGGACGCGGCCCTAAAGGGTGCTGGAAAAAAGAGGGA  
TAACTGTGGAAGTAAGATATGATGGAGACGAATCTAAAGCCATGTGCTATGTACAATGGA  
GGGATATTTTTTGTGCAGAATTATAGTGACGATAGATGGGTAAAGGTGTCAGGCCACGTCT  
CACACGAGGGACTATATTACACACATGAAAATGAAAACATATTTTATGCGAATTTCAAGG  
ATGACGCGTTTGTATACGGGGAAACAGGTAAATGGGAGGTGCACGTGGGAGGCAAAGTAA  
TTCACCACCATGCATTTGACCCTGTATCTAGCACACGAGAAATATCCGCTCCTGGACCTG  
TGTGCACCAGCAACTCCACCCACGCGCCACCAAAGCCCAGGTGGGCGCGACCGAGGAAC  
CGGAACAAAAGCGACAGCGATTTCGAGGCGGTTCGACGGACAGCAGCAGCGGCAGCGACAAG  
GGTCCCAAGATCCCACCCAGAAAGCCTGTGAACGAGCGGGTGGACCATTTGGACAGTGACA  
GCACCCGGGTGTGTGACACTCGACGTGCATTCCCCGTCTGGCCTCCAAGTGACCCTGACT  
GTGCACCTGTAATACACCTAAGAGGTGATCCTAACTGTTTAAAATGTTTATAGATATAGAT  
TACATCACGGGAAAAGGAACTATACTACGGTCCACCTCCACATGGAGGTGGTCCTGTG  
AATTCAGAAAATCAAGCAAGCTTTTGTAAACAATCTGGTACACAAGCGAAGCACAGCGTGCAG  
AAATTTCTCAATGTTGTAAAAGTACCCCTGGCATAACAAGTAATTTTGGGTATATGTCAA  
TCTTCTAATTGCTGTATTGTGACAGTGATATCCTGGATTTTTTATTTGTGTAGACTAC  
ATTGCTGGGCTTTTTTTGTGCTGCTGCTGTGTCTGTTTTGGCTGAGTGTGCTTCCTGCGC  
TGACGTGCTATTTGGCAATTGTGCTCTGTGTGTACCTGGGCCTGGTAGCATTGTATTTTC  
AAATTGTGTCACGTATACTTCAAAACACATAGGTCTCACAATGTATCCTCTTGTATTAAG  
AGATAACACTGGTGACCATACTGTATTGTTGTTTGGAGCCCGGAGATGTGTATTTACTGCT



GTGTATAATATTGTTTGTACTTATGGCATTGTTTGTTTTATATAGACACCTGGGTGTATT  
GTGATATGGATGTAGACGCCTGTGCATAATCTAATGTTTTGCTGTGTGTACCCTTATGTG  
CTATTGTAGCACCCCTTGTTTTTTTTTATTCTTTTGTTTTTTACAGTTAAATAAAGCAACCA  
TGGTGGCACATCGTGCAAGGCGTCGCAAGCGTGCATCCGCCACACAGCTTTATAGGACCT  
GCAAAGCCTCAGGCACATGCCCCCAGATGTTATCCCAAAGTGGAAGGCACCACCTTTGG  
CAGATAAATTACTGCAGTGGGGTAGTCTTGGTATATTTCTGGGTGGTTTAGGCATTGGCA  
CCGGGTCTGGTACTGGGGGACGCACAGGGTATGTTCCCTGTCAGTACTCGGCCTGGTACTG  
TTGTAGATGTTAGTGTTCCCTGTCAAGCCACCTGTGGTGATTGACCCTGTGGGTCCGTCTG  
ATCCTTCCATAGTAAATTTGTTAGAGGACTCTAGTATTGTAAATGCTGGGTCCACCATT  
CTACATTTTCTGGTACTGGTGGCTTTGAAGTGACCTCTTCTGCCACCACTACCCCTGCTG  
TGTTGGATATTACACCTGCTGGTGATAATGTAGTGATTAGTAGTACAAGCTTTACCAATC  
CTGCATATACAGAGCCATCTCTTGTGGAAAGTTCACAGAGTGGTGAAGTGTCGGGACACA  
TTCTCATAAGCACACCTACAGCTGGTACCCATGGTTACGAGGAAATCCCAATGGACACTT  
TTGCTTCGTCGGGCACTGGCACGGAACCCATCAGTAGTACTCCTGTACCTGGTGTTAGTA  
GGATTGCAGGCCACGCTTATATGGCAAGGCTACCACGCAGGTCAAAGTGTCAGATCCTG  
CATTTCTGTCACGTCCTCCACTTTTTTAACATTTGATAATCCTGCATTTGAGCCAGAGG  
ATGAAACCATTATATTTGAACGTCCGTACTCTCCTTCGCGAGTTCCGGACCCTGATTTCC  
TTGACATTGTGCGTTTGCATCGCCCTGCATTGACATCTCGCAGGGGTGCTGTGCGTTTCA  
GCCGTCTGGGTCAAAAGTTTAGCATGCGTACGCGCAGTGGCAAAAATATCGGGGCCCGGG  
TGCAATTACCATGACCTCAGTCCTATTGCGGCCACCGAGGAAATTGAAATGGAACCTT  
TACTTGCCCCAGCAGATCCTGACACTCTATATGACATCTTTGCTGATGTGGATGATGGTG  
ATGTTGCCTTTACAAATGGCACTCGAAGTGTACACCGGCACGGAGCTATAGTACTGCTT  
CCCCTTTGTCTCTACACTTTCAACTAAGTTTGGCAATGTCACCATCCCATTGTGTCTC  
CTGTTGATGTAACTTTACATACCGGGCTGACATTATATTACCCACCTCGGCGCAGTGGC  
CTTATGTGCCTTTAACACCTGCTGACACAACACATTATGTTTACATAGATGGAGGGGATT  
TTTATCTCTGGCCTGTTACCTTTTACTTGTCCCGACGTCGTCGTCGTAAACGTGTTTAAAT  
ATTGTCTTGACAGATGGCACTCTGGCGCCCTAGTGACAACCTGGTGTACCTGCCTCCTACT  
CCCGTGTCCAAAGTTCTCAGCACGGACGACTATGTGACACGCACCAACATTTATTATTAT  
GCAGGCACCTTCTCGGTTGCTTACTGTAGGTCATCCTTATTTTCTTATACCTAAATCATCT  
AACAATAAGGTAGATGTTCCCAAAGTATCTGCATATCAGTATAGGGTGTTCGGGTGCGG  
TTGCCTGACCCCAATAAGTTTGGCCTGCCTGACGCCCGCATATATAATCCTGACGCCGAG  
CGCTTAGTCTGGGCTTGCCTGAGGTTGAGATAGGTGCGGGGCTGCCCTGGGTGTGGGC  
CTCAGTGGACACCCTTTATACAATAAGCTGGATGACACAGAAAACCTCAACATAGCACAT  
GGGAATGTTGGTCAGGATTACGGGACAATATTTCTGTGGATAATAAGCAAACCTCAGTTA  
TGTATTCTTGGTTGTACACCTCCCATGGGGGAGCATTGGGGCAAGGGGACCCCGTGCAAT  
AGGTCGGCGCCTGCACCGGGCGACTGCCCTCCTCTGGAGCTTGTGACTTCAGTTATTCAA  
GATGGCGATATGGTGGACACTGGCTATGGTGCTATGGACTTCACTGCATTACAGTTAAAT  
AAGTCTGACGTGCCTATAGATATTTGCCAGTCCACTTGTAATAACCTGATTATTTGGGC  
ATGGCAGCAGAGCCTTATGGCGACAGCATGTTTTTTTTATTTGCGCAGAGAGCAACTGTTT  
GCAAGACATTTTTTCAATAGAGCCAGTGCAGTGGGAGACACCATTCTGACACTCTAATA  
TTGAAGTCGGCCGGTGGTGACCAAAACGTTGGTAGTGCTGTGTATAGCCCCACTCCCAGT  
GGGTCCATGGTAACATCAGAGGCTCAATTATTTAATAAGCCATATTGGCTGAAGCGGGCT  
CAGGGGCACAATAATGGTATTTGCTGGGGCAACCAAATGTTTGTGACTGTGGTGGACACC  
ACACGCAGCACAAATTTGTCCCTGTGCGTCCCTTCTGATGCCTCCACCGCCACTACGTAT  
GATGCTACAAAATTTAAAGAATTTTGGAGCACGGAGAAGAGTATGACTTGCAGTTTATT  
TTTCAGCTGTGTAAAGTGACTTTAACCCCCGAAATTATGGCCTATTTACACACCATGAAC  
AGTAGTTTACTAGAAGATTGGAACCTTGGGTTGACTCTGCCGCCGTCCACTAGCTTGGAG  
GACACTTATAGGTTCTTGTCTGCTCCTCCGCAATAACTTGTGAGAAGGAGGCACCCCCACT  
GAAAAGCAAGATCCCTATGCAAAAACCTAAACTTTTGGGACGTGGATCTGAAGGATAGGTTT  
ACCCTAGACCTGTCTCAATTTCCCTGGGCGAGAAAGTTTTTGTGTCAGCTAGGTGTACGT  
TCTCGCTCCGCTACTCTGTGTCGCAACCGCTCGGCGACCGCCGCGTCAGGATCCACCGCT  
GCAAAAAGAAAAAGAACCAAGAAATGACCCCATGTTTGTGTTTTTATGTATGTGCATATT  
TGTGTATGTTGTTTGTCTGGTAATTGGTGTATGTTATGTGTACGCTTGTATGTATTTACT  
GTGTATGTATTGTACTGGAATGCATGTGTGGATGTGTAAATAAAGTTTGTACATAGTTT  
TATATTTTTTAATTTGTGTAATTGCTGTTCCCTGTGAGTAAGTAAGGTAGTTCTAGGTCAG

AGGACCGATTTCGGTTCAAAATGGCCGCCTTTGCAGGTGTGCAAACCACCAATTAGTCAT  
ACTGATCCATATCCTGCGACCTGCCCTGTCACGCATGTGTTTTTGGCTGGCATTGTATGG  
TTTCTATTATTTATTTTACTGCTGCATCATGCTTTCTGGCACGGCAAAATGTCTCCATTG  
CAATTTTAACTGCTTCTGGGCACCAACTTATTATGACTACTTTTACATAATTGCTGTCTT  
GGCTGCGTTTTCTAGGTTGCCCTGCCAATAAAATGTGCTTCCAAATCTCCACCAAGACAC  
ACCTAATCCGGTCGCTGCTTGTCTTTCTAGCTTTAATTAATGCAGTTGCTACACGTCTCTT  
TCCAACCTATAATTATAAACTA

>gi|40804520|emb|AJ620210.1|\_Human\_papillomavirus\_type\_95\_E6\_gene,\_E7\_gene,\_E1\_g  
ene,\_E2\_gene,\_E4\_gene,\_L2\_gene\_and\_L1\_gene

AACATTGTTTTCTTAATAATAGTTGGCAACAATCATCTCTTATAATAAAATATCACCGG  
AAGAGATACATATAAAAAGAGAGCGGTTCTTGCAGAAATTCTCTTTCCAGATGGCAAATG  
GCAGACCTACAACCTTGGACGAGTACTGCAGGAGATTTGACATTTCTTTTTTTGATTTGC  
GTCTTCCTTGATTTTTTGTCTTTCATCCGGTTGATCTTGCAGAGCTTGCTTCGTTTTATA  
TTAAGAAATTAAGTTTGGTTTTTAGGGGTAGCTGTTATTATGCATGCTGTTCTCAATGTT  
TAAGATTAAGTGCAAAGTTTGTAGCAAGAGAATTATTTTCAGTGTTCTGTATATGCTACTG  
GACTGGAAGATTTAGTAGGACAAAAAATCAGGGATATATGTGTAAGATGTTTATGCTGTC  
TTAAACTATTAGACATAGTAGAAAACTTGACCTGTTATACAGTGAGGTGAGGTGTGCTATT  
TAATAAGGGGTTTGTGGAGGGGCTATTGCAGAACTGTATTAAAGAAACAATGAGAGGAGC  
AGCACCATCTATTGCAGATGTTGATTTAAACCTCCATGAGTTAGTTGTTCTCTGCAAATTT  
GCTGACCGGATGAGGTCTTGCAACTCTCTGAGGAGGAGGATGAAGAAAGAGAGGAGGAGCT  
TTTACCATTAGATAAGATACCTGTTGTTGTTATAATTGTGAAGCAAATGTAAGAATCACTTT  
GTATGCTGTTGCATTTGGACTACGAGTCGTGGAACAACCTTCTTCTGGAAGGGAAGGTGAT  
ATTTTGTCTGTGTTGGGTGTGCAAGAAATCACAGCAGAAATGGCAGATAAAAGGTACTGAAA  
ATTTTGCAGCTTTGGAAGGGAGTAGTTGGTATTTTTGTTGAGGAAGCAGAATGCATAGACA  
GCATAGATACTGTGGATGAGTTATTCGACGAAAGTACTGACGGTTCAAATATATCAAATT  
TGATTGATGACGATGAAGTTGATCAGGGAAATTCCTTGGCACTGTACAATACACAAATAA  
CTGATGCTTGCGAAAATGCTATAGCTGCCCTAAAACGAAAGTATACCAAAAAGTCCACAGC  
AGGCAGTTGCCGAATTGAGTCCGCAGTTGCAGGCTGTGAGAATTACTCCTGACAGAAAGA  
GCAAAAGGAGATTATTTGAGGACAGTGGGATTTGTGAAGATGAAGCTGAAAATTTCTGTTG  
CACAGGTAGTCTCTGATAAAGAGGAAGCTGGCACAGCCAGTCAAGATGGCGCAGGGGATA  
TTAACCTTTTGTATTATGCAGGACAATAACCGAAGGGCAACTATGCTTGCCAAATTTAAAG  
ATTGGTATGGAGTTTCATATACTGAAATAACAAGATTATATAAAAGTGATAAATCTTGTA  
GTGATAAATTGGGTGTTGTTATATTTAAAGCTCCTGTAGAGGTATTGGAAAGTTCTAAGA  
TCGTCCTTCAACAGCATTGCCAATACATTCAAGTAAAGATATTTGGATTTTCTGCTCTTT  
ATTTATTACAATTTAAGAGTTCCAAAAGTAGAGAGACTGTTTATAAGTTATTATGTTTCGT  
TGTTAAATATACAAGAGTTTCAAATCTTAGCTGATCCTCCAAAATTACGAAGCGTTCCTG  
CAGCTTTATATTTTTATAACATGCTTTGTTAACCTGAATGCTTTGTATATGGACAAACAC  
CGGATTGGATCGCTAAGCAGACAATAGTGAGCCATCAGTCTGCTACAACCTGCAGAAACAT  
TTGAGTTGTCAAGAATGGTTTCAGTGGGCATATGATAATAACCATTTAGAAGAATGTGATA  
TAGCTTATCATTTATGCTTTATATGCAGATGAGGATGCTAATGCTGCAGCATATTTGAAAA  
GCAATAATCAAGTAAAACATGTAAAAGATTGTAGTACAATGGTAAGGATGTATAAAAGAT  
ATGAAATGAGAGAAATGTCCATGTCAGAAATGGATTCAATAATGCTGTAATGAATGTCCTG  
AAGAGGGAGATTGGAACCAATCTCTCACTTTTTTAAAATATCAAGGTGTCAATATTCCTTT  
CATTTCTTATAGTATTTAAATCATTTTTTAAAGGTATTCCAAAGAAAAATGTATTTTAA  
TTCATGGACCACCAGACACAGGAAAATCATTTGTTTTGTTACTCATTGATAAAGTTTTTAA  
GGGAAAAAGTAGTGTATATGTGAATAGAAGTCAATTCTGGTTGCAACCACTTATGG  
ATGGTAAAAATAGGCTTTCTGGATGATGCAACATATGTGTGTTGGACATATATAGATCAAA  
ATCTTAGAAATGCTTTAGATGGTAATCCTATGAGTATAGATGCTAAACATAGAGCACCTC  
AACAATTAATAATTACCTCCAATGTTAATAACTTCTAATATTAATGTTAAACAAGAGCAAA  
CATTAATGTATTTGTCATAGTAGGGTACAATCTTTTGAGTTCCCTAACAAAAATGCCTTTTT  
TAGATGATGGTTCCTTTTATATACTTTTACTGATGCTACTTGGAATCTTTTTTCGAAA  
AGCTTGGCAGACAATTAGATCTATCAGAGCCTGAAGAGGAAAAACAATGGAGTCCTTAGTC  
GCACGTTTTCGATGCACTTCAAGAAGAAATTTCTGACTCATATTGAGTCAGGAAATACAAC  
TTGGAATCCCAAATCAAATATTGGGAGAATGTAAGAAAAGAAAATGCTATCATGCATTAT  
GCACGAAAAACAAGGGCTGACTAAATTGGGTCTTCAACCCCTTCCTTCACTTTTAGCAAGT

GAATACAATGCAAAACAAGCAATACAGATACAGCTAACATTACTATCATTATTAAAGTCG  
CCCTATGCTTCTGAACCTTGGACATTACCAGAAGTCAGTGCAGAATTGATTAACACGCCC  
CCTCAGAACGTTTTTAAAAAAGGGGGGGTATGATGTAAGTGTGTGGTTTGATGACGATAGA  
AACAAATACAATGGTATATACAACTGGACTGCTTTGTATTATCAAGATGCAAATGAAATA  
TGGCATAAAGTAAAGGGTGAAGTGGATTATAATGGTCTGTTCTTTACAGACCATACAGGA  
GAGCGTGCATATTTTACATTGTTTAGCACAGATGCTGAAAGATATAGCCAGACTGGACTA  
TGGACTGTGCATTTTAAAACCCAGGTTATTTCCCTCCTCTGTTGTTAGCTCTACAAACCCC  
TCCTCCTTCGACTTCGAGGAACAACCTACCCGGGCCCTCCACCAGCAACACCAAACTACC  
AAGCAGACGTCCCCCTCGGGGAAGGGGATCGCAGTCGAGGGAAC TACAACCATCCTCCACA  
ACGTCCCCCTGAAGGGAAGGGGTACGAGTACGACGACGACGAGGACAAGGAGAATCAGGG  
TCCGGGACAAGAGAAACCCCCAGCAAAAAGAAGAGGAGGAGGAGGAAGAGGAGAAAAAG  
GAATTTGGATCTGCACCAACTCCTTCAGAAGTGGGATCAAGACATCGACAAGTTGAAACG  
AAAGGTCTGTCACGACTTGGACAATTACAAGCAGACGCTAGGGATCCGCCAATGATTATG  
TTAAAAGGCCATGCAAATTCATTGAAATGCTGGAGATATAGAAAATAACTTCAAATTCT  
TGTGGCTTCCTTTATATGAGTACTGTTTGGAACTGGGTGGGGATTCCCTCAGAAAATCAT  
AGTCGAATGTTAATAGCTTTCCACAGTACAGACCAGAGAGATTACTTTGTAAAGCATCAC  
TTCTTCCCCAGACAGTGCACATATACATTTGGTTCTCTGAACAGCCTGTAAAATGAATTC  
TGCACGGAGAGTAAAGCGAGACTCAGTCCCTAATCTTTATGCAAAATGTCAACTTTTCAGG  
CGATTGCCCTTCCTGATGTAAAAATAAAGTAGAAGCTAACACTATTGCTGACCGTTTACT  
GAGATGGTTGGGAAGTATCATATACTTGGGTGGGCTGGGCATAGGTACTGGCAGAGGGAG  
TGGGGGCTCTTCTGGGTATAATCCACTAGCGACCCCAAGTAGAGTTACCCCTAGTGGAAC  
TCTAGTAAGACCCACAGTTCCAGTAGAAGGTCTGGGCCCGGTTGAAATAGTTCCTGTTGA  
TGCAGTAGATCCTGCAGGCTCCTCCATTGTCCCGCTCACTGATGTGTCTGTTCCCGAGGT  
GGTTGTGGATGGCGAAGGTGGGGCAATAGATTTTAGGACCACCCGAAGATACAGGAGTCAC  
ATCTCGCCCCCTGAAATATTAACAACCTCCAGACCCTGTTTCAGATGTTTCAGGTACCAA  
CAGCCACCCAACAATAATTTTCAGGAGAAGATAACACAATAGCTGTGTTAGACATATCTCC  
AATAGAGCCCCCACAACCGTATAGCCTTGGGCACACGTGGCCAGTCATCAACGCCACA  
CATAAGTGTCAATACAGGCTCGACCGATATCGGTCACTCTTCAGATATCAATGTATTTGT  
TGATGCACAGTTTTTCAGGAGATTCTATTGGTTATACAGAGGAAATCCCTTGCAGGATCT  
GAACACTATCCAGGAATTTGAAATAGAAACCCCTCCAAAAACCAGTACTCCACGTGACAC  
AATAGCCCGCGCAATAGGGAGGGCGCGAGAATTATATAATAGAAGAGTGCAACAAATTCA  
AACTAGGAATCCCGCTCTACTAGCTCAACCTTCCCGCGCGATAGTGTGTTGGTTTTGAAAA  
TCCCGCCTTTGATGCTGACATCACTCAGGTATTTTCAGCAAGATCTGGCACAAGTTGCAGC  
AGCTCCTGATCCAGATTTTGTGCTGACATTGTCAACAATAGGTGCGCCACAATTTTCAGAAAC  
AGAGAGTGGACAAATTCGTGTTAGTAGATTAGGACGCGAGGGGACCATACAGACTAGAAG  
TGGTATACAAATTGGTCAAGCAGTACATTTCTATTATGATTTAAGCACCATTGATACAGC  
AGATGCAATAGAATTGTCTACTTTAGGACAACATTCAGGAGACCAGAGTATCGTAGATGC  
AATGGCAGAAAGTAGCTTGATAGATCCTTTTCGCTACACCTGATACCACTGTTGCAGAGGA  
ACAGCAATTATTGGATCCTCAAACCTGAGGATTTTAGTAATTCTCATTTAGTACTAACTAC  
TAGTAACAGAGGTTCAACTTTGACTATTCTTACTATTCTCCAGGAATTGGTCTACGAAT  
TTATGTAGATGATATTGGTTCTGACTTATTTGTTTCTTATCCAGAATCAAGCTTAATTCC  
TCCTGGAGGATTACCAACTGAACCATTTTCCCTCTGAAGCCAGCATTATTAACAGATTT  
TTACAGTGATTTCACTTATTATCCTAGCTTATATCGCAAAAAACGAAAACGATCAGATCT  
GTTCTGACTTTGTTTTTTTTACAGAAAAATGACGAGTTGGTTGTCTACTACTGGTAAGGTG  
TACCTGCCTCCTGCACAACCTGTGGCAAGAGTTCTGGAAACAGATGAATATATTACTGGA  
ACATCACTATACTTCCACGCTGGAACAGAAAGACTTTTAACTGTAGGCCATCCTTATTTTC  
CCAGTGAAAGATGTAGGTGAACCTAAGAAAGTTTTAGTTCCAAAGGTATCTGGAAGTCAA  
TATAGAGTCTTTAGGTTTTCAATTGCCAGATCCTAACAGATTTGCTTTGATAGATAATGGC  
TTTTATGACTCTGACCATTGAAAGGTTAGTATGGCGTCTAAGAGGAATTGAAATAGGCCGA  
GGTGGACCTTTAGGAATAGGAACAACCTGGTCATCCTTTATTTAATAAATATGGAGACACT  
GAAAATCCAAATGCATATAAGACACCAACAGATGATAATAGACAGGATGTCTCATTAGAC  
CCTAAACAGACCCAAATGTTTCATAATTGGTTGTATTCCAGCTATTGGGGAGCACTGGGAT  
AAAGCTGAGGCATGCAGAGAACCAGCACCTCAGAAGGGTGATTGCCCACCTATAGAACTT  
GTAAACACATACATTGAGGATGGGGATATGTGTGATATAGGCTTTGGAGCTTTTAACTTT  
AAAGCTTTGCAGGATGATAAATCCAGTGCACCATTAGATGTAGTTGGTACTTTGTGTAAA

TGGCCTGACTTCTTAAAGATGAGTAAGGACATTTATGGTGACAGTTTATTCTTCTTTGGC  
CGAAGGGAACAGCTTTTATGCAAGACACTTTTTTGTAGAGCTGGGACAATGGGTGATGCG  
TTACCAGAGCCTTTTGAAGTGAAGTCTGATTACATAATTGCTGCTCAGAGTAACCAAGAA  
CAAAATAATCTTGGCCCTCACATTTATTTTGGAACTCCTAGCGGTTCTCTGTATCAAGT  
GAATCTCAGCTTTTTAACCGACCGTATTGGTTAAACAGAGCTCAGGGAACCAATAATGGT  
ATTTGTTGGGATAATCAGCTTTTTGTAACTCTGGTTGATAATACCCATAACACTAACTTT  
ACTATTTCTGTAAAGCATGAAGGAGAGGATAACAATTATACATATAAAGCAAATGATTTT  
AAACAGTATTTAAGACATATTGAGGAATTTGAAATGGAGTTTATCTTTTCAGCTTTGCAGA  
GTGCCTCTTACAGCAGATGTAATGGCTCATTTGAATGTCATGAACCCAAATATATTAGAT  
AATTGGCAATTGAATTTTGTTCACCCACCACCTTCTGGTATTGAGGATCAATACAGATTC  
ATTACATCCAGAGCTACTCGTTGTCCAACCTCAAAATCCACCAGCAGAAAAGAGACCCCT  
TTTAAAGATTTGTCTTTTGGACAGTTGATCTTTCTGAGCGTTTTTCTTCAGAATTAAGC  
CAATTTTCATTAGGAAGGCGGTTTCTCTATCAGAGTGGATTAATAAATGGATCTCGTAAA  
AGACAAAGAGCTATTACTTCTCAAACCTGCAACAGGCACAAAACGTTCTGCCAAACGAAAA  
CGTTTATCTAAGTAACCATGTAAATACATAATGGAATGTATTATTTCTGCCAGGAAAAAG  
TGCATATTGAGCCAATTATTATATAACCTATTGAAGGATAAAAAATTATAAATCTTTTAAA  
TGTGAATGCAATAAACTATAACCTCCAATTACTATTGTGTCCATGCTTTGTGACTCATGTG  
GTCAATATTGTGTCCGCACCCCTGATTACTTGGACTGCCTCCACATTAAGTAAGACGCTGG  
CGAAGAAAAGAGACGCTCCTTATTTTGGAAAAAATATTGAATTTGGCATTATTAGG  
CGGGAAACAGGACCGGATTCTGTTTCGCTATTTCCAGGAGTTAAAGGTAGGTGAAAGTTTTA  
CTACACCGATTATGAGTCAATTTGTCTGGCGGCGAAGAACGAATCTGGCTGCCTGCCTTT  
GCACCGGGAGTGGTTGT

>gi|40804509|emb|AJ620209.1|\_HumanPapillomavirus\_type\_81\_complete\_genome

CTTCCTTTCTTTTATAATATTTTATAACAATCATACATATAATAAAGTAGGGAGGTACCG  
AAAACGGTCGACCGGGAAGGATACATATAAAGCAAACCTGTATGGTCAGCACAGCAGTGA  
TGTCGCTGGGGCCAGCAAATCCTACCAATTTGTTTTTGCTGTGTAAGGAGTGTGAAGTGG  
ACCTAGACGACCTGCAACTGACCTGCATATTTTGCAAAAAGGAATTAACAGTAGGTGAAT  
TGCTGTCTTTGCAATAAGAGAGCTAAACTTGGTGTGGCGAAAGAACTGGCCATTTGGAG  
TATGCGCAGCGTGCTTGTGCAGAGAAGCTAAAGTACGGGAGCTGCGGCGGTGGCAATATT  
CGTGCTTCGGACCAACAGTAGAAGAGGAGACAGGGCAACCGCTTGACAAAATATATATAC  
GATGCCATGCATGCTATAAACCGTTAACATACCAAGAAAAGGAGTATCTTGTGACAGGCC  
TAATCCACTTTCATAAAATAGCTGGAGAGTGGATGGGAAAGTGCTGCCATTGTAGAGGAG  
CATGCATGGCCAGGCAGCAACGATAAAGGACATTGTCTTAGATGAGTATCCTGATGTGAT  
TGACCTACATTGCCACGAGCAATTGCTAGACAGCTCAGAGGAAGAGGTGGATGTGGATGA  
TAGGGACAGTGGTGAGCAACTAGTAGAACAAGCACAGCAGGCCTATAGGGTGGTTACTAC  
GTGTGGTATTTGTAGGTGTTTAGTTAGGCTGGTGGTGTAAAGTGGAGACGCAGACCTGAG  
GCTGCTGCAACAACTACTGACGGATACACTGTCCATAGTGTGTCCTGGCTGCGCATAAGT  
GACATGGCTGATGTGGAAGGTACAGAGGATGGGGACGGGGCGGAGGCCGCGGACAGGGCG  
GGAGGGTGGTTTATGGTGGAGGCTGTTGTAGAAAAAACACAGGGTATCAGGAATCAAGT  
GATGAAGAGGAAGATAGTGCAGATACAGGAGAGGATCTAGTAGATTTCATAGATACACGA  
TATCCAGGGGATGGGCAGGAAGTGCCGTTAGAAGTGTGTTCAACAAAATGCACAGGAT  
GACGCTGCAGCGGTGCATGCACTAAAACGAAAGTATATACATAGTCCCGCTGCAAGCTCG  
TGTGTGTCTTGGGTGGACCATGAACTAAGTCCCTCGGTTGGACGCCATAAGCCTAGACCGG  
GGGCACGAAAGGGCCCGAAGGCGGTTGTTTGACCAGGACAGTGGGTATGGCCATACGCAG  
GTGGATATTGGAACATCCGAAGGACAGGTACCGGGGGACGTGCAACAAACAGTAGAAAAT  
GTAGAGCAGGAAGTGCCGGAGGAAGTGCGGGGGGGGGGGGATGGGGAGCCTGCACCTACT  
GTGCATTTACAACAAACCCAGGAAGGTACAGCAAGTATAGTAGAGCTGTTGAAGGCCAGA  
AACTTGCGAGCCACGTTGCTAAGTAAGTTTAAAGGAATTGTATGGGCTGGCATTGGGGGAG  
CTGGTAAGACAATTTAAAGTGATAAATCAACATGTACAGATTGGGTGGTATGTGCATTT  
GGTGTGTATTATGCAGTGGCGGAGGCCCTAAAAACATTAATACAACCCTGTGCCATTAT  
GCGCATATACAAACGCAACAAGCCAATGGGGCATGGTGCAGTTAATGCTAATTAGATTT  
AAGTGTGGCAAAAGTAGGGACACAGTGGCGCATTGTATTGGAACATTACTAAATGTATCA  
GAAAAACAAATGTTAATAGAGCCACCAAAAAATTTAAAGCACGCCATGTGCATTATACTGG  
TATAAAACAGCAATGGGAAATGCAAGTGAAACAGTAGGGGAAACACCAGAATGGATAGTA  
AGGCAACAGTTGTGGGACATGCAATGCAGGAAACACAGTTTAGCCTGTCTGTAATGGTG

CAGTGGGCATACGACCATGATATAACAGATGAAAGCCAGCTGGCATATGAGTATGCATTA  
CTAGGCCATGAGGACCCTAATGCAGCTGCCTTTTTTAGCAAGCAACTGCCAAGCCAGGTAT  
ATAAAAGATGCCATTACCATGTGCAGACACTACAAAAGAGCCGAACAGGCACGCATGTCT  
ATGGCACAGTGGATAGCACATAGAAGCCTAAAGGTACCTGATACAGGGGATTGGAAACCA  
ATTGTAAGGTTCCCTAAGGTTTCAAAAAATAGAATTTATGACATTTATGGGTGCATTTAAA  
ATGTGGCTAAAGGGAATACCAAAAAGAAGTTGCATAGTTATACATGGGCCAAGTGATACA  
GGCAAATCATTGTTTTGCATGAGTTTAGTGCAATTTCTAGGGGGTGCAGTTATTTCCCTAC  
GTAAATGCATCAAGTCATTTTTGGCTATCACCATTAGCAGATGCAAAGGTGGGACTGTTA  
GATGATGCCACACACCCCATGTTGGGTGTACATAGATACACATTTACGTAGTGTGGTAGAT  
GGTAACTTAATAAGTATGGACAGAAAAATAGGAATTTAGCACAACTAAAAATGCCCCCA  
TTACTGATTACAATAACATAAATCCATTAGAAGACGTTACCCTAAAAATATTTACATAGT  
AGAATGGCAGTGTTTTAGCTTTATGTACAAGTGTCGGTTAGATGACAATGGGGACCCAGTG  
TATAAATTTAATAATGAAAACCTGGAAATCATTCCTCCAAAGGTCTGGGCACGTTTAGAG  
GTTAATCCAGAGGAGGAGGAGGAGGAGGAGGAGGAGGAGAATGGCAACACTAGCCGACCGTTT  
AGATGCATGCCAGGAGACGCTAATAGACCTTTATGAAAAAGATAGCAACAAGCTTGAGGA  
TCAAATAAAGCACTGGCATTGCATACGTCTGGAAAATGCTATATTGTTTAAGGCAAGACA  
AGCAGGACTTACACACTTGGGCCACCAGGTGGTGCCAACACTTAATGTTACAAAAGGAAA  
AGCCCACCAGGCTATAGCAGTGCATTTATCGTTACAAAGTTTATATGCAAGCGAGTATAA  
AGATGAACCATGGACACTACAAAACACGTCCTGGACATGTGGAATACACAGCCAAAGGG  
ATGTGGAAGAAAAAGGACGAGTAAACAGTAAAATATGATTGTGAGGACTCCAAAAA  
AATGGAGTATGTAACTGGGGGCATATATGTGCAAAGCCACATACAGAGCAATGGCA  
CAGGGTGCATGGACAGGTGAGCTACGACGGGCTGTACTACGAACTGGAGGGCCACAAACA  
GTACTATGTGCAATTTGCACAGGAGGCCAGAAAATATGGGGAGCACAAACAAATGGGAGGT  
ACATTGGGGTAACACAGTAATTTATGAACCATGCAACTCTGTATCTAGCACCCAGGACAC  
CCTGCGAGAAGTATCCCCTGCTGAAGCTGCTGACCGACTGCTGCACGCCCCCGAACCCGC  
CACCAGTACCCAGCACGTGGGCCCCGCCAAGACCACCAAGGCCCCAGTGCAAGGCGCCGCC  
TTGCAAGCGACAGCGAGTCAACCGGGACGGAGGGCGGCAGCCCGACACTGCACCACCGAA  
CATCTGGGTGGACAATAACAAATCAGGGGCCGACGGTTACCCTCACAGCACAGAAACACG  
GAACTTCAGTGACGGTGACACTGCACCTGTAATACATTTGCGAGGTGATGCAAACAAATT  
AAAGTGTCTTAGATATAGACTACGAAGCTCTGTACCACATTTATTTGTAAACGCGTCCTC  
CACATGGCATTTGGACCTGTGGAGAGGCAACGCAAAAGTGTGCATTTGTAACAATATGGTA  
TGCTAATGAAGACCAACGTGCTAAATTTTTTACAACGTGTGACAATACCAAAGGGCATACA  
AGCCATGCAGGGCTTTATGTCTATGTGTTTGTAAAAACATATTTGTGTATAAATGTGTAC  
TGTAACATACATATGTATATGGTGAAATGGTATAGTGAACTTATTGTTCTTGCTGTATT  
TGAGCCAGGTTTATACATTGTGGTACCACACCTGCATTGTGCAACCGTTATATAATAATC  
CTGGATGACCTGTTGTGTTTAAATATCTGGGTGGTGTATGTGCTTTTGCTGCTTATTCTA  
TTCTGGCTTTCCCTATCTGTCTGCCTTAACTGCATTTGCTGTGTTTTTTTGTATTATATAT  
ATTGGCCTGTTGTGTGTGATTTGCAGGTTTTGTGGTACATAGGCAGTATATAAACCAC  
CAACCAACCAGCCAATCACTGCTGCTACAGTGTATATAGGTAGTTAGTATGTATCCTGTT  
ATGGTCCGCACCCATACTGGGGGCACAGATATAGTGGTGTGTTGACATGGATAATAGTGGG  
TTATGGTTTTTTGTTGTGTATTATACTTGCCCTAATACTTTTTGTAGTGTATAAACTGTTA  
CAACTGTAACCTGCACATTGTTTTGTACTATAATTTTGCTACATATTTTTTAATAAATACA  
TTGTATACTCTATTGTATACCATGCCAAAGGTATTGCACCGTCGCAAGCGTGCATCTGTC  
ACAGACCTGTACCGCTCCTGTAAGGTATCTGGGACATGTCCCTCCGATGTAGTACCAAAG  
GTTGAGGGTAATACATTGGCAGACAAAATATTAATAATGGGCCAGTTTAGGTGTTTTTTTT  
GGGGGTCTTGGAATTGGTACGGCCTCTGGCTCCGGTGGACGCACGGGCTACATCCCTATA  
GGTGGCCGTCCCCCTCTGTAGTTGATATAGGTCCTGTGTCCCGTCCCTCCTGTAGTTATT  
GACCCGGTGGGGGCGCGGATCCTTCTATTGTTACTCTTGTAAGAGGAGTCCAGTGTATT  
GAGGCTGGGGCCACACCTCCCAACTTTACAGGGACTTCTGGGTTTGAATTACCACTTCC  
TCTACTACCAACCCCTGCTGTCTAGATATTACTCCACAGGTACTACAGTGCAGGTTAGT  
AGCACTAACTTTTTAAATCCCTTATATACTAGCCTTCCATAATTGACCTCCTCAAACCT  
GGGGAAATCACAGGCCATGTTTTTACAAGTACACCCACTGCTGGGTCCCATAGTTACGAG  
GAAATACCTATGGTAACCTTTGCATCTAATACTGGTACTGGTGGTGAACCCATAAGTAGT  
ACACCTATGCCTGGTGTACGCCGTCTTGCAAGGGCCCCGCCTTAGATTATATACCAAGGCG  
ACCCAACAGGTTCTGTACGTGACCTGCCTTTGTATCCCATCCTGCATCTTTTGCAACA

TTTGACAATCCTGTGTATGATCCAGAGGAACTATTATTTTTGAACATCCTAGTATATAC  
CAACCACCTGATCCTGACTTTTTTGGACATTGTTCAATTGCACAGGCCTGCTTTAACTGCC  
CGACAGGGTACTGTTCCGGTTAGTCGTATTGGTCAGCGGGCCTCCTTACGTACCCGAGT  
GGTAAACATATTGGTGCTCGGGTACACTTTTATCATGATATTAGTCCTATACCCACGGAG  
GCTGATATTGAGCTACAGCCCTTGCTGCCACCTTCCTCTGTGTCTTCTGCAGATGCCCTT  
TATGATGTATATGCAGATGACCAACATTTAGATGCTGTTTTGCAGTCTGTGCCCTCTTTG  
TCTTCCAGGTCCTCTGTTTCAGGCTCTGCCACTTTATCTGCTACCTCTGTGGCCTCCTCA  
TATAATACCACCGTTTCCTTTGTCTTCTGGGTTTACCATCCCTGCCTCTACTGGGCCTGAT  
GTAGAATTGCCCTTATGCTCCTTTAGCCCCCTTCTATAGTCCCTTCGTTTTCTTGCAACTACC  
CCGTACGCCATATATGTTGTTGGCACTGATTTTTTACTTGTTCCTTCTTATATATTCTTC  
CCTAAAAACATAAACGTATTTACTATTCTTTTACAGATGGCTATGTGGCGGCCTGGTGA  
CGGCAAGGTATACCTGCCTCCCACACCTGTGTCTAAAGTTATCAGTACGGACGCCTATGT  
AACCCGCACCAACCTTTTTTATTATGGGGGCAGTTCCTCGCCTTCTTACTGTAGGGCATCC  
ATATTGTACATTAACATTTGGTACCCAAGGAAAGCGTTCCACTATTCCCAAGGTGTCTGG  
GTATCAGTACCGGTGTTTCGTGTGAAGCTCCCTGACCCTAATAAGTTTGCTTTACCTGA  
TGGTACCTTATATAACCCAGACACCGAACGCATGGTATGGGCTTGACGGGGCATTGAGGT  
AGGCCGCGGACAGCCTTTGGGCGTAGGTACTAGTGGTCACCCATTATATAATCGCTTGA  
TGATACAGAAAACTGCTTATTTGGCTGCTGCCAGTGAGGACAGTCGTGACAATATTTT  
AGTTGATTATAAGCAAACATTTATTAATTATTGGTTGCAAGCCCCCATTTGGGGAGCA  
CTGGGCCCCGGGTACCTTTTGTGCTAATGTTGCTCCAGCACAAAACGAATGCCCCCCTT  
GGAGTTTTAAAAATACAACATTGAGGATGGGGACATGGTGGAACTGGCTATGGGGCCAT  
TGATTTTTAAGGCCCTGCAGGAAAATAAATCGGAGGTGCCCTTGATATTTGCAATACCAC  
CTGTAAGTATCCAGATTATTTACAAATGGCTGCTGAGCCATATGGGGATTGCATGTTTTT  
TTGTCTACGTCGGGAGCAAATGTTTGCAAGGCACTTTTTTAATAGACATGGCACTATGGG  
CGAGGCCCTTACCTGCAGACTTATATATGAAGGTGCTGCAGGCAGTGACAGAATAACCCC  
CGGGAGTTATATTTATGCCCTTACACCTAGTGGGTCTATGGTATCCTCTGATTCCCAGCT  
GTTTAATAAGCCTTATTTGGCTACAACGGGCACAGGGCCATAATAATGGCATTTGTTGGTT  
TAATGAAATGTTTGTTACAGTGGTGGATACTACCAGAAGCACCAATTTTACTATTTGCAC  
AGCTACATCTGCTGCTGCAGAATACAAGGCCTCTAACTTTAAGGAATTTCTGCGCCATAC  
AGAGGAATATGATTTGCAGTTTATTTTCCAATTATGTAAAATACAGTTAACACCAGAAAT  
TATGGCCTACTTACATAATATGAACAAGGCACGTGTGGATGATTGGAATTTTGGTGTGTT  
GCCACCTCCTTCCACCAGTTTAGATGACACATATCGCTTTTTTACAGTCTCGGGCCATTAC  
CTGTCAAAAGGGTGCTGCTGCCCCCTGCGCCCAAAGAGGACCCTTATGCCGACATGTCATT  
TTGGACAGTTGACCTTAAGGACAAGTTGTCTACTGATTTAGATCAGTTTCCTTTGGGTG  
CAAGTTTTTTGTTGCAGTCTGGGTCCCGCACCCGGTCTTTTGTGTGTCCCGTAAGCGTCC  
TGCGTCTGCCAGGACCCCCACTACCTCTGCTAAGCGAAAACGTAAAAAATAGTAGTATGC  
TTGTTTGTGCTGTGTGCTTGTGTGTATGTATTTGCATTGTTTTGTGTTGTTGTATTATA  
TGTGCTTTGTATGTTGTGTTGTATTTATATGTGTATTGTATGCGTGCTGCCCTTTTGCCC  
CTACACTGTTGTTGTATATTTGTGGAATGTGTGTGTTGTGTATACATTATTAATTTGTG  
TGTCACACTATGTAGCATGTCCGGTGACCCCTGTGAGTAAGTGTGTGTGTGTTGTTTAT  
GTGTTTGTACGCCCTTGACACTTTGTATTTCCCTTACCCTCCTTGAGTAGTGCCCTCCAT  
TTTACATACCTCCATTTTAAACCGAAACGTTGCAGGACCGTTTTTCGGTCGCCCCGCTTTT  
CGGTTTCAATAGTGGCACATTGCCCACTGTACACAAAGCGTTTTTAAATCCTTAGGCAAC  
TCATTTCTGCATTGGCAGCATGCTCTGTTCCAAACCTGGGTGTGCCTGACACATTGTTG  
GCTTTCTAACTGTTTTGCACACAATTTATACATTTCACTTACTCATTTTGCAATAAAAC  
TGCTTTTAGGCACATTCTTTGTGCTGACTACTATGTGGTAATTGCTGGTTTGGCTTTTTT  
ACATGTTTACACGCCAACAAATATGTCATGTAACTTAGGCAAGCTTTGTGCAACCTGT  
TAAACATACCAGGTGCACGTATGTGTAAGC

>gi|40804474|emb|AJ620205.1|\_HumanPapillomavirus\_type\_43\_complete\_genome  
CTAACAAATTATTATACTTTAGTTTAAGGTGGGACCGAAACGGTCCGACCGAAAGCGGT  
ACATATATAAACCAACCAAAAAACCATAGCTTGTGGGGCATAATGACTGCACGTAGCTGCT  
CCCAAAACGCACGGACTATATTTGAGTTGTGTGATGAGTGTAACATAACTTTGCCTACTC  
TGCAAAATTGGGTGCATATTTTGCAAGAAAGTGGTTACTTACCACGGAAAGTATTATCGTTTG  
CATTTAGAGATTTAAAGGTTGTGTGGCGCGACGGATATCCGTTTGCTGCATGCTTGGCCT  
GTCTACAGTTTTCATGGAAAAATAAGTCAATATAGGCACCTTGACTACGCAGCATATGCAG

ATACTGTAGAAGAAGAACTAAGCAAACAGTGTTTGATTTGTGCATTAGATGCTGTAAGT  
GCCACAAGCCATTATCACCAGTGGAAAAAGTACAGCATATTGTGCAAAAGGCACAATTCT  
TTAAAATACATAGCGTGTGGAAAGGATACTGCCTACATTGCTGGAAATCATGCATGGAAA  
AAAGCCGACGATCAGAGACTATGTGCTAACTATGCAACCAGAACCTAGAAGCTTAACCTG  
TAACGAGCAATTAGACAGCTCAGACTCAGAGGATGAGCGTGAGCAACCCACGCAACAGGA  
CCAGCAAGTGAATCTACAAGTTTACAGAGTTGTAACAGAGTGCACATCCTGTCGTGTGT  
AATTTCGACTTGTGTGTCAGTGCTCTGACAGTGACATCAAGAAGCTAGAAGACCTGCTGTT  
GGGCACATTA AAAATTGTGTGCCCACTGTGTACCACCACAGCGGTGTGACTACCATGGCT  
GATAAAACAAGGTACAGAGGATGAGGGGTGGGATGCTCAGGCTGGTTTATAGTAGAGGCA  
ACAGTGGACAAAACAACAGAAAAACAATATATCGGAAGATGAGATTGAGGACGAGGAAGAG  
GAAGATAGTGGGTTTGATATGGTAGATTTTATTAATAATACATTAGAAGACAGTTGTACA  
GACCACAGCAGTGCGCAGGCTCTGTTAAATGCACAACAAGCGGATGCTGATGCTGCTATA  
GTGCAGGAGTTAAAACGAAAGTACATGAGTCCCTATGTAAGTCCTATACACTGTTTACAG  
GAATCTGTAGACAGAGATCTAAGTCCCAGGTTGCATGCAATAAAGATTGGAGGCGGACAA  
AAAGCAAAAAGGAGACTGTTTCACGTAACAGAGCAGCGGGATAGTACCAATGGCAATACT  
GAAGTGGAAAGCAAGAGAGACACAGGTAGAGGTGGAATATGGCGGACCGGAACGCCATATG  
GGGGCCAATAAAGGGTGTGGGAGGGGGAGTAGTAGTGTGGCGGAAGCTGTAGAGGTTGTA  
GAGGAAGCGGGTGCAACAAACAGTAGCCAAGACATAGGAGAGCCAAGCCACGCACGCGT  
ATAATAGAATTGTTTAAAGACAAGGATGTTACTGTAAAACGTTAGGTAAGTTTAAAGAA  
TTATTTGGTGTTGGGTTTAATGATTTAGTTAGTAAACAAATTTAGGAGTGACAAATCAACATGT  
ACCGACTGGGTATATAGTGTATTTGGTGTTAATCCATCCATATCAGAAGGATTTTCACATG  
TTATTA AAAAGAGCATACCTTATACCTACATACCCAGTGGGTGACCTGTAGATGGGGAATG  
GTATTGCTTGCATTATGTAGATATAAGGTTGCAAAAAATAGAAGTACAATAGTAAGACAG  
CTAGCACAAATGTTAAATGTGCCTGTACAACAAATTTTAATTCAACCACCAAAATTACAA  
AGTGCACCTGCAGCACTATTTTGGTTTAGGTC TAGTATGGGAAATGGTAGTGAGGTAACA  
GGCACAACACCAGAATGGATAAGCAGACAAACCATGCTGGAACATAGTTTTGCAGATACA  
CAGTTTAGTTTAACTGATATGGTGCAATGGGCATATGATAACGGATATACAGAGGAATAT  
GATATAGCATATTATTATGCACAAAGAGGTGATATAGATGCAAATGCAGCTGCATTTTTTA  
AAAAGTAACATGCAAGCTAGATATGTTAGGGATTGTGCATGCATGTGCAACATTACAAG  
TTAGCAGAAATGAAAAAATGTCAATGGCGGAGTGGATTAAACATAGAGGGGGGAAGTGT  
AATGATGGAGACTGGAAACCTATAGTAAAAATTTTTAAATATCAACATATAGACATTATA  
GCATTTCTAGGTGCTTTAAAAAATGGTTACATGGTATACCAAAAAAGAATTGCATTTGC  
ATAATAGGTCCGCCGGACACAGGCAAATCATGCTTTGGAATGAGTTTAATGAAATTTTTTA  
GGCGGTACCATATTATCATATGTAAATGCAAGCAGCCATTTTTTGGTTACAGCCATTAGTG  
GATGCAAAAGTGGCCATGTTAGATGATGTTACAGCAGGCTGTTGGACATACATGGATATG  
CATATGAGAAACCTATTAGATGGAAATCCTACAAGTATTGATAGAAAGCATAGAGCACTC  
ACAGTAATAAAGTGTCTCCATTATTGCTAACATCCAATTTGGATATTAGTACAGAAGAC  
AAGTATAAATATTTAAGAAGTAGAATTACAACATTTACATTTCCTAATACATTTCCATTT  
GATACTAATGGCAATGCCATTTATGAGTTAAATGATGAAAATTGGAACTCCTTTTTTTAAA  
AGGTTGGCATCAAGCTTAGAACTGGACACTGCAGAGGACGAAAATGGAGACACTAGCCAG  
GCGACTAGATATGTGCCAGGAACAGTTGTTAGAACTGTATGAAAAAGACAGCAAACTCT  
GGAGGACCATGTGTTGCATTGGAATATATACGTTATGAGTGTGCATTATATTATAAAGC  
AAGAGAGGCGGGCATTAACATCTAGGCCACCAGGTGGTGCCACAGCTAGAAGTATCAAG  
ACAAAAAGCATATTTGGCTATTGAATTACAAATGTCATTAGAAGCATTATTACAACTGA  
ATATAGCCTAGAACCGTGGACACTACAGGACACCAGTCAAGAAGTGTGGCTTACAGAACC  
ACAAAAATGCTTTAAAAAAGAGGACAGACAGTAGAAGTCAGATATGACTGCAATCCTGC  
AAATGCAATGCATTACACCCTATGGTCAGACATATATGTACCTTTGAATAGCACATGGCT  
AAAAGTTTCTGGCCATGTGGACTATGAAGGCCATCATACACAGTATGTGGGCAAAAGCA  
CTATTATGTAGAATTTCTATAAAGAGGCACGAACGTATGGGGAACTGGACAATGGAACGT  
TGTTATGGGCTCAAACGTATATATTCTCTGCATCTGTATCTAGTACCGTCAGTGAAGT  
ATCCTCTGTTGCGTCTACTGAATCTGACACCGGACCAGCGACCACCGTCCCAGATTCCAC  
GTGCACCCAAAAAGCAGACTGCCAGGAGCAAGCGCCGCTAGAAAAGCGAGTGCGATTTCGA  
CCCCCACACTACCCCGATCGCCGACTTGGCCAGAACTGTTGGAAGAGGGTCAGTGGACAG  
TTCAGACTCGCGACTCGTGCCTAAGCATACGGACCACCACCCTAGAGGGCACAACCGTGG  
AAGTCACACTACGCCTATAATACAGTTACAAGGTGAAGCAAATGCACTGAAATGTTTTAG

ATACAGATTGAATAAACATAAACATTTGTTTGCTGATGTGTCATCCACATGGCGATGGAC  
AACCGAGTGTAATAATAAACTAATACTGCATTAATTACATTAACATATATTAGTGAACA  
ACAGAGGGCTGACTTTTTGTCTCGTGTTAAAATACCTATAACTATTAAACAGTGCCTGGG  
AGCATTAACAATGATGTAAATCATGTATGTATGTATATTTGTATAGAGGAACTGTA  
ACTGTGATAAAAGGGGGGGTATTGTACCCCAACCACACAACCAGCCAACCTGCTGCTATT  
ATTGTTTATAGATGACAAGCTTGGCATATTAACACTTAACATTTTTATTGCTTCTTGC  
TGTATTGGTGTGCGCATGGGTAACGGACAACGTGGTGTGGGCTTCTGTGCTTGCATGTGC  
TTCTATCTTTTATTTTTTGTCTTGGGGCGTCCTTACATCACCTATTAACGTTTTTATATT  
GGCGTTGTTAGTGTGGTATTTGCCAGCCCTTTTATTGCATTGGTATATTATATCTGCTAT  
TGCATAACAGTAAATATGTTAACCTGTACATTTGAAGATGGTGATACATGGATGTTTTTA  
TGGTTACTTGTAACAGTTATAACTGTATTAATATTGGTGTAGCGTTTCATTACAGAACA  
CTTAAGTTGCATCAGTCCTCCAGCAAATAAACAAATCCTTTATATAATCACTTGTAACAT  
GGTGTCTCATACATAAAAGGCGCAAACGGGCATCAGCTACACAATTATATCAAACATG  
CAAGGCTGCTGGCACATGTCCCTCGGATGTAATTAATAAGGTTGAGCATACTACAATAGC  
AGATCAGATATTAATGAGGCGAGCATGGGAGTGTATTTGGAGGGTTGGGTATTGGAAC  
AGGCTCAGGAAGTGGAGGCAGAACAGGCTATGTCCCTCTAACAAACAGGTCGTACGGGTAT  
TGTCCCTAAGGTGACTGCAGAGCCTGGAGTAGTGTACAGTCCTCCTATTGTTGTAGAATC  
TGTTGCTCCAAGTATCCTTCTATTGTGTCTTAATTGAGGAATCAAGCATAATTTCAGTC  
CGGGGCTCCTATTACCAATATTCCATCACATGGTGGCTTTGAGGTAACCTCCTCTGGATC  
AGAGGTTCCCTGCAATTTTAGATGTTTTCCCATCTACTTCAGTGCATATTACTACATCTAC  
ACATTTAAATCCTGCATTTTACTGATCCTACTATTGTACAGCCAACCCCCCAGTTGAGGC  
TGGGGGACGTATTATAATATCTCACTCCACTGTTACTGCTGATAGTGTGAACAAATTCC  
TATGGATACGTTTGTATACACAGCGATCCTACCCTAGCACACCTATTCCAGGCCTGC  
CCCACGACCTCGTTTTGGGCCTGTACAGTAAGGCATTGCAGCAGGTGGAAATTGTTGACCC  
TACATTTTTGTCTCGCCACAACGTTTAATTACATATGACAATCCTGTATTGAGGATCC  
TAATGCTACATTAACATTTGAACAGCCTACAGTACATGAAGCTCCTGATTCTAGGTTTAT  
GGATATAGTTACTTTACATAGACCTGCATTAACATCCCGACGAGGTATAGTTAGATTTAG  
TAGGGTGGGTGCGCGCGGTACTATGTATACTCGCAGTGGTATACGTATTGGGGTCTGTGT  
ACACTTTTTTACAGATATTAGTTCCATACCCACAGAGGAATCAATAGAATTGCAGCCCCCT  
AGGACGTTCCAGTCCTTTTCTACTGTTTCTGATACTAGTGATTTATATGATATATATGC  
AGATGAGAATCTGTTAAATAATGATATTAGTTTTACTGACACACACGTGTCCCTACAGAA  
TTCTACTAAGGTTGTTAATACAGCTGTGCCACTTGCAACTGTACCTGATATTTATGCACA  
AACGGGGCCTGACATAAGCTTTTCTACTATTCCTATTTCATTTCCATATATTCCTGTGTC  
CCCATCTATTTCCCCTCAGTCTGTTTCCATACATGGCACTGATTTTTTATTGTCATCCTTC  
ATTGTGGCATTTGGGCAAACGCCGTAAACGCTTTTTCATATTTTTTTTACAGATAACTATGT  
GGCGGCTTAATGACAACAAGGTTTACCTGCCTCCTCCAGGGCCTATAGCATCTATTGTGA  
GCACAGATGAATATGTGCAACGCACCAACTTATTTTATTATGCTGGCAGTTCACGTTTGC  
TTGCAGTGGGTCACCCATATTTCCCCCTTAAAAATTCCCTCTGGTAAAAATAACTGTACCTA  
AGGTTTCTGGTTATCAATACAGAGTATTTAGAGTTAAATTGCCTGACCCTAATAAATTTG  
GCTTTTCAGAAACAACACTGGTTACATCAGACACTCAGCGTTTAGTCTGGGGATGCGTAG  
GAGTTGAAATTTGGTAGAGGACAACCTTTAGGTGTTGGAATAAGTGGCCATCCGTATTTAA  
ATAAGTATGATGACACTGAAAACCCGTCTGGGTATGGCACATCGCCGGGACAAGATAACA  
GAGAAAAATGTAGCAATGGATTATAAAACAAACACAGCTGTGTATTGTTGGCTGTACACCTC  
CTATGGGTGAATATTGGGGTCAGGGTGTGCCTTGCAACGCATCAGGTGTTACCCAAGGTG  
ATTGTCTGTAAATAGAATTAAAAAGTGAAGTTATACAGGATGGTGACATGGTAGATACAG  
GATTTGGTGCAATGGATTTTGTCTCCCTACAGGCCAGTAAAAGTGATGTACCTTAGACC  
TGGTTAATACTAAAAGTAAATATCCTGATTATTTGGGAATGGCAGCAGAGCCTTATGGGA  
ATAGTTTGTTTTTTTTTTCTACGCCGGGAACAAATGTTCCCTTAGACATTTTTTTAATAAAG  
CTGGTAAAACCTGGCGACGTTGTGCCTTCCGATATGTATATTGCTGGCTCTAATACCAGGT  
CCAAAATTGCAGATAGTATATATTTTTCTACACCCAGTGGGTCTTTGGTTACTTCTGATT  
CTCAATTGTTTAAACAAACCCTTATGGATACAAAAGGCCAGGGACATAATAATGGCATTT  
GTTTTGGGAATCAGTTGTTTGTACAGTGGTAGATACCACTCGTAGTACAACTTAACGT  
TATGTGCCTCTACTGACCCTACTGTGCCAGTACATATGACAATGCAAGTTTAAGGAAT  
ACCTGCGGCATGTGGAAGAATATGATCTGCAGTTTATATTTCAATTATGCATAATAACGC  
TAAACCCAGAGGTTATGACATATATTCATACTATGGATCCCACATTATTAGAGGACTGGA



ATTTTGGTGTGTCCCCACCTGCCTCTGCTTCTTTGGAAGATACTTATCGCTTTTTGTCTA  
ACAAGGCCATTGCATGTCAAAAAAATGCTCCCCCAAAGAACGGGAGGATCCCTATAAAA  
AGTATACATTTTGGGATATAAATCTTACAGAAAAGTTTTCTGCACAACCTACCCAGTTTC  
CCTTAGGGCGCAAATTTGTTATGCAGGCGGGTTTGCCTCCCAAACCTAAATTAAAAACTG  
TAAAGCGTTCTGCACCATCCTCCTCTACGTCTGCCCCTGCCTCTAAACGCAAAAAAATA  
AGCGATAACATATGTGTGTGTGTGTGTGTGTGTGTGTGTGTGTGTGTGTGTGTGTGT  
GTATGGTGTGTGTGTGTGTGTGTGTGTGTGTGTGTGTGTGTGTGTGTGTGTGTGTGT  
GTTGCAATGACAAATAGAAATGTTTGTGTGTATATGTGTATGTTGTATACATTAATAAAG  
ATGTTTGTGTGTGGTGTGGTGTGTGTGTGTGTGTGTGTGTGTGTGTGTGTGTGTGTGT  
TGTTTATTACCTTTTCTTTTCTGTGTGTGTGTGTGTGTGTGTGTGTGTGTGTGTGTGT  
TTTAGTAATGGTTACTGTTGTGGGTATGTAAAATGGCGTCTGAACGTCTTCCATTTTGT  
TTTGCAACCGATTTCGGTCGCGTTTGGCACCCCTATTTCATGGTGTGAGCATAATTGCAA  
AGGTTACTGTGCCCCGCCAAAATATGTTGGCACACTTTTATCCCTTTGGCGTCAAGGT  
GTGGCTTCTACGCCCACATTCCACTTTTACTATACAAATGTACCTTTTCACTCTATGT  
TTTATTACCTTTTATTCTTTTGTGACATATATTTGTTTTTTCATAGTTACTAATAGCTT  
TTTTGGCTCACATAAATGAACTGCAGTCATAAAATATGTATGAGTAAGTGTGTGGTAAG  
CACACCTGCAGACCGAAACCGGTCTTACACACCTTACATTCTTTGTGGTTATTA

>gi|14475578|emb|AJ400628.2|\_HumanPapillomavirus\_type\_87\_(candidate)\_complete\_g  
enome

CAACATCATCTATTTTTAAAAATAAGGAGGACCGAAAACGGTACGACCGAAAAGGATACA  
TATAAAGGGGCCACAGGGCGGTGTATGTGCAACGGGACAGTCATGCCCAACGGACGCT  
ACACACCTACCAATATCTTTTGTCTATGTCAGGAATATGAGGTGGACTTTGACAACCTAA  
GGCTGCTTTGCATTTTTTGAAGGAAGAATTAACAGAAAGCGAATTGCTGGCGTTTGCAT  
TAAGGGAATTATTGCTGGTGTGGAGATTTGGATTTCCTTATGGAGTGTGCCTACAATGCC  
TATTTCAGAGAAGCCAAGAAACGTGAGCTTCGTCCTGGGAGTACTCCAGCTACGGACCCA  
CAGTAGAAGAAGAAACAGGTGTAGCATTGGCACTTCAAAATATAAGGTGCCATGCATGCT  
GCAAAACATTGTGCTGGCCCCGAGAAGGAGCATATGATACACGGAATCTGCCTTCCACA  
AAATAGCTGGGAAGTGGACAGGAAAGTGCAGCAACTGTAGGGCAATATGCATGGCCAGAC  
GCCGACTATAAAAGATATTATTATATCTGAAATTCCAGATGTAGTTAACCTACATTGTGA  
CGAGCAATTGTTAGACAGCTCAGAGGAGGAGGACAATAGGGATTGTGTGCGTGACCAACC  
TGCAGAACCAGCACAGCTGGCCCATAGGGTGTAAACAGAGTGTGGGTGTGCAGACGTCC  
AGTTAGGCTGGTGGTGTCTTTGTGGAGCTGGAGACCTAAGGCAGCTACAGCAGCTTATGGT  
GGACGCGGTGGCCATTGTGTGTCTGTTGTGTGCATAACATGGCAGAGTCACCTGAAGGTA  
CAGATGAGGGACCGGGGGGGGGCAGGGAGGTGGTTTGTGGTGGAAAGCCATGGTACATCA  
CACAGCTAATACAGATGTGTCCAGTGATGAGGACGAATCAGTAAGTGATAGGGGAGAGGA  
TATGGTAGACTTTATAGATAATACAAGACATCCAGGGGACGGACAGGAAGTGCCGTTAGA  
CCTTTATGTTCAACAAACAATGCAGGATGACGCTGCAACGGTGCATGCCCTAAAACGAAA  
GTATATTGGAAGCCCGGCAGCTAGATCCTGTGCATCCTGCGTGGATAATGAACTAAGCCC  
ACGTTTGGATGCAATATGTTTACAGAAAAGGCACGACAAAGCCAGGAGAAGGTTGTTTGA  
ACAAGACAGTGGGTATGGCAATACGCAGGTGGATATTGGAACATCCGAAAGCCAGGTACA  
AGGGGAACAAAACAACAGTGGGGGGGGCGACGTAACACAAGACGTGGTAGAGGAGGAACG  
AGGGGGGGGGGATGGGGAACCGCAACCACATGTAAATACAGAGCACATACAGCAGACAGA  
GGGCACACCAGACGCATTAGACCTGTACAGGTTAGTAACCTACGGGTAAAGCTACTAGC  
AAAGTTTAAGGAACTATTTGGGTATCATTTATGGATTAGTAAGACAATTTAAAAGTAA  
TAAGTCAACGTGTGGCGACTGGGTAGTAGGGGCGTTTGGGTGTATTATGCAGTTGCAGA  
AGCAGCGAAAACATTGCTGCAGCCTGTGTGTGATTATGCACACATACAAACATTAACAAG  
TGAGTGGGGAATGGTAATGCTGCTACTATTACGGTTTAAAGTGAACAAAAGTAGGGAAAC  
AGTGGCACACTGTATAGGCACTATATTAAATATTCCAGAGAAACGTATGCTAATAGAACC  
GCCAAAGCAACGTATAGGGCCATGTGCACCTATATTGGTACAAAACAGCCATGAGCAATGC  
AAGTGAGGTGTTTGGGGAACCGCCGACTGATAGTTAGACAAACAGTAATAGGACATGC  
AATGGGAGAAACACAATTTAGCTTATCAGTACTGGTGCAGTGGGCGTATGACAATGAAAT  
AACTGAGGAAAAGTGAGCTAGCCTATGAATATGCACAACCTGGGAAATGAGGATGCAATGC  
TGCTGCATTTTTAGCAAGTAATTGTACAGGCAAGATATATTAAAGATGCAATTACAATGGT  
AAGACATTACAGACGTGCAGAACAGGCACGTATGACCATGTCACAATGGATTGCATACAG  
GGGGCGCAAGGTGGCTGACACAGGCGACTGGAGACATATAGTAAAACCTGCTAAGATATCA

AGGAATAGAATTTATTAGTTTTATGGAAGCGTTAAAGCACTTCCTAAAGGGAACCCCCAA  
AAAAAGCTGCCTAGTGTTTTTATGGACCTAGTGACACAGGGAAGTCAATGTTTTGCATGAG  
CCTATTAAAGTATCTAGGTGGAGCAGTAATATCCTTTGTAAATTCTACTAGCCATTTTTG  
GTTGTCGCCATTGGTAGACACCAAAATAGGGTTGCTGGACGATGCTACACAGCAGTGTG  
GGTATATATGGATACCTATTTACGAACAGTGTGGATGGCAATACCATGAGCATAGACAG  
AAAACATAAAACCCTACAACAGCTAAAATGCCACCATTAAATGATAACCACAAATGTAAA  
TATAGAGGCAGATGACAGTTTAAAGTATTTACGGAGCAGAATGGTGGTGTTCGGTTTTCT  
ACACAAGTGCCCACTAGACAGCAATGGGAGACCCAGTGTATAAATTAATAATGAAAATTG  
GAAATCCTTTTTTTCAAAGGTCGTGGGCACGATTAGACTTAACCCAGGAGGAGGAGGAGGA  
GGAGGCGGACAATGGATGCACTAGCCGCCCCGTTTAGATGCGTGCCAGGACAAGTTAATAG  
ACCTCTATGAAAAAGATAGCAACAAGCTTGAGGATCAATTATTGCATTGGCAGTACACGC  
GTCTGGAAAAAGCTATGTTATTTAAGGCAAGAGAAACAGGACTAACACATATAGGCCACC  
AGGTGGTGCCACCACCTTAGTGTAACAAAAGAAAAGGCCCGGCAAGCTATAACAGTGCATT  
TATCTCTACAAAGCCTAAATAACAGTGAATTTAGGCACGAGCCATGGACATTGCAGGACA  
CATCATTGGACATGTGGAATGTGTCCCCAAAGGGTGCTGGAAAAACAAGGACGTCCTA  
TCAGAGTAAAAATATGATGGTGAAGATGACAAAGAAATGGAATATGTCAGCTGGGGGTATA  
TATATATACAGTGTGCTAGCACTGATACATGGCTTAAGGTGCCTGGACAGATTAGCCACC  
AAGGGTTATATTATGAAGTGAAGGCTGTAAACGGTACTATGTTGACTTTGCAAAGGAGG  
CAAAACACTATGGGGCAAAAACATGTGGGAGGTGCATGTGGGAAGCACAAATTATTTACC  
ATACATCGCAATCTGTATCCAGTACTCAGGGAGGCGTGTGAGAAGTATCCACTGCTGCAA  
CTGCTGCAAAGTTATACCACACCACCACCGCGCCACCCTACCGCCACCAAGAAAGCCT  
CCCAGGTGCAGGCGCCGCTGTAAAGCGACAGCGACTTGAGGAGACTGCACCCAGCAGC  
CCGATTCTACACAGGACAAGCGACCATCCGTGGACAGTTGCTACACACGGACAAAACAATA  
ACCCTAAACAACACACAGTGGACACGGGACAACCTGTATCAGTAACGGTGCACCTGTCCTGC  
ACCTAAAAGGTGACCCAAACCGTCTTAAGTGCTTTAGATATAGGTTACAGCAATCAGTGC  
CCCAATTGTTTGATAAAGCATCGTCCACGTGGCGGTGGACCTGTGGGGGGACGGACGAAA  
AATACTCCTTTGTAACATTGTGGTACAAGGACACTGAACAACGCAACAGTTTTTGGCAC  
GTGTAAATATACCTAAAGGATTGTGGCTACACAGGGACATATGTCTATGTGTGTATAAA  
GCATTGTGCATAATACTGTATACATTGGTGTACCTGTATGTAACCTAGCTGTATAATACA  
TTTTGCATACCTGACATATACAGCACAAACCCTGGACCTTATTGTATGGGCCGTGCATGCA  
TGGTGTAAATGTGTTGCTGCTGCTAATTCTGTTTTGGCTTTCCCAACTATCTGCCTTTGTT  
GCTTTTCTTGTGTTTGTGTGTTTTATCTATTTAGGGTTGTGGTTTTTGTATATGCAGGTA  
CTGTGGTACATTGAAGTGTATATAAGTAAATCACACAACCAGCCAACCTACTGCTGCTACA  
TATCCTTGATACAGCCCCCTACCCTATACAGTATGTATCCATTACAGGTGCGGGGACCCCAA  
GGTGGATATGATATAGTATTGTTTGAGCGTGGAGATGTTGGTATATTGGCATTAAATTTTG  
TTACTGATTGCTATTATCTTAATTTTGTATACATACGCATTTTGCATTTATAATATTCT  
GTATTGTAATTTTGTATTGTTTGTAAATAAAGTGGTACCATGCCAAAATCCCGTCGCAAAC  
GTGCCTCTGCAACAGACCTGTACCGCACCTGCAAGGTTACAGGCACATGTCCCTGCAGATG  
TGGTTCTTAAGGTGGAGGGGGATACATTGGCTGATCGTATTCTTAAGTGGGCCAGCCTGG  
GTGTCTTCTTCGGTGGCCTTGGCATTGGCACCTCATCGGGCACTGGTGGCCGCACCTGGCT  
ATATACCCTTGGGAACACGGCCCCCAACCGTGGTTGATGTAGGGCCTACCGCCCCGCCAC  
CTGTGGTTATTGAACCTGTGGGGGCGCGGATCCATCCATTGTTACATTGGTGGAGGATT  
CTAGTGTTATTAATCTGCGGGCCCCGTTTCCCTAATTTTACTGGAACAGGTGGGTTTGAGG  
TTACCACCTCTTCTACCACCACCCCTGCAGTATTGGATATTACTCCCTCCGGGTCGTCTG  
TGCAAGTTAGTAGTACAAGTTATATTAATCCCTTATTTACTGAACCTTCTATTATAGAGG  
TTCCCCAGGCTGGTGACATTGCTGGCCATGTATTGTCTGGTACAGCTACCTCGGGTACCC  
ATACGTTTGAGGAAATTCCTATGCAAACCTTTGCTGTACAAGGGGGGACAGGTCAGGAAC  
CCATAAGCAGTACACCTATTCTGGGGTGCGGCGCCTTGCAGGGCCTCGCTTAAATTTGT  
ACAGCCGTGTACCCAGAGGTTCCCTGTACTGACTCTGCATTTTTTATCACGTCCCTGAAT  
CATTTGTTACCTTTTCATAACCCCTATGTATGACCCAGAAGAACTATTATATTGAGCATC  
CTAGTTTGCATGCCCCCTCCTGATCCAGACTTTCTGGATATTGTTACCTTGCATAGGCCTG  
CCTTAACAGCACGTAGGTGAGGTGTTAGATATAGTCGTATAGGTCAAAGGGCATCTATGC  
GCACTCGCAGTGGCAAACATATTGGGGCCCCGTGTACATTTTTTATCATGACATAAGTCCTA  
TTGCACCGGCGGACAGTATTGAAGTGCAGCCCTTGGTGTCTCCTCCACTGCCCCCAGTGATG  
ATACTTTATATGATATATATGCTGATGATACCCATTTGTCCTCTGTGTTACGGGGGCCCT

CTCTTCCATCATTGCACAGCTCTACCCCTACAGCATCTACAAAGGTGTCGGCCACGTCCA  
TACTATCCTCTTCCCATTATGACAATGTAACAGTCCCCTTGTCTGCAACAGATGTGCCCC  
TATATACAGGTCCCAGATATTGATCATTCCATGGCCCCGTCCCCACGCCCTTTGTTCCCTG  
TGGTTCCTAGCACTGCCCCATATTCTGTATATATACAGGGGTCTGATTATTATTTACTAC  
CTAATTATATATTTTTTTCCTAAGCGACGTAAACGTGTGCCCTATTCTTTTTTCAGATGGCT  
TTGTGGCGGCCCTGGTGATGGCAAGGTTTACCTGCCCCCAACTCCCGTGTCTAAGGTTATC  
AGCACGGATCGTTATGTATCCCGCACCAACTTATTTTTATTATGGTGGCAGTTCTCGCCTG  
CTTACTGTGGGTACACCTTACTATCCAGTTACTGTTACCACCCCTGGTCAGAACAAGAAA  
TCCAATATTCCAAAGGTGTCTGGCTATCAGTACAGGGTGTTTCGGGTGCGTTTGCCTGAC  
CCTAATAAAATTTGGCCTTCTTGACGCCCAGTTATATAATCCTGACACCGAGCGCCTGGTC  
TGGGCCTGTAGGGGTCTAGAGGTGGGCCGTGGCCAGCCGCTCGGTGTTGGTACAAGTGGC  
CATCCGTTATACAATAGACTGGATGACACAGAAAACACCCCTTTCTTACTACTGAAAAC  
ACTGATAGTAGGGACAATGTGTCTGTGGACTACAAGCAAACCCAGTTGTTAATTGTAGGC  
TGTAAGCCCTCTATAGGGGAGCATTGGAGTAAGGGTACTGTTTGTGCCAATGTACAGCCC  
AAGACAGGGGATTGTCCACCATTGCAATTTACTAATTCTACTATTTCAGGATGGCGACATG  
GTTGAGGCAGGTTATGGTGCTATTGATTTGCAAAAGTTACAGGAAAACAAGTCCGAGGTG  
CCTTTAGACATTTGTACTACTGTTTGCAAGTATCCTGACTATTTGCAAAATGGCTGCTGAG  
CCCTATGGCGATTGCATGTTCTTTTGTCTTAGGAGGGAGCAAATGTTTGCCCGCCACTAT  
TTTAAACAGGCAGGGTACTATGGGCGAGGAGTCCCTGACACCTATTTTTTTGAAGGGGGCG  
TCGTCTGGCCCTTAGGGCCTCTTTAAGCAGTTATGTGTATGCCCCCTACCCCTAGTGGCTCT  
ATGGTATCGTCTGATTCCAGTTGTTTAAACAAACCCCTATTGGCTGCAGCGGGCCAGGGC  
CACAATAATGGTATTTTGCTGGTTTAAATCAGTTGTTTGTAACGGTTGTTGATACTACTCGC  
AGTACCAATTTTACTATTAGTGCTGCCACTCAAACAACCACTGAATATGACCCCACAAAG  
TTTTAAGGAATATTTAAGGCATGTGGAGGAATATGATTTACAGTTTATTTTTCAATTGTGT  
AAGGTCCGCTCTGACCCCTGAAGTAATGGCCTATTTACATACTATGAATGAATCCCTTTTG  
GATGAGTGGAATTTTGGGGTTGTGCCCCCTCCTTCCACTAGTTTAGATGATACATACCGA  
TACCTTCAGTCCCGTGCCATTACATGTCAAAAGGGGTCTGCAGCCACAAAGCCTAAGGAG  
GATCCATATACTGGCATGCTGTTTTGGGAGGTAGATTTAAAAGACAAGTTGTCCACTGAT  
TTAGACCAATTTCCCTTTGGGCCGCAAGTTTTTGTGTCAGTCCGCCCCCTAGGGTGTCCCGT  
GTGTCCCGCAAGCGTCCCGCCTCTACCTCTACTGCCTCTACCTCTAAACGTCGCAAAGCC  
AAAAAGTAGTGTGGTGTGTGTGCTATATTGTATGTCTGTTTGGTATGTACTTTTTATGTT  
TTGTATGTATTGTGTTTGTGTTTGTATATGCTTTGTATGTATTGTGCAGTGACCTGTATGTG  
CCCCTGTCTTGTGTCCTTGTACTGTTGTGTATGTTTGTGGTGTGTATGTATTTATGGAA  
TGTGTGTTATGTTATGGATCAATAAATTGTGTGTCAATTGTGGGTACATGTCCGGCTGCA  
CCCTGTGAGTAAGTATGCACCTTGACACACACCTTGTACACCACAACATATCCTCCATTTT  
CTGCAAAATAGTTTGTATCTCTACCTCCATTTTGTGAGCGACCGAATTCGGTCTCCCGCCT  
TTTCGGTCTGTGTTATGGCGCTATTCCAGTACAACCTAATCCTTTGGCAACCCTACATCCT  
GCCTAGGCAGCTGCAAACGTTCCACACCTAGGTGTGTCTGACATCTCTTTCCTATATAA  
TAAATATATTATGTTGTAGTTTATAGGTTTACTTACTCATCTTCAATAAATATGCTTTTA  
GGCAATACTTTGGCTTACAACCTTTCCCTTAAGTGCATAGTTGGCTGCCTTAGTACATTGT  
ACTGCCAGGTTTCACTTCCATAAACTGCATACTTGTAACTATCCTGCCAAGTTTCTGT  
CTTATAAACCTTAAACAATACTTATGTAAACACACAAATCGGTTGCTGTATTACTCATA  
CCTTGTCATTATACTTAA

>gi|39932599|gb|AY395706.1|\_HumanPapillomavirus\_type\_62\_isolate\_Qv18091,\_complete\_genome

ATGACTGCAGGGCCAGCAAGGCCACGAACCTGTTTTTGCTGTGTAAGGAGTATGATGTG  
GACCTGGACGACCTGCACCTAACCTGCATATTTTGCAAAACAGACCTGTCCGCCGGTGAA  
CTGCTGTCCCTTTGCAATACGGGAGCTACAGTGGTGCGGCGAAAGGACTGGCCATTTGGA  
GTAGTCGCAGCATGCCATTATTGAGAGAGATTAAAGTAAGAGAGCTACGGCGGTGGCAGCAC  
TCATGCTTTGGAATAACAGTAGAAGAGGAAACAGGCAGTCCGCTTGCACAAATATATATT  
AGATGCCATGCAATGCTGTATGCCATTAACCTGTGAGGAAAAGGAGTATCAGGTAGAGAGG  
GGAGTGCACCTTCCACAAAATAGCAGGAGTGTGGACAGGACGGTACCGCAATTGTAGAGGA  
GTATGCACGGCCAGGCAGCAACTATAAAGGACATTGTCTTACAAGAGCGTCCCGATGTGG  
TTGACCTACATTGCCACGAGCAATTGTTAGACAGCTCAGAGGAAGAGGTGGATGATAGGG  
ACAGTGCTGAGCAACCTGTAGAACGGGCACAGCAGGCCCATAGGGTGGTTACTACGTGTG

GTATTTGCAACTGTTTAGTTAGGTTGGTGGTGTTAAGTGGAGACGCAGAACTCAGACGGC  
TGCAACAACACTACTGACGGATGCACTGGAGATAGTGTGTCCCGGCTGCGCATAAGTGACAT  
GGCCGATGCGGAAGGTACCAATGGCGGGGATGGGATAGATGGTACAAACGGGGCCGGAGG  
GTGGTTTATGGTGAAGTCATAGTAGAACAAACAACAGGGTACCAGGTGTCCAGTGATGA  
AGATGAAAACAGTATAGACACAGGGGAAGATCTGGTAGACTTTATAGACAATACCAGACA  
TCCCGGGGACGGGCAGGAAGTGCCGTTAGAATTGTTTGTTCACAAAATGCACGGGATGA  
CGCTGCAGCTGTGCAGGCACTAAAACGAAAAGTATACATATAGTCCTGCAACAAGCTCATG  
TGTATCCTGGGTGGACTGTGAATTGAGCCCCGCGTTGAACGCAATAAGCCTAGACCGGGG  
ACACGAAAAGGGCCAGAAGGAGGTTGTTTGACCAAGACAGTGGGTATGGCCATACGCAGGT  
GGATACGGGACCATCCGAAGGACAGGTACCGGGGGATACACAACAAAACAGATGAAAACGT  
AGAGCAGGAAGTGCAAGAGGATGTAAGGGGGGGGGGGGATGGGGAACCGGAACGCAGTGT  
AGATGTGCAACAATCGCAGGAACGCACAGCAAGTATTGTAGAGCTGTTAAAAACCAGTAA  
CCTGCGAGCAACACTGCTAAGTAAGTTTAAAGGAGCTGTATGGGCTGGCATTTGGAGAGCT  
GGTAAGACAATTTAAAAGTGATAAATCAGTGTGTGGGGACTGGGTTGTATGTGCCTTTGG  
TGTATACCATGCAGTGGCAGAGGCTATTAACCATTAATACAGCCTGTGTGCCTATATGC  
CCATATACAAAGCCAAACCTGTTTCGTGGGGTATGGTAATATTAATGCTTATTAGATTTAA  
ATGTAGTAAAAGCAGGGAAACAGTGGCCAAATGCATTGGCACATTGCTAAATGTGCCTGA  
CAAGCAAATGTTAATTGAACCACCAAAAATTAGAAGCGCGCCCTGCGCACTATATTGGTT  
TAGGACGGCCATGGGGAATGCAAGTGAAATATTAGGGGAAACACCTGAGTGGATAACAAG  
ACAACACATGTGTGGGATGCAATGCAAGAAACACAATTTAGCCTATCAGTGCTTGTACA  
GTGGGCATATGATAATGATATAGTGGACGAAAAGTGACCTAGCATATCAATACGCATTGCT  
GGGCAATGACGACCCCAATGCAGCAGCCTTTTTTAGCAAGCAACTGCCAAGCAAAGTATAT  
AAAGGATGCAATTACAATGTGTAAATATTATAAACGGGCAGAACAAAAACGTATGTCTAT  
GGCACAGTGGATAGCACATAGAAGCCAAAAGGTAGCTGATACAGGGGACTGGAGACCTAT  
AGTACGGTTTTTTAAGGTATCAAAAAATAGAATTTGTGACATTTATGAGTGCCTAAAAAT  
GTTTTTAAAGAAATATACCCAAAAAAGCTGTATAGTAATATATGGGCCAAGTGATACAGG  
GAAATCATTGTTTTGCATGAGCCTATTAAAGTTTTTAGGAGGGGCAGTAATATCCTATGT  
GAATTCCACCAGCCACTTTTGGTTATCCCCCTAACAGATGCTAAAGTGGGGCTACTGGA  
CGATGCCACGTACCCATGCTGGGTATATATAGATACACATTTACGGAGCGTGCTGGATGG  
AAACCAAATAAGCATAGATAGAAAACATAAAAACCTGACACAGATACAATGTCCTCCCTT  
ATTTATTACCACCAATATAAATCCTTTGGAAGACGCAAATCTAAAATACCTGCATAGTAG  
AATTGCAGTATTCACCTTTATGTACAAGTGCCATTGGATGACAAGGGGGACCCAGTGTA  
TCAATTTAATAATGAAAACCTGGAATCCTTTTTTCAAAGTCTCTGGGCACAAATAGAGGG  
TACTCCTGAGGAGGAGGAGGAGGAGGAGGAGGAGGACAATGGCAACACTGGCCGACCGTT  
TAGATGCGTGCCAGGAGAACTAATAGACTTTTATGAAAAGGATAGCGACAAGCTTGATG  
ACCAAGTAAAACACTGGCAGTGCATACGCTGGAACATGCCATTTTATTTAAGGCAAGAC  
AAGCAGGACTAACACAGTTGGGCCACCAGGTGGTGCCAGCACTTAGTGTTACAAAAGGAA  
AAGCCACCTGGCAATAGAAGTGCATTTAGCATTGAAAAGTTTATATGCAAGTGTGTATA  
AAGACGAACCATGGACATTGCAAAGCACGTCTTTGGACATGTGGAACGCAAAGCCACAAA  
AATGCTGGAAGAAAAAAGGACGAACAGTTACAGTTAAATTTGATTGTGAGGACTCTAAAA  
TAATGGAGTATGTAAGCTGGGGGTACATATATGTGCAAACAGATACCGAGCAATGGTGTA  
AAGTACAAGGAAAGGTAAGCTATGAAGGGCTATACTACGAACTGGAGGGCCACAGACACT  
ACTATGTAGTATTTGCAGACGAGGCTAAAAAATATGGGGACCTTGACAAATGGGAGGTCC  
ATTGGGGGAACACAGTGATTTATGAACCATGCAACTCTGTATCTAGCACCCAGGACATTG  
TGCGAGAGATACCCCTGCTGAAACTACTAGACTGCTACACACCCCCGAACCCACCACCA  
GTGCCCAGCACGTGGGCACCACCCAGACCACCAAAGCCACCCCGGTGCCGACGCCGCCTT  
GTAAGCGACAGCGAGTCCACGGACACGGAGCGGAGCGGCAGCCACCGTTACAGAAGCGG  
ACAGCAGGGTCTGGACAATAACGAGTACGGGACCAACAGTTACCTGACAGCACAAAAG  
GACGACACGTGTGTGACGTTGGCGCTGCACCTGTAATACACCTGCGAGGTGAACCAAACA  
AATTAAAGTGCTTTAGATATGATTACGCGGGTCTGTACCACATTTATTTGTAAAGGCGT  
CCTCCACGTGGCATTGGACCTGTGGGGACGACACAGAAAAGGATGCATTTGTAAACATTTT  
GGTATGCCAATATAGAACAACGCACAGAATTCCTGCAACGTGTAACAATACCAAAAGGCA  
TACAAGCAATGCAAGGGTATATGACCATGTGTATGTAACCATATATATATGTACATATAT  
ATTACTGTAATCACATATAGCTACGTGTGTAAACAATATTGTTTGTGCTGTATCTGAGCC  
AGGTTTATACAGTAAGGTACCACACCTGCATTGTGCAAACGTTACCAATCCTGGATAACT

TGCTATGTTGTATATGTGGGTGGTGTGATGTGCTTTTGTGCTTATACTTTTCTGGCTTT  
CCCAGCTGTCTGCCCTAACTGCCTTTGCTGTGTTTTTTTTGTATTATATATGTGGGATTTG  
GGCTTTTGTATTTGCAGGTTATGTGGTACATTGGTATGCTGTAAACCACAACCAGCCAAC  
CACTGCTGCTATTGTGTATATACATAGTAGGTGTATTTGCAGGTGTTTAGTAGGTATGCA  
TCCTGTTATGGTACGCTCCTATGACGGGGGCACCGATATTGTGGTGTGGGGTCTGATGA  
CAGTGGTCTACTGTTTTTATTGTGCCTCATAGTGGCATTAACTGTTTGTCTATATACAA  
GTTGTTGCAATTGTAACCTACCAGCGTTGTACATACCATATTTCTGTTATTGTTGCTTTAT  
TTTTTATATTTTGTATGTTGCAATAAATACATTTATACATTGGCTTTCAATATGCCCAAG  
GTACTGCATCGTCGCAAGCGTGCATCTGCCACTGACCTTTATCGTACCTGCAAAGTATCA  
GGCAGCTGTCCCTTCTGATGTCAATCCCAAGGTGGAAGGCAATACATTGGCAGATAAAATA  
TTAAAGTGGGCCAGCCTTGGGGTATTTTTTGGGGGTCTAGGTATTGGTACGGCCTCTGGC  
ACGGGTGGGCGCACCGGTACATACCTATAGGGGGCCGGCCCCCGTCTGTGGTGGACATT  
GGCCCCGTGTCCCGCCCCCTGTGGTTATTGAACCTGTGGGCGCTACGGATCCATCTATT  
GTTACCTTGTGAGGATTCCAGTATTATTGAGGCCGGGGCTGTGCATCCCAATTTTACA  
GGGTCCCTCAGGGTTTGAGGTACCCACATCCTCTACCGCCACCCCTGCTGTTTTGGACATT  
TCCCTACCGGTACCACTGTACAGGTTAGCAGTACCAACTTTTTAAATCCTGCATATACT  
GAGCCATCCATTATAGACCCTCCCCAACTGGTGAGCTTTCGGGTCATGTGCTTACCAGT  
ACACCCACAGCTGGGTACACAGTTATGAGGAAATCCCTATGGTTACCTTTGCATCAAAT  
GCTGACAGGCTCTGAACCTATTAGTAGCACCCCATTTGCCTGGTGTGCGGCGCGTTGCA  
GGGCCCCCGCTTGGTTTTATACAAAGGCCACTCAGCAGGTGCCTGTGGCTGACCCTGCC  
TTTGTGTCTCGCTCCTGCATCCTTTGCAACATTCGACAATCCTATATATGACCCCGAGGAA  
ACTATTATTTTTGAGCACCCAGTATTTACACACCGCCTGATCCTGACTTTTTAGATATT  
GTGACTTTACACAGGCCTGCTTTAACCTCTCGCCAGGGCACTGTACGCCCTTAGTCGTGTT  
GGCCAGCGTGCGTCATTACGCACCCGTAGTGGTAAGCGTATTGGGGCCAGGGTACACTTT  
TACCATGACATCAGCCCTATACCCAGTACCACCCTGGTGACATTGAGTTGCAGCCCTTG  
CTGCCCTTCTGGCTCCTCCTCTGCTGATACATTGTATGATGTATATGCAGATGACCAGCAC  
CTTGATGCTGTATTACAGTCTGTGCCTTCTATGTCTTCCAGGCCCTTGGTTCCCAGCAAT  
GCCACCATATCTGCCACGTCTGTGGCATCCTCTCATACTAATGTCACTGTACCATTATCC  
ACTGGGTGTCCGTTCCAGCGTCCACTGGCCCTGATGTGGAATTGCCCTCAGTTTTCTGTA  
CCTGTGTCTGTGCTAACGCCTTCCTTCCCTGCAACTACCCCATATTCTATATATATTGTA  
GGTTCTGATTATTATTTGTTCCCTTCCTATATTTTTTTTCCCAAAAAAACATAAACGTCTT  
CACTATTTTTTTTACAGATGGCTATGTGGCGGCCTGGTGACGGCAAGGTATACCTGCCTCC  
CACTCCTGTTTCTAAGGTTCTCAGTACGGACACCTATGTTACACGCACCAACCTTTTTTA  
TTATGGGGGCAGCTCCCGCCTTCTTACTGTGGGACATCCATATTGTACTTTACAGGTTGG  
CCAGGGTAAACGGGCCACCATTCCTAAGGTGTCTGGGTATCAGTACAGGGTGTTCGTGT  
GAAATTACCAGACCCTAATAAATTTACTTTACCTGATGCAACCTTATATAATCCAGACAC  
GGAACGCATGGTATGGGCCTGCAGGGGCATTGAGGTGCGCCGTGGGCAGCCACTGGGTGT  
TGGCACCACTGGCCACCCGTTATATAACAGGTTGGATGATACAGAAAAATACCTCTTTGTT  
GGCTGCTGCTAATGATGACAGTCGGGACAATATCTCTGTGGATTATAAGCAGACCCAGTT  
GTTAATTGTGGGGTGTAAAGCCCCCTATAGGAGAGCACTGGACCAAAGGTACCTTATGCCC  
CAATGCTGCCCCGGCCCCACGGAATGCCCTCCGTTGGAATTTAAAAATACAACTATTCA  
GGATGGTGACATGGTAGAAACGGGCTATGGGGCTATTGATTTCAAAGCTTGCAGGAAAG  
TAAATCTGAGGTGCCCTTGATATATGCACCTCCACATGTAAATATCCTGACTATTTGCA  
AATGGCTGCAGAACCTTATGGCGATTGTATGTTTTTTTTGTTTGCGCCGTGAGCAAATGTT  
TGCCAGACATTTCTTTAACAGACATGGCACTATGGGCGAGGCCCTGCCCCACTGACCTGTA  
TATGAAAGGTACCCCAGGCAGTGACAGACAAATGCCGGGCAGTTACATTTATGCCCCCAC  
TCCTAGTGGGTCTATGGTGTCTGTGATTCTCAGTTGTTTAAATAAGCCATATTGGCTGCA  
GCGGGCGCAGGGCCATAAATAATGGTATTTGTTGGTTTAAATGAACCTGTTTGTACTGTGGT  
GGACTACTAGGAGTAAATAATTTTACTATTTGTACCGCCTCCACTGCTGCAGCAGAATA  
CAAGGCTACCAACTTTAGGGAATTTTTGCGACACACGGAGGAATTTGATTGCAATTTAT  
ATTTCAATTGTGCAAAATACAGTTAACCCCCGAAATCATGGCCTACCTGCATAATATGAA  
CAAGGACCTTTTGGATGACTGGAACCTTTGGGGTTTTTACCTCCCCCTTCCACTAGTTTGA  
TGAGACATATCACTATTTGCAGTCTCGGGCTATTACATGTCAAAAGGGGGCTGCTTCCCC  
GTCCCCCAAGGTGGACCCGTATGCGCAAAATGACATTTTGGACTGTGGATCTTAAGGACAA  
GTTGTCTACTGATTTGGACCAGTTTCCCTTTGGGGCGTAAGTTCTTGCTACAAGCAGGGTC

TCGCCCTCGGTCTGTTGCTGTGTCCCGTAAGCGTTCCTGCACCTACTAAGCAGTCCCCCTAC  
CTCTGCTAAACGAAAGCGCAGGAAGTAAGTGTATGTATGGTATGTGTGTGTGTGCTCTGT  
ACTGTGTTGTGCGCGTTTGTCTAGTGTGTTTGTGTTATATGTATGTATGGCCTGTTTGTATA  
TGTTGTGTATGTACCCCCCTCCTCCCGCTGTTGTATATGTATTTATGGAATGTATGTGTT  
GTTTGTGCATTATTAAACTGTGTGTCACTGTGCCTAATGTCCGGTGCGCCCTGTGAGTAA  
GTGTGTGTGTGTGTTTGTGTTGTACGCCTTGCACACTATGTTATTTCTTACCCTCCT  
TACATTAGTGCCTCCATTTTGTGTGTCTACATTTTGTATGACCCCATTTGTGTTACCCCGAC  
CGTTTTTCGGTTGCGCGCCTTTTTTGGTTTTCTATAGTGGCACACTGCCACACTGTACACAAA  
AGGTTTCTAATCCTTAGGCAACTCATTTCTGCGTTGGCAGCATACTGTGTTTTTACACCT  
GGGCGTGCTGACATATTCTTGGCGGCCTACAACCTGTTTTGCACACAAAATTATACAGTGC  
ACTTACTCATTTTGAATAAAACTGCTTTTAGGCACATTCTTTGTGCTGACTACCATGTC  
CTAATTGCTGGTTTGGCTTTTATAAACTTTCTACAAGCCAACCTATGTGTCTTATAAACTA  
AGCATGCTTTGTGCAAACCTGTTTTAACATACAAGGTGGGGCAATGTGTAAGTCTACTTT  
TCCCTTATAATAATTTACAACAATCATCTGTATAATAAAGTAGGGAGGTACCGAAAACGG  
TCGACCGGGAAGGTACATATAAAAGCAAACCGTGTGGTCAGCACAGTAGCA

>gi|4574720|gb|AF131950.1|\_Human\_papillomavirus\_candHPV85,\_complete\_genome

CTTATACTTTTTTATAATTTTATTACTGAAAAGGTGTAACCGAAAACGGTCATGACCGA  
AATCGGTGCATATATATAACCCAGCTTACAGTACATGTAATAGGATGGCTGAATTTGGCA  
ATCCAGCTACCCGACCCTACAACTACCAGACCTATGCAACACACTGGACACATCACTGC  
AAGATATAGAAAATAAGCTGTGTATATTGTATAAAGCGTCTGCAGCGAACAGAGGTATATG  
AATTTGCCCTTGTCTGATTTATTTGTAGTATATAGAGACGGTATACCATATGCAGCATGTC  
AGAAGTGTTTAATGTTTTATTCTAAAATAAGAGAACTAAGATATTATAGCGACTCTGTGT  
ATGGGGAAAACGTTAGAAAACTAACAATAAGCAATATATATGATATATTAATAAGGTGTT  
TACGGTGTCAAAAACCTTTATGTCCGGCAGAAAACTAAAACACCTTAATGAAAAACGAA  
GATTCCATAAAAATAGCAGGGAAATATAGAGGACAGTGTGCGCGGTGCATGACGCGTGCAC  
AAGAACAGCAAGGCAGCCGAGAGAAAACACAAGTATAAGGGTCGCTATGCATGGACCAA  
ACCTACTGTACATGACATTGTGTTAGATTTGGAACCATATAATGAAGTGCAAGAGGTTGA  
CCTGTATTGCTATGAGGAATTAACAACCTCAGAGGAAGAAATAGATGAACCAGATAATGC  
AATTAATCACCGACAACCACTACTAGCCAGACGAGAAGAACTACAGCGTCACACTATTTG  
CTGCGTGTGTTGTAAATGTGAGGCCAGTCTGCAGTTAGTGGTGGAAAGTTCAGCAGCCGA  
TCTACGAGATCTCCAGCAGCTGTTTTTGGGCACGCTATCATTTTTTGTGTCCACTGTGTGC  
AGTACTGCGGTAAGCTGCAATGGCCGACCTGAAGGTACAGATGGGGATGGGACGGGATG  
TAATGGTTGGTTTTTTTGTGCAGGCAATAGTAGACAAAAAACAGGTGACACCATATCAGA  
GGATGAGGACGAGGACGGGACAGATACAGGTTTCACTTGGTAGATTTTATTGACACTAG  
TAATACAAATTATATGCAGGCAGATAGAGAGGCAGCACAAAGCGCTATTACATGCACAGGA  
AGTAGAAACTGATACAAAGCTATTACATGCCTTAAAACGAAAGTATGGAGCACACAGCAC  
AGAAAACAGTCCATGTCGTGATACAGCAAGTATACATAGCAATTTAAGCTCACCATTACA  
AGAAATATCGTTAAATAGCTATAATAATACAGCTAAACGAAGGCTGTGTTTCAAGTGCCAGA  
CAGCGGCTATGGCAATACTCAAGTGGAACCTCTGCAGACTCAGGTAACCCCTAGATACAAA  
TGTGTTTGGGGATGGGAAAAATGGCGACGGTTTAAATAGTGAGGCATGTAGTACAGATAA  
TGAAATGGATATAGAAAATCAAAATCCAACTCACCAATGACACAAAATTGTGTCCTTATT  
AAAAGTAAATAATAAAAAAGCAGCAATATTGGCTAAATTTAAAGAAACATATGGATTGTC  
ATTTACAGATTTGGTACGAACATTTAAAAGTGATAAAACAACATGTACAGATTGGGTAGC  
CGCTATTTGTGGAGTAAATCCAAATATTGCAGAAGGATTTAAAACGTTAATACAACCATA  
TGTGTTATATGCACATATACAATGCATGGATTGTTTATGAGGAGTATTTATATTAGCTTT  
ATTAAGATATAAATGTGGCAAAAATAGACTAACTGTAGCTAAAGGACTAAGTACATTACT  
ACATGTACCAGATACCCATATGTTAATTGAGCCACCAAACTGCGTAGCAGTTGTGCAGC  
ACTATATTGGTATAGGACAGGAATATCAAAATATTAGTGAAGTAACAGGAGACACACCTGA  
GTGGATGACAAAGACAAACTATTATACAACATGGGTATAGATGACAGTGTATTTGACCTGTC  
AGAAATGATACAGTGGGCGTTTTGATAATGACTATATAGATGAAAGTGACATAGCATATGA  
ATATGCACAGTAGCTGATTGTAATAGTAATGCAGCAGCATTTTTTAAAAAGTAATTGTCA  
AGCTAAATACTTACGAGATTGTGCAGTTATGTGTAGACATTATAAAAAGGCACAACGAAA  
GCAAAATGAATATGTCACAATGGATTAGTTATAGATGTGACAAAATTGATGATGGAGGTGA  
TTGGAAAACCTATTGTACAATTTTTTAAGATTTCAAGGAATAGAGTTTATTACATTTTTTAAG  
AGCATTTAAAGACTTTTTTAAAGGAACACCAAAAAAAATTTGTATTGTTATATATGGACC

AGCAAATACAGGCAAATCATATTTTTGTATGAGTCTTATACAATTTTTACATGGTACAGT  
GTTGTCATTTGTAAATTCAAACAGCCATTTTTGGCTGGAACCGTTAACAGACACTAAGAT  
AGCTATGGTAGATGATGCAACACCAACATGCTGGTCCTATTTTGATAATTATATGAGAAA  
TGCATTAGATGGCAATCCAATAAGTATAGATAGAAAACATAAACATTTAATACAAATGAA  
GTGTCCACCAATGCTAATTACATCTAATACAAATCCTGCAACAGATGATAGATGGCCTTA  
TTTACGAAGTAGGGTAACAGTATTTACATTTCCACATACATTTCCATTTGATAGCAATGG  
CAATCCAGTGTATGACATAAATGATAAAAAATTGGAAATGTTTTTTTAAAAGGACGTGGTC  
CAGATTAGATTTGCACCAGGAAGAGGAGGATACAGAAAATGATGGATGCCCTATCCCAAC  
GTTTAAATGTGTTACAGGAAAAGATTCTAGAACATTACGAGACTGATAGTACAGACATAT  
GTGATCAAAATAGACTATTGGAAGTGTGTACGTCTGGAAAATGCAATATATTATGCAGCAA  
GGGAGCATGGTCTTAAACAATAAAACCACCACGTGGTACCAACATTTCAAAATTTCAAAAA  
GCAAAGCACATGAAGCAATTGAACTGCAGATGGCACTAGAGAGTCTTGCTAAATCAGAGT  
TTAAAAATGAACTGTGGACATTGCAAGATACGTGCCAAGAACTATATCAAAACACCTCCAC  
AACAGTGTTTTAAAAAACAGGGACAAACCGTCGAAGTACGGTATGATGGAGACAAAGACA  
ATACTATGCATTATACATCTTGGGACTATATATATTATGTAACAGAAGGTGATAAGTGGT  
GTAAAACCAAAGTTATGTGAATTATTGTGGATTGTATTATATAAAGGAGGGACAACAAA  
CATATTATGTACAGTTTAAATGTGATGCACAACAATATGGACAGAGCGGTAAATGGGAAG  
TGTGGTATAATGGTAAAAAAATTGAATGTGTAAATACCTGTGACAAAATAATACAATGTT  
CTGAATCTATGTACAGTACCTGTGACGAGACAGTATCCGCTACTGCAATTGCTAGAGAAT  
TACAACACCCACCACCGTATACCCGAGCCACCACCGTGTGCACCCAAAAGAGCGGGG  
GTTTCGGCGCCGACTAGAAACCCATTAGACACTTGTGGATTACAGAAAACAAGTGAAGTCG  
ACGGACTGTCCGTGGACCACCTCAACAACCCCTGCTTAGTGCACCTGCAGGCAACAACG  
GGTTCAGGAAGCACAAATAGTGGTGACACTACGCCTATAGTGCACCTAAAAGGTGATAAAA  
ATAGATTAAAGTGTTTTGCGATACAGGCTACAAAAGTTCCATAATTTATATACACAAATAT  
CATGTACGTGGCATTGGATAGGTGGTAAAGAAACAACAAGGACTGGTATATTAACATTGG  
CATATGCAAAATGAAACCCAAAGACAAAAATTTTTGGATGTTGTAAAAATACCTAATACTG  
TTAATGTATCCCTTGGTTATATGACATTGTAATAGGGGTATGTTAATTGCTGTATTTTTG  
TTGTGCTTTTGTGTGTGCCTATATGTGTGTTGCACTATTCCGCTTTTTCCTGCTACTAAT  
GTGTGTGCGCATGCTTGGCTACTTGTGTTTTTGTTAATAGTTTTTATTACTACCCCTTTT  
ACTGCATTTATTGTATATATATTTTTTTTTTATATTGCCAATGTTTTTATTGCATTTGCAC  
AGTGTACATACATTTGACTAAGTACTATATAACCTGTATTGTACAGGACATTACATTGGT  
AGTGTAAATACCTTTTTGTAAATAACATGGTATCCCATCGTGCTGCCCCGTCGAAAGCGTGC  
ATCTGCAACGGATTTGTATAAAACATGTAAACAATCGGGTACATGCCCTCCAGATGTTAT  
TAATAAGGTTGAAGGTACTACTCTTGAGATAAACTATTACAATGGACTAGTTTGGGAAT  
ATTTTTAGGAGGCCTTGAATAGGTACTGGTAGTGGCACAGGGGGGCGTACCGGCTATAT  
TCCATTGGGTGGCAGACCTAATACTGTTGTTGATGTGTCTCCTGCAAGGCCACCTGTTGT  
AATTGAATCTGTGGGCGCTTCAGATCCATCTATTGTTACATTAGTTGAAGAGTCCAGTAT  
TGTTACATCTGGAGCTCCTGTTCCCTACATTTACAGGCACATCTGGATTTGAAATTACATC  
CTCTGCAACAACCACCCCTGCAGTATTAGACATTACACCTGCTTCTGGGTCTGTGCAACT  
AAGTAGCACTAGTTTTACCAATCCTGCATTTACCGACCCTTCGGTTATTGAGGTTCCCTCA  
AACAGGGGAGGTGTCTGGAGATATTTTTATTACTACCCCTACATCTGGGACACATGGATA  
CGAGGAAATCCAATGCACACATTTGCAACACAGGGCAGAGGCACCGAACCTATTAGTAG  
TACCCCTATTCCCTGGTGTTAGGCGTGTGGCAGGACCTAGATTATATAGTCAAGCGTATCA  
ACAAGTTAAAAATACTAATTACAGACTTTATATCCCGTCCATCTACGTTGGTTACATTTAC  
CAATCCTGCATATGAGCCTATAGACACTACATTAACCTTTTCACCACAGGATGTTGTGCC  
TGATCCTGATTTTATGGATATTGTTTCGTTTACATAGGCCTGCCTTAACATCCAGACGTGG  
TACAGTTAGATTTAGTAGATTGGGTAAAAAACTAACTATGTCTACTCGCAGTGGTAAACA  
AATAGGTGCCCAGGTGCATTATTATCATGATATTAGTCCTATTTACATATAGGTGAAAG  
TATTGAAATGCAGCCTTTACTGACCTGATGACAGTTACTGCTGACACTAATGGCCTCTT  
TGACATTTATGCTGACACTGATATTGATAATAATGCCATGCTATATGATAGAAATATTTT  
TGATGTTACACAACCTACCACCTCAACTATATCTAGTGTATCCTCTCGTTATAGTAATAC  
TACTATTCCCTTAGCAACATCTTGGGATGTTCCCTGTTCATACAGGGCCTGACATGACATT  
ACCTACTACTATACCCAGTGGCCTAATATAGTACCTTTTACTGCCTAATAATACACATTC  
AGTTGTACTTCAGGGAACAACTATTATTTATGGCCTAATTATTATTTTATTTTCAAAAA  
ACGTAAACGTGTTCCCTATTTTCTTACAGATGGCTTTGTGGCGTTCTAGTGACAGCAAGG

TATACCTTCCACCACCTTCAGTGGCTAAAGTTGTCAACACAGACGATTATGTAACACGTA  
CCAGTACATTTTATCATGCTGGCAGCTCTAGGCTTCTAACC GTTGGACATCCATACTATA  
AAGTTACCTCAAATGGAGGCCGCAAGCAAGACATTCCTAAAGTGTCTGCCTATCAGTATC  
GAGTGTTCGGGTTACATTACCTGACCCTAATAAATTTGGTCTTCCAGACACTAATATAT  
ATAATCCTGAAACACAACGTTTAGTATGGGCCTGTGTTGGCATGGAGGTAGGTCGTGGGC  
AGCCTTTAGGTGTTAGCCTTAGTGGTCATCCCTTTTACAACAAATTGGATGACACAGAAA  
ATTCCCATGTTGCTACTTCTGTAGTTACACACGACACTAGAGATAATGTGTCAGTGGATT  
ATAAACAAACCAGTTATGTATTATTGGTTGTGTTCCCTGCTATTGGGGAACATTGGGCTA  
AGGGTACTGCCTGTAAGCCCCGGTGCTGTGCAAACAGGTGACTGTCCCTCCATTAGAACTAG  
TAAATACACCTATTGAGGATGGTGATATGATTGATACTGGCTATGGTGCTATGGACTTTA  
GTACTTTGCAGGATAATAAAAGTGAGGTTCCCTTAGACATTTGTCAATCTATTTGTAAT  
ATCCAGACTATTTGCAAATGTCTGCAGATGCATATGGGGACAGTATGTTTTTTTGTTTAC  
GACGCGAACAGTTATTTGCACGCCATTTTGGAACAGGGGAGGCACTATAGGAGATGCAG  
TACCGGAAACATTATATATAAAAGGTACTAATGATAGGGCAACACCTGGAAGCTGTATTT  
ATTCTCCATCACCTAGTGGGTCTATGGTATCTTCAGATGCACAAATGTTAATAAGCCTT  
ATTGGCTGCACAAAGCCCAGGGACAAAATAATGGCATTGTCTGGCACAACCAATTATTTA  
TAACTGTGGTAGACACAACACGTAGTACCAATCTTACCTTATCTACTGCACTACTAATC  
CAGTTCCATCTATATATGAACCTTCTAAATTTAAGGAATACACACGCCATGTAGAGGAAT  
ATGATTTACAATTTATATTTCAATTGTGTAAAATTACACTTACTACTGATGTTATGTCTT  
ATATACATAACATGGACTACTATTTTAGATAGTTGGAATTTTGGTGTTAGTCCTCCCC  
CATCTGCTAGCTTAGTAGATACATATAGGTTTTTACAGTCATCTGCCATTACATGTCAGA  
AGGATGTGGTTGTTCCACAAAAAAGGATCCATATGAAAAATTAAAGTTTTGGAATGTGG  
ATCTTAAAGAACATTTTTTCATCTGATTTAGATCAGTTTTCTTTTAGGACGTAAGTTTTTAT  
TACAGGCTGGGTTACGACCTAAACCCACCATAGGCCCTAGGAAACGTGTTGCTTCTACTT  
CTACTGCTACTAGGCCCTCCAAACGGAAACGTACTGCTAAATAATGTGTTGTGTATAATT  
GTGTTGTTTGTTTGTATATGTGTGTTCCCTTATATGTTGTGTGCATGTTTGTATGGTTA  
TGTGTATGTTTGTATCATGTGTAAGTAATGTGTGTATTGTATGTGTTAATAAAGTATGT  
GTGTTAGTTTCGTGTGTGTTGCACCCAAATGAGTAAGAGACTGTCCCTTATTATCCCT  
TGTATCCTGTGTATCCTGTGTGCCCTTTGTTCCCTACTTTATATAGGGTGTGTTATATGTT  
ATACATTATTTATAATACACTTTGTAGCGTCCATTTTATCCATTTGTATCCTACAAGCCT  
CCATTTTACTATGCAACCGATATCGGTTGCCTTTGACACACCTAACATTATACATTCTTA  
TTGTTACATTATTTAAAGTTAAATCCTTTTGGCTCTGTTTAAGGCGCCAGTGAGCCAGT  
GGCGCACCTTATATTACTCATCATCCTGTCCAGGTGCACTGCAACAATGGTTTGCAAAC  
CTTGTTTTACCCTTACATAATAAACTGCTTTTAGGCACATATTTTCACTGTTTTTACTT  
GCTTTAATTACACTATTGGCCTGTACAACCTACTTTTAGATTCAAGAATGTGCTTGTAGG  
TTATATACCTGTCACCTGATTCTACTTTTATTGCAACCGATTTTCGGTTGGCCAAATCCTT  
ACACATTATATA

>gi|27462483|gb|AF436130.1|\_HumanPapillomavirus\_type\_74\_subtype\_AE10,\_complete\_  
genome

ATGGAAAGTGCAAATGCCTCCACGTCTGCAAAAAGTATAGACCAGTTGTGCAAGGACTGC  
AACATTCCCTATGCACAATTTGCAAATTTTCATGCGTGTTTTGCAGGAAAACCTTGTCTTGT  
CCAGAGGTATATTCCTTTGCCTATAAAAAATTTGTATATAGTATACCGAGGAAACTTTCCA  
TTTGCAGCGTGCGCCATTTGCTTAGAACTACAAGGTAAAGTAAATCAGTTTAGACACTTC  
AACTACGCGGGATATGCGTTAACAGTGGAAGAAGAAACAAAGCAGTCAATTTTGGATGTG  
CTAATACGCTGCTACCTGTGCCATAAGCCGCTGTGCCACGTGGAAGGACGACGACATT  
TTGGAAGGCAAGATTTATTAACTAGGCGACACCTGGAAAGGGCGCTGCTTACATTGC  
TGGACAACATGCATGGAATAATCCTACCTTAAAGGAAATTGTGTTACAGCTACAACCTG  
ACCTTGTAGGCCTACTTTGCAATGAGCAATTAGACAGCTCAGAAGAGGAGGTGGATGAAC  
TAGCCACGCAAGCCACGCAACATACACAGCCTTACCAATAGTAACCTGCTGTTGTGTGT  
GTAATCGCAGCCTTCGGCTTGTGTGTGTCAGTGTACAGGACCAGACATCAACAATCTACATA  
CGCTTCTACTGGGTACACTGAGCCTAGTGTGTCCTCTGTGCGCGCCCAAAACGTAACGAC  
ATGGCGGAAAAATACAGGTACAGAGGGGACGGGGTGCTCAGGGTGGTTTTTTAGTAGAAGCA  
ATAGTAGAGCATAACAACAGGACAGCAGATTTTCAGAGGATGAGGATGAAACAGTAGAGGAT  
AATGGGTCTGATATGGTAGACTTTATAGATGACAGGCCTATTACACACAATTCCTTGGA  
GCACAGGCATTGTTAAACGAGCAGGAGGCGGATGCTCATTATGCAGCTGTGCAGGACCTA



AAACGAAAGTATTTAGGTAGTCCATATGTTAGTCCTTTGGGTAATATTGAGCAGTCAGTA  
GACTGCGACATAAGTCCCCGGCTGGACGCTATAAAATTAAGTAAAAACCTAAAAAGGTA  
AAGCGACGGCTGTTTGAACAAAGGAAATAACGGACAGTGGATATGGCAATCTCTGAAGTG  
GAAACTCAAACGCAGGTAGAGAGCAATGGCGAACCGGAAGGTTGCGGGGGAGGTGGACAG  
GGAAGGGACACAGAGGGGGAGGAAACGGAAGTACAAACAGATAGCGACACACAACAGCAG  
ACAGCAACCACGCGGATACTAGAACTATTTAAATGTAAGGATGTAAGGGCTACACTTCTT  
GGTAAGTTTAAAGACTGTTATGGGTATCCTATACTGATTTAATTAGACAGTTTAAAGC  
AACAAATCAACATGTGGGCATTGGGTGGTAGCAGCATTTCGGGGTACATCATAGTGTAGCA  
GACGCTTTTCAAAACCTAATACAGCCTGTAACAACATATAGCCATATACAATGGCTTACA  
AATGCATGGGGAATGGTGCTGCTAGCATTATTAACATTTAAAGTAAATAAAAAACAGATGT  
ACCGTGGCACGAATGCTGGCAACATTGCTTAACATTCCTGAGGACCACATGCTAATAGAG  
CCACCAAAAAATACAAAGCACTGTGGCGGCCTATATTGGTTTAGGAGTAGTTTATCGAAT  
GCCAGTATAGTACAGGGAGACACACCAGACTGGATAACAAGGCAAACCATTTGTGGAACAT  
GGTATTGCAGACAATCAATTTAAATTAGCAGACATGGTACAATGGGCATATGATAATGAC  
CTGTGTGATGAAAGTGAGATTGCCTTTGACTATGCACAACGAGCAGACATAGATGCAAAT  
GCAAGGGCATTTTAAATAGTAATTGTCAGGCAAAATATGTAAAAGACTGTGCCACTATG  
TGTAAGCATTATAAAAAATGCAGAAATGAAAAAATGAATATGAAACAATGGATACATTAC  
AGGAGTAGTAAAGTTGAAGAGGCAGGAAATTGGAACCAATAGTACAATTTTAAACAT  
CAAAATATAGAATTTTCCATTCTTAAGTAAATTAAAGCTGTGGCTGCATGGTACACCA  
AAGAAAAACTGTATTGCAATAGTGGGACCAAGCAGACACAGGCAAATCATGTTTTTGCATG  
AGTTTAATTAAATTTCTAGAGGTACTGTAATAAGTTATGTAAATTCAAGTAGTCACTTT  
TGGCTTCAACGTTATGCAATGCAAAGGTAGCGTTATTAGATGATGCAACACAATCCTGC  
TGGGTATATATAGATACATATATGAGAAACCTATTAGATGGGAATCCAATGAGTATTGAT  
AGAAAGCATAAATCATTGGCATTAATAAAATGTCCGCCATTATTAATAACATCTAACATA  
GACATTACTAAAGACGAGAAATATAAATACCTATTTAGCAGGGTGTGAGTATTTACATTT  
CCAAATCCATTCCCTTTTGACAGAAATGGGAATGCAGTATATGACCTTTGTGAATCAAAC  
TGGAATGTTTCTTTACAAGATTATCAGCAAGCCTAGATATACAAAACCTCAGAGGACGAG  
GACGATGGAGACAATAGCCAAGCATTTAGATGTGTGCCAGGAACAGTTGTTAGAACTGTA  
TGAAGAAAATAGTAATAACCTTGAAAAGCATATACAACATTGGAATGTGTACGGCACGA  
AAGTGTACTGCTACACAAAGCAAGGCAAATGGGCCTACACCATATTGGAATGCAAGTGGT  
GCCCCACTAGCAGTGTACAAAACCAAGGGACATGAGGCAATTGAAATGCAAATGACATT  
AGAGACATTACTAAAGTCCGCCTATGGTATGGAGCCATGGACATTGCAAGACACAAGTCG  
GGAAATGTGGTTAGCCCCCTCCAAAATACTGTTTTAAAAAACAGGGACAACTGTGGAAGT  
AAAATATGACTGCAAGGCAGACAATATTATGGAATATGTTATGTGGAATTTATATATAT  
ACTGGACGGCGACGAATGGGTAAAGGTGGAAGGACAAGTTGACTATAGGGGGCTGTATTA  
TGTACAGGGAGGGTATAAAACATACTACACAAATTTTGAACCTGAGGCTAAAAAATATGG  
GAATACGTTGCAGTGGGAAGTGTGTGTTGGCAGCACAGTTATATGTTCTCCTGCATCTGT  
ATCTAGTACTGTGCAAGACGTATCCATTGCTGGGCCTGCTTCATACCCCCACCACCACCAC  
CTTTGCACAGGCCGCCCAACAGTGTCCACTACCGCCGCCGAGGATCACGTGGACGCGCC  
GCCAGTAAAAAGACCCCGAGGACGTTCCACCAACACCAACACCACCAACAACCAACAA  
CACCAGAAGCACCCTGTGTATCACAAACGGAGACTCCGTGGACAGTGCAACAACAACAT  
CATCGCTAACCATTACAACAATAACAAAGGACGGGACAACCTGTTACTGTGAGCTACGCC  
TATAGTTCAATTACAAGGTGACCCAAATGTTTAAAGTGTTTATAGATACAGATTACATGA  
CAAACATAAACACCTGTTTTTGTGAGCATCCTCCACATGGCATTGGACCAGTCCCCTAT  
ACCCACAAAACATGCACTAGTAACACTAACATATGCTAATGAACAACAGCGACAACAGTT  
TTTAGATACTGTAAGACTACCTACAACAATTAGTTATAAGTTGGGATATATGTCATTACA  
ATTGTTGTAATAGTGCATTGTAAATATTGTATGTATTGTACATGGACCTAATACCTATAG  
ATGGTACTATAGGAACAACAGCACCTCCATACTGCCAGTTGTAATAGCTGTTTTTGTAT  
GTATTGTTAGCATTGTATTATAATTATAGCAATAACTGATTTTTTTTGTATATACATCCATAC  
TGGTACTAACACTCATTCTATATTTATGCTTTTGGCTTTTACTAACATCTGCTTTGCAGT  
TTTATACACTAACCTGTGTGTGTGCTATCTACCTGCGTTTTCTTTGCATTTATATATTT  
TACATAATTTAGAGTAACTATTACAATGCTAACATGTACATTGGATGATGGTGATACATG  
GTTGTTATTATGGTTGTTAACTGCACTTATCGTAGCTATTCTTGCATTATTGTTAATGCA  
TTTCAAGGGTGTAACGCCTTCTGTATGCAGTAAATAAGTGTTTTTATACATGCTGTGTAT  
GGTGTAATTATGGCACATAGTAGGGCTCGTCGGCGTAAACGTGCATCGGCCACCCAATTA

TATCAAACCTGTAAGGTGTCAGGTACATGTCCCTCTGATATTATACCTAAAATTGAGCAT  
AATACTATTGCAGATCAAATATTAAAGTGGGGAAGTTTAGGGGTGTTTTTGGGGGGCTT  
GGCATTGGTACAGGCTCTGGTACCGGTGGCAGGACCGGTTACATTCCTTTACAGTCTGCC  
CCACGCCCTGACATTCCTTCTGGGCCTGCTGCACGTCCGCCCATTTATTGTTGATACAGTT  
GGCCCTGGTGACCCCTCTATAGTGTCTTAGTTGAAGAATCTGCTATTATTAATTCTGGG  
GCTCCTGAGGTGGTGCCCCCTTCACATGGGGGGTTTGAAATTACTACATCTGAATCAACC  
ACACCAGCTATATTAGATGTCTCTGTTACAACACACAACACTACCTCTACAAGTGTATTT  
AGAAATCCCTCGTTTTACTGACCCCTTCTGTTATACAGTCTCAACCCCCGTAGAGGCTGGT  
GGTCATGTGCTGATTTCTCTCTCTACTGTTTCTTCCCATCCAGTAGAGGAAATACCTTTA  
GATACATTTATTGTCTCTCTCTGATAGTAATCCTGCATCCAGTACTCCTATTCTTACA  
GCTGCTACACGTCCTCGTATTGGTTTTATATAGTAGGGCCCTGCATCAAGTACAGGTCACG  
GATCCTGCTTTTTTGTCCAGTCTCAACGCCTTATAACCTTTGATAATCCAGTATATGAA  
GGTGAGGATGTTAGTTTGCAATTTCAACACAATAACAATACATAATCCTCCTGATGATGCC  
TTTATGGACATTATTCGCCTACACAGACCTGCTATAACGTCTCGACGTGGTCTTGTACGG  
TTTAGTAGAATTGGGCAACGGGGGTCTATGCATACGCGCAGTGGTAAGCATATAGGTGGA  
CGGGTGCATTTTTTTCAAGACATTTCTCTATATCTGCTGCAGAATCTGCTGCGGAAGAA  
ATAGAGCTGCACCCCTCTTGTGGCTCATGCACAGGATAGCAGTGGCTTATTGATATTTAT  
GCAGAACCTGACCTTGAGGTTATGGAGGAACAGTTCATTGTCTGTTTTCAACATCCACA  
CCCTTTCAGCGGTGCGTGTGTGTCAGCCACATGGGGCAATACTACTGTCCCCCTTTCATTG  
CCAGGTGACATGTTTTATACGCCCTGGTCTTGACATAATGTTTCCAACATGCATCTTCTACA  
ACGCCCTATAGTCTGTTACTCCTGCTTTACCTACAGGTCTGTTTTTATAAATGGTTCT  
ACATTTTATCTATATCCATCATGGTATTTTGCACGCAAACGCCGTAAACATGTTCCCTTG  
TTTTTTACAGATGTGGCGGCCTAGTGACAACCAGGTTTATGTGCCTCCTCCCGCCCCCTGT  
ATCCAAGGTCATTACCACGGATGCTTATGTTACACGCACCAACATCTTTTATCATGCTAG  
CAGTTCTAGACTACTTGCTGTAGGAAATCCCTATTTCCCTATAAAACAGGTAAACAAAAC  
AGTTGTTCTAAAGTGTCTGGATATCAATTTAGGGTGTTTAAGGTGCTTTTGCCAGATCC  
CAATAAATTTGCTTTACCTGACACTTCGTTATTTGACCCCTCCAGTCAACGTTTGGTATG  
GGCCTGTACGGGTTTGAGGTAGGTAGGGGACAGCCTTTAGGTATTGGCATTAGTGGTCA  
CCCCTTATTAATAAATTAGATGATGTGGAACCTCCGCTAGTTATGCAGCCAATCCTGG  
TCAGGATAACAGGGTTAATGTTGCTATGGATTATAAGCAAACACAGTTATGCATGGTAGG  
CTGTGCTCCCCGTTGGGTGAACATTGGGGAAAAGGCAAGCAATGTTCTAATGTTACTGT  
AAAGCCAGGCGATTGCCCTGCATTAGAATTAATTACTAGTGTAATTCAGGATGGTGATAT  
GGTAGATACAGGCTTTGGTGCCATGAATTTTGTCTGAATTGCAGCCTCTTAAATCTGATGT  
TCCTTTGGACATATGTAACACTACATGCAAATATCCTGATTATTTACAAATGGCTGCAGA  
TCCATATGGGGATAGATTGTTTTTTTACTTACGCAAGGAACAAATGTTTGCAAGGCACTT  
TTTTAATAGGGCTGGAACAGTGGGTGAGGACATTCCCCAGGACCTATATATTAAGGGTAC  
TACACGTGGTACACTTGCCAATGCTATTTACTTTAATACCCCAGTGGTTCTCTTGTGTC  
TTCTGAAACACAGTTGTTTAATAAGCCCTTTTGGCTACAAAAGGCGCAAGGCCACAATAA  
TGGCATTTGTTGGGGTAATCAATTGTTTGTACAGTTGTGGATACCACACGTAGTACTAA  
CATGACAGTGTGTGCGCTACTACACAATCCCCCTCCTGCTGCTACATATACTAGTACAGA  
CTACAAACAATACATGAGACATGTGGAGGAATTTGATTTGCAATTTATTTTTTCAGTTATG  
TAGTATTAATAAATTAAGTGTGAGGTTATGGCCTATATTCATACTATGAATCCTACAGTTTT  
AGAAGACTGGAACTTTGGCCTAACACCTCCCCCAATGGTACTTTAGAAGACACCTACAG  
ATATGTGCAGTCTCAGGCTATTGCATGTCAAAAGCCTACTCCTGATAAAGCAAAGCCTAA  
TCCCTATGCCAATTTAAGTTTTTGGGAAGTAAATCTTAAGGAAAAGTTTTCTAGTGAGTT  
GGATCAATACCCCTTGGTAGAAAGTTTTTATTGCAAACAGGCGTGCAGGCGCGCTCTTC  
GGTTCGTGTAGGTAAAAAGCGTTTCGGCCCCCTACAGCCCCCTCCTCAACCACTAAACAGAA  
ACGCTCTAGGAAACGATAGCATGCTTTTGTGTTGTGTTATATGTTGTTGCATGGTATA  
TGTGTCATTGATTATATTGTGTGTCATATGTTGTGTATGGTTTATGTTGTATGTACTTG  
TGTGTGATATTGTATGTGTGTCATGTTGTGTAATGTTGTATGTACTGCCTGTATGTGTTTAC  
TGTTGTATGTACTGCATGTATGTGTTTGTGTGTACAATAAACTTTATCTATCCCTGTGT  
CCTGTTTTTACCCTGTACGTGTGTGCTTGTCTTATAATTCTATATACCTAATTTACCTTT  
TTATAACCCCTTCCCTCCATTTTTTAGTGCAACCGTTTTTCGGTTATTACTCATCTCTCCAC  
ATCCTGTAACCAATTTGTTGCAGCAAGCATTTTATGTAATCCTATATACTGTTTGCCAAG  
GTCATACTGTGTTGCCAAGTACACACCTGGTGCACAATTAGGCGCGGTTTTGGCATCCAC

ATAATACATTCTAATCTATATAAACTCCTGTCTGCCTGTTTAAACAATTGGGTACTTTG  
TTAATACATTTTGTAGTTGGTAGCCAACCTTTTAAAAGCATTTTTGGCTGCCAGTACCAC  
ATTTTTCTAAAGTTACTGTTAGGTTTATAAAATGAGTAACCTAAGGTTACACACCTGCAA  
CCGGTATCGGTAAACACACGCCCTCTGCACTTCCTTATTATACATAATAACAATTTTACC  
TTTTTGAAAAATAGGAGGAACCGAAATCGGTTCCAACCGAAAACGGTTATATATAAACCA  
GCCCAAAATTAAGCAAGCGGGGCATA

>gi|6970418|dbj|AB027020.1|\_Human\_papillomavirus\_type\_69\_DNA,\_complete\_genome

CTTTTAAACAATCATAGTTTTATAAAAGGGTGTAACCGAAGCGGTTTTAAACCGAAAACGGT  
GCATATAAAAAGTAAAAGACACAGCCATACACAAAACCAGCTATGTTTCAAGATCCCAGAG  
AAAGACCACGAACGATACATGAACCTATGTGAAGCTTTGAATACACCTTTGCAATCTTTGC  
AGGTACAGTGTGTATATTGCAAGAAAACATTAGAATGGGCAGATGTATATAACTTTGCAA  
TATGTGATTTAAGAATAGTGTATAGAAATGATAGTGCATATGGTGCATGTAAAAAATGTA  
TAATATTCTATTCAAAAATAATAGAATATAGACGCTACACATCGTCTGTGTATGGTGCAA  
CACTGGAAGCGCGTCTTAAACGAAGTTTGTGTAAATTTGTTAATAAGGTGTCATAGATGCC  
AAATACCATTGGGACCGGAAGAAAAACAGAGAATTGTGGATGAAAAGCGACGGTTCCATG  
AAATAGCAGGGTACTGGAAAGGGTTGTGCACAACTGCTGGAGACCAAGGCGCGAAGCAA  
CAGAAACACAAGTATAAATAACAATGCATGGAGACACAATTAATATACAGGATGTTATAT  
TAGATTTGGTGCCGCAACCCGAAATTGACCTACAGTGTACGAACAATTGGACTATGAAC  
AATTTGACAGCTCAGAGGAGGATGAAACAGATAAATGTGCGTAACCAGCAAGCCAGACAAG  
CTGAACAAGAAGCGTGTATTAGAATAGAAGCGGAATGTTGTGTATGTAATAGTATAGTGC  
AGCTAGCTGTACTAAGCAGTGCACAGAACCTCCGAGCGGTGGAGCAGCTGCTGATGGGCG  
ACGTGAGTTTGGTGTGCCACCAGTGTGCTACATACTAAACCTGCAATGGACTGCGAAGGT  
ACAGATGGGGAGGGGTGGGGTGTACAGGGTGGTTTTTCAGTAGAAGCAATAGTAGAAAAA  
CATACAGGAGAAACAATATCAGAAGATGAAATAGAGTATAGTAGCGATACAGGATCAGAC  
CTAATTGGATTTATAGATGATAGTAATATTAGTGTGGGGCAGAGCAACAGGTAGCGCAG  
GCATTGTTTCAGGCACAAGAAACACAAGCAAATAAGAAGGCAGTGCGTGCATTAAAACGA  
AAGTTACTAGGTAGTCAGAACAGCCCGTTGCAAGACATAACAAATCAAAGCAACAGTCAG  
CAGAGCACAGACGAAGTAAACAATTTACAGGCTAAAAGGAGAGCAGTGGACAGTGTTCG  
GACAGCGGGTATGGCTATACTGAAGTGGAACTCTTACGCCAGTACAGGTAGATAAACAC  
AATGAACAAAATGGCGATAGTGTGTGTAGTCAGGGGGGGTCAAGTGGATCTGTATCAGAC  
ATGGAGGTGGACATAGGAGCACAGGCAAGTAGTGTAAACAAAATATGTGAATTGTTAAAA  
TGTAGTAATGTAAAAGCAGCATTATTAAGCAAATTTAAAACAGTATATGGTGTAAAGTTAT  
ACAGAATTAGTACGAGTGTTTAAAAGTGATAAAACATGCTGTTCAGATTGGGTATGTGCA  
GCCTTTGGTGTGGCAGGCTCTGTAGCAGAAAGTTTAAAACACTAATACAACCATATTGT  
TTATACTATCATATTCAATGCTTAACATGTAATTGGGGAGTACTACCACTAATGCTAATA  
CGATTTACATGTGCCAAAAATAGAGCAACAATTAAAAAATGCCTGTGTACGTTACTGAAT  
GTGCCAGACACACAGTTGTTAATAGAACCACCAAAATTACGTAGTACAGCAGTTGCATTA  
TATTTTTATAAAACAGGATTATCAAAACATAAGTGAAACACATGGGGACACACCAGAATGG  
ATAGTAAGACAAACACAATTAGAACATAGTTTTGAAGATACAATATTTGATTTATCAAAA  
ATGGTGCAATGGGCATTTGATCATGACATAACAGATGACAGTGAATTTGCATTTAAATAT  
GCACAATTGGCAGACATAGAAAGTAACGCTGCAGCATTTTTTAAAAAGTAACTGTCAGGCA  
AAATATGTAAAAGACTGTGCAACTATGACAAGACATTATAAAAGAGCACAAAAACGATCC  
ATGGGCATGTCAATGGTTACAACATAGGTGTTCAAAAATAGAAGATGGAGGAACGTGG  
AAGGACATAGCAAGATTTCTAAGATATCAAAATGTTAATTTTATTTATTTTGTCAAGTA  
TTAAAACAGTTTTTAAAAGGAACACCTAAACACAACCTGTATAGTAATATATGGGCCACCA  
AATACTGGTAAGTCACAGTTCGCAATGAGTTTTATAAAATTTGTGCAAGGGTCTGTCATT  
TCATATGTAACTCTAACAGTCACTTTTGGCTGCAGCCATTAGAAGATGCAAAGGTGGCA  
TTATTAGATGATGCTACATATGGCTGCTGGCTATACATAGATAAATACCTACGTAATTTT  
TTAGATGGCAATCCCTGTTGTATAGATAAGAAAACATAGAAGTTTAAATACAAGTAAGATGT  
CCACCATTAAATAATTACCTCAAACATTAATCCACAAGACGACAATTCATTAAATGTATTTA  
CATAGTAGAGTAACAGTTATACCATTTCCAAATACATTTCCATTTGACAGCAATGGGAAT  
CCTGTATATGAATTGACTGATGTAAATTTGGAAAAGTTTTTTTTTCCACCCTTGGTCCAGA  
TTAGATTTGGAGGAGGACGCGGACAAAAGAAAATGGAGAACCTTTGCCAGCGTTTAAATGC  
GTGCCAGGAGAAAATACTAGACTATTATGAACTGGACAGTGACAAATTAAGTGATCAAAT  
TGACTATTGGAACTGGTGCGATATGAATGTGCAATATTTTATAAAGCTCGTGAAGGGA

TATGCAATGTATTAACCACCAGGTGGTGCCATCGACAACAGTGTGTAAAGAAAAAGCTTG  
GCAGGCAATTGAATTACATATAGCATTACAGTCTTTAATGAATTCAGAATATGGAAAAGA  
GAAATGGACTATGAGAGACACGTGTTATGAATTGTATGTGACAGAGCCAAAACACTGTTT  
TAAAAAAGAAGGGACAACAGTAACAGTTGTGTTTGATTGTAATAAGGAAAAATACAATGGA  
CTATATTAGGTGGACATCTGTGTATTATAAAACAGATATGGGATGGTGTAAAACAAATGG  
AGAAGTGGATTATAAGGGGATATACTATATGCATGGGTGTTGTAAACAGTACTATGTGGA  
CTTTAAACAAGAGGCGTTAAATATGGGACTGGTTTGCAATGGGATGTACATGTGTGTGG  
TCAGGTAATATGTTGTCTGAATTTGTATCTAGTACCTCCGGGGACCAAATATCCACTGC  
TCAAACCTGCTGAACCACTATCAAACAACACCACCCAGACCCCCGAAACCACCTGTGTGCC  
CCGGTGCACCGAAGAAACCCCGGCGCCAGAGACAGCAAAGCGACGACGACTTAGTGGACC  
CAACACCCCTGTCACCACCACCAGTGTTACAAGGCCCAGAAGTTCCTTGGAGCATAACAGA  
CAACGTGTTACACAGTAACAGTGGAAGCAACAACCCGGAAGGGGCACGTGTAGTGACCA  
GACTGTGTTTATAGTACATTTAAAAGGTGATACAAATTGTTTAAAATGTTTAAAGGTATAG  
ATTTAAAAAACATAAGGGATTGTATTGTAAAGTGTCATCTACCTGGCATTTGGACCAGTAA  
TACTAACCAAGGCATTGTAACAATTACATTTGATAGTGAAACACAACGTGCTAGTTTTCT  
TACAACTGTTAAGATACCACAGAGTATAACATCAACATTGGGTATAATGTCATTGTAATC  
TATAGTGTAACATATATACATCCCACAAGCCAATATGTGCTGCTAACTGTATATACATAA  
CCATTTTACTACTTGTAAATTGTGTTTGTGCTTTGCGTGTGTGTGTGTTTGTGCTGTGTC  
GTTTGTGTCGCGCTTTTGTCTATATACACGTGTTTGCAGCCCATTTATTAATAATTATAT  
GTTTTTGGTTGTGGTTTCAACATCATTTACAGCTACGTTTTTTTGTATATATTTGTTTGT  
TTTATATACCTGCATTTTTTGTACATTTTTATGCTGTAATTTTACTACCTAATGGTTTTAT  
AAATAAACACTTCATAATGGTGGCTGTTTCGTGCATCACGACGCAAACGAGCATCAGCAAC  
AGACCTTTTACAAAACCTGTAAAGCAGCTGGCACATGCCCTCCTGATGTTATACCTAAAAT  
TGAAGGCTCTACTCTTGCTGATAAAATTTTACAATGGAGTGGGTGGGAATATTTCTTG  
TGGACTTGGTATTGGCACAGGAACAGGTACTGGTGGGCGTACTGGGTATATTCCTCTGGG  
TGGTGGTGGTAGGCCTTCTGTGGTTGATATTGGCCCTACTAGGCCTCCTATAATAATTGA  
ACCTGTGGGCCCCAAGTGAACCTTCCATAGTTACTTTAGTAGAAGAATCAAGTATTATACA  
ATCTGGATCTCCATTTCCTAATTTTAGTGGTGGGGATGGGTTTGAGGTCACCTCCTC  
TACTACAACCCCTGCTGTGTTAGATATTACCCCTCCCTGGAAGTGTACACGTTACCAG  
CACAAATATACAAAACCCATTATATATTGAACCACCTGTAGATATTCCCTCAGTCTGGAGA  
GGCTTTAGGACACATTTTTTACTAGCACATCTACTGCCGGTACACACAGTTATGAAGAAAT  
ACCTATGGAGGTGTTTGCATCTAATACTAGTTCCGGGTCAAACCTATTAGTAGTACCCC  
TATACCTGGCATACTAGGGTTGCTGCTCCTAGATTATATAGCAAGGCCTATCAACAGGT  
TAAGGTCACTGACCCCAATTTTATTTCTAAGCCTTCCACATTTATTACCTTTGATAATCC  
TGCATATGAACCTATGGACACTACCTCACATTTTCTGCAGATAGCCACGTGGCCCCCTGA  
TCCTGATTTTTTTGGATATTATTGCATTGCATCGCCCTGCTCTTACTTCTCGCAGAGGCAC  
TGTAAGGTTTTAGCAGGTTAGGTCAAAAGGCCACACTTAAACACGTAGTGGTAAACAAAT  
TGGAGCTAAGGTACATTATTATCATGACATAAGTCCTATACATGCTACAGAGGAAGCTAT  
TGAATTACAACCTTTAATTACTTACAGAACAGCACTCTACACCATTGTTTGTATGTTTATGC  
TGATGCTGACCCCTGCCCCCTACATTTACATTTCCATCTACTACACCTACTACAATCCCTAG  
ATTTTCTTCTACAATATTTTCAACCACTAGTAGTGACCCCTAAATGTTACCATACCTCT  
ATCTACATCATTTGATATACCTATATATAACGGGCCCTGACATTTATGCTCCTGTACCTTC  
TTCCACATGGCCTTATATTCCACCTCCACCCACCACCATGTCACATTCGGTAGTTGCACA  
AGGGGGTAATTATTTATTTATGGCCTTATATTTATTTAATTCATAAACGCCGCGTAAACG  
TGTGCCTTGTTTTTTTTTCAGATGGCCTTGCGGCGTACTAGTGACAGCAAGGTATATCTGC  
CTCCTACCCCTGTGTCCCGGTTGTGACAGCGATGAATATGTACACGCACCGGATATATT  
ACTATGCAGGCAGCTCTCGATTATTAACCTTTGGGTCATCCCTATTTTCCAATTCCTAAAT  
CTGGTTCAACAGCAGAAATTCCTAAAGTGTCTGCTTACCAATATAGGGTTTTTCGTGTTT  
ACCTTCCAGACCCTAACAAATTTGGGTTGCCTGACCCCCAGTTATATAATCCCGAAACAG  
AACGGTTGGTATGGGCTGTGTTGGTGATAGAGTTGGCAGGGGACAACCGTTGGGTGTTG  
GGCTAAGTGGGCATCCTTTATTTAATAAAATTGGATGACACTGAAAATTCACATCTTGCCA  
CTGCTAATGCAGACACTGATAATAGGGACAACGTGTGTGTAGATAATAAACAACTCAGT  
TATGTATTATTGGATGTACCCCTCCTTTAGGTGAACACTGGGGCGTTGGCACTGTATGTA  
AAAATGCACAGTCTCAGGTACAGCGTGGCGATTGTCCACCTTTGGAACCTTATTTCCAGTG  
TTATTGAGGATGGTGATATGATTGATACTGGCCTTGGTGCCATGGATTTTACAGCTTTGC

AAGCTACAAAATGTGATGTGCCACTTGATATTAATCAATCTATTTGCAAATATCCAGATT  
ACCTTAAATGTCTGCAGATACGTATGGAAACAGCATGTTTTTTTTCTTCGTCGGGAAC  
AATTGTTTGCCAGACATTTTTTTAATAAAGCTGGCACTATAGGTGATTCTGTACCAGTAT  
CTATGTATATTAAAGGCGCTGGTCAAGGTCGTGAACCTCCAACCTCTATATACTCAC  
GTACGCCCTAGTGGCTCCATGGTGACCTCTGATGCTCAATTGTTTAAATAAACCTTACTGGT  
TACAGCGTGCCAGGGTCATAATAATGGCATTGTTTGGGGCAACCAATTGTTTGTACTT  
GTGTAGATACTACCCGCAGTACCAACCTCACTATTAGTACTGTATCTGCACAATCTGCAT  
CTGCCACTTTTAAACCATCAGATTATAAGCAGTTTATAAGGCATGGTGAGGAATATGAAT  
TACAGTTTATATTTCAATTGTGTAAAAATTACTCTTACCACTGATGTAATGGCCTATATCC  
ATACAATGAATTCTACTATTTTGGAAAAATTGGAATTTTGGCCTTACCTTGCCTCCTACTG  
CTAGTTTGGAAAGATGCATATAGGTTTATTAAAAATTCAGCTACTACATGTCAACGCGATG  
CCCCTGCACAGCCCAAGGAGGATCCATTTAGTAAATTAATAATTTTGGGACGTTGATCTTA  
AAGAAAAGTTTTCTATTGATTTAGATCAATTTCCACTGGGCAGAAAAATTTATGCTGCAGG  
CTGGTATACAGCGACGTCCTAAGTTAGGCACCAAACGTCCAGCTTCTTCCTTATCTGCAT  
CTTCCTCCTCTACCACACGTAAAAAACGCAAACTTACTAAGTAATTCCACATGGTTGTGT  
CAGTGTATAGTTTTGTATGTGTGTAATGTAAGGTGTGTTGTGTTTGTATGTATAATTGTA  
TGTTTTCTGTGTGTGTTTGTATGTATGTATGTATGATTATGTGTTTTCTGTGTTGTGTGG  
TTTACTGCATGCTTGTTATTTAATAAACAATGAATGTGTTGTATTTGTTATTTCTTCCTC  
CGTAGGGTATAGGGAAGTAACCTTAGGTAGTGTGTTTAGGTGGTGTTCCTTTTGCGAACCG  
AATTCCGGTTGCATTCACCTTATATTATATTTTGCAGGAACGGTTAATCCTTTGGGCACAC  
AACACATCCTGCCTCCTACGCTTGGCTTGCCTTAGACGTGGCTCACCTACATTACTCACAT  
ATCTTTTAACAATAGTTGCATACGCACCTTTTTTTTTGATTATAATAAAACTGCTGTTAGGC  
ACATATTTTTTATTGTATACATGGGTTTTACTAAGTGCATAGTTGGCTAGCAGTTTTACTG  
TTTTATGCCAACTATATGTCTGACACATTTCCTTTTAACAATAAAACTGCTGTTAGGCACA  
TATTTTATAAGCTACTTAGACACAGGTGTGGTAACAACCGAAATGTGTTTTGCCTTTACA  
TGCAACTTTCTTTCTAATAA

>gi|22023568|gb|AF419318.1|\_HumanPapillomavirus\_type\_91,\_complete\_genome

ATGAGTAAGTACTGTGTTAGGCACACCTGCAGACCGAAACCGGTGCTGCACACCTTACA  
TTCTTTGTGGTTATTAGTAACAATTATTATGCTTGTACTAAAGGGAGTAACCGAAAACGG  
TCCGACCGAAAGCGGTACATATATAAACCACCCAAAAACATAGCTTGTGGGGCATAATG  
TCTGCACGTAGCTGCTCCCAAAACGCTAAGACCATATTTGAGTTGTGTGACCAGTGTAAAC  
ATAACTCTGCCTACTCTGCAAATTAGTTGTATATTTTGAAGAAGTGGTTGACAACCACG  
GAAGTGTGTGCTTTGCATTTAGGGATTTAAAGGTTGTGTGGCGCGACAGTTATCCGTTT  
GCAGCGTGTTTGGCCTGCTTAAATTTTATGGTAAATAAGCCAATATAGGCATTTTAAG  
TACGCGGCATTAGCAGTAACAGTAGAGGAAGAAACACAACAACTGTATTTCGAGTTGTGC  
ATTTCGCTGTTGTAAGTGCCACAAGCCATTGTCGCCTATAGAAAAGGTGCAGCACATTGTG  
CAAAAAGCCCACTTTTTTTTACATAAGTAACGCGTGGAAGGGATATTGCCCTACACTGCTGG  
AAGTCATGTATGGAAAAGAGCCGACGCTCAGAGACTATGTGCTAACCTTGCAACCAGAAC  
CTAGAAGTTTAAACCTGTGACGAGCAATTAGACAGCTCAGACTCAGAGGATGAGCGTGAGC  
AATCCACGCAACAGGACCAGCAAGTGGACCTACAAGTTTACAAAGTTGTAACCGAGTGCA  
CCTCTTGTTATTGTTCAATTTCGTCTTGTTGTGAAGTGCTCAAGCAGTGACATCAAGACGC  
TGGAGGAGCTGCTGTTGGGGACATTACAAATTTGTGTGTCCCTTGTGCACTACAGCTGTGT  
GACTGCAATGGCTGATAAACAAGGTACAGAGGATGAGGGGTTGGGATGTTTCAGGCTGGTT  
TATAGTAGAGGCCACAGTAGACAAAACACGGAAAATGATATATCAGAAGATGAAATTGA  
GGAGGAAGAGGATAGTGGGTTTGACATGGTAGATTTTATTAATAATACATTAGAGGACAG  
CTGTGCAGAACAAAGCTGTGCGCAGGCCCTGTTGAATAAACAGCAAGCGGATGCTGATGC  
TGCTATAGTACAGGAGCTAAAACGAAAGTATATTAGTCCATATGTAAGTCTTATACAGTG  
TTTACAGGAGTCTGTGGACAGGGACCTAAGTCCTAGGTTGCATGCCATAAGATAGGAGG  
CGGACAAAAGGCAAAAAGGACACTGTTTGAACCGACAGAGCAGCGGCATAGTAACATATGG  
CAATTGTGAAGTGAAGCAACTGAGACAGGTAGATGTGGAAAATGGCGGACCGGAACG  
CCATATGGGGGCCATACAACATTGTGGGGAGGGGGGGAGTAGTGTGGCGGAAGCAGTGCA  
AGTAGTAGAGGAAGAGGGTGTAAACAAACAATAGCCAGACTACAGGAGAGCAAAGCCACG  
CACGCGTATTGTAGAATTATTTAAAGACAAAGATGTTACTGTGAAACTCTTAGGTAAGTT  
TAAAGACTTATTTGGCGTGGGATTTAATGATTTGGTAAGACAGTTAAAAAGTGATAAATC  
AACATGTACTGATTGGGTATATAGTGTATTTGGTGTTAATCCATCAATAGCAGAAGGATT

CCATATGTTATTAAAAGAACAAACATTATACCTACATACCCAATGGGTTACATGCCGATG  
GGGGATGGTGTGCTTGCATTGTGTAGATATAAGGTTGCCAAAAATCGCAGTACAGTCGG  
TAGACAGCTTGCACAAATGTTAAATGTACCTGTGCAACAAATATTGATACAGCCTCCAAA  
ATTACAAAGCGCTCCAGCAGCACTGTTTTGGTTTTAGAGCCGGTATGGGAAATGGTAGTGA  
AGTATCGGGCACAACACCGGAATGGATAAGTAGACAGACAGTGTTAGAACACAGTTTTTGC  
AGACACACAGTTTTAGTTTTAACAAATATGGTGCATATGGGCATATGATAATGGATATACAGA  
AGAATGTGACATAGCTTATTATTATGCACAACCTAGGAGACACGGATGCAAAATGCCGCTGC  
ATTTTTAAAAAGTAATATGCAAGCTAGGTATGTTAGAGATTGTGCATGTATGTGCAAACA  
TTATAAGCTAGCAGAAATGAAAAAATGTCTATGGCAGAGTGGATTAAAGCATAGAGGAGA  
GAAGTGTAATGATGGGGACTGGAAACCTATAATACGATTTTTTAAGATATCAGCATATAGA  
TATTATTACATTTTTTAGCAGCCTTAAAAAATGGCTGCATGGCATAACAAAAAATTTG  
TATTTGCATAATAGGGCCGCCGACACAGGTAAATCAAGTTTTTGAATGAGTTTAATGAA  
GTTCTTAGGCGGCACCTATGTTATCATATGTAAATCAAGTAGCCATTTTTGGTTACAGTC  
CTTAGTAGATGCAAAGGCAGCCATGTTAGATGATGTTACAGCAGCATGTTGGAATTACAT  
GGATATGCATATGCGAAATTTATTAGACGGCAATCTTACAAGTATTGATAGAAAGCATAA  
AGCATTAGCAGTTATAAAGTGTCTCCGTTATTACTAACATCCAACATGGATATTAATAC  
AGATGATAAGTATAAGTATTTAAAAAGTAGAATTACAACATTTACATTTCTAATGCATT  
TCCATTTGATACTAATGGCAATGCAATTTATGAGTTCAATGATGAAAAATGGAACCCCTT  
TTTTAAAAGGTTGGCATCAAGTCTAGAACTGGAACTGCAGAGGACGAAAAATGGAGACAC  
TAGCCAGGCGTCTAGATATGTGCCAGGAACAGTTGTTAGAAGTGTATGAAAAAGACAGCA  
GAGATCTGCAGGACCATGTGTTGCATTGGAAATGTATACGTTATGAGTGTGCATTATATT  
ATAAAGCAAGAGAAATGGGCATCAAACATCTAGGCCACCAGGTGGTGCCAAAGCTAGAAG  
TATCACGAGCAAAAGCACATGTGGCAATTGAAATGCAATTATCATTAGAATCATTATTAC  
AAACTGAATATAGCATAGAGCCGTGGACACTACAGGACACATGTCAAGAACTATGGCACA  
CGGAACCAAAAAAATGTTTTAAAAAACGGGGACAGACAGTAGAAGTGAGATTTGACTGCA  
ACCCTGAAAAATACAATGCAATACACCTTATGGTCAGAAATATATGTACCCGTGAATGACA  
CGTGGGTAAAAGTACATGGCCATGTGGACTATAAAGGCCTTTCATATACTGTGTGTGGGC  
AAAAAACATATTATGTAGATTTTATTAAGGAGGCACAAACGTATGGGGATACTGGACAAT  
GGAACGTTGTTGTGGGCTCAAACGTATATCTTCTCCTGCATCTGTATCTAGTACTGTCA  
CCGAAGTATCCTCTGTTGCGTCTACTGAACCCGACTCCAGAACAGCGACCACCGTCCCAG  
ATTCCACGTGCACCCAAAAAGACTACGAGGAGCAAGCGCCGCTAGAAAGCGAGTGCAT  
TCGAGCCCCACACAACCCAGATCCCCGTACCTTGGCCAGAAGTGTGGAGGAGAGCCAT  
TGGACAGTAGAGACCCACGAATCATCCCTAAGCATTCGAACCACAACCAAGGAGGGCACA  
GTGGTGGAAGTAACGCTACGCCTATAGTTCAATTACAAGGTGATGCTAACTCACTAAAAT  
GTTTTAGATACAGATTGGGCAAATATAAATATTTGTATGTTGATGTGTATCTACATGGC  
GATGGACAACAGAATCTAATAAACAACAAACAGTGCATTAATTACATTAACATATGCTAGTG  
TACAACAAAGGGAGGCGTTTTTTAGCTAATGTAAAAATTTCCACAACAATTAACATTGTT  
TAGGATTTTTTAACAATTATGTAAATAGTACCCTATGAATTTGTAAAACTACCTTGTATAT  
TGCTTGTATAGTGGAACCTGTTACTGTGACGTTAAGGGTGTGTGTAACACTCTAACCACACA  
ACCAGCCAACCTGCTGCTATTTTTGTTAATAGATGTAAAGCTTGGCATTTTATTAGTTAA  
TGTGCTTGTGTTGCATAATTGCTGTATTGGTGTGCGCATGGTTTGGCGACAACCTGGTGTG  
GGCTTCTGTGCTTGCTTCAGCTTCTATACTTTACTTTTTATCTTGGTCTGCACTTATATC  
ACTTACTAACGTGTTTATATTAATACTTGTAGTGTGGTTTGTACCGGCCCTTTTATTACA  
TTTACATATTACATATTACATTGCAAATTGAAACACAGCAATTGTAAATACATTGGTGTG  
CATATATTTGTACCTAGCATTATGTAACTTGTCATTTGATGATGGTGATTCATGGATG  
TTGTTATGGCTACTTGTAAACATTTATAACTGTATTGTTGATGTTATTAGTGTTTCATTAT  
AGGACAGTTAAGCTGCTGCCCTCCAGCAAATAAACAAATTAATTACTGTGTTTATATAAA  
CATGGTTTCTTATACACTTAAAAGGCGCAAGCGCGCTCTGCTACACAATTATATCAAAC  
ATGCAAGGCTGCAGGCACCTTGTCCTCTGATGTAAATTAACAAGGTTGAGCATACTACAAT  
AGCAGATCAAAATTAATAATGGGCTAGCATGGGTGTGTATTTTGGAGGGTTAGGCATTGG  
AACTGGCTCTGGAAGTGGAGGAAGAACAGGCTATGTACCTATTCCAACAGGTGCGACAGG  
TACTGTTCCATAAGTTAGTGCAGAGCCTGGGGTAGTGTACAGTCTCCAGTTGTAATAGA  
ACCTGTGGCTCCAACCGATCCTTCCATTGTTTCATTAATTGAAGAATCAAGTATAATTGA  
GTCCGGGGCTCCAATCACAACCTATACCATCCCATGGTGGTTTTTGGAGGTAACATCATCTGG  
GTCAGATGTCCAGCCATTTTAGATGTGTCCACCAACAACATCTGTGCATGTTACCACCAC

TACACATTTAAATCCTGCATTTACTGATCCTGCAATTGTACAACCCACCCCACTTGA  
GGCTGGGGGACGTATTATAATTTCCCAATCTACTATTACAGCCCATAGTGCAGAAGACAT  
TCCTATGGATACATTTGTTGTGCACAGTGATCCACTAACTAGTACGCCTATACCTGGTAA  
TGCCTCACGACCTCGTTTtaggcctttacagtaaggctttacagcaaatagaaattgtaga  
ccctgcctttttgtcctcccccaacgtttaattacatatgacaatcctgtgtttgaaga  
tccagatgctacatttagcatttgagcagccaacagtacatgaggccccctgactctaactt  
tatggatatagtaacgttacatagacctgcattaacatctagacgtgggtcttgtagatt  
tagtaggggtggg'gcacgtgggtaccatgtatatcacgtagtgggtattcgtattgggggtcg  
tgtacacttttttaaagatatagttccaattgcaacacaggaatctattgaattacagcc  
cctaggacatttctactgttaattgttcctgatgccactgacttgtagatatttatgcaga  
tgatagcatttttagatgtacctcataccaaaccaatgtgtctacactgcctaacacaac  
aaaaattgttaacactacagtcccaacttgcaacagtacctgatatatatacacaaagcagg  
acctgatattacatttctacagtgccacttagtgtcccctatgtgccattgtcaccgctc  
tgttacaccttctgcagtatcaatatatggcacagattttttattttacatccttcattgtt  
gcatttttggcacaaacgccgtaaacgtatttcataatttttttgagataactatgtggcggc  
ttaatgacaacaaagtatacctgcctcctccaggccctatagcatctattgtaagcacag  
atgaatatgtgcagcgcaccaacttattttaccatgctggcagttcccgtttactggctg  
tgggccacccttttttctataaaaaataattctggtaaaagtaattgttcctaaagttt  
caggtagaccaatataggggtgttttagagttaaattaccagatcctaataaatttgggtttt  
cagaaacacatttagttacctcagacaccagcgttttagtatgggggtgtgtgggagttg  
aaattggtagaggacaacccttaggtgttggaaataagtggccatccctattttaataagt  
atgatgacattgaaaacccgtctgggtatggcacatcaccaggacaagataacagagaaa  
acgtagcaatggattataaaacaaacacagctatgtattgttggctgtacacctcccatgg  
gcgaatatattggggcaaggagttccttgtagcacctcaggtattacacaaggtgattgtc  
ctgtaatagaattaaaaagtgaaagtatatagaggatgggtgatattggtagatacagggtttg  
gtgcacttgattttgcatccttacaagccagtaaaagtgacgtgccccttagattttatgta  
atactaaaagcaaatatccagattatttaggaatggcagccgagccatacggaaatagtt  
tatttttctttttacgtagggaacaaatgtttgttagacatttctttaatagggtcggtta  
ctacaggcgatgctgtccctaaggatttgtatatgtgcaggaacaggcaacaggcgcaaca  
tagcaggcagtatatatatttctactcctagtggggtcttttagtaacttcagattctcaat  
tgtttaacaaaccgctttggatgcaaaaagcacaggggcataataacggcatctgttttg  
gtaaccagggtgtttgtaactgttgtggatacaactcgcagcactaaccttaaccttgtgtg  
catccactgagctgtgtgtactactacatatgacaacacaaagttcaaagaatatTTAA  
ggcatgcagaagaatttgattttacagtttatatttcaattatgcattataacacttaatc  
cagaggtaatgacatacatccacactatggatgcattatttagaagactggaactttg  
gggtatccccctccagccacggcatcactagaggatacttatcgcttttttggttaataagg  
caattgcctgtcaaaaaaattgtcccacaaaagccaaagaggaccatacaaaaactata  
cttttttgggatgtggatcttaccgaaaagggttttctgcacaacttactcaatttccattag  
gacgcaaatTTGTTATGCAGGCTGGATTACGTCCTAGGCCTAAATTAAAACTGCGGAAGC  
GTGCAGCACCATCCTCCAGTTCAGCGCTGCCCTCAAACGAAAGAAAACTAAGCGATAAC  
TATTATATTACTGTATGTTGTGTATGTGCATTTGTGTATTGTATGTGGTTTGTATACATG  
TGTGTGTGTATTTATGTATTTATACATGTGTGTTATGTGTGCTGTATGGAATGAGGAATA  
TGTGTATGTGTGTATGTGTTGCAGCTTAATAAACATTTTtagtGTGGTGTGGTCCATGG  
TTGCACCCAGTGAGTAACTATGTGTTTCTTTCCTGTTTTGTGTTATGAATGTCCAGCGTT  
GGGGCAGCGTTGGGGTTTAGGTCTGGTGGTAGTCATGGCGTCTGTTTGGTTACAAAAGT  
CATTTTTATTACTGTGCAACCGATTTTCGGTCGTGTTTGGCAACGTAGGTATTGTGTCAGC  
ATAATTGCAAGGTTACATTGACCTGCCAAAATATGTTGGCACAGTATAATTTCCCTTTGG  
CGCCAAAGGTGTGGCTTCCCTACGCCTACATTCCACTTTTACTATAAATTTACCTTTTTAC  
CTTTGTGTGTGCTAAGGTTTTATTACTTTTAACCACATACATGTTTTATGGCTTTGCTTA  
AAAGCTTTTTTGGCTCACATAACAATAAAGCACCCATAAAACATGT  
>gi|333050|gb|M74117.1|PPH35CG\_Human\_papillomavirus\_type\_35\_complete\_genome  
CCCTATAAAAAAACAGGGAGTGACCGAAAAACGGTCGTACCGAAAAACGGTTGCCATAAAA  
GCAGAAAGTGCACAAAAAGCAGAAGTGACAGACATTGTAAGGTGCGGTATGTTTCAGGA  
CCCAGCTGAACGACCTTACAACTGCATGATTTGTGCAACGAGGTAGAAGAAAGCATCCA  
TGAAATTTGTTTGAATTGTGTATACTGCAACAAGAATTACAGCGGAGTGAGGTATATGA

CTTTGCATGCTATGATTTGTGTATAGTATATAGAGAAGGCCAGCCATATGGAGTATGCAT  
GAAATGTTTAAAATTTTATTCAAAAATAAGTGAATATAGATGGTATAGATATAGTGTGTA  
TGGAGAAACGTTAGAAAAACAATGCAACAAACAGTTATGTCATTTATTAATTAGGTGTAT  
TACATGTCAAAAACCGCTGTGTCCAGTTGAAAAGCAAAGACATTTAGAAGAAAAAAACG  
ATTCCATAACATCGGTGGACGGTGGACAGGTCGGTGTATGTCCTGTTGGAAACCAACACG  
TAGAGAAACCGAGGTGTAATCATGCATGGAGAAATAACTACATTGCAAGACTATGTTTTTA  
GATTTGGAACCCGAGGCAACTGACCTATACTGTTATGAGCAATTGTGTGACAGCTCAGAG  
GAGGAGGAAGATACTATTGACGGTCCAGCTGGACAAGCAAAACCAGACACCTCCAATTAT  
AATATTGTAACGTCCTGTTGTAAATGTGAGGCGACACTACGTCTGTGTGTACAGAGCACA  
CACATTGACATACGTAAATTGGAAGATTTATTAATGGGCACATTTGGAATAGTGTGCCCC  
GGCTGTTACAGAGAGCATAATCTACAATGGCTGATCCTGCAGGTACAGATGAAGGGGAG  
GGGACGGGATGTAATGGATGGTTTTTTGTAGAAGCAGTAGTTAGTAGACGTACGGGATCC  
AGTGTAGAGGACGAAAATGAAGATGACTGTGACAGGGGGGAGGATATGGTGGACTTTATA  
AATGATACAGATATATTAAACATACAGGCAGAAACAGAGACAGCACAAGCATTATTTTCAT  
GCACAGGAGGAGCAAACACACAAAGAGGCTGTACAGGTCCTAAAACGAAAGTATGCTAGT  
AGTCCACTTAGCAGCGTGAGCTTATGTGTTAATAAACATAAGTCCACGTTTAAAAGCT  
ATTTGCATTGAAAATAAAAATACAGCAGCAAAGCGACGATTATTTGAACTACCAGACAGC  
GGTTATGGCAATTCTGAAGTGGAAATACACGAGATACAACAGGTAGAGGGGCATGATACA  
GTTGAACAATGTAGTATGGGCAGTGGGGATAGTATAACCTCTAGTAGCGATGAAAGACAT  
GATGAGACTCCAACGCGAGACATAATAACAATACTAAAATGTAGTAATGCAAACGCAGCT  
ATGTTGGCTAAATTTAAAGAACTATTTGGTATTAGTTTTTACAGAACTTATTAGACCATTT  
AAGAGTGATAAATCCACATGTACAGATTGGTGTGTGGCCGCATTTGGAATAGCCCCAAGT  
GTGGCGAACTTTAAACATATAACATATGTATACATATACAATGTTTATCGTGTTTCATGGG  
GCTATGGTAATTCTAGCATTATTACGATTTAAAGTCGAAAAACGAGAAACAACATTGAAA  
ACTATTGATGCTAAATTGCTATGTATTTACGCTGCAAGTATGCTAATACAACCACCAAAA  
TTACGTAGTACCCCAGCTGCGTTATATTGGTTTTAAACAGCAATGTCAAATATTAGTGAG  
GTTGATGGAGAAACACCAGAATGGATTCAAAGACAAACAGTATTACAGCATAGTTTTAAT  
GATGCAATATTTGACCTATCTGAAATGGTACAATGGGCATATGACAATGATTTTATAGAT  
GATAGTGATATAGCATATAAATATGCACAATTGGCAGAACTAATAGTAATGCATGTGCT  
TTTTTAAAAAGTAATTCGCAAGCTAAAATTGTAAAAGATTGTGCAACAATGTGTAGACAT  
TATAAACGAGCTGAAAAAAGAGAAATGACAATGTCACAGTGGATTAAGGCGATGTGCA  
CAGGTGGACGATGACGGTGACTGGAGGGACATAGTACGATTTTTTAAGATATCAACAAGTA  
GATTTTGTGGCATTTTTTATCTGCACTAAAAAATTTTTTACATGGTGTGCCTAAAAAAAT  
TGCATACTAATATATGGAGCACCAAACACAGGTAAATCATTATTTGGAATGAGTCTAATG  
CATTTCTTACAAGGAGCTATTATATCCTATGTAAATTCATAAAGCCATTTTTGGTTGCAG  
CCATTATATGATGCCAAAATAGCTATGTTAGATGATGCTACATCGCCATGTGGCATATAT  
AGACCAATATTTAAGAAATGCACTAGATGGAAATCCTATATTTTCATTTAGATGTAAAGCA  
TTAAGCATAGTGCATATAATGCCCACCTTTACTTTATTACATCAATATAAATGCAGGCAAA  
GATGACAGGTGGCCATACTTACATAGCAGGGTAGTGGTCTTTACATTTTCACAATGAATTC  
CCATTTGATAAAAATGGAAACCCAGAGTATGGGCTTAATGATAAAAACTGGAAATCCTTT  
TTCTCAAGGACGTGGTGCAGATTAAATTTGCACGAGGAAGAGGTCAAAGAAAATGATGGA  
GACGCTTTCCCAGCGTTTAAGTGTGTGTGACAGGACAAAATACTAGAACATTACGAGACTGA  
TAGCACATGTTTGTCTGATCACATACAGTATTGGAACTGATTCGTCTTGAATGTGCAGT  
ATTTTATAAAGCAAGAGAAATGGGAATTAACCTCTTAACCACCAAGTGGTTCACACGCA  
GGCCATTTCAAAGCCAAAGCAATGCAAGCAATTGAACTGCAATTAATGTTAGAGACATT  
AAATACAACTGAGTATAGCACAGAGGACTGGACACTGCAAGAAACAAGTATTGAACTATA  
TACAACAGTTCCTACAAGATGTTTAAAAAAGATGTTTATACTGTGGAAGCACAAATTTGA  
TGGTGATAAAACAAAATACATTATGCAATTACTAATTGGACACATATATATATATTAGAGGA  
CAGGTATAGTACTGTTGTAAAGGGACTGGTAAATTATAAAGGTATTTATTATGTGCATCA  
GGGTGTAGAAACATATTATGTTACTTTTTAGGGAAGAGGCTAAAAAGTATGGAAAAA  
TATATGGGAAGTGATGTGGGTGGTCAGGTAATTGTTTGTCTGAATCTGTATTTAGCAG  
CACAGAACTATCCACTGCTGAAATTGCTACACAGCTACACGCCTACAACACCACCGAGAC  
CCATACCAAAGCCTGCTCCGTGGGCACACAGAAACCCAGAAGACAAATCACAAACGACT  
TCGAGGGGGTACCGAGCTCCCTACAACCCACCAAGCGAGTGCGACTCAGTGCCGTGGA  
CAGTGTTGACAGAGGGGTCTACTCTACATCTGACTGCACAAACAAAGACCGGTGTGGTAG



TTGTAGTACAACCTACACCTATAGTACATTTAAAAGGTGATGCAAATACATTAAAGTGTTT  
AAGATATAGATTGGGTAAATATAAAGCATTGTATCAAGATGCTTCATCTACATGGAGATG  
GACATGTACAAACGATAAAAAACAAATAGCAATTGTAACATTAACCTACACAACAGAATA  
TCAAAGGGATAAATTTTTTAACTACAGTAAAAATACCTAACACAGTTACAGTGTCTAAAGG  
ATATATGTCTATATGATAGACCTTACAGCTTCCAGTACTGTGTTGCTGTGCTTTTTTGTG  
TGCTTTTTGTGTGCTTTTTGTGCTTGTGTCTGCTTGTACGTTTCGCTATTGCTATCTGTGTCA  
TTATACTCAGCATTAATATTACTGGTTTTAATACTGTGGGTACTGTAGCAACACCACTA  
CTTGCTTTTTGTGTTTCTTGCTTTTTGTATATACCTATGGATGATTAACGCTCATGCACAA  
TATTTGGCAGTACAGTAATTGTATACAAACATTGTGTTTTGGTACTGTGTAACATGTGTGT  
ATGGTGGTTTTATTTTTTGTGTTTCATTGTATATTTTTGTTTTTTTACTGTTTTTAAACAT  
TTTTATTTCTGTGTTTTTAATAAATTGATCACATGGTATAACCATGCGACACAAAAGGTC  
TACAAAACGTGTTAAACGTGCATCTGCAACACAACCTATATCGTACTTGCAAAGCTGCAGG  
AACTTGTCCACCAGATGTTATACCTAAGGTTGAGGGTAATACTGTTGCTGATCAAATTTT  
AAAATATGGCAGCATGGCTGTGTTTTTGGGGGGTTAGGAATTGGTCTGGATCTGGCAC  
AGGTGGAAGATCTGGATATGTTCCACTGGGTACAACACCTCCAACGGCTGCCACAAACAT  
TCCTATACGACCCCTGTAACCTGTGGAAGTATACCATTAGACACAATTGGCCCTTTAGA  
TTCTTCTATAGTGTCTATTAGTAGAGGAACTAGTTTTATTGAGTCTGGTGCCCTGTGTG  
TACACCAAGGGTCCCACCTACAACAGGTTTTACAATAACCACATCTACAGATACCACACC  
TGCTATTTTAGATGTGACATCCATAAGTACACATGATAATCCTACTTTCATGATCCTTC  
TGTTTTTACACCCACCCAGCCTGCAGAAACTTCAGGTCATTTTGTACTTTCATCATCTTC  
TATTAGTACACATAATTATGAAGAAATCCCTATGGATACTTTTTATTGTTTCCACAGACAG  
CAATAATATAACTAATAGCACGCCTATTCCAGGGTCTCGCCCTACGACACGCCTAGGATT  
ATATAGTAAAGGTACCCAGCAGGTTAAGGTTGTTGACCCTGCCTTTATGACTTCTCCTGC  
AAAACCTATTACATATGATAATCCTGCATATGAAGGCCTTAACCCTGATACAACCTTACA  
ATTTGAGCATGAGGATATTAGCTTAGCTCCGGATCCTGACTTTATGGACATTATAGCTTT  
ACATAGGCCTGCACTAACATCTAGGAAAAGGCACTATTAGATATAGTAGAGTAGGTAATAA  
ACGTACTATGCATACACGAAGTGGAAGAGCTATAGGGGCACGGGTACATTATTATCAGGA  
TTTAAGTAGTATTACTGAAGATATAGAATTACAACCCTTACAACATGTACCATCCTCTTT  
ACCACATACCCTGTTTCAACATCATTAATGATGGTATGTTTGATATTTATGCTCCTAT  
AGATACTGAGGAAGATATTATATTTTCAGCATCTTCTAACAATACTTTATATACTACATC  
TAACACTGCATATGTTCCCTAGCAATACTACTATACCATTAAAGTAGTGGCTATGATATTCC  
TATAACAGCAGGGCCAGACATTGTATTTAACTCTAATACTATTACTAACTCTGTACTACC  
GGTACCCACAGGTCCTATATATTCTATTATTGCAGATGGGGGTGACTTTTATTTACACCC  
TAGTTATTATTTATTAACGACGTCGTAAAGCTATCCCATATTTTTTTGCAGATGTCTC  
TGTGGCGGTCTAACGAAGCCACTGTCTACCTGCCTCCAGTGTGAGTGTCTAAGGTTGTTA  
GCACTGATGAATATGTAACACGCACAAACATCTACTATCATGCAGGCAGTCTAGGCTAT  
TAGCTGTGGGTCACCCATACTATGCTATTAATAAACAAGATTCTAATAAAATAGCAGTAC  
CCAAGGTATCTGGTTTGCAATACAGAGTATTTAGAGTAAATTACCAGATCCCTAATAAGT  
TTGGATTTCCAGACACATCATTTTTATGATCCCTGCCTCCAGCGTTTGGTTTGGGCCTGTA  
CAGGAGTTGAAGTAGGTCGTGGTCAGCCATTAGGAGTAGGTATTAGTGGTCATCCTTTAT  
TAAATAAATTGGATGATACTGAAAATCTTAATAAATATGTTGGTAACTCTGGTAACTCTG  
GTACAGATAACAGGGAATGCATTTCTATGGATTATAAACAACACAATTGTGTTTAATAG  
GTTGTAGGCCTCCTATAGGTGAACATTGGGGAAAAGGCACACCTTGTAATGCTAACCAGG  
TAAAAGCAGGAGAATGTCCTCCTTTGGAGTTACTAAACACTGTACTACAAGACGGGGACA  
TGGTAGACACAGGATTTGGTGCAATGGATTTTACTACATTACAAGCTAATAAAAGTGATG  
TTCCCCTAGATATATGCAGTTCCATTTGCAAAATCCTGATTATCTAAAAATGGTTTCTG  
AGCCATATGGAGATATGTTATTTTTTTATTACGTAGGGAGCAAATGTTTGTAGACATT  
TATTTAATAGGGCTGGAACCTGTAGGTGAAACAGTACCTGCAGACCTATATATTAAGGGTA  
CCACTGGCACAAATTGCCCTAGTACTAGTTATTTTCCCTACTCCTAGTGGCTCTATGGTAACCT  
CCGATGACAAAATATTTAATAAACCATATTGGTTGCAACGTGCACAAGGCCATAATAATG  
GTATTTGTTGGAGTAACCAATTGTTTGTACTGTAGTTGATACAACCCGTAGTACAAATA  
TGTCTGTGTGTTCTGCTGTGTCTTCTAGTGACAGTACATATAAAAAATGACAATTTTAAGG  
AATATTTAAGGCATGGTGAAGAATATGATTTACAGTTTATTTTTTTCAGTTATGTAAATAA  
CACTAACAGCAGATGTTATGACATATATTCATAGTATGAACCCGTCCATTTTAGAGGATT  
GGAATTTTGGCCTTACACCACCGCCTTCTGGTACCTTAGAGGACACATATCGCTATGTAA

CATCACAGGCTGTAACCTTGTCAAAAACCCAGTGCACCAAAACCTAAAGATGATCCATTAA  
AAAATTATACTTTTTGGGAGGTTGATTTAAAGGAAAAGTTTTCTGCAGACTTAGATCAGT  
TTCCGTTGGGCCGTAAATTTTTGTTACAAGCAGGACTAAAGGCCAGGCCAATTTTTAGAT  
TAGGCAGGCGTGCAGCTCCAGCATCTACATCTAAAAAATCTTCTACTAAACGTAGAAAAG  
TAAAAAGTTAATGTGTAAATGTGTATGCATGTATACTGTGTGTTATGTGTTGTAGTGCTT  
GTATATATATTATGTGTTGTGGTGCCTGTTTGTGTTGTACATGGCGTGTAAATGTGTGTA  
TAATATTGTGCAATGTGTTGTACGTGGGTGTTTTGTACTTAGTGTGTAGTAGTTCAGTA  
GCCATAAAGTGATGTGTGTGTTTATAATTAACACTGTATTGTTGTATGACTATGGTGCAC  
CGATATGAGCTTACATAATTACATGACAGCTATATTGTGTATATAAAATAATCTACCTCCA  
TTTTGTGTGTTAGTGTCCTTTACATTACCTTTCAACCGATTTTCGGTTGCTGTTGGTAAGC  
TTTATATGTTTTTTTACAAAAACATTCTACCTCAGCAGAACACTTAATCCTTGTGTTCCCT  
GATATATATTGTTTGCCAACCTTTATATTGGCTTTTGCCAATCTTTAAACTTGATTTCATCT  
TGCAGTATTAGTCATTTTTTCATACTTGTGGTCCACCCACACTTGTAACACTTGTAACAGT  
GCTTTTAGGCACATATTTTTTGCATTTCTAAAGGGCTTTAATTGCACACCTTGGCTTTAC  
ATATTATGTGTGTTTGCCAACACCACCTACACATCCTGCCAACTTTAAGTTAAAACATG  
CATGTAAAACATTACTCACTGTATTACACATTGTTATATGCACACAGGTGTGTCCAACCG  
ATTTGGATTACAGTTTTATAAGCATTTCTTTTTATTATAGTTAGTAACAAT

>gi|15741127|gb|AF349909.1|AF349909\_HumanPapillomavirus\_type\_86\_candidate,\_comp  
lete\_genome

ATGCCCAGAGGATGCCACACTCCTACAAATATTTTTGTGCTATGTCAGGAATATGAGGTG  
GATTTTGCAGACCTAAGACTGCTTTGCATCTTTTGCAAGAATGAATTAACAGAAGGCGAA  
TTGCTGTGCTTTGCACTAAAGGAATTATTACTGGTCTGGAAACACGGATTTCTTCATGGC  
GTGTGCCCTAAAAATGCATATGCAGAGAAGCCAAGGTACGTGAGCTACGACACTGGGAGCAC  
TCCAGCTACGGATCCACAGTGGAAACAAGACACAGGCGTATCATTGGCACACTTAAATATA  
AGGTGCCATGCGTGCTTTAAACCATTGTGCTGGCCAGAGAAGCTGCATATGGTGGAATTA  
AATCTGCATTTTTCATAAAATAGCAGGCCAGTGGACGGGAAAGTGCAGCAACTGTAGAGCA  
ACATGCATGGCCAGACGCCGACCATAAAAAGATATAGTGTTATGTGAAATACCAGATGTAG  
TTAACCTACATTGTGACGAGCAATTGTTAGACAGCTCAGAGGAGGAGGATAATAGGGATT  
GTGACCAACCTGCAGAACCAGCACAGCTGGCCTATAGGGTGTAAACAGAATGTGGGTGTG  
GTAGACGTCCACTTAAGCTGGTGGTGCCTGTGGAGCTGAAGACCTAAGGCAGCTACAGC  
AGCTTATGGTGGACGCAGTGGCCCTTGTGTGTCCAGGCTGTGCATAACATGGCAGAGTCT  
CCTGAAGGTACAGACGGCGGGACGGGGGGGGGGGGCGGGAGGGTGGTTTGTGGTAGAAGCC  
ATGGTACACCATAACAGCAAATACAGATGTGTCTAGTGATGAGGACGAATCTGCACCTGAT  
ACAGGAGAGGATATGGTAGATTTTGTAGATAACACTAGATATCCAGGGGACGGACAGGAA  
GTGCCGTTAGGTCTATATGTTCAACAAACAATGCAGGATGACGCTGCAACGGTGCAAGCC  
CTAAAACGAAAGTTTCATGGGAAGCCCGGCAGCTAGTTCCTGTGCATCCTGGGTGAATAAC  
GAATTAAGCCACGTTTGGATGCAATATGTTTACAGCAAAGGCACGACAAGGCCAGGAGA  
CGGTTGTTTTGAACAAGACAGTGGGTATGGCAATACGCAGGTGGATATTGGAACGTCCGAA  
AGCCAGGTACCAGGGGAACATAACAACAGCGGGGGGGGCGACGTAACACAGGACGTTATA  
GAGGAGGAACGGGGGGGGGGGGACGGGGAACCTGGGCCACATGTAGATACAGAACACACA  
CAGCAGAAGGAGGGCACGCCCCGATGCACTAGACCTGCTACAGGTAGTAACCTACGGGT  
CAGCTATTTACTAAGTTTAAAGGAGCTATTTGGACTATCATTTAAGGACCTAGTAAGACAG  
TTCAAAAGTGATAGGTCCACATGTGCAGAGTGGGTAGTAGGGGCATTTGGGGTGTATTAT  
GCAGTGGCAGAAGCAGCAAAAACATTATTGCAGCCAGTATGTGAGTATGCACACATACAA  
ACATTAACAAGTGAATGGGGAATGGTAATGCTGCTACTGCTACGGTTTAAAGTGTAACAAA  
AGCAGAGAAAACCGTAGCAAAGTGCCTAGGAACCATACTAAATATTCCAGAAAAGCGTATG  
CTAATAGAACCCCCAAAACAACGCAGTGCGCCATGTGCACTGTATTGGTACAAGACAGCT  
ATGGGCAATGCCAGTGAGGTGTTTGGGGACACGCCGACTGGATAGTAAGACAAACAGTT  
ATTGGACATGCAATGGGAGAAACACAATTTAGCCTATCTGTGTTAGTGCAGTGGGCATAT  
GACAATGAAATAACAGATGACACGAGCTAGCCCTATGAATATGCAAAATTGGGAAATGAG  
GACCCAAATGCAGCCGCTTCTTAGCAAGCAATTGTCAGGCAAGATATATTAAAGGATGCA  
ATAACAATGGTTAGACATTATAGACGTGCAGAACAGGCACGTATGAGTATGTCACAATGG  
ATTGCACATAGGGGGCGCAAGGTGGCTGACACAGGCGACTGGAGACATATAGTAAACTA  
CTAAGGTTTTCAGGGCATAGAATTTATTAGCTTTTATGGAAGCATTAAGCAATTCTTAAAG  
GGAACACCAAAGAAAAGCTGCCTAGTATTTTATGGACCCAGCGACACAGGGAAATCATTG

TTTTGCATGAGCCTATTAAGGTATTTAGGTGGAGCAGTAATATCCTTTGTAAATTCCACC  
AGCCATTTTTGGTTGTCGCCATTGGTAGATGCTAAAATAGGACTGTTGGACGATGCAACA  
CAGCAGTGCTGGGTATACATAGATACCTATCTAAGAAGTGTACTAGATGGCAATACAATG  
AGCATAGACAGAAAACATAAAAACCTACAACAGCTGAAATGTCCACCATTAATGATAACA  
ACAAATGTAAATATTGCAGCAGATGACACCTTTAAATATCTTAGAAGTCGAATGGTCGTC  
TTTCCGTTTCTACAAAAGTGCCCACTAGATAGCAATGGAGAACCAGTGTATAAACTAAAT  
AATGAAAATTGGAAATCCTTTTTTTCAAAGGTCGTGGGCACGATTAGACTTAACCCAGGAG  
GAGGAGGAGGAGGAGGAGGAGGCTGACAATGGATACACTAGCCGATCGTTTAGATGCGTG  
CCAGGACAAGTTACTAGACCTTTATGAAAAGGATAGCAACACTCTTGAGGATCAATTATT  
GCATTGGCAATACACACGCCTGGAAAAAGCTATATTATTTAAGGCAAGAGAAGCAGGACT  
AACACATATAGGCCACCAGGTGGTGCTGCAAGTAGTGTAACAAAGGAAAAGGCCGGCA  
AGCTATAACAGTGCAATTTGTCTTTGCAAAAGCTTAAATAACAGTGAGTTTAAACACGAGCC  
ATGGACATTGCAGGACACGTCATTGGACATGTGGAATGTCCCCCGAAAGGGTGTGGAA  
AAAAGGCGGACGCCCCATCAGAGTAAATACGATGGAGAAGATGACAAAGAAATGGAATA  
TGTCAGCTGGGGGTTTATATATATATATTGTGGTAGTGATGAAACATGGCATAAGGTGCC  
TGGTAAGATTAGCCATGCAGGGTGTACTATGAACTGGAAGGCCGAAACACTACTATGT  
TGACTTTGGAAAGGAGGCAAAACAATATGGGGTAAAAAACATGTGGGAGGTGCATGTGGG  
AGGCACAATTATTCACCATGCATGCGACTCTGTATCCAGTACTCAGGGAGGAGTGCCGAT  
ATCCATGTCTGAAACTGCTGCACAGTCGCTGTACACCACCACCGCGCCACCCCGCCGC  
CACCAAGAAAACCCCCAGGTGCAGGCGCCGCTGCTAAGCGACAGCGGCTCGGAAGCGA  
CGGCATACAGCAGCCCCGACTCTACAGGAGACAAGCGAGCATTTCGTGGACAGTTGCCTCCC  
AAGGACACAAAATAACCCTGACATCCACAGTGGTCGCGGGACAACAGTAACAGTCACGG  
TGCACCTGTCATTCACTTAAAGGTGACCCCAACCGTCTTAAATGTTTGAGATACCGATT  
GCAGCAATCTGTTCCCCAATTGTTTGAAAGAGCATCGTCCACGTGGCGGTGGACCTGTGG  
GGGGTCAGAGGACAAACAATCATTTGTAAACATTGTGGTATAGGGATACGGAACAACGCCA  
ACAGTTTCTAGCACGTGTAAATATACCTAAAGGAATTGTGGTAACACAAGGCATTATGTC  
AATGTGCATATAATAGTAGTTGTTTGTAACATTATATCCTGTATGTGAGCCAATTGTAG  
CAATTGTGTGTATTACATACCTGGTATATACTGCATCCTGGAACCTATTGTATGGGCCAT  
CCATGTATGGTGTACTGTGCTGCTGCTGCTAATTCTCTTTTGGCTTTCACACCTATCTGC  
TCTGGTTGCTTTTGTGTTGTGTTTGTGTTTATATATTTTGGGTTCTGGCTACTGTATAT  
ACAGGTACTGTGGTACATTGGATTGTTATAATCACACAACCAGCCATCTACTGCTGCTAC  
ACTACCTTGACAGCCCCCTCCCCATACAGTATGTATCCCCTACAGGTACGGGGTCCCCA  
GGGTGGATATGATATTGTGTTGTTTGACCGTGGGGATATGAGCATATTGGTTTTGTATT  
ACTATTGATTGCTATTATTTTGTGTTGTTATTTCATACGCATGTTACATGTGTAGGTGTG  
TATAGTTTTGTATTTTGGTTTTGTAATAAACTGTTGGTACCATGCCTAAGGTCAAATCCCG  
TCGCAAGCGTGCCCTCTGCCACGGACCTTTATCGCACCTGCAAGGCCTCTGGCACATGCCC  
TGCTGATGTGGTTCCTAAAGTGGAGGGCGACACATTGGCGGATCGCATATTAAATGGGC  
CAGTTTGGGTGTCTTTTTTGGGGGTCTTGGTATTGGTACCTCCTCGGGGTCCGGCGGCCG  
TACTGGCTATGTTCCATTGGGTACCCGGCCCCCTACAGTAGTGGATGTGGGGCCCACTGC  
CCGTCTCTCTGTGGTCATTGAACCTGTGGGTGCTACTGACCCGTCCATTGTTACATTGGT  
GGAGGATTCTAGTGTTATTAATGCAGGGGCCCCGTTACCCAACTTTACTGGAACGGGCGG  
GTTTGAAATTACCACATCGTCCACCCTACCCCTGCAGTATTAGACATTACCCCGTCAGG  
GTCCTCTGTGCAAGTTAGTAGCACTAGTTATATTAATCCATTGTTTACTGAGCCATCTAT  
TATAGAGGTTCACAGGCGGGTGACATTACTGGACATGTATTGTCTAGTACTGCCACCTC  
AGGGACCCACACATATGAAGAAATACCTATGCAAACATTTGCTGTACAGGGGGGAACAGG  
GCATGAACCCATAAGTAGTACACCTATACCTGGGGTGC GGCGCCTTGCAAGGCCTCGCTT  
AAATTTGTACAGCCGTGCTACCCAGCAGGTTCCTGTAGCTGACTCTGCATTTTTATCGCG  
TCCTGACTCCTTTGTTACCTTTTGATAACCCGTGTATGACCCAGATGAAACCATTATATT  
TGAGCATCCTAGTTTACATGCTCCGCCCCGATCCTGACTTTCTAGATATTGTTACCTTGCA  
TAGGCCTGCCTTAACTGCACGTAGGTGAGGTGTTAGATATAGTCGCATAGGTCAAAGGGC  
CTCCATGCGCACACGAGTGGTAACATATTGGGGCTCGTGTGCATTTTTATCATGACTT  
AAGTCCTATTGCACAGGCTGAGGATATTGAACTGCAGCCGTTGGGTGCTACCACATCCTC  
TGGCCAGGCCTCTGGCCAGGATACCTTATATGACATTTATGCAGATGATACACACCTATC  
CTCTATATTACAGGAGCCTTCCGTTCCCTCATTTGCATTCCACCACGCCTGTATCCTCTGC  
TACAGTGTCCGCCACATCTATGGTATCTTCCACATATGATAATGTTACTGTTCCCTTATC

ATCTGCAACCGAGGTTCCCTTATATACTGGTCCTGATATTGATCATGCCATAGCCCCATC  
GCCCACACCTTTACCTCCTGTGGTTCCCAGCACTACCCCATATGCCATTTATATACAGGG  
ATCTGATTACTATTTACTGCCTAATTATATATTTTTTCCACGAAAGCGTAAACGTGTGCA  
CTATTCTTTTTCAGATGGCTTTGTGGCGGCCTGGTGACGGCAAGGTTTACCTGCCCCCA  
CTCCCGTGTCTAAGGTTCTCAGCACGGATCGTTATGTATCTCGTACCAACCTATTTTATT  
ATGGTGGTAGTTCCCGCTTGCTTACTGTGGGCCATCCATATTATCCTGTTACTGTTTCCT  
CCAGCCCTGGACAAAACAACAAAAAGGCCAATATTCCCAAGGTTTCGGGGTATCAATACA  
GGGTTTTTtagggtgCGACTGCCTGATCCTAATAAGTTTGGCCTTCCTGACGCCCAATTAT  
ATAATCCAGACACTGAGCGCCTGGTATGGGCCTGTAGGGGCCTTGAGGTAGGACGTGGCC  
AGCCCTTGGGTGTAGGTGCCAGTGGCCATCCGTTATATAATAGGCTTGATGACACTGAAA  
ACACCTCCTTTCTTACTACTGAAAACGTAGACAGTAGGGACAATGTGTCTGTGGACTACA  
AGCAAACCCAGGTATTAATTGTAGGCTGTAAACCATCCATTGGTGAGCACTGGGGTAAAG  
GCACAGTGTGTTCTAATGTGCAGCCTAAACCAGGGGACTGCCCCCATTACAGTTTACCA  
ATTCCACAATTCAGGATGGTGACATGGTGGAGGCAGGCTATGGTGCTATGGATTTTGACA  
AGCTGCAGGAAAACAAGTCTGAGGTGCCTTTAGACATTTGTGCCACTGTCTGTAAATATC  
CTGATTATTTACAAATGGCTGCTGAGCCCTATGGCGATTGCATGTTTTTTGTTTAAGGC  
GAGAACAAATGTTTGCACGCCATTTTTTTAATAGGCAGGGTGTTATGGGTGAACCAGTTC  
CTGAAACTTATTATTTAAAGGGCTCCTCAGGCCCCCGAGGATCCCTTAGCAGTTATGTAT  
ATTGACCCACCCCTAGTGGCTCTATGGTGTCTCGGATTCCCAATTGTTCAATAAGCCAT  
ATTGGTTACAGAAGGCGAGGACACAATAAGTATTTGCTGGTTTAACCAGCTGTTTG  
TTACTGTGGTCGACACCACCCGAGTACTAATTTTACTATTAGTGCCGCTACCCAGAAGG  
CCTCTGAATATGACCCCTCTAAGTTTAAATGAATATCTAAGGCATGCAGAGGAATATGATT  
TGCAATTTTATTTTTCAATTGTGTAAGGTCCGTCTTACCCAGAGATAATGTCTTATTTAC  
ATTCTATGAATGAGTCCCTTTTTGGATGAGTGGAATTTTGGGGTTGTGCCCCCTCCCTCCA  
CAAGTTTGGAGGATACCTACCGTTTCTGCAGTCCCGTGCCATTACGTGCCAAAAAGGGG  
CTACTGCACCACAGCCTAAAGAGGATCCCTATGCTGGCATGGTGTGTTTGGGAGGTTGACC  
TTAAGGACAAGTTGTCCACTGATTTGGACCAATTTCCACTGGGCCGCAAGTTTCTATTGC  
AGTCGGCCCCACGGGTCTCGCATGTGTCCCGCAAGCGTCCCGCATCTACCTCTACTGCCT  
CCTCCTCCAAACGTCGCAAACTAAAAAATAGTGTGTGTGTGCTGTACTGTCTTGTTTGT  
ATGTGTGTCTGTATTGTGTACTGTTGTTGGTTGCACTGTGTTGTGTATATGTATGTGTAT  
ATGTATGTGTTTTTTGTATGTGTTGTGTAATGTCCTTTATGTGCCCCGTGATTGTTGTGC  
TTTTGTCTTGTTGTGTATTTTGGTGTGTATGTATTTATGGAATGTGTGTTATGTTGTGGA  
TCAGTAAAGTATGTGTGTCTATTGTGGGGTTCATGTCCGGCAGCACCCCTGTGAGTAAGTGT  
GCATTTGTACACACCTTGCACTCGGCTACATATCCACCATTTCTGCACTTATTTTGTAC  
CCGTACTCCATTTTGTATGCGACCGAAATCGGTCTCCCGCCTTTTCGGTCTGTGTTATGG  
CACCTTCCCAGGTACACCTAATCCTTTGGCAGCCCTACATCCTGCGTAGGCAGCTGCAAA  
CCTTCCACACCTAGGTGTGTCTGACAGCTCTATACATAAAGTAATAAAAATATGGTTTGTA  
GTTTATAGGTTTTACTTACTCATCTGCAAGAAATATGCTTTTAGGCAATGCTTTGGCTAC  
CAACTTTCCCTTAAGTGCATAGTTGGCAGTCTGTACTACATTGTACTGCCAAGTTTCTGT  
CCTATAAACCTTTAAACAACCTTATGTAACCAACACAACCTCGGTGCTGTATTATTCATAG  
TTCCTTCTTTTACTTAAACAACATCATGTAGTTAAAAAATAAGGAGGGACCGAAAACGG  
TGCGACCGAAAAGGGATACATATATAAGGGCAGCTAAGGGCAGTGGAAGGCAACGGGACA  
GCC

>gi|6002612|gb|AF092932.1|AF092932\_HumanPapillomavirus\_type\_6,\_complete\_genome

GTTAATAACAATCTTGTTTTAAAAAATAGGAGGGACCGAAAACGGTTCAACCGAAAACG  
GTTGTATATAAACAGCCCTAAAATTTAGCAAACGAGGCATTATGGAAAGTGCAAATGCC  
TCCACGTCTGCAACGACCATAGACCAGTTGTGCAAGACGTTTAAATCTATCTATGCATACG  
TTGCAAATTAATTGTGTGTTTTTGCAAGAATGCACCTGACACTGCAGAGATTTATTCATAT  
GCATAGAAACAGCTAAAGGTCCTGTTTCGAGGCGGCTATCCATATGCAGCCTGCGCGTGC  
TGCCTATAAATTCATGGAAAAATTAACCAATATAGACACTTTGATTATGCTGGATATGCA  
ACAACGTGTTGAAGAAGAACTAAACAAGACATTTTAGACGTGCTAATTTCGTGCTACCTG  
TGTCACAAACCGCTGTGTGAAGTAGAAAAAGGTAAAACATATACTAACCAAGGCACGGTTC  
ATAAAGCTAAATTTGTACGTGGAAGGGTCGCTGCCTACACTGCTGGACAACATGCATGGAA  
GACATGTTACCCTAAAGGATATTGTATTAGACCTGCAACCTCCAGACCCGTAGGGTTAC  
ATTGCTATGAGCAATTAGTAGACAGCTCAGAAGATGAGGTGGACGAAGTGGACGGACAAG

ATTACAAACCTTTAAAACAACATTACCAAATAGTGACCTGTTGCTGTGGATGTGACAGCA  
ACGTTTCGACTGGTTGTGCAGTGTACAGAAACAGACATCAGAGAAGTGCAACAGCTTCTGT  
TGGGAACACTAAACATAGTGTGTCCCATCTGCGCACCGAAGACATAACAACGATGGCGGA  
CGATTCAGGTACAGAAAATGAGGGGTCTGGGTGTACAGGATGGTTTATGGTAGAAGCTAT  
AGTGCAACACCCAACAGGTACACAAATATCAGACGATGAGGATGAGGAGGTGGAGGACAG  
TGGGTATGACATGGTGGACTTTATTGATGACAGCAATATTACACACAATTCCTTGGAAGC  
ACAGGCATTGTTTAAACAGGCAGGAGGCGGACACCCATTATGCGACTGTGCAGGACCTAAA  
ACGAAAGTATTTAGGTAGTCCATATGTTAGTCCTATAAACACTATAGCCGAGGCAGTGGA  
AAGTGAAATAAGTCCACGATTGGACGCCATTAACTTACAAGACAGCCAAAAAAGGTAAA  
GCGACGGCTGTTTCAAACCAGGGAACTAACGGACAGTGGATATGGCTATTCTGAAGTGGA  
AGCTGGAACGGGAACGCAGGTAGAGAAAACATGGCGTACCGGAAAAATGGGGGAGATGGTCA  
GGAAAAGGACACAGGAAGGGACATAGAGGGGGAGGAACATACAGAGGCGGAAGCGCCAC  
AAACAGTGTACGGGAGCATGCAGGCACAGCAGGAATATTGGAATTGCTAAAATGTAAAGA  
TTTACGGGCAGCATTACTTGGTAAGTTTAAAGAATGCTTTGGGCTGTCTTTTATAGATTT  
AATTAGGCCATTTAAAAGTGATAAAACAACATGTGCAGATTGGGTGGTAGCAGGATTTGG  
TATACATCATAGCATATCAGAGGCATTTCAAAAATTAATTGAGCCATTAAGTTTATATGC  
ACATATACAATGGCTAACAAATGCATGGGGAATGGTATTGTTAGTATTATTAAGATTTAA  
AGTAAATAAAAGTAGAAGTACCGTTGCACGTACACTTGCAACGCTATTAAATATACCTGA  
AAATCAAATGTTAATGAGGCCACCAAAAATACAAAGTGGTGTTCAGCCCTGTATTGGTT  
TCGTACAGGTATATCAAATGCCAGTACAGTTATAGGGGAAGCACCAGAATGGATAACACG  
CCAACTGTATTGAACATGGGTTGGCAGACAGTCAGTTTAAATTAACAGAAATGGTGCA  
GTGGGCATATGATAATGACATATGCGAGGAGAGTGAAATTGCATTTGAATATGCACAAAG  
GGGAGATTTTGATTCTAATGCACGAGCATTTTTTAAATAGCAATATGCAGGCAAAATATGT  
GAAAGATTGTGCAACTATGTGTAGACATTATAAACATGCAGAAATGAGGAAGATGTCTAT  
AAAACAATGGATAAAACATAGGGGTTCTAAAATAGAAGGCACAGGAAATTGGAACCAAT  
TGTACAATTTCTACGACATCAAAATATAGAATTTATTCCATTTTTTAAGTAAATTTAAATT  
ATGGCTGCACGGTACGCCAAAAAAAACATGCATAGCCATAGTAGGCCCTCCAGATACTGG  
GAAATCGTACTTTTGTATGAGTTTAATAAGCTTTTTTAGGAGGTACAGTTATTAGTCATGT  
AAATTCCAGCAGCCATTTTTGGCTGCAACCGTTAGTAGATGCTAAGGTAGCATTGCTAGA  
TGATGCAACACAGCCATGTTGGATATATATGGATACATATATGAGAAATTTGTTAGATGG  
TAATCCTATGAGTATTGACAGAAAGCATAAAGCATTGACATTAATTAATGTCCACCTCT  
GCTAGTAACATCCAACATAGATATTACCAAAGAAGAGAAATATAAGTATTTACATACTAG  
AGTAACAACATTTACATTTCCAAATCCATTCCCTTTTTGACAGAAATGGGAATGCAGTGTA  
TGAAGTGTCAAATGCAAATGGAATGTTTTTTTTGAAAGACTGTCGTCAAGCCTAGACAT  
TCAGGATTACAGAGGACGAGGAAGATGGAAGCAATAGCCAAGCGTTTAGATGCGTGCCAGG  
AACAGTTGTTAGAACTTTATGAAGAAAACAGTACTGACCTAAACAAACATGTACTGCATT  
GGAAATGCATAAGACATGAAAGTGATTATTATATATAAAGCAAAACAAATGGGCCTAAGCC  
ACATAGGAATGCAAGTAGTGCCACCATTAAAGGTGTCCGAAGCAAAAAGGACATAATGCCA  
TTGAAATGCAAATGCATTTAGAATCATTATTAAAGACTGAGTATAGTATGGAACCGTGGA  
CATTACAAGAAACAAGTTATGAAATGTGGCAAACACCACCTAAACGCTGTTTTAAAAAAC  
GGGGCAAAACCTGTAGAAGTTAAATTTGATGGCTGTGCAAACAATACAATGGATTATGTGG  
TATGGACAGATGTGTATGTGCAGGACACTGACTCCTGGGTAAAGGTGCATAGTATGGTAG  
ATGCTAAGGGTATATATTACACATGTGGACAATTTAAAACATATTATGTAAACTTTGTAA  
AAGAGGCAGAAAAGTATGGGAGCACCAAAACAATGGGAAGTATGTTATGGCAGCACAGTTA  
TATGTTCTCCTGCATCTGTATCTAGCACTACACAAGAAGTATCCATTCTGAATCTACTA  
CATACACCCCCGCACAGACCTCCACCCCTGTGTCTCAAGCACCCAGGAAGACGCAGTGC  
AAACGCCGCCCTAGAAAACGAGCACGAGGAGTCCAACAGTCACCTTGCAACGCCCTTGTGTG  
TGGCCACATTGGACCCGTGACAGTGGAAACCACAACGTCATCACTAACAATCACGACC  
AGCACAAGAAGGAACAACAGTAACAGTTCAGCTACGCCTATAGTGCATTTCAAGGTG  
AATCTAATTTGTTAAAGTGTTTTAGATATAGGCTAAATGACAAACACAGACATTTATTTG  
ATTTAATATCATCAACGTGGCACTGGGCCTCCTCAAAGGCACCACATAAACATGCCATTG  
TAACTGTAACATATCATAGTGAGGAACAAAGGCAACAGTTTTTTAAATGTTGTAAAAATAC  
CCCCTACTATTAGACACAACTGGGGTTTATGTCAATGCACCTATTGTAATTTGTATATA  
TGTAATGTGTAAATATATGGTATTGGTGTAAATACAACGTGACATGTATGGAAGTGGTAC  
CTGTACAAATAGCTGCAGGAACAACCAGCACATTAATACTGCCTGTTATAATTGCATTTG

TTGTATGTTTTGTTAGCATCATACTTATTGTATGGATATCTGACTTTATTGTGTACACAT  
CTGTGCTAGTACTAACACTGCTTTTATACTTACTATTGTGGCTGCTATTAACAACCCCT  
TGCAATTTTTCCTACTAACTTTACTTGTGTGTTACTGTCCCGCTTGTTATATACACCACT  
ACATTGTGAACACACAGCAATGATGCTAACATGTCAATTTAATGATGGAGATACCTGGCT  
GGGTTTGTGGTTGTTATGTGCCTTTATTGTAGGGGTGTTGGGGTTATTATTAATGCACTA  
TAGAGCTGTACAAGGCGATAAACACACCAAATGTAACAAGTGTAAACAAACACAACCTGTAA  
TGATGATTATGTAACATATGCATTATGATACTGCTGGTGATTATATATATATGAATTAGAG  
TAAAACTTTTTTTATATTTGTAACAGTGTATGCTTTGTATACCATGGCACATAGTAGGGC  
CCGACGACGCAAGCGTGCGTCAGCTACACAGCTATATCAAACATGTAAACTCACTGGAAC  
ATGCCCCCAGATGTAATTCCTAAGGTGGAACACAACACCATTGCAGATCAAATATTTAAA  
ATGGGGGAGTTTGGGGGTGTTTTTTGGAGGGTTGGGTATAGGCACCGGTTCCGGCACTGG  
GGGTGCTACTGGCTATGTTCCCTTAGGAACCTCTGCAAAACCTTCTATTACTAGTGGGCC  
TATGGCTCGTCCCTCCTGTGGTGGTGGAGCCTGTGGCCCCCTTCGGATCCATCCATTGTGTC  
TTTAATTGAAGAATCGGCAATCATTAACGCAGGGGCGCCTGAAATTGTGCCCCCTGCACA  
CGGTGGGTTTACAATTACATCCTCTGAAACAACCTACCCCTGCAATATTGGATGTATCAGT  
TACTAGTCATACTACTACTAGTATATTTAGAAATCCTGTCTTTACAGAACCTTCTGTAAC  
ACAACCCCAACCACCCGTGGAGGCTAATGGACATATATTAATTTCTGCACCCACTATAAC  
GTCACACCCCTATAGAGGAAATTCCTTTAGATACTTTTGTGATATCCTCTAGTGATAGCGG  
TCCTGATCCAGTACCCTGTTCCTGGTACTGCACCTCGGCCCTCGTGTGGGCCTATATAG  
TCGTGCATTGCAACAGGTGCAGGTTACAGACCCCTGCATTTCTTTCCACTCCTCAACGCTT  
AATTACATATGATAACCTGTATATGAAGGGGAGGATGTTAGTGTACAATTTAGTCATGA  
TTCTATACACAATGCACCTGATGAGGCTTTTATGGACATAATTCGTTTGCACAGACCTGC  
TATTGCGTCCCGACGTGGCCTTGTGCGGTACAGTCGCATTGGACAACGGGGGTCTATGCA  
CACTCGCAGCGGAAAGCACATAGGGGGCCCGCATTTCATTATTTTTTATGATATTTACCTAT  
TGCACAAGCTGCAGAAGAAATAGAAATGCACCCCTCTTGTGGCTGCACAGGAAGATACATT  
TGATATTTATGCTGAATCTTTTGAACCTGACATTAACCCTACCCAACACCCCTGTTACAAA  
TATATCAGATACATATTTAACTTCCACACCTAATACAGTTACACAACCGTGGGGTAACAC  
CACAGTTCATTTGTCAATTCCTAATGACCTGTTTTTACAGTCTGGCCCTGATATAACTTT  
TCCTACTGCACCTATGGGAACACCCCTTTAGTCCTGTAACCTCCTGCTTTACCTACAGGCC  
TGTTTTTCATTACAGTTCTGGATTTTTATTTGCATCCTGCATGGTATTTTGCACGTAAACG  
CCGTAAACGTATTCCCTTATTTTTTTTCAGATGTGGCGGCCTAGCGACAGCACAGTATATG  
TGCCTCCTCCTAACCTGTATCCAAAGTTGTTGCCACGGATGCTTATGTTACTCGCACCA  
ACATATTTTATCATGCCAGCAGTTCTAGACTTCTTGCAGTGGGTGATCCTTATTTTTTCCA  
TAAACGGGCTAACAAAACCTGTTGTGCCAAAGGTGTCAGGATATCAATACAGGGTATTTA  
AGGTGGTGTACCAGATCCTAACAAATTTGCATTGCCTGACTCGTCTCTTTTGTATCCCA  
CAACACAACGTTTGGTATGGGCATGCACAGGCCTAGAGGTGGGCAGGGGACAGCCATTAG  
GTGTGGGTGTAAGTGGACATCCTTTCTTAAATAAATATGATGATGTTGAAAATTCAGGGA  
GTGGTGGTAACCTGGACAGGATAACAGGGTTAATGTTGGTATGGATTATAAACAACAC  
AATTATGCATGGTTGGATGTGCCCCCTTTGGGCGAGCATTGGGGTAAAGGTAAACAGT  
GTACTAATACACCTGTACAGGCTGGTGACTGCCCCCCTTAGAACTTATTACCAGTGTTA  
TACAGGATGGCGATATGGTTGACACAGGCTTTGGTGCTATGAATTTTGTGATTTGCAGA  
CCAATAAATCAGATGTTTCCTATTTACATATGTGGCACTACATGTAAATATCCAGATTATT  
TACAAATGGCTGCAGACCCATATGGTGATAGATTATTTTTTTTTTCTACGGAAGGAACAAA  
TGTTTTGCCAGACATTTTTTTTAAACAGGGCTGGCGAGGTGGGGGAACCTGTGCCTGATACTC  
TTATAATTAAGGGTAGTGGAATCGAACGTCTGTAGGGAGTAGTATATATGTTAACACCC  
CAAGCGGCTCTTTGGTGTCTCTGAGGCACAAATGTTTAAATAAGCCATATTGGCTACAAA  
AAGCCCAGGGACATAACAATGGTATTTGTTGGGGTAATCAACTGTTTGTTACTGTGGTAG  
ATACCACACGCAGTACCAACATGACATTATGTGCATCCGTAACCTACATCTTCCACATACA  
CCAATTCTGATTATAAAGAGTACATGCGTCATGTGGAAGAGTATGATTACAAATTTATTT  
TTCAATTATGTAGCATTACATTGTCTGCTGAAGTAATGGCCTATATTACACAATGAATC  
CCTCTGTTTTTGAAGACTGGAACCTTTGGGTATCGCCTCCCCAAATGGTACATTAGAAG  
ATACCTATAGGTATGTGCAGTCACAGGCCATTACCTGTCAAAAGCCCCACTCCTGAAAAGG  
AAAAGCCAGATCCCTATAAGAACCTTAGTTTTTGGGAGGTAAATTTAAAAGAAAAGTTTT  
CTAGTGAAATTGGATCAGTATCCTTTGGGACGCAAGTTTTTGTACAAAAGTGGATATAGGG  
GACGGTCTCTATTTCGTACCGGTGTTAAGCGCCCTGCTGTTTCCAAAGCCTCTGCTGCC

CTAAACGTAAGCGCGCCAAAACCAAAGGTAATATATGTGTATATGTACTGTTATATATA  
TGTGTGTATGTACTGTTATGTATATGTGTTTATGTACTGTTATATGTGTGTATATATGTG  
TATGTGTGTATATGTATATGTATGTGTGTGTGTATATATATGTGTGTGTGTGTTATGTGTG  
TAATGTAATTTATTTGTGTAATGTGTATGTGTGTTTATGTGCAATAAACAACTAACTACA  
TTATTGTATATCTTGTTACACCCTGTGACTCAGTGGCTGTTGCACGCGTTTGGTTTGCA  
CGCGCCTTACACACATAAGTAATATACATGCACAATATATATATTTTTGTTTCCAATAAT  
ATATTTTTTATATTTGCAACCGTTTTTCGGTTGCCCTGGCATACTTTCCACCAATTTGT  
TACAACGTGTTGCCTGTTAATCCTATATATTTTTGTGCCAGGTACACATTGCCCTGCCAAG  
TTGATTGCCAAGTGCATCATATCCTGCCAACACACACCTGGCGCCAGGGTGCGGTATTG  
CCTTACTCATATGTTTTATTGCCACTGCAATAAACCTGTCTTTGTGTTATACTTTTATGCA  
CTGTAGCCAACTCTTAAAAGCATTTTTGGCTTGTAGCAGCACATTTTTTTGCTCTTACTG  
TTTGGTATACAATAACATAAAAAATGAGTAACCTAAGGTCACACACCTGCAACCGGTTTCG  
GTTATCCACACCCTACATATTTCTTCTTATA

>gi|5059324|gb|AF151983.1|AF151983\_Human\_papillomavirus\_type\_83,\_complete\_genome

ATGTCAGGAGTGCAGTACCCACCAACATATTTCTGCTGTGCAAAGACTGCGAGGTGGAT  
TTGGAAGACTTACGACTGATTTGCATTTATTGCACAAATGAATTAACAACAGCAGAAGTG  
CTGTCCTTTGCATGGAAGGAGCTGTGTATTAAGTGGGACCACGAAGTGCCTACGGAGCG  
TGTGCACAGTGTCTACGTAAAGCAGCAAAGGTGCGAGAGCTACGGCACTGGAGCCACTCA  
AGCTACGGGGCAACAGTAGAAGAAAGAAACAAACCACTGGCACAGCTGTATATACGA  
TGCCATATGTGCCCTGAAGCCGTTGAGTAGTCAAGAAAAAGAATATTTGGTGCAAACAGGT  
GATAGACTTCATAATATAGCAGGACAGTGGACAGGACGGTGCTGCCATTGTAGGGCACCA  
TGCACGGCCATACAGCAACAATAGCAGAGATTGTACTAGAAGAAATACCAGATATAGTTG  
ACCTATATTGTAATGAACAAGGTATAGACAGCTCAGAGGAGGAGGATGATAGGGACTGTG  
GCGTGCGTGACCAACTGGCAGAACAAGCAAAGCAGGCCTATAGGGTGTTAACAGTGTGTG  
GTATGTGTGGCCAGGCACTTAGACTAGCAGTGCTGTGTGAAGACGCAGACCTAAAACGTC  
TACAGGACCTTTTGGTGAATGCAGTGATATAGTGTGTCCCGGCTGTGCATAAGGACATG  
GCGGATACGGAAGGTACAGATACTGGGACTGGGGAATTTAATACAGTAACCGGGGCAGGA  
GGGTGGTTTATGGTGAAGCAATAGTGGACAAAACAACAGGAGATACAGTGTCAAGTGAT  
GAGGACGAGGAGCTAACAGATAATGGAGAAGACCTTGTAGACTTTATAGACAGACACCCG  
GGGGATGGGCAGGAAGTTCGGTTAGAGCTCTTTGTTCAACAACTGCAGAGGATGACGCT  
GCAATAGTGCAGGCAGTAAAACGAAAGTTTGTATGTAGTCCTGCATCAAGTTCCTGTGCA  
ACATGGGTGGACAGTGAACCTAAGTCCCGTTTGGACGCTATAAACTTAAATAGAAGACAG  
GAAAAGGCTAGACGGAGGTTGTTTGTAGCAGGACAGTGGGTATGGCAATACGCAGGTGGAA  
ACTGGAACATCAGAAAGTCAGGTACCCGGGGAAAATGAAGGCGTGGGGGGGGCTGTGGCG  
GCACAGGAAACGAGGGGGGAGGGGCGGGAGGGGGGCGACGGCGAATCACAACCGCCTGTG  
CAGGTACAGCAAACACAGGACAGAGCGCCAGAACTACTGGAGCTGTTTAAATGCAGTAAT  
GTAAGAGCCGCCATCTTAAGTAAGTTTAAAGATTTATTTGGTCTATCATTTTATGATCTA  
GTTAGACAGTTTAAAAGTGATAAATCCATATGTGGAGACTGGGTGGTGTGTGCATTTGGG  
GTGTACTATGCCGTAGCAGAAGCTGTGAAAACGTTGCTGCAGCCACAATGTTTATATGCA  
CATATACAGGTGCAAGCCAGCCAATGGGGAATGGTAGTACTAATGCTACTAAGATTTAAA  
TGTGGCAAAAGCCGGGAAACAGTGGCTAAAATACATGGGTACCGTACTAAATGTACCCGAA  
AAGCATATGCTAATAGAACCACCAAAAAATACGTAGCGGGCCATGTGCACTATACTGGTAT  
AGAACAGCTATGGGGAATGCCTCAGAAGTACTTGGGGAGACCCAGAGTGGATTGTGCGA  
CAAACAGTAGTAGGACATGCAATGGGAGAAGCCCAATTTAGTTTATCAATGCTTGTGCAG  
TGGGCATATGATAACGATATCCAGGAGGAAAGCGACCTAGCATAACGGGTATGCACAGTTG  
GGAAATACAGATCCCAATGCAGCTGCATTTCTAGCAAGTAATTGTGAGGCAAAATATATT  
AAGGATGCAATGACAATGTGTAGGTTGTATCGGCGAGCGGAACAATCCAGAATGAGTATG  
GCACAGTTGGATAGCGCATAGGGGGCGTAAGGTAGCAGACACAGGAGATTGGAAACATATT  
GTGAAATTTTAAAATATCAAAATGTGGAATTTTATTTTCAATTTATTAGTGCATTTAAATTG  
TTTTTAAAGGGAGTGCCTAAAAAAGCTGTTTAGTATTCTATGGACCTAGTGACACAGGG  
AAATCATTTGTTTGTATGAGCCTTTTGCAATACCTAGGGGGCGCAGTTATATCTTATGTA  
AATTCAAGCAGCCATTTTTGGTTGTCCCCATTAGCAGATGCTAAAAATAGGATTGCTAGAT  
GATGCAACACGCGCAATGCTGGACCTACATAGATGTATATTTGCGCAGCATATTAGATGGG  
AATCCAACAAGCATTGATAGAAAACATAGAACACTGACACAGCTAAAAGTGGCCACCACTA  
ATGATAACTACTAATGTAGATCCACTGGCAGATGAGTCCCTAAAGTATCAACGCAGTAGG

ATTACAGTGTTTAAATTTTTTAAACAAATGTCCGGTAACCAACAGCGGGGAAGTAGTGTAC  
ACACTAAATAACGAAACCTGGAAATCATTTTTCCAAAGGTCCTGGGCACGTTTAGAATTG  
CATCAAGAGGAGGAGGAGGAGGAGGAGGAGGATGGCATCGCTAGCCGACCGTTTAGA  
TGCGTGCCAGGAGACGCTAATAGACCTTTATGAAAAAGATAGCAACAAGTTGGAGGACCA  
GTTGTTGCATTGGCAATGTGTGCGTTTGGAACATGCAATATTATTTAGGGCAAAGGAAGC  
AGGACATGCAAAAAGTAGGCCACCAGGTGGTGCCACCACCTTCATGTAACCAAATCAAAGGC  
CTGTCAGGCCATTGCAGTCCATTTATCGTTGCAAAGCCTAAATGACAGTGACTTTAAGCA  
CGAACCATGGACACTGCAGGACACATCTATGGAAATGTGGAACACACCCCCGCAGGGGTG  
CTGGAAGAAAAAGGGACGCACAGTAACAGTGAGATTTGATAAAAGTGACTGTAATGAAAT  
GGACTATGTAAGCTGGGGGCACATATATGTATATACGGAGGAAACAAGGACATGGCACAA  
AGTGTCTGGGGGGTGTGGATTACGCGGGGACTGTATTATGAGGTGCAGGGACAGAAACAGTA  
CTATGTGGAGTTTGTAAAGGAGGCCCAAAAATATGGGACGCAAAACATGTGGGAGGTGCA  
TGTGGGCAACAATGTTATTCACCAACCATGCGACTCTGTATCTAGCACCCAGGACACCGT  
GTGGGAAGTACCCCTTGCTGCAACTAGTACCAGGCTACCACACACCCGAGACCCCCACCGC  
CAGCACCCAGGTGCTGGGCGCCCCCAGAGCACCACCCAAGTGCAGACGCCGCCCTGTCAA  
GCGACAGCGACTCCTCTGGGACGGACAGCAGCAGCCCGACTCAACCCAGACAGAGCACCA  
AAAGCACGTGGACAGTGGTGCCTACGGACACAGCAGTGACAGTGTCTGCACAAACGCCAC  
AAGGGACACAGTGAACCGTTACCATAACCTGTAATCCACCTACAAGGTGAACCAAATAA  
ACTAAAGTGCTTTAGGTACAGATTACATAAATCAGTACCAACATTGTTTGTAAAGGGCCAC  
CTCCACATGGCATTGGACAAGTGGGGATGCCGCCACTAAAGCAGCATTGTGTAACCTTATG  
CTATGCAAGTATAGAGCAACGGGAGCTATTTCTAACCAGGGTTACAATTCCAAAGGGTAT  
AAAGGCAATGCAAGGATATATGTCTATGTGCTTTTAACTGTACATATGTATATATATATA  
TAGTGTGTAATACGGGTATGTAACCAATAGTGTATAAGTGTGTTTGCAAATACCTGAGCC  
ACTATACACCACACCATATACCAGTACAACCCCTGGATTACATATTGTGCTTGATTTGTTT  
GTGGTGTATATTCTTGTGCTTCTAATTTGCTTCTGGCTTTCCTACCTTTCTGCATTTGT  
GGCATTGTGTTGTGTTTATGTGTATATTGTATTTGGGGTTGTTATTGCTATATGTACAAGT  
ATTGTGGTGTATAGGGTTTATATAACCACACAACCAGCCATTCACTGCTGCTACCTGTAT  
ATACGTATTCCTGTGTATTGTACAATCACTATGTATCCATTGGAGGCTAGAGGTGGGGG  
GCAGGCATATGATTTAATTGTTATTGGCCGGGACGAAGTGGGATTACTGCTTATTATTTT  
AATTCTCATCGTAATTATTATTATTTTGTGCTGTACATGCGGCTACTACATATGTAACCACC  
TCCCTTCTGTATACCACATGTAGGGTATTGTTTTGTACTGTTTGTTTTTTACTTTCTT  
ATTGGCAATAAACATAGTTATATATACAATGTCCCATGTGCATAGGCGGCGCAAAGGGC  
GTCTGCAACTGATTTGTACCGTACCTGTAAGGTTGCAGGTACATGCCCCCTGATATAGT  
CCCTAAAATTGAAGGTGACACATGGGCCGATAGGTTTTTAAAGTGGGCAAGCCTGGGGCT  
GTTCTTTGGACGGCTTGGCATTGGTACGTCCTCTGGCACCAGGTGGTGCACAGGCTATGT  
GCCCTAGGTACCCGTCTCCACGGTGGTTGACGTAGGGCCCACAGCGCGCCCCCTGT  
GGTCATTGAACCTGTGGGTGCCACTGAACCATCCATTGTTAACCTTGTGGAGGATTCTAG  
TGTTATTGAGTCTGGGGCTACTATACCTACCTTTACGGGCACACATGGCTTTGAGGTTAC  
TAGTTCTCTCACTACAACCCCCGCAGTATTGGATATAACGCCGTGCTCCGCCACGGTACA  
GGTTAGCAGCTCTAGTTTTACCAATCCTTTATTTACTGAGCCGTCCATAATTGAGCCTCC  
ACAACATGGTGACATTACAGGACATGTGTTTACTAGTACCGCTACATCTGGTACTCACGG  
GTTTGGAGGAAATTCCAATGCAAACATTTGCAACCTCTGGGGGTACAGGCCAGGAACCTAT  
TAGTAGTACTCCTATTCTGGGGTACGCCGTGTTGCGGGTCTCTCGCCTAGGCCTTTACAG  
CCGTGCCACATCTCAGGTTAAGGTGCCTGATTCTGCCTTTATGTCCCGCCCTGCATCTTT  
TGTAACATATGACAATCCTGTATTTGATCCTGATGAACTATTATATTGAAACACCCTAG  
TTTACATAATCCACCCGATCCTGATTTTCTGGATATTGTTTCATTACATAGGCCTGCCTT  
AACAGCCAGACAAGGTACTGTGCGGGTGAGTCGTGTTGGCCAAAGGGCTACCTTGCGTAC  
CCGTAGTGGCAAACAATCGGGGCCCGTGTACATTTCTATCATGATATTAGCCCCATTCC  
GCCACGGAGATCCATTGAGCTACAGCCCTTGGAACCCCTCCGTGGCAAACACCTCCTTATA  
TGACATATGTCAGATGATGTTTTTTTTGGAGTCCCTCGGTGCCCTGCGGCCATCCCCCTC  
ATCCACCTCTGTCTCTTGACGTCCACTAATGTTTCTGCTACCTCTGCTGTGACTGCACA  
GTATGACAATGTTACAGTGCCACTGTCCCCTGGAATTGGATGTACCTGCCCTTTCAGGCCC  
TGACATACACGGTGCTGCTCATATGCCTGCAGACCCTTCTGTTCTGTGCCATCTAATAT  
TCCTATTCACTGTGTGTTTATAGACGGTACTGACTATTATTTATTGCCTAACTACATTTT  
TTTCCCTAAAAACGTAAACGTGTGCACTATTCTTTTGCAGATGGCTATGTGGCGGCCTG



GTGACGGCAAGACGTACTTGCCCTCCCACTCCTGTGTCTAAGGTTATCAGTACGGACCGTT  
ATGTTACACGCACCAACCTCTTTTATTACGGTGGCAGCTCCAGACTTCTTACCGTAGGAC  
ATCCATATTATCCTGTACAGGTTAATGGTCAAGGAAAAAAGCCACTATCCCAAGGTTT  
CTGGCTACCAATATAGGGTGTTCGCATTAGATTACCTGACCCTAATAAGTTTAGCCTTC  
CTGATACGTCCCTATATAATCCTGACACGGAACGCATGGTATGGGCATGCCGCGGTATAG  
AGGTTGGTTCGTGGTCAGCCTCTTGGCGTGGGCACCTAGTGGCCATCCCCCTATATAATCGGC  
TGGATGACACTGAAAACACACCATTGCTTGCTGCTGCAGACACAGATAGGCGTGACAATG  
TCTCAGTGGATTACAAACAAACGCAGCTTATTATCATTGGGTGTAAGCCCCAATAGGGG  
AACACTGGGCAAAGGGTACTGTGTGTTCCGGTGTGTCCCCGCAGCGTGGCGATTGTCCCC  
CCCTACAGTTTGTAAATTCTACTATACAGGATGGCGACATGGTGGAAACAGGCTATGGTG  
CCATGGATTTTGGCACCTTACAGGAATCTAAGTCTGAGGTTCCCTATTGATATCTGCACTG  
CCACCTGTAAATATCCTGATTATTTACAAAATGGCTGCGGAACCATATGGTGATTGTATGT  
TCTTTTGCCTCCGTAGGGAACAAATGTTTGACAGACATTTTTTTAATAGGCATGGCACTA  
TGGGCGAGGTGCTGCCTACCTCTTATTATATTTCCAGGCACATCTGCTAATAGTAGGAACA  
CTCTTACCAGCTACATCTATGCTCCTACTCCTAGTGGCTCCCTGGTATCGTCCGATTCCC  
AACTATTTAATAAGCCCTACTGGCTGCATCGTGCCAGGGACATAATAATGGCATTGTGT  
GGTTTAATGAGTTATTTGTTACAGTTGTAGATACTACCCGCAGTACCAATATTACTATTT  
CAGCTGCTGCTACACAGGCTAATGAATACACAGCCTCTAACTTTAAGGAATACCTCCGCC  
ACACAGAGGAATATGCTTACAGGTTATATTGCAACTTTTGCAAAATACATCTGACCCCTG  
AAATTATGGCATACCTACATAGTATGAATGAACATTTATTAGATGAGTGGAATTTTGGCG  
TGTTACCGCCCTCCCTCCACCAGCCTTGATGATACCTATCGCTATCTGCAGTCCCGTGCTA  
TTACCTGCCAAAAGGGTCCTTCCGCCCTTGCCCTAAAAAGGATCCTTATGATGGCCTTG  
TATTTTGGGAGGTTGATTTAAAGGACAAACTATCCACAGATTTAGATCAGTTTCCTTTGG  
GCCGTAAGTTTCTTTTGCAACTGGGTCCCCGTTCTGTGTCTGTGTCTCGTAAGCGCCCTG  
CCTCTACCGCCCCGTCTGCCCTTCTAAGAAAAAGGTTAAAAGGCGCAAGTAACATATGT  
GTGTGTGTGTTTGTGTGTATATCTGTGTTTGTGTCAGTGTTATGCCTATATGCGGTGGTAT  
GCCTTTGTGTTATGTATGTGGCAGTACCGTTGTATGTGTTTGTGTATTATATGTTTGTGC  
ATGTATCTGTGTTTTGTCTGTGTAGTATGTGTATGTATCTGTGTGTTTTGTATGTGTATA  
CATTGTGGAATGTATGTGTTGTGTGTGCTTTAATAAACTGTGTGTCAATTGTGTTGCCGTG  
GACTAGTGTCCGGCTGCGCCCCGTGCAGTGTCCGGCTGCACCCCATGAGTAACCCCTCCA  
TGGCACCTATGTCCTGCACCACCCTATAGTTCCCTGACCCCGTAGGTTACTAGTTCCTTTT  
GTGTTGGCGCGACCGGTTTCGGTCTCCCGCCTTTTCGGTCTTTGCAGTGGCACGTTGCCA  
TTACACACAATGGTAAGTAATCCCTTATTAACCTCATATCCTGCATACTTTCTGTGCCAAC  
TATTTGCACCTGGGAGTGCCTGACAGTTTGTGTTGGCTGCACAATATGATTTTTTTGACAGGC  
TTATATTGTACTTGTACTTCTTTTGCATAAAACTGCTTTTAGGCACATACTTTTTCATGA  
CTACTTTCCCTAAGTACTGTTTTGGACATGTAGACTATTGCAGTAGCCAACCTATGTGTC  
TATCCAGTAATCCTGCAGTTCTAAACTTGTTGCACACACCAGGTCGGTTACTACCTACA  
CAGCACTTTCTTTGTAATAATTTATAACAATCACATAGTAAAAAAGTAGGGTGTAACCG  
AAATCGGTCGGACCGAGGGGTATACATATAAAAGGGAAGTGTAGGCTCAGCACAGCCAGG  
AGCT

>gi|12958167|gb|AF293960.1|AF293960\_Human\_papillomavirus\_type\_84,\_complete\_genom  
e

ATGCCCCACGGACGCTACCACCCCACCAATATTTTTGTGCTGTGCCAGGAATACGAGGTG  
GAGTTTCGACGACCTACGATTAATTTGCATCTTTTGCAGGAAGAATTAACGGAAGGCGAA  
GTGCTGGCCTTTGCAGTAAAGGAATTACTAATTGTTTGGAGGTATAATTCCCTCATGGG  
GTGTGCATGAAATGCTTATGCAGGGAAGCCAAAGTACGTGAGCTACGCCACTGGGATTAC  
TCCAGCTTTGGACCAACAGTGGGAAGAAAGAACAGGATTACCACTTGCACAAATAAATATA  
AGGTGCCACGCGTGTGCAAGCCATTGTGCTATCAGGAAAAGGAGTATATGGTGGAATTG  
CAGTTGCTATTCCACAAAATAGCTGGACAGTGGACAGGGAAGTGCTGCAACTGTAGGGTA  
ACATGCGCGGCCAGACGCCAACGTTAAAGGATATTATTTTAACAGATATACCAGATGTAG  
TTAGTTTATACTGTGACGAGCAATTGTTAGACAGCTCAGAGGAGGAGGATAATGGGGATT  
GCTTGCGTGACCAACCTGCAAAACCAGCACAGCTGGCCTATAGGGTGGTAACAGAGTGTG  
GGTTGTGTAGCCGTCCAGTTAGGCTGGCGGTGCTTTGTGGAGTGGAAGACCTCAGAAAGC  
TGCAGCAGCTTATAGTGGAAGCAGTGGCCATAGTGTGTCCCGGCTGTGCATAATATGGCA  
GAGTCACCTGAAGGTACCGATGGGGGGACTGGCGGGGGGGCTGGGGGATGGTTTGTGGTG

GAAGCCATGGTACACCAGGCAAACACCGATGTGTCTAGCGATGAGGACGAAACACGTATA  
GATACAGGAGAAGATTTGGTAGACTTTATAGATGATACCAGACATCCAGGGGATGGACAG  
GAAGTGCCGTTAGATTTGTATGTTCAACAAACAATACAGGATGACGCTGCAACGGTGCAA  
GCCCTAAACGAAAGTTTATGGGAAGCCAGCAACCAGTTCCTGCGCATCCTGGGTGGAT  
AATGAAC TAAGTCCACGGTTGAATGCAATATGTTTGCAGAAAAGGCACGACAAGGCCAGG  
AGAAGGTTGTTTGACCAGGACAGTGGGTATGGCAATACGCAGGTGGATATCGGAACATCC  
GAGAGTCAGGTACCAGGGGGAACCACTAACAGCGGGGGGGGAGACGTAACACAGGACGTT  
GTAGAGGAGGAACGCAGGGGGGGGGATGGGGAAACACAGCCACATGCAAAACACGCAGCAC  
ACACAGCAGACGGAAGGCACACCAGACGCATTAGACCTGCTGCAGGTTAGTAACCTAAGG  
GTAAAACTATTAGGAAAATTTAAGGAACTATTTGGGCTGTCCTTTATGGATCTGGTAAGA  
CAATTTAAAAAGTAATAAGTCAACATGTGGAGACTGGGTGGTGGGGGCATTTCGGGGTGTAC  
CATGCAGTGGCAGAAGCAGCAAAAACTGCTACAGCCTGTGTGTGAGTATGCACATATC  
CAAACATTAAC TAGTGAATGGGGAATGGTAATGCTGCTGCTACTGCGCTTTAAGTGTAAAC  
AAAAGCAGGGAAACAGTAGCGCACTGTATAGGTGGCATTTTAAATGTACCCGAAAAACGT  
ATGCTAATAGAGCCCCCAAAGCAACGCAGCGGGCCATGTGCACTATATTGGTATAGAACA  
GCAATGGGCAATGCATGTGAAGTGTTAGGGGAAACACCAGACTGGATAGTACGACAAACT  
GTAATTGGGCATGCAATGGGGGAAACGCAGTTTAGTTTATCAAACTAGTGCAGTGGGCA  
TATGACAATGACATTACAGATGAAAGTGAAC TGGCCTATGAATATGCACAATTGGGAACA  
GAGGAGCCAAATGCAGCCGCCTTCTTAGCAAGCAATTGTCAGGCACGATATATAAAGGAT  
GCAATGACATAATGTGCAGACATTATAGACGTGCAGAACAGACACGTATGAGTATGTCACAA  
TGGATAACATATAGGGGGCGCAAGGTAGCTGATACAGGCGATTGGAGGCATATAGTAAAA  
CTATTAAGATATCAAGGAATAGAATTTATTAGCTTTATGACAGCATTAAAGCAATTCCTA  
AAGGGCACACCAAAAAAGGCTGTTTTGGTATTTTTATGGACCCAGCGATACAGGCAAATCG  
CTGTTTTTGCATGAGTTTAAATAAACTATTTAGGTGGAACAGTTATATCCTTTGTAAATTCT  
ACTAGTCATTTTTTGGCTGTGCGCACTGGCAGATGCTAAAATAGGATTGCTAGACGACGCC  
ACATATCAATGCTGGATATATATGGATACATATTTAAGAAGTGTGCTAGATGGCAATGTA  
ATAAGCGTAGACAGAAAACATAAAAACTAGTACAGTTAAAATGTCTCCGTTACTAATA  
ACAACAAACATAAATCCAGAACTGATGACACATTTAAATACTTACGCAGCCGAATGGTT  
ATTTTTCCCTTTTTTAAACAAGTGCCCACTGGATGCCAATGGAGACCCAGTGTATCAATTA  
AATAATGAAAATTGGAAATCCTTTTTTTCGAAGGTCGTGGGCACGCTTAGACTTAACCCAG  
GAGGAGGAGGAGGAGGAGGTCCCAAAATGGAAACCCTAGCCGACCGTTTAGATGCGTG  
CCAGGAGAAGCTAATAGACCTTTATGAAAAAGATAGCAACAAGCTTGAGGACCAGTTAAT  
GCATTGGTACTACACGCGCTTGAACAAGCTATGCTGTTTAAAGGCAAGAGAAGCAGGACT  
AAGACACATAGGCCACCAGGTGGTGCCACACTTAGTGTGACAAAAGAAAAAGCTCGGCA  
GGCCATAATGGTGCATTTATCTTTGCAAAGCCTAAATAATAGTGCATTTAAGCACGAGCC  
ATGGACATTGCAGGACACATCATTGAACATGTGGACAGTAGCCCCAAAAGGGTGTGGAA  
GAAACATGGACAGCCCATCAGAGTAAAATATGATGGAGAAGATGATAAAGAAATGGAATA  
TGTAAACTGGGGGTTTTATATATGTACATTGTGCCAGTGAGGACACCTGGTATAAGGTACC  
TGGACAGATTAGCAACAGAGGGCTGTATTATGAACTGCAAGGCTGCAAAACATTACTATGT  
GGAATTTGCAAAGGAGGCAAAACAGTATGGGGTAAAAAACATATGGGAGGTGTATATGGG  
AGGCAAAATAATTTACCATGCATGCGACTCTGTATCCAGCACCCAGGACGCCGTGCCAGA  
AGTACCCACTGCTGAACTGCTGCACAGCTGCACCACACCACCACCGCGCCACCCCCAC  
CACCCAGCGCTGCACCAAGACTGCCCCCAGGTGCAGGCGCCGCTGCTAAGCGACAGCG  
ACTCGGAGGGGACACAGTTTACGAGCCCCGACTCTACACAAGGACACCGGCCGTTGACAG  
TTGCAGCACAAGGACAAACAATAACTGTGACAGCCCAAACGGCCACGGGAACACAGTAA  
CTGTGACAGTGCACCTGTCTACACCTAAAAGGTCAATCCAATAGCCTTAAGTGCTTTTCG  
ATATAGGTTACACAGTCGGTGCCCTGACCTGTTTGAAGGGCATCGTCCACGTGGAAGTG  
GACCTGCGGGGGGGAGGGGACAAAACATCATATGTAACACTATGGTATAAAAGTACGGA  
CCAACGCAACACAGCTCTTGGCACGTGTACATATACCAAAGGCATTGTAGCCACACTTGG  
TAGTATGTCTATGGTTATGTAAACAGTACCCATTGTATATGTATAGTGTAATGCTGTAT  
TACTGAGCCATTTGTAACAATTGTGTATGTCCTACATACCTGGCAAATAGGGCACAACCC  
TGGAACCTATTGTGTGGGCAGTGCATGTATGGTGTAAATGTGTTGCTGCTGCTAGTTCCTT  
TCTGGCTTTCCACCTATCTGCTTTTGTTCATTTGTTGTGTTTGTGTGTGTTTTATATT  
TTGGGTTGTTGCTGTTATATTTGCAGGTGCTGTGGTACATTGAATTGTTATAACACACA  
ACCAGCCAACGACTGCTGCTACATATCCCTGTACAGTCCCGGTCTACCTATTATGTATC

CCATGCAATTACGGGGTCCCCAGGGTGGGTATGACATAGTGGTGTTTGAGCGTGGTGATG  
TAGGTCTTTTTACTATTATTTTGCTTTTAATTGTTATTATTTTACTTTGGCTGTGCCACC  
GTGTTATGCAGTTTTAAAGTGCTTTTGTATTTTGTACATACTATAATAAACACTTGGTA  
CCATGCCCCAAGGTTCTTAAACGTGCGAAGCGTGCTTCTGCCACGGACCTTTATCGCACCT  
GCAAGGCCACTGGAACACGTCTGTGATGTTATTCCTAAGGTGGAAGGGGATACATGGG  
CGGATCGCTTTTTAAATGGGCCAGCCTGGGTGTGTTTTTTGGTGGTCTGGGTATTGGCA  
CATCCTCTGGCACGGGTGGCCGTACGGGCTATATACCCCTTGGTACCCGGCCTCCTACTG  
TGGTTGATGTAGGCCCTACGGCCCCGTCCGCCCGTTGTCATTGAACCCGTTGGCGCTGCAG  
ACCCTTCAATTGTTACCTTGGTGGAGGATTCCAGTGTTATTAATGCCGGGGCCCCTTTTTC  
CTAACTTTACGGGTACTGGTGGGTTTGAGGTCACCACATCCTCTATTACCACACCTGCGG  
TTTTAGACATCACCCCTCGGGGTCGTCTGTGCAGGTGAGTAGTACCAGTTATGTTAACC  
CGCTGTTTACTGAGCCTTCTATTATTGAGCCTCCCCAGGCAGGGGACATTACTGGTCATG  
TGTTGTCTAGTACAGCCACGTCCGGGTACACATACCTACGAAGAAATCCCCATGCAAACCT  
TTGCCGTGCAGGGGGGTACGGGCCTAGAACCATAAGTAGTACACCCACACCTGGGGTGC  
GGCGCCTTGCAAGGCCCTCGCTTAAATTTATACAGTCGTGCCACTCAACAGGTTCCCTGTGG  
CTGACACTGCATTCTTATCACGTCTGAATCATTGTTACCTTTGACAACCCTGTGTTTG  
ACCCCGAGGAAACAATTATATTTGAACATCCTAGTTTACATGCGCCACCCGATCCTGACT  
TTCTGGATATTGTCACTTTACATAGGCCGGCGTTAACTGCACGTAGGTGAGGTGTACGGT  
TCAGTCGCATAGGCCAAAGGCCGTCTATGCGCACACGCAGTGGTAAACATATTGGGGCCC  
GTGTTTCATTTTATCATGACCTTAGCCCTATACCACATCTTGAGGATATTGAGCTGCAGC  
CCCTGGTATCATCCTCTGTCTGTGCCTACGGATTCTATTATATGATATATATGCAGATGATG  
CCCATTGTCTCTGTATTGCGTCCCCCTTCCGTTTCTGCCCTACGTCCAGCTTCCCCCT  
TTGCCCTCTGCAGACCTTTCTGCCACCTCCATAACCGCCTCCACATATGATAATGTCACTG  
TCCCGTTGTTTTCTGGCACCGATGTGCCCGTCTATACAGGCCCTGATATTGACCATTCTG  
CTGCTCCCTCCGCACCTCCCTTTGTTCTGTATTCCCTAGCACAAACCCCATATGCTATTT  
ATATCCTGGGGTCAGATTATTATTTGCTTCCTAATTATATATTTTTTCTAAAAAGCGTA  
AACGTGTGCCCTATTCTTTTTTTCAGATGGCTTTGTGGCGGCCTGGTGACGGCAAGGTATAT  
CTGCCCCCACTCCCGTGTCTAAGGTTATCAGCACGGATCGTTATGTCTCTCGCACCAAC  
TTATTTTATTTATGGTGGTAGTTCTCGCCTGCTTACTGTGGGACATCCATATTATTCTGTT  
CCTGTGTCTACCCCTGGGCAAAACAACAAAAAGGCCACTATCCCCAAGGTTTCTGGGTAT  
CAATACAGGGTGTTTAGGGTCCATTTACCTGACCCCAATAAGTTTGGTCTTCCGGATGCA  
CAATTATATAATCCTGACACCGAGCGCCTTGTGTGGGCTTGTAGGGGTGTTGAGGTAGGC  
CGCGGGCAGCCTTTAGGCGTTGGCACTAGTGGCCACCCTTTATACAATAGGCTTGATGAC  
ACTGAAAACACCCCTTTTCTTGCTGTCTGGGGACACTGACAGTAGGGATAATGTTTCTGTG  
GATTATAAACAACACAGCTGTTAATTATAGGCTGTAAGCCGTCTATTGGGGAACATTGG  
GGTAAGGGTACTGTATGTACTAATGTGCAATATCGTGCGGGTGATTGCCCCCTTTGCAG  
TTCACTAATTCTACCATTGAGGATGGTGATATGGTTGAGGCTGGCTATGGTGCTATTGAT  
TTTGCCACACTGCAGGAAAGTAAGTCAGAGGTGCCCTTTGGATCTCTGCACCACTACCTGT  
AAATATCCTGATTATTTACAAATGGCTGCAGAGCCGTATGGCGATTGTATGTTTTTTTGT  
CTTCGGCGGGAGCAAATGTTTGCTAGGCATTTTTTTTAAACAGGCAGGGTACTATGGGTGAG  
GAGGTGCCTCAGTCTTTTTTACCTTAAGGGGACCTCCTCCCGGGCAACCCCTAGCAGTTCT  
GTGTATGCCCCACACCCAGTGGCTCTATGGTGTCCTCGGATTCCCAATTGTTTAATAAG  
CCATACTGGTTGCAAAAGGCCAGGGTCATAACAATGGTATATGCTGGTTTAATCAATTG  
TTTGTACGGTGGTAGATACCACCCGCAGCACCAATTTTACTATTAGTGCTGCTACCAAC  
ACCGAATCAGAATATAAACCTACCAATTTTAAGGAATACCTAAGACATGTGGAGGAATAT  
GATTTGCAGTTTATATTCCAGTTGTGTAAGGTCCGTCTGACTCCAGAGGTCATGTCCTAT  
TTACATACTATGAATGACTCCTTATTAGATGAGTGGAATTTTGGTGTGTGCCCCCTCCC  
TCCACAAGTTTAGATGATACCTATAGGTACTTGTCAGTCTCGCGCCATTACTTGCCAAAAG  
GGGGCCGCCCGCCGAAGCCTAAGGACGATCCTTATGCTGGCATGTCCTTTTGGGATGTA  
GATTTAAAGGACAAGTTTTTCTACTGATTTGGATCAGTATCCCTTGGGTGCGAAGTTTTTA  
TTGCAGTCTGCCCCACGTTCCACCCTGGTGTCCCGTAAACGTACAGCGTCTGCCTCTACC  
CCCCCTGCCCTCCAAACGGCGTAAGGCCAAAAAGTAATATGTGTCTGTTTGTGTTGGTGTCT  
GTGTCTGTTTGTGTTGGTGTCTGTACAATCTCTGTGTGTGCCATTTTGTATGTGTTTTGTA  
CTGTTCTGTATGTGCCCTGTTATGTATAATGTGTATGTATTTATGGAATGCGTGCCCCCTG  
TATGTTGTGTATGTTGTGTACATGTATTTGTGGAATGTGTGTGTCATGTTATGGATCAATAA

ATTGTGTGTCATTGTGGGTTTCATGTCCGGCTGCACCCTGTGAGTAAGTGTGCACCATGT  
ACACGCCTGGGTAGGTCTACTGTTTCCTTTAAGGGTATAAAGCCTCCATTTTGTATGCAA  
CCGTTTTTCGGTCTCCCGCCTTTTCGGTCTGTGGTATGGCACTGTCCCAGGTACAGCTAAT  
CCTTTGGCAGCCCAACATCCTGCGTAGGCAGCTGCAGACGTCCGCACCCAGGTGTGTCTG  
TCAGCTATTTCAATATGCTAATAAATGTATTGTCTACAGTTTATAGGTTTACTTACTCAT  
CTGCAAAAAATATGCTTTTAGGCAGTTTTTTTGGCCTACAACCTTCCCTTAAGTGCATAGT  
TGGCAGGCCGTGCACACTGTGCTGCCAGGTTTCTGTCTTGTAATAATACCACAATACTTAT  
GTAACACACCCGTTTCGGTTGCTATGTTATTCATACTATTTTCTTATACTTTACAACAAT  
GATACAGTAAAAAATAGGGAGGGACCGAATTCCGGTCCCACCGAAAGGGATACATATATA  
AAGGGCAGCAAACGGTACCCGGACAGCC

>gi|333245|gb|M62849.1|PPHT39\_Human\_papillomavirus\_ORFs

CTTATAACATTTTATAAGTATCTTGTTTAAAAAAGGGAGTAACCGAAAAACGGTCAGGAC  
CGAAATCGGTGGATATAAACGCAGTCACAGTTTCTGTCCATACCGATGGCGCGATTTCA  
CAATCCTGCAGAACGGCCATACAAATTGCCAGACCTGTGCACAACGCTGGACACCACCTT  
GCAGGACATTACAATAGCCTGTGTCTATTGCAGACGACCACTACAGCAAACCGAGGTATA  
TGAATTTGCATTTAGTGATTTATATGTAGTATATAGGGACGGGGAACCACTAGCTGCATG  
CCAATCATGTATAAAATTTTATGCTAAAATACGGGAGCTACGATATTACTCGGACTCGGT  
GTATGCAACTACATTAGAAAAATATACTAATAACAAAGTTATATAATTTATTAATAAGGTG  
CATGTGTTGTCTGAAACCGCTGTGTCCAGCAGAAAAATTAAGACACCTAAATAGCAAACG  
AAGATTTTCATAAAATAGCAGGAAGCTATACAGGACAGTGTGCGAGGTTGCTGGACCACAAA  
ACGGGAGGACCGCAGACTAACACGAAGAGAAACCCAAGTATAACATCAGATATGCGTGGA  
CCAAAGCCCACCTTGCAGGAAATTGTATTAGATTTATGTCCTTACAATGAAATACAGCCG  
GTTGACCTTGTATGTCACGAGCAATTAGGAGAGTCAAGAGGATGAAATAGATGAACCCGAC  
CATGCAGTTAATCACCAACATCAACTACTAGCCAGACGGGATGAACCACAGCGTCACACA  
ATACAGTGTTTCGTGTTGTAAGTGTAACAACACACTGCAGCTGGTAGTAGAAGCCTCACGG  
GATACTCTGCGACAACCTACAGCAGCTGTTTATGGACTCACTAGGATTTGTGTGTCCGTGG  
TGTGCAACTGCAAACAGTAACCTGCTATGGCCAATCGTGAAGGTACAGACGGGGATGGG  
TCGGGATGTAACGGATGGTTTCTAGTACAGGCAATAGTAGATAAAACAAACAGGCGACACA  
GTGTGCGAGGATGAGGATGAAAATGCAACAGATACAGGTTTACAGCCTGGCAGACTTTATT  
GATGATTCCACAGATATTTGTGTACAGGCAGAGCGTGAGACAGCACAGGTACTTTTACAT  
ATGCAAGAGGCCCAAAGGGATGCACAAGCAGTGCCTTAAAACGAAAGTATACAGAC  
AGCAGTGGCGACACTAGACCGTATGGAaaaaaAGTAGGCAGGAATACCAGGGGAACACTA  
CAGGAAATTTTCAATTAATGTAAGCAGTACGCAGGCAACACAAACGGTGTATTCCTGTCCA  
GACAGCGGATATGGCAATATGGAAGTGGAACAGCTGAAGTGGAGGAGGTAAGTGTAGCA  
ACTAATACAAAATGGGGATGCTGAAGGGGAACATGGCGGCAGTGTACGGGAGGAGTGCAGT  
AGTGTGGATAGTGCTATAGATAGTGAAAACAGGATCCCAAATCTCCAAGTGCACAAATT  
AAATTATTGTTACAATCCAATAACAAAAAGGCTGCAATGCTAACACAATTTAAAGAAACA  
TATGGACTATCCTTTACTGACCTGGTACGTACGTTTAAAAGTGATAAAACAACATGTACA  
GACTGGGTGGCAGCCATATTTGGAGTACATCCAATATTGCAGAAGGATTTAAACATTA  
ATCAACAAAATATGCCTTATATACACATATACAAAGCTTAGACACAAAAACAAGGAGTACTA  
ATTTTAATGCTAATAAGATATACATGTGGAAAAAATAGGGTTACTGTAGGAAAGGGATTA  
AGTACATTGTTACATGTTCCAGAAAGTTGTATGCTTCTGGAGCCTCCTAAACTGCGCAGC  
CCTGTAGCAGCACTATATTGGTATCGCACAGGTATATCCAATATTAGTGTGGTAACAGGG  
GATACGCCAGAATGGATACAACGATTAACCTGTTATACAACATGGAATAGATGATAGTGTA  
TTTGACCTATCGGACATGGTACAATGGGCATTTGACAATGAATATACTGATGAAAGTGAC  
ATAGCATTTAATTATGCAATGTTAGCAGATTGTAACAGTAATGCTGCAGCCTTTTTAAAA  
AGTAACTGCCAGGCAAAATATGTAAAAGATTGTGCAACAATGTGTAAACATTACAAGCGA  
GCACAAAAAAGGCAAATGTCTCATGTCTCAATGGATAAAATTTAGGTGTAGTAAATGTGAT  
GAAGGCGGGGACTGGAGACCCATAGTACAATCTTAAAGATATCAAGGAATAGAATTTATA  
TCCTTTTTTATGTGCATTAAGGAATTTTTAAAGGGTACTCCCAAAAAAACTGTATAGTT  
ATATATGGACCTGCGAATACAGGAAAGTCACATTTTTTGTATGAGCCTTATGCATTTTTTA  
CAGGGCACAGTTATTTTCATATGTAAACTCCACCAGCCACTTTTGGCTAGAACCACCTTGCA  
GATGCAAAACTAGCAATGTTAGATGATGCAACCGGTACCTGCTGGTCATATTTTCGATAAT  
TATATGAGAAATGCATTAGATGGGTATGCAATAAGTTTAGATAGGAAATATAAAAGTTTA  
CTACAAATGAAATGTCCACCATTATTAATAACCTCCAATACCAATCCTGTGGAAGACGAT

AGGTGGCCATATTTACGTAGTAGGCTAACAGTGTTTAAATTTCTAATGCATTTCCATTT  
GACCAAAACAGGAATCCAGTGTACACAATCAATGATAAAAACTGGAAATGTTTTTTTGAA  
AAGACTTGGTGCAGATTAGACTTGCAGCAGGACGAGGATGAAGGAGACAATGATGAAAAC  
ACTTTCACAACGTTTAAATGTGTTACAGGACAAAATACTAGAATACTATGAACAAGACAG  
TAAATCAATATATGATCAAATTAATTATTGGAAATGTGTGCGAATGGAAAAATGCAATATT  
TTATGCAGCACGAGAACGTGGCATGCATACTATTGACCACCAGGTGGTGCCAACCATAAA  
CATTTTCAAAATGTAAAGCATATCAAGCTATTGAACTGCAGATGGCACTAGAAAGTGTTCG  
ACAAACTGAATACAATACAGAGGAGTGGACATTTAAAAGACACTAGTAATGAACTGTGGCA  
TACACAGCCAAAACAATGTTTTTAAAAAACAAGGAACTACAGTGGAGGTGTGGTATGATGG  
GGACAAATGTAATGCTATGAACTATGTATTATGGGGTGCTATATATTATAAAAAATAATAT  
AGACATATGGTGTAAAACAGAAGGGTGTGTGGACTATTGGGGTATATATTATATGAACGA  
GCACCTAAAAGTATACTATGAAGTGTATTATCAAGATGCGGAAAGGTATGGGACTAGTGG  
CAAATGGGAAGTGCATTATAATGGCAACATAATTCAATTGTCCTGACTCTATGTGCAGTAC  
CAGTGACGGATCGGTACCCACTACTGAACTTACTACCGAATTATCAAACACCACCGCGAC  
CCATTCCACCGCAACAACCCCATGCACCCAAAAACAATCCCGCCGCCGTCTCGAAAGCG  
ACCTCGACAGTGTGCAGTCACAGAGCCCACTGAGCCCGACGGAGTGTCCCTGGACCATCT  
TAACAACCCACTCCACAGTAACAGTACAGGCCACAACAAGACGGTACCTCAGTTGTGG  
TAACACTACGCCTATAATACATTTAAAAGGTGACAAAAATGGTTTAAATGTTTAAAGATA  
TAGACTACAAAAATATGACACATTGTTTGAAAAATATTTTCATGTACTGGCATTGGATACG  
GGGTAAAGGGAACCAAAAACGCTGGCATATTAACCTGTTACATATGCCACAGAGTCACAACG  
CCAAAAATTTTGGACACTGTTAAAATACCTTCTAGTGTACATGTTTCATTGGGTACAT  
GACATTGTAAAGTATACTATGGATATTGTGTATGTATATTGTATACATACTACATAGATG  
ATATTATTGGTATTTTTTGGTGTGGTTTGGTGTGTGTATATATATATGTTGCAATGTCCCG  
CTTTTGCCGTCTGTGCATGTGTGTGCGTATGTGTGGATAATTGTGTTTGTGTTTATTCTT  
ATACGTACCACACCATTGGAGGTGTTTTTTGTATATTTACTATTTTTTGTATTGCCCATG  
TGGTTGTTGCATAGACTGGCAATGGATATGATATAGTACTGTATATGTATGTGCATTGTG  
CATAACTACTGTACATAGCTTTTTTATATTTTTTTTTTGTACTAATAAACATGGTTTCCCA  
CCGTGCTGCCAGGCGTAAGCGTGCATCTGCAACTGACCTATATAGAACCTGTAAACAATC  
GGGTACCTGTCCACCAGACGTTGTTGATAAAGTTGAGGGTACTACACTTGCTGACAAAAT  
TTTACAGTGGACTAGTTTAGGTATATTTTTGGGTGGGTAGGCATAGGCACAGGTACTGG  
TACTGGGGGACGCACAGGATATATACCCCTGGGGGTAGGCCTAATACTGTTGTAGATGT  
GTCTCCTGCACGTCCACCTGTAGTTATTGAACCTGTTGGTCTTCTGAGCCATCTATTGT  
GCAATTGGTGGAGGACTCAAGTGTTATAACCTCTGGAACACCAGTACCAACATTTACAGG  
CACCTCTGGATTTGAAATTACTTCTTCTTCTACTACTACGCCTGCGGTATTGGATATTAC  
ACCCTCCTCTGGGTCTGTACAAATAACCTCTACTAGTTATACTAACCCCTGCCTTTACGGA  
TCCTTCCTTAATTGAGGTTCCCCAAACAGGTGAAACCTCGGGTAATATATTTGTGAGTAC  
CCCTACATCAGGTACACATGGCTATGAGGAAATACCTATGGAAGTGTGTCACACATGG  
CACAGGTACCGAACCTATTAGCAGCACACCTACACCTGGAATCAGTCGTGTGGCAGGACC  
ACGTTTATATAGTAGAGCACATCAGCAGGTTTCGTGTTAGTAATTTTGATTTTGTAACCTCA  
CCCTTCATCATTTGTAACATTTGATAATCCTGCTTTTGAGCCTGTTGATACTACATTAAC  
ATATGAAGCTGCTGACATAGCTCCAGATCCGGATTTTCTGGACATTGTTTCGTTTACATAG  
GCCTGCCTTAACCTCGCGTAAAGGAACAGTAAGGTTTAGTAGGCTTGGCAAAAAGGCTAC  
CATGGTTACCCGGCGTGGCACACAAATTGGAGCGCAAGTACATTATTACCATGACATTAG  
TAGTATTGCTCCTGCTGAAAGCATTGAATTACAGCCCCCTAGTTCACGCTGAGCCCTCTGA  
TGCTTCAGATGCATTATTTGATATATATGCTGATGTGGACAATAACACATATTTAGATAC  
TGCATTTAATAATAAAGGGATTCTGGGCACTACATATAACACAGGCTCACTACCTTCTGT  
GGCTTCTTCAGCATCTACTAAATATGCCAATACAACATTTCTTTTAGTACCTCATGGAA  
TATGCCTGTAAATACTGGTCTGATATTGCTTTACCAAGTACTACTCCACAGTTGCCATT  
GGTGCCCTTCTGGACCAATAGACACAACATATGCAATAACCATTACAGGTTCCAATTATTA  
TTTGTGTGCCATTATTGTATTTTTTCTTAAAAAACGTAACGTAATTCCTATTTTTTTTTTC  
AGATGGCTATGTGGCGGTCTAGTGACAGCATGGTGTATTTGCCTCCACCTTCTGTGGCGA  
AGGTTGTCAATACTGATGATTATGTTACACGCACAGGCATATATTATTATGCTGGCAGCT  
CTAGATTATTAACAGTAGGACATCCATATTTTTAAAGTGGGTATGAATGGTGGTCGCAAGC  
AGGACATTCCAAAGGTGTCTGCATATCAATATAGGGTATTTTCGCGTGACATTGCCCCGATC  
CTAATAAAATTCAGTATTCCAGATGCATCCTTATATAATCCAGAAACACAACGTTTAGTAT

GGGCTTGTGTAGGGGTGGAGGTGGGCAGGGGCCAGCCATTGGGTGTTGGTATTAGTGGAC  
ACCCATTATATAATAGACAGGATGATACTGAAAACCTACCATTTTCATCAACCACCAATA  
AGGACAGTAGGGATAATGTGTCTGTGGATTATAAACAGACACAGTTGTGCATTATAGGCT  
GTGTTCCCGCCATTGGGGAGCACTGGGGTAAGGGAAAGGCATGCAAGCCCAATAATGTAT  
CTACGGGGGACTGTCCTCCTTTGGAAGTAGTAAACACCCCTATTGAGGATGGTGATATGA  
TTGATACTGGCTATGGAGCTATGGACTTTGGTGCATTGCAGGAAACCAAAAGTGAGGTGC  
CTTTAGATATTTGTCAATCCATTTGTAAATATCCTGATTATTTGCAAATGTCTGCAGATG  
TGTATGGGGACAGTATGTTCTTCTGTTTACGTAGGGAACAACCTGTTTGCAAGACATTTTT  
GGAATCGTGGTGGTATGGTGGGTGACGCCATTCTGCCCCCTCTCCAGCGGTTCATGGTAA  
ATATACGTGCAAACCCCGGTAGTTCTGTATACTGCCCCCTCTCCAGCGGTTCATGGTAA  
CCTCTGATTCCAGTTATTTAATAAGCCTTATTGGCTACATAAGGCCAGGGCCACAACA  
ATGGTATATGTTGGCATAATCAATTATTTCTTACTGTTGTGGACACTACCCGTAGTACCA  
ACTTTACATTATCTACCTCTATAGAGTCTTCCATACCTTCTACATATGATCCTTCTAAGT  
TTAAGGAATATAACCAGGCACGTGGAGGAGTATGATTTACAATTTATATTTCAACTGTGTA  
CTGTCACATTAACAACTGATGTTATGTCTTATATTCACACTATGAATTCCTCTATATTGG  
ACAATTGGAATTTTGCTGTAGCTCCTCCACCATCTGCCAGTTTGGTAGACACTTACAGAT  
ACCTACAGTCTGCAGCCATTACATGTCAAAGGATGCTCCAGCACCTGAAAAGAAAGATC  
CATATGACGGTCTAAAGTTTTGGAATGTTGACTTAAGGGAAAAGTTTAGTTTGGAACTTG  
ATCAATTCCTTTGGGACGTAAATTTTTGTTGTCAGGCCAGGGTCCGCAGGCGCCCTACTA  
TAGGTCCCCGAAAGCGGCCTGCTGCATCCACTTCCTCGTCTCAGCTACTAAACACAAAC  
GTAACCGTGTGTCTAAATAATGCATGTGTATGCCTTGTTATGTGTGTGTATGTTGTTTGT  
TTCCTTATGTGTTGAGTGTATATGTGTATGTTTGTAGGTATGTGTGTATATGTTTTTGT  
AATAAAGTATGTATGACAGTTTCATGTGTGATTGCACACCCTGTGACTAACAGTGTATTT  
GTTTTACATATAATAGGTCTGCAACATTTTCATACATAATCTATATGCCCTACCCTAAGGT  
GTGTTTACTACCTAATATGTAATTTTTTACATTGTTGTATGCGTTTCTACATTTTATACTT  
CGCCATTTTGTGGCGACCGAAGTCGGTCTGTTGGTGGAGCATTTTTTTTTAAACTAGTGGAA  
ACCACCTTTCTCAGCAAAAACATGTCTTTACCTTAGGTTTACCCTGCATAGTTGGCACTG  
GTAACAGTTTACTGGCGCGCCTTATTACTCATCATCCTGTCCAGGTGCACTGCAACAAT  
ACTTTGGCAACATCCATATCTCCACCCTATGTAATAAACTGCTTTTAGGCATATATTTT  
AGCTGTTTTTACTTGCTTAATTAATAAGTTGGCCTGTATAACTACTTTTTGATTTCAGGAA  
TGTGTCTTACAGTATAAGTTATACAAGTGACTAATGTAGCACACAATAGTTTATGCAACC  
GAAATAGGTTGGGCATACATACCTATACTTTTA

>gi|6970427|dbj|AB027021.1|\_HumanPapillomavirus\_type\_82\_DNA,\_complete\_genome

ATACTTTACAATTATCTTGTAAGGAGTAGGGTGTAAACCGAAAAGGGTTATGACCGAAAAC  
GGTGCATATAAAAGCAAGCACGAAAAATACATAAGAACACCATGTTTGAAGACATAAGAG  
AAAGACCACGAACGCTGCACGAATTATGTGAAGCCTGCAATACGTCTATGCACAATATTC  
AGGTATTGTGTGTATATTGTAAGGAGGAGTTGTGTAGAGCAGATGTGTATAATGTAGCAT  
TTACAGAACTTAGGATTGTATATAGGGACAATACGCCATATGCAGCATGCAAAAAATGCC  
TAATGTTTTATTCTAGAATTAGAGAATACAGAAGGTATAGTAGGTCTGTGTATGGTGCTA  
CATTAGAGGCCATTACTAACAAAAGTTTATATGAATTATTAATAAGGTGTCATAGATGTC  
AGAGACCACTTGGGCCTGAAGAAAAGCAAAAGGTGGTGGACGACAAAAAAGGTTTCATG  
AAATAGCGGGACGCTGGACGGGACAGTGTGCAAATTGCAGAAAACCAAGACAACGTA  
GTGAAACCCAGGTGTAATAACGCCATGCGTGGTAATGTACCACAATTAAAGGACATAGTG  
TTGGAGTTAACACCACAACCTGAAATTGACTTGCAATGCTACGAGCAATTTGACAGCTCA  
GACGAGGAGGATGAAGTAGATAATATGCGTGACCAGCCAGCCAGACAAGCTGGACAGGAT  
ACGTGTTACAGAATTAAAGTGCCTGTTGCAGGTGTTGAGTGTGTACAGCTCGCAGTG  
GAAAGCAGTGGAGACAGCCTTCGCATATTTAGCAAATGTTACTGGGCGACCTAAGCCTG  
GTGGTCCCGTGGTGTGCGGCAACTAACATCGGCAATGGACAGTGAAGGTACAGAGGATG  
AGGCGGCGGGGTGTACCGGGTGGTTTTATGTGGAGGCAGTAGTTGACAAAAAACGGGAG  
ATAATGATATCAGACGATGAGGAGGAAGATACAAATGATACAGGGTCTGATATAATAGATT  
TTATAGATACAAGTAATAGTATTTGTAGTCAGGCGGAACGGGAGACAGCACAGGCGTTGT  
TGCAGGTCCAAGAAACACAGGCACACAAAAGAGGCTGTGCAGCATCTAAAACGAAAGTTTC  
TAGGCAGTCCGCGGAGCAGCCCATTAAGACATTACAAATCAAAACACACAAAGCAATA  
GTCAGCAACAACCAAAACAGGCAAACTTCAACACGGTAAAAGGAGATTACTGGACAGTT  
ATCCGGACAGTGGATATGGCAATACACAAGTGGAGACTGTGGAAGGACCCTTACAGGTAG

ATGGGCAAAATGACGGGTCACAACATAGTATGTGTAGTGGCGGGGGGAGCAGCGACAGAA  
GTACAGAGATAGACCTGGAAACAAACGAAAATGCTACCAATGTAGGACTAAACAGTATAT  
GTGCAGTGTTAAAATGTAGCAATGCAAAAGCAATGTTTATGGCAAAATTTAAAGAACTGT  
ATGGTGTTAGTTATAATGAGTTGGTAAGGGTATTTAAAAGTGATAAAACATGCTGCACGG  
ACTGGGTATGTGCCTTATTTGGGGTATCGCCAATGGTGGCAGAAAATTTAAAAACCCTAA  
TTCAGCCATTTTGTATGTACTACCATATACAATGCCTATCATGTGATTGGGGTACTATTG  
TGCTACTGTTAGCTAGATTTACATGTGCCAAAAACAGACTTACCATTGCCAAATGTTTAG  
GTACATTAGTAAATATTCCACAATCACAAATGTTTATAGAACCACCTAAGCTACGTAGTA  
CAGCCGTTGCATTGTACTTTTATAGAACAGGAATATCAAACATTAGTAGCACATATGGCG  
AAACACCAGAATGGATTACAAGACAAACACAACCTACAGCACAGTTTTGATGATAGCACGT  
TTGAACTATCGCAAATGGTACAATGGGCATTTGACCATGATGTAGTAGACGATAGTGAAA  
TAGCATTTTACTATGCACAATTGGCTGATACAGATAGCAATGCAGCAGCGTTTCTAAAAA  
GTAATTGCCAAGCAAAGTATGTAAAAGACTGTGGGACTATGACACGGCACTACAAACGAG  
CACAAAGAAAAATCACTAACAATGTCAGCATGGATTAGGTATAGATGTGACAAAGTGCAAG  
ACGGGGGTAACTGGAGGGAAATAGCTAAATTTTTGCGATACCAGGGTATTAACTTTATGT  
ATTTTATACAAACATTTAAATTGTTTTTAAAAGGAACACCAAAACACAACCTGCATAGTAA  
TACAGGGCCCAACAAACACAGGGAAATCACAAATTTGCAATGAGTTAATTAGATTTTTGC  
AAGGGTGCGTTATTTTCATATGTAAATTCAGGTAGTCATTTTTTGGTTACAGCCACTAGAGG  
ATGCCAAGGTAGCATTTATAGATGATGCCACATATGGCTGTTGGACATATATAGACCAGT  
ACCTAAGAAATTTCTTAAATGGTAATCCATCTAGTATTGATAGGAAACACAGAAGCCTGC  
TGCAAATGTATGCCCACCATTGCTTATTACCTCAAATATCAATCCAAAAGAAGATCCAA  
ATTTAATGTATTTACATAGTAGAGTGACAGTATTTCAATTTTTTAAATGCATTTCCATTTG  
ACCCCCATGGGAATCCTGTATATGCACTAAATGATGTAAACTGGAAAAATTTTTTTTCCA  
CCACCTGGTCCAGATTAGATTTGGAGGAGGAAGAGGACAAAGAAAATGGAGACCCTATGT  
CATCGTTTAAATGTGTGCCAGGAGAAAAATACTAGACTGTTATGAACTGGACAGTGATAAA  
TTAGTAGATCAAATTAATTATTGGACGTTGGTACGATATGAATGTGCTATGTTTTATACT  
GCACGAGAAAAGAAACATGCAACCCCTTAACCATCAAGTAGTACCAGCATCGGCAGTATCA  
AAACAAAAGGCCTGCCAAGCCATTGAAATGCATATGGCATTAGAATCGCTAAACAAATCT  
GAATATAATATGGAACCATGGACAATGCGGGACACATGCTATGAACTATGGGGCGAGGCC  
CCTAAACATTGTTTTCAAAAAGGGGGAAAAACTGTAACAGTGATGTTTGATGGGAATAAG  
GACAATACAATGGACTATACATGTTGGACATATGTGTATATATATAAAGAGGATAGATGG  
GTAAAAACACAGGGAAACGTGGACTATACAGGTATTTATTACAAACCAGATGTAAACAAA  
GAATATTATGTAACATTTAAAGATGAAGCAAAAAAATATGGGGCACAACAATGGGAGGTA  
TATATGTGTGGCAATGTAATAACATGTCCTGAATATGTATCTAGTACCTACAGCACCCCG  
TCACCCCTCTACTACAACCTGTTGAACAGCTATCGAACACCCCCACGACCAATACCTATTCC  
GCCTCCGCGGGCACCACAGAAGCCCAGACACCACAACAACGAAAACGACAGCGACTTGCT  
GAGCCCGACTCCTCCACAGTCACCCCGCTGTCCGTGGACACCTGCGACCACCAAATACAC  
TGTGGAACCTGCAGGCCCAAACACCCGGAGGGCACCTCAGTGCAACTAAAACTGCGTTTATA  
GTTTCATTTAAAAGGTGCAACAAATTGTTTAAAATGTTTAAAGATACAGATTTGCAAAACAT  
AGAAATTTGTTTAAAGAAGTGTCTATCTACCTGGCATTTGGACCAGTAATACAAAAGCAGGC  
ATTGTTACAATTACATTTGACAGTGCACACCAACGTCAAAGTTTATTGATACTGTTAAA  
GTACCATCAAGTGTGACAGTGTCAATTGGGTATTATGACAGTGTAATATATGTATTGTAC  
ATATATAGGTTTACAAGCCAATATGTGCTGCTAAGTGTATATAGTTACTCGCAACCATTG  
CGGTGTTTTTGGTGTGTTTATTTGTGCTTTGCGTGTGTGTGTGCTTGTGTTGTGTTGTT  
TTTGGTTTGTGGTTGCCACATCACCTTTAACTACATTTACTGTATACTTGATTTGTTTTT  
ATATTCCATGCTTTTTTATTACATTTATATACCTTTTTCTATTTTGCAACTTACACAATAAA  
ACTTTGTATGTTTTTGTATTATATACAATGGTGGCTGCACGTGCACGGCGGCGTAAGCGA  
GCATCTGTAAACACAATTATATCCACATGCAAAGCTGCTGGTACATGTCTCCTCCTGATGTT  
ATTCTTAAGGTAAAGGGTACTATTAGCTGATAAAATATTACAATGGAGTGGTTTGGGT  
ATATTTTTTGGGGGTTTGGGTATTGGCACC GGCTGGCACTGGGGGCAGAACTGGGTAC  
ATTCTTTTAGTGGTGGTGGACGGCCTGGTGTTGTAGATATTGCTCCGGCCAGGCCTCCA  
ATTATTATTGAACCTGTAGCCCCTACTGAACCTTCTATTGTTAACCTTGTTGAGGATTCT  
AGTATTATTAAATTCAGGCTCTACTATACCTACCTTTACTGGTACTGATGGCTTTGAAATT  
ACTTCCTCTTCTACAACAACCTCCTGCGGTTTTAGACATTACACCTTCCGCTGGTACAGTA

CATGTTTACAAGCACTAACATTGAAAATCCCTTATATATTGAAACCTCCATTTATTGAGGCC  
CCACAATCAGGTGAGGTATCTGGACATATATTTACCAGTACCCCTACGTCTGGCACCCAT  
GGATATGAGGAAATACCTATGGAGGTATTTGCCTCCAATGTTACTACTGGTAAGGAACCC  
ATTAGCAGTACACCCACCCCTGGGGTGCGCCGCATTGCTGCACCTCGTTTATATAGCAGG  
GCATTTTTCACAGGTTAAGGTTACTAATCCAGACTTTATTAGTAAGCCCTCTACATTTGTT  
ACTTTTGGATAATCCTGCTTTTGAACCTGCTGATACATCATTGTCCTTTGGAGGAACCTACT  
GATGTTGCACCAGATCCTGATTTTTTTAGATATTATTAAACTGCACCGCCCTGCGCTGACA  
TCTCGCAGAGGTACAGTGCGGTTTTAGTAGATTGGGTCAAAAGGCCACCATACGCACACGT  
AGTGGCAAACAAATAGGTGCTCGTGGACATTATTATCATGATATAAGTAGTATTGCACCT  
GCTGAGGAACTTGAATGCAGCCTTTACTTTCCCTTCTACTAATAATTATAGTTATGA  
ATTTATGCTGATTTAAATGAAGCTGAAACAGGTTTTATGCAGCCTACACAAACCACACCT  
ATGCTTTCGCTTCTCCATTTTCTCCTTTGTCTACACAACCTACCTTATTGTCTTCCCTCTGTT  
TCTTCTCCTTCTGCTAATGTTACTACTCCCTTTTCTTACCACATATAATGTTTCCCTATT  
ACGGGTCTGTATGTTGTGTTTACCTACTTCAACCCACTGTGTGGCCCTTTATTCCACACACA  
TCTATTGACACACAACATGCTATTGTTTATACAAGGTGGGGATTACTACTTTGTGGCCGTA  
TACATATTTGTTTACGCAAACGCCGTAAACGTATACCCCTATTTTTTTTTGCGAGATGGCTTTGT  
GGCGTACTAATGACAGCAAAGTGATTTTACCACCTGCACCAGTGTCACGCATTGTCAACA  
CAGAAGAATATATAAACCCGCACCGGCATATATTATTATGCAGGCAGTTCCAGACTTATTA  
CCTTAGGACATCCATATTTTTCAATACCCAAAACCAATACACGTGCTGAAATACCTAAGG  
TATCTGCCTTTTCAGTATAGGGTGTTTAGGGTACAGTTACCTGACCCCAACAAATTTGGTC  
TTCCTGATCCTAATTTGTTTAAATCCAGACACAGATCGTTTGGTGTGGGGATGTGTTGGTG  
TTGAAGTAGGTAGGGGTCAGCCGTTAGGTGTTGGCCTTAGTGGTCATCCTTTATTTAATA  
AGTATGATGATACTGAAAACCTCTAGGTTTGCCAAATGGCAACGACCAACAGGATGTTAGGG  
ACAACATATCTGTGGACAACAACAACTCAGTTATGCATTATAGGCTGCGCTCCTCCTA  
TTGGGGAAACACTGGGGCCACAGGTACCACATGTAAAAACGTACCTGTACCTCAGGGTGACT  
GTCCACCTTTTGAACCTTGTGTCTACTGTCTATTGAGGATGGCGATATGGTGGACACTGGTT  
TTGGGGCCCATGGATTTTGTCTAATTTACAAGCTACTAAATCAGATGTTCCATTGGATATTG  
CTCAGTCTGTGTGTAAATACCCGTATTACTTAAAAATGTCAGCAGATACATATGGCAATT  
CTATGTTTTTTTCATTTACGCAGGGAGCAAATATTTGCTAGGCATTACTATAATAAGGCTG  
GTGTGGTTGGTGATGCCATTCAGACAAGGCTTATATTAAGGGTACTGGTGTCTGGCCGCG  
ACCTATTAGTAGTTATATTTATTCAGCTACTCCAGTGTTCTATGATAACCTCTGATT  
CTCAGATTTTTTAATAAGCCTTATTGGTTGCTATGCTGCGCCAGGGCCACAATAATGGCAATT  
GCTGGAATAATACGCTTTTATTACTTGTGTGTGTGACACTACTAAAAGTACCAATTAACCA  
TTAGCACTGCTGTTTACTCTTCTGTTGTCACAAACATTTACTCCAGCAAACCTTTAAGCAGT  
ACATTAGGCATGGGGAAGAATATGAATTGCAATTTATATTTCAATTGTGTAAAAATCACTT  
TAACTACTGAAATTATGGCTTACCTGCACACCATGGATTCTACAATTTTGAACAGTGGA  
ATTTTGGATTAAACATTGCCCCCCCTCCGCTAGTTTGGAGGATGCCTATCGATTTGTAAAAA  
ATGCAGCAACATCCTGTCACAAGGACAGTCCTCCACAGGCTAAAGAAGACCCCTTTGGCAA  
AATATAAATTTTGAATGTAGACCTTAAGGAACGCTTTTCTTTGGATTTGGATCAGTTTG  
CATTGGGTGCGAAGTTTTTTATTACAAATCGGTGCCCAACGCAAACCCAGACCAGGCCCTTA  
AAAGGCCTGCCCATCCTCTTCCGCTTCTCGTCTGCCAAACGTAAAAGGGTTAAAAAAT  
AGGTTTCGCCCTGCCTATGTATGTGTTTTGTGTGTGTGTGTGTGTGTGTGTGTGTGTGTGT  
GTGTGTATTTGTGTGTGTATGTTTTATGTATATTTTTCTGTATGTTTTGCTGTATGTTTTT  
TGTGTGGTTTTACTAATAAAGTATGTATGTGTGTGTGTGTGTGTGTGTGTGTGTGTGTGTGT  
CATGACTGCATATGTATGACATAAAAAAGTGTTTTGTAATAATTACATTATCCCTGTAGGT  
TAAGGGTGGTGTTTTAGGTGGCGTCCCTATTGCCCTACCCATATTTGTGGCTTGCAGCACA  
CTTGTATATATATGTTCTTGCTGTATTGCATGTACCACAGGATTCCATTTTGTTTTTTCC  
TGCAGCCATTTTGTGGCGACCGATTTTCGGTTGCTTAAAAATGACTACATTTGCCAACTTT  
TGAACCACACTACCTATGTTTTTTTGGCATAACCCCTTAATTCTTTTGGCATGGTATGTACA  
TCCC GCCCGCCACGCTTGTTCCTGGCGCGCCTTCTTGGCGCATGTCTATACACACCACA  
TTACTCATTTGTACTTAAACAATTGTTGGCACAATATTTTTCCGCCCTGTAATAATTTAT  
ATGCTTATAGGCATGATTTTTTTGGCTTATTTTGCCTTTATTAATTGCATACTTGGCAGG  
TCATGAATAAAATGTCTCTGCCAAGTTTCTATCCTACCTATAAAAATGATTACTCATCTG  
CAGGTGTGCTACACAACCTGTGTTACCCAACCGATTTGTGTTTTTGCCTATGCTTGCAACAT  
TTTTTCTTATA



>gi|333087|gb|M62877.1|PPHDNA\_Human\_papilloma\_virus\_type\_51\_genomic\_DNA,\_partial  
\_sequence

AACAATTATCTTGTAAAAACTAGGGTGTAAACGAAAAGGGTTATGACCGAAAACGGTGCA  
TATAAAAGTGCAAGTGGTAAAAGTATAGAAGAACACCATGTTCTGAAGACAAGAGGGAAAGA  
CCACGAACGCTGCATGAATTATGTGAAGCTTTGAACGTTTCTATGCACAATATACAGGTA  
GTGTGTGTGTATTGTAAAAAGGAATTATGTAGAGCAGATGTATATAATGTAGCATTTACT  
GAAATTAAGATTGTATATAGGGATAATAATCCATATGCAGTATGCAAACAATGTTTACTG  
TTTTATTCAAAAATTAGAGAGTATAGACGTTATAGCAGGTCTGTGTATGGTACTACATTA  
GAGGCAATTACTAAAAAAGCTTATATGATTTATCGATAAGGTGTCATAGATGTCAAAGA  
CCACTTGGGCGCTGAAGAAAAGCAAAAATTGGTGGACGAAAAAAAAAAGGTTCCATGAAATA  
GCGGGACGTTGGACGGGGCAATGCGCTAATTGCTGGCAACGTACACGACAACGTAACGAA  
ACCCAAGTGAATAAAGCCATGCGTGGTAATGTACCACAATTAAAAGATGTAGTATTGCA  
TTTAACACCACAGACTGAAATTGACTTGCAATGCTACGAGCAATTTGACAGCTCAGAGGA  
GGAGGATGAAGTAGATAATATGCGTGACCAGCTACCAGAAAGACGGGCTGGACAGGCTAC  
GTGTTACAGAATTGAAGCTCCGTGTTGCAGGTGTTCAAGTGTAGTACAACCTGGCAGTGGA  
AAGCAGTGGAGACACCCTTCGCGTTGTACAGCAGATGTTAATGGGCGAACTAAGCCTGGT  
TTGCCCCGTGTGTGCGAACAACCTAGCAACGGCGATGGACTGTGAAGGTACAGAGGATGAG  
GGGGCGGGGTGTAATGGGTGGTTTTTTTGTGTAAGCAATAGTAGAAAAAAAAAACAGGAGAT  
AATGTTTTCGGATGATGAGGATGAAAAATGCAGATGATACAGGATCTGATTTAATAAACTTT  
ATAGTTAGTGAACCTAGTATTTGCAGTCAGGCGGAACAGGAGACAGCACGGGCGTTGTTT  
CAGGCCCCAAGAATTACAGGCAAAACAAAGAGGCTGTGCATCAGTTAAAACGAAAGTTTCTA  
GTCAGCCCCGGAAGCAGGCCATTAGGAGACATTACAAATCAAAACAACACACAGCCAT  
AGTCAGGCAAAACGAGTCACAAGTTAAAAAGGAGATTACTGGACAGTTATCCGGACAGCGGA  
TATGGCAATACACAAGTGGAACCTGTGGAAGCAACGTTGCAGGTAGATGGGCAACATGGC  
GGTTCACAGAACAGTGTGTGTAGTAGCGGGGGGGCAGTGTTATGGATGTGGAAACAACA  
GAAAGCTGTGCAATGTAGAATAAACAGTATATGTGAAGTATTAAGGAGCAGTAATGCA  
AAAGCAACGTTAATGGCAAAATTTAAAGAGTTGTATGGTATTAGTTATAATGAGTTGGTA  
CGGGTGTTTAAAGTGATAAACATGTTGTATAGATTGGGTTTGTGCATGTTTGGCGTT  
TCCCCAATGGTAGCAGAAAATTTAAAAACACTAATTAAGCCATTTTGCATGTACTACCAT  
ATACAATGTTTATCATGTGATTGGGGCACCATTGTATTAATGCTAATTAGGTTTTTCATGT  
GCAAAAAACAGAACAACAATTGCTAAGTGTTTAAAGTACATTAGTAAATATCCCACAATCA  
CAAATGTTTATAGAACCACCAAAATTACGTAGTACACCTGTGGCATTATATTTTTATAGA  
ACAGGCATATCAAACATTAGCAATACATATGGAGAGACACCTGAATGGATTACACGACAA  
ACGCAACTACAACATAGTTTTGAGGATAGTACCTTTGAATTATCACAATGGTGCAATGG  
GCATTTGACCATGAAGTATTAGATGATAGTGAATAGCATTTTCATTATGCACAATTAGCA  
GATATAGATAGTAATGCTGCAGCGTTTTTAAAGAGTAATTGCCAAGCAAAATATGTAAAA  
GATTGTGGGACCATGGCACGGCATTACAAACGAGCACAAAGAAAATCATTATCTATGTCA  
GCCTGGATAAGGTATAGATGTGATAGAGCAAAGGATGGAGGCAACTGGAGAGAAATTGCT  
AAATTTTTTAAGATATCAAGGTGTAAACTTTTATGTCCTTTATTCAAATGTTTAAACAGTTT  
TTAAAAGGAACACCAAAACACAATTGCATAGTCATATATGGCCCAACAAACACAGGCAAG  
TCATTATTTGCAATGAGCCTAATGAAGTTTATGCAAGGTCCATTATTTTCATATGTAAAC  
TCTGGTAGTCATTTTTGGTTACAGCCACTAGAGGATGCTAAAATAGCATTTGTTAGATGAT  
GCTACGTATGGGTGTTGGACATATATTGATCAGTATTTAAGAACTTTTTAGATGGTAAT  
CCATGTAGTATAGATAGAAAACATAGGAGTTTAAATACAATTAGTATGTCCACCATTACTA  
ATAACGTCAAACATAAATCCACAAGAGGATGCAAACCTAATGTATTTACATACAAGGGTA  
ACAGTATTAAAGTTTTTAAATACATTTCCATTTGATAACAATGGGAATGCTGTGTATACA  
TTGAATGATGAAAATTGGAAAAATTTTTTTTCCACCACATGGTCCAGATTAGATTTGGAG  
GAGGAAGAGGACAAAGAAAATGGAGACCCCTATGCCACCGTTTAAATGTGTGCCAGGAGAA  
AATACTAGACTGTTATGAACCTGGACAGTGATAAATTAGTAGATCAAATTAACCTATTGGAC  
ATTGTTACGATGATGAAGCTGCTATGTTTTATGCAGCACGGGAAAGAACTTACGAACAAT  
CAATCACCAGTAGTACCAGCAACAACAGTATCAAAACAAAAGGCCTGTCAAGCAATTGA  
AATGCACATGGCCTTACAATCGCTTAAACAAATCAGACTATAACATGGAACCATGGACAAT  
GCGGGAGACATGTTATGAACCTATGGTGTGTGGCTCCCAAGCAATGTTTCAAAAAGGGGGG  
CATAACTGTAACAGTTATATTTGATGGAAAATAAGGACAATGCAATGGACTATACAAGCTG  
GAAATTTATATATATATATGATAATGATAAGTGGGTAAAGACAAATGGAAATGTGGACTA

TACGGGTATATATTACACTGTAAATTCAAAAAAGAATATTATGTACAGTTTAAAGATGA  
AGCCAAAATATATGGGGCACAACAGTGGGAGGTCTATATGTATGGTACTGTAATAACATG  
TCCTGAATATGTATCTAGTACCTGCAGCGACGCGTTATCCACTACTACAACGTTTGAACA  
ACTATCAAAACCCCCAACGACCAATCCCCCTTACCACCTGCGTGGGCGCCAAAGAAGCCCA  
GACACAACAGCGAAAACGACAGCGACTTACTGAGCCCGACTCCTCCACAATCTCCCCACT  
GTCCGTGGACAATACAAACAACCAAATACACTGTGGAAGTGGAAGCACTAACACTGGAGG  
GCACCAAAGTGCAACTCAGACTGCGTTTATAGTGCATTTAAAAGGTGATACAAATTGTTT  
AAAATGTTTTAGATACAGATTTACAAAACACAAAGGGTTATATAAAAAACGTATCCTCAAC  
CTGGCATTGGACCAGTAATACTAAAAACAGGCATTGTTACCATTGTGTTTTGACAGTGCACA  
TCAACGGGAAAACATTTATAAAAAACCATTAAGTACCCCCAAGTGTAACACTGTCATTGGG  
AATTATGACACTGTAAGTGTATATATGTATTGTACATATATACTGTCACAAGCCAA  
TATGTGCTGCTAATTGTATAGACATATTGTAACCATTCAGTGTATTATTATTTTGCTATT  
TGTGCTTTGCTTGTGTGTGTGTCTTGTGTTGTGTTGTTTGTGCGCTACTGCTGTCCCA  
ATACGTGTTGCGAGTGCCTTATTATTAATTTTATGTTTTTGGTTTGTGTTGCAACATC  
CCAATTAACACATTTTTTGTATATTTGATTTTTTTTTTACTTACCTTGTTTACTTTTACA  
TCTATATACATTTTTTACTTTTGAATAAACTTGTTATATTTTTTGTGATTAAATATGGTGG  
CTACACGTGCACGGCGTCGGAAGCGAGCATCTGTAACACAATTATATTCTACATGCAAAG  
CTGCTGGTACATGTCCTCCTGATGTTGTGAATAAGGTTGAAGGTACTACATTGGCCGATA  
AAATATTACAGTGGAGTGGGTGGGTATATTTTTTGGGTGGCCTAGGTATTGGTACTGGGT  
CTGGATCTGGGGGCGTACTGGATATATCCCTTTAGGTGGTGGGGGTGCGCCAGGCGTGG  
TGGATATTGCTCCTGCAAGGCCACCTATTATAATTGACCTATGGCACCATACTGAACCTT  
CTATAGTAAATTTGGTTGAGGACTCTAGTATTATTCAGTCTGGGTCTCCTATACCTACCT  
TTACTGGTACCGATGGCTTTGAAATTACTTCATCTTCCACAACAACCCCTGCTGTGTTGG  
ACATCACCCCATCTGCTGGTACTGTACATGTTTCTAGTACTAACATTGAAAATCCTTTAT  
ATATTGAACCTCCATCCATTGAGGCTCCACAATCTGGAGAAGTGTCAGATATATATTTAC  
TAGTACACTACTCTGGTACTCATGGGTATGAAGAAATACCTATGGAAGTGTTTGCATCCA  
ATGTCAGTACTGGTACTGAACCTATTAGCAGCACACCTACTCCAGGGGTAGTCGCATAG  
CTGCTCCCCGCTTGTATAGTAAGTCTACACACAGGTTAAAGTTACAAATCCTGATTTTA  
TTAGTAAGCCATCCACATTTGTTACATTTAATAATCCTGCTTTTGAGCCTATTGACACAT  
CCATAACTTTTGAGGAACCTGATGCTGTTGCACCTGATCCTGATTTTCTGGATATTATTA  
CACTGCACCGCCCTGCCCTTACATCTCGTAGAGGCACAGTACGCTTTAGTAGGTTAGGTC  
AAAAGGCCACCATGCGCACTCGTAGTGGCAAACAAATTGGTGCTCGTGACATTATTATC  
ATGATATTAGTAGAATTGCACCAGCTGATGAACTTGAAATGCAGCCTTTACTTTCACCTT  
CTAATAATTATAGTTATGACATTTATGCTGATTTAGATGAAGCTGAAACAGGTTTTTATAC  
AGCCACACACACCACACCTATGTCACACTCCTCTTTGTCTAGGCAGTTGCCCTCCTTAT  
CTTCATCTATGTCTTCATCTTATGCAAATGTTACTATTCCATTTTCAACTACATATTCTG  
TTCCTATTACATACAGGGCCTGATGTGGTATTGCCACATCTCCTACAGTATGGCCTTATG  
TTCCCCACACTTCCATTGACACCAAGCATTTCTATTGTTATACTAGGTGGGGATTACTATT  
TGTGGCCCTATACACATTTACTACGCAAACGCCGTAAACGTATAACCTATTTTTTTTACAG  
ATGGCATTGTGGCGCACTAATGACAGCAAGGTGTATTTGCCACCTGCACCTGTGTCTCGA  
ATTGTGAATACAGAAGAATATATCACACGCACCGGCATATATTACTATGCAGGCAGTTCC  
AGACTAATAACATTAGGACATCCCTATTTTCCAATACCTAAAACCTCAACGCGTGCTGCT  
ATTCTAAAGTATCTGCATTTCAATACAGGGTATTTAGGGTACAGTTACCAGATCCTAAC  
AAGTTTGGACTCCCGGATCCAAATTTATATAATCCAGACACAGATAGGTGGTGTGGGGT  
TGTGTGGGCGTTGAGGTGGGCAGAGGACAGCCCCCTGGTGTTGGCCTTAGTGGTCATCCC  
TTATTTAATAAATATGATGACACAGAAAATTCACGCATAGCAAATGGCAATGCACAACAA  
GATGTTAGAGATAACACATCTGTTGACAACAAACAGACTCAGTTATGTATAATAGGCTGT  
GCTCCACCTATTGGGGAACACTGGGGTATTGGCACTACATGCAAAAACACACCTGTACCT  
CCAGGAGACTGCCCCCCCTGGAACCTGTATCCCTCTGTCAATTCAGGATGGCGATATGATT  
GATACAGGGTTTGGAGCTATGGATTTTCGCTGCCCTACAGGCCACCAATCAGACGTCCCT  
TTGGATATTTACAGTCTGTTTGTAAATATCCTGATTATTTAAAATGTCTGCAGACACA  
TATGGTAATTCATGTTTTTTTCAATTTACGCAGGGAGCAAATCTTTGCTAGGCACATTAT  
AATAAACTTGTAGGTGTTGGGGAAGACATTCCTAACGATTATTATATTAAGGGTAGTGGT  
AATGGCCGTGACCCTATAGAAAGTTATATATACTCTGCTACTCCCAGTGGGTCTATGATA  
ACATCTGATTCTCAAATTTTTTAATAAGCCTTATTGGCTCCACCGTGCGCAGGGTCACAAT

AATGGCATTGCTGGAACAATCAGCTTTTTATTACCTGTGTTGATACTACCAGAAGTACA  
AATTTAACTATTAGCACTGCCACTGCTGCGGTTTCCCCAACATTTACTCCAAGTAACTTT  
AAGCAATATATTAGGCATGGGGAAGAGTATGAATTGCAATTTATTTTCAATTATGTAAA  
ATTACTTTAACTACAGAGGTAATGGCTTATTTACACACAATGGATCCTACCATTCTTGAA  
CAGTGGAATTTTGGATTAACATTACCTCCGTCCTGCTAGTTTGGAGGATGCATATAGGTTT  
GTTAGAAATGCAGCTACTAGCTGTCAAAAGGACACCCCTCCACAGGCTAAGCCAGATCCT  
TTGGCCAAATATAAATTTTGGGATGTTGATTTAAAGGAACGATTTTCTTTAGATTTAGAC  
CAATTTGCATTGGGTCGCAAGTTTTTGTGTCAGGTTGGCGTACAACGCAAGCCCAGACCA  
GGCCTTAAACGCCCGGCCCTCATCGGCATCCTCCTTCCTCCTCCTCAGCCAAACGTAAA  
CGTGTTAAAAAGTAATGTATGTTAGTTTTTGTATGCTTGTGCACACTGTTGTATGCCTGT  
ATGTATATGTTTGTGTATGTACTGTATGTGTTTTTGTGTGTGTGTGTGTGTTGTTGTTCTGT  
TATGTATGAGTTATGTATGTTTATTATTAATAAACTATGTGGTGTGTGTGTGTGTGTTTT  
TGCATGACTGCATTTGTATGACATGTACGGGTGTATGTGGGTATTACATTATCCCCGTAG  
GTCAAGGGTGGTGTTTCGGTGGCGTCCCTATTGCCCTACCCATTTTTTGCAGCACAACAG  
TTTATATTTGTGCTATTTAGTTATACTTTGTAGCTTCCATTTTGTACAGCTGCAGCCAT  
TTTGAGTGCAACCGATTTTCGGTTCGTGTACTTTTAGTATATTTGCCAAGTTTTAAACCAC  
AACTGCCAGTTGTTTTTGGCATAAACCATCATTTTTTTATGACATAGTGCATACATCCGC  
CCGCCCACGCCTTGTACTTTGGCGCGCCTTACCGGCGCTAGTCATAACAACCTATTAGTCAT  
TTGTACTTTAACAATTTGTGGCACACTGTTTCCGCCCTATAATAATTTAACTGCTTATA  
GGCATGTATTTTTTGGCATATTTTATCTTACTAATTGCATAGTTGGCAGGTCAAATACTA  
TGTTTTTTAGTGCCAAAGTTTCTATCTACTTATAAACCATCTTACTCATATGCAGGTGTGC  
TACACAAATGTGTTACCTAACCGATTTGTGTTCTGCCTATGCTTGCAACATTTTTTCTTA  
TAACATTT

>gi|333062|gb|M32305.1|PPH47CG\_Human\_papillomavirus\_type\_47\_(HPV-47)\_+-  
sense\_strand

AACGGTAAAGTTTGCATTAATGTACCAGGTGCGGTACAGATCATTTTACAATGGATATTAT  
TGTTGCCAACTACCATAGTCATAATCAAGTTCTTGCCTGTATCGTTTTCGTACCTTACCT  
ACAGTATTTTATATTAATATATAAATAAATAAATATATAAATGTGTATTTATTTCTCAGG  
CTCAGTTCTTTGCAATTATTAAGACAAATGGCTCAGAAGGCTTTGGAACAGACTACAGTT  
AAAGAGGAAAAGCTAGAACTACCTACTACTATTAGAGGCTTAGCTCAATTGTTAGACATA  
CCTTTAGTAGATTGTTTGCTACCTTGCAACTTTTGTGGCAGATTTCTTGACTATTTAGAA  
GTTTGTGAATTTGATTATAAAAAGCTTACTTTAATTTGGAAAGACTACAGTGTATGCTTATGCC  
TGCTGCCGTTTGTGCTGCTCAGCAACTGCCACATATGAATTTAATGTTTTTTATCAACAA  
ACAGTGTTAGGTAGAGATATTGAGCTAGCTACAGGCCTTTCCATTTTTGAGATTGACATA  
AGGTGTCATACCTGCCTGTCATTTCTTGACATTATTGAAAAGTTAGATAGCTGTGGAAGA  
GGACTTCCCTTTTACAAAGTAAGAAACGCCGGAAGGGTGTGTTGTAGGCAGTGTAAGCAT  
TTTTACAATGATTGGTAAAGAGGTACCCGTGCGAGATATTGTTCTGGAGTTAAGTGAGGT  
TCAACCTGAAGTATTACCAGTTGACCTGTTTTGCGACGAGGAATTACCAAAATGAACAACA  
GGCGGAGGAGGAGCTAGACATCGACAGAGTCGTTTTCAAAGTGATTGCACCCGTGCGGTTG  
CAGCTGCTGCGAGGTCAAGCTTCGCATTTTTGTGAACGCAACAAACCGTGGCATCAGGAC  
ATTTACAGGAACTTTGGACTGGTGATCTGCAGCTCCTCTGCCCAGAGTGCCGTGGGAACCTG  
CAAACATGGCGGATTCTAAAGGTAGTACATCTAAAGAAGGGTTTGGTGATTGGTGTATTT  
TGGAAGCTGACTGTAGTGATGTTGAGGATGATTTGGGACAATTATTTGAGAGAGATACAG  
ACTCAGATATCTCGGACCTGTTAGACAATTGTGACCTGGATCAGGGCAATTCACGGGAAC  
TATTTTCATCAACAGGAGTGTAAGCAAAGCGAGGAGCAATTACAAAACTAAAACGAAAGT  
ATCTTAGTCCAAAAGCTGTCGCGCAGCTTAGTCCGCGTCTTGAGTCAATTTCAATTGTCAC  
CTCAGCAGAAATCCAAGAGAAGGCTCTTTCGAGAGCAAGACAGCGGACTCGAGTTAACCT  
TTAACAATGAAGCTGAAGATGTTACTCCTGAGGTGGAGGTACCGGCTATAGACTCTCGGC  
CGGATGATGATGAGGAGGATCAGGGGATCTAGATATTATTATACAGCATGTTGCGGTT  
CCAGCAACAAAAAGGCCACATTACTGGCAAAATTCAAACAAGCGTTTGGGGTAGGCTTTA  
ATGAATTGACAAGACAATTCAAAGCTACAAAACCTGCTGTAATCATTGGGTGTATCCG  
TATATGCAGTCCATGATGATCTATTTGAAAAGCTCAAAGCAGCTGTTGCAACAGCATTGTG  
ACTATATATGGGTCCGTGGGATAGATGCAATGTCTATTATCTATTGTGTTTTAAGGCGG  
GAAAAAATCGTGGGACAGTTTATAAGCTAATTACCACAATGTTAAATGTGCATGAGCAAC  
AGATATTGTCTGAGCCTCCAAAGTTAAGAAATACAGCTGCTGCATTATTTTGGTACAAAG

GATGTATGGGACCTGGAGTGTTACCCACGGTCCTTACCCTGAATGGATTGCACAATTAA  
CCATTTTGGGCCATAAGAGTGCTGAGGCAAGTGCCTTTGATCTGTCAGTCATGGTTCAAT  
GGGCATTTGATAACAATCTGTTTGAGGAGGCAGACATTGCATACGGATATGCAAGACTGG  
CACCAGAGGATAGCAATGCAGTTGCATGGCTTGCACATAATAACCAAGCTAAATATGTTA  
GAGAATGTGCTATGATGGTTCGATACTACAAAAAGGGGCAAATGAGAGATATGAGCATGT  
CTGAGTGGATATATACAAGGATACATGAAGTAGAGGGAGAAGGACAGTGGTCTAGCATTG  
TTAAATTTTAAAGATATCAAGAAATAAATTTTATTTTCATTTTTGGCTGCTTTAAAAGATT  
TATTACATTCAGTACCTAAACGCAATTGTATTTTATTTCCATGGCCCTCCAAATACAGGAA  
AGTCATCGTTTTGGAATGTCTTAATAAAAAGTTCTAAGGGGGAGAGTATTATCATTGTAA  
ACTCCAAAAGTCAGTTTTGGTTGCAGCCTCTTGGAGAATGTAAAATAGCATTATTAGATG  
ATGTTACAGATCCATGTTGGGTGTATATGGATCAATATTTAAGAAATGGGTTAGATGGGC  
ATTTTGTGTCTTTGGATTGTAAATATAGAGCACCATGCAAACAAAGTTTCCACCTTTAA  
TACTTACATCTAATATTAATGTACATGCAGAGACCAATTATAGATACCTACATAGTAGAA  
TTAAGGGTTTGAATTTAAAAATCCATTTCCATGAAAGCAGATAATACACCTCAATTTG  
AGTTAACTGACCAAAGCTGGAAATCTTTTTTACAAGGCTTTGGACACACTTAGACCTGA  
GTGACCAAGAAGACGAGGGCGAACATGGAGAATCTCAGCGAGCGTTTCAATGCTCTGCAA  
GAACAGCTAATGAACATTTATGAAGCTGCAGAACAGACATTAAAGGCACAAATTTTACAT  
TGGCAGACATTGCGAAAAGAAGCTGTGACACTCTACTTTGCTAGGCAGAAAGGCATAAAT  
AGGTTGGGATACCAACAGTGCCTGCATTAGCAATATCTGAGGCAAGGGCCAAAGAGGCT  
ATATATATGGTGTTGCGAGTTAGAGTCGCTACAAAAATCAGCGTTTGCTTTGGAGCCTTGG  
ACCTTAGTGGACACTAGTACAGAGACTTTTAAAGAGTGCTCCAGAAAATCATTTTAAAAAG  
GGGCCTGTACCTGTGGAGGTGATATATGACAAAGATGAAGCAAATGCTAATTTGTATACT  
ATGTGGACATTTGTGTATTACATGGATTTCAGATGATGTGTGGCATAAGACAACAAGTGGG  
GTCAATCAAACCTGGCATTTACTACCTATATGGAACATTTAAACACTATTATGTGTTATTT  
GCTGATGATGCAAAGAGATATAGTGCTACTGGAGAATGGGAAGTTAAAGTTAATAAGGAA  
ACTGTGTTTACTCCTGTCACTAGCTCCACACCACCAGGGTCACCAGGAGGACAAACAGAC  
CCAGACACCTCCTCCAAGACCCCCACCACCACCACAGCCGCCACTGACACCTCGCCCAGA  
CGCCAATCCATCAATAAACAGTCAACAACAAACCGAAACCAAACGAAGAGGGTACGGACGG  
AGACCATCAAGCAGAACAAGGCGACCGCAAACGCACCAAAGGCGATCCAGATCCAGATCC  
CGGTGCGGGTCCAGTTCTCAAACCCACTCTTCCACCACCACCACCACCACCTACAGG  
TCCAGGTCTACGTCGCTCAACAAGACTCGTGCTCGTTCCAGGTCAAGGTCCACCTCCAGA  
TCTACCAGCACCACCAGTAGAAGGGGAGGTAGAGGGTCATCCACAAGGCAAAGATCGCGA  
TCACCCTCCACCTACACCTCAAAACGGTCACGGGAAGGAAACACAAGGGGCAGAGGGAGG  
GGGAGACAAGGGAGAGCAGGGAGCAGTGGGGGGAGAGAGCAGCGACGGAGAAGGAGATCA  
TTCTCAACCTCCCCTGACTCCTCCAAACGAGTCAGACGGGAGTCTCCTAAATACCGTGGC  
GTGTCTCCTAGCGAGGTGGGAAAGCAACTTCGATCAGTTGGTGCAAAACATTCAGGGCGA  
CTTGGAAGGTATTGGAGGAAGCTAGGGACCCCCAGTAATTTCTGTGCGAGGGGACGCA  
AACACATTTAAATGCTTTTCGCAACAGAGCAAGGAACAAATATAGAGGGCTTTTTTAGATCA  
TTCAGCACTACATTTTCTGGGTAGCTGGAGATAGCATTGAGCGTCTAGGCAGGTCCAGA  
ATGCTCATTAGCTTTTCTGCCTCACTCAGAGAAGGGATTTTGATGATGCTGTCAAATAT  
CCAAAAGGAGTCGAGTGGTCATATGGTAGTCTTGATAGCCTTTAACAAGCATTAACGCTG  
CTTTGCTACTAACTGCTATTAACAACCACAGCTTTTTTTTTTACGTTTTTTTATTTTACTG  
ATTTTGTACTGCAATGGCGCGTGCTAGAAGGGTCAAACGTGACTCTGTAAACATATATA  
TCAGACCTGCAAACAGGCAGGCACTTGCCCCCTCGGACGTTGTTAATAAAGTTGAGCAAAC  
AACAGTTGCTGACAATATTTTGAATATGGCAGTGCTGGTGTCTTTTTTGGAGGCCTTGG  
CATAGGAACAGGCCGAGGGACTGGGGGTGCTACTGGGTACGTGCCACTTGGGGAAGGTCC  
TGGTGTCCGTGTGGGAGGAACCCCAACGGTTGTAAGGCCTTCTCTTGTTCCTGAAGCAAT  
TGGACCAGTTGATATTTTACCATTGACACAATCGCACCTGTCTGAGCCTACTGCTTCATC  
TTTAGTCCCATTAAACAGAGTCGTCGGTGATTTTACTTCCCAGTGAAGTTGAAACTAT  
AGCCGAAATACATCCTATTCTGAAGGTCCGACAATCGACTCCCCTGTAGTCACCACAAC  
GACAGGTTCCAGTGCTGTTCTGGAAGTGGCTCCAGAACCTGTACCCCCCTACACGTGTTAG  
AATTGCTAGAACACAATATCATAATCCCCTCTTTTTCAGATACTCACTGAATCAACACCTGC  
GCAGGGCGAGAGTTCTCTTGCTGACCATATTTTGGTCACCTCAGGGTCTGGTGGACAAAG  
GATAGGCGGTGATATAACAGACGAAATTGAACTTACTGAGTTTCCAAGCAGATATACATT  
TGAAATAGAAGAACCACCCCTCCACGAAAAAGTAGCACACCATTACAACTGTAGCCTC

TGCAGTAAGGCGACGGGGCTTCTCATTAACAAATAGAAGATTGGTACAACAAGTAGCTGT  
AGACAATCCTTTATTTTAAAGTCAACCTTCTAAGATGGTAAGATTCTCATTTGACAATCC  
AGCTTTTGAAGAAGAGGTTACCAATATTTTGAACAGGATGTTAACAGCTTTGAAGAACC  
TCCAGACAGGGATTTTCTTGATATTAAACAATTGGGCCGTCCTCAATATTCTACAACACC  
AGCAGGTTATATTAGGGTAAGCAGACTAGGAACTCGAGGCACCATTTCGCACTCGTTCTGG  
TGCACAAATAGGTTCTCAGGTACACTTTTATAGAGATTTAAGTTCTATAAAATACTGAGGA  
TCCAATAGAACTACAGCTTTTAGGGCAGCATTTCTGGAGATGCTACTATTGTTCAAGGTCC  
TGTAGAAAAGCACATTTATAGATATGGACATTGCTGAAAACCCCTTTATCTGAAACAATAGA  
TGCTTCATCTAATGATTTACTTTTTGGATGAGACTGTGGAGGATTTTAGTGGGTCCCAATT  
AGTAATTGGAAATCGAAGGAGTACAACATCATATACTGTTCCCAGATTTGAGACTACTAG  
AAGTAGTTCCTATTATGTTCAAGACACAGATGGTTATTATGTTGCTTACCCAGAGTCACG  
GGACACTATTGATATTATTTACCCTACACCTGAATTACCTGTAGTTGTCATTCACACCCA  
TGACAATTCTGGAGACTTTTACTTACATCCTAGTCTTAGAAGGCGTAAGCGTAAAAGAAA  
ATATTTGTGATTTGCATTGCAGATGGCAGTGTGGCACTCGGCTAACGGTAAAGTATACCT  
TCCTCCATCAACACCAGTGGCCAGGGTTCAAAGCACGGATGAATACATACAAAGGACTAA  
TATCTATTATCATGCAAATACTGACCGCCTTTTAAACAGTAGGACATCCATATTTCAATGT  
ATACAATAATAATGGAACATACATTAGAGGTTCAAAAGTATCAGGTAATCAGCATAGGGT  
GTTTCGCTTAAAATTGCCAGATCCTAATAGATTTGCTCTAGCGGACATGTCTGTATACAA  
CCCTGACAAAGAACGCTTGGTGTGGGCCCTGCAGGGGTCTAGAAATTGGAAGGGGTCAACC  
TTTAGGTGTTGGCAGTACTGGTCACCCATATTTTAAATAAGGTAAAAGATACAGAAAACAG  
TAATTCTATATCACAAACTCAAAGATGACAGACAAGACACCTCTTTTGATCCTAAACA  
AATACAGATGTTTATTGTGGGCTGCACTCCATGTATTGGCGAACACTGGGATAAGGCAGA  
GCCTTGTGGGGAACAGCAAACCTGGTCTTTGTCTCTCTATTGAATTAAAAAACACATACAT  
TCAGGATGGCGACATGGCAGACATTGGTTTTGGCAACATTAATTTCAAGGCCTTACAACA  
CAGTAGGTCTGATGTTAGTCTTGACATTGTAAATGAAACTTGCAAGTACCCGGATTTTCT  
CAAAATGCAAAATGATGTTTATGGGGATGCTTGCTTTTTTTTATGCTCGTAGAGAGCAATG  
TTATGCCAGACATTTTTTTTGTAGAGGGGGAAAAACAGGTGATGACATACCAGGAGCACA  
GGTTGGCAATGGTAATATGAAAAATCAATTTTACATTCCTGGTGTACGGGTGTCAGGCTCA  
GAGCACTATAGGTAATGCCATGTATTTCCCAACTGTCAGTGGCTCACTAGTCTCTAGTGA  
TGCTCAACTGTTTAAACAGGCCATTCTGGCTCCAAAGGGCTCAGGGTCATAATAATGGCAT  
TCTGTGGGCTAATCAAATGTTTGTACAGTTGTAGACAACACAAGAAATACAAATTTTCA  
CATCTCTGTTTACTCTCAGGCAGGGGACATAAAGGATATACAGGATTATAATGCAGACAA  
TTTTAGAGAGTATCAAAGACATGTGGAGGAATATGAAATTTCTGTAATATTACAATTGTG  
CAAAGTTCCTTTAAAGCAGAAGTTTTAGCACAAATTAATGCCATGAATTCGTCTCTTTT  
AGAGGAATGGCAGTTAGGATTTGTGCCTACTCCAGACAACCCTATTCAGGATACATATAG  
ATATCTAGAATCTTTGGCCACTAGGTGTCTGAAAAGTCTCCTCCAAAAGAGAAGGTTGA  
CCCCTACAAAGGTTTAAACTTTTGGGATGTGATATGACAGAGCGCCTTTCCCTGGATTT  
AGATCAATATTCATTAGGTAGAAAGTTCTTATTTCCAGGCTGGATTACAGCAGACGACCGT  
AAACGGTACAAAAACAACCTCCTTACAGGGGGTCCATCAGAGGAACAAAGCGCAAACGAAA  
AAATTGAAGATGACCGTTTTTCGGTACAGATTGTTTAACTTTTACACAGTATTCAAGGAAT  
GTCTGTTTACTGTGACTAAGTGTAACTCTGCCAAAGAAACAACCGCACCCGGTACACGTA  
TTCAGCTTGTGCCAAAACAGATAAGCTTGGCAGTCAGAACACACCGTGTTCGTGCGAAC  
ACGCTCGGATTAGGTCTTCTGCCAAAAGAAATTTAATCTTGTTATCGTTTTTGGCGATCA  
CATTTGGCACCGCGGCAGCTGTTTTGGCACTACAAGACAACCGTT

>gi|3228267|dbj|D21208.1|\_Human\_papillomavirus\_type\_67\_complete\_genome  
TTATAATCCTGTGTTTAAAAAAGTAGGTGTAACCGAAAACGGTTTGACCGAAAACGGTAA  
ATATATAAAGCACACCAGTGTCCACCTACAGTGCAAGAAATATGTTTCAGGACACAGACG  
AAAAACCACGCAACCTGCACGAATTGTGTGAAGCTTTGGAACCCACGGTGCATGAAATAA  
GTTTGCCCTGCGTGCAGTGCAAAAAAAGCTTTGGACAGAAACGAGGTATATGACTTTTTTAT  
TTACTGATTTGAAAATAGTATACAGATGTGGGAATCCGTATGGGGTATGTAAGCAATGCC  
TAAGACTGTTTATCAAAAGTTAGTGAATATAGATATTTTAACTATTTCAGTATATGGAAATA  
CTTTAGAAAGAAATTGTGCATAAACCATTAAATGAAATTACAATACGATGTATAACATGTC  
AAAGACCATTGTGTCCACAAGAAAAGCAAAGGCATGTTGATCGAAAAAGCGATTTTCATA  
ATATTTCCAATCGTTGGACAGGACGGTGTTCAGTGTGTTGGAGACCTCAACGAACGCAGA  
CCCAGGTATAATATTTGAAGCCATGCGTGGAGACAAAGCTACATTGCAAGATTATATACT

AGATTTAAAACCCGAAACAACTGACCTATACTGCTATGAGCAATTGCATGACAGCTCAGA  
TGAGGAGGATGAAGTAGGCATGGACCGGCCAGATGGACAAGCAAAACCAGATACAACCAA  
TTACCATATTGTTACTGTGTGTAACATCTGTGAGTGCACCTTTGCGTTTGTGCATTACAG  
TACAGCAGCAGACGTCCGAACAATCCAGCAGATGCTTATGAACACACTAGGAATAGTGTG  
TCCCACCTGTGCACAACAATAAACATCATCTGAAATGGAGGACCCGGAAGGTACAGACGG  
GGAACAGGGGGGGTGTACAGGATGGTTTTAGTGTAGAAGCAATAATTGAAAAAGAACAGG  
AGATAAGGTATCAGAGGATGAGGATGAGGATGCATCTGACACTGGTAGTGATTTAATTGG  
CTTTATAGATGATACACATATAGAAAACATACAGGCAGATACACAGGCAGCCCGCGCATT  
ATTTAATTTACAGGAAGAGGAGGATGACCTAAACGCTGTGAGTGCACCTAAAACGAAAGTT  
TACAGGCATACAGGCATGTGGTGGTAATAGTAATGGTATAGAAAAACCAAGCATGTACAGC  
CGCAAAACGCAGAGCATACGACATAGAAGACAGCGGATATGGCAATACTGAAGTGGAAC  
TCAAGAGACAATGGTGCAGGTAGAGGGGCAAAATGGCGATATGCAGTGCAGTAGTCAGTG  
TAGTACGGGGGCAAGTAGTACGGGAAACAGTGTAGATATGCAATCGGAAAGTAATAGTAG  
TCAGGAACAAAGCATGCCATTGCAAACTGTGGAAAATATTATGCATGTAAATAATATAAA  
GGCAACGTTAATGCATAAATTTAAGGAAGCATATGGGGTAACGTTTACACAGCTAATAAG  
ACCATTTAAAAGTGACAGGACAAGCTGTACAGATTGGTGTGTTACAGCGTTTGGAATAAC  
ACCATCAGTAGCAGAAAAGTTTAAAGGTGTTAATCAAGCCACAAACGTTGTACACACATTT  
ACAATGTTTAACTGTGACAGAGGTATTATTATATTATTATTAGTAAGGTTTAAATGTGC  
AAAAACAGGTTAACAGTGTCAAAATTAATGTCTAATTTATTATCAATTCCTGAAACGCA  
TATGATAATTGAACCACCAAAATACGGAGTACAACGTGTGCACCTATATTGGTTTAGAAC  
AGGAATGTCAAATATAAGTGAAGTAAGTAGGGCAAACACCAGAATGGATAGAAAGACTAAC  
GGTACTGCAACATAGTTTTGATGATACTATATTTGATTTAGGAGAAATGGTGCAATGGGC  
ATATGACAATGACATAACAGATGATAGTGAAAATAGCATATCAATATGCAATGCTGGCAGA  
TGTA AACAGTAATGCCGCAGCATTTTTTAAAAAGTAATTCGCAAGCCAAAAATAGTAAAGGA  
TTGTGGTACCATGTGCAGACACTATAAAAAGAGCAGAAAAACGAAAAATGACAATAGGACA  
ATGGATACAAGCTAGATGTGAAAAAGTAAATGATGGAGGAGACTGGAGAACAATAGTAAA  
GCTATTAAAGATACCAAAATGTAGAATTTACACAGTTTTTTAGCAACATTTAAAAAGTTTTT  
AAAAGGTATACCTAAAAAAAGTTGTATGGTAATATGCGGACCACCAAAACACAGGGAAAAC  
ATATTTTGCATGAGTTTAAATCCACTTTTTTACAAGGATGTGTAATATCATATGTAAACGC  
CAAAAGTCATTTTTTGGCTACAACCATTGTCAGATGCAAAAATAGGAATGATAGATGATGT  
TACAGCAATATGCTGGACATACATAGATGATTATTTAAGAAATGCACTTGATGGAAATGA  
TATTTCAATAGATGTAAAGCATAAAGCGTTAGTACAGCTAAAATGTCCACCATTACTATT  
AACTTCCAACATAGATGTAGCAACAGATTCAAGATGGCCGTTTTTTACATAGTAGAGTAGT  
AGTGTTTAGATTTAACAATCCATTTCCGTTTGATGAAAATGGCAATCCAGTATATAACTT  
AAATGACGAAAATTGGAAATCCTTTTTCTCAAGGACGTGGTGCCAATTAGATTTAATTGA  
GGAAGAGGACAAGGAAAACCATGGAGGAAAATTGCAACACGTTTTAAATGCAGTGCAGGAGA  
AAATTCTAGATGTATACGAAGCTAATAAAAAAGACTTATGTACACAAATTGAACATTGGA  
GACTGAGACGCATTGAATGTGCTTTGTATTATAAAGCTAAAGAACTGGGACTGGCACGGA  
TAGGCCACCAGGTGGTGCCACCTATGTCAGTTACAAAGGCCAAAGCCTGTCAAATAATTG  
AACTGCAAAATGGCATTACAAACATTAATGAAACACAATATAGTAATGATGAATGGACAT  
TGCAAAGTACCAGCCTAGAACTATGGTTATGTGAACCAAAAAAATGTTTTAAAAAAG  
GAGAGACTGTAACAGTGCAATACGATAATGATAAAGAAAATACAATGGAATATACAAGTT  
GGAATGAAATATATATAGTAAAGGACTCTGTGTGGACAGTGGTAGTGGGAAAGGTGGACT  
ATATGGGACTATATTATATATATGAAACAGAAAAACGTATTATGTAAAGTTTGAACCG  
ATGCTAAAAAGTATTCAAAACAAAACATTTGGGAAGTGCATGTGGGTGCTCAGGTAATTG  
TTTGTCTACATCTATGTTTAGTAACGAAATATCCACTACTGAGGTTGCTGCCCGGATAC  
CACACGCCACAGAAACGTATACCCCTGCCACCACCGCGTGCACCAAGAAAAACAGGCGC  
CTGCCAAACGACGACGACCTGACGTCCCAGACTTCTGCAACAACCTCCAGCACCCCA  
AGCTATTGTGCAGACAACCGTCCGTGGACTGTACATCGGTGGGGCTCGTCCCTGGACCTC  
AGTGCACAAACAAAGGACGGAGTGTGTGTGCACCTAACACTGCACCTATAGTGCATTTAA  
AAGGTGACCCTAATAGTTTAAAGTGTTTAAAGATATAGATTAAAATGTAATACAGATTTAT  
ATTGTCATATGTGCATCCACATGGCATTGGACCAGTGGAACCATACAAAACTAAAGAAG  
CTATTGTTACTGTTACATATGCCAGTGAAACACAACGACAACAGTTTTTTAACTCTGTAC  
GCATACCCCCCACTGTGCAAATTGTTTGTGGTATAATGTCATTGTAATATATTGTATATT  
ACTACATTACACACAAGCCAATATGTGCTGCTAAGTTGTATATATAGGTATACTATACAA

TGCTGGCCATTTTTGTATTTGCATTTGTGTTGCTGTTGTGCTTTTGTATTGTGCTACGTC  
CGCTTTTGTCTTCCATATATGTGTATGCATTATTGCTGGTGCTGGTGCTGGTGCTATGGG  
GTTTTATAGGTTCCCCCTTACGGGTATTTTTGGCATATCTTATATTTTTGTACCTACCTA  
TGATGTGTATTCAATTTACATGCACAGTATATTGTTTCCTAATACTTTGTATACTGTATGT  
ATTTGTACATATTTATTGTTTTGTGCACAGTGTGGTACAATGGCATACTTTTATATTTA  
CTAATAAACCATTTTTTTTTACTAGTGTGTACAATGAGACACAAACGATCTACAAG  
GCGCAAACGTGCCTCTGCAACACAACCTATATCAAACATGCAAGGCGGCAGGCACCTGTCC  
CCCGGATGTTATTTCCTAAAGTGGAAGAACCACCATTCAGATCAAATTCCTAAATTTGG  
CAGTTTAGGTGTTTTTTTTGGAGGCCTTGGTATTGGTACTGGGTCTGGTACGGGTGGTAG  
AACAGGTTATGTCCCTTATCTACACGGCCTCCCACTGCATCTGCGCCTACATCTACAAT  
ACGACCCCTGTATCTGTTGATACTGTAGGGCCCCCTAGACTCTTCTATTGTGTCTATGAT  
AGAAGAAACAAGTTTTATTGAGTCAGGTGCACCTGCACCATCTATTCCAACAGCATCTGG  
ATTTGATGTTGCAACTTCTGCAGACAATACTCCTGCAATTATTAATGTTTCATCTATTGG  
TGAATCTTCTGTACAATCTGTTACCACCCATTTAAATCCCACTTTTACAGAACCTTCAGT  
ACTCCGCCCATTTTCATCTTCTGAAGCCTCTGGTCATTTAATATTTTCTACACCCACTAT  
TAGTACACATTCATATGAGGACATTCCATGGATACCTTTATTGTTTTCTACTACTAGTGA  
CAATGTAAC TAGTAGCACCCCTATTCCTAGGCCTCGCCCCACGGCAGCCCTTGGTTTATA  
TAGTAAAGGCACACAACAAGTTAAGGTTGTTGACCCTGCTTTTTTGACATCGCCTCGTAG  
ATTAATACATTTGATAATCTGCATTTC AACCTACAGAACCTGATGAAACACTTTACTT  
TCAACACCAAGACATTTACCTGCACCTGACCCTGACTTTTTTAGACATAGTTGCATTACA  
TAGGCCTGCTTTAACATCTCGCAAAGGCACATTAGATTTAGTAGGTTAGGTAGTAAGGC  
TACAATGAAAACACGTAGTGGCAAACAAATTGGTGCTCGGGTGCATTATTATCAGGATTT  
AAGTCCTATAGTACCTGCTGACTCCATAGA ACTACAGCCATTATCTCGCCCTGTGTCTTC  
TGCTTCCCATTCTATTAATGATGGTTTATATGATGTATATATGGATCCTGACACACCCTT  
TCCACAGCCATCAATATCCTATTACATTACATAGTCCTCAGACCACCAATGTTACTGTCCC  
CTTAAGTAGTGGTTTTGATTTTCCATTTTCCCTCTACTGTACCATTACAGCCAGGTCCCGA  
TATTGTGTCCCCTGTAGCCCCTACATACACTCCTTTTGTACCTGTTATACCTACATCTCC  
CTTTAACAATGTACTTGTTTATGGTAGTGATTTTATTTTACACCCTAGTTATTTTTTACG  
TCGCAGGCGTAAACGGTTTCCATATTTTTTTGTCAGATGTCCGTGTGGCGGCCTAGTGAGG  
CCACTGTGTACCTGCCTCCTGTGCCTGTATCTAAGGTTGTAAGCACTGATGAATATGTGT  
CACGCACAAGCATTTACTATTACGCTGGTAGCTCCAGACTTTTAGCTGTAGGCCATCCTT  
ACTTTTCCATTCCTAATCCCTCCAACACTAAAAAGGTGTTAGTGCCCAAGGTGTCAGGTT  
TGCAGTATAGGTTATTTAGGGTTTCGTTTACCAGATCCCAACAAGTTTGGATTTCCAGACA  
CATCTTTTTTATAACCCTGACACACAGCGCTTAGTATGGGCTTGTGTTGGTATTGAAATAG  
GGCGAGGACAGCCTTTGGGTGTTGGTATTAGTGGACATCCATTACTTAATAAGTTTGATG  
ATACTGAAACAAATAATAAATACCCTAGCCAGCCTGGTACTGATAATAGGGAATGCTTGT  
CTATGGATGCTAAGCAAACCCAGCTATGTATTATTGGTTGTAAACCTCCTACAGGTGAAC  
ACTGGGGTAAAGGTACCCCGTGTAGTGGTAACAGTAATGGGCCAGGTGCCTGTCCCCCTT  
TGGAAC TTATGAATACTGTTATTGAGGATGGGGACATGATTGATACTGGTTTTGGCTGCA  
TGGATTTTAAATC TTTGTCAGGCCAATAAAAAGTGATGTTCCGTTAGATATATGTACCAGTA  
TTTGTAATAATCCTGATTATCTTGGTATGGCTAGCGAGGCTTATGGGGACAGTTTATTTT  
TCTTCCTGCGACGTGAGCAAATGTTTGTTAGGCATTTGTTTAAACAGAGCAGGTAAATTAG  
GGGAGGATGTACCTACAGATTTGTATTTAAGGGATCTGCAAACACTTCTGCACTGCAAA  
CCTCAGCTTTTTTTCCTACTCCAGTGGCTCTATGGTTTCCTCAGAATCTCAATTATTTA  
ATAAACCATATTGGTTACAACGCGCACAAGGTCATAACAATGGTATATGCTGGGGTAATC  
AAATATTTGTTACTGTTGTAGACACTACACGTAGTACCAACATGACTTTATGTTCTGAGG  
AAAAATCAGAGGCTACATACAAAAATGAAAAC TTTAAGGAATACCTTAGACATGTGGAAG  
AATATGATTTGCAGTTTATATTTTCAGCTGTGCAAAATATCCCTTACTGCAAATGTTATGC  
AATACATACACACCATTGAATCCAGATATATTAGAGGACTGGCAATTTGGCCTTACACCAC  
CTCCTTCAGGTAATTTACAGGACACATATAGATTTGTTACCTCGCAGGCTATTACCTGTC  
AAAAAACATCCCTCCAACAGCAAAGGAAGATCCTCTTAAAAAGTACAGTTTTTGGGAAA  
TCAATTTAAAGGAAAAATTTTCTGCAGATTTAGATCAATTTCCCTTAGGTTAGAAAATTTT  
TATTGCAGGCAGGTTTTACAGCTAAACCTAAACTAAAACGTTCTTCACCTTCTTCTTCCT  
CTTCCTCCTCTGCAAAACGTAAAAAGGTTAAAAAGGTAATTGTATGACTGTTGTGTGTTTG  
TATTGTTTGTATGTATGATTTGTATGTTTGTGTAATGTGTATGTTATGTGTATGCATGTT

CCCTGTGTCTGTCAATTTCTGTTTTTGTTAATAAACATTACATACAATGTAACTATAT  
TGTTGTGTGTCGTGTGGTTGCACCCAATGAGTAAGGTACTGTCCCTATATCCCTGCCCATGC  
CATGCCCTTGCCTATCCCTGTATAATTATATGTAGCATACTGTGTTTGGTATATTTATTA  
CTTTTACTTATAACATTACAGTCTCCATTTTGGGTACTACTCCATTTTATATCTGTAAC  
CGGTTTCGGTTGCTGTTGGCATAGGGTTTTGGTATTCTAGGTTTCTTGCCAACATTGTTA  
ATCTTTGTCTTCCCTGCAGTGCAATGCCTTTACTTGCTGTTGCTCTCCCGCCTAAATTGAC  
TCATGGTATTGCAGTGCAACACGCCCTTTTACATGTTTTAAACTGCTTTTAGGCACATAT  
TTTTACCATGTTTTTATTGCTTAATTGCACCTTTTGGCTTGCACAGCACTATTTTATTGGG  
TTTATGTTACTATTGTAAAGCCAACATACACCTTGTAAAATGATTCAAACCCCTTACTCACA  
CAGGTGTGTATGCACCGGTTTGGGTAAACATGTTCCAACCATATTGTTACATTATTATAA  
A

>gi|1173493|gb|U21941.1|HPU21941\_HumanPapillomavirus\_type\_70,\_complete\_genome

CTTATAACATTTTACAATCATAATTTAAAAAAGGGAGGCACCGAAAAACGGTCACGACCG  
AAAACGGTGTATATAAAACCATGCAAAAGTTGCTTGCCCATACGGAATGGCGCGATTTC  
CAATCCTGCAGAACGGCCATACAAATTGCCTGACCTGTGCACGGCGCTGGACACTACATT  
GCACGACATTACAATAGACTGTGTCTATTGTAAAACACAGCTACAGCAAACAGAGGTATA  
TGAATTTGCATTTAGTGATTTATTTATAGTATATAGAAACGGGGAGCCATATGCTGCATG  
CCAAAAATGTATTAAATTTTCATGCTAAAGTAAGGGAACCTACGGCATTATTCGAACTCGGT  
GTATGCAACAACCTTTGGAAAGCATAACTAATACCAAGTTATATAATTTATCAATAAGGTG  
CATGAGTTGCCTGAAACCATTTGTGTCCAGCAGAAAAATTAAGGCATGTTAATACCAAAG  
AAGATTTCAACCAATAGCAGGAAGCTATACAGGACAGTGCCGACACTGCTGGACCAGCAA  
CCGGGAGGACCGCAGACGTATACGAAGAGAAACACAAGTATAAATATAAATATGCATGGA  
CCACGGCCGACATTGCAAGAGATTGTTTTAGATTTATATCCATACAATGAAATACAGCCG  
GTGCACCTTGTATGTCACGAGCAATTAGAAGATTTCAGACAATGAAACAGATGAACCCGAC  
CATGTAGTTAATCACCACAACAACACTACTAGCCAGACGGGAAGAACACAGCGTCACAAA  
ATACAGTGTATGTGTTGTAAGTGTAATACTACACTGCACTTAGTAGTAGAAGCCTCACAA  
GAGAACCTGCGATCTCTACTGCAGCTGTTTATGGAGACACTGTCATTTGTGTGTCCCTGG  
TGTGCATCGGGAACCCAGTAACCTGCAATGGCCAATTGTGAAGGTACAGATGGGGATGGG  
TCGGGATGTAACGGATGGTTCCTAGTACAGGCAATAGTAGATAAAACAAACGGGCGACACT  
GTGTCAGAGGACGAGGACGAAAATGCAACAGATACAGGTTTCAGACTTGGCAGACTTTATT  
GATGATACTACAGATATTTGTGTACAGGCAGAGCGGAGACAGCACAGGTACTGTATAAT  
ATGCAAGAGGCCCAAAGGGATGCACAATCAGTGCGTGCCTTAAAACGAAAGTATGGAGGG  
AGCAATCTAAATAAAAGTCCTTGTGCAAAACCGCCAGGCGTACATAGGGAACAAAGGGTA  
ACACTACAAGAGCTCCCGGTAAACATATGCAATAAACAGGCAAGAACAAACGTGTATTCA  
GTACCAGACAGCGGCTATGGCAATATGGAAGTGGAACAGCTGAAGTGGAGGTAAGTGT  
GTAAATAATACAAATGGGGAAGAGGAAGGGGAAAATGGCGGGGAAAATGGCGGCAGCATA  
CGGGAGGAGTGCAGTAGTGTAGACAGTGCTATTGATAGTGAGAATCAAGATCCACAGTCA  
CCTACTGCACAGCTAAAAACAGTATTACAGGCTAATAACCAAAAAGCCATACTACTATCA  
CAATTTAAACACACATATGGATTAGCATTTAACGACCTGGTACGTACATTTAAAAGTGAT  
AAAACCATATGTAAGTACTGAGTGGGTAGCAGCAATATGTGGAGTAAATCCCACCATAGCAGAA  
GGCTTTAAAACACTAATTCAGCCATATGCGTTATATACACATATACAGTGTTTGGATACC  
AAATATGGAGTGTATATACTACTATTAATTAGATATAAATGTGGAAAAAACAGGATAACA  
GTAGGCAAAGGATTAAAGTAAATTATTACATGTGCCAGAAAGTTGTATGCTAATTGAACCA  
CCTAAATTGCGTAGCCCTGTTGCAGCACTGTATTGGTATAGAACTGGAATGTCTAATATA  
AGTGAAGTGTGAGTACTACGCCAGAATGGATACAGCGATTAAACAGTAATACAGCATGGA  
ATAGATGACAGTGTATTTGACCTGTCTGATATGGTACAATGGGCATTTGATAATGATGTA  
ACAGAAGACAGTGACATAGCATATGGATATGCATTATTAGCAGATAGTAATAGTAATGCT  
GCAGCATTTTAAAAAGTAAGTACGCGGCAAAATATGTACGCGACTGTGCTACAATGTGC  
AGCATTATAAAAGGGCACAAAAAACAAATGACTATGGCGCAATGGATTAGGTTTAGA  
TGTGATAAATGTGACGATGGGGGCGACTGGCGACCAATAGTGAATTTCTAAGGTATCAA  
GGGGTAGAATTTATAACCTTTTTTGTGTGCATTTAAGGAGTTTTTTAAAGGGCACCCCAAAG  
AAAAATTGCATAGTAATACAGGGACCACCAAAACACAGGCAAGTCATACTTTTGTATGAGT  
TTAATGCACTTTTTTACAAGGTACAGTAATTTTCATATGTAAATTCCACTAGTCATTTTTGG  
TTAGAGCCACTTGCAGATGCAAAGGTAGCAATGTTGGATGATGCCACAGGCACATGCTGG  
TCATATTTTCGATACGTATATGAGAAATGCATTAGATGGAAATCCTATAAGCCTTGACAGA



AAACATAGACATTTTAATACAAATTAAGTGTCCACCCATATTAATAACATCCAATACCAAT  
CCTGTAGAGGAAAATAGGTGGCCATACCTAACTAGCAGACTAACAGTGTTTACATTTTCCT  
AATGCATTCCCATTTGACCAAAACAGGAATCCAGTGTACACAATCAATAATAAAAACTGG  
AAAAGTTTTTTCCAAAAGACTTGGTGCAAATTAGACTTGCAGCAGGACGAGGATGAAGGA  
GACAATGATGGAAACACTATCCCAACGTTTAAATGCGTTACAGGAGAAAATACTAGAACA  
TTATGAACAGGACAGTAACTAATATATGATCAAATCAATTATTGGAAATATGTGCGACT  
GGAAAATGCAATATTTTATGCAGCACGGGAACGTGGCATGCATACTATAGACCACCAGGT  
GGTGCCACCAGGCACTACTTCAAAAAGCAAAAAGCATATCAAGCTATTGAACTGCAGATGGC  
CCTAGAGAGCCTTGCACAAACTGACTTTAATAAAGAGGAGTGGACATTAAAGGACACAAG  
TAATGAAATGTGGCAGACAAAGCCAAAACAATGTTTTAAAAAAAAGGTGTTACAGTGGA  
GGTGTGGTACGATGGAAACAAGGACAATTCTATGCATTATGTAGTGTGGGGAGCAATATA  
TTATAAAACACATACAGACACGTGGTGTAACAGAGGGTATGTGGATTACTGGGGTAT  
ATATTATGTGCACGAGCAGCATAAGACATATTATGAAGTGTTTAAAGCAGGATGCACAAAT  
GTATGGGACTAGCGGAAAATGGGAAGTGCATTGTAATGGCAACATAATTCATTGTCCTGA  
CTCTATGTACAGTACCAGTGACGACACAGTACCCACTACTGAGCTTACTGCAGAACTACA  
ACACACCACCCCGGCCCATACCGCCGCAACAACCCCATGCACCAAAAAAACTAAGTCGGC  
GCCGTCTTGCAAGTGTGGAGTCTCCAGACCCCTCAGAAACAGACGGAGTGTCGTGGACCT  
TGTTACAAGTAAAGGCTGCAACAAACGACGGCACCAGTGTTGTGGTGACACTACACCTAT  
AGTGCATTTAAAGGTGACAAAAATGGTTTAAAGTGTCTTAGGTATCGATTGCGAAAATT  
TAATTCATTGTATGAAAATTTTCATGTACTTGGCATTGGATAGGGGGCAAGGGAAGTAA  
ACATACAGGTATACCTAAGTGAACATATACTACTGAAGCACAACGCCAAAAATTTTTGGA  
AACTGTTAGAAATCCACCTAGTGTACATGTATCTGTGGGATATATGACATTGTAACAGCA  
CATGCTGTATGTATATTGTATACATATCAATGATTGCATTGGTGTTTTTGGTGTGGTTTG  
CTGTATGCTTATATATATGTTGCAGTGTCCCGCTTTTGCCGTCTGTGCATTTGTGTGCGT  
ATATGTGGCTACTTTTTATTTGTGTTTATTGTTGTACATACCACACCATTGCAAATGTTTT  
GTATATATTTACTATTTTTTATATTGCCATATGTGGTTTTTACACATCCTTTCAGTATATG  
CTTAAGTTGTGTTGCTGCATAGTGTATTGTACATTACTTGTTTTTACATTTATATTGTAC  
CAATAAACATGGTTTTCTAGCCGTGCGTCCAGGCGTAAGCGTGCATCTGCAACAGACATAT  
ATAAAACCTGCAAGCAATCAGGCACATGTCCGCCTGATGTTGTTAATAAGGTGGAGGGTA  
CCACACTGGCTGATAGTTTTTACAATGGGCTAGTTTAGGTATTTTTTTGGGTGGTTTTGG  
GAATCGGTACGGGTACTGGTACTGGGGGCCGCACAGGGTACATTCCCTTGGGGGGTAGGC  
CTAGTACAGTTGTAGATGTTACCCCTGCACGTCCCTCCTGTGGTTATAGAACCTGTAGGAC  
CTACAGAACCTTCTATTGTTTCAGTTGGTAGAGGAATCTAGTGTTGTTTCCTCTGGTACAC  
CCATCCCTACTTTTACAGGCACATCTGGGTTTGAAATTACATCTTCTGCAACCACAACAC  
CTGCTGTATTAGATATTACCCCTGCTTCTGGGTCTGTTCAAATTAGTACCCTAGTTATA  
CCAATCCTGCATTTGCTGATCCATCGTTAATTGAGGTTCCACAAACAGGTGAGGTGTCAG  
GCAATATATTTGTTACTACTCCAACATCTGGAACACATGGATATGAAGAAATTCCTATGC  
AGGTTTTTGCCTCACATGGAACAGGCACAGAACCTATTAGTAGTACTCCTGTTTCCTGGTG  
TTAGTCGTGTGGCAGGCCCACGTTTATATAGTAGGGCCTATCATCAGGTTTCGTGTTAATA  
ATTTTGATTTTGTAAACCGCCCTTCATCTTTTGTAACATTTGACAATCCAGCTTTTGAGC  
CTGGTGATACATCCTTAACATTTGAACCTGCTGACACAGCTCCTGATCCAGATTTTCTGG  
ACATTGTTTCGTTTACATCGGCCTGCTTTAACCTCACGACGCGGAACAGTACGCTTTAGTA  
GGCTTGGTAAAAAGGCCACAATGTTTACCCGGCGGGGTACACAAATTGGGGCACAGGTTTC  
ATTATTATCATGATATTAGTAACATTACTGCAACAGAAGACATTGAGATGCAACCTTTAC  
TTACCTCTGAATCTACAGATGGTTTATATGATATATATGCAGATGCAGATATAGATAATG  
CAATGTTACATACTACTTCTCATACAGGTTCTACAGGACCTAGGTCCCATCTTTCATTTTC  
CTTCTATACCTTCTACAGTGTCTACAAAATATAGTAATACAACCATTCCATTTACTACTT  
CTTGGGACATACCTGTAAACACTGGCCCTGACATAGTTTTTACCTACTGCATCCCCCAATT  
TGCCCTTTGTCCCTCCTACATCTATAGATACCACAGTTGCAATAGCCATTGAGGGCTCCA  
ATTATTATTATTATGCTTTATTATATTATTTTCTAAAGAAACGTAAACGTATTCCCTATT  
TTTTTACAGATGGCTTTGTGGCGGTCTAGTGACAACACGGTGTATTTGCCACCCCTTCT  
GTGGCGAAAGGTTGTCAATACAGATGATTATGTAACACGTACAGGCATATATTATTATGCT  
GGAAGCTCTCGCTTATTAACAGTAGGGCATCCTTATTTTAAAGGTACCTGTAAATGGTGGC  
CGCAAGCAGGAAATACCTAAGGTGTCTGCATATCAGTATAGGGTATTTAGGGTATCCCTA  
CCTGATCCTAATAAGTTTGGCCTTCCGGATCCTTCCCTTTATAATCCTGACACACAACGC

CTGGTATGGGCCTGTATAGGTGTGGAAATTGGTAGAGGCCAGCCATTGGGCGTTGGCGTT  
AGTGGACATCCTTTATATAATAGATTGGATGATACTGAAAATTCTCATTTTTCCTCTGCT  
GTTAGTACACAGGACAGTAGGGACAATGTGTCTGTGGACTATAAGCAAACACAGTTATGT  
ATTATAGGCTGTGTTCCCTGCTATGGGAGAGCACTGGGCTAAGGGCAAGGCCTGTAAGTCC  
ACTCAACAGGGCGATTGTCCACCATTAGAATTAGTTAATACTGCAATTGAGGATGGCGAT  
ATGATAGATACAGGCTATGGTGCCATGGACTTTTCGTACATTGCAGGAAACCAAAAGTGAG  
GTACCACTAGATATTTGCCAATCCGTGTGTAAATATCCTGATTATTTGCAGATGTCTGCT  
GATGTATATGGGGACAGTATGTTTTTTTTGTTTGCAGCAAGGAACAGTTGTTTGCCAGGCAC  
TTTTGGAATAGAGGTGGCATGGTGGGCGACACAATACCTTCAGAGTTATATATTAAAGGC  
ACGGATATACGTGAGCGTCTCTGGTACTCATGTATATTTCCCTTCCCCAAGTGGCTCTATG  
GTCTCTTCTGATTCCCAGTTGTTTAATAAGCCCTATTGGTTGCATAAGGCCCAGGGACAC  
AATAATGGCATTTGTTGGCATAACCAGTTGTTTATTACTGTGGTGGACACTACACGTAGT  
ACTAATTTTACATTGTCTGCCTGCACCGAAACGGCCATACCTGCTGTATATAGCCCTACA  
AAGTTTAAGGAATATACTAGGCATGTGGAGGAATATGATTTACAATTTATATTTCAATTG  
TGTACTATCACATTAACCTGCTGACGTTATGGCCTACATCCATACTATGAATCCTGCAATT  
TTGGACAATTGGAATATAGGAGTTACCCCTCCACCATCTGCAAGCTTGGTGGACACGTAT  
AGGTATTTACAATCAGCAGCTATAGCATGTCAAAGGATGCTCCTACACCTGAAAAAAG  
GATCCCTATGACGATTTAAATTTTGAATGTTGATTTAAAGGAAAAGTTTAGTACAGAA  
CTAGATCAGTTTCCCTTTGGGCGCAAATTTTACTACAGGTAGGGGCTCGCAGACGTCCT  
ACTATAGGCCCTCGCAAACGCCCTGCGTCAGCTAAATCGTCTTCCCTAGCCCTCTAAACAC  
AAACGGAAACGTGTGTCCAAGTAATGTATGTATGTTGTATGCTGTGTATTTGTACTAT  
TACATATTTGTGTTTTTATGTTGTATGCTTGCACACTGTTTACATATTTGTGTTTGTATG  
TTGTATGCTTGCACACTGTACTGTATATGTTTGTCTTGGTACATATTTGTGGTTGTATGT  
GTATATGTTGCGTGCTATGTGTATGTTTTAGAAGTATGTGTGTATGTATGTTTTTGTAA  
TAAAGTATGTATGGAGGTTTCATTTGTGGTTGCACCCTGTGACTAAGGTGTTGTCCCTGT  
TTTACATATAATAGGAGTGTGATTACCAACATTTCCCTACATAATTTTATGCCCTACCCTA  
AGGTGTGTGTATACCATTTGTAGTTTATACATTTATATTTTATAGTGGGTTACCTGTATA  
CAGCAACGGCCATTTTGTGTGAAACCGTTTTTCGGTTGCATTTGGCTTTGTACCATCAGTT  
ACCCTTATAAACCTTTTGTATCAGCAAAAACATGTCCTGTAACCTAAGTTCACCTACATA  
CTTGGCACTACTAACAGTTTTAGTGGCGCACCTACACTTAGTCATCATCCTGTCCAGGTG  
CACTACAACAATGCTTTGGCAACCTTATGCACCTCCACCCTGTCTAATAAAGTGCTTTTA  
GGCATGTATTTTACCTGTTTTTACTTACCTAAGAGCATAGTTGGCCTGTATAACAGCTTT  
TACATCCAAGAATGTGTCGTTTTGGTGCAAGTTATATTTTGTGACTAATATTTTACAGAC  
CTGTGTGCAACCGAAATAGGTTGGGCAGACATTCCTATACTTTTA

>gi|333074|gb|M12737.1|PPH8CG\_Human\_papillomavirus\_type\_8,\_complete\_genome

AACGGTAAGTTTCATCAGTGTAACAGGTGCGGTATGAAAATTTCTTAATCATAAGTTGTT  
ATTGCCAACCAACCATCGTCTATAGCATGTTTTTGCCTGTATCGTTTTCGATCACACCATA  
TTGTATATTAATAATAATAATAATATATATATATATTGTTACAATGCTGTGACTTGTGC  
AATTTTCCCTAAGCAAATGGACGGGCAGGACAAGGCTTCATATTTAGACACTAATAAGGAC  
GAGCTACCCCTCTACTATTAAAGAGTTAGCTGCGGCTTTAGGTATTCCATTGCAGGACTGT  
TCAGTACCGTGCAACTTTTGTGGTAACTTTTGGATTTCTTAGAACTGTGTGAGTTTGAC  
AAAAAGAGACTGTGCCTAATTTGGA AAAATACGTTGTTACTGCGTGTGTGCTTGTGTTGT  
TGTGTAGCAACCGCAACGTTTGAATTTAATGAATATTATGAGCAAACTGTGCTAGGCAGA  
GATATTGAATTAGCTACAGGACGTTCAATTTTGGATAGACGTTAGGTGTCAAACTGC  
TTGTCAATTTTGGATATCATAGAGAAATTAGATTGCTGTGGGAGAGGCCGTCCCTTTTCAT  
AAAGTTAGAGGAGGCTGGAAAGGAGTTTGCAGGCTTTGTAAGCATTGTATCATGATTGG  
TAAAGAGGTCAGTGTGCAAGATTTTGTGTTGAAGTTAAGTGAGATACAACCTGAAGTGTT  
ACCAGTTGACCTGCTTTGTGAAGAGGAATTACCAAACGAACAGGAAACGAGGAGGAGCT  
AGACATCGAAAGAATGTATTTCAAATTTGTTGACCCGTGTGGCTGCAGCTGCTGTGAGGT  
CAAGCTACGTCCTTTTTGTCAACGCAACTGATTCGGGTATCAGGACCTTTCAAGAATTGCT  
GTTTCAGAGACCTACAGCTTCTGTGTCCTGAGTGCCGCGGTAAGTGC AAACATGGCGGATC  
ATAAAGGTAGTACATCTAAAGAAGGGTTAAGTGAGTGGTGTATTTTGAAGCTGAATGTA  
GTGATGTAGACAATGATTTTGAACAATTATTTGAGCGAGATACAGACTCAGATATTTTCGG  
ACTTATTAGATAATTGTGACCTGGATCAGGGAAATTCTCTGGAACATTTTCATCAACAGG  
AGTGTGAGCAGAGCGAGGAGCAATTACAAAAACTAAAACGAAAGTATCTTAGTCCTAAAG

CTGTCGCGCAGCTCAGTCCGCGGCTCCAGTCAATATCACTGTCACCTCAGCAGAAATCCA  
AGCGAAGGCTCTTTGCAGAGCAGGACAGCGGAGTCGAGCTAACTCTTAACAATGAAGCTG  
AAGATGTTTCTCATGAGGTGGAGGTACCGGCTATAGACTCTCGGCCGGAAGATGAGGGAG  
GATCAGGGGCTTTAGATATTGACTATACAGCATTGTTGCGGTCCAGCAACACAAAGGCCA  
CATTAATGGCAAAATTTAAAGAGGCATTTGGGGATGGCTTTAATGAACATAACACGCCAAT  
TTAAAAGTTACAAAACCTTGCTGTAACATATTGGGTTGTAGCTGCTTATGCAGTGCATGATG  
TATATGAAAGCTCAAAGCAGTTATTGCAACAGCATTGTGATTATATTTGGGTTAGAAGTA  
TAGCTGCAATTACATTATATCTATTGTCTTTTAAGGCGGGAAAAAATCGCGGTACTGTGC  
ATAAACTAATGACCTCAATGCTAAATGTGCAAGAGCAGCAGATATTGTCTGAGCCTCCTA  
AATTGAGACACACTGCTGCTGCTTTGTTTTGGTATAAAGGAGGAATGGGGACAGGAACAT  
TCACGTATGGTTCATACCCTGATTGGATTGCACATCAAACAATTCTTGGCCATCAAAGTG  
CTGAAGCAAGCACCTTTGATTTTTCTGTAATGGTACAATGGGCATTTGATAATAATCATT  
TTGAGGAGGCCGACATTGCTTATGGATATGCAAACTAGCCCCAGAAGATGCTAATGCTG  
TAGCCTGGCTTGCTCATAATAGCCAAGCTAAATTTGTAAGAGAGTGTGCAGCAATGGTTC  
GATTTTACAAAAGGGGGCAAATGAGAGAAATGACCATGTCTGAGTGGATATATACAAGGA  
TCAATGAGGTTGAAGGAGAGGGGCATTGGTCTTCATAGTAAAATTTGTAAGGTACCAGG  
GTATAAATTTTATTACATTTTTAGCTGCCTTAAAAGATTTTTTGCATTCCGTACCTAAGC  
GAAACTGTTTGTTAATCTATGGTCCACCTAATACTGGGAAATCTACATTTGCTATGTCAT  
TATACAGGTGCTGAAGGTAGAGTATTATCATATGTAAATTCAAAAGCCAATTTTTGGT  
TACAACCTCTTGGTAGACTGTAAAATAGCACTGTTAGATGATGTGACAGACCCCTGCTGGC  
TGTACATGGATACATTTCTGCGAAATGGATTAGATGGGCATGTTGTGTCATTAGATTGTA  
AATATAAAGCACCATGCAAATTAATTTCCCTCCCCTTTTGTTAACTTCCAATATTAACC  
TGCATGAGGAGGCTAACTATAGATATTTACATAGCAGAGTCAGAGGATTTGAATTTCCAA  
ATCCTTTTCCAATGAAACCAGACAATACACCTGAATTTGAATTAACCTGACCAAAGCTGGA  
AATCTTTTTTTGCAAGGCTTTGGACACAATTAGAGCTGAGTGATCAAGAAGACGAGGGCG  
AACATGGAGAATCTCAGCGAGCGTTTCAATGTTCTGCAAGATCAGCTAATGAACATTTAT  
GAAGCTGCAGAACAAACACTTGAGGCACAGATTGCGCATTGGCTGCTTTTGCGAAAAGAA  
GCTGTGTTGCTATATTTTCGCTAGGCAAAAAGGCATCACCAGGATTGGATATCAACCTGTG  
CCGCCACTAGCAGTGTCTGAAGCAAAAGCCAAGCAGGCTATAGGAATAATGTTGCAGCTG  
CAGTCACTACAGAAATCTGAGTTTGCAGATGAGCCTTGAGCATTAGTGGACACAAGTATA  
GAGACTTATAAGAATGCTCCAGAAAATCATTTTAAAAAAGGCGCCACACCTGTGGAGGTG  
ATATATGATAAACAGCCTGACAATGCCAATGTATACACTATGTGGAAGCACATTTACTAC  
ACTGATGCAGACGATAAGTGGCACAAAACCACAGTGGGGTTAACCAGACTGGCATATAC  
TATATGCAAGGCAGCTTCAGACATTATTATGTTGTGTTTGCTGATGATGCACGTAGATAT  
AGTGCTACTGGAGAATGGGAAGTAAAAATTAATAAGGACACTGTGTTTGCTCCTGTTACC  
AGCTCCACCCCCCGGATCACCACCAGGACAAGCAGACACAGACACCGCCGCAAGACC  
CCCACCACCTCCGCTGACTCCACGTCCAGACAGCAGCGGTCCCCTGCAAAACAGCCACAA  
CAAACCGAAACCAAAGGACGAAGGTACGGGAGACGGCCGTCCAGCAGAACAAAGACCGCAA  
AAAGAGCAGAGGCGATCAAGGTGCGGACACCGCACCAGGTCTCGCTCCCGGTCGCTCTCC  
CGGGTTAGGGCCGTTGGCTCCACCACCGTATCCAGGTCCAGGTCTCGCTCGCTCACCAG  
GCAGTTTCGGCCCCGTCCAGATCGCGATCCAGAGGACGGGCTACAGCCACCTCTAGGCGA  
AGGGCAGGTCGAGGGTCACCCAGGCGACGGCGATCAACCTCAAGGTACCCCTCCACCAAC  
ACCTTCAAACGGTCACAAAGGGGAGGAGGGAGACGGGGAAGAGGAAGGGGCAGTAGGGGG  
AGACGGGAACGATCATCTCCACCTCCCCACCCCCACCAAACGTTCAAGAGGGGAGTCT  
TCTAGGTTGCGTGGGGTCTCTCCTTCTGAAGTGGGAAGATCAGTTCAATCTGTTAGTGCA  
AAACATACAGGGCGACTTGGAAGACTACTGGACGAAGCTATCGACCCCCAGTAATATTG  
GTTTCGAGGGGAGGCAAACACATTAAAATGCTTTCGCAACAGAGCTAGAGTTAGATATAGA  
GGACTGTTCAAATACTTTAGCACCCACGTGGTCATGGGTGGCCGGCGATAGCACTGAGCGT  
CTAGGCAGGTCCAGAATCATCTGTTTACTTTCAGCTGGCCAAAGAAAGGACTTTTGAT  
GAGACTGTGAAATACCCGAAGGGAGTTGATACATCTTATGGTAACCTGGACAGTCTATAA  
CATTACTAACGCTGCCTTGCTACTAACACACTAACATATTCCCATTTGCTTTTTACTATA  
TTTTTTAATTTGTATACTGCTATGGCGCGTGCTAGACGGGTCAAGAGAGACTCTGTCACAC  
ACATTTATCAAACCTGCAAACAGGCAGGTACATGCCCCCTGATGTTATTAATAAAGTTG  
AGCAAACAACAGTTGCTGACAATATTTTAAAATATGGCAGTGCTGGTGTATTTTTTGGAG  
GCCTTGGTATAGGTACCGGCCGTGGTACAGGGGGTGTACTGGGTACACGCCATTAAGTG

AGGGGCCTGGTATCCGTGTTGGAAATACTCCCACAGTGGTACGGCCCTCACTTGTTCAG  
AAGCGGTAGGTCTTATGGACATACTGCCAATCGACACTATTGACCCTGTAGAGCCTTCAG  
TCTCCTCTGTGGTGCCACTCACTGAATCTTCAGGAGCCGACCTACTTCCAGGGGAAGTTG  
AGACAATTGCTGAAATTCACCCTGTACCTGAAGGCCCCACCATTGATTCACCTGTGGTGA  
CGACAAGCAAAGGTCAGTGCCATTTTAGAGGTGGCTCCTGAGCCAACCCCTCCTACCC  
GTGTCAGAGTTTCACGTACACAATATCACAACCCCTTCTTTTCAAATCATAACTGATTCCA  
CACCTACACAAGGAGAAAGTTCTCTAGCAGACCACATTTTAGTGACTTCTGGCTCTGGAG  
GCCAGACTATAGGTAGTGACATAACAGATGTCATAGAAGTCAAGAATTTTCCTAGTAGGT  
ATTCATTTGAGATTGATGAACCTACACCACCACGGCAAAGTAGCACACCTATTGAGAGAC  
CTCAAGTAGTGTGGTAGACGTAGAGGTATTTCTTTAAACAAATAGACGACTGATACAGCAGG  
TGGCTGTTGAGGATCCTTTGTTTTTATCAAAACCTTCCAAATTAGTAAGGTTCAAGTTTGTG  
ATAATCCTGTATTTGAAGAGGAGGTCACTAATATATTTGAGCAAGATGTGGACATGGTCG  
AGGAGCCTCCAGATAGAGATTTTCTTGATGTTCCGGCAGCTAGGGCGCCCAATACTCTA  
CTACACCAGCTGGCTATGTCAGAGTTAGCAGGTTAGGCACACGTGGCACCATTTCGCACAC  
GTTCTGGTGCAAAATTGGGTTCGAGGTACATTTTTACAGGGATTTAAGTTCAATCAATA  
CAGAAGATCCTATAGAAGTCCAACCTATTAGGTCAACATTCTGGGGATTCTACAATAGTAC  
AGGGTCTCTGTGAAAGCACATTTTGTAAATGTTGATATTTCTGAAAATCCTTTATCTGAAA  
GTATTCAAGCATTTTTCAGATGATTTACTACTGGATGAAACTGTAGAGGATTTTAGTGGGT  
CCCAATGGTAATAGGTAATAGAAGAAGTACAACCTTCTTATACTGTTCTTAGATTTGAAA  
CAACAAGAAGTGGCTCTTATTATGTGCAAGACACTAAAGGTTATTATGTGGCTTATCCTG  
AAAGTCGCAATAATGAGGAAATAATTTACCCTACACCTGATCTTCGGGTGGTAATAATCC  
ACACACATGATAACAGTGGTGACTTCTTCTTACATCCTAGCCTTCGCAGACGCAAACGTA  
AAAGAAAATATTTGTGATTTTGCATTACAGATGGCAGTGTGGCAATCGGCTACCGGTAAG  
GTTTATCTGCCTCCTTCAACACCAGTGGCCAGGGTGCAAAGCACGGATGAATACATTCAA  
AGAATAACATCTACTATCACGCCAATACTGACAGACTGCTCACTGTAGGACATCCATAT  
TTCAATGTTTACAACAATAATGGTGACACATTACAGGTTCCCAAAGTATCGGGAAATCAA  
CACAGGGTCTTTCGCTTAAAGTTACCAGATCCAAATAGGTTTGCAGTGGCAGATATGTCT  
GTATACAATCCAGACAAAGAAAGGTTGGTATGGGCTTGCAGAGGCTTAGAAATCAGTAGG  
GGACAACCATTAGGTGTTGGGAGCACCGGCCATCCCTATTTTAAATAAAGTGAAAGACACT  
GAAAACAGCAATTCATACACCACAACATCTACAGATGACAGACAAAATACTTCCTTTGAT  
CCTAAGCAAATACAAATGTTTATTGTGGGTTGCACACCCTGCATTGGTGAGCATTGGGAA  
AAAGCCATTCCATGTGCAGAGGACCAACAGCAAGGTCTGTGCCCACCCATTGAACTAAAA  
AATACAGTTATTGAAGATGGGGACATGGCAGATATTGGTTTTGGTAATATGAACTTTAAG  
ACTTTACAACAGAACAGATCTGATGTAAGTCTCGACATAGTAAATGAGATATGCAAATAT  
CCTGATTTTTTTGAAAATGCAGAATGATGTGTATGGTGATGCCTGTTTCTTTTATGCACGA  
AGGGAACAGTGCTATGCTAGACATTTTTTTTGTGAGAGGGGGTAAGACAGGTGATGACATA  
CCTGCTGCTCAAATTGATGATGGCATGATGAAAAATCAATATTACATTCTGCTGGTGACAA  
GATCAATCACAAAAGGATATAGGTAATGCTATGTATTTCCCAACCGTCAGTGGCTCACTT  
GTTTCAAGTGATGCTCAATTGTTTAAACAGGCCTTTCTGGCTGCAGCGTGCCAGGGTCAT  
AATAATGGCATTCTCTGGGCTAATCAAATGTTTGTCACTGTGGTAGACAACACGCGAAAC  
ACCAATTTTAGTATTTTCACTGAAAATGGGGAACCTAAGAACATCACAGACTAT  
AAATCAACCCAGTTCAGAGAATATCTGAGACATGTAGAAGAATATGAAAATTTCCCTCATA  
TTACAATTGTGTAAGATACCACTAAAGGCTGATGTTTTAGCACAAATCAATGCCATGAAT  
TCATCACTACTTGAGGAATGGCAACTGGGATTTGTACCTACCCCTGATACTCCAATTTCAT  
GACACCTACAGATATATTGATTCTCTTGCCACACGTTGTCCTGATAAAAGTCCCCCTAAG  
GAAAAGCCTGATCCATATGCAAAGTTTAACTTCTGGAATGTGGACCTTACAGAACGACTT  
TCCCTGGATTTGGATCAATATTCATTAGGCAGGAAGTTCTTGTTTCAAGCAGGTTTGCAA  
CAGACGACCGTAAATGGTACAAAATCTATATCTAGGGGCTCCGTCAGGGGCACAAAACGA  
AAACGGAAAAATTAGATTGTACCGTTTTTCGGTACAAAACATAAACTTTTACACAGTATT  
CAAGGAATGTTTGTATTCTGACTCAGCATCTACCTAAGAAACCGACCGCACCCG  
GTACATAAAGGTGAGTAGTTGCCAAAACAGACTCAGTTTAGTGCCAGAATAGACCATGTT  
CGTTCAAACATGCTCGGATTAGGTGCGCTGCCAAGGAAGTATTGATCTTGCCAATCTATT  
TTGGCAGCGCTTTTGGCATCTCCAACGGACCGTT

>gi|1020290|gb|U31794.1|HPU31794\_Human\_papillomavirus\_type\_66,\_complete\_genome  
GAAAGTTTCAATCATACTTTATTATATTGGGAGTAACCGAAATGGGTTTAGGACCGAAAA

CGGTACATATAAAAGGCAGCCTGTTGTGCCTGTAGATATCCATGGATTCCATATTCAGCA  
ATACACAGGAACGTCCACGAAGCCTGCACCATCTGAGCGAGGTATTACAAATACCTTTAC  
TTGATCTTAGATTATCATGTGTATACTGCAAAAAGGAACTTACAAGTTTAGAGCTATATA  
GGTTTGCATGTATTGAGTTAAACTAGTATATAGAAACAATTGGCCATATGCAGTATGTA  
GGGTATGTTTATTGTTTTATAGTAAGGTTAGAAAATATAGGTACTATAAATATTCAGTGT  
ATGGGGCAACATTAGAAAGTATAACTAAAAACAGTTATCTGATTTATCAATAAGGTGCT  
ACCGATGTCAATGTCCGTTAACACCGGAGGAAAAACAATTGCACTGTGAACATAAAAGAC  
GATTTTCATTATATAGCATATGCATGGACCGGGTCATGTTTGCAGTGTGGAGACATACGA  
GTAGACAAGCTACAGAATCTACAGTATAACCATGCATGGTAAAGTACCAACGTTGCAAGA  
GGTTATATTAGAACTTGCACCGCAAACGGAAATTGACCTACAATGCAATGAGCAATTGGA  
CAGCTCAGAGGATGAGGATGAGGATGAAATAGACCATTTGCTGGAGCGGCCACAGCAAGC  
TAGACAAGCTGAACAACATAAGTGTACCTAATTCACGTACCTTGTGTAAAGTGTGAGTT  
GGTGGTGCAGTTGGACATTCAGAGTACCAAAGAGGAGCTACGTGTGGTACAACAGCTGCT  
TATGGGTGCGTTAACAGTAACGTGCCCCTCTGCGCATCATCTAAATAACTGCAATGGCA  
TCACCTGAAGGTACAGATGGGGAGGGGATGGGATGTTGTGGATGGTTTCAGGTAGAAGCA  
ATTGTAGAAAAGAAAAACGGGGGATACAATATCAGATGATGAAAGCGAGGAGGAGAATGAA  
ACAGATACAGATGTAGATGGATTTATAGACAATACACTTATAAACAATACACAGGAAGAC  
AGGGAGACAGCTCAACAATTATTGCAAGTACAAACAGCACATGCAGATGCACAGACGTTG  
CAAAAACTAAAACGAAAGTATATAGGTAGTCCCTTAAGTGATATTAGTAATCAGCAAAC  
GTGTACCGGAGGAAAGTAAAACGAAGGCTAATATTATCAGAAGACAGCGGGTATGGCAAT  
ACATTGGAAACATTGGAAACATCACAACAGGTAGAATACGAAAAGGGAAATGGGTGCGGG  
AGCTCACAAAAATGGAGGCTCGCAAAACAGTAATTGTAGTGAGCACTCGGTATCAAATATG  
GATATAGATACAAATATGGAAACACCAACACACCAATTGCAGGAACTATTTAAAAGTAGT  
AACGTACAAGGAAGATTACATTTTTAAATTTAAAGAAGTGTATGGAGTGCCATATACAGAG  
TTGGTGCGAACATTTAAAAGCGATAGTACATGTTGTAACGATTGGATATGTGCAATATTT  
GGCGTTAATGAAACATTAGCAGAGGCGTTAAAACTATACTAAAACCACAATGTGTGTAC  
TATCATATGCAATGCTTAACATGTTTCATGGGGAGTAATTGTAATGATGCTAATTAGATAT  
ATATGTGGAAAAAATAGAAAAACAATTACAAAATCGCTAAGCTCAATTTTAAATGTACCA  
CAAGAGCAAATGTTAATTC AACCCACCAAACTACGAAGTCCTGCTGTAGCATTATATTTT  
TATAAAACAGCAATGTCAAATATTAGTGAGGTGTATGGGGAAACACCAGAATGGATACAA  
AGACAGACACAATTGCAACACAGTTTACAAGACAATCAATTTGAATTGTCTAAAATGGTA  
CAGTGGGCATTTGATAATGAAGTAACAGATGATAGCCAAATTGCCTTTTTATATGCACAA  
CTAGCAGACATAGATAGCAATGCACAAGCATTTTTTAAAAGTAATATGCAAGCAAAATAT  
GTAAAGGATTGTGGAATAATGTGTAGACATTACAAAAGGGCACAGCAACAGCAAATGAAT  
ATGTGCCAGTGGATAAAGCATATATGTAGTAAAGTAGATGAAGGGGGTGATTGGAAACCC  
ATTGTGCAATTTTTTACGATATCAAGGGGTCGACTTCATTTTCATTTTTTAAGTTATTTTTAA  
TTATTTTTTACAAGGAACGCCTAAACATAATTGTTTGGTACTGTGTGGACCACCAAATACA  
GGTAAATCATGTTTTTGCTATGAGCCTTATAAATTTTTTCCAAGGGTCAGTCATTTTCATTT  
GTTAATTCACAAAGCCACTTTTTGGTTACAGCCACTAGACAATGCCAAATTAGGTTTGCTG  
GATGATGCAACAGATACGTGTTGGAGATACATAGATGATTATCTAAGAAATTTATTAGAT  
GGGAATCCCATAAGTTTAGATAGGAAACATAAACAATTAGTACAAATAAAATGTCCTCCA  
GTTATTATTACAACATAATGTAAATCCTATGCAAGATGCAAAATTAAGATATTTACACAGT  
AGAATTTCAGTGTTTTAAGTTTGGAAATCCATTTCCATTAGATAACAATGGTAATCCTGTG  
TATGAATTAAGTAATGTAAATTGGAAATGTTTTTTTGAAGGACATGGTCCAGATTAAAT  
TTGGATAACGACGAGGACAAAGAAAACAATGGAGACTCTATCCCAACGTTTAGATGCGTG  
CCAGAACAAAATACTAGACTGTTATGAAAAAGATAGTAAATGCATTATAGATCACATAGA  
CTATTGGAAAGCTGTACGACATGAATATGTATTATATTATAAAGCAAGAGAAAATGACAT  
TAATGTACTAAACCACCAGATGGTGCCCTCTTTACAAGTGTGTAAAGCAAAAGCATGTAG  
TGCAATAGAATTACAAATAGCACTGGAAGCAATAAGTAACACAATATATAAAAAATGAAGA  
GTGGACATTACGTGATACATGTGATGAACCTGTGGCGCACGGAGCCTAAAAACTGTTTTAA  
AAAAGAAGGACAACACATAGAAGTGTGGTTTGATGGTAACAAAAATAATTGTATGGAATA  
TGTGGTGTGGAAATTTATATATTATAATGGAGAGTGTGGGTGGTGTAAAGTGTATCAGG  
GGTGGATTACAGAGGCATATATTATATGCATGATGGCCACAAAACATATTACACAGACTT  
TGAACAGGAGGCCAAAAAATATGGGTGTACAAACATATGGGAAGTACATATGGAAACCGA  
GAGTATTTACTGTCCTGACTCTGTGTCTAGTACCTGTAGATACAACGTACCCCCCTGTTGA

GACTGTTAACGAATACAACAACCACAGGACCACCACCACCGCCTCCACCTTTGTGGGCGC  
CCAAGACGCCGCGGTATCCCACAGACCAGGAAAACGACCCAGAGCAAGTGAATCAGAACC  
TGACTCCTCCAGAGAGTCCTACGCACACTGTGTCAACAGACACAGACATCAGTAACAA  
CGCCAACAGTAGAAGTCCACGTATCAACACACAAAGCCACTGTGGTGATAAAACTACGCC  
TGTAATCCATTTAAAAGGTGAAGCTAATAGATTAAAGTGTTGTAGATACAGATTTCAAAA  
ATATAAAACATTATTTACAGATGTAACAACAACATATCATTGGACAAGTACAGATAATAA  
AGACAGTAGTATTATTACAATATTATATAAAGATGAAACACAACGGGACACCTTTTTTAAA  
TGTTGTAAAAATACCACCTAGTGTACAGGTTATTTTGGGACAAATGAGTTGTCCATAAAG  
TGTTGTATATATTGTATATACATATGTGTTATTGTAACACTGGTACAGGTGAAGTGTAAAT  
TGCCATACATTGCTGCTAAGCATATATATTGCACCCATTAATTGTATTTGGTATATTATG  
TGTTATTGTAACACTGGGAAAGGTAACGTGTAATCGCCATATATTGCAACCATTGATTTT  
TGTGTAATTTGTGTGTTTGCCTTTTGTGTTTGTCTGTGTGTGTGCCATTTTGTCTC  
CCGCTTTTGTCTATCTGCATCTTTATTTACAAGTTGTCTTATACTAATTATTTTATTTTGG  
TTTGTGTGGCTACATCATTTTTTGTACTTTTATACTGTTTTTACTATTTTTTTATATA  
CCTACACTGTGTATATATTGCCATGCTTTGTGGTTAATAAACCATTTGTAACAGTAGTAA  
TTTTTGTACTATGGTTGCCCACCGTGCCACACGACGCAAACGCGCATCTGCCACACAAT  
TATATAAAACATGCAAATTATCTGGTACATGTCTGAGGATGTTATTAATAAGGTGGAGC  
AAAAAACATGGGCTGATAGGATTTTACAATGGGGAAGTTTATTTACATATTTTGGGGGGC  
TTGGCATTGGTACTGGGTCTGGGTCTGGGTGGTTCGGGCGGGCTATGTTCCCTTAGGCTCTA  
GGCCTTCTACTATAGTTGATGTCACCTCTGCACGACCACCTATTGTGGTGGAGTCAGTTG  
GGCCTACAGATCCTTCTATTGTTACACTGGTAGAAGAATCTAGTGTTATTAACTCAGGGG  
CTGGTGTTCCCAATTTTACTGGGTGAGGGGATTTGAAGTTACATCCTCTTCCACAACCA  
CACCTGCTGTGTTGGATATTACACCCACATCTAGTACTGTACATGTAAGTAGTACTACTA  
TAACAAAACCACTATATATTGATCCTCCAGTAATTGAGGCTCCACAAAACCTGGAGAGGTAT  
CTGGTAATATTTTGTATTAGCACTCCTACATCTGGAATACATAGCTATGAGGAAATACCTA  
TGCAAAACATTTGCTATACACGGTACTGGCAACGAACCTATTAGTAGTACCCCTATTCCAG  
GTTTTAGACGCCCTTGCTGCTCCCAGGTTATATAGTAGGGCTTTTACAGCAGGTTAGGGTCA  
CTGACCCAGCATTTTTTGGACAACCCCAACATTAATATCTGCTGATAATCCTGTTTTTTG  
AAGGTGCTGACACAACGTTGACCTTTTCTCCCTCGGGTGTGGCTCCTGATCCTGATTTTA  
TGGATATAGTTGCATTACATAGGCCTGCATTTACTACACGTAGAACAGGTGTGCGTTTTTA  
GTAGGCTAGGCAAAAAGGCTACCATGCAAAACACGTAGGGGTACGCAAATAGGTGCTCGTG  
TGCATTATTATTATGATATAAGTCCTATTGCACAGGCTGATGAAATTGAAATGCAGCCAT  
TATTGTCTACAGACAATTCATTTGATGGCCTATATGATATTTATGCAAATATTGATGATG  
AGGCACCCATTTTCATTTCTGTCAGTCTGGTGCTACACCTTCTGCACAATTACCTATTAAAC  
CTTCTACATTATCCTTTGCTAGTAACACAGCTAATGTTACTGCCCCCTTTGGGAAATGTTT  
GGGAAACACCATTTTTATTTCAGGTCCTGATATAGTTTTTACCTACAGGCCCCAGTACTTGGC  
CCTTCGTACCTCAGTCTCCTTCTGATGTTACACATGATGTATATATACAGGGAGCTACAT  
TTGCACTATGGCCTGTATATTTTTTTTAAACGTAGGCGCCGTAAACGTATTCCCTATTTTT  
TTGCAGATGGCGATGTGGCGGCCTAGTGACAATAAGGTGTACCTACCTCCAACACCTGTT  
TCAAAGGTTGTGGCAACGGATACATATGTAACCGTACCAGTATATTTTATCATGCAGGT  
AGCTCTAGGTTGCTTGCTGTTGGCCATCCTTATTACTCTGTTTCCAAATCTGGTACCAA  
ACAAACATCCCTAAAGTTAGTGCATATCAGTATAGAGTGTTTAGGGTACGGTTGCCTGAT  
CCTAATAAGTTTGGCCTTCCTGATCCATCTTTCTATAATCCTGACCAGGAACGTTTGGTA  
TGGGCCTGTGTAGGTTTGGAGGTAGGCCGAGGTCAACCTTTAGGTGCTGGGTAAAGTGGT  
CATCCATTATTTAATAGGCTGGATGACACTGAGGTCTCTAATTTAGCAGGTAATAATGTT  
ATAGAAGATAGCCGGGACAATATATCTGTTGATTGTAAACAAACCCAGTTATGTATTGTG  
GGATGTGCACCAGCATTTAGGGGAACATTGGACTAAGGGCGCGGTGTGTAAGTCTACACCA  
GGTAATACAGGGGATTGTCACCTCTTGCAATTAGTTAATACCCCGATAGAGGACGGTGAC  
ATGGTGGACACCGGGTTTGGTGCAATGGCACTTTAAGCTATTACAGGAATCAAAGGCTGAG  
GTGCCATTGGACATTGTACAATCTACATGTAATAATATCCTGATTATTTAAAAATGTCTGCA  
GATGCCTATGGGGATTCTATGTGGTTTTACTTACGCAGGGAACAATTGTTTGCCAGACAT  
TACTTTAATAGGGCAGGTAATGTTGGGGAAGCCATTCCCTACAGATTTGTATTGGAAGGGT  
GGCAATGGCAGGGACCCTCCTCCCAGTTCTGTATATGTTGCTACTCCTAGTGGGTCCATG  
ATTACCTCTGAGGCCCAATTATTTAATAAACCTTATTGGTTGCAACGTGCACAGGGCCAT  
AATAATGGCATATGCTGGGGTAATCAGGTATTTGTTACTGTTGTGGATACTACCAGAAGC

ACCAACATGACTATTAATGCAGCTAAAAGCACATTAACATAATATGATGCCCGTGAAATC  
AATCAATACCTTCGCCATGTGGAGGAATATGAACACAGTTTGTGTTTCAACTTTGTAAA  
ATAACCTTAACCTGCAGAAGTTATGGCATATTTGCATAATATGAATAATACTTTATTAGAC  
GATTGGAATATTGGCTTATCCCCACCAGTTGCAACTAGCTTAGAGGATAAATATAGGTAT  
ATTAAGAGCACAGCTATTACATGTGAGAGGGAACAGCCCCCTGCAGAAAAGCAGGATCCC  
CTGGCTAAATATAAGTTTTGGGAAGTTAATTTACAGGACAGCTTTTCTGCAGACCTGGAT  
CAGTTTCCCTTTGGGTAGAAAATTTTAAATGCAACTAGGCCCTAGACCCCTAGACCCAAG  
GCTAGTGTATCTGCCTCTAAAAGGCGGGCGGCTCCTACCTCTTCTCTTCTTCCACCAGCT  
AAACGTAAAAAACGATAGTTGTGTGTTGTGTGTTGTATGTATTGTATGGTTGTGCTTGTA  
CTGTATGTTTTTGTGTATGTTTATGTATTTTATAATTGTGTATGTGCTATGTGTATGTAT  
GACTGTATGTATGTGAATGTTTTGTGTGTATGTAATAAACATGCATGGTTACTTTTACG  
CGTGGTTGCATAAACTAAGGTGCGGTAGTATCCTTGGGCAGTGTGTGTCAGGTTAGGTGG  
TGTTCCCTTACTGTTTAAATGTTATATTAATAAGGTTGTTTGTATGCACTATAGTAACACAC  
CAAACCTCCATTTTAGTGCTGTACGCCATTTTATGCATGCAACCGAATTCGGTTGCCTAGC  
CTTTTGTCCCTATTTAAACCCAAAACGACTTTTTCAGCAAAACAGTTAATCCTTTGGCATA  
TTGCCGTTTCCCTGTTGTATGATTACAGGTATGTACACTGCCTTACCCTGTATTACTCACCT  
GTATTTCTGTGCCAACTATGCTTTTATCTGCATACTTTGGCGCTGTTGGGCATATGTTTT  
TATGCAGGTGTTTGCATATATTTTGTGGCGTGTAGCCCTTATTGTATAAGCCAAGTAT  
CTGTCTTGCAAAATATGTAACCATATACTTACTCATTTTACAAAACCGTTTACGGTCTGTC  
TAAACAGGTTTCTTTTAAATTGTT

>gi|1020266|gb|U31791.1|HPU31791\_Human\_papillomavirus\_type\_55,\_complete\_genome  
TAATAATAATGTAAGCTTTAGAAAAGAGGAGGGACCGAATTCGGTTCCAACCGAAAACGG  
TTATATAAAAAACCAGCCCCAAAATTAAGCAAGCGGGGCATAATGGAAAAGTGCAAATGCCT  
CCACGGCTGCACAAAGTATAGACCAGTTGTGCAAGGAGTGCAACATTCCATATGCACCATT  
TGCAAATTTTATGCGTGTTTTGCAGAAAAACCTTGACCACTGCAGAGGTTTATTCATTCTG  
CATATAAACAGTTATATGTAGTGTTTCGAGGTAACTTTCCATTTGCAGCCTGTGCCATTT  
GTTTAGAACTACAAGGTAAGGTCAATCAATTTAGGCATTTTGACTTCGCGGGATATGCAT  
TAACAGTGGAAGAAGAGACAAAGCAGTCAATTTTGGACGTGTTTATACGCTGTTATTTGT  
GCCACAAACCATTGTGCCACGTGGAAAAGGTGCGCCACATATTGGAGAAGGCGCGATTTA  
TTAAATTACAGAATACCTGGAAGGGTCGCTGCTTCCATTGCTGGACATCATGCATGGAAA  
CTATCCTACCTTGAAGGAAATTGTTTTAGAGCTGGATCCTCCTGACCCTGTAGGCCTACA  
TTGCAATGAGCAATTAGACAGCTCAGAGGATGAGGTGGATGAACTAGCCACGCAGGCCAC  
GCAAGACGTTACACAGCCTTACCAAATAGTAACCACCTGTGGTACATGTAACCGGAACGT  
TCGGCTGGTTGTGCAAGTGCACAGGAACAGACATCTGTCAACTACATACGCTTCTGCTGGG  
TTCCTGGAATACTGTGTCCTGTGTGTGCGCCCAAAACTAACAACGATGGCAGACAAT  
ACAGGTACAGAGGGGACGGGGTGCTCAGGATGGTTCTTAGTAGAGGCTATAGTGGAGAAA  
ACAACCTGGGCAACAAATATCTGAGGATGAGGATGAGGCAGTGGACGATAGTGGGTTGGAT  
ATGGTGGACTTTATAGATGACAGGCCTATTACACACAATTCCATGGAAGCACAGGCATTG  
TTAAACGAGCAGGAGGCGGATGCTCATTATGCGGCTGTGCAGGACCTAAAACGAAAGTAT  
TTAGGTAGTCCATATGTGAGTCCTTTAAGCAATATTAAGGAGGCAGTGGAGTGTGACATT  
AGCCCACGGTTGGATGCCATAAAATTAAGTAGACAACCCAAAAAGGTAAAGCGGCGGCTG  
TTTGAAAAGACCAGAAATTAACGGACAGTGGATATGGCAATATTGATGTGGAAGCTGAAACG  
CAGGTAGAGAGAAATGGCGAACCAGGAAGATTGTGGGGGAGGTGGACAAGGAAGGGACACA  
GAGGAGGGGGTGGAACAGGTGGAAACGGAAGTGCAGACACATAGCGACACACAGCTGCAC  
ACCGAGACCACGCGGTAGTAGAACTGTTAAAATGTAAGAATATACGGGCTACACTGCTT  
GGTAAGTTTAAGGACTGTTATGGGTTATCATATACAGATTTAATTAGACAATTTAAAAGT  
GACAAGACAACATGTGGGGACTGGGTGATTGCAGCATTGTTGGGGTGCACCATAGTGTATCG  
GAGGCGTTTCAAAATTTAATACAACCAGTAACAACATATAGCCACATACAATGGCTTACA  
AATGCAATGGGGAATGATATTACTGGCATTATTACGGTTTAAAGGTAAATAAAAAACAGATGT  
ACAGTGGCAGCAGTATGGCAACACGTTTAAATATACCTGAGGATCATATGTTAATTGAA  
CCTCCTAAAAATACAAAGCGGTGTTGCAGCATTATATTGGTTTAGAAGTAGTATATCCAAT  
GCCAGTATAGTTACTGGAGAAACGCCTGAATGGATAACAAGGCAAACCATTTGTAGAACAT  
GGGCTTGGTGACAACCAATTCAAATTAACAGAAATGGTGCAATGGGCATATGATAATGAC  
TTTTGTGAGGAAAGTGAAATTGCATTTGAATATGCACAACGTGCAGATATAGATGCAAAT  
GCAAGAGCATTTTAAATAGTAATTGTCAGGCAAAATATGTAAAAGATTGTGCTACAATG

TGCAAGCACTATAAACTGCAGAAATGAAAAAATGAGTATGAAACAGTGGATAAAATTT  
AGGAGCAGTAAATATGAAGAAACAGGCAATTGGAAACCAATAGTTCAATTTTAAAGATAT  
CAAAATATTGAATTCATTCCATTTTAACTAAATTGAAAATGTGGCTGCATGGGACACCT  
AAAAAAACTGTATTGCAATTGTAGGACCACCAGACACAGGGAAATCGTGTTCGTATG  
AGTTTAATTAAATTTTTAGGAGGCACTGTAATTAGTTATGTAACTCTAGTAGTCACTTT  
TGGCTACAGCCCCATGCAATGCAAAAGTAGCATTGTTAGACGATGTAACACAATCGTGC  
TGGGTATATATGGATACATACATGAGAAACCTATTAGATGGAAACCTATGACTATTGAC  
AGAAAACACAAATCATTAGCATTAATAAAATGTCCGCCATTAATAGTAACATCTAACATA  
GACATTACTAAAGAAGATAAATATAAAATATTTATGTAGCAGGGTAACATTATTTACATTT  
CCAAATCCATTCCCCTTTGACAGAAATGGGAATGCACTATATGACCTGTGTGAATCAAAC  
TGGAAATGTTTCTTTGCAAGATTATCAACAAGTCTAGATATACAAACATCTGAGGACGAG  
GACGATGGAGACAATAGCCAAGCATTTAGATGTGTGCCAGGAACAGTTGTTAGAACTGTA  
TGAAGAAAATAGTAATAACCTTACAAAACATATACAACATTGGAAATGCATAAGATATGA  
ATGTGTGTTATTACACAAAGCAAAGCAAATGGGCCCTAAACCACATTGGAATGCAAGTGGT  
GCCAGCATTAACAGTGTACAGACAAAGGGACACCAGGCCATTGAAATGCAAATGACATT  
AGAAACACTATTAACTCTGACTATGGTATGGAACCATGGACATTGCAAGACACAAGTCG  
TGAAATGTGGTTAACAGCACCCAAATACTGTTTTAAAAAACAGGGACAACTGTGGAAGT  
AAAATATGACTGCAATGCAGACAACATTATGGAGTATGTATCGTGAAATATATTTATGT  
GCTGACACAGACAAATGGGTAAAAGTGACAGGACACATAGACTATAAAGGGTTGTATTA  
TGTATGCGGGCATAAAACCTATTATACCAATTTTGAAAAGAGGGCTAAAAAATATGG  
GAACTCATTAACAATGGGAGGTCTGTATTGTTAGCAGTGTATATGTTCTCTGCATCTAT  
ATCTAGTACTGTGAAGACGTATCCATTGCTGGGCCTGCTTCACACACCTCCTCCTCCAC  
CACCACCACCTTGACAGGCCTCACCTGCACTGCCCACCTGCACCTCCGAGGAACGCGT  
GGACCCGCCGCCATGTAAACGACCCCGAGGACCCACCACAAACACCAACAACGCCAGGGA  
CACCGTCAGTGTCCGACACAGCGACTCCGTGGACAGTACAAACAACAACATCTACCCTAA  
CAGTTACAACAGTAACAAAGGACGGGACAACAATTTTTGTACAGCTACGCCCTGTAGTTCA  
ATTACAAGGTGATCCTAATTGTTTTAAAGTGTTTAAAGATATAGATTACATGCAAAGCATAA  
AACATTGTTGTAGCAGCATCGTCCACATGGCGCTGGACATGTTTACAGATACTTCCAGTAA  
ACATGCACTGGTAACATTAAACATATGTTAATGAAGAGCAACGTGAGCAGTTTTTAAACAC  
TGTACGGTTACCTCCAACAGTTACATATAAAGTTGGATATATGTCTTTACAATTGTTATA  
ATGCTTATTGTATATATTTAATTGTATAAATGTACATGGAACATATACCTATAGATGGT  
ACTATAGGGGCAACCAGCACATCATTACTGCCAGTTGTACTTGCCCTGTTTGTATGTTTT  
GTTAGCATTTGTATTAATTATTTACATTTCTGATTTTATAGTGTACACATCTATATTGGTA  
CTAACCTTACTGCTATATATGTTACTTTGGCTTTTACTAACCCTGCCCCTGCAATTTTAT  
GTACTAACACTGTGTGTCTGCTTTTTTCTGCGTGGTATCTACATTTCTATATTGTACAT  
ACACAAGAATAACTATTACAATGCTAACATGTACCTTTGATGATGGTGATACATGGTTGT  
TATTATGGTTTTATATTAACCTTAATTGTTACCATTGTGGCATTGTTATTAATGCACTTTA  
AATCTGTACCATGTGTTACATGCAGTAAATAAGTGTGTTGTAAACGTGGTGTGGTTGGTAT  
AATTATGGCACACAGCAGGGCACGTAGACGTAAACGTGCCTCAGCTACCCAATTATATCA  
AACCTGTAAGGCTGCAGGCACCTGTCCATCTGATATTATTCCTAAAGTTGAACATAACAC  
TATTGCTGATCAAATATTAAAGTGGGGCAGTTGGGTGTTTTTTTTGGAGGACTGGGAAT  
TGGTACAGGCTCTGGCACAGGTGGTGAACAGGATATATTCCTTTGCAATCTACCCACG  
TCCTGAGATTCCCTCTGGCCCTACCACAAGGCCACCTATACTTGTTGATACAGTTGCACC  
TGGTGACCCCTCTATTGTTTCTTTGGTTGAAGAATCTGCTATTATAAATTCAGGAGCTCC  
GGAATTGGTCCCTCCGTCCCATGGTGGCTTTGAGATTACTACATCAGAATCCACCACACC  
AGCCATATTAGATGTGTCTGTTACAACACATACTACCTCTACAAGTGTATTTAGAAACCC  
TAGCTTTGCAGACCCATCTGTTGTACAGTCCCAGCCAGCCGTTGAAGCTGGTGGACACAT  
ACTTATCTCTACCTCAACCATATCGTCCCACCCGTGTAGAGGAAATACCATTAGATACATT  
TATAGTATCTTCTTCAGATAGTAATCCATCTAGCACTCCCATCCAGCATCTGGTGC  
ACGACCAGTATTGGCCTATACAGTAAGGCTTTACACCAGGTACAGGTAACGGATCCCGC  
CTTTTTGTCTCTCCCAACGCCTTATAACATTTGATAATCCTGCATATGAAGGGGAAGA  
TGTTAGTTTTGGAGTTTGCACACAATACTATACATCAGCCTCCAGATGATGCGTTTTATGGA  
TATTATACGATTGCACAGACCAGCTATACAATCTCGGCGTGGTCGTGTGCGGTTTTAGTAG  
AATAGGACAACGGGGGTCTATGTACACACGTAGTGGTAAACATATTGGTGGCAGGATACA  
TTTCTATCAAGACATATCTCCTATATCTGCTGCTGCAGAAGAAATAGAACTGCACCCTCT



TGTGGCCACTGCACACGATACTAGCCTGTTTGATATTTATGCAGAACCTGACCCTGACTT  
TACAGAAGAACCTGTTCCATTGTCTTTTTCCACCTCCACGCCCTTTCAGCGGTCTTCTGT  
GTCAGCCACCCCATGGGGCAATACTACTGTCCCTCTTTCATTACCTGGTGACATGTTTGT  
ACAGCCTGGTCCTGACATAATATTTCTACTGCATCCACTACAACCTCCCTATAGTCCTGT  
CACTCCTGCTTTACCTACAGGTCTGTTTTTATAAGTGGTGCTACATTTTATTTATATCC  
TGCATGGTATTTTGCACGCAAACGCCGTAAACGTGTTTCCTTGTTTTTGCAGATGTGGC  
GGCCTAGTGAAAACCAGGTATATGTGCCTCCTCCCGCCCCAGTATCCAAAGTAATAACTA  
CGGATGCCTATGTCAAACGCACCAACATAGTTTACCATGCTAGCAGTTCTAGACTTCTTG  
CTGTAGGCAACCCCTTATTTTTGCCATACGACCAGCAAACAAGACACTTGTGCCTAAAGTTT  
CAGGATTTCAATATAGGGTTTTTAAAGGTGGTATTGCCAGACCCTAATAAAATTTGCATTAC  
CTGACACATCTATATATGACCCTACTACGCAACGCCTGGTATGGGCCTGCATTGGGTGG  
AAGTGGGTAGAGGCCAGCCCCTGGGTGTTGGTATTAGTGGGCATCCATTATTAACAAAT  
TGGATGATGTGGAATTTCTGCTAGTTATGCAGCCAGTCCAGGTGAGGACAACAGGGTAA  
ATGTGGCCATGGACTATAAACAAACACAATTATGTTTAGTTGGCTGTGCACCCCCATTGG  
GGGAGCATTGGGGTAAGGGCAAGCCATGTAATAATGGTAGTGTAATAGCGGAGACTGCC  
CTCCCCTGGAATTAATTACTAGTGTTATCGAAGATGGTGATATGGTGGACACTGGTTTTG  
GAGCCATGAATTTTCGCTGAATTGCAACCAAATAAATCTGATGTTCCCTTAGATATATGCA  
CTGCTACATGCAAATATCTGACTATTTACAAATGGCTGCTGATCCATATGGGGACAGAT  
TGTTTTTTTACTTACGAAAGGAACAAATGTTTGCAAGACATTTTTTTAATAGGGCGGGAA  
CGGTTGGAGAGGACATCCACAGGATTTGGTTTTTAAAGGTGCTACTAAAAGTACAGTTC  
CTAATGCCATATACTTTTAATACACCCAGTGGGTCTCTTGATCTTCTGAAACCCAATTAT  
TTAATAAGCCTTTTTGGTTGCAAGGGCGCAGGGCCACAATAATGGTATTTGTTGGGGGA  
ATCAGTTATTTGTTACTGTTGTAGATACTACACGTAGTACAAACATGACAATATGTGCTG  
CTACAACCTCAGTCTCCATCTACAACATATAATAGTACAGAATATAAAACAATACATGCGAC  
ATGTTGAGGAGTTTGACTTACAGTTTATGTTTCAATTATGTAGTATTACCTTAACTGCTG  
AGGTAATGGCCTATTTACATACCATGAATCCTGGTATTTTGGAAACAGTGGAACTTTGGGT  
TGTCGCCACCCCCAAATGGTACCTTAGAAGACAAATACAGATATGTGCAGTCACAGGCCA  
TTACATGTCAAAAGCCTCCCCCTGAAAAGGCAAAGCAGGACCCCTATGCAAAATTAAGTT  
TTTGGGAGGTAGATCTCAGAGAAAAGTTTTCTAGTGAGTTAGATCAATATCCCCTTGGTA  
GGAAATTTTTATTGCAAACGGGTGTGCAGGCCCGGTCTCTGTTTCGTGTGGGTAGAAAAC  
GTCCTGCATCTGCAGCCACTTCATCCTCCAGTAAACCCAAACGGTCTAGGAAGAAGTAGT  
ATGTGTTATTGTTTTGTTTGTGTATGTGTGTCATATGTTATTGTTTGTATATGTGTTGT  
ATTGTATATATGTTGTATGTCTATGTTGTGTAATGTTGTATGTATGCATGTGTGTGTTGT  
ATTTAATAAACTTAATCTGTGTGTCTGTTCCACCCCATGAGTAAGTGTTGTAGTATTGT  
GTGTTATGTCTGGTGTATACAATATACAACATATGTACAGCCATGTTGTTTTATAAAACA  
CATTTTTTAAACATATTCCTCCATTTTGGGTGCAACCGTTTTTCGGTTGTTACTCATCACC  
ACATCCTGTAACCAATTTGTTGTAGCAAGCAAAATATTTAATCTTATCTATAGTTGCCAA  
AACTTTACTATGTTACTAAGTACACACCTGGCGCACAGCTAGGCGCGGTTTGGCAACTAC  
ACAATACATTCCTAATCTATATAACACTGCTGTCTACTTGTTTAAACAATCGTGTGCTGGT  
AGCCAACTTTTAAAAGCATTTTTGGCTACTAACACTACATTTTTGTACAGTTACTGTTAG  
TTTTATAAAATGAGTAACCTAAGGTACACACCTGCAACCGGTATCGGTTGAAACACACC  
CTGTACATTTCCCTTATTATAGT

>gi|1020242|gb|U31788.1|HPU31788\_HumanPapillomavirus\_type\_44,\_complete\_genome

TTAATAATAATCTAACCTTTACAAAAAAGAGGAGGAACCGAATTCGGTTCCAACCGAAAA  
CGGTTATATAAAAACCAGCCCAAAAATTAAGCAAGCGGGGCATAATGGAAAGTGCAAATG  
CCTCCACGTCTGCACAAAGTATAGACCAGTTGTGCAAGGAGTGCAACATTCCTATGCACA  
ATCTGCAAATTTTATGCGTGTTTTGCAGAAAAACGTTAAGTACTGCAGAGGTTTATTCAT  
TCGCATATAAACAGTTATATGTAGTGTACCGAGGAAACTTTCCATTTGCAGCCTGTGCCA  
TTTGTTTAGAATCAAGGTAAAGTCAATTTAGGCAATTTAAGTACGCGGGATATG  
CAGTAACAGTGAAGAAGAAGAAACAATAAGTCAATTTCTGGACGTGCTGATACGCTGCTATT  
TGTGCCACAAACCATTTGTGCCACGTGGAAAAAGGTGCGCCACATATTGGACAAGGCGCGAT  
TCATTAAATTACAAGATACCTGGAAGGGTCGCTGCTTCCATTGTTGGACATCATGCATGG  
AACTATACTACCTTAAAGGAAATTGTTTTACAGCTGGAACCTCCTGACCCTGTAGGCCT  
ACATTGCAATGAGCAATTAGACAGCTCAGAAGATGAGGTGGATGAACTAGCCACGCAAGC  
CACGCAAGACGTTACACAGCCTTACCAAATAGTAACCACCTGTGGTACATGTAGTCGGAA

GGTTCGGCTGGTTGTGCAGTGCACAGGAACAGACATCCATCACCTACATACGCTTCTGCT  
GGGTTCACCTGGATATATTGTGTCTGTGTGTGCGCCCAAAACCTAACAACGATGGCTGAC  
AATACAGGTACAGAGGGAACGGGATGCTCAGGATGGTTTCTAGTAGAGGCTATAGTGGAG  
AACACAACCGGGCAACAAATATCAGAGGATGAGGATGAGGCAGTGGAGGATAGTGGGTTG  
GATATGGTGGACTTTTATAGATGACAGGCCTATTACACACAATTCCATGGAAGCACAGGCA  
TTGTTAAACGAGCAGGAGGCGGATGCTCATTATGCGGCTGTGCAGGACCTAAAACGAAAG  
TATTTAGGTAGTCCATATGTTAGTCCTTTAAGTAATATTGAGCAGGCAGTGGAGTGTGAC  
ATTAGCCCACGGCTGGACGCTATAACATTAAGTAGACAACCAAAAAAAGTAAAGCGACGG  
CTGTTTGACAGACCAGAATTAACGGACAGTGGATATGGCAATACTGAAGTGGAAGCTGAA  
ACGAGGTAGAGAGAAATGGCGAACCGGAAGATTGTGGGGGAGGTGGACAAGGAAGGGAC  
ACAGAGGGGGTGGAACAGGTGGAAACCGGAAGTGCAGACACATAGCAACACACAACAGCAC  
ACCGGGACCACGCGGGTACTAGAACTATTGAAATGTAAGAATATAAGGGCTACACTGCTT  
GGTAAGTTTAAAGGATTGCTATGGGTATCATATACAGATTTAATTAGACAATTTAAAAGT  
GACAAGACAACATGTGGGGACTGGGTAATTGCAGCCTTTGGGGTGCACCATAGTGTGTCA  
GAGGCGTTTCAAAATTTAATACAGCCAGTAACAACATATAGCCACATACAATGGCTTACA  
AATGCATGGGGAATGGTCTTACTGGCATTAGTAAGGTTTAAAGTAAATAAAAAACAGATGT  
ACAGTGGCACGTATGATGGCAACCCGTTTAAATATACCTGAGGACCACATGTTAATTGAA  
CCTCCTAAAATACAAAGCGGTGTTGCAGCGTTATATTGGTTTAGAAGTGGTATATCCAAT  
GCCAGTATAGTAACCTGGAGAAACACCGGAATGGATAACAAGGCAAAACCATTTGTAGAACAT  
GGGCTTGCAGACAACCAATTTAAATTAGCAGACATGGTTCAATGGGCATATGATAATGAC  
TTTTGTGAGGAAAGTGAATTTGCATTTGAATATGCACAACGTGCAGATATAGATGCCAAT  
GCCAGAGCATTCCTAAATAGTAATTGTCAGGCAAAATATGTAAAAGACTGTGCCACAATG  
TGCAAGCACTATAAACTGCAGAAATGAAAAAATGAATATGAAACAGTGGATAAAATTT  
AGGAGCAGTAAATTTGAAGACACAGGAAATTGGAACCAATAGTGCAATTTTTTAAGACAC  
CAAAACATAGAATTTATTCGGTTTTTAACTAAATTAAGATGTGGCTGCATGGTACACCA  
AAAAAAAACGTATTGCAATAGTGGGCCACCAGACACAGGTAAATCGTGTTTTTGTATG  
AGTTTAATTAATTTCTTAGGAGGCACTGTAATTAGTTATGTAACTCCAGCAGTCACTTT  
TGGCTACAGCCCTTATGCAATGCAAAAGTAGCATTATTAGATGATGTAACCAATCCTGC  
TGGGTATATATGGATACATATATGAGAAACCTATTAGATGGAAACCTATGACCATTGAC  
AGAAAACACAAATCATTAGCATTAAATAAAATGTCCGCCTTTAATAGTAACATCAAACATA  
GACATTACTAAAGAAGAGAAATACAAATATTTATGTAGCAGGGTAACATTATTTACATTT  
CCAAATCCATTCCCCTTTGACAGAAATGGGAATGCACTATATGACCTGTGTGAAACAAAC  
TGGAAATGTTTCTTTGCAAGATTATCATCAAGTCTAGATATACAAACATCAGAGGACGAG  
GACGATGGAGACAATAGCCAAGCATTTAGATGTGTGCCAGGAACAGTTGTTAGAACTGTA  
TGAAGAAAATAGTAATAAACTTACAAAACATATACAACATTGGAAATGTATACGATATGA  
ATGTGTGTTACTACACAAAGCTAAGCAAATGGGCCTGAACCACATTGGAATGCAAGTGGT  
GCCAGCATTAGCAGTGTACAGACAAAGGGACACCAGGCAATTGAAATGCAAATGACATT  
AGAAACATTACTAACTCTGACTATGGTACGGAACCATGGACATTGCAAGAGACAAGTCG  
GGAAATGTGGTTAACACCACCCAAATATTGCTTTAAAAAGCAGGGACAACTGTGGAAGT  
AAAATTTGACTGCAATGCAGACAATGCAATGGAGTATGTATGGTGGAAAAGTCATTTATGT  
ATTTGACACAGACAAATGGGTAAAAGTGACAGGACACATAGACTATAAAAGGTTGTATTA  
TGTACATGGTGGGCATAAAACCTATTATACAAATTTTGAAAAGGAGGCCGAAAAATATGG  
GAACTCTTTACAATGGGAGGTATGTATTGGCAGCAGTATCATATGTTCTCCTGCATCTAT  
ATCTAGTACTGTGCAAGACGTATCCATTGCTGGGCCTGCTTCACACTCCTCCTCCTCCAC  
CACCACCACCTTGCACAGGCCTCATCCACACTGCCCATTTGGCACC GCCGAGGACTGCGT  
GGACGCGCCGCCATGTAAACGACCCCGAGGACCCCCACAAACACCAACAACGCCAGAAA  
CACCCTCTGTGTCAGAAACAGCGACTCCGTGGACAGTACAAACAACAACATCCTCCCTAA  
CAGTTACAACAGTAACAAAGGACGGGACAACAATTATTGTACAGCTACGCCTGTAGTTCA  
ATTACAAGGTGATGCTAATTGTTTAAAGTGTTTAAAGATATAGATTACATGCAAAGTATAA  
AACATTGTTTGTAGCAGCATCGTCCACATGGCGCTGGACATGTTTCAGATACATCCAGTAA  
TGCATTGGTAACTTAACATATGTTGATGAACAGCAACGCCAGCAGTTTTTTAAACACTGT  
AAAGTTACCACCAAAAGTTACATATAAAAGTTGGATATATGTCTTTACAATTGTTATAATG  
TGTGTTGTATATATCTAATTGTATATATTGTACATGGAACACATACCTATAGATGCTACT  
ATAGGGGCAACCAGCACATCATTACTGCCAGTTGTAATTGCCCTGTTTGTATGCTTTGTT  
AGCATTGTATTAATTATTTGTATTTCTGATTTTATAGTGACACATCTATATTGGTACTA

ACCTTACTGCTATATCTGTTACTTTGGCTTTTACTAACCTCTGCCCTGCAATTTTATTTA  
CTAACACTGTGTGTCTGCTTTTTTCTGCGTGGTATATACATTTCCATATTGTACATACA  
CAACAAGAATAACTATTACAATGCTAACATGTACGTTTGATGATGGTGATACATGGCTGT  
TATTGTGGTTGTTATTAACATTAATTGTTACCATTATAGCATTGTTATTAATGCATTTAA  
AACTGTACAATGCGTTACATGCAGTAAATAAGTATTTGTATATTTGGTGTGTATTGTAT  
AAATATGGCACACAGTAGGGCACGTAGACGTAAACGTGCATCTGCTACCCAATTATATCA  
AACATGTAAGGCTGCAGGCACCTGTCCCTCTGATATTATTCCCTAAGGTGGAACATAACAC  
TATTGCAGATCAGATATTAAGTGGGGCAGTTTGGGGGTTTTTTTTTGGGGGACTGGGGAT  
TGGTACAGGCTCTGGCACAGGCGGTAGAACAGGGTATATACCTTTACAATCCACCCCGCG  
TCCTGACATTCCCTCTGTACCTACCGCAAGGCCACCTATACTTGTGTAAGTGTGACACC  
TGGGGACCCGTCCTATTGTATCCTTGGTTGAAGAATCTGCTATTATAAAATTCGGGGGCCCC  
GGAATTGGTCCCTCCTTCCCATGCAGGATTTGAAATCACTACATCTGAATCTACCACACC  
AGCTATATTAGATGTGTCTGTACACACATACTACCTCTACAAGTGTATTTAAAAACCC  
TAGCTTTGCTGACCCATCTGTTGTACAGTCGCAGCCTGCTGTTGAAGCTGGTGGCCACAT  
ACTTATCTCTACCTCATCTATATCGTCCCACCCCTGTAGAAGAAATACCTTTGGATACATT  
TATAGTATCTTCCCTGATAGTAATCCTGCATCTAGCACTCCCATTCCAGCATCTGGTGC  
ACGGCCGCGTATTGGCCTATACAGTAAGGCTTTGCACCAGGTACAGGTAACGGATCCTGC  
CTTTTTGTCTCTCCCCAGCGCCTAATAACATTTGATAATCCTGCATATGAAGGGGAGGA  
TGTTACTTTACACTTTGCACACAATACTATACATGAACCTCCAGATGATGCGTTTATGGA  
TATTATACGATTGCACAGCCGCTATACAGTCCAGGCGTGGTTCGTGTCGCTTTAGTAG  
AATTGGACAACGAGGGTCTATGTACACACGTAGTGGCAAACATATTGGTGGCAGGATACA  
TTTCTATCAAGACATTTCTCCTATATCTGCTGCTGCAGAAGAAATAGAACTGCACCCCT  
TGTGGCCACTGCACAGGATAGTGGCCTGTTTGATATTTATGCAGAACCTGACCCCTGATGT  
TACAGAAGAACCTGTTTCATTGTCTTTTTTCTACCTCCACACCCTTTTACGCGGTCTTCTGT  
GTCAGCCACCCCATGGGGCAATACTACTGTCCCTCTTTCATTACCTGCTGACATGTTTGT  
ACAGCCTGGTCCTGACATAATCTTTCCTACTGCATCCACTACAACCTCCCTATAGTCCTGT  
CACTCCTGCTTTACCTACAGGTCTGTTTTTATAAGTGGTGTGCTGCATTTTATTTATATCC  
TACATGGTATTTTGCACGCAAACGCCGTAAACGTGTTTCCTTGTTTTTTGCAGATGTGGC  
GGCCTAGTGAAAACCAGGTATATGTGCCTCCTCCCGCCCCAGTATCCAAAGTAATACCTA  
CGGATGCCTATGTCAAACGCACCAACATATATTACCATGCTAGCAGTTCTAGACTTCTTG  
CTGTGGGCAACCCCTATTTTTGCCATACGACCAGCAAACAAGACACTTGTGCCTAAGGTTT  
CGGGATTTCAATATAGGGTTTTTAAGATGGTATTGCCAGACCCTAATAAAATTTGCCTTAC  
CTGACACATCTATATATGACCCCACTACGCAACGCCTGGTATGGGCCTGCATCGGGCTGG  
AGGTAGGTAGAGGACAGCCCTTAGGTGTTGGTATTAGTGGGCATCCATTATTAAATAAAT  
TGGATGATGTAGAAAATTCAGCTAGTTATGCAGCCGGTCCGGGTGAGGATAACAGGGTAA  
ATGTGGCCATGGACTATAAACAAACACAATTATGTTTGGTTGGCTGTGCACCCCGTTAG  
GTGAGCATTGGGGTAAAGGCAAGCAGTGTAATAATGTTAGTGTTAAGGATGGGGACTGCC  
CTCCCTTGGAATTAATTACTAGTGTAATTGAGGATGGTGATATGGTGGACACTGGTTTTG  
GAGCCATGAATTTTGCTGAATTGCAGCCAAATAAATCTGATGTTCCATTAGATATATGCA  
CTGCTACATGTAAATATCCTGACTATTTACAAATGGCTGCAGATCCATATGGGGACAGAT  
TGTTTTTTTTTACTTACGAAAGGAACAGATGTTTGCCAGACATTTTTTTTAAAGGGCTGGAA  
CAGTTGGTGAGGACGTTTCCCAGGATCTGGTTATTAAGTGTCTAGTAAAAATACTGTTT  
CTAATGCTATATACTTTAATACACCCAGTGGTTCTCTTGTATCTTCTGAAACCCAATTAT  
TTAATAAGCCTTTTTTGGTTGCAAAAGGCGCAGGGCCACAATAATGGTATTTGTTGGGGAA  
ATCAGTTATTTGTTACTGTTGTAGATACTACCCGTAGTACAAACATGACAATATGTGCTG  
CCACTACACAGTCCCCCTCCGTCTACATATACTAGTGAACAATATAAGCAATACATGCGAC  
ATGTTAGAGGAGTTTGACTTACAATTTATGTTTCAATTATGTAGTATTACCTTAACGGCGG  
AGGTAATGGCCTATCTTACATCTATGAATGCTGGTATTTTAGAACAGTGGAACCTTTGGGT  
TGTCGCGCCCCCCAAATGGTACCTTAGAGGACAAATACAGATATGTGCAGTCCCAGGCCA  
TTACATGTCAAAAGCCACCCCTGAAAAGGCAAAAGCAGGACCCCTATGCAAAATTAAGTT  
TTTTGGGAGGTGGATCTTAGAGAAAAGTTTTCTAGTGAGTTGGATCAATATCCCTTGGTA  
GAAAATTTTTTATTACAAACGGGTGTGCAGGCCCGTTTCTCTGTTTCGTGTGGGTAGGAAAC  
GTCCTGCGTCTGCAGCCACTTCCCTCCAGTAAACAAAAACGGTCTAGGAAGAAGTAGTATG  
TGTTATTGTTTTGTTTGTATGTGTGTCATATGTTATTGTGTTATATATGTGTTGTGTTGT  
ATATATGTTGTATGTGTATGTTGTGTAATGTTGTCTGTAATGGAATGCATGTGTGTGTTG

TACATAATAAACTTAATCTGTGTGTCTGTTCCACCCCATGAGTAAGTGTGTAGTGTG  
TGTTCTATGTTTGGTATATATAATATATAACATATGTACAGCCATGTTAGTTTTTAAACA  
TATTCCTCCATTTTGGGTGCAACCGTTTTTCGGTTGTTTATTTTGGGTGCAACCGTTTTCG  
GTTGTTACTCATTACCCACATCCTGTACCCAATTTGTTATAGCAAGCAAAATATTTAATC  
ATCTCTGCCAGAACTTTATTATGTTACTAAGTACACACCTGGCGCACAGCTAGGCGCGGT  
TTGGCAACTACACAATACATTCCCTAATCTCTATACTACTGCTGTCTCGTTTGTGAACAAT  
AGTGCGCTGGTAGCCAACTTTTTAAAAGCATTTTTGGCTACTAGCACTGCATTTTTGTAC  
AGTTACTGTTGGTTTTATAAAATGAGTAACCTAAGGTCACACACCTGCGACCGGTATCGG  
TTGACACACACCCCTGTACACTTCCTTATCATAG

>gi|1020234|gb|U31787.1|HPU31787\_Human\_papillomavirus\_type\_38,\_complete\_genome

CATCTTTGGCAGACGAAGTGCACCGATAACGGTAAGACTTTTCTCTTTTAACCGTAGGCG  
TTGGTTTATTATTCCTGGCAACAATGGTGGTTAACAACCATCACACGTAATCGGTACAAG  
CAACCGCTTGTGGTAGTAAAATGAATTAACCAAGGATATATTTAAGGGGCCT  
GTAAGCTTGGGATGTATTCATGGAACACCAAAACCTCAAACCTGTGCAGCAGCTCAGTGA  
TAAGTTAACAGTTCCTGTAGAGGATCTGTTATTACCCTGTAGATTCTGCAACAGTTTCCT  
CACGTACATTGAATTACGTGAGTTTGATTACAAGAACTTACAGTTAATCTGGACTCAAGA  
GGATTTTGTGTTTGCATGTTGTAGCAGTTGTGCTTATGCTTCTGCTCAATATGAATGTCA  
GCAGTTTTATGAATTAACATGTCTTTGGCCGTGAAATTGAACAGGTGGAGCAACAGACAAT  
AGGCCTTATTGTTATAAGGTGTCAGTATTGTTTAAAGTGTCTTGATTTGATAGAAAATT  
AGATATCTGTGCTCTCATCAAGCATTTCAACAAGGTTAGAGGCAATTGGAAAGGAAGGTG  
CAGGCATTGCAAAGCAATAGAATGATTGGGAAACAAGCTACTCTTCGTGATATAGTTCTT  
GAAGAGCTTGTCAGCCCATTGACCTGCATTGCCACGAGGAGTTGCCTGATCTTCCAGAG  
GATATTGAAGCATCAGTGGTAGAGGAGGAGCCAGCATAACCCCATACAAAATCATAGTT  
CTTTGTGGGGGTTGTGAAGTAAGGCTAAAACTATACGTGTGGGCCACCGACGCTGGGATT  
CGGAATCTGCAAGATTGTTTGTGCGGACGTAAGGCTTCTGTGTCCACCTGTCGAGAA  
GACATTTCGCAATGGCGGACGATAAAGGTACTGATCCTAAAGAAGGCTGTAGTGATTTTAT  
ATATTTAGAAGCTGAATGCTCTGACATTAGTGACTTAGATAATGATTTGGAAACATTATT  
GGAAGAAGGTGCGGGATCCGATATTTCTGACTTAATAAATGATGAGGTGTTGAGCAGGG  
AAATTTCCCGCAATTATTATGTCAACAAGAGAGAGAGAGAGCGAACTGCAGGTTCAATA  
TCTAAAACGAAAGTGTTTCAGTCCGAAAGCTGTTTCAGGAGCTTAGTCCTCGTCTGCAGTC  
TATGAATATATCTTCAGAGCATAAATCTAAAAGGAGATTATTTGTGGAGCAAGACAGTGG  
ACTGGAGCTATCTCTAAATGAAGCTGAAGATTCTACTCAAGAGTTGGAGGTACCGGCGAG  
CGCTCCAGCGCCGGCAGCAGAGGGTGATATAGGGCTGGGTACTGTAAGAGATCTTTTAAG  
GAGCAGTAACAGCAGAGCAACACTGTTAAGCAAATTTAAAGACTCGTTTGGGGTCAGCTT  
TACAGAAGTACAAGACAATATAAAAGCAATAAAACGTGTTGCCACCATTGGGTCTTGGC  
AGTGTATGCTGCTAAGGATGACTTGATAGATGCGTCCAAACAATTGTTACAGCAGCATTG  
TTTTTATATATGGCTTCAATCATTTTGTCCCATGTCACTTTATTTATGTTGCTTTAATGT  
TGGTAAAAGTAGAGACACTGTTGTAAGACTAATAGCTACATTATTACAGGTGCATGAAAA  
TCATATATTGTCAGAGCCACCAAAAAATAGAAGTATTCAGCAGCGTTATTTTGGTATAA  
AGGAAGTTTGAATAGTAATGTGTTTTGTTTTGGTGAAGCTCCTGATTGGATTCTATCACA  
AACAATGATACAGCATCAAACCTGCTGACACTTTGTCAGTTTGACTTGTCTCGAATGATTCA  
ATGGGCCTATGATAATGATCATATAGACGAAAGCATTATAGCTTATCAATATGCTAAATT  
AGCAGATATTGATAGTAATGCTAAAGCTTTTTTAGCTCATAACAGCCAAGTTAAATATGT  
TAAAGAGTGTGCTTTAATGGTAAGATATTATAAAAGAGGAGAGATGAAAGAAATGTCTAT  
TTCTGCTTGGATTTCATCACTGCATATCTAAAGTTGAAGGAGAAGGCAATTGGCAGCATAT  
TGTTAGGTTTATTAGATACCAAAATTTGAATTTTATTATGTTTCTAGATAAGTTTTCGGAC  
CTTTTTTAAAAAATCTGCCAAAAAATTTGTTTATTAAATATATGGTCCCTCCTGACACAGG  
AAAGTCTATGTTTGCATATGTCACTTATTAACTATTGAAAGGTAGTGTAGTATCTTTTGC  
TAATTCGAAAAGTCAATTTTGGTTACAGCCACTAGCTGATGGGAAAATTGGTTTATTGGA  
TGATGCAACTGATGTGTGTTGGCAGTATATAGATTCTTTTCTTAGAAATGGTTTAGATGG  
TAATTTAGTGTGCTTAGATATAAAACATAAAGCACCTTGTCAAATGAAATTTCCCTCCATT  
AATTATTACTTCCAATATTAATTTATTTAAAAGAGGAACGATACAGATTTTACACAGTAG  
AGTAACACAAAATTGATTTTCCAAATAAGTTTCCCTTTGACTCAGATAATAAGCCTTTGTT  
TGAACCTACTGATCAAAGCTGGGCATCTTTCTTTAAAAGGCTGTGGACACAATTAGAGCT  
CAGTGATCAAGAAGACGAGGGAGACAATGGAACTCTCAGCGCACGTTTCACTGTACTGC

AAGAGAAGTTAATGGACATATATGAATCAGGTGTAGAGGACCTGGATACACAAATTCAGC  
ATTGGCAGCTTTTAAGACAAGAGCAAATTATTTATCACTATGCAAGGAGACATGGTGTTA  
CTCGATTGGGCTATCAACCTGTACCTTCTTTGGCAAGTTCAGAAGCCAAAGCAAAAGATG  
CCATTTCTATGGTCCTTTTACTTGAAAGCCTGAAAAAATCCAAATATGCAGATGAACAAT  
GGACATTAGCTCAAACCTAGCCTGGAGGCTGTTTCGCAGCCCTCCTGCAGACTGTTTTAAAA  
AAGGACCTAAAAATATTGAAGTTGTATTTGATGGTGACCCTGAAAATCTTATGTCATATA  
CTGTGTGGACATATATATATTACCTGACAGATGAGGACATATGGGAAAAAGTGGAAGGCC  
ATGTGGATTATACAGGAGCCTATTATTATGAGGGCAAATTAAGGTGTATTATTTAAAAAT  
TTGAAAATGATGCTAAACGATATGGTGTCACAGGATTATGGGAAGTACATGTTAATAAAG  
ACACTGTGTTTACCCCCGTTACCAGTTCTACGCCGCCAGTTGGAGACTCCACCGACTCCG  
CATCCAGGGCGGCACTCCCCGAGCCTTCCACCTCCGTGTCCCCGAACGGCCACCATCCC  
AAACAGCACGGCGATACGGGAGAAAAGCATCTAGCCCTTCAACCACCTCCCCGAGGCAAA  
GGAAAGGACAAAGAGAAACCACAGGCACCCAAAGGAGAAGAAAAAGCAGATCAAGGTCCC  
GAAGCACCAACAGGGGAGGGAGGGACACCCGGCGATCCTCCTCCAGAGGATCCTCAGTCT  
CCCCACCAGGGGAAGGAGAAGGGGAGGAGGGGACAGCAGAAGGCGGGGGCCGGTCACCC  
GCTCGAGATCAAGATCCCTCTCACGAGCCTCTTCTGCAGGGGTGGCATATCGCCTGACA  
AAGTGGGAACGGCAGTTCGATCAGTTGGTAGACAAAGTGGTGGAAGACTTACGCGGCTAC  
TGGCAGACGCTGCAGACCCCCAGTAATATTGTTACGTGGAGATGCCAATACCTTAAAAAT  
GCTATCGCTATCGATTTAGAAAAAACATGCTGGTGGCTTTTCGCTTTGTTAGCACAAACAT  
GGTCATGGATAGGAGATGCATCAAATGATCGCATAGGGCGCTCACGAATGCTTCTAGCTT  
TTTATTGAGAATCACAAAGAGAAAAAGTTTATACAGACTATGAAATTACCTACAGGTGTAG  
AGTGGTCATTAGGACAATTTGATGATTTATAGAATAATCTATAAGAGATATTTTTTATAT  
ATTATGTAACCTTTTTTTACTAACAATACTGCTTTGCTACTAACACTATGGTTCGAGCACG  
TAGAACCAAACGTGCATCTGTTACTGATATATACAGGGGCTGCAAGGCTTCTAATACTTG  
CCCTCCTGATGTAATCAATAAAGTGGAACAATCAACAATAGCAGATAAGATTTTAAAAATA  
TGGTAGTGCTGCTGTCTTTTTTTGGTGGGCTGGGTATTAGCACTGGTTCGTGGTACAGGCGG  
TGCTACAGGCTATGTGCCTTTGGGGCAAGGACCTGGAGTGCGAGTGGGTGGCGCCCCCAC  
AGTGGTCCGCCCCGGGGTGATACCTGAAGTAATTGGACCAACCGAACTGATACCTATTGA  
CTCAGTCACACCAATTGACCCTACAGCACCTTCAATTGTGTCAATTAAGTACAGTAGTGC  
TGTTGACCTTTTACCTGGAGAGGTTGAAACTATTGCAGAAGTTCATCCTGGCCCTATAGA  
CCCTATAGAAATTGATACCCCTGTTGTGAGTGGAGGCCGAATACCAATGCTATATTGGA  
AGTGGCTGACCCTCATCCACCCACTAGAGCTACTGTTAGCAGAACTCAATATAATAATCC  
TGCTTTCCAAATAATTTCTGAAGTAATCCCTACCTCTGGAGAGTCTTCTCTTGCAGATCA  
CGTGTTAGTGCTCTGAAGGGTCTGGTGGCCAGCAGATAGGAGGTACCAGAACAGCAGAAGA  
AATTGAGTTGCAGCCTTTGTTATCTAGATATAGTTTTTGAAATTGAGGAGCCAACACCACC  
GCGAAGAAGTAGCACCCCTTACAAAGAGCAAGACAACAGTTTTTCATCATTACGCAGAGC  
ATTATATAATAGAAGGCTAACTGAGCAAGTGGGTGTCACTGACCCTTTATTTTTTCACATC  
ACCTTCCAAATTGGTGCGTTTCCAATTTGACAATCCTGTATTTGATGAACAAGTAACACA  
GATATTTGAGCAGGACATAGCAGACTTTGAGGAACCACCCGATAGACAGTTTTTGGATGT  
GGTTAAATTAGGTAGGCCAACATTAAGTCTGCAGAGGGATATGTTAGAGTGAGTCG  
TTTGGGAAGACGGGGAACGATCCGAACACGCAGTGGTACACAAATAGGATCACAAGTACA  
TTTCTATAGGGATTTAAGTACAATTAATACAGAAGAACCCTTAGAAATGCAGTTATTGGG  
TGAGCATTACAGGTGATGCTTCAATTGTACAAGGTCCTGTAGAAAGCACTTTAGTGGATGT  
AAATGTGACTGAGGTTCCCTGAAGGTGTTCTTACAGAACTTCTATGGATCCAGATACTTT  
TAATTCAGAGGATTTATTACTGGATGATGCTATAGAAGACTTCAGCGGATCTCAGTTAGT  
TGTAGGAACCTCCACGCAGATCCACTACGTCAATCACTGTACCTAGATTTAGACTCCTCA  
AAATCCTACCATATATTATCAGGATATACAGGGGTATCATGTTTCATATCCCGAAAGCAG  
AGAAAGACCCGCCATTATTTATCCTACACCCGATATTCCCTACAGTAGTTATACATGTTGC  
TGATTCCTCTGGAGATTTTTTATTATACATCCCAAGTTTACGATGGCGACGGCGCAAACGCAA  
ATATTATAAATGTTTTTTCAGATGACACTTTGGCTTCCCTGCATCTGGTAAAAATATACTTGC  
CACCAACACCTCCAGTTGCGCGCGTTCAAAGCACGGATGAATATGTGGAACGAACAGACA  
TCTATTACCATGCAACTAGCGATCGCCTATTAACAGTAGGCCATCCATATTTTGATGTCA  
GATCACAGGATGGTCAAAAAATTGAAGTTCCCTAAGGTGTCAGGAAATCAATATAGGTCAT  
TTGGGGTAACCTTTCCAGATCCCAATAAGTTTGCTTTGGCAGACATGTCTGTTTATGATC  
CAGATAAATATAGGCTGGTGTGGGCTGCAAAGGCCTTGAAATAGGCCGAGGACAGCCAT

TAGGAGTTGGAAC TACAGGACATCCTCTATTTAATAAAGTAAGAGATACTGAAAAC TCCA  
GTAATTATCAAAACACATCTACTGATGACAGACAAAATACCTCTTTTGATCCTAAACAGG  
TGCAAATGTTTATAATAGGCTGCACTCCTTGTCTAGGAGAATACTGGGATAAAGCACCTG  
TATGTGATAATGCAGGGGACCAGACAGGCCCTATGTCCTCCACTAGAATTGAAAAATAGTG  
TAATTGAAGACGAGACATGTTTGATATAGGATTTGGCAATATAAACAACAAAAC TCTAT  
CCTTTAATAGATCTGATGTAAGTTTGGATATTGTTAATGAAACCTGCAAATACCCAGATT  
TTCTTACCATGTCTAATGATGTTTATGGTGATTCTCTGCTTCTTTTTTGTGCGACGGGAGC  
AATGCTATGCCAGACATTATTTTGTTCGAGGTGGTGCAGTGGGTGACGCTATTCCAGATG  
GTACTGTCAACCAAAATCATAATTATTATTTACCTGCAAAAAATGGACAGGGTCAACGCA  
CTTTAGGGAACTCTACGTATTTTCCAACAGTTAGTGGATCCTTGGTGACGTCTGATGCTC  
AGTTATTTAATAGACCATTTTGGTTACAAAAGAGCACAAGGCCACAATAATGGTATTTTAT  
GGGGCAATCAAATGTTTGTACAGTCGCTGATAATACCCGAAATACAAACTTTACAATCA  
GTGTATCCACTGAAAACGGGGGTGCTCAAGAATATGATTCTGCAAATATTAGAGAATATT  
TAAGACATGTTGAGGAATACCAATTGTCATTTATATTGCAATTGTGTAAGGTTCTTTTAA  
ATGCTGAAGTGCTGACACAGATTAATGCTATGAATTCTGGAATATTAGAAAATTGGCAAT  
TAGGCTTTGTACCCACCCAGACAATTCTGTACACGATACATATCGTTACATAACATCTA  
AAGCAACTAAATGTCAGATGCAGTGCCTGAAACAGAAAAAGAAGATCCCTTTGGTCAAT  
ATACATTTTGGAAATGTGGACATGACTGAAAAATTGTCTCTAGATTTGGATCAATATCCTT  
TGGGGCGCAAAATTTTTATTCCAAGCAGGTTTACAAACAGCACGAACACGTGCTGTCAAAC  
GGCGGTAGTAAGAAAATCTTCCAATCTGTAAAACGCAAAAGGACCCAGTAACCGTTTT  
CGGTGCGCCCAATAAAATTTTAACTAATGTGGTATGTGAAGCATTTTTTTGACCTTCTTT  
GTGACTAAACCGAACAAGTCAACACCAGTAACCGCGCCCGGTTAATCAGATTATAAATTC  
CTGAAGGGCAGATTTCAATCAGTGCAGATATCATCTAGCACCTGCAGCAACCGCCAAGAC  
TTTGCCAGGACTTGGCAGAA

>gi|1020226|gb|U31786.1|HPU31786\_Human\_papillomavirus\_type\_37,\_complete\_genome

AGCCAAGAATATTTGGCAGAACATTTTCTTGGAAGACAACCGATAACGGTAAGATTGTAA  
TCTTTCAACCGTAGGCGGTACTTTCTGATTGGTTTGGCCGATTGTAGCTAACAACAATCT  
TTCTTCATAAATACATGTAACCGCCTGCGTTAACTTACATGATCTAAATAAATATGATGA  
GCAATACTTAAGAGAATATATGGCTAGGCCTAAGCCTCAATCTGTTCAACAGCTTGCAGA  
TACTTTATGTATACCTTTAGTAGATGTTTACTGCCTTGCAGATTTTGTATAGATTCTT  
AGCATATATAGAATTGATCGCATTTGATCGAAAAGGTCTTCAACTAATTGGACCGAAGA  
AGATTTAGTGTATGCGTGCTGTACTAGCTGTGCCTATGCTACAGCACAGTTTGAATTTAC  
CAGTTTCTATGAGCACTCAGTTAGTGGGAGGGAGATAGAAGAGATAGAGCAAAAGCCAAT  
AGGAGAAATAGCCATACGCTGCAAATTTTGCTTAAAGTTATTGGATTTGTTAGAGAAGTT  
GGAGACTTGCTATACTCAGCAACAATTTACAAGGTTAGGCGCAATTGGAAAGGCTTGTG  
TAGACATTGTGGGTCGATAGGATGATTGGGAAAGAAGCTACAATACCAGAAATAGTGCTT  
GAGCTGCAAGAGCTTGTCCAGCCCACTGCTGACCTGCATTGTTACGAAGAGTTGAGTGAA  
GAAGAGACAGAGGAGGAGCGTCCTCACATCCCCTTACAAGATTGTAGCTCCGTGCTGCTTT  
TGTGGTTCTAAACTACGACTGATAGTTGTTGCAACGCCTATTGGAATTAGATCACAAGAA  
GAGCTATTACTTGGTGAAGTGCAGCTGGTTTGTCCAAACTGTGCGGGGAAGCTTCGCCAT  
GACTGACGACACGAAAGGTACAAAATTTGATCCTAAAGAAGGATGTAGTGATTGGTTTGT  
GCTAGAAGCAGAAATGCTCTGACAATAGTTTAGATGGTGATTGGAAGTTATTTGAAGA  
AGGGAATGATACTGACATTTCTGATTTAATAGATGATGAGGACACTGTTCAAGGAAATTC  
CCGCGAATTGTTATGCCAGCAACAAAGTGAGGAAAGCGAGCAACAAATACATTTGCTAAA  
ACGAAAGTATTTCAAGTTCACAAGAGATTCTGCAGTTAAGTCCTCGTCTGCAGTCTATTAC  
TATTTGCGCCACAGCATAAGTCTAAAAGGAGATTATTTGAAGGAGACAGCGGACTAGAACT  
GTCATTTAATGAAGCTGAAGATTTTACTCAGCAGACTTTGGAGGTGCAGGAGGTATCGGC  
ATCCGGCTCTGAGCCGGCAGACCAGGGTGCCAAGGGACTGGGCATTGTTAAAGACCTTCT  
TAAATGTAGTAATGTTAAAGCTATGTTGTAGCAAAATTTAAAGAAGCATTTGGAGTTGG  
CTTTATGGAACCTTACTAGGCAATATAAAAGTTGTAAAACATGTTGCAGAGATTGGGTTGT  
AACGTTGTATGCAGTTCAAGATGAACCTGATAGAAAGCTCAAACAGCTGTTGCTTCAACA  
CTGTGCTTATATATGGTTGCAGCATATGCCCTCAATGTGTTTATATTTATTGTGTTTTAA  
TGTGGGTAAAAGTAGAGAAACTGTTTTTACTGCTAATGAATTTATTGCAAGTAGCAGA  
AGTACAAATATTGGCTGAACCTCCAAAGCTTCGGAGCACATTATCTGCACTGTTTTGGTA  
TAAAGGTAGCATGAATCCAAATGTCTATGCACATGGTGAATATCCTGAGTGGATTATGAC

ACAAACCATGATCAATCACCAATCAGCAGAAGCTACACAATTTGATTTATCCACTATGAT  
ACAATATGCATATGACAATGATTTAATAAATGAAGATGAAATTGCTTATAATTATGCCAA  
ATTAGCAGATACAGACGCTAATGCCAGAGCTTTTTTACAGCACAATAGTCAAGCCAGATT  
CGTTAGAGAATGTGCACTAATGGTTAGATATTACAAACGAGGTGAAATGAAAGATATGAG  
CATATCTGCCTGGATACATAATAAAATGTTAGTTGTGGAAGGCGAAGGACATTGGTCTGA  
TATTGTAAAGTTTGTAAAGATTCCAAGATATCAATTTTATAAGGTTTCTAGATGTCTTTAA  
ATCATTTTTTGCATAACACTCCTAAAAAGAATTGTCTTTTATTTTATGGTCCACCTGATAC  
AGGCAAAATCAATGTTTTACTATGTCTTTAATTAAGTGTTAAAAGGAAAAAGTTTTATCCTT  
TGCAAATTATAAAAGTAATTTTTGGTTGCAGCCGTTGGCAGATACTAAAAATTGCTTTAAT  
AGATGACGTCACGCATGTGTGTTGGGATTACATAGATCAATATTTAAGAAATGGATTGGA  
TGGTAATTTTGTTTGTTTAGACCTAAAACATAGAGCGCCATGTCAAATTAAGTTTCCACC  
ATTATTACTGACTTCCAATATGGATATTATGAAGGAAGAAAGGTATAGATATTTACATAG  
CAGGGTGCATGCTTTTGCATTTCCAAATAAGTTTCTTTTGATAGTAACAATAAGCCACA  
ATTTGCACTTACTGACCAAAGCTGGAAATCTTTTTTTGAAAGGCTTTGGAAACAGTTAGA  
TCTCAGTGACCAAGAAGACGAGGGAGACGATGGACACACTCAGCGATCGTTCAATGCAC  
TGCAAGAGAACCTAATGGACATTTATGAGTCAGGTCGAGATGACCTAGAGACCCAAATTA  
TGCATTGGCAACTTCTAAGGCAGGAGCAGATCCTGTTTCATTATGCCAGAAAAAATGGAG  
TCATGCGTTTAGGATATCAACCTGTACCTCCTTTAGCCACCAGTGAAGCTAAAGCAAAG  
ATGCAATTGGCATGGTTATATTATTAGAAAGTTTACAACAGTCTGCTTATGGTAAAGAGT  
CCTGGACACTTACACAAATGTTTGGAGACCGGTGAGGAGTCCACCTGCAAATTGTTTTTA  
AAAAGGGCCCTCAGAACATTGAAGTGATGTTTGACAATGACCCTGAAAAATCTAATGGTGT  
ATACTGCCTGGTCATTTATTTATTATCAGACTGTAGATGACACGTGGAACAAGGTTGAGG  
GACATGTTGACTACTATGGTGCATATTATTTTGAAGGAGATTTAAAAAGTCTATTATATAC  
AATTTGAAGGTGATGCTGCCAGGTTTAGCAAACTGGACGCTGGGAAGTACATGTTAACA  
AGGACACTATCTTTGCTCCTGTTACTAGCTCTTCGCCGGCAGCTGGAGAAGGGACAGACG  
GGGCGCCTCCGTCCACACCGTATCCGGGTCGCCGCTCGCACGGGGATTCTCTACCACCT  
CCGTGTCCACCAGAAAACGGACACCACCGCGATACAGAAGAAAAGCATCTAGCCCTA  
CAACCACCGCCGCCCCGGCAAAAAAGACAAGGAGAAGACACCGCAACAAGGCGATCAAGGT  
CCACCTCCCAGGGGAAACAAGCAACCTCCAGGGGAGGGGACCGACGCAGACGGAGACGAG  
AACGCTCCTACTCCCGAGACACCTCCAGTTCCTCCGACAGGGGAAGGGGAGGGAGAAGTA  
GAGGGGGGCCCCGAGACACGATCCCAATCAAGGTCCCTCTCACGATCCCGGTGCGGTCGC  
GATCCAGAGGGTCTTCTTCCAGGGGTGGCGTTGCGCCTGACGCAGTGGGAAAGTCAGTTC  
GAACAGTTGGTAGAGACCATAGTGGACGACTTAAAAGATTACTGGACGAAGCTAGGGATC  
CCCCAGTAATTGTGCTGCGTGGTGATGCTAACAATTAATGCTATCGCTATAGAGCTA  
AGAAAAAGCATGGAAACCTAGTTAAGTACTACAGTACCACGTGGTCATGGGTTGGGGGCA  
GCACCAATGATAGAATTGGAAGGTCACGCATGTTACTTGCATTTCAATCCAATACAGAAA  
GAGAGTTGTTTTTAAAACTATGAAATTACCACCAGGAGTTGATTGGTCACTGGGTCATT  
TAGATGAATTGTGAAAACAGCTTTTTTTATAACAACTAACATTGCTTTTTGCTTTTGCTAC  
TAACCTACTAACGTTCCAATGGCTCGCGCACGTCGTACCAAACGTGCGTCTGTAAC TGAC  
ATTTACAGGGGTTGCAAGCAGGCCGGCAGTTGCCCCCGGATGTAATTAATAAAGTGGAA  
CAAACAACAATTGCAGACAAAATTTTGAAGTATGGTGGTGCTGGTGTTTTTTTTGGTGGG  
CTTGGGATTAGCACCGGCCGAGGAACAGGTGGTGCTACAGGATATGTCCCTTTGGGGGAA  
GGCCCTGGAGTGCGCGTAGGAGGCGCACCCACCATTTGTTGCGCCCTGGGGTCATACCTGAA  
TTGATTGGGCCAGCAGATGTAATACCTATTGACACAGTCACTCCAATTGACCCCGCAGCA  
CCCAGTATTGTCACAATTACAGACAGTAGTGCTGTTGACCTTTTACCTAATGAAATAGAA  
ACAATTGCAGAAGTGATCCTGTGCCAACAGACAATTTGGATATTGATACTCCTGTAGTT  
ACAGGAGGCCGGGATTCCAGCGCTGTTTTGGAAGTTGCTGATCCTAGTCCCCCTGTGCGA  
ACAAGAGTTTCCAGAACACATAATCATAATCCTTCTTTTCAAATAATAACTGAATCTACA  
CCTTTAGCAGGAGATCTGCTTTAGCTGACCATGTTATTGTTTTTTGAAGGCACTGGAGGA  
CAAAATATAGGTGGTTCTCGAAATGCAACTATAGAAACAGCTCAAGAAAGTTTTGAAATG  
CAAAGTTGGCCGAGTAGGTATAGTTTTGAAATAGAAGAAGGAACACCTCCTAGATCTAGC  
ACACCAGTACAAAGAGCAGTACAATCACTCTCTAGTTTTAAGACGGGCATTGTATAATAGG  
AGATTAAACAGAACAGGTAGCAGTCACGGATCCTTTATTCTTGAGTAGACCCCTCACAATTA  
GTACAGTTTTCAGTTTGACAATCCTGCATTTGAAGAAGAAGTAACCTCAAAATTTGAGAGG  
GATTTAGAGGCTGTAGAAGAACCTCCAGATAGACAGTTTTTTGGATGTTATTCGCTTAGGT

AGACCTACTGTTGCTGAAACACCACAAGCGTATTTAAGAGTAAGCAGATTAGGACGTCGT  
GCTACCATCCGTACTCGTAGTGAGCACAGGTGGGGGCTCAGGTACATTTTATAGAGAT  
TTAAGTACTATAGATTCTGATGCCCTAGAAATGCAATTATTAGGAGAACATTCAGGTGAT  
ACTACTATAGTACAAGGACCTGTAGAAAGTTCATTTGTTGATATAAATATTGATGAACCA  
GGTCCCTTAAATATAGGGCAACAAGAGTCTACTATGGCAGATGACACAGATTTTAATTCT  
GCAGATTTTATTGTTAGAGGATGCTGTAGAAGACTTCTCAGGATCTCAGTTGGTTTTTGGGA  
ACCTCACGCCGCAGTACAAATTCTATCACAAATACCTAGATTTGAAACTCCAAGAGATACT  
GGATTTTATATACAAGATATTCAAGGTTACAATGTAGCCTATCCTGAGTCACGTGACACA  
ACACAAGTTATCTTGCCACAACCTGAAACACCAACTGTAGTTATTAGATTTGGAGAGGCA  
GGTACAGACTATTATTTACATCCTAGCTTAAAAAAGAAAAAGAGAAAAACGCAAATATTTA  
TAATTGTTTTTACAGATGACTTTGTGGCTGCCAGCGACGGGTAAAGTATACTTGCCCTCCA  
ACACCACCAGTAGCCCGGGTGCAAAGCACGGATGATTATGTGGAAGAACAATGTATTC  
TATCATGCCATGAGCGATCGTCTCCTAACTGTAGGACACCCATATTATGATGTAAGATCT  
AGTGATGGCTTAAAAATCGAGGTTCCCTAAAGTATCTGGAAATCAATACAGAGCTTTTAGG  
GTTAGGTTGCCAGATCCAAATAAATTTGCTTTAGCAGATATGTCAGTATATAATCCAGAA  
AAGGAAAGGTTGGTGTGGGCCTGTGCGGGCTTGGAGATAGGCCGAGGGCAACCACTTGGA  
GTAGGAACGACAGGTCACCCTTTATTTAATAAATTAAGGGACACTGAGAATAATAGTAAT  
TACCAAGGGGGGTACGGGATGATAGACAAAACACATCATTGTGATCCAAAACAAGTACAG  
ATGTTTGTGGTTGGATGTGTGCCATGCATGGGTGAACATTGGGATAAAGCACCAGTTTGT  
GCATCAGAGGAAAAATAATCAGACAGGACAGTGTCCACCACCTGAATTAAAAAACACAGTG  
ATTGAAGATGGGGACATGTTTGATATAGGGTTCGGAAATATTAACAATAAGGTTCTCTCT  
ACTAATAAATCAGATGTTAGTTTAGATATAGTTAAATGAAATATGCAAATACCCTGATTTT  
TTAACAATGGCTAATGATGTTTATGGGGATGCATGTTTCTTTTTTGCTAGGAGAGAACAA  
TGTTATGCCAGACATTATTTTGTAAGAGGGGAAATGTAGGTGATGCTATTCCCGATGGC  
ACTGTTAATCAGGACCACAAATATTACTTACCTGCCAAATCAGACCAGCAGCAGTATCTG  
TTAGGCAATTCTACCTATTTTCCCACTGTTAGTGGATCTTTAGTAACATCTGATGCTCAG  
CTCTTTAACAGGCCTTTTTGGTTACGCAGAGCTCAAGGTCACAACAATGGCATTTTATGG  
GGTAATCAAATGTTTATCACAGTTGCTGATAATACACGGAACACAAACTTTTCTATTAGT  
GTGTCTACTGACAATGGCGAAGTTACAGAATATAATTCTCAAACACTCAGAGAATACCTA  
AGACATGTTGAAGAATACCAGCTTTCAATTATTTTACAACCTTTGTAAAGTTCCTTTAAAG  
GCTGAGGTTTAACTCAGATAAATGCAATGAATTCTGGTATATTGGAAGAGTGGCAATTA  
GGATTTGTACCTACTCCAGATAATTCAGTACATGACCTTTATAGGTACATTAATTCAAAG  
GCTACCAAGTGCCTGATGCAGTTGTTGAAAAAGAAAAGGAAGATCCCTTTGCAAATAT  
ACATTTTGGAAATGTAGATTTAACTGAAAAATTATCATTGGATTTAGATCAATATCCTTTA  
GGGAGGAAATTCATCTTTTCAGTCGGGATTGCAAAGTAGACCTAGAATTGTTGATCGTCT  
GTAAAAGTGTCTAAAGGTACAAAGCGTAAACGGTTCGTGACCGTTTTTCGGTTTCCAATAAA  
CAAATAAAACCAATAAGGTATGTGAAGCATTTTTTACCATGTTTCGTGACTAAACCATATAA  
GTCAACGCCAACCAACCGCACCCGGTTAATCAGATATAAAACACCTGGTGCGATTTTATC  
AGAGCTTTTGTGGAAGCACCTGAGGCGACCGCCAGAACTGC

>gi|1020218|gb|U31785.1|HPU31785\_Human\_papillomavirus\_type\_36,\_complete\_genome

GTAAGTTATTTAATTTATGTACCAGGTGCGGTACTGGAATTTCAATAATAATTGTTGT  
TGCCAACTACCATTGCTATATTCAAGTTTTTGCCGTGATCGTTTTTCGTATCATGTGAATA  
ATATACTGTATAGTATAAATAAATAAATAAATATATATATATATGCTTCAAAGGTTGGGT  
TTTTTAATAATTAAGGCAAATGGCAGAGCAAGCCTCCGAACAGCAGAATATTACAGAAAA  
AGAAAAAGAACAGCTGCCTTTAACTATTAAGGGCCTGTCAGAATCATTAGGCATTCCGTT  
TGTAGACTGTCTAATACCTTGTAACCTTTGTGGCAAATTTTTAGATTATTTAGAAGCTTG  
TGAGTTTGAGGTTAAAAAGCTTAGTTAATTTGGAAGGATTACTGTGTATTTGCCTGCTG  
TCGTGTTTGTGTGGTGCAACAGCCACATATGAGTTTAATCAGTTTATCAGCAGACAGT  
ATTAGGAAGAGATATTGAAATTGGCTGCAGTCCATATTTGAAATTGACATTAGGTG  
TCAGACGTGCTTAGCTTTTTCTTGACATAATTGAGAAGTTAGATTGTTGTGGAAGAGGACT  
TCCCTTTTCATAGAGTCAGAAACGCCTGGAAGGAATCTGTAGGCAGTGTAAGCATTTTTTA  
TAATGATTGGTAAAGAGGTCACCGTGCAAGATATTGTTCTGGAGCTCAGTGAGGTGCAGC  
CTGAAGTACTACCAGTTGACCTGTTTTGTGAAGAGGAATTACCAAACGAGGATACGGAGG  
AGGAGCTTGACACCGAAAGAATCGTTTTTCAAAGTCATTGCACCGTGTGGTTGCAGCCACT  
GTGAGGTCAAGCTCCGCGTTTTTGTCCAAGCTACAGAATTTGGCATCAGAGCATTTCAAC



AGTTGCTGACCGGTGACCTGCAGCTTCTGTGTCCCGAGTGTCGTGGGAACTGCGAACATG  
GCGGATCCTAAAGGTAGTACATCTAAAGAAGGGTTTGGTGATTGGTGTATTTTGGAAGCT  
GACTGTAGTGATATAGAAAATGATATGGAACAATTATTTGAAAGAGATACAGATTCTGAT  
ATTTTCGGACTTAATAGATGATTGTGACCTGGAACAGGGAAATTCTTTGGAACATTTTCAC  
CAACAGGAGTGTAAGCAGAGCGAGGAGCAATTACAAAACTAAAACGAAAGTGTCTTAGT  
CCAAAAGCTGTCGCACAGCTTAGTCCGCGACTTCAGTCAATTTTCATTGTCACCTCAGCAG  
AAGTCTAAGCGAAGGCTCTTTGCAGAGCAGGACAGCGGAGTCGAGCTGACCTTAAACAAT  
GAAGCTGAAGATGTTACTACTGAGGTGGAGGTACCGGCTATAGACTCTCGGCCGGATGAC  
GAGGGAGGATCAGGGGATGTAGATATACATTATCTTTCACTGTTGCGTTCCAGCAACAAA  
AAAGCCACATTAATGGCAAAATTTAAAGCAGCGTTTGGGGTAGGCTTTAATGAATTGACA  
CGTCAATTCAAAAGTCACAAAACCTGCTGTAATCATTGGGTTGTCTCTGTTTATGCAGTC  
CATGATGATCTATTTGAAAGTTCAAAGCAGTTGTTGCAACAGCATTGTGACTATTTATGG  
GTTTCGTGGGATAGATGCAATGTCATTATATCTATTGTGTTTTAAGGCGGGAAAAAATCGC  
GGGACAGTGCAATAAGTTGATGACTTCAATGTTAAATGTGCATGAACAGCAGATTTTGTCT  
GAGCCTCCAAAGTTAAGAAATACTGCTGCTGCATTGTTTTGGTACAAAGGCTGTATGGGA  
TCGGGGGTGTTCAGTTATGGGCCATATCCTGATTGGATTGCACAACAGACTATATTAGGT  
CACAATAATGCTGAAGCAAGCACCTTTGATTTTTTCACAGATGGTACAATGGGCCTTTGAT  
AATCAGTTAGTTGATGAAGGAGATATTGCATATCGATATGCAAGGCTTGCAACCAGAAGAT  
GCCAATGCTGTTGCATGGCTTGCACATAATAGTCAAGCTAAATTTGTAAGAGAGTGTGCA  
GCAATGGTGCCTTTTTATAAAAAAGGTCAAATGAGGGATATGTCCATGTCGGAATGGATC  
TATACTAAAAATACATGAGGTAGAAGGTGAAGGTCACTGGTCAGATATAGTAAAAATTTTTTA  
AGATATCAGGAGGTAAACTTTTATAATGTTTTTGGCTGCATTCAAAGATTTTTTGCCTCA  
AAGCCAAAAAAAATTGTATTTTAATTCATGGCCCTCCTAATTCAGGAAAAGTCATCATTT  
GCAATGTCATTAATAAGGGTATTA AAAAGGCAGAGTATTATCTTTTGTA AATTCAAAAAGC  
CAATTTTGGTTGCAACCCCTTTCTGAATGTAAAATAGCATTGATTGATGATGTA ACTGAC  
CCCTGTTGGTTATATATGGATAATTATCTAAGAAACGGTTTAGATGGGCATTATGTCTCA  
TTGGATTGTAAATACAAAGCTCCAATGCAAAACAAAGTTTCTCCATTATTACTAACATCT  
AATATAAATGTGCATGAGGAAGCTAATTACAGATACTTACACAGTAGAATTAAAGGATTT  
GCATTTCCAAATCCATTCCCAATGAAATCAGACGATACACCTCAGTTTGAGTTAACTGAC  
CAAAGCTGGAAATCTTTTTTTGAAAGGCTTTGGACACAATTAGAACTCAGTGACCAAGAA  
GACGAGGGCGAAAATGGAGAATCTCAGCGAGCGTTTCAATGCTCTGCAGGATCTGCTAAT  
GAACATTTATGAAGCTGCAGAACAGACACTTGAGGCACAGATAAAAACACTGGCAAACCTT  
GCGACAAGAAGCTGTTTTGTCTACTTTGCTAGGCAGAGAGGTGTGACAAGGCTTGATA  
TCAACCTGTGCCTGTAAAAGCTGTATCTGAAGCAAAAGCTAAAGAGGCTATAGCAATGGT  
GCTGCAGCTTCAGTCTCTACAAACGTCTGAATATGCATCTGAAACTTGACATTAGTTGA  
CACCAGTATAGAAACTTTT TAGAAGCGCTCCAGACGGTCACTTTAAAAAGGGTCCAGTGCC  
TGTAGAAGTGATTTATGACAATGATGCAGATAATGCCAATTTGTACACTATGTGGACATA  
CGTGTATTATATGGAAGACGATGTGTGGCATAAAGCCAGAAGTGGGGTCAATGAGACTGG  
CATATATTATTTACAAGGAACATTTAAATATTACTATGTACTATTTGCTGACGATGCACG  
TAAATATAGTCAAAC TGGACAATGGGAAGTGAAAGTTAATAAGGAAACTGTCTTTGCCCC  
TGTCACCAGCTCCACCCCTCCAGGGTCGCCAGGAGGACAAGCAGACACAAACGCCCTCCTC  
CAAGACCTCCACCACCACCACAGCCACCGTTGACTCCACGACCAAGCAGCTCACCACATC  
AGAACAGCCACAACAAACCGAAACCAAAGGAAGAAAGTACGGACGGAGGCCCTCCAGCAG  
GACAAGGAGACCGCAAGCGAAGCAAAGGCGATCAAGGTCCAGACACCGATCCTCTAGGTC  
CCGATCGCGGTCCAGTCCCGGTCCCACACCCCAACCACTCGGTCTGCCACCACCCGGTC  
TAGGTCCCCGTCGCTCGCCAAGACTGGGGTCCAGCGGGTATCAACCAGATCACGATCCAG  
AAGCACCTCTAGAAGGGGAGGTAGAAGGCGGAGGTCACGGTCACCATCCACCTCCTCCTC  
CACCACCCACCAACAAACGGTCACGAGTGCGGGGCCGAAACCACAGGGTCCAGAGGGGC  
GCGAGGGGGTAGAGGGGCGGGGTGGGAGCGGTGGGGGGCGGCGACGAGGACGATCATC  
CTCCTCCACCTCCCCCGCCCAAAACGGTCAAGAGAGCACTCTGTTAGGAGCCGTGGCGT  
GTCTCCTGACCAAGTGGGAAAGTCACTTCGATCTGTTAGTTCAAACATACAGGACGACT  
TGGAAGATTACTGGAAGAAGCTCTCGATCCCCCAGTGATCCTTGTTAGAGGGGAGGCAAA  
TACACTAAAAATGCTTTTCGCAACAGAGCTAAGATAAAATACATGGGACTGTATAGGTCATT  
TAGTACAAC TGGTCATGGGTGGCAGGAGATGGCACTGAGCGTCTAGGCAGGCCCAGAAT  
GCTCATTAGCTTTTCGTCCTACAATCAGAGAAGGGATTTTGATGACGTGGTGAGATACCC

GAAAGGAGTTGAAAAATCATATGGCAACCTTGACAGTCTCTAACCAC TAATGCTATGCTG  
CTTTGCTACTAACAACACTAACAAATTAGCTTTTTTATACTTTTTTACTTTTGTACCTGCA  
ATGGCGCGTGCTAAAAGGGTCAAGCGAGACTCTGTAACACATATATACCAGACCTGCAAA  
CAAGCAGGCACATGCCCCCTGATGTTGTGAATAAAGTGGAACAAACAACAGTTGCTGAC  
AATATTTTGAAATATGGCAGTGCTGGTGTCTTTTTTGGTGGCCTTGGCATTGGTTCGGGC  
CGAGGTACTGGGGTGCTACCGGGTACGTGCCACTTAGTGAAGGTCCCTGGTATCCGTGTC  
GGAGGTACCCCCACGGTTGTAAGGCCTTCATTAGTTCCTGAAGCAATTGGGCCAGTCGAT  
ATTTTGCCCATTGATACAATTGATCCTGTGGAGCCTACAGCATCGTCCGTGGTTCCTCTT  
ACTGAATCCACTGGACCTGATTTACTTCCAGGTGAGGTGGAACAATAGCTGAAATTCAT  
CCTGTTGCTGAAGGCCCATCAGTTGATACCCCTGTGGTTACCACAAGCACGGGTTCAGT  
GCTGTTTTGGAAGTTGCTCCAGAGCCTATACCTCCAACACGGGTTAGAATCTCACGTACA  
CAATATCACAAATCCTTCCTTTCAAATTATTACAGAATCAACACCTGCACAGGGTGAAAGC  
TCTCTTG CAGATCACATTTTAGTGACATCAGGGTCCGGGGGACAAAGAATAGGGGCTGAT  
ATTACTGATGAAATTGAACCTCAAGAACTTCCTAGTAGATATACTTTTGAAAATGAAGAA  
CCAACCTCCACCTAGACGTAGCAGCACACCTTTACAGGCCACACGAGCTGCAGGTAGACGG  
AGAGGTGTTTCTTTAACTAATAGACGTCTAGTACAGCAGGTACCTGTAGAAAATCCTTTG  
TTTTTAACTCAACCTCTCGATTGGTGCGTTTTGCTTTTGAAAATCCTGCATTTGAAGAA  
GAAGTTACAAATATATTTGAACATGATGTAGATGCTTTTGAAAGAACACCAGATAGGGAT  
TTCTCTTGATGTCCAACGGTTGGGTGCGTCCCAATATTCTACAACCTCCTGCAGGGTATGTG  
AGGGTTAGTAGATTAGGTACTCGTGCAACCATTCGCACGCGGTCTGGTGCAAAATAGGG  
TCACAGGTGCACTTTTATAGGGATCTCAGATTCCATTAATACTGAAGATCCTATAGAATTG  
CAGTTGTTGGGGCAACATTCGGGGGATGCTAGTATAGTTCAAGGCCCTGTGGAAAGCACA  
TTTATAGACGTAAATGTGTCTGAAAATCCTTTGTCTGAAAGTGTGGAAAGCCTTTTCTGAT  
GATTTATTGCTGGATGAAGCTGTGGAGGATTTTAGTGGGTCACAATTAGTTATTGGTAAT  
AGAAGAAGTACCCTTCTTACACTGTTCCCAGATTTGAAACTACTAGGAGTGGTTCCTTAT  
TATGTCCAGGACAGTAAAGGATATTATGTTGCATACCCAGAATCTCGCAATAATGCAGAA  
ATAATTTATCCTACACCTGATATACCTGTAGTGGAATACACACTCATGACAATACAGGT  
GACTTTTATTTACATCCTAGTCTTCGATGGCGCAAACGTAAGAAATATTTGTGATTT  
TGCATTGCAGATGGCAGTGTGGCATTTCGGCTAATGGTAAAGTATACCTTCCTCCATCGAC  
ACCGGTTGCCAGGGTGCAAAGCACGGATGAATATATACAAAGGACAAATATTTATTATCA  
TGCATTACAGCGACAGACTACTGACTGTAGGCCATCCATACTTCAATGTTTACGATATTAC  
TGGTAACAAATTAGAAGTCCCTAAAGTGTCTGGTAACCAACACAGGGTTTTTCGCTTGAA  
ATTACCTGATCCTAATAGATTTGCATTAGCTGACATGTCAGTTTATAACCCAGATAAAGA  
ACGGTTGGTGTGGAGCTGTAGGGGCCCTGAAATAGGTAGAGGACAACCGTTAGGTGTTGG  
CAGTACGGGACACCCACTATTTAATAAGTTGAAAGACACTGAAAACAGTAATTCATATAT  
AAAATCTTCTAAAGATGATAGACAGGATACATCATTTTGATCCCAAACAAATTCAAATGTT  
TATCGTGGGATGCACACCTTGTATAGGTGAACATTGGGACAAGGCTATACCTTGTGAAAA  
GGAGCGCCAGGACAACAGACTATGCCCCACCAATTGAATTGAAAAC TACTTATATAGAAGA  
TGGCGACATGGCAGATATAGGTTTTTGAAAATTTAAACTTCAAAAATCTGCAAGAGAGTAG  
GTCAGATGTAAGTTTGGATATAGTTAATGAAACCTGCAAATATCCTGACTTCTTAAAAAT  
GCAGAATGATGTTTATGGAGATGCCTGTTTTTTTTATGCTCGCAGAGAGCAATGTTATGC  
CAGACATTTTTTTGTCCGTGGAGGTAAAACGGGTGACGACATCCCTGACGCCAGAATTGA  
TAATGGGACTTTTAAGAATCAGTTTTTTCATTCCCTGGGGCTGACGGCCAAGATCAAAGAC  
CATAGGAAATGCCATGTATTACCCAACCTGTTAGTGGCTCATTGGTGTCTAGTGATGCTCA  
ATTGTTTAACAGGCCCTTCTGGCTCCAGCGAGCACAAAGGTCATAATAATGGCATTCTGTG  
GGCTAATCAGATGTTTATTACAGTGGTAGACAACACACGAAATACTAACTTTAGTATTTT  
AATATATAACAATAATGGGGCACTAAAGGACATCAATGATTACACTGCAGAGCAATTTAG  
AGAATATCAAAGGCAGTGGAGGAATATGAAATTTTATTAAATATTACAGCTATGTAAGGT  
TCCTCTGAAGGCAGAGTATTGGCTCAGATAAAATGCTATGAATTCCTTCTTTATTGGAAGA  
TTGGCAGTTAGTTTTTTGTACCTACTCCAGATAACCCATTCAAGACACCTATCGATATAT  
TGATTCAATTAGCCACTCGCTGTCTGATAAAAACCCCCCTAAGGAAAAAGAGGATCCCTA  
CAAGGGGTTAAAGTTCTGGGATGTGGATCTTACTGAACGGTTGTCACTAGATTTGGATCA  
ATACTCTTTAGGTAGAAAGTTTTCTATTTCAAGCCGGCTTACAGCAGACGACCGTAAGCGG  
TACAAAATCAGTGTCTTATCGAGGGTTTACCAGAGGAACCAAGCGCAAAGCGAAAACAGTA  
ATATGACCGTTTTTGGTACAGATTTATAAACTTTTACACAGTATTCAAGGAATGTTTGTT

TACTCTGACTAAGTATAACTCTACCAAGGGAACCGACCGCACCCGGTACAGTCAACGATA  
CTGCTGCCAATATAGACTCTGTTTAGTGCCAGAACATATCATCTTGGAAGCAGATCGACC  
GTGTTTCGTTGTAACACGCTCGGATTAGAGACATTGCCAAGGAAGATTTAATCTACAATCG  
CTGTTGGCAATCGCTTTTGGCTGAGATAGCTGACCGGTAACG

>gi|1020210|gb|U31784.1|HPU31784\_Human\_papillomavirus\_type\_29,\_complete\_genome

TATAAACTATCATCTTCATAATAAAAAGTAGGGAGGGACCGAAAACGGTACGACCGAATG  
GGGTACATATAAAAAGACATCACTGCAGCGTGGCAGAAGCCATGTCCAGAGGTGATGGCT  
ATCCAAAAAATATATTCCTGTTGTGTCAGAGACAGTGGAGTACCATTTGAGGACCTTCGCC  
TACAGTGTGTTTTCTGCACGAAAGAGCTAACCAGCCCAGAACTGGCAGCATTTTGCATTC  
GGGAATTAATGTGGTGTGGAAGAGTGGAGCTCCGTACGGTGCATGTGCACGCTGCTTAT  
TGTTTTGAAGGCATAAAGCGGCGCCTAAAAATACTGGCAGTATTCTTGTTTTGTGGAAGGCG  
TGGAAGCGGAGACAAACGAGTCCATATATACACAGCTAATTCGCTGCTACATGTGCCACA  
AGCCACTTGTTCAGAGAGGAAAAAGACAAACACCGAAACGAAAAGCGAAGACTACACAAAA  
TTTCTGGTACTGGAGAGGGAGTTGCCTGTATTGTTGGTCACGATGCATGGGCCAAAGCC  
CACGGTAAAAGATATTGAATTGGATCTTGCACCAGAGGCCGTACCTTTAGTATGCAATGA  
GCAATTAGACAGCTCAGATGAAGAAGATTGTATAGATGTTGTGGAACCAGCACAAACAGGC  
GTATAGGGTGGTAACTTTGTGTACAAAGTGTAGTACAACACTGCGACTGGTGGTAGAGAG  
CAGCGAAGCAGATATAAGGGCATTCCAGGAGCTCCTACTACGCACATTGAAGATCGTGTG  
TCCTCGCTGTGCGTAACTGGACATGGCCGATAACTCAGGTACAGAGGGGGAGGAGGAGGA  
CTGTTCTGAGGCGGAACCGGCTGGAGGATGGTTTCATGGTAGAGGCTATAGTAGACAGACG  
GACAGGGGACACAATATCCAGTGCAGGAGTAGGAGGATGAGGGTGAAGACATGGTAGA  
CTTTATAGATGATAGACCTATAGGGGACGGACAGGAAGTAGCACAGGAACGTGTGCTGCA  
GCAAGCAGCTGCGGATGACGATGAAGCAGTGCACACTGTAAAACGAAAAGTTTGCTCCCAG  
TCCCTATTTTCAGCCCTGTGTGTGTGCCCAGCATAGAACATGAGCTAAGTCCCAGGCTAGA  
CGCCATAAAGCTGGGACGGCAGTCTCTAAAGCCAAACGGAGGCTATTCCAACCTACCGGA  
CAGTGGGTATGGCCAAACACAGGTGGATACGGACACGGGACCAAGCCAGGTACAAGATGG  
TTGCGAGACGGGTGATCAAAATGGCCGACAGCAGTATAAGGAGGGGAGTGGTACAAAGGA  
TGGGGAAAAATGGCAGCCAAGAGGAGGAGCGTGCAGGAGGGGATGGGGAGGAATCGCAACC  
TCTGAGTACAGAAACAGAGAAAGGAGCATGTGGTGTGTTGTCTATACTGAAAGCTAGTAA  
TCAGAAAGCAACCCTACTAGGTAAGTTTAAAGAACAATTTGGACTTGGATATAATGAATT  
GGTTAGGCATTTTTAAAAGTAGTAGGACAGCATGTGTGGATTGGGTAGTGTGTGTGTTTGG  
GGTGTACTGCACTGTGGCCGAGGGCATAAAACAGTTGATACAGCCACTATGTGAGTATGC  
ACATATACAAGTGCTACCCTGTCAATGGGGAATGACAGTGTTAATGCTGGTGCAGTACAA  
ACGTGCCAAGAATAGGGAGACAGTAGCAAAAGGTCTTAGTACTTTATTAATGTACCAGA  
AAGCCATATGTTAATTGAGCCACCTAAACTAAGAAGTAGTCCAGCAGCATTTGTATTGGTA  
CAAACTAGTATGTCCAATATTAGTGATGTGTATGGCGAGACACCTGAATGGATAGTAAG  
ACAGACAATGGTAGGTACGCATTACAAGAAGTACAGTTTCAGTTTATCTGAAATGGTACA  
ATGGGCATATGATCATGATATAACAGATGAAGGTACCTTGGCATAACGAGTATGCATTGAT  
AGCAGATGTAGACTCTAATGCTGCAGCTTTTCTTGCCAGCAATTGTCAAGCTAAATATGT  
AAAGGATGCTTGCACAATGTGCAGACATTACAAACGGGGTGAGCAGGCACGAATGTCCAT  
GTCTGAGTGGATACGGTTTAGAAGCAACAAAGTACAGGGAGAGGGGGACTGGAAACCAAT  
AGTACACTTTTTAAGATACCAAAATGTAGAATTTATACCATTTCTGTGTGCCTTTTAAGTT  
ATTCTACAAGGCATACCCAAGAAAAGCTGTTTAGTGTTTTATGGACCTGCAGACACAGG  
GAAGTCATATTTTTGCATGAGTCTGTCTAAAATTTATGGGCGGTGTTGTAATTTTCATATGC  
GAATTCACACAGCCATTTTTGGCTGCAGCCATTGTCTGAAGCTAAAATGGGTCTGCTAGA  
CGATGCAACAAGCCAATGTTGGAGTTATGTAGACACATATTTAAGAAATGCATTGGATGG  
GAACGTAATGTGCATAGATAGAAAACACAGGTCCCTACTACAACCTCAAATGCCCTCCACT  
ACTAATAACTACCAATGTGAATCCGTTGGAGGATGACAGATGGAAGTATTGCGCAGCAG  
ACTCAGGTATTTCACATTAGCAATCCATTGCCATTAAACAAGTAAAGGAGAGCCAGTTTA  
TACTACTAATGATCAAAATTTGGAATCATTTTTCAAAGGTTATGGGCACGTTTAAGCCT  
TACCGACCTTGACGACGAGGAGGAAAAATGGAGAACCTAGCGAACCGTTTAGATGCGTGCC  
AGGACAAAAATACTAGAAGTGTATGAAAAGAGATAGCGACAAACTTGAGGACCAGATCACGC  
ATTGGTATCTTATGCGTGTAGAGAGTGCGTTGTATTATAAAGCAAGAGAATGTGGAATGA  
CACGTATAGGCCACCAGGTGGTGCCAACACTTAGTGTAGCTAAAGCTAAAGCATGCAGTG  
CTATTGAAATGCATGTAGCTTTACAACAATTGCAACAAAGTGCATATGGAAAGGAACCAT

GGACACTTCGGGACACTTCACGAGAAATGTGGGACGCAGTACCAAAGAGGTGCTGGAAAA  
AAAGAGGAGTGACTGTGGAAGTTAGATATGATGGAGACGAGACTAAAGCAATGTGCCATG  
TACTGTGGAAGGACATAATTGTACAAAACCTTAGTGATGACCAGTGGGTAAAGTTAAAG  
GTCAAGTCTCATATGAGGGGCTATATTATGTGCACGAAGACGTAAAAGTGTTTTACGTGA  
AATTCCATAAAGACGCACGTGTGTATGGGGAAACAGGCATATGGGAGGTGCATGTGGGAG  
GCAAAGTAATTCATCACAATGCATTTGACCCTGTATCTAGCACACAAGAAGTACCCGCTA  
CTGGACCTCTATACGCCTCCCAACACCACCCGCTCGCCACCCAAGCCCCGTGGGGC  
CTGAGGAGGGACAGGAACGGAAACGACGCAGGCTTGAAGCAGTCGGGCCCTGGGCCACAGC  
AGCAGCAGCAGCAGCAGCACCAGCAGCAGCAGCAGCAACAGACCCCGACCCACACCCCCT  
CCACGCAAGCCTGTGCACGAACGGGTGGACCAGTGGACAGTAACAGGACCCGGGACTGTG  
ACTCTACAAGTCAAAACCCCTACCCGACCCCAAGTGATCCTGACTGTGCACCTGTAATAC  
ACTTACGAGGTGACCCAAACAGTTTAAAATGTTTTAGATATAGGTTACAAAACGGAAAAA  
AAGGGTTGTACTGTAAAGCATCGTCCACGTGGCGGTGGTCCTGTGAACCAGAAAATCAAT  
CAGCATTTGTAACAATATGGTACACAAGTGTTACACAGCGAGCCGAATTTTGGCTAATG  
TTAAAATACCACCAGGTATGCAGGCCATTTAGGCCATATGTCTGTGTTTGACTACTGT  
GCCACAACGTGTAGCAGCCTGGATTTTTATCTGTGTCGACTGTCTCTGTGGGTGTATTTT  
GTGTTGCTTCTGTGTCTTTTCTGGCTATCTGTGCTTCCTGCGCTTACTTGCTACTTGGCC  
ATTGTGTTGTGTTTATACCTAGGATTGGTGGCACTATATTTACAAGTTGTGCAGCACATT  
GCACGAAACACTTAGGCTATCATGTATCCTATAATAATTATAGATGGGTATGGGGATCGT  
ACTATTGTGTTGTTTATAGCTTATAGACATTTGGGATTATTATAACCTGTATATAACCTG  
TGCCTGTTGTTTATTTATAGTTTTATAGACATTTGGGATTATTATAACCTGTATATAACCTG  
TATTTGTACATATACATGTATTTTATATGTGGCTGTGGTAATACGTGTATTGTATACATG  
GCCATACAATTTGTGCATGTGTTTTTAAAGTTCTACCACTTTTTTTTGTTTTTTTTGTTGTT  
CCTTTGTTTTTACAGTTCAATAAAGCAACCATGGTGGCACATCGTGCAAGGCGTCGCAAG  
CGTGCATCCGCCACAGAGCTTTATAAAACCTGCAAAGTTGCAGGCACATGCCCCCTGAT  
GTTATTCCAAAAGTTGAGGGCACCACTGGCCGACAGGATATTGCAATGGGGCAGTCTA  
GGTGTCTATTTGGGTGGGTAGGTATCGGTACTGGGTCTGGCACTGGAGGTCGCACAGGT  
TATGTCCCTGTCCGCACTCGGCCAGGCACTGTTGTGGATGTTAGTATTCCTACGCGGCCT  
CCTGTGGTTATTGAGCCTGTGGGCCCTTCTGATCCTTCTATTGTTACCTGTTAGAAGAA  
TCCAGTGTAATTAATTCGGGTGCTACCATACCACCTTTACTGGTACATCCGGGTTTGAG  
ATAACATCATCTGCCACAACCTACCCCGGCTGTGTTAGATATAACCCCTGCTGGTGACAAT  
GTAGTCATTACTAGCACAACTTTAATAATCCTTTATTACCGAGCCTTCACTCTTGGA  
ATTCCACAACTGGAGAACTTCTGGACGTGTCCTGGTGGGCACACCCACCTCGGGTGTC  
CACGGGTATGAAGAAATACCCATGGACACGTTTGCCACCTCTGGAACCTGGGTTAGAGCCT  
ATTAGCAGCACTCCCGTCCCTGGTGTGACGAGGTTGCAGGTCCCCGCTCTATGGCAAG  
GCCCTAACACAGGTTAGGGTGTCTGATCCTGCGTTTTTGGTACTCAGCCTTCTTCGTTTGTA  
ACCTTTGATAATCCTGTGTATGATCCTGAGGATGAACTATTATTTTTGAGCGTCCTTCT  
CCCGGCACTCGTGTGCCTGATCCCGATTTTATGGATATTGTTAAGCTGCATAGGCCCGCA  
TTAACATCTCGCAGGGGCACGGTGCGCTTCAGTCGCGTTGGTCAGAAAGTTTAGCATGCGC  
ACTCGCAGTGGCACAAACATAGGTGCCAGGGTTCACTATTATCATGACCTGAGTCCCAT  
CTTCCACCCGAGGACATAGAGTTGGAACCACTGCTCCCCCTGCAGATCCCACTGCTGAG  
GAGTCTCTGTATGATATATATGCTGATGTGGACGAGGCTGACATGGCTTTTACAGGCGGT  
GGTCGCGGCGCCACCACCTTACGGGGGTGCGATTACTCCATCTGTATTTTCTCCACACTG  
TCTACGAGGTATGGCAATGTCACTATTCCATTCGTGTCGCCAGTTGATGTGCCTTTACAC  
ACGGGCCCTGATATTATTCTGCCCTCCTCTGCACAATGGCCTTTTGTTCCTGTAGCACCC  
GCAGACACGACACATTATGTGTACATTGATGGAGGGGATTATTTTTTGTGGCCTGTTACC  
TTTCTGTGTCCCGAAAACGTCGCCGTAAACGTCCTTCATATTTTCTTGAGATGGCTTT  
GTGGCGCTCTAGTGACAACCTGGTGTAACCTGCCCTCCACCCAGTCTCAAAAGTTATCAG  
CACGGACGACTATGTGACACGACACAATAATTTATTATTATGCAGGCAGTTCTCGCCTGCT  
CACTGTGGGTATCCACATTATTCAATTCCCAAATCCTCTGGTAATAAGTAGATGTGCC  
TAAGGTGTCTGCATTTTCAGTACAGGGTTTTCCGTGTGCGTTTTGCTGACCTAATAAGTT  
TGGTTTGCCCGATGCCCGCATATATAACCCCTGAGGCAGAACGTTTGGTGTGGGCCTGCAC  
TGGTGTGGAGGTAGGTGAGGGCAACCTCTCGGTGTGCGGTTGAGTGGACACCCCTCTGTA  
TAACAAACTGAATGACACAGAAAACCTCTAATATTGCACATGCTGAAAATGGTCAGGATTC  
CAGGGACAACATTGCTGTTGACTATAAGCAAACACAACCTGTGCATTCTGGGCTGTACGCC

TCCCATGGGCGAACACTGGGGTAAGGGCACTGTGTGTGCACGCACTAGTTCCGCTGCTGG  
TGATTGCCCCCCTGGAGTTAATGACCACACATATTGAGGATGGCGATATGGTGGATAC  
CGGGTACGGTGCCATGGACTTTGCTGCTCTGCAAGTTAATAAGTCTGATGTGCCCTTGA  
TATTTGCCAGTCTACGTGTAAATATCCTGACTACTTAGGCATGGCTGCTGACCCCTATGG  
CGACAGCATGTTTTTTTTTCTGCGTAGGGAACAACGTGTTGCCAGGCACTTCTTTAATCG  
TGCTGGTGTAGTAGGGGACAAAATCCCAGATTCCCTGTACTTAAAGGGTAACAACGGGGC  
AGAAACTCCTGGCAGTGCCATATACAGTCCCACACCTAGTGGGTCCATGGTAACGTCTGA  
GGCTCAAATATTTAATAAGCCTTACTGGCTACAGCAGGCCAGGGACACAACAATGGTAT  
ATGCTGGGCCAATCAGGTATTTTTAACTGTGGTGGACACCACACGCAACCAATATGTC  
GTTGTGTGCTACCACAGAGTCTCAACCGTTGACCACCTTATGATGCTACCAAGATTAAAGA  
ATATTTGAGACATGGGGAGGAATATGATTTGCAGTTTATTTTCCAGTTGTGTAAAGTTAC  
ATTGACACCTGAAATTATGGCTTACCTTCATACTATGAACAGTGCCTTACTTGAAGACTG  
GAATTTTGGATTGACATTGCCACCTTCCACTAGCTTGGGAAGACACGTATAGGTTTGTAAAC  
ATCCTCTGCCATAACTTGTCAAAAAGATTGCGCCCTACAGAAAAGCAGGATCCGTATGC  
AAAGCTAAATTTCTGGGATGTAGATTTAAAGGATAGATTTACCCTGGATTGTGCACAGTT  
TCCCCTGGGACGTAAATTTTTATTACAGATCGGTGCGCGCCGGCGTTCAAGTAGTCCCCTC  
CAGAAAGCGCCGAACGACCACCACGGCCCCCACCCTGCAAAGCGAAAACGCTCGAAAAA  
GTAACCCAGTGTGTGTGTGTGTGTATGTTGTGTAAATGTAATGTGTGTATGTATTTATT  
ACCATATGTGTTTGTATGTCTGTATGTCTGTACAATGTATGTATGTATATACTTCAACTATG  
TATGTGTGGATGTATAAAATAAAGTATGTCTACATAGTTTTTATATTTTATACATATAATTGT  
TTGCTGAGTAAGAAGTTAAGGTATAGGTACAGGGGACCGATTTCGGTCTAAAATGGCCGCC  
GGTGCAGGTGTGCACACCCTAATTACTCATATTATTCAATTTCTGCGACATGCCGTCT  
CACGCACAGTTTTTGGCAGCAATTTTTTGGCTTCCACTGTTTTATTTTACTGCTGTATCATT  
CTTCTTGGCAAGTTTGCACATATACATTGCAAATTCGCTGCTTCTGGGCACCAACTTATT  
ATGACTACTTTCACATAATTACTGTCTTGGCCCAGTTTTCTAAGTTATCTTGCCAATAAA  
ACGTGTTTGCAAATCTCCACCTTAACAATGTGTTTCCATGACACACCTAATCCGGTCGCT  
GCTTGCTTTCTAACCTTAATTAATGCAGCTGCCACACCTGTCTTTCTAACTATAAT

>gi|1020202|gb|U31783.1|HPU31783\_HumanPapillomavirus\_type\_28,\_complete\_genome

TAAATAATAATGAACAGAAGCAAAAGTAGGGAGGGACCGAAAACGGTACGACCGAATGGG  
GTACATATAAAAAGAGGCTTACATTGAATGGCAGAAGCTCAATGGATGACCAACGGCCTA  
AAAACATATTCCTATTGTGCAGAGACAGTGGAATATCATTTGATGACCTCCGTTTGCCT  
GCATATTCTGCGCCAAAGTGCTGACCACAGCGGAGCTATCAGCATTTGCATTAAGAGAAC  
TAAATGTGGTGTGGAGAACGGGAGCGCCCTATGGTGCCTGTGCCCCGTGTTTACTACTGC  
AGGGCATTGTGCGACGCCTGAAGCACTGGGACTATTCAATTGTATGTGGAAGGCGTGGAAG  
AGGAGACAAAACAATCTATAGATACACAGCAAGTGAGATGCTACATGTGTACAAACCAC  
TGGTTAAAGAAGAAAAGGACAGACACAGGAACGAACGGCGACGACTGCACTGCATAGCTG  
GCTACTGGAGAGGGAGCTGTCAATACTGCTGGTTAAGATGCACGGTCCGCATCCCACAGT  
AAAAGATATAGAATTGAGTCTTGCACCAGAGGACGTCCCAGTGCAATGCAATGTGCAATT  
AGATGAAGAAGATTATACAAATGTGGAGGAACCAGCACACAAGCGTATAGGGTGGTAAC  
ACTGTGTCCAAAGTGTTAGTTTCAACCTGCGACTGGTGGTAGAGTGACGCCACGCAGATAT  
AAGGGCATTGGAGCAGCTCCTGTTGGGCACACTGACGGTCGTGTGCCCTCGCTGCGTGTA  
ACTGGACATGGATGATACTTCAGGTACAGAGGGGGACGAATGTTTCAAGATTGGAACGGGC  
TGGGGGATGGTTTATGGTAGAGGCCATAGTAGACAGGCGGACGGGCGATAAGCCATCTAG  
TGATGAGGATGAGGACGAGGATGCAGACGAAGGGGAAGATTTTGTAGATTTTATAGATGA  
CAGGCCTGTAGGGGATGGACAGGAAGTGGCACAGGAACGTGTTGCTGCAGCAAGCAGCTGC  
AGATGATGATGTAGCAGTTTCAAGCTGTAAAACGAAAGTTTGTCTCCAGTCCGTATTTTCA  
TCCTGTGTGTATGCAACCCAGCATAGAAAATGAACTCAGTCCGAGGCTAGATGCCATAAA  
GCTGGGGGAGACAGTCTGGGGACAGCCAAACGCCGGCTATTCCAGCTACCGGACAGTGGGTA  
TGGCCAAACACAGTGGGATCGGAATCGGGACCCTGCAGGTACAGGACATTTGTGAGAC  
GGGGACACAAGATGGCGCCAGGACGCGGATGAGGGGAGCGGTAGGAATGTGGGGGGAAA  
TGGCGGCCAGGAGGAGGAGCGTGCAGGAGGGGATGGGGAGGAATCGCAGACTCAGGGTGT  
ACAAACAGACAAGGCAGCCTGTGGAGTGTGGCAATATTAAGAGCTAGCAATCAAAAAGC  
TACGCTACTCGGTAAGTTCAAAGAACAATTTGGGTTGGGATTTAATGAACTTATCCGACA  
CTTCAAAAAGTAGCAAAACCGTTTGCCTAGATTGGGTGGTATGCGTGTGTTGGGGTATACTG  
TACATTGGCAGAGGGCATTAACCAATTGATACAGCCTCAGTGTGACTATGCACACATACA

GGTGCTGTCCTGCCAATGGGGGATGACAGTGCTGATGCTGGTACGGTACAAACGTGCCAA  
AAACAGAGAAACTGTGGCTAAAGGATTAAGCACATTACTAAATGTGCCAGAGAGCCACAT  
GTTGATAGAACCACCTAAACTAAGAAGCGGCCAGCAGCGCTGTATTGGTATAAGACAGC  
CATGTCAAACCTGTAGTGATGTGTATGGGGAAACACCAGAGTGGATAGTGAGACAAACGAT  
GGTTGGACATGCACTAGAGGAAGCACAGTTTAGTCTGTCTCGGAGATGGTACAGTATGCATA  
CGACCATGACATTACAGATGAGAGCATGCTGGCATTGTAATATGCACTACTAGCAGATAC  
AGATGCCAATGCAGCCGCTTCCTAAGTAGCAATTGTCAGGCCAAAATATGTAAAGGACGC  
TTGCACAATGTGCAGACACTACAAAAGAGGTGAACAGGCGCGCATGAACATGTCAGAATG  
GATATGGTTTCAGAGGTGATAAAGTACAGGGCGATGGGGACTGGAAACCCATAGTACAATT  
TTTAAGATATCACGATGTGGAATTTATACCATTCTCTGTGTGCCTTTAAAAACCTTCCTGCA  
AGGAATTCCAAAAAAAGTTGTTTTAGTGTTCTATGGTCCAGCAGATACAGGAAAGTCATA  
TTTCTGCATGAGTCTATTAAAGATTTCTAGGTGGGGTGGTAATATCTTATGCCAATTCAAA  
CAGCCATTTTTGGTTGCAACCGTTAGCTGATGCCAAAATAGGGTTGCTAGACGATGCCAC  
CAGCCAGTGCTGGTGCTACATAGATACGTATTTAAGAAATGCATTAGATGGAAACCAGGT  
TTGCATAGACAGGAAGCATAGAGCACTGCTACAGCTGAAATGTCTCTCTCTATTAATAAC  
AACAAATATAAATCCACTAGAGGATGACAGATGGAAGTATCTGCGCAGCAGAGTACAAC  
GTTTACATTCAAAAACAAATTTCCATTAACAACACAAGGAGAACCCTGTATACACTTAA  
TGATCAAAATTGGAATGCTTTTTTCGAAGTTGTGGGCACGTTTAAGCCTTACCGATCC  
TGACGACGAGGAGGAAAAATGGAACCCCTAGCGAACCGTTTAGATGTGTGCCAGGACAAAA  
TGCTAGAACTTTATGAAAAGATAGCAACAACTTGAGGACCAGATAAATGCATTGGCAAT  
TGATGCGTGTAGAAAATGCTTTGTCTGTACAAAGCAAGGGAATGTGGATTGACACATATTG  
GCCATCAGGTGGTGCCACCTCTTAGTGTAACATAAGCTAAGGCACGCAGTGCCATTGAAG  
TGCATGTAGCTTTGCTACAATTACAAGAAAAGTGCATATGCACAAGACTCATGGACACTGC  
GAGACACATCACGAGAAATGTGGGACACAGTACCCAAGAAGTGCTGGAAAAAAGAGGTG  
TAACCGTGGAAGTTAGATATGATGGAGACGAAACCAAATCCATGTGTTATGTACACTGGA  
GAGACATATTTACTCAGAACTATAGTGATGATAAATGGGTAAAGGTGGCAGGACACGTGT  
CATATGAGGGACTGTATTACATACACGAAGGAGAACAACATTTTATGTCAAATTCAAAG  
ATGACGCGTACGTGTATGGGGAAACAGGAAAATGGGAGGTACATGTGGGAGGCAAAGTAA  
TTCACCACCATGCATTTGACCCCGTATCTAGCACACGAGAAATACCCGCTGCTGGACCTT  
TGTGCACCGGTGACACCACCAAGGCGTCGACCGAAACCTCGGTGGGCGCGACCGAAGGAC  
CGCAGCAAAAACGACAGCGACTCGAGACACTCAACTGGGAGCAGCAGCAGCGACAGTACC  
CCCAAACCCCTCCACGCAAACCACTGAACGAGCAAGTCAACCACTGGACGTTACAAGGA  
CCAGCGACTGTGACACTACATGTCCATACACCGTCGGGCACCAAGTGACCCTGACTGTG  
CACCTGTAGTACACCTAAAAGGTGATCCTAATTGCTTGAAATGTTTTAGATATAGGTTAC  
ACAAAGGGAAAAAGAAAAGTGTATTGTAAAACCTCTTCCACATGGCGGTGGAGCTGTGAAT  
CAGAAAATCAAGCAGCTTTTGTAACTATTTGGTATACAAGTTATTCACAGCGTAATGAAT  
TCTTGTCCACTGTAAAGGTACCACCTGGTATACAGGTAATATTGGGACATATGTCAATGT  
TTGTATAATTATCGAACCGTGTGGTGATACAGTGTGCAGACTGGATACTTATTTGTGCAG  
GCTACATTTTTTGGGCTTATTTTTGTGTGCTGCTGTGTTTCGTTTTGGCTGTGTGTGCTTCC  
TGCGCTACCTTGCTATCTGGCAATTGTGCTGTGTTTGTACCTGGGCTGGTAGCATTATA  
TTTGCGAATTGTATCACATATTGTACAAATCAATACATAAGCCTTGCTATGTATCCTTTG  
GTGCTAAGGGACAACAATGGCGATCATACTGTCTGTTTCTGGAGCCAGATGACGTGTAT  
CTATTGTTGTTGTTTATATTTTTTGTATATACTTGCATTGTTTATCTTGTATAGACATTTG  
GGTTTTTTGTAACGTGTGTAGTTGTGTGTAGTTGGTCACCACAATGTATTTTTTAAGTACT  
GTGTATATCCCAGTGTGCTATTGAGCCACTGCCTTTTCTACACTTGTTTTTTTTTTTTTAC  
AGTTCAATAAAGCAACCATGGTGGCACATCGTGCAAGGCGTCGCAAGCGTGCATCCGCCA  
CACAGCTTTATAGGACCTGCAAGGCCGACGGCACATGCCCCCTGATGTTATTCCAAAAG  
TGGAGGGCCTACTCTGGCAGATCGTATTTTGCAAGTGGGGCGGGCTGGGTATTTATTTGG  
GGGATCTGGGGATTGTTGTTACCGATCTGGGACAGGGGGTGCACAGGGATATGTTCTCTTA  
GCACACCGGCTGGGACTGTTGTTGATGTTAGTGTCCCTGCTAGGCCTCCTGTGGTAATTG  
AACCTGTAGGACCATCTGACCCCTCCATTGTAACTTATTGGAGGACTCCAGTATTATCA  
ATTCGGGTTCCACCGTTCCAACCTTTTTCTGGTACTGGTGGCTTTGAGGTGACTTCTTCAG  
CCACAACCTACCCCTGCTGTGTTGGACATCACCCCTGCCACTGACAATGTGGTCATTAGTA  
GTTCCAACCTTTACCAACCCTGCCTTTACTGAACCTCGTTGTTAGAGGTTCCCCAAAATG  
GTGAAGTGTCTGGGACACATTCTTGTTAGTACCCCCACGGCTGGTACACATAGTTATGAAG

AAATACCTATGGAGACATTTGCTTCGCCAGGTACTGGCAATGAACCTATTAGTAGCACCC  
CTGTACCTGGTGTAAAGTAGGATCGCTGGACCCCGTCTATATGCCAAAGCTGTCACACAGG  
TTAAAGTAACAGATCCTGCTTTCTTGTCTCGTCCCACCTCATTGGTTACTTTTGACAATC  
CTGCATTTGAGCCGGGGGATGAAACTATTATATTTGAACGCCCATACCCCTCCCTCACAAG  
TGCCTGACCCAGATTTTATGGACATCATACGTTTGCATAGGCCTGCCTTAACATCTCGCA  
GGGGTACTGTGCGTTTCAGTCGCCTCGGTACAAAACCTTAGCATGCACACTCGCAGTGGCA  
AGGGTATAGGAGCTAGGGTACATTATTATCAGGACCTAAGCCCTATAGGCCCCACGGAAG  
ACATTGAAAATGGAGCCTTTGCTTGCTCCTGCTGAAAACGCTGCTGGGGATTCTATTTATG  
ATGTGTTTTCGGACGTGGAGGACGCTGACATAGCTTTTACTGGTAGAAGTCGCAGCGCCA  
CGTCATCTCGGGGATACACTACGGTGTCCCCACTGTCTTCCACACTAACTACCAAGTATG  
GCAATGTCACCATTTCCCTTTGTGTCTCCTGTGGATGTGCACTTACACCCCTGGGCCTGATA  
TTATAACGCCTGCGTCTACGCAGTGGCCGTTTGTGCCCTTGTTTCTGCTGACACAACCC  
ATTATGTGTACATAGATGGCGGGGATTTTATTTATGGCCTGTTACCCTGTTTGTACCCC  
GACGTCGTGCGCGTAAACGTCTCTCATATTTTCTTGACAGATGGCACTGTGGCGCTCTAGT  
GACAACCTGGTGTACCTGCCTCCCACCCCTGTTTCCAAAGTTCTCAGCACGGACGACTAT  
GTGACACGCACCAATATTTATTATTATGCAGGCACTTCTCGGTTGCTGACCGTGGGTTCAT  
CCTTATTTTCCCATTCCTAAATCATCCACTAACAAAGCAGATGTGCCCAAAGTGTCCGCC  
TTTCAGTATAGGGTATTTCCGGGTGCGGTTGCCTGACCCAAATAAGTTTGGCCTGCCAGAT  
GCACGATATATAACCTTATGCAGAAAGACTGGTCTGGGCTTGCACTGGGGTTGAGGTA  
GGCCGCGGGCAGCCTTTGGGTGTCGGCCTCAGTGGACATCCTCTCTATAACAAGCTAGAT  
GACACTGAAAACCTTAACATAGCACATGGGGACATTGGACAGGATTCCCGAGACAACATA  
TCTCTTGATAATAAGCAGACGCAGCTATGTATTGTTGGTTGCACCCCTCCAATGGGGGAG  
CATTGGGGCAAGGGGACCCCATGTCTGTCAAAATACACAACAGGGAGATTGCCCTCCGTTG  
GAGCTTATAACTGCCCTATTACAGGATGGTGATATGGTGGACACTGGCTTTGGTGCAATG  
GACTTTGCTGTATTACAGGCCAATAAATCGGACGTGCCCTTAGATATTTGCCAGTCCACT  
TGCAAATATCCTGATTATTTAGGCATGGCCGCGGAGCCGTATGGCGACAGCATGTTTTTT  
TACTTGCGAAAGGAACAACTTTTCGCTCGGCATTTTTTTAATAGAGCTGGTGTGCTGGG  
GACACCATTCCTGAAACATTGTATATTAAAGTTCAGGGCAACGGGAGGGATGTGATTGGT  
AGTGCTGTGTATAGTCCTACACCTAGTGGATCTATGATCTCCTCTGAGGCCAGCTTTTC  
AATAAGCCATATTGGCTGCGGCGTGCTCAGGGACACAATAATGGTATCTGTTGGGCCAAC  
CAATTGTTTGTAACGTAGTGGATACTACACGCAGTACAAACATGACGTTGTGTGTTTCT  
ACTGACTCTTCAGCTACGTACGATGCTAGTAAATTTAAGGAATACTTAAGGCACGGGGAG  
GAGTACGATTTGCAGTTTATATTCCAGTTGTGTAAAGTAACCTTGACCCCTGATATTATG  
GCATATTTACATACCATGAACAATAGTTTATTGGAGGACTGGAACCTTGGGTTGACTTTA  
CCACCATCCACTAGCTTGGAGGACACGTATAGGTTTCATATCTTCTCTGCCATTACCTGT  
CAAAAGGATGCTTCCCCCACTACCAAGGAAGACCCTTACGCTAAACTAACTTTTGGGAA  
GTGGATCTTAAGGATCGCTTTTCTCTTGATCTATCGCAATTCCCTCTGGGAAGGAAATTT  
TTAATGCAGTTGGGTGTAGGTGCCCCGCTCCAGTGTCTCCGTTTCGCAAACGTCCAGCGTCC  
ACCACGAGAGGATCGTCTGCTGCAAAAACGAAACGCGCCAAAAAGTAGCACTACTGTGTT  
TTGTATGTTTGCTGTTGTTGTCTGTGTGTCAGTGTATGGGCGTCCCTGATATGTGTTT  
GTACAAAGTATGGTGTATGTATTTGTGTATGCATGTAATGTGGTTATAACTGTGTTTGT  
ATGTTTGCCTGTTGTTGTCTGTGTGTCAGTGTGTGGGCGTCTGCTATGTGCTTGTACA  
AAGTATGGTGTATGTATTTGTGTATGCATGTAATGTGGTTATAAGTTATCATAATAAACT  
GTGTCACATAGTTTTATATTTTTTAATTTCTGTAATTGCTGATCCTGTGAGTAAGAAAGG  
TGGTTCCAGGTCAAGCGACCGATATCGGTATCCAAAATGGCCGCTATGCAGGTGTGTTT  
CAGGTGTGCTTAATACCAATTAGTCATACAGATCCATATCCTGCAAACCTGCCCTGTCTC  
GCAAGTTTTTGGCTGTGATACTATCTTCTATAGTTTATTTTCAATTTGCTGTATCATTCTT  
TCTGGCACGTCAAAATGTCTCCATTGCAAAATTAACCTGCTCCTGGGCACCAACTTATTATG  
ACTACTTTACATAAATTAATCTTGGCTGGGTTTTATAGGTTGCCTTGCCAAATAGAATG  
TGCTTCCAAATCTCCACCAAGACACACCTAATCCGGTCGCTGCTTGCTTTCTAGCCATAA  
ATTAAGCAGTTGCTACACGTTTCTTTCCAACATAATTA

>gi|1020186|gb|U31781.1|HPU31781\_Human\_papillomavirus\_type\_23,\_complete\_genome  
AGCAGATACCATCAGCACCTGGAGCGACCGCCAAGACTTCGCCAACTTGGCAGAACATTT  
GTTGGCAAGAAAAGAGCACCGATAACGGTAAGAAGCTTTTATTTTTTGGACCGTAGGCGTTC  
ATTTACTAACCTTGGCAACAATTGTGGTTAACAACAATCATAAGCCAATAATACATGCAA

CCGCTTGTGGTAATTTATTATGCAGACTGTGCATTATTTAAGTAGGATGTGCTACACCAA  
ATTATTGATGGACTCGACGCGACCACTGACGGTACAGCAACTTAGTGATAAGTTGACAGT  
ACCAGTGGTAGATCTCTTGCTACCTTGCAGATTTTGTCTAGGTTTCTTACCTATTTAGA  
GTTGCGAGAATTTGATTATAAACATTTGCAGTTAATCTGGACAGAAGAAGATTTTGTATT  
TGCATGCTGCAGTGGCTGTGCTTATGCTTCTGCTCAATTTGAAATTCACAATTTTATCA  
GCTAACTGTGTATGGTCGTGAAATTGAGCAGGAGGAGCAACGACCTATAGGCCAAATTTG  
TATTAGGTGTCAGTATTGTTTGAAGTCTCTCGATTTGATAGAAAAGCTAGATATCTGTAG  
TTTTAATCAACCATTTCAACAAGGTTAGAAAATCATTGGAAGGGAAGGTGCAGGCATTGTAA  
GGAAATAGAATGATTGGGAAACAAGCTACTCTTCGTGATATAGTTCTTGAAGAGCTTGTC  
CAGCCCATTTGACCTGCATTGCCACGAGGAGCTCACTGAAGAGGTAGAAGAAGCAGTCGTA  
GAGGAGGAGCCTGAATACACTCCTTACAAGATCATCGTAGTTTGTGGAGGCTGTGAGACA  
CAGTTAAAGCTTTACGTGCTAGCCACAGATTTTGGAAATTCGCTCGTTCCAAGCATCTTTG  
CTAGAAAACGTGAAGCTGGTGTGTCTGCTGTCGAGAAGACATTCGCAATGGACGACGA  
TAAAGGTACTGATACTGCTAAAGAAGGCTGTAGTACTTGGTGCTTATTAGAGGCTGCTTG  
TTCTGATGATAGTGACCTAGATGATAGTTTGGAGAAATTATTTGAAGAGAATGCAGAGTC  
AGATGTGTCTGATTTAATAAATGATGATGATAATGCTGCTCAGGGAAATTTCCGCGAATT  
GCTATGTCAACAGGAGAGTGAGGAATGCGAGCAGCAAATACAATACCTAAAACGAAAGTA  
TAATATCAGTCCAGAGGCTGTTTACGAGCTTAGTCCACGTCTACAGTCTTTGAATTTGTC  
GCCTGGGCATAAATCTAAAAGGAGATTGTTTGTGGAGCAAGACAGCGGACTGGAGTTATC  
TCTAAATGAAGTTGAAGATTTTACTCAAGAGTTGGAGGTACCGGCGAGCGCTCCAGGGCC  
GGCAGCCAGGGTGGAGTAGGGCTGGGACATATTGAAAGTTTGTAAAGATGTAAAAATGC  
TAAAGCAGTGTTGCTACATAAATTTAAGGAAGGTTTTTGAATTAGTTATAATGAGCTTAC  
CAGACAGTTTTAAAAGCAATAAGACCTGCTGTAAACATTGGGTATTGGCCATATATGGTGC  
AAAAGAAGAGCTCATAGATGCGTCTAAGCAATTGTTACAACAGCACTGTTCTTATATTTG  
GTTGCAGACATACACACCTATGTCACTTTATTTATGTTGCTTTAATGTTGCAAAAAGTAG  
AGAAACAGTTGTAAAATTATTGATTTCTATGCTGCAAATACATGAAAATCATATATTATC  
AGAACCTCCGAAAAACAGAAGTGTACCTGTAGCTTTATTTTGGTATAAAAGGCAGTATGAA  
CCCTAATGTATATGCATTTGGTGAGTATCCTGAGTGGATTGTGACACAAACCATGATACA  
ACATCAAACCTGCTGACAGTATACAATTTGATTTGTCTCGTATGATTCAATGGGCCTACGA  
TAATGATCATCTTGACGAATGTAGTATTGCTTATAACTATGCAAAATTGGCTGACACAGA  
CAGCAATGCAAGAGCTTTTTTtagctcaaaaatagccaagcaaaacatgtaagagattgtgc  
acagatgggttaagcattataaaaagaggtgaaatgcgagaaatgactatTTCTGCATGGGT  
ACATCATTGCATATCTAGAATTGAAGGTGATGGACAATGGCAAGATATTGTTAAATTTTT  
GCGCTATCAGGGATTAAACTTCATTGTATTTTTAGATAAATTTAGAACGTTTTTACAGAA  
TTTTCCAAAAAAAATTGTTTGTAAATATATGGGCCTCCAGACACAGGCAAATCAATGTT  
TACTATGTCTTTAATGAAAGCACTAAGAGGTCAAGTAATATCGTTTGCAAAATCTAAAAG  
CCAATTTTGGCTGCAACCATTAGCTGATGCAAAGATCGCCTTATTAGATGATGCAACAGA  
AGTTTGTGGCAATATATTGATATGTTTCTTCGAAATGGATTGGATGGTAATGTAGTGTC  
GTTGGATATGAAACATAGAGCACCATGTCAAATGAAATTTCCACCATTAATTATTACATC  
TAATATTAGCCTTAAGAAAGAAAAGAAGTTTCCTTACTTGCATAGTAGAATATATGAATT  
TGAATTTCCAAACAGATTTCCATTTGATTCAGATGATAAACCTTTGTTTAACTTACTGA  
CCAAAGCTGGGCGTCTTTTTTTAAAAGGCTTTGGATACAATTAGGACTCAGTGACCAAGA  
GGACGAGGGAGAGGATGGAAGCACTCAGCGAACGTTTCAGTGCCTACAAGACAAGTTAA  
TGGACCTGTATGAATCAGGTTTtagaggatCTTgaaactCAAATACAGCATTTGGAACTCT  
TAAGACAAGAACAATTTTATTGTATTATGCTCGAAAACGTGGAATTATGCGTTTGGGGT  
ACCAGCCGGTACCTCCTCTGGCAACATCAGAAATTAAGCAAAAGATGCTATAGCAATTG  
GAATTTTGCTGGAAAGTTTACAAAAATCCAAATATGCAGATGAGCCATGGACATTAGTTG  
AGACTAGCTTGGAGACATATTAGAAGTCCACCAGTAGATTGCTTTAAAAGGGACCTAAAA  
CAGTGGAGGTGTATTTTtaggagatCCCTGAAAATGTTATGCCATATACAGTATGGTCTT  
ATATTTACTATCAAACCTGATGAGGACACTTGGGAAAAGGTTGAAGGACATGTGGATTATA  
CAGGAGTCTATTTTATGAGGGCCAACCTTAAAAACTATTACATTAAATTTGAAGCAGATG  
CAAAGCGCTTTGGTACTACAGGAATGTGGGAAGTACATGTTAATAAAGATACTGTCTTTA  
CCCCTGTTACTAGTTCTACGCCGCCAGTTGGAGACGCCTCCAACAACGCCGTTCCCGAAG  
CATCTACCACCTCCTTGCTCTCCCCACAACGGTCAACCATCCACCAACCGCCGATACGGCC  
GAAAAGCATCTAGCCCTACAGCCACCACCAGGAGGCAAAAAGACAAGGAAAAGAAACCC



TCACCAGGCGAAGAAAAACCAGATCAAGGTCCCGGAGCAGAGAGCAACGGGGGGGGAGGG  
AAACCCAAAGATCCTCCTCCAGAGGAGCCTCAAAATCCCCCGGCGGGGAGGGAGAAGTG  
GAGGGGGGCCCCCTACCCGCTCCAGATCAAGATCCAGATCACCAGAGTCTGTTACAGGGG  
GTGGCGTTGCACCTAGTGAAGTGGGAGCGTCACTTCGATCAGTTAGTAGACACAGTAGTG  
GAAGACTTGCGCAACTATTGGATGCAGCTAAAGACCCCCCAGTAATATTGCTGCGCGGCG  
GTGCAAATACATTAAAATGCTATCGCTATAGGTTTGTAGAAAAAGCATGCTGGTAAATTTT  
ATTATGTTAGCACACGTTGGTCATGGATTGGGGGTCATTCTACTGATAGAGTAGGGCGTG  
CAAGGATGTTAATAGCATTTTCATTCTAATCATGAAAGGGAAAAATGTATTCAAGAAATGA  
AGTTACCTTTTAGGAGTAGATTGGTCCCTATGGACAATTTGATGATTTATAACCTGCTTTTT  
ATTTAAACACACTAACATTGCCTATTGCTATTTTTTTTACTAACTTATATTGCTATATTGCT  
ACTAACATTATGGTACGGGCGCAAAGAACTAAGCGAGCGTCTGTTACTGATATATACAAA  
GGCTGTAAAGCCTCTGGGACTTGTCCCCCTGATGTACTAAATAAAGTGGAACAAAATACA  
CTTGCTGATAAAATACTTAAATATGGCAGTGTGGTGTGTTTTTTGGTGGACTTGGAATT  
GGTACAGGTAAGGGTACCGGTGGTGCCACGGGGTACGTCCCATTGCGACCTGGAGTACGA  
GTGGGCGGTACTCCTACAGTGGTCCGCCCTGCAGTCATACCTGAAATAATTGGACCAACT  
GAATTAATACCAGTTGACTCAATAGCACCAATTGACCCCGAAGCACCATCAATAGTCTCA  
TTAACAGACAGTGGCGCAGCTGCTGACCTTTTCCCCAGTGAAGCAGAACTATTGCAGAG  
GTACATCCTACACCTGTAGACATAGGAATTGATACACCTATTGTAGCTGGAGGCCGTGAC  
GCCATTTTAGAGGTGGTAGTACTAATCCTCCAACAAGGTTTCAGTGTAACAAGAACACAA  
TATGATAATCCATCTTTTTCAAATAATTTTCAAGATCCACACCTATCACAGGTGAGGCATCC  
CTTGCTGATCATGTATTTGTGTTTGAAGGTTCTGGAGGTGAGCACGTAGGAGCGGTAAGT  
GAAGAGATTGAATTAGATACATATCCTTCCAGATATTCCTTTGAAATTGAGGAAGCTACA  
CCACCACGCAGAACTAGTACTCCCATTGAAAGAATAAGTCAGGAATTCAGGAACCTACGT  
AGAGCACTGTATAACAGGCGCTTAACAGAACAGGTTCAAGTAAAAAACCTTTATTTTTTA  
ACTACTCCATCTAAACTTGTAAGATTTCAATTTGATAATCCTGTGTTTGATGAAGAGGTC  
ACACAAATATTTGAAAGAGATGTTGCTGAAGTGAGGAACCTCCAGATAGGGACTTTTTTA  
GATATAGACAGATTAGGAAGACCATTATTAACAGAATCCACTGAAGGCCGTATTAGATTA  
AGTAGGTTAGGTCAAAGGGCTTCCATTCAAACACGCAGTGGAACACGTGTTGGTTCACGT  
GTACACTTCTATACAGATTTAAGCACTATTAATACAGAAGAACCTATAGAATTAGAATTA  
TTAGGCGAGCATTCTGGAGATGCATCAGTTATTGAGGAACCTCTGCAAAGCACTGTAATA  
GATATGAACTTAGATGATGTTGAGGCTATTCAGGATACTATAGATACTGCAGATGATTAT  
AACTCTGCAGATCTTTTTATTGGACAATGCAATTGAAGAATTTAATAATTCTCAATTAGTG  
TTTGGCACTTCTGATAGATCTTCGTCTGCATATTCTATACCACGGTTTGAATCCCCTAGA  
GAAACAATTGTATATGTTCAAGATATAGAAGGTAATCAGGTAATTTATCCTGGGCCACA  
GAAAGGCCAACTATAATATTTCCCTTACCTAGTGCCCCCTGCTGTAGTCATACACACATTG  
GACAAGTCTTTTGATTATTACTTACATCCCAGCTTAAGAAAGAAAAGGCGCAAACGCAA  
TATTTATAATGTTTTTCAGATGACCCTCTGGCTTCCAGCTTCTGGTAAGATATATTTACC  
TCCTACGCCACCTGTAGCCCCGAGTGCAGAGTACGGATGAATATGTGGAAAGAACTGACAT  
CTATTACCATGCAACTAGTGATCGATTACTAAGTGTAGGCCACCCATATTTTGATGTTAG  
ATCACCGGATGGTAGTAAATAGATGTACCAAAGGTTTCAGGGAATCAATTCAGGGCCTT  
TAGAGTTACATTTCCAGACCCTAATAAGTTTGCATTAGCAGACATGACTATCTATGATCC  
TGATAAATACAGGTTGGTGTGGGCCTGCGCAGGACTTGAAATCGGCCGCGGCCAACCTTT  
AGGGGTGCGCAGTACAGGACACCCGCTATTTAATAAGCTCCGTGATGCAGAAAATTCTAG  
TGAACGTCAGGAAGGTACTGTAGATGACAGAAGAAATATCTCATTTGATCCTAAGCAAGT  
ACAGATGTTTATAATTGGTTGCACACCGTGCTTAGGTGAATATTGGGATACAGCTCCTGT  
CTGTAAAGATGCAGGTAGCCAACTAGGGTGTGTCTCCTTTAGAATTAAAAACAGTGT  
TATAGAAGATGGGGACATGTTTCGACATTGGCTTTGGTAATATCAATAATAAACATTATC  
CTTTAATAGATCAGATGTTAGTTTAGATCTTGTAATGAGGTTTGCAAATATCCAGACTT  
TTTGACTATGTCAAATGATGTATATGGAGATGCCCTGTTTTTTTTGTGCCCGAAGAGAGCA  
ATGCTATGCCAGGCACTATTTTTGTTCGAGGCGGTGTAGTAGGAGATGCAATACCTGATGG  
TGCAGTTCAACAGGATCAAAATATTATTTACCTGCAGACCAACAAAACACTTTAGAAAA  
CTCACTTTATTTTCCTACTGTCAAGTGGATCTTTGGTAACCTCTGATTCTCAACTTTTTTA  
TAGACCATTTTGGTTAAAACGTGCTCAAGGCCATAACAATGGTATTTTATGGAACAACCA  
GATGTTTGTGACTGTAGCAGATAATACACGTAATACAACTTTAGTATCAGTGTTACCAA  
TGACAGCAGTTTAGAAAAGTATGATGCCACTAAAATTAGAGAGTTTACAAGACATGTTGA

AGAATACCAACTTTCTTTTATACTACAGTTGTGCAGGATACCTTTAAAGGCCGAGGTCTT  
AACACAAATTAATGCCATGAATTCAGATATTTTAGAGAATTGGCAGTTAGGGTTTGTTC  
TACACCAGATAATGCAGTTCATGACACATACAGATATTTGGCTTCAAAGGCCACAAAATG  
TCCAGATGCAGTACCTGACACGCAAAAAGAGGATCCTTTTGGAAAGTATTCATTTTGGAA  
TGTTGATATGACAGAAAAATTGTCTCTAGACCCTAGATCAATATCCCTTAGGCCGTAAGTT  
TCTGTTTTCAAATTGGAGTGCAGCGTGTACGGTCCGGTACCAAACGGCCTGCAACTCGAAA  
AGTGACCAAAACTGTCAAAAGGAAAAAGTGCAATTGTAACCGATATCGGTCGCCAATAA  
AATATGTTAACTAATCTGGTATGTGAAGTATTTTTTAACCGTCTTTGTGACTAAACCGAA  
CAAGTCAACACCAGCAACCGCACCCGTTTCCACATTATAAATTCCTCGAGGTAAGATTAT  
GATC

>gi|1020178|gb|U31780.1|HPU31780\_HumanPapillomavirus\_type\_22,\_complete\_genome

CCGCCAAAGCTTTGCCAGGTCTTGGCAGAACATTTGCTGGCAAAGACTGCACCGATAACG  
GTAAGAACTTTTAATTTTAAACCGTAGGCGGTATTTGTTATTCGTAGCAACAATTGTGG  
TTAACAACAATCTCCTGCCAGAATATACATGCAACCGCTTGTGGTAATTTATGCACTGCT  
TGCATATTATTTAAGTAGGATGGGCTGCTATTCTGTATTTCATGGCTTTGCAAAGACCACT  
GACAGTACAGCAACTTAGTGATAAGTTGACTGTACCTGTAGTAGATCTTTTGCTACCTTG  
TAGATTCTGCAGTAGGTTTTTAACCTATTTGGAATTGCGGCAATTTGATTATAAGAATTT  
GCAATTAATTTGGACAGACGAGGACTTTGTGTTTGCATGTTGCAGCGGCTGTGCCTACGC  
TTCAGCCCAATTTGAATTTTTCAGCAGTATTATCAAGTTTACTTTGTATGGTCGTGAAATTGA  
GCAAGAAGAACAACGACCTGTAGGCCAAATTTATATGAGATGTCAATATTGCTTGAAGTC  
TCTTGATTTGCTAGAAAAGTTAGATATCTGCTGTTCCAATCAACCATTTCACAAGGTTAG  
AGATCATTGGAAGGGAAGGTGCAGGCACTGTAAAGCAATAGAATGATTGGGAAACAAGCT  
ACTCTGTGTGATATAGTTCTTGAAGAGCTTGTCTGCCCATTGACCTGCATTGCCACGAG  
GAGCTGCCTGAACTTCCAGAAGAGTTAGAAGAATCAGTGGTAGAGGAGGAGCCTGAGTAC  
ACTCCTTACAAGATTGTAGTATATTGTGGGGGTTGTGATACAAAGCTGAAGCTGTATATA  
CTAGCAACTCTCTCTGGAATTCGCGACTTTCAAACATCTCTACTTGGACCTGTAAAACCTT  
TTGTGTCCCACCTGTGCGAGAAGAGATTTCGCAATGGACGACGATAAAGGTACTGACACAAC  
TGATGCTAAAGAAGGATGTAGTGGTTGGTTTATGTTAGAAGCTGCGTGCTCAGATGATAG  
TGACTTAGATAATAGTTTGGAAAAGTTATTTGAAGATGGTACAGAGTCAGATGTATCTGA  
TTTAATAAATGATGATGATACTGCTGCTCAGGGAAATTCCCGCGAATTGCTATGTCAACA  
GCAAAGTGAGGAATGTGAGCAGCAGATTCAATATCTAAAACGAAAGTATTTTCAGTCCAAA  
GGCTGTTTCAGCAGCTAAGTCCACGTCTGCAGTCTATGAATATTTTCGCCTGGGCATAAATC  
TAAAAGGAGATTATTTGTGGAGCACGACAGCGGACTGGAGTGTTCCCTAAATGAAGCTGA  
AGATCTTACTGAAGAGGTGGAGGTACCGGCGAGCGCTCCAGCGCCGGCAGCACAGGGTGG  
TGTAGGGTTCGGGACATTACACCAGTTTGTAAAGATGCAACAATGTAAAGGCAGTATTGCT  
GGGAAAATTTAAAGACGCATTTGGAGTGAGCTATAATGAGCTGACTAGACAATTTAGAAG  
TAATAAGACTTGCTGTAAGCATTGGGTATTGGCCATATATGCTGCTAAAGATGAATTAAT  
AGATGCGTCCAAACAATTGTTACAACAGCATTGTACCTATTTGTGGTTGCAAACATTCTC  
ACCCATGTCAATTATATTTATGTTGTTTAAATGTTGGGAAAAGTAGAGAACTGTGATGCG  
ATTGTTATCTTCCATGTTACAAGTTAATGAGAATCATATTTTATCAGAACCTCCAAAAAT  
CAGAAGTATGATAGCTGCTTTATTTTGGTATAAAGGTAGTATGAATCCAAATGTCTATGC  
ATTTGGAGAGTATCCTGAGTGGATTATGACACAGACTATGATACATCACCAAACTGCTGA  
CAGTGTACAATTTGACCTGTCTGAAATGATACAATGGGCTTATGATCAAGATTATGTTGA  
TGAATGTACTATTGCATACCAGTATGCTAGATTGGCTGATAGTAATAGTAATGCCAGAGC  
ATTTTTAGCTCATAATAGTCAAGCCAAATATGTTAGAGAATGTGCTCAAATGGTTAGATA  
TTATAAACGTGGAGAAATGCGAGATATGTCAATTTCTGCATGGATACATCATTGTATATC  
AAAGATAGAAGGCGATGGTCACTGGCAAGATATTGTTAAATTTTTCGATACCAAGGGTT  
AAATTTTATAGTGTTTTTGTAGATAAATTTAGAACATTTCTAAAAAATTTTCCAAAGAAAA  
TTGTTTGTTAATATGTGGTCTCCGGATACAGGAAAATCTATGTTTTCATGTCATTAAAT  
GAAAGCATTAAGAGGACAGGTAGTTTCATTATGCAAATTTCTAAAAGTCATTTTGGCTACA  
GCCTTTAGCAGATGCAAACTGGCTTTATTAGATGATGCTACAGAAGTTTGCTGGCAATA  
TATTGATGCTTTCTTAAAGAAATGGATTAGATGGTAACATGGTATCTTTAGATATGAAACA  
TAGAGCTCCATGTCAAATGAAATTTCCACCTCTTATTATAACATCTAACATTAGTTTAAA  
AAAAGAAAAAAATTTCCCTATTTACATAGTAGAATATATGAATTTGAGTTTCCTAACAA  
ATTTCCCTTTGACGCAATGATACACCTCTGTTTAAACTTACTGACCAAAGCTGGGCGTC

TTTTTTTTAAAAGGCTTTGGACACAATTAGAACTGAGTGATCAAGAAGAAGAGGGAGAAAA  
TGGAGAAACTCAGCGAACGTTTTAGTGCACCTACAAGAGAAGTTAATGGACTTATATGAAT  
CAGGTGTAGAGGATCTTGAACCCCAAATTCAACATTGGAAATTATTAAGACAAGAACAAG  
TGTTATTTTATTATGCAAGGAGACATGGGATATTGCGTTTGGGGTACCAACCAGTACCCA  
CTCTGGCAACTTCAGAGAGTAAAGCAAAAGATGCTATAGCCATGGGACTATTGCTGGAAA  
GCTTACAAAAATCACAATATGCAGAGGAACCGTGGACCTTAGTAGAACTAGTTTGGAGA  
CAGTTAAAAGCCCTCCAGCAGACTGTTTTAAAAAAGGACCTAAATCTGTGGAAGTGTACT  
TTGATGGAGATCCTGAAAATGTAATGTCTTATACAGTGTGGTCATACATTTATTATCAGA  
CTGATGATGAGTCATGGGAAAAGGTGGAAGGTCATGTGGACTATACAGGAGCTTACTATA  
TAGAAGGGACCTTTAAAACCTATTATATTAAATTTGAAACAGATGCTAAACGATATGGTA  
CAACAGGACATTGGGAGGTGCATGTTAATAAAGATACTGTGTTTACCCCTGTTACCAGTT  
CTACGCCGCCAGTTGGAGTGCCTCCCAGAACTCCGCACCCGAACCGGCATCCACCTCCG  
ACTCCCCACAACGGTCATCACAAGTCACCCACCGATACGGCCGAAAAGCATCTAGTCCTA  
CAATCACCACCATCAGGAGGCAAAAAAGGCGAGAGAGACAAAGACAAGAAACCCCAACAA  
GGCGAAGAAAAACCAGATCAAGGTCCCGAAGCACCAGCAGCGGGAGGGAGGGCCACCA  
GACGATCCCTCTCCAGAGAATCCGCAGAATCCCCAGGCGGGGAGGGAGAGGTGGAGGGG  
GCCCCCTCACCAGGTCCCGCTCAAGGTGCGGATCCCGTACACGAGAGTCTGTTGACGGGG  
GTGGCGTCGCGCCTGACGAAGTGGGAGCAACACTTCGATCAATTGGTAGACAGCATAGTG  
GGCAATTGCGCAATTACTGGACGCAGCTAAAGACCCCCCAGTAATTCTGCTACGCGGTG  
CAGCAAAATACATAAAATGCTATCGCTATAGATTTAGAAAGAAACATGCTGGAAGCTTCC  
AATTTATTAGTACAACGTGGTCCTGGGTAGGGGGGCATACAACCGATAGAATCGGGCGCT  
CTAGGATACTAATATCATTTTCATACAGATAGGGAAAGAGAGAAGTGCTTGCAACAAATGA  
AACTTCCTTTAGGTGTAGAATGGTCATATGGCCAGTTTGATGATTTATAAACTGCTTTTT  
TACTAACACACTAACATTGCCTATTTATACTAACCTATTTGCTTGCTACTAACAAAATGG  
CGCGAGCGCGAAGAACAAGCGAGCGTCAGTAACTGACATTTATAAAGGCTGTAAGGCCT  
CTGGGACTTGTCCTCCCTGATGTTATTAATAAAGTGGAACAAAATACACTTGCTGATAAAA  
TTTTAAAGTATGGCAGTGTTGGTGTGTTTTTTGGTGGTCTTGGTATAAGTACAGGTAAGG  
GTACCGGTGGTCCCTACAGGCTATATTCCCTTAGGTCAAGGTCCTGGAGTGCGTGTGGGCG  
CCACTCCCACAGTGGTCCGCCCCGGGGTCATACCTGAAATAATTGGACCAACTGAATTAA  
TACCAGTTGACTCAGTAACACCAATTGACCCTGCAGCACCATCCATAGTGACATTAACAG  
ACAGTAGTGACGGTGCTGACCTTTTACCTGGTGAAGTTGAACTATTGCAGAAGTACATC  
CGGTCCCAATAGACAATGTGGAACCTTGACACACCTTTAGTTTCTGGGGACCGTCACGCCA  
TTTTGGAGGTGACTGATGCTAATCCCCCTTTTAGGCGCACGGTTACCCGGACACAATATC  
ATAATCCTGCTTTTGAAATTATTTAGAGTCTACACCATTAATAGGTGAATCTACACCCT  
CTGACCATGTTTTTGTGTTTTTGAAGGCTCGGGAGGTGTACAGGTAGGGGATGCTAATGAAA  
GCATTGAATTGGATACTTTTCTTCTAGATATAGTTTTGACATTGAGGAGCCAACCCCTC  
CTCGTAGAGTTAGTACACCAATTGAAAGAATCAGTCAGGAATTTAGAACTTTAAGAAGAG  
CCTTATACAACAGAAGATTAACAGAACAGGTCCAAGTAAGAGACCCCTTGTTTTATTCGAT  
CCCCGTCCAGGCTTGTGAGATTTCAATTTGATAATCCAGTATTCGATGAGGAAGTTACAC  
AAATATTTGAAAGAGATGTAGCTGCAGTAGAAGAACCACCAGACAGGGATTTTTTTAGATA  
TTGAAAGACTTGGAAGGCCTATACTAACAGAACTGCAGAAGGCCGTGTTTCGTGTCAGCA  
GGTTAGGGCAACGTGCATCGCTGAGCACACGCAGCGGCGCACGTGTAGGTGCTAGAGTGC  
ATTTCTTTACAGATATTAGCACTATTAATGCAGAAGAGCCCATTGAATTAGAATTATTAG  
GTGAGCATCTGGCGACAGCTCTGTAGTACAAGAACCATTTGAAAGCACAAATATTGGATG  
TCAATATTGACAACATACCTGAAAGTTTGGATACAAACATAGCAGAAACATCTGTAGACT  
ATGATTCTGCTGATTTGTTATTAGACAACGGTGTGGAGGACTTTAGTAGGTCACAATTGG  
TAATAGGTCCCTCAGATAGATCACTTCCATCTATTACTGTTCCACAATTGAATCCCCTA  
GAGAAACCATTTGTGTACATACAAGACATAGAGGGTAATACAGTTGTATATCCTAAATATG  
AAGAAAGGCCAACATTATTATATTACCTACACCCCTCGGGGCCCTGCTATAATTCAATCACCTA  
CACATTTCCCTTTGATATATTATTACATCTTAGCTTGCAGGAAAAAACGCAAACGCA  
AATATTTATAATGTTTTTCAGATGACCCCTCTGGCTTCCAACCTTCGGGTAAAGATATATTTG  
CCTCCTACGCCACCGGTAGCCCCAGGTACAAAACACGGACGAGTATGTGGAGAGGACTGAC  
ATCTATTACCATGCTATAAGTGACCGTTTATTAAGTGTAGGACATCCTTACTTTGATGTT  
AGATCATCAGATGGAGCAAAAATAGAGGTCCCTAAAGTGTCTGGAAATCAGTTTAGGGCT  
TTTAGAGTAACATTTCCAGATCCTAACAAAATTTGCTTTGGGAGATATGACAATCCATGAT

```
>gi|1020170|gb|U31779.1|HPU31779_Human_papillomavirus_type_21,_complete_genome
```

TGCTGCTGCATTGTTTTGGTATAAGGGTGCGATGGGGTCTGGAGCATTTACTTATGGACC  
TTATCCTGATTGGATTGCCAGCAAACAATTGTTGGTCATCAAAGTACAGAAGCCAGTGC  
ATTTGATATGTCTGCAATGGTTCAATGGGCGTTTGATAATAACTATTTAGATGAAGCTGA  
TATAGCCTATCAATATGCTAAGCTAGCACCAGAAGATAGTAATGCTGTAGCATGGCTTGC  
ACATAATAATCAGGCCAGATATGTTAGAGAAGTTGCATCTATGGTAAGATTTTATAAAAA  
AGGACAAATGAAAGAAATGTCTATGTCAGAGTGGATACATACTAGAATTAATGAAGTAGA  
AGGAGAAGGACATTGGTCAACTATAGCAAAGTTCCTTAGATATCAGCAAGTAAATTTTAT  
AATGTTTCTAGCAGCATTAAGACATGCTACATTCAGTTCCTAAACGTAATTGTATATT  
GATTTATGGTCCCCCTAACACTGGAAAAGTCAGCATTTACTATGTCTTTAATTCATGTACT  
AAGAGGGAGGGTGCTATCATTTTGTGAATTCCAAAAGCCAGTTTTGGCTGCAGCCAATGTC  
AGAATGTAAAAATAGCATTAATTGATGATGTGACAGATCCATGCTGGATATATATGGATAC  
TTATTTAAGAAATGGCCTAGATGGTCATGTTGTATCATTAGACTGCAAAACATAAAGCACC  
GATGCAAACCAAATTCCTGCATTACTACTTACATCTAATATCAATGTGCATAATGAAGT  
TAATTATAGATATTTGCATAGCAGGATTAAAGGCTTTGAATTCCCAAATCCATTTCCCAT  
GAAAGCAGACAATACCCCTGAATTTGAGCTTACTGACCAAAGCTGGAAATCTTTTTTTTAC  
AAGGCTTTGGAATCAATTAGAGCTGAGTGACCAAGAAGACGAGGGAGAAAAATGGAGAATC  
TCAGCGATCGTTTCAATGTTCTGCAAGATCAGCTAATGAACATTTATGAGTCTGCAGCAA  
ACACTATTGAGTCGCAAATTTGAGCATTGGCAAACACTGCGAAAAGAAGCTGTGCTGCTTT  
ATTTTGCTAGGCAAAGGGTGTGACACGGCTTGGATATCAATATGTACCTCCATTAGCAG  
TTTCAGATCAAGAGCTAAACAGGCTATAGGGATGATGCTGCAGTTGCAATCATTGCAAA  
AATCTGAATATGCAAAGGAACCATGGTCACTGGTAGATACCAGTGCAGAGACATTTAGAA  
GCCCTCCTGAAAATCATTTCAAAAAAGGGCCAGTGTCAAGTTGAGGTTATTTATGATAACG  
ATAAAGACAATGCTAATGCTTACACCATGTGGAGATATGTTTATTACGTGGATGATGACG  
ACCAATGGCATAAAAAGTCCAAGCGGTGTCAACCACACAGGCATATATTTTATGCAAGGAA  
CTTTTAGACACTACTATGTTTTATTTGCTGATGATGCAAGTAGATATAGCAGAACTGGAC  
ATTGGGAAGTTAACGTTAATAAGGAAACTGTGTTTGCTCCTGTCACCAGCTCCACCCAC  
CCGACTCACCAGGAGGACAAGCAGACTCAAACACCTCCTCCACGACCCCCGCCACCACCA  
CTGACTCCACGTCCAGACTCTCGTCCACCAGAAAACAGTCACAACAAACCAACACCAAAG  
GAAGAAGGTACGGACGGAGACCGTCCAGTAGGACCCGGCGAACGACCCAAACGCATCAAA  
GGCGGCGATCGAGGTCCAAGTCCAGGTGCGGGTTCGCGGTTCGCGGTCCGATCCC  
GATCCCGGTCCCGATCCCGGTCTTATTCCTCCCGTCCCGTCTCAATCGTCTGACCAGCCGC  
AATACCGATTGAGATCCGGAGGGCAAGTGTCCCTCATCACTACCGCCACCACCACCACCA  
CCACCGCAACCAACTACTCCACCAGAGGGTCAGGGCGAGGGTCATCCTCCACCTCCTCCT  
CCACCTCCAAACGGCCACGACGGCCACGAGGAGGGGCCATTGGAGGGAGCAGTGGGAGGG  
GGAGACGGTCACTCTCCACCTCCCCCAGCCCCCTCCAAACGGTCACGAGGAAAGTCAGAGT  
CTGTTAGGCAACGTGGCATCTCTCCTGACGACGTGGGAAAGTCTCTTCAATCAGTTAGTA  
CAAGAAATACAGGTGACTTGGAAGATTACTGGACGAAGCTCTCGATCCCCCAGTAATCT  
TAGTCAGGGGGGAACCCAATACGCTAAAAATGCTTTCGCAATAGAGCCAAGCTTAAATACG  
CAGGGTTGTATAAGGCTTTCAGTACGGCCTGGTCGTGGGTGGCTGGAGATGGTACTGAGC  
GTCTAGGCAGGTCCAGAATGCTCATTAGCTTCTTCTCCTTTGAGCAAAAGAAAAGATTTTG  
ATAAGACTGTTAAATATCCGAAAGGTGTTGACCGGTTCGTATGGTTCTTTGATAGCCTAT  
AGCAGCCTTTAACATACTAATACTATAGCTCTGCTACTAACATATTAACACTTTTTGATTAT  
ATATTTTTTTTTTATTTTTATTTTTATGCTATGGCGCGTGCTAAGCGAGTCAAGCGAGAC  
TCTGCTACTAATATTTACAGAACCTGCAACAAGCAGGCACATGTCCCCCTGATGTTATT  
AATAAAGTTGAAAGCACAACCTATTGCTGATAAAATATTGCAGTATGGTAGTGCTGGTGT  
TTTTTCGGGGGGCTGGGCATAAGCACTGGAAAAGGTACAGGCGGTACCACAGGTTATGTG  
CCTTTGGGAGAAGGTCTGCACTCCGTGTTGGCAATGCTCCTACGGTCATTAGACCTGCA  
TTGGTCCCTGACACCATTTGGCCCGTCTGATATTATTCCTGTGGACACCTTAAATCCAGTG  
GAGCCACAACCTTCCTCTATTGTTCCACTCACAGACTCTACAGGCCAGATCTGTTACCT  
GGAGAAGTGGAACCTATTGTCAGAAATACATCCTGGTCCGACCAGGCCCTCCACCTGACACT  
GCAGTCACTACTAGTACAAATGGTTCTAGTGTGTTTTAGAAGTAGCACCAGAGCCTACC  
CCTCCTTCTCGTGTTAGAGTAACCAGAACACAATATCATAATCCATCTTTTCAAGTAATA  
ACTGAATCAACTCCTACTACAGGCGAAAAGTTCTTTAGCAGATCATATATTAGTAACATCA  
GGGACTGGGGGACAACTATAGGGGCGAGTACACCTGAACTCATAGAACTCCAGGACTTT  
CCTTCTAGATATTCATTTGAAATTGAGGAGCCAACACCTCCTAGAAGAACTAGTACACC

ATTCAAAGAATTCAAATATTATAAGGAGAAGGGGTGGCGGGCTCACAAATAGGCGTTTG  
GTTCAACAGGTTAATGTAGAGAATCCTTTGTTTGTATCCAGGCCTTCTAGATTAGTGCAG  
TTTCAATTTGATAACCCTGCATTTGAAGAAGAAGTGACACAAATATTTGAGCAAGATATT  
GATACTTTCAATGAACCACCAGATAGAGACTTTTTAGATATTTAAACACTTGGTAGGCCT  
CAATACTCAGAAACCCCTGCAGGTTACGTGAGAGTTAGTCGTCTTGGTAAACGAGGAACT  
ATTCGTACTIONTTCAGGAACACAAATTGGTTCCTCAGGTCCATTTTTACAGGGACCTTAGC  
ACCATTAACACAGAGGACCCTATTGAACCTCAATTATTGGGTGAGCATCTTGCGGATGCT  
ACAATTGTCCAGGGTCCAGTTGAAAGCACATTTATTGATATTAACGTTGATGAAAACCCCT  
CTTTCTGAAGATTTTTAGTGCACATTCAGATGATTTACTTCTAGATGAGGCAAATGAAGAT  
TTTAGTGGTTCCCAATTAGTGGTTGGAGGCCGCCGCTCCACTTCTTCTTATACTGTTCCA  
CGTTTTGAAACTACTAGATCTGGTTCTTATTACGTGCAGGACACCAAGGGCTATTATGTA  
GCCTATCCTGAAGATCGAGACACTAGTACAGATATAATCTATCCAACACCAGATTTGCCA  
GTTGTAATCATACACACATTTGATACAAGCGGTGATTTTTACTTACATCCGAGTCTTAGC  
AGAAAATTTAAGAGAAGAAGGAAATATTTGTAACCTTTTCTTTTGCAGATGGCAGTTTG  
CAAGCAGCTAGTGGTAAGGTTTACCTTCCACCGTCTACACCAGTTGCCAGGGTCCAAAGC  
ACGGATGAATATGTACAAAGAACAACATCTACTATCATGCATATAGTGATCGCTTATTA  
ACTGTTGGTCATCCATATTTAATGTCTATGACGTCAATAGTGCTAAGATAAAAGTACCT  
AAAGTATCTGGGAATCAACACAGGGTATTCAGACTCAAATTGCCAGATCCTAATAGATTT  
GCATTGACAGATATGTCTGTATACAATCCAGACAAGGAAAGATTAGTTTGGGCCTGCAGA  
GGTATTGAGAAATAGGTAAGGGCAACCCCTGGGGGTGGGAAGTGTAAGTACCCCTTTATTT  
AATAAAGTTGGGGACACAGAAAATCCTAGTTCATACAAAACCTCAACCAAATCTACTGAT  
GATAGACAAAATGTATCATTTGATCCCAAACACTACAAATGTTTATAATAGGCTGTGCA  
CCTTGCTTAGGAGAACATTGGGATAAAGCTATCCCATGTGCAACTGACAATCCACCTCCA  
GGATCGTGCCCTCCGATTGAATTAATTAATTCAGCAATACAAGATGGCGATATGGCAGAT  
ATAGGATATGGCAATCTAAATTTCAAAGCCTTACAACAAAATAGGTCTGATGTTAGTTTA  
GACATAGTTAATGAAACGTGTAAGTATCCAGACTTCTTAAAAATGCAAAATGATGTGTAT  
GGAGATTGATGTTTCTTTTATGCACGCAGAGAGCAATGTTATGCCAGACACTTCTTTGTT  
AGAGGGGGCAAACAGGAGATGACATACCCGCAGGACAAATTGATGAGGGTAGTATGAAG  
AATGCATATTACATTCACCAATGAATGATCAAGCACAGTACAAGATTGGTAACCTCATG  
TATTTCCCAACTGTCAGTGGCTCATTGGTGTCTAGTGACGCTCAATTGTTTAACAGGCCA  
TTTTGGCTACAGCGTGACAAAGGCCATAATAATGGCATATGTTGGTTAATCAATTATTT  
GTTACAGTAGTAGACAACACTCGTAACACAACTTTAGTATTTTCAGTAAATCCTGAGAAT  
GCAGACGTGTCTAAAATTGAAAATTATAAAGCCGAGAGCTTTCAAGAATATTTAAGACAC  
GTTGAAGAATATGAACCTTTCTTTAATTTTACAATTATGTAAAGTTCCTTTAACAGCAGAA  
GTCTTAGCTCAAATTAATGCAATGAATGCAAAATATTTTAGAAGAATGGCAGTTAGGATTT  
GTTCTGCCCCAGACAATCCTATTGATGATACATATAGATACATTGACTCTGCAGCTACT  
AGATGTCTTGATAAAAACCTCCAAAAGAACGAGAAGATCCTTATAAAAAATATGAAATTT  
TGGGATGTAGATTTAACAGAACGGTTGTCTCTAGACTTAGATCAATATTCTCTTGGAAGA  
AAATTTTTTATTTCAAGCAGGTTTGCAGCAGACGACCGTTAACGGTACAAAGACACTTTCT  
TCAAGGGTATCTACCAGAGGAATTAACGAAAACGCAAAATTAGACATGACCGTTTTCG  
GTACAATAAAGTCACTTTTACACAGTATTCAGGAATGTTTATTTACTCTGACTAAGCA  
AAATACCAACCGCGCCCGACACATAAAGGTGAGTTGTGAGCCAAATGAGGTGAGTTGTAA  
GCCAAAAGAGGTCAGAGCCAAGTCTGTTCTGAGCCAGATCAGATACTACGCGCGCCAGAG  
TTGGATCACATCTCGTTGTTCTAACACGCTAAGGACTCAAGGAAATGTAAGTCTGCCAAT  
CGATTTTGGCTCGTGTTTTGGCAGAAGTTAGGACCGTTA

>gi|1020162|gb|U31778.1|HPU31778\_HumanPapillomavirus\_type\_20,\_complete\_genome

TCGGGCGCGGTCATACATTACTCATTTGGTAGTTGTTGTTGCCAGCTACCATCAAGCATA  
GCATGTTTTTGCCGTGAACGTTATCGGCACAGTGATTAATATATATATATATATATATAT  
ATATATATATATATATATATATATATATATAGATACATATAGACAGATATCATAGAGCTA  
ATGCAGAGAGTGACAGGCATAGGCTACACCTCCTTCTTCAAGAAGACAGCGCTGATGAAGG  
ACCATCTAATATTGGAGAGGCCAAAACCTCCAATCTTAGAGCCACCATTGCCTGCAACAAT  
CTGTGGCCTAGCAAAACCTTTTAGAAAATACCGCTAGATGATTGTTTGATACCTTGTAACCTT  
CTGCGGTAATTTCTTTACACATTTAGAAAGTTTGTGAGTTTGATGAGAAAGAGCTTACTTT  
AATTTGGAAAGATCATTTGGTTTTTGCATGCTGTGCTGTTTGCTGCTCGGCAACAGCGAC  
ATATGAGTTTAATCAATTTTATGAGAGTACTGTTTTAGGCAGAGACATAGAGCAAGTAAC

AGGCCAAATCTGTTTTTGTATATAGATGTCAGGTGCTACACCTGTATGAAATTTTTAGACTC  
AATTGAAAAGCTAGACATCTGTGGCAGAAAGCGTCCATTTTATTTAGTGAGAGGCTCTTG  
GAAAGGAATCTGTAGGCTGTGTAAGCATTTCATAAATGATTGGTAAAGAGGTCACATTG  
CAAGATATTGTGCTGGAGTTAAATGAATTGCAGCCTGAGGTTCAACCAGTTGACCTGTTT  
TGTGAAGAGGAGTTACCGAACGAGCAGCAGGAGAGAGAGGAGGAGCCTCAGATTGAAAGA  
GCCTCATACAAAGTTGTTGCACCTTGCGGCTGCTGCAAGGTGAAACTTCGCATCTTTATA  
AGCGCTACAGAATTTGCTATTAGAAGCTTTCAACAATTGCTGATTGACGAGCTGCAGCTG  
TTGTGTCTTACTGCTGTCGCGGGAACCTGCAACATGGCGGATCCTAAAGGTAGTACATCTAA  
AGACGGGTTGGATGATTGGTGTATTGTTGAAGCTGAATGTAGCGATGTAGACAATGATTT  
GGAAGAATTATTTGACAGAGATACAGACTCAGATATTTCAGAATTATTAGATGATAATGA  
CCTCGAGCAGGGCAATTCTCGGGAACATTTTCATCAACAAGAGTGTAAAGGACAGCGAGGA  
GCAATTACAAAAACTAAAACGAAAGTACATAAGTCCAAAAGCTATTGCACAGCTTAGTCC  
GCGACTTGAAAATATTTCACTGTCAACCACAGCAGAAGTCAAAACGAAGGCTTTTTGCAGA  
GCAGGACAGCGGGCTCGAGTTAACTCTTACAAATGAAGCTGAAGATGTTCTTCTGAGGT  
GGAGGAGGTACCGGCCCTAGACTCTCAGCCGTTGCTGAGGGACACTTAGGAACAGTAGA  
CATTCAATTATACAGAATTATTGCGTGCCAGTAACCATAAGGCAATTTTGTGGCAAAATT  
TAAGGAGGCTTTTGGGATAGGGTTAATGATTTGACACGTCAATTTAAAAGTTACAAAAC  
CTGCTGTAATGATTGGGTTCTATCTGTGTATGCAGTTCATGAGGATCTTCTTGAAAGCTC  
AAAGCAGTTATTGCAACAGCATTTGTGATTATATATGGATCCGTGGGATAGCAGCAATGTC  
ATTGTTTCTATTGTGTTTTAAAGCAGGAAAAAATCGTGGGACTGTGCATAAATTAATGAC  
ATCAATGTTTGAATGTGCATGAAAAGCAAATATTGTCTGAGCCTCCAAAATTAAGAAATGT  
TGCTGCTGCTTTATTTTGGTATAAAGGTGCAATGGGGTCCGGAGCATTTCATGCTCC  
ATATCCTAACTGGATGGCACAGCAAACTATTGTTGGTCATCAGAGCACAGAAGCCAGTGC  
TTTTGACTTGTCTGAAATGATTGAGTGGGCATTTGACCATAATTATCTAGATGAGGCTGA  
TATAGCCTTTTCAAGTATGCTAAGCTAGCACCAGAAAATAGTAATGCTGTAGCATGGCTTGC  
ACATAATAACCAAGCAAGGTTTGTAGAGAATGTGCATCAATGGTCAGGTTTTATAAAAA  
AGGTCAAATGAAAGAAATGAGCATGTGCAATGGATTTATGCCAGAATTAATGAAGTAGA  
AGGCGAAGGACATTGGTCATCTATTGCTAAATTTCTTAGATATCAGCAAGTAAATGTTAT  
AATGTTTTTAGCTGCTTTGAAAGATATGCTGCATTCTGTACCTAAACATAACTGTATATT  
AATACATGGCCACCTAATACTGGAAAATCTGCATTCACTATGTCAATGATACATGTGTT  
AAAGGGAAGGGTATTGTCCTTTGTAAATTTCTAAAAGCCAATTCTGGTTACAACCAATGTC  
AGAACTAAAATAGCATTAAATTGATGACGTAACCTGATCCTTGCTGGGTTTATATGGATAC  
ATATTTAAGAAATGGCTTAGATGGACATTATGTCTCACTAGATTGCAAGCATAAAGCACC  
AATTCAAACAAAATTTCTGCTTACTGCTTACCTCTAATATTAATGTTTCAATGAAGT  
TAAGTATAGATATTTACATAGTAGAATTAAAGGATTTGAATTTCCAAATCCATTTCCAAT  
GAAACCAGACAATACCCCTGAGTTTGAGCTTACTGACCAAGCTGGAAATCTTTTTTTTAC  
AAGGCTTTTGAAGCAATTAGAGCTGAGTGACCAAGAAGACGAGGGAGAAAATGGAGAATC  
TCAGCAAGCGTTTCAATGCTCTGCAAGATCAGCTAATGAACATTTATGAGTCTGCACCAG  
ACACTCTTGAGTCGCAATTGAGCACTGGCAAACCTGCGAAAAGAAGCTGTGCTACTAT  
ATTTTGCTAGGCAACATGGTATCAGCAGGGTTGGATATCAACCTGTGCCTGTATTAGCTG  
TGTCAGAAAGCCAAAGCTAAACAGGCTATAGGAATGGTATTAAGGTTACAATCATTGCAA  
AATCTGAATATGGAAGTGAACCATGGTCTTTGGTAGATGCAAGTGCAGAGACATTTAGAA  
GCCCCGCCAGAAAATCACTTTAAAAAAGGTCCGATTTCAAGTAGAGGTCATATATGACAAAG  
ATAAAGACAATGCCAATGCTTATACCATGTGGAGATTTGTTTATTACCAAGATGATGACG  
ACAAGTGGCACAAAAGTGTAGTGGTGTAAACCAAACAGGCATATATTTTATGCAAGGAA  
CATTTAGACACTACTATGTTTTGTTTGTGCTGATGATGCGAGTAGATATAGTACAACCTGGAC  
AATGGGAAGTGAAAGTTAATAAGGAACTGTGTTTGCTCCTGTCAACAGCTCCACCCCCC  
CCGACTCACCAGGAGGACAAGCAGACTCAAACGCCCTCCTCCCAGACCCCCGCCACCACCA  
CTGACTCCACGACCAGACAGCTCGCCAGAAAACAGTCACAACAAACCAACCAAGGGA  
GAAGGTACGAGGAGAGACTTCCAGTAGGACAAGGCGAACAACCCAAACGCCAGAGGC  
GACGGTCCAGGTCAAAGTCCAAGTCCAAGTCCAGGTGCGGGTCCAGGTGCGGCACCGGT  
CTCGGTCTCGGTCTCGGTCTGAATCGCCGCGCGGGTCTCGGTACCGATCACGATCCG  
GATCCAGAGGGAGAGTCGCCCTCCGCGCCATTACCACCACCACCACAACCACCACCAGAC  
GGGCAGGTGGAGGGTCACCCACCTCCACCTCCTCCACCACCTCACAACGGTCCGCGACAGC  
TGCGGGGAGGGGGCCGTGGGGGGAGCAGACAAAGAGCAAGGGGAAGGCGATCATCATCCA

CCTCCCCACCCCCTCAAAACGGTCACGAGGGGAGTCAGAGTCTGTTAGGCAACATGGCA  
TCTCTCCTTCTGACGTGGGAACAGCAGTTTACACAGTTAGTTCAAGACATACAGGAAGAC  
TTGGAAGATTACTGGATGAAGCTCTCGATCCCCCAGTGATTTTAGTTAGGGGAGAGCCTA  
ATACGCTTAAGTGCTTTTCGCAATAGGGCCAAACAAAGATATACAGGGCTGTATAAGTCTT  
TTAGCACGGCCTGGTTCGTGGGTGGCTGGAGATGGCACGGAGCGTCTAGGCAGGTCCAGAA  
TGCTCATTAGCTTTTATATCCTTCAGTCAAAGAAAAGATTTTGATGAGACTGTGAAATATC  
CGAAGGGGGTTGACCGGTCGTTTGGTTCATTTGACAGCTTATAGCAACCTAACCTTCTAA  
CCACTGCATGCTACTAACACACTAACATTTTTTTAATTTTTTATTAATATTTTTTATTTGCT  
ATGGCGCGCGCTAAGCGAGTCAAGCGGGACTCTGCTACTAACATATACAGAACCTGCAAA  
CAAGCAGGTACTTGTCTCCTGATGTTATAAATAAAGTGGAAGCACAACTATTGCTGAT  
AAAATTTTGCAGTATGGTAGTGCTGGTGTTTTTTTTTGGGGGATTAGGCATAAGCACTGGA  
AAAGGTACAGGAGGAACACAGGTTATGTGCCTTTGGGAGAAGGCCCATCGGTGCGTGTT  
GGTGGTACACCTACAGTCATACGACCTGCTTTGGTCCCAGACACCATCGGCCCTCCGAT  
ATTATACCTGTGGACACCTTAAATCCGGTGGAGCCTTCTACCTCTTCTATTGTTCCACTT  
ACAGAATCCACAGGACCAGATCTTTTACCTGGTGAAGTGGAACCTATTGCAGAAATACAT  
CCAGGCCCCCTCAAGGCCACCAACTGATACACCAGTTACATCTACTACCAGTGTTCTAGT  
GCAGTTCTAGAGGTAGCACCAGAACCAACACCTCCAGCTCGTGTGAGAGTCAGCCGCACC  
CAGTATCATAACCCATCATTTCAAATAATACTGAATCAACACCAACATTGGGGGAAAGC  
TCATTAGCGGATCATATAGTAGTGACATCTGGTTCCTGGGGGCCAAGCAATTGGGGGGATG  
ACACCTGCAACTTATAGAGCTTCAGGATTTCCCATCAAGGTATTCATTTGAAATAGAAGAG  
CCAACCCCTCCTAGAAGAACTAGCACACCTATGCAAAGACTTCAAAATGTGTTCAGGCGT  
AGAGGAGGCCTTACTAACAGAAGATTAGTTCAACAAGTGCCTGTAGACAATCCATTATTT  
TTGACACAACCTTCTAGATTGGTCCGGTTTTCAGTTTTGATAACCCGGTTTTTTGAGGAAGAA  
GTTACTCAAAATATTTGAACAAGATTTAGACACTTTTAAATGAGCCCCCAGACAGAGACTTT  
TTGGATGTTTACAGAGTTTAGGCAGGCCTCAATACTCAGAAACTCCTGCAGGTTATGTGCGG  
GTCAGCCGTGCAGGTCAACGAAGGACTATCAGAACTCGTTCTGGAGCACAAATAGGGTCT  
CAAGTGCACCTTTTATAGAGATCTCAGTAGTATTGATACAGAAGATCCTATTGAACTGCAG  
TTGTTGGGTCAGCATCTGGCGATGCAACTATTGTCCAAGGTCCAGTAGAAAGCACTTTT  
GTTGATATCAATGTAGATGAAAACCCACTTTCAGAAATCAGTGCATATTCTGATGATTTA  
CTTTTAGATGAAGCTAATGAAGACTTTAGTGGCTCTCAGTTAGTTGTAGGGGGAAGGCGT  
TCTACATCTACATACACTGTTTCTCACTTTGAACTACTAGATCTAGCTCTTACTATGTA  
CAAGATACAAAGGGGTATTATGTAGCATATCCTGAAGATAGAGATGTTAGTAAGGACATT  
ATTTATCCTAATCCAGATTTACCAGTGGTCATTATTACACATATGACACAAGTGGAGAT  
TTTTATTTACATCCAAGTCTTACTAAAAGATTAAAAAGAAAAAGGAAATATTTGTAACCTT  
TTTCTTTTGCAGATGGCAGTTTTGGCAAGCAGCTAGTGGTAAGGTGTACCTTCCACCATCT  
ACACCAGTTGCCAGGTCCAAAGTACGGATGAATATGTGCAAAGGACTAACATATACATAT  
CATGCATACAGTGATCGCCTACTAACTGTTGGTCATCCATATTTTAAATATATATGACATC  
CAAGGCACCTAAGATAAAAGTCCCTAAGGTTTCTGGAAATCAGCACAGAGTGTTTAGGTTA  
AACTACCAGATCCCAACAGATTTGCATTAGCAGATATGTCTGTGTATAACCCAGATAAA  
GAAAGATTGGTCTGGGGCTGTAGAGGTATAGAAATAGGTAGAGGACAGCCATTAGGCGTT  
GGAAGTGTAGGTCATCCATTATTTAATAAACTTGGTGACACAGAAAACCTAATTCATAT  
AAAGGGAATTCAACTGATGATAGACAAAATGTATCTTTTGACCCTAAACAACCTACAAATG  
TTTATAATAGGCTGTGCCCCATGTTTAGGAGAACATTGGGACAGGGCTTTACCATGTGCA  
GACGACGTTCCAAACCCAGGTTTCATGCCCTCCAATAGAATTAATAAATACAGCAATACAA  
GATGGCGATATGGCAGATATAGGATATGGCAACCTAAATTTTAAAGCATTACAAGAAAAC  
AGAGCAGATGTAAGTTTGGATATTGTTAATGAGACCTGTAAATATCCAGACTTTTTTAAAA  
ATGCAGAATGATGTTTATGGAGATTCTGCTTTTTTTATGCTCGGCGGGAACAATGTTAT  
GCTAGACACTTTTTTGTACGTGGGGGCAAAACAGGAGATGATATACCTGCAGGACAAATT  
GATGAAGGTAGCATGAAGAATGCATTCTACATTCCACCTGTGAATAATCAGGCACAGAAC  
AACCTAGGTAATTCAATGTATTTCCCAACTGTTCAGTGGCTCATTGGTGTCTAGTGATGCT  
CAATTGTTTAAATAGGCCATTTTGGCTGCAGCGCGCACAGGGCCACAACAATGGCATCTGC  
TGGTTCAATCAACTATTTGTTACTGTAGTAGATAATACTCGAAATACAAATTTTAGCATA  
TCAGTTTCATTTCAGAAAACACTGATGTTTCTAAAATTCAAAATTATGATTCTCAGAAATTT  
CAAGAATATTTAAGACACGTAGAAGAATATGAAATTTTATTAATTTTACAGCTCTGTAAA  
GTTCTTTTAAACAGCTGAAGTTTTAGCTCAAATTAATGCTATGAATTCAAATATATTAGAG



GAGTGGCAGTTAGGATTCGTTCTGCACCGGATAATCCTATCCACGATACATACAGATAT  
ATTAATTCTGCAGCTACTAGATGTCTGATAAAAATCCTCCAAAAGAAAGAGAAGATCCT  
TACAAGGATCTAAACTTTTGGGAATGTTGACCTATCAGAAAGATTATCCTTAGAATTGGAT  
CAATATTCTTTAGGACGCAAATTCTTATTTCAAGCAGGTTTACAACAAGCGACCGTAAAC  
GGTACAAAACTGTATCTTCAAAGTTATCTACTAGGGGCGTCAAACGAAAACGCAAACAA  
TAAACCCGACCGTTTTTCGGTACAATAAAGTCAACTTTTACACGGTATTCAAGGAATGTTT  
ATTTACTCTGACTAACTAAGATACCAACCGCACCCGACACATAAAGGTGAGTTGTGTGCC  
AAATGAGGTGAGTTGTGAGCCAGAAGAGATCACAGCCAAGTCAGGCTTGAGCCAGATCAG  
ATACACTGCGTGCCAGAGTTGGCTCAAACTTCATCGTCCCAACACGTTTCGGAACAGGAGG  
AAATGTAAGGTGCCAACGCTTTTTGGCTCTTCTTTTTTGGCACAGCAGAAGACCGTTAACG  
GTAAGTTTTTATTTGTA

>gi|333211|gb|M73236.1|PPHPAPV42A\_Human\_papillomavirus\_ORF\_E6,\_ORF\_E7,\_ORF\_E1,\_O  
RF\_E2,\_ORF\_E4,\_ORF\_E5,\_ORF\_L2,\_and\_ORF\_L1\_genes,\_complete\_cds  
CTTATTATAAACTACAATCCTGGCTTTGAAAAATAAGGGAGTAACCGAATTCGGTTCAAC  
CGAAACCGGTACATATATAAACCACCCAAAGTAGTGGTCCCAGTTAAGGCAGAATGTCAG  
GTACATCTGCCTCATCACAGCCACGCACATTATACCAATTGTGTAAGGAATTTGGGCTGA  
CATTGCGGAATTTACAGATTTCTGCAATTTGGTGCAAAAAGCACTTAACAGGCGCAGAGG  
TGCTCGCGTACCATTTTAAAGATTTGGTAGTGGTGTGGAGGAAGGACTTTCATATGCTG  
CATGTGCATTTTGTGTTAGAAATTTAATTCTAAAAATTTGTGCACTGCGACACTACGAAAGAT  
CAGCATTTTGGTATACAGTGGAGAAAGAACTGGACTACTTTTAGAAGAACAACAATTA  
GATGTGCCCTTGTGTCAAAAGCCGTTATCACAGAGCGAAAAAACCATCATATTGATACAG  
GTACAAGATTTCAATTTATATTGTGTGCTAGTGGACGGGTGCGGTGTACGCATTGCAGAGGAC  
AATGCGTGGAGAGACGCCTACCCTAAAGGACATTGTTTTGTTTGACATACCAACGTGTGA  
GACACCCATTGACCTGTATTGCTATGAACAATTGGACAGCTCAGATGAAGATGACCAAGC  
CAAACAGGACATACAGCGTTACAGAATACTGTGTGTGTGTACACAGTGTACAGTCTGT  
TAAACTCGTTGTGCACTGTACAGAGGCGGACATAAGAAACCTGCAACAGATGCTTTTGGG  
CACACTGGATATTGTGTGTCCTTTGTGTGCCCCGCTGGAGTAACTGCAATGGCGGATGAT  
ACAGGTACAGAGGAGGGGCTAGGGTGTCTGGATGGTTTTGTGTAGAAGCTATAGTAGAC  
AAAACAACAGAAAATGCTATTTTCAGATGACGAGGACGAAAATGTAGACGATAGTGGGTTA  
GATCTTGTGGATTTTGTAGATAATAGTACAGTAATACATACAAAGCAGGTACATGCACAA  
GCCTTATTAAATAAACAACAAGCACATGCAGATCAGGAGGCAGTACAGGCACTAAAACGA  
AAGCTATTAGGCAGTCCATATGAAAGCCCTGTCAGTGATTACAGCACAGCATAGACAAC  
GACTAAGTCCTAGGCTTGGCGGTTTAAACGCTATGTCGGGGGTCCCAAGGGGCCAAACGA  
CGATTATTCCAGTCACTGGAAAATCGAGACAGTGGATATGGCTATTCTGAAAGTGGAAGTA  
CAGCAGACACAGGTAGAACACGGACATGGCGCCGTACATGGGACTATGGGTAACGGGGGG  
GCAGTGGGTAGTGAACCTTGGGGTGCAGGAAAATGAAGAAGGTAGTACTACAAGTACGCCT  
ACAACAAGGGTGGTAGAATTACTTAAGTGTAAGAACCCTGCATGCAACATTGTTAGGTAAG  
TTTAAAGAATTGTTTGGAGTGTCAATTTGGCGATTTAGTAAGACAGTTTAAAAGTGACAAA  
AGCAGTTGTACAGACTGGGTTATTGTCAGCATTTGGGGTTAATCATAGTATTGCAGAAGGG  
TTTAATACATTAATTAAAGCAGATTTCACTATATACACATATACAATGGCTAACCTGTACG  
TGGGGCATGGTGTATTATTAATGCTAATTAGATTTAAATGTGGAAAAATCGTACTACAGTG  
TCCAAAGGCCTTAGTAAATTATTAACATACCTACAAATCAATTATTAATAGAGCCACCT  
CGGTTACAAAGTGTGGCTGCCGCCATATACTGGTTTATAGATCAGGAATATCTAATGCTAGC  
ATTGTAACCGGAGACACACCAGAGTGGATTCAAAGACAAACAATTTTAGAACATTGTTTTT  
GCAGATGCCCAATTTAATTTAACAGAAATGGTGCAATGGGCATATGATAATGATATTACT  
GAAGACAGTGACATTGCATATGAATATGCACAACGGGCAGACAGGGATAGCAATGCTGCT  
GCATTTTTTAAAAAGTAACTGCCAGGCAAAAATATGTAAAAGATTGTGGCGTCATGTGCAGA  
CATTATAAAAAAGCACAAATGAGACGTATGTCTATGGGTGCATGGATAAAACATAGAAGT  
GCCAAGATAGGGGATAGTGGAGATTGGAACCTATAGTAAAATTTATTAGATATCAACAA  
ATTGATTTTTTAGCATTTTATGTCTGCATTTAAAAAGTTTTTACATAATATACCTAAAAAA  
AGTTGTTTGTGTTAATTGGTCTCCAAATACAGGAAAATCACAGTTTGGAAATGAGTTTA  
ATAAACTTCTTAGCAGGAAGTGAATATCATTTGTAAATTCACATAGCCATTTTTGGCTG  
CAGCCATTGGACAGTGCAAAAATAGCTATGCTGGATGATGCAACTCCACCATGTTGGACA  
TATTTAGATATATATTTAAGAAATTTATTAGATGGCAATCCATGCAGTATAGATAGAAAA  
CATAAAGCATTAACAGTTGTTAAGTGCCACCATTACTTATAACATCAAATACAGATATT

AGAACAAATGACAAATGGAAATACCTATACAGCAGAGTTAGTTTATTTGAATTTCCAAAT  
CCATTTCCATTAGATACAAATGGAAATCCTGTATATGAATTAAATGACAAAAATTGGAAA  
TCATTTTTTCAAAGGTTGTGGTCCAGCTTAGAATTTCAAGAATCAGAGGACGAGGAAGAC  
TATGGAGAGACTGGCCAAACGTTTAGATGCGTGCCAGGAACAGTTGTTAGAACTGTATGA  
GGAAAATAGTAGGGATTTACAAAAACATATTGAACATTGGAAATGTTTACGTATGGAGGC  
AGTGGTATTGTATAAGGCCCGTGAAATGGGCTTTGCAAATATAGGACATCAAATAGTACC  
AACATTGGAAACATGTAGAGCCAAGGCCCACATGGCAATTGAAATACACTTGGCATTAGA  
GACATTATTGCAGTCCTCGTATGGTAAAAGAACCATGGACATTGCAAGAAACAAGTAATGA  
ACTGTGGCTTACGAATCCTAAAAAATGTTTTAAAAAACAAGGACGTACCGTGGAGGTTAT  
ATTTGATGGAAAACAGGACAATGCAATGCATTATACAGCATGGACATATATATATATACA  
AACTGTGCAAGGTACATGGTGTAAAGTACAAGGACACGTTTGCCATGCAGGACTATATTA  
TATTGTGGAAAATATGAAACAGTTTTATTGTAAATTTTAAAGAGGAGGCCAAAAAATATGG  
GGTAACAGACCAATGGGAGGTACATGATGGCAATCAGGTGATTGTTTCTCCTGCACCCAT  
ATCTAGCACCACATCCACCGACGCAGAGATACCTCTACTGGATCTACTAAGTTGGTACA  
ACAAGTGTGCACCACAAACCCATTGCACACCACAACGTCCATTGACAACCACCACGCAGA  
CTGTACAGACGGAACAGCATAACAACGTGCCATCCAAACCTCACCGCCACGAAAACGATA  
CAGACAGTGTGGACAGTCGCCATCACAGCACCTGCAGCACTCAAACCCCAGCATCCCCAG  
CATCCCCAGCGCATCCGTGGACCCTGGATTGTGTGGGGTCAGAACTAACAGTGAAAACGTG  
TAACAAGCGACGGAACCACTGTGGAAAGTCAGGCTACGCCTGTAATTCATTACAAGGTGA  
CCCTAAGTGCCTAAATAGCCTACGATTTAGGCTAAAAAGAAATTTGTTACATTTATTTAC  
ACAGGTGTCTACATACATGGCATTAAACAGAAAATGATTGTACACGTGACACTAAAACCTGG  
TATAATAACAATACATTATTATGATGAAGCACAAAGAAATTTATTTTTAAATACTGTAAA  
AATACCTTCTGGGATAAAATCCTGTATTGGATATATGTCTATGTTACAGTTTATATGATT  
AGTTGTATATGTGTATAAACAGTTATAGGACTTCAATACTGTGACTCCACAACGTGTGGG  
ACAACCGGCCAGAACTGCTGCTTTTTATTGTTTATAGTTGTTGGTGCCTGTGTGTGTGT  
GTGTGGATTAGTTTACAAAATTATCCATATCCTGTATGGGCCTCTTGCCCTGCTAGCTAC  
CTAACATTGGTGTCTATTATCATGGTTGCAGGTACTAACATACTTTGACTATTTTTTTCTA  
TGTTTAAATCATCTTGGTATTCTTCTGTCTTACTAACATTACTAATACATTTAGCAATA  
CAATAACACATATTAGTTTAGGTGTGTGTGTGTGGTGTGCATGTGATTTGTACATGGTTG  
TACATATATAATACCAATTATTGTTTGGCTACTATTTTCATTTATAGCCACACTGCTGTT  
TTGCATATTGGTATTACAAACATATAAACTGTTACCATACGTATATACAGTGCTGTAAAT  
AAACTTTTGTATATTGTGTGTACTTCTTTTGTGCTATTACAATGCCACCACAACGGTCC  
CGCAGACGAAAGCGGGCCTCTGCCACACAATTATATCAAACGTGTAAGGCCTCAGGGACA  
TGTCCTCCAGATGTTATTCCCAAAGTTGAAGGAACCACATTGGCAGATAAAATTTTACAA  
TGGGGTAGTTTtaggCGTGTTTTTTGGGGGGTTGGGAATTGGCACTGGTGCAGGTACGGGT  
GGGCGCACGGGCTATGTGCCTCTGGGAACAAGGCCTCCTGTAATTGCTGAACCAGGACCT  
GCAGTACGCCCACCAATAGCTGTTGACACCGTGGGGCCATCTGATCCTTCTATTGTTTCC  
TTATTAGAAGAGTCATCAGTTATTGATGCAGGAATAACAGTACCTGATATTACTTCTCAT  
GGAGGTTTTAATATTACTACATCTACTGGTGGGCCTGCCTCAACGCCTGCTATATTAGAT  
ATCTCCCCCTCCCACCTAATACTATACGTGTCACAACAACCTACATCTACCAATCCTTTATAT  
ATTGATCCTTTTACATTGCAGCCGCCATTGCCAGCAGAGGTTAATGGGCGCCTATTAATA  
TCTACTCCTACCATCACACCCCACTCATATGAAGAAATACCAATGGACACGTTTGTGTGA  
TCTACAGATACAACCTAACACATTTACTAGTACTCCCATTCCTGGCCCTCGGTCTGTGCA  
CGCCTGGGGTTATATTCTAGAGCAACGCAACAACGTCCAGTTACTACCAGTGCATTTTTTA  
ACATCTCCTGCACGGTTGGTTACTTATGACAAATCCAGCCTATGAAGGACTTACGGAGGAT  
ACATTAGTATTTGAACATCCATCCATTCTACTGCACCTGACCCTGATTTTCATGGATATA  
GTTGCATTGCATCGTCCTATGTTATCATCCAAACAGGGTAGTGTACGTGTTAGTAGAATT  
GGACAAAGGCTGTCTATGATGACACAGTCGCGGGACCCGTTTTTGGGTACGTGTACACTTT  
TTTCATGACCTTAGCCCTATTACACACTCTTCAGAAACTATTGAATTACAGCCTTTATCT  
GCTTCTTCAGTATCTGCAGCCTCCAATATTAATGATGGGTTATTTGATATTTATGTTGAT  
ACTAGTGATAAATGTTACAAATACCACCTTCTCTATACCTATGCATGGTTTTTGCTACC  
CCCCGTTTTGTCCACTACATCTTTCCCTACATTACCTAGCATGTCTACACATTCTGCCAAT  
ACCACCATACCTTTTTTCGTTTTCTGCCACTGTGCATGTGGGCCCTGATTTATCTGTTGTG  
GACCACCATGGGACAGTACCCCAACGTCTGTAATGCCTCAGGGTAACTTTGTAATGGTA  
TCAGGATGGGATTTTATATTGCATCCTAGTTATTTTTTGGCGTAGGCGCCGTAAACCTGTA

CCATATTTTTTTTGCAGATGTCCGTGTGGCGGCCTAGTGACAACAAGGTTTATCTACCTCC  
TCCTCCTGTTTCCAAGGTGGTCAGCACTGATGAATATGTGCAACGCACCAACTACTTTTA  
CCATGCCAGCAGTTCTAGGCTATTGGTTGTTGGTCACCCTTATTACTCTATTACAAAAAG  
GCCAAATAAGACATCTATCCCCAAAGTGTCTGGTTTACAGTACAGAGTATTTAGAGTTAG  
GCTCCCTGATCCTAATAAGTTTACATTGCCTGAAACTAATTTATATAACCCAGAGACACA  
GCGCATGGTGTGGGCCTGTGTGGGGCTAGAAGTAGGTCGTGGACAGCCTTTGGGCGTTGG  
TATTAGTGGCCATCCATTATTGAATAAGTTGGATGATACTGAAAATGCGCCTACATATGG  
TGGAGGCCCTGGTACAGACAATAGGGAAAAATGTTTCTATGGATTATAAAACAAACACAGTT  
GTGTTTAGTTGGCTGTAAACCTGCCATAGGGGAGCACTGGGGTAAAGGTACTGCCTGTAC  
ACCACAGTCCAATGGTGACTGCCCACCATTAGAATTAAAAAATAGTTTTATTTCAGGATGG  
GGATATGGTGGATGTAGGGTTTTGGGGCACTAGATTTTGGTGCTTTACAATCCTCCAAAGC  
TGAGGTACCTTTGGATATTGTAAATTCAAATTAATAATATCCTGATTACTTAAAAATGTC  
TGCTGAGGCCTATGGTGACAGTATGTTTTCTTTTTAAGGCGAGAACAAATGTTTGTTCG  
TCATTTGTTAATAGGGCTGGCGCAATTGGTGAACCTGTACCTGATGAACGTATACCAA  
GGCTGCTAATAATGCATCTGGCAGACATAATTTAGGTAGTAGTATTTATTATCCTACCCC  
TAGTGGTTCTATGGTAACATCTGATGCACAACATTTAATAAAACCATATTGGTTACAACA  
AGCACAAGGACACAATAATGGTATATGTTGGGGAAATCAGCTATTTTTAACTGTGGTTGA  
TACTACCCGTAGTACTAACATGACTTTGTGTGCCACTGCAACATCTGGTGATACATATAC  
AGCTGCTAATTTTAAGGAATATTTAAGACATGCTGAAGAATATGATGTGCAATTTATATT  
TCAATTGTGTAAAAATAACATTAACGTGTGAAGTTATGTGCATATATACACAATATGAATCC  
TAACATATTAGAGGAGTGAATGTTGGTGTGACCACCACCTTCAGGAACTTTAGAAGA  
TAGTTATAGGTATGTACAATCAGAAGCTATTTCGCTGTCAGGCTAAGGTAACAACGCCAGA  
AAAAAAGGATCCTTATTTCAGACTTTTTGGTTTTGGGAGGTAAATTTATCTGAAAAGTTTTT  
TACTGATTTAGATCAATTTCTTTTAGGTAGAAAGTTTTTACTGCAGGCCGGGTTGCGTGC  
AAGGCCTAAACTGTCTGTAGGTAAACGAAAGGCGTCTACAGCTAAATCTGTTTCTTCAGC  
TAAACGTAAGAAAACACACAAATAGATGTATGTAGTAATGTTATGATACATATTTATGTT  
ATTTATTTGTGTACTGTGTAAATAAACTACTTTTTATATGTTGTGTGTTCTCCATTTTGT  
TTTTTGTACTCCATTTTGTCTTAGACCGATTTCGGTTGTATCTGGCCTGTTACCAGGTG  
CATTGGCCATGTTTCCTAACATTTTGCAAACCTATTCACTTTTTAAATTTATAAATGCAA  
TATGTGCTGCCAACTGTTTTATGGCACGTATGTTCTGCCAACGTACACTCCCTAATTCCT  
TTACATAACACACACGCCTTTGCACAGGCATGTGCACAAAGGTTGGCAAAGGTTAGCATA  
TCTCTGCAGTTACCCATTTCTTTTTCTTTTTTTATGTATGAGTAACTTAATTGTTAT  
ATGTAATAAAAAAGCTTTTAGGCACATATTTTCAGTGTGGCATAACATTTACAAGTTA  
CCTTGGCTTAAACAAGTAAAGTTATTTGTCACTGTTGACACATTACTCATATATATAATT  
TGTTTTTAACATGCAGGTGGCAACCGAAACCGGTACATAAATCCTTCTTATTCTTTT  
>gi|333049|gb|M12732.1|PPH33CG\_Human\_papillomavirus\_type\_33,\_complete\_genome  
GTAAACTATAATGCCAAGTTTTTAAAAAGTAGGGTGTAAACCGAAAGCGGTTCAACCGAAA  
ACGGTGCATATATAAAGCAAACATTTTGCAGTAAGGTACTGCACGACTATGTTTCAAGAC  
ACTGAGGAAAAACCACGAACATTGCATGATTTGTGCCAAGCATTGGAGACAACTATACAC  
AACATTGAACTACAGTGCGTGGAATGCAAAAAACCTTTGCAACGATCTGAGGTATATGAT  
TTTGCATTTGCAGATTTAACAGTTGTATATAGAGAGGGAAATCCATTTGGAATATGTAAA  
CTGTGTTTGCGGTTCCTATCTAAAATTAGTGAATATAGACATTATAATTATTCGTATAT  
GGAAATACATTAGAACAACAGTTAAAAAACCTTTAAATGAAATATTAATTAGGTGTATT  
ATATGTCAAAGACCTTTGTGTCCTCAAGAAAAAAAACGACATGTGGATTAAACAAACGA  
TTTCATAATATTTCCGGTTCGTTGGGCAGGGCGCTGTGCGGCGTGTGGAGGTCCCGACGT  
AGAGAACTGCACGTGTGACGTGTAAAAACGCCATGAGAGGACACAAGCCAACGTTAAAGG  
AATATGTTTTAGATTTATATCCTGAACCAACTGACCTATACTGCTATGAGCAATTAAGTG  
ACAGCTCAGATGAGGATGAAGGCTTGGACCGGCCAGATGGACAAGCACAACCAGCCACAG  
CTGATTACTACATTGTAAACCTGTTGTGCACACTTGTAAACACCACAGTTCGTTTATGTGTCA  
ACAGTACAGCAAGTGACCTACGAACCATACAGCAACTACTTATGGGCACAGTGAATATTG  
TGTGCCCTACCTGTGCACAACAATAAACATCATCTACAATGGCCGATCCTGAAGGTACAA  
ATGGGGCTGGGATGGGGTGTACTGGTTGGTTTTGAGGTAGAAGCAGTCATAGAGAGAAGAA  
CAGGAGATAATATTTTCAAGAGATGAGGATGAAACAGCAGATGACAGTGGCACGGATTTAC  
TAGAGTTTATAGATGATTCTATGAAAAATAGTATACAGGCAGACACAGAGGCAGCCCGGG  
CATTGTTTAAATATACAGGAAGGGGAGGATGATTTAAATGCTGTGTGTGCACTAAAACGAA

AGTTTGCCGCATGTTACACAAAGTGCTGCGGAGGACGTTGTTGATCGTGCTGCAAACCCGT  
GTAGAACGTCTATTAATAAAAAATAAAGAATGCACATACAGAAAACGAAAAATAGATGAGC  
TAGAAGACAGCGGATATGGCAATACTGAAGTGGAACCTCAGCAGATGGTACAACAGGTAG  
AAAGTCAAAATGGCGACACAACTTAAATGACTTAGAATCTAGTGGGGTGGGGGATGATT  
CAGAAGTAAGCTGTGAGACAAATGTAGATAGCTGTGAAAATGTTACGTTGCAGGAAATTA  
GTAATGTTCTACATAGTAGTAATACAAAAGCAAATATATTATATAAAATTTAAAGAGGCCT  
ATGGAATAAGTTTTATGGAATTAGTAAGACCATTTAAAAGTGATAAAACAAGCTGTACAG  
ATTGGTGTATAACAGGATATGGAATTAGTCCATCAGTAGCAGAAAGTTTTAAAAGTATTAA  
TTAAACAGCATAGTTTTGTATACTCATTTTACAATGTTTTAACTTGCGATAGAGGAATAATA  
TATTATTGTTAATTAGATTTTAGGTGTAGCAAAAACAGGTTAACAGTAGCAAACTAATGA  
GTAATTTATTATCAATACCTGAAACATGTATGGTTATAGAGCCACCAAAATTACGGAGCC  
AAACATGTGCATTGTATTGGTTTAGAACAGCAATGTCAAACATTAGTGATGTACAAGGTA  
CAACACCTGAATGGATAGATAGACTAACTGTTTTACAACATAGCTTTAATGATAATATAT  
TTGATTTAAGTGAAATGGTACAGTGGGCATATGATAACGAGTTAACGGACGATAGTGACA  
TTGCATATTATTATGCACAACCTGCAGATTCAAATAGTAATGCTGCTGCATTTTTAAAAA  
GTAACTCACAAGCAAAAATAGTAAAGGACTGTGGAATAATGTGTAGACATTATAAAAAAG  
CAGAAAAACGTAAAATGTCAATAGGACAATGGATACAAAGTAGATGTGAAAAACAAATG  
ATGGAGGAAATGGAGACCAATAGTACAGTTGTTAAGATATCAAAACATTGAATTTACAG  
CATTTTATAGGTGCATTTAAAAAGTTTTTAAAAGGTATACCAAAAAAAGCTGTATGCTAA  
TTTGTGGACCAGCAAAATACAGGAAAGTCATATTTTGGGAATGAGTTAATACAGTTTTTTAA  
AAGGGTGTATTATATCATGTGTAAATTTCTAAAAGTCACTTTTGGTTGCAGCCATTATCAG  
ATGCAAAAAATAGGAATGATAGATGATGTAACGCCAATAAGTTGGACATATATAGATGATT  
ACATGAGAAATGCGTTAGATGGAATGAAAATTTCAATAGATGTGAAACATAGGGCATTAG  
TGCAATTAAAAATGTCCACCCTGCTTCTTACCTCAAATACAAATGCAGGCACAGACTCTA  
GATGGCCATATTTACATAGTAGATTAAACAGTATTTGAATTTAAAAATCCATTCCCATTG  
ATGAAAATGGTAACCCAGTGTATGCAATAAATGATGAAAATTGGAAATCCTTTTTCTCAA  
GGACGTGGTGCAAATTAGATTTAATAGAGGAAGAGGACAAGGAAAACCATGGAGGAAATA  
TCAGCACGTTTAAATGCAGTGCAGGAGAAAATACTAGATCTTTACGAAGCTGATAAACT  
GATTTACCATCACAAATTGAACATTGGAACTGATACGCATGGAGTGTGCTTTATTGTAT  
ACAGCCAAACAAATGGGATTTTTCACATTTATGCCACCAGGTGGTGCCTTCTTTGTTAGCA  
TCAAAGACCAAAGCATTTCAAGTAATTGAACTACAAATGGCATTAGAGACATTAAGTAAA  
TCACAGTATAGTACAAGCCAATGGACATTGCAACAAACAAGCTTAGAGGTGTGGCTTTGT  
GAACCACCAAATGTTTTTAAAAACAAGGAGAAACAGTAACTGTGCAATATGACAATGAC  
AAAAAAAATACAATGGATTATACAACTGGGGTGAAATATATATTATAGAGGAAGATACA  
TGTACTATGGTTACAGGGAAAGTAGATTATATAGGTATGTATTATATACATAACTGTGAA  
AAGGTATATTTTAAATATTTTAAAGAGGATGCTGCAAAGTATTCTAAAACACAAATGTGG  
GAAGTACATGTGGTGGTCAGGTAATTGTTTGTCTACGTCTATATCTAGCAACCAAATA  
TCCACTACTGAACTGCTGACATACAGACAGACAACGATAAACCGACCACCACAAGCAGCG  
GCCAAACGACGACGACCTGCAGACACCACAGACACCGCCAGCCCCCTTACAAAGCTGTTT  
TGTGCAGACCCCGCCTTGGAACAATAGAACAGCACGTAAGTGCACAACTAAGTGCACAAACA  
CAGCGGACTGTGTGTAGTTCTAACGTTGCACCTATAGTGCATTTAAAAGGTGAATCAAAT  
AGTTTAAAAATGTTTAAAGATACAGATTA AAAACCTTATAAAGAGTTGTATAGTTCTATGTCA  
TCCACCTGGCATTTGGACAGTGACAACAAAAATAGTAAAAATGGAATTGTAACGTGAACA  
TTTGTAACGTGAACAGCAACAACAAATGTTTTTAGGTACCGTAAAAATACCACCTACTGTG  
CAAATAAGTACTGGATTTATGACATTATAAGTGTACATCACAAGCCAATATGTGCTGCTA  
ATTGTATATAACCATGATATTTGTTTTTGTATTATGTTTTATATTGTTTTATGCTTATC  
CTTATTATTACGTCCTTTAATACTTTCCATTTCTACCTATGCTTGGTTGCTGGTGTGGT  
ATTGCTGCTTTGGGTGTTTGTGGGATCTCCTTTAAAATTTTTTTTTTGGCTATTTGTTGTT  
TTTATATTACCAATGATGTGTATTAATTTTCATGCACAGCATATGACACAACAAGAGTA  
ATGTATATACATGTATATATTGTTTGTATATATGTGCACATGGTGGTGTTTAACATTGT  
TGTTGTTATTTTAGTTTTTTTTTTTTTGTATATACTAATAAATACCTTTATATTTTAGCAG  
TGTATTATTATGAGACACAAACGATCTACAAGGCGCAAGCGTGATCTGCAACACAACCTA  
TACCAAAACATGCAAGGCCACAGGCACCTGCCCACCCGATGTTATTCTTAAAGTGGAAGGA  
AGTACCATAGCAGATCAAATTTCTTAAATATGGCAGTTTAGGGGTTTTTTTTTGGTGGTTTA  
GGTATTGGCACAGGCTCTGGTTCAGGTGGAAGGACTGGCTATGTACCTATTGGTACTGAC

CCACCTACAGCTGCAATCCCCTTGCAGCCTATACGTCCTCCGGTACTGTAGACACTGTT  
GGACCTTTAGACTCGTCTATAGTGTCATTAATAGAAGAAACAAGTTTTATAGAGGCAGGT  
GCACCAGCCCCATCTATTCCCTACACCATCAGGTTTTGATGTTACTACATCTGCAGATACT  
ACACCTGCAATTATTAATGTTTTCATCTGTTGGGGAGTCATCTATTCAAACCTATTTCTACA  
CATTTAAATCCCACATTTACTGAACCATCTGTACTACACCCTCCAGCGCCTGCAGAAGCC  
TCTGGACATTTTATATTTTCTTCCCCTACTGTTAGCACACAAAGTTATGAAAACATACCA  
ATGGATACCTTTGTTGTTTCCACAGACAGTAGTAATGTAACATCAAGCACGCCCATTTCCA  
GGGTCTCGCCCTGTGGCACGCCTTGGTTTATATAGTCGCAATACCCAACAGGTTAAGGTT  
GTTGACCCTGCTTTTTTAAACATCGCCTCATAACTTATAACATATGATAATCCTGCATTT  
GAAAGCTTTGACCCTGAAGACACATTACAATTTCAACATAGTGATATATCACCTGCTCCT  
GATCCTGACTTTCTAGATATTATTGCATTACATAGGCCTGCTATTACATCTCGTAGACAT  
ACTGTGCGTTTTAGTAGAGTAGGTCAAAAAGCCACACTTAAACTCGCAGTGGTAAACAA  
ATTGGAGCTAGAATACATTATTATCAGGATTTAAGTCCTATTGTGCCTTTAGACCACACC  
GTGCCAAATGAACAATATGAATTACAGCCTTTACATGATACTTCTACATCGTCTTATAGT  
ATTAATGATGGTTTGTATGATGTTTATGCTGACGATGTGGATAATGTACACACCCCAATG  
CAACACTCATACAGTACGTTTGAACAACACGTACCAGCAATGTGTCTATACCTTTAAAT  
ACAGGATTTGATACTCCTGTTATGTCTGGCCCTGATATACCTTCCCCTTTATTTCCCACA  
TCTAGCCCATTTGTTCCCTATTTTCGCTTTTTTTCCTTTTGACACCATTGTTGTAGACGGT  
GCTGACTTTGTTTTACATCTAGTTATTTATTTTACGTGCGAGGCGTAAACGTTTTTCCA  
TATTTTTTTACAGATGTCCGTGTGGCGGCCCTAGTGAGGCCACAGTGTACCTGCCTCCTGT  
ACCTGTATCTAAAGTTGTGTCAGCACTGATGAATATGTGTCTCGCACAAAGCATTTATTATTA  
TGCTGGTAGTTCCAGACTTCTTGCTGTTGGCCATCCATATTTTTTCTATTAAAAATCCTAC  
TAACGCTAAAAAATTATTGGTACCCAAAAGTATCAGGCTTGCAATATAGGGTTTTTtagggT  
CCGTTTACCAGATCCTAATAAATTTGGATTTTCCTGACACCTCCTTTTTATAACCCTGATAC  
ACAACGATTAGTATGGGCATGTGTAGGCCTTGAAATAGGTAGAGGGCAGCCATTAGGCGT  
TGGCATAAGTGGTCATCCTTTATTAACAACAAATTTGATGACACTGAAACCGGTAACAAGTA  
TCCTGGACAACCGGGTGCTGATAATAGGGAATGTTTATCCATGGATTATAAACAACACA  
GTTATGTTTACTTGGATGTAAGCCTCCAACAGGGGAACATTGGGGTAAAGGTGTTGCTTG  
TACTAATGCAGCACCTGCCAATGATTGTCCACCTTTAGAACTTATAAATACTATTATTGA  
GGATGGTGATATGGTGGACACAGGATTTGGTTGCATGGATTTTAAACATTGCAGGCTAA  
TAAAGTGATGTTCCCTATTGATATTTGTGGCAGTACATGCAAATATCCAGATTATTTAAA  
AATGACTAGTGAGCCTTATGGTGATAGTTTATTTTTCTTTCTTCGACGTGAACAAATGTT  
TGTAAGACACTTTTTTAATAGGGCTGGTACATTAGGAGAGGCTGTTCCCGATGACCTGTA  
CATTAAAGGTTTCAGGAATACTGCCTCTATTCAAAGCAGTGCTTTTTTTCCCACTCCTAG  
TGGATCAATGGTTACTTCCGAATCTCAGTTATTTAATAAGCCATATTGGCTACAACGTGC  
ACAAGGTCATAATAATGGTATTTGTTGGGGCAATCAGGTATTTGTTACTGTGGTAGATAC  
CACTCGCAGTACTAATATGACTTTATGCACACAAGTAAGTACTAGTGACAGTACATATAAAAA  
TGAAAATTTTAAAGAATATATAAGACATGTTGAAGAATATGATCTACAGTTTGTTTTTCA  
ACTATGCAAAGTTACCTTAACTGCAGAAAGTTATGACATATATTCATGCTATGAATCCAGA  
TATTTTtagaagATTGGCAATTTGGTTTAAACACCTCCTCCATCTGCTAGTTTACAGGATAC  
CTATAGGTTTGTACCTCTCAGGCTATTACGTGTCAAAAAACAGTACCTCCAAAGGAAAA  
GGAAGACCCCTTAGGTAAATATACATTTTGGGAAGTGGATTTAAAGGAAAAATTTTCAGC  
AGATTTAGATCAGTTTCCTTTGGGACGCAAGTTTTTTATTACAGGCAGGTCTTAAAGCAAA  
ACCTAAACTTAAACGTGCAGCCCCCACATCCACCCGCACATCGTCTGCAAAACGCAAAAA  
GGTTAAAAAATAACACTTTGTGTAATTGTGTTATGTTGTTGTTTGTCTGTCTATGTAC  
TTTGTGTTGTTGTGTTGTGTTGTTGTTGTTTTTGTGTATGTGTTACAATGTATGTTAT  
GTTGTATGTTACTGTGTTTGTGTTTATGTGTACTTGTGTTGTGTGCATGTTCTATGTACTTG  
TCAGTTTCCTGTTTGTGTATATGTTAATAAAACATTGTGTGTATTTGTTAAACTATTTGT  
ATGTATGTTATGTATATGGGTGTACCTATATGAGTAAGGAGTTGTATTGCTTGCCCTACC  
CTGCATTGCAATGTACCTACCTTATTTCCCTATATTTGTAGTACCTACATGTTTAGTAT  
TGCTTTACCTTTTGACATACTAGTGTCATATTGTACAATTTCCCTCCATTTTGTATGCCT  
AACCCTTTTTCGGTTACTTGGCATAACATACCCTATGACATTGGCAGAACAGTTAATCCTTT  
TCTTTCTGCACTGTGTTTGTCTGTACTTGCTGCATTGGCATAACATACCCTATGACATTG  
GCAGAACAGTTAATCCTTTTTCTTTCTGCACTGTGTTTGTCTGTACTTGCTGCATTGACT  
CATATATACATGCAGTGCAATTGCAAAAATACTTAATTGTACTAATAGTTTACACATGCTT

TTAGGCACATATTTTTACTTTACTTTCAAACCTTAAGTGCAGTTTTGGCTTACACAATTG  
CTTTGTATGCCAAACTATGCCTTGTAAGTGAGTCACTACCTGTTTATTACCAGGTGTG  
GACTAACCGTTTTAGGTCATATTGGTCATTATAATCTTTTATATAATA  
>gi|333048|gb|J04353.1|PPH31A\_Human\_papillomavirus\_type\_31\_(HPV-  
31)\_complete\_genome  
TAATAATAATAATCTTAGTATAAAAAAGTAGGGAGTGACCGAAAGTGGTGAACCGAAAAC  
GGTTGGTATATAAAGCACATAGTATTTTGTGCAAACCTACAGACGCCATGTTCAAAAATC  
CTGCAGAAAAGACCTCGGAAATTGCATGAACTAAGCTCGGCATTGGAAATACCCTACGATG  
AACTAAGATTGAATTGTGTCTACTGCAAAGGTCAGTTAACAGAAAACAGAGGTATTAGATT  
TTGCATTTACAGATTTAACAATAGTATATAGGGACGACACACCACACGGAGTGTGTACAA  
AATGTTTAAAGATTTTATTCAAAAAGTAAAGTGAATTTAGATGGTATAGATATAGTGTGTATG  
GAACAACATTAGAAAAATTGACAAACAAAGGTATATGTGATTTGTTAATTAGGTGTATAA  
CGTGTCAAAGACCGTTGTGTCCAGAAGAAAAACAAAGACATTTGGATAAAAAAGAAACGAT  
TCCACAACATAGGAGGAAGGTGGACAGGACGTTGCATAGCATGTTGGAGAAGACCTCGTA  
CTGAAACCCAAGTGTAACATGCGTGGAGAAAACACCTACGTTGCAAGACTATGTGTTAGA  
TTTGCAACCTGAGGCAACTGACCTCCACTGTTATGAGCAATTACCCGACAGCTCAGATGA  
GGAGGATGTCATAGACAGTCCAGCTGGACAAGCAGAACCGGACACATCCAATTACAATAT  
CGTTACCTTTTGTGTGTCAGTGTAAAGTCTACACTTCGTTTGTGTGTACAGAGCACACAAGT  
AGTATTTCGCATATTGCAAGAGCTGTTAATGGGCTCATTGGAATCGTGTGCCCCAACTG  
TTCTACTAGACTGTAACTACAATGGCTGATCCAGCAGGTACAGATGGGGAGGGGACGGGA  
TGCAATGGTTGGTTTTATGTAGAAGCAGTAATTGACAGACAGACAGGGGACAACATTTCA  
GAGGACGAAAAATGAAGACAGTAGTGATACTGGGGAGGATATGGTTGACTTTATTGACAAT  
TGTAATGTATACAACAATCAGGCAGAAGCAGAGACAGCACAGGCATTGTTTCATGCACAG  
GAAGCGGAGGAACATGCAGAGGCTGTGCAGGTTCTAAAACGAAAAGTATGTAGGTAGTCCT  
TTAAGTGATATTAGTAGTTGTGTGGATTATAATATTAGTCCACGGTTAAAAGCTATATGC  
ATAGAAAAATAACAGTAAAACAGCAAAACGAAGACTCTTTGAACTTCCAGACAGCGGGTAT  
GGCAATACTGAAGTGGAACGCAGCAGATGGTACAGGTAGAGGAGCAACAAACAACATTA  
AGTTGTAATGGTAGTGACGGGACACATAGTGAACGAGAGAATGAACTCCAACACGTAAT  
ATATTGCAAGTGTTAAAACTAGCAATGGTAAAGCTGCTATGTTAGGTAAATTTAAAGAA  
TTATATGGTGTAAGTTTTATGGAACATAATTAGGCCATTTCAAAGCAATAAAAGCACATGT  
ACTGATTGGTGTGTAGCTGCGTTTGGAGTTACAGGTACAGTTGCAGAAGGATTTAAAACC  
CTATTGCAACCATATTGTTTGTATTGCCATTTACAAAGTTTAGCATGTTCTGGGGCATG  
GTTATGTTAATGCTTGTGAGATTTAAATGTGCAAAAATAGAATAACAATTGAAAAATTA  
TTAGAAAAATTATTGTGTATATCTACAAATTGTATGTTAATTCAGCCACCCAAATTACGT  
AGCACAGCTGCAGCATTATATTGGTACAGAACAGGAATGTCAAACATTAGCGATGTATAT  
GGTGAAACACCAGAATGGATAGAAAGACAAACAGTATTACAGCATAGTTTAAATGACACA  
ACATTTGATTTGTCCCAAATGGTACAATGGGCATATGACAATGATGTTATGGATGATAGT  
GAAATTGCCCTATAAATATGCACAATTAGCTGACAGTGATAGTAATGCATGTGCATTTTTTA  
AAAAGTAATTCGCAGGCAAAAATAGTTAAAAGATTGTGGAACAATGTGTAGACATTATAAA  
CGAGCAGAAAAACGACAAATGTCCATGGGACAGTGGATTAAAAGTAGATGTGACAAAGTT  
AGTGACGAAGGTGACTGGAGGGACATAGTAAAGTTTTTAAAGATATCAACAAATAGAATTT  
GTGTCATTTTTATCTGCATTAAAGCTGTTTTTAAAAGGAGTGCCAAAGAAAAAACTGTATT  
TTAATACATGGTGCACCTAATACAGGTAAATCATATTTTGGAATGAGCCTTATTAGCTTT  
TTACAAGGATGTATAATATCATATGCAAATTCAAAAAGTCATTTTTGGTTACAACCACTG  
GCTGATGCTAAAAATAGGCATGTTAGATGATGCTACAACGCCATGTTGGCATTATATAGAC  
AATTACCTACGAAATGCACTAGATGGCAACCTGTATCTATAGATGTAAAGCATAAAGCT  
TTAATGCAGTTAAAATGTCCTCCTTTATTGATTACATCTAATATAAATGCAGGTAAGGAT  
GACAGATTGGCCATACCTACATAGCAGACTGGTGGTTTTTACATTTCCAAATCCATTTCCA  
TTTGACAAAAACGGAATCCAGTATATGAATTAAGTGATAAAAACTGGAAATCCTTTTTTC  
TCAAGGACCTGGTGCAGATTAATAATTGCAAGGAGGAAGAGGACAAAGAAAAACGATGGAGAC  
TCTTTCTCAACGTTTTAAATGTGTGTCAGGACAAAATATTAGAACATTATGAAAATGATAG  
TAAACGACTTTGTGATCATATAGACTATTGGAAACATATTGCACTTGAATGTGTATTAAT  
GTATAAAGCAAGAGAAATGGGAATACACAGTATTAACCACCAGGTGGTGCCAGCGTTGTC  
AGTATCAAAAGGCCAAAGCCTTACAAGCTATTGAACTACAAATGATGTTGGAAACATTTAA  
TAACACTGAATACAAAAATGAGGACTGGACAATGCAGCAAACAAGTCTTGAACGTGATTT

AACTGCACCTACAGGGTGTTTAAAAAACATGGATATACTGTAGAGGTGCAATTTGATGG  
TGATGTACACAACACCATGCATTATACTAACTGGAAATTTATATACCTATGTATAGATGG  
CCAATGTACTGTTGTGGAAGGGCAAGTTAATTGTAAGGGCATTATTATGTACATGAAGG  
ACATATAACATATTTTGTAAATTTTACAGAAGAGGCCAAAAAATATGGGACTGGTAAAAA  
ATGGGAAGTGCATGCGGGTGGTCAGGTAATTGTTTTTCTGAATCTGTATTTAGCAGTGA  
CGAAATATCCTTTGCTGGGATTGTTACAAAGCTACCAACAGCCAACAACACCACCACATC  
GAATTCCAAAACCTGCGCCTTGGGCACCAGTGAAGGTGTGCGGCGGGCGACGACGTCTAC  
TAAGCGACCAAGAACAGAGCCAGAGCACAGAAACACCCACCACCCCAACAAGTTGTTGCG  
AGGCGACTCCGTGGACAGTGTCAACTGTGGGGTTATCAGTGCAGCTGCATGCACAAACCA  
AACAAGGGCTGTCAGTTGTCCTGCAACTACACCTATAATACACTTAAAAGGTGATGCAAA  
TATATTAAAAATGTTTAAAGATATAGGCTGTCAAAATATAAACAATTGTATGAACAAGTGTC  
ATCTACATGGCATTGGACATGTACAGATGGAAAACATAAAAAATGCTATTGTAACCTTAAC  
ATATATAAGTACATCACAAAGAGACGATTTTTTAAATACTGTAAAAATACCTAACACAGT  
ATCAGTGTCAACAGGATATATGACTATTTAGCCTAATGATTGAACTAAATATTTCTACAG  
TAAGCATTGTGCTATGCTTTTTGCTTTGCTTTGTGTGCTACTATTTGTGTGCTTTGTCA  
TACGTCCACTTGTGCTGTCTGTGTGCGGTATATGCAACACTACTATTATTAATTGTGATTT  
TATGGGTATTGCAACCTCTCCATTACGTTGTTTTTGTATATATGTTGTGTTTATATATA  
TTCCATTATTTGTAATTCATACACATGCATCTTTTTTAAAGTCAACAGTAACTTTTTTACT  
TGTGTATATCTGTTGTTTTTTTGGTATTGGTATTGGTATTGGTATTGGTATTGGTATAAT  
AAACTTTTTTACTTTTTTTTTTATTATTATACCATTGCGGTCCAAACGCTCTACAAAACGCACT  
AAACGTGCGCTGCTACACAATTATATCAAACATGTAAAGCAGCAGGTACTTGTCCATCA  
GACGTTATACCTAAAATAGAACATACTACCATTGTCAGACCAAATATTAAGGTATGGTAGT  
ATGGGTGTTTTTTTTTGGTGGGTGGGTATTGGGTCCGGCTCTGGTACTGGGGGTGCGCACT  
GGATATGTCCCTCTTAGTACACGTCCCTTCTACAGTATCTGAGGCAAGTATACCTATTAGA  
CCACCAGTTAGCATTGACCCTGTAGGTCCCTTGGACCCCTCTATAGTAAGTCTTGTTGAA  
GAATCTGGAATTGTTGATGTTGGTGCCCTGCTCCTATACCACACCCCTCCTACAACATCT  
GGGTTTGACATTGCTACAACCTGCAGACACAACACCTGCAATTTTAGATGTAACAAGTGTT  
AGCACACATGAAAATCCTACTTTTACTGATCCATCTGTATTGCAGCCTCCTACACCTGCA  
GAAACATCAGGTCATTTACTACTTTTCATCATCATCTATTAGCACACATAATTATGAGGAA  
ATACCTATGGATACATTTATTGTTTCTACTAATAATGAAAACATAACAAGTAGCACACCC  
ATTCCAGGGGTGCGCCGCTCTGCACGTTTAGGGTTATATAGTAAGGTACACAACAAGTA  
AAAGTTATTGATCCAACGTTTCTTAGTGCTCCAAAACAGCTAATTACATATGAAAACCCT  
GCCTATGAAACTGTAAATGCTGAAGAATCTTTATACTTTTCCAATACATCGCATAATATA  
GCCCCGTATCCCGACTTTCTAGATATTATAGCATTACATAGGCCTGCCCTTACCTCACGT  
AGGAACACTGTTAGATATAGTAGACTAGGTAATAAACAACCTTTGCGCACTCGTAGTGGT  
GCTACTATTGGTGCAAGGGTGCATTATTATTATGATATTAGTAGTATTAATCCTGCAGGT  
GAAAGTATTGAAATGCAACCTTTAGGGGCGTCTGCAACTACTACTTCTACTTTAAATGAT  
GGCTTATATGACATTTATGCAGACACTGATTTTACTGTGGATACACCTGCCACACATAAT  
GTTTCCCCCTTCTACTGCTGTACAGTCCACATCTGCTGTGTCTGCCTATGTACCTACAAAT  
ACCACTGTGCCACTAAGTACAGGTTTTGACATTCCCATATTTTCTGGGCCTGATGTACCT  
ATAGAGCATGCACCTACACAGGTTTTCCCATTTCCCTTTGGCCCCCTACAACGCCACAAGTG  
TCTATTTTTGTGATGGGGTGATTTTTTATTTGCACCCTAGTTATTATATGTTAAAACGT  
CGACGTAAACGTGTATCATATTTTTTTTACAGATGTCTCTGTGGCGGCCTAGCGAGGCTAC  
TGTCTACTTACCACCTGTCCCAGTGTCTAAAGTTGTAAGCACGGATGAATATGTAACACG  
AACCAACATATATTATCACGCAGGCAGTGCTAGGCTGCTTACAGTAGGCCATCCATATTA  
TTCCATACCTAAATCTGACAATCCTAAAAAATAGTTGTACCAAAGGTGTCAGGATTACA  
ATATAGGGTATTTAGGGTTGTTTTACCAGATCCAAACAAATTTGGATTTCCTGATACATC  
TTTTTATAATCCTGAACTCAACGCTTAGTTTGGGCCCTGTGTTGGTTTAGAGGTAGGTCG  
CGGGCAGCCATTAGGTGTAGGTATTAGTGGTCATCCATTATTAATAAATTTGATGACAC  
TGAAAACCTTAATAGATATGCCGGTGGTCCCTGGCACTGATAATAGGGAATGTATATCAAT  
GGATTATAAACAAACACAACCTGTGTTTACTTGGTTGCAAACCACCTATTGGAGAGCATTG  
GGGTAAAGGTAGTCCCTGTAGTAACAATGCTATTACCCCTGGTGATTGTCCCTCCATTAGA  
ATTAAAAAATTCAGTTATACAAGATGGGGATATGGTTGATACAGGCTTTGGAGCTATGGA  
TTTTTACTGCTTTTACAAGACACTAAAAGTAATGTTCCCTTTGGACATTTGTAATTCTATTTG  
TAAATATCCAGATTATCTTAAAATGGTTGCTGAGCCATATGGCGATACATTATTTTTTTTA

TTTACGTAGGGAACAAATGTTTGTAAAGGCATTTTTTTAATAGATCAGGCACGGTTGGTGA  
ATCGGTCCCTACTGACTTATATATTAAAGGCTCCGGTTCAACAGCTACTTTAGCTAACAG  
TACATACTTTCCTACACCTAGCGGCTCCATGGTTACTTCAGATGCACAAATTTTTAATAA  
ACCATATTGGATGCAACGTGCTCAGGGACACAATAATGGTATTTGTTGGGGCAATCAGTT  
ATTTGTTACTGTGGTAGATACCACACGTAGTACCAATATGTCTGTTTGTGCTGCAATTGC  
AAACAGTGATACTACATTTAAAAGTAGTAATTTTAAAGAGTATTTAAGACATGGTGAGGA  
ATTTGATTTACAATTTATATTTTCAGTTATGCAAAATAACATTATCTGCAGACATAATGAC  
ATATATTCACAGTATGAATCCTGCTATTTTGGAAAGATTGGAATTTTGGATTGACCACACC  
TCCCTCAGGTTCTTTGGAGGATACCTATAGGTTTGTACCTCACAGGCCATTACATGTCA  
AAAAACTGCCCCCAAAAGCCCAAGGAAGATCCATTTAAAGATTATGTATTTTGGGAGGT  
TAATTTAAAAGAAAAGTTTCTGCAGATTTAGATCAGTTTCCACTGGGTCGCAAATTTTT  
ATTACAGGCAGGATATAGGGCACGTCTAAATTTAAAGCAGGTAAACGTAGTGCACCCTC  
AGCATCTACCACTACACCAGCAAAACGTAAAAAACTAAAAAGTAATGGATGTGTATGTA  
ATACATGTGTCTGTATGTGTATGTGCTTGTGCTGTATTGTATATGTGTGTGTTGTGTGT  
TATATATGGTATATGTATGTTTATGTATGCGTGTGTACTTGTATATATGTATAGTATGTT  
ATGTGTGTATGTATGCTATGTATGTTAATAAATATGTGTATACCTGTGTGTGTTGTGTAT  
GTTGTCTTATATACACCCTATTAGTAACATACTATTACTATTTTATAAACTATTGTTCC  
TACTTGTTCCTACTTGTTCCTGCTCCTCCCAATAGTCATGTACTTATTTCTGCCTATAAT  
TTAGGTGTACGCCATAGTAAAAGTTGTACACCCGGTCCGTTTTTTTGCAACTAAAGCTAC  
TCCATTTTGATTTTATGCAGCAATTTTAAATCCCTAACCGTTTTTCGGTTGCATTGTTTAA  
ACATGTTAGTACAACATATGCTGATGCAGTAGTTCTGCGGTTTTTGGTTTCCTGAATACTA  
GTTTTTGCCAACATTCTGGCTTGTAGTTTCTGCTAACACACCTTGCCAACATATAATC  
CAGTCCAACCTTGCAATTATACTATGAATCATGTTTGTTTAAATACAACGTAGTTCAAC  
TATGTGTCATGCACATATATTATATTATCCTACACACCTTAAACTGCTTTTAGGCACATA  
TTTTGTAGATTATCTATATCCTTGATTGCAGTGCTGGCTTTTGACATGTTTAAACTGCC  
AAGGTTGTGTCATGCATTATAAATAAGTTGTATGTTACTCATATAATTAATTGCATATAG  
GTATTACACCGTTTTCGGTTACAGTTTACAAGCAATTGTTCTTTTTTATACT

>gi|333026|gb|M14119.1|PPH11\_Human\_papillomavirus\_type\_11\_(HPV-  
11)\_complete\_genome

CTTAATAACAATCTTAGTTTAAAAAAGAGGAGGGACCGAAAACGGTTCAACCGAAAACGGTTATATATAA  
ACCAGCCCCAAAAATTAGCAGACGAGGCATTATGGAAAGTAAAGATGCCTCCACGTCTGCAACATCTATA  
GACCAGTTGTGCAAGACGTTTAAATCTTTCTTTGCACACTCTGCAAATTCAGTGCGTGTGTTTGCAGGAATG  
CACTGACCACCGCAGAGATATATGCATATGCCTATAAGAACCTAAAGGTTGTGTGGCGAGACAACCTTCC  
CTTTGCAGCGTGTGCCTGTTGCTTAGAACTGCAAGGGAAAATTAACCAATATAGACACTTTAATTATGCT  
GCATATGCACCTACAGTAGAAGAAGAAACCAATGAAGATATTTTAAAAGTGTTAATTCGTTGTTACCTGT  
GTCACAAGCCGTTGTGTGAAATAGAAAACTAAAGCACATATTGGGAAAGGCACGCTTCATAAACTAAA  
TAACCAAGTGGAAGGGTCGTTGCTTACACTGCTGGACAACATGCATGGAAGACTTGTTACCCTAAAGGATA  
TAGTACTAGACCTGCAGCCTCCTGACCTGTAGGGTTACATTGCTATGAGCAATTAGAAGACAGCTCAGA  
AGATGAGGTGGACAAGGTGGACAAAACAAGACGCACAACCTTTAACACAACATTACCAAATACTGACCTGT  
TGCTGTGGATGTGACAGCAACGTCCGACTGGTTGTGGAGTGCACAGACGGAGACATCAGACAACCTACAAG  
ACCTTTTGTGTTGGGCACACTAAATATTGTGTGTCCCATCTGCGCACCAAAAACCATAACAAGGATGGCGGAC  
GATTCAGGTACAGAAAATGAGGGGTGCGGGGTGTACAGGATGGTTTATGGTAGAAGCCATAGTAGAGCACA  
CTACAGGTACACAAATATCAGAAGATGAGGAAGAGGAGGTGGAGGACAGTGGGTATGACATGGTGGACTT  
TATTGATGACAGGCATATTACACAAAATCTGTGGAAGCACAGGCATTGTTTAAATAGGCAGGAGGCGGAT  
GCTCATTATGCGACTGTGCAGGACCTAAAACGAAAGTATTTAGGCAGTCCATATGTAAGTCCTATAAGCA  
ATGTAGCTAATGCAGTAGAAAGTGAGATAAGTCCACGGTTAGACGCCATTAACTTACAACACAGCCAAA  
AAAGGTAAAGCGACGGCTGTTTGAAACACGGGAATTAACGGACAGTGGATATGGCTATTCTGAAGTGGAA  
GCTGCAACGCAGGTAGAGAAACATGGCGACCCGGAAATGGGGGAGATGGTCAGGAAAGGGACACAGGGA  
GGACATAGAGGGTGAGGGGTGGAACATAGAGAGGCGGAAGCAGTAGACGACAGCACCCGAGAGCATGTC  
AGACACATCAGGAATATTAGAATTACTAAAAATGTAAGGATATACGATCTACATTACATGGTAAGTTTAA  
GACTGCTTTGGGCTGTCATTTGTTGATTAAATTAGGCCATTTAAAAGTGATAGAACCACATGTGCCGATT  
GGGTGGTTGCAGGATTTGGTATACATCATAGCATAGCAGATGCATTTCAAAAGTTAATTGAGCCATTAAG  
TTTATATGCACATATACAATGGCTTACAAATGCATGGGGAATGGTACTATTAGTATTAATAAGGTTTAA  
GTAAATAAGAGCAGATGTACCGTGGCACGTACATTAGGTACGTTATTAAATATACCTGAAAATCACATGT  
TAATTGAGCCTCCTAAATACAAAGTGGCGTACGAGCCCTGTATTGGTTTAGGACAGGCATTTCAAATGC



AAGTACAGTTATAGGGGAGGCGCCGGAATGGATAACGCGCCAGACCGTTATTGAACATAGTTTGGCTGAC  
AGTCAATTTAAATTAACCTGAAATGGTGCAGTGGGCATATGATAATGATATTTGTGAAGAAAGTGAGATAG  
CATTTGAATATGCACAGCGTGGAGACTTTGACTCCAATGCAAGGGCCTTTTAAATAGTAATATGCAGGC  
TAAATATGTAAAAGATTGTGCAATTATGTGCAGACATTATAAACATGCAGAAATGAAAAAGATGTCTATT  
AAACAATGGATTAAGTATAGGGGTACTAAAGTTGACAGTGTAGGTAACCTGGAAGCCAATTGTGCAGTTTC  
TAAGACATCAAAACATAGAATTTATTCCATTTTAAAGCAAACCTAAAATTATGGCTGCACGGAACGCCCAA  
AAAAAATTGTATAGCCATTGTAGGGCCACCTGACACTGGGAAGTCGTGCTTTTGCATGAGTTTAATTAAG  
TTTTTGGGGGGAACAGTTATTAGTTATGTTAATTCCTGCAGCCATTTCTGGCTACAGCCACTAACGGATG  
CAAAAGTGGCATTATTGGATGATGCCACACAACCATGTTGGACATATATGGATACATATATGAGAAAACCT  
ATTAGATGGTAATCCTATGAGCATAGATAGAAAACATAGAGCATTAACATTAATTAAGTGTCCACCGCTA  
CTGGTTACATCAAATATAGACATTAGCAAAAGAGGAGAAATACAAATATTTACATAGTAGAGTTACCACAT  
TTACATTTCCAAATCCATTCCCCTTTGACAGAAATGGGAATGCAGTATATGAACTATCAGATGCAAACTG  
GAAATGTTTCTTTGAAAGACTGTGCTCCAGCCTAGACATTGAGGATTCAGAGGACGAGGAAGATGGAAGC  
AATAGCCAAGCGTTTAGATGCGTGCCAGGATCAGTTGTTAGAACTTTATGAAGAAAACAGTATTGATATA  
CACAAACACATTATGCATTGGAAATGCATACGATTGGAAAGTGTATTACTACACAAAGCAAAACAAATGG  
GCCTGAGCCACATCGGGTTACAAGTAGTACCACCATTAACCTGTGTGCAGAGACTAAAGGACATAATGCTAT  
TGAAATGCAATGCATTTAGAATCCTTAGCAAAAACCTCAGTATGGTGTGGAACCTTGGACATTACAGGAC  
ACCAGTTATGAAATGTGGCTAACACCACCCAAACGGTGCTTTAAAAAACAGGGAAATACTGTGGAGGTAA  
AATTTGATGGCTGTGAAGCAATGTAAATGGAGTATGTGATGGACACATATATACCTGCAGGACAACGA  
CTCATGGGTAAAAGTAGAATAGTTCCGTAGATGCCAAGGCATATATTATACATGTGGACAATTTAAAAACA  
TATTATGTAAATTTTAAATAAAGAGGCACAAAAGTATGGTAGTACCAATCATTGGGAAGTATGTTATGGCA  
GCACAGTTATATGTTCTCCTGCATCTGTATCTAGCACTGTACGAGAAGTATCCATTGCTGAACCTACTAC  
ATACACCCCCGCACAGACCACCGCCCCCTACAGTGTCCGCCTGCACCACGGAAGACGGCGTGTGCGCGCCG  
CCTAGGAAGCGAGCACGTGGACCGTCCACTAACACACCCTGTGTGTGGCCAACATCAGATCCGTGGACA  
GTACAATCAACAACATCGTCACTGACAATTACAACAAGCACCAAGAAGGAACAACCTGTCACAGTGCAGC  
TACGCCTATAGTGCAACTGCAAGGTGATTCCAATTGTTTAAATGTTTTAGATATAGACTGAATGACAAA  
TATAAACATTTGTTTGAATTAGCATCTTCAACGTGGCATTGGGCCTCACCTGAGGCACCACATAAAAAATG  
CAATTGTAACATTAACATATAGCAGTGAGGAACAACGTCAGCAATTTTAAACAGTGTA AAAAATACCACC  
CACCATTAGGCATAAGGTGGGGTTTATGTCATTACATTTATTGTAACCATTACACCTGTATATATGTATA  
TGTGTACATAACATACGTGTATGGAGGTAGTGCCTGTACAAATTGCTGCAGCAACAACCTACAACATTGAT  
ATTGCCTGTTGTTATTGCATTTGCAGTATGTATTCTTAGTATTGTACTTATAATATTAATATCTGATTTT  
GTAGTATATACATCTGTGCTGGTACTAACACTTCTTTTATATTTGCTTTTGTGGCTTTTATTAAACAACCC  
CTTTGCAATTCTTTTTTACTAACACTGTGTGTGTGCTATTTTCTGCTTTTATATACACATATACATTGT  
GCAACGCAACAATAATGGTGATGTAACTGTCACTTAAATGATGGTGATACATGGTTGTTTCTGTGGT  
TGTTTACTGCATTTGTTGTAGCTGTACTTGGATTGTTGTTACTACATTACAGGGCTGTACATGGTACTGA  
AAAACTAAATGTGCTAAGTGTAATCAAACCGCAATACTACTGTGGATTATGTGTATATGTCACATGGT  
GATAATGGAGATTATGTGTACATGAACTAGAGTAAACCTTTTTTATACAGTGTGTGGTGTACGTTAGTTA  
TATATAATGAAACCTAGGGCACGCAGACGTAAACGTGCGTCAGCCACACAACCTATATCAAACATGCAAGG  
CCACTGGTACATGTCCCCAGATGTAATTCCTAAAGTTGAACATACTACTATTGCAGATCAAATATTTAAA  
ATGGGGAAGCTTAGGGGTTTTTTTTTGGTGGGTTAGGTATTGGTACAGGGGCTGGTAGTGGCGGTGCTGCA  
GGGTATATACCCCTGGGAAGCTCTCCCAAGCCTGCTATTACTGGGGGGCCAGCAGCACGTCCGCCAGTGC  
TTGTGGAGCCTGTTGCCCTTCCGATCCCTCCATTGTGTCTTAATTGAGGAGTCTGCTATTATTAATGC  
TGGTGCACCTGAGGTGGTACCCCTACACAGGGTGGCTTTACTATAACATCATCTGAATCGACTACACCT  
GCTATTTTAGATGTGTCTGTTACCAATCACACTACCCTAGTGTGTTTCAAAATCCCCTGTTTACAGAAC  
CGTCTGTAATACAGCCCCAACACCTGTGGAGGCCAGTGGTCACATACTTATATCTGCCCCAACATAAC  
ATCCCAACATGTAGAAGACATTCCACTAGACACTTTTGTGTATCCTCTAGTGATAGTGGACCTACATCC  
AGTACTCCTCTTCCCTCGTGCTTTTCTCGGCCCTCGGGTGGGTTTGTATAGTCGTGCCCTTACAGCAGGTAC  
AGGTTACGGACCCCGGCTTTTGTCCACGCCACAGCGATTGGTAACCTTATGACAACCCTGTCTATGAAGG  
AGAAGATGTAAGTTTACAATTTACCCATGAGTCTATCCACAATGCACCTGATGAAGCATTTATGGATATT  
ATTAGACTACATAGACCAGCTATAACGTCACAGCGGGTCTTGTGCGTTTATAGTCGCATTGGGCAACGGG  
GGTCCATGTACACACGCAGTGGACAACATATAGGTGCCCGCATACATTATTTTCAGGACATTTACACAGT  
TACACAAGCTGCAGAGGAAATAGAAGTGCACCCTCTAGTGGCTGCAGAAAAATGACACGTTTGATATTTAT  
GCTGAACCATTTGACCCTATCCCTGACCCTGTCCAACATTCTGTTACACAGTCTTATCTTACCTCCACAC  
CTAATACCCCTTTCACAATCGTGGGGTAATACCACAGTCCCATTTGTCAATCCCTAGTGACTGGTTTGTGCA  
GTCTGGGCTGACATAACTTTTCTACTGCATCTATGGGAACACCCTTTAGTCCTGTAACCTCCTGCTTTA

CCTACAGGCCCTGTTTTTATTACAGGTTCTGACTTCTATTTGCATCCTACATGGTACTTTGCACGCAGAC  
GCCGTAAACGTATTCCTTATTTTTTACAGATGTGGCGGCCTAGCGACAGCACAGTATATGTGCCTCCTC  
CCAACCTGTATCCAAGGTTGTTGCCACGGATGCGTATGTTAAACGCACCAACATATTTTATCATGCCAG  
CAGTTCTAGACTCCTTGCTGTGGGACATCCATATTACTCTATCAAAAAAGTTAACAAAACAGTTGTACCA  
AAGGTGTCTGGATATCAATATAGAGTGTTTAAGGTAGTGTTGCCAGATCCTAACAAGTTTGCATTACCTG  
ATTCATCCCTGTTTGACCCCACTACACAGCGTTTAGTATGGGCGTGCACAGGGTTGGAGGTAGGCAGGGG  
TCAACCTTTAGGCGTTGGTGTTAGTGGGCATCCATTGCTAAACAAATATGATGATGTAGAAAATAGTGGT  
GGGTATGGTGGTAATCCTGGTCAGGATAATAGGGTTAATGTAGGTATGGATTATAAACAAACCCAGCTAT  
GTATGGTGGGCTGTGCTCCACCGTTAGGTGAACATTGGGGTAAGGGTACACAATGTTCAAATACCTCTGT  
ACAAAATGGTGACTGCCCCCCGTTGGAAC TTATTACCAGTGTTATACAGGATGGGGACATGGTTGATACA  
GGCTTTGGTGCTATGAATTTTGCAAGTTTACAAACCAATAAATCGGATGTTCCCTTGATATTTGTGGAA  
CTGTCTGCAAAATCCTGATTATTTGCAAAATGGCTGCAGACCCTTATGGTGATAGGTTGTTTTTTTATTT  
GCGAAAGGAACAAATGTTTGCTAGACACTTTTTTAATAGGGCCGGTACTGTGGGGGAACCTGTGCCTGAT  
GACCTGTTGGTAAAAGGGGTAATAACAGATCATCTGTAGCTAGTAGTATTTATGTACATACACCTAGTG  
GCTCATTGGTGCTTCAGAGGCTCAATTATTTAATAAACCATATTGGCTTCAAAGGCTCAGGGACATAA  
CAATGGTATTTGCTGGGGAAACCACTTGTGTGTTACTGTGGTAGATACCACACGCAGTACAAATATGACA  
CTATGTGCATCTGTGTCTAAATCTGCTACATACTAATTACAGATTATAAGGAATACATGCGCCATGTGG  
AGGAGTTTGATTTACAGTTTATTTTTCAATTGTGTAGCATTACATTATCTGCAGAAGTCATGGCCTATAT  
ACACACAATGAATCCTTCTGTTTTGGAGGACTGGAAC TTTGGTTTATCGCCTCCACCAAATGGTACACTG  
GAGGATACTTATAGATATGTACAGTCACAGGCCATTACCTGTCAGAAACCCACACCTGAAAAAGAAAAAC  
AGGATCCCTATAAGGATATGAGTTTTTGGGAGGTTAACTTAAAAGAAAAGTTTTCAAGTGAATTAGATCA  
GTTTCCCTTGGACGTAAGTTTTTATTGCAAAGTGATATCGAGGACGGACGTCTGCTCGTACAGGTATA  
AAGCGCCAGCTGTGTCTAAGCCCTCTACAGCCCCAAACGAAAACGTACCAAACCAAAAAGTAATATA  
TGTGTGTCAGTGTTGTGTTATTTATATGTTGTTGTAGTGTTATATGTTTCTTGATTGTGTATATGT  
GTATATGTTTGTGTATATGTGTATGTTATGTATGTTATGTTGTTATGTATGTTTGTGTGTTTAGTGTGTG  
TATATATTTGTGGAATGTGTATGTATGTTTTTGTGCAATAAACAATTATTATGTGTGTCCTGTTACACCC  
AGTGACTAAGTTGTGTTTTGCACGCGCCGTTTGTGTTGCCTTCATATTATATTATATATATTTGTAATAT  
ACCTATACTATGTTACCCCCCCCCACTTGCAACCGTTTTCGGTTGCCCTTACATACACTTACCTCAAATT  
TGTTATAACGTGTTTTGTACTAATCCCATATGTTGTGTGCCAAGGTACATATTGCCCTGCCAAGTATCTT  
GCCAACAACACACCTGGCCAGGGCGCGGTATTGCATGACTAATGTACAATAAACCTGTCGGTTTTGTACAA  
TGTTGTGGATTGCAGCCAAAGGTTAAAAGCATTTTTGGCTTCTAGCTGAACATTTTTGTACCCTTAGTAT  
ATTATGCACAATACCCACAAAATGAGTAACCTAAGGTCACACACCTGCAACCGGTTTCGGTTACCCACAC  
CCTACATATTCCTTCTTATA

>HPV8\_Beta\_333074\_nt557\_E6\_AOS|1  
TCATAGAGAAATTAGATTGCTGTGGGAGAGGCCGTCCCTTTTCATAAAGTTAGAGGAGGCT  
>HPV8\_Beta\_333074\_nt549\_E6\_AOS|1  
TTTGGATATCATAGAGAAATTAGATTGCTGTGGGAGAGGCCGTCCCTTTTCATAAAGTTAG  
>HPV8\_Beta\_333074\_nt536\_E6\_AOS|1  
ACTGCTTGTCATTTTTTGGATATCATAGAGAAATTAGATTGCTGTGGGAGAGGCCGTCCCT  
>HPV8\_Beta\_333074\_nt529\_E6\_AOS|1  
TGTCAAAACCTGCTTGTCATTTTTTGGATATCATAGAGAAATTAGATTGCTGTGGGAGAGGC  
>HPV8\_Beta\_333074\_nt355\_E6\_AOS|1  
TTTGACAAAAAGAGACTGTGCCTAATTTGGAAAAATTACGTTGTTACTGCGTGTTGTCGT  
>HPV8\_Beta\_333074\_nt348\_E6\_AOS|1  
GTGTGAGTTTGACAAAAAGAGACTGTGCCTAATTTGGAAAAATTACGTTGTTACTGCGTG  
>HPV51\_Alpha\_333087\_nt490\_E6\_AOS|1  
TGGACGGGGCAATGCGCTAATTGCTGGCAACGTACACGACAACGTAACGAAACCCAAGTG  
>HPV51\_Alpha\_333087\_nt149\_E6\_AOS|1  
CTTTGAACGTTTCTATGCACAATATACAGGTAGTGTGTGTGTATTGTAAAAAGGAATTAT  
>HPV20\_Beta\_1020162\_nt210\_E6\_AOS|1  
CTCCTTCTTCAGAAGACAGCGCTGATGAAGGACCATCTAATATTGGAGAGGCAAAACCTC  
>HPV20\_Beta\_1020162\_nt296\_E6\_AOS|1  
ACAATCTGTGGCCTAGCAAACTTTTAGAAAATACCGCTAGATGATTGTTTGATACCTTGT  
>HPV20\_Beta\_1020162\_nt289\_E6\_AOS|1  
GCCTGCAACAATCTGTGGCCTAGCAAACTTTTAGAAAATACCGCTAGATGATTGTTTGAT  
>HPV20\_Beta\_1020162\_nt203\_E6\_AOS|1  
GCTACACCTCCTTCTTCAGAAGACAGCGCTGATGAAGGACCATCTAATATTGGAGAGGCA  
>HPV21\_Beta\_1020170\_nt284\_E6\_AOS|1  
TTAGAGCCACCATTACCAGCTACAATTCGTGACCTAGCCAATCTGTTAGAGATAACCATTG  
>HPV21\_Beta\_1020170\_nt277\_E6\_AOS|1  
TAGCTTTTTAGAGCCACCATTACCAGCTACAATTCGTGACCTAGCCAATCTGTTAGAGAT  
>HPV22\_Beta\_1020178\_nt480\_E6\_AOS|1  
AGCAAGAAGAACAACGACCTGTAGGCCAAATTTATATGAGATGTCAATATTGCTTGAAGT  
>HPV22\_Beta\_1020178\_nt302\_E6\_AOS|1  
AGATTCTGCAGTAGGTTTTTAACCTATTTGGAATTGCGGCAATTTGATTATAAGAATTTG  
>HPV22\_Beta\_1020178\_nt286\_E6\_AOS|1  
TCTTTTGCTACCTTGTAGATTCTGCAGTAGGTTTTTAACCTATTTGGAATTGCGGCAATT  
>HPV22\_Beta\_1020178\_nt277\_E6\_AOS|1  
TGTAGTAGATCTTTTGCTACCTTGATAGATTCTGCAGTAGGTTTTTAACCTATTTGGAATT  
>HPV23\_Beta\_1020186\_nt463\_E6\_AOS|1  
AATTCAACAATTTTATCAGCTAACTGTGTATGGTCGTGAAATTGAGCAGGAGGAGCAACG  
>HPV23\_Beta\_1020186\_nt444\_E6\_AOS|1  
ATGCTTCTGCTCAATTTGAAATTCAACAATTTTATCAGCTAACTGTGTATGGTCGTGAAA  
>HPV23\_Beta\_1020186\_nt346\_E6\_AOS|1  
TCTTACCTATTTAGAGTTGCGAGAATTTGATTATAAACATTTGCAGTTAATCTGGACAGA  
>HPV23\_Beta\_1020186\_nt339\_E6\_AOS|1  
CTAGGTTTCTTACCTATTTAGAGTTGCGAGAATTTGATTATAAACATTTGCAGTTAATCT  
>HPV23\_Beta\_1020186\_nt332\_E6\_AOS|1  
TTTTGTTCTAGGTTTCTTACCTATTTAGAGTTGCGAGAATTTGATTATAAACATTTGCAG  
>HPV28\_Alpha\_1020202\_nt153\_E6\_AOS|1  
ATATCATTTGATGACCTCCGTTTGCACCTGCATATTCTGCGCCAAAGTGCTGACCACAGCG  
>HPV28\_Alpha\_1020202\_nt190\_E6\_AOS|1  
GCGCCAAAGTGCTGACCACAGCGGAGCTATCAGCATTTGCATTAAAGAGAACTAAATGTGG  
>HPV28\_Alpha\_1020202\_nt172\_E6\_AOS|1  
GTTTGCACCTGCATATTCTGCGCCAAAGTGCTGACCACAGCGGAGCTATCAGCATTTGCAT  
>HPV28\_Alpha\_1020202\_nt165\_E6\_AOS|1  
GACCTCCGTTTGCACCTGCATATTCTGCGCCAAAGTGCTGACCACAGCGGAGCTATCAGCA  
>HPV28\_Alpha\_1020202\_nt144\_E6\_AOS|1

GACAGTGGAAATATCATTTTGATGACCTCCGTTTGCACCTGCATATTCTGCGCCAAAGTGCTG  
>HPV29\_Alpha\_1020210\_nt158\_E6\_AOS|1  
AGTACCATTGAGGACCTTCGCCTACAGTGTTTCTGCACGAAAGAGCTAACCAGCCC  
>HPV29\_Alpha\_1020210\_nt280\_E6\_AOS|1  
GTGCATGTGCACGCTGCTTATTGTTTGAAGGCATAAAGCGGCGCCTAAAATACTGGCAGT  
>HPV29\_Alpha\_1020210\_nt261\_E6\_AOS|1  
AAAAGTGGAGCTCCGTACGGTGCATGTGCACGCTGCTTATTGTTTGAAGGCATAAAGCGG  
>HPV29\_Alpha\_1020210\_nt191\_E6\_AOS|1  
TTTCTGCACGAAAGAGCTAACCAGCCCAGAACTGGCAGCATTTTGCATTTCGGGAATTAAA  
>HPV29\_Alpha\_1020210\_nt184\_E6\_AOS|1  
AGTGTGTTTTCTGCACGAAAGAGCTAACCAGCCCAGAACTGGCAGCATTTTGCATTTCGGG  
>HPV36\_Beta\_1020218\_nt480\_E6\_AOS|1  
TATTAGGAAGAGATATTGAATTGGCTGCAGGTCGCTCCATATTTGAAATTGACATTAGGT  
>HPV36\_Beta\_1020218\_nt207\_E6\_AOS|1  
AGCAAGCCTCCGAACAGCAGAATATTACAGAAAAAGAAAAAGAACAGCTGCCTTTAACTA  
>HPV36\_Beta\_1020218\_nt200\_E6\_AOS|1  
ATGGCAGAGCAAGCCTCCGAACAGCAGAATATTACAGAAAAAGAAAAAGAACAGCTGCCT  
>HPV37\_Beta\_1020226\_nt308\_E6\_AOS|1  
ATAGAATTGATCGCATTTGATCGAAAAGGTCTTCAACTAATTTGGACCGAAGAAGATTTA  
>HPV37\_Beta\_1020226\_nt301\_E6\_AOS|2  
AGCATATATAGAATTGATCGCATTTGATCGAAAAGGTCTTCAACTAATTTGGACCGAAGA  
>HPV38\_Beta\_1020234\_nt441\_E6\_AOS|1  
TCTTTGGCCGTGAAATTGAACAGGTGGAGCAACAGACAATAGGCCTTATTGTTATAAGGT  
>HPV38\_Beta\_1020234\_nt434\_E6\_AOS|1  
TTAACTGTCTTTGGCCGTGAAATTGAACAGGTGGAGCAACAGACAATAGGCCTTATTGTT  
>HPV38\_Beta\_1020234\_nt423\_E6\_AOS|1  
AGTTTTATGAATTAAGTGTCTTTGGCCGTGAAATTGAACAGGTGGAGCAACAGACAATAG  
>HPV38\_Beta\_1020234\_nt228\_E6\_AOS|1  
AGCAGCTCAGTGATAAGTTAACAGTTCCTGTAGAGGATCTGTTATTACCCTGTAGATTCT  
>HPV44\_Alpha\_1020242\_nt363\_E6\_AOS|1  
GTAACAGTGGAAGAAGAAACAAATAAGTCAATTCTGGACGTGCTGATACGCTGCTATTTG  
>HPV44\_Alpha\_1020242\_nt378\_E6\_AOS|1  
GAAACAAATAAGTCAATTCTGGACGTGCTGATACGCTGCTATTTGTGCCACAAACCATTG  
>HPV44\_Alpha\_1020242\_nt371\_E6\_AOS|1  
GGAAGAAGAAACAAATAAGTCAATTCTGGACGTGCTGATACGCTGCTATTTGTGCCACAA  
>HPV44\_Alpha\_1020242\_nt356\_E6\_AOS|1  
ATATGCAGTAACAGTGGAAGAAGAAACAAATAAGTCAATTCTGGACGTGCTGATACGCTG  
>HPV44\_Alpha\_1020242\_nt338\_E6\_AOS|1  
GCATTTTAACTACGCGGATATGCAGTAACAGTGGAAGAAGAAACAAATAAGTCAATTCT  
>HPV55\_Alpha\_1020266\_nt376\_E6\_AOS|1  
AGACAAAGCAGTCAATTTTGGACGTGTTACATACGCTGTTATTTGTGCCACAAACCATTGT  
>HPV66\_Alpha\_1020290\_nt229\_E6\_AOS|1  
TAGAGCTATATAGGTTTGCATGTATTGAGTTAAACTAGTATATAGAAACAATTGGCCAT  
>HPV66\_Alpha\_1020290\_nt222\_E6\_AOS|1  
ACAAGTTTAGAGCTATATAGGTTTGCATGTATTGAGTTAAACTAGTATATAGAAACAAT  
>HPV66\_Alpha\_1020290\_nt215\_E6\_AOS|1  
GGAAGTTACAAGTTTAGAGCTATATAGGTTTGCATGTATTGAGTTAAACTAGTATATAG  
>HPV66\_Alpha\_1020290\_nt208\_E6\_AOS|1  
GCAAAAAGGAACCTTACAAGTTTAGAGCTATATAGGTTTGCATGTATTGAGTTAAACTAG  
>HPV70\_Alpha\_1173493\_nt330\_E6\_AOS|1  
TAAGGGAACCTACGGCATTATTCGAACTCGGTGTATGCAACAACCTTTGGAAAGCATAACTA  
>HPV70\_Alpha\_1173493\_nt342\_E6\_AOS|1  
GGCATTATTCGAACTCGGTGTATGCAACAACCTTTGGAAAGCATAACTAATACCAAGTTAT  
>HPV70\_Alpha\_1173493\_nt263\_E6\_AOS|1  
TTTATAGTATATAGAAACGGGAGCCATATGCTGCATGCCAAAAATGTATTAAATTTTCAT

>HPV70\_Alpha\_1173493\_nt174\_E6\_AOS|1  
CTACATTGCACGACATTACAATAGACTGTGTCTATTGTAAAACACAGCTACAGCAAACAG  
>HPV71\_Alpha\_12084981\_nt93\_E6\_AOS|1  
TATAAAGCAATGCTTGGTTCAGCAGATTTAGCTATGTCCAGCGGGGACGCATACCCACAC  
>HPV71\_Alpha\_12084981\_nt86\_E6\_AOS|1  
GTGCATATATAAAGCAATGCTTGGTTCAGCAGATTTAGCTATGTCCAGCGGGGACGCATA  
>HPV84\_Alpha\_12958167\_nt141\_E6\_AOS|2  
GGAATTACTAATTGTTTGGAGGTATAATTTCCCTCATGGGGTGTGCATGAAATGCTTATG  
>HPV84\_Alpha\_12958167\_nt151\_E6\_AOS|1  
ATTGTTTGGAGGTATAATTTCCCTCATGGGGTGTGCATGAAATGCTTATGCAGGGAAGCC  
>HPV84\_Alpha\_12958167\_nt134\_E6\_AOS|1  
CAGTAAAGGAATTACTAATTGTTTGGAGGTATAATTTCCCTCATGGGGTGTGCATGAAAT  
>HPV107\_Beta\_126131393\_nt531\_E6\_AOS|1  
AGGTAAGCAGATTGAGGAGATCACTCAGCAAAGTATTGGATTTATTAATATTAGATGTGT  
>HPV107\_Beta\_126131393\_nt421\_E6\_AOS|2  
AAAAATTTACAATTAATTTGGCATGAAAATTTAGTATATGGTTGTTGTTGCAGCTGTGCT  
>HPVcand87\_Alpha\_14475578\_nt253\_E6\_AOS|1  
TGCTGGTGTGGAGATTTGGATTTCCCTTATGGAGTGTGCCTACAATGCCTATTCAGAGAAG  
>HPVcand87\_Alpha\_14475578\_nt420\_E6\_AOS|1  
TGCAAACCATGTGCTGGCCCGAGAAGGACATATGATACACGCGAATCTGCACTTCCAC  
>HPVcand87\_Alpha\_14475578\_nt246\_E6\_AOS|1  
GAATTATTGCTGGTGTGGAGATTTGGATTTCCCTTATGGAGTGTGCCTACAATGCCTATTC  
>HPVcand87\_Alpha\_14475578\_nt239\_E6\_AOS|1  
ATTAAGGGAATTATTGCTGGTGTGGAGATTTGGATTTCCCTTATGGAGTGTGCCTACAATG  
>HPVcand87\_Alpha\_14475578\_nt124\_E6\_AOS|1  
CACCTACCAATATCTTTTTGCTATGTCAGGAATATGAGGTGGACTTTGACAACTTAAGGC  
>HPVcand87\_Alpha\_14475578\_nt92\_E6\_AOS|1  
CAACGGGACAGTCATGCCCAACGGACGCTACACACCTACCAATATCTTTTGCTATGTCA  
>HPV72\_Alpha\_1491683\_nt438\_E6\_AOS|1  
GAAAAGGAATATCAGGTGCAGACAGGAATCCACTTCCACAAGATAAGCGGACTGTGGACG  
>HPV72\_Alpha\_1491683\_nt431\_E6\_AOS|1  
CTGTCAGGAAAAGGAATATCAGGTGCAGACAGGAATCCACTTCCACAAGATAAGCGGACT  
>HPV72\_Alpha\_1491683\_nt424\_E6\_AOS|1  
CCCTAAGCTGTCAGGAAAAGGAATATCAGGTGCAGACAGGAATCCACTTCCACAAGATAA  
>HPV72\_Alpha\_1491683\_nt416\_E6\_AOS|1  
CTGCAAACCCCTAAGCTGTCAGGAAAAGGAATATCAGGTGCAGACAGGAATCCACTTCCA  
>HPV72\_Alpha\_1491683\_nt324\_E6\_AOS|1  
CTACGATACTGGACGTATTCGGGCTACGGACCCACTGTGGAACAGGAAACAGGCAAATCA  
>HPV72\_Alpha\_1491683\_nt137\_E6\_AOS|1  
GTTGCTGTGCAAGGAAATTGAGGTGGACCTAGAAGATTTACGGATTACCTGCATATTTTG  
>HPV73\_Alpha\_1491692\_nt143\_E6\_AOS|1  
AGCGTTATGTGACGAAGTGAATATTTCTATACATGATATAAACCTGGACTGTGTGTTTTG  
>HPV73\_Alpha\_1491692\_nt325\_E6\_AOS|1  
GAGAGTATAGGCGATATAGACAATCAGTATATGGCACTACGTTAGAAAAATTTAACTAACA  
>HPV73\_Alpha\_1491692\_nt316\_E6\_AOS|1  
CTAAAATTAGAGAGTATAGGCGATATAGACAATCAGTATATGGCACTACGTTAGAAAATT  
>HPV73\_Alpha\_1491692\_nt136\_E6\_AOS|1  
AGCTACAAGCGTTATGTGACGAAGTGAATATTTCTATACATGATATAAACCTGGACTGTG  
>HPV73\_Alpha\_1491692\_nt129\_E6\_AOS|1  
CCATACAAGCTACAAGCGTTATGTGACGAAGTGAATATTTCTATACATGATATAAACCTG  
>HPVcand86\_Alpha\_15741127\_nt149\_E6\_AOS|1  
TACTGGTCTGGAAACACGGATTTCCCTCATGGCGTGTGCCTAAAATGCATATGCAGAGAAG  
>HPVcand86\_Alpha\_15741127\_nt142\_E6\_AOS|1  
GAATTATTACTGGTCTGGAAACACGGATTTCCCTCATGGCGTGTGCCTAAAATGCATATGC  
>HPVcand86\_Alpha\_15741127\_nt135\_E6\_AOS|1

ACTAAAGGAATTATTACTGGTCTGGAAACACGGATTTCCCTCATGGCGTGTGCCTAAAATG  
>HPV88\_Gamma\_167600365\_nt342\_E6\_AOS|1  
AGGATTTCCCTAAGAAAGAATCTAGCTGATGTGGTATGCCGATGCTATGAATGTATGTCAT  
>HPV88\_Gamma\_167600365\_nt353\_E6\_AOS|1  
AGAAAGAATCTAGCTGATGTGGTATGCCGATGCTATGAATGTATGTCATTGCTTGATTTA  
>HPV88\_Gamma\_167600365\_nt287\_E6\_AOS|1  
GCTAGGTATGAGGCTGAACGCTTTTACCGCTGCTCTGTAAAGGGAATTCATTTTGAGGAT  
>HPV88\_Gamma\_167600365\_nt280\_E6\_AOS|1  
GCTTTCTGCTAGGTATGAGGCTGAACGCTTTTACCGCTGCTCTGTAAAGGGAATTCATTT  
>HPV88\_Gamma\_167600365\_nt273\_E6\_AOS|1  
GTTCTAGGCTTTCTGCTAGGTATGAGGCTGAACGCTTTTACCGCTGCTCTGTAAAGGGAA  
>HPV88\_Gamma\_167600365\_nt266\_E6\_AOS|1  
GTCCCTTGTTCTAGGCTTTCTGCTAGGTATGAGGCTGAACGCTTTTACCGCTGCTCTGTA  
>HPV88\_Gamma\_167600365\_nt259\_E6\_AOS|1  
GTGTTGTGTCCCTTGTTCTAGGCTTTCTGCTAGGTATGAGGCTGAACGCTTTTACCGCTG  
>HPV88\_Gamma\_167600365\_nt252\_E6\_AOS|1  
GTTTTGCGTGTTGTGTCCCTTGTTCTAGGCTTTCTGCTAGGTATGAGGCTGAACGCTTTT  
>HPV88\_Gamma\_167600365\_nt106\_E6\_AOS|1  
ACGGCTAGATGACTTCTGTTTCGATTTTAATATTTCTCTTTTGATGTGCATCTTCCTTG  
>HPV88\_Gamma\_167600365\_nt93\_E6\_AOS|1  
CTTATCTACCAAACCGCTAGATGACTTCTGTTTCGATTTTAAATATTTCTCTTTTGATG  
>HPV110\_Beta\_186461194\_nt239\_E6\_AOS|1  
TATTAATACCGTGTAGATTTTGTACTAGGTTTTATCATATATAGAATTATTAGGTTTTG  
>HPV110\_Beta\_186461194\_nt225\_E6\_AOS|1  
TCCTGTTTTAGACATATTAATACCGTGTAGATTTTGTACTAGGTTTTATCATATATAGA  
>HPV110\_Beta\_186461194\_nt218\_E6\_AOS|1  
TATGCATTCCGTGTTTTAGACATATTAATACCGTGTAGATTTTGTACTAGGTTTTATCAT  
>HPV110\_Beta\_186461194\_nt208\_E6\_AOS|1  
GCAGATACATTATGCATTCCTGTTTTAGACATATTAATACCGTGTAGATTTTGTACTAGG  
>HPV111\_Beta\_186461202\_nt463\_E6\_AOS|1  
ATTGTTTGAAAAAATTGGATCTGGTAGAGAAGCTAGGAGTGTGCTACAAACAACAATATT  
>HPV111\_Beta\_186461202\_nt470\_E6\_AOS|1  
GAAAAAATTGGATCTGGTAGAGAAGCTAGGAGTGTGCTACAAACAACAATATTTTCATAG  
>HPV111\_Beta\_186461202\_nt379\_E6\_AOS|1  
AATATTTTGAATACTCTGTTGTAGGAAAACAGATAGAACTGTAGCAAACCAGCCTATTG  
>HPVFA75/KI88-03\_Unclassified\_206902429\_nt411\_E6\_AOS|1  
GAGCAGGTGACTCAACAGTCTGTAGGCTTTATTACTATCAGATGCATTTATTGTTTAAAG  
>HPVFA75/KI88-03\_Unclassified\_206902429\_nt426\_E6\_AOS|1  
CAGTCTGTAGGCTTTATTACTATCAGATGCATTTATTGTTTAAAGCATCTAGACCTTTTA  
>HPVFA75/KI88-03\_Unclassified\_206902429\_nt419\_E6\_AOS|1  
GACTCAACAGTCTGTAGGCTTTATTACTATCAGATGCATTTATTGTTTAAAGCATCTAGA  
>HPV91\_Alpha\_22023568\_nt81\_E6\_AOS|1  
CAATTATTATGCTTGTACTAAAGGGAGTAACCGAAAACGGTCCGACCGAAAGCGGTACAT  
>HPV91\_Alpha\_22023568\_nt94\_E6\_AOS|1  
TGTACTAAAGGGAGTAACCGAAAACGGTCCGACCGAAAGCGGTACATATATAAACCACCC  
>HPV91\_Alpha\_22023568\_nt74\_E6\_AOS|1  
TTAGTAACAATTATTATGCTTGTACTAAAGGGAGTAACCGAAAACGGTCCGACCGAAAGC  
>HPV91\_Alpha\_22023568\_nt52\_E6\_AOS|1  
CACCTTACATTCTTTGTGGTTATTAGTAACAATTATTATGCTTGTACTAAAGGGAGTAAC  
>HPV91\_Alpha\_22023568\_nt45\_E6\_AOS|1  
CGCTGCACACCTTACATTCTTTGTGGTTATTAGTAACAATTATTATGCTTGTACTAAAGG  
>HPV91\_Alpha\_22023568\_nt38\_E6\_AOS|1  
AACCGGTCGCTGCACACCTTACATTCTTTGTGGTTATTAGTAACAATTATTATGCTTGTGTA  
>HPV91\_Alpha\_22023568\_nt31\_E6\_AOS|1  
AGACCGAAACCGGTCGCTGCACACCTTACATTCTTTGTGGTTATTAGTAACAATTATTAT

>HPV91\_Alpha\_22023568\_nt24\_E6\_AOS|1  
CACCTGCAGACCGAAACCGGTCGCTGCACACCTTACATTCTTTGTGGTTATTAGTAACAA  
>HPV91\_Alpha\_22023568\_nt17\_E6\_AOS|1  
TTAGGCACACCTGCAGACCGAAACCGGTCGCTGCACACCTTACATTCTTTGTGGTTATTA  
>HPV91\_Alpha\_22023568\_nt10\_E6\_AOS|1  
TACTGTGTTAGGCACACCTGCAGACCGAAACCGGTCGCTGCACACCTTACATTCTTTGTG  
>HPVcand89\_Alpha\_22095322\_nt66\_E6\_AOS|1  
GGATCTACGGCTTACATGCATATATTGCACCAAGGAGCTTACAACATCAGAAGTGCTGTC  
>HPVcand89\_Alpha\_22095322\_nt59\_E6\_AOS|1  
ATTTAGAGGATCTACGGCTTACATGCATATATTGCACCAAGGAGCTTACAACATCAGAAG  
>HPVcand89\_Alpha\_22095322\_nt52\_E6\_AOS|1  
GACGTGGATTTAGAGGATCTACGGCTTACATGCATATATTGCACCAAGGAGCTTACAACA  
>HPV90\_Alpha\_22138122\_nt242\_E6\_AOS|1  
CTAGCTATGCACCCACAGTGAATATGAAACAGGAGTGCCTATTTTAGAATTGCTTATTA  
>HPV90\_Alpha\_22138122\_nt267\_E6\_AOS|1  
TGAAACAGGAGTGCCTATTTTAGAATTGCTTATTAGATGCTACCTGTGCCATAAACCACT  
>HPV90\_Alpha\_22138122\_nt235\_E6\_AOS|1  
CAGTATTCTAGCTATGCACCCACAGTGAATATGAAACAGGAGTGCCTATTTTAGAATTG  
>HPV90\_Alpha\_22138122\_nt183\_E6\_AOS|1  
ATGTCCTGCGTGTCTGGAAGCAGCCGGGAAACTAAGGCAATTTAGATACTGGCAGTATTC  
>HPV90\_Alpha\_22138122\_nt167\_E6\_AOS|1  
ATTTTCCATTTGCAGCATGTCTGCGTGTCTGGAAGCAGCCGGGAAACTAAGGCAATTTA  
>HPV90\_Alpha\_22138122\_nt160\_E6\_AOS|1  
AGAAAGCATTTTCCATTTGCAGCATGTCTGCGTGTCTGGAAGCAGCCGGGAAACTAAGG  
>HPV58\_Alpha\_222386\_nt279\_E6\_AOS|1  
GAAATCCATTTGCAGTATGTAAAGTGTGCTTACGATTGCTATCTAAAATAAGTGAGTATA  
>HPV58\_Alpha\_222386\_nt272\_E6\_AOS|1  
AGAGATGGAAATCCATTTGCAGTATGTAAAGTGTGCTTACGATTGCTATCTAAAATAAGT  
>HPV58\_Alpha\_222386\_nt265\_E6\_AOS|1  
AGTGTATAGAGATGGAAATCCATTTGCAGTATGTAAAGTGTGCTTACGATTGCTATCTAA  
>HPV58\_Alpha\_222386\_nt175\_E6\_AOS|1  
TGTGCATGAAATCGAATTGAAATGCGTTGAATGCAAAAAGACTTTGCAGCGATCTGAGGT  
>HPV58\_Alpha\_222386\_nt168\_E6\_AOS|1  
AGACATCTGTGCATGAAATCGAATTGAAATGCGTTGAATGCAAAAAGACTTTGCAGCGAT  
>HPV58\_Alpha\_222386\_nt161\_E6\_AOS|1  
GCGTTGGAGACATCTGTGCATGAAATCGAATTGAAATGCGTTGAATGCAAAAAGACTTTG  
>HPV58\_Alpha\_222386\_nt154\_E6\_AOS|1  
GTGTCAGGCGTTGGAGACATCTGTGCATGAAATCGAATTGAAATGCGTTGAATGCAAAAA  
>HPV58\_Alpha\_222386\_nt147\_E6\_AOS|1  
ATGATTTGTGTCAGGCGTTGGAGACATCTGTGCATGAAATCGAATTGAAATGCGTTGAAT  
>HPV74\_Alpha\_27462483\_nt350\_E6\_AOS|2  
TACGGCACATTTTGGAAAAGGCAAGATTTATTAACTAGGCGACACCTGGAAAGGGCGCT  
>HPV92\_Beta\_27531786\_nt349\_E6\_AOS|1  
GATGCTATAGAAAGGGACTCAGGTAGTCTTTTGTGTTGTTTAACTGTTAGATGTAAGTTT  
>HPV92\_Beta\_27531786\_nt342\_E6\_AOS|1  
AGGAAAGGATGCTATAGAAAGGGACTCAGGTAGTCTTTTGTGTTGTTTAACTGTTAGATG  
>HPV92\_Beta\_27531786\_nt112\_E6\_AOS|1  
AAACCTCCTTCGGTGCAGGAAGTTAGAAGACAGTTAGATATTCCATTGGAGGACATTTTA  
>HPV75\_Beta\_2911544\_nt470\_E6\_AOS|1  
ATACATAATCTTATTGTAAGGTGCCAGTTTGTCTGAAACGTTTGGATATATTTGAAAAA  
>HPV75\_Beta\_2911544\_nt463\_E6\_AOS|1  
AGAAAGTATACATAATCTTATTGTAAGGTGCCAGTTTGTCTGAAACGTTTGGATATATT  
>HPV75\_Beta\_2911544\_nt456\_E6\_AOS|1  
GAGCAGCAGAAAGTATACATAATCTTATTGTAAGGTGCCAGTTTGTCTGAAACGTTTGG  
>HPV75\_Beta\_2911544\_nt449\_E6\_AOS|1

GAAGGCAGAGCAGCAGAAAGTATACATAATCTTATTGTAAGGTGCCAGTTTTGTCTGAAA  
>HPV75\_Beta\_2911544\_nt441\_E6\_AOS|1  
TAGAAATAGAAGGCAGAGCAGCAGAAAGTATACATAATCTTATTGTAAGGTGCCAGTTTT  
>HPV76\_Beta\_2911551\_nt474\_E6\_AOS|1  
CGAACATTATAATAAGGTGTCAATTTTGTGTGAAACGCCTGGATTTATTTGAAAACTTG  
>HPV76\_Beta\_2911551\_nt467\_E6\_AOS|1  
AATATAGCGAACATTATAATAAGGTGTCAATTTTGTGTGAAACGCCTGGATTTATTTGAA  
>HPV76\_Beta\_2911551\_nt460\_E6\_AOS|1  
TGCAGAAAAATATAGCGAACATTATAATAAGGTGTCAATTTTGTGTGAAACGCCTGGATTT  
>HPV76\_Beta\_2911551\_nt453\_E6\_AOS|1  
GCAGAGCTGCAGAAAAATATAGCGAACATTATAATAAGGTGTCAATTTTGTGTGAAACGCC  
>HPV76\_Beta\_2911551\_nt446\_E6\_AOS|1  
ATAGAAGGCAGAGCTGCAGAAAAATATAGCGAACATTATAATAAGGTGTCAATTTTGTGTG  
>HPV77\_Alpha\_2911558\_nt161\_E6\_AOS|1  
ACCGTTTCGACGACCTTCGCCTACTGTGTGTGTTCTGCACAAAAGAATTA ACTACTGCTGA  
>HPV77\_Alpha\_2911558\_nt300\_E6\_AOS|1  
CTGCTATATGGCATTGAGCGGCGCCTGAAACACTGGGAGTATTCATACTACGTGGACGGC  
>HPV77\_Alpha\_2911558\_nt293\_E6\_AOS|1  
GTGTTTACTGCTATATGGCATTGAGCGGCGCCTGAAACACTGGGAGTATTCATACTACGT  
>HPV77\_Alpha\_2911558\_nt198\_E6\_AOS|1  
ACAAAAGAATTA ACTACTGCTGAACTGGCAGCATTTACAATTAGAGAATTAAATGTGGTG  
>HPV77\_Alpha\_2911558\_nt191\_E6\_AOS|1  
GTTCTGCACAAAAGAATTA ACTACTGCTGAACTGGCAGCATTTACAATTAGAGAATTAAA  
>HPV77\_Alpha\_2911558\_nt184\_E6\_AOS|1  
TGTGTGTGTTCTGCACAAAAGAATTA ACTACTGCTGAACTGGCAGCATTTACAATTAGAG  
>HPV77\_Alpha\_2911558\_nt154\_E6\_AOS|1  
GTGGAATACCGTTTCGACGACCTTCGCCTACTGTGTGTGTTCTGCACAAAAGAATTA ACTA  
>HPV80\_Beta\_2911565\_nt422\_E6\_AOS|1  
ACATTTTATGAACAGTCAGTGTGTGGTTGGGAGATTGAGGTAGTTGAGCGAAAAGCTGTT  
>HPV80\_Beta\_2911565\_nt318\_E6\_AOS|1  
TAAGTTTTTGATCGCAAATGTTTGCAGTTGATTTGGACTGAAGAAGACTTTGTCTTTGCTT  
>HPV80\_Beta\_2911565\_nt311\_E6\_AOS|1  
GAGTTAGTAAGTTTTTGATCGCAAATGTTTGCAGTTGATTTGGACTGAAGAAGACTTTGTC  
>HPV80\_Beta\_2911565\_nt303\_E6\_AOS|1  
CTTATATAGAGTTAGTAAGTTTTTGATCGCAAATGTTTGCAGTTGATTTGGACTGAAGAAG  
>HPV80\_Beta\_2911565\_nt291\_E6\_AOS|1  
AAAGATTTTTTA ACTTATATAGAGTTAGTAAGTTTTTGATCGCAAATGTTTGCAGTTGATTT  
>HPV80\_Beta\_2911565\_nt282\_E6\_AOS|1  
GGTTTTGTCAAAGATTTTTTA ACTTATATAGAGTTAGTAAGTTTTTGATCGCAAATGTTTGC  
>HPVRTRX7\_Unclassified\_30315616\_nt530\_E6\_AOS|1  
ATTGAAAATCAGGTGTCAGACTTGCTTATCATTTTTTGAGCACCATTGAAAAATTAGATAG  
>HPVRTRX7\_Unclassified\_30315616\_nt435\_E6\_AOS|1  
TGTGTAGCTACTGCAACTTTCGAATTC AATGAATATTACCAGCAAACAGTTTTAGGTAGA  
>HPVRTRX7\_Unclassified\_30315616\_nt428\_E6\_AOS|1  
AAGTTGTTGTGTAGCTACTGCAACTTTCGAATTC AATGAATATTACCAGCAAACAGTTTT  
>HPV65\_Gamma\_312100\_nt417\_E6\_AOS|1  
CTACTAGACATTGTTGAGAAATTAGACTTGCTGTACTCTGACCAGGCCTGCTACTTAATA  
>HPV65\_Gamma\_312100\_nt410\_E6\_AOS|1  
TTTGAGACTACTAGACATTGTTGAGAAATTAGACTTGCTGTACTCTGACCAGGCCTGCTA  
>HPV65\_Gamma\_312100\_nt403\_E6\_AOS|1  
TATGTTGTTT GAGACTACTAGACATTGTTGAGAAATTAGACTTGCTGTACTCTGACCAGG  
>HPV65\_Gamma\_312100\_nt396\_E6\_AOS|1  
AGATGTATATGTTGTTT GAGACTACTAGACATTGTTGAGAAATTAGACTTGCTGTACTCT  
>HPV65\_Gamma\_312100\_nt389\_E6\_AOS|1  
TTGCATCAGATGTATATGTTGTTT GAGACTACTAGACATTGTTGAGAAATTAGACTTGCT



>HPV65\_Gamma\_312100\_nt382\_E6\_AOS|1  
AGGAGATTTGCATCAGATGTATATGTTGTTGAGACTACTAGACATTGTTGAGAAATTAG  
>HPV65\_Gamma\_312100\_nt375\_E6\_AOS|1  
AAAATTAAGGAGATTTGCATCAGATGTATATGTTGTTTGGAGACTACTAGACATTGTTGAG  
>HPV65\_Gamma\_312100\_nt368\_E6\_AOS|1  
TCAAAGGAAAAATTAAGGAGATTTGCATCAGATGTATATGTTGTTTGGAGACTACTAGACAT  
>HPV11\_Alpha\_333026\_nt452\_E6\_AOS|1  
AAAGCACATATTGGGAAAGGCACGCTTCATAAAACTAAATAACCAGTGGAAGGGTCGTTG  
>HPV11\_Alpha\_333026\_nt445\_E6\_AOS|1  
AAAAACTAAAGCACATATTGGGAAAGGCACGCTTCATAAAACTAAATAACCAGTGGAAGG  
>HPV11\_Alpha\_333026\_nt438\_E6\_AOS|1  
GAAATAGAAAACTAAAGCACATATTGGGAAAGGCACGCTTCATAAAACTAAATAACCAG  
>HPV11\_Alpha\_333026\_nt431\_E6\_AOS|1  
GTTGTGTGAAATAGAAAACTAAAGCACATATTGGGAAAGGCACGCTTCATAAAACTAAA  
>HPV11\_Alpha\_333026\_nt373\_E6\_AOS|1  
AAGAAACCAATGAAGATATTTTAAAGTGTTAATTCGTTGTTACCTGTGTCACAAGCCGT  
>HPV11\_Alpha\_333026\_nt295\_E6\_AOS|1  
CCTGTTGCTTAGAACTGCAAGGGAAAATTAACCAATATAGACACTTTAATTATGCTGCAT  
>HPV31\_Alpha\_333048\_nt146\_E6\_AOS|1  
TGAACCTAAGCTCGGCATTGGAAATACCCCTACGATGAACCTAAGATTGAATTGTGTCTACTG  
>HPV31\_Alpha\_333048\_nt267\_E6\_AOS|1  
TATAGGGACGACACACCACACGAGTGTTGTACAAAATGTTTAAGATTTTATTCAAAAAGTA  
>HPV31\_Alpha\_333048\_nt139\_E6\_AOS|1  
AATTGCATGAACTAAGCTCGGCATTGGAAATACCCCTACGATGAACCTAAGATTGAATTGTG  
>HPV31\_Alpha\_333048\_nt132\_E6\_AOS|1  
CCTCGGAAATTCATGAACTAAGCTCGGCATTGGAAATACCCCTACGATGAACCTAAGATTG  
>HPV31\_Alpha\_333048\_nt125\_E6\_AOS|1  
AGAAAGACCTCGGAAATTCATGAACTAAGCTCGGCATTGGAAATACCCCTACGATGAACCT  
>HPV31\_Alpha\_333048\_nt118\_E6\_AOS|1  
ATCCTGCAGAAAGACCTCGGAAATTCATGAACTAAGCTCGGCATTGGAAATACCCCTACG  
>HPV31\_Alpha\_333048\_nt111\_E6\_AOS|1  
TTCAAAAATCCTGCAGAAAGACCTCGGAAATTCATGAACTAAGCTCGGCATTGGAAATA  
>HPV33\_Alpha\_333049\_nt300\_E6\_AOS|1  
ACTGTGTTTGCAGTTCTTATCTAAAATTAGTGAATATAGACATTATAATTATTCTGTATA  
>HPV33\_Alpha\_333049\_nt279\_E6\_AOS|1  
AAATCCATTTGGAATATGTAACTGTGTTTGCAGTTCTTATCTAAAATTAGTGAATATAG  
>HPV33\_Alpha\_333049\_nt272\_E6\_AOS|1  
GAGAGGGAAATCCATTTGGAATATGTAACTGTGTTTGCAGTTCTTATCTAAAATTAGTG  
>HPV33\_Alpha\_333049\_nt265\_E6\_AOS|1  
GTATATAGAGAGGGAAATCCATTTGGAATATGTAACTGTGTTTGCAGTTCTTATCTAAA  
>HPV33\_Alpha\_333049\_nt258\_E6\_AOS|1  
AACAGTTGTATATAGAGAGGGAAATCCATTTGGAATATGTAACTGTGTTTGCAGTTCTT  
>HPV33\_Alpha\_333049\_nt251\_E6\_AOS|1  
CAGATTTAACAGTTGTATATAGAGAGGGAAATCCATTTGGAATATGTAACTGTGTTTGC  
>HPV33\_Alpha\_333049\_nt174\_E6\_AOS|1  
TATACACAACATTGAACTACAGTGCGTGGAATGCAAAAACCTTTGCAACGATCTGAGGT  
>HPV33\_Alpha\_333049\_nt167\_E6\_AOS|1  
AGACAACCTATACACAACATTGAACTACAGTGCGTGGAATGCAAAAACCTTTGCAACGAT  
>HPV33\_Alpha\_333049\_nt160\_E6\_AOS|1  
GCATTGGAGACAACCTATACACAACATTGAACTACAGTGCGTGGAATGCAAAAACCTTTG  
>HPV35\_Alpha\_333050\_nt466\_E6\_AOS|1  
AGAAGAAAAAAACGATTCCATAACATCGGTGGACGGTGGACAGGTCGGTGTATGTCCTG  
>HPV35\_Alpha\_333050\_nt445\_E6\_AOS|1  
AGTTGAAAAAGCAAAGACATTTAGAAGAAAAAAACGATTCCATAACATCGGTGGACGGTG  
>HPV35\_Alpha\_333050\_nt259\_E6\_AOS|1

GTGTATAGTATATAGAGAAGGCCAGCCATATGGAGTATGCATGAAATGTTAAAATTTTA  
>HPV35\_Alpha\_333050\_nt248\_E6\_AOS|1  
TGCTATGATTTGTGTATAGTATATAGAGAAGGCCAGCCATATGGAGTATGCATGAAATGT  
>HPV35\_Alpha\_333050\_nt240\_E6\_AOS|1  
ACTTTGCATGCTATGATTTGTGTATAGTATATAGAGAAGGCCAGCCATATGGAGTATGCA  
>HPV47\_Beta\_333062\_nt243\_E6\_AOS|1  
AGAGGAAAAGCTAGAACTACCTACTACTATTAGAGGCTTAGCTCAATTGTTAGACATACC  
>HPV47\_Beta\_333062\_nt251\_E6\_AOS|1  
AGCTAGAACTACCTACTACTATTAGAGGCTTAGCTCAATTGTTAGACATACCTTTAGTAG  
>HPV47\_Beta\_333062\_nt236\_E6\_AOS|1  
CAGTTAAAGAGGAAAAGCTAGAACTACCTACTACTATTAGAGGCTTAGCTCAATTGTTAG  
>HPV47\_Beta\_333062\_nt229\_E6\_AOS|1  
CAGACTACAGTTAAAGAGGAAAAGCTAGAACTACCTACTACTATTAGAGGCTTAGCTCAA  
>HPV47\_Beta\_333062\_nt222\_E6\_AOS|1  
TTTGGAAACAGACTACAGTTAAAGAGGAAAAGCTAGAACTACCTACTACTATTAGAGGCTT  
>HPV42\_Alpha\_333211\_nt456\_E6\_AOS|1  
GAAAAAAACCATCATATTGATACAGGTACAAGATTTCAATTTATATTGTGTCAGTGGACG  
>HPV42\_Alpha\_333211\_nt449\_E6\_AOS|1  
ACAGAGCGAAAAAAACCATCATATTGATACAGGTACAAGATTTCAATTTATATTGTGTCA  
>HPV42\_Alpha\_333211\_nt442\_E6\_AOS|1  
CGTTATCACAGAGCGAAAAAAACCATCATATTGATACAGGTACAAGATTTCAATTTATAT  
>HPV39\_Alpha\_333245\_nt174\_E6\_AOS|1  
CCACCTTGCAGGACATTACAATAGCCTGTGTCTATTGCAGACGACCACTACAGCAAACCG  
>HPV39\_Alpha\_333245\_nt162\_E6\_AOS|1  
CAACGCTGGACACCACCTTGCAGGACATTACAATAGCCTGTGTCTATTGCAGACGACCAC  
>HPV93\_Beta\_37089393\_nt376\_E6\_AOS|1  
GCTGGGCAATAGAAGTTAAGGAAAAAAAGCCACTCTCTGAAATTATAGTGAGGTGTCGCC  
>HPV93\_Beta\_37089393\_nt369\_E6\_AOS|1  
GTTGTTGGCTGGGCAATAGAAGTTAAGGAAAAAAAGCCACTCTCTGAAATTATAGTGAGG  
>HPV93\_Beta\_37089393\_nt362\_E6\_AOS|1  
TGATAGTGTTGTTGGCTGGGCAATAGAAGTTAAGGAAAAAAAGCCACTCTCTGAAATTAT  
>HPV93\_Beta\_37089393\_nt355\_E6\_AOS|1  
ACTTGAATGATAGTGTTGTTGGCTGGGCAATAGAAGTTAAGGAAAAAAAGCCACTCTCTG  
>HPV93\_Beta\_37089393\_nt348\_E6\_AOS|1  
GATAATTACTTGAATGATAGTGTTGTTGGCTGGGCAATAGAAGTTAAGGAAAAAAAGCCA  
>HPV12\_Beta\_396910\_nt614\_E6\_AOS|1  
GACAGGTGGAAGGGAATTTGCAGACAGTGCAAGCATTTGTATCTGAATAATGATCGGTAA  
>HPV12\_Beta\_396910\_nt607\_E6\_AOS|1  
GGTTAGAGACAGGTGGAAGGGAATTTGCAGACAGTGCAAGCATTTGTATCTGAATAATGA  
>HPV12\_Beta\_396910\_nt474\_E6\_AOS|1  
TGCTAGGTAGAGATATAGAGCTTGCTACTGGAAAATCTATATTTGACTTAAAGATAAGGT  
>HPV14D\_Beta\_396918\_nt260\_E6\_AOS|1  
GTGATAGCACAGAAACCAAATCTTCTTTTATAGAGCCACCATTACCTGCAACTATATTTG  
>HPV14D\_Beta\_396918\_nt380\_E6\_AOS|1  
GTAATTTTTTGACTCATTTAGAAGTCTGTGAATTTGATGAGAAAAAACTAAGTCTAATTT  
>HPV14D\_Beta\_396918\_nt302\_E6\_AOS|1  
TACCTGCAACTATATTTGGCTTAGCAAACCTATTGGAAATACCACTAGATGATTGTTTAG  
>HPV14D\_Beta\_396918\_nt287\_E6\_AOS|1  
TTATAGAGCCACCATTACCTGCAACTATATTTGGCTTAGCAAACCTATTGGAAATACCAC  
>HPV14D\_Beta\_396918\_nt280\_E6\_AOS|1  
TCTTCTTTTATAGAGCCACCATTACCTGCAACTATATTTGGCTTAGCAAACCTATTGGAA  
>HPV14D\_Beta\_396918\_nt246\_E6\_AOS|1  
TAAGAGTAACTATTGTGATAGCACAGAAACCAAATCTTCTTTTATAGAGCCACCATTACC  
>HPV14D\_Beta\_396918\_nt239\_E6\_AOS|1  
CTTCTCCTAAGAGTAACTATTGTGATAGCACAGAAACCAAATCTTCTTTTATAGAGCCAC

>HPV15\_Beta\_396924\_nt436\_E6\_AOS|1  
GTCGGTGTGTAGTTGGGAAATAGAGATAGTAGAACAGAAGCCTGTTGGAGATATTATTAT  
>HPV15\_Beta\_396924\_nt447\_E6\_AOS|1  
GTTGGGAAATAGAGATAGTAGAACAGAAGCCTGTTGGAGATATTATTATTCGCTGCAAAT  
>HPV15\_Beta\_396924\_nt429\_E6\_AOS|1  
ATGAACAGTCGGTGTGTAGTTGGGAAATAGAGATAGTAGAACAGAAGCCTGTTGGAGATA  
>HPV15\_Beta\_396924\_nt422\_E6\_AOS|1  
AACTTTTATGAACAGTCGGTGTGTAGTTGGGAAATAGAGATAGTAGAACAGAAGCCTGTT  
>HPV15\_Beta\_396924\_nt415\_E6\_AOS|1  
ATTTTCTAACTTTTATGAACAGTCGGTGTGTAGTTGGGAAATAGAGATAGTAGAACAGAA  
>HPV17\_Beta\_396932\_nt447\_E6\_AOS|1  
GAAGGGAGTTAGAGGAAATAGAGCACAAAGCCAATAGGGGAAATACCTATTCGCTGCAAGT  
>HPV17\_Beta\_396932\_nt527\_E6\_AOS|1  
TTACTAGAGAAGTTAGACACTTGTTATAGACATCAGCAGTTTCATAAGGTTAGACGCAAT  
>HPV17\_Beta\_396932\_nt519\_E6\_AOS|1  
AATTGGATTTACTAGAGAAGTTAGACACTTGTTATAGACATCAGCAGTTTCATAAGGTTA  
>HPV17\_Beta\_396932\_nt440\_E6\_AOS|2  
GTGAGTGGAAGGGAGTTAGAGGAAATAGAGCACAAAGCCAATAGGGGAAATACCTATTCGC  
>HPV17\_Beta\_396932\_nt432\_E6\_AOS|1  
AACAAATCAGTGAGTGGAAGGGAGTTAGAGGAAATAGAGCACAAAGCCAATAGGGGAAATAC  
>HPV17\_Beta\_396932\_nt422\_E6\_AOS|1  
AAGTTTTATGAACAATCAGTGAGTGGAAGGGAGTTAGAGGAAATAGAGCACAAAGCCAATA  
>HPV17\_Beta\_396932\_nt288\_E6\_AOS|1  
GTAATAGGTTTTTTAGCTTACATAGAATTGGTGGCGTTTTGATTTAAAAGGTTTGCAGTTAA  
>HPV17\_Beta\_396932\_nt281\_E6\_AOS|2  
AGATTTTGTAAATAGGTTTTTTAGCTTACATAGAATTGGTGGCGTTTTGATTTAAAAGGTTTG  
>HPV19\_Beta\_396940\_nt491\_E6\_AOS|1  
TTCTATGAGCATACTGTAACAGGTAGAGAAATTGAGTTTGTAACAGGTAAATCTGTCTTT  
>HPV19\_Beta\_396940\_nt484\_E6\_AOS|1  
TAATGAGTTCTATGAGCATACTGTAACAGGTAGAGAAATTGAGTTTGTAACAGGTAAATC  
>HPV19\_Beta\_396940\_nt474\_E6\_AOS|1  
CATTTGAATTTAATGAGTTCTATGAGCATACTGTAACAGGTAGAGAAATTGAGTTTGTA  
>HPV19\_Beta\_396940\_nt361\_E6\_AOS|2  
CAAGTTTTTTATCACATTTAGAAAGCGTGCGAATTTGATGATAAAAGACTTAGTTTGATTTG  
>HPV19\_Beta\_396940\_nt354\_E6\_AOS|1  
TCTGTGGCAAGTTTTTTATCACATTTAGAAAGCGTGCGAATTTGATGATAAAAGACTTAGTT  
>HPV19\_Beta\_396940\_nt288\_E6\_AOS|1  
CAACAATTGCTGGATTAGCAGCATTGCTAGAAATACCGTTGGATGACTGTTTAGTGCCTT  
>HPV25\_Beta\_396948\_nt456\_E6\_AOS|1  
CCACATTTGAATTTAATGAATTTTACGAAAGCACTGTAACAGGTAGGGAAATTGAAGACG  
>HPV25\_Beta\_396948\_nt469\_E6\_AOS|1  
TAATGAATTTTACGAAAGCACTGTAACAGGTAGGGAAATTGAAGACGTTACAGGTAAATC  
>HPV25\_Beta\_396948\_nt345\_E6\_AOS|1  
GCAACTTTCTAACATATTTAGAGATCTGTGAGTTTGATGAGAAAAGACTTAGTTTGATTT  
>HPV25\_Beta\_396948\_nt338\_E6\_AOS|1  
TTCTGTGGCAACTTTCTAACATATTTAGAGATCTGTGAGTTTGATGAGAAAAGACTTAGT  
>HPV25\_Beta\_396948\_nt266\_E6\_AOS|1  
TTGCCAGCAACAATTACTGATCTAGCAGCTTTATTGGAAATTCATTAGATGATTGCTTA  
>HPV25\_Beta\_396948\_nt259\_E6\_AOS|1  
GCCACCATTGCCAGCAACAATTACTGATCTAGCAGCTTTATTGGAAATTCATTAGATGA  
>HPV25\_Beta\_396948\_nt252\_E6\_AOS|1  
TTATACAGCCACCATTGCCAGCAACAATTACTGATCTAGCAGCTTTATTGGAAATTCAT  
>HPV25\_Beta\_396948\_nt212\_E6\_AOS|1  
AATGCTGAACAGAGCATAGGACCACCAGAGCAAGCGCAGGTTATACAGCCACCATTGCCA  
>HPV27\_Alpha\_396964\_nt213\_E6\_AOS|1

AGACGAGCGCTTTCAGACGCTGATGTATTGGCATTGCAATAAAAGAACTGTCTGTAGTG  
>HPV27\_Alpha\_396964\_nt199\_E6\_AOS|1  
TCTGCGTGTATTGCAGACGAGCGCTTTCAGACGCTGATGTATTGGCATTGCAATAAAAG  
>HPV30\_Alpha\_396973\_nt133\_E6\_AOS|1  
GCCACGCTACTGTGCACCATCTTTGTGAGGTACAAGAAACATCGTTGCTGGAGCTACAGC  
>HPV30\_Alpha\_396973\_nt140\_E6\_AOS|1  
TACTGTGCACCATCTTTGTGAGGTACAAGAAACATCGTTGCTGGAGCTACAGCTACAGTG  
>HPV3\_Alpha\_397005\_nt164\_E6\_AOS|1  
CACCGGAATAGGATTTGACGACCTTCGCCTGCCTGCATATTCTGTACGAAACAGCTGAC  
>HPV3\_Alpha\_397005\_nt205\_E6\_AOS|1  
TCTGTACGAAACAGCTGACTACAACCTGAACCTACAAGCATTGTCATTACGGGAACTGAATG  
>HPV3\_Alpha\_397005\_nt196\_E6\_AOS|1  
ACTGCATATTCTGTACGAAACAGCTGACTACAACCTGAACCTACAAGCATTGTCATTACGGG  
>HPV3\_Alpha\_397005\_nt189\_E6\_AOS|1  
CGCCTGCACTGCATATTCTGTACGAAACAGCTGACTACAACCTGAACCTACAAGCATTGCA  
>HPV3\_Alpha\_397005\_nt173\_E6\_AOS|1  
AGGATTTGACGACCTTCGCCTGCACTGCATATTCTGTACGAAACAGCTGACTACAACCTGA  
>HPV3\_Alpha\_397005\_nt148\_E6\_AOS|1  
TTCTACTGTGCAGAAACACCGGAATAGGATTTGACGACCTTCGCCTGCACTGCATATTCT  
>HPV40\_Alpha\_397014\_nt310\_E6\_AOS|1  
ACGGAAGTAAACCAATACAGAACTTTAGATACGCAGCCTATGCACCAACCGTGGAAG  
>HPV40\_Alpha\_397014\_nt303\_E6\_AOS|1  
GACCTGCACGGAAGTAAACCAATACAGAACTTTAGATACGCAGCCTATGCACCAACC  
>HPV40\_Alpha\_397014\_nt296\_E6\_AOS|2  
GTGCCTGGACCTGCACGGAAGTAAACCAATACAGAACTTTAGATACGCAGCCTATGC  
>HPV40\_Alpha\_397014\_nt289\_E6\_AOS|1  
GTCCACGGTGCCTGGACCTGCACGGAAGTAAACCAATACAGAACTTTAGATACGCAG  
>HPV40\_Alpha\_397014\_nt282\_E6\_AOS|1  
GCCGCATGTCCACGGTGCCTGGACCTGCACGGAAGTAAACCAATACAGAACTTTAGA  
>HPV40\_Alpha\_397014\_nt275\_E6\_AOS|1  
TCCACACGCCGCATGTCCACGGTGCCTGGACCTGCACGGAAGTAAACCAATACAGAAA  
>HPV45\_Alpha\_397022\_nt498\_E6\_AOS|1  
CAGTACCGAGGGCAGTGTAAATACATGTTGTGACCAGGCACGGCAAGAAAGACTTCGCAGA  
>HPV52\_Alpha\_397038\_nt368\_E6\_AOS|1  
AGAGAGGGTAAAAAAACCATTAAAGTGAAATAACTATTAGATGTATAATTTGTCAAACGCC  
>HPV52\_Alpha\_397038\_nt361\_E6\_AOS|1  
CATTAGAAGAGAGGGTAAAAAAACCATTAAAGTGAAATAACTATTAGATGTATAATTTGTC  
>HPV52\_Alpha\_397038\_nt354\_E6\_AOS|1  
GGGAAAACATTAGAAGAGAGGGTAAAAAAACCATTAAAGTGAAATAACTATTAGATGTATA  
>HPV52\_Alpha\_397038\_nt347\_E6\_AOS|1  
ACTGTATGGGAAAACATTAGAAGAGAGGGTAAAAAAACCATTAAAGTGAAATAACTATTAG  
>HPV52\_Alpha\_397038\_nt340\_E6\_AOS|1  
AATATTCACTGTATGGGAAAACATTAGAAGAGAGGGTAAAAAAACCATTAAAGTGAAATAA  
>HPV52\_Alpha\_397038\_nt333\_E6\_AOS|1  
CATTATCAATATTCCTGTATGGGAAAACATTAGAAGAGAGGGTAAAAAAACCATTAAAGT  
>HPV52\_Alpha\_397038\_nt326\_E6\_AOS|1  
ATATAGGCATTATCAATATTCCTGTATGGGAAAACATTAGAAGAGAGGGTAAAAAAACC  
>HPV52\_Alpha\_397038\_nt319\_E6\_AOS|1  
TAAGTGAATATAGGCATTATCAATATTCCTGTATGGGAAAACATTAGAAGAGAGGGTAA  
>HPV52\_Alpha\_397038\_nt305\_E6\_AOS|1  
CTTTTTATCTAAGATAAGTGAATATAGGCATTATCAATATTCCTGTATGGGAAAACATT  
>HPV52\_Alpha\_397038\_nt298\_E6\_AOS|1  
GCCTACGCTTTTTATCTAAGATAAGTGAATATAGGCATTATCAATATTCCTGTATGGGA  
>HPV56\_Alpha\_397053\_nt268\_E6\_AOS|2  
TGTATAGGGATGATTTTCCTTATGCAGTGTGCAGAGTATGTTTATTGTTTTATAGTAAAG

>HPV56\_Alpha\_397053\_nt261\_E6\_AOS|2  
AAATTAGTGTATAGGGATGATTTTCCTTATGCAGTGTGCAGAGTATGTTTATTGTTTTAT  
>HPVcand62\_Alpha\_39932599\_nt188\_E6\_AOS|1  
CAGCATGCCTATTGAGAGAGATTAAAGTAAGAGAGCTACGGCGGTGGCAGCACTCATGCT  
>HPVcand62\_Alpha\_39932599\_nt205\_E6\_AOS|1  
GAGATTAAAGTAAGAGAGCTACGGCGGTGGCAGCACTCATGCTTTGGAATAACAGTAGAA  
>HPVcand62\_Alpha\_39932599\_nt198\_E6\_AOS|1  
ATTGAGAGAGATTAAAGTAAGAGAGCTACGGCGGTGGCAGCACTCATGCTTTGGAATAAC  
>HPV43\_Alpha\_40804474\_nt304\_E6\_AOS|1  
TACAGTTTCATGGAAAAATAAGTCAATATAGGCACCTTTGACTACGCAGCATATGCAGATA  
>HPV43\_Alpha\_40804474\_nt316\_E6\_AOS|1  
GAAAAATAAGTCAATATAGGCACCTTTGACTACGCAGCATATGCAGATACTGTAGAAGAAG  
>HPV43\_Alpha\_40804474\_nt297\_E6\_AOS|1  
GCCTGTCTACAGTTTCATGGAAAAATAAGTCAATATAGGCACCTTTGACTACGCAGCATAT  
>HPV43\_Alpha\_40804474\_nt290\_E6\_AOS|1  
ATGCTTGGCCTGTCTACAGTTTCATGGAAAAATAAGTCAATATAGGCACCTTTGACTACGC  
>HPV81\_Alpha\_40804509\_nt434\_E6\_AOS|1  
CTATAAACCGTTAACATACCAAGAAAAGGAGTATCTTGTGACAGGCCTAATCCACTTTCA  
>HPV81\_Alpha\_40804509\_nt427\_E6\_AOS|1  
ATGCATGCTATAAACCGTTAACATACCAAGAAAAGGAGTATCTTGTGACAGGCCTAATCC  
>HPV81\_Alpha\_40804509\_nt319\_E6\_AOS|1  
GCAGAGAAGCTAAAGTACGGGAGCTGCGGCGGTGGCAATATTCGTGCTTCGGACCAACAG  
>HPV81\_Alpha\_40804509\_nt102\_E6\_AOS|1  
ATGGTCAGCACAGCAGTGATGTGCTGCGGCGGAGCAAATCCTACCAATTTGTTTTTGCTG  
>HPV95\_Gamma\_40804520\_nt360\_E6\_AOS|2  
GGACTGGAAGATTTAGTAGGACAAAAATCAGGGATATATGTGTAAGATGTTTATGCTGT  
>HPV95\_Gamma\_40804520\_nt390\_E6\_AOS|1  
AGGGATATATGTGTAAGATGTTTATGCTGTCTTAACTATTAGACATAGTAGAAAACTT  
>HPV95\_Gamma\_40804520\_nt383\_E6\_AOS|1  
AAAAATCAGGGATATATGTGTAAGATGTTTATGCTGTCTTAACTATTAGACATAGTAGA  
>HPV95\_Gamma\_40804520\_nt376\_E6\_AOS|1  
TAGGACAAAAAATCAGGGATATATGTGTAAGATGTTTATGCTGTCTTAACTATTAGACA  
>HPV95\_Gamma\_40804520\_nt369\_E6\_AOS|1  
GATTTAGTAGGACAAAAAATCAGGGATATATGTGTAAGATGTTTATGCTGTCTTAACTA  
>HPV95\_Gamma\_40804520\_nt353\_E6\_AOS|1  
TGCTACTGGACTGGAAGATTTAGTAGGACAAAAAATCAGGGATATATGTGTAAGATGTTT  
>HPV95\_Gamma\_40804520\_nt346\_E6\_AOS|1  
CTGTATATGCTACTGGACTGGAAGATTTAGTAGGACAAAAAATCAGGGATATATGTGTAA  
>HPV94\_Alpha\_40804528\_nt175\_E6\_AOS|1  
GCTGCGTGTTCTGCACCAAACAGCTGACCGTAGCCGAATTGACTGCATTTGCATTAAGAG  
>HPV94\_Alpha\_40804528\_nt183\_E6\_AOS|1  
TTCTGCACCAAACAGCTGACCGTAGCCGAATTGACTGCATTTGCATTAAGAGAATTGAAT  
>HPV94\_Alpha\_40804528\_nt138\_E6\_AOS|1  
AGGAACTGTGGAATATCATTTGAGGACCTTCGCCTGTGCTGCGTGTTCTGCACCAAACAG  
>HPV94\_Alpha\_40804528\_nt130\_E6\_AOS|1  
TATTGTGTAGGAACTGTGGAATATCATTTGAGGACCTTCGCCTGTGCTGCGTGTTCTGCA  
>HPVcand85\_Alpha\_4574720\_nt141\_E6\_AOS|2  
AAACTACCAGACCTATGCAACACACTGGACACATCACTGCAAGATATAGAAATAAGCTGT  
>HPVcand85\_Alpha\_4574720\_nt404\_E6\_AOS|1  
TATATTAATAAGGTGTTTACGGTGTCAAAAACCTTTATGTCCGGCAGAAAACTAAAACA  
>HPVcand85\_Alpha\_4574720\_nt397\_E6\_AOS|1  
TATATGATATATTAATAAGGTGTTTACGGTGTCAAAAACCTTTATGTCCGGCAGAAAAAC  
>HPVcand85\_Alpha\_4574720\_nt312\_E6\_AOS|1  
ATGTTTTTATTCTAAAATAAGAGAACTAAGATATTATAGCGACTCTGTGTATGGGGAAACG  
>HPVcand85\_Alpha\_4574720\_nt151\_E6\_AOS|1

ACCTATGCAACACACTGGACACATCACTGCAAGATATAGAAATAAGCTGTGTATATTGTA  
>HPV96\_Beta\_50253426\_nt260\_E6\_AOS|1  
TGTGTGGCAATTACAACCTGCCACTCATAACAAGTAACCGCCTGCGTTTCTAGGACATTT  
>HPV96\_Beta\_50253426\_nt253\_E6\_AOS|1  
GAGAGGTTGTTGGCAATTACAACCTGCCACTCATAACAAGTAACCGCCTGCGTTTCTAG  
>HPV96\_Beta\_50253426\_nt225\_E6\_AOS|1  
CTCTCTCGGTTGCCAAAAGTTTTATCTTGAGAGGTTGTTGGCAATTACAACCTGCCACTC  
>HPV96\_Beta\_50253426\_nt218\_E6\_AOS|1  
TTGCGAACTCTCTCGGTTGCCAAAAGTTTTATCTTGAGAGGTTGTTGGCAATTACAACCT  
>HPV96\_Beta\_50253426\_nt210\_E6\_AOS|1  
CGGTAAGTTTCGCAACTCTCTCGGTTGCCAAAAGTTTTATCTTGAGAGGTTGTTGGCAAT  
>HPV96\_Beta\_50253426\_nt141\_E6\_AOS|2  
TTTGCCAAAAGCAGTTTAAACCTGCCAAGAAAAGCCCCGCAAAACGTCTGCCAACTTTGG  
>HPV96\_Beta\_50253426\_nt116\_E6\_AOS|1  
CCTGGAACAACACCGATCCAGTGGCTTTGCCAAAAGCAGTTTAAACCTGCCAAGAAAAGC  
>HPV96\_Beta\_50253426\_nt109\_E6\_AOS|1  
AGTCACTCCTGGAACAACACCGATCCAGTGGCTTTGCCAAAAGCAGTTTAAACCTGCCAA  
>HPV96\_Beta\_50253426\_nt102\_E6\_AOS|1  
TCCTGGCAGTCACTCCTGGAACAACACCGATCCAGTGGCTTTGCCAAAAGCAGTTTAAAC  
>HPV96\_Beta\_50253426\_nt94\_E6\_AOS|1  
GTATCTGATCCTGGCAGTCACTCCTGGAACAACACCGATCCAGTGGCTTTGCCAAAAGCA  
>HPV83\_Alpha\_5059324\_nt192\_E6\_AOS|1  
TCTACGTAAAGCAGCAAAGGTGCGAGAGCTACGGCACTGGAGCCACTCAAGCTACGGGGC  
>HPV83\_Alpha\_5059324\_nt257\_E6\_AOS|1  
TAGAAGAAGAAACAAAAACACCACTGGCACAGCTGTATATACGATGCCATATGTGCCTGA  
>HPV83\_Alpha\_5059324\_nt250\_E6\_AOS|1  
GCAACAGTAGAAGAAGAAACAAAAACACCACTGGCACAGCTGTATATACGATGCCATATG  
>HPV83\_Alpha\_5059324\_nt185\_E6\_AOS|1  
CACAGTGTCTACGTAAAGCAGCAAAGGTGCGAGAGCTACGGCACTGGAGCCACTCAAGCT  
>HPV83\_Alpha\_5059324\_nt178\_E6\_AOS|1  
GCGTGTGCACAGTGTCTACGTAAAGCAGCAAAGGTGCGAGAGCTACGGCACTGGAGCCAC  
>HPV59\_Alpha\_557236\_nt372\_E6\_AOS|1  
TAGATGCCTAAAACCTCTATGTCCAACAGATAAATTAAAGCATATAACTGAAAAAGAAG  
>HPV59\_Alpha\_557236\_nt365\_E6\_AOS|1  
GCTGTTATAGATGCCTAAAACCTCTATGTCCAACAGATAAATTAAAGCATATAACTGAAA  
>HPV6\_Alpha\_6002612\_nt440\_E6\_AOS|1  
AAGTAGAAAAGGTAAAACATATACTAACCAAGGCACGGTTCATAAAGCTAAATTGTACGT  
>HPV57\_Alpha\_60882\_nt499\_E6\_AOS|1  
CCGGACATTGCATGAACTGTGCGCCAAGATGCATGGAGAACGCCCCAGCCTTGAGGACAT  
>HPV57\_Alpha\_60882\_nt506\_E6\_AOS|1  
TTGCATGAACTGTGCGCCAAGATGCATGGAGAACGCCCCAGCCTTGAGGACATCACACTA  
>HPV57\_Alpha\_60882\_nt492\_E6\_AOS|1  
CAGTGGACCGGACATTGCATGAACTGTGCGCCAAGATGCATGGAGAACGCCCCAGCCTTG  
>HPV69\_Alpha\_6970418\_nt275\_E6\_AOS|1  
TGCATATGGTGCATGTAAAAAATGTATAATATTCTATTCAAAAATAATAGAATATAGACG  
>HPV69\_Alpha\_6970418\_nt268\_E6\_AOS|1  
ATGATAGTGCATATGGTGCATGTAAAAAATGTATAATATTCTATTCAAAAATAATAGAAT  
>HPV69\_Alpha\_6970418\_nt261\_E6\_AOS|2  
TATAGAAATGATAGTGCATATGGTGCATGTAAAAAATGTATAATATTCTATTCAAAAATA  
>HPV69\_Alpha\_6970418\_nt254\_E6\_AOS|1  
AATAGTGTATAGAAATGATAGTGCATATGGTGCATGTAAAAAATGTATAATATTCTATTTC  
>HPV82\_Alpha\_6970427\_nt498\_E6\_AOS|1  
ACGGGACAGTGTGCAAATTGCAGAAAACCACCAAGACAACGTAGTGAAACCCAGGTGTAA  
>HPV82\_Alpha\_6970427\_nt491\_E6\_AOS|1  
ACGCTGGACGGGACAGTGTGCAAATTGCAGAAAACCACCAAGACAACGTAGTGAAACCCA

>HPV82\_Alpha\_6970427\_nt263\_E6\_AOS|1  
TAGGGACAATACGCCATATGCAGCATGCAAAAAATGCCTAATGTTTTATTCTAGAAATTAG  
>HPV82\_Alpha\_6970427\_nt249\_E6\_AOS|1  
CTTAGGATTGTATATAGGGACAATACGCCATATGCAGCATGCAAAAAATGCCTAATGTTT  
>HPV82\_Alpha\_6970427\_nt242\_E6\_AOS|1  
TACAGAACTTAGGATTGTATATAGGGACAATACGCCATATGCAGCATGCAAAAAATGCCT  
>HPV82\_Alpha\_6970427\_nt154\_E6\_AOS|1  
CCTGCAATACGTCTATGCACAATATTCAGGTATTGTGTGTATATTGTAAAAAGGAGTTGT  
>HPV82\_Alpha\_6970427\_nt139\_E6\_AOS|1  
ACGAATTATGTGAAGCCTGCAATACGTCTATGCACAATATTCAGGTATTGTGTGTATATT  
>HPV68a\_Alpha\_71726685\_nt103\_E6\_AOS|1  
TGCAGAAAGCAACTACAACGGACAGAGGTATATGAATTTGCCTTTAGTGACCTATGTGTA  
>HPV97\_Alpha\_71726694\_nt342\_E6\_AOS|1  
AGCAGACAAATATAAACATCTTAAAGACAAACGACGATTCCACCACATATCTGGTTATTA  
>HPV97\_Alpha\_71726694\_nt352\_E6\_AOS|1  
TATAAACATCTTAAAGACAAACGACGATTCCACCACATATCTGGTTATTATAGAGGCCAG  
>HPV97\_Alpha\_71726694\_nt335\_E6\_AOS|1  
TGAATCCAGCAGACAAATATAAACATCTTAAAGACAAACGACGATTCCACCACATATCTG  
>HPV106\_Alpha\_71726710\_nt16\_E6\_AOS|1  
AGAGATATGTTGCTTCAGCACAAAATAGCCATGACCAACGGAGACTGCTGTCCAAAGAAT  
>HPV106\_Alpha\_71726710\_nt286\_E6\_AOS|1  
TCCAGCTATGCACCCACAGTGGAGTATGAAACAGGGATACCAATACTAGAGCTGTTTATT  
>HPV106\_Alpha\_71726710\_nt279\_E6\_AOS|1  
GGACTACTCCAGCTATGCACCCACAGTGGAGTATGAAACAGGGATACCAATACTAGAGCT  
>HPV106\_Alpha\_71726710\_nt243\_E6\_AOS|1  
GAAAGCAGCTGGAAAACCTTAGACAATTTAGATACTGGGACTACTCCAGCTATGCACCCAC  
>HPV106\_Alpha\_71726710\_nt9\_E6\_AOS|1  
ATATAAAAGAGATATGTTGCTTCAGCACAAAATAGCCATGACCAACGGAGACTGCTGTCC  
>HPV102\_Alpha\_71726718\_nt240\_E6\_AOS|1  
CAGCTACGGCGCAACGGTTGAAGAAGAAACCCGCACAGCATTACCACAGCTGTATATGAG  
>HPV102\_Alpha\_71726718\_nt233\_E6\_AOS|1  
ACTACTCCAGCTACGGCGCAACGGTTGAAGAAGAAACCCGCACAGCATTACCACAGCTGT  
>HPV102\_Alpha\_71726718\_nt226\_E6\_AOS|1  
CACTGGAAGTACTCCAGCTACGGCGCAACGGTTGAAGAAGAAACCCGCACAGCATTACCA  
>HPV102\_Alpha\_71726718\_nt215\_E6\_AOS|1  
GGGAAGTACGGCACTGGAAGTACTCCAGCTACGGCGCAACGGTTGAAGAAGAAACCCGCA  
>HPV13\_Alpha\_85827580\_nt291\_E6\_AOS|1  
CTTGTGCATGCTGCTTAGAAATACAAGGAAAGATTAACCAGTTTAGGCATTTTGAAGTTCG  
>HPV13\_Alpha\_85827580\_nt284\_E6\_AOS|1  
TTTGCGGCTTGTGCATGCTGCTTAGAAATACAAGGAAAGATTAACCAGTTTAGGCATTTT  
>HPV13\_Alpha\_85827580\_nt277\_E6\_AOS|1  
GTTTCCATTTGCGGCTTGTGCATGCTGCTTAGAAATACAAGGAAAGATTAACCAGTTTAG  
>HPV13\_Alpha\_85827580\_nt270\_E6\_AOS|1  
GAGGATCGTTTCCATTTGCGGCTTGTGCATGCTGCTTAGAAATACAAGGAAAGATTAACC  
>HPV13\_Alpha\_85827580\_nt255\_E6\_AOS|1  
TATATATAGTGTGGCGAGGATCGTTTCCATTTGCGGCTTGTGCATGCTGCTTAGAAATAC  
>HPV13\_Alpha\_85827580\_nt248\_E6\_AOS|1  
AAGAGTTTATATATAGTGTGGCGAGGATCGTTTCCATTTGCGGCTTGTGCATGCTGCTTA  
>HPV13\_Alpha\_85827580\_nt240\_E6\_AOS|1  
TTCAGTATAAGAGTTTATATATAGTGTGGCGAGGATCGTTTCCATTTGCGGCTTGTGCAT  
>HPV13\_Alpha\_85827580\_nt220\_E6\_AOS|1  
CACGGCAGAGGTTTATTCATTTTCAGTATAAGAGTTTATATATAGTGTGGCGAGGATCGTT  
>HPV2\_Alpha\_9626032\_nt177\_E6\_AOS|1  
ATTTGCGATTGCTCTGTGTATGGTGCAACGGCCGTTATCAGAGGCTGACATATGGGCAT  
>HPV2\_Alpha\_9626032\_nt191\_E6\_AOS|1

TGTGTATGGTGCAAACGGCCGTTATCAGAGGCTGACATATGGGCATTTGCAATAAAAGAA  
>HPV2\_Alpha\_9626032\_nt184\_E6\_AOS|1  
ATTGCTCTGTGTATGGTGCAAACGGCCGTTATCAGAGGCTGACATATGGGCATTTGCAAT  
>HPV2\_Alpha\_9626032\_nt170\_E6\_AOS|1  
CTAGAGGATTTGCGATTGCTCTGTGTATGGTGCAAACGGCCGTTATCAGAGGCTGACATA  
>HPV41\_Nu\_9626041\_nt304\_E6\_AOS|1  
AAGGGGGGCCAACGGGTATTTGTTCTCAGTGTACTAGAGTGCTTGCAAGGCTGGAGTTCA  
>HPV41\_Nu\_9626041\_nt293\_E6\_AOS|1  
ATCCTGGGGAGAAGGGGGGCCAACGGGTATTTGTTCTCAGTGTACTAGAGTGCTTGCAAG  
>HPV41\_Nu\_9626041\_nt277\_E6\_AOS|1  
AGAGCTGTCTGTACTTATCCTGGGGAGAAGGGGGGCCAACGGGTATTTGTTCTCAGTGTA  
>HPV41\_Nu\_9626041\_nt270\_E6\_AOS|1  
TTCGACCAGAGCTGTCTGTACTTATCCTGGGGAGAAGGGGGGCCAACGGGTATTTGTTCT  
>HPV41\_Nu\_9626041\_nt259\_E6\_AOS|1  
ATATTTACGCTTTCGACCAGAGCTGTCTGTACTTATCCTGGGGAGAAGGGGGGCCAACGG  
>HPV41\_Nu\_9626041\_nt242\_E6\_AOS|1  
GATCCTTAGCGTATTGGATATTTACGCTTTCGACCAGAGCTGTCTGTACTTATCCTGGGG  
>HPV41\_Nu\_9626041\_nt233\_E6\_AOS|1  
TTGCTATAAGATCCTTAGCGTATTGGATATTTACGCTTTCGACCAGAGCTGTCTGTACTT  
>HPV41\_Nu\_9626041\_nt224\_E6\_AOS|1  
CTGCCATTATTGCTATAAGATCCTTAGCGTATTGGATATTTACGCTTTCGACCAGAGCTG  
>HPV41\_Nu\_9626041\_nt157\_E6\_AOS|1  
AGAAGCCACATACCATACGGGAGTTGTGTTTGGCGCAGCAGATAAATTATCCATGCATAC  
>HPV41\_Nu\_9626041\_nt150\_E6\_AOS|1  
GAGACGCAGAAGCCACATACCATACGGGAGTTGTGTTTGGCGCAGCAGATAAATTATCCA  
>HPV1\_Mu\_9626063\_nt416\_E6\_AOS|1  
AAACTGAGTGTTGCTGAAAAATTGGAGGTTGTGTCAAACGGAGAAAGAGTGCATAGAGTT  
>HPV1\_Mu\_9626063\_nt409\_E6\_AOS|1  
CATAAAAAAACTGAGTGTTGCTGAAAAATTGGAGGTTGTGTCAAACGGAGAAAGAGTGCA  
>HPV1\_Mu\_9626063\_nt117\_E6\_AOS|1  
TCCGGACCGTCAGACAGCTTTCGAAAGCCTCTGTATCCCATATATTGATGTTTTATTGC  
>HPV1\_Mu\_9626063\_nt110\_E6\_AOS|1  
ACACCAATCCGGACCGTCAGACAGCTTTCGAAAGCCTCTGTATCCCATATATTGATGTT  
>HPV18\_Alpha\_9626069\_nt142\_E6\_AOS|1  
AGCTACCTGATCTGTGCACGGAACCTGAACACTTCACTGCAAGACATAGAAATAACCTGTG  
>HPV4\_Gamma\_9626597\_nt202\_E6\_AOS|1  
TCGATCTTGCGGATCTTGCTTTATTCTATCTTAAGAACTTAGTTTAGTATTTAGAGGAA  
>HPV63\_Mu\_9626605\_nt124\_E6\_AOS|1  
CGGTTCGGGATCTGAGTTCTGCTCTCCGTATCCCATTTATTGATTTGGTTGTTCTTGCA  
>HPV63\_Mu\_9626605\_nt214\_E6\_AOS|1  
AAAAATTGCTGTTTGATTATTTTGAATTGCTATCTTATCTGGCGAGATAATTTTCGTGTTTG  
>HPV63\_Mu\_9626605\_nt117\_E6\_AOS|1  
GTACATTCGGTTCGGGATCTGAGTTCTGCTCTCCGTATCCCATTTATTGATTTGGTTGTT  
>HPV16\_Alpha\_9627100\_nt484\_E6\_AOS|1  
TATAAGGGGTCGGTGGACCGGTCGATGTATGTCTTGTTGCAGATCATCAAGAACACGTAG  
>HPV5\_Beta\_9627145\_nt429\_E6\_AOS|2  
GCTGTGGCGCCACTGCAACTTATGAATTTAACCAATTTTATGAGCAGACAGTGTAGGAA  
>HPV5\_Beta\_9627145\_nt419\_E6\_AOS|1  
TGTCGCGTATGCTGTGGCGCCACTGCAACTTATGAATTTAACCAATTTTATGAGCAGACA  
>HPV5\_Beta\_9627145\_nt251\_E6\_AOS|1  
GAATTACCTTTAAGTATTAGAGACTTAGCTGAAGCCTTAGGCATCCCTGTGATTGATTGT  
>HPV5\_Beta\_9627145\_nt244\_E6\_AOS|1  
TAAGGCAGAATTACCTTTAAGTATTAGAGACTTAGCTGAAGCCTTAGGCATCCCTGTGAT  
>HPV5\_Beta\_9627145\_nt237\_E6\_AOS|1  
AAAAAGATAAGGCAGAATTACCTTTAAGTATTAGAGACTTAGCTGAAGCCTTAGGCATCC



>HPV10\_Alpha\_9627257\_nt146\_E6\_AOS|1  
TAGAAATTGTGGAATACCTTTGGAGGACCTTCGCCTGTGCTGTATATTTTGCACAAAACA  
>HPV10\_Alpha\_9627257\_nt192\_E6\_AOS|1  
TTTTGCACAAAACAGCTGACCGCAGCGGAATTGGCAGCATTTGCACTTAGAGAATTATAT  
>HPV10\_Alpha\_9627257\_nt185\_E6\_AOS|1  
CTGTATATTTTGCACAAAACAGCTGACCGCAGCGGAATTGGCAGCATTTGCACTTAGAGA  
>HPV10\_Alpha\_9627257\_nt139\_E6\_AOS|1  
TTTTGTGTAGAAATTGTGGAATACCTTTGGAGGACCTTCGCCTGTGCTGTATATTTTGCA  
>HPV26\_Alpha\_9627305\_nt240\_E6\_AOS|1  
TGACCTAAGAGTAGTATATAGAGATAGGAGTCCGTATGCTGCATGCAAAAGATGTGTAAT  
>HPV26\_Alpha\_9627305\_nt255\_E6\_AOS|1  
ATATAGAGATAGGAGTCCGTATGCTGCATGCAAAAGATGTGTAATATTTTATTCAAAAAT  
>HPV26\_Alpha\_9627305\_nt248\_E6\_AOS|1  
GAGTAGTATATAGAGATAGGAGTCCGTATGCTGCATGCAAAAGATGTGTAATATTTTATT  
>HPV26\_Alpha\_9627305\_nt233\_E6\_AOS|1  
CAATTTGTGACCTAAGAGTAGTATATAGAGATAGGAGTCCGTATGCTGCATGCAAAAGAT  
>HPV26\_Alpha\_9627305\_nt226\_E6\_AOS|1  
AATTTTGCATTTGTGACCTAAGAGTAGTATATAGAGATAGGAGTCCGTATGCTGCATGC  
>HPV26\_Alpha\_9627305\_nt103\_E6\_AOS|1  
GAGGATCCTAGAGAACGACCCAGAACGCTACATGAGCTATGTGAAAGCTTGAATACTACT  
>HPV32\_Alpha\_9627327\_nt439\_E6\_AOS|1  
CAAGTGAGAAAAGATCATCATATTTATAACGGACGGCATTTCAGATTCATTTTAAATAGGT  
>HPV32\_Alpha\_9627327\_nt432\_E6\_AOS|1  
TTATCGCCAAGTGAGAAAAGATCATCATATTTATAACGGACGGCATTTCAGATTCATTTTA  
>HPV32\_Alpha\_9627327\_nt425\_E6\_AOS|1  
AAAGCCTTTATCGCCAAGTGAGAAAAGATCATCATATTTATAACGGACGGCATTTCAGATT  
>HPV32\_Alpha\_9627327\_nt169\_E6\_AOS|1  
CCCTGCGGAATTTACAAATCTGCTGTATTTGGTGTAAAAACCACTTAACCAGTGCTGAAG  
>HPV32\_Alpha\_9627327\_nt151\_E6\_AOS|1  
GCAAAGATTTTGGGCTGACCCTGCGGAATTTACAAATCTGCTGTATTTGGTGTAAAAACC  
>HPV34\_Alpha\_9627334\_nt141\_E6\_AOS|1  
CCAGCCTTATGTGAAGAGGTCAACATTTCAATACATGAAATAGAATTGGACTGTGTGTAT  
>HPV49\_Beta\_9627363\_nt411\_E6\_AOS|1  
CTAATTATCACCAAGAAATTGTCGTAGGCATCGAAATAGAAGGACGAGCAGCGGCTAATA  
>HPV49\_Beta\_9627363\_nt461\_E6\_AOS|2  
GCGGCTAATATTGCTGAGATAGTAGTCAGATGTCTCATTTGCCTTAAGAGGCTAGATTTG  
>HPV49\_Beta\_9627363\_nt454\_E6\_AOS|1  
ACGAGCAGCGGCTAATATTGCTGAGATAGTAGTCAGATGTCTCATTTGCCTTAAGAGGCT  
>HPV49\_Beta\_9627363\_nt447\_E6\_AOS|1  
TAGAAGGACGAGCAGCGGCTAATATTGCTGAGATAGTAGTCAGATGTCTCATTTGCCTTA  
>HPV49\_Beta\_9627363\_nt393\_E6\_AOS|2  
CAGCATATCACGAGTTTACTAATTATCACCAAGAAATTGTCGTAGGCATCGAAATAGAAG  
>HPV49\_Beta\_9627363\_nt386\_E6\_AOS|1  
TATAGATCAGCATATCACGAGTTTACTAATTATCACCAAGAAATTGTCGTAGGCATCGAA  
>HPV49\_Beta\_9627363\_nt379\_E6\_AOS|1  
TTGTGCCTATAGATCAGCATATCACGAGTTTACTAATTATCACCAAGAAATTGTCGTAGG  
>HPV49\_Beta\_9627363\_nt372\_E6\_AOS|1  
GTGCAGCTTGTGCCTATAGATCAGCATATCACGAGTTTACTAATTATCACCAAGAAATTG  
>HPV49\_Beta\_9627363\_nt365\_E6\_AOS|1  
GGTTGTTGTGCAGCTTGTGCCTATAGATCAGCATATCACGAGTTTACTAATTATCACCAA  
>HPV49\_Beta\_9627363\_nt358\_E6\_AOS|1  
TGTCTTTGGTTGTTGTGCAGCTTGTGCCTATAGATCAGCATATCACGAGTTTACTAATTA  
>HPV53\_Alpha\_9627377\_nt311\_E6\_AOS|1  
TTTGCTATTTTATAGTAAGGTCCGAAAATTAAGATATTACAATTGTTTCAGTGACGGGGC  
>HPV53\_Alpha\_9627377\_nt342\_E6\_AOS|1

AGATATTACAATTGTTTCAGTGTACGGGGCTAGCCTGGAAGCACTAACTAAAAAAGTTA  
>HPV53\_Alpha\_9627377\_nt335\_E6\_AOS|1  
AAAATTAAGATATTACAATTGTTTCAGTGTACGGGGCTAGCCTGGAAGCACTAACTAAAA  
>HPV53\_Alpha\_9627377\_nt328\_E6\_AOS|1  
AGGTCCGAAAAATTAAGATATTACAATTGTTTCAGTGTACGGGGCTAGCCTGGAAGCACTAA  
>HPV53\_Alpha\_9627377\_nt321\_E6\_AOS|2  
TATAGTAAGGTCCGAAAAATTAAGATATTACAATTGTTTCAGTGTACGGGGCTAGCCTGGAA  
>HPV7\_Alpha\_9627389\_nt296\_E6\_AOS|1  
GTGTTTAGAATTTTATGGAAAAGTGAATCAGTATAGGAACTTTAGATACGCTGCATATGC  
>HPV7\_Alpha\_9627389\_nt289\_E6\_AOS|1  
GTGTAAAGTGTTTAGAATTTTATGGAAAAGTGAATCAGTATAGGAACTTTAGATACGCTG  
>HPV7\_Alpha\_9627389\_nt282\_E6\_AOS|1  
GCAGCGTGTGTAAAGTGTTTAGAATTTTATGGAAAAGTGAATCAGTATAGGAACTTTAGA  
>HPV7\_Alpha\_9627389\_nt106\_E6\_AOS|1  
CTGCACGTTGCGGCTCCACAGCTAGAACTTTATTTGAATTATGTGACCAGTGCAATATAA  
>HPV9\_Beta\_9627396\_nt420\_E6\_AOS|1  
CGTCTGCACAGTTAGAATTTACACATTTTTCATTTGCTGTAGTTGGAAAAGATATAG  
>HPV9\_Beta\_9627396\_nt460\_E6\_AOS|1  
TGTAGTTGGAAAAGATATAGAACTGTAGAAGGAACAGCTATTGGAAATATTTGTATTAG  
>HPV9\_Beta\_9627396\_nt453\_E6\_AOS|1  
AATTTGCTGTAGTTGGAAAAGATATAGAACTGTAGAAGGAACAGCTATTGGAAATATTT  
>HPV9\_Beta\_9627396\_nt446\_E6\_AOS|1  
TTTTTTCAATTTGCTGTAGTTGGAAAAGATATAGAACTGTAGAAGGAACAGCTATTGGA  
>HPV9\_Beta\_9627396\_nt439\_E6\_AOS|1  
TACACATTTTTCATTTGCTGTAGTTGGAAAAGATATAGAACTGTAGAAGGAACAGC  
>HPV9\_Beta\_9627396\_nt432\_E6\_AOS|1  
TAGAATTTACACATTTTTCATTTGCTGTAGTTGGAAAAGATATAGAACTGTAGAAG  
>HPV54\_Alpha\_9628437\_nt314\_E6\_AOS|1  
GCACGGGCAAATAAATTATAGAAGGCATCGCGACCGTGCGTGCCTGTGGGAAACAGTGGA  
>HPV54\_Alpha\_9628437\_nt307\_E6\_AOS|1  
TAGAACTGCACGGGCAAATAAATTATAGAAGGCATCGCGACCGTGCGTGCCTGTGGGAAA  
>HPV54\_Alpha\_9628437\_nt300\_E6\_AOS|1  
CTGTGCCTAGAACTGCACGGGCAAATAAATTATAGAAGGCATCGCGACCGTGCGTGCCTG  
>HPV24\_Unclassified\_9628486\_nt231\_E6\_AOS|1  
TAGAACTTAGTAGATTATTAAATATACCATTAGACGATTGTGTTGTACCATGTAACTTTT  
>HPV24\_Unclassified\_9628486\_nt395\_E6\_AOS|1  
GTTGCTACAGCAGCATTTGAATTTGAAAATTATTTTGTAGAGAGTGTGATAGGTTGGGAA  
>HPV24\_Unclassified\_9628486\_nt385\_E6\_AOS|1  
ATATTGTTGTGTTGCTACAGCAGCATTTGAATTTGAAAATTATTTTGTAGAGAGTGTGAT  
>HPV24\_Unclassified\_9628486\_nt378\_E6\_AOS|1  
GTTGTAGATATTGTTGTGTTGCTACAGCAGCATTTGAATTTGAAAATTATTTTGTAGAGA  
>HPV24\_Unclassified\_9628486\_nt224\_E6\_AOS|1  
TCAGTGTTAGAACTTAGTAGATTATTAATATACCATTAGACGATTGTGTTGTACCATGT  
>HPV24\_Unclassified\_9628486\_nt217\_E6\_AOS|1  
ACCTCAGTCAGTGTTAGAACTTAGTAGATTATTAATATACCATTAGACGATTGTGTTGT  
>HPV48\_Gamma\_9628542\_nt214\_E6\_AOS|1  
ATCTTGCTTCTTTTCATAACAAACGACTGTCTGTAATTTGGAGAGATAATACACCATTTG  
>HPV50\_Gamma\_9628550\_nt402\_E6\_AOS|1  
GAAAATTGTATGTGTTTGTGGATTATATTGAAAAGTACGATTGTATTTGTCACGGTGGT  
>HPV50\_Gamma\_9628550\_nt426\_E6\_AOS|1  
TATATTGAAAAGTACGATTGTATTTGTCACGGTGGTTATTTTCATTTAGTTAGAGGTAAT  
>HPV50\_Gamma\_9628550\_nt419\_E6\_AOS|1  
GTTGGATTATATTGAAAAGTACGATTGTATTTGTCACGGTGGTTATTTTCATTTAGTTAG  
>HPV50\_Gamma\_9628550\_nt412\_E6\_AOS|1  
TGTGTTTGTGTTGGATTATATTGAAAAGTACGATTGTATTTGTCACGGTGGTTATTTTCATT

>HPV50\_Gamma\_9628550\_nt395\_E6\_AOS|1  
TCGCTGTGAAAATTGTATGTGTTTGGATTATATTGAAAAGTACGATTGTATTTGTCA  
>HPV60\_Gamma\_9628566\_nt383\_E6\_AOS|1  
TCCTTTGAGTTCTCTTTCTGTACGCTGTTTGGATTGCCTTACATTGTTATCTTTTGCAGA  
>HPV60\_Gamma\_9628566\_nt282\_E6\_AOS|1  
GCTTGTGTACTCCGTGTCTTAGACTTACTGCTAAATTTGAAGCTGAAAACATATTTTCAG  
>HPV61\_Alpha\_9628574\_nt292\_E6\_AOS|1  
TGGCACGTGAAGTAAAAGTGAGGGAGCTGCGACATTGGGACCATTCCCTGTTACGGACCCA  
>HPV61\_Alpha\_9628574\_nt318\_E6\_AOS|1  
CTGCGACATTGGGACCATTCCCTGTTACGGACCCACTGTGGAACAGACAACAGGACGGTCA  
>HPV61\_Alpha\_9628574\_nt285\_E6\_AOS|1  
CCATGCTTGGCACGTGAAGTAAAAGTGAGGGAGCTGCGACATTGGGACCATTCCCTGTTAC  
>HPV61\_Alpha\_9628574\_nt277\_E6\_AOS|1  
TATGCGCACCATGCTTGGCACGTGAAGTAAAAGTGAGGGAGCTGCGACATTGGGACCATT  
>HPV61\_Alpha\_9628574\_nt106\_E6\_AOS|1  
GACCGTGCAATCCAATAATTTTTCTGCTCTGCAAGGACTACGAGGTGGACTTTGAGG  
>HPV8\_Beta\_333074\_nt557\_E6\_AOS\_rc|1  
AGCCTCCTCTAACTTTATGAAAGGGACGGCCTCTCCACAGCAATCTAATTTCTCTATGA  
>HPV8\_Beta\_333074\_nt549\_E6\_AOS\_rc|1  
CTAACTTTATGAAAGGGACGGCCTCTCCACAGCAATCTAATTTCTCTATGATATCCAAA  
>HPV8\_Beta\_333074\_nt536\_E6\_AOS\_rc|1  
AGGGACGGCCTCTCCACAGCAATCTAATTTCTCTATGATATCCAAAAATGACAAGCAGT  
>HPV8\_Beta\_333074\_nt529\_E6\_AOS\_rc|1  
GCCTCTCCACAGCAATCTAATTTCTCTATGATATCCAAAAATGACAAGCAGTTTTGACA  
>HPV8\_Beta\_333074\_nt355\_E6\_AOS\_rc|1  
ACGACAACACGCAGTAACAACGTAATTTTTCCAAATTAGGCACAGTCTCTTTTTGTCAAA  
>HPV8\_Beta\_333074\_nt348\_E6\_AOS\_rc|1  
CACGCAGTAACAACGTAATTTTTCCAAATTAGGCACAGTCTCTTTTTGTCAAACACAC  
>HPV51\_Alpha\_333087\_nt490\_E6\_AOS\_rc|1  
CACTTGGGTTTCGTTACGTTGTGCGGTACGTTGCCAGCAATTAGCGCATTGCCCCGTCCA  
>HPV51\_Alpha\_333087\_nt149\_E6\_AOS\_rc|1  
ATAATTCCTTTTTACAATACACACACTACCTGTATATTGTGCATAGAAACGTTCAAAG  
>HPV20\_Beta\_1020162\_nt210\_E6\_AOS\_rc|1  
GAGGTTTTGCCTCTCCAATATTAGATGGTCCTTCATCAGCGCTGTCTTCTGAAGAAGGAG  
>HPV20\_Beta\_1020162\_nt296\_E6\_AOS\_rc|1  
ACAAGGTATCAAACAATCATCTAGCGGTATTTCTAAAAGTTTTGCTAGGCCACAGATTGT  
>HPV20\_Beta\_1020162\_nt289\_E6\_AOS\_rc|1  
ATCAAACAATCATCTAGCGGTATTTCTAAAAGTTTTGCTAGGCCACAGATTGTTGCAGGC  
>HPV20\_Beta\_1020162\_nt203\_E6\_AOS\_rc|1  
TGCCTCTCCAATATTAGATGGTCCTTCATCAGCGCTGTCTTCTGAAGAAGGAGGTGTAGC  
>HPV21\_Beta\_1020170\_nt284\_E6\_AOS\_rc|1  
CAATGGTATCTCTAACAGATTGGCTAGGTCACGAATTGTAGCTGGTAATGGTGGCTCTAA  
>HPV21\_Beta\_1020170\_nt277\_E6\_AOS\_rc|1  
ATCTCTAACAGATTGGCTAGGTCACGAATTGTAGCTGGTAATGGTGGCTCTAAAAGCTA  
>HPV22\_Beta\_1020178\_nt480\_E6\_AOS\_rc|1  
ACTTCAAGCAATATTGACATCTCATATAAATTTGGCCTACAGGTCGTTGTTCTTCTTGCT  
>HPV22\_Beta\_1020178\_nt302\_E6\_AOS\_rc|1  
CAAATCTTATAATCAAATTGCCGCAATTCCAAATAGGTTAAAAACCTACTGCAGAATCT  
>HPV22\_Beta\_1020178\_nt286\_E6\_AOS\_rc|1  
AATTGCCGCAATTCCAAATAGGTTAAAAACCTACTGCAGAATCTACAAGGTAGCAAAAAGA  
>HPV22\_Beta\_1020178\_nt277\_E6\_AOS\_rc|1  
AATTCCAAATAGGTTAAAAACCTACTGCAGAATCTACAAGGTAGCAAAAAGATCTACTACA  
>HPV23\_Beta\_1020186\_nt463\_E6\_AOS\_rc|1  
CGTTGCTCCTCTGCTCAATTTACGACCATACACAGTTAGCTGATAAAATTGTTGAATT  
>HPV23\_Beta\_1020186\_nt444\_E6\_AOS\_rc|1

TTTCACGACCATACACAGTTAGCTGATAAAATTGTTGAATTTCAAATTGAGCAGAAGCAT  
>HPV23\_Beta\_1020186\_nt346\_E6\_AOS\_rc|1  
TCTGTCCAGATTAACTGCAAATGTTTATAATCAAATTCTCGCAACTCTAAATAGGTAAGA  
>HPV23\_Beta\_1020186\_nt339\_E6\_AOS\_rc|1  
AGATTAAGTAACTGCAAATGTTTATAATCAAATTCTCGCAACTCTAAATAGGTAAGAAACCTAG  
>HPV23\_Beta\_1020186\_nt332\_E6\_AOS\_rc|1  
CTGCAAATGTTTATAATCAAATTCTCGCAACTCTAAATAGGTAAGAAACCTAGAACAAAA  
>HPV28\_Alpha\_1020202\_nt153\_E6\_AOS\_rc|1  
CGCTGTGGTCAGCACTTTGGCGCAGAATATGCAGTGCAAACGGAGGTCATCAAATGATAT  
>HPV28\_Alpha\_1020202\_nt190\_E6\_AOS\_rc|1  
CCACATTTAGTTCTCTTAATGCAAATGCTGATAGCTCCGCTGTGGTCAGCACTTTGGCGC  
>HPV28\_Alpha\_1020202\_nt172\_E6\_AOS\_rc|1  
ATGCAAATGCTGATAGCTCCGCTGTGGTCAGCACTTTGGCGCAGAATATGCAGTGCAAAC  
>HPV28\_Alpha\_1020202\_nt165\_E6\_AOS\_rc|1  
TGCTGATAGCTCCGCTGTGGTCAGCACTTTGGCGCAGAATATGCAGTGCAAACGGAGGTC  
>HPV28\_Alpha\_1020202\_nt144\_E6\_AOS\_rc|1  
CAGCACTTTGGCGCAGAATATGCAGTGCAAACGGAGGTCATCAAATGATATTCCACTGTC  
>HPV29\_Alpha\_1020210\_nt158\_E6\_AOS\_rc|1  
GGGCTGGTTAGCTCTTTTCGTGCAGAAAACACACTGTAGGCGAAGGTCCTCAAATGGTACT  
>HPV29\_Alpha\_1020210\_nt280\_E6\_AOS\_rc|1  
ACTGCCAGTATTTTAGGCGCCGCTTTATGCCCTTCAAACAATAAGCAGCGTGCACATGCAC  
>HPV29\_Alpha\_1020210\_nt261\_E6\_AOS\_rc|1  
CCGCTTTATGCCCTTCAAACAATAAGCAGCGTGCACATGCACCGTACGGAGCTCCACTTTT  
>HPV29\_Alpha\_1020210\_nt191\_E6\_AOS\_rc|1  
TTTAATTCCCGAATGCAAATGCTGCCAGTTCTGGGCTGGTTAGCTCTTTTCGTGCAGAAA  
>HPV29\_Alpha\_1020210\_nt184\_E6\_AOS\_rc|1  
CCCGAATGCAAATGCTGCCAGTTCTGGGCTGGTTAGCTCTTTTCGTGCAGAAAACACACT  
>HPV36\_Beta\_1020218\_nt480\_E6\_AOS\_rc|1  
ACCTAATGTCAATTTCAAATATGGAGCGACCTGCAGCCAATTCAATATCTCTTCCTAATA  
>HPV36\_Beta\_1020218\_nt207\_E6\_AOS\_rc|1  
TAGTTAAAGGCAGCTGTTCTTTTTCTTTTCTGTAAATATTCTGCTGTTTCGGAGGCTTGCT  
>HPV36\_Beta\_1020218\_nt200\_E6\_AOS\_rc|1  
AGGCAGCTGTTCTTTTTCTTTTCTGTAAATATTCTGCTGTTTCGGAGGCTTGCTCTGCCAT  
>HPV37\_Beta\_1020226\_nt308\_E6\_AOS\_rc|1  
TAAATCTTCTTCGGTCCAAATTAGTTGAAGACCTTTTCGATCAAATGCGATCAATTCTAT  
>HPV37\_Beta\_1020226\_nt301\_E6\_AOS\_rc|2  
TCTTCGGTCCAAATTAGTTGAAGACCTTTTCGATCAAATGCGATCAATTCTATATATGCT  
>HPV38\_Beta\_1020234\_nt441\_E6\_AOS\_rc|1  
ACCTTATAACAATAAGGCCTATTGTCTGTTGCTCCACCTGTTCAATTTACGGCCAAAGA  
>HPV38\_Beta\_1020234\_nt434\_E6\_AOS\_rc|1  
AACAAATAAGGCCTATTGTCTGTTGCTCCACCTGTTCAATTTACGGCCAAAGACAGTTAA  
>HPV38\_Beta\_1020234\_nt423\_E6\_AOS\_rc|1  
CTATTGTCTGTTGCTCCACCTGTTCAATTTACGGCCAAAGACAGTTAATTCATAAAACT  
>HPV38\_Beta\_1020234\_nt228\_E6\_AOS\_rc|1  
AGAATCTACAGGGTAATAACAGATCCTCTACAGGAAGTGAATTAATCACTGAGCTGCT  
>HPV44\_Alpha\_1020242\_nt363\_E6\_AOS\_rc|1  
CAAATAGCAGCGTATCAGCACGTCCAGAATTGACTTATTTGTTTCTTCTTCCACTGTTAC  
>HPV44\_Alpha\_1020242\_nt378\_E6\_AOS\_rc|1  
CAATGGGTTTGTGGCACAAATAGCAGCGTATCAGCACGTCCAGAATTGACTTATTTGTTTC  
>HPV44\_Alpha\_1020242\_nt371\_E6\_AOS\_rc|1  
TTGTGGCACAAATAGCAGCGTATCAGCACGTCCAGAATTGACTTATTTGTTTCTTCTTCC  
>HPV44\_Alpha\_1020242\_nt356\_E6\_AOS\_rc|1  
CAGCGTATCAGCACGTCCAGAATTGACTTATTTGTTTCTTCTTCCACTGTTACTGCATAT  
>HPV44\_Alpha\_1020242\_nt338\_E6\_AOS\_rc|1  
AGAATTGACTTATTTGTTTCTTCTTCCACTGTTACTGCATATCCCGCGTAGTTAAAATGC

>HPV55\_Alpha\_1020266\_nt376\_E6\_AOS\_rc|1  
ACAATGGTTTGTGGCACAAATAACAGCGTATGAACACGTCCAAAATTGACTGCTTTGTCT  
>HPV66\_Alpha\_1020290\_nt229\_E6\_AOS\_rc|1  
ATGGCCAATTGTTTCTATATACTAGTTTAACTCAATACATGCAAACCTATATAGCTCTA  
>HPV66\_Alpha\_1020290\_nt222\_E6\_AOS\_rc|1  
ATTGTTTCTATATACTAGTTTAACTCAATACATGCAAACCTATATAGCTCTAAACTTGT  
>HPV66\_Alpha\_1020290\_nt215\_E6\_AOS\_rc|1  
CTATATACTAGTTTAACTCAATACATGCAAACCTATATAGCTCTAAACTTGTAAGTTCC  
>HPV66\_Alpha\_1020290\_nt208\_E6\_AOS\_rc|1  
CTAGTTTAACTCAATACATGCAAACCTATATAGCTCTAAACTTGTAAGTTCCTTTTTGC  
>HPV70\_Alpha\_1173493\_nt330\_E6\_AOS\_rc|1  
TAGTTATGCTTTCCAAAGTTGTTGCATACACCGAGTTCGAATAATGCCGTAGTTCCTTA  
>HPV70\_Alpha\_1173493\_nt342\_E6\_AOS\_rc|1  
ATAACTTGGTATTAGTTATGCTTTCCAAAGTTGTTGCATACACCGAGTTCGAATAATGCC  
>HPV70\_Alpha\_1173493\_nt263\_E6\_AOS\_rc|1  
ATGAAATTTAATACATTTTGGCATGCAGCATATGGCTCCCCGTTTCTATATACTATAAA  
>HPV70\_Alpha\_1173493\_nt174\_E6\_AOS\_rc|1  
CTGTTTGCTGTAGCTGTGTTTACAATAGACACAGTCTATTGTAATGTCGTGCAATGTAG  
>HPV71\_Alpha\_12084981\_nt93\_E6\_AOS\_rc|1  
GGTGGGGTATGCGTCCCCGCTGGACATAGCTAAATCTGCTGAACCAAGCATTGCTTTATA  
>HPV71\_Alpha\_12084981\_nt86\_E6\_AOS\_rc|1  
TATGCGTCCCCGCTGGACATAGCTAAATCTGCTGAACCAAGCATTGCTTTATATATGCAC  
>HPV84\_Alpha\_12958167\_nt141\_E6\_AOS\_rc|2  
CATAAGCATTTTCATGCACACCCCATGAGGGAAATTATACCTCCAAACAATTAGTAATTCC  
>HPV84\_Alpha\_12958167\_nt151\_E6\_AOS\_rc|1  
GGCTTCCCTGCATAAGCATTTTCATGCACACCCCATGAGGGAAATTATACCTCCAAACAAT  
>HPV84\_Alpha\_12958167\_nt134\_E6\_AOS\_rc|1  
ATTTTCATGCACACCCCATGAGGGAAATTATACCTCCAAACAATTAGTAATTCCTTTACTG  
>HPV107\_Beta\_126131393\_nt531\_E6\_AOS\_rc|1  
ACACATCTAATATTAATAAATCCAATACTTTGCTGAGTGATCTCCTCAATCTGCTTACCT  
>HPV107\_Beta\_126131393\_nt421\_E6\_AOS\_rc|2  
AGCACAGCTGCAACAACAACCATATACTAAATTTTCATGCCAAATTAATTGTAAATTTTT  
>HPVcand87\_Alpha\_14475578\_nt253\_E6\_AOS\_rc|1  
CTTCTCTGAATAGGCATTGTAGGCACACTCCATAAGGAAATCCAAATCTCCACACCAGCA  
>HPVcand87\_Alpha\_14475578\_nt420\_E6\_AOS\_rc|1  
GTGGAAGTGCAGATTGCGGTGTATCATATGCTCCTTCTCGGGCCAGCACAATGGTTTGCA  
>HPVcand87\_Alpha\_14475578\_nt246\_E6\_AOS\_rc|1  
GAATAGGCATTGTAGGCACACTCCATAAGGAAATCCAAATCTCCACACCAGCAATAATTC  
>HPVcand87\_Alpha\_14475578\_nt239\_E6\_AOS\_rc|1  
CATTGTAGGCACACTCCATAAGGAAATCCAAATCTCCACACCAGCAATAATTCCTTAAT  
>HPVcand87\_Alpha\_14475578\_nt124\_E6\_AOS\_rc|1  
GCCTTAAGTTGTCAAAGTCCACCTCATATTCCTGACATAGCAAAAAGATATTGGTAGGTG  
>HPVcand87\_Alpha\_14475578\_nt92\_E6\_AOS\_rc|1  
TGACATAGCAAAAAGATATTGGTAGGTGTGTAGCGTCCGTTGGGCATGACTGTCCCGTTG  
>HPV72\_Alpha\_1491683\_nt438\_E6\_AOS\_rc|1  
CGTCCACAGTCCGCTTATCTTGTGGAAGTGGAATTCCTGTCTGCACCTGATATTCCTTTTC  
>HPV72\_Alpha\_1491683\_nt431\_E6\_AOS\_rc|1  
AGTCCGCTTATCTTGTGGAAGTGGAATTCCTGTCTGCACCTGATATTCCTTTTCCTGACAG  
>HPV72\_Alpha\_1491683\_nt424\_E6\_AOS\_rc|1  
TTATCTTGTGGAAGTGGAATTCCTGTCTGCACCTGATATTCCTTTTCCTGACAGCTTAGGG  
>HPV72\_Alpha\_1491683\_nt416\_E6\_AOS\_rc|1  
TGGAAGTGGAATTCCTGTCTGCACCTGATATTCCTTTTCCTGACAGCTTAGGGGTTTGCAG  
>HPV72\_Alpha\_1491683\_nt324\_E6\_AOS\_rc|1  
TGATTTGCCTGTTTCCTGTTCCACAGTGGGTCCGTAGCCCGAATACGTCCAGTATCGTAG  
>HPV72\_Alpha\_1491683\_nt137\_E6\_AOS\_rc|1

CAAAATATGCAGGTAATCCGTAAATCTTCTAGGTCCACCTCAATTTTCCTGCACAGCAAC  
>HPV73\_Alpha\_1491692\_nt143\_E6\_AOS\_rc|1  
CAAACACACAGTCCAGGTTTATATCATGTATAGAAATATTCACTTCGTACATAACGCT  
>HPV73\_Alpha\_1491692\_nt325\_E6\_AOS\_rc|1  
TGTTAGTTAAATTTTCTAACGTAGTGCCATATACTGATTGTCTATATCGCCTATACTCTC  
>HPV73\_Alpha\_1491692\_nt316\_E6\_AOS\_rc|1  
AATTTTCTAACGTAGTGCCATATACTGATTGTCTATATCGCCTATACTCTCTAATTTTAG  
>HPV73\_Alpha\_1491692\_nt136\_E6\_AOS\_rc|1  
CACAGTCCAGGTTTATATCATGTATAGAAATATTCACTTCGTACATAACGCTTGTAGCT  
>HPV73\_Alpha\_1491692\_nt129\_E6\_AOS\_rc|1  
CAGGTTTATATCATGTATAGAAATATTCACTTCGTACATAACGCTTGTAGCTTGTATGG  
>HPVcand86\_Alpha\_15741127\_nt149\_E6\_AOS\_rc|1  
CTTCTCTGCATATGCATTTTAGGCACACGCCATGAGGAAATCCGTGTTTCCAGACCAGTA  
>HPVcand86\_Alpha\_15741127\_nt142\_E6\_AOS\_rc|1  
GCATATGCATTTTAGGCACACGCCATGAGGAAATCCGTGTTTCCAGACCAGTAATAATTC  
>HPVcand86\_Alpha\_15741127\_nt135\_E6\_AOS\_rc|1  
CATTTTAGGCACACGCCATGAGGAAATCCGTGTTTCCAGACCAGTAATAATTCCTTTAGT  
>HPV88\_Gamma\_167600365\_nt342\_E6\_AOS\_rc|1  
ATGACATACATTCATAGCATCGGCATACCACATCAGCTAGATTCTTTCTTAGGAAATCCT  
>HPV88\_Gamma\_167600365\_nt353\_E6\_AOS\_rc|1  
TAAATCAAGCAATGACATACATTCATAGCATCGGCATACCACATCAGCTAGATTCTTTCT  
>HPV88\_Gamma\_167600365\_nt287\_E6\_AOS\_rc|1  
ATCCTCAAAATGAATTCCTTTACAGAGCAGCGGTAAAAGCGTTCAGCCTCATACCTAGC  
>HPV88\_Gamma\_167600365\_nt280\_E6\_AOS\_rc|1  
AAATGAATTCCTTTACAGAGCAGCGGTAAAAGCGTTCAGCCTCATACCTAGCAGAAAGC  
>HPV88\_Gamma\_167600365\_nt273\_E6\_AOS\_rc|1  
TTCCCTTTACAGAGCAGCGGTAAAAGCGTTCAGCCTCATACCTAGCAGAAAGCCTAGAAC  
>HPV88\_Gamma\_167600365\_nt266\_E6\_AOS\_rc|1  
TACAGAGCAGCGGTAAAAGCGTTCAGCCTCATACCTAGCAGAAAGCCTAGAACAAGGGAC  
>HPV88\_Gamma\_167600365\_nt259\_E6\_AOS\_rc|1  
CAGCGGTAAAAGCGTTCAGCCTCATACCTAGCAGAAAGCCTAGAACAAGGGACACAACAC  
>HPV88\_Gamma\_167600365\_nt252\_E6\_AOS\_rc|1  
AAAAGCGTTCAGCCTCATACCTAGCAGAAAGCCTAGAACAAGGGACACAACACGCAAAAC  
>HPV88\_Gamma\_167600365\_nt106\_E6\_AOS\_rc|1  
CAAGGAAGATGCACATCAAAAAGAGAAATATTAAAAATCGAACAGAAGTCATCTAGCCGT  
>HPV88\_Gamma\_167600365\_nt93\_E6\_AOS\_rc|1  
CATCAAAAAGAGAAATATTAAAAATCGAACAGAAGTCATCTAGCCGTTTTGGTAGATAAG  
>HPV110\_Beta\_186461194\_nt239\_E6\_AOS\_rc|1  
CAAACCTAATAATTCTATATATGATAAAAACCTAGTACAAAATCTACACGGTATTAATA  
>HPV110\_Beta\_186461194\_nt225\_E6\_AOS\_rc|1  
TCTATATATGATAAAAACCTAGTACAAAATCTACACGGTATTAATATGTCTAAAACAGGA  
>HPV110\_Beta\_186461194\_nt218\_E6\_AOS\_rc|1  
ATGATAAAAACCTAGTACAAAATCTACACGGTATTAATATGTCTAAAACAGGAATGCATA  
>HPV110\_Beta\_186461194\_nt208\_E6\_AOS\_rc|1  
CCTAGTACAAAATCTACACGGTATTAATATGTCTAAAACAGGAATGCATAATGTATCTGC  
>HPV111\_Beta\_186461202\_nt463\_E6\_AOS\_rc|1  
AATATTGTTGTTTGTAGCACACTCCTAGCTTCTCTACCAGATCCAATTTTTTCAAACAAT  
>HPV111\_Beta\_186461202\_nt470\_E6\_AOS\_rc|1  
CTATGAAAATATTGTTGTTTGTAGCACACTCCTAGCTTCTCTACCAGATCCAATTTTTTTC  
>HPV111\_Beta\_186461202\_nt379\_E6\_AOS\_rc|1  
CAATAGGCTGGTTTGCTACAGTTTCTATCTGTTTTCTACAACAGAGTATTCAAATATT  
>HPVFA75/KI88-03\_Unclassified\_206902429\_nt411\_E6\_AOS\_rc|1  
CTTTAAACAATAAATGCATCTGATAGTAATAAAGCCTACAGACTGTTGAGTCACCTGCTC  
>HPVFA75/KI88-03\_Unclassified\_206902429\_nt426\_E6\_AOS\_rc|1  
TAAAGGTCTAGATGCTTTAAACAATAAATGCATCTGATAGTAATAAAGCCTACAGACTG

>HPVFA75/KI88-03\_Unclassified\_206902429\_nt419\_E6\_AOS\_rc|1  
TCTAGATGCTTTAAACAATAAATGCATCTGATAGTAATAAAGCCTACAGACTGTTGAGTG  
>HPV91\_Alpha\_22023568\_nt81\_E6\_AOS\_rc|1  
ATGTACCGCTTTCGGTCGGACCGTTTTTCGGTTACTCCCTTTAGTACAAGCATAATAATTG  
>HPV91\_Alpha\_22023568\_nt94\_E6\_AOS\_rc|1  
GGGTGGTTTTATATATGTACCGCTTTCGGTCGGACCGTTTTTCGGTTACTCCCTTTAGTACA  
>HPV91\_Alpha\_22023568\_nt74\_E6\_AOS\_rc|1  
GCTTTCGGTCGGACCGTTTTTCGGTTACTCCCTTTAGTACAAGCATAATAATTGTTACTAA  
>HPV91\_Alpha\_22023568\_nt52\_E6\_AOS\_rc|1  
GTTACTCCCTTTAGTACAAGCATAATAATTGTTACTAATAACCACAAAGAATGTAAGGTG  
>HPV91\_Alpha\_22023568\_nt45\_E6\_AOS\_rc|1  
CCTTTAGTACAAGCATAATAATTGTTACTAATAACCACAAAGAATGTAAGGTGTGCAGCG  
>HPV91\_Alpha\_22023568\_nt38\_E6\_AOS\_rc|1  
TACAAGCATAATAATTGTTACTAATAACCACAAAGAATGTAAGGTGTGCAGCGACCGGTT  
>HPV91\_Alpha\_22023568\_nt31\_E6\_AOS\_rc|1  
ATAATAATTGTTACTAATAACCACAAAGAATGTAAGGTGTGCAGCGACCGGTTTCGGTCT  
>HPV91\_Alpha\_22023568\_nt24\_E6\_AOS\_rc|1  
TTGTTACTAATAACCACAAAGAATGTAAGGTGTGCAGCGACCGGTTTCGGTCTGCAGGTG  
>HPV91\_Alpha\_22023568\_nt17\_E6\_AOS\_rc|1  
TAATAACCACAAAGAATGTAAGGTGTGCAGCGACCGGTTTCGGTCTGCAGGTGTGCCTAA  
>HPV91\_Alpha\_22023568\_nt10\_E6\_AOS\_rc|1  
CACAAAGAATGTAAGGTGTGCAGCGACCGGTTTCGGTCTGCAGGTGTGCCTAACACAGTA  
>HPVcand89\_Alpha\_22095322\_nt66\_E6\_AOS\_rc|1  
GACAGCACTTCTGATGTTGTAAGCTCCTTGGTGCAATATATGCATGTAAGCCGTAGATCC  
>HPVcand89\_Alpha\_22095322\_nt59\_E6\_AOS\_rc|1  
CTTCTGATGTTGTAAGCTCCTTGGTGCAATATATGCATGTAAGCCGTAGATCCTCTAAAT  
>HPVcand89\_Alpha\_22095322\_nt52\_E6\_AOS\_rc|1  
TGTTGTAAGCTCCTTGGTGCAATATATGCATGTAAGCCGTAGATCCTCTAAATCCACGTC  
>HPV90\_Alpha\_22138122\_nt242\_E6\_AOS\_rc|1  
TAATAAGCAATTCTAAATAGGCACTCCTGTTTCATATTCCACTGTGGGTGCATAGCTAG  
>HPV90\_Alpha\_22138122\_nt267\_E6\_AOS\_rc|1  
AGTGGTTTATGGCACAGGTAGCATCTAATAAGCAATTCTAAATAGGCACTCCTGTTTCA  
>HPV90\_Alpha\_22138122\_nt235\_E6\_AOS\_rc|1  
CAATTCTAAATAGGCACTCCTGTTTCATATTCCACTGTGGGTGCATAGCTAGAATACTG  
>HPV90\_Alpha\_22138122\_nt183\_E6\_AOS\_rc|1  
GAATACTGCCAGTATCTAAATTGCCTTAGTTTCCCGGCTGCTTCCAGACACGCAGGACAT  
>HPV90\_Alpha\_22138122\_nt167\_E6\_AOS\_rc|1  
TAAATTGCCCTTAGTTTCCCGGCTGCTTCCAGACACGCAGGACATGCTGCAAATGGAAAAT  
>HPV90\_Alpha\_22138122\_nt160\_E6\_AOS\_rc|1  
CCTTAGTTTCCCGGCTGCTTCCAGACACGCAGGACATGCTGCAAATGGAAAATGCTTTCT  
>HPV58\_Alpha\_222386\_nt279\_E6\_AOS\_rc|1  
TATACTCACTTATTTTAGATAGCAATCGTAAGCACACTTTACATACTGCAAATGGATTTC  
>HPV58\_Alpha\_222386\_nt272\_E6\_AOS\_rc|1  
ACTTATTTTAGATAGCAATCGTAAGCACACTTTACATACTGCAAATGGATTTCATCTCT  
>HPV58\_Alpha\_222386\_nt265\_E6\_AOS\_rc|1  
TTAGATAGCAATCGTAAGCACACTTTACATACTGCAAATGGATTTCATCTCTATACACT  
>HPV58\_Alpha\_222386\_nt175\_E6\_AOS\_rc|1  
ACCTCAGATCGCTGCAAAGTCTTTTGCATTCAACGCATTTCAATTTCGATTTTCATGCACA  
>HPV58\_Alpha\_222386\_nt168\_E6\_AOS\_rc|1  
ATCGCTGCAAAGTCTTTTGCATTCAACGCATTTCAATTTCGATTTTCATGCACAGATGTCT  
>HPV58\_Alpha\_222386\_nt161\_E6\_AOS\_rc|1  
CAAAGTCTTTTGCATTCAACGCATTTCAATTTCGATTTTCATGCACAGATGTCTCCAACGC  
>HPV58\_Alpha\_222386\_nt154\_E6\_AOS\_rc|1  
TTTTTGCATTCAACGCATTTCAATTTCGATTTTCATGCACAGATGTCTCCAACGCCTGACAC  
>HPV58\_Alpha\_222386\_nt147\_E6\_AOS\_rc|1

ATTCAACGCATTTCAATTCGATTTTCATGCACAGATGTCTCCAACGCCTGACACAAATCAT  
>HPV74\_Alpha\_27462483\_nt350\_E6\_AOS\_rc|2  
AGCGCCCTTTCCAGGTGTCGCCTAGTTTAATAAATCTTGCCCTTTTCCAAAATGTGCCGTA  
>HPV92\_Beta\_27531786\_nt349\_E6\_AOS\_rc|1  
AAACTTACATCTAACAGTTAAACAACACAAAAGACTACCTGAGTCCCTTTCTATAGCATC  
>HPV92\_Beta\_27531786\_nt342\_E6\_AOS\_rc|1  
CATCTAACAGTTAAACAACACAAAAGACTACCTGAGTCCCTTTCTATAGCATCCTTTTCCT  
>HPV92\_Beta\_27531786\_nt112\_E6\_AOS\_rc|1  
TAAAATGTCCCTCCAATGGAATATCTAACTGTCTTCTAAGTTCCTGCACCGAAGGAGGTTT  
>HPV75\_Beta\_2911544\_nt470\_E6\_AOS\_rc|1  
TTTTTCAAATATATCCAAACGTTTCAGACAAAACCTGGCACCTTACAATAAGATTATGTAT  
>HPV75\_Beta\_2911544\_nt463\_E6\_AOS\_rc|1  
AATATATCCAAACGTTTCAGACAAAACCTGGCACCTTACAATAAGATTATGTATACTTTCT  
>HPV75\_Beta\_2911544\_nt456\_E6\_AOS\_rc|1  
CCAAACGTTTCAGACAAAACCTGGCACCTTACAATAAGATTATGTATACTTTCTGCTGCTC  
>HPV75\_Beta\_2911544\_nt449\_E6\_AOS\_rc|1  
TTTCAGACAAAACCTGGCACCTTACAATAAGATTATGTATACTTTCTGCTGCTCTGCCTTC  
>HPV75\_Beta\_2911544\_nt441\_E6\_AOS\_rc|1  
AAAACCTGGCACCTTACAATAAGATTATGTATACTTTCTGCTGCTCTGCCTTCTATTTCTA  
>HPV76\_Beta\_2911551\_nt474\_E6\_AOS\_rc|1  
CAAGTTTTTCAAATAAATCCAGGCGTTTCAAACAAAATTGACACCTTATTATAATGTTTCG  
>HPV76\_Beta\_2911551\_nt467\_E6\_AOS\_rc|1  
TTCAAATAAATCCAGGCGTTTCAAACAAAATTGACACCTTATTATAATGTTTCGCTATATT  
>HPV76\_Beta\_2911551\_nt460\_E6\_AOS\_rc|1  
AAATCCAGGCGTTTCAAACAAAATTGACACCTTATTATAATGTTTCGCTATATTTTTCTGCA  
>HPV76\_Beta\_2911551\_nt453\_E6\_AOS\_rc|1  
GGCGTTTCAAACAAAATTGACACCTTATTATAATGTTTCGCTATATTTTCTGCAGCTCTGC  
>HPV76\_Beta\_2911551\_nt446\_E6\_AOS\_rc|1  
CAAACAAAATTGACACCTTATTATAATGTTTCGCTATATTTTCTGCAGCTCTGCCTTCTAT  
>HPV77\_Alpha\_2911558\_nt161\_E6\_AOS\_rc|1  
TCAGCAGTAGTTAATTCCTTTGTGCAGAACACACACAGTAGGCGAAGGTCGTCGAACGGT  
>HPV77\_Alpha\_2911558\_nt300\_E6\_AOS\_rc|1  
GCCGTCCACGTAGTATGAATACTCCCAGTGTTTCAGGCGCCGCTCAATGCCATATAGCAG  
>HPV77\_Alpha\_2911558\_nt293\_E6\_AOS\_rc|1  
ACGTAGTATGAATACTCCCAGTGTTTCAGGCGCCGCTCAATGCCATATAGCAGTAAACAC  
>HPV77\_Alpha\_2911558\_nt198\_E6\_AOS\_rc|1  
CACCACATTTAATTCCTCTAATTGTAAATGCTGCCAGTTCAGCAGTAGTTAATTCCTTTTGT  
>HPV77\_Alpha\_2911558\_nt191\_E6\_AOS\_rc|1  
TTTAATTCCTCTAATTGTAAATGCTGCCAGTTCAGCAGTAGTTAATTCCTTTTGTGCAGAAC  
>HPV77\_Alpha\_2911558\_nt184\_E6\_AOS\_rc|1  
CTCTAATTGTAAATGCTGCCAGTTCAGCAGTAGTTAATTCCTTTTGTGCAGAACACACACA  
>HPV77\_Alpha\_2911558\_nt154\_E6\_AOS\_rc|1  
TAGTTAATTCCTTTTGTGCAGAACACACACAGTAGGCGAAGGTCGTCGAACGGTATTCAC  
>HPV80\_Beta\_2911565\_nt422\_E6\_AOS\_rc|1  
AACAGCTTTTCGCTCAACTACCTCAATCTCCCAACCACACACTGACTGTTCAATAAATGT  
>HPV80\_Beta\_2911565\_nt318\_E6\_AOS\_rc|1  
AAGCAAAGACAAAGTCTTCTTCAGTCCAAATCAACTGCAAACATTTGCGATCAAACTTA  
>HPV80\_Beta\_2911565\_nt311\_E6\_AOS\_rc|1  
GACAAAGTCTTCTTCAGTCCAAATCAACTGCAAACATTTGCGATCAAACTTACTAACTC  
>HPV80\_Beta\_2911565\_nt303\_E6\_AOS\_rc|1  
CTTCTTCAGTCCAAATCAACTGCAAACATTTGCGATCAAACTTACTAACTCTATATAAG  
>HPV80\_Beta\_2911565\_nt291\_E6\_AOS\_rc|1  
AAATCAACTGCAAACATTTGCGATCAAACTTACTAACTCTATATAAGTTAAAAATCTTT  
>HPV80\_Beta\_2911565\_nt282\_E6\_AOS\_rc|1  
GCAAACATTTGCGATCAAACTTACTAACTCTATATAAGTTAAAAATCTTTGACAAAACC



>HPVRTRX7\_Unclassified\_30315616\_nt530\_E6\_AOS\_rc|1  
CTATCTAATTTTTCAATGGTGCTCAAAAATGATAAGCAAGTCTGACACCTGATTTTCAAT  
>HPVRTRX7\_Unclassified\_30315616\_nt435\_E6\_AOS\_rc|1  
TCTACCTAAACTGTTTGCTGGTAATATTCATTGAATTCGAAAGTTGCAGTAGCTACACA  
>HPVRTRX7\_Unclassified\_30315616\_nt428\_E6\_AOS\_rc|1  
AAACTGTTTGCTGGTAATATTCATTGAATTCGAAAGTTGCAGTAGCTACACAACAACTT  
>HPV65\_Gamma\_312100\_nt417\_E6\_AOS\_rc|1  
TATTAAGTAGCAGGCCTGGTCAGAGTACAGCAAGTCTAATTTCTCAACAATGTCTAGTAG  
>HPV65\_Gamma\_312100\_nt410\_E6\_AOS\_rc|1  
TAGCAGGCCTGGTCAGAGTACAGCAAGTCTAATTTCTCAACAATGTCTAGTAGTCTCAAA  
>HPV65\_Gamma\_312100\_nt403\_E6\_AOS\_rc|1  
CCTGGTCAGAGTACAGCAAGTCTAATTTCTCAACAATGTCTAGTAGTCTCAAACAACATA  
>HPV65\_Gamma\_312100\_nt396\_E6\_AOS\_rc|1  
AGAGTACAGCAAGTCTAATTTCTCAACAATGTCTAGTAGTCTCAAACAACATATACATCT  
>HPV65\_Gamma\_312100\_nt389\_E6\_AOS\_rc|1  
AGCAAGTCTAATTTCTCAACAATGTCTAGTAGTCTCAAACAACATATACATCTGATGCAA  
>HPV65\_Gamma\_312100\_nt382\_E6\_AOS\_rc|1  
CTAATTTCTCAACAATGTCTAGTAGTCTCAAACAACATATACATCTGATGCAAATCTCCT  
>HPV65\_Gamma\_312100\_nt375\_E6\_AOS\_rc|1  
CTCAACAATGTCTAGTAGTCTCAAACAACATATACATCTGATGCAAATCTCCTTAATTTT  
>HPV65\_Gamma\_312100\_nt368\_E6\_AOS\_rc|1  
ATGTCTAGTAGTCTCAAACAACATATACATCTGATGCAAATCTCCTTAATTTTCCTTTGA  
>HPV11\_Alpha\_333026\_nt452\_E6\_AOS\_rc|1  
CAACGACCCCTCCACTGGTTATTTAGTTTTATGAAGCGTGCCTTTCCCAATATGTGCTTT  
>HPV11\_Alpha\_333026\_nt445\_E6\_AOS\_rc|1  
CCTTCCACTGGTTATTTAGTTTTATGAAGCGTGCCTTTCCCAATATGTGCTTTAGTTTTT  
>HPV11\_Alpha\_333026\_nt438\_E6\_AOS\_rc|1  
CTGGTTATTTAGTTTTATGAAGCGTGCCTTTCCCAATATGTGCTTTAGTTTTCTATTTT  
>HPV11\_Alpha\_333026\_nt431\_E6\_AOS\_rc|1  
TTTAGTTTTATGAAGCGTGCCTTTCCCAATATGTGCTTTAGTTTTCTATTTACACAAC  
>HPV11\_Alpha\_333026\_nt373\_E6\_AOS\_rc|1  
ACGGCTTGACACAGGTAACAACGAATTAACACTTTTAAAATATCTTCATTGGTTTCTT  
>HPV11\_Alpha\_333026\_nt295\_E6\_AOS\_rc|1  
ATGCAGCATAATTAAAGTGTCTATATTGGTTAATTTTCCCTTGCAGTTCTAAGCAACAGG  
>HPV31\_Alpha\_333048\_nt146\_E6\_AOS\_rc|1  
CAGTAGACACAATTCAATCTTAGTTCATCGTAGGGTATTTCCAATGCCGAGCTTAGTTCA  
>HPV31\_Alpha\_333048\_nt267\_E6\_AOS\_rc|1  
TACTTTTGAATAAAATCTTAAACATTTTGTACACACTCCGTGTGGTGTGTCGTCCTATA  
>HPV31\_Alpha\_333048\_nt139\_E6\_AOS\_rc|1  
CACAATTCATCTTAGTTCATCGTAGGGTATTTCCAATGCCGAGCTTAGTTCATGCAATT  
>HPV31\_Alpha\_333048\_nt132\_E6\_AOS\_rc|1  
CAATCTTAGTTCATCGTAGGGTATTTCCAATGCCGAGCTTAGTTCATGCAATTTCCGAGG  
>HPV31\_Alpha\_333048\_nt125\_E6\_AOS\_rc|1  
AGTTCATCGTAGGGTATTTCCAATGCCGAGCTTAGTTCATGCAATTTCCGAGGTCTTTCT  
>HPV31\_Alpha\_333048\_nt118\_E6\_AOS\_rc|1  
CGTAGGGTATTTCCAATGCCGAGCTTAGTTCATGCAATTTCCGAGGTCTTTCTGCAGGAT  
>HPV31\_Alpha\_333048\_nt111\_E6\_AOS\_rc|1  
TATTTCCAATGCCGAGCTTAGTTCATGCAATTTCCGAGGTCTTTCTGCAGGATTTTTGAA  
>HPV33\_Alpha\_333049\_nt300\_E6\_AOS\_rc|1  
TATACAGAATAATTATAATGTCTATATTCACTAATTTTAGATAAGAACCGCAAACACAGT  
>HPV33\_Alpha\_333049\_nt279\_E6\_AOS\_rc|1  
CTATATTCACATAATTTTAGATAAGAACCGCAAACACAGTTTACATATTCCAAATGGATTT  
>HPV33\_Alpha\_333049\_nt272\_E6\_AOS\_rc|1  
CACTAATTTTAGATAAGAACCGCAAACACAGTTTACATATTCCAAATGGATTTCCCTCTC  
>HPV33\_Alpha\_333049\_nt265\_E6\_AOS\_rc|1

TTTAGATAAGAACCGCAAACACAGTTTACATATTCCAAATGGATTTCCCTCTCTATATAC  
>HPV33\_Alpha\_333049\_nt258\_E6\_AOS\_rc|1  
AAGAACCGCAAACACAGTTTACATATTCCAAATGGATTTCCCTCTCTATATACAACTGTT  
>HPV33\_Alpha\_333049\_nt251\_E6\_AOS\_rc|1  
GCAAACACAGTTTACATATTCCAAATGGATTTCCCTCTCTATATACAACTGTTAAATCTG  
>HPV33\_Alpha\_333049\_nt174\_E6\_AOS\_rc|1  
ACCTCAGATCGTTGCAAAGGTTTTTTCATTCACGCACTGTAGTTCAATGTTGTGTATA  
>HPV33\_Alpha\_333049\_nt167\_E6\_AOS\_rc|1  
ATCGTTGCAAAGGTTTTTTCATTCACGCACTGTAGTTCAATGTTGTGTATAGTTGTCT  
>HPV33\_Alpha\_333049\_nt160\_E6\_AOS\_rc|1  
CAAAGGTTTTTTCATTCACGCACTGTAGTTCAATGTTGTGTATAGTTGTCTCCAATGC  
>HPV35\_Alpha\_333050\_nt466\_E6\_AOS\_rc|1  
CAGGACATACACCGACCTGTCCACCGTCCACCGATGTTATGGAATCGTTTTTTTCTTCT  
>HPV35\_Alpha\_333050\_nt445\_E6\_AOS\_rc|1  
CACCGTCCACCGATGTTATGGAATCGTTTTTTTCTTCTAAATGTCTTTGCTTTTCAACT  
>HPV35\_Alpha\_333050\_nt259\_E6\_AOS\_rc|1  
TAAATTTTAAACATTTTCATGCATACTCCATATGGCTGGCCTTCTCTATATACTATACAC  
>HPV35\_Alpha\_333050\_nt248\_E6\_AOS\_rc|1  
ACATTTTCATGCATACTCCATATGGCTGGCCTTCTCTATATACTATACACAAATCATAGCA  
>HPV35\_Alpha\_333050\_nt240\_E6\_AOS\_rc|1  
TGCATACTCCATATGGCTGGCCTTCTCTATATACTATACACAAATCATAGCATGCAAAGT  
>HPV47\_Beta\_333062\_nt243\_E6\_AOS\_rc|1  
GGTATGTCTAACAATTGAGCTAAGCCTCTAATAGTAGTAGGTAGTTCTAGCTTTTCCTCT  
>HPV47\_Beta\_333062\_nt251\_E6\_AOS\_rc|1  
CTACTAAAGGTATGTCTAACAATTGAGCTAAGCCTCTAATAGTAGTAGGTAGTTCTAGCT  
>HPV47\_Beta\_333062\_nt236\_E6\_AOS\_rc|1  
CTAACAATTGAGCTAAGCCTCTAATAGTAGTAGGTAGTTCTAGCTTTTCCTCTTTAACTG  
>HPV47\_Beta\_333062\_nt229\_E6\_AOS\_rc|1  
TTGAGCTAAGCCTCTAATAGTAGTAGGTAGTTCTAGCTTTTCCTCTTTAACTGTAGTCTG  
>HPV47\_Beta\_333062\_nt222\_E6\_AOS\_rc|1  
AAGCCTCTAATAGTAGTAGGTAGTTCTAGCTTTTCCTCTTTAACTGTAGTCTGTTCCAAA  
>HPV42\_Alpha\_333211\_nt456\_E6\_AOS\_rc|1  
CGTCCACTGACACAATATAAATTGAAATCTTGTACCTGTATCAATATGATGGTTTTTTTC  
>HPV42\_Alpha\_333211\_nt449\_E6\_AOS\_rc|1  
TGACACAATATAAATTGAAATCTTGTACCTGTATCAATATGATGGTTTTTTTCGCTCTGT  
>HPV42\_Alpha\_333211\_nt442\_E6\_AOS\_rc|1  
ATATAAATTGAAATCTTGTACCTGTATCAATATGATGGTTTTTTTCGCTCTGTGATAACG  
>HPV39\_Alpha\_333245\_nt174\_E6\_AOS\_rc|1  
CGGTTTGCTGTAGTGGTCGTCTGCAATAGACACAGGCTATTGTAATGTCCTGCAAGGTGG  
>HPV39\_Alpha\_333245\_nt162\_E6\_AOS\_rc|1  
GTGGTCGTCTGCAATAGACACAGGCTATTGTAATGTCCTGCAAGGTGGTGTCCAGCGTTG  
>HPV93\_Beta\_37089393\_nt376\_E6\_AOS\_rc|1  
GGCGACACCTCACTATAATTTTCAGAGAGTGGCTTTTTTTTCCTTAACTTCTATTGCCCAGC  
>HPV93\_Beta\_37089393\_nt369\_E6\_AOS\_rc|1  
CCTCACTATAATTTTCAGAGAGTGGCTTTTTTTTCCTTAACTTCTATTGCCCAGCCAACAAC  
>HPV93\_Beta\_37089393\_nt362\_E6\_AOS\_rc|1  
ATAATTTTCAGAGAGTGGCTTTTTTTTCCTTAACTTCTATTGCCCAGCCAACAACACTATCA  
>HPV93\_Beta\_37089393\_nt355\_E6\_AOS\_rc|1  
CAGAGAGTGGCTTTTTTTTCCTTAACTTCTATTGCCCAGCCAACAACACTATCATTCAAGT  
>HPV93\_Beta\_37089393\_nt348\_E6\_AOS\_rc|1  
TGGCTTTTTTTTCCTTAACTTCTATTGCCCAGCCAACAACACTATCATTCAAGTAATTATC  
>HPV12\_Beta\_396910\_nt614\_E6\_AOS\_rc|1  
TTACCGATCATTATTTCAGATACAAATGCTTGCACTGTCTGCAAATTCCTTCCACCTGTC  
>HPV12\_Beta\_396910\_nt607\_E6\_AOS\_rc|1  
TCATTATTTCAGATACAAATGCTTGCACTGTCTGCAAATTCCTTCCACCTGTCTCTAACC

>HPV12\_Beta\_396910\_nt474\_E6\_AOS\_rc|1  
ACCTTATCTTTAAGTCAAATATAGATTTTCCAGTAGCAAGCTCTATATCTCTACCTAGCA  
>HPV14D\_Beta\_396918\_nt260\_E6\_AOS\_rc|1  
CAAATATAGTTGCAGGTAATGGTGGCTCTATAAAAGAAGATTTGGTTTCTGTGCTATCAC  
>HPV14D\_Beta\_396918\_nt380\_E6\_AOS\_rc|1  
AAATTAGACTTAGTTTTTCTCATCAAATTCACAGACTTCTAAATGAGTCAAAAAATTAC  
>HPV14D\_Beta\_396918\_nt302\_E6\_AOS\_rc|1  
CTAAACAATCATCTAGTGGTATTTCCAATAGGTTTGCTAAGCCAAATATAGTTGCAGGTA  
>HPV14D\_Beta\_396918\_nt287\_E6\_AOS\_rc|1  
GTGGTATTTCCAATAGGTTTGCTAAGCCAAATATAGTTGCAGGTAATGGTGGCTCTATAA  
>HPV14D\_Beta\_396918\_nt280\_E6\_AOS\_rc|1  
TTCCAATAGGTTTGCTAAGCCAAATATAGTTGCAGGTAATGGTGGCTCTATAAAAGAAGA  
>HPV14D\_Beta\_396918\_nt246\_E6\_AOS\_rc|1  
GGTAATGGTGGCTCTATAAAAGAAGATTTGGTTTCTGTGCTATCACAATAGTTACTCTTA  
>HPV14D\_Beta\_396918\_nt239\_E6\_AOS\_rc|1  
GTGGCTCTATAAAAGAAGATTTGGTTTCTGTGCTATCACAATAGTTACTCTTAGGAGAAG  
>HPV15\_Beta\_396924\_nt436\_E6\_AOS\_rc|1  
ATAATAATATCTCCAACAGGCTTCTGTTCTACTATCTATTTCCCAACTACACACCGAC  
>HPV15\_Beta\_396924\_nt447\_E6\_AOS\_rc|1  
ATTTGCAGCGAATAATAATATCTCCAACAGGCTTCTGTTCTACTATCTCTATTTCCCAAC  
>HPV15\_Beta\_396924\_nt429\_E6\_AOS\_rc|1  
TATCTCCAACAGGCTTCTGTTCTACTATCTCTATTTCCCAACTACACACCGACTGTTTCAT  
>HPV15\_Beta\_396924\_nt422\_E6\_AOS\_rc|1  
AACAGGCTTCTGTTCTACTATCTCTATTTCCCAACTACACACCGACTGTTTCATAAAAGTT  
>HPV15\_Beta\_396924\_nt415\_E6\_AOS\_rc|1  
TTCTGTTCTACTATCTCTATTTCCCAACTACACACCGACTGTTTCATAAAAGTTAGAAAAT  
>HPV17\_Beta\_396932\_nt447\_E6\_AOS\_rc|1  
ACTTGCAGCGAATAGGTATTTCCCCTATTGGCTTGTGCTCTATTTCTCTAACTCCCTTC  
>HPV17\_Beta\_396932\_nt527\_E6\_AOS\_rc|1  
ATTGCGTCTAACCTTATGAACTGCTGATGTCTATAACAAGTGTCTAACTTCTCTAGTAA  
>HPV17\_Beta\_396932\_nt519\_E6\_AOS\_rc|1  
TAACCTTATGAACTGCTGATGTCTATAACAAGTGTCTAACTTCTCTAGTAAATCCAATT  
>HPV17\_Beta\_396932\_nt440\_E6\_AOS\_rc|2  
GCGAATAGGTATTTCCCCTATTGGCTTGTGCTCTATTTCTCTAACTCCCTTCCACTCAC  
>HPV17\_Beta\_396932\_nt432\_E6\_AOS\_rc|1  
GTATTTCCCCTATTGGCTTGTGCTCTATTTCTCTAACTCCCTTCCACTCACTGATTGTT  
>HPV17\_Beta\_396932\_nt422\_E6\_AOS\_rc|1  
TATTGGCTTGTGCTCTATTTCTCTAACTCCCTTCCACTCACTGATTGTTTCATAAACTT  
>HPV17\_Beta\_396932\_nt288\_E6\_AOS\_rc|1  
TTAACTGCAAACTTTTAAATCAAACGCCACCAATTCTATGTAAGCTAAAAACCTATTAC  
>HPV17\_Beta\_396932\_nt281\_E6\_AOS\_rc|2  
CAAACCTTTTAAATCAAACGCCACCAATTCTATGTAAGCTAAAAACCTATTACAAAATCT  
>HPV19\_Beta\_396940\_nt491\_E6\_AOS\_rc|1  
AAAGACAGATTTACCTGTTACAAACTCAATTTCTCTACCTGTTACAGTATGCTCATAGAA  
>HPV19\_Beta\_396940\_nt484\_E6\_AOS\_rc|1  
GATTTACCTGTTACAAACTCAATTTCTCTACCTGTTACAGTATGCTCATAGAACTCATTA  
>HPV19\_Beta\_396940\_nt474\_E6\_AOS\_rc|1  
TTACAAACTCAATTTCTCTACCTGTTACAGTATGCTCATAGAACTCATTAATTCAAATG  
>HPV19\_Beta\_396940\_nt361\_E6\_AOS\_rc|2  
CAAATCAAACCTAAGTCTTTTATCATCAAATTCGCACGCTTCTAAATGTGATAAAAACTTG  
>HPV19\_Beta\_396940\_nt354\_E6\_AOS\_rc|1  
AACTAAGTCTTTTATCATCAAATTCGCACGCTTCTAAATGTGATAAAAACTTGCCACAGA  
>HPV19\_Beta\_396940\_nt288\_E6\_AOS\_rc|1  
AAGGCACTAAACAGTCATCCAACGGTATTTCTAGCAATGCTGCTAATCCAGCAATTGTTG  
>HPV25\_Beta\_396948\_nt456\_E6\_AOS\_rc|1

CGTCTTCAATTTCCCTACCTGTTACAGTGCTTTTCGTAAAATTCATTAAATTCAAATGTGG  
>HPV25\_Beta\_396948\_nt469\_E6\_AOS\_rc|1  
GATTTACCTGTAACGTCTTCAATTTCCCTACCTGTTACAGTGCTTTTCGTAAAATTCATTA  
>HPV25\_Beta\_396948\_nt345\_E6\_AOS\_rc|1  
AAATCAAACCTAAGTCTTTTCTCATCAAACCTCACAGATCTCTAAATATGTTAGAAAGTTGC  
>HPV25\_Beta\_396948\_nt338\_E6\_AOS\_rc|1  
ACTAAGTCTTTTCTCATCAAACCTCACAGATCTCTAAATATGTTAGAAAGTTGCCACAGAA  
>HPV25\_Beta\_396948\_nt266\_E6\_AOS\_rc|1  
TAAGCAATCATCTAATGGAATTTCCAATAAAGCTGCTAGATCAGTAATTGTTGCTGGCAA  
>HPV25\_Beta\_396948\_nt259\_E6\_AOS\_rc|1  
TCATCTAATGGAATTTCCAATAAAGCTGCTAGATCAGTAATTGTTGCTGGCAATGGTGGC  
>HPV25\_Beta\_396948\_nt252\_E6\_AOS\_rc|1  
ATGGAATTTCCAATAAAGCTGCTAGATCAGTAATTGTTGCTGGCAATGGTGGCTGTATAA  
>HPV25\_Beta\_396948\_nt212\_E6\_AOS\_rc|1  
TGGCAATGGTGGCTGTATAACCTGCGCTTGCTCTGGTGGTCCTATGCTCTGTTTCAGCATT  
>HPV27\_Alpha\_396964\_nt213\_E6\_AOS\_rc|1  
CACTACAGACAGTTCTTTTATTGCAAATGCCAATACATCAGCGTCTGAAAGCGCTCGTCT  
>HPV27\_Alpha\_396964\_nt199\_E6\_AOS\_rc|1  
CTTTTATTGCAAATGCCAATACATCAGCGTCTGAAAGCGCTCGTCTGCAATACACGCAGA  
>HPV30\_Alpha\_396973\_nt133\_E6\_AOS\_rc|1  
GCTGTAGCTCCAGCAACGATGTTTCTTGACCTCACAAAGATGGTGCACAGTACGTGGGC  
>HPV30\_Alpha\_396973\_nt140\_E6\_AOS\_rc|1  
CACTGTAGCTGTAGCTCCAGCAACGATGTTTCTTGACCTCACAAAGATGGTGCACAGTA  
>HPV3\_Alpha\_397005\_nt164\_E6\_AOS\_rc|1  
GTCAGCTGTTTCGTACAGAATATGCAGTGCAGGCGAAGGTCGTCAAATCCTATTCGGTG  
>HPV3\_Alpha\_397005\_nt205\_E6\_AOS\_rc|1  
CATTCAGTTCCCGTAATGCAAATGCTTGTAGTTCAGTTGTAGTCAGCTGTTTCGTACAGA  
>HPV3\_Alpha\_397005\_nt196\_E6\_AOS\_rc|1  
CCCGTAATGCAAATGCTTGTAGTTCAGTTGTAGTCAGCTGTTTCGTACAGAATATGCAGT  
>HPV3\_Alpha\_397005\_nt189\_E6\_AOS\_rc|1  
TGCAAATGCTTGTAGTTCAGTTGTAGTCAGCTGTTTCGTACAGAATATGCAGTGCAGGCG  
>HPV3\_Alpha\_397005\_nt173\_E6\_AOS\_rc|1  
TCAGTTGTAGTCAGCTGTTTCGTACAGAATATGCAGTGCAGGCGAAGGTCGTCAAATCCT  
>HPV3\_Alpha\_397005\_nt148\_E6\_AOS\_rc|1  
AGAATATGCAGTGCAGGCGAAGGTCGTCAAATCCTATTCCGGTGTTTCTGCACAGTAGAA  
>HPV40\_Alpha\_397014\_nt310\_E6\_AOS\_rc|1  
CTTCCACGGTGGTGCATAGGCTGCGTATCTAAAGTTTCTGTATTGGTTTACTTTTCCGT  
>HPV40\_Alpha\_397014\_nt303\_E6\_AOS\_rc|1  
GGTTGGTGCATAGGCTGCGTATCTAAAGTTTCTGTATTGGTTTACTTTTCCGTGCAGGTC  
>HPV40\_Alpha\_397014\_nt296\_E6\_AOS\_rc|2  
GCATAGGCTGCGTATCTAAAGTTTCTGTATTGGTTTACTTTTCCGTGCAGGTCCAGGCAC  
>HPV40\_Alpha\_397014\_nt289\_E6\_AOS\_rc|1  
CTGCGTATCTAAAGTTTCTGTATTGGTTTACTTTTCCGTGCAGGTCCAGGCACCGTGGAC  
>HPV40\_Alpha\_397014\_nt282\_E6\_AOS\_rc|1  
TCTAAAGTTTCTGTATTGGTTTACTTTTCCGTGCAGGTCCAGGCACCGTGGACATGCGGC  
>HPV40\_Alpha\_397014\_nt275\_E6\_AOS\_rc|1  
TTTCTGTATTGGTTTACTTTTCCGTGCAGGTCCAGGCACCGTGGACATGCGGCGTGTGA  
>HPV45\_Alpha\_397022\_nt498\_E6\_AOS\_rc|1  
TCTGCGAAGTCTTCTTGCCGTGCGTGCACAAACATGTATTACACTGCCCTCGGTACTG  
>HPV52\_Alpha\_397038\_nt368\_E6\_AOS\_rc|1  
GGCGTTTGACAAATTATACATCTAATAGTTATTTCACTTAATGGTTTTTTTACCCTCTCT  
>HPV52\_Alpha\_397038\_nt361\_E6\_AOS\_rc|1  
GACAAATTATACATCTAATAGTTATTTCACTTAATGGTTTTTTTACCCTCTCTTCTAATG  
>HPV52\_Alpha\_397038\_nt354\_E6\_AOS\_rc|1  
TATACATCTAATAGTTATTTCACTTAATGGTTTTTTTACCCTCTCTTCTAATGTTTTCCC

>HPV52\_Alpha\_397038\_nt347\_E6\_AOS\_rc|1  
CTAATAGTTATTTACTTAATGGTTTTTTTACCCTCTCTTCTAATGTTTTCCCATACAGT  
>HPV52\_Alpha\_397038\_nt340\_E6\_AOS\_rc|1  
TTATTTTACTTAATGGTTTTTTTACCCTCTCTTCTAATGTTTTCCCATACAGTGAATATT  
>HPV52\_Alpha\_397038\_nt333\_E6\_AOS\_rc|1  
ACTTAATGGTTTTTTTACCCTCTCTTCTAATGTTTTCCCATACAGTGAATATTGATAATG  
>HPV52\_Alpha\_397038\_nt326\_E6\_AOS\_rc|1  
GGTTTTTTTTACCCTCTCTTCTAATGTTTTCCCATACAGTGAATATTGATAATGCCTATAT  
>HPV52\_Alpha\_397038\_nt319\_E6\_AOS\_rc|1  
TTACCCTCTCTTCTAATGTTTTCCCATACAGTGAATATTGATAATGCCTATATTTCACTTA  
>HPV52\_Alpha\_397038\_nt305\_E6\_AOS\_rc|1  
AATGTTTTCCCATACAGTGAATATTGATAATGCCTATATTTCACTTATCTTAGATAAAAAAG  
>HPV52\_Alpha\_397038\_nt298\_E6\_AOS\_rc|1  
TCCCATACAGTGAATATTGATAATGCCTATATTTCACTTATCTTAGATAAAAAAGCGTAGGC  
>HPV56\_Alpha\_397053\_nt268\_E6\_AOS\_rc|2  
CTTTACTATAAAACAATAAACAATACTCTGCACACTGCATAAGGAAAATCATCCCTATACA  
>HPV56\_Alpha\_397053\_nt261\_E6\_AOS\_rc|2  
ATAAAACAATAAACAATACTCTGCACACTGCATAAGGAAAATCATCCCTATACACTAATTT  
>HPVcand62\_Alpha\_39932599\_nt188\_E6\_AOS\_rc|1  
AGCATGAGTGTGCCACCGCGTAGCTCTCTTACTTTAATCTCTCTCAATAGGCATGCTG  
>HPVcand62\_Alpha\_39932599\_nt205\_E6\_AOS\_rc|1  
TTCTACTGTTATTCCAAAGCATGAGTGCTGCCACCGCGTAGCTCTCTTACTTTAATCTC  
>HPVcand62\_Alpha\_39932599\_nt198\_E6\_AOS\_rc|1  
GTTATTCCAAAGCATGAGTGCTGCCACCGCGTAGCTCTCTTACTTTAATCTCTCTCAAT  
>HPV43\_Alpha\_40804474\_nt304\_E6\_AOS\_rc|1  
TATCTGCATATGCTGCGTAGTCAAAGTGCCTATATTGACTTATTTTTCCATGAAACTGTA  
>HPV43\_Alpha\_40804474\_nt316\_E6\_AOS\_rc|1  
CTTCTTCTACAGTATCTGCATATGCTGCGTAGTCAAAGTGCCTATATTGACTTATTTTTTC  
>HPV43\_Alpha\_40804474\_nt297\_E6\_AOS\_rc|1  
ATATGCTGCGTAGTCAAAGTGCCTATATTGACTTATTTTTCCATGAAACTGTAGACAGGC  
>HPV43\_Alpha\_40804474\_nt290\_E6\_AOS\_rc|1  
GCGTAGTCAAAGTGCCTATATTGACTTATTTTTCCATGAAACTGTAGACAGGCCAAGCAT  
>HPV81\_Alpha\_40804509\_nt434\_E6\_AOS\_rc|1  
TGAAAGTGGATTAGGCCTGTCAAGATACTCCTTTTCTTGGTATGTTAACGGTTTATAG  
>HPV81\_Alpha\_40804509\_nt427\_E6\_AOS\_rc|1  
GGATTAGGCCTGTCACAAGATACTCCTTTTCTTGGTATGTTAACGGTTTATAGCATGCAT  
>HPV81\_Alpha\_40804509\_nt319\_E6\_AOS\_rc|1  
CTGTTGGTCCGAAGCACGAATATTGCCACCGCCGAGCTCCCGTACTTTAGCTTCTCTGC  
>HPV81\_Alpha\_40804509\_nt102\_E6\_AOS\_rc|1  
CAGCAAAAACAAATTGGTAGGATTTGCTGGCCCCAGCGACATCACTGCTGTGCTGACCAT  
>HPV95\_Gamma\_40804520\_nt360\_E6\_AOS\_rc|2  
ACAGCATAAACATCTTACACATATATCCCTGATTTTTTGTCTACTAAATCTTCCAGTCC  
>HPV95\_Gamma\_40804520\_nt390\_E6\_AOS\_rc|1  
AAGTTTTTCTACTATGTCTAATAGTTTAAGACAGCATAAACATCTTACACATATATCCCT  
>HPV95\_Gamma\_40804520\_nt383\_E6\_AOS\_rc|1  
TCTACTATGTCTAATAGTTTAAGACAGCATAAACATCTTACACATATATCCCTGATTTTT  
>HPV95\_Gamma\_40804520\_nt376\_E6\_AOS\_rc|1  
TGTCTAATAGTTTAAGACAGCATAAACATCTTACACATATATCCCTGATTTTTTGTCTTA  
>HPV95\_Gamma\_40804520\_nt369\_E6\_AOS\_rc|1  
TAGTTTAAGACAGCATAAACATCTTACACATATATCCCTGATTTTTTGTCTACTAAATC  
>HPV95\_Gamma\_40804520\_nt353\_E6\_AOS\_rc|1  
AAACATCTTACACATATATCCCTGATTTTTTGTCTACTAAATCTTCCAGTCCAGTAGCA  
>HPV95\_Gamma\_40804520\_nt346\_E6\_AOS\_rc|1  
TTACACATATATCCCTGATTTTTTGTCTACTAAATCTTCCAGTCCAGTAGCATATACAG  
>HPV94\_Alpha\_40804528\_nt175\_E6\_AOS\_rc|1

CTCTTAATGCAAATGCAGTCAATTCGGCTACGGTCAGCTGTTTGGTGCAGAACACGCAGC  
>HPV94\_Alpha\_40804528\_nt183\_E6\_AOS\_rc|1  
ATTCAATTCTCTTAATGCAAATGCAGTCAATTCGGCTACGGTCAGCTGTTTGGTGCAGAA  
>HPV94\_Alpha\_40804528\_nt138\_E6\_AOS\_rc|1  
CTGTTTGGTGCAGAACACGCAGCACAGGCGAAGGTCCTCAAATGATATTCCACAGTTCCT  
>HPV94\_Alpha\_40804528\_nt130\_E6\_AOS\_rc|1  
TGCAGAACACGCAGCACAGGCGAAGGTCCTCAAATGATATTCCACAGTTCCTACACAATA  
>HPVcand85\_Alpha\_4574720\_nt141\_E6\_AOS\_rc|2  
ACAGCTTATTTCTATATCTTGCAGTGATGTGTCCAGTGTGTTGCATAGGTCTGGTAGTTT  
>HPVcand85\_Alpha\_4574720\_nt404\_E6\_AOS\_rc|1  
TGTTTTAGTTTTTCTGCCGGACATAAAGGTTTTTGACACCGTAAACACCTTATTAATATA  
>HPVcand85\_Alpha\_4574720\_nt397\_E6\_AOS\_rc|1  
GTTTTTCTGCCGGACATAAAGGTTTTTGACACCGTAAACACCTTATTAATATATCATATA  
>HPVcand85\_Alpha\_4574720\_nt312\_E6\_AOS\_rc|1  
CGTTTCCCCATACACAGAGTCGCTATAATATCTTAGTTCTCTTATTTTGAATAAAACAT  
>HPVcand85\_Alpha\_4574720\_nt151\_E6\_AOS\_rc|1  
TACAATATACACAGCTTATTTCTATATCTTGCAGTGATGTGTCCAGTGTGTTGCATAGGT  
>HPV96\_Beta\_50253426\_nt260\_E6\_AOS\_rc|1  
AAATGTCCTAGAAACGCAGGCGGTTACTTGTTTATGAGTGGCAGGTTGTAATTGCCAACA  
>HPV96\_Beta\_50253426\_nt253\_E6\_AOS\_rc|1  
CTAGAAACGCAGGCGGTTACTTGTTTATGAGTGGCAGGTTGTAATTGCCAACAACCTCTC  
>HPV96\_Beta\_50253426\_nt225\_E6\_AOS\_rc|1  
GAGTGGCAGGTTGTAATTGCCAACAACCTCTCAAGATAAAACTTTTGGCAACCGAGAGAG  
>HPV96\_Beta\_50253426\_nt218\_E6\_AOS\_rc|1  
AGGTTGTAATTGCCAACAACCTCTCAAGATAAAACTTTTGGCAACCGAGAGAGTTGCGAA  
>HPV96\_Beta\_50253426\_nt210\_E6\_AOS\_rc|1  
ATTGCCAACAACCTCTCAAGATAAAACTTTTGGCAACCGAGAGAGTTGCGAAACTTACCG  
>HPV96\_Beta\_50253426\_nt141\_E6\_AOS\_rc|2  
CCAAAGTTGGCAGACGTTTTTGGCGGGCTTTTCTTGGCAGGTTTAAACTGCTTTTGGCAA  
>HPV96\_Beta\_50253426\_nt116\_E6\_AOS\_rc|1  
GCTTTTCTTGGCAGGTTTAAACTGCTTTTGGCAAAGCCACTGGATCGGTGTTGTTCCAGG  
>HPV96\_Beta\_50253426\_nt109\_E6\_AOS\_rc|1  
TTGGCAGGTTTAAACTGCTTTTGGCAAAGCCACTGGATCGGTGTTGTTCCAGGAGTGACT  
>HPV96\_Beta\_50253426\_nt102\_E6\_AOS\_rc|1  
GTTTAAACTGCTTTTGGCAAAGCCACTGGATCGGTGTTGTTCCAGGAGTGACTGCCAGGA  
>HPV96\_Beta\_50253426\_nt94\_E6\_AOS\_rc|1  
TGCTTTTGGCAAAGCCACTGGATCGGTGTTGTTCCAGGAGTGACTGCCAGGATCAGATAC  
>HPV83\_Alpha\_5059324\_nt192\_E6\_AOS\_rc|1  
GCCCCGTAGCTTGAGTGGCTCCAGTGCCGTAGCTCTCGCACCTTTGCTGCTTTACGTAGA  
>HPV83\_Alpha\_5059324\_nt257\_E6\_AOS\_rc|1  
TCAGGCACATATGGCATCGTATATACAGCTGTGCCAGTGGTGTGTTTTGTTTCTTCTCTTA  
>HPV83\_Alpha\_5059324\_nt250\_E6\_AOS\_rc|1  
CATATGGCATCGTATATACAGCTGTGCCAGTGGTGTGTTTTGTTTCTTCTTCTACTGTTGC  
>HPV83\_Alpha\_5059324\_nt185\_E6\_AOS\_rc|1  
AGCTTGAGTGGCTCCAGTGCCGTAGCTCTCGCACCTTTGCTGCTTTACGTAGACACTGTG  
>HPV83\_Alpha\_5059324\_nt178\_E6\_AOS\_rc|1  
GTGGCTCCAGTGCCGTAGCTCTCGCACCTTTGCTGCTTTACGTAGACACTGTGCACACGC  
>HPV59\_Alpha\_557236\_nt372\_E6\_AOS\_rc|1  
CTTCTTTTTTTCAGTTATATGCTTTAATTATCTGTTGGACATAGAGGTTTTAGGCATCTA  
>HPV59\_Alpha\_557236\_nt365\_E6\_AOS\_rc|1  
TTTCAGTTATATGCTTTAATTATCTGTTGGACATAGAGGTTTTAGGCATCTATAACAGC  
>HPV6\_Alpha\_6002612\_nt440\_E6\_AOS\_rc|1  
ACGTACAATTTAGCTTTATGAACCGTGCTTGGTTAGTATATGTTTTACCTTTTCTACTT  
>HPV57\_Alpha\_60882\_nt499\_E6\_AOS\_rc|1  
ATGTCCTCAAGGCTGGGGCGTTCTCCATGCATCTTGGCGCACAGTTCATGCAATGTCCGG

>HPV57\_Alpha\_60882\_nt506\_E6\_AOS\_rc|1  
TAGTGTGATGTCCCTCAAGGCTGGGGCGTTCTCCATGCATCTTGGCGCACAGTTCATGCAA  
>HPV57\_Alpha\_60882\_nt492\_E6\_AOS\_rc|1  
CAAGGCTGGGGCGTTCTCCATGCATCTTGGCGCACAGTTCATGCAATGTCCGGTCCACTG  
>HPV69\_Alpha\_6970418\_nt275\_E6\_AOS\_rc|1  
CGTCTATATTCTATTATTTTTGAATAGAATATTATACATTTTTTTACATGCACCATATGCA  
>HPV69\_Alpha\_6970418\_nt268\_E6\_AOS\_rc|1  
ATTCTATTATTTTTGAATAGAATATTATACATTTTTTTACATGCACCATATGCACTATCAT  
>HPV69\_Alpha\_6970418\_nt261\_E6\_AOS\_rc|2  
TATTTTTGAATAGAATATTATACATTTTTTTACATGCACCATATGCACTATCATTTCTATA  
>HPV69\_Alpha\_6970418\_nt254\_E6\_AOS\_rc|1  
GAATAGAATATTATACATTTTTTTACATGCACCATATGCACTATCATTTCTATACACTATT  
>HPV82\_Alpha\_6970427\_nt498\_E6\_AOS\_rc|1  
TTACACCTGGGTTTCACTACGTTGTCTTGGTGGTTTTCTGCAATTTGCACACTGTCCCGT  
>HPV82\_Alpha\_6970427\_nt491\_E6\_AOS\_rc|1  
TGGGTTTCACTACGTTGTCTTGGTGGTTTTCTGCAATTTGCACACTGTCCCGTCCAGCGT  
>HPV82\_Alpha\_6970427\_nt263\_E6\_AOS\_rc|1  
CTAATTCTAGAATAAAACATTAGGCATTTTTTGCATGCTGCATATGGCGTATTGTCCCTA  
>HPV82\_Alpha\_6970427\_nt249\_E6\_AOS\_rc|1  
AAACATTAGGCATTTTTTGCATGCTGCATATGGCGTATTGTCCCTATATACAATCCTAAG  
>HPV82\_Alpha\_6970427\_nt242\_E6\_AOS\_rc|1  
AGGCATTTTTTGCATGCTGCATATGGCGTATTGTCCCTATATACAATCCTAAGTTCTGTA  
>HPV82\_Alpha\_6970427\_nt154\_E6\_AOS\_rc|1  
ACAACCTCCTTTTTACAATATACACACAATACCTGAATATTGTGCATAGACGTATTGCAGG  
>HPV82\_Alpha\_6970427\_nt139\_E6\_AOS\_rc|1  
AATATACACACAATACCTGAATATTGTGCATAGACGTATTGCAGGCTTCACATAATTTCGT  
>HPV68a\_Alpha\_71726685\_nt103\_E6\_AOS\_rc|1  
TACACATAGGTCCTAAAGGCAAATTCATATACCTCTGTCCGTTGTAGTTGCCTTCTGCA  
>HPV97\_Alpha\_71726694\_nt342\_E6\_AOS\_rc|1  
TAATAACCAGATATGTGGTGGAATCGTCGTTTGTCTTTAAGATGTTTATATTTGTCTGCT  
>HPV97\_Alpha\_71726694\_nt352\_E6\_AOS\_rc|1  
CTGGCCTCTATAATAACCAGATATGTGGTGGAATCGTCGTTTGTCTTTAAGATGTTTATA  
>HPV97\_Alpha\_71726694\_nt335\_E6\_AOS\_rc|1  
CAGATATGTGGTGGAATCGTCGTTTGTCTTTAAGATGTTTATATTTGTCTGCTGGATTCA  
>HPV106\_Alpha\_71726710\_nt16\_E6\_AOS\_rc|1  
ATTCTTTGGACAGCAGTCTCCGTTGGTCATGGCTATTTTTGTGCTGAAGCAACATATCTCT  
>HPV106\_Alpha\_71726710\_nt286\_E6\_AOS\_rc|1  
AATAAACAGCTCTAGTATTGGTATCCCTGTTTCATACTCCACTGTGGGTGCATAGCTGGA  
>HPV106\_Alpha\_71726710\_nt279\_E6\_AOS\_rc|1  
AGCTCTAGTATTGGTATCCCTGTTTCATACTCCACTGTGGGTGCATAGCTGGAGTAGTCC  
>HPV106\_Alpha\_71726710\_nt243\_E6\_AOS\_rc|1  
GTGGGTGCATAGCTGGAGTAGTCCCAGTATCTAAATTGTCTAAGTTTTCCAGCTGCTTTC  
>HPV106\_Alpha\_71726710\_nt9\_E6\_AOS\_rc|1  
GGACAGCAGTCTCCGTTGGTCATGGCTATTTTTGTGCTGAAGCAACATATCTCTTTTATAT  
>HPV102\_Alpha\_71726718\_nt240\_E6\_AOS\_rc|1  
CTCATATACAGCTGTGGTAATGCTGTGCGGGTTTCTTCTTCAACCGTTGCGCCGTAGCTG  
>HPV102\_Alpha\_71726718\_nt233\_E6\_AOS\_rc|1  
ACAGCTGTGGTAATGCTGTGCGGGTTTCTTCTTCAACCGTTGCGCCGTAGCTGGAGTAGT  
>HPV102\_Alpha\_71726718\_nt226\_E6\_AOS\_rc|1  
TGGTAATGCTGTGCGGGTTTCTTCTTCAACCGTTGCGCCGTAGCTGGAGTAGTTCCAGTG  
>HPV102\_Alpha\_71726718\_nt215\_E6\_AOS\_rc|1  
TGCGGGTTTCTTCTTCAACCGTTGCGCCGTAGCTGGAGTAGTTCCAGTGCCGTAGTTCCC  
>HPV13\_Alpha\_85827580\_nt291\_E6\_AOS\_rc|1  
CGAAGTCAAAAATGCCTAAACTGGTTAATCTTTCCTTGTATTTCTAAGCAGCATGCACAAG  
>HPV13\_Alpha\_85827580\_nt284\_E6\_AOS\_rc|1

AAAATGCCTAAACTGGTTAATCTTTCTTGTATTTCTAAGCAGCATGCACAAGCCGCAAA  
>HPV13\_Alpha\_85827580\_nt277\_E6\_AOS\_rc|1  
CTAAACTGGTTAATCTTTCTTGTATTTCTAAGCAGCATGCACAAGCCGCAAAATGGAAAC  
>HPV13\_Alpha\_85827580\_nt270\_E6\_AOS\_rc|1  
GGTTAATCTTTCTTGTATTTCTAAGCAGCATGCACAAGCCGCAAAATGGAAACGATCCTC  
>HPV13\_Alpha\_85827580\_nt255\_E6\_AOS\_rc|1  
GTATTTCTAAGCAGCATGCACAAGCCGCAAAATGGAAACGATCCTCGCCACACTATATATA  
>HPV13\_Alpha\_85827580\_nt248\_E6\_AOS\_rc|1  
TAAGCAGCATGCACAAGCCGCAAAATGGAAACGATCCTCGCCACACTATATATAAACTCTT  
>HPV13\_Alpha\_85827580\_nt240\_E6\_AOS\_rc|1  
ATGCACAAGCCGCAAAATGGAAACGATCCTCGCCACACTATATATAAACTCTTATACTGAA  
>HPV13\_Alpha\_85827580\_nt220\_E6\_AOS\_rc|1  
AACGATCCTCGCCACACTATATATAAACTCTTATACTGAAATGAATAAACCTCTGCCGTG  
>HPV2\_Alpha\_9626032\_nt177\_E6\_AOS\_rc|1  
ATGCCCATATGTCAGCCTCTGATAACGGCCGTTTGCACCATAACACAGAGCAATCGCAAAT  
>HPV2\_Alpha\_9626032\_nt191\_E6\_AOS\_rc|1  
TTCTTTTATTGCAAATGCCCATATGTCAGCCTCTGATAACGGCCGTTTGCACCATAACACA  
>HPV2\_Alpha\_9626032\_nt184\_E6\_AOS\_rc|1  
ATTGCAAATGCCCATATGTCAGCCTCTGATAACGGCCGTTTGCACCATAACACAGAGCAAT  
>HPV2\_Alpha\_9626032\_nt170\_E6\_AOS\_rc|1  
TATGTCAGCCTCTGATAACGGCCGTTTGCACCATAACACAGAGCAATCGCAAATCCTCTAG  
>HPV41\_Nu\_9626041\_nt304\_E6\_AOS\_rc|1  
TGAAGTCCAGCCTTGCAAGCACTCTAGTACACTGAGAACAAATACCCGTTGGCCCCCCTT  
>HPV41\_Nu\_9626041\_nt293\_E6\_AOS\_rc|1  
CTTGCAAGCACTCTAGTACACTGAGAACAAATACCCGTTGGCCCCCCTTCTCCCCAGGAT  
>HPV41\_Nu\_9626041\_nt277\_E6\_AOS\_rc|1  
TACACTGAGAACAAATACCCGTTGGCCCCCCTTCTCCCCAGGATAAGTACAGACAGCTCT  
>HPV41\_Nu\_9626041\_nt270\_E6\_AOS\_rc|1  
AGAACAAATACCCGTTGGCCCCCCTTCTCCCCAGGATAAGTACAGACAGCTCTGGTCGAA  
>HPV41\_Nu\_9626041\_nt259\_E6\_AOS\_rc|1  
CCGTTGGCCCCCCTTCTCCCCAGGATAAGTACAGACAGCTCTGGTCGAAAGCGTAAATAT  
>HPV41\_Nu\_9626041\_nt242\_E6\_AOS\_rc|1  
CCCCAGGATAAGTACAGACAGCTCTGGTCGAAAGCGTAAATATCCAATACGCTAAGGATC  
>HPV41\_Nu\_9626041\_nt233\_E6\_AOS\_rc|1  
AAGTACAGACAGCTCTGGTCGAAAGCGTAAATATCCAATACGCTAAGGATCTTATAGCAA  
>HPV41\_Nu\_9626041\_nt224\_E6\_AOS\_rc|1  
CAGCTCTGGTCGAAAGCGTAAATATCCAATACGCTAAGGATCTTATAGCAATAATGGCAG  
>HPV41\_Nu\_9626041\_nt157\_E6\_AOS\_rc|1  
GTATGCATGGATAAGTTATCTGCTGCGCCAAACACAACCTCCCGTATGGTATGTGGCTTCT  
>HPV41\_Nu\_9626041\_nt150\_E6\_AOS\_rc|1  
TGGATAAGTTATCTGCTGCGCCAAACACAACCTCCCGTATGGTATGTGGCTTCTGCGTCTC  
>HPV1\_Mu\_9626063\_nt416\_E6\_AOS\_rc|1  
AACTCTATGCACTCTTCTCCGTTTGACACAACCTCCAATTTTTCAGCAACACTCAGTTT  
>HPV1\_Mu\_9626063\_nt409\_E6\_AOS\_rc|1  
TGCACCTCTTCTCCGTTTGACACAACCTCCAATTTTTCAGCAACACTCAGTTTTTTTATG  
>HPV1\_Mu\_9626063\_nt117\_E6\_AOS\_rc|1  
GCAATAAAACATCAATATATGGGATACAGAGGCTTTCGGAAAGCTGTCTGACGGTCCGGA  
>HPV1\_Mu\_9626063\_nt110\_E6\_AOS\_rc|1  
AACATCAATATATGGGATACAGAGGCTTTCGGAAAGCTGTCTGACGGTCCGGATTGGTGT  
>HPV18\_Alpha\_9626069\_nt142\_E6\_AOS\_rc|1  
CACAGGTTATTTCTATGTCTTGAGTGAAGTGTTTCAGTTCCGTGCACAGATCAGGTAGCT  
>HPV4\_Gamma\_9626597\_nt202\_E6\_AOS\_rc|1  
TTCCTCTAAATACTAAACTAAGTTTCTTAAGATAGAATAAAGCAAGATCCGCAAGATCGA  
>HPV63\_Mu\_9626605\_nt124\_E6\_AOS\_rc|1  
TGCAAGGAACAACCAAATCAATAAATGGGATACGGAGAGCAGAACTCAGATCCCGAACC



>HPV63\_Mu\_9626605\_nt214\_E6\_AOS\_rc|1  
CAAACACGAAATTATCTCGCCAGATAAGATGCAAGTCAAATAATCAAACAGCAATTTTT  
>HPV63\_Mu\_9626605\_nt117\_E6\_AOS\_rc|1  
AACAAACCAATCAATAAATGGGATACGGAGAGCAGAACTCAGATCCCCGAACCGAATGTAC  
>HPV16\_Alpha\_9627100\_nt484\_E6\_AOS\_rc|1  
CTACGTGTTCTTGATGATCTGCAACAAGACATACATCGACCGGTCCACCGACCCCTTATA  
>HPV5\_Beta\_9627145\_nt429\_E6\_AOS\_rc|2  
TTCCTAACACTGTCTGCTCATAAAATTGGTTAAATTCATAAGTTGCAGTGGCGCCACAGC  
>HPV5\_Beta\_9627145\_nt419\_E6\_AOS\_rc|1  
TGTCTGCTCATAAAATTGGTTAAATTCATAAGTTGCAGTGGCGCCACAGCATACGCGACA  
>HPV5\_Beta\_9627145\_nt251\_E6\_AOS\_rc|1  
ACAATCAATCACAGGGATGCCTAAGGCTTCAGCTAAGTCTCTAATACTTAAAGGTAATTC  
>HPV5\_Beta\_9627145\_nt244\_E6\_AOS\_rc|1  
ATCACAGGGATGCCTAAGGCTTCAGCTAAGTCTCTAATACTTAAAGGTAATTCCTGCCTTA  
>HPV5\_Beta\_9627145\_nt237\_E6\_AOS\_rc|1  
GGATGCCTAAGGCTTCAGCTAAGTCTCTAATACTTAAAGGTAATTCCTGCCTTATCTTTTT  
>HPV10\_Alpha\_9627257\_nt146\_E6\_AOS\_rc|1  
TGTTTTGTGCAAAATATACAGCACAGGCGAAGGTCTCCAAAGGTATTCACAATTTCTA  
>HPV10\_Alpha\_9627257\_nt192\_E6\_AOS\_rc|1  
ATATAATTCTCTAAGTGCAAATGCTGCCAATTCGCTGCGGTGAGCTGTTTTGTGCAAAA  
>HPV10\_Alpha\_9627257\_nt185\_E6\_AOS\_rc|1  
TCTCTAAGTGCAAATGCTGCCAATTCGCTGCGGTGAGCTGTTTTGTGCAAAATATACAG  
>HPV10\_Alpha\_9627257\_nt139\_E6\_AOS\_rc|1  
TGCAAAATATACAGCACAGGCGAAGGTCTCCAAAGGTATTCACAATTTCTACACAAAA  
>HPV26\_Alpha\_9627305\_nt240\_E6\_AOS\_rc|1  
ATTACACATCTTTTGCATGCAGCATACGGACTCCTATCTCTATATACTACTCTTAGGTCA  
>HPV26\_Alpha\_9627305\_nt255\_E6\_AOS\_rc|1  
ATTTTTGAATAAAATATTACACATCTTTTGCATGCAGCATACGGACTCCTATCTCTATAT  
>HPV26\_Alpha\_9627305\_nt248\_E6\_AOS\_rc|1  
AATAAAATATTACACATCTTTTGCATGCAGCATACGGACTCCTATCTCTATATACTACTC  
>HPV26\_Alpha\_9627305\_nt233\_E6\_AOS\_rc|1  
ATCTTTTGCATGCAGCATACGGACTCCTATCTCTATATACTACTCTTAGGTCACAAATTG  
>HPV26\_Alpha\_9627305\_nt226\_E6\_AOS\_rc|1  
GCATGCAGCATACGGACTCCTATCTCTATATACTACTCTTAGGTCACAAATTGCAAAATT  
>HPV26\_Alpha\_9627305\_nt103\_E6\_AOS\_rc|1  
AGTAGTATTCAAGCTTTCACATAGCTCATGTAGCGTTCTGGGTGCTTCTCTAGGATCCTC  
>HPV32\_Alpha\_9627327\_nt439\_E6\_AOS\_rc|1  
ACCTATTTAAAATGAATCTGAAATGCCGTCCGTTATAAATATGATGATCTTTCTCACTTG  
>HPV32\_Alpha\_9627327\_nt432\_E6\_AOS\_rc|1  
TAAAATGAATCTGAAATGCCGTCCGTTATAAATATGATGATCTTTCTCACTTGGCGATAA  
>HPV32\_Alpha\_9627327\_nt425\_E6\_AOS\_rc|1  
AATCTGAAATGCCGTCCGTTATAAATATGATGATCTTTCTCACTTGGCGATAAAGGCTTT  
>HPV32\_Alpha\_9627327\_nt169\_E6\_AOS\_rc|1  
CTTCAGCACTGGTTAAGTGGTTTTTACACCAAATACAGCAGATTTGTAAATTCGCGAGGG  
>HPV32\_Alpha\_9627327\_nt151\_E6\_AOS\_rc|1  
GGTTTTTACACCAAATACAGCAGATTTGTAAATTCGCGAGGGTCAGCCCCAAATCTTTGC  
>HPV34\_Alpha\_9627334\_nt141\_E6\_AOS\_rc|1  
ATACACACAGTCCAATTCTATTTTCATGTATTGAAATGTTGACCTCTTCACATAAGGCTGG  
>HPV49\_Beta\_9627363\_nt411\_E6\_AOS\_rc|1  
TATTAGCCGCTGCTCGTCCTTCTATTTTCGATGCCTACGACAATTTCTTGGTGATAATTAG  
>HPV49\_Beta\_9627363\_nt461\_E6\_AOS\_rc|2  
CAAATCTAGCCTCTTAAGGCAAATGAGACATCTGACTACTATCTCAGCAATATTAGCCGC  
>HPV49\_Beta\_9627363\_nt454\_E6\_AOS\_rc|1  
AGCCTCTTAAGGCAAATGAGACATCTGACTACTATCTCAGCAATATTAGCCGCTGCTCGT  
>HPV49\_Beta\_9627363\_nt447\_E6\_AOS\_rc|1

TAAGGCAAATGAGACATCTGACTACTATCTCAGCAATATTAGCCGCTGCTCGTCCTTCTA  
>HPV49\_Beta\_9627363\_nt393\_E6\_AOS\_rc|2  
CTTCTATTTTCGATGCCTACGACAATTTCTTGGTGATAATTAGTAAACTCGTGATATGCTG  
>HPV49\_Beta\_9627363\_nt386\_E6\_AOS\_rc|1  
TTCGATGCCTACGACAATTTCTTGGTGATAATTAGTAAACTCGTGATATGCTGATCTATA  
>HPV49\_Beta\_9627363\_nt379\_E6\_AOS\_rc|1  
CCTACGACAATTTCTTGGTGATAATTAGTAAACTCGTGATATGCTGATCTATAGGCACAA  
>HPV49\_Beta\_9627363\_nt372\_E6\_AOS\_rc|1  
CAATTTCTTGGTGATAATTAGTAAACTCGTGATATGCTGATCTATAGGCACAAGCTGCAC  
>HPV49\_Beta\_9627363\_nt365\_E6\_AOS\_rc|1  
TTGGTGATAATTAGTAAACTCGTGATATGCTGATCTATAGGCACAAGCTGCACAACAACC  
>HPV49\_Beta\_9627363\_nt358\_E6\_AOS\_rc|1  
TAATTAGTAAACTCGTGATATGCTGATCTATAGGCACAAGCTGCACAACAACCAAAGACA  
>HPV53\_Alpha\_9627377\_nt311\_E6\_AOS\_rc|1  
GCCCCGTACACTGAACAATTGTAATATCTTAATTTTCGGACCTTACTATAAAAATAGCAAA  
>HPV53\_Alpha\_9627377\_nt342\_E6\_AOS\_rc|1  
TAACTTTTTTTAGTTAGTGCTTCCAGGCTAGCCCCGTACACTGAACAATTGTAATATCT  
>HPV53\_Alpha\_9627377\_nt335\_E6\_AOS\_rc|1  
TTTTTAGTTAGTGCTTCCAGGCTAGCCCCGTACACTGAACAATTGTAATATCTTAATTTT  
>HPV53\_Alpha\_9627377\_nt328\_E6\_AOS\_rc|1  
TTAGTGCTTCCAGGCTAGCCCCGTACACTGAACAATTGTAATATCTTAATTTTCGGACCT  
>HPV53\_Alpha\_9627377\_nt321\_E6\_AOS\_rc|2  
TTCCAGGCTAGCCCCGTACACTGAACAATTGTAATATCTTAATTTTCGGACCTTACTATA  
>HPV7\_Alpha\_9627389\_nt296\_E6\_AOS\_rc|1  
GCATATGCAGCGTATCTAAAGTTCCTATACTGATTCACCTTTTCCATAAAAATTCTAAACAC  
>HPV7\_Alpha\_9627389\_nt289\_E6\_AOS\_rc|1  
CAGCGTATCTAAAGTTCCTATACTGATTCACCTTTTCCATAAAAATTCTAAACACTTTACAC  
>HPV7\_Alpha\_9627389\_nt282\_E6\_AOS\_rc|1  
TCTAAAGTTCCTATACTGATTCACCTTTTCCATAAAAATTCTAAACACTTTACACACGCTGC  
>HPV7\_Alpha\_9627389\_nt106\_E6\_AOS\_rc|1  
TTATATTGCACTGGTCACATAATTCAAATAAAGTTCTAGCTGTGGAGCCGCAACGTGCAG  
>HPV9\_Beta\_9627396\_nt420\_E6\_AOS\_rc|1  
CTATATCTTTTCCAACCTACAGCAAATTGAAAAAATGTGTAAATTCTAACTGTGCAGACG  
>HPV9\_Beta\_9627396\_nt460\_E6\_AOS\_rc|1  
CTAATACAAATATTTCCAATAGCTGTTCTTCTACAGTTTCTATATCTTTTCCAACCTACA  
>HPV9\_Beta\_9627396\_nt453\_E6\_AOS\_rc|1  
AAATATTTCCAATAGCTGTTCTTCTACAGTTTCTATATCTTTTCCAACCTACAGCAAATT  
>HPV9\_Beta\_9627396\_nt446\_E6\_AOS\_rc|1  
TCCAATAGCTGTTCTTCTACAGTTTCTATATCTTTTCCAACCTACAGCAAATTGAAAAA  
>HPV9\_Beta\_9627396\_nt439\_E6\_AOS\_rc|1  
GCTGTTCTTCTACAGTTTCTATATCTTTTCCAACCTACAGCAAATTGAAAAAATGTGTA  
>HPV9\_Beta\_9627396\_nt432\_E6\_AOS\_rc|1  
CTTCTACAGTTTCTATATCTTTTCCAACCTACAGCAAATTGAAAAAATGTGTAAATTCTA  
>HPV54\_Alpha\_9628437\_nt314\_E6\_AOS\_rc|1  
TCCACTGTTCCCACAGGCACGCACGGTCGCGATGCCTTCTATAATTTATTTGCCCGTGC  
>HPV54\_Alpha\_9628437\_nt307\_E6\_AOS\_rc|1  
TTTCCCACAGGCACGCACGGTCGCGATGCCTTCTATAATTTATTTGCCCGTGCAGTTCTA  
>HPV54\_Alpha\_9628437\_nt300\_E6\_AOS\_rc|1  
CAGGCACGCACGGTCGCGATGCCTTCTATAATTTATTTGCCCGTGCAGTTCTAGGCACAG  
>HPV24\_Unclassified\_9628486\_nt231\_E6\_AOS\_rc|1  
AAAAGTTACATGGTACAACACAATCGTCTAATGGTATATTTAATAATCTACTAAGTTCTA  
>HPV24\_Unclassified\_9628486\_nt395\_E6\_AOS\_rc|1  
TTCCCCAACCTATCACACTCTCTACAAAATAATTTTCAAATTCAAATGCTGCTGTAGCAAC  
>HPV24\_Unclassified\_9628486\_nt385\_E6\_AOS\_rc|1  
ATCACACTCTCTACAAAATAATTTTCAAATTCAAATGCTGCTGTAGCAACACAACAATAT

>HPV24\_Unclassified\_9628486\_nt378\_E6\_AOS\_rc|1  
TCTCTACAAAATAATTTTCAAATTCAAATGCTGCTGTAGCAACACAACAATATCTACAAC  
>HPV24\_Unclassified\_9628486\_nt224\_E6\_AOS\_rc|1  
ACATGGTACAACACAATCGTCTAATGGTATATTTAATAATCTACTAAGTTCTAACACTGA  
>HPV24\_Unclassified\_9628486\_nt217\_E6\_AOS\_rc|1  
ACAACACAATCGTCTAATGGTATATTTAATAATCTACTAAGTTCTAACACTGACTGAGGT  
>HPV48\_Gamma\_9628542\_nt214\_E6\_AOS\_rc|1  
CAAATGGTGTATTATCTCTCCAAATTACAGACAGTCGTTTGTATGAAAAGAAGCAAGAT  
>HPV50\_Gamma\_9628550\_nt402\_E6\_AOS\_rc|1  
ACCACCGTGACAAATACAATCGTACTTTTCAATATAATCCAACAAACACATACAATTTTC  
>HPV50\_Gamma\_9628550\_nt426\_E6\_AOS\_rc|1  
ATTACCTCTAACTAAATGAAAATAACCACCGTGACAAATACAATCGTACTTTTCAATATA  
>HPV50\_Gamma\_9628550\_nt419\_E6\_AOS\_rc|1  
CTAACTAAATGAAAATAACCACCGTGACAAATACAATCGTACTTTTCAATATAATCCAAC  
>HPV50\_Gamma\_9628550\_nt412\_E6\_AOS\_rc|1  
AATGAAAATAACCACCGTGACAAATACAATCGTACTTTTCAATATAATCCAACAAACACA  
>HPV50\_Gamma\_9628550\_nt395\_E6\_AOS\_rc|1  
TGACAAATACAATCGTACTTTTCAATATAATCCAACAAACACATACAATTTTCACAGCGA  
>HPV60\_Gamma\_9628566\_nt383\_E6\_AOS\_rc|1  
TCTGCAAAAGATAACAATGTAAGGCAATCAAAACAGCGTACAGAAAGAGAACTCAAAGGA  
>HPV60\_Gamma\_9628566\_nt282\_E6\_AOS\_rc|1  
CTGAAAATAGTTTTTCAGCTTCAAATTTAGCAGTAAGTCTAAGACACGGAGTACAACAAGC  
>HPV61\_Alpha\_9628574\_nt292\_E6\_AOS\_rc|1  
TGGGTCCGTAACAGGAATGGTCCCAATGTGCGCAGCTCCCTCACTTTTACTTCACGTGCCA  
>HPV61\_Alpha\_9628574\_nt318\_E6\_AOS\_rc|1  
TGACCGTCCGTGTGTCTGTTCCACAGTGGGTCCGTAACAGGAATGGTCCCAATGTGCGCAG  
>HPV61\_Alpha\_9628574\_nt285\_E6\_AOS\_rc|1  
GTAACAGGAATGGTCCCAATGTGCGCAGCTCCCTCACTTTTACTTCACGTGCCAAGCATGG  
>HPV61\_Alpha\_9628574\_nt277\_E6\_AOS\_rc|1  
AATGGTCCCAATGTGCGCAGCTCCCTCACTTTTACTTCACGTGCCAAGCATGGTGCGCATA  
>HPV61\_Alpha\_9628574\_nt106\_E6\_AOS\_rc|1  
CCTCAAAGTCCACCTCGTAGTCCTTGCGAGCAGGAAAATATTAGTTGGATTGCACGGTC  
>HPV82\_Alpha\_6970427\_nt133\_E6\_VE|1  
ACGCTGCACGAATTATGTGAAGCCTGCAATACGTCTATGCACAATATTCAGGTATTGTGT  
>HPV106\_Alpha\_71726710\_nt242\_E6\_VE|1  
CTGAAAGCAGCTGGAAAACCTTAGACAATTTAGATACTGGGACTACTCCAGCTATGCACCC  
>HPV35\_Alpha\_333050\_nt111\_E6\_VE|1  
ATGTTTCAGGACCCAGCTGAACGACCTTACAAACTGCATGATTTGTGCAACGAGGTAGAA  
>HPV92\_Beta\_27531786\_nt107\_E6\_VE|1  
ATGGCAAAACCTCCTTCGGTGCAGGAACCTTAGAAGACAGTTAGATATTCCATTGGAGGAC  
>HPV43\_Alpha\_40804474\_nt223\_E6\_VE|1  
ACGGAAGTATTATCGTTTGCATTTAGAGATTTAAAGGTTGTGTGGCGCGACGGATATCCG  
>HPV40\_Alpha\_397014\_nt343\_E6\_VE|1  
TACGCAGCCTATGCACCAACCGTGGAAGAAGAGACAGGATTAACCATTTTACAAGTAAGG  
>HPVcand87\_Alpha\_14475578\_nt448\_E6\_VE|1  
GAGCATATGATACACGCGAATCTGCACTTCCACAAAATAGCTGGGAAGTGGACAGGAAAG  
>HPV70\_Alpha\_1173493\_nt108\_E6\_VE|1  
ATGGCGCGATTTCCCAATCCTGCAGAACGCGCCATACAAATTGCCTGACCTGTGCACGGCG  
>HPV90\_Alpha\_22138122\_nt32\_E6\_VE|1  
ATCTTCCTATTGTGCAAAGTCTATGAACCTGGACCTGCAGGACCTGAACATAACCTGCGTG  
>HPV38\_Beta\_1020234\_nt561\_E6\_VE|1  
CAAGCATTTTACAAGGTTAGAGGCAATTGGAAAGGAAGGTGCAGGCATTGCAAAGCAATA  
>HPV91\_Alpha\_22023568\_nt332\_E6\_VE|1  
AAGGTTGTGTGGCGCGACAGTTATCCGTTTGCAGCGTGTGGCCTGCTTAAAATTTTAT  
>HPV51\_Alpha\_333087\_nt398\_E6\_VE|1

ATAAGGTGTCATAGATGTCAAAGACCACTTGGGCCTGAAGAAAAGCAAAAATTGGTGGAC  
>HPV45\_Alpha\_397022\_nt103\_E6\_VE|1  
ATGGCGCGCTTTGACGATCCAAAGCAACGACCCTACAAGCTACCAGATTTGTGCACAGAA  
>HPV40\_Alpha\_397014\_nt403\_E6\_VE|1  
ATTAGATGCTGCAAGTGCCACAAGCCTTTGTCTCCCGTGGAAAAACCAACCATATTGTA  
>HPV20\_Beta\_1020162\_nt441\_E6\_VE|1  
GTTTTTGCATGCTGTCGTGTTTGTCTGCTCGGCAACAGCGACATATGAGTTTAATCAATTT  
>HPV8\_Beta\_333074\_nt602\_E6\_VE|1  
AAAGTTAGAGGAGGCTGGAAAGGAGTTTGCAGGCTTTGTAAGCATTTGTATCATGATTGG  
>HPV32\_Alpha\_9627327\_nt163\_E6\_VE|1  
GGGCTGACCCCTGCGGAATTTACAAATCTGCTGTATTTGGTGTAAAAACCACTTAACCAGT  
>HPV33\_Alpha\_333049\_nt110\_E6\_VE|1  
ATGTTTCAAGACACTGAGGAAAAACACGAACATTGCATGATTTGTGCCAAGCATTTGGAG  
>HPV34\_Alpha\_9627334\_nt433\_E6\_VE|1  
CTGTGTCCATTGGAAAAGCAAAGGCATGTAGATGAAAACAAACGGTTTCACCAAATAGCG  
>HPV82\_Alpha\_6970427\_nt433\_E6\_VE|1  
GGGCCTGAAGAAAAGCAAAAGGTGGTGGACGACAAAAAAGGTTTCATGAAATAGCGGGA  
>HPV47\_Beta\_333062\_nt479\_E6\_VE|1  
CAACACAGTGTTAGGTAGAGATATTGAGCTAGCTACAGGCCTTTCCATTTTGTGAGATTGAC  
>HPV94\_Alpha\_40804528\_nt244\_E6\_VE|1  
TTGGTGTGGAAAGCGGGAGTGCCATACGGTGCCTGTGCCCGGTGTTTACTTCTGCAGGGC  
>HPV59\_Alpha\_557236\_nt446\_E6\_VE|1  
GCTGGAATATATACAGGACAGTGTCGTGGGTGTGCGACCCGAGCAAGACACCTAAGACAG  
>HPV44\_Alpha\_1020242\_nt106\_E6\_VE|1  
ATGGAAAGTGCAAATGCCTCCACGTCTGCACAAAGTATAGACCAGTTGTGCAAGGAGTGC  
>HPV93\_Beta\_37089393\_nt466\_E6\_VE|1  
AAGCTTGATATCTGTGGTAGATCTCTATTGTTTTACAAAGTGAGGAGGGGCTGGAAAGGA  
>HPV20\_Beta\_1020162\_nt201\_E6\_VE|1  
ATGGCTACACCTCCTTCTTCAGAAGACAGCGCTGATGAAGGACCATCTAATATTGGAGAG  
>HPV38\_Beta\_1020234\_nt261\_E6\_VE|1  
GAGGATCTGTTATTACCCTGTAGATTCTGCAACAGTTTCCTCACGTACATTGAATTACGT  
>HPV27\_Alpha\_396964\_nt400\_E6\_VE|1  
ATACCTCAGCTGTTTATGAGATGCTATATCTGCCATAAGCCCCTGAGCTGGGAGGAGAAG  
>HPV41\_Nu\_9626041\_nt343\_E6\_VE|1  
GTGCTTGCAAGGCTGGAGTTCACCTGCACGGCACGAAGTGTCTTGTGCAGCCAGCCGTCTG  
>HPV54\_Alpha\_9628437\_nt433\_E6\_VE|1  
CCTTTGTGCAACGTGGAAAAGCAACGGCACGTAGATTACAACAGGCGATTCCACTGTGTT  
>HPV15\_Beta\_396924\_nt201\_E6\_VE|1  
ATGGATAGGCCAAAGCCTTTTTCTGTGCAGCAGCTTGCAGACACTCTGTGTATACCTTTA  
>HPV96\_Beta\_50253426\_nt210\_E6\_VE|1  
ACGGTAAGTTTCGCAACTCTCTCGGTTGCCAAAAGTTTATCTTGAGAGGTTGTTGGCAA  
>HPV10\_Alpha\_9627257\_nt403\_E6\_VE|1  
AGATGCTACATGTGTACAAACCGCTGGTAAGGGAAGAAAAAGACAGACATCGTAACGAA  
>HPV5\_Beta\_9627145\_nt381\_E6\_VE|1  
CTTAGTCTAATTTGGAAAGATTATTGTGTGTTTGCCTGTCTGCGTATGCTGTGGCGCC  
>HPV41\_Nu\_9626041\_nt373\_E6\_VE|1  
CACGAAGTGTCTTGTGCAGCCAGCCGTCTGCCGCACTTTATAGGACAGAGCCTCAGCGAC  
>HPV7\_Alpha\_9627389\_nt223\_E6\_VE|1  
GAGGTGCTGGCCTTTGCATTTAGAGAGTTATATGTAGTGTGGCGCAACGACTTTCCTTTT  
>HPV95\_Gamma\_40804520\_nt112\_E6\_VE|1  
ATGGCAAATGGCAGACCTACAACCTTGGACGAGTACTGCAGGAGATTTGACATTTCTTTT  
>HPV72\_Alpha\_1491683\_nt403\_E6\_VE|1  
AGGTGCCATGCATGCTGCAAACCCCTAAGCTGTGAGGAAAAGGAATATCAGGTGCAGACA  
>HPV67\_Alpha\_3228267\_nt163\_E6\_VE|1  
ACCACGGTGCATGAAATAAGTTTGCCTGCGTGCAGTGCAAAAAAAGCTTTGGACAGAAAC

>HPV90\_Alpha\_22138122\_nt302\_E6\_VE|1  
AGATGCTACCTGTGCCATAAACCCTGTGCAGTGAGGAAAAGGAACGGCTTATCAGTGAA  
>HPV28\_Alpha\_1020202\_nt343\_E6\_VE|1  
TATGTGGAAGGCGTGGAAGAGGAGACAAAACAATCTATAGATACACAGCAAGTGAGATGC  
>HPV11\_Alpha\_333026\_nt493\_E6\_VE|1  
AACCAGTGGAAGGTCGTTGCTTACACTGCTGGACAACATGCATGGAAGACTTGTACCC  
>HPV80\_Beta\_2911565\_nt351\_E6\_VE|1  
TGGACTGAAGAAGACTTTGTCTTTGCTTGTGTAGCAGTTGTGCTTTTGCTACTGCACAA  
>HPV68a\_Alpha\_71726685\_nt32\_E6\_VE|1  
CCATACAAATTGCCAGACCTGTGCAGGACATTGGACACTACATTGCATGACGTTACAATA  
>HPV6\_Alpha\_6002612\_nt494\_E6\_VE|1  
TGTACGTGGAAGGTCGCTGCCTACACTGCTGGACAACATGCATGGAAGACATGTTACCC  
>HPV63\_Mu\_9626605\_nt253\_E6\_VE|1  
TGGCGAGATAATTTTCGTGTTTGCTTGTGTGCTAGGCATGTTAGTCTGCTT  
>HPV43\_Alpha\_40804474\_nt133\_E6\_VE|1  
CGGACTATATTTGAGTTGTGTGATGAGTGTAACATAACTTTGCCTACTCTGCAAATTGGG  
>HPV34\_Alpha\_9627334\_nt103\_E6\_VE|1  
ATGTTTTTTTCCCAATCCTGAGGAACGGCCATACAAGCTACCAGCCTTATGTGAAGAGGTC  
>HPV69\_Alpha\_6970418\_nt313\_E6\_VE|1  
TCAAAAATAATAGAATATAGACGCTACACATCGTCTGTGTATGGTGCAACACTGGAAGCG  
>HPV51\_Alpha\_333087\_nt98\_E6\_VE|1  
ATGTTTGAAGACAAGAGGGAAAGACCACGAACGCTGCATGAATTATGTGAAGCTTTGAAC  
>HPV29\_Alpha\_1020210\_nt373\_E6\_VE|1  
ACAAACGAGTCCATATATACACAGCTAATTCGCTGCTACATGTGCCACAAGCCACTTGTC  
>HPV102\_Alpha\_71726718\_nt32\_E6\_VE|1  
TTTGTGCTGTGCAAAGAATGTGAAGTGGATTTGGAGGACTTACGACTGCTTTGCATTTAT  
>HPV23\_Beta\_1020186\_nt261\_E6\_VE|1  
CGACCACTGACGGTACAGCAACTTAGTGATAAGTTGACAGTACCAGTGGTAGATCTCTTG  
>HPV84\_Alpha\_12958167\_nt272\_E6\_VE|1  
ACAGGATTACCACCTTGACAAATAAATATAAGGTGCCACGCGTGTGCAAGCCATTGTGC  
>HPV71\_Alpha\_12084981\_nt263\_E6\_VE|1  
AGGAGCTGAAAGTTGTGTGGAGAAGTGGTTTTCCGTTTGCTGCATGTGCCTGCTGTTTGG  
>HPV91\_Alpha\_22023568\_nt302\_E6\_VE|1  
GAAGTGTTGTCGTTTGCATTTAGGGATTTAAAGGTTGTGTGGCGGACAGTTATCCGTTT  
>HPV37\_Beta\_1020226\_nt561\_E6\_VE|1  
CAACAATTTTACAAGGTTAGGCGCAATTGGAAAGGCTTGTGTAGACATTGTGGGTCGATA  
>HPV84\_Alpha\_12958167\_nt212\_E6\_VE|1  
AAAGTACGTGAGCTACGCCACTGGGATTACTCCAGCTTTGGACCAACAGTGGAAGAAGAA  
>HPV95\_Gamma\_40804520\_nt172\_E6\_VE|1  
TTTGATTTGCGTCTTCCTTGTATTTTTTGTCTTTCATCCGTTGATCTTGCAAGCTTGCT  
>HPV21\_Beta\_1020170\_nt201\_E6\_VE|1  
ATGGCTGACTCTTCAACAGACAGTGCTGACGAAGGTCCTTCTCCTAAGCGTAGACATTTA  
>HPV4\_Gamma\_9626597\_nt103\_E6\_VE|1  
ATGGCAGATGGCAGACCTGCAACCTTGGACGACTTCTGCAGACGATTCGACATTTCTTTT  
>HPV12\_Beta\_396910\_nt381\_E6\_VE|1  
CTAATTTGGAAAGGTCATTTTGTACTGCTGTGCTGCAAGTTGTTGCGCAGCTACTGCA  
>HPV32\_Alpha\_9627327\_nt313\_E6\_VE|1  
TATTCTAAAGTGTGTGCACTGCGACACTACGACAGATCAGCATTTTGGCATAACAGTAGAA  
>HPV22\_Beta\_1020178\_nt240\_E6\_VE|1  
CTGACAGTACAGCAACTTAGTGATAAGTTGACTGTACCTGTAGTAGATCTTTTGCTACCT  
>HPV20\_Beta\_1020162\_nt231\_E6\_VE|1  
GCTGATGAAGGACCATCTAATATTGGAGAGGCAAAACCTCCAATCTTAGAGCCACCATTG  
>HPV63\_Mu\_9626605\_nt283\_E6\_VE|1  
CAGTGCTGTGCTAGGCATGTTAGTCTGCTTGAGTTTATGCTTTATTATCAGGAGTCTTTT  
>HPVFA75/KI88-03\_Unclassified\_206902429\_nt493\_E6\_VE|1

TTAGACAATTGTGCTAGGCATCAGCAGTTTTATAAGGTGAGAGGTAATTGGAAGGGATTG  
>HPV81\_Alpha\_40804509\_nt253\_E6\_VE|1  
GCAATAAGAGAGCTAAACTTGGTGTGGCGAAAGAACTGGCCATTTGGAGTATGCGCAGCG  
>HPV1\_Mu\_9626063\_nt105\_E6\_VE|1  
ATGGCGACACCAATCCGGACCGTCAGACAGCTTCCGAAAGCCTCTGTATCCCATATATT  
>HPV107\_Beta\_126131393\_nt620\_E6\_VE|1  
GAGAAGTTAGACAATTGTGCTAGGCATCAGCAGTTTTTTTAAGGTGAGAGGTAATTGGAAG  
>HPV22\_Beta\_1020178\_nt390\_E6\_VE|1  
GTGTTTGCATGTTGCAGCGGCTGTGCCTACGCTTCAGCCCAATTTGAATTCAGCAGTAT  
>HPV33\_Alpha\_333049\_nt470\_E6\_VE|1  
TTAAACAAACGATTTTCATAATATTTCCGGTCGTTGGGCAGGGCGCTGTGCGGCGTGTGG  
>HPVFA75/KI88-03\_Unclassified\_206902429\_nt163\_E6\_VE|1  
ATGGAGAGGCCCTAGAACAGTACAAGTTCTGAGTCGGCATTTAGAAATACCAATAGAAGAT  
>HPV96\_Beta\_50253426\_nt270\_E6\_VE|1  
TTACAACCTGCCACTCATAAACAAGTAACCGCCTGCGTTTCTAGGACATTTTATATACAG  
>HPV20\_Beta\_1020162\_nt621\_E6\_VE|1  
TGTGGCAGAAAGCGTCCATTTTATTTAGTGAGAGGCTCTTGAAAGGAATCTGTAGGCTG  
>HPV41\_Nu\_9626041\_nt403\_E6\_VE|1  
CCGCACCTTTATAGGACAGAGCCTCAGCGACCTTGAGGTGAGGTGTGTGAGGTGCCTAGCT  
>HPV18\_Alpha\_9626069\_nt406\_E6\_VE|1  
TTATTAATAAGGTGCCTGCGGTGCCAGAAACCGTTGAATCCAGCAGAAAAACTTAGACAC  
>HPV93\_Beta\_37089393\_nt136\_E6\_VE|1  
GCAGTAAGTAAACCTCAGACCATTACAGAGCTTGCTAGGTGTCTTGGTATACCGTTAGAA  
>HPV51\_Alpha\_333087\_nt458\_E6\_VE|1  
GAAAAAAAAAAGGTTCCATGAAATAGCGGGACGTTGGACGGGGCAATGCGCTAATTGCTGG  
>HPV65\_Gamma\_312100\_nt103\_E6\_VE|1  
ATGGCAGATGGCAGACCTGCAGCTTTGGACGACTTCTGCAGACGATTTGATATTTCTTTT  
>HPV90\_Alpha\_22138122\_nt362\_E6\_VE|1  
GGCAAACGGTTCATAAAATAGCTGGGCTTTGGCGAGGCGCTTGCCCTGCAGTGTGGAAA  
>HPV53\_Alpha\_9627377\_nt403\_E6\_VE|1  
TCTGATTTATCAATAAGGTGCTACAGATGTCAACATCCGTTGACACCAGAGGAAAAACAG  
>HPV67\_Alpha\_3228267\_nt103\_E6\_VE|1  
ATGTTTCAGGACACAGACGAAAAACCACGCAACCTGCACGAATTGTGTGAAGCTTTGGAA  
>HPV54\_Alpha\_9628437\_nt463\_E6\_VE|1  
GTAGATTACAACAGGCGATTCCACTGTGTTAGAGGCTATTGGAAGGGTAGGTGTCTACAT  
>HPV8\_Beta\_333074\_nt392\_E6\_VE|1  
TACGTTGTTACTGCGTGTTGTGCTGTTGTTGTTGTGTAGCAACCGCAACGTTTGAATTTAAT  
>HPVcand89\_Alpha\_22095322\_nt392\_E6\_VE|1  
ACAGGAAAGTGTGCAACTGCAGGGTAATATGCACGGCCGCACGCCGACCATCCAGGATA  
>HPV80\_Beta\_2911565\_nt201\_E6\_VE|1  
ATGGATAGGCCAAAGCCTTCTTCTGTGCAGGAGCTTGACAGACACTCTTTGTATACCTTTA  
>HPV5\_Beta\_9627145\_nt411\_E6\_VE|1  
TTTGCGTGCTGTCGCGTATGCTGTGGCGCCACTGCAACTTATGAATTTAACCAATTTTAT  
>HPV93\_Beta\_37089393\_nt376\_E6\_VE|1  
GGCTGGGCAATAGAAGTTAAGGAAAAAAGCCACTCTCTGAAATTATAGTGAGGTGTGCG  
>HPV49\_Beta\_9627363\_nt501\_E6\_VE|1  
TGCCTTAAGAGGCTAGATTTGTTGGAAAAGCTTGATATTTGTGCACAGCACAGAGAGTTT  
>HPV40\_Alpha\_397014\_nt223\_E6\_VE|1  
GAGGTACTGGCCTTTGCCTTTAGAGAGTTATATGTTGTGTGGCGCGACGACTTTCCACAC  
>HPV21\_Beta\_1020170\_nt441\_E6\_VE|1  
GATCATTTGTGTGTTTGCCTGTTGTGCTGTTTGTGCGCAGCAACAGCGACATATGAATAT  
>HPV30\_Alpha\_396973\_nt163\_E6\_VE|1  
GTACAAGAAACATCGTTGCTGGAGCTACAGCTACAGTGTGTATATTGCAAGAAGGAATTA  
>HPV17\_Beta\_396932\_nt351\_E6\_VE|1  
TGGACTGAAGAAGATTTTGTGTTTGCCTGTTGCAGTAGTTGTGCGTATGCTACAGCACAG

>HPV43\_Alpha\_40804474\_nt403\_E6\_VE|1  
TGCATTAGATGCTGTAAGTGCCACAAGCCATTATCACCAGTGGAAAAAGTACAGCATATT  
>HPV41\_Nu\_9626041\_nt433\_E6\_VE|1  
CTTGAGGTGAGGTGTGTGAGGTGCCTAGCTCTTCTACAATCTGTGGAAAAGGATTACATA  
>HPV82\_Alpha\_6970427\_nt313\_E6\_VE|1  
TCTAGAATTAGAGAATACAGAAGGTATAGTAGGTCTGTGTATGGTGCTACATTAGAGGCC  
>HPVRTRX7\_Unclassified\_30315616\_nt325\_E6\_VE|1  
TGCAACTTCTGTGGAAGGTTCTTAGATTTTTTGGAGGTTTGCGAGTTTGACAAAAGCAG  
>HPV111\_Beta\_186461202\_nt157\_E6\_VE|1  
ATGGATAGGCCAAAGCCTAGGACAGTAAAGGAACTAGCAGACACACTAGCAATTCCTGTA  
>HPV14D\_Beta\_396918\_nt447\_E6\_VE|1  
GTCATTGTGTATTTGCTTGTTGCCGTGTATGCTGCACAGCAACAGCAACGTATGAGTTTA  
>HPV91\_Alpha\_22023568\_nt182\_E6\_VE|1  
TCTGCACGTAGCTGCTCCCAAACGCTAAGACCATATTTGAGTTGTGTGACCAGTGTAAC  
>HPV52\_Alpha\_397038\_nt103\_E6\_VE|1  
ATGTTTGAGGATCCAGCAACACGACCCCGACCCCTGCACGAATTGTGTGAGGTGCTGGAA  
>HPV56\_Alpha\_397053\_nt103\_E6\_VE|1  
ATGGAGCCACAATTCAACAATCCACAGGAACGTCCACGAAGCCTGCACCACTTGAGTGAG  
>HPV23\_Beta\_1020186\_nt501\_E6\_VE|1  
GAAATTGAGCAGGAGGAGCAACGACCTATAGGCCAAATTTGTATTAGGTGTCAGTATTGT  
>HPV110\_Beta\_186461194\_nt173\_E6\_VE|1  
ATGGCCAGGCCAAAGCCTTTGACAGTACAACAGCTTGCAGATACATTATGCATTCCTGTT  
>HPV31\_Alpha\_333048\_nt109\_E6\_VE|1  
ATGTTCAAAAATCCTGCAGAAAGACCTCGGAAATTGCATGAACTAAGCTCGGCATTGGAA  
>HPV25\_Beta\_396948\_nt591\_E6\_VE|1  
CTTGATATTTGTGGCAGAAGACGTCTTTCCATCTAGTAAGAGGCTCTTGGAAGGAATC  
>HPV22\_Beta\_1020178\_nt360\_E6\_VE|1  
TTGCAATTAATTTGGACAGACGAGGACTTTGTGTTTGCATGTTGCAGCGGCTGTGCCTAC  
>HPV66\_Alpha\_1020290\_nt493\_E6\_VE|1  
ATAGCATATGCATGGACCGGTCATGTTTGCAGTGTTGGAGACATACGAGTAGACAAGCT  
>HPV55\_Alpha\_1020266\_nt103\_E6\_VE|1  
ATGGAAAGTGCAAATGCCTCCACGGCTGCACAAAGTATAGACCAGTTGTGCAAGGAGTGC  
>HPV42\_Alpha\_333211\_nt259\_E6\_VE|1  
AAAGATTTGGTAGTGGTGTGGAGGAAGGACTTTCCATATGCTGCATGTGCATTTTGTTTA  
>HPV66\_Alpha\_1020290\_nt403\_E6\_VE|1  
GATTTATCAATAAGGTGCTACCGATGTCAATGTCCGTTAACACCGGAGGAAAAACAATTG  
>HPV18\_Alpha\_9626069\_nt466\_E6\_VE|1  
CTTAATGAAAAACGACGATTTTACAACATAGCTGGGCACTATAGAGGCCAGTGCCATTCG  
>HPV22\_Beta\_1020178\_nt570\_E6\_VE|1  
TGCTGTTCCAATCAACCATTTTACAAGGTTAGAGATCATTGGAAGGGAAGGTGCAGGCAC  
>HPV102\_Alpha\_71726718\_nt362\_E6\_VE|1  
GATAGGTTTCATAAAATAGCAGGGGAGTGGACAGGAAAGTGCTGCAACTGTAGGGTATCA  
>HPV82\_Alpha\_6970427\_nt103\_E6\_VE|1  
ATGTTTGAAGACATAAGAGAAAGACCACGAACGCTGCACGAATTATGTGAAGCCTGCAAT  
>HPV47\_Beta\_333062\_nt419\_E6\_VE|1  
GCCTGCTGCCGTTTGTGCTGCTCAGCAACTGCCACATATGAATTTAATGTTTTTATCAA  
>HPV23\_Beta\_1020186\_nt291\_E6\_VE|1  
AAGTTGACAGTACCAGTGGTAGATCTCTTGCTACCTTGCAGATTTTGTCTAGGTTTCTT  
>HPV88\_Gamma\_167600365\_nt198\_E6\_VE|1  
CAGTTGGGTTCTGTTCTATCAGAAACAGCTTAGTTTGGTCTGGAGGAGCGGTGCTTGTTTT  
>HPVcand85\_Alpha\_4574720\_nt496\_E6\_VE|1  
GCAGGGAAATATAGAGGACAGTGTCGCCGGTGCATGACGCGTGCAACAAGAACAGCAAGGC  
>HPV19\_Beta\_396940\_nt441\_E6\_VE|1  
GCTTGCTGTGCTGGTGTGTCACAGCAACTGCAACATTTGAATTTAATGAGTTCTATGAG  
>HPV54\_Alpha\_9628437\_nt403\_E6\_VE|1

ATATTTATAAGGTGCTGGCTGTGCCATAAACCTTTGTGCAACGTGGAAAAGCAACGGCAC  
>HPV30\_Alpha\_396973\_nt493\_E6\_VE|1  
ATATCACGTACGTGGACCGGTTATGTCTGCAATGCTGGAGACACACAACGTCCACTGAG  
>HPV31\_Alpha\_333048\_nt469\_E6\_VE|1  
AAAAAGAAACGATTCCACAACATAGGAGGAAGGTGGACAGGACGTTGCATAGCATGTTGG  
>HPVcand86\_Alpha\_15741127\_nt182\_E6\_VE|1  
GTGTGCCTAAAATGCATATGCAGAGAAGCCAAGGTACGTGAGCTACGACACTGGGAGCAC  
>HPV35\_Alpha\_333050\_nt471\_E6\_VE|1  
GAAAAAAAACGATTCCATAACATCGGTGGACGGTGGACAGGTGGTGTATGTCCTGTTGG  
>HPV38\_Beta\_1020234\_nt441\_E6\_VE|1  
GTCTTTGGCCGTGAAATTGAACAGGTGGAGCAACAGACAATAGGCCTTATTGTTATAAGG  
>HPV77\_Alpha\_2911558\_nt253\_E6\_VE|1  
GTGGTGTGGAGAGGTGGGGCGCCGTACGGTGCATGTGCACGGTGTCTTACTGCTATATGGC  
>HPV25\_Beta\_396948\_nt231\_E6\_VE|1  
GGACCACCAGAGCAAGCGCAGGTTATACAGCCACCATTGCCAGCAACAATTACTGATCTA  
>HPV14D\_Beta\_396918\_nt477\_E6\_VE|1  
GCTGCACAGCAACAGCAACGTATGAGTTAATGAATTTTATGAGAGTACTGTTGAAGGCA  
>HPV26\_Alpha\_9627305\_nt428\_E6\_VE|1  
GGGCCAGAAGAAAAACAAAGAAATTGTGGATGAAAAGCGACGATTTACGAAATAGCAGGG  
>HPV28\_Alpha\_1020202\_nt253\_E6\_VE|1  
TGGAGAACGGGAGCGCCCTATGGTGCCTGTGCCCGGTGTTTACTACTGCAGGGCATTGTG  
>HPV33\_Alpha\_333049\_nt140\_E6\_VE|1  
ACATTGCATGATTTGTGCCAAGCATTGGAGACAACATATACACAACATTGAACTACAGTGC  
>HPV42\_Alpha\_333211\_nt139\_E6\_VE|1  
CAGCCACGCACATTATACCAATTGTGTAAGGAATTTGGGCTGACATTGCGGAATTTACAG  
>HPV96\_Beta\_50253426\_nt360\_E6\_VE|1  
GATTTAAAGACAGTGCAGCAACTTAGAAGTCATTTGGGCATTCTTACTGAAGACCTGTTG  
>HPV96\_Beta\_50253426\_nt150\_E6\_VE|1  
AAGCAGTTTAAACCTGCCAAGAAAAGCCCGCCAAAACGTCTGCCAACTTTGGAACCGTTA  
>HPV54\_Alpha\_9628437\_nt133\_E6\_VE|1  
CCGCGTACTCTAGCTGATTTGTGCAAGGTATGCAATATTCCTATGCATAGTTTGCAACTT  
>HPV83\_Alpha\_5059324\_nt32\_E6\_VE|1  
TTTCTGCTGTGCAAAGACTGCGAGGTGGATTTGGAAGACTTACGACTGATTGCAATTTAT  
>HPV58\_Alpha\_222386\_nt141\_E6\_VE|1  
ACATTGCATGATTTGTGTGTCAGGCGTTGGAGACATCTGTGCATGAAATCGAATTGAAATGC  
>HPVcand89\_Alpha\_22095322\_nt362\_E6\_VE|1  
GAGCGATTTCTATAAAATATCTGGAGAGTGGACAGGAAAGTGTGCAACTGCAGGGTAATA  
>HPV52\_Alpha\_397038\_nt163\_E6\_VE|1  
GAATCGGTGCATGAAATAAGGCTGCAGTGTGTGAGTGCAGTGCAAAAAGAGCTACAACGAAGA  
>HPV69\_Alpha\_6970418\_nt403\_E6\_VE|1  
ATAAGGTGTCATAGATGCCAAATACCATTGGGACCGGAAGAAAAACAGAGAATTGTGGAT  
>HPV94\_Alpha\_40804528\_nt304\_E6\_VE|1  
ATTGCACGGCGCCTAAAATATTGGCAATATTCATATTATGTAGAAGGCGTGGAAGAGGAG  
>HPV3\_Alpha\_397005\_nt433\_E6\_VE|1  
AAACCACTGGTAAAGGAAGAGAAGGACAGACACCGCAACGAAAAGCGAAGACTGCACAAA  
>HPV61\_Alpha\_9628574\_nt373\_E6\_VE|1  
CGGTCAATTAGCTGAACATATATACGGTGCCATGCAGCAAACCGTTAAGTATACAG  
>HPV54\_Alpha\_9628437\_nt253\_E6\_VE|1  
GACCTATTTGTGGTGTGGAGACACGGCTTCCACATGCTGCATGTGCACTGTGCCTAGAA  
>HPV19\_Beta\_396940\_nt291\_E6\_VE|1  
ACAATTGCTGGATTAGCAGCATTGCTAGAAATACCGTTGGATGACTGTTTAGTGCCTTGT  
>HPV77\_Alpha\_2911558\_nt223\_E6\_VE|1  
CTGGCAGCATTTACAATTAGAGAATTAAATGTGGTGTGGAGAGGTGGGGCGCCGTACGGT  
>HPVcand62\_Alpha\_39932599\_nt152\_E6\_VE|1  
GTGGTGCGGCGAAAGGACTGGCCATTTGGAGTATGCGCAGCATGCCTATTGAGAGAGATT



>HPV95\_Gamma\_40804520\_nt442\_E6\_VE|1  
GAAAAACTTGACCTGTTATACAGTGGTGAGGTGTGCTATTTAATAAGGGGTTTGTGGAGG  
>HPVcand87\_Alpha\_14475578\_nt328\_E6\_VE|1  
CTTCGTCACCTGGGAGTACTCCAGCTACGGACCCACAGTAGAAGAAGAAACAGGTGTAGCA  
>HPV81\_Alpha\_40804509\_nt493\_E6\_VE|1  
CATAAAATAGCTGGAGAGTGGATGGGAAAGTGC TGCCATTGTAGAGGAGCATGCATGGCC  
>HPV88\_Gamma\_167600365\_nt228\_E6\_VE|1  
AGTTTGGTCTGGAGGAGCGGTGCTTGT TTTGCGTGTGTGTGCCCTTGTCTAGGCTTTCT  
>HPV3\_Alpha\_397005\_nt283\_E6\_VE|1  
GCGCCCTACGGTGCTTGTGCACGGTGT T TACTTGTAGAGGGCATTGCACGACGCCTAAAA  
>HPV60\_Gamma\_9628566\_nt103\_E6\_VE|1  
ATGCAGATGGAAGAAGACAGGTTTCCAACAACAGTGGCTGATTATTGCTCTGAATTTGAT  
>HPV42\_Alpha\_333211\_nt499\_E6\_VE|1  
ATATTGTGTCAGTGGACGGTTCGGTGTACGCATTGCAGAGGACAATGCGTGGAGAGACGC  
>HPV16\_Alpha\_9627100\_nt84\_E6\_VE|1  
ATGCACCAAAAAGAGAACTGCAATGTTTCAGGACCCACAGGAGCGACCCAGAAAGTTACCA  
>HPV43\_Alpha\_40804474\_nt493\_E6\_VE|1  
AGCGTGTGGAAAGGATACTGCCTACATTGCTGGAAATCATGCATGGAAAAAGCCGACGA  
>HPV16\_Alpha\_9627100\_nt474\_E6\_VE|1  
AGATTCCATAATATAAGGGGTTCGGTGGACCGGTTCGATGTATGTCTTGTTCAGATCATCA  
>HPV16\_Alpha\_9627100\_nt444\_E6\_VE|1  
GAAAAGCAAAGACATCTGGACAAAAAGCAAAGATTCCATAATATAAGGGGTTCGGTGGACC  
>HPVcand86\_Alpha\_15741127\_nt212\_E6\_VE|1  
AAGGTACGTGAGCTACGACACTGGGAGCACTCCAGCTACGGATCCACAGTGAACAAGAC  
>HPV61\_Alpha\_9628574\_nt253\_E6\_VE|1  
TGGAGACATAACTGGCCATTTGGAGTATGCGCACCATGCTTGGCACGTGAAGTAAAAGTG  
>HPV3\_Alpha\_397005\_nt403\_E6\_VE|1  
ACACAGCAAATTAGATGCTACATGTGT CACAAACCACTGGTAAAGGAAGAGAAGGACAGA  
>HPV7\_Alpha\_9627389\_nt403\_E6\_VE|1  
ATAAGATGCTGCAAATGCCACAAACCAT TGTCTCCTGTGGAAAAACCAACCACATTGTT  
>HPV11\_Alpha\_333026\_nt103\_E6\_VE|1  
ATGGAAAGTAAAGATGCCTCCACGTCTGCAACATCTATAGACCAGTTGTGCAAGACGTTT  
>HPVRTRX7\_Unclassified\_30315616\_nt595\_E6\_VE|1  
GGTCGAGGCCTTCCGTTCCACAAAGTGAGAGACGGCTGGAAAGGAGTGTGCAGGCACTGT  
>HPV106\_Alpha\_71726710\_nt392\_E6\_VE|1  
CGGCTAATAACAGAAGGCAAACGGTTCCATAAAAATAGCCGGGCACTGGCGAGGCGCTTGC  
>HPV9\_Beta\_9627396\_nt351\_E6\_VE|1  
CACAAGTGTTTACAGCTTATTTGGACAGAGGAGGATTTGGTGTATGGACTCTGTAGTAGC  
>HPV40\_Alpha\_397014\_nt493\_E6\_VE|1  
TCGTGGACAGGGTACTGTCTACATTGCTGGAAGAAATGCATGGAGAAAGGCCAACGCTCG  
>HPV3\_Alpha\_397005\_nt253\_E6\_VE|1  
CGGGAAGTGAATGTGGTGTGGAGAAGGGGAGCGCCCTACGGTGCTTGTGCACGGTGT TTA  
>HPV12\_Beta\_396910\_nt231\_E6\_VE|1  
ACAGACAGTACGCCTGAGCTGCCCACA ACTATTAAGAGTTAGCTGACCTTTTAGATATA  
>HPV90\_Alpha\_22138122\_nt272\_E6\_VE|1  
ACAGGAGTGCCTATTTTAGAATTGCTTATTAGATGCTACCTGTGCCATAAACCACTGTGC  
>HPV63\_Mu\_9626605\_nt133\_E6\_VE|1  
GATCTGAGTTCTGCTCTCCGTATCCCATT TATTGATTTGGTTGTTCCCTTGCAATTTTTGC  
>HPV45\_Alpha\_397022\_nt403\_E6\_VE|1  
TTGTTAATAAGGTGCCTGCGGTGCCAGAAACCAATTGAACCCAGCAGAAAAACGTAGACAC  
>HPV61\_Alpha\_9628574\_nt223\_E6\_VE|1  
GCGTTTGCACATAAAGGAGCTAAGCATTGTGTGGAGACATAACTGGCCATTTGGAGTATGC  
>HPV67\_Alpha\_3228267\_nt133\_E6\_VE|1  
AACCTGCACGAATTGTGTGAAGCTTTGGAAACCACGGTGCATGAAATAAGTTTGGCCCTGC  
>HPV24\_Unclassified\_9628486\_nt561\_E6\_VE|1

GAATTATTTTCATAAAGTGAGGAGGGGCTGGAAAGGACTCTGTAGGCAGTGTAAGCAGATA  
>HPV36\_Beta\_1020218\_nt411\_E6\_VE|1  
TTTGCCTGCTGTCGTGTTTGTGTGGTGCAACAGCCACATATGAGTTTAATCAGTTTTAT  
>HPVcand85\_Alpha\_4574720\_nt136\_E6\_VE|1  
CCCTACAAACTACCAGACCTATGCAACACACTGGACACATCACTGCAAGATATAGAAATA  
>HPV58\_Alpha\_222386\_nt111\_E6\_VE|1  
ATGTTCCAGGACGCAGAGGAGAAACCACGGACATTGCATGATTTGTGTCAGGCGTTGGAG  
>HPV16\_Alpha\_9627100\_nt114\_E6\_VE|1  
GACCCACAGGAGCGACCCAGAAAGTTACCACAGTTATGCACAGAGCTGCAAACAACTATA  
>HPVcand85\_Alpha\_4574720\_nt196\_E6\_VE|1  
AGCTGTGTATATTGTAAAAGCGTCCTGCAGCGAACAGAGGTATATGAATTTGCCTTTGCT  
>HPV69\_Alpha\_6970418\_nt433\_E6\_VE|1  
GGACCGGAAGAAAAACAGAGAATTGTGGATGAAAAGCGACGGTTCCATGAAATAGCAGGG  
>HPV42\_Alpha\_333211\_nt169\_E6\_VE|1  
GAATTTGGGCTGACATTGCGGAATTTACAGATTTTCCTGCATTTGGTGCAAAAAGCACTTA  
>HPV69\_Alpha\_6970418\_nt493\_E6\_VE|1  
TACTGGAAAGGGTTGTGCACAACTGCTGGAGACCAAGGCGGAAGCAACAGAAACACAA  
>HPV71\_Alpha\_12084981\_nt173\_E6\_VE|1  
ACCAAGTACGACGTGGACCTGCAGGACCTGAACCTAACCTGCATATTCTGCAGAACAAATTA  
>HPV41\_Nu\_9626041\_nt493\_E6\_VE|1  
TTGCGGGAAGACTTGTCTGTGCATAGAATTGGCGGGATCTGGAGGGGAAGTTGTGTTTGA  
>HPV72\_Alpha\_1491683\_nt343\_E6\_VE|1  
TCGGGCTACGGACCCACTGTGGAACAGGAAACAGGCAAATCATTAGCAGAACTATATATA  
>HPV56\_Alpha\_397053\_nt133\_E6\_VE|1  
CGTCCACGAAGCCTGCACCACTTGAGTGAGGTATTAGAAATACCTTTAATTGATCTTAGA  
>HPV18\_Alpha\_9626069\_nt136\_E6\_VE|1  
CCCTACAAGCTACCTGATCTGTGCACGGAAGTGAACACTTCACTGCAAGACATAGAAATA  
>HPV48\_Gamma\_9628542\_nt463\_E6\_VE|1  
GATTTTCTGTTAATTCGCGGGACTTGGAGAGGTGTTTGTAGAAATTGTATCAGCCATGAG  
>HPV39\_Alpha\_333245\_nt198\_E6\_VE|1  
GCCTGTGTCTATTGCAGACGACCACTACAGCAAACCGAGGTATATGAATTTGCATTTAGT  
>HPV68a\_Alpha\_71726685\_nt122\_E6\_VE|1  
CGGACAGAGGTATATGAATTTGCCTTTAGTGACCTATGTGTAGTGTATAGAGACGGGGTA  
>HPV65\_Gamma\_312100\_nt463\_E6\_VE|1  
GCCTGCTACTTAATAAGGGGTTTGTGGAGGGGCTATTGCAGAAATTGCATTAGGAAACAA  
>HPVRTRX7\_Unclassified\_30315616\_nt565\_E6\_VE|1  
TTGAGCACCATTTGAAAAATTAGATAGCTGTGGTCGAGGCCTTCCGTTCCACAAAGTGAGA  
>HPV36\_Beta\_1020218\_nt591\_E6\_VE|1  
GGAAGAGGACTTCCCTTTTCATAGAGTCAGAAACGCCTGGAAGGGAATCTGTAGGCAGTGT  
>HPV19\_Beta\_396940\_nt261\_E6\_VE|1  
CCACAGGTACAGAGCCACCATTACCAGCAACAATTGCTGGATTAGCAGCATTTGCTAGAA  
>HPV96\_Beta\_50253426\_nt180\_E6\_VE|1  
CCAAAACGTCTGCCAACTTTGGAACCGTTAACGGTAAGTTTCGCAACTCTCTCGGTTGCC  
>HPV52\_Alpha\_397038\_nt133\_E6\_VE|1  
ACCCTGCACGAATTGTGTGAGGTGCTGGAAGAATCGGTGCATGAAATAAGGCTGCAGTGT  
>HPV59\_Alpha\_557236\_nt56\_E6\_VE|1  
ATGGCACGCTTTGAGGATCCTACACAACGACCATACAAACCTGCCTGATTTGAGCACAAACA  
>HPV53\_Alpha\_9627377\_nt433\_E6\_VE|1  
CAACATCCGTTGACACCAGAGGAAAAACAGTTACACTGTGACTATAAGAAACGGTTTCAC  
>HPV83\_Alpha\_5059324\_nt92\_E6\_VE|1  
TGCACAAATGAATTAACAACAGCAGAAGTGCTGCTTTGCATGGAAGGAGCTGTGTATT  
>HPV77\_Alpha\_2911558\_nt373\_E6\_VE|1  
ACAAAAGAATCCATAGATACCCAGCAAATCAGATGCTACATGTGTACAAAACCACTCACC  
>HPV15\_Beta\_396924\_nt561\_E6\_VE|1  
GAGCAATTCCACAAGGTTAGACGCAATTGGAAAGGATTGTGTAGACATTGTAGGGCGATA

>HPV43\_Alpha\_40804474\_nt373\_E6\_VE|1  
GAAGAACTAAGCAAACAGTGTGTTGATTGTGCATTAGATGCTGTAAGTGCCACAAGCCA  
>HPV61\_Alpha\_9628574\_nt343\_E6\_VE|1  
TACGGACCCACTGTGGAACAGACAACAGGACGGTCATTAGCTGAACTATATATACGGTGC  
>HPVcand86\_Alpha\_15741127\_nt272\_E6\_VE|1  
ACAGGCGTATCATTTGGCACACTTAAATATAAGGTGCCATGCGTGCTTTAAACCATTGTGC  
>HPV6\_Alpha\_6002612\_nt104\_E6\_VE|1  
ATGGAAAAGTGCAAATGCCTCCACGTCTGCAACGACCATAGACCAGTTGTGCAAGACGTTT  
>HPV47\_Beta\_333062\_nt509\_E6\_VE|1  
GCTACAGGCCTTTCCATTTTTGAGATTGACATAAGGTGTCATACCTGCCTGTCATTTCTT  
>HPV34\_Alpha\_9627334\_nt463\_E6\_VE|1  
GATGAAAACAAACGGTTTCACCAAATAGCGGATCAGTGGACCGGACGCTGTACACAGTGC  
>HPV76\_Beta\_2911551\_nt201\_E6\_VE|1  
ATGGCTAGACCTGCTAAGGTATGTGAGCTTAGCCAACTCTTAAATATACCCATTTCTTCT  
>HPV1\_Mu\_9626063\_nt255\_E6\_VE|1  
AGAGACAATTTGGTGTGTTGGATGCTGTCAAGGGTGTGCTAGAACTGTTAGCCTATTGGAG  
>HPV106\_Alpha\_71726710\_nt272\_E6\_VE|1  
AGATACTGGGACTACTCCAGCTATGCACCCACAGTGGAGTATGAAACAGGGATACCAATA  
>HPV5\_Beta\_9627145\_nt591\_E6\_VE|1  
GGCAGAGGCCTTCCCTTTTCATAAGGTGAGGAACGCCTGGAAGGGAATCTGTAGGCAGTGT  
>HPV16\_Alpha\_9627100\_nt204\_E6\_VE|1  
AAGCAACAGTTACTGCGACGTGAGGTATATGACTTTTGCTTTTCGGGATTTATGCATAGTA  
>HPV18\_Alpha\_9626069\_nt106\_E6\_VE|1  
ATGGCGCGCTTTGAGGATCCAACACGGCGACCCTACAAGCTACCTGATCTGTGCACGGAA  
>HPV93\_Beta\_37089393\_nt106\_E6\_VE|1  
ATGGTATATAAGGCAGACATCTTAATGGCGGCAGTAAGTAAACCTCAGACCATTACAGAG  
>HPV88\_Gamma\_167600365\_nt438\_E6\_VE|1  
AGGGGTGAGTGTTTCCATCTTGTGAGAAACACTTGGAGGGGAACGTGCAGAAATTGTTGT  
>HPV26\_Alpha\_9627305\_nt458\_E6\_VE|1  
GAAAAGCGACGATTTTCAGAAATAGCAGGGCAGTGGAAAGGGTTGTGTACAAATTGTTGG  
>HPV38\_Beta\_1020234\_nt231\_E6\_VE|1  
CAGCTCAGTGATAAGTTAACAGTTCCTGTAGAGGATCTGTTATTACCCTGTAGATTCTGC  
>HPV21\_Beta\_1020170\_nt291\_E6\_VE|1  
CCACCATTACCAGCTACAATTTCGTGACCTAGCCAATCTGTTAGAGATACCATTGGATGAT  
>HPV65\_Gamma\_312100\_nt433\_E6\_VE|1  
GAGAAATTAGACTTGCTGTACTCTGACCAGGCCTGCTACTTAATAAGGGGTTTGTGGAGG  
>HPV10\_Alpha\_9627257\_nt253\_E6\_VE|1  
TTGGTGTGGAGAGCGGGAGTGCCATACGGTGCCCTGTGCACGGTGTGTTACTCCTACAGGGC  
>HPV72\_Alpha\_1491683\_nt373\_E6\_VE|1  
ACAGGCAAATCATTAGCAGAACTATATATAAGGTGCCATGCATGCTGCAAACCCCTAAGC  
>HPV52\_Alpha\_397038\_nt463\_E6\_VE|1  
GCAAACAAGCGATTTTCATAATATTATGGGTCGTTGGACAGGGCGCTGTTTCAGAGTGTGG  
>HPV73\_Alpha\_1491692\_nt103\_E6\_VE|1  
ATGCTGTTTCCCAATTCAGAAGAACGACCATACAAGCTACAAGCGTTATGTGACGAAGTG  
>HPV39\_Alpha\_333245\_nt468\_E6\_VE|1  
CTAAATAGCAAACGAAGATTTTCATAAAATAGCAGGAAGCTATACAGGACAGTGTGACGG  
>HPV25\_Beta\_396948\_nt411\_E6\_VE|1  
GAATATCTTGTGTATGCCTGCTGCTGCTGTTGTTGCACAGCAACTGCCACATTTGAATTT  
>HPV68a\_Alpha\_71726685\_nt92\_E6\_VE|1  
GACTGTGTCTATTGCAGAAGGCAACTACAACGGACAGAGGTATATGAATTTGCCTTTAGT  
>HPV32\_Alpha\_9627327\_nt343\_E6\_VE|1  
GACAGATCAGCATTTTGGCATACAGTAGAACAAAGAAACAGGACTACTGTTGGAAGAACAA  
>HPV12\_Beta\_396910\_nt531\_E6\_VE|1  
AGGTGTCAGACGTGCTTGTGATTTTTAGATACAATTGAAAAGTTAGACAGCTGTGGTTCGG  
>HPV14D\_Beta\_396918\_nt207\_E6\_VE|1

CTGACTCTTCAACAGACAGTGCAGATGAAGGTCCTTCTCCTAAGAGTAACTATTGTGATA  
>HPVcand87\_Alpha\_14475578\_nt208\_E6\_VE|1  
GAATTAACAGAAAAGCGAATTGCTGGCGTTTGCATTAAGGGAATTATTGCTGGTGTGGAGA  
>HPV88\_Gamma\_167600365\_nt258\_E6\_VE|1  
GCGTGTGTGTCCCTTGTCTAGGCTTTCTGCTAGGTATGAGGCTGAACGCTTTTACCGC  
>HPV68a\_Alpha\_71726685\_nt302\_E6\_VE|1  
TTATTGATAAGGTGCATGAGTTGCCTGAAACCATTGTGTCCAGCAGAAAACTAAGGCAC  
>HPV110\_Beta\_186461194\_nt323\_E6\_VE|1  
TGGACTGAGGAAGATTTTGTTCATGCTGTAGTAGTTGTGCTCATGCTACAGCGCAA  
>HPV102\_Alpha\_71726718\_nt212\_E6\_VE|1  
GTGCGGGAAGTACGGCACTGGAAGTACTCCAGCTACGGCGCAACGGTTGAAGAAGAAACC  
>HPV12\_Beta\_396910\_nt591\_E6\_VE|1  
GGCCTTCCGTTCCACAAGGTTAGAGACAGGTGGAAGGGAATTTGCAGACAGTGCAAGCAT  
>HPV82\_Alpha\_6970427\_nt403\_E6\_VE|1  
ATAAGGTGTCATAGATGTCAGAGACCACTTGGGCCTGAAGAAAAGCAAAAGGTGGTGGAC  
>HPV29\_Alpha\_1020210\_nt463\_E6\_VE|1  
AAGCGAAGACTACACAAAATTTCTGGATACTGGAGAGGGAGTTGCCTGTATTGTTGGTCA  
>HPV8\_Beta\_333074\_nt272\_E6\_VE|1  
GCGGCTTTAGGTATTCCATTGCAGGACTGTTAGTACCGTGCAACTTTTGTGGTAACTTT  
>HPV7\_Alpha\_9627389\_nt493\_E6\_VE|1  
TCGTGGACAGGGTACTGTCTGCACTGTTGGAAGAAATGCATGGAGAAAGGCCAACGCTCG  
>HPV37\_Beta\_1020226\_nt531\_E6\_VE|1  
TTAGAGAAAGTTGGAGACTTGCTATACTCAGCAACAATTTCAAGGTTAGGCGCAATTGG  
>HPV74\_Alpha\_27462483\_nt2\_E6\_VE|1  
ATGGAAAGTGCAAATGCCTCCACGTCTGCAAAAAGTATAGACCAGTTGTGCAAGGACTGC  
>HPV92\_Beta\_27531786\_nt437\_E6\_VE|1  
AAATTGGCAGTTTGTGCATCAGGCATTCCTTTTGATAGAGTTAGAGGAGCTTGAAGGCA  
>HPV34\_Alpha\_9627334\_nt403\_E6\_VE|1  
TTAATAAGGTGCGGAAAATGCCAAAACCACTGTGTCCATTGGAAGCAAGGCATGTA  
>HPV56\_Alpha\_397053\_nt433\_E6\_VE|1  
AGTCCGTTAACTCCGGAGGAAAAGCAATTGCATTGTGACAGAAAAAGACGATTTTCATCTA  
>HPV39\_Alpha\_333245\_nt138\_E6\_VE|1  
CCATACAAATTGCCAGACCTGTGCACAACGCTGGACACCACCTTGCAGGACATTACAATA  
>HPV49\_Beta\_9627363\_nt201\_E6\_VE|1  
ATGGCTAGACCTGTTAAGGTATGTGAGCTAGCCCACCACTTAAATATACCTATTTGGGAA  
>HPV25\_Beta\_396948\_nt291\_E6\_VE|1  
GCAGCTTTATTGGAATTCATTAGATGATTGCTTAGTACCTTGCAACTTCTGTGGCAAC  
>HPVcand85\_Alpha\_4574720\_nt166\_E6\_VE|1  
CTGGACACATCACTGCAAGATATAGAAATAAGCTGTGTATATTGTAAAAAGCGTCCTGCAG  
>HPV22\_Beta\_1020178\_nt450\_E6\_VE|1  
TATCAAGTTACTTTGTATGGTTCGTGAAATTGAGCAAGAAGAACAACGACCTGTAGGCCAA  
>HPVcand87\_Alpha\_14475578\_nt478\_E6\_VE|1  
CACAAAATAGCTGGGAAGTGGACAGGAAAGTGCAGCAACTGTAGGGCAATATGCATGGCC  
>HPV58\_Alpha\_222386\_nt471\_E6\_VE|1  
TTAAACAAAAGGTTTCATAATATTTCCGGTCGTTGGACAGGGCGCTGTGCAGTGTGTTGG  
>HPV65\_Gamma\_312100\_nt253\_E6\_VE|1  
TTCAGGGGGGTTGCTACTATGCATGCTGTCTGAATGCTTACGTTTAAGTGCAAGATTT  
>HPV42\_Alpha\_333211\_nt109\_E6\_VE|1  
GGCAGAATGTCAGGTACATCTGCCTCATCACAGCCACGCACATTATACCAATTGTGTAAG  
>HPV63\_Mu\_9626605\_nt103\_E6\_VE|1  
ATGGACCTGACATCTGTACATTGCGTTCCGGATCTGAGTTCTGCTCTCCGTATCCCATTT  
>HPV56\_Alpha\_397053\_nt463\_E6\_VE|1  
CATTGTGACAGAAAAAGACGATTTTCATCTAATAGCACATGGTTGGACCGGGTCATGTTTG  
>HPV36\_Beta\_1020218\_nt381\_E6\_VE|1  
CTTAGTTTAATTTGGAAGGATTACTGTGTATTTGCCTGCTGTGCTGTTTGTGTTGGTGCA

>HPV71\_Alpha\_12084981\_nt503\_E6\_VE|1  
TAGCAGGCCATTGGCGCGGTGCTTGCTTACAGTGTGGAAACCATGCGAGGCCAACAATG  
>HPV80\_Beta\_2911565\_nt561\_E6\_VE|1  
CAGCAATTCCATAAGGTAAGGCGCAATTGGAAAGGATTGTGTAGACATTGTGGGTCGATA  
>HPV9\_Beta\_9627396\_nt381\_E6\_VE|1  
GAGGATTTGGTGTATGGACTCTGTAGTAGCTGTGCTTATGCGTCTGCACAGTTAGAATTT  
>HPV81\_Alpha\_40804509\_nt283\_E6\_VE|1  
AAGAACTGGCCATTTGGAGTATGCGCAGCGTGCTTGTGCAGAGAAGCTAAAGTACGGGAG  
>HPV81\_Alpha\_40804509\_nt163\_E6\_VE|1  
TGTAAGGAGTGTGAAGTGGACCTAGACGACCTGCAACTGACCTGCATATTTTGCAAAAAG  
>HPV8\_Beta\_333074\_nt542\_E6\_VE|1  
TTGTCATTTTTGGATATCATAGAGAAATTAGATTGCTGTGGGAGAGGCCGTCCTTTTCAT  
>HPV76\_Beta\_2911551\_nt531\_E6\_VE|1  
CTTGATCATTTGTGCACAGCAAAGAGAGTTTCACAAAGTTAGAAATAGGTGGAAAGGGGTG  
>HPV59\_Alpha\_557236\_nt326\_E6\_VE|1  
GAGGCTGAAACCAAGACACCGTTACATGAGCTGCTGATACGCTGTTATAGATGCCTAAAA  
>HPV39\_Alpha\_333245\_nt108\_E6\_VE|1  
ATGGCGCGATTTACAAATCCTGCAGAACGCCATACAAATTGCCAGACCTGTGCACAACG  
>HPV53\_Alpha\_9627377\_nt193\_E6\_VE|1  
CAACTTGGCTGTGTGTTCTGCAAGAAGGCATTGACAGCGTCAGAGGTATATAATTTTGCA  
>HPV59\_Alpha\_557236\_nt296\_E6\_VE|1  
TATAGAGATTCCGTGTATGGAGAAACATTAGAGGCTGAAACCAAGACACCGTTACATGAG  
>HPV84\_Alpha\_12958167\_nt92\_E6\_VE|1  
TTTTGCAAGGAAGAATTAACGGAAGGCGAAGTGCTGGCCTTTGCAGTAAAGGAATTACTA  
>HPV97\_Alpha\_71726694\_nt362\_E6\_VE|1  
CTTAAAGACAAACGACGATTCCACCACATATCTGGTTATTATAGAGGCCAGTGCAATTCTG  
>HPV102\_Alpha\_71726718\_nt272\_E6\_VE|1  
CGCACAGCATTACCACAGCTGTATATGAGATGCTATATGTGCCTGAAGCCGTTGTGTAGT  
>HPV10\_Alpha\_9627257\_nt373\_E6\_VE|1  
ACCAAACAATCTATATATACACAGCTGATCAGATGCTACATGTGTCAAAACCGCTGGTA  
>HPV26\_Alpha\_9627305\_nt488\_E6\_VE|1  
CAGTGGAAGGGTTGTGTACAAATTGTTGGAGACCAAGGCGCCAAACAGAAACACAAGTG  
>HPV97\_Alpha\_71726694\_nt32\_E6\_VE|1  
CCCTACAAGTTGCCAGACCTGTGCACAGAATTGAATACTTCATTACCTGAAATAGAGATA  
>HPV107\_Beta\_126131393\_nt320\_E6\_VE|1  
CAGCTTACACAGCATCTTAATATACCAGTGGAAGACTTACTGGTACCTTGCAAATTTTGC  
>HPV26\_Alpha\_9627305\_nt98\_E6\_VE|1  
ATGTTTCGAGGATCCTAGAGAACGACCCAGAACGCTACATGAGCTATGTGAAAGCTTGAAT  
>HPV97\_Alpha\_71726694\_nt392\_E6\_VE|1  
TCTGGTTATTATAGAGGCCAGTGCAATTCGTGTTACAACCAATCACGGCAAGAAAGGCTT  
>HPV67\_Alpha\_3228267\_nt463\_E6\_VE|1  
CGCAAAAAGCGATTTTCATAATATTTCCAATCGTTGGACAGGACGGTGTTCAGTGTGTTGG  
>HPV23\_Beta\_1020186\_nt471\_E6\_VE|1  
CAATTTTATCAGCTAACTGTGTATGGTCGTGAAATTGAGCAGGAGGAGCAACGACCTATA  
>HPV5\_Beta\_9627145\_nt561\_E6\_VE|1  
CTTGACATTATAGAAAAGTTAGATTGCTGTGGCAGAGGCCTTCCCTTTCATAAGGTGAGG  
>HPV92\_Beta\_27531786\_nt257\_E6\_VE|1  
GAGAATTATGCTTATGCTTGCTGTGGTGCTGTGCTAAACAAGTAGCAGCAATAGAAACA  
>HPV83\_Alpha\_5059324\_nt212\_E6\_VE|1  
GTGCGAGAGCTACGGCACTGGAGCCACTCAAGCTACGGGGCAACAGTAGAAGAAGAAACA  
>HPV12\_Beta\_396910\_nt561\_E6\_VE|1  
ACAATTGAAAAGTTAGACAGCTGTGGTCGGGGCCTTCCGTTCCACAAGGTTAGAGACAGG  
>HPVcand86\_Alpha\_15741127\_nt362\_E6\_VE|1  
AATCTGCATTTTCATAAAATAGCAGGCCAGTGGACGGGAAAGTGCAGCAACTGTAGAGCA  
>HPV15\_Beta\_396924\_nt351\_E6\_VE|1

TGGACTGAGGAAGATTTTGTGTTTTGCCTGTTGTTCTAGTTGTGCATTTGCTACAGCGCAG  
>HPV32\_Alpha\_9627327\_nt133\_E6\_VE|1  
AGTACATTATACCAATTGTGCAAAGATTTTGGGCTGACCCTGCGGAATTTACAAATCTGC  
>HPV30\_Alpha\_396973\_nt433\_E6\_VE|1  
CAGCCGTTGACACCAGAGGAAAAACAGTTACACTGTGAATATAAGAAACGGTTTCACAGA  
>HPV77\_Alpha\_2911558\_nt133\_E6\_VE|1  
ATATTCTGTGTGCAGAGACAGTGGAATACCGTTCGACGACCTTCGCCTACTGTGTGTG  
>HPV73\_Alpha\_1491692\_nt463\_E6\_VE|1  
GATGAAAAAAAAACGGTTTCATCAAATAGCAGAACAGTGGACCGGACGCTGTACACGGTGC  
>HPV94\_Alpha\_40804528\_nt424\_E6\_VE|1  
AAGGAAGAAAAGGACAGACATCGTAACGAACGGCGACGACTGCACAAAATATCAGGGTAC  
>HPV45\_Alpha\_397022\_nt433\_E6\_VE|1  
CCATTGAACCCAGCAGAAAAACGTAGACACCTTAAGGACAAACGAAGATTTACAGCATA  
>HPV97\_Alpha\_71726694\_nt2\_E6\_VE|1  
ATGGCGCGATTTGAAGATCCAAGCAAACGGCCCTACAAGTTGCCAGACCTGTGCACAGAA  
>HPVcand89\_Alpha\_22095322\_nt272\_E6\_VE|1  
AACACACCGTTGGCCCAGCTGTATATGAGATGCTATATATGCTGTAAGCCGTTAGGCAGC  
>HPV8\_Beta\_333074\_nt572\_E6\_VE|1  
GATTGCTGTGGGAGAGGCCGTCCCTTTCATAAAAGTTAGAGGAGGCTGGAAAGGAGTTTGC  
>HPV61\_Alpha\_9628574\_nt463\_E6\_VE|1  
CACTTCCACTATATAGCTGGACAGTGGACGGGAAGGTGTTGCCAGTGTAGAGGGCCATGC  
>HPV71\_Alpha\_12084981\_nt473\_E6\_VE|1  
TAATTACAGAAGGCAGGCGATTTTCATAAAATAGCAGGCCATTGGCGCGGTGCTTGCCTAC  
>HPV2\_Alpha\_9626032\_nt390\_E6\_VE|1  
ATACCTCAGCTGTTTATGAGATGCTATATTTGCCATAAGCCCCTGAGCTGGGAGGAGAAG  
>HPV107\_Beta\_126131393\_nt650\_E6\_VE|1  
CAGTTTTTTAAGGTGAGAGGTAATTGGAAGGGATTGTGTAGACATTGTGAGGCGATAGAA  
>HPV72\_Alpha\_1491683\_nt463\_E6\_VE|1  
GGAATCCACTTCCACAAGATAAGCGGACTGTGGACGGGAAGGTGCTGCCAGTGTAGAGGG  
>HPV69\_Alpha\_6970418\_nt463\_E6\_VE|1  
GAAAAGCGACGGTTCATGAAATAGCAGGGTACTGGAAAGGGTTGTGCACAAACTGCTGG  
>HPV17\_Beta\_396932\_nt561\_E6\_VE|1  
CAGCAGTTTCATAAGGTTAGACGCAATTGGAAAGGCTTGTGCAGACATTGTGGGTCGATA  
>HPV38\_Beta\_1020234\_nt351\_E6\_VE|1  
TGGACTCAAGAGGATTTTGTGTTTTGCATGTTGTAGCAGTTGTGCTTATGCTTCTGCTCAA  
>HPV59\_Alpha\_557236\_nt476\_E6\_VE|1  
TGTCGGACCCGAGCAAGACACCTAAGACAGCAACGACAAGCGCGTAGTGAAACACTGGTG  
>HPV68a\_Alpha\_71726685\_nt2\_E6\_VE|1  
ATGGCGCTATTTCCACAACCCTGAGGAACGGCCATACAAATTGCCAGACCTGTGCAGGACA  
>HPVcand87\_Alpha\_14475578\_nt388\_E6\_VE|1  
TTGGCACTTCAAAATATAAGGTGCCATGCATGCTGCAAACCATTGTGCTGGCCCGAGAAG  
>HPV72\_Alpha\_1491683\_nt253\_E6\_VE|1  
ATTGTGTGGCGGGACAACCTGGCCATTTGGAGTCTGCGCACCATGCCTTGCAAGAGCAACT  
>HPV84\_Alpha\_12958167\_nt2\_E6\_VE|1  
ATGCCCCAACGGACGCTACCACCCCACCAATATTTTTGTGCTGTGCCAGGAATACGAGGTG  
>HPVcand62\_Alpha\_39932599\_nt362\_E6\_VE|1  
GGAGTGCCTTCCACAAAATAGCAGGAGTGTGGACAGGACGGTACCGCAATTGTAGAGGA  
>HPV82\_Alpha\_6970427\_nt133\_E6\_VE\_rc|1  
ACACAATACCTGAATATTGTGCATAGACGTATTGCAGGCTTCACATAATTCGTGCAGCGT  
>HPV106\_Alpha\_71726710\_nt242\_E6\_VE\_rc|1  
GGGTGCATAGCTGGAGTAGTCCAGTATCTAAATTGTCTAAGTTTTCCAGCTGCTTTCAG  
>HPV35\_Alpha\_333050\_nt111\_E6\_VE\_rc|1  
TTCTACCTCGTTGCACAAATCATGCAGTTTGTAAAGGTCGTTACAGCTGGGTCCTGAAACAT  
>HPV92\_Beta\_27531786\_nt107\_E6\_VE\_rc|1  
GTCCTCCAATGGAATATCTAACTGTCTTCTAAGTTCCTGCACCGAAGGAGGTTTTGCCAT

>HPV43\_Alpha\_40804474\_nt223\_E6\_VE\_rc|1  
CGGATATCCGTCGCGCCACACAACCTTTAAATCTCTAAATGCAAACGATAATACTTCCGT  
>HPV40\_Alpha\_397014\_nt343\_E6\_VE\_rc|1  
CCTTACTTGTAATAATGGTTAATCCTGTCTCTTCTTCCACGGTTGGTGCATAGGCTGCGTA  
>HPVcand87\_Alpha\_14475578\_nt448\_E6\_VE\_rc|1  
CTTTCCTGTCCACTTCCCAGCTATTTTGTGGAAGTGCAGATTTCGCGTGTATCATATGCTC  
>HPV70\_Alpha\_1173493\_nt108\_E6\_VE\_rc|1  
CGCCGTGCACAGGTCAGGCAATTTGTATGGCCGTTCTGCAGGATTGGGAAATCGCGCCAT  
>HPV90\_Alpha\_22138122\_nt32\_E6\_VE\_rc|1  
CACGCAGGTTATGTTTCAGGTCCTGCAGGTCCAGTTCATAGACTTTGCACAATAGGAAGAT  
>HPV38\_Beta\_1020234\_nt561\_E6\_VE\_rc|1  
TATTGCTTTGCAATGCCTGCACCTTCCTTTCCAATTGCCTCTAACCTTGTGAAATGCTTG  
>HPV91\_Alpha\_22023568\_nt332\_E6\_VE\_rc|1  
ATAAAATTTTAAGCAGGCCAAACACGCTGCAAACGGATAACTGTGCGCCACACAACCTT  
>HPV51\_Alpha\_333087\_nt398\_E6\_VE\_rc|1  
GTCCACCAATTTTTGCTTTTCTTCAGGCCCAAGTGGTCTTTGACATCTATGACACCTTAT  
>HPV45\_Alpha\_397022\_nt103\_E6\_VE\_rc|1  
TTCTGTGCACAAATCTGGTAGCTTGTAGGGTCGTTGCTTTGGATCGTCAAAGCGCGCCAT  
>HPV40\_Alpha\_397014\_nt403\_E6\_VE\_rc|1  
TACAATATGGTTGGTTTTTTCACGGGAGACAAAGGCTTGTGGCACTTGCAGCATCTAAT  
>HPV20\_Beta\_1020162\_nt441\_E6\_VE\_rc|1  
AAATTGATTAAACTCATATGTCGCTGTTGCCGAGCAGCAAACACGACAGCATGCAAAAAC  
>HPV8\_Beta\_333074\_nt602\_E6\_VE\_rc|1  
CCAATCATGATACAAATGCTTACAAAGCCTGCAAACCTCTTTCCAGCCTCCTCTAACTTT  
>HPV32\_Alpha\_9627327\_nt163\_E6\_VE\_rc|1  
ACTGGTTAAGTGGTTTTTACACCAAATACAGCAGATTTGTAAATTCCGCAGGGTCAGCCC  
>HPV33\_Alpha\_333049\_nt110\_E6\_VE\_rc|1  
CTCCAATGCTTGGCACAAATCATGCAATGTTTCGTGGTTTTTTCCTCAGTGTCTTGAAACAT  
>HPV34\_Alpha\_9627334\_nt433\_E6\_VE\_rc|1  
CGCTATTTGGTGAAACCGTTTGTTCATCTACATGCCTTTGCTTTTCCAATGGACACAG  
>HPV82\_Alpha\_6970427\_nt433\_E6\_VE\_rc|1  
TCCCGCTATTTTCATGAAACCTTTTTTTGTGTCGTCACCACCTTTTGCTTTTCTTCAGGCCC  
>HPV47\_Beta\_333062\_nt479\_E6\_VE\_rc|1  
GTCAATCTCAAAAATGGAAAGGCCTGTAGCTAGCTCAATATCTCTACCTAACACTGTTTG  
>HPV94\_Alpha\_40804528\_nt244\_E6\_VE\_rc|1  
GCCCTGCAGAAAGTAAACACCGGGCACAGGCACCGTATGGCACTCCCGCTTTCCACACCAA  
>HPV59\_Alpha\_557236\_nt446\_E6\_VE\_rc|1  
CTGTCTTAGGTGTCTTGCTCGGGTCCGACACCCACGACACTGTCTGTATATATTCAGC  
>HPV44\_Alpha\_1020242\_nt106\_E6\_VE\_rc|1  
GCACTCCTTGACAACTGGTCTATACTTTGTGCAGACGTGGAGGCATTTGCACCTTCCAT  
>HPV93\_Beta\_37089393\_nt466\_E6\_VE\_rc|1  
TCCTTTCCAGCCCCTCCTCACTTTGTAAACAATAGAGATCTACCACAGATATCAAGCTT  
>HPV20\_Beta\_1020162\_nt201\_E6\_VE\_rc|1  
CTCTCCAATATTAGATGGTCCTTCATCAGCGCTGTCTTCTGAAGAAGGAGGTGTAGCCAT  
>HPV38\_Beta\_1020234\_nt261\_E6\_VE\_rc|1  
ACGTAATTCAATGTACGTGAGGAACTGTTGCAGAATCTACAGGGTAATAACAGATCCTC  
>HPV27\_Alpha\_396964\_nt400\_E6\_VE\_rc|1  
CTTCTCCTCCCAGCTCAGGGGCTTATGGCAGATATAGCATCTCATAAACAGCTGAGGTAT  
>HPV41\_Nu\_9626041\_nt343\_E6\_VE\_rc|1  
CAGACGGCTGGCTGCACAAGACACTTCGTGCCGTGCAGTGAACCTCCAGCCTTGCAAGCAC  
>HPV54\_Alpha\_9628437\_nt433\_E6\_VE\_rc|1  
AACACAGTGGAATCGCCTGTTGTAATCTACGTGCCGTTGCTTTTCCACGTTGCACAAAGG  
>HPV15\_Beta\_396924\_nt201\_E6\_VE\_rc|1  
TAAAGGTATACACAGAGTGTCTGCAAGCTGCTGCACAGAAAAAGGCTTTGGCCTATCCAT  
>HPV96\_Beta\_50253426\_nt210\_E6\_VE\_rc|1

TTGCCAACAACTCTCAAGATAAACTTTTGGCAACCGAGAGAGTTGCGAAACTTACCGT  
>HPV10\_Alpha\_9627257\_nt403\_E6\_VE\_rc|1  
TTCGTTACGATGTCTGTCTTTTTCTTCCCTTACCAGCGGTTTGTGACACATGTAGCATCT  
>HPV5\_Beta\_9627145\_nt381\_E6\_VE\_rc|1  
GGCGCCACAGCATACGCGACAGCAGCAAACACACAATAATCTTTCCAAATTAGACTAAG  
>HPV41\_Nu\_9626041\_nt373\_E6\_VE\_rc|1  
GTCGCTGAGGCTCTGTCTTATAAAAGTGCAGCAGCGCTGGCTGCACAAGACACTTCGTG  
>HPV7\_Alpha\_9627389\_nt223\_E6\_VE\_rc|1  
AAAAGGAAAAGTCGTTGCGCCACACTACATATAACTCTCTAAATGCAAAGGCCAGCACCTC  
>HPV95\_Gamma\_40804520\_nt112\_E6\_VE\_rc|1  
AAAAGAAATGTCAAATCTCCTGCAGTACTCGTCCAAGGTTGTAGGTCTGCCATTTGCCAT  
>HPV72\_Alpha\_1491683\_nt403\_E6\_VE\_rc|1  
TGTCTGCACCTGATATTCCTTTTCCTGCAGCTTAGGGGTTTGCAGCATGCATGGCACCT  
>HPV67\_Alpha\_3228267\_nt163\_E6\_VE\_rc|1  
GTTTCTGTCCAAAGTTTTTTTGCAGTGCACGCAGGGCAAACCTTATTTTCATGCACCGTGGT  
>HPV90\_Alpha\_22138122\_nt302\_E6\_VE\_rc|1  
TTCAGTATAAGCCGTTTCCTTTTCCTCACTGCACAGTGGTTTATGGCACAGGTAGCATCT  
>HPV28\_Alpha\_1020202\_nt343\_E6\_VE\_rc|1  
GCATCTCACTTGCTGTGTATCTATAGATTGTTTTGTCTCCTCTTCCACGCCTTCCACATA  
>HPV11\_Alpha\_333026\_nt493\_E6\_VE\_rc|1  
GGGTAACAAGTCTTCCATGCATGTTGTCCAGCAGTGTAAAGCAACGACCCCTCCACTGGTT  
>HPV80\_Beta\_2911565\_nt351\_E6\_VE\_rc|1  
TTGTGCAGTAGCAAAAGCACAACTGCTACAACAAGCAAAGACAAAGTCTTCTTCAGTCCA  
>HPV68a\_Alpha\_71726685\_nt32\_E6\_VE\_rc|1  
TATTGTAAACGTCATGCAATGTAGTGTCCAATGTCCTGCACAGGTCTGGCAATTTGTATGG  
>HPV6\_Alpha\_6002612\_nt494\_E6\_VE\_rc|1  
GGGTAACATGTCTTCCATGCATGTTGTCCAGCAGTGTAGGCAGCGACCCCTCCACGTACA  
>HPV63\_Mu\_9626605\_nt253\_E6\_VE\_rc|1  
AAGCAGACTAACATGCCTAGCACAGCACTGACAACAAGCAAACACGAAATTATCTCGCCA  
>HPV43\_Alpha\_40804474\_nt133\_E6\_VE\_rc|1  
CCCAATTTGCAGAGTAGGCAAAGTTATGTTACACTCATCACACAACCTCAAATATAGTCCG  
>HPV34\_Alpha\_9627334\_nt103\_E6\_VE\_rc|1  
GACCTCTTCACATAAGGCTGGTAGCTTGATGGCCGTTTCCTCAGGATTGGGAAAAAACAT  
>HPV69\_Alpha\_6970418\_nt313\_E6\_VE\_rc|1  
CGCTTCCAGTGTGTCACCATACACAGACGATGTGTAGCGTCTATATTCTATTATTTTTGA  
>HPV51\_Alpha\_333087\_nt98\_E6\_VE\_rc|1  
GTTCAAAGCTTCACATAATTCATGCAGCGTTCGTGGTCTTTCCCTCTTGTCTTCGAACAT  
>HPV29\_Alpha\_1020210\_nt373\_E6\_VE\_rc|1  
GACAAGTGGCTTGTGGCACATGTAGCAGCGAATTAGCTGTGTATATATGGACTCGTTTGT  
>HPV102\_Alpha\_71726718\_nt32\_E6\_VE\_rc|1  
ATAAATGCAAAGCAGTCGTAAGTCCTCCAAATCCACTTCACATTCTTTGCACAGCACAAA  
>HPV23\_Beta\_1020186\_nt261\_E6\_VE\_rc|1  
CAAGAGATCTACCACTGGTACTGTCAACTTATCACTAAGTTGCTGTACCGTCAGTGGTCG  
>HPV84\_Alpha\_12958167\_nt272\_E6\_VE\_rc|1  
GCACAATGGCTTGCAGCACGCGTGGCACCTTATATTTATTTGTGCAAGTGGTAATCCTGT  
>HPV71\_Alpha\_12084981\_nt263\_E6\_VE\_rc|1  
CCAAACAGCAGGCACATGCAGCAAACGGAAACCACTTCTCCACACAACCTTTCAGCTCCT  
>HPV91\_Alpha\_22023568\_nt302\_E6\_VE\_rc|1  
AAACGGATAACTGTCGCGCCACACAACCTTTAAATCCCTAAATGCAAACGACAACACTTC  
>HPV37\_Beta\_1020226\_nt561\_E6\_VE\_rc|1  
TATCGACCCACAATGTCTACACAAGCCTTTCCAATTGCGCCTAACCTTGTGAAATTGTTG  
>HPV84\_Alpha\_12958167\_nt212\_E6\_VE\_rc|1  
TTCTTCTTCCACTGTTGGTCCAAAGCTGGAGTAATCCCAGTGGCGTAGCTCACGTACTTT  
>HPV95\_Gamma\_40804520\_nt172\_E6\_VE\_rc|1  
AGCAAGCTCTGCAAGATCAACCGGATGAAAGCAAAAATACAAGGAAGACGCAAATCAAA



>HPV21\_Beta\_1020170\_nt201\_E6\_VE\_rc|1  
TAAATGTCTACGCTTAGGAGAAGGACCTTCGTCAGCACTGTCTGTTGAAGAGTCAGCCAT  
>HPV4\_Gamma\_9626597\_nt103\_E6\_VE\_rc|1  
AAAGGAAATGTCGAATCGTCTGCAGAAGTCGTCCAAGGTTGCAGGTCTGCCATCTGCCAT  
>HPV12\_Beta\_396910\_nt381\_E6\_VE\_rc|1  
TGCAGTAGCTGCGCAACAACCTTCGACAGCAAGCAGTAACAAAATGACCTTTCCAAATTAG  
>HPV32\_Alpha\_9627327\_nt313\_E6\_VE\_rc|1  
TTCTACTGTATGCCAAAATGCTGATCTGTCTGCTAGTGTCTGCAGTGCACACACTTTAGAATA  
>HPV22\_Beta\_1020178\_nt240\_E6\_VE\_rc|1  
AGGTAGCAAAAAGATCTACTACAGGTACAGTCAACTTATCTACTAAGTTGCTGTACTGTCAG  
>HPV20\_Beta\_1020162\_nt231\_E6\_VE\_rc|1  
CAATGGTGGCTCTAAGATTGGAGGTTTTGCCTCTCCAATATTAGATGGTCCTTCATCAGC  
>HPV63\_Mu\_9626605\_nt283\_E6\_VE\_rc|1  
GAAAGACTCCTGATAATAAAGCATAACTCAAGCAGACTAACATGCCTAGCACAGCACTG  
>HPVFA75/KI88-03\_Unclassified\_206902429\_nt493\_E6\_VE\_rc|1  
CAATCCCTTCCAATTACCTCTCACCTTATAAACTGCTGATGCCTAGCACAAATTGTCTAA  
>HPV81\_Alpha\_40804509\_nt253\_E6\_VE\_rc|1  
CGCTGCGCATACTCCAAATGGCCAGTTCTTTCGCCACACCAAGTTTAGCTCTCTTATTGC  
>HPV1\_Mu\_9626063\_nt105\_E6\_VE\_rc|1  
AATATATGGGATACAGAGGCTTTCGGAAAGCTGTCTGACGGTCCGGATTGGTGTCTGCCAT  
>HPV107\_Beta\_126131393\_nt620\_E6\_VE\_rc|1  
CTTCCAATTACCTCTCACCTTAAAAAACTGCTGATGCCTAGCACAAATTGTCTAACTTCTC  
>HPV22\_Beta\_1020178\_nt390\_E6\_VE\_rc|1  
ATACTGCTGAAATTCAAATTGGGCTGAAGCGTAGGCACAGCCGCTGCAACATGCAAACAC  
>HPV33\_Alpha\_333049\_nt470\_E6\_VE\_rc|1  
CCAACACGCCGCACAGCGCCCTGCCCAACGACCCGAAATATTATGAAATCGTTTGTTTAA  
>HPVFA75/KI88-03\_Unclassified\_206902429\_nt163\_E6\_VE\_rc|1  
ATCTTCTATTGGTATTTCTAAATGCCGACTCAGAACTTGACTGTTCTAGGCCTCTCCAT  
>HPV96\_Beta\_50253426\_nt270\_E6\_VE\_rc|1  
CTGTATATAAAATGTCCTAGAAACGCAGGCGGTTACTTGTTTATGAGTGGCAGGTTGTAA  
>HPV20\_Beta\_1020162\_nt621\_E6\_VE\_rc|1  
CAGCCTACAGATTCCTTTCCAAGAGCCTCTCACTAAATAAAATGGACGCTTCTGCCACA  
>HPV41\_Nu\_9626041\_nt403\_E6\_VE\_rc|1  
AGCTAGGCACCTCACACACCTCACCTCAAGGTCGCTGAGGCTCTGTCTTATAAAGTGCGG  
>HPV18\_Alpha\_9626069\_nt406\_E6\_VE\_rc|1  
GTGTCTAAGTTTTTCTGCTGGATTCAACGTTTCTGGCACCGCAGGCACCTTATTAATAA  
>HPV93\_Beta\_37089393\_nt136\_E6\_VE\_rc|1  
TTCTAACGGTATACCAAGACACCTAGCAAGCTCTGTAATGGTCTGAGGTTTACTTACTGC  
>HPV51\_Alpha\_333087\_nt458\_E6\_VE\_rc|1  
CCAGCAATTAGCGCATTGCCCCGTCCAACGTCCTCGCTATTTTCATGGAACCTTTTTTTTTTC  
>HPV65\_Gamma\_312100\_nt103\_E6\_VE\_rc|1  
AAAAGAAATATCAAATCGTCTGCAGAAGTCGTCCAAGCTGCAGGTCTGCCATCTGCCAT  
>HPV90\_Alpha\_22138122\_nt362\_E6\_VE\_rc|1  
TTTCCAACACTGCAGGCAAGCGCCTCGCCAAAGCCCAGCTATTTTATGGAACCGTTTGCC  
>HPV53\_Alpha\_9627377\_nt403\_E6\_VE\_rc|1  
CTGTTTTTCTCTGGTGTCAACGGATGTTGACATCTGTAGCACCTTATTGATAAATCAGA  
>HPV67\_Alpha\_3228267\_nt103\_E6\_VE\_rc|1  
TTCCAAAGCTTCACACAATTCTGTGAGGTTGCGTGGTTTTTCGTCTGTGTCTGAAACAT  
>HPV54\_Alpha\_9628437\_nt463\_E6\_VE\_rc|1  
ATGTAGACACCTACCCTTCCAATAGCCTCTAACACAGTGGAATCGCCTGTTGTAATCTAC  
>HPV8\_Beta\_333074\_nt392\_E6\_VE\_rc|1  
ATTAAATTCAAACGTTGCGGTTGCTACACAACAACGACAACACGCAGTAACAACGTA  
>HPVcand89\_Alpha\_22095322\_nt392\_E6\_VE\_rc|1  
TATCCTGGATGGTCGGCGTGCAGGCGTGCATATTACCCTGCAGTTGCAACACTTTCCTGT  
>HPV80\_Beta\_2911565\_nt201\_E6\_VE\_rc|1

TAAAGGTATACAAAGAGTGTCTGCAAGCTCCTGCACAGAAGAAGGCTTTGGCCTATCCAT  
>HPV5\_Beta\_9627145\_nt411\_E6\_VE\_rc|1  
ATAAAATTGGTTAAATTCATAAGTTGCAGTGGCGCCACAGCATAACGCGACAGCACGCAAA  
>HPV93\_Beta\_37089393\_nt376\_E6\_VE\_rc|1  
GCGACACCTCACTATAATTTTCAGAGAGTGGCTTTTTTTTCCTTAACCTTCTATTGCCAGCC  
>HPV49\_Beta\_9627363\_nt501\_E6\_VE\_rc|1  
AAACTCTCTGTGCTGTGCACAAATATCAAGCTTTTCCAACAAATCTAGCCTCTTAAGGCA  
>HPV40\_Alpha\_397014\_nt223\_E6\_VE\_rc|1  
GTGTGGAAAGTCGTCGCGCCACACAACATATAACTCTCTAAAGGCAAAGGCCAGTACCTC  
>HPV21\_Beta\_1020170\_nt441\_E6\_VE\_rc|1  
ATATTCATATGTCGCTGTTGCTGCGCAACAAACACGACAACAGGCAAACACACAATGATC  
>HPV30\_Alpha\_396973\_nt163\_E6\_VE\_rc|1  
TAATTCCTTCTTGCAATATACACACTGTAGCTGTAGCTCCAGCAACGATGTTTCTTGATC  
>HPV17\_Beta\_396932\_nt351\_E6\_VE\_rc|1  
CTGTGCTGTAGCATACGCACAACACTACTGCAACAGGCAAACACAAAATCTTCTTCAGTCCA  
>HPV43\_Alpha\_40804474\_nt403\_E6\_VE\_rc|1  
AATATGCTGTACTTTTTCCACTGGTGATAATGGCTTGTGGCACTTACAGCATCTAATGCA  
>HPV41\_Nu\_9626041\_nt433\_E6\_VE\_rc|1  
TATGTAATCCTTTTCCACAGATTGTAGAAGGCTAGGCACCTCACACACCTCACCTCAAG  
>HPV82\_Alpha\_6970427\_nt313\_E6\_VE\_rc|1  
GGCCTCTAATGTAGCACCATACACAGACCTACTATACCTTCTGTATTCTCTAATTCTAGA  
>HPVRTRX7\_Unclassified\_30315616\_nt325\_E6\_VE\_rc|1  
CTGCTTTTTGTCAAACCTCGCAAACCTCCAAAAAATCTAAGAACCTTCCACAGAAGTTGCA  
>HPV111\_Beta\_186461202\_nt157\_E6\_VE\_rc|1  
TACAGGAATTGCTAGTGTGTCTGCTAGTTTCCTTTACTGTCCTAGGCTTTGGCCTATCCAT  
>HPV14D\_Beta\_396918\_nt447\_E6\_VE\_rc|1  
TAAACTCATACGTTGCTGTTGCTGTGCAGCATACACGGCAACAAGCAAATACACAATGAC  
>HPV91\_Alpha\_22023568\_nt182\_E6\_VE\_rc|1  
GTTACACTGGTCACACAACCTCAAATATGGTCTTAGCGTTTTGGGAGCAGCTACGTGCAGA  
>HPV52\_Alpha\_397038\_nt103\_E6\_VE\_rc|1  
TTCCAGCACCTCACACAATTCGTGCAGGGTCCGGGGTCGTGTTGCTGGATCCTCAAACAT  
>HPV56\_Alpha\_397053\_nt103\_E6\_VE\_rc|1  
CTCACTCAAGTGGTGCAGGCTTCGTGGACGTTCTGTGGATTGTTGAATTGTGGCTCCAT  
>HPV23\_Beta\_1020186\_nt501\_E6\_VE\_rc|1  
ACAATACTGACACCTAATACAAATTTGGCCTATAGGTCGTTGCTCCTCCTGCTCAATTTT  
>HPV110\_Beta\_186461194\_nt173\_E6\_VE\_rc|1  
AACAGGAATGCATAATGTATCTGCAAGCTGTTGTACTGTCAAAGGCTTTGGCCTGGCCAT  
>HPV31\_Alpha\_333048\_nt109\_E6\_VE\_rc|1  
TTCCAATGCCGAGCTTAGTTTCATGCAATTTCCGAGGTCTTTCTGCAGGATTTTTGAACAT  
>HPV25\_Beta\_396948\_nt591\_E6\_VE\_rc|1  
GATTCCTTTCCAAGAGCCTCTTACTAGATGGAAAGGACGTCTTCTGCCACAAATATCAAG  
>HPV22\_Beta\_1020178\_nt360\_E6\_VE\_rc|1  
GTAGGCACAGCCGCTGCAACATGCAAACACAAAGTCCTCGTCTGTCCAAATTAATTGCAA  
>HPV66\_Alpha\_1020290\_nt493\_E6\_VE\_rc|1  
AGCTTGTCTACTCGTATGTCTCCAACACTGCAAACATGACCCGGTCCATGCATATGCTAT  
>HPV55\_Alpha\_1020266\_nt103\_E6\_VE\_rc|1  
GCACTCCTTGACAACTGGTCTATACTTTGTGCAGCCGTGGAGGCATTTGCACTTTCCAT  
>HPV42\_Alpha\_333211\_nt259\_E6\_VE\_rc|1  
TAAACAAAATGCACATGCAGCATATGGAAAGTCCTTCTCCACACCACTACCAAATCTTT  
>HPV66\_Alpha\_1020290\_nt403\_E6\_VE\_rc|1  
CAATTGTTTTTCTCCGGTGTTAACGGACATTGACATCGGTAGCACCTTATTGATAAATC  
>HPV18\_Alpha\_9626069\_nt466\_E6\_VE\_rc|1  
CGAATGGCACTGGCCTCTATAGTGCCAGCTATGTTGTGAAATCGTCGTTTTTCATTAAG  
>HPV22\_Beta\_1020178\_nt570\_E6\_VE\_rc|1  
GTGCCTGCACCTTCCCTTCCAATGATCTCTAACCTTGTGAAATGGTTGATTGGAACAGCA

>HPV102\_Alpha\_71726718\_nt362\_E6\_VE\_rc|1  
TGATACCTTACAGTTGCAGCACTTTCTGTCCACTCCCCTGCTATTTTATGAAACCTATC  
>HPV82\_Alpha\_6970427\_nt103\_E6\_VE\_rc|1  
ATTGCAGGCTTCACATAATTCGTGCAGCGTTCTGTGGTCTTTCTCTTATGTCTTCAAACAT  
>HPV47\_Beta\_333062\_nt419\_E6\_VE\_rc|1  
TTGATAAAAAACATTAAATTCATATGTGGCAGTTGCTGAGCAGCACAAACGGCAGCAGGC  
>HPV23\_Beta\_1020186\_nt291\_E6\_VE\_rc|1  
AAGAAACCTAGAACAAAATCTGCAAGGTAGCAAGAGATCTACCACTGGTACTGTCAACTT  
>HPV88\_Gamma\_167600365\_nt198\_E6\_VE\_rc|1  
AAAACAAGCACCGCTCCTCCAGACCAAATAAGCTGTTTCTGATAGAACGAACCCAACTG  
>HPVcand85\_Alpha\_4574720\_nt496\_E6\_VE\_rc|1  
GCCTTGCTGTTCTTGTGCACGCGTCATGCACCGGCGACACTGTCTCTATATTTCCCTGC  
>HPV19\_Beta\_396940\_nt441\_E6\_VE\_rc|1  
CTCATAGAACTCATTAATTCAAATGTTGCAGTTGCTGTGCAACACCAGCGACAGCAAGC  
>HPV54\_Alpha\_9628437\_nt403\_E6\_VE\_rc|1  
GTGCCGTTGCTTTTCCACGTTGCACAAAGGTTTATGGCACAGCCAGCACCTTATAAATAT  
>HPV30\_Alpha\_396973\_nt493\_E6\_VE\_rc|1  
CTCAGTGGACGTTGTGTGTCTCCAGCATTGCAGACATAACCCGGTCCACGTACGTGATAT  
>HPV31\_Alpha\_333048\_nt469\_E6\_VE\_rc|1  
CCAACATGCTATGCAACGTCCTGTCCACCTCCTCTATGTTGTGGAATCGTTTCTTTTT  
>HPVcand86\_Alpha\_15741127\_nt182\_E6\_VE\_rc|1  
GTGCTCCAGTGTCTGTAGCTCACGTACCTTGGCTTCTCTGCATATGCATTTTAGGCACAC  
>HPV35\_Alpha\_333050\_nt471\_E6\_VE\_rc|1  
CCAACAGGACATACACCGACCTGTCCACCGTCCACCGATGTTATGGAATCGTTTTTTTTTC  
>HPV38\_Beta\_1020234\_nt441\_E6\_VE\_rc|1  
CCTTATAACAATAAGGCCTATTGTCTGTTGCTCCACCTGTTCAATTTACGGCCAAAGAC  
>HPV77\_Alpha\_2911558\_nt253\_E6\_VE\_rc|1  
GCCATATAGCAGTAAACACCGTGCACATGCACCGTACGGCGCCCCACCTCTCCACACCAC  
>HPV25\_Beta\_396948\_nt231\_E6\_VE\_rc|1  
TAGATCAGTAATTGTTGCTGGCAATGGTGGCTGTATAACCTGCGCTTGCTCTGGTGGTCC  
>HPV14D\_Beta\_396918\_nt477\_E6\_VE\_rc|1  
TGCCTTCAACAGTACTCTCATAAAATTCATTAACTCATACGTTGCTGTGCTGTGCAGC  
>HPV26\_Alpha\_9627305\_nt428\_E6\_VE\_rc|1  
CCCTGCTATTTCTGTGAAATCGTCGCTTTTCATCCACAATTCTTTGTTTTCTTCTGGCCC  
>HPV28\_Alpha\_1020202\_nt253\_E6\_VE\_rc|1  
CACAATGCCCTGCAGTAGTAAACACCGGGCACAGGCACCATAGGGCGCTCCCGTTCTCCA  
>HPV33\_Alpha\_333049\_nt140\_E6\_VE\_rc|1  
GCACTGTAGTTCAATGTTGTGTATAGTTGTCTCCAATGCTTGGCACAAATCATGCAATGT  
>HPV42\_Alpha\_333211\_nt139\_E6\_VE\_rc|1  
CTGTAAATTCGCAATGTCAGCCCAAATTCCTTACACAATTGGTATAATGTGCGTGGCTG  
>HPV96\_Beta\_50253426\_nt360\_E6\_VE\_rc|1  
CAACAGGTCTTCAGTAGGAATGCCCAAATGACTTCTAAGTTGCTGCACTGTCTTTAAATC  
>HPV96\_Beta\_50253426\_nt150\_E6\_VE\_rc|1  
TAACGGTTCCAAAGTTGGCAGACGTTTTGGCGGGCTTTTCTTGGCAGGTTTAACTGCTT  
>HPV54\_Alpha\_9628437\_nt133\_E6\_VE\_rc|1  
AAGTTGCAAACTATGCATAGGAATATTGCATACCTTGCACAAATCAGCTAGAGTACGCGG  
>HPV83\_Alpha\_5059324\_nt32\_E6\_VE\_rc|1  
ATAAATGCAAAATCAGTCGTAAGTCTTCCAAATCCACCTCGCAGTCTTTGCACAGCAGAAA  
>HPV58\_Alpha\_222386\_nt141\_E6\_VE\_rc|1  
GCATTTCAATTTCGATTTTCATGCACAGATGTCTCCAACGCCTGACACAAATCATGCAATGT  
>HPVcand89\_Alpha\_22095322\_nt362\_E6\_VE\_rc|1  
TATTACCCTGCAGTTGCAACACTTTCTGTCCACTCTCCAGATATTTTATGAAATCGCTC  
>HPV52\_Alpha\_397038\_nt163\_E6\_VE\_rc|1  
TCTTCGTTGTAGCTCTTTTTTGCAGTGCACACACTGCAGCCTTATTTTCATGCACCGATT  
>HPV69\_Alpha\_6970418\_nt403\_E6\_VE\_rc|1

ATCCACAATTCTCTGTTTTTCTTCCGGTCCCAATGGTATTTGGCATCTATGACACCTTAT  
>HPV94\_Alpha\_40804528\_nt304\_E6\_VE\_rc|1  
CTCCTCTTCCACGCCTTCTACATAATATGAATATTGCCAATATTTTAGGCGCCGTGCAAT  
>HPV3\_Alpha\_397005\_nt433\_E6\_VE\_rc|1  
TTTGTGCAGTCTTCGCTTTTCGTTGCGGTGTCTGTCTCTTCTCTTCCCTTTACCAGTGGTTT  
>HPV61\_Alpha\_9628574\_nt373\_E6\_VE\_rc|1  
CTGTATACTTAACGGTTTGTGTCATGCATGGCACCGTATATATAGTTCAGCTAATGACCG  
>HPV54\_Alpha\_9628437\_nt253\_E6\_VE\_rc|1  
TTCTAGGCACAGTGCACATGCAGCATGTGGAAAGCCGTGTCTCCACACCACAAATAGGTC  
>HPV19\_Beta\_396940\_nt291\_E6\_VE\_rc|1  
ACAAGGCACTAAACAGTCATCCAACGGTATTTCTAGCAATGCTGCTAATCCAGCAATTGT  
>HPV77\_Alpha\_2911558\_nt223\_E6\_VE\_rc|1  
ACCGTACGGCGCCCCACCTCTCCACACCACATTTAATTCTCTAATTGTAAATGCTGCCAG  
>HPVcand62\_Alpha\_39932599\_nt152\_E6\_VE\_rc|1  
AATCTCTCTCAATAGGCATGCTGCGCATACTCCAAATGGCCAGTCCTTTCGCCGCACCAC  
>HPV95\_Gamma\_40804520\_nt442\_E6\_VE\_rc|1  
CCTCCACAAACCCCTTATTAAATAGCACACCTCACCAGTGTATAACAGGTCAAGTTTTTC  
>HPVcand87\_Alpha\_14475578\_nt328\_E6\_VE\_rc|1  
TGCTACACCTGTTTCTTCTTCTACTGTGGGTCCGTAGCTGGAGTACTCCCAGTGACGAAG  
>HPV81\_Alpha\_40804509\_nt493\_E6\_VE\_rc|1  
GGCCATGCATGCTCCTCTACAATGGCAGCACTTTCCTCCACTCTCCAGCTATTTTATG  
>HPV88\_Gamma\_167600365\_nt228\_E6\_VE\_rc|1  
AGAAAGCCTAGAACAAAGGGACACAACACGCAAAACAAGCACCGCTCCTCCAGACCAAAT  
>HPV3\_Alpha\_397005\_nt283\_E6\_VE\_rc|1  
TTTTTAGGCGTCGTGCAATGCCCTCTACAAGTAAACACCGTGCACAAGCACCGTAGGGCGC  
>HPV60\_Gamma\_9628566\_nt103\_E6\_VE\_rc|1  
ATCAAATTCAGAGCAATAATCAGCCACTGTTGTTGGAAACCTGTCTTCTTCCATCTGCAT  
>HPV42\_Alpha\_333211\_nt499\_E6\_VE\_rc|1  
GCGTCTCTCCACGCATTGTCCTCTGCAATGCGTACACCGACCCGTCCACTGACACAATAT  
>HPV16\_Alpha\_9627100\_nt84\_E6\_VE\_rc|1  
TGGTAACTTTCTGGGTCGCTCCTGTGGGTCTGAAACATTGCAGTTCTCTTTTGGTGCAT  
>HPV43\_Alpha\_40804474\_nt493\_E6\_VE\_rc|1  
TCGTGGCTTTTTTCCATGCATGATTTCCAGCAATGTAGGCAGTATCCTTTCCACACGCT  
>HPV16\_Alpha\_9627100\_nt474\_E6\_VE\_rc|1  
TGATGATCTGCAACAAGACATACATCGACCGGTCCACCGACCCCTTATATTATGGAATCT  
>HPV16\_Alpha\_9627100\_nt444\_E6\_VE\_rc|1  
GGTCCACCGACCCCTTATATTATGGAATCTTTGCTTTTTGTCCAGATGTCTTTGCTTTTC  
>HPVcand86\_Alpha\_15741127\_nt212\_E6\_VE\_rc|1  
GTCTTGTTCCACTGTGGATCCGTAGCTGGAGTGTCTCCAGTGTCTGCTAGCTCACGTACCTT  
>HPV61\_Alpha\_9628574\_nt253\_E6\_VE\_rc|1  
CACTTTTACTTCACGTGCCAAGCATGGTGCGCATACTCCAAATGGCCAGTTATGTCTCCA  
>HPV3\_Alpha\_397005\_nt403\_E6\_VE\_rc|1  
TCTGTCTTCTCTTCCCTTTACCAGTGGTTGTGACACATGTAGCATCTAATTTGCTGTGT  
>HPV7\_Alpha\_9627389\_nt403\_E6\_VE\_rc|1  
AACAAATGTGGTTGGTTTTTCCACAGGAGACAATGGTTTGTGGCATTTCAGCATCTTAT  
>HPV11\_Alpha\_333026\_nt103\_E6\_VE\_rc|1  
AAACGTCTTGCAAACTGGTCTATAGATGTTGACAGCTGGAGGCATCTTACTTTCCAT  
>HPVTRX7\_Unclassified\_30315616\_nt595\_E6\_VE\_rc|1  
ACAGTGCCTGCACACTCCCTTTCCAGCCGTCTCTCACTTTGTGGAACGGAAGGCCTCGACC  
>HPV106\_Alpha\_71726710\_nt392\_E6\_VE\_rc|1  
GCAAGCGCCTCGCCAGTGCCCGCTATTTTATGGAACCGTTTGCTTCTGTTATTAGCCG  
>HPV9\_Beta\_9627396\_nt351\_E6\_VE\_rc|1  
GCTACTACAGAGTCCATACACCAAATCCTCCTCTGTCCAAATAAGCTGTAAACACTTGTG  
>HPV40\_Alpha\_397014\_nt493\_E6\_VE\_rc|1  
CGAGCGTTGGCCTTTCTCCATGCATTTCTTCCAGCAATGTAGACAGTACCCTGTCCACGA

>HPV3\_Alpha\_397005\_nt253\_E6\_VE\_rc|1  
TAAACACCGTGCACAAGCACCGTAGGGCGTCCCCTTCTCCACACCACATTCAGTTCCCG  
>HPV12\_Beta\_396910\_nt231\_E6\_VE\_rc|1  
TATATCTAAAAGGTCAGCTAACTCTTTAATAGTTGTGGGCAGCTCAGGCGTACTGTCTGT  
>HPV90\_Alpha\_22138122\_nt272\_E6\_VE\_rc|1  
GCACAGTGGTTTATGGCACAGGTAGCATCTAATAAGCAATTCTAAAATAGGCACTCCTGT  
>HPV63\_Mu\_9626605\_nt133\_E6\_VE\_rc|1  
GCAAAAATTGCAAGGAACAACCAAATCAATAAATGGGATACGGAGAGCAGAACTCAGATC  
>HPV45\_Alpha\_397022\_nt403\_E6\_VE\_rc|1  
GTGTCTACGTTTTCTGCTGGGTTCAATGGTTTCTGGCACCGCAGGCACCTTATTAACAA  
>HPV61\_Alpha\_9628574\_nt223\_E6\_VE\_rc|1  
GCATACTCCAAATGGCCAGTTATGTCTCCACACAATGCTTAGCTCCTTTAGTGCAAACGC  
>HPV67\_Alpha\_3228267\_nt133\_E6\_VE\_rc|1  
GCAGGGCAAACCTATTTCATGCACCGTGGTTTCCAAAGCTTCACACAATTCGTGCAGGTT  
>HPV24\_Unclassified\_9628486\_nt561\_E6\_VE\_rc|1  
TATCTGCTTACACTGCCTACAGAGTCCTTCCAGCCCCCTCTCACTTTATGAAATAATTC  
>HPV36\_Beta\_1020218\_nt411\_E6\_VE\_rc|1  
ATAAACTGATTAACTCATATGTGGCTGTTGCACCACAACAAACACGACAGCAGGCAAA  
>HPVcand85\_Alpha\_4574720\_nt136\_E6\_VE\_rc|1  
TATTTCTATATCTTGCAGTGATGTGTCCAGTGTGTTGCATAGGTCTGGTAGTTTGTAGGG  
>HPV58\_Alpha\_222386\_nt111\_E6\_VE\_rc|1  
CTCCAACGCCTGACACAAATCATGCAATGTCCGTGGTTTCTCCTCTGCGTCCTGGAACAT  
>HPV16\_Alpha\_9627100\_nt114\_E6\_VE\_rc|1  
TATAGTTGTTTGCAGCTCTGTGCATAACTGTGGTAACCTTTCTGGGTCGCTCCTGTGGGTC  
>HPVcand85\_Alpha\_4574720\_nt196\_E6\_VE\_rc|1  
AGCAAAGGCAAATTCATATACCTCTGTTTCGCTGCAGGACGCTTTTACAATATACACAGCT  
>HPV69\_Alpha\_6970418\_nt433\_E6\_VE\_rc|1  
CCCTGCTATTTTCATGGAACCGTCGCTTTTCATCCACAATTCTCTGTTTTCTCCGGTCC  
>HPV42\_Alpha\_333211\_nt169\_E6\_VE\_rc|1  
TAAGTGCTTTTTGCACCAAATGCAGGAAATCTGTAAATTCGCAATGTCAGCCCCAAATTC  
>HPV69\_Alpha\_6970418\_nt493\_E6\_VE\_rc|1  
TTGTGTTTCTGTTGCTTCGCGCCTTGGTCTCCAGCAGTTTGTGCACAACCCTTTCCAGTA  
>HPV71\_Alpha\_12084981\_nt173\_E6\_VE\_rc|1  
TAATTGTTCTGCAGAATATGCAGGTTAGGTTTCAGGTCCTGCAGGTCCACGTCGTACTGGT  
>HPV41\_Nu\_9626041\_nt493\_E6\_VE\_rc|1  
TCGAACACAAGTTCCCCTCCAGATCCCGCCAATTCTATGCACAGACAAGTCTTCCCGCAA  
>HPV72\_Alpha\_1491683\_nt343\_E6\_VE\_rc|1  
TATATATAGTTCTGCTAATGATTTGCCTGTTTCCTGTTCCACAGTGGGTCCGTAGCCCGA  
>HPV56\_Alpha\_397053\_nt133\_E6\_VE\_rc|1  
TCTAAGATCAATTAAAGGTATTTCTAATACCTCACTCAAGTGGTGCAGGCTTCGTGGACG  
>HPV18\_Alpha\_9626069\_nt136\_E6\_VE\_rc|1  
TATTTCTATGTCTTGCAGTGAAGTGTTTCAGTTCCTGTCACAGATCAGGTAGCTTGTAGGG  
>HPV48\_Gamma\_9628542\_nt463\_E6\_VE\_rc|1  
CTCATGGCTGATACAATTTCTACAAACACCTCTCCAAGTCCCGCGAATTAACAGAAAATC  
>HPV39\_Alpha\_333245\_nt198\_E6\_VE\_rc|1  
ACTAAATGCAAATTCATATACCTCGGTTTGCTGTAGTGGTCTGCTGCAATAGACACAGGC  
>HPV68a\_Alpha\_71726685\_nt122\_E6\_VE\_rc|1  
TACCCCGTCTCTATACACTACACATAGGTCATAAGGCAAATTCATATACCTCTGTCCG  
>HPV65\_Gamma\_312100\_nt463\_E6\_VE\_rc|1  
TTGTTTCCATAATGCAATTTCTGCAATAGCCCCCTCCACAAACCCCTTATTAAGTAGCAGGC  
>HPVRTRX7\_Unclassified\_30315616\_nt565\_E6\_VE\_rc|1  
TCTCACTTTGTGGAACGGAAGGCCTCGACCACAGCTATCTAATTTTTCAATGGTGCTCAA  
>HPV36\_Beta\_1020218\_nt591\_E6\_VE\_rc|1  
ACACTGCCTACAGATTCCTTCCAGGCGTTTCTGACTCTATGAAAGGGAAGTCCTCTTCC  
>HPV19\_Beta\_396940\_nt261\_E6\_VE\_rc|1

TTCTAGCAATGCTGCTAATCCAGCAATTGTTGCTGGTAATGGTGGCTCTGTGACCTGTGG  
>HPV96\_Beta\_50253426\_nt180\_E6\_VE\_rc|1  
GGCAACCGAGAGAGTTGCGAACTTACCGTTAACGGTTCCAAAGTTGGCAGACGTTTTGG  
>HPV52\_Alpha\_397038\_nt133\_E6\_VE\_rc|1  
ACACTGCAGCCTTATTTTCATGCACCGATTCTTCCAGCACCTCACACAATTCGTGCAGGGT  
>HPV59\_Alpha\_557236\_nt56\_E6\_VE\_rc|1  
TGTTGTGCTCAAATCAGGCAGTTTGTATGGTCGTTGTGTAGGATCCTCAAAGCGTGCCAT  
>HPV53\_Alpha\_9627377\_nt433\_E6\_VE\_rc|1  
GTGAAACCGTTTCTTATAGTCACAGTGTAAGTGTCTTTTCTCTGGTGTCAACGGATGTTG  
>HPV83\_Alpha\_5059324\_nt92\_E6\_VE\_rc|1  
AATACACAGCTCCTTCCATGCAAAGGACAGCACTTCTGTGTTGTTAATTCATTTGTGCA  
>HPV77\_Alpha\_2911558\_nt373\_E6\_VE\_rc|1  
GGTGAGTGGTTTGTGACACATGTAGCATCTGATTGCTGGGTATCTATGGATTCTTTTGT  
>HPV15\_Beta\_396924\_nt561\_E6\_VE\_rc|1  
TATCGCCCTACAATGTCTACACAATCCTTTCCAATTGCGTCTAACCTTGTGGAATTGCTC  
>HPV43\_Alpha\_40804474\_nt373\_E6\_VE\_rc|1  
TGGCTTGTGGCACTTACAGCATCTAATGCACAAATCAAACACTGTTTGCTTAGTTTCTTC  
>HPV61\_Alpha\_9628574\_nt343\_E6\_VE\_rc|1  
GCACCGTATATAGTTTCAGCTAATGACCGTCCTGTGTCTGTTCCACAGTGGGTCCGTA  
>HPVcand86\_Alpha\_15741127\_nt272\_E6\_VE\_rc|1  
GCACAATGGTTTAAAGCACGCATGGCACCCTATATTTAAGTGTGCCAATGATACGCCTGT  
>HPV6\_Alpha\_6002612\_nt104\_E6\_VE\_rc|1  
AAACGTCTTGCACAACCTGGTCTATGGTCGTTGCAGACGTGGAGGCATTTGCACTTTCCAT  
>HPV47\_Beta\_333062\_nt509\_E6\_VE\_rc|1  
AAGAAATGACAGGCAGGTATGACACCTTATGTCAATCTCAAAAATGGAAAGGCCTGTAGC  
>HPV34\_Alpha\_9627334\_nt463\_E6\_VE\_rc|1  
GCACTGTGTACAGCGTCCGGTCCACTGATCCGCTATTTGGTGAAACCGTTTGTTTTCATC  
>HPV76\_Beta\_2911551\_nt201\_E6\_VE\_rc|1  
AGAAGAAATGGGTATATTTAAGAGTTGGCTAAGCTCACATACCTTAGCAGGTCTAGCCAT  
>HPV1\_Mu\_9626063\_nt255\_E6\_VE\_rc|1  
CTCCAATAGGCTAACAGTTCTAGCACACCTTGACAGCATCCAAACACCAAATTGTCTCT  
>HPV106\_Alpha\_71726710\_nt272\_E6\_VE\_rc|1  
TATTGGTATCCCTGTTTCATACTCCACTGTGGGTGCATAGCTGGAGTAGTCCCAGTATCT  
>HPV5\_Beta\_9627145\_nt591\_E6\_VE\_rc|1  
ACACTGCCTACAGATTCCCTTCCAGGCGTTCCTCACCTTATGAAAGGGAAGGCCTCTGCC  
>HPV16\_Alpha\_9627100\_nt204\_E6\_VE\_rc|1  
TACTATGCATAAATCCCGAAAAGCAAAGTCATATACCTCACGTGCGAGTAACTGTTGCTT  
>HPV18\_Alpha\_9626069\_nt106\_E6\_VE\_rc|1  
TTCCGTGCACAGATCAGGTAGCTTGTAGGGTCGCCGTGTTGGATCCTCAAAGCGCGCCAT  
>HPV93\_Beta\_37089393\_nt106\_E6\_VE\_rc|1  
CTCTGTAATGGTCTGAGGTTTACTTACTGCCGCCATTAAGATGTCTGCCTTATATACCAT  
>HPV88\_Gamma\_167600365\_nt438\_E6\_VE\_rc|1  
ACAACAATTTCTGCACGTTCCCCTCCAAGTGTTCCTCACAAGATGGAAACACTCACCCCT  
>HPV26\_Alpha\_9627305\_nt458\_E6\_VE\_rc|1  
CCAACAATTTGTACACAACCCTTTCCACTGCCCTGCTATTTCTGTGAAATCGTCGCTTTTC  
>HPV38\_Beta\_1020234\_nt231\_E6\_VE\_rc|1  
GCAGAATCTACAGGGTAATAACAGATCCTCTACAGGAAGTGTAACTTATCACTGAGCTG  
>HPV21\_Beta\_1020170\_nt291\_E6\_VE\_rc|1  
ATCATCCAATGGTATCTCTAACAGATTGGCTAGGTCACGAATTGTAGCTGGTAATGGTGG  
>HPV65\_Gamma\_312100\_nt433\_E6\_VE\_rc|1  
CCTCCACAAACCCCTTATTAAGTAGCAGGCTGGTGCAGGTACAGCAAGTCTAATTTCTC  
>HPV10\_Alpha\_9627257\_nt253\_E6\_VE\_rc|1  
GCCCTGTAGGAGTAAACACCGTGCACAGGCACCGTATGGCACTCCCGCTCTCCACACCAA  
>HPV72\_Alpha\_1491683\_nt373\_E6\_VE\_rc|1  
GCTTAGGGGTTTGCAGCATGCATGGCACCTTATATATAGTTCTGCTAATGATTTGCCTGT

>HPV52\_Alpha\_397038\_nt463\_E6\_VE\_rc|1  
CCAACACTCTGAACAGCGCCCTGTCCAACGACCCATAATATTATGAAATCGCTTGTTTGC  
>HPV73\_Alpha\_1491692\_nt103\_E6\_VE\_rc|1  
CACTTCGTCACATAACGCTTGTAGCTTGTATGGTCGTTCTTCTGAATTGGGAAACAGCAT  
>HPV39\_Alpha\_333245\_nt468\_E6\_VE\_rc|1  
CCGTCGACACTGTCCTGTATAGCTTCCTGCTATTTTATGAAATCTTCGTTTGCTATTTAG  
>HPV25\_Beta\_396948\_nt411\_E6\_VE\_rc|1  
AAATTCAAATGTGGCAGTTGCTGTGCAACAACAGCGACAGCAGGCATACACAAGATATTC  
>HPV68a\_Alpha\_71726685\_nt92\_E6\_VE\_rc|1  
ACTAAAGGCAAATTCATATACCTCTGTCCGTTGTAGTTGCCTTCTGCAATAGACACAGTC  
>HPV32\_Alpha\_9627327\_nt343\_E6\_VE\_rc|1  
TTGTTCTTCCAACAGTAGTCCTGTTTCTTGTCTACTGTATGCCAAAATGCTGATCTGTC  
>HPV12\_Beta\_396910\_nt531\_E6\_VE\_rc|1  
CCGACCACAGCTGTCTAACTTTTCAATTGTATCTAAAAATGACAAGCACGTCTGACACCT  
>HPV14D\_Beta\_396918\_nt207\_E6\_VE\_rc|1  
TATCACAATAGTTACTCTTAGGAGAAGGACCTTCATCTGCACTGTCTGTTGAAGAGTCAG  
>HPVcand87\_Alpha\_14475578\_nt208\_E6\_VE\_rc|1  
TCTCCACACCAGCAATAATTCCCTTAATGCAAACGCCAGCAATTTCGCTTCTGTTAATTC  
>HPV88\_Gamma\_167600365\_nt258\_E6\_VE\_rc|1  
GCGGTAAAAGCGTTCAGCCTCATACCTAGCAAAGCCTAGAACAAGGGACACAACACGC  
>HPV68a\_Alpha\_71726685\_nt302\_E6\_VE\_rc|1  
GTGCCTTAGTTTTCTGCTGGACACAATGGTTTCAGGCAACTCATGCACCTTATCAATAA  
>HPV110\_Beta\_186461194\_nt323\_E6\_VE\_rc|1  
TTGCGCTGTAGCATGAGCACAACCTACTACAGCATGCAAAAACAAAATCTTCCTCAGTCCA  
>HPV102\_Alpha\_71726718\_nt212\_E6\_VE\_rc|1  
GGTTTCTTCTTCAACCGTTGCGCCGTAGCTGGAGTAGTTCCAGTGCCGTAGTTCCCGCAC  
>HPV12\_Beta\_396910\_nt591\_E6\_VE\_rc|1  
ATGCTTGCACTGTCTGCAAATTCCTTCCACCTGTCTCTAACCTTGTGGAACGGAAGGCC  
>HPV82\_Alpha\_6970427\_nt403\_E6\_VE\_rc|1  
GTCCACCACCTTTTGCCTTTTCTTTCAGGCCCAAGTGGTCTCTGACATCTATGACACCTTAT  
>HPV29\_Alpha\_1020210\_nt463\_E6\_VE\_rc|1  
TGACCAACAATACAGGCAACTCCCTCTCCAGTATCCAGAAATTTTGTGTAGTCTTCGCTT  
>HPV8\_Beta\_333074\_nt272\_E6\_VE\_rc|1  
AAAGTTACCACAAAAGTTGCACGGTACTGAACAGTCCTGCAATGGAATACCTAAAGCCGC  
>HPV7\_Alpha\_9627389\_nt493\_E6\_VE\_rc|1  
CGAGCGTTGGCCTTTCTCCATGCATTTCTTCCAACAGTGCAGACAGTACCCTGTCCACGA  
>HPV37\_Beta\_1020226\_nt531\_E6\_VE\_rc|1  
CCAATTGCGCCTAACCTTGTGAAATTGTTGCTGAGTATAGCAAGTCTCCAACCTTCTCTAA  
>HPV74\_Alpha\_27462483\_nt2\_E6\_VE\_rc|1  
GCAGTCCTTGACAACTGGTCTATACTTTTTGCAGACGTGGAGGCATTTGCACTTTCCAT  
>HPV92\_Beta\_27531786\_nt437\_E6\_VE\_rc|1  
TGCCTTCCAAGCTCCTCTAACTCTATCAAAAGGAATGCCTGATGCACAACTGCCAATTT  
>HPV34\_Alpha\_9627334\_nt403\_E6\_VE\_rc|1  
TACATGCCTTTGCTTTTCCAATGGACACAGTGGTTTTTGGCATTTTCCGCACCTTATTAA  
>HPV56\_Alpha\_397053\_nt433\_E6\_VE\_rc|1  
TAGATGAAATCGTCTTTTCTGTACAAATGCAATTGCTTTTCTCCGGAGTTAACGGACT  
>HPV39\_Alpha\_333245\_nt138\_E6\_VE\_rc|1  
TATTGTAATGTCTGCAAGGTGGTGTCCAGCGTTGTGCACAGGTCTGGCAATTTGTATGG  
>HPV49\_Beta\_9627363\_nt201\_E6\_VE\_rc|1  
TTCCCAAATAGGTATATTTAAGTGGTGGGCTAGCTCACATACCTTAACAGGTCTAGCCAT  
>HPV25\_Beta\_396948\_nt291\_E6\_VE\_rc|1  
GTTGCCACAGAAGTTGCAAGGTACTAAGCAATCATCTAATGGAATTTCCAATAAAGCTGC  
>HPVcand85\_Alpha\_4574720\_nt166\_E6\_VE\_rc|1  
CTGCAGGACGCTTTTACAATATACACAGCTTATTTCTATATCTTGCAGTGATGTGTCCAG  
>HPV22\_Beta\_1020178\_nt450\_E6\_VE\_rc|1

TTGGCCTACAGGTCGTTGTTCTTCTTGCTCAATTTACGACCATACAAAGTAACTTGATA  
>HPVcand87\_Alpha\_14475578\_nt478\_E6\_VE\_rc|1  
GGCCATGCATATTGCCCTACAGTTGCTGCACTTTCTGTCCACTTCCCAGCTATTTTGTG  
>HPV58\_Alpha\_222386\_nt471\_E6\_VE\_rc|1  
CCAACACACTGCACAGCGCCCTGTCCAACGACCCGAAATATTATGAAACCTTTTGTTTAA  
>HPV65\_Gamma\_312100\_nt253\_E6\_VE\_rc|1  
AAATCTTGCACTTAAACGTAAGCATTCAGAACAGCATGCATAGTAGCAACCCCCCTGAA  
>HPV42\_Alpha\_333211\_nt109\_E6\_VE\_rc|1  
CTTACACAATTGGTATAATGTGCGTGGCTGTGATGAGGCAGATGTACCTGACATTCTGCC  
>HPV63\_Mu\_9626605\_nt103\_E6\_VE\_rc|1  
AAATGGGATACGGAGAGCAGAACTCAGATCCCGAACCGAATGTACAGATGTCAGGTCCAT  
>HPV56\_Alpha\_397053\_nt463\_E6\_VE\_rc|1  
CAAACATGACCCGGTCCAACCATGTGCTATTAGATGAAATCGTCTTTTTCTGTCACAATG  
>HPV36\_Beta\_1020218\_nt381\_E6\_VE\_rc|1  
TGCACCACAACAAACACGACAGCAGGCAAATACACAGTAATCCTTCCAAATTAACTAAG  
>HPV71\_Alpha\_12084981\_nt503\_E6\_VE\_rc|1  
CATTGTTGGCCTCGCATGGTTTCCAACACTGTAGGCAAGCACCGCGCCAATGGCCTGCTA  
>HPV80\_Beta\_2911565\_nt561\_E6\_VE\_rc|1  
TATCGACCCACAATGTCTACACAATCCTTCCAATTGCGCCTTACCTTATGGAATTGCTG  
>HPV9\_Beta\_9627396\_nt381\_E6\_VE\_rc|1  
AAATTCTAACTGTGCAGACGCATAAGCACAGCTACTACAGAGTCCATACACCAAATCCTC  
>HPV81\_Alpha\_40804509\_nt283\_E6\_VE\_rc|1  
CTCCCGTACTTTAGCTTCTCTGCACAAGCACGCTGCGCATACTCCAAATGGCCAGTTCTT  
>HPV81\_Alpha\_40804509\_nt163\_E6\_VE\_rc|1  
CTTTTTTGCAAAATATGCAGGTCAGTTGCAGGTCGTCTAGGTCCACTTCACACTCCTTACA  
>HPV8\_Beta\_333074\_nt542\_E6\_VE\_rc|1  
ATGAAAGGGACGGCCTCTCCACAGCAATCTAATTTCTCTATGATATCCAAAAATGACAA  
>HPV76\_Beta\_2911551\_nt531\_E6\_VE\_rc|1  
CACCCCTTTCACCTATTTCTAACTTTGTGAACTCTCTTTGCTGTGCACAATGATCAAG  
>HPV59\_Alpha\_557236\_nt326\_E6\_VE\_rc|1  
TTTTAGGCATCTATAACAGCGTATCAGCAGCTCATGTAACGGTGTCTTGGTTTCAGCCTC  
>HPV39\_Alpha\_333245\_nt108\_E6\_VE\_rc|1  
CGTTGTGCACAGGTCTGGCAATTTGTATGGCCGTTCTGCAGGATTGTGAAATCGCGCCAT  
>HPV53\_Alpha\_9627377\_nt193\_E6\_VE\_rc|1  
TGCAAAATTATATACCTCTGACGCTGTCAATGCCTTCTTGCAGAACACACAGCCAAGTTG  
>HPV59\_Alpha\_557236\_nt296\_E6\_VE\_rc|1  
CTCATGTAACGGTGTCTTGGTTTCAGCCTCTAATGTTTCTCCATACACGGAATCTCTATA  
>HPV84\_Alpha\_12958167\_nt92\_E6\_VE\_rc|1  
TAGTAATTCCTTTACTGCAAAGGCCAGCACTTCGCCTTCCGTTAATTCCTTGCAAAA  
>HPV97\_Alpha\_71726694\_nt362\_E6\_VE\_rc|1  
CGAATTGCACTGGCCTCTATAATAACCAGATATGTGGTGGAATCGTCGTTTGTCTTTAAG  
>HPV102\_Alpha\_71726718\_nt272\_E6\_VE\_rc|1  
ACTACACAACGGCTTCAGGCACATATAGCATCTCATATACAGCTGTGGTAATGCTGTGCG  
>HPV10\_Alpha\_9627257\_nt373\_E6\_VE\_rc|1  
TACCAGCGGTTTGTGACACATGTAGCATCTGATCAGCTGTGTATATATAGATTGTTTGGT  
>HPV26\_Alpha\_9627305\_nt488\_E6\_VE\_rc|1  
CACTTGTGTTTCTGTTTGGCGCCTTGGTCTCCAACAATTTGTACACAACCTTTCCACTG  
>HPV97\_Alpha\_71726694\_nt32\_E6\_VE\_rc|1  
TATCTCTATTTCAAGTAATGAAGTATTCAATTCGTGTGCACAGGTCTGGCAACTTGTAGGG  
>HPV107\_Beta\_126131393\_nt320\_E6\_VE\_rc|1  
GCAAAATTTGCAAGGTACCAGTAAGTCTTCCACTGGTATATTAAGATGCTGTGTAAGCTG  
>HPV26\_Alpha\_9627305\_nt98\_E6\_VE\_rc|1  
ATTCAAGCTTTCACATAGCTCATGTAGCGTTCTGGGTCGTTCTCTAGGATCCTCGAACAT  
>HPV97\_Alpha\_71726694\_nt392\_E6\_VE\_rc|1  
AAGCCTTTCTTGCCGTGATTGGTTGTAACACGAATTGCACTGGCCTCTATAATAACCAGA



>HPV67\_Alpha\_3228267\_nt463\_E6\_VE\_rc|1  
CCAACACACTGAACACCGTCCTGTCCAACGATTGGAAATATTATGAAATCGCTTTTTTGC  
>HPV23\_Beta\_1020186\_nt471\_E6\_VE\_rc|1  
TATAGGTCGTTGCTCCTCCTGCTCAATTTACGACCATACACAGTTAGCTGATAAAATTG  
>HPV5\_Beta\_9627145\_nt561\_E6\_VE\_rc|1  
CCTCACCTTATGAAAGGAAGGCCTCTGCCACAGCAATCTAACTTTTCTATAATGTCAAG  
>HPV92\_Beta\_27531786\_nt257\_E6\_VE\_rc|1  
TGTTTTCTATTGCTGCTACTTGTTTTAGCACAAAGCACCACAGCAAGCATAAGCATAATTCTC  
>HPV83\_Alpha\_5059324\_nt212\_E6\_VE\_rc|1  
TGTTTTCTTCTTCTACTGTTGCCCGTAGCTTGAGTGGCTCCAGTGCCGTAGCTCTCGCAC  
>HPV12\_Beta\_396910\_nt561\_E6\_VE\_rc|1  
CCTGTCTCTAACCTTGTGGAACGGAAGGCCCGACCACAGCTGTCTAACTTTTCAATTGT  
>HPVcand86\_Alpha\_15741127\_nt362\_E6\_VE\_rc|1  
TGCTCTACAGTTGCTGCACTTTCCCGTCCACTGGCCTGCTATTTTATGAAAATGCAGATT  
>HPV15\_Beta\_396924\_nt351\_E6\_VE\_rc|1  
CTGCGCTGTAGCAAATGCACAACACTAGAACAACAGGCAAAAACAAAATCTTCCTCAGTCCA  
>HPV32\_Alpha\_9627327\_nt133\_E6\_VE\_rc|1  
GCAGATTTGTAAATTCCGCAGGGTCAGCCCCAAAATCTTGCACAATTGGTATAATGTACT  
>HPV30\_Alpha\_396973\_nt433\_E6\_VE\_rc|1  
TCTGTGAAACCGTTTCTTATATTCACAGTGTAACGTTTTTTCTCTGGTGTCAACGGCTG  
>HPV77\_Alpha\_2911558\_nt133\_E6\_VE\_rc|1  
CACACACAGTAGGCGAAGGTCGTCGAACGGTATTCCACTGTCTCTGCACAACAGGAATAT  
>HPV73\_Alpha\_1491692\_nt463\_E6\_VE\_rc|1  
GCACCGTGACAGCGTCCGGTCCACTGTTCTGCTATTTGATGAAACCGTTTTTTTTTCATC  
>HPV94\_Alpha\_40804528\_nt424\_E6\_VE\_rc|1  
GTACCCTGATATTTTGTGCAGTCGTCGCCGTTTCGTTACGATGTCTGTCTCTTCTTCCTT  
>HPV45\_Alpha\_397022\_nt433\_E6\_VE\_rc|1  
TATGCTGTGAAATCTTCGTTTGTCTTAAAGGTGTCTACGTTTTTCTGCTGGGTTCATGG  
>HPV97\_Alpha\_71726694\_nt2\_E6\_VE\_rc|1  
TTCTGTGCACAGGTCTGGCAACTTGTAGGGCCGTTTGCTTGATCTTCAAATCGCGCCAT  
>HPVcand89\_Alpha\_22095322\_nt272\_E6\_VE\_rc|1  
GCTGCCTAACGGCTTACAGCATATATAGCATCTCATATACAGCTGGGCCAACGGTGTGTT  
>HPV8\_Beta\_333074\_nt572\_E6\_VE\_rc|1  
GCAAACCTCCTTCCAGCCTCCTCTAACTTTATGAAAGGGACGGCCTCTCCCACAGCAATC  
>HPV61\_Alpha\_9628574\_nt463\_E6\_VE\_rc|1  
GCATGGCCCTCTACACTGGCAACACCTTCCCGTCCACTGTCCAGCTATATAGTGGAAGTG  
>HPV71\_Alpha\_12084981\_nt473\_E6\_VE\_rc|1  
GTAGGCAAGCACCGCGCCAATGGCCTGCTATTTTATGAAATCGCCTGCCTTCTGTAATTA  
>HPV2\_Alpha\_9626032\_nt390\_E6\_VE\_rc|1  
CTTCTCTCTCCAGCTCAGGGGCTTATGGCAAATATAGCATCTCATAAACAGCTGAGGTAT  
>HPV107\_Beta\_126131393\_nt650\_E6\_VE\_rc|1  
TTCTATCGCCTCACAAATGTCTACACAATCCCTTCCAATTACCTCTCACCTTAAAAAACTG  
>HPV72\_Alpha\_1491683\_nt463\_E6\_VE\_rc|1  
CCCTCTACACTGGCAGCACCTTCCCGTCCACAGTCCGCTTATCTTGTGGAAGTGGATTCC  
>HPV69\_Alpha\_6970418\_nt463\_E6\_VE\_rc|1  
CCAGCAGTTTGTGCACAACCTTTCCAGTACCCTGCTATTTTCATGGAACCGTCGCTTTTC  
>HPV17\_Beta\_396932\_nt561\_E6\_VE\_rc|1  
TATCGACCCACAATGTCTGCACAAGCCTTTCCAATTGCGTCTAACCTTATGAAACTGCTG  
>HPV38\_Beta\_1020234\_nt351\_E6\_VE\_rc|1  
TTGAGCAGAAGCATAAGCACAACTGCTACAACATGCAAAAACAAAATCCTCTTGAGTCCA  
>HPV59\_Alpha\_557236\_nt476\_E6\_VE\_rc|1  
CACCAGTGTTTCTACTACGCGCTTGTCGTTGCTGTCTTAGGTGTCTTGCTCGGGTCCGACA  
>HPV68a\_Alpha\_71726685\_nt2\_E6\_VE\_rc|1  
TGTCCTGCACAGGTCTGGCAATTTGTATGGCCGTTCTCAGGGTTGTGAAATAGCGCCAT  
>HPVcand87\_Alpha\_14475578\_nt388\_E6\_VE\_rc|1

CTTCTCGGGCCAGCACAAATGGTTTGCAGCATGCATGGCACCTTATATTTTGAAGTGCCAA  
>HPV72\_Alpha\_1491683\_nt253\_E6\_VE\_rc|1  
AGTTGCTCTTGCAAGGCATGGTGCAGACTCCAAATGGCCAGTTGTCCCGCCACACAAT  
>HPV84\_Alpha\_12958167\_nt2\_E6\_VE\_rc|1  
CACCTCGTATTCCCTGGCACAGCACAAAAATATTGGTGGGGTGGTAGCGTCCGTTGGGCAT  
>HPVcand62\_Alpha\_39932599\_nt362\_E6\_VE\_rc|1  
TCCTCTACAATTGCGGTACCGTCTGTCCACACTCCTGCTATTTTGTGGAAGTGCACTCC  
>HPV8\_Beta\_333074\_nt846\_E7\_AOS|1  
TACGTCTTTTTGTCAACGCAACTGATTTCGGGTATCAGGACCTTTCAAGAATTGCTGTTCA  
>HPV51\_Alpha\_333087\_nt756\_E7\_AOS|1  
CAAGTGTAGTACAACCTGGCAGTGGAAAGCAGTGGAGACACCCTTCGCGTTGTACAGCAGA  
>HPV51\_Alpha\_333087\_nt716\_E7\_AOS|1  
GCTACGTGTTACAGAATTGAAGCTCCGTGTTGCAGGTGTTCAAGTGAGTACAACCTGGCA  
>HPV20\_Beta\_1020162\_nt893\_E7\_AOS|1  
TCTTTATAAGCGCTACAGAATTTGCTATTAGAAGCTTTCAACAATTGCTGATTGACGAGC  
>HPV20\_Beta\_1020162\_nt881\_E7\_AOS|1  
TGAAACTTCGCATCTTTATAAGCGCTACAGAATTTGCTATTAGAAGCTTTCAACAATTGC  
>HPV22\_Beta\_1020178\_nt847\_E7\_AOS|1  
ACTCTCTCTGGAATTCGCGACTTTCAAACATCTCTACTTGGACCTGTAAACTTTTTGTGT  
>HPV22\_Beta\_1020178\_nt841\_E7\_AOS|2  
CTAGCAACTCTCTCTGGAATTCGCGACTTTCAAACATCTCTACTTGGACCTGTAAACTT  
>HPV22\_Beta\_1020178\_nt835\_E7\_AOS|1  
TATATACTAGCAACTCTCTCTGGAATTCGCGACTTTCAAACATCTCTACTTGGACCTGTA  
>HPV22\_Beta\_1020178\_nt829\_E7\_AOS|2  
AAGCTGTATATACTAGCAACTCTCTCTGGAATTCGCGACTTTCAAACATCTCTACTTGGAA  
>HPV22\_Beta\_1020178\_nt823\_E7\_AOS|1  
AAGCTGAAGCTGTATATACTAGCAACTCTCTCTGGAATTCGCGACTTTCAAACATCTCTA  
>HPV22\_Beta\_1020178\_nt817\_E7\_AOS|1  
GATACAAAGCTGAAGCTGTATATACTAGCAACTCTCTCTGGAATTCGCGACTTTCAAACA  
>HPV22\_Beta\_1020178\_nt811\_E7\_AOS|1  
GGTTGTGATACAAAGCTGAAGCTGTATATACTAGCAACTCTCTCTGGAATTCGCGACTTT  
>HPV22\_Beta\_1020178\_nt800\_E7\_AOS|1  
TATATTGTGGGGTTGTGATACAAAGCTGAAGCTGTATATACTAGCAACTCTCTCTGGAA  
>HPV22\_Beta\_1020178\_nt794\_E7\_AOS|1  
TTGTAGTATATTGTGGGGTTGTGATACAAAGCTGAAGCTGTATATACTAGCAACTCTCT  
>HPV23\_Beta\_1020186\_nt877\_E7\_AOS|1  
ATTCGCTCGTTCCAAGCATCTTTGCTAGAAAACGTGAAGCTGGTGTGTCTGCCTGTCTGA  
>HPV23\_Beta\_1020186\_nt867\_E7\_AOS|1  
AGATTTTGGGAATTCGCTCGTTCCAAGCATCTTTGCTAGAAAACGTGAAGCTGGTGTGTCC  
>HPV23\_Beta\_1020186\_nt857\_E7\_AOS|1  
TGCTAGCCACAGATTTTGGGAATTCGCTCGTTCCAAGCATCTTTGCTAGAAAACGTGAAGC  
>HPV23\_Beta\_1020186\_nt847\_E7\_AOS|1  
AAGCTTTACGTGCTAGCCACAGATTTTGGGAATTCGCTCGTTCCAAGCATCTTTGCTAGAA  
>HPV23\_Beta\_1020186\_nt837\_E7\_AOS|1  
GACACAGTTAAAGCTTTACGTGCTAGCCACAGATTTTGGGAATTCGCTCGTTCCAAGCATC  
>HPV23\_Beta\_1020186\_nt827\_E7\_AOS|1  
GAGGCTGTGAGACACAGTTAAAGCTTTACGTGCTAGCCACAGATTTTGGGAATTCGCTCGT  
>HPV28\_Alpha\_1020202\_nt573\_E7\_AOS|1  
ACGTCCCAGTGCAATGCAATGTGCAATTAGATGAAGAAGATTATACAAATGTGGAGGAAC  
>HPV28\_Alpha\_1020202\_nt715\_E7\_AOS|1  
AGATATAAGGCATTGGAGCAGCTCCTGTTGGGCACACTGACGGTCGTGTGCCCTCGCTG  
>HPV36\_Beta\_1020218\_nt861\_E7\_AOS|1  
TTTGTCCAAGCTACAGAATTTGGCATCAGAGCATTTCAACAGTTGCTGACCGGTGACCTG  
>HPV36\_Beta\_1020218\_nt853\_E7\_AOS|1  
TCCGCGTTTTTGTCCAAGCTACAGAATTTGGCATCAGAGCATTTCAACAGTTGCTGACCG

>HPV36\_Beta\_1020218\_nt847\_E7\_AOS|1  
TCAAGCTCCGCGTTTTTGTCCAAGCTACAGAATTTGGCATCAGAGCATTTCAACAGTTGC  
>HPV37\_Beta\_1020226\_nt803\_E7\_AOS|1  
TAGTTGTTGCAACGCCTATTGGAATTAGATCACAAGAAGAGCTATTACTTGGTGAAGTGC  
>HPV37\_Beta\_1020226\_nt812\_E7\_AOS|1  
CAACGCCTATTGGAATTAGATCACAAGAAGAGCTATTACTTGGTGAAGTGCAGCTGGTTT  
>HPV37\_Beta\_1020226\_nt794\_E7\_AOS|1  
TACGACTGATAGTTGTTGCAACGCCTATTGGAATTAGATCACAAGAAGAGCTATTACTTG  
>HPV37\_Beta\_1020226\_nt785\_E7\_AOS|1  
GTTCTAAACTACGACTGATAGTTGTTGCAACGCCTATTGGAATTAGATCACAAGAAGAGC  
>HPV38\_Beta\_1020234\_nt752\_E7\_AOS|1  
CAGCATACACCCCATACAAAATCATAGTTCTTTGTGGGGGTTGTGAAGTAAGGCTAAAAC  
>HPV66\_Alpha\_1020290\_nt592\_E7\_AOS|1  
GTTGCAAGAGGTTATATTAGAACTTGCACCGCAAACGGAAATTGACCTACAATGCAATGA  
>HPV66\_Alpha\_1020290\_nt585\_E7\_AOS|1  
TACCAACGTTGCAAGAGGTTATATTAGAACTTGCACCGCAAACGGAAATTGACCTACAAT  
>HPV103\_Unclassified\_109390382\_nt171\_E7\_AOS|1  
GTCATTGTGTATGTATGTGGTAGCCACGGAGGAGGCATTAGAAACTTTGAACAACAGCT  
>HPV103\_Unclassified\_109390382\_nt165\_E7\_AOS|1  
TGAGAAGTCATTGTGTATGTATGTGGTAGCCACGGAGGAGGGCATTAGAACTTTGAACA  
>HPV103\_Unclassified\_109390382\_nt159\_E7\_AOS|1  
GTATTGTGAGAAGTCATTGTGTATGTATGTGGTAGCCACGGAGGAGGGCATTAGAACTT  
>HPV103\_Unclassified\_109390382\_nt153\_E7\_AOS|1  
TTGCAAGTATTGTGAGAAGTCATTGTGTATGTATGTGGTAGCCACGGAGGAGGGCATTAG  
>HPV103\_Unclassified\_109390382\_nt147\_E7\_AOS|1  
GACAGATTGCAAGTATTGTGAGAAGTCATTGTGTATGTATGTGGTAGCCACGGAGGAGGG  
>HPV101\_Unclassified\_109390389\_nt151\_E7\_AOS|2  
TGTGGGCAGTGTCACAAAACCTTAGCATTACATGTACTAGCTACGGACGGGGCAATAAGG  
>HPV101\_Unclassified\_109390389\_nt162\_E7\_AOS|1  
TCACAAAACCTTAGCATTACATGTACTAGCTACGGACGGGGCAATAAGGCTCTGTGGAACA  
>HPV70\_Alpha\_1173493\_nt804\_E7\_AOS|1  
TAATACTACACTGCACTTAGTAGTAGAAGCCTCACAAGAGAACCTGCGATCTCTACTGCA  
>HPV71\_Alpha\_12084981\_nt739\_E7\_AOS|1  
CTTGTGGTGGAAGCGACGAAGCAGACATAAGAGCGCTTCAACAGCTGTTACTGGGCACA  
>HPV71\_Alpha\_12084981\_nt729\_E7\_AOS|1  
TGCAGTTAGGCTTGTGGTGGAAAGCGACGAAGCAGACATAAGAGCGCTTCAACAGCTGTT  
>HPV84\_Alpha\_12958167\_nt437\_E7\_AOS|1  
GCCAACGTTAAAGGATATTATTTTAACAGATATACCAGATGTAGTTAGTTTATACTGTGA  
>HPV84\_Alpha\_12958167\_nt427\_E7\_AOS|1  
GCGGCCAGACGCCAACGTTAAAGGATATTATTTTAACAGATATACCAGATGTAGTTAGTT  
>HPV107\_Beta\_126131393\_nt885\_E7\_AOS|1  
TGTCCAGTGAAACTTCGTCTCTACGTTTTTGCACCCATTTTGGCATTCGGGCATTGCAG  
>HPV107\_Beta\_126131393\_nt879\_E7\_AOS|1  
TCTGGGTGTCCAGTGAAACTTCGTCTCTACGTTTTTGCACCCATTTTGGCATTCGGGCA  
>HPV107\_Beta\_126131393\_nt873\_E7\_AOS|1  
CCTTGTCTGCGGTGTCCAGTGAAACTTCGTCTCTACGTTTTTGCACCCATTTTGGCATT  
>HPV107\_Beta\_126131393\_nt867\_E7\_AOS|1  
GTAGTACCTTGTCTGCGGTGTCCAGTGAAACTTCGTCTCTACGTTTTTGCACCCATTTT  
>HPV107\_Beta\_126131393\_nt861\_E7\_AOS|2  
AAAATTGTAGTACCTTGTCTGCGGTGTCCAGTGAAACTTCGTCTCTACGTTTTTGCACCC  
>HPV72\_Alpha\_1491683\_nt623\_E7\_AOS|1  
TCAGAGTCAGAGGATGAGAGGGACGGTGTGGTGTGCAGGAGCAACTTGTAGAACAAGCA  
>HPV72\_Alpha\_1491683\_nt617\_E7\_AOS|1  
TCAGAGTCAGAGTCAGAGGATGAGAGGGACGGTGTGGTGTGCAGGAGCAACTTGTAGAA  
>HPV72\_Alpha\_1491683\_nt607\_E7\_AOS|1

ACTAGACAGCTCAGAGTCAGAGTCAGAGGATGAGAGGGACGGTGTGGTGTGCAGGAGCA  
>HPV73\_Alpha\_1491692\_nt719\_E7\_AOS|1  
GCACGAAGTGTCACTGCACAGTATGCCTTGCCATTGAAAGCAACAAAGCTGATTTAAGAG  
>HPV73\_Alpha\_1491692\_nt736\_E7\_AOS|1  
ACAGTATGCCTTGCCATTGAAAGCAACAAAGCTGATTTAAGAGTGATAGAAGAGTTGCTT  
>HPVcand86\_Alpha\_15741127\_nt431\_E7\_AOS|1  
CCAGACGCCGACCATAAAAGATATAGTGTTATGTGAAATACCAGATGTAGTTAACCTACA  
>HPVcand86\_Alpha\_15741127\_nt441\_E7\_AOS|1  
ACCATAAAAGATATAGTGTTATGTGAAATACCAGATGTAGTTAACCTACATTGTGACGAG  
>HPV88\_Gamma\_167600365\_nt644\_E7\_AOS|1  
ATACCAGTTGCGCCTTCTGTGAAGCAGGTGTAAGGGTATTTGTTCTAGCTTCACCAGCCG  
>HPV110\_Beta\_186461194\_nt742\_E7\_AOS|1  
CTTGTGGCCTTTGTGGTGC GCGACTTCGGCTTTTTGTGCTTGCAACAGTTTTTGG AATTC  
>HPV110\_Beta\_186461194\_nt733\_E7\_AOS|1  
TTGTTGCTGCTTGTGGCCTTTGTGGTGC GCGACTTCGGCTTTTTGTGCTTGCAACAGTTT  
>HPV110\_Beta\_186461194\_nt724\_E7\_AOS|1  
CTTACAAGATTGTTGCTGCTTGTGGCCTTTGTGGTGC GCGACTTCGGCTTTTTGTGCTTG  
>HPV111\_Beta\_186461202\_nt760\_E7\_AOS|1  
TGCTACGGAACCTTGAATAAGAGCCCAACAAGA ACTATTACTGGGTGAAGTACAGCTTGT  
>HPV111\_Beta\_186461202\_nt752\_E7\_AOS|1  
TACGTCTTTGCTACGGAACCTTGAATAAGAGCCCAACAAGA ACTATTACTGGGTGAAGTA  
>HPV111\_Beta\_186461202\_nt744\_E7\_AOS|1  
TTCGCTTATACGTCTTTGCTACGGAACCTTGAATAAGAGCCCAACAAGA ACTATTACTGG  
>HPV111\_Beta\_186461202\_nt736\_E7\_AOS|1  
TACAAGACTTCGCTTATACGTCTTTGCTACGGAACCTTGAATAAGAGCCCAACAAGA ACT  
>HPVFA75/KI88-03\_Unclassified\_206902429\_nt765\_E7\_AOS|2  
TTCGACTATTTGTGATTGCTACCTTCTTTGGAATCCGCACACAGCAAGA ACTTTTAATTC  
>HPVFA75/KI88-03\_Unclassified\_206902429\_nt758\_E7\_AOS|1  
GCTCGCCTTCGACTATTTGTGATTGCTACCTTCTTTGGAATCCGCACACAGCAAGA ACTT  
>HPVFA75/KI88-03\_Unclassified\_206902429\_nt751\_E7\_AOS|1  
TTGTGGCGCTCGCCTTCGACTATTTGTGATTGCTACCTTCTTTGGAATCCGCACACAGCA  
>HPVFA75/KI88-03\_Unclassified\_206902429\_nt744\_E7\_AOS|1  
GTGGTGGTTGTGGCGCTCGCCTTCGACTATTTGTGATTGCTACCTTCTTTGGAATCCGCA  
>HPVFA75/KI88-03\_Unclassified\_206902429\_nt737\_E7\_AOS|1  
GCTCCTTGTGGTGGTTGTGGCGCTCGCCTTCGACTATTTGTGATTGCTACCTTCTTTGGA  
>HPVFA75/KI88-03\_Unclassified\_206902429\_nt730\_E7\_AOS|1  
GATAGTTGCTCCTTGTGGTGGTTGTGGCGCTCGCCTTCGACTATTTGTGATTGCTACCTT  
>HPV91\_Alpha\_22023568\_nt746\_E7\_AOS|1  
GGACCTACAAGTTTACAAAGTTGTAACCGAGTGCACCTCTTGTTATTGTTCAATTCGTCT  
>HPVcand89\_Alpha\_22095322\_nt604\_E7\_AOS|1  
GTGTGTGCTATCGTGCAGTTAGGTTAGTAGTATTGTCTGACGACGCACATCTAAGACATC  
>HPV90\_Alpha\_22138122\_nt439\_E7\_AOS|1  
CAACCTTAAAGGACATATTTCTAGAGCTGGATCAGCCTGATGCGGTTGACCTACATTGTA  
>HPV58\_Alpha\_222386\_nt783\_E7\_AOS|1  
CAACAGTACAACAACCGACGTACGAACCCTACAGCAGCTGCTTATGGGCACATGTACCAT  
>HPV58\_Alpha\_222386\_nt768\_E7\_AOS|1  
GGTTCGTTTGTGTATCAACAGTACAACAACCGACGTACGAACCCTACAGCAGCTGCTTAT  
>HPV58\_Alpha\_222386\_nt744\_E7\_AOS|1  
TTGTTGTTACACTTGTGGCACCACGGTTCGTTTGTGTATCAACAGTACAACAACCGACGT  
>HPV74\_Alpha\_27462483\_nt631\_E7\_AOS|1  
GTACAGGACCAGACATCAACAATCTACATACGCTTCTACTGGGTACACTGAGCCTAGTGT  
>HPV74\_Alpha\_27462483\_nt646\_E7\_AOS|1  
TCAACAATCTACATACGCTTCTACTGGGTACACTGAGCCTAGTGTGTCTCTGTGCGCGC  
>HPV74\_Alpha\_27462483\_nt559\_E7\_AOS|1  
AACATACACAGCCTTACCAAATAGTAACCTGCTGTTGTGTGTGTAATCGCAGCCTTCGGC

>HPV92\_Beta\_27531786\_nt662\_E7\_AOS|1  
TTCCTCGTGTGGTGGCTGCGGAATTAAGCTTCGAATTTTTGCATCGTGTACCCAATTTGG  
>HPV92\_Beta\_27531786\_nt654\_E7\_AOS|1  
AAGATAGTTTCCTCGTGTGGTGGCTGCGGAATTAAGCTTCGAATTTTTGCATCGTGTACC  
>HPV75\_Beta\_2911544\_nt847\_E7\_AOS|1  
ACTTTGCTGTTGGAGGAGCTGCAATTCCTGTGTCTGAGTGTCTGGAAGAAATTCGACAT  
>HPV75\_Beta\_2911544\_nt839\_E7\_AOS|1  
AATTTCAAACCTTTGCTGTTGGAGGAGCTGCAATTCCTGTGTCTGAGTGTCTGGAAGAAA  
>HPV75\_Beta\_2911544\_nt830\_E7\_AOS|1  
CTATTCGAGAATTTCAAACCTTTGCTGTTGGAGGAGCTGCAATTCCTGTGTCTGAGTGTCT  
>HPV75\_Beta\_2911544\_nt815\_E7\_AOS|1  
TTGCTACTGATCGGGCTATTCGAGAATTTCAAACCTTTGCTGTTGGAGGAGCTGCAATTCC  
>HPV75\_Beta\_2911544\_nt808\_E7\_AOS|1  
TTTGTGCTTGCTACTGATCGGGCTATTCGAGAATTTCAAACCTTTGCTGTTGGAGGAGCTG  
>HPV76\_Beta\_2911551\_nt846\_E7\_AOS|1  
ATCTTTACTGCTAGAGGAGTTGCAATTCCTGTGTCCGGAGTGTCTGGAAGAGATTCGCAA  
>HPV80\_Beta\_2911565\_nt797\_E7\_AOS|1  
TAATAGTGGTTGCAACTTCTTTTGGGAATTCGCGCACAGAAGAGTTACTATTTGGAGAAG  
>HPVTRX7\_Unclassified\_30315616\_nt862\_E7\_AOS|1  
CGTGTCTTTGTCAACGCAACTGAACCTTGCTATTAGAACCCTGCAGGAACCTACTGACCAGC  
>HPVTRX7\_Unclassified\_30315616\_nt882\_E7\_AOS|1  
TGAACCTGGTATTAGAACCCTGCAGGAACCTACTGACCAGCGATCTGCAGCTGCTGTGTCC  
>HPVTRX7\_Unclassified\_30315616\_nt875\_E7\_AOS|1  
ACGCAACTGAACTTGGTATTAGAACCCTGCAGGAACCTACTGACCAGCGATCTGCAGCTGC  
>HPV65\_Gamma\_312100\_nt702\_E7\_AOS|1  
GGATTACTCTGTTTGTCTGTGGAATTTGGACTTCGAGCGTTGGAACAACCTCATAGTGGACG  
>HPV65\_Gamma\_312100\_nt684\_E7\_AOS|1  
GATGTGAAGTTAATGTAAGGATTACTCTGTTTGTCTGTGGAATTTGGACTTCGAGCGTTGG  
>HPV67\_Alpha\_3228267\_nt720\_E7\_AOS|1  
ATTACCATATTGTTACTGTGTGTAACATCTGTGAGTGCACCTTTGCGTTTGTGCATTACACA  
>HPV67\_Alpha\_3228267\_nt725\_E7\_AOS|1  
CATATTGTTACTGTGTGTAACATCTGTGAGTGCACCTTTGCGTTTGTGCATTACAGTACA  
>HPV67\_Alpha\_3228267\_nt715\_E7\_AOS|1  
AACCAATTACCATATTGTTACTGTGTGTAACATCTGTGAGTGCACCTTTGCGTTTGTGCAT  
>HPV67\_Alpha\_3228267\_nt710\_E7\_AOS|1  
GATACAACCAATTACCATATTGTTACTGTGTGTAACATCTGTGAGTGCACCTTTGCGTTTG  
>HPV67\_Alpha\_3228267\_nt705\_E7\_AOS|1  
AACCAGATACAACCAATTACCATATTGTTACTGTGTGTAACATCTGTGAGTGCACCTTTGC  
>HPV11\_Alpha\_333026\_nt739\_E7\_AOS|1  
GTGCACAGACGGAGACATCAGACAACCTACAAGACCTTTTGCTGGGCACACTAAATATTGT  
>HPV11\_Alpha\_333026\_nt728\_E7\_AOS|1  
CTGGTTGTGGAGTGCACAGACGGAGACATCAGACAACCTACAAGACCTTTTGCTGGGCACA  
>HPV31\_Alpha\_333048\_nt696\_E7\_AOS|1  
AACCGGACACATCCAATTACAATATCGTTACCTTTTGTGTCAGTGTAAGTCTACACTTC  
>HPV31\_Alpha\_333048\_nt743\_E7\_AOS|1  
AAGTCTACACTTCGTTTGTGTGTACAGAGCACACAAGTAGATATTCGCATATTGCAAGAG  
>HPV31\_Alpha\_333048\_nt733\_E7\_AOS|1  
TTGTCTAGTGAAGTCTACACTTCGTTTGTGTGTACAGAGCACACAAGTAGATATTCGCAT  
>HPV31\_Alpha\_333048\_nt720\_E7\_AOS|1  
TCGTTACCTTTTGTGTCAGTGTAAGTCTACACTTCGTTTGTGTGTACAGAGCACACAAG  
>HPV31\_Alpha\_333048\_nt709\_E7\_AOS|1  
CAATTACAATATCGTTACCTTTTGTGTCAGTGTAAGTCTACACTTCGTTTGTGTGTACA  
>HPV33\_Alpha\_333049\_nt763\_E7\_AOS|1  
CAGTTCGTTTATGTGTCAACAGTACAGCAAGTGACCTACGAACCATACAGCAACTACTTA  
>HPV33\_Alpha\_333049\_nt746\_E7\_AOS|1

TCACACTTGTAACACCACAGTTCGTTTATGTGTCAACAGTACAGCAAGTGACCTACGAAC  
>HPV33\_Alpha\_333049\_nt736\_E7\_AOS|1  
TAACCTGTTGTCACTTGTAACACCACAGTTCGTTTATGTGTCAACAGTACAGCAAGTG  
>HPV35\_Alpha\_333050\_nt757\_E7\_AOS|1  
CTACGTCTGTGTGTACAGAGCACACACATTGACATACGTAAATTGGAAGATTTATTAATG  
>HPV35\_Alpha\_333050\_nt752\_E7\_AOS|1  
CGACACTACGTCTGTGTGTACAGAGCACACACATTGACATACGTAAATTGGAAGATTTAT  
>HPV47\_Beta\_333062\_nt874\_E7\_AOS|1  
GAACGCAACAAACCGTGGCATCAGGACATTTTCAGGAACTTTTGACTGGTGATCTGCAGCT  
>HPV47\_Beta\_333062\_nt867\_E7\_AOS|1  
TTTTTGTGAACGCAACAAACCGTGGCATCAGGACATTTTCAGGAACTTTTGACTGGTGATC  
>HPV42\_Alpha\_333211\_nt491\_E7\_AOS|1  
TCAATTTATATTGTGTCTAGTGGACGGGTCGGTGTACGCATTGCAGAGGACAATGCGTGGA  
>HPV42\_Alpha\_333211\_nt481\_E7\_AOS|1  
GTACAAGATTTCAATTTATATTGTGTCTAGTGGACGGGTCGGTGTACGCATTGCAGAGGAC  
>HPV39\_Alpha\_333245\_nt804\_E7\_AOS|1  
TAACAACACACTGCAGCTGGTAGTAGAAGCCTCACGGGATACTCTGCGACAACCTACAGCA  
>HPV93\_Beta\_37089393\_nt684\_E7\_AOS|1  
AGATTATTGTGTTCTGCGGCGGAGGCTGTGGATCCCGACTTCGAATATTTGTTGCTGCCA  
>HPV93\_Beta\_37089393\_nt674\_E7\_AOS|1  
ACAGCTTTCAAGATTATTGTGTTCTGCGGCGGAGGCTGTGGATCCCGACTTCGAATATTT  
>HPV12\_Beta\_396910\_nt860\_E7\_AOS|1  
TATTTTTGTCAACGCAACTGATACTGGCATTAGGACCCTACAGGACCTGCTGATCAGTGA  
>HPV12\_Beta\_396910\_nt880\_E7\_AOS|1  
ATACTGGCATTAGGACCCTACAGGACCTGCTGATCAGTGACCTGCAGCTGCTGTGCCAG  
>HPV12\_Beta\_396910\_nt872\_E7\_AOS|1  
CGCAACTGATACTGGCATTAGGACCCTACAGGACCTGCTGATCAGTGACCTGCAGCTGCT  
>HPV15\_Beta\_396924\_nt798\_E7\_AOS|1  
TATAGTGGTTGCAACTCCATTTGGAATTCGCTCACAACAAGACTTATTATTGGAAGAAGT  
>HPV15\_Beta\_396924\_nt811\_E7\_AOS|1  
ACTCCATTTGGAATTCGCTCACAACAAGACTTATTATTGGAAGAAGTTAAGTTGGTGTGT  
>HPV17\_Beta\_396932\_nt810\_E7\_AOS|1  
TCTTGCAACGCACGCTGGAATTCGTTTACAAGAGGAGCTTTTATTAGGTGAAGTACAGTT  
>HPV17\_Beta\_396932\_nt801\_E7\_AOS|2  
GCTTATTGTTCTTGCAACGCACGCTGGAATTCGTTTACAAGAGGAGCTTTTATTAGGTGA  
>HPV17\_Beta\_396932\_nt792\_E7\_AOS|1  
TAAGCTACGGCTTATTGTTCTTGCAACGCACGCTGGAATTCGTTTACAAGAGGAGCTTTT  
>HPV19\_Beta\_396940\_nt904\_E7\_AOS|1  
AATTTGGTATTAGAACCTACAGGACATCCTGATTGAAGAATTGCAACTGTTGTGCCCGG  
>HPV19\_Beta\_396940\_nt898\_E7\_AOS|1  
CCACGCAATTTGGTATTAGAACCTACAGGACATCCTGATTGAAGAATTGCAACTGTTGT  
>HPV19\_Beta\_396940\_nt892\_E7\_AOS|1  
TGAAAGCCACGCAATTTGGTATTAGAACCTACAGGACATCCTGATTGAAGAATTGCAAC  
>HPV25\_Beta\_396948\_nt888\_E7\_AOS|1  
GATTTTGGTATTAGAACCTACAAAACCTTCTAATTGAAGAACTGCAGCTGTTGTGTCCG  
>HPV25\_Beta\_396948\_nt882\_E7\_AOS|1  
GCCACTGATTTGGTATTAGAACCTACAAAACCTTCTAATTGAAGAACTGCAGCTGTTG  
>HPV25\_Beta\_396948\_nt872\_E7\_AOS|1  
CTTTGTGAAAGCCACTGATTTTGGTATTAGAACCTACAAAACCTTCTAATTGAAGAACT  
>HPV30\_Alpha\_396973\_nt579\_E7\_AOS|1  
TAACAACATATCCAGAATATATTTTGGACCTTGTAACCGCAAACCTGAAATTGACCTGCATT  
>HPV30\_Alpha\_396973\_nt572\_E7\_AOS|1  
GGTAAAGTAACAACCTATTCCAGAATATATTTTGGACCTTGTAACCGCAAACCTGAAATTGAC  
>HPV3\_Alpha\_397005\_nt624\_E7\_AOS|1  
AAGATGAGTATATAAATGCTGTGGAACCAGCGCAACAAGCGTATTGTGTAGTCACAGTGT

>HPV40\_Alpha\_397014\_nt752\_E7\_AOS|1  
TGTTTGGTGCCTTAGCAGTGCATTGTTCCATCACTGATATAACACAGTTCAGCAGTTG  
>HPV40\_Alpha\_397014\_nt743\_E7\_AOS|1  
TTTTGTCAGTGTTTGGTGCCTTAGCAGTGCATTGTTCCATCACTGATATAACACAGTTC  
>HPV45\_Alpha\_397022\_nt615\_E7\_AOS|1  
AAATTGTATTGCATTTGGAACCTCAGAATGAATTAGATCCTGTTGACCTGTTGTGTTACG  
>HPV45\_Alpha\_397022\_nt793\_E7\_AOS|1  
TGACGGCAGAATTGAGCTTACAGTAGAGAGCTCGGCAGAGGACCTTAGAACACTACAGCA  
>HPV52\_Alpha\_397038\_nt752\_E7\_AOS|1  
TACGGCTATGCATTCATAGCACTGCGACGGACCTTCGTACTCTACAGCAAATGCTGTTGG  
>HPV52\_Alpha\_397038\_nt747\_E7\_AOS|1  
CACACTACGGCTATGCATTCATAGCACTGCGACGGACCTTCGTACTCTACAGCAAATGCT  
>HPV56\_Alpha\_397053\_nt592\_E7\_AOS|1  
GCTGCAAGACGTTGTATTAGAACTAACACCTCAAACAGAAATTGACCTACAGTGCAATGA  
>HPV56\_Alpha\_397053\_nt585\_E7\_AOS|1  
TACCAACGCTGCAAGACGTTGTATTAGAACTAACACCTCAAACAGAAATTGACCTACAGT  
>HPVcand62\_Alpha\_39932599\_nt645\_E7\_AOS|1  
GCAGAACTCAGACGGCTGCAACAACACTACTGACGGATGCACTGGAGATAGTGTGTCCCGGC  
>HPVcand62\_Alpha\_39932599\_nt602\_E7\_AOS|1  
TATTTGCAACTGTTTAGTTAGTTGGTTGGTGTAAAGTGGAGACGCAGAACTCAGACGGCT  
>HPV43\_Alpha\_40804474\_nt736\_E7\_AOS|1  
GCAGTGCTCTGACAGTGACATCAAGAAGCTAGAAGACCTGCTGTTGGGCACATTAAAAAT  
>HPV43\_Alpha\_40804474\_nt680\_E7\_AOS|1  
GTTTACAGAGTTGTAACAGAGTGACATCCTGTCTGTGTGTAATTCGACTTGTTGTGCAG  
>HPV43\_Alpha\_40804474\_nt671\_E7\_AOS|1  
AATCTACAAGTTTACAGAGTTGTAACAGAGTGACATCCTGTCTGTGTGTAATTCGACTT  
>HPV43\_Alpha\_40804474\_nt666\_E7\_AOS|1  
AAGTGAATCTACAAGTTTACAGAGTTGTAACAGAGTGACATCCTGTCTGTGTGTAATTC  
>HPV81\_Alpha\_40804509\_nt726\_E7\_AOS|1  
GTATTTGTAGGTGTTTAGTTAGGCTGGTGGTGTAAAGTGGAGACGCAGACCTGAGGCTGC  
>HPV81\_Alpha\_40804509\_nt773\_E7\_AOS|1  
GACCTGAGGCTGCTGCAACAACACTACTGACGGATACACTGTCCATAGTGTGTCCTGGCTGC  
>HPV81\_Alpha\_40804509\_nt545\_E7\_AOS|1  
CATGGCCAGGCAGCAACGATAAAGGACATTGTCCTAGATGAGTATCCTGATGTGATTGAC  
>HPV95\_Gamma\_40804520\_nt756\_E7\_AOS|1  
AACTTCTTCTGGAAGGGAAGGTGATATTTTGCTGTGTTGGGTGTGCAAGAAATCACAGCA  
>HPV95\_Gamma\_40804520\_nt762\_E7\_AOS|1  
TTCTGGAAGGGAAGGTGATATTTTGCTGTGTTGGGTGTGCAAGAAATCACAGCAGAAATG  
>HPV95\_Gamma\_40804520\_nt679\_E7\_AOS|1  
TACCTGTTGTTATAATTGTGAAGCAAATGTAAGAATCACTTTGTATGCTGTTGCATTTGG  
>HPVcand85\_Alpha\_4574720\_nt793\_E7\_AOS|1  
TAAATGTGAGGCCAGTCTGCAGTTAGTGGTGGAAAGTTCAGCAGCCGATCTACGAGATCT  
>HPVcand85\_Alpha\_4574720\_nt804\_E7\_AOS|1  
CCAGTCTGCAGTTAGTGGTGGAAAGTTCAGCAGCCGATCTACGAGATCTCCAGCAGCTGT  
>HPV96\_Beta\_50253426\_nt954\_E7\_AOS|1  
CCGGCTGAAAATCTACGTTTCTGCTACACAGTTTGGAAATTCGTTCTTTAGAAGACTTGCT  
>HPV96\_Beta\_50253426\_nt961\_E7\_AOS|1  
AAAATCTACGTTTCTGCTACACAGTTTGGAAATTCGTTCTTTAGAAGACTTGCTGCTAGAA  
>HPV96\_Beta\_50253426\_nt949\_E7\_AOS|1  
GATTCCCGGCTGAAAATCTACGTTTCTGCTACACAGTTTGGAAATTCGTTCTTTAGAAGAC  
>HPV96\_Beta\_50253426\_nt944\_E7\_AOS|1  
GCTGTGATTCCCGGCTGAAAATCTACGTTTCTGCTACACAGTTTGGAAATTCGTTCTTTAG  
>HPV96\_Beta\_50253426\_nt939\_E7\_AOS|1  
TGGAGGCTGTGATTCCCGGCTGAAAATCTACGTTTCTGCTACACAGTTTGGAAATTCGTTT  
>HPV96\_Beta\_50253426\_nt846\_E7\_AOS|1

AGAGTTGACAGAAGAGCAGTCAGAAAACCTGTCAGAATCTACAGTAGCAGAGGTGGAGCC  
>HPV96\_Beta\_50253426\_nt839\_E7\_AOS|1  
GTGACGAAGAGTTGACAGAAGAGCAGTCAGAAAACCTGTCAGAATCTACAGTAGCAGAGG  
>HPV83\_Alpha\_5059324\_nt440\_E7\_AOS|1  
AATAGCAGAGATTGTACTAGAAGAAATACCAGATATAGTTGACCTATATTGTAATGAACA  
>HPV83\_Alpha\_5059324\_nt450\_E7\_AOS|1  
ATTGTACTAGAAGAAATACCAGATATAGTTGACCTATATTGTAATGAACAAGGTATAGAC  
>HPV83\_Alpha\_5059324\_nt430\_E7\_AOS|1  
ATACAGCAACAATAGCAGAGATTGTACTAGAAGAAATACCAGATATAGTTGACCTATATT  
>HPV59\_Alpha\_557236\_nt746\_E7\_AOS|1  
AAGTGTAAATAATCAACTTCAGCTAGTAGTAGAAAACCTCGCAAGACGGATTGCGAGCCTTA  
>HPV6\_Alpha\_6002612\_nt742\_E7\_AOS|1  
GTACAGAAACAGACATCAGAGAAGTGCAACAGCTTCTGTTGGGAACACTAAACATAGTGT  
>HPV57\_Alpha\_60882\_nt728\_E7\_AOS|1  
TGCGGAGCGGCGGACATAAGGCATCTGGAGCAGCTGTTCTGAATACGTTGACCATAGTG  
>HPV69\_Alpha\_6970418\_nt816\_E7\_AOS|1  
GCGGTGGAGCAGCTGCTGATGGGCGACGTGAGTTTGGTGTGCCACCAGTGTGCTACATAC  
>HPV69\_Alpha\_6970418\_nt808\_E7\_AOS|1  
ACGTCCGAGCGGTGGAGCAGCTGCTGATGGGCGACGTGAGTTTGGTGTGCCACCAGTGTG  
>HPV69\_Alpha\_6970418\_nt790\_E7\_AOS|1  
TACTAAGCAGTCGACAGAACGTCCGAGCGGTGGAGCAGCTGCTGATGGGCGACGTGAGTT  
>HPV82\_Alpha\_6970427\_nt804\_E7\_AOS|1  
CATATTTTCAGCAAATGTTACTGGGCGACCTAAGCCTGGTGTGCCCCGTGGTGTGCGACCAA  
>HPV82\_Alpha\_6970427\_nt758\_E7\_AOS|1  
CGAGTGTTGTACAGCTCGCAGTGGAAGCAGTGAGACAGCCTTCGCATATTTTCAGCAA  
>HPV82\_Alpha\_6970427\_nt718\_E7\_AOS|1  
GATACGTGTTACAGAATTAAAGTGCACTGTTGCAGGTGTTTCAGTGTTGTACAGCTCGCA  
>HPV82\_Alpha\_6970427\_nt697\_E7\_AOS|1  
CCAGCCAGACAAGCTGGACAGGATACGTGTTACAGAATTAAAGTGCACTGTTGCAGGTGT  
>HPV68a\_Alpha\_71726685\_nt702\_E7\_AOS|1  
CAAGGCACTGCAACTAGTAGTAGAAGCGTCGCGGACAACCTGCGGACACTACAACAGCT  
>HPV97\_Alpha\_71726694\_nt514\_E7\_AOS|1  
AAATTATATTGCATTTGCAACCCCAAAATGAAATAAATTCGGCTGACCTCAATGTTATG  
>HPV97\_Alpha\_71726694\_nt499\_E7\_AOS|1  
AACCAACATTACAAGAAATTATATTGCATTTGCAACCCCAAAATGAAATAAATTCGGCTG  
>HPV106\_Alpha\_71726710\_nt480\_E7\_AOS|1  
CAACCAACCTTAAAGGACATCCTGTTAGAAATTGGATGAGCCAGATGTTGTTGACCTGCAT  
>HPV102\_Alpha\_71726718\_nt428\_E7\_AOS|1  
CCACGCAGCAACGATAGCAGATATAGTTTGTAGAAGAAATTACCAGATGTAATTGACCTGTA  
>HPV102\_Alpha\_71726718\_nt440\_E7\_AOS|1  
GATAGCAGATATAGTTTGTAGAAGAAATTACCAGATGTAATTGACCTGTATTGTAATGAGCA  
>HPV13\_Alpha\_85827580\_nt656\_E7\_AOS|1  
CCACGCAACATAGCACACTATTACAATGCTACCAAATACTAACGTCTGTAGTAAATGTT  
>HPV13\_Alpha\_85827580\_nt732\_E7\_AOS|1  
GGTGGTGGAGTGACAGGACCTGACATTCACGACCTACACGACCTACTGCTGGGCACGCT  
>HPV13\_Alpha\_85827580\_nt673\_E7\_AOS|1  
CTATTACAATGCTACCAAATACTAACGTCTGTAGTAAATGTTGTAGCAACGTCCGGCTG  
>HPV2\_Alpha\_9626032\_nt724\_E7\_AOS|1  
GTTGAGTGCGGACAAGCAGACCTAAGAGAGCTGGAACAGCTGTTCTTGAAGACGCTGACT  
>HPV2\_Alpha\_9626032\_nt736\_E7\_AOS|1  
CAAGCAGACCTAAGAGAGCTGGAACAGCTGTTCTTGAAGACGCTGACTCTAGTGTGCCCT  
>HPV41\_Nu\_9626041\_nt865\_E7\_AOS|1  
AGCAAGCAACACTGGGATACGGAATCTACAGGCACTCCTGGTCAACAGTCACCTTGACCT  
>HPV41\_Nu\_9626041\_nt855\_E7\_AOS|1  
TTGTATGCGTAGCAAGCAACACTGGGATACGGAATCTACAGGCACTCCTGGTCAACAGTC



>HPV41\_Nu\_9626041\_nt845\_E7\_AOS|1  
ATCATACGATTTGTATGCGTAGCAAGCAACACTGGGATACGGAATCTACAGGCACTCCTG  
>HPV41\_Nu\_9626041\_nt835\_E7\_AOS|1  
TTGCCAGGCTATCATACGATTTGTATGCGTAGCAAGCAACACTGGGATACGGAATCTACA  
>HPV41\_Nu\_9626041\_nt816\_E7\_AOS|1  
TAGAGAGTCAGTGTCCATTTTGCCAGGCTATCATACGATTTGTATGCGTAGCAAGCAACA  
>HPV41\_Nu\_9626041\_nt806\_E7\_AOS|1  
TTATACCTGGTAGAGAGTCAGTGTCCATTTTGCCAGGCTATCATACGATTTGTATGCGTA  
>HPV41\_Nu\_9626041\_nt796\_E7\_AOS|1  
CAGGAGAACATTATACCTGGTAGAGAGTCAGTGTCCATTTTGCCAGGCTATCATACGATT  
>HPV41\_Nu\_9626041\_nt786\_E7\_AOS|1  
TCCCCACACCCAGGAGAACATTATACCTGGTAGAGAGTCAGTGTCCATTTTGCCAGGCTA  
>HPV41\_Nu\_9626041\_nt776\_E7\_AOS|1  
GTGCAGCAAGTCCCCACACCCAGGAGAACATTATACCTGGTAGAGAGTCAGTGTCCATTT  
>HPV41\_Nu\_9626041\_nt766\_E7\_AOS|1  
GCGGGAACAGGTGCAGCAAGTCCCCACACCCAGGAGAACATTATACCTGGTAGAGAGTCA  
>HPV1\_Mu\_9626063\_nt657\_E7\_AOS|1  
GCAACCTTATGCTGTCTGCTTCCTGTGCCTATTGCGAGAACTGGTTCGATTGACCGT  
>HPV1\_Mu\_9626063\_nt684\_E7\_AOS|1  
TGCCTATTGCGAGAACTGGTTCGATTGACCGTCCTCGCGGATCACAGCGCCATTAGACA  
>HPV1\_Mu\_9626063\_nt675\_E7\_AOS|1  
TGCTTCCTGTGCCTATTGCGAGAACTGGTTCGATTGACCGTCCTCGCGGATCACAGCGC  
>HPV1\_Mu\_9626063\_nt666\_E7\_AOS|1  
TGCTGTCTGTTGCTTCCTGTGCCTATTGCGAGAACTGGTTCGATTGACCGTCCTCGCGGA  
>HPV1\_Mu\_9626063\_nt648\_E7\_AOS|1  
GTCGCCTCAGCAACCTTATGCTGTCTGCTTCCTGTGCCTATTGCGAGAACTGGTTCG  
>HPV18\_Alpha\_9626069\_nt810\_E7\_AOS|1  
TAGTAGTAGAAAGCTCAGCAGACGACCTTCGAGCATTCCAGCAGCTGTTTCTGAACACCC  
>HPV18\_Alpha\_9626069\_nt802\_E7\_AOS|1  
AATTGAGCTAGTAGTAGAAAGCTCAGCAGACGACCTTCGAGCATTCCAGCAGCTGTTTCT  
>HPV18\_Alpha\_9626069\_nt795\_E7\_AOS|1  
AAGCCAGAATTGAGCTAGTAGTAGAAAGCTCAGCAGACGACCTTCGAGCATTCCAGCAGC  
>HPV18\_Alpha\_9626069\_nt788\_E7\_AOS|1  
AAGTGTGAAGCCAGAATTGAGCTAGTAGTAGAAAGCTCAGCAGACGACCTTCGAGCATTC  
>HPV4\_Gamma\_9626597\_nt720\_E7\_AOS|1  
CTGCTGAGCTCGGACTACGGACCTTGAACAACCTTCTTGTAGAAGGAAAGCTGACGTTTT  
>HPV4\_Gamma\_9626597\_nt708\_E7\_AOS|1  
TTACATTGTATGCTGCTGAGCTCGGACTACGGACCTTGAACAACCTTCTTGTAGAAGGAA  
>HPV4\_Gamma\_9626597\_nt686\_E7\_AOS|1  
AGATGTGAAGTTGCTGTAAGAATTACATTGTATGCTGCTGAGCTCGGACTACGGACCTTG  
>HPV63\_Mu\_9626605\_nt697\_E7\_AOS|1  
CGATCAGCTGTTAAGGCTGACCTGCGTTTCTGACCTGTCTACTCTTACGCGTCTGGAGGA  
>HPV63\_Mu\_9626605\_nt690\_E7\_AOS|1  
GTTTGTGCGATCAGCTGTTAAGGCTGACCTGCGTTTCTGACCTGTCTACTCTTACGCGTC  
>HPV63\_Mu\_9626605\_nt683\_E7\_AOS|1  
CCTTGTGGTTTGTGCGATCAGCTGTTAAGGCTGACCTGCGTTTCTGACCTGTCTACTCTT  
>HPV63\_Mu\_9626605\_nt676\_E7\_AOS|1  
TGTGCTTCCTTGTGGTTTGTGCGATCAGCTGTTAAGGCTGACCTGCGTTTCTGACCTGTC  
>HPV63\_Mu\_9626605\_nt669\_E7\_AOS|1  
ATGCAATTGTGCTTCCTTGTGGTTTGTGCGATCAGCTGTTAAGGCTGACCTGCGTTTCTG  
>HPV63\_Mu\_9626605\_nt662\_E7\_AOS|1  
TATCCATATGCAATTGTGCTTCCTTGTGGTTTGTGCGATCAGCTGTTAAGGCTGACCTGC  
>HPV63\_Mu\_9626605\_nt655\_E7\_AOS|1  
GTCTGAATATCCATATGCAATTGTGCTTCCTTGTGGTTTGTGCGATCAGCTGTTAAGGCT  
>HPV63\_Mu\_9626605\_nt648\_E7\_AOS|1

AGGAGGAGTCTGAATATCCATATGCAATTGTGCTTCCTTGTGGTTTGTGCGATCAGCTGT  
>HPV16\_Alpha\_9627100\_nt744\_E7\_AOS|1  
TGACTCTACGCTTCGGTTGTGCGTACAAAGCACACACGTAGACATTCGTACTTTGGAAGA  
>HPV5\_Beta\_9627145\_nt795\_E7\_AOS|1  
AACGAAAGGATCTCTTACAAAGTTATAGCTCCGTGCGGTTGCAGGAACGTGAGGTCAAG  
>HPV5\_Beta\_9627145\_nt788\_E7\_AOS|1  
GCCTGACAACGAAAGGATCTCTTACAAAGTTATAGCTCCGTGCGGTTGCAGGAACGTGTA  
>HPV10\_Alpha\_9627257\_nt551\_E7\_AOS|1  
GATATCGAATTGAGTCTTGCACCAGAGGATATCCCTGTATGCAATGTGCAATTAGATGAA  
>HPV26\_Alpha\_9627305\_nt803\_E7\_AOS|1  
TTTCAGTGTCTGGAGCAGATGTTAATGGAAGACGTGTCCTTGGTGTGCCATCAGTGTGCTG  
>HPV26\_Alpha\_9627305\_nt782\_E7\_AOS|1  
TGCAGAGCAGTCGACAGAACGTTTCGAGTGTCTGGAGCAGATGTTAATGGAAGACGTGTCCT  
>HPV32\_Alpha\_9627327\_nt560\_E7\_AOS|1  
ATTATTTTGTATGACCTGCCAACGTGTGACCCGACAACGTGCGACACACCGCCGGTTGAC  
>HPV32\_Alpha\_9627327\_nt641\_E7\_AOS|2  
GACACCTCAGATGAAGATGATGAAGACGATGACCAACCTATAAAACAGGACATACAACGT  
>HPV34\_Alpha\_9627334\_nt741\_E7\_AOS|2  
TGTGTCTTACCATTGAGAGCACACACGCTGACCTATTAGTGTTAGAAGACCTGCTTATGG  
>HPV34\_Alpha\_9627334\_nt731\_E7\_AOS|1  
CAGTCCACAGTGTGTCTTACCATTGAGAGCACACACGCTGACCTATTAGTGTTAGAAGAC  
>HPV34\_Alpha\_9627334\_nt721\_E7\_AOS|2  
CAGCAGATGTCAGTCCACAGTGTGTCTTACCATTGAGAGCACACACGCTGACCTATTAGT  
>HPV34\_Alpha\_9627334\_nt711\_E7\_AOS|1  
TTACTGATTGCAGCAGATGTCAGTCCACAGTGTGTCTTACCATTGAGAGCACACACGCTG  
>HPV34\_Alpha\_9627334\_nt695\_E7\_AOS|1  
GCCTGGTACAGAATAGTTACTGATTGCAGCAGATGTCAGTCCACAGTGTGTCTTACCATT  
>HPV49\_Beta\_9627363\_nt805\_E7\_AOS|1  
CTGCGAGTCTTCGTGTTAGCCACTGACGCTGCTATTAGAAGTTTCCAAGAACTGCTTCTG  
>HPV49\_Beta\_9627363\_nt798\_E7\_AOS|1  
TGCCAGACTGCGAGTCTTCGTGTTAGCCACTGACGCTGCTATTAGAAGTTTCCAAGAACT  
>HPV49\_Beta\_9627363\_nt791\_E7\_AOS|1  
GATGCGGTGCCAGACTGCGAGTCTTCGTGTTAGCCACTGACGCTGCTATTAGAAGTTTCC  
>HPV53\_Alpha\_9627377\_nt581\_E7\_AOS|2  
GTACCAACACTTCCACAATATATTATAGAACTTATACCACAAACTGAGATTGACCTGCAA  
>HPV53\_Alpha\_9627377\_nt574\_E7\_AOS|1  
CGGTAACGTACCAACACTTCCACAATATATTATAGAACTTATACCACAAACTGAGATTGA  
>HPV7\_Alpha\_9627389\_nt758\_E7\_AOS|1  
GTTTCGCTAGTAGTCCATTGTACTGCTACTGATATAAGGCAGGTTTCATCAGTTGCTGATG  
>HPV9\_Beta\_9627396\_nt833\_E7\_AOS|2  
CAAATTTAGGAATTCGAGCGCAACAGGAACTTTGTCTGGGTGATATACAACCTGGTGTGTC  
>HPV9\_Beta\_9627396\_nt824\_E7\_AOS|1  
TGCTTGCTACAAATTTAGGAATTCGAGCGCAACAGGAACTTTGTCTGGGTGATATACAAC  
>HPV9\_Beta\_9627396\_nt815\_E7\_AOS|1  
GTTTATACGTGCTTGCTACAAATTTAGGAATTCGAGCGCAACAGGAACTTTGTCTGGGTG  
>HPV9\_Beta\_9627396\_nt800\_E7\_AOS|1  
GCGGTGCAAGACTTCGTTTATACGTGCTTGCTACAAATTTAGGAATTCGAGCGCAACAGG  
>HPV54\_Alpha\_9628437\_nt634\_E7\_AOS|1  
AGAAGATGAGACAGCAGTAACACAACCTGACAAACAAGCATTTAAGGTGTTAAGCCAGTG  
>HPV54\_Alpha\_9628437\_nt706\_E7\_AOS|1  
TTGTAAAGACAGTACGGCTATGTGTGTATAGCACGCACACAGGCATAAGGGTACTGCAGGA  
>HPV54\_Alpha\_9628437\_nt648\_E7\_AOS|1  
CAGTAACACAACCTGACAAACAAGCATTTAAGGTGTTAAGCCAGTGTGGAGGTGTGTGTT  
>HPV24\_Unclassified\_9628486\_nt726\_E7\_AOS|1  
GGTGGAGCCTGAAAGAAGAGCTTACAAAATAATACTTTGTTGCGGCGGCGGTTGTGGAAC

>HPV24\_Unclassified\_9628486\_nt645\_E7\_AOS|1  
ACAAGACATTGTCTTAGAGTTGACTGAGCCACAGACTGTTGATTTGCACTGTGAAGAGGA  
>HPV24\_Unclassified\_9628486\_nt635\_E7\_AOS|1  
AGGTCACCTCTACAAGACATTGTCTTAGAGTTGACTGAGCCACAGACTGTTGATTTGCACT  
>HPV48\_Gamma\_9628542\_nt734\_E7\_AOS|1  
TGAAAGAGCTTTGTTTATTTTGTCTGCGTGCTCCAGACAACCTCCCCGCAATGGCAGAT  
>HPV48\_Gamma\_9628542\_nt725\_E7\_AOS|1  
AACTGTTACTGAAAGAGCTTTGTTTATTTTGTCTGCGTGCTCCAGACAACCTCCCCGCA  
>HPV48\_Gamma\_9628542\_nt716\_E7\_AOS|1  
GTTTTTGAGCAACTGTTACTGAAAGAGCTTTGTTTATTTTGTCTGCGTGCTCCAGACAAC  
>HPV48\_Gamma\_9628542\_nt707\_E7\_AOS|1  
GAATACGTTGTTTGTAGCAACTGTTACTGAAAGAGCTTTGTTTATTTTGTCTGCGTGCT  
>HPV48\_Gamma\_9628542\_nt652\_E7\_AOS|1  
AAGTGTCACAATTGTGGCTGTGCGATAAGGGTGACAGTCGCTGCAACTGAATTTGGAATA  
>HPV48\_Gamma\_9628542\_nt643\_E7\_AOS|1  
ATAGACTCCAAGTGTCACAATTGTGGCTGTGCGATAAGGGTGACAGTCGCTGCAACTGAA  
>HPV48\_Gamma\_9628542\_nt634\_E7\_AOS|1  
CCGTACCGGATAGACTCCAAGTGTCACAATTGTGGCTGTGCGATAAGGGTGACAGTCGCT  
>HPV48\_Gamma\_9628542\_nt625\_E7\_AOS|1  
GAGTTTTGTCCGTACCGGATAGACTCCAAGTGTCACAATTGTGGCTGTGCGATAAGGGTG  
>HPV50\_Gamma\_9628550\_nt643\_E7\_AOS|1  
ATTGATTCTACGTGTAAGCATTGTCAATTGTGCGTTAGACTGTGTTGTGTCGCCACCGAC  
>HPV50\_Gamma\_9628550\_nt634\_E7\_AOS|1  
CCATTCAAGATTGATTCTACGTGTAAGCATTGTCAATTGTGCGTTAGACTGTGTTGTGTC  
>HPV50\_Gamma\_9628550\_nt625\_E7\_AOS|1  
GAAAGGTCACCATTCAAGATTGATTCTACGTGTAAGCATTGTCAATTGTGCGTTAGACTG  
>HPV50\_Gamma\_9628550\_nt616\_E7\_AOS|1  
GCAGAATCTGAAAGGTCACCATTCAAGATTGATTCTACGTGTAAGCATTGTCAATTGTGCG  
>HPV60\_Gamma\_9628566\_nt552\_E7\_AOS|1  
ATAACCTTGATGTAAATTTGGAGGAGTTGGTTTTACCTGTCAGTCTTTTAGCTGATGAGG  
>HPV60\_Gamma\_9628566\_nt542\_E7\_AOS|1  
CCTAATGTTAATAACCTTGATGTAAATTTGGAGGAGTTGGTTTTACCTGTCAGTCTTTTA  
>HPV60\_Gamma\_9628566\_nt532\_E7\_AOS|1  
TGGTAATCAGCCTAATGTTAATAACCTTGATGTAAATTTGGAGGAGTTGGTTTTACCTGT  
>HPV61\_Alpha\_9628574\_nt547\_E7\_AOS|1  
CATAGTCCTTGAAGAGCGTCCTGAGGTGGTTGACCTACATTGCAATGAGCAGTTATTAGA  
>HPV61\_Alpha\_9628574\_nt601\_E7\_AOS|1  
ATTAGACAGCTCAGAGTCAGAGGAGGAGGATAGTGTGCGTGAGCAACTTGTTGAACAAGC  
>HPV8\_Beta\_333074\_nt846\_E7\_AOS\_rc|1  
TGAACAGCAATTCTTGAAAGGTCCTGATACCCGAATCAGTTGCGTTGACAAAAAGACGTA  
>HPV51\_Alpha\_333087\_nt756\_E7\_AOS\_rc|1  
TCTGCTGTACAACGCGAAGGGTGTCTCCACTGCTTTCCACTGCCAGTTGTACTACACTTG  
>HPV51\_Alpha\_333087\_nt716\_E7\_AOS\_rc|1  
TGCCAGTTGTACTACACTTGAACACCTGCAACACGGAGCTTCAATTCTGTAACACGTAGC  
>HPV20\_Beta\_1020162\_nt893\_E7\_AOS\_rc|1  
GCTCGTCAATCAGCAATTGTTGAAAGCTTCTAATAGCAAATTCTGTAGCGCTTATAAAGA  
>HPV20\_Beta\_1020162\_nt881\_E7\_AOS\_rc|1  
GCAATTGTTGAAAGCTTCTAATAGCAAATTCTGTAGCGCTTATAAAGATGCGAAGTTTCA  
>HPV22\_Beta\_1020178\_nt847\_E7\_AOS\_rc|1  
ACACAAAAGTTTTACAGGTCCAAGTAGAGATGTTTGAAAGTCGCGAATTCCAGAGAGAGT  
>HPV22\_Beta\_1020178\_nt841\_E7\_AOS\_rc|2  
AAGTTTTACAGGTCCAAGTAGAGATGTTTGAAAGTCGCGAATTCCAGAGAGAGTTGCTAG  
>HPV22\_Beta\_1020178\_nt835\_E7\_AOS\_rc|1  
TACAGGTCCAAGTAGAGATGTTTGAAAGTCGCGAATTCCAGAGAGAGTTGCTAGTATATA  
>HPV22\_Beta\_1020178\_nt829\_E7\_AOS\_rc|2

TCCAAGTAGAGATGTTTGAAAGTCGCGAATTCCAGAGAGAGTTGCTAGTATATACAGCTT  
>HPV22\_Beta\_1020178\_nt823\_E7\_AOS\_rc|1  
TAGAGATGTTTGAAAGTCGCGAATTCCAGAGAGAGTTGCTAGTATATACAGCTTCAGCTT  
>HPV22\_Beta\_1020178\_nt817\_E7\_AOS\_rc|1  
TGTTTGAAAGTCGCGAATTCCAGAGAGAGTTGCTAGTATATACAGCTTCAGCTTTGTATC  
>HPV22\_Beta\_1020178\_nt811\_E7\_AOS\_rc|1  
AAAGTCGCGAATTCCAGAGAGAGTTGCTAGTATATACAGCTTCAGCTTTGTATCACAACC  
>HPV22\_Beta\_1020178\_nt800\_E7\_AOS\_rc|1  
TTCCAGAGAGAGTTGCTAGTATATACAGCTTCAGCTTTGTATCACAACCCCCACAATATA  
>HPV22\_Beta\_1020178\_nt794\_E7\_AOS\_rc|1  
AGAGAGTTGCTAGTATATACAGCTTCAGCTTTGTATCACAACCCCCACAATATACTACAA  
>HPV23\_Beta\_1020186\_nt877\_E7\_AOS\_rc|1  
TCGACAGGCAGGACACACCAGCTTCACGTTTCTAGCAAAGATGCTTGGAACGAGCGAAT  
>HPV23\_Beta\_1020186\_nt867\_E7\_AOS\_rc|1  
GGACACACCAGCTTCACGTTTCTAGCAAAGATGCTTGGAACGAGCGAATTCCAAAATCT  
>HPV23\_Beta\_1020186\_nt857\_E7\_AOS\_rc|1  
GCTTCACGTTTCTAGCAAAGATGCTTGGAACGAGCGAATTCCAAAATCTGTGGCTAGCA  
>HPV23\_Beta\_1020186\_nt847\_E7\_AOS\_rc|1  
TTCTAGCAAAGATGCTTGGAACGAGCGAATTCCAAAATCTGTGGCTAGCACGTAAAGCTT  
>HPV23\_Beta\_1020186\_nt837\_E7\_AOS\_rc|1  
GATGCTTGGAACGAGCGAATTCCAAAATCTGTGGCTAGCACGTAAAGCTTTAACTGTGTC  
>HPV23\_Beta\_1020186\_nt827\_E7\_AOS\_rc|1  
ACGAGCGAATTCCAAAATCTGTGGCTAGCACGTAAAGCTTTAACTGTGTCTCACAGCCTC  
>HPV28\_Alpha\_1020202\_nt573\_E7\_AOS\_rc|1  
GTTCTCCACATTTGTATAATCTTCTTCATCTAATTGCACATTGCATTGCACTGGGACGT  
>HPV28\_Alpha\_1020202\_nt715\_E7\_AOS\_rc|1  
CAGCGAGGGCACACGACCGTCAGTGTGCCCAACAGGAGCTGCTCCAATGCCCTTATATCT  
>HPV36\_Beta\_1020218\_nt861\_E7\_AOS\_rc|1  
CAGGTCACCGGTCAGCAACTGTTGAAATGCTCTGATGCCAAATTCTGTAGCTTGGACAAA  
>HPV36\_Beta\_1020218\_nt853\_E7\_AOS\_rc|1  
CGGTCAGCAACTGTTGAAATGCTCTGATGCCAAATTCTGTAGCTTGGACAAAAACGCGGA  
>HPV36\_Beta\_1020218\_nt847\_E7\_AOS\_rc|1  
GCAACTGTTGAAATGCTCTGATGCCAAATTCTGTAGCTTGGACAAAAACGCGGAGCTTGA  
>HPV37\_Beta\_1020226\_nt803\_E7\_AOS\_rc|1  
GCACTTCACCAAGTAATAGCTCTTCTGTGATCTAATTCCAATAGGCGTTGCAACAACCTA  
>HPV37\_Beta\_1020226\_nt812\_E7\_AOS\_rc|1  
AAACCAGCTGCACCTTCACCAAGTAATAGCTCTTCTGTGATCTAATTCCAATAGGCGTTG  
>HPV37\_Beta\_1020226\_nt794\_E7\_AOS\_rc|1  
CAAGTAATAGCTCTTCTGTGATCTAATTCCAATAGGCGTTGCAACAACCTATCAGTCGTA  
>HPV37\_Beta\_1020226\_nt785\_E7\_AOS\_rc|1  
GCTCTTCTGTGATCTAATTCCAATAGGCGTTGCAACAACCTATCAGTCGTAGTTTAGAAC  
>HPV38\_Beta\_1020234\_nt752\_E7\_AOS\_rc|1  
GTTTTAGCCTTACTTCACAACCCCCACAAAGAACTATGATTTTGTATGGGGTGTATGCTG  
>HPV66\_Alpha\_1020290\_nt592\_E7\_AOS\_rc|1  
TCATTGCATTGTAGGTCAATTTCCGTTTGCGGTGCAAGTTCTAATATAACCTCTTGCAAC  
>HPV66\_Alpha\_1020290\_nt585\_E7\_AOS\_rc|1  
ATTGTAGGTCAATTTCCGTTTGCGGTGCAAGTTCTAATATAACCTCTTGCAACGTTGGTA  
>HPV103\_Unclassified\_109390382\_nt171\_E7\_AOS\_rc|1  
AGCTGTGTGTTCAAAGTTTCTAATGCCCTCCTCCGTGGCTACCACATACATACACAATGAC  
>HPV103\_Unclassified\_109390382\_nt165\_E7\_AOS\_rc|1  
TGTTCAAAGTTTCTAATGCCCTCCTCCGTGGCTACCACATACATACACAATGACTTCTCA  
>HPV103\_Unclassified\_109390382\_nt159\_E7\_AOS\_rc|1  
AAGTTTCTAATGCCCTCCTCCGTGGCTACCACATACATACACAATGACTTCTCACAATAC  
>HPV103\_Unclassified\_109390382\_nt153\_E7\_AOS\_rc|1  
CTAATGCCCTCCTCCGTGGCTACCACATACATACACAATGACTTCTCACAATACTTGCAA

>HPV103\_Unclassified\_109390382\_nt147\_E7\_AOS\_rc|1  
CCCTCCTCCGTGGCTACCACATACATACACAATGACTTCTCACAATACTTGCAATCTGTC  
>HPV101\_Unclassified\_109390389\_nt151\_E7\_AOS\_rc|2  
CCTTATTGCCCCGTCCGTAGCTAGTACATGTAATGCTAAGGTTTTGTGACACTGCCCACA  
>HPV101\_Unclassified\_109390389\_nt162\_E7\_AOS\_rc|1  
TGTTCCACAGACCTTATTGCCCCGTCCGTAGCTAGTACATGTAATGCTAAGGTTTTGTGA  
>HPV70\_Alpha\_1173493\_nt804\_E7\_AOS\_rc|1  
TGCAGTAGAGATCGCAGGTTCTTGTGAGGCTTCTACTACTAAGTGCAGTGTAGTATTA  
>HPV71\_Alpha\_12084981\_nt739\_E7\_AOS\_rc|1  
TGTGCCCAGTAACAGCTGTTGAAGCGCTCTTATGTCTGCTTCGTCGCTTTCCACCACAAG  
>HPV71\_Alpha\_12084981\_nt729\_E7\_AOS\_rc|1  
AACAGCTGTTGAAGCGCTCTTATGTCTGCTTCGTCGCTTTCCACCACAAGCCTAACTGCA  
>HPV84\_Alpha\_12958167\_nt437\_E7\_AOS\_rc|1  
TCACAGTATAAACTAACTACATCTGGTATATCTGTTAAAATAATATCCTTTAACGTTGGC  
>HPV84\_Alpha\_12958167\_nt427\_E7\_AOS\_rc|1  
AACTAACTACATCTGGTATATCTGTTAAAATAATATCCTTTAACGTTGGCGTCTGGCCGC  
>HPV107\_Beta\_126131393\_nt885\_E7\_AOS\_rc|1  
CTGCAATGCCCCGAATGCCAAAATGGGTTGCAAAAACGTAGAGACGAAGTTTCACTGGACA  
>HPV107\_Beta\_126131393\_nt879\_E7\_AOS\_rc|1  
TGCCCGAATGCCAAAATGGGTTGCAAAAACGTAGAGACGAAGTTTCACTGGACACCCAGA  
>HPV107\_Beta\_126131393\_nt873\_E7\_AOS\_rc|1  
AATGCCAAAATGGGTTGCAAAAACGTAGAGACGAAGTTTCACTGGACACCCAGAACAAGG  
>HPV107\_Beta\_126131393\_nt867\_E7\_AOS\_rc|1  
AAAATGGGTTGCAAAAACGTAGAGACGAAGTTTCACTGGACACCCAGAACAAGGTACTAC  
>HPV107\_Beta\_126131393\_nt861\_E7\_AOS\_rc|2  
GGTTGCAAAAACGTAGAGACGAAGTTTCACTGGACACCCAGAACAAGGTACTACAATTTT  
>HPV72\_Alpha\_1491683\_nt623\_E7\_AOS\_rc|1  
TGCTTGTTCTACAAGTTGCTCCTGCACACCAACACCGTCCCTCTCATCCTCTGACTCTGA  
>HPV72\_Alpha\_1491683\_nt617\_E7\_AOS\_rc|1  
TTCTACAAGTTGCTCCTGCACACCAACACCGTCCCTCTCATCCTCTGACTCTGACTCTGA  
>HPV72\_Alpha\_1491683\_nt607\_E7\_AOS\_rc|1  
TGCTCCTGCACACCAACACCGTCCCTCTCATCCTCTGACTCTGACTCTGAGCTGTCTAGT  
>HPV73\_Alpha\_1491692\_nt719\_E7\_AOS\_rc|1  
CTCTTAAATCAGCTTTTGCTTTCAATGGCAAGGCATACTGTGCACTGACACTTCGTGC  
>HPV73\_Alpha\_1491692\_nt736\_E7\_AOS\_rc|1  
AAGCAACTCTTCTATCACTCTTAAATCAGCTTTTGCTTTCAATGGCAAGGCATACTGT  
>HPVcand86\_Alpha\_15741127\_nt431\_E7\_AOS\_rc|1  
TGTAGGTTAACTACATCTGGTATTTTACATAACACTATATCTTTTATGGTCGGCGTCTGG  
>HPVcand86\_Alpha\_15741127\_nt441\_E7\_AOS\_rc|1  
CTCGTCACAATGTAGGTTAACTACATCTGGTATTTTACATAACACTATATCTTTTATGGT  
>HPV88\_Gamma\_167600365\_nt644\_E7\_AOS\_rc|1  
CGGCTGGTGAAGCTAGAACAAATACCCTTACACCTGCTTCACAGAAGGCGCAACTGGTAT  
>HPV110\_Beta\_186461194\_nt742\_E7\_AOS\_rc|1  
GAATTCCAAAACTGTTGCAAGCACAAAAGCCGAAGTCGCGCACCACAAAGGCCACAAG  
>HPV110\_Beta\_186461194\_nt733\_E7\_AOS\_rc|1  
AAACTGTTGCAAGCACAAAAGCCGAAGTCGCGCACCACAAAGGCCACAAGCAGCAACAA  
>HPV110\_Beta\_186461194\_nt724\_E7\_AOS\_rc|1  
CAAGCACAAAAGCCGAAGTCGCGCACCACAAAGGCCACAAGCAGCAACAATCTTGTAAG  
>HPV111\_Beta\_186461202\_nt760\_E7\_AOS\_rc|1  
ACAAGCTGTACTTCACCCAGTAATAGTTCTTGTGTTGGGCTCTTATTCCAAGTTCCGTAGCA  
>HPV111\_Beta\_186461202\_nt752\_E7\_AOS\_rc|1  
TACTTCACCCAGTAATAGTTCTTGTGTTGGGCTCTTATTCCAAGTTCCGTAGCAAAGACGTA  
>HPV111\_Beta\_186461202\_nt744\_E7\_AOS\_rc|1  
CCAGTAATAGTTCTTGTGTTGGGCTCTTATTCCAAGTTCCGTAGCAAAGACGTATAAGCGAA  
>HPV111\_Beta\_186461202\_nt736\_E7\_AOS\_rc|1

AGTTCTTGGTGGGCTCTTATTCCAAGTTCCGTAGCAAAGACGTATAAGCGAAGTCTTGTA  
>HPVFA75/KI88-03\_Unclassified\_206902429\_nt765\_E7\_AOS\_rc|2  
GAATTAAGTTCTTGTGTGTGCGGATTCCAAAGAAGGTAGCAATCACAAATAGTCGAA  
>HPVFA75/KI88-03\_Unclassified\_206902429\_nt758\_E7\_AOS\_rc|1  
AAGTTCTTGTGTGTGCGGATTCCAAAGAAGGTAGCAATCACAAATAGTCGAAGGCGAGC  
>HPVFA75/KI88-03\_Unclassified\_206902429\_nt751\_E7\_AOS\_rc|1  
TGCTGTGTGCGGATTCCAAAGAAGGTAGCAATCACAAATAGTCGAAGGCGAGCGCCACAA  
>HPVFA75/KI88-03\_Unclassified\_206902429\_nt744\_E7\_AOS\_rc|1  
TGCGGATTCCAAAGAAGGTAGCAATCACAAATAGTCGAAGGCGAGCGCCACAACCACCAC  
>HPVFA75/KI88-03\_Unclassified\_206902429\_nt737\_E7\_AOS\_rc|1  
TCCAAAGAAGGTAGCAATCACAAATAGTCGAAGGCGAGCGCCACAACCACCACAAGGAGC  
>HPVFA75/KI88-03\_Unclassified\_206902429\_nt730\_E7\_AOS\_rc|1  
AAGGTAGCAATCACAAATAGTCGAAGGCGAGCGCCACAACCACCACAAGGAGCAACTATC  
>HPV91\_Alpha\_22023568\_nt746\_E7\_AOS\_rc|1  
AGACGAATTGAACAATAACAAGAGGTGCACTCGGTTACAACCTTGTAACTTGTAGGTCC  
>HPVcand89\_Alpha\_22095322\_nt604\_E7\_AOS\_rc|1  
GATGTCTTAGATGTGCGTCGTGAGACAATACTACTAACCTAACCTGCACGATAGCACACAC  
>HPV90\_Alpha\_22138122\_nt439\_E7\_AOS\_rc|1  
TACAATGTAGGTCAACCGCATCAGGCTGATCCAGCTCTAGAAATATGTCCTTTAAGGTTG  
>HPV58\_Alpha\_222386\_nt783\_E7\_AOS\_rc|1  
ATGGTACATGTGCCATAAGCAGCTGCTGTAGGGTTCGTACGTCGGTTGTTGTACTGTTG  
>HPV58\_Alpha\_222386\_nt768\_E7\_AOS\_rc|1  
ATAAGCAGCTGCTGTAGGGTTCGTACGTCGGTTGTTGTACTGTTGATACACAAACGAACC  
>HPV58\_Alpha\_222386\_nt744\_E7\_AOS\_rc|1  
ACGTCGGTTGTTGTACTGTTGATACACAAACGAACCGTGGTGCCACAAGTGTAACAACAA  
>HPV74\_Alpha\_27462483\_nt631\_E7\_AOS\_rc|1  
ACACTAGGCTCAGTGTACCCAGTAGAAGCGTATGTAGATTGTTGATGTCTGGTCCTGTAC  
>HPV74\_Alpha\_27462483\_nt646\_E7\_AOS\_rc|1  
GCGCGCACAGAGGACACACTAGGCTCAGTGTACCCAGTAGAAGCGTATGTAGATTGTTGA  
>HPV74\_Alpha\_27462483\_nt559\_E7\_AOS\_rc|1  
GCCGAAGGCTGCGATTACACACACAACAGCAGGTTACTATTTGGTAAGGCTGTGTATGTT  
>HPV92\_Beta\_27531786\_nt662\_E7\_AOS\_rc|1  
CCAAATTGGGTACACGATGCAAAAATTCGAAGCTTAATTCCGCAGCCACCACACGAGGAA  
>HPV92\_Beta\_27531786\_nt654\_E7\_AOS\_rc|1  
GGTACACGATGCAAAAATTCGAAGCTTAATTCCGCAGCCACCACACGAGGAACTATCTT  
>HPV75\_Beta\_2911544\_nt847\_E7\_AOS\_rc|1  
ATGTGCAATTTCTTCACGACACTCAGGACACAGGAATTGCAGCTCCTCCAACAGCAAAGT  
>HPV75\_Beta\_2911544\_nt839\_E7\_AOS\_rc|1  
TTTCTTCACGACACTCAGGACACAGGAATTGCAGCTCCTCCAACAGCAAAGTTTGAAATT  
>HPV75\_Beta\_2911544\_nt830\_E7\_AOS\_rc|1  
GACACTCAGGACACAGGAATTGCAGCTCCTCCAACAGCAAAGTTTGAAATTCTCGAATAG  
>HPV75\_Beta\_2911544\_nt815\_E7\_AOS\_rc|1  
GGAATTGCAGCTCCTCCAACAGCAAAGTTTGAAATTCTCGAATAGCCCGATCAGTAGCAA  
>HPV75\_Beta\_2911544\_nt808\_E7\_AOS\_rc|1  
CAGCTCCTCCAACAGCAAAGTTTGAAATTCTCGAATAGCCCGATCAGTAGCAAGCACAAA  
>HPV76\_Beta\_2911551\_nt846\_E7\_AOS\_rc|1  
TTGCGAATCTCTTCACGACACTCCGGACACAGGAATTGCAACTCCTCTAGCAGTAAAGAT  
>HPV80\_Beta\_2911565\_nt797\_E7\_AOS\_rc|1  
CTTCTCCAAATAGTAACCTCTTGTGCGCGAATTCCAAAGAAGTTGCAACCACCTATTA  
>HPVRTRX7\_Unclassified\_30315616\_nt862\_E7\_AOS\_rc|1  
GCTGGTCAGTAGTTCCTGCAGGGTTCTAATACCAAGTTCAGTTGCGTTGACAAAAACACG  
>HPVRTRX7\_Unclassified\_30315616\_nt882\_E7\_AOS\_rc|1  
GGACACAGCAGCTGCAGATCGCTGGTCAGTAGTTCCTGCAGGGTTCTAATACCAAGTTCA  
>HPVRTRX7\_Unclassified\_30315616\_nt875\_E7\_AOS\_rc|1  
GCAGCTGCAGATCGCTGGTCAGTAGTTCCTGCAGGGTTCTAATACCAAGTTCAGTTGCGT

>HPV65\_Gamma\_312100\_nt702\_E7\_AOS\_rc|1  
CGTCCACTATGAGTTGTTCCAACGCTCGAAGTCCAAATTCCACAGCAAACAGAGTAATCC  
>HPV65\_Gamma\_312100\_nt684\_E7\_AOS\_rc|1  
CCAACGCTCGAAGTCCAAATTCCACAGCAAACAGAGTAATCCTTACATTAACTTCACATC  
>HPV67\_Alpha\_3228267\_nt720\_E7\_AOS\_rc|1  
TGTGAATGCACAAACGCAAAGTGCACCTCACAGATGTTACACACAGTAACAATATGGTAAT  
>HPV67\_Alpha\_3228267\_nt725\_E7\_AOS\_rc|1  
TGTACTGTGAATGCACAAACGCAAAGTGCACCTCACAGATGTTACACACAGTAACAATATG  
>HPV67\_Alpha\_3228267\_nt715\_E7\_AOS\_rc|1  
ATGCACAAACGCAAAGTGCACCTCACAGATGTTACACACAGTAACAATATGGTAATTGGTT  
>HPV67\_Alpha\_3228267\_nt710\_E7\_AOS\_rc|1  
CAAACGCAAAGTGCACCTCACAGATGTTACACACAGTAACAATATGGTAATTGGTTGTATC  
>HPV67\_Alpha\_3228267\_nt705\_E7\_AOS\_rc|1  
GCAAAGTGCACCTCACAGATGTTACACACAGTAACAATATGGTAATTGGTTGTATCTGGTT  
>HPV11\_Alpha\_333026\_nt739\_E7\_AOS\_rc|1  
ACAATATTTAGTGTGCCCAGCAAAGGTCTTGTAGTTGTCTGATGTCTCCGTCTGTGCAC  
>HPV11\_Alpha\_333026\_nt728\_E7\_AOS\_rc|1  
TGTGCCCAGCAAAGGTCTTGTAGTTGTCTGATGTCTCCGTCTGTGCACTCCACAACCAG  
>HPV31\_Alpha\_333048\_nt696\_E7\_AOS\_rc|1  
GAAGTGTAGACTTACACTGACAACAAAGGTAACGATATTGTAATTGGATGTGTCCGGTT  
>HPV31\_Alpha\_333048\_nt743\_E7\_AOS\_rc|1  
CTCTTGCAATATGCGAATATCTACTTGTGTGCTCTGTACACACAAACGAAGTGTAGACTT  
>HPV31\_Alpha\_333048\_nt733\_E7\_AOS\_rc|1  
ATGCGAATATCTACTTGTGTGCTCTGTACACACAAACGAAGTGTAGACTTACACTGACAA  
>HPV31\_Alpha\_333048\_nt720\_E7\_AOS\_rc|1  
CTTGTGTGCTCTGTACACACAAACGAAGTGTAGACTTACACTGACAACAAAAGGTAACGA  
>HPV31\_Alpha\_333048\_nt709\_E7\_AOS\_rc|1  
TGTACACACAAACGAAGTGTAGACTTACACTGACAACAAAAGGTAACGATATTGTAATTG  
>HPV33\_Alpha\_333049\_nt763\_E7\_AOS\_rc|1  
TAAGTAGTTGCTGTATGGTTCGTAGGTCACCTGCTGTACTGTTGACACATAAACGAAGT  
>HPV33\_Alpha\_333049\_nt746\_E7\_AOS\_rc|1  
GTTTCGTAGGTCACCTGCTGTACTGTTGACACATAAACGAAGTGTGGTGTACAAAGTGTGA  
>HPV33\_Alpha\_333049\_nt736\_E7\_AOS\_rc|1  
CACTTGCTGTACTGTTGACACATAAACGAAGTGTGGTGTACAAAGTGTGACAACAGGTTA  
>HPV35\_Alpha\_333050\_nt757\_E7\_AOS\_rc|1  
CATTAATAAATCTTCCAATTTACGTATGTCAATGTGTGTGCTCTGTACACACAGACGTAG  
>HPV35\_Alpha\_333050\_nt752\_E7\_AOS\_rc|1  
ATAAATCTTCCAATTTACGTATGTCAATGTGTGTGCTCTGTACACACAGACGTAGTGTG  
>HPV47\_Beta\_333062\_nt874\_E7\_AOS\_rc|1  
AGCTGCAGATCACCAGTCAAAGTTCCTGAAATGTCTGATGCCACGGTTTGTTCGCTTC  
>HPV47\_Beta\_333062\_nt867\_E7\_AOS\_rc|1  
GATCACCAGTCAAAGTTCCTGAAATGTCTGATGCCACGGTTTGTTCGCTTCACAAAAA  
>HPV42\_Alpha\_333211\_nt491\_E7\_AOS\_rc|1  
TCCACGCATTGTCCTCTGCAATGCGTACACCGACCCGTCCACTGACACAATATAAATTGA  
>HPV42\_Alpha\_333211\_nt481\_E7\_AOS\_rc|1  
GTCCTCTGCAATGCGTACACCGACCCGTCCACTGACACAATATAAATTGAAATCTTGTAC  
>HPV39\_Alpha\_333245\_nt804\_E7\_AOS\_rc|1  
TGCTGTAGTTGTGCGAGAGTATCCCGTGAGGCTTCTACTACCAGCTGCAGTGTGTTGTTA  
>HPV93\_Beta\_37089393\_nt684\_E7\_AOS\_rc|1  
TGGCAGCAACAAATATTGCAAGTCGGGATCCACAGCCTCCGCCGAGAACACAATAATCT  
>HPV93\_Beta\_37089393\_nt674\_E7\_AOS\_rc|1  
AAATATTGCAAGTTCGGGATCCACAGCCTCCGCCGAGAACACAATAATCTTGAAGCTGT  
>HPV12\_Beta\_396910\_nt860\_E7\_AOS\_rc|1  
TCACTGATCAGCAGGTCTGTAGGGTCTTAATGCCAGTATCAGTTGCGTTGACAAAAATA  
>HPV12\_Beta\_396910\_nt880\_E7\_AOS\_rc|1

CTGGGCACAGCAGCTGCAGGTCCTGATCAGCAGGTCCTGTAGGGTCCTAATGCCAGTAT  
>HPV12\_Beta\_396910\_nt872\_E7\_AOS\_rc|1  
AGCAGCTGCAGGTCCTGATCAGCAGGTCCTGTAGGGTCCTAATGCCAGTATCAGTTGCG  
>HPV15\_Beta\_396924\_nt798\_E7\_AOS\_rc|1  
ACTTCTTCCAATAATAAGTCTTGTGTGAGCGAATTCCAAATGGAGTTGCAACCACTATA  
>HPV15\_Beta\_396924\_nt811\_E7\_AOS\_rc|1  
ACACACCAACTTAACTTCTTCCAATAATAAGTCTTGTGTGAGCGAATTCCAAATGGAGT  
>HPV17\_Beta\_396932\_nt810\_E7\_AOS\_rc|1  
AACTGTACTTCACCTAATAAAAGCTCCTCTTGTGAACGAATTCCAGCGTGCGTTGCAAGA  
>HPV17\_Beta\_396932\_nt801\_E7\_AOS\_rc|2  
TCACCTAATAAAAGCTCCTCTTGTGAACGAATTCCAGCGTGCGTTGCAAGAACAATAAGC  
>HPV17\_Beta\_396932\_nt792\_E7\_AOS\_rc|1  
AAAAGCTCCTCTTGTGAACGAATTCCAGCGTGCGTTGCAAGAACAATAAGCCGTAGCTTA  
>HPV19\_Beta\_396940\_nt904\_E7\_AOS\_rc|1  
CCGGGCACAACAGTTGCAATTCTTCAATCAGGATGTCCTGTAGGGTTCTAATACCAAATT  
>HPV19\_Beta\_396940\_nt898\_E7\_AOS\_rc|1  
ACAACAGTTGCAATTCTTCAATCAGGATGTCCTGTAGGGTTCTAATACCAAATTGCGTGG  
>HPV19\_Beta\_396940\_nt892\_E7\_AOS\_rc|1  
GTTGCAATTCTTCAATCAGGATGTCCTGTAGGGTTCTAATACCAAATTGCGTGGCTTTCA  
>HPV25\_Beta\_396948\_nt888\_E7\_AOS\_rc|1  
CGGACACAACAGCTGCAGTTCTTCAATTAGAAGGTTTTGTAGTGTTCTAATACCAAATC  
>HPV25\_Beta\_396948\_nt882\_E7\_AOS\_rc|1  
CAACAGCTGCAGTTCTTCAATTAGAAGGTTTTGTAGTGTTCTAATACCAAATCAGTGGC  
>HPV25\_Beta\_396948\_nt872\_E7\_AOS\_rc|1  
AGTTCTTCAATTAGAAGGTTTTGTAGTGTTCTAATACCAAATCAGTGGCTTTCACAAAG  
>HPV30\_Alpha\_396973\_nt579\_E7\_AOS\_rc|1  
AATGCAGGTCAATTTTCAGTTTGCGGTACAAGGTCCAAATATATTCTGGAATAGTTGTTA  
>HPV30\_Alpha\_396973\_nt572\_E7\_AOS\_rc|1  
GTCAATTTTCAGTTTGCGGTACAAGGTCCAAATATATTCTGGAATAGTTGTTACTTTACC  
>HPV3\_Alpha\_397005\_nt624\_E7\_AOS\_rc|1  
ACACTGTGACTACACAATACGCTTGTGCGCTGGTTCCACAGCATTTATATACTCATCTT  
>HPV40\_Alpha\_397014\_nt752\_E7\_AOS\_rc|1  
CAACTGCTGGAAGTGTGTTATATCAGTGATGGAACAATGCACTGCTAAGCGCACCAAACA  
>HPV40\_Alpha\_397014\_nt743\_E7\_AOS\_rc|1  
GAAGTGTGTTATATCAGTGATGGAACAATGCACTGCTAAGCGCACCAAACACTGACAAAA  
>HPV45\_Alpha\_397022\_nt615\_E7\_AOS\_rc|1  
CGTAACACAACAGGTCAACAGGATCTAATTCATTCTGAGGTTCCAAATGCAATACAATTT  
>HPV45\_Alpha\_397022\_nt793\_E7\_AOS\_rc|1  
TGCTGTAGTGTTCTAAGGTCCTCTGCGAGCTCTCTACTGTAAGCTCAATTCTGCCGTCA  
>HPV52\_Alpha\_397038\_nt752\_E7\_AOS\_rc|1  
CCAACAGCATTTGCTGTAGAGTACGAAGGTCCGTCGCAGTGCTATGAATGCATAGCCGTA  
>HPV52\_Alpha\_397038\_nt747\_E7\_AOS\_rc|1  
AGCATTTGCTGTAGAGTACGAAGGTCCGTCGCAGTGCTATGAATGCATAGCCGTAGTGTG  
>HPV56\_Alpha\_397053\_nt592\_E7\_AOS\_rc|1  
TCATTGCACTGTAGGTCAATTTCTGTTTGAGGTGTTAGTTCTAATACAACGTCTTGCAGC  
>HPV56\_Alpha\_397053\_nt585\_E7\_AOS\_rc|1  
ACTGTAGGTCAATTTCTGTTTGAGGTGTTAGTTCTAATACAACGTCTTGCAGCGTTGGTA  
>HPVcand62\_Alpha\_39932599\_nt645\_E7\_AOS\_rc|1  
GCCGGGACACACTATCTCCAGTGATCCGTCAGTAGTTGTTGCAGCCGTCTGAGTTCTGC  
>HPVcand62\_Alpha\_39932599\_nt602\_E7\_AOS\_rc|1  
AGCCGTCTGAGTTCTGCGTCTCCACTTAACACCACCAACCTAACTAAACAGTTGCAAATA  
>HPV43\_Alpha\_40804474\_nt736\_E7\_AOS\_rc|1  
ATTTTTTAATGTGCCAACAGCAGGTCTTCTAGCTTCTTGATGTCACTGTGAGCACTGC  
>HPV43\_Alpha\_40804474\_nt680\_E7\_AOS\_rc|1  
CTGCACAACAAGTCGAATTACACACAGACAGGATGTGCACTCTGTTACAACCTGTAAAC



>HPV43\_Alpha\_40804474\_nt671\_E7\_AOS\_rc|1  
AAGTCGAATTACACACAGACAGGATGTGCACTCTGTTACAACCTCTGTAAACTTGTAGATT  
>HPV43\_Alpha\_40804474\_nt666\_E7\_AOS\_rc|1  
GAATTACACACAGACAGGATGTGCACTCTGTTACAACCTCTGTAAACTTGTAGATTCACCT  
>HPV81\_Alpha\_40804509\_nt726\_E7\_AOS\_rc|1  
GCAGCCTCAGGCTCTGCGTCTCCACTTAACACCACCAGCCTAACTAAACACCTACAAATAC  
>HPV81\_Alpha\_40804509\_nt773\_E7\_AOS\_rc|1  
GCAGCCAGGACACACTATGGACAGTGTATCCGTCTAGTAGTTGTTGCAGCAGCCTCAGGTC  
>HPV81\_Alpha\_40804509\_nt545\_E7\_AOS\_rc|1  
GTCAATCACATCAGGATACTCATCTAGGACAATGTCCTTTATCGTTGCTGCCTGGCCATG  
>HPV95\_Gamma\_40804520\_nt756\_E7\_AOS\_rc|1  
TGCTGTGATTTCTTGCACACCCAACACAGCAAAATATCACCTTCCCTTCCAGAAGAAGTT  
>HPV95\_Gamma\_40804520\_nt762\_E7\_AOS\_rc|1  
CATTTCTGCTGTGATTTCTTGCACACCCAACACAGCAAAATATCACCTTCCCTTCCAGAA  
>HPV95\_Gamma\_40804520\_nt679\_E7\_AOS\_rc|1  
CCAAATGCAACAGCATACAAAGTGATTCTTACATTTGCTTCACAATTATAACAACAGGTA  
>HPVcand85\_Alpha\_4574720\_nt793\_E7\_AOS\_rc|1  
AGATCTCGTAGATCGGCTGCTGAACTTTCACCACCTAACTGCAGACTGGCCTCACATTTA  
>HPVcand85\_Alpha\_4574720\_nt804\_E7\_AOS\_rc|1  
ACAGCTGCTGGAGATCTCGTAGATCGGCTGCTGAACTTTCACCACCTAACTGCAGACTGG  
>HPV96\_Beta\_50253426\_nt954\_E7\_AOS\_rc|1  
AGCAAGTCTTCTAAAGAACGAATTCCAAACTGTGTAGCAGAAACGTAGATTTTCAGCCGG  
>HPV96\_Beta\_50253426\_nt961\_E7\_AOS\_rc|1  
TTCTAGCAGCAAGTCTTCTAAAGAACGAATTCCAAACTGTGTAGCAGAAACGTAGATTTT  
>HPV96\_Beta\_50253426\_nt949\_E7\_AOS\_rc|1  
GTCTTCTAAAGAACGAATTCCAAACTGTGTAGCAGAAACGTAGATTTTCAGCCGGGAATC  
>HPV96\_Beta\_50253426\_nt944\_E7\_AOS\_rc|1  
CTAAAGAACGAATTCCAAACTGTGTAGCAGAAACGTAGATTTTCAGCCGGGAATCACAGC  
>HPV96\_Beta\_50253426\_nt939\_E7\_AOS\_rc|1  
GAACGAATTCCAAACTGTGTAGCAGAAACGTAGATTTTCAGCCGGGAATCACAGCCTCCA  
>HPV96\_Beta\_50253426\_nt846\_E7\_AOS\_rc|1  
GGCTCCACCTCTGCTACTGTAGATTCTGACAGGTTTTCTGACTGCTCTTCTGTCAACTCT  
>HPV96\_Beta\_50253426\_nt839\_E7\_AOS\_rc|1  
CCTCTGCTACTGTAGATTCTGACAGGTTTTCTGACTGCTCTTCTGTCAACTCTTCGTCAC  
>HPV83\_Alpha\_5059324\_nt440\_E7\_AOS\_rc|1  
TGTTTCATTACAATATAGGTCAACTATATCTGGTATTTCTTCTAGTACAATCTCTGCTATT  
>HPV83\_Alpha\_5059324\_nt450\_E7\_AOS\_rc|1  
GTCTATACCTTGTTTCATTACAATATAGGTCAACTATATCTGGTATTTCTTCTAGTACAAT  
>HPV83\_Alpha\_5059324\_nt430\_E7\_AOS\_rc|1  
AATATAGGTCAACTATATCTGGTATTTCTTCTAGTACAATCTCTGCTATTGTTGCTGTAT  
>HPV59\_Alpha\_557236\_nt746\_E7\_AOS\_rc|1  
TAAGGCTCGCAATCCGTCTTGCGAGGTTCTACTACTAGCTGAAGTTGATTATTACACTT  
>HPV6\_Alpha\_6002612\_nt742\_E7\_AOS\_rc|1  
ACACTATGTTTAGTGTTCCCAACAGAAGCTGTTGCACTTCTCTGATGTCTGTTTCTGTAC  
>HPV57\_Alpha\_60882\_nt728\_E7\_AOS\_rc|1  
CACTATGGTCAACGTATTTCAGGAACAGCTGCTCCAGATGCCTTATGTCCGCCGCTCCGCA  
>HPV69\_Alpha\_6970418\_nt816\_E7\_AOS\_rc|1  
GTATGTAGCACACTGGTGGCACACCAAACCTCACGTCGCCCATCAGCAGCTGCTCCACCGC  
>HPV69\_Alpha\_6970418\_nt808\_E7\_AOS\_rc|1  
CACACTGGTGGCACACCAAACCTCACGTCGCCCATCAGCAGCTGCTCCACCGCTCGGACGT  
>HPV69\_Alpha\_6970418\_nt790\_E7\_AOS\_rc|1  
AACTCACGTCGCCCATCAGCAGCTGCTCCACCGCTCGGACGTTCTGTGCTGCTGCTTAGTA  
>HPV82\_Alpha\_6970427\_nt804\_E7\_AOS\_rc|1  
TTGGTTCGCACACCACGGGCACACCAGGCTTAGGTCGCCCAGTAACATTTGCTGAAATATG  
>HPV82\_Alpha\_6970427\_nt758\_E7\_AOS\_rc|1

TTTGCTGAAATATGCGAAGGCTGTCTCCACTGCTTTCCACTGCGAGCTGTACAACACTCG  
>HPV82\_Alpha\_6970427\_nt718\_E7\_AOS\_rc|1  
TGCGAGCTGTACAACACTCGAACACCTGCAACAGTGCACCTTTAATTCTGTAACACGTATC  
>HPV82\_Alpha\_6970427\_nt697\_E7\_AOS\_rc|1  
ACACCTGCAACAGTGCACCTTTAATTCTGTAACACGTATCCTGTCCAGCTTGTCTGGCTGG  
>HPV68a\_Alpha\_71726685\_nt702\_E7\_AOS\_rc|1  
AGCTGTTGTAGTGTCCGCAGGTTGTCCCGCGACGCTTCTACTACTAGTTGCAGTGCCTTG  
>HPV97\_Alpha\_71726694\_nt514\_E7\_AOS\_rc|1  
CATAACATTGAAGGTCAGCCGAATTTATTTTCATTTTGGGGTTGCAATGCAATATAATTT  
>HPV97\_Alpha\_71726694\_nt499\_E7\_AOS\_rc|1  
CAGCCGAATTTATTTTCATTTTGGGGTTGCAATGCAATATAATTTCTTGTAATGTTGGTT  
>HPV106\_Alpha\_71726710\_nt480\_E7\_AOS\_rc|1  
ATGCAGGTCAACAACATCTGGCTCATCCAATTCTAACAGGATGTCCTTTAAGGTTGGTTG  
>HPV102\_Alpha\_71726718\_nt428\_E7\_AOS\_rc|1  
TACAGGTCAATTACATCTGGTAATTCTTCTAAACTATATCTGCTATCGTTGCTGCGTGG  
>HPV102\_Alpha\_71726718\_nt440\_E7\_AOS\_rc|1  
TGCTCATTACAATACAGGTCAATTACATCTGGTAATTCTTCTAAACTATATCTGCTATC  
>HPV13\_Alpha\_85827580\_nt656\_E7\_AOS\_rc|1  
AACATTTACTACAGGACGTTAGTATTTGGTAGCATTGTAATAGTGTGCTATGTTGCGTGG  
>HPV13\_Alpha\_85827580\_nt732\_E7\_AOS\_rc|1  
AGCGTGCCCGCAGTAGGTCGTGTAGGTCGTGAATGTCAGGTCCTGTACACTCCACCACC  
>HPV13\_Alpha\_85827580\_nt673\_E7\_AOS\_rc|1  
CAGCCGGACGTTGCTACAACATTTACTACAGGACGTTAGTATTTGGTAGCATTGTAATAG  
>HPV2\_Alpha\_9626032\_nt724\_E7\_AOS\_rc|1  
AGTCAGCGTCTTCAAGAACAGCTGTTCCAGCTCTCTTAGGTCTGCTTGTCCGCACTCAAC  
>HPV2\_Alpha\_9626032\_nt736\_E7\_AOS\_rc|1  
AGGGCACACTAGAGTCAGCGTCTTCAAGAACAGCTGTTCCAGCTCTCTTAGGTCTGCTTG  
>HPV41\_Nu\_9626041\_nt865\_E7\_AOS\_rc|1  
AGGTCAAGGTGACTGTTGACCAGGAGTGCCTGTAGATTCCGTATCCCAGTGTTGCTTGCT  
>HPV41\_Nu\_9626041\_nt855\_E7\_AOS\_rc|1  
GACTGTTGACCAGGAGTGCCTGTAGATTCCGTATCCCAGTGTTGCTTGCTACGCATACAA  
>HPV41\_Nu\_9626041\_nt845\_E7\_AOS\_rc|1  
CAGGAGTGCCTGTAGATTCCGTATCCCAGTGTTGCTTGCTACGCATACAAATCGTATGAT  
>HPV41\_Nu\_9626041\_nt835\_E7\_AOS\_rc|1  
TGTAGATTCCGTATCCCAGTGTTGCTTGCTACGCATACAAATCGTATGATAGCCTGGCAA  
>HPV41\_Nu\_9626041\_nt816\_E7\_AOS\_rc|1  
TGTTGCTTGCTACGCATACAAATCGTATGATAGCCTGGCAAAATGGACACTGACTCTCTA  
>HPV41\_Nu\_9626041\_nt806\_E7\_AOS\_rc|1  
TACGCATACAAATCGTATGATAGCCTGGCAAAATGGACACTGACTCTCTACCAGGTATAA  
>HPV41\_Nu\_9626041\_nt796\_E7\_AOS\_rc|1  
AATCGTATGATAGCCTGGCAAAATGGACACTGACTCTCTACCAGGTATAATGTTCTCCTG  
>HPV41\_Nu\_9626041\_nt786\_E7\_AOS\_rc|1  
TAGCCTGGCAAAATGGACACTGACTCTCTACCAGGTATAATGTTCTCCTGGGTGTGGGGA  
>HPV41\_Nu\_9626041\_nt776\_E7\_AOS\_rc|1  
AAATGGACACTGACTCTCTACCAGGTATAATGTTCTCCTGGGTGTGGGGACTTGCTGCAC  
>HPV41\_Nu\_9626041\_nt766\_E7\_AOS\_rc|1  
TGACTCTCTACCAGGTATAATGTTCTCCTGGGTGTGGGGACTTGCTGCACCTGTTCCCGC  
>HPV1\_Mu\_9626063\_nt657\_E7\_AOS\_rc|1  
ACGGTCAATCGAACCAGTTTCTCGCAATAGGCACAGGAAGCAACGACAGCATAAGGTTGC  
>HPV1\_Mu\_9626063\_nt684\_E7\_AOS\_rc|1  
TGTCTAATGGCGCTGTGATCCGCGAGGACGGTCAATCGAACCAGTTTCTCGCAATAGGCA  
>HPV1\_Mu\_9626063\_nt675\_E7\_AOS\_rc|1  
GCGCTGTGATCCGCGAGGACGGTCAATCGAACCAGTTTCTCGCAATAGGCACAGGAAGCA  
>HPV1\_Mu\_9626063\_nt666\_E7\_AOS\_rc|1  
TCCGCGAGGACGGTCAATCGAACCAGTTTCTCGCAATAGGCACAGGAAGCAACGACAGCA

>HPV1\_Mu\_9626063\_nt648\_E7\_AOS\_rc|1  
CGAACCAGTTTCTCGCAATAGGCACAGGAAGCAACGACAGCATAAGGTTGCTGAGGCGAC  
>HPV18\_Alpha\_9626069\_nt810\_E7\_AOS\_rc|1  
GGGTGTTTCAGAAACAGCTGCTGGAATGCTCGAAGGTCGTCTGCTGAGCTTTCTACTACTA  
>HPV18\_Alpha\_9626069\_nt802\_E7\_AOS\_rc|1  
AGAAACAGCTGCTGGAATGCTCGAAGGTCGTCTGCTGAGCTTTCTACTACTAGCTCAATT  
>HPV18\_Alpha\_9626069\_nt795\_E7\_AOS\_rc|1  
GCTGCTGGAATGCTCGAAGGTCGTCTGCTGAGCTTTCTACTACTAGCTCAATTCTGGCTT  
>HPV18\_Alpha\_9626069\_nt788\_E7\_AOS\_rc|1  
GAATGCTCGAAGGTCGTCTGCTGAGCTTTCTACTACTAGCTCAATTCTGGCTTCACACTT  
>HPV4\_Gamma\_9626597\_nt720\_E7\_AOS\_rc|1  
AAAACGTCAGCTTTTCCTTCTACAAGAAGTTGTTCCAAGGTCCGTAGTCCGAGCTCAGCAG  
>HPV4\_Gamma\_9626597\_nt708\_E7\_AOS\_rc|1  
TTCCTTCTACAAGAAGTTGTTCCAAGGTCCGTAGTCCGAGCTCAGCAGCATACAATGTAA  
>HPV4\_Gamma\_9626597\_nt686\_E7\_AOS\_rc|1  
CAAGGTCCGTAGTCCGAGCTCAGCAGCATACAATGTAATTCTTACAGCAACTTCACATCT  
>HPV63\_Mu\_9626605\_nt697\_E7\_AOS\_rc|1  
TCCTCCAGACGCGTAAGAGTAGACAGGTCAGAAACGCAGGTCAGCCTTAACAGCTGATCG  
>HPV63\_Mu\_9626605\_nt690\_E7\_AOS\_rc|1  
GACGCGTAAGAGTAGACAGGTCAGAAACGCAGGTCAGCCTTAACAGCTGATCGCACAAAC  
>HPV63\_Mu\_9626605\_nt683\_E7\_AOS\_rc|1  
AAGAGTAGACAGGTCAGAAACGCAGGTCAGCCTTAACAGCTGATCGCACAAACCACAAGG  
>HPV63\_Mu\_9626605\_nt676\_E7\_AOS\_rc|1  
GACAGGTCAGAAACGCAGGTCAGCCTTAACAGCTGATCGCACAAACCACAAGGAAGCACA  
>HPV63\_Mu\_9626605\_nt669\_E7\_AOS\_rc|1  
CAGAAACGCAGGTCAGCCTTAACAGCTGATCGCACAAACCACAAGGAAGCACAATTGCAT  
>HPV63\_Mu\_9626605\_nt662\_E7\_AOS\_rc|1  
GCAGGTCAGCCTTAACAGCTGATCGCACAAACCACAAGGAAGCACAATTGCATATGGATA  
>HPV63\_Mu\_9626605\_nt655\_E7\_AOS\_rc|1  
AGCCTTAACAGCTGATCGCACAAACCACAAGGAAGCACAATTGCATATGGATATTCAGAC  
>HPV63\_Mu\_9626605\_nt648\_E7\_AOS\_rc|1  
ACAGCTGATCGCACAAACCACAAGGAAGCACAATTGCATATGGATATTCAGACTCCTCCT  
>HPV16\_Alpha\_9627100\_nt744\_E7\_AOS\_rc|1  
TCTTCCAAAGTACGAATGTCTACGTGTGTGCTTTGTACGCACAACCGAAGCGTAGAGTCA  
>HPV5\_Beta\_9627145\_nt795\_E7\_AOS\_rc|1  
CTTGACCTCACAGTTCCTGCAACCGCACGGAGCTATAACTTTGTAAGAGATCCTTTTCGTT  
>HPV5\_Beta\_9627145\_nt788\_E7\_AOS\_rc|1  
TCACAGTTCTTGCAACCGCACGGAGCTATAACTTTGTAAGAGATCCTTTTCGTTGTCAGGC  
>HPV10\_Alpha\_9627257\_nt551\_E7\_AOS\_rc|1  
TTCATCTAATTGCACATTGCATACAGGGATATCCTCTGGTGCAAGACTCAATTTCGATATC  
>HPV26\_Alpha\_9627305\_nt803\_E7\_AOS\_rc|1  
CAGCACACTGATGGCACACCAAGGACACGTCTTCCATTAACATCTGCTCCAGCACTCGAA  
>HPV26\_Alpha\_9627305\_nt782\_E7\_AOS\_rc|1  
AGGACACGTCTTCCATTAACATCTGCTCCAGCACTCGAACGTTCTGTGCGACTGCTCTGCA  
>HPV32\_Alpha\_9627327\_nt560\_E7\_AOS\_rc|1  
GTCAACCGGCGGTGTGTGTCGACGTTGTGCGGTCACACGTTGGCAGGTCATACAAAATAAT  
>HPV32\_Alpha\_9627327\_nt641\_E7\_AOS\_rc|2  
ACGTTGTATGTCTTGTATAGGTTGGTCATCGTCTTCATCATCTTCATCTGAGGTGTC  
>HPV34\_Alpha\_9627334\_nt741\_E7\_AOS\_rc|2  
CCATAAGCAGGTCTTCTAACACTAATAGGTCAGCGTGTGTGCTCTCAATGGTAAGACACA  
>HPV34\_Alpha\_9627334\_nt731\_E7\_AOS\_rc|1  
GTCTTCTAACACTAATAGGTCAGCGTGTGTGCTCTCAATGGTAAGACACACTGTGGACTG  
>HPV34\_Alpha\_9627334\_nt721\_E7\_AOS\_rc|2  
ACTAATAGGTCAGCGTGTGTGCTCTCAATGGTAAGACACACTGTGGACTGACATCTGCTG  
>HPV34\_Alpha\_9627334\_nt711\_E7\_AOS\_rc|1

CAGCGTGTGTGCTCTCAATGGTAAGACACACTGTGGACTGACATCTGCTGCAATCAGTAA  
>HPV34\_Alpha\_9627334\_nt695\_E7\_AOS\_rc|1  
AATGGTAAGACACACTGTGGACTGACATCTGCTGCAATCAGTAACTATTCTGTACCAGGC  
>HPV49\_Beta\_9627363\_nt805\_E7\_AOS\_rc|1  
CAGAAGCAGTTCTTGAAACTTCTAATAGCAGCGTCAGTGGCTAACACGAAGACTCGCAG  
>HPV49\_Beta\_9627363\_nt798\_E7\_AOS\_rc|1  
AGTTCTTGAAACTTCTAATAGCAGCGTCAGTGGCTAACACGAAGACTCGCAGTCTGGCA  
>HPV49\_Beta\_9627363\_nt791\_E7\_AOS\_rc|1  
GGAAACTTCTAATAGCAGCGTCAGTGGCTAACACGAAGACTCGCAGTCTGGCACCGCATC  
>HPV53\_Alpha\_9627377\_nt581\_E7\_AOS\_rc|2  
TTGCAGGTCAATCTCAGTTTGTGGTATAAGTTCTATAATATATTGTGGAAGTGTGGTAC  
>HPV53\_Alpha\_9627377\_nt574\_E7\_AOS\_rc|1  
TCAATCTCAGTTTGTGGTATAAGTTCTATAATATATTGTGGAAGTGTGGTACGTTACCG  
>HPV7\_Alpha\_9627389\_nt758\_E7\_AOS\_rc|1  
CATCAGCAACTGATGAACCTGCCTTATATCAGTAGCAGTACAATGGACTACTAGGCGAAC  
>HPV9\_Beta\_9627396\_nt833\_E7\_AOS\_rc|2  
GACACACCAGTTGTATATCACCCAGCAAAAGTTCCTGTTGCGCTCGAATTCCTAAATTTG  
>HPV9\_Beta\_9627396\_nt824\_E7\_AOS\_rc|1  
GTTGTATATCACCCAGCAAAAGTTCCTGTTGCGCTCGAATTCCTAAATTTGTAGCAAGCA  
>HPV9\_Beta\_9627396\_nt815\_E7\_AOS\_rc|1  
CACCCAGCAAAAGTTCCTGTTGCGCTCGAATTCCTAAATTTGTAGCAAGCACGTATAAAC  
>HPV9\_Beta\_9627396\_nt800\_E7\_AOS\_rc|1  
CCTGTTGCGCTCGAATTCCTAAATTTGTAGCAAGCACGTATAAACGAAGTCTTGACCGC  
>HPV54\_Alpha\_9628437\_nt634\_E7\_AOS\_rc|1  
CACTGGCTTAACACCTTAAATGCTTGTGTCAGGTTGTGTTACTGCTGTCTCATCTTCT  
>HPV54\_Alpha\_9628437\_nt706\_E7\_AOS\_rc|1  
TCCTGCAGTACCCTTATGCCTGTGTGCGTGCTATACACACATAGCCGTAAGTCTTACAA  
>HPV54\_Alpha\_9628437\_nt648\_E7\_AOS\_rc|1  
AACACACACCTCCACACTGGCTTAACACCTTAAATGCTTGTGTTGTCAGGTTGTGTTACTG  
>HPV24\_Unclassified\_9628486\_nt726\_E7\_AOS\_rc|1  
GTTCCACAACCGCCGCCGCAACAAAGTATTATTTTGTAAAGCTCTTCTTTCAGGCTCCACC  
>HPV24\_Unclassified\_9628486\_nt645\_E7\_AOS\_rc|1  
TCCTCTTCACAGTGCAAATCAACAGTCTGTGGCTCAGTCAACTCTAAGACAATGTCTTGT  
>HPV24\_Unclassified\_9628486\_nt635\_E7\_AOS\_rc|1  
AGTGCAAATCAACAGTCTGTGGCTCAGTCAACTCTAAGACAATGTCTTGTAGAGTGACCT  
>HPV48\_Gamma\_9628542\_nt734\_E7\_AOS\_rc|1  
ATCTGCCATTGCGGGGAAGTTGTCTGGAGCACGCAGGACAAAATAAACAAAGCTCTTTCA  
>HPV48\_Gamma\_9628542\_nt725\_E7\_AOS\_rc|1  
TGCGGGGAAGTTGTCTGGAGCACGCAGGACAAAATAAACAAAGCTCTTTCAGTAACAGTT  
>HPV48\_Gamma\_9628542\_nt716\_E7\_AOS\_rc|1  
GTTGTCTGGAGCACGCAGGACAAAATAAACAAAGCTCTTTCAGTAACAGTTGCTCAAAAC  
>HPV48\_Gamma\_9628542\_nt707\_E7\_AOS\_rc|1  
AGCACGCAGGACAAAATAAACAAAGCTCTTTCAGTAACAGTTGCTCAAAACAACGTATTC  
>HPV48\_Gamma\_9628542\_nt652\_E7\_AOS\_rc|1  
TATTCCAAATTCAGTTGCAGCGACTGTCACCTTATGCGACAGCCACAATTGTGACACTT  
>HPV48\_Gamma\_9628542\_nt643\_E7\_AOS\_rc|1  
TTCAGTTGCAGCGACTGTCACCTTATGCGACAGCCACAATTGTGACACTTGGAGTCTAT  
>HPV48\_Gamma\_9628542\_nt634\_E7\_AOS\_rc|1  
AGCGACTGTCACCTTATGCGACAGCCACAATTGTGACACTTGGAGTCTATCCGGTACGG  
>HPV48\_Gamma\_9628542\_nt625\_E7\_AOS\_rc|1  
CACCTTATGCGACAGCCACAATTGTGACACTTGGAGTCTATCCGGTACGGACAAAACCTC  
>HPV50\_Gamma\_9628550\_nt643\_E7\_AOS\_rc|1  
GTCGGTGGCGACACAACACAGTCTAACGCGACAATGACAATGCTTACACGTAGAATCAAT  
>HPV50\_Gamma\_9628550\_nt634\_E7\_AOS\_rc|1  
GACACAACACAGTCTAACGCGACAATGACAATGCTTACACGTAGAATCAATCTTGAATGG

>HPV50\_Gamma\_9628550\_nt625\_E7\_AOS\_rc|1  
CAGTCTAACGCGACAATGACAATGCTTACACGTAGAAATCAATCTTGAATGGTGACCTTTC  
>HPV50\_Gamma\_9628550\_nt616\_E7\_AOS\_rc|1  
GCGACAATGACAATGCTTACACGTAGAAATCAATCTTGAATGGTGACCTTTCAGATTCTGC  
>HPV60\_Gamma\_9628566\_nt552\_E7\_AOS\_rc|1  
CCTCATCAGCTAAAAGACTGACAGGTAAAACCAACTCCTCCAAATTTACATCAAGGTTAT  
>HPV60\_Gamma\_9628566\_nt542\_E7\_AOS\_rc|1  
TAAAAGACTGACAGGTAAAACCAACTCCTCCAAATTTACATCAAGGTTATTAACATTAGG  
>HPV60\_Gamma\_9628566\_nt532\_E7\_AOS\_rc|1  
ACAGGTAAAACCAACTCCTCCAAATTTACATCAAGGTTATTAACATTAGGCTGATTACCA  
>HPV61\_Alpha\_9628574\_nt547\_E7\_AOS\_rc|1  
TCTAATAACTGCTCATTGCAATGTAGGTCAACCACCTCAGGACGCTCTTCAAGGACTATG  
>HPV61\_Alpha\_9628574\_nt601\_E7\_AOS\_rc|1  
GCTTGTTCAACAAGTTGCTCACGCACACTATCCTCCTCCTCTGACTCTGAGCTGTCTAAT  
>HPVcand87\_Alpha\_14475578\_nt588\_E7\_VE|1  
AACCTACATTGTGACGAGCAATTGTTAGACAGCTCAGAGGAGGAGGACAATAGGGATTGT  
>HPV88\_Gamma\_167600365\_nt683\_E7\_VE|1  
TTTGTCTAGCTTCACCAGCCGGAATTCGCACGCTTCAGCAGCTTTTACTTGCAGAGATT  
>HPV36\_Beta\_1020218\_nt664\_E7\_VE|1  
ATGATTGGTAAAGAGGTACCGTGCAAGATATTGTTCTGGAGCTCAGTGAGGTGCAGCCT  
>HPV92\_Beta\_27531786\_nt550\_E7\_VE|1  
ATTGTGCTGGATCTGCAAGACCTTGTCCAGCCATTGACCTGCATTGTGACGAAGACTTG  
>HPV59\_Alpha\_557236\_nt663\_E7\_VE|1  
GATGAACCAGATGGAGTTAATCATCCTTTGCTACTAGCTAGACGAGCTGAACCACAGCGT  
>HPV82\_Alpha\_6970427\_nt596\_E7\_VE|1  
ATAGTGTTGGAGTTAACACCACAACCTGAAATTGACTTGCAATGCTACGAGCAATTTGAC  
>HPV52\_Alpha\_397038\_nt704\_E7\_VE|1  
ACAAGCAATTACTACATTGTGACATATTGTCACAGTTGTGATAGCACACTACGGCTATGC  
>HPV17\_Beta\_396932\_nt653\_E7\_VE|1  
ATAGTGCTTGAGCTGCAACAGCTTGTCCAGCCCACTGACCTGCATTGCTACGAAGAGTTA  
>HPV88\_Gamma\_167600365\_nt653\_E7\_VE|1  
TGCGCCTTCTGTGAAGCAGGTGTAAGGGTATTTGTTCTAGCTTCACCAGCCGGAATTCGC  
>HPV4\_Gamma\_9626597\_nt732\_E7\_VE|1  
GGACTACGGACCTTGAACAACCTTCTTGTAAGAAGGAAAGCTGACGTTTTGCTGCACCGCT  
>HPV93\_Beta\_37089393\_nt732\_E7\_VE|1  
TTTGTGCTGCCACAGAATTTGGAGTTTCGTTGCTTTTCAGCAATTGCTAGTTAAGGAGTTG  
>HPV41\_Nu\_9626041\_nt825\_E7\_VE|1  
CAGTGTCATTTTGCCAGGCTATCATACGATTTGTATGCGTAGCAAGCAACACTGGGATA  
>HPV34\_Alpha\_9627334\_nt582\_E7\_VE|1  
ATTGTGTTAGATCTGAAACCAACGACCGAGACTGACCTTACATGTTACGAGTCATTAGAC  
>HPV58\_Alpha\_222386\_nt725\_E7\_VE|1  
GCTAATTACTACATTGTAACCTTGTGTTACACTTGTGGCACCACGGTTCGTTTGTGTATC  
>HPV16\_Alpha\_9627100\_nt623\_E7\_VE|1  
GATCTCTACTGTTATGAGCAATTAAATGACAGCTCAGAGGAGGAGGATGAAATAGATGGT  
>HPV47\_Beta\_333062\_nt819\_E7\_VE|1  
AAAGTGATTGCACCGTGCGGTTGCAGCTGCTGCCAGGTCAAGCTTCGCATTTTTGTGAAC  
>HPV95\_Gamma\_40804520\_nt591\_E7\_VE|1  
CCTGCAAATTTGCTGAGCGATGAGGTCTTGCAACTCTCTGAGGAGGAGGATGAAGAAAGA  
>HPV83\_Alpha\_5059324\_nt541\_E7\_VE|1  
GGCGTGCGTGACCAACTGGCAGAACAAGCAAAGCAGGCCTATAGGGTGTTAACAGTGTGT  
>HPV7\_Alpha\_9627389\_nt588\_E7\_VE|1  
AGTTTAAAGTTGCAACGAGCAATTAGACAGCTCAGACTCAGAAGATGACCATGAACAAGAC  
>HPV59\_Alpha\_557236\_nt753\_E7\_VE|1  
AATAATCAACTTCAGCTAGTAGTAGAAACCTCGCAAGACGGATTGCGAGCCTTACAGCAG  
>HPV82\_Alpha\_6970427\_nt656\_E7\_VE|1

AGCTCAGACGAGGAGGATGAAGTAGATAATATGCGTGACCAGCCAGCCAGACAAGCTGGA  
>HPV103\_Unclassified\_109390382\_nt182\_E7\_VE|1  
ATGTATGTGGTAGCCACGGAGGAGGGCATTAGAACTTTGAACAACAGCTGTGTGGAAAC  
>HPV63\_Mu\_9626605\_nt675\_E7\_VE|1  
ATTGTGCTTCCTTGTGGTTTGTGCGATCAGCTGTTAAGGCTGACCTGCGTTTCTGACCTG  
>HPV102\_Alpha\_71726718\_nt481\_E7\_VE|1  
GACCTGTATTGTAATGAGCAAGCAATAGACAGCTCAGAGGAGGAGGACGAGAGGGATTGT  
>HPV41\_Nu\_9626041\_nt915\_E7\_VE|1  
CACCTTGACCTCGCTTGTACGCCTGTGTCGAGCAGAATGGCGTCCAGGGTCTCAGACAC  
>HPV2\_Alpha\_9626032\_nt590\_E7\_VE|1  
ATTGTTGACCTACATTGCGACGAGCAATTTGACAGCTCAGAAGAAGAGAATAACCATCAA  
>HPV70\_Alpha\_1173493\_nt743\_E7\_VE|1  
CAACTACTAGCCAGACGGGAAGAACCACAGCGTCACAAAATACAGTGTATGTGTTGTAAG  
>HPV48\_Gamma\_9628542\_nt728\_E7\_VE|1  
CTGTACTGAAAGAGCTTTGTTTATTTTGTCTGCGTGCTCCAGACAACTTCCCCGCAAT  
>HPV42\_Alpha\_333211\_nt567\_E7\_VE|1  
AAGGACATTGTTTTGTTTGACATACCAACGTGTGAGACACCCATTGACCTGTATTGCTAT  
>HPV106\_Alpha\_71726710\_nt559\_E7\_VE|1  
AGCTCAGAAGAGGAGGATAATAGGGAGGACGGTGAGCAACCTACAGAACCAGCACAGCAG  
>HPV42\_Alpha\_333211\_nt657\_E7\_VE|1  
CAAGCCAAACAGGACATACAGCGTTACAGAATACTGTGTGTGTGTACACAGTGTACAAG  
>HPV23\_Beta\_1020186\_nt701\_E7\_VE|1  
ATAGTTCTTGAAGAGCTTGTCCAGCCATTGACCTGCATTGCCACGAGGAGCTCACTGAA  
>HPV13\_Alpha\_85827580\_nt593\_E7\_VE|1  
GGTCTACATTGCAATGAGCAATTAGACAGCTCAGAAGACGAGGTGGACGAACAAGCCACG  
>HPV32\_Alpha\_9627327\_nt681\_E7\_VE|1  
ATAAAACAGGACATACAACGTTACAGAATAGTGTGTGGTTGTACACAGTGTGGACGGTCA  
>HPV71\_Alpha\_12084981\_nt590\_E7\_VE|1  
CAGCCAGAGGTTGTTGACCTGTATTGTCACGAGCAATTTGCCAGCTCAGACGAGGAAGAT  
>HPV106\_Alpha\_71726710\_nt529\_E7\_VE|1  
GTTGACCTGCATTGTAACGAGCAATTTGCCAGCTCAGAAGAGGAGGATAATAGGGAGGAC  
>HPVcand89\_Alpha\_22095322\_nt541\_E7\_VE|1  
ATGCATGAGCAACAGCAACTGGCAGAACGAGCACAGCAGGCCTTTAGGGTGGTAACTACG  
>HPV74\_Alpha\_27462483\_nt460\_E7\_VE|1  
ATTGTGTTACAGCTACAACCTGACCCTGTAGGCCTACTTTGCAATGAGCAATTAGACAGC  
>HPV80\_Beta\_2911565\_nt623\_E7\_VE|1  
ATGATTGGGAAAGAAGCTACTATACCAGATATAGAGCTTGAGCTGCAAGAGCTTGTCCAG  
>HPV84\_Alpha\_12958167\_nt484\_E7\_VE|1  
AGTTTATACTGTGACGAGCAATTGTTAGACAGCTCAGAGGAGGAGGATAATGGGGATTGC  
>HPV23\_Beta\_1020186\_nt671\_E7\_VE|1  
ATGATTGGGAAACAAGCTACTCTTCGTGATATAGTTCTTGAAGAGCTTGTCCAGCCCATT  
>HPV70\_Alpha\_1173493\_nt713\_E7\_VE|1  
GAACCCGACCATGTAGTTAATCACCAACAACAACCTACTAGCCAGACGGGAAGAACCACAG  
>HPV60\_Gamma\_9628566\_nt738\_E7\_VE|1  
CTTCGTCAACTATTGCTTCAAGAAGTGTTCTTGACCTGTTTGAGGTGCTCCAGATCCCTT  
>HPV73\_Alpha\_1491692\_nt611\_E7\_VE|1  
ATTGACCTTACATGTTACGAGTCATTGGACAACCTCAGAGGATGAGGATGAAACAGACAGC  
>HPV69\_Alpha\_6970418\_nt685\_E7\_VE|1  
GAAACAGATAATGTGCGTAACCAGCAAGCCAGACAAGCTGAACAAGAAGCGTGTTATAGA  
>HPV68a\_Alpha\_71726685\_nt635\_E7\_VE|1  
CATCTACTACTAGCCAGACGGGACGAACAACAGCGTCACAGAATTCAGTGTCTGTGTTGT  
>HPV34\_Alpha\_9627334\_nt612\_E7\_VE|1  
ACTGACCTTACATGTTACGAGTCATTAGACAACCTCAGAGGATGAGGATGAAACAGACAGC  
>HPV96\_Beta\_50253426\_nt764\_E7\_VE|1  
ATGATTGGGAAAGAAGCAACTATACCAGACATAAAGCTGGAGCTGCAAGACCTTGTCTCTG

>HPV50\_Gamma\_9628550\_nt638\_E7\_VE|1  
TTCAAGATTGATTCTACGTGTAAGCATTGTCATTGTGTCGCTTAGACTGTGTTGTGTCGCC  
>HPV65\_Gamma\_312100\_nt582\_E7\_VE|1  
CCTATAAACCTGCTGAGTGAGGAGGTCTTGCAACCTTCAGATGATGAGTCTGAGGCTCCA  
>HPV21\_Beta\_1020170\_nt947\_E7\_VE|1  
CTGTTTGAAGAATTGCAGCTGTTGTGTCTTGAGTGCCGCGGAAACTGCAAACATGGCGGA  
>HPV31\_Alpha\_333048\_nt651\_E7\_VE|1  
AGCTCAGATGAGGAGGATGTCATAGACAGTCCAGCTGGACAAGCAGAACCGGACACATCC  
>HPV103\_Unclassified\_109390382\_nt212\_E7\_VE|1  
AGAAACTTTGAACAACAGCTGTGTGGAAACCTGGATATTGTGTGTCCAGCCTGTGCAAAG  
>HPV31\_Alpha\_333048\_nt591\_E7\_VE|1  
TATGTGTTAGATTTGCAACCTGAGGCAACTGACCTCCACTGTTATGAGCAATTACCCGAC  
>HPV65\_Gamma\_312100\_nt612\_E7\_VE|1  
CAACCTTCAGATGATGAGTCTGAGGCTCCAGAGGAGGAGCTTTTTCTTTTAGAATAGAC  
>HPV107\_Beta\_126131393\_nt799\_E7\_VE|1  
TTACCAGAGCTTCAGATGCTACTAGTGAAGAATCAGAGGAGGAGCCTGAACGCATCCCT  
>HPV88\_Gamma\_167600365\_nt623\_E7\_VE|1  
GAGCGAGAACCTTTCCAAATAGATACCAGTTGCGCCTTCTGTGAAGCAGGTGTAAGGGTA  
>HPV107\_Beta\_126131393\_nt709\_E7\_VE|1  
ATGATTGGGAAAGAAGTAACATATCCAGATAGTTCTGGAAGAGCTGCAAGAGCTTGCT  
>HPV50\_Gamma\_9628550\_nt668\_E7\_VE|1  
CATTGTGCGCTTAGACTGTGTTGTGTGCGCCACCGACGCAGCTATCCGTGTGTTTGAGTGC  
>HPV36\_Beta\_1020218\_nt694\_E7\_VE|1  
ATTGTTCTGGAGCTCAGTGAGGTGCAGCCTGAAGTACTACCAGTTGACCTGTTTTGTGAA  
>HPV32\_Alpha\_9627327\_nt591\_E7\_VE|1  
CCGACAACGTGCGACACACCGCGGTTGACCTGTATTGTTATGAACAATTTGACACCTCA  
>HPV6\_Alpha\_6002612\_nt562\_E7\_VE|1  
ATTGTATTAGACCTGCAACCTCCAGACCCTGTAGGGTTACATTGCTATGAGCAATTAGTA  
>HPV18\_Alpha\_9626069\_nt651\_E7\_VE|1  
ATTCCGGTTGACCTTCTATGTACAGCAATTAAGCGACTCAGAGGAAGAAAACGATGAA  
>HPV49\_Beta\_9627363\_nt644\_E7\_VE|1  
ATAATACTACAAGAAGAGTTTGGCCAGCCCATTGACCTGCAATGCTACGAGAATCTAACA  
>HPV60\_Gamma\_9628566\_nt618\_E7\_VE|1  
TCACCCGATGGTGATCCTGAGGAGGAGGAGCACTATCCCTATACAATAGACACCTGTTGC  
>HPV60\_Gamma\_9628566\_nt588\_E7\_VE|1  
CCTGTGAGTCTTTTAGCTGATGAGGAGTTGTCACCCGATGGTGATCCTGAGGAGGAGGAG  
>HPV61\_Alpha\_9628574\_nt639\_E7\_VE|1  
CGTGAGCAACTTGTTGAACAAGCACAGCAGGCCTACAGGGTGGTTACTACCTGTGGCATT  
>HPV93\_Beta\_37089393\_nt762\_E7\_VE|1  
TGCTTTCAGCAATTGCTAGTTAAGGAGTTGGATCTTCTGTGTCCTAACTGCCGAAACAGC  
>HPV58\_Alpha\_222386\_nt635\_E7\_VE|1  
GACCTATTCTGCTATGAGCAATTATGTGACAGCTCAGACGAGGATGAAATAGGCTTGGAC  
>HPV101\_Unclassified\_109390389\_nt212\_E7\_VE|1  
TCTGTGGAACAACCTGCTGTGTGGAGACCTGGAATTGGTGTGTGCAAGCTGCATAAGAGCC  
>HPV29\_Alpha\_1020210\_nt645\_E7\_VE|1  
GAACCAGCACAAACAGGCGTATAGGGTGGTAACTTTGTGTACAAAGTGTAGTACAACACTG  
>HPV9\_Beta\_9627396\_nt644\_E7\_VE|1  
ATGATTGGGAAAGAAGCTACTATACCAGAGGTGGTTCTAGAACTGCAAGAGCTTGTCCAA  
>HPV6\_Alpha\_6002612\_nt592\_E7\_VE|1  
GTAGGGTTACATTGCTATGAGCAATTAGTAGACAGCTCAGAAGATGAGGTGGACGAAGTG  
>HPV17\_Beta\_396932\_nt623\_E7\_VE|1  
ATGATTGGGAAAGAAGCTACAATACCAGATATAGTGCTTGAGCTGCAACAGCTTGTCCAG  
>HPV94\_Alpha\_40804528\_nt666\_E7\_VE|1  
CCAAAGTGTTAGTTTACCAGTGCAGCTGGTGGTAGAGTGCAGCCACGCAGATATAAGGGCA  
>HPV88\_Gamma\_167600365\_nt713\_E7\_VE|1

ACGCTTCAGCAGCTTTTACTTGCAGAGATTTCATAAGTTGCCCTGGGTGTTCCAGGAAC  
>HPV21\_Beta\_1020170\_nt767\_E7\_VE|1  
GAGGTACAACCAGTTGACCTGTTTTGTGAAGAGGAGTTACCGAGCGAGCAGCAGGAAACA  
>HPV21\_Beta\_1020170\_nt737\_E7\_VE|1  
ATTGTTCTGGAGTTAAATGAATTGCAGCCTGAGGTACAACCAGTTGACCTGTTTTGTGAA  
>HPV58\_Alpha\_222386\_nt695\_E7\_VE|1  
GGGCCAGATGGACAAGCACAACCGGCCACAGCTAATTACTACATTGTAACCTGTTGTTAC  
>HPV95\_Gamma\_40804520\_nt741\_E7\_VE|1  
CTACGAGTCGTGGAACAACCTTCTTCTGGAAGGGAAGGTGATATTTTGCTGTGTTGGGTGT  
>HPV43\_Alpha\_40804474\_nt591\_E7\_VE|1  
AGCTTAACCTGTAACGAGCAATTAGACAGCTCAGACTCAGAGGATGAGCGTGAGCAACCC  
>HPV92\_Beta\_27531786\_nt520\_E7\_VE|1  
ATGATTGGGAAACAGGCTACTATACCAGATATTGTGCTGGATCTGCAAGACCTTGTCCAG  
>HPV71\_Alpha\_12084981\_nt650\_E7\_VE|1  
AATAGGGTGGACGGTGAGCAACCCACAGAACCAGCACAGCAGGCATATAGGGTGGTTTCA  
>HPV1\_Mu\_9626063\_nt620\_E7\_VE|1  
CCTCCTGATGACATAGAGGAGGAGTTAGTGTGCGCTCAGCAACCTTATGCTGTCGTTGCT  
>HPV73\_Alpha\_1491692\_nt641\_E7\_VE|1  
AACTCAGAGGATGAGGATGAAACAGACGCCATCTAGACAGACAAGCTGAACGAGAGTGT  
>HPV67\_Alpha\_3228267\_nt654\_E7\_VE|1  
AGCTCAGATGAGGAGGATGAAGTAGGCATGGACCGCCAGATGGACAAGCAAAACCAGAT  
>HPV28\_Alpha\_1020202\_nt519\_E7\_VE|1  
ATGCACGGTCCGCATCCACAGTAAAAGATATAGAATTGAGTCTTGCACCAGAGGACGTC  
>HPV2\_Alpha\_9626032\_nt620\_E7\_VE|1  
GACAGCTCAGAAGAAGAGAATAACCATCAACTGACAGAACCAGATGTGCAGGCCTACGGG  
>HPV110\_Beta\_186461194\_nt595\_E7\_VE|1  
ATGATTGGGAAACAAGCTACTATACCAGACATTGTTCTGGAATTGCAAGAGCTTGTTCAG  
>HPV15\_Beta\_396924\_nt623\_E7\_VE|1  
ATGATTGGGAAAGAAGCTACTATACCAGATATAGTGCTTGAGCTGCAAGAGCTTGTCCAG  
>HPV81\_Alpha\_40804509\_nt603\_E7\_VE|1  
GACCTACATTGCCACGAGCAATTGCTAGACAGCTCAGAGGAAGAGGTGGATGTGGATGAT  
>HPV11\_Alpha\_333026\_nt561\_E7\_VE|1  
ATAGTACTAGACCTGCAGCCTCCTGACCCTGTAGGGTTACATTGCTATGAGCAATTAGAA  
>HPV67\_Alpha\_3228267\_nt744\_E7\_VE|1  
AACATCTGTGAGTGCACCTTTGCGTTTGTGCATTTCACAGTACAGCAGCAGACGTCCGAACA  
>HPV103\_Unclassified\_109390382\_nt122\_E7\_VE|2  
CAGGATAAGTGTCCTTACCGGGTGGTGACAGATTGCAAGTATTGTGAGAAGTCATTGTGT  
>HPV48\_Gamma\_9628542\_nt608\_E7\_VE|1  
GATGCTACTGCAGAGGAGGAGTTTTGTCCGTACCGGATAGACTCCAAGTGTCACAATTGT  
>HPV20\_Beta\_1020162\_nt758\_E7\_VE|1  
GAGGTTCAACCAGTTGACCTGTTTTGTGAAGAGGAGTTACCGAACGAGCAGCAGGAGAGA  
>HPV54\_Alpha\_9628437\_nt627\_E7\_VE|1  
TCTGATGCAGAAGATGAGACAGCAGTAACACAACCTGACAAACAAGCATTTAAGGTGTTA  
>HPV71\_Alpha\_12084981\_nt680\_E7\_VE|1  
CCAGCACAGCAGGCATATAGGGTGGTTTCATACTGTGGTAGGTGCTGTCGTGCAGTTAGG  
>HPV51\_Alpha\_333087\_nt621\_E7\_VE|1  
ATTGACTTGCAATGCTACGAGCAATTTGACAGCTCAGAGGAGGAGGATGAAGTAGATAAT  
>HPV67\_Alpha\_3228267\_nt774\_E7\_VE|1  
ATTCACAGTACAGCAGCAGACGTCCGAACAATCCAGCAGATGCTTATGAACACACTAGGA  
>HPV88\_Gamma\_167600365\_nt593\_E7\_VE|1  
TCATCTGATGAGGAGACCCAGGAGGAGGAGGAGCGAGAACCTTTCCAAATAGATACCAGT  
>HPV1\_Mu\_9626063\_nt740\_E7\_VE|1  
AGACAGCTGGAGGAACCTCTTCTGCGATCTTTGAACATCGTGTGCCCCACTGTGCACCCTA  
>HPV48\_Gamma\_9628542\_nt668\_E7\_VE|1  
GGCTGTGTCATAAGGGTGACAGTCGCTGCAACTGAATTTGGAATACGTTGTTTTGAGCAA



>HPV83\_Alpha\_5059324\_nt481\_E7\_VE|1  
GACCTATATTGTAATGAACAAGGTATAGACAGCTCAGAGGAGGAGGATGATAGGGACTGT  
>HPVFA75/KI88-03\_Unclassified\_206902429\_nt606\_E7\_VE|1  
ATTGTTCTGGAAGTGAAGAGCTTGTCCAGCCATTGACCTGCATTGCTACGAAGAATTA  
>HPV73\_Alpha\_1491692\_nt671\_E7\_VE|1  
CATCTAGACAGACAAGCTGAACGAGAGTGTACAGAATAGTTACTGACTGCACGAAGTGT  
>HPV69\_Alpha\_6970418\_nt625\_E7\_VE|1  
ATTGACCTACAGTGTACGAACAATTGGACTATGAACAATTTGACAGCTCAGAGGAGGAT  
>HPV24\_Unclassified\_9628486\_nt683\_E7\_VE|1  
GTTGATTTGCACTGTGAAGAGGAGTTGCCAGAGCAGGATACGGAGGTGGAGCCTGAAAGA  
>HPV35\_Alpha\_333050\_nt653\_E7\_VE|1  
AGCTCAGAGGAGGAGGAAGATACTATTGACGGTCCAGCTGGACAAGCAAAACCAGACACC  
>HPV27\_Alpha\_396964\_nt660\_E7\_VE|1  
CTGACAGAACCAGCTGTGCAGGCCTACGGGGTGGTAACAACCTGCTGCAAGTGCGGCAGA  
>HPV42\_Alpha\_333211\_nt627\_E7\_VE|1  
GAACAATTGGACAGCTCAGATGAAGATGACCAAGCCAAACAGGACATACAGCGTTACAGA  
>HPV93\_Beta\_37089393\_nt552\_E7\_VE|1  
ATGATTGGAAAAGAGGTCCTCTGCAAGACATTGTGTTAGGGTTGACACCACCAGAGCCT  
>HPV67\_Alpha\_3228267\_nt624\_E7\_VE|1  
GACCTATACTGCTATGAGCAATTGCATGACAGCTCAGATGAGGAGGATGAAGTAGGCATG  
>HPV80\_Beta\_2911565\_nt653\_E7\_VE|1  
ATAGAGCTTGAGCTGCAAGAGCTTGTCCAGCCACTGACCTGCATTGCTACGAAGAGTTA  
>HPVcand89\_Alpha\_22095322\_nt631\_E7\_VE|1  
GTAGTATTGTCTGACGACGCACATCTAAGACATCTACAACAGCTGCTGCTGAATGACCTG  
>HPV93\_Beta\_37089393\_nt642\_E7\_VE|1  
ACCGAGCAGGATACGGAGGAGGAGCCTGCAAGAACAGCTTTCAAGATTATTGTGTTCTGC  
>HPVRTRX7\_Unclassified\_30315616\_nt728\_E7\_VE|1  
GAAGTGATAACAGTTGACCTGCTTTGTGAAGAGGAATTACCAAACGAACAGGAAACGGAG  
>HPV49\_Beta\_9627363\_nt674\_E7\_VE|1  
ATTGACCTGCAATGCTACGAGAATCTAACAGCTGAAGCGCCAGCTGAACAAGAGTTGGAG  
>HPVcand85\_Alpha\_4574720\_nt828\_E7\_VE|1  
AGTTCAGCAGCCGATCTACGAGATCTCCAGCAGCTGTTTTTGGGCACGCTATCATTTTTG  
>HPV35\_Alpha\_333050\_nt623\_E7\_VE|1  
GACCTATACTGTTATGAGCAATTGTGTGACAGCTCAGAGGAGGAGGAAGATACTATTGAC  
>HPV69\_Alpha\_6970418\_nt655\_E7\_VE|1  
TATGAACAATTTGACAGCTCAGAGGAGGATGAAACAGATAATGTGCGTAACCAGCAAGCC  
>HPV93\_Beta\_37089393\_nt612\_E7\_VE|1  
GTTGCATTGAATTGTGAAGAGGAGTTACCAACCGAGCAGGATACGGAGGAGGAGCCTGCA  
>HPV4\_Gamma\_9626597\_nt582\_E7\_VE|1  
CCAGCAAACCTGCTGAGTGAGGAGGTCTTGCAATCTTCAGATGATGAGTATGAGATTACA  
>HPV22\_Beta\_1020178\_nt644\_E7\_VE|1  
ATGATTGGGAAACAAGCTACTCTGTGTGATATAGTTCTTGAAGAGCTTGTCCTGCCCATT  
>HPVcand86\_Alpha\_15741127\_nt484\_E7\_VE|1  
AACCTACATTGTGACGAGCAATTGTTAGACAGCTCAGAGGAGGAGGATAATAGGGATTGT  
>HPV77\_Alpha\_2911558\_nt555\_E7\_VE|1  
ATTGAATTGGATCTTGCACCAGAGGCCGTCCCTTTACTATGCAATGAGCAATTAGACAGC  
>HPV32\_Alpha\_9627327\_nt531\_E7\_VE|1  
ATGCGTGGAACGCACCAACGCTAAAGGACATTATTTGTATGACCTGCCAACGTGTGAC  
>HPVcand89\_Alpha\_22095322\_nt601\_E7\_VE|1  
TGTGGTGTGCTATCGTGCAGTTAGGTAGTAGTATTGTCTGACGACGCACATCTAAGA  
>HPV81\_Alpha\_40804509\_nt663\_E7\_VE|1  
AGGGACAGTGGTGAGCAACTAGTAGAACAAGCACAGCAGGCCTATAGGGTGGTTACTACG  
>HPV52\_Alpha\_397038\_nt644\_E7\_VE|1  
AGCTCAGATGAGGAGGATACAGATGGTGTGGACCGCCAGATGGACAAGCAGAACAAGCC  
>HPV110\_Beta\_186461194\_nt625\_E7\_VE|1

ATTGTTCTGGAATTGCAAGAGCTTGTTCAGCCCACTGCTGACCTGCATTGCTACGAGGAG  
>HPV19\_Beta\_396940\_nt751\_E7\_VE|1  
GAGGTACAACCAGTTGACCTGTTTTGTGAAGAGGAGTTACCGACCGAACAGCAGGAAACA  
>HPV55\_Alpha\_1020266\_nt591\_E7\_VE|1  
GTAGGCCTACATTGCAATGAGCAATTAGACAGCTCAGAGGATGAGGTGGATGAACTAGCC  
>HPV59\_Alpha\_557236\_nt633\_E7\_VE|1  
TTACCTGACTCCGACTCCGAGAATGAAAAAGATGAACCAGATGGAGTTAATCATCCTTTG  
>HPV26\_Alpha\_9627305\_nt677\_E7\_VE|1  
GAAACAGATAATATGCGTGACCAGCAGGCCAGACAAGCTGGACAAGAAGTGTGTTACAGA  
>HPV43\_Alpha\_40804474\_nt561\_E7\_VE|1  
TATGTGCTAACTATGCAACCAGAACCTAGAAGCTTAACCTGTAACGAGCAATTAGACAGC  
>HPV13\_Alpha\_85827580\_nt563\_E7\_VE|1  
ATTGTTTTAGACCTGACTCCTGACCCTGTAGGTCTACATTGCAATGAGCAATTAGACAGC  
>HPV54\_Alpha\_9628437\_nt717\_E7\_VE|1  
GTACGGCTATGTGTGTATAGCACGCACACAGGCATAAGGGTACTGCAGGAAGTGCCTTCAT  
>HPV1\_Mu\_9626063\_nt710\_E7\_VE|1  
TTGACCGTCTCGCGGATCACAGCGCCATTAGACAGCTGGAGGAACTCCTTCTGCGATCT  
>HPV37\_Beta\_1020226\_nt623\_E7\_VE|1  
ATGATTGGGAAAGAAGCTACAATACCAGAAATAGTGCTTGAGCTGCAAGAGCTTGTCCAG  
>HPV92\_Beta\_27531786\_nt580\_E7\_VE|1  
CCCATTGACCTGCATTGTGACGAAGACTTGTTCAGAAAATCAGGAGGAGGAGCCTGCACCT  
>HPV107\_Beta\_126131393\_nt739\_E7\_VE|1  
ATAGTTCTGGAAGAGCTGCAAGAGCTTGCTCAGCCATTGACCTGCATTGTTACGAAGAG  
>HPV83\_Alpha\_5059324\_nt511\_E7\_VE|1  
AGCTCAGAGGAGGAGGATGATAGGGACTGTGGCGTGCGTGACCAACTGGCAGAACAAGCA  
>HPV107\_Beta\_126131393\_nt769\_E7\_VE|1  
CAGCCCATTTGACCTGCATTGTTACGAAGAGTTACCAGAGCTTCCAGATGCTACTAGTGAA  
>HPV6\_Alpha\_6002612\_nt622\_E7\_VE|1  
GACAGCTCAGAAGATGAGGTGGACGAAGTGGACGGACAAGATTCAACCTTTAAAACAA  
>HPV27\_Alpha\_396964\_nt630\_E7\_VE|1  
GACAGCTCAGAAGAAGAGAATAACCATCAACTGACAGAACCAGCTGTGCAGGCCTACGGG  
>HPV82\_Alpha\_6970427\_nt626\_E7\_VE|1  
ATTGACTTGCAATGCTACGAGCAATTTGACAGCTCAGACGAGGAGGATGAAGTAGATAAT  
>HPV90\_Alpha\_22138122\_nt454\_E7\_VE|1  
ATATTTCTAGAGCTGGATCAGCCTGATGCGGTTGACCTACATTGTAACGAGCAATTAGCC  
>HPV60\_Gamma\_9628566\_nt648\_E7\_VE|1  
CACTATCCCTATACAATAGACACCTGTTGCAAACCTTGTGGAGCAGGTGTTAGATTTACT  
>HPV76\_Beta\_2911551\_nt644\_E7\_VE|1  
ATTGTGCTACAAGAAGAGTTTGGCCAGCCCATTGACCTGCAATGCTACGAGAACTTACCA  
>HPV76\_Beta\_2911551\_nt674\_E7\_VE|1  
ATTGACCTGCAATGCTACGAGAACTTACCAGCTGAAGTGCCAGCTGAACAAGACACAGAG  
>HPV8\_Beta\_333074\_nt714\_E7\_VE|1  
GAAGTGTTACCAGTTGACCTGCTTTGTGAAGAGGAATTACCAAACGAACAGGAAACGGAG  
>HPV28\_Alpha\_1020202\_nt669\_E7\_VE|1  
CCAAAGTGTAGTTCACCACTGCGACTGGTGGTAGAGTGCAGCCACGCAGATATAAGGGCA  
>HPV63\_Mu\_9626605\_nt735\_E7\_VE|1  
TCTACTCTTACGCGTCTGGAGGAGCTGCTGTTAGGCTCACTGAGGATCGTGTGTCCCCTG  
>HPV35\_Alpha\_333050\_nt683\_E7\_VE|1  
GGTCCAGCTGGACAAGCAAACAGACACCTCCAATTATAATATTGTAACGTCCTGTTGT  
>HPV47\_Beta\_333062\_nt699\_E7\_VE|1  
ATTGTTCTGGAGTTAAGTGAGGTTCAACCTGAAGTATTACCAGTTGACCTGTTTTGCGAC  
>HPV90\_Alpha\_22138122\_nt484\_E7\_VE|1  
GTTGACCTACATTGTAACGAGCAATTAGCCAGCTCAGAAGAGGAGGATAATAGGGAGGAC  
>HPV2\_Alpha\_9626032\_nt650\_E7\_VE|1  
CTGACAGAACCAGATGTGCAGGCCTACGGGGTGGTAACTACCTGCTGTAAGTGTGGCAGA

>HPV102\_Alpha\_71726718\_nt571\_E7\_VE|1  
CAGGCCTATAGGGTGGTAACAAAGTGTGGTATGTGTGGCCAGTCACTGAGACTGGCAGTG  
>HPV51\_Alpha\_333087\_nt651\_E7\_VE|1  
AGCTCAGAGGAGGAGGATGAAGTAGATAATATGCGTGACCAGCTACCAGAAAGACGGGGCT  
>HPVcand62\_Alpha\_39932599\_nt454\_E7\_VE|1  
ATTGTCTCTACAAGAGCGTCCCGATGTGGTTGACCTACATTGCCACGAGCAATTGTTAGAC  
>HPV97\_Alpha\_71726694\_nt607\_E7\_VE|1  
GAAACAGATGATGTTAATCATCGACAACCTACCAGCCCCGACGAGCTGAACCACAGCGTCAC  
>HPV47\_Beta\_333062\_nt669\_E7\_VE|1  
ATGATTGGTAAAGAGGTCACCGTGCGAGATATTGTTCTGGAGTTAAGTGAGGTTCAACCT  
>HPV94\_Alpha\_40804528\_nt606\_E7\_VE|1  
GAAGATTATACAGATGTGGTGGAAACCAGCACAAACAAGCGTATAGGGTGGTAACAGTATGT  
>HPV16\_Alpha\_9627100\_nt773\_E7\_VE|1  
AGCACACACGTAGACATTCGTACTTTGGAAGACCTGTTAATGGGCACACTAGGAATTGTG  
>HPV58\_Alpha\_222386\_nt665\_E7\_VE|1  
AGCTCAGACGAGGATGAAATAGGCTTGGACGGGCCAGATGGACAAGCACAACCGGCCACA  
>HPV50\_Gamma\_9628550\_nt698\_E7\_VE|1  
ACCGACGCAGCTATCCGTGTGTTTGAGTGCCTTCTTCAATCAGAATTTTCTTTTCTGTGT  
>HPVcand85\_Alpha\_4574720\_nt768\_E7\_VE|1  
CGTCACACTATTTGCTGCGTGTGTTGTAAATGTGAGGCCAGTCTGCAGTTAGTGGTGGAA  
>HPV32\_Alpha\_9627327\_nt771\_E7\_VE|1  
GACATACAACAGCTGCATCAGATGCTTCTGGACACACTGGGCATTGTGTGTCCATTGTGT  
>HPV31\_Alpha\_333048\_nt621\_E7\_VE|1  
GACCTCCACTGTTATGAGCAATTACCCGACAGCTCAGATGAGGAGGATGTCATAGACAGT  
>HPV18\_Alpha\_9626069\_nt741\_E7\_VE|1  
GCCCCGACGAGCCGAACCACAACGTCACACAATGTTGTGTATGTGTTGTAAGTGTGAAGCC  
>HPV76\_Beta\_2911551\_nt614\_E7\_VE|1  
ATGATTGGGAAAGAGGCTACATTACCTGACATTGTGCTACAAGAAGAGTTTGGCCAGCCC  
>HPV74\_Alpha\_27462483\_nt490\_E7\_VE|1  
GGCCTACTTTGCAATGAGCAATTAGACAGCTCAGAAGAGGAGGTGGATGAACTAGCCACG  
>HPV26\_Alpha\_9627305\_nt647\_E7\_VE|1  
TATGAACAATTTGACAGCTCAGATGAGGATGAAACAGATAATATGCGTGACCAGCAGGCC  
>HPV59\_Alpha\_557236\_nt693\_E7\_VE|1  
CTACTAGCTAGACGAGCTGAACCACAGCGTCACAACATTGTGTGTGTGTGTTGTAAGTGT  
>HPVFA75/KI88-03\_Unclassified\_206902429\_nt636\_E7\_VE|1  
CCCATTGACCTGCATTGCTACGAAGAATTACCAGAGCTTCCAGATGTTCCCTAGTGAAGAT  
>HPV12\_Beta\_396910\_nt724\_E7\_VE|1  
GAAGTGTTACCAGTTGACCTGCTTTGTGAAGAGGAATTACCAAACGAGCAGGAAACGGAG  
>HPV110\_Beta\_186461194\_nt685\_E7\_VE|1  
TTAACTGAAGAAGAAACAGAGGAGGAGTCACGTCCATACACCTTACAAGATTGTTGCTGCT  
>HPV35\_Alpha\_333050\_nt743\_E7\_VE|1  
AAATGTGAGGCGACACTACGTCTGTGTGTACAGAGCACACACATTGACATACGTAAATTG  
>HPV16\_Alpha\_9627100\_nt683\_E7\_VE|1  
CCAGCTGGACAAGCAGAACCGGACAGAGCCATTACAATATTGTAACCTTTTGTGCAAG  
>HPV63\_Mu\_9626605\_nt645\_E7\_VE|1  
GAGGAGGAGGAGTCTGAATATCCATATGCAATTGTGCTTCCTTGTGGTTTGTGCGATCAG  
>HPV48\_Gamma\_9628542\_nt638\_E7\_VE|1  
TACCGGATAGACTCCAAGTGTCACAATTGTGGCTGTGCGATAAGGGTGACAGTCGCTGCA  
>HPV54\_Alpha\_9628437\_nt657\_E7\_VE|1  
CAACCTGACAAACAAGCATTTAAGGTGTTAAGCCAGTGTGGAGGTGTGTGTTGTAAGACA  
>HPV41\_Nu\_9626041\_nt885\_E7\_VE|1  
CGGAATCTACAGGCACTCCTGGTCAACAGTCACCTTGACCTCGCTTGTACGCCTGTGTGTC  
>HPV15\_Beta\_396924\_nt653\_E7\_VE|1  
ATAGTGCTTGAGCTGCAAGAGCTTGTCCAGCCCACTGACCTGCATTGCTACGAAGAGTTA  
>HPV45\_Alpha\_397022\_nt738\_E7\_VE|1

CCAGCCCCGACGAGCCGAACACAGCGTCACAAAATTTTGTGTGTATGTTGTAAGTGTGAC  
>HPV63\_Mu\_9626605\_nt615\_E7\_VE|1  
GATCTAAATTGTTATGAGGATATACCTGCTGAGGAGGAGGAGTCTGAATATCCATATGCA  
>HPV45\_Alpha\_397022\_nt708\_E7\_VE|1  
GAAGCAGATGGAGTTAGTCATGCACAACCTACCAGCCCCGACGAGCCGAACACAGCGTCAC  
>HPV24\_Unclassified\_9628486\_nt713\_E7\_VE|1  
GAGCAGGATACGAGGTGGAGCCTGAAAGAAGAGCTTACAAAATAATACTTTGTTGCGGC  
>HPV44\_Alpha\_1020242\_nt594\_E7\_VE|1  
GTAGGCCTACATTGCAATGAGCAATTAGACAGCTCAGAAGATGAGGTGGATGAACTAGCC  
>HPV36\_Beta\_1020218\_nt724\_E7\_VE|1  
GAAGTACTACCAGTTGACCTGTTTTGTGAAGAGGAATTACCAAACGAGGATACGGAGGAG  
>HPV43\_Alpha\_40804474\_nt621\_E7\_VE|1  
TCAGACTCAGAGGATGAGCGTGAGCAACCCACGCAACAGGACCAGCAAGTGAATCTACAA  
>HPV75\_Beta\_2911544\_nt644\_E7\_VE|1  
ATTGTGTCTACAAGAAGAGTTTGGCCAGCCCATTGACCTGCAATGCTACGAGGATTTAGCA  
>HPV54\_Alpha\_9628437\_nt747\_E7\_VE|1  
GGCATAAGGGTACTGCAGGAAGTCTTCATCAGGACGCACTGCAAATAGTGTGTCCCACC  
>HPVcand86\_Alpha\_15741127\_nt544\_E7\_VE|1  
GACCAACCTGCAGAACGACAGCTGGCCTATAGGGTGTAAACAGAATGTGGGTGTGTGT  
>HPV103\_Unclassified\_109390382\_nt152\_E7\_VE|1  
GATTGCAAGTATTGTGAGAAGTCATTGTGTATGTATGTGGTAGCCACGGAGGAGGGCATT  
>HPV4\_Gamma\_9626597\_nt522\_E7\_VE|1  
ATGAGAGGAGCAGCGCCACGGTTGCAGATCTTAATTTAGAACTAAATGACTTAGTGTTA  
>HPV39\_Alpha\_333245\_nt653\_E7\_VE|1  
ATACAGCCGGTTGACCTTGTATGTCACGAGCAATTAGGAGAGTCAGAGGATGAAATAGAT  
>HPV95\_Gamma\_40804520\_nt561\_E7\_VE|1  
GTTGATTTAAACCTCCATGAGTTAGTTGTTCTGCAAATTTGCTGAGCGATGAGGTCTTG  
>HPV91\_Alpha\_22023568\_nt667\_E7\_VE|1  
AGTTTAACTGTGACGAGCAATTAGACAGCTCAGACTCAGAGGATGAGCGTGAGCAATCC  
>HPV101\_Unclassified\_109390389\_nt62\_E7\_VE|1  
CCTGCAAACCTTATTATGTGATGAATTAGTAACCGAGGAGGAGGAGCAGCAGGACGAGCAA  
>HPV37\_Beta\_1020226\_nt683\_E7\_VE|1  
CCCCTGCTGACCTGCATTGTTACGAAGAGTTGAGTGAAGAAGAGACAGAGGAGGAGCGT  
>HPV33\_Alpha\_333049\_nt694\_E7\_VE|1  
CCAGATGGACAAGCACACCAGCCACAGCTGATTACTACATTGTAACCTGTTGTCACACT  
>HPV38\_Beta\_1020234\_nt653\_E7\_VE|1  
ATAGTTCTTGAAGAGCTTGTCCAGCCATTGACCTGCATTGCCACGAGGAGTTGCCTGAT  
>HPV32\_Alpha\_9627327\_nt741\_E7\_VE|1  
GTTAAACTTGTGTGTCAGTAGTACAGGCGCGGACATACAACAGCTGCATCAGATGCTTCTG  
>HPV26\_Alpha\_9627305\_nt617\_E7\_VE|1  
ATTGACCTACGCTGCTACGAACAATTGGACTATGAACAATTTGACAGCTCAGATGAGGAT  
>HPV95\_Gamma\_40804520\_nt711\_E7\_VE|1  
AGAATCACTTTGTATGCTGTTGCATTTGGACTACGAGTCGTGGAACAACCTTCTTCTGGAA  
>HPV39\_Alpha\_333245\_nt743\_E7\_VE|1  
CAACTACTAGCCAGACGGGATGAACCACAGCGTCACACAATACAGTGTTTCGTGTTGTAAG  
>HPV33\_Alpha\_333049\_nt664\_E7\_VE|1  
AGCTCAGATGAGGATGAAGGCTTGGACCGGCCAGATGGACAAGCACACCAGCCACAGCT  
>HPV96\_Beta\_50253426\_nt794\_E7\_VE|1  
ATAAAGCTGGAGCTGCAAGACCTTGTCCTGCCCATTTGACCTGCATTGTGACGAAGAGTTG  
>HPV96\_Beta\_50253426\_nt824\_E7\_VE|1  
CCCATTGACCTGCATTGTGACGAAGAGTTGACAGAAGAGCAGTCAGAAAACCTGTCAGAA  
>HPVcand89\_Alpha\_22095322\_nt481\_E7\_VE|1  
AGCCTACAATGTGAGGAAGAAATGCTAGACAGCTCAGATGAGGAAGATGCTAGGGATTGT  
>HPV101\_Unclassified\_109390389\_nt92\_E7\_VE|1  
ACCGAGGAGGAGGAGCAGCAGGACGAGCAAGCTTTAAGCCCTTATAGAATTGTGACAGAT

>HPV102\_Alpha\_71726718\_nt541\_E7\_VE|1  
GTGCGTGACCAACTGGCAGAACAAGCAAAGCAGGCCTATAGGGTGGTAACAAAGTGTGGT  
>HPV52\_Alpha\_397038\_nt764\_E7\_VE|1  
ATTCATAGCACTGCGACGGACCTTCGTACTCTACAGCAAATGCTGTTGGGCACATTACAA  
>HPVcand85\_Alpha\_4574720\_nt738\_E7\_VE|1  
CCACTACTAGCCAGACGAGAAGAACTACAGCGTCACACTATTTGCTGCGTGTGTTGTAAA  
>HPV10\_Alpha\_9627257\_nt675\_E7\_VE|1  
AAGTGTAGTTTACCCTGCGACTGGTGGTAGAGTGCAGCCACGCAGATATAAGGGCACTG  
>HPV94\_Alpha\_40804528\_nt516\_E7\_VE|1  
ATGCACGGTCCGCATCCACAGTAAAAGATATAGAATTGAGTCTTGCACCAGAGGACATC  
>HPV37\_Beta\_1020226\_nt653\_E7\_VE|1  
ATAGTGCTTGAGCTGCAAGAGCTTGTCAGCCCACTGCTGACCTGCATTGTTACGAAGAG  
>HPV33\_Alpha\_333049\_nt634\_E7\_VE|1  
GACCTATACTGCTATGAGCAATTAAGTGACAGCTCAGATGAGGATGAAGGCTTGGACCGG  
>HPV48\_Gamma\_9628542\_nt518\_E7\_VE|1  
ATGAGGGGAGATAAGGCTACTATTCCCTGACATAGAGTTAGAAGAGCTTGTTTTGCCTGCT  
>HPV1\_Mu\_9626063\_nt680\_E7\_VE|1  
TCCTGTGCCTATTGCGAGAACTGGTTGCGATTGACCGTCCTCGCGGATCACAGCGCCATT  
>HPV42\_Alpha\_333211\_nt597\_E7\_VE|1  
TGTGAGACACCCATTGACCTGTATTGCTATGAACAATTGGACAGCTCAGATGAAGATGAC  
>HPVcand87\_Alpha\_14475578\_nt648\_E7\_VE|1  
GTGCGTGACCAACCTGCAGAACCAGCACAGCTGGCCCATAGGGTGTAAACAGAGTGTGGG  
>HPV24\_Unclassified\_9628486\_nt743\_E7\_VE|1  
AGAGCTTACAAAATAATACTTTGTTGCGCGCGGTTGTGGAACCCGGCTTCGATTATTT  
>HPV52\_Alpha\_397038\_nt614\_E7\_VE|1  
GACCTACACTGCTATGAGCAATTAGGTGACAGCTCAGATGAGGAGGATACAGATGGTGTG  
>HPV110\_Beta\_186461194\_nt655\_E7\_VE|1  
CCCACTGCTGACCTGCATTGCTACGAGGAGTTAACTGAAGAAGAAACAGAGGAGGAGTCA  
>HPVcand85\_Alpha\_4574720\_nt798\_E7\_VE|1  
TGTGAGGCCAGTCTGCAGTTAGTGGTGGAAAGTTCAGCAGCCGATCTACGAGATCTCCAG  
>HPV101\_Unclassified\_109390389\_nt182\_E7\_VE|1  
CATGTACTAGCTACGGACGGGGCAATAAGGTCTGTGGAACAACCTGCTGTGTGGAGACCTG  
>HPV111\_Beta\_186461202\_nt609\_E7\_VE|1  
GTAGTTCTTGAGCTGCAAGAGCTTGTCACCAACCACTGACCTGCATTGCTACGAAGAATTG  
>HPV40\_Alpha\_397014\_nt558\_E7\_VE|1  
ATTGTGTTAAACCTGCACCCTGAACCTGTATGTCTAAACTGCAACGAGCAATTAGACAGC  
>HPV61\_Alpha\_9628574\_nt579\_E7\_VE|1  
GACCTACATTGCAATGAGCAGTTATTAGACAGCTCAGAGTCAGAGGAGGAGGATAGTGTG  
>HPV40\_Alpha\_397014\_nt648\_E7\_VE|1  
CAACTAGACAGCTTACACAGTAGAGAGCGTGAGCAACCCACGCAACAGGACCTGCAAGTA  
>HPV40\_Alpha\_397014\_nt588\_E7\_VE|1  
TGTCTAAACTGCAACGAGCAATTAGACAGCTCAGACTCAGAAGATGACCATGAACAGGAC  
>HPV67\_Alpha\_3228267\_nt684\_E7\_VE|1  
GACCGGCCAGATGGACAAGCAAAACCAGATACAACCAATTACCATATTGTTACTGTGTGT  
>HPV68a\_Alpha\_71726685\_nt755\_E7\_VE|1  
CAACAGCTGTTTATGGACTCACTAAATTTGTGTGTCCGTGGTGTGCAACTGAAACCCAG  
>HPV11\_Alpha\_333026\_nt591\_E7\_VE|1  
GTAGGGTTACATTGCTATGAGCAATTAGAAGACAGCTCAGAAGATGAGGTGGACAAGGTG  
>HPVcand85\_Alpha\_4574720\_nt708\_E7\_VE|1  
GAACCAGATAATGCAATTAATCACCGACAACCCTACTAGCCAGACGAGAAGAACTACAG  
>HPVcand87\_Alpha\_14475578\_nt618\_E7\_VE|1  
AGCTCAGAGGAGGAGACAATAGGGATTGTGTGCGTGACCAACCTGCAGAACCAGCACAG  
>HPV54\_Alpha\_9628437\_nt687\_E7\_VE|1  
AGCCAGTGTGGAGGTGTGTGTTGTAAGACAGTACGGCTATGTGTGTATAGCACGCACACA  
>HPV1\_Mu\_9626063\_nt650\_E7\_VE|1

TCGCCTCAGCAACCTTATGCTGTCGTTGCTTCCTGTGCCTATTGCGAGAACTGGTTCGA  
>HPVcand62\_Alpha\_39932599\_nt484\_E7\_VE|1  
GACCTACATTGCCACGAGCAATTGTTAGACAGCTCAGAGGAAGAGGTGGATGATAGGGAC  
>HPV68a\_Alpha\_71726685\_nt545\_E7\_VE|1  
ATACAGCCGGTTGACCTTGTATGTCACGAGCAATTAGGAGATTCAGACGATGAAATAGAT  
>HPVFA75/KI88-03\_Unclassified\_206902429\_nt576\_E7\_VE|1  
ATGATTGGGAAAGAAGTTACTATTCCAGATATTGTTCTGGAAGCTTGTCCAG  
>HPV16\_Alpha\_9627100\_nt653\_E7\_VE|1  
AGCTCAGAGGAGGAGGATGAAATAGATGGTCCAGCTGGACAAGCAGAACCGGACAGAGCC  
>HPVRTRX7\_Unclassified\_30315616\_nt698\_E7\_VE|1  
TTTATTTTGGAGCTTAGTGAGGTGCAGCCTGAAGTGATACCAGTTGACCTGCTTTGTGAA  
>HPV24\_Unclassified\_9628486\_nt623\_E7\_VE|1  
ATGATTGGAAAAGAGGTCACCTCTACAAGACATTGTCTTAGAGTTGACTGAGCCACAGACT  
>HPV41\_Nu\_9626041\_nt795\_E7\_VE|1  
CCCAGGAGAACATTATACCTGGTAGAGAGTCAGTGTCCATTTTGCCAGGCTATCATACGA  
>HPV47\_Beta\_333062\_nt729\_E7\_VE|1  
GAAGTATTACCACTTGACCTGTTTTGCGACGAGGAATTACCAAATGAACAACAGGCGGAG  
>HPV31\_Alpha\_333048\_nt681\_E7\_VE|1  
CCAGCTGGACAAGCAGAACCGGACACATCCAATTACAATATCGTTACCTTTTGTGTGTCAG  
>HPV41\_Nu\_9626041\_nt855\_E7\_VE|1  
TTTGTATGCGTAGCAAGCAACACTGGGATACGGAATCTACAGGCACTCCTGGTCAACAGT  
>HPV59\_Alpha\_557236\_nt783\_E7\_VE|1  
TCGCAAGACGGATTGCGAGCCTTACAGCAGCTGTTTATGGACACACTATCCTTTGTGTGT  
>HPV103\_Unclassified\_109390382\_nt242\_E7\_VE|1  
CTGGATATTGTGTGTCCAGCCTGTGCAAAGCAACGCCAGCGAAATGGAGGACAAAGACAC  
>HPV81\_Alpha\_40804509\_nt693\_E7\_VE|1  
GCACAGCAGGCCTATAGGGTGGTTACTACGTGTGGTATTTGTAGGTGTTTAGTTAGGCTG  
>HPVcand89\_Alpha\_22095322\_nt571\_E7\_VE|1  
GCACAGCAGGCCTTTAGGGTGGTAACTACGTGTGGTGTGTGCTATCGTGCAGTTAGGTTA  
>HPV7\_Alpha\_9627389\_nt558\_E7\_VE|1  
ATCGTGTTAGACTTGCAACCCGAACCAAGTAAGTTTAAGTTGCAACGAGCAATTAGACAGC  
>HPV25\_Beta\_396948\_nt736\_E7\_VE|1  
GAGGTACAACCAGTTGACCTGTTTTGTGAAGAGGAGTTGCCGGCTGAGCATCAGGAAACA  
>HPV97\_Alpha\_71726694\_nt637\_E7\_VE|1  
CCAGCCCCGACGAGCTGAACCACAGCGTCACACAATTGTGTGTATGTGTTGTAAATGTGAG  
>HPV52\_Alpha\_397038\_nt674\_E7\_VE|1  
GACCGGCCAGATGGACAAGCAGAACAAGCCACAAGCAATTACTACATTGTGACATATTGT  
>HPV42\_Alpha\_333211\_nt747\_E7\_VE|1  
GCGGACATAAGAAACCTGCAACAGATGCTTTTGGGCACACTGGATATTGTGTGTCCTTTG  
>HPV22\_Beta\_1020178\_nt674\_E7\_VE|1  
ATAGTTCTTGAAGAGCTTGTCCTGCCCATTGACCTGCATTGCCACGAGGAGCTGCCTGAA  
>HPV84\_Alpha\_12958167\_nt544\_E7\_VE|1  
TTGCGTGACCAACCTGCAAAACCAGCACAGCTGGCCTATAGGGTGGTAAACAGAGTGTGGG  
>HPV68a\_Alpha\_71726685\_nt575\_E7\_VE|1  
CAATTAGGAGATTCAGACGATGAAATAGATGAACCCGACCATGCAGTTAATCACCACCAA  
>HPV35\_Alpha\_333050\_nt593\_E7\_VE|1  
TATGTTTTAGATTTGGAACCCGAGGCAACTGACCTATACTGTTATGAGCAATTGTGTGAC  
>HPV72\_Alpha\_1491683\_nt675\_E7\_VE|1  
GAACAAGCACAGCAGGCCCTACGGGTGGTTACTACCTGTGGCAGGTGCTACCGTCCAGTT  
>HPV63\_Mu\_9626605\_nt705\_E7\_VE|1  
CTGTTAAGGCTGACCTGCGTTTTCTGACCTGTCTACTCTTACGCGTCTGGAGGAGCTGCTG  
>HPV7\_Alpha\_9627389\_nt798\_E7\_VE|1  
CAGGTTTCATCAGTTGCTGATGGGCACACTAAATATAGTGTGCCCCAACTGTGCAGCTACA  
>HPV4\_Gamma\_9626597\_nt642\_E7\_VE|1  
GAGGAGGAGTCGGTGGTTCCATTTAGAAATAGACACCTGTTGCTATAGATGTGAAGTTGCT

>HPV5\_Beta\_9627145\_nt724\_E7\_VE|1  
GAAGTGCTACCAGTTGACCTGTTTTGTGAAGAGGAATTACCAAACGAGCAGGAAACGGAG  
>HPV24\_Unclassified\_9628486\_nt833\_E7\_VE|1  
CTGCAAGACTTACTGCTAGAAGAGGTGGTCATTTTGTGTCCCGACTGCCGTAACAGCGAT  
>HPV60\_Gamma\_9628566\_nt558\_E7\_VE|1  
CTTGATGTAAATTTGGAGGAGTTGGTTTTACCTGTCTAGTCTTTTAGCTGATGAGGAGTTG  
>HPV65\_Gamma\_312100\_nt522\_E7\_VE|1  
ATGAGAGGAGCAGCACCCAGGGTTGCAGATCTTAATTTAGAATTAAATGACTTGGTGTG  
>HPVcand87\_Alpha\_14475578\_nt588\_E7\_VE\_rc|1  
ACAATCCCTATTGTCCTCCTCTCTGAGCTGTCTAACAATTGCTCGTCACAATGTAGGTT  
>HPV88\_Gamma\_167600365\_nt683\_E7\_VE\_rc|1  
AATCTCTGCAAGTAAAAGCTGCTGAAGCGTGCGAATTCGGGCTGGTGAAGCTAGAACAAA  
>HPV36\_Beta\_1020218\_nt664\_E7\_VE\_rc|1  
AGGCTGCACCTCACTGAGCTCCAGAACAAATATCTTGCACGGTGACCTCTTTACCAATCAT  
>HPV92\_Beta\_27531786\_nt550\_E7\_VE\_rc|1  
CAAGTCTTCGTCACAATGCAGGTCAATGGGCTGGACAAGGTCTTGCAGATCCAGCACAAAT  
>HPV59\_Alpha\_557236\_nt663\_E7\_VE\_rc|1  
ACGCTGTGGTTCAGCTCGTCTAGCTAGTAGCAAAGGATGATTAACCTCCATCTGGTTCATC  
>HPV82\_Alpha\_6970427\_nt596\_E7\_VE\_rc|1  
GTCAAATTGCTCGTAGCATTGCAAGTCAATTTTCAGGTTGTGGTGTAACTCCAACACTAT  
>HPV52\_Alpha\_397038\_nt704\_E7\_VE\_rc|1  
GCATAGCCGTAGTGTGCTATCACAACCTGTGACAATATGTCACAATGTAGTAATTGCTTGT  
>HPV17\_Beta\_396932\_nt653\_E7\_VE\_rc|1  
TAACTCTTCGTAGCAATGCAGGTCAAGTGGGCTGGACAAGCTGTTGCAGCTCAAGCACTAT  
>HPV88\_Gamma\_167600365\_nt653\_E7\_VE\_rc|1  
GCGAATTCCGGCTGGTGAAGCTAGAACAAATACCCTTACACCTGCTTCACAGAAGGCGCA  
>HPV4\_Gamma\_9626597\_nt732\_E7\_VE\_rc|1  
AGCGGTGCAGCAAAACGTCAGCTTTCTCTTCTACAAGAAGTTGTTCCAAGGTCCGTAGTCC  
>HPV93\_Beta\_37089393\_nt732\_E7\_VE\_rc|1  
CAACTCCTTAAGTAGCAATTGCTGAAAGCAACGAACCTCCAAATTCTGTGGCAGCAACAAA  
>HPV41\_Nu\_9626041\_nt825\_E7\_VE\_rc|1  
TATCCCAGTGTTGCTTGCTACGCATACAAATCGTATGATAGCCTGGCAAAATGGACACTG  
>HPV34\_Alpha\_9627334\_nt582\_E7\_VE\_rc|1  
GTCTAATGACTCGTAACATGTAAGGTCAGTCTCGGTCGTTGGTTTCAGATCTAACACAAT  
>HPV58\_Alpha\_222386\_nt725\_E7\_VE\_rc|1  
GATACACAAACGAACCGTGGTGCCACAAGTGTAAACAACAAGTTACAATGTAGTAATTAGC  
>HPV16\_Alpha\_9627100\_nt623\_E7\_VE\_rc|1  
ACCATCTATTTTCATCCTCCTCTCTGAGCTGTCATTTAATTGCTCATAACAGTAGAGATC  
>HPV47\_Beta\_333062\_nt819\_E7\_VE\_rc|1  
GTTTCAAAAAATGCGAAGCTTGACCTCGCAGCAGCTGCAACCGCACGGTGCAATCACTTT  
>HPV95\_Gamma\_40804520\_nt591\_E7\_VE\_rc|1  
TCTTTCTTCATCCTCCTCCTCAGAGAGTTGCAAGACCTCATCGCTCAGCAAATTTGCAGG  
>HPV83\_Alpha\_5059324\_nt541\_E7\_VE\_rc|1  
ACACACTGTTAACACCCTATAGGCCTGCTTTGCTTGTCTGCCAGTTGGTCACGCACGCC  
>HPV7\_Alpha\_9627389\_nt588\_E7\_VE\_rc|1  
GTCTTGTTTCATGGTCATCTTCTGAGTCTGAGCTGTCTAATTGCTCGTTGCAACTTAACT  
>HPV59\_Alpha\_557236\_nt753\_E7\_VE\_rc|1  
CTGCTGTAAGGCTCGCAATCCGTCTTGCGAGGTTTCTACTACTAGCTGAAGTTGATTATT  
>HPV82\_Alpha\_6970427\_nt656\_E7\_VE\_rc|1  
TCCAGCTTGTCTGGCTGGCTGGTCACGCATATTATCTACTTCATCCTCCTCGTCTGAGCT  
>HPV103\_Unclassified\_109390382\_nt182\_E7\_VE\_rc|1  
GTTTCCACACAGCTGTTGTTCAAAGTTTCTAATGCCCTCCTCCGTGGCTACCACATACAT  
>HPV63\_Mu\_9626605\_nt675\_E7\_VE\_rc|1  
CAGGTCAGAAACGCAGGTCAGCCTTAACAGCTGATCGCACAAACCACAAGGAAGCACAAAT  
>HPV102\_Alpha\_71726718\_nt481\_E7\_VE\_rc|1

ACAATCCCTCTCGTCCTCCTCTCTGAGCTGTCTATTGCTTGCTCATTACAATACAGGTC  
>HPV41\_Nu\_9626041\_nt915\_E7\_VE\_rc|1  
GTGTCTGAGACCCTGGACGCCATTCTGCTCGACACAGGCGTGACAAGCGAGGTCAAGGTG  
>HPV2\_Alpha\_9626032\_nt590\_E7\_VE\_rc|1  
TTGATGGTTATTCTCTTCTTCTGAGCTGTCAAATTGCTCGTCGCAATGTAGGTCAACAAT  
>HPV70\_Alpha\_1173493\_nt743\_E7\_VE\_rc|1  
CTTACAACACATACACTGTATTTTGTGACGCTGTGGTTCTTCCCGTCTGGCTAGTAGTTG  
>HPV48\_Gamma\_9628542\_nt728\_E7\_VE\_rc|1  
ATTGCGGGGAAGTTGTCTGGAGCACGCAGGACAAAATAAACAAAGCTCTTTCAGTAACAG  
>HPV42\_Alpha\_333211\_nt567\_E7\_VE\_rc|1  
ATAGCAATACAGGTCAATGGGTGTCTCACACGTTGGTATGTCAAACAAAACAATGTCCTT  
>HPV106\_Alpha\_71726710\_nt559\_E7\_VE\_rc|1  
CTGCTGTGCTGGTTCTGTAGGTTGCTCACCGTCTCCCTATTATCCTCCTCTTCTGAGCT  
>HPV42\_Alpha\_333211\_nt657\_E7\_VE\_rc|1  
CTTGTAACACTGTGTACACACACACAGTATTCTGTAACGCTGTATGTCCTGTTTGGCTTG  
>HPV23\_Beta\_1020186\_nt701\_E7\_VE\_rc|1  
TTCAGTGAGCTCCTCGTGGCAATGCAGGTCAATGGGCTGGACAAGCTCTTCAAGAACTAT  
>HPV13\_Alpha\_85827580\_nt593\_E7\_VE\_rc|1  
CGTGGCTGTTCGTCCACCTCGTCTTCTGAGCTGTCTAATTGCTCATTGCAATGTAGACC  
>HPV32\_Alpha\_9627327\_nt681\_E7\_VE\_rc|1  
TGACCGTCCACACTGTGTACAACCACACACTATTCTGTAACGTTGTATGTCCTGTTTTAT  
>HPV71\_Alpha\_12084981\_nt590\_E7\_VE\_rc|1  
ATCTTCCTCGTCTGAGCTGGCAAATTGCTCGTGACAATACAGGTCAACAACCTCTGGCTG  
>HPV106\_Alpha\_71726710\_nt529\_E7\_VE\_rc|1  
GTCCTCCCTATTATCCTCCTCTTCTGAGCTGGCAAATTGCTCGTTACAATGCAGGTCAAC  
>HPVcand89\_Alpha\_22095322\_nt541\_E7\_VE\_rc|1  
CGTAGTTACCACCCTAAAGGCCTGCTGTGCTCGTTCTGCCAGTTGCTGTTGCTCATGCAT  
>HPV74\_Alpha\_27462483\_nt460\_E7\_VE\_rc|1  
GCTGTCTAATTGCTCATTGCAAAGTAGGCCCTACAGGGTCAGGTTGTAGCTGTAACACAAT  
>HPV80\_Beta\_2911565\_nt623\_E7\_VE\_rc|1  
CTGGACAAGCTCTTGCAGCTCAAGCTCTATATCTGGTATAGTAGCTTCTTCCCAATCAT  
>HPV84\_Alpha\_12958167\_nt484\_E7\_VE\_rc|1  
GCAATCCCCATTATCCTCCTCCTCTGAGCTGTCTAACAATTGCTCGTCACAGTATAAACT  
>HPV23\_Beta\_1020186\_nt671\_E7\_VE\_rc|1  
AATGGGCTGGACAAGCTCTTCAAGAACTATATCACGAAGAGTAGCTTGTTTCCCAATCAT  
>HPV70\_Alpha\_1173493\_nt713\_E7\_VE\_rc|1  
CTGTGGTTCTTCCCGTCTGGCTAGTAGTTGTTGTTGGTGATTAACTACATGGTCGGGTTT  
>HPV60\_Gamma\_9628566\_nt738\_E7\_VE\_rc|1  
AAGGGATCTGGAGCACCTCAAACAGGTCAAGAACACTTCTTGAAGCAATAGTTGACGAAG  
>HPV73\_Alpha\_1491692\_nt611\_E7\_VE\_rc|1  
GCTGTCTGTTTCATCCTCATCCTCTGAGTTGTCCAATGACTCGTAACATGTAAGGTCAAT  
>HPV69\_Alpha\_6970418\_nt685\_E7\_VE\_rc|1  
TCTATAACACGCTTCTTGTTTCAGCTTGTCTGGCTTGCTGGTTACGCACATTATCTGTTTC  
>HPV68a\_Alpha\_71726685\_nt635\_E7\_VE\_rc|1  
ACAACACAGACACTGAATTCTGTGACGCTGTTGTTTCGTCCCGTCTGGCTAGTAGTAGATG  
>HPV34\_Alpha\_9627334\_nt612\_E7\_VE\_rc|1  
GCTGTCTGTTTCATCCTCATCCTCTGAGTTGTCTAATGACTCGTAACATGTAAGGTCAAGT  
>HPV96\_Beta\_50253426\_nt764\_E7\_VE\_rc|1  
CAGGACAAGGTCTTGCAGCTCCAGCTTTATGTCTGGTATAGTTGCTTCTTCCCAATCAT  
>HPV50\_Gamma\_9628550\_nt638\_E7\_VE\_rc|1  
GGCGACACAACACAGTCTAACGCGACAATGACAATGCTTACACGTAGAATCAATCTTGAA  
>HPV65\_Gamma\_312100\_nt582\_E7\_VE\_rc|1  
TGGAGCCTCAGACTCATCATCTGAAGGTTGCAAGACCTCCTCACTCAGCAGGTTTATAGG  
>HPV21\_Beta\_1020170\_nt947\_E7\_VE\_rc|1  
TCCGCCATGTTTGCAGTTTCCGCGGCACTCAGGACACAACAGCTGCAATTCTTCAAACAG



>HPV31\_Alpha\_333048\_nt651\_E7\_VE\_rc|1  
GGATGTGTCCGGTCTGCTTGTCCAGCTGGACTGTCTATGACATCCTCCTCATCTGAGCT  
>HPV103\_Unclassified\_109390382\_nt212\_E7\_VE\_rc|1  
CTTTGCACAGGCTGGACACACAATATCCAGGTTTCCACACAGCTGTTGTTCAAAGTTTCT  
>HPV31\_Alpha\_333048\_nt591\_E7\_VE\_rc|1  
GTCGGGTAATTGCTCATAACAGTGGAGGTCAGTTGCCTCAGGTTGCAAATCTAACACATA  
>HPV65\_Gamma\_312100\_nt612\_E7\_VE\_rc|1  
GTCTATTCTAAAAGGAAAAAGCTCCTCCTCTGGAGCCTCAGACTCATCATCTGAAGGTTG  
>HPV107\_Beta\_126131393\_nt799\_E7\_VE\_rc|1  
AGGGATGCGTTCAGGCTCCTCCTCTGATTCTTCACTAGTAGCATCTGGAAGCTCTGGTAA  
>HPV88\_Gamma\_167600365\_nt623\_E7\_VE\_rc|1  
TACCCTTACACCTGCTTCACAGAAGGCGCAACTGGTATCTATTTGGAAAGGTTCTCGCTC  
>HPV107\_Beta\_126131393\_nt709\_E7\_VE\_rc|1  
AGCAAGCTCTTGCAGCTCTTCCAGAACTATATCTGGAATAGTTACTTCTTTCCCAATCAT  
>HPV50\_Gamma\_9628550\_nt668\_E7\_VE\_rc|1  
GCACTCAAACACACGGATAGCTGCGTCGGTGGCGACACAACACAGTCTAACGCGACAATG  
>HPV36\_Beta\_1020218\_nt694\_E7\_VE\_rc|1  
TTCACAAAACAGGTCAACTGGTAGTACTTCAGGCTGCACCTCACTGAGCTCCAGAACAAT  
>HPV32\_Alpha\_9627327\_nt591\_E7\_VE\_rc|1  
TGAGGTGTCAAATTGTTTCATAACAATACAGGTCAACCGGCGGTGTGTGCGACGTTGTCGG  
>HPV6\_Alpha\_6002612\_nt562\_E7\_VE\_rc|1  
TACTAATTGCTCATAGCAATGTAACCCTACAGGGTCTGGAGGTTGCAGGTCTAATACAAT  
>HPV18\_Alpha\_9626069\_nt651\_E7\_VE\_rc|1  
TTCATCGTTTTCTTCTCCTCTGAGTCGCTTAATTGCTCGTGACATAGAAGGTCAACCGGAAT  
>HPV49\_Beta\_9627363\_nt644\_E7\_VE\_rc|1  
TGTTAGATTCTCGTAGCATTCGAGGTCAATGGGCTGGCCAAACTCTTCTTGTAGTATTAT  
>HPV60\_Gamma\_9628566\_nt618\_E7\_VE\_rc|1  
GCAACAGGTGTCTATTGTATAGGGATAGTGCTCCTCCTCCTCAGGATCACCATCGGGTGA  
>HPV60\_Gamma\_9628566\_nt588\_E7\_VE\_rc|1  
CTCCTCCTCCTCAGGATCACCATCGGGTGACAACCTCCTCATCAGCTAAAAGACTGACAGG  
>HPV61\_Alpha\_9628574\_nt639\_E7\_VE\_rc|1  
AATGCCACAGGTAGTAACCACCCTGTAGGCCTGCTGTGCTTGTTCACAAGTTGCTCACG  
>HPV93\_Beta\_37089393\_nt762\_E7\_VE\_rc|1  
GCTGTTTTCGGCAGTTAGGACACAGAAGATCCAACCTTAAGTCAATGCTGAAAGCA  
>HPV58\_Alpha\_222386\_nt635\_E7\_VE\_rc|1  
GTCCAAGCCTATTTTCATCCTCGTCTGAGCTGTCACATAATTGCTCATAGCAGAATAGGTC  
>HPV101\_Unclassified\_109390389\_nt212\_E7\_VE\_rc|1  
GGCTCTTATGCAGCTTGCACACACCAATTCCAGGTCTCCACACAGCAGTTGTTCCACAGA  
>HPV29\_Alpha\_1020210\_nt645\_E7\_VE\_rc|1  
CAGTGTGTACTACACTTTGTACACAAAGTTACCACCCTATACGCCTGTTGTGCTGGTTC  
>HPV9\_Beta\_9627396\_nt644\_E7\_VE\_rc|1  
TTGGACAAGCTCTTGCAGTTCTAGAACCACCTCTGGTATAGTAGCTTCTTTCCCAATCAT  
>HPV6\_Alpha\_6002612\_nt592\_E7\_VE\_rc|1  
CACTTCGTCCACCTCATCTTCTGAGCTGTCTACTAATTGCTCATAGCAATGTAACCCTAC  
>HPV17\_Beta\_396932\_nt623\_E7\_VE\_rc|1  
CTGGACAAGCTGTTGCAGCTCAAGCACTATATCTGGTATTGTAGCTTCTTTCCCAATCAT  
>HPV94\_Alpha\_40804528\_nt666\_E7\_VE\_rc|1  
TGCCCTTATATCTGCGTGGCTGCACTCTACCACAGTCGAGTGGTAAACTACACTTTGG  
>HPV88\_Gamma\_167600365\_nt713\_E7\_VE\_rc|1  
GTTCTTGGAACACCCAGGGCAACTTATGGAAATCTCTGCAAGTAAAAGCTGCTGAAGCGT  
>HPV21\_Beta\_1020170\_nt767\_E7\_VE\_rc|1  
TGTTTTCTGCTGCTCGCTCGGTAACCTCCTCTCACAAAACAGGTCAACTGGTTGTACCTC  
>HPV21\_Beta\_1020170\_nt737\_E7\_VE\_rc|1  
TTCACAAAACAGGTCAACTGGTTGTACCTCAGGCTGCAATTCATTTAACTCCAGAACAAT  
>HPV58\_Alpha\_222386\_nt695\_E7\_VE\_rc|1

GTAACAACAAGTTACAATGTAGTAATTAGCTGTGGCCGGTTGTGCTTGTCCATCTGGCCC  
>HPV95\_Gamma\_40804520\_nt741\_E7\_VE\_rc|1  
ACACCCAACACAGCAAAATATCACCTTCCCTTCCAGAAGAAGTTGTTCCACGACTCGTAG  
>HPV43\_Alpha\_40804474\_nt591\_E7\_VE\_rc|1  
GGGTTGCTCACGCTCATCCTCTGAGTCTGAGCTGTCTAATTGCTCGTTACAGGTTAAGCT  
>HPV92\_Beta\_27531786\_nt520\_E7\_VE\_rc|1  
CTGGACAAGGTCTTGCAGATCCAGCACAAATATCTGGTATAGTAGCCTGTTTCCCAATCAT  
>HPV71\_Alpha\_12084981\_nt650\_E7\_VE\_rc|1  
TGAAACCACCTTATATGCCTGCTGTGCTGGTCTGTGGGTTGCTCACCGTCCACCCTATT  
>HPV1\_Mu\_9626063\_nt620\_E7\_VE\_rc|1  
AGCAACGACAGCATAAGGTTGCTGAGGCGACACTAACTCCTCCTCTATGTCATCAGGAGG  
>HPV73\_Alpha\_1491692\_nt641\_E7\_VE\_rc|1  
ACACTCTCGTTCAGCTTGTCTGTCTAGATGGCTGTCTGTTTCATCCTCATCCTCTGAGTT  
>HPV67\_Alpha\_3228267\_nt654\_E7\_VE\_rc|1  
ATCTGGTTTTGCTTGTCCATCTGGCCGGTCCATGCCTACTTCATCCTCCTCATCTGAGCT  
>HPV28\_Alpha\_1020202\_nt519\_E7\_VE\_rc|1  
GACGTCTCTGGTGCAGACTCAATTCTATATCTTTTACTGTGGGATGCGGACCGTGCAT  
>HPV2\_Alpha\_9626032\_nt620\_E7\_VE\_rc|1  
CCCGTAGGCCTGCACATCTGGTTCGTCTGAGTTGATTATCTCTTCTTCTGAGCTGTC  
>HPV110\_Beta\_186461194\_nt595\_E7\_VE\_rc|1  
CTGAACAAGCTCTTGCAAATCCAGAACAATGTCTGGTATAGTAGCTTGTTCCTTCCCAATCAT  
>HPV15\_Beta\_396924\_nt623\_E7\_VE\_rc|1  
CTGGACAAGCTCTTGCAGCTCAAGCACTATATCTGGTATAGTAGCTTCTTTCCTTCCCAATCAT  
>HPV81\_Alpha\_40804509\_nt603\_E7\_VE\_rc|1  
ATCATCCACATCCACCTCTTCTCTGAGCTGTCTAGCAATTGCTCGTGGCAATGTAGGTC  
>HPV11\_Alpha\_333026\_nt561\_E7\_VE\_rc|1  
TTCTAATTGCTCATAGCAATGTAACCCTACAGGGTCAGGAGGCTGCAGGCTCTAGTACTAT  
>HPV67\_Alpha\_3228267\_nt744\_E7\_VE\_rc|1  
TGTTTCGGACGTCTGCTGCTGTACTGTGAATGCACAAACGCAAAGTGCCTCACAGATGTT  
>HPV103\_Unclassified\_109390382\_nt122\_E7\_VE\_rc|2  
ACACAATGACTTCTCACAATACTTGCAATCTGTCCACCACCCGGTAAGGACACTTATCCTG  
>HPV48\_Gamma\_9628542\_nt608\_E7\_VE\_rc|1  
ACAATTGTGACACTTGGAGTCTATCCGGTACGGACAAAACCTCCTCCTCTGCAGTAGCATC  
>HPV20\_Beta\_1020162\_nt758\_E7\_VE\_rc|1  
TCTCTCCTGCTGCTCGTTCGGTAACCTCCTCTTACAAAACAGGTCAACTGGTTGAACCTC  
>HPV54\_Alpha\_9628437\_nt627\_E7\_VE\_rc|1  
TAACACCTTAAATGCTTGTGTTGTCAGGTTGTGTTACTGCTGTCTCATCTTCTGCATCAGA  
>HPV71\_Alpha\_12084981\_nt680\_E7\_VE\_rc|1  
CCTAACTGCACGACAGCACCTACCACAGTATGAAACCACCTTATATGCCTGCTGTGCTGG  
>HPV51\_Alpha\_333087\_nt621\_E7\_VE\_rc|1  
ATTATCTACTTCATCCTCCTCCTCTGAGCTGTCAAATTGCTCGTAGCATTGCAAGTCAAT  
>HPV67\_Alpha\_3228267\_nt774\_E7\_VE\_rc|1  
TCCTAGTGTGTTTATAAGCATCTGCTGGATTGTTTCGGACGTCTGCTGCTGTACTGTGAAT  
>HPV88\_Gamma\_167600365\_nt593\_E7\_VE\_rc|1  
ACTGGTATCTATTTGGAAAGGTTCTCGCTCCTCCTCCTGGGTCTCCTCATCAGATGA  
>HPV1\_Mu\_9626063\_nt740\_E7\_VE\_rc|1  
TAGGGTGCACAGTGGGCACACGATGTTCAAAGATCGCAGAAGGAGTTCCTCCAGCTGTCT  
>HPV48\_Gamma\_9628542\_nt668\_E7\_VE\_rc|1  
TTGCTCAAAACAACGTATTCCAAATTCAGTTGCAGCGACTGTCACCCCTTATGCGACAGCC  
>HPV83\_Alpha\_5059324\_nt481\_E7\_VE\_rc|1  
ACAGTCCCTATCATCCTCCTCCTCTGAGCTGTCTATACCTTGTTTCATTACAATATAGGTC  
>HPVFA75/KI88-03\_Unclassified\_206902429\_nt606\_E7\_VE\_rc|1  
TAATTCTTCGTAGCAATGCAGGTCAATGGGCTGGACAAGCTCTTGCAGTTCAGAACAAAT  
>HPV73\_Alpha\_1491692\_nt671\_E7\_VE\_rc|1  
ACACTTCGTGCAGTCAGTAACTATTCTGTAACTCTCGTTCAGCTTGTCTGTCTAGATG

>HPV69\_Alpha\_6970418\_nt625\_E7\_VE\_rc|1  
ATCCTCCTCTGAGCTGTCAAATTGTTTCATAGTCCAATTGTTTCGTAACACTGTAGGTCAAT  
>HPV24\_Unclassified\_9628486\_nt683\_E7\_VE\_rc|1  
TCTTTTCAGGCTCCACCTCCGTATCCTGCTCTGGCAACTCCTCTTCACAGTGCAAATCAAC  
>HPV35\_Alpha\_333050\_nt653\_E7\_VE\_rc|1  
GGTGTCTGGTTTTGCTTGTCCAGCTGGACCGTCAATAGTATCTTCCTCCTCCTCTGAGCT  
>HPV27\_Alpha\_396964\_nt660\_E7\_VE\_rc|1  
TCTGCCGCACTTGCAGCAGGTTGTTACCACCCCGTAGGCCTGCACAGCTGGTTCTGTCAG  
>HPV42\_Alpha\_333211\_nt627\_E7\_VE\_rc|1  
TCTGTAACGCTGTATGTCCTGTTTGGCTTGGTCATCTTCATCTGAGCTGTCCAATTGTTT  
>HPV93\_Beta\_37089393\_nt552\_E7\_VE\_rc|1  
AGGCTCTGGTGGTGTCAACCCTAACACAATGTCTTGCAGAGTGACCTCTTTTCCAATCAT  
>HPV67\_Alpha\_3228267\_nt624\_E7\_VE\_rc|1  
CATGCCTACTTCATCCTCCTCATCTGAGCTGTCTATGCAATTGCTCATAGCAGTATAGGTC  
>HPV80\_Beta\_2911565\_nt653\_E7\_VE\_rc|1  
TAACTCTTCGTAGCAATGCAGGTCAAGTGGGCTGGACAAGCTCTTGCAGCTCAAGCTCTAT  
>HPVcand89\_Alpha\_22095322\_nt631\_E7\_VE\_rc|1  
CAGGTTCATTCAGCAGCAGCTGTTGTAGATGTCTTAGATGTGCGTCGTCAGACAATACTAC  
>HPV93\_Beta\_37089393\_nt642\_E7\_VE\_rc|1  
GCAGAACACAATAATCTTGAAAGCTGTTCTTGCAGGCTCCTCCTCCGTATCCTGCTCGGT  
>HPVRTRX7\_Unclassified\_30315616\_nt728\_E7\_VE\_rc|1  
CTCCGTTTCCTGTTTCGTTTGGTAATTCCTCTTCACAAAGCAGGTCAACTGGTATCACTTC  
>HPV49\_Beta\_9627363\_nt674\_E7\_VE\_rc|1  
CTCCAACCTCTTGTTTCAGCTGGCGCTTCAGCTGTTAGATTCTCGTAGCATTGCAGGTCAAT  
>HPVcand85\_Alpha\_4574720\_nt828\_E7\_VE\_rc|1  
CAAAAATGATAGCGTGCCCAAAAACAGCTGCTGGAGATCTCGTAGATCGGCTGCTGAACT  
>HPV35\_Alpha\_333050\_nt623\_E7\_VE\_rc|1  
GTCAATAGTATCTTCCTCCTCCTCTGAGCTGTCTACACAATTGCTCATAACAGTATAGGTC  
>HPV69\_Alpha\_6970418\_nt655\_E7\_VE\_rc|1  
GGCTTGCTGGTTACGCACATTATCTGTTTCATCCTCCTCTGAGCTGTCAAATTGTTTCATA  
>HPV93\_Beta\_37089393\_nt612\_E7\_VE\_rc|1  
TGCAGGCTCCTCCTCCGTATCCTGCTCGGTTGGTAACTCCTCTTCACAATTCAATGCAAC  
>HPV4\_Gamma\_9626597\_nt582\_E7\_VE\_rc|1  
TGTAATCTCATACTCATCATCTGAAGATTGCAAGACCTCCTCACTCAGCAGGTTTGCTGG  
>HPV22\_Beta\_1020178\_nt644\_E7\_VE\_rc|1  
AATGGGCAGGACAAGCTCTTCAAGAACTATATCACACAGAGTAGCTTGTTTCCCAATCAT  
>HPVcand86\_Alpha\_15741127\_nt484\_E7\_VE\_rc|1  
ACAATCCCTATTATCCTCCTCCTCTGAGCTGTCTAACAATTGCTCGTCACAATGTAGGTT  
>HPV77\_Alpha\_2911558\_nt555\_E7\_VE\_rc|1  
GCTGTCTAATTGCTCATTCATAGTAAAGGGACGGCCTCTGGTGCAAGATCCAATTCAAT  
>HPV32\_Alpha\_9627327\_nt531\_E7\_VE\_rc|1  
GTCACACGTTGGCAGGTCATACAAAATAATGTCCTTTAGCGTTGGTGCGTTTCCACGCAT  
>HPVcand89\_Alpha\_22095322\_nt601\_E7\_VE\_rc|1  
TCTTAGATGTGCGTCGTCAGACAATACTACTAACCTAACTGCACGATAGCACACACCACA  
>HPV81\_Alpha\_40804509\_nt663\_E7\_VE\_rc|1  
CGTAGTAACCACTTATAGGCCTGCTGTGCTTGTCTACTAGTTGCTCACCCTGTCCCT  
>HPV52\_Alpha\_397038\_nt644\_E7\_VE\_rc|1  
GGCTTGTTCTGCTTGTCCATCTGGCCGGTCCACACCATCTGTATCCTCCTCATCTGAGCT  
>HPV110\_Beta\_186461194\_nt625\_E7\_VE\_rc|1  
CTCCTCGTAGCAATGCAGGTCAAGCTGGGCTGAACAAGCTCTTGCAATTCCAGAACAAT  
>HPV19\_Beta\_396940\_nt751\_E7\_VE\_rc|1  
TGTTTTCTGCTGTTTCGGTTCGGTAACTCCTCTTCACAAAACAGGTCAACTGGTTGTACCTC  
>HPV55\_Alpha\_1020266\_nt591\_E7\_VE\_rc|1  
GGCTAGTTCATCCACCTCATCCTCTGAGCTGTCTAATTGCTCATTGCAATGTAGGCCTAC  
>HPV59\_Alpha\_557236\_nt633\_E7\_VE\_rc|1

CAAAGGATGATTAACCTCCATCTGGTTCATCTTTTTTCATTCTCGGAGTCGGAGTCAGGTAA  
>HPV26\_Alpha\_9627305\_nt677\_E7\_VE\_rc|1  
TCTGTAACACACTTCTTGTCCAGCTTGTCTGGCCTGCTGGTCACGCATATTATCTGTTTC  
>HPV43\_Alpha\_40804474\_nt561\_E7\_VE\_rc|1  
GCTGTCTAATTGCTCGTTACAGGTTAAGCTTCTAGGTTCTGGTTGCATAGTTAGCACATA  
>HPV13\_Alpha\_85827580\_nt563\_E7\_VE\_rc|1  
GCTGTCTAATTGCTCATTGCAATGTAGACCTACAGGGTCAGGAGTCAGGTCTAAAACAAT  
>HPV54\_Alpha\_9628437\_nt717\_E7\_VE\_rc|1  
ATGAAGCAGTTCCTGCAGTACCCTTATGCCTGTGTGCGTGCTATACACACATAGCCGTAC  
>HPV1\_Mu\_9626063\_nt710\_E7\_VE\_rc|1  
AGATCGCAGAAGGAGTTCCTCCAGCTGTCTAATGGCGCTGTGATCCGCGAGGACGGTCAA  
>HPV37\_Beta\_1020226\_nt623\_E7\_VE\_rc|1  
CTGGACAAGCTCTTGCAGCTCAAGCACTATTTCTGGTATTGTAGCTTCTTTCCCAATCAT  
>HPV92\_Beta\_27531786\_nt580\_E7\_VE\_rc|1  
AGGTGCAGGCTCCTCCTCCTGATTTTCTGACAAGTCTTCGTCACAATGCAGGTCAATGGG  
>HPV107\_Beta\_126131393\_nt739\_E7\_VE\_rc|1  
CTCTTCGTAACAATGCAGGTCAATGGGCTGAGCAAGCTCTTGCAGCTCTTCCAGAACTAT  
>HPV83\_Alpha\_5059324\_nt511\_E7\_VE\_rc|1  
TGCTTGTTCTGCCAGTTGGTCACGCACGCCAGTCCCTATCATCCTCCTCCTCTGAGCT  
>HPV107\_Beta\_126131393\_nt769\_E7\_VE\_rc|1  
TTCCTAGTAGCATCTGGAAGCTCTGGTAAGTCTTCGTAACAATGCAGGTCAATGGGCTG  
>HPV6\_Alpha\_6002612\_nt622\_E7\_VE\_rc|1  
TTGTTTTTAAAGGTTGTGAATCTTGTCCGTCCTTCGTCACCTCATCTTCTGAGCTGTC  
>HPV27\_Alpha\_396964\_nt630\_E7\_VE\_rc|1  
CCCGTAGGCCTGCACAGCTGGTTCTGTCTAGTTGATGGTTATTCTCTTCTTCTGAGCTGTC  
>HPV82\_Alpha\_6970427\_nt626\_E7\_VE\_rc|1  
ATTATCTACTTCATCCTCCTCGTCTGAGCTGTCAAATTGCTCGTAGCATTGCAAGTCAAT  
>HPV90\_Alpha\_22138122\_nt454\_E7\_VE\_rc|1  
GGCTAATTGCTCGTTACAATGTAGGTCAACCGCATCAGGCTGATCCAGCTCTAGAAATAT  
>HPV60\_Gamma\_9628566\_nt648\_E7\_VE\_rc|1  
AGTAAATCTAACACCTGCTCCACAAGGTTTGAACAGGTGTCTATTGTATAGGGATAGTG  
>HPV76\_Beta\_2911551\_nt644\_E7\_VE\_rc|1  
TGGTAAGTTCTCGTAGCATTGCAGGTCAATGGGCTGGCCAAACTCTTCTTGTAGCACAAAT  
>HPV76\_Beta\_2911551\_nt674\_E7\_VE\_rc|1  
CTCTGTGTCTTGTTCAGCTGGCACTTCAGCTGGTAAGTTCTCGTAGCATTGCAGGTCAAT  
>HPV8\_Beta\_333074\_nt714\_E7\_VE\_rc|1  
CTCCGTTTCTGTTCTGTTTGGTAATTCCTCTTCACAAAGCAGGTCAACTGGTAACACTTC  
>HPV28\_Alpha\_1020202\_nt669\_E7\_VE\_rc|1  
TGCCCTTATATCTGCGTGGCTGCACTCTACCACCAGTCGCAGTGGTGAACCTACACTTTGG  
>HPV63\_Mu\_9626605\_nt735\_E7\_VE\_rc|1  
CAGGGGACACACGATCCTCAGTGAGCCTAACAGCAGCTCCTCCAGACGCGTAAGAGTAGA  
>HPV35\_Alpha\_333050\_nt683\_E7\_VE\_rc|1  
ACAACAGGACGTTACAATATTATAATTGGAGGTGTCTGGTTTTGCTTGTCCAGCTGGACC  
>HPV47\_Beta\_333062\_nt699\_E7\_VE\_rc|1  
GTCGCAAAACAGGTCAACTGGTAATACTTCAGGTTGAACCTCACTTAACTCCAGAACAAT  
>HPV90\_Alpha\_22138122\_nt484\_E7\_VE\_rc|1  
GTCCTCCCTATTATCCTCCTCTTCTGAGCTGGCTAATTGCTCGTTACAATGTAGGTCAAC  
>HPV2\_Alpha\_9626032\_nt650\_E7\_VE\_rc|1  
TCTGCCACACTTACAGCAGGTAGTTACCACCCGTAGGCCTGCACATCTGGTTCTGTCTAG  
>HPV102\_Alpha\_71726718\_nt571\_E7\_VE\_rc|1  
CACTGCCAGTCTCAGTGAAGTGGCCACACATACCACACTTTGTTACCACCCTATAGGCCTG  
>HPV51\_Alpha\_333087\_nt651\_E7\_VE\_rc|1  
AGCCCGTCTTTCTGGTAGCTGGTCACGCATATTATCTACTTCATCCTCCTCCTCTGAGCT  
>HPVcand62\_Alpha\_39932599\_nt454\_E7\_VE\_rc|1  
GTCTAACAATTGCTCGTGGCAATGTAGGTCAACCACATCGGGACGCTCTTGTAGGACAAT

>HPV97\_Alpha\_71726694\_nt607\_E7\_VE\_rc|1  
GTGACGCTGTGGTTCAGCTCGTCGGGCTGGTAGTTGTCGATGATTAACATCATCTGTTTC  
>HPV47\_Beta\_333062\_nt669\_E7\_VE\_rc|1  
AGGTTGAACCTCACTTAACTCCAGAACAATATCTCGCACGGTGACCTCTTTACCAATCAT  
>HPV94\_Alpha\_40804528\_nt606\_E7\_VE\_rc|1  
ACATACTGTTACCACCCTATACGCTTGTTGTGCTGGTTCCACCACATCTGTATAATCTTC  
>HPV16\_Alpha\_9627100\_nt773\_E7\_VE\_rc|1  
CACAAATTCCTAGTGTGCCCATTAACAGGTCTTCCAAAGTACGAATGTCTACGTGTGTGCT  
>HPV58\_Alpha\_222386\_nt665\_E7\_VE\_rc|1  
TGTGGCCGGTGTGCTTGTCATCTGGCCCGTCCAAGCCTATTTTCATCCTCGTCTGAGCT  
>HPV50\_Gamma\_9628550\_nt698\_E7\_VE\_rc|1  
ACACAGAAAAGAAAATTCTGATTGAAGAAGGCACTCAAACACACGGATAGCTGCGTCGGT  
>HPVcand85\_Alpha\_4574720\_nt768\_E7\_VE\_rc|1  
TTCCACCACTAACTGCAGACTGGCCTCACATTTACAACACACGCAGCAAATAGTGTGACG  
>HPV32\_Alpha\_9627327\_nt771\_E7\_VE\_rc|1  
ACACAATGGACACACAATGCCAGTGTGTCCAGAAGCATCTGATGCAGCTGTTGTATGTC  
>HPV31\_Alpha\_333048\_nt621\_E7\_VE\_rc|1  
ACTGTCTATGACATCCTCCTCATCTGAGCTGTCGGGTAATTGCTCATAACAGTGGAGGTC  
>HPV18\_Alpha\_9626069\_nt741\_E7\_VE\_rc|1  
GGCTTCACACTTACAACACATACACAACATTGTGTGACGTTGTGGTTCGGCTCGTCGGGC  
>HPV76\_Beta\_2911551\_nt614\_E7\_VE\_rc|1  
GGGCTGGCCAAACTCTTCTTGTAGCACAAATGTCAGGTAATGTAGCCTCTTTCCCAATCAT  
>HPV74\_Alpha\_27462483\_nt490\_E7\_VE\_rc|1  
CGTGGCTAGTTCATCCACCTCCTCTTCTGAGCTGTCTAATTGCTCATTGCAAAGTAGGCC  
>HPV26\_Alpha\_9627305\_nt647\_E7\_VE\_rc|1  
GGCCTGCTGGTCACGCATATTATCTGTTTCATCCTCATCTGAGCTGTCAAATTGTTCTATA  
>HPV59\_Alpha\_557236\_nt693\_E7\_VE\_rc|1  
ACACTTACAACACACACACAATGTTGTGACGCTGTGGTTCAGCTCGTCTAGCTAGTAG  
>HPVFA75/KI88-03\_Unclassified\_206902429\_nt636\_E7\_VE\_rc|1  
ATCTTCACTAGGAACATCTGGAAGCTCTGGTAATTCCTTCGTAGCAATGCAGGTCAATGGG  
>HPV12\_Beta\_396910\_nt724\_E7\_VE\_rc|1  
CTCCGTTTCCTGCTCGTTTGGTAATTCCTCTTCACAAAGCAGGTCAACTGGTAACACTTC  
>HPV110\_Beta\_186461194\_nt685\_E7\_VE\_rc|1  
AGCAGCAACAATCTTGTAAGGTGTATGACGTGACTCCTCCTCTGTTTCTTCTCAGTTAA  
>HPV35\_Alpha\_333050\_nt743\_E7\_VE\_rc|1  
CAATTTACGTATGTCAATGTGTGTGCTCTGTACACACAGACGTAGTGTGCCTCACATTT  
>HPV16\_Alpha\_9627100\_nt683\_E7\_VE\_rc|1  
CTTGCAACAAAAGGTTACAATATTGTAATGGGCTCTGTCCGGTTCTGCTTGTCCAGCTGG  
>HPV63\_Mu\_9626605\_nt645\_E7\_VE\_rc|1  
CTGATCGCACAAACCACAAGGAAGCACAAATTGCATATGGATATTCAGACTCCTCCTCCTC  
>HPV48\_Gamma\_9628542\_nt638\_E7\_VE\_rc|1  
TGCAGCGACTGTCACCCTTATGCGACAGCCACAATTGTGACACTTGGAGTCTATCCGGTA  
>HPV54\_Alpha\_9628437\_nt657\_E7\_VE\_rc|1  
TGTCTTACAACACACACCTCCACACTGGCTTAAACACCTTAAATGCTTGTGTCAGGTTG  
>HPV41\_Nu\_9626041\_nt885\_E7\_VE\_rc|1  
GACACAGGCGTGACAAGCGAGGTCAAGGTGACTGTTGACCAGGAGTGCCTGTAGATTCCG  
>HPV15\_Beta\_396924\_nt653\_E7\_VE\_rc|1  
TAACTCTTCGTAGCAATGCAGGTCAGTGGGCTGGACAAGCTCTTGCAGCTCAAGCACTAT  
>HPV45\_Alpha\_397022\_nt738\_E7\_VE\_rc|1  
GTCACACTTACAACATACACACAAAATTTGTGACGCTGTGGTTCGGCTCGTCGGGCTGG  
>HPV63\_Mu\_9626605\_nt615\_E7\_VE\_rc|1  
TGCATATGGATATTCAGACTCCTCCTCCTCAGCAGGTATATCCTCATAACAATTTAGATC  
>HPV45\_Alpha\_397022\_nt708\_E7\_VE\_rc|1  
GTGACGCTGTGGTTCGGCTCGTCGGGCTGGTAGTTGTGCATGACTAACTCCATCTGCTTC  
>HPV24\_Unclassified\_9628486\_nt713\_E7\_VE\_rc|1

GCCGCAACAAAGTATTATTTTGTAAAGCTCTTCTTTTCAGGCTCCACCTCCGTATCCTGCTC  
>HPV44\_Alpha\_1020242\_nt594\_E7\_VE\_rc|1  
GGCTAGTTCATCCACCTCATCTTCTGAGCTGTCTAATTGCTCATTGCAATGTAGGCCTAC  
>HPV36\_Beta\_1020218\_nt724\_E7\_VE\_rc|1  
CTCCTCCGTATCCTCGTTTGGTAATTCCTCTTCACAAAACAGGTCAACTGGTAGTACTTC  
>HPV43\_Alpha\_40804474\_nt621\_E7\_VE\_rc|1  
TTGTAGATTCACTTGCTGGTCCTGTTGCGTGGGTTGCTCACGCTCATCCTCTGAGTCTGA  
>HPV75\_Beta\_2911544\_nt644\_E7\_VE\_rc|1  
TGCTAAATCCTCGTAGCATTGCAGGTCAATGGGCTGGCCAAACTCTTCTTGTAGCACAAT  
>HPV54\_Alpha\_9628437\_nt747\_E7\_VE\_rc|1  
GGTGGGACACACTATTTGCAGTGGCTCCTGATGAAGCAGTTCCTGCAGTACCCTTATGCC  
>HPVcand86\_Alpha\_15741127\_nt544\_E7\_VE\_rc|1  
ACACAACCCACATTCTGTAAACACCCTATAGGCCAGCTGTGCTGGTTCTGCAGGTTGGTC  
>HPV103\_Unclassified\_109390382\_nt152\_E7\_VE\_rc|1  
AATGCCCTCCTCCGTGGCTACCACATACATACACAATGACTTCTCACAATACTTGCAATC  
>HPV4\_Gamma\_9626597\_nt522\_E7\_VE\_rc|1  
TAACACTAAGTCATTTAGTTCTAAATTAAGATCTGCAACCGTGGGCGCTGCTCCTCTCAT  
>HPV39\_Alpha\_333245\_nt653\_E7\_VE\_rc|1  
ATCTATTTCATCCTCTGACTCTCCTAATTGCTCGTGACATACAAGGTCAACCGGCTGTAT  
>HPV95\_Gamma\_40804520\_nt561\_E7\_VE\_rc|1  
CAAGACCTCATCGCTCAGCAAATTTGCAGGAACAACCTAATCATGGAGGTTTAAATCAAC  
>HPV91\_Alpha\_22023568\_nt667\_E7\_VE\_rc|1  
GGATTGCTCACGCTCATCCTCTGAGTCTGAGCTGTCTAATTGCTCGTCACAGGTTAAACT  
>HPV101\_Unclassified\_109390389\_nt62\_E7\_VE\_rc|1  
TTGCTCGTCCTGCTGCTCCTCCTCGGTTACTAATTCATCACATAATAAGTTTGCAGG  
>HPV37\_Beta\_1020226\_nt683\_E7\_VE\_rc|1  
ACGCTCCTCCTCTGTCTCTTCTTCACTCAACTCTTCGTAACAATGCAGGTCAGCAGTGGG  
>HPV33\_Alpha\_333049\_nt694\_E7\_VE\_rc|1  
AGTGTGACAACAGGTTACAATGTAGTAATCAGCTGTGGCTGGTTGTGCTTGTCATCTGG  
>HPV38\_Beta\_1020234\_nt653\_E7\_VE\_rc|1  
ATCAGGCAACTCCTCGTGGCAATGCAGGTCAATGGGCTGGACAAGCTCTCAAGAACTAT  
>HPV32\_Alpha\_9627327\_nt741\_E7\_VE\_rc|1  
CAGAAGCATCTGATGCAGCTGTTGTATGTCCGCGCCTGTACTACTGACAACAAGTTTAAC  
>HPV26\_Alpha\_9627305\_nt617\_E7\_VE\_rc|1  
ATCCTCATCTGAGCTGTCAAATTGTTTCATAGTCCAATTGTTTCGTAGCAGCGTAGGTCAAT  
>HPV95\_Gamma\_40804520\_nt711\_E7\_VE\_rc|1  
TTCCAGAAGAAGTTGTTCCACGACTCGTAGTCCAAATGCAACAGCATACAAAGTGATTCT  
>HPV39\_Alpha\_333245\_nt743\_E7\_VE\_rc|1  
CTTACAACACGAACACTGTATTGTGTGACGCTGTGGTTCATCCCGTCTGGCTAGTAGTTG  
>HPV33\_Alpha\_333049\_nt664\_E7\_VE\_rc|1  
AGCTGTGGCTGGTTGTGCTTGTCCATCTGGCCGGTCCAAGCCTTCATCCTCATCTGAGCT  
>HPV96\_Beta\_50253426\_nt794\_E7\_VE\_rc|1  
CAACTCTTCGTCACAATGCAGGTCAATGGGCGAGACAAGGTCTTGCAGCTCCAGCTTTAT  
>HPV96\_Beta\_50253426\_nt824\_E7\_VE\_rc|1  
TTCTGACAGGTTTTCTGACTGCTCTTCTGTCAACTCTTCGTCACAATGCAGGTCAATGGG  
>HPVcand89\_Alpha\_22095322\_nt481\_E7\_VE\_rc|1  
ACAATCCCTAGCATCTTCCTCATCTGAGCTGTCTAGCATTCTTCCTCACATTGTAGGCT  
>HPV101\_Unclassified\_109390389\_nt92\_E7\_VE\_rc|1  
ATCTGTGCACAATTCTATAAGGGCTTAAAGCTTGCTCGTCCTGCTGCTCCTCCTCCTCGGT  
>HPV102\_Alpha\_71726718\_nt541\_E7\_VE\_rc|1  
ACCACACTTTGTACCACCTATAGGCCTGCTTTGCTTGTCTGCCAGTTGGTCACGCAC  
>HPV52\_Alpha\_397038\_nt764\_E7\_VE\_rc|1  
TTGTAATGTGCCCAACAGCATTTGCTGTAGAGTACGAAGGTCCGTCGCAGTGCTATGAAT  
>HPVcand85\_Alpha\_4574720\_nt738\_E7\_VE\_rc|1  
TTTACAACACACGCAGCAAATAGTGTGACGCTGTAGTTCTTCTCGTCTGGCTAGTAGTGG

>HPV10\_Alpha\_9627257\_nt675\_E7\_VE\_rc|1  
CAGTGCCCTTATATCTGCGTGGCTGCACTCTACCACCAGTCGCAGTGGTAAACTACACTT  
>HPV94\_Alpha\_40804528\_nt516\_E7\_VE\_rc|1  
GATGTCTCTGGTGCAAGACTCAATTCTATATCTTTTACTGTGGGATGCGGACCGTGCAT  
>HPV37\_Beta\_1020226\_nt653\_E7\_VE\_rc|1  
CTCTTCGTAACAATGCAGGTGAGCTGGGCTGGACAAGCTCTTGCAGCTCAAGCACTAT  
>HPV33\_Alpha\_333049\_nt634\_E7\_VE\_rc|1  
CCGGTCCAAGCCTTCATCCTCATCTGAGCTGTCACCTAATTGCTCATAGCAGTATAGGTC  
>HPV48\_Gamma\_9628542\_nt518\_E7\_VE\_rc|1  
AGCAGGCAAAACAAGCTCTTCTAACTCTATGTCAGGAATAGTAGCCTTATCTCCCTCAT  
>HPV1\_Mu\_9626063\_nt680\_E7\_VE\_rc|1  
AATGGCGCTGTGATCCGCGAGGACGGTCAATCGAACAGTTTCTCGCAATAGGCACAGGA  
>HPV42\_Alpha\_333211\_nt597\_E7\_VE\_rc|1  
GTCATCTTCATCTGAGCTGTCCAATTGTTTCATAGCAATACAGGTCAATGGGTGTCTCACA  
>HPVcand87\_Alpha\_14475578\_nt648\_E7\_VE\_rc|1  
CCCACACTCTGTAAACACCCTATGGGCCAGCTGTGCTGGTTCTGCAGGTGGTTCACGCAC  
>HPV24\_Unclassified\_9628486\_nt743\_E7\_VE\_rc|1  
AAATAATCGAAGCCGGGTTCCACAACCGCCGCCGCAACAAAGTATTATTTGTAAGCTCT  
>HPV52\_Alpha\_397038\_nt614\_E7\_VE\_rc|1  
CACACCATCTGTATCCTCCTCATCTGAGCTGTACCTAATTGCTCATAGCAGTGTAGGTC  
>HPV110\_Beta\_186461194\_nt655\_E7\_VE\_rc|1  
TGACTCCTCCTCTGTTTCTTCTTCAGTTAACTCCTCGTAGCAATGCAGGTGAGCAGTGGG  
>HPVcand85\_Alpha\_4574720\_nt798\_E7\_VE\_rc|1  
CTGGAGATCTCGTAGATCGGCTGCTGAACTTTCCACCACTAACTGCAGACTGGCCTCACA  
>HPV101\_Unclassified\_109390389\_nt182\_E7\_VE\_rc|1  
CAGGTCTCCACACAGCAGTTGTTCCACAGACCTTATTGCCCGTCCGTAGCTAGTACATG  
>HPV111\_Beta\_186461202\_nt609\_E7\_VE\_rc|1  
CAATTCTTCGTAGCAATGCAGGTGAGTGGGTTGGACAAGCTCTTGCAGCTCAAGAACTAC  
>HPV40\_Alpha\_397014\_nt558\_E7\_VE\_rc|1  
GCTGTCTAATTGCTCGTTGCAGTTTAGACATACAGGTTTCAGGGTGCAGGTTTAACACAAT  
>HPV61\_Alpha\_9628574\_nt579\_E7\_VE\_rc|1  
CACACTATCCTCCTCCTCTGACTCTGAGCTGTCTAATAACTGCTCATTGCAATGTAGGTC  
>HPV40\_Alpha\_397014\_nt648\_E7\_VE\_rc|1  
TACTTGCAGGTCCTGTTGCGTGGGTTGCTCAGCTCTCTACTGTGTAAGCTGTCTAGTTG  
>HPV40\_Alpha\_397014\_nt588\_E7\_VE\_rc|1  
GTCCTGTTTCATGGTCATCTTCTGAGTCTGAGCTGTCTAATTGCTCGTTGCAGTTTAGACA  
>HPV67\_Alpha\_3228267\_nt684\_E7\_VE\_rc|1  
ACACACAGTAACAATATGGTAATTGGTTGTATCTGGTTTTGCTTGTCCATCTGGCCGGTC  
>HPV68a\_Alpha\_71726685\_nt755\_E7\_VE\_rc|1  
CTGGGTTTCAGTTGCACACCACGGACACACAAAATTTAGTGAGTCCATAAACAGCTGTTG  
>HPV11\_Alpha\_333026\_nt591\_E7\_VE\_rc|1  
CACCTTGTCACCTCATCTTCTGAGCTGTCTTCTAATTGCTCATAGCAATGTAACCCTAC  
>HPVcand85\_Alpha\_4574720\_nt708\_E7\_VE\_rc|1  
CTGTAGTTCTTCTCGTCTGGCTAGTAGTGGTTGTCGGTGATTAATTGCATTATCTGGTTC  
>HPVcand87\_Alpha\_14475578\_nt618\_E7\_VE\_rc|1  
CTGTGCTGGTTCTGCAGGTTGGTCACGCACACAATCCCTATTGTCTCCTCCTCTGAGCT  
>HPV54\_Alpha\_9628437\_nt687\_E7\_VE\_rc|1  
TGTGTGCGTGCTATACACACATAGCCGTACTGTCTTACAACACACACCTCCACACTGGCT  
>HPV1\_Mu\_9626063\_nt650\_E7\_VE\_rc|1  
TCGAACCAGTTTCTCGCAATAGGCACAGGAACGACAGCATAAGGTTGCTGAGGCGA  
>HPVcand62\_Alpha\_39932599\_nt484\_E7\_VE\_rc|1  
GTCCCTATCATCCACCTCTTCTCTGAGCTGTCTAACAATTGCTCGTGGCAATGTAGGTC  
>HPV68a\_Alpha\_71726685\_nt545\_E7\_VE\_rc|1  
ATCTATTTTCATCGTCTGAATCTCCTAATTGCTCGTGACATACAAGGTCAACCGGCTGTAT  
>HPVFA75/KI88-03\_Unclassified\_206902429\_nt576\_E7\_VE\_rc|1

CTGGACAAGCTCTTGCAGTTCCAGAACAAATATCTGGAATAGTAACTTCTTTCCCAATCAT  
>HPV16\_Alpha\_9627100\_nt653\_E7\_VE\_rc|1  
GGCTCTGTCCGGTCTGTGTTGTCCAGCTGGACCATCTATTTTCATCCTCCTCCTCTGAGCT  
>HPVTRX7\_Unclassified\_30315616\_nt698\_E7\_VE\_rc|1  
TTCACAAAGCAGGTCAACTGGTATCACTTCAGGCTGCACCTCACTAAGCTCCAAAATAAA  
>HPV24\_Unclassified\_9628486\_nt623\_E7\_VE\_rc|1  
AGTCTGTGGCTCAGTCAACTCTAAGACAATGTCTTGTAGAGTGACCTCTTTTCCAATCAT  
>HPV41\_Nu\_9626041\_nt795\_E7\_VE\_rc|1  
TCGTATGATAGCCTGGCAAAATGGACACTGACTCTCTACCAGGTATAATGTTCTCCTGGG  
>HPV47\_Beta\_333062\_nt729\_E7\_VE\_rc|1  
CTCCGCTGTTGTTTCATTTGGTAATTCCTCGTCGCAAAACAGGTCAACTGGTAATACTTC  
>HPV31\_Alpha\_333048\_nt681\_E7\_VE\_rc|1  
CTGACAACAAAAGGTAACGATATTGTAATTGGATGTGTCCGGTCTGCTTGTCCAGCTGG  
>HPV41\_Nu\_9626041\_nt855\_E7\_VE\_rc|1  
ACTGTTGACCAGGAGTGCCTGTAGATTCCGTATCCCAGTGTTGCTTGCTACGCATACAAA  
>HPV59\_Alpha\_557236\_nt783\_E7\_VE\_rc|1  
ACACACAAAGGATAGTGTGTCCATAAACAGCTGCTGTAAGGCTCGCAATCCGTCTTGCGA  
>HPV103\_Unclassified\_109390382\_nt242\_E7\_VE\_rc|1  
GTGTCTTTGTCCCTCCATTTTCGCTGGCGTTGCTTTGCACAGGCTGGACACACAATATCCAG  
>HPV81\_Alpha\_40804509\_nt693\_E7\_VE\_rc|1  
CAGCCTAACTAAACACCTACAAATACCACAGTAGTAACACCCTATAGGCCTGCTGTGC  
>HPVcand89\_Alpha\_22095322\_nt571\_E7\_VE\_rc|1  
TAACCTAACTGCACGATAGCACACACCACACGATGTTACCACCCTAAAGGCCTGCTGTGC  
>HPV7\_Alpha\_9627389\_nt558\_E7\_VE\_rc|1  
GCTGTCTAATTGCTCGTTGCAACTTAACTTACTGGTTTCGGGTTGCAAGCTAACACGAT  
>HPV25\_Beta\_396948\_nt736\_E7\_VE\_rc|1  
TGTTTCTGATGCTCAGCCGGCAACTCCTCTTCACAAAACAGGTCAACTGGTTGTACCTC  
>HPV97\_Alpha\_71726694\_nt637\_E7\_VE\_rc|1  
CTCACATTTACAACACATACACACAATTGTGTGACGCTGTGGTTTCAGCTCGTCGGGCTGG  
>HPV52\_Alpha\_397038\_nt674\_E7\_VE\_rc|1  
ACAATATGTCACAATGTAGTAATTGCTTGTGGCTTGTCTGCTTGTCCATCTGGCCGGTC  
>HPV42\_Alpha\_333211\_nt747\_E7\_VE\_rc|1  
CAAAGGACACACAATATCCAGTGTGCCCAAAAGCATCTGTTGCAGGTTTCTTATGTCCGC  
>HPV22\_Beta\_1020178\_nt674\_E7\_VE\_rc|1  
TTCAGGCAGCTCCTCGTGGCAATGCAGGTCAATGGGCAGGACAAGCTCTTCAAGAACTAT  
>HPV84\_Alpha\_12958167\_nt544\_E7\_VE\_rc|1  
CCCACACTCTGTTACCACCCTATAGGCCAGCTGTGCTGGTTTTGCAGGTTGGTCACGCAA  
>HPV68a\_Alpha\_71726685\_nt575\_E7\_VE\_rc|1  
TTGGTGGTGATTAACTGCATGGTCGGGTTTCATCTATTTTCATCGTCTGAATCTCCTAATTG  
>HPV35\_Alpha\_333050\_nt593\_E7\_VE\_rc|1  
GTCACACAATTGCTCATAACAGTATAGGTCAGTTGCCTCGGGTTCCAAATCTAAACATA  
>HPV72\_Alpha\_1491683\_nt675\_E7\_VE\_rc|1  
AACTGGACGGTAGCACCTGCCACAGGTAGTAACCACCCCGTAGGCCTGCTGTGCTTGTTC  
>HPV63\_Mu\_9626605\_nt705\_E7\_VE\_rc|1  
CAGCAGCTCCTCCAGACGCGTAAGAGTAGACAGGTGAGAAACGCAGGTGAGCCTTAACAG  
>HPV7\_Alpha\_9627389\_nt798\_E7\_VE\_rc|1  
TGTAGCTGCACAGTTGGGGCACACTATATTAGTGTGCCCATCAGCAACTGATGAACCTG  
>HPV4\_Gamma\_9626597\_nt642\_E7\_VE\_rc|1  
AGCAACTTCACATCTATAGCAACAGGTGTCTATTCTAAATGGAACCACCGACTCCTCCTC  
>HPV5\_Beta\_9627145\_nt724\_E7\_VE\_rc|1  
CTCCGTTTCTGCTCGTTTGGTAATTCCTCTTCACAAAACAGGTCAACTGGTAGCACTTC  
>HPV24\_Unclassified\_9628486\_nt833\_E7\_VE\_rc|1  
ATCGCTGTTACGGCAGTCGGGACACAAAATGACCACCTCTTCTAGCAGTAAGTCTTGACG  
>HPV60\_Gamma\_9628566\_nt558\_E7\_VE\_rc|1  
CAACTCCTCATCAGCTAAAAGACTGACAGGTAAAACCAACTCCTCCAAATTTACATCAAG



>HPV65\_Gamma\_312100\_nt522\_E7\_VE\_rc|1  
CAACACCAAGTCATTTAATTCTAAATTAAGATCTGCAACCCTGGGTGCTGCTCCTCTCAT  
>HPV20\_Beta\_1020162\_nt7671\_AOS|1  
AACAGGAGGAAATGTAAGGCTGCCAACGCTTTTGGCTCTTCTTTTGGCACAGCAGAAGA  
>HPV20\_Beta\_1020162\_nt7644\_AOS|1  
CAAACCTTCATCGTCCCAACACGTTTCGGAACAGGAGGAAATGTAAGGCTGCCAACGCTTTT  
>HPV20\_Beta\_1020162\_nt5062\_AOS|1  
GCACACCTATGCAAAGACTTCAAAATGTGTTTCAGGCGTAGAGGAGGCCTTACTAACAGAA  
>HPV20\_Beta\_1020162\_nt4799\_AOS|1  
TGCAGTTCTAGAGGTAGCACCAGAACCAACACCTCCAGCTCGTGTCAGAGTCAGCCGCAC  
>HPV20\_Beta\_1020162\_nt4740\_AOS|1  
CCAGGCCCTCAAGGCCACCAACTGATACACCAGTTACATCTACTACCAGTG GTTCTAGT  
>HPV20\_Beta\_1020162\_nt4733\_AOS|1  
AATACATCCAGGCCCCCTCAAGGCCACCAACTGATACACCAGTTACATCTACTACCAGTGG  
>HPV20\_Beta\_1020162\_nt217\_AOS|1  
TCAGAAGACAGCGCTGATGAAGGACCATCTAATATTGGAGAGGCAAAACCTCCAATCTTA  
>HPV20\_Beta\_1020162\_nt179\_AOS|1  
AATGCAGAGAGTG CAGGCACATGGCTACACCTCCTTCTTCAGAAGACAGCGCTGATGAAG  
>HPV20\_Beta\_1020162\_nt170\_AOS|1  
CATAGAGCTAATGCAGAGAGTG CAGGCACATGGCTACACCTCCTTCTTCAGAAGACAGCG  
>HPV20\_Beta\_1020162\_nt155\_AOS|1  
CATATAGACAGATATCATAGAGCTAATGCAGAGAGTG CAGGCACATGGCTACACCTCCTT  
>HPV21\_Beta\_1020170\_nt7013\_AOS|3  
TGAGAATGCAGACGTGTCTAAAATTGAAAATTATAAAGCCGAGAGCTTTCAAGAATATTT  
>HPV21\_Beta\_1020170\_nt7006\_AOS|2  
TAAATCCTGAGAATGCAGACGTGTCTAAAATTGAAAATTATAAAGCCGAGAGCTTTCAAG  
>HPV21\_Beta\_1020170\_nt6999\_AOS|2  
ATTTTCAGTAAATCCTGAGAATGCAGACGTGTCTAAAATTGAAAATTATAAAGCCGAGAGC  
>HPV21\_Beta\_1020170\_nt5549\_AOS|1  
ATTTATTGATATTAACGTTGATGAAAACCTCTTTCTGAAGATTTTAGTGACATTTCAGA  
>HPV21\_Beta\_1020170\_nt5162\_AOS|1  
TCAACAGGTTAATGTAGAGAATCCTTTGTTGTATCCAGGCCTTCTAGATTAGTGACGTT  
>HPV21\_Beta\_1020170\_nt282\_AOS|1  
TTTAGAGCCACCATTACCAGCTACAATTCGTGACCTAGCCAATCTGTTAGAGATAACCATT  
>HPV21\_Beta\_1020170\_nt273\_AOS|1  
ATCTAGCTTTTTCAGAGCCACCATTACCAGCTACAATTCGTGACCTAGCCAATCTGTTAGA  
>HPV21\_Beta\_1020170\_nt266\_AOS|1  
AAAATACATCTAGCTTTTTTAGAGCCACCATTACCAGCTACAATTCGTGACCTAGCCAATC  
>HPV21\_Beta\_1020170\_nt257\_AOS|1  
TAGAAGAAGAAAATACATCTAGCTTTTTTAGAGCCACCATTACCAGCTACAATTCGTGACC  
>HPV22\_Beta\_1020178\_nt6715\_AOS|1  
TGGCAAGTGACGGCACCACAGTTAATTATGATGCTAAAAAATCAGAGAATTTATGCGCC  
>HPV22\_Beta\_1020178\_nt3899\_AOS|1  
TCTAGGATACTAATATCATTTTCATACAGATAGGGAAAGAGAGAAGTGCTTGCAACAAATG  
>HPV22\_Beta\_1020178\_nt3889\_AOS|1  
AATCGGGCGCTCTAGGATACTAATATCATTTTCATACAGATAGGGAAAGAGAGAAGTGCTT  
>HPV22\_Beta\_1020178\_nt3877\_AOS|1  
TACAACCGATAGAATCGGGCGCTCTAGGATACTAATATCATTTTCATACAGATAGGGAAAG  
>HPV22\_Beta\_1020178\_nt845\_AOS|1  
AACTCTCTCTGGAATTCGCGACTTTCAAACATCTCTACTTGGACCTGTAAAACTTTTGTG  
>HPV22\_Beta\_1020178\_nt837\_AOS|1  
ATACTAGCAACTCTCTCTGGAATTCGCGACTTTCAAACATCTCTACTTGGACCTGTAAAA  
>HPV22\_Beta\_1020178\_nt413\_AOS|1  
CCTACGCTTCAGCCCAATTTGAATTTTCAGCAGTATTATCAAGTTACTTTGTATGGTCGTG  
>HPV22\_Beta\_1020178\_nt406\_AOS|1

GGCTGTGCCTACGCTTCAGCCCAATTTGAATTTTCAGCAGTATTATCAAGTTACTTTGTAT  
>HPV22\_Beta\_1020178\_nt181\_AOS|1  
GCATATTATTTAAGTAGGATGGGCTGCTATTCTGTATTTCATGGCTTTGCAAAGACCACTG  
>HPV23\_Beta\_1020186\_nt5544\_AOS|1  
TTACCTAGTGGCCCTGCTGTAGTCATACACACATTGGACAAGTCTTTTGATTATTACTTA  
>HPV23\_Beta\_1020186\_nt5536\_AOS|1  
TATTTCCCTTACCTAGTGGCCCTGCTGTAGTCATACACACATTGGACAAGTCTTTTGATT  
>HPV23\_Beta\_1020186\_nt5529\_AOS|1  
ACTATAATATTTCCCTTACCTAGTGGCCCTGCTGTAGTCATACACACATTGGACAAGTCT  
>HPV23\_Beta\_1020186\_nt5258\_AOS|1  
ACCTCTGCAAAGCACTGTAATAGATATGAACTTAGATGATGTTGAGGCTATTCAGGATAC  
>HPV23\_Beta\_1020186\_nt5246\_AOS|1  
AGTTATTGAGGAACCTCTGCAAAGCACTGTAATAGATATGAACTTAGATGATGTTGAGGC  
>HPV23\_Beta\_1020186\_nt3888\_AOS|1  
GAGTAGGGCGTGCAAGGATGTTAATAGCATTTTCATTCTAATCATGAAAGGGAAAAATGTA  
>HPV23\_Beta\_1020186\_nt3870\_AOS|1  
GGGGTCATTCTACTGATAGAGTAGGGCGTGCAAGGATGTTAATAGCATTTTCATTCTAATC  
>HPV23\_Beta\_1020186\_nt3108\_AOS|1  
CAGTATGGTCTTATATTTACTATCAAAGTATGAGGACACTTGGGAAAAGGTTGAAGGAC  
>HPV23\_Beta\_1020186\_nt1400\_AOS|2  
GGCTGGGACATATTGAAAGTTTGTGAAGATGTAATAATGCTAAAGCAGTGTGCTACATA  
>HPV23\_Beta\_1020186\_nt209\_AOS|1  
TGCATTATTTAAGTAGGATGTGCTACACCAAATTATTGATGGACTCGACGCGACCACTGA  
>HPV28\_Alpha\_1020202\_nt7201\_AOS|1  
CCACGAGAGGATCGTCTGCTGCAAAACGAAAACGCGCCAAAAGTAGCACTACTGTGTTT  
>HPV28\_Alpha\_1020202\_nt4240\_AOS|2  
ACAATGTATTTTTTAAGTACTGTGTATATCCCAGTGTGCTATTGAGCCACTGCCTTTTCTA  
>HPV28\_Alpha\_1020202\_nt4222\_AOS|1  
GTGTGTTAGTTGGTCACCACAATGTATTTTTTAAGTACTGTGTATATCCCAGTGTGCTATT  
>HPV28\_Alpha\_1020202\_nt4101\_AOS|1  
GATCATACTGTCTTCTGGAGCCAGATGACGTGTATCTATTGTTGTTGTTTATATTT  
>HPV28\_Alpha\_1020202\_nt4050\_AOS|1  
CAATACATAAGCCTTGCTATGTATCCTTTGGTGCTAAGGGACAACAATGGCGATCATACT  
>HPV28\_Alpha\_1020202\_nt3090\_AOS|1  
AAACCAAATCCATGTGTTATGTACACTGGAGAGACATATTTACTCAGAACTATAGTGATG  
>HPV28\_Alpha\_1020202\_nt1472\_AOS|1  
GGTTGGGATTTAATGAACTTATCCGACACTTCAAAAGTAGCAAAACCGTTTGCCTAGATT  
>HPV28\_Alpha\_1020202\_nt68\_AOS|1  
AAAAAGAGGCTTACATTGAATGGCAGAAGCTCAATGGATGACCAACGGCCTAAAAACATA  
>HPV29\_Alpha\_1020210\_nt5616\_AOS|1  
TCGCCAGTTGATGTGCCTTTACACACGGGCCCTGATATTATTCTGCCCTCCTCTGCACAA  
>HPV29\_Alpha\_1020210\_nt6608\_AOS|1  
TAGTAGGGGACAAAATCCCAGATTCCCTGTACTTAAAGGGTAACAACGGGCGAGAACTC  
>HPV29\_Alpha\_1020210\_nt6601\_AOS|1  
GCTGGTGTAGTAGGGGACAAAATCCCAGATTCCCTGTACTTAAAGGGTAACAACGGGCGA  
>HPV29\_Alpha\_1020210\_nt6594\_AOS|1  
TAATCGTGTGTTGTAGTAGGGGACAAAATCCCAGATTCCCTGTACTTAAAGGGTAACAA  
>HPV29\_Alpha\_1020210\_nt5609\_AOS|1  
ATTCGTGTCGCCAGTTGATGTGCCTTTACACACGGGCCCTGATATTATTCTGCCCTCCTC  
>HPV29\_Alpha\_1020210\_nt5602\_AOS|1  
CTATTCCATTCTGTGTCGCCAGTTGATGTGCCTTTACACACGGGCCCTGATATTATTCTGC  
>HPV29\_Alpha\_1020210\_nt4180\_AOS|2  
GATTGTTAATACTAATGGTATGCCTGTTGTTATTTATAGTTTATAGACATTTGGGATTAT  
>HPV29\_Alpha\_1020210\_nt4031\_AOS|1  
TTTATACCTAGGATTGGTGGCACTATATTTACAAGTTGTGCAGCACATTGCACGAAACAC

>HPV29\_Alpha\_1020210\_nt2580\_AOS|1  
ACTGCAGGTATTCACATTCAGCAATCCATGTCCATTAACAAGTAAAGGAGAGCCAGTTTA  
>HPV29\_Alpha\_1020210\_nt2090\_AOS|1  
GAATGTCCATGTCTGAGTGGATACGGTTTAGAAGCAACAAAGTACAGGGAGAGGGGGACT  
>HPV36\_Beta\_1020218\_nt7389\_AOS|1  
AGTGTCTTATCGAGGGTTCACCAGAGGAACCAAGCGCAAGCGAAAAACAGTAATATGACCG  
>HPV36\_Beta\_1020218\_nt6951\_AOS|1  
TAGTATTTCAATATATAACAATAATGGGGCACTAAAGGACATCAATGATTACACTGCAGA  
>HPV36\_Beta\_1020218\_nt6695\_AOS|2  
ACGACATCCCTGACGCCAGAATTGATAATGGGACTTTTAAGAATCAGTTTTTCATTCCTG  
>HPV36\_Beta\_1020218\_nt5518\_AOS|1  
CATTTATAGACGTAAATGTGTCTGAAAAATCCTTTGTCTGAAAGTGTGGAAGCCTTTTCTG  
>HPV36\_Beta\_1020218\_nt3618\_AOS|1  
CAAGACTGGGGTCCAGCGGTATCAACCAGATCACGATCCAGAAGCACCTCTAGAAGGGG  
>HPV36\_Beta\_1020218\_nt3611\_AOS|1  
CGCTCGCCAAGACTGGGGTCCAGCGGTATCAACCAGATCACGATCCAGAAGCACCTCTA  
>HPV36\_Beta\_1020218\_nt260\_AOS|2  
TAACTATTAAGGGCCTGTCAGAATCATTAGGCATTCCGTTTGTAGACTGTCTAATACCTT  
>HPV36\_Beta\_1020218\_nt253\_AOS|1  
CTGCCCTTTAACTATTAAGGGCCTGTCAGAATCATTAGGCATTCCGTTTGTAGACTGTCTA  
>HPV36\_Beta\_1020218\_nt183\_AOS|1  
TTAATAATTAAGGCAAATGGCAGAGCAAGCCTCCGAACAGCAGAATATTACAGAAAAAGA  
>HPV37\_Beta\_1020226\_nt6568\_AOS|1  
TACCTGCCAAATCAGACCAGCAGCAGTATCTGTTAGGCAATTCTACCTATTTTCCCCTG  
>HPV37\_Beta\_1020226\_nt6538\_AOS|2  
GCACTGTTAATCAGGACCACAAATATTACTTACCTGCCAAATCAGACCAGCAGCAGTATC  
>HPV37\_Beta\_1020226\_nt6312\_AOS|2  
GACATGTTTGATATAGGGTTCGGAAATATTAACAATAAGGTTCTCTCTACTAATAAATCA  
>HPV37\_Beta\_1020226\_nt6084\_AOS|2  
TTTAATAAATTAAGGGACACTGAGAATAATAGTAATTACCAAGGGGGGTCACGGGATGAT  
>HPV37\_Beta\_1020226\_nt5579\_AOS|1  
AACACAAGTTATCTTGCCACAACCTGAAACACCAACTGTAGTTATTAGATTTGGAGAGGC  
>HPV37\_Beta\_1020226\_nt5337\_AOS|1  
CCAGGTCCCTTAAATATAGGGCAACAAGAGTCTACTATGGCAGATGACACAGATTTTAAT  
>HPV37\_Beta\_1020226\_nt4929\_AOS|1  
GAACAGGTAGCAGTCACGGATCCTTTATTCTTGAGTAGACCCTCACAATTAGTACAGTTT  
>HPV37\_Beta\_1020226\_nt2743\_AOS|1  
CCTAGAGACCCAAATTATGCATTGGCAACTTCTAAGGCAGGAGCAGATCCTGTTTCATTA  
>HPV37\_Beta\_1020226\_nt2736\_AOS|1  
GAGATGACCTAGAGACCCAAATTATGCATTGGCAACTTCTAAGGCAGGAGCAGATCCTGT  
>HPV37\_Beta\_1020226\_nt415\_AOS|1  
TTTACCAGTTTCTATGAGCACTCAGTTAGTGGGAGGGAGATAGAAGAGATAGAGCAAAAG  
>HPV38\_Beta\_1020234\_nt7129\_AOS|2  
TGCTGTCAAACGGCCGTTAGTAAGAAAATCTTCCAAATCTGTAAAACGCAAAAGGACCCA  
>HPV38\_Beta\_1020234\_nt7118\_AOS|1  
GCACGAACACGTGCTGTCAAACGGCCGTTAGTAAGAAAATCTTCCAAATCTGTAAAACGC  
>HPV38\_Beta\_1020234\_nt5426\_AOS|1  
CGTCAATCACTGTACCTAGATTTTCACTCCTCAAATCCTACCATATATTATCAGGATA  
>HPV38\_Beta\_1020234\_nt5413\_AOS|1  
CGCAGATCCACTACGTCAATCACTGTACCTAGATTTTCACTCCTCAAATCCTACCATA  
>HPV38\_Beta\_1020234\_nt5269\_AOS|1  
TTAGTGGATGTAAATGTGACTGAGGTTTCTGAAGGTGTTCTTACAGAACTTCTATGGAT  
>HPV38\_Beta\_1020234\_nt5262\_AOS|1  
AAGCACTTTAGTGGATGTAAATGTGACTGAGGTTTCTGAAGGTGTTCTTACAGAACTTC  
>HPV38\_Beta\_1020234\_nt4509\_AOS|1

AATTGATACCCCTGTTGTGAGTGGAGGCCGCAATACCAATGCTATATTGGAAGTGGCTGA  
>HPV38\_Beta\_1020234\_nt4492\_AOS|1  
CCTATAGACCCCTATAGAAATTGATACCCCTGTTGTGAGTGGAGGCCGCAATACCAATGCT  
>HPV38\_Beta\_1020234\_nt3858\_AOS|1  
CATCAAATGATCGCATAGGGCGCTCACGAATGCTTCTAGCTTTTTATTTCAGAATCACAAA  
>HPV38\_Beta\_1020234\_nt185\_AOS|1  
CTTGGGATGTATTCATGGAACCTACAAAACCTCAAACGTGTCAGCAGCTCAGTGATAAGT  
>HPV44\_Alpha\_1020242\_nt6716\_AOS|2  
GCTGCCACTACACAGTCCCCTCCGTCTACATATACTAGTGAACAATATAAGCAATACATG  
>HPV55\_Alpha\_1020266\_nt6494\_AOS|1  
ATTCCACAGGATTTGGTTTTTAAAGGTGCTACTAAAAGTACAGTTCCTAATGCCATATAC  
>HPV55\_Alpha\_1020266\_nt6483\_AOS|3  
TTGGAGAGGACATTCACAGGATTTGGTTTTTAAAGGTGCTACTAAAAGTACAGTTCCTA  
>HPV55\_Alpha\_1020266\_nt6474\_AOS|1  
CGGGAACGGTTGGAGAGGACATTCCACAGGATTTGGTTTTTAAAGGTGCTACTAAAAGTA  
>HPV66\_Alpha\_1020290\_nt7066\_AOS|2  
CCCCTAGACCCAAGGCTAGTGTATCTGCCTCTAAAAGGCGGGCGGCTCCTACCTCTTCCT  
>HPV66\_Alpha\_1020290\_nt7410\_AOS|1  
AGGTTGTTTGTATGCACTATAGTAACACACCAAACCTCCATTTTAGTGCTGTACGCCATTT  
>HPV66\_Alpha\_1020290\_nt7059\_AOS|1  
CCTAGACCCCTAGACCCAAGGCTAGTGTATCTGCCTCTAAAAGGCGGGCGGCTCCTACC  
>HPV66\_Alpha\_1020290\_nt7052\_AOS|1  
ACTAGGCCCTAGACCCCTAGACCCAAGGCTAGTGTATCTGCCTCTAAAAGGCGGGCGGC  
>HPV66\_Alpha\_1020290\_nt6681\_AOS|2  
GCTAAAAGCACATTAACTAAATATGATGCCCGTGAAATCAATCAATACCTTCGCCATGTG  
>HPV66\_Alpha\_1020290\_nt6179\_AOS|1  
AGGTAATACAGGGGATTGTCCACCTCTTGCATTAGTTAATACCCCGATAGAGGACGGTGA  
>HPV66\_Alpha\_1020290\_nt6171\_AOS|2  
TCTACACCAGGTAATACAGGGGATTGTCCACCTCTTGCATTAGTTAATACCCCGATAGAG  
>HPV66\_Alpha\_1020290\_nt249\_AOS|1  
GTATTGAGTTAAACTAGTATATAGAAACAATTGGCCATATGCAGTATGTAGGGTATGTT  
>HPV103\_Unclassified\_109390382\_nt6816\_AOS|1  
TACTTTGCAAGTTTCAACAACAAGATTACTCAGCCTTCCAGCAACCGAATTAGTTATCTG  
>HPV103\_Unclassified\_109390382\_nt6476\_AOS|1  
TAGACGGGGGGTTTAATCTATGGCATTACCTGTGTTGCACATGCACTTTATATTTTTGTT  
>HPV103\_Unclassified\_109390382\_nt6190\_AOS|1  
GGTTTGTACCACCGCTCCTTCTTCTATTGGAGATACATACAGATTTTAAACATCTTTAG  
>HPV103\_Unclassified\_109390382\_nt5349\_AOS|3  
TATGTTAAAAACAGGAAAGGAAAACAGACAAAGTGTCTCTATGGACCCAAAGCAAACCTCAG  
>HPV103\_Unclassified\_109390382\_nt5338\_AOS|1  
ATCCTAATAGTTATGTTAAACAGGAAAGGAAAACAGACAAAGTGTCTCTATGGACCCAA  
>HPV103\_Unclassified\_109390382\_nt4028\_AOS|1  
AATATTGGGGAATCTATACCATTAGAAACATTTGTGGAACACAGGGGTCTGCCACATTT  
>HPV103\_Unclassified\_109390382\_nt4002\_AOS|1  
GTGCTGTAACAGAAGGATCTGTTGTCAATATTGGGGAATCTATACCATTAGAAACATTTG  
>HPV103\_Unclassified\_109390382\_nt3992\_AOS|1  
TTTATAGGGGGTGCTGTAACAGAAGGATCTGTTGTCAATATTGGGGAATCTATACCATTA  
>HPV103\_Unclassified\_109390382\_nt3346\_AOS|1  
AATAGCTTACATGGATGTACAACCGAAAAAGCGACAAAAACGGGATACTGTGGAAAATAT  
>HPV103\_Unclassified\_109390382\_nt3254\_AOS|1  
GATTCATTTTAAGCCAATAATGCTGCCAATGGTCCCCTGTATATTATCCTAACCCCTTACA  
>HPV101\_Unclassified\_109390389\_nt6831\_AOS|1  
CTGCCAATTTTGCCAGCAGGTATGTTTCATGTTTAAACAAATGTATTACTCATGTGTTTTG  
>HPV101\_Unclassified\_109390389\_nt6652\_AOS|1  
TATGTAGCATGTCAACATTGTCGTTGTATGAGTTATTTCTTCTGACTCAGGGCAGTATTT

>HPV101\_Unclassified\_109390389\_nt4092\_AOS|1  
GGTTATTAGTATAGGTGAATCTATACCTTTAGACACATTTGTTGAAACAGGAGGGTCTTC  
>HPV101\_Unclassified\_109390389\_nt3337\_AOS|1  
TTGTAAATAGCATCACATCTGCCTCTTGTGATTTTGTGTACCTTGTATATTATACTTCTT  
>HPV101\_Unclassified\_109390389\_nt3330\_AOS|1  
TGCCTATTTGTAAATAGCATCACATCTGCCTCTTGTGATTTTGTGTACCTTGTATATTAT  
>HPV101\_Unclassified\_109390389\_nt3225\_AOS|1  
ATAATAGCCAACGGGAAAGGTTTTTACATACTGTGAAGTTACCAAAGGGTACACAGTTTT  
>HPV101\_Unclassified\_109390389\_nt3218\_AOS|1  
TTTAGAAAATAATAGCCAACGGGAAAGGTTTTTACATACTGTGAAGTTACCAAAGGGTACA  
>HPV101\_Unclassified\_109390389\_nt2669\_AOS|1  
GATGCAGCAAAATGAATGGCAAGTACGAACTGAAAGTGAAATAATATCTAATTCTGTTACC  
>HPV101\_Unclassified\_109390389\_nt980\_AOS|2  
TACTGGAGGCAGCAAAAACATTACTGCAACCACATTGTGAATACCTGCAAAATTATAAATC  
>HPV101\_Unclassified\_109390389\_nt903\_AOS|1  
ATTAACAAGACCATTTCATAAGTAATAAAAGCTGTTGCTGCAGTTGGATAGCGGGGATATT  
>HPV70\_Alpha\_1173493\_nt7811\_AOS|1  
ATGTGTGCTTTGGTGCAAGTTATATTTTGTGACTAATATTTTTTACAGACCTGTGTGCAAC  
>HPV70\_Alpha\_1173493\_nt5310\_AOS|1  
CTACAGGACCTAGGTCCCATCTTTCATTTCTTCTATACCTTCTACAGTGTCTACAAAAT  
>HPV70\_Alpha\_1173493\_nt5272\_AOS|1  
AGATAATGCAATGTTACATACTACTTCTCATACAGGTTCTACAGGACCTAGGTCCCATCT  
>HPV70\_Alpha\_1173493\_nt1486\_AOS|1  
AAGATCCACAGTCACCTACTGCACAGCTAAAAACAGTATTACAGGCTAATAACCAAAAAG  
>HPV70\_Alpha\_1173493\_nt1479\_AOS|1  
GAGAATCAAGATCCACAGTCACCTACTGCACAGCTAAAAACAGTATTACAGGCTAATAAC  
>HPV70\_Alpha\_1173493\_nt1471\_AOS|1  
TTGATAGTGAGAATCAAGATCCACAGTCACCTACTGCACAGCTAAAAACAGTATTACAGG  
>HPV70\_Alpha\_1173493\_nt1267\_AOS|1  
AAGAGCTCCCGGTAAACATATGCAATAAACAGGCAAGAACAAACGTGTATTTCAGTACCAG  
>HPV70\_Alpha\_1173493\_nt1260\_AOS|2  
ACACTACAAGAGCTCCCGGTAAACATATGCAATAAACAGGCAAGAACAAACGTGTATTCA  
>HPV70\_Alpha\_1173493\_nt1247\_AOS|1  
GGAACAAAGGGTAACACTACAAGAGCTCCCGGTAAACATATGCAATAAACAGGCAAGAAC  
>HPV70\_Alpha\_1173493\_nt1237\_AOS|1  
GCGTACATAGGGAACAAAGGGTAACACTACAAGAGCTCCCGGTAAACATATGCAATAAAC  
>HPV71\_Alpha\_12084981\_nt7864\_AOS|1  
AATACCCATTGTTTGGGGCATATAGTTGTGCTGACTATGTTTCGCCTAAGTACGTTTTTGG  
>HPV71\_Alpha\_12084981\_nt7842\_AOS|1  
ATACATGTGTTACTCACCGTGCAATACCCATTGTTTGGGGCATATAGTTGTGCTGACTAT  
>HPV71\_Alpha\_12084981\_nt6548\_AOS|1  
CAGAGCCATTGGTGATCGCATGTTTTCTTGCGCCGAGAGCAATGTTTAAAGACATTTTA  
>HPV71\_Alpha\_12084981\_nt5507\_AOS|1  
ATTATTCCAATGATACTGTCATTCAACCTACTTCTGTGTCCAGCAGGCCTACACCTACTA  
>HPV71\_Alpha\_12084981\_nt4272\_AOS|1  
TTTAGTGTGTTGGTGTGCTTATGTTGCTTCTGTTTTTGTACGGTTGATGCAGTAGGTACC  
>HPV71\_Alpha\_12084981\_nt4035\_AOS|1  
TTTTTGTACTGTGTTTCTTGGGTTTCTAGCACTATATATACAGGCAGCAGCGTCCCTTA  
>HPV71\_Alpha\_12084981\_nt4028\_AOS|1  
TTAATTTTTTTTGTACTGTGTTTCTTGGGTTTCTAGCACTATATATACAGGCAGCAGCG  
>HPV71\_Alpha\_12084981\_nt3186\_AOS|1  
TTACACGATGGGATACGTGTAGACTGTGTATTATTCTCCAAGGAAGCAGTAATATATGGG  
>HPV107\_Beta\_126131393\_nt7432\_AOS|1  
ATTATATATCGCTGTGCGGTGCCAAACAAGACAAAGACTTGGCTGGATCTCGAGGAAACAC  
>HPV107\_Beta\_126131393\_nt6610\_AOS|1

CAACTAATCAAGATCACAAATACTATATAGCACCTAAGAGTGGACAATCCCAAAGTCCTT  
>HPV107\_Beta\_126131393\_nt5546\_AOS|1  
CTACCACTTCTGTCACTGTACCCAGATTTAGTTCTCCAAGGGAACTACTTTATATGTGC  
>HPV107\_Beta\_126131393\_nt5407\_AOS|1  
AGTACACTGGTGGATATTAATGTAAGGGATCTCCAGAATTGCTTGAAAGTTCTGAATTT  
>HPV107\_Beta\_126131393\_nt3976\_AOS|1  
AAGCACAAAGGAACTATAAGTATTTTAGTAGTACCTGGTCCTGGATAGGGGAACATAGT  
>HPV107\_Beta\_126131393\_nt3969\_AOS|1  
ACGCAAAAAGCACAAAGGAACTATAAGTATTTTAGTAGTACCTGGTCCTGGATAGGGGA  
>HPV107\_Beta\_126131393\_nt901\_AOS|1  
TCTCTACGTTTTTGCAACCCATTTTGGCATTTCGGGCATTGCAGGATCTTTTGCTTCAAGA  
>HPV107\_Beta\_126131393\_nt506\_AOS|1  
AAATCATTTTGAATTTTCAGGTTGTAGGTAAGCAGATTGAGGAGATCACTCAGCAAAGTAT  
>HPV107\_Beta\_126131393\_nt295\_AOS|1  
TGGACAGGCCAAGGACAATCGTACAGCTTACACAGCATCTTAATATACCAGTGAAGACT  
>HPV107\_Beta\_126131393\_nt288\_AOS|1  
ATGCTCATGGACAGGCCAAGGACAATCGTACAGCTTACACAGCATCTTAATATACCAGTG  
>HPV84\_Alpha\_12958167\_nt7808\_AOS|1  
CCCGTTTCGGTTGCTATGTTATTCATATTTTCTTATACTTTACAACAATGATACAGT  
>HPV84\_Alpha\_12958167\_nt4166\_AOS|1  
TTAATTGTTATTATTTTACTTTGGCTGTGCCACCGTGTTATGCAGTTTTAAAGTGCTTTT  
>HPV84\_Alpha\_12958167\_nt4151\_AOS|1  
ACTATTATTTTGCTTTTAATTGTTATTATTTTACTTTGGCTGTGCCACCGTGTTATGCAG  
>HPV84\_Alpha\_12958167\_nt3767\_AOS|1  
GTAAATGCTGTATTACTGAGCCATTTGTAACAATTGTGTATGTCTACATACCTGGCAAA  
>HPV84\_Alpha\_12958167\_nt3715\_AOS|1  
CTTGGTAGTATGTCTATGGTTATGTAAACAGTACCCATTGTATATGTATAGTGTAATGC  
>HPV84\_Alpha\_12958167\_nt3707\_AOS|1  
TAGCCACACTTGGTAGTATGTCTATGGTTATGTAAACAGTACCCATTGTATATGTATAGT  
>HPV84\_Alpha\_12958167\_nt3700\_AOS|2  
GGCATTGTAGCCACACTTGGTAGTATGTCTATGGTTATGTAAACAGTACCCATTGTATAT  
>HPV84\_Alpha\_12958167\_nt3622\_AOS|1  
AAAACATCATATGTAACACTATGGTATAAAAGTACGGACCAACGCAAACAGCTCTTGGCA  
>HPV84\_Alpha\_12958167\_nt2433\_AOS|1  
TTTAAATACTTACGCAGCCGAATGGTTATTTTCCCTTTTTTAAACAAGTGCCCACTGGAT  
>HPV84\_Alpha\_12958167\_nt2426\_AOS|1  
TGACACATTTAAATACTTACGCAGCCGAATGGTTATTTTCCCTTTTTTAAACAAGTGCCC  
>HPVcand87\_Alpha\_14475578\_nt5486\_AOS|1  
CCTACAGCATCTACAAAGGTGTGCGCCACGTCCATACTATCCTCTTCCCATTATGACAAT  
>HPVcand87\_Alpha\_14475578\_nt6572\_AOS|2  
CCCTGACACCTATTTTTTGAAGGGGGCGTCTGCGCCCTAGGGCCTCTTTAAGCAGTTA  
>HPVcand87\_Alpha\_14475578\_nt3861\_AOS|1  
ACATTGGTGTAACCTGTATGTAACCTAGCTGTATAATACATTTTGCATACCTGACATATAC  
>HPVcand87\_Alpha\_14475578\_nt3854\_AOS|1  
ACTGTATACATTGGTGTACCTGTATGTAACCTAGCTGTATAATACATTTTGCATACCTGA  
>HPVcand87\_Alpha\_14475578\_nt3845\_AOS|1  
GTGCATAATACTGTATACATTGGTGTACCTGTATGTAACCTAGCTGTATAATACATTTTG  
>HPVcand87\_Alpha\_14475578\_nt2525\_AOS|1  
AGGCAGATGACAGTTTAAAGTATTTACGGAGCAGAATGGTGGTGGTTTCCGTTTCTACACA  
>HPV72\_Alpha\_1491683\_nt7927\_AOS|1  
TTACAAACGTGTTAAACATTCTACTCCGGTCCCTATGTCTCATGGTTTTATAGT  
>HPV72\_Alpha\_1491683\_nt7920\_AOS|2  
AAGCCCTTTACAAACGTGTTAAACATTCTACTCCGGTCCCTATGTCTCATGGTT  
>HPV72\_Alpha\_1491683\_nt7261\_AOS|1  
TACCTCGACCCCCGCCCTACTAAACGTAAAAAGCGCAAAAAGTAACATGTCATACTGTT

>HPV72\_Alpha\_1491683\_nt7254\_AOS|1  
CAAGCTCTACCTCGACCCCCGCCCTACTAAACGTAAAAAGCGCAAAAAGTAACATGTCA  
>HPV72\_Alpha\_1491683\_nt6830\_AOS|1  
GCCACAGCGTCCTCTGTATCAGAATATACAGCTTCTAATTTTCGTGAGTATCTTCGCCAC  
>HPV72\_Alpha\_1491683\_nt5628\_AOS|1  
CATTGATTTGTCTTTGCTCCTGCCCCGTGTACCTACAATGCCTCTTGTACCCCTCTACGCA  
>HPV72\_Alpha\_1491683\_nt5497\_AOS|1  
CGTGCTTCTGTGTCTTCTACATCATTGCACAGCCCGTCCCTGTCTGCAGCGTCTGCTGTT  
>HPV72\_Alpha\_1491683\_nt5398\_AOS|1  
TCATCTGATACTATTGAAATGCAATCCTTGGCCTCCTCTACGCAGCCAGACATAACATAT  
>HPV72\_Alpha\_1491683\_nt4200\_AOS|2  
ACGGATGGGGGTGCATTAATTGTACTACGAGACGATAATTGTGGATTGTGGTTCTTCTTG  
>HPV72\_Alpha\_1491683\_nt128\_AOS|1  
AATATTTGGTTGCTGTGCAAGGAAATTGAGGTGGACCTAGAAGATTTACGGATTACCTGC  
>HPV73\_Alpha\_1491692\_nt7206\_AOS|1  
TTATATGTGTGTTGTGTGGGTGGTTTACTTGACTACTGTGCTTCCATTTTGTATAGTCGC  
>HPV73\_Alpha\_1491692\_nt6277\_AOS|1  
CTGGTGATACCGGTGATAAAATCCCAGATGACCTAATGATTAAAGGCACAGGCAATACTG  
>HPV73\_Alpha\_1491692\_nt4315\_AOS|1  
AGGCACACCATCTAAACCAGTTGAAATTCCATTACAACCTATACGACCATCAGTTGTTAC  
>HPV73\_Alpha\_1491692\_nt4308\_AOS|1  
TATCTACAGGCACACCATCTAAACCAGTTGAAATTCCATTACAACCTATACGACCATCAG  
>HPV73\_Alpha\_1491692\_nt4300\_AOS|2  
CGTTCCATTATCTACAGGCACACCATCTAAACCAGTTGAAATTCCATTACAACCTATACG  
>HPV73\_Alpha\_1491692\_nt1319\_AOS|1  
ACAAAATGTTAATGAAGAAGGCAACCAAATTTGTGTCGCCACGTGAAAGCAGTAGTGGGTC  
>HPV73\_Alpha\_1491692\_nt1311\_AOS|1  
GGGTGTTTACAAAATGTTAATGAAGAAGGCAACCAAATTTGTGTCGCCACGTGAAAGCAGT  
>HPV73\_Alpha\_1491692\_nt1304\_AOS|1  
AGGGGTAGGGTGTTTACAAAATGTTAATGAAGAAGGCAACCAAATTTGTGTCGCCACGTGA  
>HPV73\_Alpha\_1491692\_nt1295\_AOS|1  
ACTTGGGGCAGGGGTAGGGTGTTTACAAAATGTTAATGAAGAAGGCAACCAAATTTGTGTC  
>HPV73\_Alpha\_1491692\_nt734\_AOS|1  
CACAGTATGCCTTGCCATTGAAAGCAACAAAGCTGATTTAAGAGTGATAGAAGAGTTGCT  
>HPVcand86\_Alpha\_15741127\_nt7836\_AOS|1  
ACTCGGTCGCTGTATTATTCATAGTTCCCTTCTTTATACTTAACAACAATCATGTAGTTAA  
>HPVcand86\_Alpha\_15741127\_nt6700\_AOS|2  
TAGTGCCGCTACCCAGAAGGCCTCTGAATATGACCCCTCTAAGTTTAAATGAATATCTAAG  
>HPVcand86\_Alpha\_15741127\_nt5377\_AOS|1  
TCCACCACGCTGTATCCTCTGCTACAGTGTCCGCCACATCTATGGTATCTTCCACATAT  
>HPVcand86\_Alpha\_15741127\_nt5368\_AOS|1  
TCATTGCATTCCACCACGCCTGTATCCTCTGCTACAGTGTCCGCCACATCTATGGTATCT  
>HPVcand86\_Alpha\_15741127\_nt5344\_AOS|1  
ATATTACAGGAGCCTTCCGTTCCCTCATTGCATTCCACCACGCCTGTATCCTCTGCTACA  
>HPVcand86\_Alpha\_15741127\_nt5337\_AOS|1  
ATCCTCTATATTACAGGAGCCTTCCGTTCCCTCATTGCATTCCACCACGCCTGTATCCTC  
>HPVcand86\_Alpha\_15741127\_nt5329\_AOS|1  
ACACACCTATCCTCTATATTACAGGAGCCTTCCGTTCCCTCATTGCATTCCACCACGCCT  
>HPVcand86\_Alpha\_15741127\_nt5322\_AOS|1  
AGATGATACACACCTATCCTCTATATTACAGGAGCCTTCCGTTCCCTCATTGCATTCCAC  
>HPVcand86\_Alpha\_15741127\_nt1560\_AOS|2  
AGCAGAGAAAACCGTAGCAAAGTGCCTAGGAACCATACTAAATATTCCAGAAAAGCGTATG  
>HPV88\_Gamma\_167600365\_nt6130\_AOS|1  
AGAGGGAAATAAATACTTATTGCCACCTACAAATGCTGTGAATTTTAAAAATGGGATCTCA  
>HPV88\_Gamma\_167600365\_nt5089\_AOS|1

CCTGGCGCAGCAATAAAAGCTTTTGTAGATGATTATGCAGATATTATAGTTTCATATCCT  
>HPV88\_Gamma\_167600365\_nt5024\_AOS|1  
GTAATAGTCACTTATTTGTGCATTTTGAGGAAGAGGATGAACTTATATCTGTTCTACTC  
>HPV88\_Gamma\_167600365\_nt4847\_AOS|1  
TTAGTGCAATTGAACCTATAGAGCCTGATGTTATTGAGCTTTCTAATTTAGGGGAGTTTA  
>HPV88\_Gamma\_167600365\_nt4540\_AOS|2  
TATAATCGTTACATTCAACAAATCAGAACAGACAATGTTGACTTTTTTAACCCGGCCTTCA  
>HPV88\_Gamma\_167600365\_nt4533\_AOS|1  
AAGCTTATATAATCGTTACATTCAACAAATCAGAACAGACAATGTTGACTTTTTTAACCCG  
>HPV88\_Gamma\_167600365\_nt4526\_AOS|1  
GGGCCAGAAGCTTATATAATCGTTACATTCAACAAATCAGAACAGACAATGTTGACTTTT  
>HPV88\_Gamma\_167600365\_nt3715\_AOS|1  
CCTTGATTCATTGTAACCTATGTATAAAACCAGAAAGTAAACGTGACACTGCTGAGAATTTG  
>HPV88\_Gamma\_167600365\_nt3683\_AOS|1  
TTGCCAAAGGGTACAACCTACGCATTTGGTTACCTTGATTCATTGTAACCTATGTATAAAA  
>HPV88\_Gamma\_167600365\_nt2902\_AOS|1  
GTACTTTGATAATGATCGAGAAAACAGCTTCCCTACACACAATGGGAACATATTTATTA  
>HPV110\_Beta\_186461194\_nt5522\_AOS|1  
ATCTAGAGACAACACTGAAATTATACTCCCACTACCTGATACTCCAACGTGGTGCATACA  
>HPV110\_Beta\_186461194\_nt5286\_AOS|1  
GACGAGCCAGATCCTTTAAATGTTGGGCAGTTTGAATCAATGGAAATAGAAGAACCAGAT  
>HPV110\_Beta\_186461194\_nt5279\_AOS|1  
TAATATAGACGAGCCAGATCCTTTAAATGTTGGGCAGTTTGAATCAATGGAAATAGAAGA  
>HPV110\_Beta\_186461194\_nt760\_AOS|2  
GCGACTTCGGCTTTTTTGTGCTTGCAACAGTTTTTGGGAATTCGTACTCAGCAAGAAATTTT  
>HPV110\_Beta\_186461194\_nt495\_AOS|1  
GATCTAATAGAGAAGCTAGAAGTTTGTGTAAGCATCAGCAATTTTCATAGGGTAAGAGGC  
>HPV110\_Beta\_186461194\_nt413\_AOS|1  
AAATGGACGTGAAATAGAAATAGTAGAGCAAAAAGGAATTGGGGAAGTGGTTGTGCGTTG  
>HPV110\_Beta\_186461194\_nt406\_AOS|1  
ATTCTGTAAATGGACGTGAAATAGAAATAGTAGAGCAAAAAGGAATTGGGGAAGTGGTTG  
>HPV110\_Beta\_186461194\_nt399\_AOS|1  
TATGAACATTCTGTAAATGGACGTGAAATAGAAATAGTAGAGCAAAAAGGAATTGGGGAA  
>HPV110\_Beta\_186461194\_nt389\_AOS|1  
TACAAGGTTTTATGAACATTCTGTAAATGGACGTGAAATAGAAATAGTAGAGCAAAAAGG  
>HPV110\_Beta\_186461194\_nt198\_AOS|1  
CAACAGCTTGCAGATACATTATGCATTCTGTTTTAGACATATTAATACCGTGTAGATTT  
>HPV111\_Beta\_186461202\_nt5484\_AOS|1  
AATATTATTTTTTCTCATCCAGAAGCTCCCACAGTTGTGATTCACATATCAGATACTTCT  
>HPV111\_Beta\_186461202\_nt5258\_AOS|1  
CAGACCGGAAACCCCTCCATTAGAAGATGAAATAGATTTTAATTCAGAAGATTTGTTATT  
>HPV111\_Beta\_186461202\_nt2691\_AOS|1  
TCAGATTGAACATTGGCAAGCATTGAGACAAGAGCAAGTTTTATTGTACTTTGCTCGAAA  
>HPV111\_Beta\_186461202\_nt1951\_AOS|1  
TTATATTCGAGGGGAGATGCGAGAGATGAGTATGTCAACTTGGATTCACAAACAATTATT  
>HPV111\_Beta\_186461202\_nt1589\_AOS|1  
CGATTATTAAGCACAAATATTACAAGTATCAGAAGTGCAGGTATTGGCAGATCCTCCTAAA  
>HPV111\_Beta\_186461202\_nt487\_AOS|1  
AGAGAAGCTAGGAGTGTGCTACAAACAACAATATTTTCATAGAGTTAGGGATAATTGGAA  
>HPV111\_Beta\_186461202\_nt480\_AOS|2  
ATCTGGTAGAGAAGCTAGGAGTGTGCTACAAACAACAATATTTTCATAGAGTTAGGGATA  
>HPV111\_Beta\_186461202\_nt399\_AOS|1  
TAGGAAAACAGATAGAACTGTAGCAAAACAGCCTATTGGAAATATTACTGTTAGGTGTC  
>HPVFA75/KI88-03\_Unclassified\_206902429\_nt7261\_AOS|1  
TATAATCTGCTTATAAATCGCAGCCGGTACTTCACCTTACAAAGACTTGGCAGTCTGTCT



>HPVFA75/KI88-03\_Unclassified\_206902429\_nt5141\_AOS|1  
TACAGGGACCTTAGTACAATTAACACTGAGGAGCCCATAGAATTACAACCTTTAGGAGAA  
>HPVFA75/KI88-03\_Unclassified\_206902429\_nt3791\_AOS|1  
TAAAGGCATAAGGGTGGCTACAAATATGTCAGTAGTACTTGGTCATGGATCACAGAACA  
>HPVFA75/KI88-03\_Unclassified\_206902429\_nt3784\_AOS|1  
GGGTGCATAAAAGGCATAAGGGTGGCTACAAATATGTCAGTAGTACTTGGTCATGGATCA  
>HPVFA75/KI88-03\_Unclassified\_206902429\_nt1776\_AOS|1  
AAACTATGATTAGCCATCAATCTTTGGAGGCCACGCAATTTTCTTTATCTGACATGATAC  
>HPVFA75/KI88-03\_Unclassified\_206902429\_nt1644\_AOS|1  
AAGTAAATGAAATTCAAACATTGTCTGAACCACCTAAGTGGCGTAGTGTAATAGCGGCAT  
>HPVFA75/KI88-03\_Unclassified\_206902429\_nt1626\_AOS|1  
TACTATCTTCTATTTTGCAAGTAAATGAAATTCAAACATTGTCTGAACCACCTAAGTGGC  
>HPVFA75/KI88-03\_Unclassified\_206902429\_nt129\_AOS|1  
TTACTTGAAGAATATTAGAGACACATATACTGATGGAGAGGCCTAGAACAGTACAAGTTC  
>HPVFA75/KI88-03\_Unclassified\_206902429\_nt122\_AOS|1  
TATAAAATTACTTGAAGAATATTAGAGACACATATACTGATGGAGAGGCCTAGAACAGTA  
>HPV91\_Alpha\_22023568\_nt7701\_AOS|1  
GATTTTCGGTCGTGTTTGGCAACGTAGGTATTGTGTCAGCATAATTGCAAGGTTACATTGA  
>HPV91\_Alpha\_22023568\_nt7596\_AOS|1  
TTTGTGTTATGAATGTCCAGCGTTGGGGCAGCGTTGGGGTTTAGGTCTGGTGGTAGTCAT  
>HPV91\_Alpha\_22023568\_nt7586\_AOS|1  
TCTTTCTGTGTTTGTGTTATGAATGTCCAGCGTTGGGGCAGCGTTGGGGTTTAGGTCTGG  
>HPV91\_Alpha\_22023568\_nt7579\_AOS|1  
ATGTGTTTCTTCTGTTTGTGTTATGAATGTCCAGCGTTGGGGCAGCGTTGGGGTTTA  
>HPV91\_Alpha\_22023568\_nt5992\_AOS|2  
ACTGGCTGTGGGCCACCCTTTTTTCTTATATAAAAAATAATTCTGGTAAAGTAATTGTTCC  
>HPV91\_Alpha\_22023568\_nt3950\_AOS|1  
CCTTGATATATTGCTTGTATAGTGGAACCTGTTACTGTGACGTTAAGGGTGTGTAACACTC  
>HPV91\_Alpha\_22023568\_nt3605\_AOS|1  
AGTAGAGACCCACGAATCATCCCTAAGCATTCGAACCACAACCAAGGAGGGCACAGTGGT  
>HPV91\_Alpha\_22023568\_nt3595\_AOS|1  
GCCATTGGACAGTAGAGACCCACGAATCATCCCTAAGCATTCGAACCACAACCAAGGAGG  
>HPV91\_Alpha\_22023568\_nt3588\_AOS|1  
GAGGAGAGCCATTGGACAGTAGAGACCCACGAATCATCCCTAAGCATTCGAACCACAACC  
>HPV91\_Alpha\_22023568\_nt3581\_AOS|1  
ACTGTTGGAGGAGAGCCATTGGACAGTAGAGACCCACGAATCATCCCTAAGCATTCGAAC  
>HPVcand89\_Alpha\_22095322\_nt7658\_AOS|1  
CACTTTACACAAAGACTTGTAATCTTTTATACTTCCTGCGTAGGCGGCTACATGTTCCAC  
>HPVcand89\_Alpha\_22095322\_nt7642\_AOS|1  
TGTTATGGCGCCATGCCACTTTACACAAAGACTTGTAATCTTTTATACTTCCTGCGTAGG  
>HPVcand89\_Alpha\_22095322\_nt7555\_AOS|1  
ATGAGATATGTATTCGGCCATTTCCCTTTCCACCCAGCGTCCATTTTGAGTTCAGCGACC  
>HPVcand89\_Alpha\_22095322\_nt7547\_AOS|1  
TGCGCCCTATGAGATATGTATTCGGCCATTTCCCTTTCCACCCAGCGTCCATTTTGAGTT  
>HPVcand89\_Alpha\_22095322\_nt6560\_AOS|3  
GGACCTGCCAAAAACCTTGTATATGCCTGGGTCTGCTGCTAATAACAGAAATACACTTAC  
>HPVcand89\_Alpha\_22095322\_nt5480\_AOS|2  
ATACCACCTTTTCTGGCCCGACCGTTACTGCTACATCTGCTGTATCGTCTCAATACACAA  
>HPVcand89\_Alpha\_22095322\_nt4329\_AOS|1  
ATACAATAAATACATTGTTGCAATGACCCACCCTGTGCGGCGTCGTAAACGGGCTTCGGT  
>HPVcand89\_Alpha\_22095322\_nt307\_AOS|1  
TATGCTGTAAGCCGTTAGGCAGCCAGGAAAAAGGACTATATGGTGTATTTTAACGAGCGAT  
>HPVcand89\_Alpha\_22095322\_nt62\_AOS|1  
AGAGGATCTACGGCTTACATGCATATATTGCACCAAGGAGCTTACAACATCAGAAGTGCT  
>HPVcand89\_Alpha\_22095322\_nt55\_AOS|1

TGGATTTAGAGGATCTACGGCTTACATGCATATATTGCACCAAGGAGCTTACAACATCAG  
>HPV90\_Alpha\_22138122\_nt7261\_AOS|1  
CCCTCTACCGCCCCCTCTACAAAACGTAAACGGTCCAAACGTTCCCTAAGCATGTTATGTG  
>HPV90\_Alpha\_22138122\_nt7254\_AOS|1  
TCCCGCACCTCTACCGCCCCCTCTACAAAACGTAAACGGTCCAAACGTTCCCTAAGCATG  
>HPV90\_Alpha\_22138122\_nt6603\_AOS|1  
AATTCCCGATGGCTTTGTGCTAAAAGGAACATCTTCTACCTCTCGTGGCACTCCTACAAG  
>HPV90\_Alpha\_22138122\_nt6596\_AOS|1  
GCGACGCAATTCCCGATGGCTTTGTGCTAAAAGGAACATCTTCTACCTCTCGTGGCACTC  
>HPV90\_Alpha\_22138122\_nt5543\_AOS|1  
GACTGCATCGTCTGCCCTATCATCTGCAGCATCCAATACCACTGTGCCTCTATCTACAGG  
>HPV90\_Alpha\_22138122\_nt3920\_AOS|1  
TATTGTATTCCCTTACTGTGTTTCTAGGCCTCCTGATCATATACATACAGGCGTTGCAGTC  
>HPV90\_Alpha\_22138122\_nt3679\_AOS|1  
CTTCCTATCAACCATAACCTTACCTAAAGACATTGAAGCAGTACTGGGGTACATGACTAT  
>HPV90\_Alpha\_22138122\_nt3671\_AOS|1  
AGGGCAACCTTCCATCAACCATAACCTTACCTAAAGACATTGAAGCAGTACTGGGGTAC  
>HPV90\_Alpha\_22138122\_nt3664\_AOS|1  
GGAACAAAGGGCAACCTTCCATCAACCATAACCTTACCTAAAGACATTGAAGCAGTACT  
>HPV90\_Alpha\_22138122\_nt1277\_AOS|1  
AATCAGGTACAGATGCTATCCTGTCTCTGCTTAAACAAGTAACCTAAGGGCCACATTAC  
>HPV58\_Alpha\_222386\_nt7059\_AOS|2  
TTAAAGCAAAGCCCAGACTAAAACGTTTCGGCCCCCTACTACCCGTGCACCATCCACCAAAC  
>HPV58\_Alpha\_222386\_nt5506\_AOS|1  
ATGTCTAGTCCATTTATTCCTATATCTCCACTAACTCCTTTTAATACCATAATTGTGGAT  
>HPV58\_Alpha\_222386\_nt5486\_AOS|1  
TTGCATCTTCTGTAACATCTATGTCTAGTCCATTTATTCCTATATCTCCACTAACTCCTT  
>HPV58\_Alpha\_222386\_nt5449\_AOS|1  
GACACTCCTCTTGTGTCAATTGGAACCTGGTCCAGACATTGCATCTTCTGTAACATCTATG  
>HPV58\_Alpha\_222386\_nt5351\_AOS|1  
CTGATACTATACATGATTTTTCAGAGTCTCTGCACTCACATACGTCCCTTGGCCACCACAC  
>HPV58\_Alpha\_222386\_nt5219\_AOS|1  
AAGACTTAAGTCCCATACAGCCTGTCCAGGAACAGGTACAACAGCAGCAACAATTTGAAT  
>HPV58\_Alpha\_222386\_nt5210\_AOS|1  
ATTACTACCAAGACTTAAGTCCCATACAGCCTGTCCAGGAACAGGTACAACAGCAGCAAC  
>HPV58\_Alpha\_222386\_nt5203\_AOS|1  
AAAGTACATTACTACCAAGACTTAAGTCCCATACAGCCTGTCCAGGAACAGGTACAACAG  
>HPV58\_Alpha\_222386\_nt3460\_AOS|2  
AGAGACAACACCCAGTACTCCACAAAGTATACAGACTGCGCCGTGGACAGTAGACCACGA  
>HPV58\_Alpha\_222386\_nt3444\_AOS|1  
CGATTTACCAGACTCCAGAGACAACACCCAGTACTCCACAAAGTATACAGACTGCGCCGT  
>HPV74\_Alpha\_27462483\_nt7051\_AOS|1  
ACAGCCCCCTCCTCAACCACTAAACAGAAACGCTCTAGGAAACGATAGCATGCTTTTGT  
>HPV74\_Alpha\_27462483\_nt7044\_AOS|1  
GGCCCCCTACAGCCCCCTCCTCAACCACTAAACAGAAACGCTCTAGGAAACGATAGCATGC  
>HPV74\_Alpha\_27462483\_nt7037\_AOS|2  
AGCGTTTCGGCCCCCTACAGCCCCCTCCTCAACCACTAAACAGAAACGCTCTAGGAAACGAT  
>HPV74\_Alpha\_27462483\_nt7030\_AOS|1  
GGTAAAAAGCGTTTCGGCCCCCTACAGCCCCCTCCTCAACCACTAAACAGAAACGCTCTAGG  
>HPV74\_Alpha\_27462483\_nt4705\_AOS|1  
CTGTTATACAGTCTCAACCCCCGTAGAGGCTGGTGGTCATGTGCTGATTTCTCTCTCTA  
>HPV74\_Alpha\_27462483\_nt4698\_AOS|1  
GACCCTTCTGTTATACAGTCTCAACCCCCGTAGAGGCTGGTGGTCATGTGCTGATTTCC  
>HPV74\_Alpha\_27462483\_nt4683\_AOS|1  
AATCCCTCGTTTACTGACCCTTCTGTTATACAGTCTCAACCCCCGTAGAGGCTGGTGGT

>HPV74\_Alpha\_27462483\_nt4142\_AOS|1  
TCAAGGGTGTAACGCCTTCTGTATGCAGTAAATAAGTGTTTTTATACATGCTGTGTATGG  
>HPV74\_Alpha\_27462483\_nt2989\_AOS|1  
TTTATATATATACTGGACGGCGACGAATGGGTAAAGGTGGAAGGACAAGTTGACTATAGG  
>HPV92\_Beta\_27531786\_nt5260\_AOS|2  
TACGTTTCGTAAATATTGATTTGGAAGAGTTACCTAATTTAGAGGAAAATGTACACCTAGA  
>HPV92\_Beta\_27531786\_nt5154\_AOS|1  
ATTTTTTTTAGGGATATTAGCAGTATTGATACTCAACCTTCTATTGAACTGCAAGTTCTTG  
>HPV92\_Beta\_27531786\_nt3875\_AOS|1  
GAATAGGACGCTCTAGAATGATTATTAGCTTTACCAGTAAATCTCAAAGACAAATGTTTT  
>HPV92\_Beta\_27531786\_nt3868\_AOS|1  
AACGATAGAATAGGACGCTCTAGAATGATTATTAGCTTTACCAGTAAATCTCAAAGACAA  
>HPV92\_Beta\_27531786\_nt3041\_AOS|1  
TTATGGATGGATTAAATAAACAATACTATATCAGATTTGCTCAAGACGCACGCAGATTTA  
>HPV92\_Beta\_27531786\_nt3033\_AOS|1  
TGCCTATTTTATGGATGGATTAAATAAACAATACTATATCAGATTTGCTCAAGACGCACG  
>HPV92\_Beta\_27531786\_nt354\_AOS|1  
ATAGAAAGGGACTCAGGTAGTCTTTTGTGTTGTTTAACTGTTAGATGTAAGTTTTGTTTA  
>HPV92\_Beta\_27531786\_nt308\_AOS|1  
AGAAACAAAACATTTTTATGAGTATAGTGTAAGGAAAGGATGCTATAGAAAGGGACTC  
>HPV75\_Beta\_2911544\_nt3900\_AOS|2  
ATCCAAACATACTAAAATGCTTTAGGTACAGAGACAAGAAAAACAGAAAGGGATTGGTTA  
>HPV75\_Beta\_2911544\_nt7200\_AOS|3  
CAAATTCCTTTTTCAGGCAGGCTTACGAAGGGCTTCCAAGGTAACCAGAACAGCCAGTGT  
>HPV75\_Beta\_2911544\_nt4776\_AOS|1  
ATTGGGGGAGTCTGCATTATCAGACCAAATCGTGGTCACCAATGGCTCTGGTGGGCAAGC  
>HPV75\_Beta\_2911544\_nt3889\_AOS|1  
TTTAAGAGGCGATCCAAACATACTAAAATGCTTTAGGTACAGAGACAAGAAAAACAGAAA  
>HPV75\_Beta\_2911544\_nt471\_AOS|1  
ACATAATCTTATTGTAAGGTGCCAGTTTTGTCTGAAACGTTTGGATATATTTGAAAACT  
>HPV75\_Beta\_2911544\_nt464\_AOS|1  
AAAGTATACATAATCTTATTGTAAGGTGCCAGTTTTGTCTGAAACGTTTGGATATATTTG  
>HPV75\_Beta\_2911544\_nt457\_AOS|1  
GCAGCAGAAAGTATACATAATCTTATTGTAAGGTGCCAGTTTTGTCTGAAACGTTTGGAT  
>HPV76\_Beta\_2911551\_nt4801\_AOS|1  
AACACTAGGGGAATCCGCATTGTCAGACCAAATTGTAGTTACCAGTGGCTCAGGTGGCCA  
>HPV76\_Beta\_2911551\_nt3933\_AOS|1  
ATGTGTTGAAATGCTTTAGATACAGAGATAAAAAAATAAGAAGGGATTAGTAAATGTT  
>HPV76\_Beta\_2911551\_nt471\_AOS|1  
AGCGAACATTATAATAAGGTGTCAATTTTGTTGAAACGCCTGGATTTATTTGAAAACT  
>HPV76\_Beta\_2911551\_nt464\_AOS|1  
AAAATATAGCGAACATTATAATAAGGTGTCAATTTTGTTGAAACGCCTGGATTTATTTG  
>HPV76\_Beta\_2911551\_nt457\_AOS|1  
GCTGCAGAAAATATAGCGAACATTATAATAAGGTGTCAATTTTGTTGAAACGCCTGGAT  
>HPV77\_Alpha\_2911558\_nt6600\_AOS|2  
TCCAGAATCTTTGTACCTCAAAGGGAGTAGCGGGCGTGAGACTCCCGGCAGTGCTATATA  
>HPV77\_Alpha\_2911558\_nt6593\_AOS|2  
ACAAAATTCCAGAATCTTTGTACCTCAAAGGGAGTAGCGGGCGTGAGACTCCCGGCAGTG  
>HPV77\_Alpha\_2911558\_nt5590\_AOS|1  
TATCTCCGGTGGATGTGCATTTACACACTGGCCCCGACATTGTTTTGCCTTCTTCTGCAC  
>HPV77\_Alpha\_2911558\_nt5583\_AOS|1  
CCATTTATATCTCCGGTGGATGTGCATTTACACACTGGCCCCGACATTGTTTTGCCTTCT  
>HPV77\_Alpha\_2911558\_nt5489\_AOS|1  
GAACAGTGGTCGAATCTTACCTCTTTTGGGGGTGCGGGTGCATCGTCCCTCCCTCCCTTC  
>HPV77\_Alpha\_2911558\_nt5482\_AOS|1

CCTTTACGAACAGTGGTCGCAATCTTACCTCTTTTGGGGGTCGCGGTGCATCGTCCTCCC  
>HPV77\_Alpha\_2911558\_nt5474\_AOS|1  
TGACGTGGCCTTTACGAACAGTGGTCGCAATCTTACCTCTTTTGGGGGTCGCGGTGCATC  
>HPV77\_Alpha\_2911558\_nt346\_AOS|1  
CTACGTGGACGGCGTGGAGGCAGAAACAAAAGAATCCATAGATACCCAGCAAATCAGATG  
>HPV77\_Alpha\_2911558\_nt327\_AOS|1  
AACACTGGGAGTATTCATACTACGTGGACGGCGTGGAGGCAGAAACAAAAGAATCCATAG  
>HPV80\_Beta\_2911565\_nt3917\_AOS|1  
GGACGTTACGGATGTTACTTGCATTTACTTCAAACACTGAGAGACAGCTTTTTATTAAAC  
>HPV80\_Beta\_2911565\_nt5460\_AOS|2  
GGTAATGCAAGGCGTAGTACTACTACATACACAGTTCCTCGATTTGAGTCTCCTAGAAAT  
>HPV80\_Beta\_2911565\_nt5453\_AOS|1  
AGTATTTGGTAATGCAAGGCGTAGTACTACTACATACACAGTTCCTCGATTTGAGTCTCC  
>HPV80\_Beta\_2911565\_nt3927\_AOS|1  
GGATGTTACTTGCATTTACTTCAAACACTGAGAGACAGCTTTTTATTAAACATAATGAAAT  
>HPV80\_Beta\_2911565\_nt1628\_AOS|1  
TATTAAGATTGCTAACTAATCTTTTGCAAGTATCAGAAGTACAAATAATAGCTGAACCGC  
>HPV80\_Beta\_2911565\_nt1489\_AOS|1  
GTGTATGCTGTACAAGACGAAGTATTAGAAAGTTCCAAACAACTTTTAATTCAGCATTGT  
>HPV80\_Beta\_2911565\_nt1482\_AOS|1  
ATTAAGTGTGTATGCTGTACAAGACGAAGTATTAGAAAGTTCCAAACAACTTTTAATTCA  
>HPV80\_Beta\_2911565\_nt448\_AOS|1  
TGGGAGATTGAGGTAGTTGAGCGAAAAGCTGTTGGAGACATTACTATTCGTTGCAAATTT  
>HPV80\_Beta\_2911565\_nt440\_AOS|2  
TGTGTGGTTGGGAGATTGAGGTAGTTGAGCGAAAAGCTGTTGGAGACATTACTATTCGTT  
>HPV80\_Beta\_2911565\_nt311\_AOS|1  
AGTTAGTAAGTTTTGATCGCAAATGTTTGCAGTTGATTTGGACTGAAGAAGACTTTGTCT  
>HPVRTRX7\_Unclassified\_30315616\_nt6990\_AOS|3  
TATATCTAGTGAAAATCAAGATATACAGCAAATACAATCATATGACTCACAAAAGTTTAG  
>HPVRTRX7\_Unclassified\_30315616\_nt5521\_AOS|1  
CGACCATCATACAAGGTACTGTGGAAAGTACGTTTCATAGACATGGATACAGCAGAAAATC  
>HPVRTRX7\_Unclassified\_30315616\_nt5122\_AOS|1  
TTGGCAGGCGTAGGGGGCCTTCTCTAACAAATAGAAGGTTAGTTCAGCAAGTACAAGTAG  
>HPVRTRX7\_Unclassified\_30315616\_nt5110\_AOS|1  
GAGCACTATCCATTGGCAGGCGTAGGGGGCCTTCTCTAACAAATAGAAGGTTAGTTCAGC  
>HPVRTRX7\_Unclassified\_30315616\_nt5095\_AOS|1  
GCACACCACTTCAAAGAGCACTATCCATTGGCAGGCGTAGGGGGCCTTCTCTAACAAATA  
>HPVRTRX7\_Unclassified\_30315616\_nt5087\_AOS|1  
GCGCAGTAGCACACCACTTCAAAGAGCACTATCCATTGGCAGGCGTAGGGGGCCTTCTCT  
>HPVRTRX7\_Unclassified\_30315616\_nt3798\_AOS|1  
AAAGAGGAAGTAGGAGCTGTAGGGGTGCGGTAGGGGAACAGGAAAGCGACGGGGTAGAT  
>HPVRTRX7\_Unclassified\_30315616\_nt3625\_AOS|1  
GAGTCGGAGGTCAGAATCCAGATCACAATCCCAGAAGTACCTCCAGCCGAAGGCAGGTCG  
>HPVRTRX7\_Unclassified\_30315616\_nt3618\_AOS|1  
AGACTAGGAGTCGGAGGTCAGAATCCAGATCACAATCCCAGAAGTACCTCCAGCCGAAGG  
>HPVRTRX7\_Unclassified\_30315616\_nt3610\_AOS|1  
GGTCTCCAAGACTAGGAGTCGGAGGTCAGAATCCAGATCACAATCCCAGAAGTACCTCCA  
>HPV65\_Gamma\_312100\_nt6175\_AOS|2  
TTCTTGCTCAAGAAGGTCAGGATCAGAATACTTTAGGTCCACATATATATATAGGCACTC  
>HPV65\_Gamma\_312100\_nt6168\_AOS|1  
TACTGGATTCTTGCTCAAGAAGGTCAGGATCAGAATACTTTAGGTCCACATATATATATA  
>HPV65\_Gamma\_312100\_nt5090\_AOS|1  
CCACTATTCCTCCTGGTTTAGGCTTGAGAATTTATGTTGATGATGTAGGCTCCGATTTAT  
>HPV65\_Gamma\_312100\_nt5079\_AOS|1  
ATTCAGTATCCCCACTATTCCTCCTGGTTTAGGCTTGAGAATTTATGTTGATGATGTAGG

>HPV65\_Gamma\_312100\_nt5072\_AOS|1  
GATCTTCATT CAGTATCCCCACTATTCTCCTGGTTTAGGCTTGAGAATTATGTTGATG  
>HPV65\_Gamma\_312100\_nt5038\_AOS|1  
AACTCTCACTTGGTTTTTA ACTAGCAGTAGACGTGGATCTTCATT CAGTATCCCCACTATT  
>HPV65\_Gamma\_312100\_nt5031\_AOS|1  
TTTTAGCAACTCTCACTTGGTTTTTA ACTAGCAGTAGACGTGGATCTTCATT CAGTATCCC  
>HPV65\_Gamma\_312100\_nt3680\_AOS|2  
AGACTCATTTGTTAAACACAATCTATTCCC AAACTCTGTACATATACCTATGGTTCCTT  
>HPV65\_Gamma\_312100\_nt350\_AOS|1  
AATTTGGAAGAAGTAGCTCAAAGGAAAATTAAGGAGATTTGCATCAGATGTATATGTTGT  
>HPV67\_Alpha\_3228267\_nt7475\_AOS|1  
TCTAGGTTTCTTGCCAACATTGTTAATCTTTGTCTTCCTGCAGTGCAATGCCTTTACTTG  
>HPV67\_Alpha\_3228267\_nt7466\_AOS|1  
TTTTGGTATTCTAGGTTTCTTGCCAACATTGTTAATCTTTGTCTTCCTGCAGTGCAATGC  
>HPV67\_Alpha\_3228267\_nt7459\_AOS|1  
CATAGGGTTTGGTATTCTAGGTTTCTTGCCAACATTGTTAATCTTTGTCTTCCTGCAGT  
>HPV67\_Alpha\_3228267\_nt5406\_AOS|1  
TAGTGGTTTTGATTTTCCATTTTCTCTACTGTACCATTACAGCCAGGTCCCGATATTGT  
>HPV67\_Alpha\_3228267\_nt5381\_AOS|1  
CCACCAATGTTACTGTCCCTTAAGTAGTGGTTTTTGATTTTCCATTTTCTCTACTGTAC  
>HPV67\_Alpha\_3228267\_nt5370\_AOS|1  
TAGTCCTCAGACCACCAATGTTACTGTCCCTTAAGTAGTGGTTTTTGATTTTCCATTTTC  
>HPV67\_Alpha\_3228267\_nt5363\_AOS|1  
CATTACATAGTCCTCAGACCACCAATGTTACTGTCCCTTAAGTAGTGGTTTTTGATTTTC  
>HPV67\_Alpha\_3228267\_nt5356\_AOS|1  
TCCTATT CATTACATAGTCCTCAGACCACCAATGTTACTGTCCCTTAAGTAGTGGTTTT  
>HPV67\_Alpha\_3228267\_nt5349\_AOS|1  
ATCAATATCCTATT CATTACATAGTCCTCAGACCACCAATGTTACTGTCCCTTAAGTAG  
>HPV67\_Alpha\_3228267\_nt5316\_AOS|1  
ATATATGGATCCTGACACACCCTTTCCACAGCCATCAATATCCTATT CATTACATAGTCC  
>HPV11\_Alpha\_333026\_nt4950\_AOS|1  
ATATCTGCCCCAACAATAACATCCCAACATGTAGAAGACATTCCACTAGACACTTTTGT  
>HPV11\_Alpha\_333026\_nt4942\_AOS|1  
ACATACTTATATCTGCCCCAACAATAACATCCCAACATGTAGAAGACATTCCACTAGACA  
>HPV11\_Alpha\_333026\_nt4934\_AOS|1  
CAGTGGTCACATACTTATATCTGCCCCAACAATAACATCCCAACATGTAGAAGACATTCC  
>HPV11\_Alpha\_333026\_nt4852\_AOS|1  
CCAATCACA CTACTACTAGTGTGTTTCAAAATCCCCTGTTTACAGAACCGTCTGTAATAC  
>HPV11\_Alpha\_333026\_nt4343\_AOS|1  
AATGGAGATTATGTGTACATGA ACTAGAGTAAACCTTTTTTATACAGTGTGTGGTGTACG  
>HPV11\_Alpha\_333026\_nt4258\_AOS|1  
ACATGGTACTGAAAAAACTAAATGTGCTAAGTGTAATCAAACCGCAATACTACTGTGGA  
>HPV11\_Alpha\_333026\_nt3126\_AOS|1  
ACATATATACCTGCAGGACAACGACTCATGGGTAAAAGTAACTAGTTCCGTAGATGCCAA  
>HPV11\_Alpha\_333026\_nt446\_AOS|1  
AAACTAAAGCACATATTGGGAAAGGCACGCTTCATAAACTAAATAACCAGTGGAAGGGT  
>HPV11\_Alpha\_333026\_nt439\_AOS|1  
AATAGAAAACTAAAGCACATATTGGGAAAGGCACGCTTCATAAACTAAATAACCAGTG  
>HPV11\_Alpha\_333026\_nt425\_AOS|1  
AAGCCGTTGTGTGAAATAGAAAACTAAAGCACATATTGGGAAAGGCACGCTTCATAAAA  
>HPV31\_Alpha\_333048\_nt7740\_AOS|2  
TTTTGTAGATTATCTATATCCTTGATTGCAGTGTGGCTTTTGCACATGTTTAACTGCC  
>HPV31\_Alpha\_333048\_nt7529\_AOS|1  
AGTTCTGCGGTTTTTGGTTTTCTGAATACTAGTTTTTGCCAACATTCTGGCTTGTAGTTT  
>HPV31\_Alpha\_333048\_nt7421\_AOS|1

TTTTTGCAACTAAAGCTACTCCATTTTGATTTTATGCAGCCATTTTAAATCCCTAACCGT  
>HPV31\_Alpha\_333048\_nt7414\_AOS|1  
GGTCCGTTTTTTGCAACTAAAGCTACTCCATTTTGATTTTATGCAGCCATTTTAAATCCC  
>HPV31\_Alpha\_333048\_nt7407\_AOS|1  
TACACCCGGTCCGTTTTTTGCAACTAAAGCTACTCCATTTTGATTTTATGCAGCCATTTT  
>HPV31\_Alpha\_333048\_nt7400\_AOS|1  
AAAGTTGTACACCCGGTCCGTTTTTTGCAACTAAAGCTACTCCATTTTGATTTTATGCAG  
>HPV31\_Alpha\_333048\_nt7330\_AOS|1  
TACTTGTTCCCTGCTCCTCCCAATAGTCATGTACTTATTTCTGCCTATAATTTAGGTGTCA  
>HPV31\_Alpha\_333048\_nt7322\_AOS|1  
CTTGTTCCCTACTTGTTCCCTGCTCCTCCCAATAGTCATGTACTTATTTCTGCCTATAATTT  
>HPV31\_Alpha\_333048\_nt7309\_AOS|1  
ACTATTGTTCCCTACTTGTTCCCTACTTGTTCCCTGCTCCTCCCAATAGTCATGTACTTATTT  
>HPV31\_Alpha\_333048\_nt7299\_AOS|1  
TATTTTATAAACTATTGTTCCCTACTTGTTCCCTACTTGTTCCCTGCTCCTCCCAATAGTCAT  
>HPV33\_Alpha\_333049\_nt5467\_AOS|1  
CATTTGTTCCCTATTTTCGCCTTTTTTTCCTTTTGACACCATTGTTGTAGACGGTGCTGACT  
>HPV33\_Alpha\_333049\_nt5459\_AOS|1  
ATCTAGCCCATTGTTCCCTATTTTCGCCTTTTTTTCCTTTTGACACCATTGTTGTAGACGG  
>HPV33\_Alpha\_333049\_nt3904\_AOS|1  
TTATTACGTCCTTTAATACTTTCCATTCTACCTATGCTTGGTTGCTGGTGTGGTATTG  
>HPV33\_Alpha\_333049\_nt3891\_AOS|1  
ATGCTTATCCTTATTATTACGTCCTTTAATACTTTCCATTCTACCTATGCTTGGTTGCT  
>HPV33\_Alpha\_333049\_nt1391\_AOS|1  
TGTGAGACAAATGTAGATAGCTGTGAAAATGTTACGTTGCAGGAAATTAGTAATGTTCTA  
>HPV33\_Alpha\_333049\_nt1384\_AOS|1  
AGTAAGCTGTGAGACAAATGTAGATAGCTGTGAAAATGTTACGTTGCAGGAAATTAGTAA  
>HPV33\_Alpha\_333049\_nt1377\_AOS|1  
ATTCAGAAGTAAGCTGTGAGACAAATGTAGATAGCTGTGAAAATGTTACGTTGCAGGAAA  
>HPV33\_Alpha\_333049\_nt1370\_AOS|1  
GGGGATGATTGAGAAAGTAAGCTGTGAGACAAATGTAGATAGCTGTGAAAATGTTACGTTG  
>HPV33\_Alpha\_333049\_nt170\_AOS|1  
AACTATACACAACATTGAACTACAGTGCGTGGAATGCAAAAAACCTTTGCAACGATCTGA  
>HPV33\_Alpha\_333049\_nt160\_AOS|2  
CATTTGGAGACAACATATACACAACATTGAACTACAGTGCGTGGAATGCAAAAAACCTTTGC  
>HPV35\_Alpha\_333050\_nt7790\_AOS|1  
TGTCCAACCGATTTGGATTACAGTTTTATAAGCATTTCTTTTTATTATAGTTAGTAACAA  
>HPV35\_Alpha\_333050\_nt7782\_AOS|1  
CACAGGTGTGTCCAACCGATTTGGATTACAGTTTTATAAGCATTTCTTTTTATTATAGTT  
>HPV35\_Alpha\_333050\_nt7544\_AOS|1  
TAAACTTGATTCATCTTGAGTATTAGTCATTTTTCATACTTGTGGTCCACCCACACTTG  
>HPV35\_Alpha\_333050\_nt5390\_AOS|1  
ATGATATTCCCTATAACAGCAGGGCCAGACATTGTATTTAACTCTAATACTATTACTAACT  
>HPV35\_Alpha\_333050\_nt5379\_AOS|1  
AAGTAGTGGCTATGATATTCCCTATAACAGCAGGGCCAGACATTGTATTTAACTCTAATAC  
>HPV35\_Alpha\_333050\_nt5362\_AOS|1  
AATACTACTATACCATTAAAGTAGTGGCTATGATATTCCCTATAACAGCAGGGCCAGACATT  
>HPV35\_Alpha\_333050\_nt5168\_AOS|1  
GTATTACTGAAGATATAGAATTACAACCTTACAACATGTACCATCCTCTTTACCACATA  
>HPV35\_Alpha\_333050\_nt3942\_AOS|1  
ACTGTAGCAACCACTACTTGCTTTTGTTGTTTCTTGCTTTTGTATATACCTATGGATG  
>HPV47\_Beta\_333062\_nt7658\_AOS|1  
TTGTTATCGTTTTTGGCGATCACATTTGGCACCGCGGGCAGCTGTTTTGGCACTACAAGA  
>HPV47\_Beta\_333062\_nt7644\_AOS|1  
AAAGAAATTTAATCTTGTTATCGTTTTTGGCGATCACATTTGGCACCGCGGGCAGCTGTT

>HPV47\_Beta\_333062\_nt6964\_AOS|1  
TCTGTTTACTCTCAGGCAGGGGACATAAAGGATATACAGGATTATAATGCAGACAATTTT  
>HPV47\_Beta\_333062\_nt6954\_AOS|1  
TTTCAGCATCTCTGTTTACTCTCAGGCAGGGGACATAAAGGATATACAGGATTATAATGC  
>HPV47\_Beta\_333062\_nt6944\_AOS|1  
GAAATACAAATTTTCAGCATCTCTGTTTACTCTCAGGCAGGGGACATAAAGGATATACAGG  
>HPV47\_Beta\_333062\_nt5758\_AOS|1  
CGGGACACTATTGATATTATTTACCCTACACCTGAATTACCTGTAGTTGTCATTTCACACC  
>HPV47\_Beta\_333062\_nt5540\_AOS|2  
ATATGGACATTGCTGAAAACCTTTTATCTGAAACAATAGATGCTTCATCTAATGATTTAC  
>HPV47\_Beta\_333062\_nt4972\_AOS|1  
GGACAAAGGATAGGCGGTGATATAACAGACGAAATTGAACTTACTGAGTTTCCAAGCAGA  
>HPV47\_Beta\_333062\_nt2934\_AOS|1  
GAGGCTATATATATGGTGTGTCAGTTAGAGTCGCTACAAAAATCAGCGTTTGCTTTGGAG  
>HPV47\_Beta\_333062\_nt2925\_AOS|1  
AGGGCCAAAGAGGCTATATATATGGTGTGTCAGTTAGAGTCGCTACAAAAATCAGCGTTT  
>HPV8\_Beta\_333074\_nt6929\_AOS|1  
AAATGGGGAACCTTAAGAACATCACAGACTATAAATCAACCCAGTTCAGAGAATATCTGAG  
>HPV8\_Beta\_333074\_nt6913\_AOS|2  
TTTCAGTTTACACTGAAAATGGGGAACCTTAAGAACATCACAGACTATAAATCAACCCAGT  
>HPV8\_Beta\_333074\_nt5718\_AOS|1  
AAATAATTTACCCTACACCTGATCTTCCGGTGGTAATAATCCACACACATGATAACAGTG  
>HPV8\_Beta\_333074\_nt5711\_AOS|1  
AATGAGGAAATAATTTACCCTACACCTGATCTTCCGGTGGTAATAATCCACACACATGAT  
>HPV8\_Beta\_333074\_nt5701\_AOS|1  
AAGTCGCAATAATGAGGAAATAATTTACCCTACACCTGATCTTCCGGTGGTAATAATCCA  
>HPV8\_Beta\_333074\_nt4842\_AOS|1  
AAATCATAACTGATTCCACACCTACACAAGGAGAAAGTTCTCTAGCAGACCACATTTTAG  
>HPV8\_Beta\_333074\_nt514\_AOS|1  
AGATAGACGTTAGGTGTCAAACTGCTTGTTCATTTTTTGGATATCATAGAGAAATTAGATT  
>HPV8\_Beta\_333074\_nt350\_AOS|1  
TGAGTTTGACAAAAAGAGACTGTGCCTAATTTGGAAAAATTACGTTGTTACTGCGTGTTG  
>HPV8\_Beta\_333074\_nt336\_AOS|1  
TTCTTAGAACTGTGTGAGTTTGACAAAAAGAGACTGTGCCTAATTTGGAAAAATTACGTT  
>HPV8\_Beta\_333074\_nt149\_AOS|1  
ATATATATTGTTACAATGCTGTGACTTGTGCAATTTTCCTAAGCAAATGGACGGGCAGGA  
>HPV51\_Alpha\_333087\_nt6553\_AOS|1  
GCACTGCCACTGCTGCGGTTTCCCCAACATTTACTCCAAGTAACTTTAAGCAATATATTA  
>HPV51\_Alpha\_333087\_nt7439\_AOS|1  
CAACTGCCAGTTGTTTTTGGCATAAACCATCATTTTTTTATGACATAGTGCATACATCCG  
>HPV51\_Alpha\_333087\_nt7397\_AOS|1  
TCGGTTTCGTGTACTTTTAGTATATTTGCCAAGTTTTAAACCACAACCTGCCAGTTGTTTTT  
>HPV51\_Alpha\_333087\_nt7333\_AOS|1  
TATTTAGTTATACTTTGTAGCTTCCATTTTGTACAGCTGCAGCCATTTTGAGTGCAACC  
>HPV51\_Alpha\_333087\_nt7316\_AOS|1  
ACAGTTTATATTTGTGCTATTTAGTTATACTTTGTAGCTTCCATTTTGTACAGCTGCAG  
>HPV51\_Alpha\_333087\_nt5906\_AOS|1  
AAATTCACGCATAGCAAATGGCAATGCACAACAAGATGTTAGAGATAACACATCTGTTGA  
>HPV51\_Alpha\_333087\_nt3729\_AOS|1  
AACATTTATAAAAACCATTAAGTACCCCCAAGTGTAACACTGTCATTGGGAATTATGAC  
>HPV51\_Alpha\_333087\_nt3722\_AOS|1  
AACGGGAAACATTTATAAAAACCATTAAGTACCCCCAAGTGTAACACTGTCATTGGGAA  
>HPV51\_Alpha\_333087\_nt3701\_AOS|1  
TTGTGTTTGACAGTGCACATCAACGGGAAACATTTATAAAAACCATTAAGTACCCCCAA  
>HPV51\_Alpha\_333087\_nt2540\_AOS|2

ACAAGAGGATGCAAACCTAATGTATTTACATACAAGGGTAACAGTATTAAAGTTTTTTAA  
>HPV42\_Alpha\_333211\_nt7478\_AOS|1  
GTATCTGGCCTGTTACCAGGTGCATTGGCCATGTTTCCTAACATTTTGCAAACCTATTCA  
>HPV42\_Alpha\_333211\_nt7090\_AOS|1  
TATGTACAATCAGAAGCTATTTCGCTGTCAGGCTAAGGTAACAACGCCAGAAAAAAGGAT  
>HPV42\_Alpha\_333211\_nt5963\_AOS|1  
TGGTTGTTGGTCACCCCTTATTACTCTATTACAAAAAGGCCAAATAAGACATCTATCCCCA  
>HPV42\_Alpha\_333211\_nt5603\_AOS|1  
CCCTACATTACCTAGCATGTCTACACATTCTGCCAATACCACCATACCTTTTTTCGTTTCC  
>HPV42\_Alpha\_333211\_nt5035\_AOS|1  
TTGTATCTACAGATACAATAACACATTTACTAGTACTCCCATTCTGGCCCTCGGTTCGT  
>HPV42\_Alpha\_333211\_nt4856\_AOS|1  
AGATATCTCCCCCTCCCACTAATACTATACGTGTCACAACAACCTACATCTACCAATCCTTT  
>HPV42\_Alpha\_333211\_nt4389\_AOS|1  
TTATATTGTGTGTACTTCTTTTGTGCTATTACAATGCCACCACAACGGTCCCGCAGACGA  
>HPV42\_Alpha\_333211\_nt4382\_AOS|1  
ACTTTTGTATATTGTGTGTACTTCTTTTGTGCTATTACAATGCCACCACAACGGTCCCG  
>HPV42\_Alpha\_333211\_nt4110\_AOS|1  
GTACTAACATACTTTGACTATTTTTTTCTATGTTTAATCATTCTTGGTATTCCTTCTGTC  
>HPV39\_Alpha\_333245\_nt7375\_AOS|1  
AAGGTGTGTTTACTACCTAATATGTAATTTTACATTGTTGTATGCGTTTCTACATTTTA  
>HPV39\_Alpha\_333245\_nt6450\_AOS|1  
TTCCTGCCCCAATGTATATTAAGGGCACAGATATACGTGCAAACCCCGGTAGTTCTGTAT  
>HPV39\_Alpha\_333245\_nt5491\_AOS|1  
TTACCAAGTACTACTCCACAGTTGCCATTGGTGCCTTCTGGACCAATAGACACAACATAT  
>HPV39\_Alpha\_333245\_nt5377\_AOS|1  
AACACAGGCTCACTACCTTCTGTGGCTTCTTCAGCATCTACTAAATATGCCAATACAAC  
>HPV39\_Alpha\_333245\_nt5370\_AOS|1  
TACATATAACACAGGCTCACTACCTTCTGTGGCTTCTTCAGCATCTACTAAATATGCCAA  
>HPV39\_Alpha\_333245\_nt5348\_AOS|1  
ATAATACAAGGGATTTCGGGCACTACATATAACACAGGCTCACTACCTTCTGTGGCTTCTT  
>HPV39\_Alpha\_333245\_nt5341\_AOS|1  
GCATTTAATAATAACAAGGGATTTCGGGCACTACATATAACACAGGCTCACTACCTTCTGTG  
>HPV39\_Alpha\_333245\_nt5245\_AOS|1  
GAATTACAGCCCCTAGTTCACGCTGAGCCCTCTGATGCTTCAGATGCATTATTTGATATA  
>HPV39\_Alpha\_333245\_nt1211\_AOS|1  
CACTAGACCGTATGGAAAAAAGTAGGCAGGAATACCAGGGGAACACTACAGGAAATTTT  
>HPV93\_Beta\_37089393\_nt4383\_AOS|1  
TAGATACCATAGCTCCTGTAGAACCATCCTCATCTTCAATTGTTCCATTAAACAGAACTT  
>HPV93\_Beta\_37089393\_nt402\_AOS|1  
AGCCACTCTCTGAAATTATAGTGAGGTGTCGCCATTGTATGAAAAAATTAGATCAAATTG  
>HPV93\_Beta\_37089393\_nt395\_AOS|1  
GAAAAAAGCCACTCTCTGAAATTATAGTGAGGTGTCGCCATTGTATGAAAAAATTAGAT  
>HPV93\_Beta\_37089393\_nt388\_AOS|1  
AGTTAAGGAAAAAAGCCACTCTCTGAAATTATAGTGAGGTGTCGCCATTGTATGAAAAA  
>HPV93\_Beta\_37089393\_nt350\_AOS|1  
AATTACTTGAATGATAGTGTTGTTGGCTGGGCAATAGAAGTTAAGGAAAAAAGCCACTC  
>HPV93\_Beta\_37089393\_nt90\_AOS|1  
ATAAGTATTGATATATGGTATATAAGGCAGACATCTTAATGGCGGCAGTAAGTAAACCTC  
>HPV93\_Beta\_37089393\_nt83\_AOS|1  
CCTGTTTATAAGTATTGATATATGGTATATAAGGCAGACATCTTAATGGCGGCAGTAAGT  
>HPV93\_Beta\_37089393\_nt75\_AOS|1  
TCGTAGCACCTGTTTATAAGTATTGATATATGGTATATAAGGCAGACATCTTAATGGCGG  
>HPV12\_Beta\_396910\_nt6365\_AOS|2  
TGCGGGGATGCACCAGCTGAAAATGGTGTGTTGCCCTCCCATAGAGTTAAAGAACACTTTC



>HPV12\_Beta\_396910\_nt6358\_AOS|3  
CTTACCCTGCGGGGATGCACCAGCTGAAAATGGTGTGGCCCTCCCATAGAGTTAAAGAA  
>HPV12\_Beta\_396910\_nt6351\_AOS|2  
AGAAAGCCTTACCCTGCGGGGATGCACCAGCTGAAAATGGTGTGGCCCTCCCATAGAGT  
>HPV12\_Beta\_396910\_nt5094\_AOS|1  
GTGCAAGTTGATAATCCTTTATTTATAGATAAACCTTCTAAGTTAGTACGCTTTTCATTT  
>HPV12\_Beta\_396910\_nt5087\_AOS|1  
ACAACAAGTGCAAGTTGATAATCCTTTATTTATAGATAAACCTTCTAAGTTAGTACGCTT  
>HPV12\_Beta\_396910\_nt5032\_AOS|1  
GGACACAAACCCTGGCCGACGTAGAGGAGTGTCCCTAACAAATAGAAGGCTAGTACAAC  
>HPV12\_Beta\_396910\_nt5021\_AOS|1  
TCCACTTCAGAGGACACAAACCCTGGCCGACGTAGAGGAGTGTCCCTAACAAATAGAAG  
>HPV12\_Beta\_396910\_nt5014\_AOS|1  
GCAGCACTCCACTTCAGAGGACACAAACCCTGGCCGACGTAGAGGAGTGTCCCTAACAA  
>HPV12\_Beta\_396910\_nt5007\_AOS|1  
CGGCAAAGCAGCACTCCACTTCAGAGGACACAAACCCTGGCCGACGTAGAGGAGTGTCC  
>HPV12\_Beta\_396910\_nt4868\_AOS|1  
TGAAACATCTTTGGCAGACCACATCCTGGTCACATCTGGCTCAGGAGGTCAAACCTATAGG  
>HPV14D\_Beta\_396918\_nt5444\_AOS|1  
AGGATAGGGACATTAGCATGGATATTATTTATCCTACCCAGAGTTGCCTGTTGTCATTA  
>HPV14D\_Beta\_396918\_nt5362\_AOS|1  
TATACCGTCCCTCGTTTTGAAACAACCAGATCTGGGTCATATTATGCACAGGATACAAAA  
>HPV14D\_Beta\_396918\_nt5347\_AOS|1  
CGCTCAACATCTTCATATACCGTCCCTCGTTTTGAAACAACCAGATCTGGGTCATATTAT  
>HPV14D\_Beta\_396918\_nt5340\_AOS|2  
TAATCGACGCTCAACATCTTCATATACCGTCCCTCGTTTTGAAACAACCAGATCTGGGTC  
>HPV14D\_Beta\_396918\_nt5326\_AOS|1  
CAATTAGTTGTGGGTAATCGACGCTCAACATCTTCATATACCGTCCCTCGTTTTGAAACA  
>HPV14D\_Beta\_396918\_nt4834\_AOS|1  
GTCCAACAAGTTTCTGTAGAAAACCCCTTATTTTTTAACAAGACCATCTAGACTAGTGCAA  
>HPV14D\_Beta\_396918\_nt4598\_AOS|1  
CCGAATCCACCCCTACCACAGGTGAAAGTTCATTAGCAGACAATATATTGGTTACCTCTG  
>HPV14D\_Beta\_396918\_nt4591\_AOS|1  
GTAATTACCGAATCCACCCCTACCACAGGTGAAAGTTCATTAGCAGACAATATATTGGTT  
>HPV14D\_Beta\_396918\_nt4580\_AOS|2  
CCTCCTTTCAAGTAATTACCGAATCCACCCCTACCACAGGTGAAAGTTCATTAGCAGACA  
>HPV14D\_Beta\_396918\_nt2184\_AOS|1  
GTTGTATATGGACACTTATTTGAGGAATGGCCTTGATGGTCATTATGTTTCTTTAGATTG  
>HPV15\_Beta\_396924\_nt5489\_AOS|1  
TGAATCACCTAGAAATACTGGGTTTTACATACAAGATGTGCATGGGTATAATGTAGCCTA  
>HPV15\_Beta\_396924\_nt6555\_AOS|1  
TACCAGCACAATCAACCCAACAACAAAATAACTTAGCAAATCTACTTACTTTCCCACAG  
>HPV15\_Beta\_396924\_nt4900\_AOS|2  
ATAACAGACGGCTGACTGAACAAGTAGCTGTAACAGACCCTTTATTCTTGGGACGACCCT  
>HPV15\_Beta\_396924\_nt3923\_AOS|1  
TCTCTTCCAACACCGAAAGAGAGCTCTTTATCAAAATAATGAAACTGCCACCAGGCGTTG  
>HPV15\_Beta\_396924\_nt3911\_AOS|1  
TGTTACTGGCATTTCTTCTTCCAACACCGAAAGAGAGCTCTTTATCAAAATAATGAAACTGC  
>HPV15\_Beta\_396924\_nt3904\_AOS|1  
TCACGATTGTTACTGGCATTCTCTTCCAACACCGAAAGAGAGCTCTTTATCAAAATAATG  
>HPV15\_Beta\_396924\_nt3897\_AOS|1  
TGGACGCTCACGATTGTTACTGGCATTCTCTTCCAACACCGAAAGAGAGCTCTTTATCAA  
>HPV15\_Beta\_396924\_nt3890\_AOS|1  
ATAGAATTGGACGCTCACGATTGTTACTGGCATTCTCTTCCAACACCGAAAGAGAGCTCT  
>HPV15\_Beta\_396924\_nt441\_AOS|1

GTGTAGTTGGGAAATAGAGATAGTAGAACAGAAGCCTGTTGGAGATATTATTATTCGCTG  
>HPV15\_Beta\_396924\_nt434\_AOS|1  
AGTCGGTGTGTAGTTGGGAAATAGAGATAGTAGAACAGAAGCCTGTTGGAGATATTATTA  
>HPV17\_Beta\_396932\_nt5118\_AOS|1  
AAACACCTCAGGGTTATTTACGAGTCAGTAGACTAGGTAGAAGAGCCAGCATTCGTACTC  
>HPV17\_Beta\_396932\_nt5510\_AOS|1  
GAAACACCTAGGGACACTGGCTTTTACATACATGACACTCAGGGATACACAGTAGCATAT  
>HPV17\_Beta\_396932\_nt4842\_AOS|1  
GCACACCTCCTAGAACAAGTACTCCAGTTCAACGTGCAGTAGAATCACTATCAAGCTTAA  
>HPV17\_Beta\_396932\_nt4719\_AOS|1  
TAGTGTTCGAAGGTTTTGGTGGACAAAACATAGGAGGTTCCAGGAATGCAGCCATTGATA  
>HPV17\_Beta\_396932\_nt3933\_AOS|1  
TAGCATTTAACACATATGATGAAAGAGAATTGTTTATCCAAAAAATGAAGCTACCACCAG  
>HPV17\_Beta\_396932\_nt3926\_AOS|1  
ATGTTACTAGCATTTAACACATATGATGAAAGAGAATTGTTTATCCAAAAAATGAAGCTA  
>HPV17\_Beta\_396932\_nt1825\_AOS|1  
ACAGCACAGGCAACACAATTCGATCTATCTACCATGATACAATTTGCTTATGATAACGAA  
>HPV17\_Beta\_396932\_nt1809\_AOS|1  
TATGATTAATCATCAAACAGCACAGGCAACAAATTCGATCTATCTACCATGATACAATT  
>HPV17\_Beta\_396932\_nt830\_AOS|1  
TCGTTCAAGAGGAGCTTTTATTAGGTGAAGTACAGTTGGTGTGTCCTAACTGCAGAGA  
>HPV17\_Beta\_396932\_nt805\_AOS|1  
TTGTTCTTGCAACGCACGCTGGAATTCGTTTCAAGAGGAGCTTTTATTAGGTGAAGTAC  
>HPV19\_Beta\_396940\_nt5585\_AOS|1  
ACAGTTAGTAGTTGGTGGGCGCGTCTACTTCCACATATACAGTTCCCCAATTTGAAAC  
>HPV19\_Beta\_396940\_nt5272\_AOS|1  
ATTCAGAAACACCATCTGGTTACATCAGAGTTAGTCGCCTAGGCCAAAGGCGAACCATTC  
>HPV19\_Beta\_396940\_nt4150\_AOS|1  
AAGCACTTTGATGATACAGTAAGGTATCCTAAAGGTGTGGACCGATCGTTTGGCTCATTT  
>HPV19\_Beta\_396940\_nt488\_AOS|1  
AGTTCTATGAGCATACTGTAACAGGTAGAGAAATTGAGTTTGTAAACAGGTAAATCTGTCT  
>HPV19\_Beta\_396940\_nt219\_AOS|1  
AGAAGAAGAGATAGAAATTGTAGAAGAGGGAAGTACTGCACCACAGGTCACAGAGCCACC  
>HPV19\_Beta\_396940\_nt212\_AOS|1  
AGGCTACAGAAGAAGAGATAGAAATTGTAGAAGAGGGAAGTACTGCACCACAGGTCACAG  
>HPV19\_Beta\_396940\_nt205\_AOS|1  
AACGCACAGGCTACAGAAGAAGAGATAGAAATTGTAGAAGAGGGAAGTACTGCACCACAG  
>HPV19\_Beta\_396940\_nt198\_AOS|1  
TATGGCTAACGCACAGGCTACAGAAGAAGAGATAGAAATTGTAGAAGAGGGAAGTACTGC  
>HPV19\_Beta\_396940\_nt191\_AOS|1  
GCAAACCTTATGGCTAACGCACAGGCTACAGAAGAAGAGATAGAAATTGTAGAAGAGGGAA  
>HPV19\_Beta\_396940\_nt183\_AOS|1  
TTGCAGCTGCAAACCTTATGGCTAACGCACAGGCTACAGAAGAAGAGATAGAAATTGTAGA  
>HPV25\_Beta\_396948\_nt3784\_AOS|1  
AGCAGGGGGGGCGCGCAGGGGCGGGAGACGACGACACAGATTGTCTGAATCCCCCACC  
>HPV25\_Beta\_396948\_nt5666\_AOS|1  
GAAACTACACGCTCTGCATCATATTATACCCAAGATATTCAGGGATACTATGTGTCCTAT  
>HPV25\_Beta\_396948\_nt5037\_AOS|1  
CAAGACAAAGTAGTACACCTCTTCAAAGGATTAGGACTGCATTAAAGACGTAGAGGAGGAT  
>HPV25\_Beta\_396948\_nt4737\_AOS|1  
TTGTACCCTCCACTGACACCCCGGTGACAACAACTTCTAGAGGTGCCAGCGCAGTTTTAG  
>HPV25\_Beta\_396948\_nt3802\_AOS|1  
AGGGGCGGGAGACGACGACACAGATTGTCTGAATCCCCCACCTCCAAGCGATCACGAAGA  
>HPV25\_Beta\_396948\_nt3777\_AOS|1  
AGGGAGCAGCAGGGGGGGCGCGGCAGGGGCGGGAGACGACGACACAGATTGTCTGAATC

>HPV25\_Beta\_396948\_nt475\_AOS|1  
TTTTACGAAAGCACTGTAACAGGTAGGGAAATTGAAGACGTTACAGGTAAATCAATTTTT  
>HPV25\_Beta\_396948\_nt203\_AOS|1  
CAACTGCAAATGCTGAACAGAGCATAGGACCACCAGAGCAAGCGCAGGTTATACAGCCAC  
>HPV25\_Beta\_396948\_nt196\_AOS|1  
CTTATGGCAACTGCAAATGCTGAACAGAGCATAGGACCACCAGAGCAAGCGCAGGTTATA  
>HPV25\_Beta\_396948\_nt189\_AOS|1  
ATTAGGACTTATGGCAACTGCAAATGCTGAACAGAGCATAGGACCACCAGAGCAAGCGCA  
>HPV27\_Alpha\_396964\_nt5475\_AOS|1  
ACGATTACTACCCAGCCCCCTCGCGGCTCCCTGGCTAATACCACGGTATCTGCCTCCTCTG  
>HPV27\_Alpha\_396964\_nt5893\_AOS|1  
CTGTGCGGCCACCCATATTATTCTATAAAGAAGGGTAGCAATAATAGGTTGGCAGTGCCTA  
>HPV27\_Alpha\_396964\_nt5468\_AOS|1  
CCATTGGACGATTACTACCCAGCCCCCTCGCGGCTCCCTGGCTAATACCACGGTATCTGCC  
>HPV27\_Alpha\_396964\_nt4216\_AOS|1  
CGTGATGATATTGACTGTCTGTTGGTGATTCTCACCTCATTGGCTTATTATTGTTGTTG  
>HPV30\_Alpha\_396973\_nt7587\_AOS|1  
GTTTCCTGCACTTTATGTTTTTTTTTGAACGTAAGACGCCTCGCCTTATTAGTCATATA  
>HPV30\_Alpha\_396973\_nt7376\_AOS|1  
CTATGTCCTCCACCCTTTTTTGGTTGTTGCACACCACCTGTGCAGTTACTTTTTATATTTAT  
>HPV30\_Alpha\_396973\_nt7144\_AOS|1  
CAAGCGGCGGTGATTGTTTGTGTCTGTGTATGTTTCCTTACTATTTATTGTGCATGAATG  
>HPV30\_Alpha\_396973\_nt7137\_AOS|1  
CCAAACGCAAGCGGCGGTGATTGTTTGTGTCTGTGTATGTTTCCTTACTATTTATTGTGC  
>HPV30\_Alpha\_396973\_nt6823\_AOS|1  
TACTATGAACTCCACTTTACTTTGAGGGCTGGAATATTGGATTGTCACCCCCAGCTGCCAC  
>HPV30\_Alpha\_396973\_nt4719\_AOS|1  
TGGCTCTGTCCATGTTAGTAGTACCCATTTTACCAATCCCTCCTTTGTTGAACCCCCAGT  
>HPV30\_Alpha\_396973\_nt4712\_AOS|1  
CTACCACTGGCTCTGTCCATGTTAGTAGTACCCATTTTACCAATCCCTCCTTTGTTGAAC  
>HPV30\_Alpha\_396973\_nt3139\_AOS|1  
TTACTGTGGGGACAATGGGTGGACTAAAGTGCCTTCTGTAGTAGATTACAAAGGTATATA  
>HPV30\_Alpha\_396973\_nt1356\_AOS|1  
GGAAAACAGCATAGAAGCAGACAGTGATATGGATATAGGCGCCACGCCACCACAGCAAAT  
>HPV30\_Alpha\_396973\_nt260\_AOS|1  
AGACTGGTATATAGGGAGGACAGCCCATATGCAGTGTGCAATTTCTGTTTATTATTTTAT  
>HPV3\_Alpha\_397005\_nt5431\_AOS|1  
GATGCTGACATAGGTTTTACATCTGGAGGTCGTAGTGACACTCTGTCTAGAGGCCGTGCT  
>HPV3\_Alpha\_397005\_nt4264\_AOS|1  
TCCTTGATGTATATGCCCTAGTGTGGTATTGTACCACCGTCTTTTATACTGCTATGTTTT  
>HPV3\_Alpha\_397005\_nt4247\_AOS|1  
TCACCTGTATGTATTCTTCCTTGATGTATATGCCCTAGTGTGGTATTGTACCACCGTCTT  
>HPV3\_Alpha\_397005\_nt4240\_AOS|2  
TTGCAGGTCACCTGTATGTATTCTTCCTTGATGTATATGCCCTAGTGTGGTATTGTACCA  
>HPV3\_Alpha\_397005\_nt4228\_AOS|1  
GTAAGGTTGTAGTTGCAGGTCACCTGTATGTATTCTTCCTTGATGTATATGCCCTAGTGT  
>HPV3\_Alpha\_397005\_nt4218\_AOS|1  
TGGGACTCCTGTAAGGTTGTAGTTGCAGGTCACCTGTATGTATTCTTCCTTGATGTATAT  
>HPV3\_Alpha\_397005\_nt4134\_AOS|1  
TGTTTGTTGAGCCTGGAGACGTGTACATATTATTGCTGTTTATGTTAGCTGTCATACTTA  
>HPV3\_Alpha\_397005\_nt4127\_AOS|1  
CTTGTCTTGTTGTTGAGCCTGGAGACGTGTACATATTATTGCTGTTTATGTTAGCTGTC  
>HPV3\_Alpha\_397005\_nt4119\_AOS|1  
GCGACCATCTGTCTTGTTGTTGAGCCTGGAGACGTGTACATATTATTGCTGTTTATGTT  
>HPV3\_Alpha\_397005\_nt2174\_AOS|1

GGTACCAGGACGTAGAAATTTATACCATTTCTATGCGCTCTGAAATCATTCCTACAAGGAA  
>HPV40\_Alpha\_397014\_nt7524\_AOS|1  
TTCAGTGTTGACCATGTACTTTTTGTGTCTAAATCCTCCATTTTGTACTGCGCGACCGCT  
>HPV40\_Alpha\_397014\_nt7517\_AOS|1  
CGTCTTGTTTCAGTGTTGACCATGTACTTTTTGTGTCTAAATCCTCCATTTTGTACTGCGC  
>HPV40\_Alpha\_397014\_nt7510\_AOS|1  
GTCATGGCGTCTTGTTTCAGTGTTGACCATGTACTTTTTGTGTCTAAATCCTCCATTTTGT  
>HPV40\_Alpha\_397014\_nt7502\_AOS|1  
ATGGCAGTGTCATGGCGTCTTGTTTCAGTGTTGACCATGTACTTTTTGTGTCTAAATCCTC  
>HPV40\_Alpha\_397014\_nt5895\_AOS|1  
AGGTTACTGACTATAGGACATCCATACTTTGAGTTAAAAAAACCCAATGGTGACATTTCA  
>HPV40\_Alpha\_397014\_nt4030\_AOS|1  
TGTCCTAATCTGTATGTGTGGAGCTCTATACTGTCTGCTATCTCCATTTTGTGCTTTGT  
>HPV40\_Alpha\_397014\_nt4022\_AOS|1  
TGTGTGTGTGTCCCTAATCTGTATGTGTGGAGCTCTATACTGTCTGCTATCTCCATTTTG  
>HPV40\_Alpha\_397014\_nt3791\_AOS|1  
GGTCTGACTTCTTAGCTATTGTAAAAATACCAAAAACAATAAACATAGCTTGGGTATGT  
>HPV40\_Alpha\_397014\_nt285\_AOS|1  
CATGTCCACGGTGCCTGGACCTGCACGAAAAAGTAAACCAATACAGAACTTTAGATACG  
>HPV45\_Alpha\_397022\_nt7514\_AOS|1  
TAAACATAATACCTAAACTGGCACATTTACAACCCCTACATAGTTTAACCTACTGGCGCG  
>HPV45\_Alpha\_397022\_nt7098\_AOS|1  
TCTACTGCATCTAGGCCTGCCAAACGTGTACGTATACGTAGTAAGAAATAATATGTTAGC  
>HPV45\_Alpha\_397022\_nt5352\_AOS|1  
ATTCTTGACCATGCCTTCTACTGCTGCATCCTCTTACAGTAATGTTACAGTACCATTAA  
>HPV45\_Alpha\_397022\_nt5342\_AOS|1  
TATCCAAAGTATTCCTTGACCATGCCTTCTACTGCTGCATCCTCTTACAGTAATGTTACA  
>HPV45\_Alpha\_397022\_nt5335\_AOS|1  
ATTTACATATCCAAAGTATTCCTTGACCATGCCTTCTACTGCTGCATCCTCTTACAGTAA  
>HPV45\_Alpha\_397022\_nt5328\_AOS|1  
ACAAATCATTTACATATCCAAAGTATTCCTTGACCATGCCTTCTACTGCTGCATCCTCTT  
>HPV45\_Alpha\_397022\_nt1443\_AOS|1  
TGTAGATCCGCATTGCAGTATTACAGAACTAAAGGAGCTATTACAAGCAAGTAACAAAAA  
>HPV45\_Alpha\_397022\_nt1436\_AOS|1  
CAGAAAATGTAGATCCGCATTGCAGTATTACAGAACTAAAGGAGCTATTACAAGCAAGTA  
>HPV45\_Alpha\_397022\_nt1429\_AOS|1  
GACAATGCAGAAAATGTAGATCCGCATTGCAGTATTACAGAACTAAAGGAGCTATTACAA  
>HPV52\_Alpha\_397038\_nt7837\_AOS|1  
GCCAAATATGTCTTGTAACCATGATTAAATACTGTTACTCACCAGGTGTGCACTACACG  
>HPV52\_Alpha\_397038\_nt7597\_AOS|1  
ACAGTAACAACATATTTTATATAAGTTTCAGCAAACCTGCTTAATCCTTTGGTTTCCTGCA  
>HPV52\_Alpha\_397038\_nt7582\_AOS|1  
TTGGTTGTCTTGGCACAGTAACAACATATTTTATATAAGTTTCAGCAAACCTGCTTAATC  
>HPV52\_Alpha\_397038\_nt5495\_AOS|1  
CTTCGTTACCCACACATACTCCTTTTGTTCCTATAGCCCCTACAGCTCCATCTACATCTA  
>HPV52\_Alpha\_397038\_nt5482\_AOS|1  
GACATTCCATTACCTTCGTTACCCACACATACTCCTTTTGTTCCTATAGCCCCTACAGCT  
>HPV52\_Alpha\_397038\_nt5472\_AOS|1  
GTCAGGTCTGACATTCCATTACCTTCGTTACCCACACATACTCCTTTTGTTCCTATAGC  
>HPV52\_Alpha\_397038\_nt5465\_AOS|1  
CCATTGAGTCAGGTCCTGACATTCCATTACCTTCGTTACCCACACATACTCCTTTTGTTC  
>HPV52\_Alpha\_397038\_nt5348\_AOS|1  
ATGCAGATTCTTTGCAGCAACCCACGTTTCACTTACCTTCCACACTTTCTACCCATAATA  
>HPV52\_Alpha\_397038\_nt4982\_AOS|1  
CTTTTATGTCATCACCACAGAAATTAGTAACATATAACAATCCTGTTTTTGAGGGCGTTG

>HPV52\_Alpha\_397038\_nt329\_AOS|1  
AGGCATTATCAATATTCACCTGTATGGGAAAACATTAGAAAGAGAGGGTAAAAAAACCATTA  
>HPV56\_Alpha\_397053\_nt7708\_AOS|1  
TTTGGTGT TTTGGCTTGCAGAATACACTATGTAGGCCAAGTATCTGTCAGTATCTGTTTT  
>HPV56\_Alpha\_397053\_nt7585\_AOS|1  
TATACTTGAATTATGTACAGTACCGCACCCCTGTATTACTCACAGGTACTATGACTGCCAA  
>HPV56\_Alpha\_397053\_nt7578\_AOS|1  
TGTGTTTTTATACTTGAATTATGTACAGTACCGCACCCCTGTATTACTCACAGGTACTATGA  
>HPV56\_Alpha\_397053\_nt1052\_AOS|1  
TTCATATATACAAAATATACAGGCAGACGCAGAAACAGTCAACAATTGTTGCAAGTACAA  
>HPV56\_Alpha\_397053\_nt1045\_AOS|1  
TAGACGATTTCATATATACAAAATATACAGGCAGACGCAGAAACAGTCAACAATTGTTGCA  
>HPV56\_Alpha\_397053\_nt253\_AOS|1  
TGAATTAAAAATTAGTGTATAGGGATGATTTTCCTTATGCAGTGTGCAGAGTATGTTTATT  
>HPV56\_Alpha\_397053\_nt66\_AOS|1  
ATATAAAAGGCAGCTTATTCTGTGTGGACATATCCATGGAGCCACAATTCAACAATCCAC  
>HPVcand62\_Alpha\_39932599\_nt7255\_AOS|1  
CCTACCTCTGCTAAACGAAAGCGCAGGAAGTAACTGTATGGTATGTGTGTGTGTGC  
>HPVcand62\_Alpha\_39932599\_nt5645\_AOS|1  
GTCTGTGCTAACGCCTTCCTTCCTGCAACTACCCCATATTCTATATATATTGTAGGTTT  
>HPVcand62\_Alpha\_39932599\_nt5558\_AOS|1  
TAATGTCACTGTACCATTATCCACTGGGTTGTCCGTTCCAGCGTCCACTGGCCCTGATGT  
>HPVcand62\_Alpha\_39932599\_nt5551\_AOS|1  
CTCATACTAATGTCACTGTACCATTATCCACTGGGTTGTCCGTTCCAGCGTCCACTGGCC  
>HPVcand62\_Alpha\_39932599\_nt5544\_AOS|1  
GCATCCTCTCATACTAATGTCACTGTACCATTATCCACTGGGTTGTCCGTTCCAGCGTCC  
>HPVcand62\_Alpha\_39932599\_nt5520\_AOS|2  
GCCACCATATCTGCCACGTCTGTGGCATCCTCTCATACTAATGTCACTGTACCATTATCC  
>HPVcand62\_Alpha\_39932599\_nt4186\_AOS|1  
TTGGGGTCTGATGACAGTGGTCTACTGTTTTTATTGTGCCTCATAGTGGCATTAATACTG  
>HPVcand62\_Alpha\_39932599\_nt3433\_AOS|1  
GGACAATAACGAGTACGGGACCAACAGTTACCCTGACAGCACAAAAGGACGACACGTGTG  
>HPVcand62\_Alpha\_39932599\_nt1259\_AOS|1  
TAGATGTGCAACAATCGCAGGAACGCACAGCAAGTATTGTAGAGCTGTTAAAAACCAGTA  
>HPVcand62\_Alpha\_39932599\_nt1246\_AOS|1  
CCGGAACGCAGTGTAGATGTGCAACAATCGCAGGAACGCACAGCAAGTATTGTAGAGCTG  
>HPV43\_Alpha\_40804474\_nt7556\_AOS|1  
TGGTTTTAGTAATGGTTACTGTTGTGGGTATGTAAATGGCGTCTGAACGTCTTCCATTT  
>HPV43\_Alpha\_40804474\_nt6554\_AOS|1  
GACGTTGTGCCTTCCGATATGTATATTGCTGGCTCTAATACCAGGTCCAAAATTGCAGAT  
>HPV43\_Alpha\_40804474\_nt6547\_AOS|2  
AACTGGCGACGTTGTGCCTTCCGATATGTATATTGCTGGCTCTAATACCAGGTCCAAAAT  
>HPV43\_Alpha\_40804474\_nt6537\_AOS|1  
AAGCTGGTAAAACTGGCGACGTTGTGCCTTCCGATATGTATATTGCTGGCTCTAATACCA  
>HPV43\_Alpha\_40804474\_nt4313\_AOS|1  
CAGAACACTTAAGTTGCATCAGTCCTCCAGCAAATAAACAATCCTTTATATAATCACTTG  
>HPV43\_Alpha\_40804474\_nt4287\_AOS|1  
TTAATATTGGTGTTAGCGTTTCATTACAGAACACTTAAGTTGCATCAGTCCTCCAGCAA  
>HPV43\_Alpha\_40804474\_nt4089\_AOS|1  
TTATTTTTTGTCTTGGGGCGTCCTTACATCACCTATTAACGTTTTTATATTGGCGTTGTT  
>HPV43\_Alpha\_40804474\_nt4071\_AOS|1  
TGCATGTGCTTCTATCTTTTTATTTTTTGTCTTGGGGCGTCCTTACATCACCTATTAACGT  
>HPV43\_Alpha\_40804474\_nt3877\_AOS|1  
TATATTTGTATAGAGGAAGTAACTGTGATAAAAGGGGGGGTATTGTACCCCAACCACA  
>HPV81\_Alpha\_40804509\_nt7474\_AOS|1

ATTGTATGCGTGCTGCCCTTTTGGCCCTACACTGTTGTTTGTATATTTGTGGAATGTGTG  
>HPV81\_Alpha\_40804509\_nt7328\_AOS|1  
CCAGGACCCCCACTACCTCTGCTAAGCGAAAACGTAAAAAATAGTAGTATGCTTGTTTGT  
>HPV81\_Alpha\_40804509\_nt6381\_AOS|1  
TGCTAATGTTGCTCCAGCACAAAACGAATGCCCCCCTTGAGTTTAAAAATACAACCAT  
>HPV81\_Alpha\_40804509\_nt5765\_AOS|1  
CGCCATATATGTTGTTGGCACTGATTTTTACTTGTTTCCTTCTTATATATTCTTCCCTAA  
>HPV81\_Alpha\_40804509\_nt5752\_AOS|1  
CAACTACCCCGTACGCCATATATGTTGTTGGCACTGATTTTTACTTGTTTCCTTCTTATA  
>HPV81\_Alpha\_40804509\_nt5744\_AOS|1  
GTTTCCTGCAACTACCCCGTACGCCATATATGTTGTTGGCACTGATTTTTACTTGTTTCC  
>HPV81\_Alpha\_40804509\_nt5737\_AOS|1  
TCCCTTCGTTTCCCTGCAACTACCCCGTACGCCATATATGTTGTTGGCACTGATTTTTACT  
>HPV81\_Alpha\_40804509\_nt924\_AOS|1  
GTTGTAGAAAAAACACAGGGTATCAGGAATCAAGTGATGAAGAGGAAGATAGTGCAGAT  
>HPV81\_Alpha\_40804509\_nt917\_AOS|1  
GGAGGCTGTTGTAGAAAAAACACAGGGTATCAGGAATCAAGTGATGAAGAGGAAGATAG  
>HPV95\_Gamma\_40804520\_nt7122\_AOS|1  
CATTAAGTAAGACGCTGGCGAAGAAAAGAGACGCTCCTTATTTTTTTTGGAAAAATATT  
>HPV95\_Gamma\_40804520\_nt7027\_AOS|1  
GCAATAAACTATACCTCCAATTACTATTGTGTGCCATGCTTTGTGACTCATGTGGTCAATA  
>HPV95\_Gamma\_40804520\_nt6822\_AOS|2  
ATAAATGGATCTCGTAAAAGACAAAGAGCTATTACTTCTCAAACAGGCACAAAA  
>HPV95\_Gamma\_40804520\_nt6815\_AOS|1  
TGGATTAATAAATGGATCTCGTAAAAGACAAAGAGCTATTACTTCTCAAACAGGC  
>HPV95\_Gamma\_40804520\_nt6803\_AOS|2  
TCTCTATCAGAGTGGATTAATAAATGGATCTCGTAAAAGACAAAGAGCTATTACTTCTCA  
>HPV95\_Gamma\_40804520\_nt6205\_AOS|1  
CTGATTACATAATTGCTGCTCAGAGTAACCAAGAACAAAATAATCTTGGCCCTCACATTT  
>HPV95\_Gamma\_40804520\_nt422\_AOS|1  
AAACTATTAGACATAGTAGAAAACTTGACCTGTTATACAGTGGTGAGGTGTGCTATTTA  
>HPV95\_Gamma\_40804520\_nt415\_AOS|1  
CTGTCTTAACTATTAGACATAGTAGAAAACTTGACCTGTTATACAGTGGTGAGGTGTG  
>HPV95\_Gamma\_40804520\_nt408\_AOS|1  
GTTTATGCTGTCTTAACTATTAGACATAGTAGAAAACTTGACCTGTTATACAGTGGTG  
>HPV94\_Alpha\_40804528\_nt5600\_AOS|2  
ACCGGGCCTGACATTATATTACCCACCTCGGCGCAGTGGCCTTATGTGCCTTTAACACCT  
>HPV94\_Alpha\_40804528\_nt7013\_AOS|1  
CTTGGAGGACACTTATAGTTCTTGTCTCCTCCGCAATAACTTGTGAGAGGAGGCACC  
>HPV94\_Alpha\_40804528\_nt6577\_AOS|2  
ACACCATTCCCTGACACTCTAATATTGAAGTCGGCCGGTGGTGACCAAAACGTTGGTAGTG  
>HPV94\_Alpha\_40804528\_nt6570\_AOS|2  
GTGGGAGACACCATTCCTGACACTCTAATATTGAAGTCGGCCGGTGGTGACCAAAACGTT  
>HPV94\_Alpha\_40804528\_nt6555\_AOS|1  
AATAGAGCCAGTGCAGTGGGAGACACCATTCCTGACACTCTAATATTGAAGTCGGCCGGT  
>HPV94\_Alpha\_40804528\_nt5484\_AOS|1  
GAAGTGTACACCCGGCACGGAGCTATAGTACTGCTTCCCCTTTGTCTCTACACTTTCAA  
>HPV94\_Alpha\_40804528\_nt5469\_AOS|1  
TTACAAATGGCACTCGAAGTGTACACCCGGCACGGAGCTATAGTACTGCTTCCCCTTTGT  
>HPV94\_Alpha\_40804528\_nt5461\_AOS|1  
TGTTGCCCTTTACAAATGGCACTCGAAGTGTACACCCGGCACGGAGCTATAGTACTGCTTC  
>HPV94\_Alpha\_40804528\_nt5454\_AOS|1  
ATGGTGATGTTGCCCTTTACAAATGGCACTCGAAGTGTACACCCGGCACGGAGCTATAGTA  
>HPV94\_Alpha\_40804528\_nt4247\_AOS|1  
ACCTGGGTGTATTGTGATATGGATGTAGACGCCTGTGCATAATCTAATGTTTTGCTGTGT

>HPVcand85\_Alpha\_4574720\_nt7507\_AOS|1  
ATTATTTAAAGTTAAATCCTTTTTGGCTCTGTTTAAGGCGCCAGTGAGCCAGTGGCGCAC  
>HPVcand85\_Alpha\_4574720\_nt7500\_AOS|1  
TTGTTACATTATTTAAAGTTAAATCCTTTTTGGCTCTGTTTAAGGCGCCAGTGAGCCAGT  
>HPVcand85\_Alpha\_4574720\_nt3992\_AOS|1  
CACTATTCCGCTTTTTCTGCTACTAATGTGTGTGCGCATGCTTGGCTACTTGTGTTTTT  
>HPVcand85\_Alpha\_4574720\_nt3551\_AOS|1  
ACTAGAAACCCATTTCAGACATTGTGGATTTCACAGAAACAAGTGAAGTCGACGGACTGTCC  
>HPVcand85\_Alpha\_4574720\_nt3538\_AOS|1  
GGGTTCGGCGCCGACTAGAAACCCATTTCAGACATTGTGGATTTCACAGAAACAAGTGAAGT  
>HPVcand85\_Alpha\_4574720\_nt3312\_AOS|1  
AGTTTAAATGTGATGCACAACAATATGGACAGAGCGGTAAATGGGAAGTGTGGTATAATG  
>HPVcand85\_Alpha\_4574720\_nt1395\_AOS|1  
GAAAAATGGCGACGGTTTAAATAGTGAGGCATGTAGTACAGATAATGAAATGGATATAGA  
>HPVcand85\_Alpha\_4574720\_nt1383\_AOS|1  
GTTTGGGGATGGGAAAAATGGCGACGGTTTAAATAGTGAGGCATGTAGTACAGATAATGA  
>HPVcand85\_Alpha\_4574720\_nt1368\_AOS|1  
CCTAGATACAAATGTGTTTGGGGATGGGAAAAATGGCGACGGTTTAAATAGTGAGGCATG  
>HPVcand85\_Alpha\_4574720\_nt1360\_AOS|2  
CAGGTAACCCTAGATACAAATGTGTTTGGGGATGGGAAAAATGGCGACGGTTTAAATAGT  
>HPV96\_Beta\_50253426\_nt4204\_AOS|1  
TGGTAGCTTTGATAGTCTTTAACTACTAACATTTTCATTTTTTTTATACTAATAACTAACCC  
>HPV96\_Beta\_50253426\_nt4195\_AOS|1  
TTGGTCCTTTGGTAGCTTTGATAGTCTTTAACTACTAACATTTTCATTTTTTTTATACTAAT  
>HPV96\_Beta\_50253426\_nt3060\_AOS|2  
AATTAAGAGACTCACCTTACAAAGATGAACCTTGGACATTGATTAACACCAGTTTAGAAA  
>HPV96\_Beta\_50253426\_nt3048\_AOS|1  
TTCAACTAGAGAAATTAAGAGACTCACCTTACAAAGATGAACCTTGGACATTGATTAACA  
>HPV96\_Beta\_50253426\_nt1650\_AOS|1  
AACTGCATATGGAGTTAAAGAGGAATTATTAGAAGGATGTAAGCAACTGTTACAAGAACA  
>HPV96\_Beta\_50253426\_nt696\_AOS|1  
GTATCAAGAAAACTTTTATTTAGTAAGAGGAGGTTGGAAAGGCATTTGCAGATATTGTAG  
>HPV96\_Beta\_50253426\_nt484\_AOS|1  
TTAAATCTTATTTGGAAGGAAGGTTATGCATATGCGTGTTGTTCAATTGTGCTAGAACA  
>HPV83\_Alpha\_5059324\_nt6565\_AOS|1  
TTATATTCCAGGCACATCTGCTAATAGTAGGAACACTCTTACCAGCTACATCTATGCTCC  
>HPV83\_Alpha\_5059324\_nt6558\_AOS|1  
CCTCTTATTATATTCCAGGCACATCTGCTAATAGTAGGAACACTCTTACCAGCTACATCT  
>HPV83\_Alpha\_5059324\_nt5608\_AOS|1  
GCAGACCCTTCTGTTTCCTGTGCCATCTAATATTCCTATTCAGTCTGTGTTTATAGACGGT  
>HPV83\_Alpha\_5059324\_nt5599\_AOS|1  
CATATGCCTGCAGACCCTTCTGTTTCCTGTGCCATCTAATATTCCTATTCAGTCTGTGTTT  
>HPV83\_Alpha\_5059324\_nt4164\_AOS|1  
TGGCCGGGACGAAGTGGGATTACTGCTTATTATTTTAATTCTCATCGTAATTATTATTAT  
>HPV83\_Alpha\_5059324\_nt4152\_AOS|1  
TTTAATTGTTATTGGCCGGGACGAAGTGGGATTACTGCTTATTATTTTAATTCTCATCGT  
>HPV83\_Alpha\_5059324\_nt4139\_AOS|1  
GGCAGGCATATGATTTAATTGTTATTGGCCGGGACGAAGTGGGATTACTGCTTATTATTT  
>HPV83\_Alpha\_5059324\_nt4106\_AOS|1  
TCACTATGTATCCATTGGAGGCTAGAGGTGGGGGCAGGCATATGATTTAATTGTTATTG  
>HPV83\_Alpha\_5059324\_nt3859\_AOS|1  
ACCAGTACAACCCTGGATTACATATTGTGCTTGATTTGTTTGTGGTGTCATATTCCTGTG  
>HPV83\_Alpha\_5059324\_nt3822\_AOS|1  
TTTGCAAATACCTGAGCCACTATACACCACACCATATACCAGTACAACCCTGGATTACAT  
>HPV59\_Alpha\_557236\_nt6416\_AOS|1

TTCCTGAATCACTATATATTAAAGGTACTGACATACGTGCCAACCCAGGCAGTTATTTAT  
>HPV59\_Alpha\_557236\_nt5491\_AOS|1  
CTACACCCCTTTACCACCATACAGTCTATTAATATAGAAGGCACAAATTATTTTTTATGGC  
>HPV59\_Alpha\_557236\_nt5476\_AOS|1  
AACCCACTTATCTACTACACCCCTTTACCACCATACAGTCTATTAATATAGAAGGCACAA  
>HPV59\_Alpha\_557236\_nt5456\_AOS|1  
ACCTAATACTAATATTGTTGAACCCACTTATCTACTACACCCCTTTACCACCATACAGTC  
>HPV59\_Alpha\_557236\_nt5328\_AOS|1  
ACAATTCCCTAAATCTTCTTTTCAAAGTTTGTCATTAACACGGTCGGCATCTAGCACCTTT  
>HPV59\_Alpha\_557236\_nt5321\_AOS|1  
TGCATTTACAATTCCTAAATCTTCTTTTCAAAGTTTGTCATTAACACGGTCGGCATCTAG  
>HPV59\_Alpha\_557236\_nt5313\_AOS|1  
GCCAACACTGCATTTACAATTCCTAAATCTTCTTTTCAAAGTTTGTCATTAACACGGTCG  
>HPV59\_Alpha\_557236\_nt5300\_AOS|2  
ACCTACTAGTACTGCCAACACTGCATTTACAATTCCTAAATCTTCTTTTCAAAGTTTGTC  
>HPV59\_Alpha\_557236\_nt5293\_AOS|1  
ATGAAGCACCTACTAGTACTGCCAACACTGCATTTACAATTCCTAAATCTTCTTTTCAA  
>HPV59\_Alpha\_557236\_nt1414\_AOS|1  
ACATCCCCCACTAATCAATTGTTACAGTTATTACATAGCAAAAATAAGAAAGCAGCTATG  
>HPV6\_Alpha\_6002612\_nt7533\_AOS|1  
TGGCTGTTGCACGCGTTTTTGGTTTGCACGCGCCTTACACACATAAGTAATATACATGCAC  
>HPV6\_Alpha\_6002612\_nt7504\_AOS|1  
TGTATATCTTGTTACACCCTGTGACTCAGTGGCTGTTGCACGCGTTTTTGGTTTGCACGCG  
>HPV6\_Alpha\_6002612\_nt7491\_AOS|1  
TTAACTACATTATTGTATATCTTGTTACACCCTGTGACTCAGTGGCTGTTGCACGCGTTT  
>HPV6\_Alpha\_6002612\_nt6604\_AOS|2  
AATTAAGGGTAGTGGAATCGAACGTCTGTAGGGAGTAGTATATATGTTAACACCCCAAG  
>HPV6\_Alpha\_6002612\_nt5334\_AOS|1  
TATGCACACTCGCAGCGGAAAGCACATAGGGGCCCCGATTCATTATTTTTATGATATTTT  
>HPV6\_Alpha\_6002612\_nt4639\_AOS|1  
CCCTTAGGAACCTTCTGCAAAACCTTCTATTACTAGTGGGCTATGGCTCGTCCTCCTGTG  
>HPV6\_Alpha\_6002612\_nt4211\_AOS|1  
TGTTATGTGCCTTTATTGTAGGGGTGTTGGGGTTATTATTAATGCACTATAGAGCTGTAC  
>HPV6\_Alpha\_6002612\_nt3489\_AOS|1  
TTGGACCCGTGGACAGTGGAAACCACAACGTCATCACTAACAATCACGACCAGCACCAAA  
>HPV6\_Alpha\_6002612\_nt3128\_AOS|1  
GATGTGTATGTGCAGGACACTGACTCCTGGGTAAAGGTGCATAGTATGGTAGATGCTAAG  
>HPV57\_Alpha\_60882\_nt6960\_AOS|2  
CCCCGTCCGCCAGCCTGCAGGACACCTACAGGTATTTGCAATCCCAAGCGATAACATGTC  
>HPV57\_Alpha\_60882\_nt7430\_AOS|1  
GTAATTGTCCCCGCTGCATGGTTTGCACACTGTGGCCTGTATGTAGCCCCCTGGTAGATA  
>HPV57\_Alpha\_60882\_nt7220\_AOS|2  
AAGGTCAGGCGATAGTGATTCTGTGTCTGCCTCATTTCTTTTGCTCTACTTTTGTATATG  
>HPV57\_Alpha\_60882\_nt4317\_AOS|1  
TATCGGTGTGCACCTGATTGCCTTTGTATTGCTACGTGTCAATAAACTTATTGCCATGTC  
>HPV57\_Alpha\_60882\_nt4310\_AOS|1  
ACATTTTTATCGGTGTGCACCTGATTGCCTTTGTATTGCTACGTGTCAATAAACTTATTG  
>HPV57\_Alpha\_60882\_nt4230\_AOS|1  
ATTTTGTTGTTGATGCTGTACGTCCGTCTGTCAGTAGTGTACATACTCATTGTGTTTTT  
>HPV57\_Alpha\_60882\_nt4120\_AOS|2  
ATACTGCAATGTATCCTGCTGTGTACAAGGCGACGGGCGGGTCGTATCCCATTTGTCCTGT  
>HPV57\_Alpha\_60882\_nt4061\_AOS|1  
CAATAGTTGATATTACATTGTGACCAACTGCTGCTACCCTGTATATACCTCCCCCTGTA  
>HPV57\_Alpha\_60882\_nt4048\_AOS|1  
CTTGTGGTTTCTACAATAGTTGATATTACATTGTGACCAACTGCTGCTACCCTGTATATA



>HPV69\_Alpha\_6970418\_nt7417\_AOS|1  
TGGCTCACCTACATTACTCACATATCTTTTAACAATAGTTGCATACGCACTTTTTTTTGA  
>HPV69\_Alpha\_6970418\_nt7409\_AOS|1  
CCTAGACGTGGCTCACCTACATTACTCACATATCTTTTAACAATAGTTGCATACGCACTT  
>HPV69\_Alpha\_6970418\_nt7402\_AOS|1  
TGGCTTGCCCTAGACGTGGCTCACCTACATTACTCACATATCTTTTAACAATAGTTGCATA  
>HPV69\_Alpha\_6970418\_nt6352\_AOS|1  
ACCAGTATCTATGTATATTAAAGGCGCTGGTCAAGGTCGTGAACCTCCAACCTACTTCTAT  
>HPV69\_Alpha\_6970418\_nt6345\_AOS|2  
ATTCTGTACCAGTATCTATGTATATTAAAGGCGCTGGTCAAGGTCGTGAACCTCCAACCTA  
>HPV69\_Alpha\_6970418\_nt6337\_AOS|1  
TATAGGTGATTCTGTACCAGTATCTATGTATATTAAAGGCGCTGGTCAAGGTCGTGAACC  
>HPV69\_Alpha\_6970418\_nt5350\_AOS|1  
TTTGATATACCTATATATAACGGCCCTGACATTTATGCTCCTGTACCTTCTTCCACATGG  
>HPV69\_Alpha\_6970418\_nt5309\_AOS|1  
GTAGTGCACCCTTAAATGTTACCATACCTCTATCTACATCATTTGATATACCTATATATA  
>HPV69\_Alpha\_6970418\_nt5302\_AOS|1  
ACCACTAGTAGTGCACCCTTAAATGTTACCATACCTCTATCTACATCATTTGATATACCT  
>HPV69\_Alpha\_6970418\_nt5295\_AOS|1  
ATTTTCAACCCTAGTAGTGCACCCTTAAATGTTACCATACCTCTATCTACATCATTTGA  
>HPV82\_Alpha\_6970427\_nt7511\_AOS|1  
ACCTATGTTTTTTGGCATAACCCTTAATTCTTTTGGCATGGTATGTACATCCCGCCCGCC  
>HPV82\_Alpha\_6970427\_nt4842\_AOS|1  
CCTCGTTTTATATAGCAGGGCATTTCACAGGTTAAGGTTACTAATCCAGACTTTTATTAGT  
>HPV82\_Alpha\_6970427\_nt4835\_AOS|1  
TGCTGCACCTCGTTTTATATAGCAGGGCATTTCACAGGTTAAGGTTACTAATCCAGACTT  
>HPV82\_Alpha\_6970427\_nt2884\_AOS|1  
GAGAAAGAAACATGCAAACCCTTAACCATCAAGTAGTACCAGCATCGGCAGTATCAAAAC  
>HPV82\_Alpha\_6970427\_nt2877\_AOS|1  
ACTGCACGAGAAAGAAACATGCAAACCCTTAACCATCAAGTAGTACCAGCATCGGCAGTA  
>HPV82\_Alpha\_6970427\_nt2869\_AOS|1  
TGTTTTTATACTGCACGAGAAAGAAACATGCAAACCCTTAACCATCAAGTAGTACCAGCAT  
>HPV82\_Alpha\_6970427\_nt1366\_AOS|1  
GAGCAGCGACAGAAGTACAGAGATAGACCTGGAAACAAACGAAAATGCTACCAATGTAGG  
>HPV82\_Alpha\_6970427\_nt503\_AOS|1  
CAGTGTGCAAATTGCAGAAAACCACCAAGACAACGTAGTGAAACCCAGGTGTAATAACGC  
>HPV82\_Alpha\_6970427\_nt493\_AOS|1  
CTGGACGGGACAGTGTGCAAATTGCAGAAAACCACCAAGACAACGTAGTGAAACCCAGGT  
>HPV68a\_Alpha\_71726685\_nt6285\_AOS|1  
GTAGGGGACACTATTCCCACTGACATGTATATTAAGGGCACTGACATTTCGTGAAACTCCT  
>HPV68a\_Alpha\_71726685\_nt6278\_AOS|1  
AGGCATGGTAGGGGACACTATTCCCACTGACATGTATATTAAGGGCACTGACATTTCGTGA  
>HPV68a\_Alpha\_71726685\_nt5355\_AOS|1  
AGTTGCCTTTAACACCCTCTACTCCAATTGATACAACCTTTGCCATAACTATATATGGTT  
>HPV68a\_Alpha\_71726685\_nt5347\_AOS|1  
AACCCACAGTTGCCTTTAACACCCTCTACTCCAATTGATACAACCTTTGCCATAACTAT  
>HPV68a\_Alpha\_71726685\_nt5329\_AOS|1  
TGTTGTATTACCATCTACAACCCACAGTTGCCTTTAACACCCTCTACTCCAATTGATAC  
>HPV68a\_Alpha\_71726685\_nt5209\_AOS|1  
ATTTACTACTCGTTCCACATATCAGTTCCTTCATTGGCTTCTGCTGCATCCACTACATA  
>HPV68a\_Alpha\_71726685\_nt5202\_AOS|1  
ATGCTACATTTACTACTCGTTCCACATATCAGTTCCTTCATTGGCTTCTGCTGCATCCA  
>HPV68a\_Alpha\_71726685\_nt5193\_AOS|1  
CATTTTCATAATGCTACATTTACTACTCGTTCCACATATCAGTTCCTTCATTGGCTTCTG  
>HPV68a\_Alpha\_71726685\_nt3453\_AOS|1

CAACGTGTCCGTGGACGGTGTGACCTCCCACTCCTCAGTAGAAGTGCAGGCCAAAACAA  
>HPV68a\_Alpha\_71726685\_nt1336\_AOS|1  
GTGAAAACCAGGATCCTAAATCACCTACTACCCAACCTAAAGTATTATTACAATGTAACA  
>HPV97\_Alpha\_71726694\_nt7616\_AOS|1  
CCTGTGCAACTACTTTTTACATCCAACAATCTGTCTACTCTTCTTATAAAGTATAAAATGA  
>HPV97\_Alpha\_71726694\_nt7417\_AOS|1  
TCTCACATACAATAGTCATACATATTTTCACCACTGGCACGTATTTTGGCGCACACTTTG  
>HPV97\_Alpha\_71726694\_nt7410\_AOS|1  
ATGTTAATCTCACATACAATAGTCATACATATTTTCACCACTGGCACGTATTTTGGCGCA  
>HPV97\_Alpha\_71726694\_nt6277\_AOS|1  
ACAGAGCTGGAACAATGGGTGACACTATTCCACAGGAGTTATATATTAAAGGAACTGGTA  
>HPV97\_Alpha\_71726694\_nt5350\_AOS|1  
TAGTACTTCTGTATGGCCTTTTATAACACCTACATCTACGTCCACGACACACTATATAGG  
>HPV97\_Alpha\_71726694\_nt5341\_AOS|1  
ATTACCTTCTAGTACTTCTGTATGGCCTTTTATAACACCTACATCTACGTCCACGACACA  
>HPV97\_Alpha\_71726694\_nt5334\_AOS|1  
ATATTGTATTACCTTCTAGTACTTCTGTATGGCCTTTTATAACACCTACATCTACGTCCA  
>HPV97\_Alpha\_71726694\_nt4890\_AOS|1  
CTGCCTTTAATCCTATTGACTCTACATTAACACTTTGAACCTACTAGTAATGTTCCCGATT  
>HPV97\_Alpha\_71726694\_nt3688\_AOS|1  
TATTAACGTAAATGTATGATAGTGAGCATCAACGAACCAATTTTGGATAGTGTTCCCTA  
>HPV97\_Alpha\_71726694\_nt3224\_AOS|1  
ACATGAAAGTAAAAAATATGGTAACAGTAATAAGTGGGAAGTGCATTTTGGGGGCGTTGT  
>HPV106\_Alpha\_71726710\_nt7526\_AOS|1  
ATTTATGTTGTGTAGTCCAGTCCTTGTGGCCCGGTCATGCATACCCCCGCCCTTATAACA  
>HPV106\_Alpha\_71726710\_nt7516\_AOS|1  
GTAACATACATTTATGTTGTGTAGTCCAGTCCTTGTGGCCCGGTCATGCATACCCCCGC  
>HPV106\_Alpha\_71726710\_nt7509\_AOS|1  
CTTGTGAGTAACATATACATTTATGTTGTGTAGTCCAGTCCTTGTGGCCCGGTCATGCATA  
>HPV106\_Alpha\_71726710\_nt6592\_AOS|2  
ATGTTCCGGAAGGGTTTTTACTAAAGGGGCCTACTACTACATCCCCGCGCCTCTGCTACAA  
>HPV106\_Alpha\_71726710\_nt5560\_AOS|2  
AGTATCGCACACTACTGTTCCCCTGTCTACAAGCTTTGATGTCCCTGTTTTTAGTGGCCC  
>HPV106\_Alpha\_71726710\_nt5552\_AOS|1  
GTCTCCACAGTATCGCACACTACTGTTCCCCTGTCTACAAGCTTTGATGTCCCTGTTTTT  
>HPV106\_Alpha\_71726710\_nt5545\_AOS|1  
ATCCACTGTCTCCACAGTATCGCACACTACTGTTCCCCTGTCTACAAGCTTTGATGTCCC  
>HPV106\_Alpha\_71726710\_nt5533\_AOS|1  
ATTGGCTGCATCATCCACTGTCTCCACAGTATCGCACACTACTGTTCCCCTGTCTACAAG  
>HPV106\_Alpha\_71726710\_nt5367\_AOS|1  
TAAGTCCAATTACTCCTGCTGAAGAGTTAGAAATGCAACCTCTGGTGTCTGACACCCCTA  
>HPV106\_Alpha\_71726710\_nt3874\_AOS|1  
GTGTATACTACACCCTGGAGATTTTTATTGCTGGCTATCTGTTTGGACACACCTGCTGC  
>HPV102\_Alpha\_71726718\_nt5688\_AOS|2  
CCCAATCTGTGTTTGTGGATGGTACAGACTATTTTTTATTGCCTAATTACTTATTCTTTC  
>HPV102\_Alpha\_71726718\_nt5655\_AOS|1  
TGCTGCATGTTTCCCAGTCCTCTAATGTTCCCTCCCAATCTGTGTTTGTGGATGGTACAG  
>HPV102\_Alpha\_71726718\_nt5456\_AOS|1  
AATGGCCACTTGGACTCCTTGGCGTCTCCACATGTTTCATATACTTCTTCCACGTCTGTT  
>HPV102\_Alpha\_71726718\_nt4263\_AOS|1  
GAGGCTTATGCACATGTAGACTCCTTACTGTGTTCCCTTTTGTATTCCCATACATTTTTGA  
>HPV102\_Alpha\_71726718\_nt4168\_AOS|1  
CCGTCCTATGATGTGATTGTTTTTGGGCAAGCTGATACTGGATTACTGTTAATAATTTTA  
>HPV102\_Alpha\_71726718\_nt4161\_AOS|1  
GGGGGGGCCGTCCTATGATGTGATTGTTTTTGGGCAAGCTGATACTGGATTACTGTTAAT

>HPV102\_Alpha\_71726718\_nt4146\_AOS|1  
ATTGGAAACACGACGGGGGGGCGTCCTATGATGTGATTGTTTTTGGGCAAGCTGATAC  
>HPV102\_Alpha\_71726718\_nt4139\_AOS|1  
TGTATCCATTGGAAACACGACGGGGGGGCGTCCTATGATGTGATTGTTTTTGGGCAAG  
>HPV102\_Alpha\_71726718\_nt3615\_AOS|1  
GTGCGGGGAGACAGCCACTAAAGCAACCTTTGTTACCTTGCGGTATAGCAGTGTAGAACA  
>HPV102\_Alpha\_71726718\_nt3406\_AOS|1  
AAACAACATCAAAAGCGGCTGGACACTAGTACCCACGGATTCTACGGTGACACTGAGTGC  
>HPV13\_Alpha\_85827580\_nt7631\_AOS|1  
TTGCTAGGGCGCGGTTATATATGTTTACTAAATCTTACTAATCTTTCTATCACTCATTTT  
>HPV13\_Alpha\_85827580\_nt7556\_AOS|1  
ACGCTGTTTATATAATCTTACCTACCGCCTGCCAAAATTATCCACCGCTTGCCAAAATCA  
>HPV13\_Alpha\_85827580\_nt4886\_AOS|1  
AAAGTGGTGACACAGTGTTTATATCGCCATCTACTATTTCCCCTCATTCTACAGAAGACA  
>HPV13\_Alpha\_85827580\_nt4879\_AOS|1  
TCTATTGAAAGTGGTGCACACGTGTTTATATCGCCATCTACTATTTCCCCTCATTCTACA  
>HPV13\_Alpha\_85827580\_nt4872\_AOS|1  
TCAACCTTCTATTGAAAGTGGTGCACACGTGTTTATATCGCCATCTACTATTTCCCCTCA  
>HPV13\_Alpha\_85827580\_nt4865\_AOS|1  
CACAATCTCAACCTTCTATTGAAAGTGGTGCACACAGTGTTTATATCGCCATCTACTATTT  
>HPV13\_Alpha\_85827580\_nt3968\_AOS|1  
TAATTGCACTTACAGTGTGTGTAGTTAGCATTATAACAATATTGTGGATATCAGAGTTTT  
>HPV2\_Alpha\_9626032\_nt4623\_AOS|1  
TTCGCGACCCACCCTGTAGTTGACATTGGTCCAACGCCCAGGCCGCTGTTATCATTGA  
>HPV2\_Alpha\_9626032\_nt4220\_AOS|2  
CATGATGATGTTCAATGTCTGTTGGTGATTCTTATCCTAATCGCCTTTTTATTGTTGATG  
>HPV2\_Alpha\_9626032\_nt4210\_AOS|1  
ACTGTGGGGTCATGATGATGTTCAATGTCTGTTGGTGATTCTTATCCTAATCGCCTTTTT  
>HPV2\_Alpha\_9626032\_nt4178\_AOS|1  
TATAAGGGATCTGAGGGAACATATCCTGTGGTACTGTGGGGTCATGATGATGTTCAATGT  
>HPV2\_Alpha\_9626032\_nt4105\_AOS|1  
CCATACGTTGCTGCTAGCTTGTATACATAGTCTATATACCCATTGTGTGAGATTTGCAAT  
>HPV2\_Alpha\_9626032\_nt4098\_AOS|1  
TATTTTCGCCATACGTTGCTGCTAGCTTGTATACATAGTCTATATACCCATTGTGTGAGAT  
>HPV2\_Alpha\_9626032\_nt4091\_AOS|1  
TCGTTATTATTTTCGCCATACGTTGCTGCTAGCTTGTATACATAGTCTATATACCCATTGT  
>HPV2\_Alpha\_9626032\_nt4084\_AOS|1  
ACCATAGTCGTTATTATTTTCGCCATACGTTGCTGCTAGCTTGTATACATAGTCTATATAC  
>HPV2\_Alpha\_9626032\_nt4077\_AOS|1  
GGTTTTTACCATAGTCGTTATTATTTTCGCCATACGTTGCTGCTAGCTTGTATACATAGTC  
>HPV41\_Nu\_9626041\_nt6645\_AOS|3  
TTCTAAGTTTTTTGAGTTTTTAAGGCACACCGAGGAGTTTCAGCTTGCCCTTTATTCTACA  
>HPV41\_Nu\_9626041\_nt6603\_AOS|2  
TACCATCAGTGTTCCCTGAGGGGGATGCTTCTTCATATAACAATTCTAAGTTTTTTGAGTT  
>HPV41\_Nu\_9626041\_nt3682\_AOS|1  
TAAGGTACAAATGGAAAAACAAGTATAGCGGTGACATAATGTATCTGGGGACTACTTTCA  
>HPV41\_Nu\_9626041\_nt3148\_AOS|1  
ATTATATTACACCAACAGATGAATGGTATAAAGCTAGAGGTGGCATTGATGACACTGGTA  
>HPV41\_Nu\_9626041\_nt2640\_AOS|1  
GGCAACCGTTATATTACATTGATGGTTATACATGGAACCTCTTTTTTTAGGAAATTTTGGC  
>HPV41\_Nu\_9626041\_nt2632\_AOS|1  
AGGAAATGGGCAACCGTTATATTACATTGATGGTTATACATGGAACCTCTTTTTTTAGGAA  
>HPV41\_Nu\_9626041\_nt2578\_AOS|1  
ATATCTGCAAACCAGAACAATGTATGTGTACTTTAACAAGCCATTTCTCTTAAAGGAAA  
>HPV41\_Nu\_9626041\_nt2569\_AOS|1

TGAATTCAAATATCTGCAAACCAGAACAAATGTATGTGTACTTTAACAAGCCATTTCTCTCT  
>HPV41\_Nu\_9626041\_nt2561\_AOS|1  
CGATTAGATGAATTCAAATATCTGCAAACCAGAACAAATGTATGTGTACTTTAACAAGCCA  
>HPV41\_Nu\_9626041\_nt1591\_AOS|1  
TAGTGAGATAAGTGCTATGGAGGTTTTGCTGCGACAACAATGCCAATTTTTTATACATTGA  
>HPV1\_Mu\_9626063\_nt7292\_AOS|1  
TTATTTGTTTAGACTCCGGTGCATTATACACAAGTGTGCATTTTTTGTGTTCTCTGATTG  
>HPV1\_Mu\_9626063\_nt7272\_AOS|1  
TATTCCAGATTGTTGAGGATTTATTTGTTTAGACTCCGGTGCATTATACACAAGTGTGCA  
>HPV1\_Mu\_9626063\_nt7265\_AOS|1  
CTGCATATATTCCAGATTGTTGAGGATTTATTTGTTTAGACTCCGGTGCATTATACACAA  
>HPV1\_Mu\_9626063\_nt6565\_AOS|2  
GTAAAGTAAAGTAACTCCCGAAAATCTAGCCTACATTCATACAATGGACCCTAATATTT  
>HPV1\_Mu\_9626063\_nt5769\_AOS|2  
GGAATAACGGGCCACCCTCTTTTAAATAAGTTAGATGATGCAGAAAATCCAACAAATTAT  
>HPV1\_Mu\_9626063\_nt5578\_AOS|2  
TTGAGATCTCCAGTAATCAAACGTAACTATACCAAAGTGTACCAAATGCATTTAGAG  
>HPV1\_Mu\_9626063\_nt5255\_AOS|1  
GATACTAGCTTGCATGTATATTACCCAAATCTTCTAAAGGGACTCCAATAATTAATCCT  
>HPV1\_Mu\_9626063\_nt5157\_AOS|1  
TGGGCGAAAATTTGCAACTTACTATTACTAACTCAGAGGGTGAGGTTTCTATACTAGATT  
>HPV1\_Mu\_9626063\_nt5119\_AOS|1  
ATATTCAGAAGAAGAGCTTTTAGACACAAACGAAAGTGTGGGCGAAAATTTGCAACTTAC  
>HPV1\_Mu\_9626063\_nt3748\_AOS|1  
TTTGCCAGATCAGTGTCTGTGTTTTTGGGACAGTTTAATGGGTCTTAAATTAATGGAA  
>HPV18\_Alpha\_9626069\_nt5352\_AOS|1  
ATTTTTTAAATATTCGCCCACTATATCTTCTGCCTCTTCCTATAGTAATGTAACGGTCCC  
>HPV18\_Alpha\_9626069\_nt5359\_AOS|1  
AAATATTCGCCCACTATATCTTCTGCCTCTTCCTATAGTAATGTAACGGTCCCTTTAAC  
>HPV18\_Alpha\_9626069\_nt5345\_AOS|1  
CCTTTGCATTTTTTAAATATTCGCCCACTATATCTTCTGCCTCTTCCTATAGTAATGTAA  
>HPV18\_Alpha\_9626069\_nt5338\_AOS|1  
ACTACCTCCTTTGCATTTTTTAAATATTCGCCCACTATATCTTCTGCCTCTTCCTATAGT  
>HPV18\_Alpha\_9626069\_nt5331\_AOS|1  
GCGTTCTACTACCTCCTTTGCATTTTTTAAATATTCGCCCACTATATCTTCTGCCTCTTC  
>HPV18\_Alpha\_9626069\_nt5324\_AOS|1  
TACCATCGCGTTCCTACTACCTCCTTTGCATTTTTTAAATATTCGCCCACTATATCTTCTG  
>HPV18\_Alpha\_9626069\_nt1507\_AOS|1  
GCACAATTAAAAGACTTGTTAAAAGTAAACAATAACAAGGAGCTATGTTAGCAGTATTT  
>HPV18\_Alpha\_9626069\_nt1479\_AOS|1  
AGAAAATGTAAATCCACAATGTACCATAGCACAATTAAAAGACTTGTTAAAAGTAAACAA  
>HPV4\_Gamma\_9626597\_nt6989\_AOS|1  
AATTATATAAGATTTGCAAACGTGTATGTATCTGTTTTTGTGAACTATAGTGAAATAAAC  
>HPV4\_Gamma\_9626597\_nt6804\_AOS|2  
TGGTTCCTCTAAAACGTAAAAGAATAATAAGTTCTTCTCATGCACAACTAATACCAAACG  
>HPV4\_Gamma\_9626597\_nt6192\_AOS|2  
TATTGGTGCTCAAAACCAACAAGATCAGTACACTTTAGGACCTCATATTTATGTAGGGAC  
>HPV4\_Gamma\_9626597\_nt5220\_AOS|2  
GCCATTTGTTCCCTCTAGAACCAGCTTTGTTATCTGATATATTTAGTACGGATTTTGTATA  
>HPV4\_Gamma\_9626597\_nt4544\_AOS|1  
ATCGTGCAATAGGAAGAGCACGGGATTTATATAATAGAAGGGTTCAGCAAATACCTACTA  
>HPV4\_Gamma\_9626597\_nt3693\_AOS|1  
GCTTTTGTAAAACACAACCTTTTTTCCTAAACTGTGTACATATACCTACGGCTCATTTGAAT  
>HPV4\_Gamma\_9626597\_nt3685\_AOS|1  
AAAGAGACGCTTTTGTAAAACACAACCTTTTTTCCTAAACTGTGTACATATACCTACGGCT

>HPV4\_Gamma\_9626597\_nt3678\_AOS|1  
ACTGACCAAAGAGACGCTTTTGTAAAACACAACCTTTTCTAACTGTGTACATATACC  
>HPV4\_Gamma\_9626597\_nt3670\_AOS|1  
TTGATAGCACTGACCAAAGAGACGCTTTTGTAAAACACAACCTTTTCTAACTGTGTA  
>HPV4\_Gamma\_9626597\_nt3649\_AOS|1  
ATAGTCGCATGCTTATTGCATTTGATAGCACTGACCAAAGAGACGCTTTTGTAAAACACA  
>HPV63\_Mu\_9626605\_nt6415\_AOS|2  
TAAATGTTCTTAACAAAGCAACCCCTGAGACTTATGATAGCGCAGATTATAATGAGTATA  
>HPV63\_Mu\_9626605\_nt6407\_AOS|1  
GATGAATATAAATGTTCTTAACAAAGCAACCCCTGAGACTTATGATAGCGCAGATTATAA  
>HPV63\_Mu\_9626605\_nt5232\_AOS|1  
TTGGATCACCTACTATAAATCCTACTGATCTTGACATTCCATTAATTATTATACATTTAG  
>HPV63\_Mu\_9626605\_nt5225\_AOS|1  
GCTAGTGTGGATCACCTACTATAAATCCTACTGATCTTGACATTCCATTAATTATTATA  
>HPV63\_Mu\_9626605\_nt4424\_AOS|1  
TTTATAGATGTAGATACGCCGGGTCAAATAGTAGGACAAGAAATACCACTAGTTAATTTT  
>HPV63\_Mu\_9626605\_nt4417\_AOS|1  
TAATATTTTATAGATGTAGATACGCCGGGTCAAATAGTAGGACAAGAAATACCACTAGT  
>HPV63\_Mu\_9626605\_nt3091\_AOS|1  
TGTTTTATTAGAATATGATGGTGTCAAAAACACTACTATGTTGACTTTCAAGAAGAGGCCA  
>HPV63\_Mu\_9626605\_nt3064\_AOS|1  
CAGCTAGTGATGTAGATGTTTCATGGTGTGTTTATTTAGAATATGATGGTGTCAAAAAC  
>HPV63\_Mu\_9626605\_nt3051\_AOS|1  
AGATGGAGAAAAGCAGCTAGTGATGTAGATGTTTCATGGTGTGTTTTATTTAGAATATGAT  
>HPV16\_Alpha\_9627100\_nt7744\_AOS|1  
CATAAGGTTTAACTTCTAAGGCCAACTAAATGTCACCCTAGTTCATACATGAACCTGTGT  
>HPV16\_Alpha\_9627100\_nt7072\_AOS|2  
ATTTACATTAGGAAAACGAAAAGCTACACCCACCACCTCATCTACCTCTACAACCTGCTAA  
>HPV16\_Alpha\_9627100\_nt6912\_AOS|1  
CTTGTCAAAAACATACACCTCCAGCACCTAAAGAAGATGATCCCCCTAAAAAATACACTT  
>HPV16\_Alpha\_9627100\_nt6893\_AOS|1  
TTTGTAAACCAGGCAATTGCTTGTCAAAAACATACACCTCCAGCACCTAAAGAAGATGAT  
>HPV16\_Alpha\_9627100\_nt6445\_AOS|1  
TGTACCAGACGATTTATACATTAAAGGCTCTGGGTCTACTGCAAATTTAGCCAGTTCAAA  
>HPV16\_Alpha\_9627100\_nt6437\_AOS|1  
GGTGA AAAATGTACCAGACGATTTATACATTAAAGGCTCTGGGTCTACTGCAAATTTAGCC  
>HPV16\_Alpha\_9627100\_nt5494\_AOS|1  
ACTGACCAAGCTCCTTCATTAATTCCTATAGTTCCAGGGTCTCCACAATATACAATTATT  
>HPV16\_Alpha\_9627100\_nt5487\_AOS|1  
TAATATAACTGACCAAGCTCCTTCATTAATTCCTATAGTTCCAGGGTCTCCACAATATAC  
>HPV16\_Alpha\_9627100\_nt3973\_AOS|1  
ATAATATTGGTATTACTATTGTGGATAACAGCAGCCTCTGCGTTTAGGTGTTTTATTGTA  
>HPV5\_Beta\_9627145\_nt5089\_AOS|1  
GTACTCCATTGCCACGCAATCAATCTGTAGGCCGTAGGAGGGGTTTCTCTTTGACTAATA  
>HPV5\_Beta\_9627145\_nt6974\_AOS|1  
TTTCAGTATTTCTGTATATAATCAGGCTGGAGCACTAAAAGATGTTGCAGACTATAATGC  
>HPV5\_Beta\_9627145\_nt5159\_AOS|1  
ACAGCAGGTACAAGTGGACAATCCATTGTTTCTAACTCAACCATCTAAGTTAGTTTCGTTT  
>HPV5\_Beta\_9627145\_nt4026\_AOS|1  
TGTC AAAGGGGCGGCTAACACACTGAAAAATGTCCGCAACAGAGCTAAAATTAAATACAT  
>HPV5\_Beta\_9627145\_nt4019\_AOS|1  
TAATCATTGTCAAAGGGGCGGCTAACACACTGAAAAATGTCCGCAACAGAGCTAAAATTA  
>HPV5\_Beta\_9627145\_nt2365\_AOS|1  
CCCTTTCAGAGTGCAAGATAGCTCTATTGGATGATGTAACAGACCCTTGTTGGATATACA  
>HPV5\_Beta\_9627145\_nt2174\_AOS|1

CCAAAATATAAACTTTATTGTATTCTTAAGTGCATTAAAAGAATTCTTACACTCAGTGCC  
>HPV5\_Beta\_9627145\_nt215\_AOS|1  
AACACCAACAGAACTGACAGAAAAAGATAAGGCAGAATTACCTTTAAGTATTAGAGACT  
>HPV5\_Beta\_9627145\_nt208\_AOS|1  
GGAGCCGAACACCAACAGAACTGACAGAAAAAGATAAGGCAGAATTACCTTTAAGTATT  
>HPV10\_Alpha\_9627257\_nt7080\_AOS|3  
TTTTGTCTCTTCAGCCATTACTTGTTCAGAAAGATACACCCCCACCGAGAAGCAGGATC  
>HPV10\_Alpha\_9627257\_nt6618\_AOS|3  
TTGGAGACGCCATCCCAGACACTTTCATATTAAAGAGCAACGGTGGGGGGCGAGACGTTG  
>HPV10\_Alpha\_9627257\_nt6609\_AOS|2  
CTAGTGCTGTTGGAGACGCCATCCCAGACACTTTCATATTAAAGAGCAACGGTGGGGGGC  
>HPV10\_Alpha\_9627257\_nt6600\_AOS|3  
TTAATCGGGCTAGTGCTGTTGGAGACGCCATCCCAGACACTTTCATATTAAAGAGCAACG  
>HPV10\_Alpha\_9627257\_nt5534\_AOS|1  
GTAGTACCACACAGTCCAGGGGATATAATACCACTTCCCCTTTGTCTTCTACACTTTCCA  
>HPV10\_Alpha\_9627257\_nt5527\_AOS|1  
GGATATCGTAGTACCACACAGTCCAGGGGATATAATACCACTTCCCCTTTGTCTTCTACA  
>HPV10\_Alpha\_9627257\_nt5520\_AOS|2  
TACAGAGGGATATCGTAGTACCACACAGTCCAGGGGATATAATACCACTTCCCCTTTGTC  
>HPV10\_Alpha\_9627257\_nt5513\_AOS|1  
TTGCTTTTACAGAGGGATATCGTAGTACCACACAGTCCAGGGGATATAATACCACTTCCC  
>HPV10\_Alpha\_9627257\_nt5506\_AOS|1  
GGTGATGTTGCTTTTACAGAGGGATATCGTAGTACCACACAGTCCAGGGGATATAATACC  
>HPV10\_Alpha\_9627257\_nt5499\_AOS|1  
TGATGATGGTGATGTTGCTTTTACAGAGGGATATCGTAGTACCACACAGTCCAGGGGATA  
>HPV26\_Alpha\_9627305\_nt7307\_AOS|1  
TATTTGTCATTTGTTTTACCCCTGAGGTAATGGGAGGAACCTTAGGTGGTGTCCTTATA  
>HPV26\_Alpha\_9627305\_nt7291\_AOS|1  
CATGTCTTTACTACACTATTTGTTCATTTGTTTTACCCCTGAGGTAATGGGAGGAACCTTA  
>HPV26\_Alpha\_9627305\_nt7283\_AOS|1  
CATGGTTACATGTCTTTACTACACTATTTGTTCATTTGTTTTACCCCTGAGGTAATGGGAG  
>HPV26\_Alpha\_9627305\_nt7275\_AOS|1  
TCTTCATGCATGGTTACATGTCTTTACTACACTATTTGTTCATTTGTTTTACCCCTGAGGT  
>HPV26\_Alpha\_9627305\_nt5390\_AOS|1  
ATCCACCTCATTTGAACTACCTGTATATAGTGGGTCAGACATTTACACGCCCACATCTTC  
>HPV26\_Alpha\_9627305\_nt5377\_AOS|1  
TTACTGTGCCTTTATCCACCTCATTTGAACTACCTGTATATAGTGGGTCAGACATTTACA  
>HPV26\_Alpha\_9627305\_nt5316\_AOS|1  
TTACCAGTTCCAAGATATGCCTCCAATGTGTTTTCTCTATTAATACTTCCACTACCAAT  
>HPV26\_Alpha\_9627305\_nt5309\_AOS|1  
TACAACATTACCAGTTCCAAGATATGCCTCCAATGTGTTTTCTCTATTAATACTTCCAC  
>HPV26\_Alpha\_9627305\_nt5302\_AOS|1  
ATCCCCCTACAACATTACCAGTTCCAAGATATGCCTCCAATGTGTTTTCTCTATTAATA  
>HPV26\_Alpha\_9627305\_nt5291\_AOS|1  
GCGCATGTCATATCCCCTACAACATTACCAGTTCCAAGATATGCCTCCAATGTGTTTTCT  
>HPV32\_Alpha\_9627327\_nt7703\_AOS|1  
GCATAGCTTTGCATTTACTTATTTCTCTTCTCCTTTGTTTCATGTTATGACTACTGTATTT  
>HPV32\_Alpha\_9627327\_nt7687\_AOS|1  
TGTTTTAGAAAGGTTGGCATAGCTTTGCATTTACTTATTTCTCTTCTCCTTTGTTTCATGT  
>HPV32\_Alpha\_9627327\_nt4954\_AOS|1  
ATACAGTGATCCCTTTTACTTTACGGCCTTCTTTGCCAGTAGAGGGTAATGGTAGACTCTT  
>HPV32\_Alpha\_9627327\_nt4946\_AOS|1  
AATCCAGTATACAGTGATCCTTTTACTTTACGGCCTTCTTTGCCAGTAGAGGGTAATGGT  
>HPV32\_Alpha\_9627327\_nt4927\_AOS|1  
TGCATCTACTACGTCCCAATCCAGTATACAGTGATCCTTTTACTTTACGGCCTTCTTT

>HPV32\_Alpha\_9627327\_nt4909\_AOS|1  
CACCAATACTATAAGGGTTGCATCTACTACGTCCCACAATCCAGTATACAGTGATCCTTT  
>HPV32\_Alpha\_9627327\_nt4313\_AOS|1  
ATGGCGATGTGTGGCTGCTGCTGTGGTTTTTAGCCACAGTGTTTATTTGTATATTAGTAC  
>HPV32\_Alpha\_9627327\_nt4298\_AOS|1  
ATTGTACTTTAGAAAATGGCGATGTGTGGCTGCTGCTGTGGTTTTTAGCCACAGTGTTTA  
>HPV32\_Alpha\_9627327\_nt4289\_AOS|1  
ATATGGTACATTGTACTTTAGAAAATGGCGATGTGTGGCTGCTGCTGTGGTTTTTAGCCA  
>HPV32\_Alpha\_9627327\_nt4282\_AOS|1  
CGTGATAATATGGTACATTGTACTTTAGAAAATGGCGATGTGTGGCTGCTGCTGTGGTTT  
>HPV34\_Alpha\_9627334\_nt7302\_AOS|1  
TTCGGTTGCCTATACTATAACATGTTTTGGTCTGTTTGTGCTGTTTTAGCACAAAGGTTT  
>HPV34\_Alpha\_9627334\_nt4466\_AOS|1  
TGCCAGGTCCTACCTCCATAGTGCCTTCTAGTTCTGGATTTAATGTAACAACATCTGTGG  
>HPV34\_Alpha\_9627334\_nt4457\_AOS|1  
AAGCTGGTGTGCCAGGTCCTACCTCCATAGTGCCTTCTAGTTCTGGATTTAATGTAACAA  
>HPV34\_Alpha\_9627334\_nt4338\_AOS|1  
AACTACTCCATCTAGACCAGTTGAAATTCCTTTGCAACCTACCAGACCTCCTGTTATTAC  
>HPV34\_Alpha\_9627334\_nt4325\_AOS|1  
TGCCATTACCCACAACCTACTCCATCTAGACCAGTTGAAATTCCTTTGCAACCTACCAGAC  
>HPV34\_Alpha\_9627334\_nt4316\_AOS|1  
CAGGATATGTGCCATTACCCACAACCTACTCCATCTAGACCAGTTGAAATTCCTTTGCAAC  
>HPV34\_Alpha\_9627334\_nt3909\_AOS|1  
ATGCATGGTTATTGCTTTTGGATTATAATTACTTTTTTACATGTGTCCCAATCCCTGTAA  
>HPV34\_Alpha\_9627334\_nt3138\_AOS|1  
CATTTGTGTATTATTGGTTGGAAGGCAAGTGGTATAAAGTGAGTAGCCATGTAGATTATA  
>HPV34\_Alpha\_9627334\_nt739\_AOS|1  
GTGTGTCTTACCATTGAGAGCACACACGCTGACCTATTAGTGTTAGAAGACCTGCTTATG  
>HPV34\_Alpha\_9627334\_nt317\_AOS|1  
AAGGTTAGACAATATAGAAGATATAACCAATCAGTGTATGGACGGACGTTAGAGAATTTA  
>HPV49\_Beta\_9627363\_nt7123\_AOS|1  
ATGCCCTGACAAACAACCTGCTCCAGAAAGGAAAGATCCATATGAGCAGTATAACTTTTG  
>HPV49\_Beta\_9627363\_nt6649\_AOS|2  
TAACAATTACATATTACCTGCAGCAAGTCAACAGGCCCAAATACTCTTGGCAGCTCCAT  
>HPV49\_Beta\_9627363\_nt6639\_AOS|1  
TAGGTCAGGATAACAATTACATATTACCTGCAGCAAGTCAACAGGCCCAAATACTCTTG  
>HPV49\_Beta\_9627363\_nt5574\_AOS|1  
CCACATTTACTGTACCCCGCTTCTCTACTCCCAGATCTGATACCTTTTATGTACAAGATT  
>HPV49\_Beta\_9627363\_nt470\_AOS|1  
TTGCTGAGATAGTAGTCAGATGTCTCATTTGCCTTAAGAGGCTAGATTTGTTGAAAAGC  
>HPV49\_Beta\_9627363\_nt413\_AOS|1  
ATTATCACCAAGAAATTGTCGTAGGCATCGAAATAGAAGGACGAGCAGCGGCTAATATTG  
>HPV49\_Beta\_9627363\_nt406\_AOS|1  
TTTACTAATTATCACCAAGAAATTGTCGTAGGCATCGAAATAGAAGGACGAGCAGCGGCT  
>HPV53\_Alpha\_9627377\_nt7601\_AOS|1  
TTTAATGTTTTTTTGTTTTATACACTATGCCTTACCTATTAGTCACTTACTGTAGGCTGC  
>HPV53\_Alpha\_9627377\_nt7445\_AOS|1  
ACATATAGTATAGCTTATAGGTATCCATTTTAGTTTGGCGCCTTTTTGGTACCCTCCATT  
>HPV53\_Alpha\_9627377\_nt7121\_AOS|1  
TCAGCCCCCTCCTCCAAGCGCAAACGCAAATAGTATGTTGTGTGTCTGTATTGTGTATGT  
>HPV53\_Alpha\_9627377\_nt7114\_AOS|1  
ATCTACCTCAGCCCCCTCCTCCAAGCGCAAACGCAAATAGTATGTTGTGTGTCTGTATTG  
>HPV53\_Alpha\_9627377\_nt7106\_AOS|1  
TCTACTACATCTACCTCAGCCCCCTCCTCCAAGCGCAAACGCAAATAGTATGTTGTGTGT  
>HPV53\_Alpha\_9627377\_nt5495\_AOS|1

ATGTAGTGTGCCCCACAGGACCCCCCTACATGGCCTTATGCACCTCAATCTCCTTTTGATA  
>HPV53\_Alpha\_9627377\_nt1374\_AOS|1  
AGGGTCAGGAAGTGATATGGATGTGGATAGACAGGATATAATGCCACTGCAACAAATACA  
>HPV53\_Alpha\_9627377\_nt1003\_AOS|1  
AGGAAAGCACCGAATCTGATTTGGATGGGTTTATAGACAATAGTAATATAATATCTACAC  
>HPV53\_Alpha\_9627377\_nt996\_AOS|1  
ACAGACGAGGAAAGCACCGAATCTGATTTGGATGGGTTTATAGACAATAGTAATATAATA  
>HPV53\_Alpha\_9627377\_nt304\_AOS|1  
ATTCTGTTTGTCTATTTTATAGTAAGGTCCGAAAATTAAGATATTACAATTGTTTCAGTGTA  
>HPV7\_Alpha\_9627389\_nt7661\_AOS|1  
TATAAATCCTTCAATTTCCACCCATAACCGTTTCCAGTCTCGGTTGGCAAGTCACCATGT  
>HPV7\_Alpha\_9627389\_nt7654\_AOS|1  
ATAACTATATAAATCCTTCAATTTCCACCCATAACCGTTTCCAGTCTCGGTTGGCAAGTC  
>HPV7\_Alpha\_9627389\_nt5532\_AOS|1  
AATAATACACCAACTTCTACCTATTCTTGTATCCAGGTAATTCTACACGCATAGCAAAT  
>HPV7\_Alpha\_9627389\_nt4044\_AOS|1  
TGCATGCATATACCTGATTTCTGTGTCTGGAGCTCTTTGATGGCCACTATTTCTATTCTT  
>HPV7\_Alpha\_9627389\_nt3461\_AOS|1  
TATACAACGACAGCCACGCACCGCCCCGAAAGCAAGGAGAGACGGAGACTTGTCCATCA  
>HPV7\_Alpha\_9627389\_nt1393\_AOS|1  
AAGTGCTAGAAGAAAGCAGTGATGTTATACAGCAACTTAGTCCGCGTACACAGGTGGTAG  
>HPV7\_Alpha\_9627389\_nt1375\_AOS|1  
TTGAAACGGAAGCGGTTGAAGTGCTAGAAGAAAGCAGTGATGTTATACAGCAACTTAGTC  
>HPV7\_Alpha\_9627389\_nt1368\_AOS|1  
GCGACAGTTGAAACGGAAGCGGTTGAAGTGCTAGAAGAAAGCAGTGATGTTATACAGCAA  
>HPV7\_Alpha\_9627389\_nt1360\_AOS|2  
GGAGGGCTGCGACAGTTGAAACGGAAGCGGTTGAAGTGCTAGAAGAAAGCAGTGATGTTA  
>HPV7\_Alpha\_9627389\_nt1343\_AOS|1  
TATAGAGGGGGCAGTGGGAGGGCTGCGACAGTTGAAACGGAAGCGGTTGAAGTGCTAGA  
>HPV9\_Beta\_9627396\_nt7206\_AOS|1  
GAAAACGTCCTATTAAAACATCTGTTAAAACATCTAAAAATGCTAAGAGAAGGCGAACCT  
>HPV9\_Beta\_9627396\_nt6606\_AOS|1  
AAAGTGATCAACAACAACGAACAATAGCTAATTCCACCTACTATCCTACAGTAAGTGGGT  
>HPV9\_Beta\_9627396\_nt6591\_AOS|1  
TCTTTTTTGCCAGCAAAAAGTGATCAACAACAACGAACAATAGCTAATTCCACCTACTATC  
>HPV9\_Beta\_9627396\_nt4763\_AOS|1  
TGGGGGCCAGCTAGTAGGTGGTCCTAGGGAATCATACACAGCATCTTCTGAAAACATAGA  
>HPV9\_Beta\_9627396\_nt3918\_AOS|1  
TAGGGGAAGACAGTTGTGATAGAGTTGGAAGAGCGGAATGATTTTAGCCTTTGACACAT  
>HPV9\_Beta\_9627396\_nt3831\_AOS|1  
ACGCCAATGTGCTTAAGTGCTATCGCTTTCGGGAACGCAAAAAAAAAAGAGGCTTAGTAA  
>HPV9\_Beta\_9627396\_nt825\_AOS|1  
CTTGCTACAAATTTAGGAATTCGAGCGCAACAGGAACCTTTTGCTGGGTGATATACAACTG  
>HPV9\_Beta\_9627396\_nt789\_AOS|1  
GGCTGTGGTTGCGGTGCAAGACTTCGTTTATACGTGCTTGCTACAAATTTAGGAATTCGA  
>HPV9\_Beta\_9627396\_nt768\_AOS|1  
ACTCCCTACAAGATCGTAGCTGGCTGTGGTTGCGGTGCAAGACTTCGTTTATACGTGCTT  
>HPV54\_Alpha\_9628437\_nt7521\_AOS|1  
CAGAACAACCTCACTTTCCATTGTGTAAAAACACGCCCTTTGCATTCCAACATTGATTTA  
>HPV54\_Alpha\_9628437\_nt7511\_AOS|1  
TTATAACTGTGCAACAACCTCACTTTCCATTGTGTAAAAACACGCCCTTTGCATTCCAA  
>HPV54\_Alpha\_9628437\_nt4184\_AOS|1  
ATAAATATTGTGTAGATATATTTGTGTATTATGGCTAAAGCAAGAGCCCCACGCCGAAA  
>HPV54\_Alpha\_9628437\_nt3162\_AOS|1  
GAACACAAAAGTGATTATGTGGATTTTAAAAAGGAAGCATCTAAGTATGGGGAATATGGA



>HPV54\_Alpha\_9628437\_nt3153\_AOS|1  
ATGGATGCAGAACACAAAGTGTATTATGTGGATTTTAAAAAGGAAGCATCTAAGTATGGG  
>HPV54\_Alpha\_9628437\_nt2990\_AOS|1  
TGGTTGCTTAAAAAGACGTGGACAAACAGTAGATGTTATATTTGATGGGCATCAGGATAA  
>HPV54\_Alpha\_9628437\_nt1334\_AOS|1  
GATAGCCTAGGAAGGCAGCAAATTACAGAATTAATACATAACACAAATATTCGTGTAGCA  
>HPV54\_Alpha\_9628437\_nt1315\_AOS|1  
ATCTGGGGAAACAACACTACAGATAGCCTAGGAAGGCAGCAAATTACAGAATTAATACATAA  
>HPV54\_Alpha\_9628437\_nt201\_AOS|1  
TTTGCAAGAAGACGGTGTGTACAGCAGAGATTTATGCATTTCAATATAAGGACCTATTTG  
>HPV24\_Unclassified\_9628486\_nt6245\_AOS|1  
TGGTGATAATAATGATGCTGGTAGATGTCCACCTATTAAGTTAGTAAATTCAGTAATTCA  
>HPV24\_Unclassified\_9628486\_nt6237\_AOS|2  
AGGTGTGCTGGTGATAATAATGATGCTGGTAGATGTCCACCTATTAAGTTAGTAAATTC  
>HPV24\_Unclassified\_9628486\_nt1745\_AOS|1  
CAAATGCTGCTACCTTTACACATGGGTCTTATCCTAAATGGATTATAGAACAAACACTGA  
>HPV24\_Unclassified\_9628486\_nt1629\_AOS|1  
ACAAACTGTTATAAGGTTATTAGTGTCTATGTTATATGTGGCAGAGGAGCAAATTTTATC  
>HPV24\_Unclassified\_9628486\_nt1571\_AOS|1  
TTACAGAAATGTCTGCAATGTTTTTATATCTGTTGTGTTTCAAGGCTGGCAAAAATAGAC  
>HPV24\_Unclassified\_9628486\_nt441\_AOS|1  
GATAGGTTGGGAAATAGAACAAAAAGAAAATACACCTCTTTTCGGACATTATTGTAAGGTG  
>HPV24\_Unclassified\_9628486\_nt434\_AOS|1  
AGAGTGTGATAGGTTGGGAAATAGAACAAAAAGAAAATACACCTCTTTTCGGACATTATTG  
>HPV24\_Unclassified\_9628486\_nt427\_AOS|1  
TTTGTAGAGAGTGTGATAGGTTGGGAAATAGAACAAAAAGAAAATACACCTCTTTTCGGAC  
>HPV24\_Unclassified\_9628486\_nt419\_AOS|1  
AAAATTATTTTGTAGAGAGTGTGATAGGTTGGGAAATAGAACAAAAAGAAAATACACCTC  
>HPV24\_Unclassified\_9628486\_nt193\_AOS|1  
ATCTTGATGGCTCAACCAGGTAAACCTCAGTCAGTGTTAGAACTTAGTAGATTATTAAAT  
>HPV48\_Gamma\_9628542\_nt6713\_AOS|1  
AGATCTACAAAGCGTAGGAGAGTAAGATAGTAAAGATGTAGAATGTTTACATTATTAATA  
>HPV48\_Gamma\_9628542\_nt5284\_AOS|1  
CGTGCAAGAAACGGATGTATATTTTTTATACAAGCACTGAAAGACTTTTAATAGTTGGTAA  
>HPV48\_Gamma\_9628542\_nt5113\_AOS|1  
TTATTTGATAGTTACTCAGACTTTGCTTTAGATCCCTTTTTTTATTCCACGTAAGAAACGA  
>HPV48\_Gamma\_9628542\_nt5101\_AOS|1  
AATTGGTTCCCTTTATTTGATAGTTACTCAGACTTTGCTTTAGATCCCTTTTTTTATTCCA  
>HPV48\_Gamma\_9628542\_nt4718\_AOS|1  
TAACTATAGGCCCTAAAGTACATTATTATATGGATTTGTCTGCAATATCAACAGAAGCTA  
>HPV48\_Gamma\_9628542\_nt4228\_AOS|1  
GATTCTTATACACAACTATCTTGCAAACACAGGTAAACCCATTTTTAAATAATGCTATT  
>HPV48\_Gamma\_9628542\_nt4217\_AOS|1  
AGTTGTTTTATGATTCTTATACACAACTATCTTGCAAACACAGGTAAACCCATTTTTTAA  
>HPV48\_Gamma\_9628542\_nt2990\_AOS|1  
GATCTAAATGGTGATTTTGTATACTTTACTTTATTTCAACCTGATGCTGTAAAATATGGA  
>HPV48\_Gamma\_9628542\_nt2327\_AOS|1  
TAACAACTGATGAATCTCTATTTTATTTGAGAAGTAGACTTACGTGTTTCAATTTTCCGA  
>HPV48\_Gamma\_9628542\_nt2319\_AOS|1  
TGTTAATGTAACAACCTGATGAATCTCTATTTTATTTGAGAAGTAGACTTACGTGTTTCAA  
>HPV50\_Gamma\_9628550\_nt6292\_AOS|1  
AAGAAAGATGTCAATCCTTTGGATCCTTTAAATGTAGCAAGTTCTTATATGTACTCAAAG  
>HPV50\_Gamma\_9628550\_nt5145\_AOS|1  
TGTTTTAGATTATTCAGATTATGATTTACATCCAGGTCTTCTTCCAAAAAGAAGACGCAT  
>HPV50\_Gamma\_9628550\_nt5096\_AOS|1

TAGATGCATCCTTGATAGTAAAATCAAATGTTTCTGAACAGCCCCCTTTTGTTTTAGATT  
>HPV50\_Gamma\_9628550\_nt4938\_AOS|1  
CGATGTTGAACATAATTTTACAGAGTCTCATTTAGTTATACCAGCTACTGATGAAGAAAA  
>HPV50\_Gamma\_9628550\_nt4929\_AOS|1  
ATTAACAGACGATGTTGAACATAATTTTACAGAGTCTCATTTAGTTATACCAGCTACTGA  
>HPV50\_Gamma\_9628550\_nt4274\_AOS|1  
TTAATCCCTTCATAAATCCAGACATAAATAATGTTAATGTATTAGTTGACCCAGCTTTG  
>HPV50\_Gamma\_9628550\_nt4251\_AOS|1  
AGCAGCAACTTTTGAAACACAGATTAATCCCTTCATAAATCCAGACATAAATAATGTTAA  
>HPV50\_Gamma\_9628550\_nt4244\_AOS|1  
CTACTATAGCAGCAACTTTTGAAACACAGATTAATCCCTTCATAAATCCAGACATAAATA  
>HPV50\_Gamma\_9628550\_nt1337\_AOS|1  
GTACACAAAATTGGATTATTGTAGTTTTTGCCGTGTCAGAAGATTTAATTGAAGCTTCTA  
>HPV60\_Gamma\_9628566\_nt5555\_AOS|1  
AGACAGTGGTTCAAATAATATTACTGTACCTAAATGTAGTGGAAATCAGTTTAGAGTTAT  
>HPV60\_Gamma\_9628566\_nt5049\_AOS|1  
AAACTACAAATGAAGGCCTAATACCTGACAATATACTAGAGGATGAATTTACAGAAAAC  
>HPV60\_Gamma\_9628566\_nt5042\_AOS|1  
TTAACTGAACTACAAATGAAGGCCTAATACCTGACAATATACTAGAGGATGAATTTACA  
>HPV60\_Gamma\_9628566\_nt4903\_AOS|1  
AACTATTGGTCAGAAAGTTCACCTTTTATTTTGATATTAGTGATATTCAGCTGCAGAAAC  
>HPV60\_Gamma\_9628566\_nt3700\_AOS|2  
ATACCACACAACGAGATGTTTTTATGAAATTAGTAACTTTGCCAAGAGGTTGTACATATA  
>HPV60\_Gamma\_9628566\_nt3684\_AOS|1  
TTAGTTGTTTTTAATGATACCACACAACGAGATGTTTTTATGAAATTAGTAACTTTGCCA  
>HPV60\_Gamma\_9628566\_nt3659\_AOS|1  
ACCAGAATCTTCTAGACATAAATTGTTAGTTGTTTTTAATGATACCACACAACGAGATGT  
>HPV60\_Gamma\_9628566\_nt3650\_AOS|1  
CATAGACGTACCAGAATCTTCTAGACATAAATTGTTAGTTGTTTTTAATGATACCACACA  
>HPV61\_Alpha\_9628574\_nt7738\_AOS|1  
GTGTTTGACAGGTTGCTAACACACACAGTTTGAACAATGCTCCATCTATCTTTTTTGAC  
>HPV61\_Alpha\_9628574\_nt7533\_AOS|1  
TATTGTTGCACGCCTTATTTTGTGCAGCTTCCCCATTTCTGTGTTCCCTGTGTTCCGGTA  
>HPV61\_Alpha\_9628574\_nt4298\_AOS|1  
AATACTGTTGTACAGGCTTTTACATTAGGTGGTGTACCTTGTGTGTTTTCCCTCCCCACA  
>HPV61\_Alpha\_9628574\_nt4291\_AOS|1  
TTATTGCAATACTGTTGTACAGGCTTTTACATTAGGTGGTGTACCTTGTGTGTTTTCCCT  
>HPV61\_Alpha\_9628574\_nt4243\_AOS|1  
TGGATCAGCAAACTGCGGATTGTTATTTTTGTTTTTGCTATTACTGCTTATTGCAATAC  
>HPV61\_Alpha\_9628574\_nt4234\_AOS|1  
TACTGGTTGTGGATCAGCAAACTGCGGATTGTTATTTTTGTTTTTGCTATTACTGCTTA  
>HPV61\_Alpha\_9628574\_nt4221\_AOS|1  
CAGGGGTTTGCACTTACTGGTTGTGGATCAGCAAACTGCGGATTGTTATTTTTGTTTTTG  
>HPV61\_Alpha\_9628574\_nt4187\_AOS|1  
TTGCAATATGTATCCCCTTGTAGTTAGTTCCCCTCAGGGGTTTGCACTTACTGGTTGTGGA  
>HPV61\_Alpha\_9628574\_nt3134\_AOS|1  
CAGAACTGATCTGTGGTATAAGGTTCCCTGGAAAAGTGTCATATAAGGGCCTATATTATG  
>HPV61\_Alpha\_9628574\_nt3127\_AOS|1  
CAAAGCACAGAACTGATCTGTGGTATAAGGTTCCCTGGAAAAGTGTCATATAAGGGCCTA  
>HPV20\_Beta\_1020162\_nt7671\_AOS\_rc|1  
TCTTCTGCTGTGCCAAAAAGAAGAGCCAAAAGCGTTGGCAGCCTTACATTTCTCCTGTT  
>HPV20\_Beta\_1020162\_nt7644\_AOS\_rc|1  
AAAAGCGTTGGCAGCCTTACATTTCTCCTGTTCCGAACGTGTTGGGACGATGAAGTTTG  
>HPV20\_Beta\_1020162\_nt5062\_AOS\_rc|1  
TTCTGTTAGTAAGGCCTCCTCTACGCCTGAACACATTTTGAAGTCTTTGCATAGGTGTGC

>HPV20\_Beta\_1020162\_nt4799\_AOS\_rc|1  
GTGCGGCTGACTCTGACACGAGCTGGAGGTGTTGGTCTGGTGCTACCTCTAGAACTGCA  
>HPV20\_Beta\_1020162\_nt4740\_AOS\_rc|1  
ACTAGAACCACCTGGTAGTAGATGTAAGTGGTGTATCAGTTGGTGGCCTTGAGGGGCCTGG  
>HPV20\_Beta\_1020162\_nt4733\_AOS\_rc|1  
CCACTGGTAGTAGATGTAAGTGGTGTATCAGTTGGTGGCCTTGAGGGGCCTGGATGTATT  
>HPV20\_Beta\_1020162\_nt217\_AOS\_rc|1  
TAAGATTGGAGGTTTTGCCTCTCCAATATTAGATGGTCCTTCATCAGCGCTGTCTTCTGA  
>HPV20\_Beta\_1020162\_nt179\_AOS\_rc|1  
CTTCATCAGCGCTGTCTTCTGAAGAAGGAGGTGTAGCCATGTGCCTGCACTCTCTGCATT  
>HPV20\_Beta\_1020162\_nt170\_AOS\_rc|1  
CGCTGTCTTCTGAAGAAGGAGGTGTAGCCATGTGCCTGCACTCTCTGCATTAGCTCTATG  
>HPV20\_Beta\_1020162\_nt155\_AOS\_rc|1  
AAGGAGGTGTAGCCATGTGCCTGCACTCTCTGCATTAGCTCTATGATATCTGTCTATATG  
>HPV21\_Beta\_1020170\_nt7013\_AOS\_rc|3  
AAATATTCTTGAAAGCTCTCGGCTTTATAATTTTCAATTTTAGACACGTCTGCATTCTCA  
>HPV21\_Beta\_1020170\_nt7006\_AOS\_rc|2  
CTTGAAAGCTCTCGGCTTTATAATTTTCAATTTTAGACACGTCTGCATTCTCAGGATTTA  
>HPV21\_Beta\_1020170\_nt6999\_AOS\_rc|2  
GCTCTCGGCTTTATAATTTTCAATTTTAGACACGTCTGCATTCTCAGGATTTACTGAAAT  
>HPV21\_Beta\_1020170\_nt5549\_AOS\_rc|1  
TCTGAATGTGCACTAAAATCTTCAGAAAGAGGGTTTTTCATCAACGTTAATATCAATAAAT  
>HPV21\_Beta\_1020170\_nt5162\_AOS\_rc|1  
AACTGCACTAATCTAGAAGGCCTGGATACAAACAAAGGATTCTCTACATTAACCTGTTGA  
>HPV21\_Beta\_1020170\_nt282\_AOS\_rc|1  
AATGGTATCTCTAACAGATTGGCTAGGTCACGAATTGTAGCTGGTAATGGTGGCTCTAAA  
>HPV21\_Beta\_1020170\_nt273\_AOS\_rc|1  
TCTAACAGATTGGCTAGGTCACGAATTGTAGCTGGTAATGGTGGCTCTAAAAAGCTAGAT  
>HPV21\_Beta\_1020170\_nt266\_AOS\_rc|1  
GATTGGCTAGGTCACGAATTGTAGCTGGTAATGGTGGCTCTAAAAAGCTAGATGTATTTT  
>HPV21\_Beta\_1020170\_nt257\_AOS\_rc|1  
GGTCACGAATTGTAGCTGGTAATGGTGGCTCTAAAAAGCTAGATGTATTTTCTTCTCTA  
>HPV22\_Beta\_1020178\_nt6715\_AOS\_rc|1  
GGCGCATAAATTCTCTGATTTTTTTAGCATCATAATTAAGTGTGGTGCCGTCACCTTGCCA  
>HPV22\_Beta\_1020178\_nt3899\_AOS\_rc|1  
CATTTGTTGCAAGCACTTCTCTCTTTCCCTATCTGTATGAAATGATATTAGTATCCTAGA  
>HPV22\_Beta\_1020178\_nt3889\_AOS\_rc|1  
AAGCACTTCTCTCTTTCCCTATCTGTATGAAATGATATTAGTATCCTAGAGCGCCCGATT  
>HPV22\_Beta\_1020178\_nt3877\_AOS\_rc|1  
CTTTCCCTATCTGTATGAAATGATATTAGTATCCTAGAGCGCCCGATTCTATCGGTTGTA  
>HPV22\_Beta\_1020178\_nt845\_AOS\_rc|1  
CACAAAAGTTTTACAGGTCCAAGTAGAGATGTTTGAAAGTCGCGAATTCCAGAGAGAGTT  
>HPV22\_Beta\_1020178\_nt837\_AOS\_rc|1  
TTTTACAGGTCCAAGTAGAGATGTTTGAAAGTCGCGAATTCCAGAGAGAGTTGCTAGTAT  
>HPV22\_Beta\_1020178\_nt413\_AOS\_rc|1  
CACGACCATACAAAGTAACCTTGATAATACTGCTGAAATTCAAATTGGGCTGAAGCGTAGG  
>HPV22\_Beta\_1020178\_nt406\_AOS\_rc|1  
ATACAAAGTAACCTTGATAATACTGCTGAAATTCAAATTGGGCTGAAGCGTAGGCACAGCC  
>HPV22\_Beta\_1020178\_nt181\_AOS\_rc|1  
CAGTGGTCTTTGCAAAGCCATGAATACAGAATAGCAGCCCATCCTACTTAAATAATATGC  
>HPV23\_Beta\_1020186\_nt5544\_AOS\_rc|1  
TAAGTAATAATCAAAAGACTTGTCCAATGTGTGTATGACTACAGCAGGGGCACTAGGTAA  
>HPV23\_Beta\_1020186\_nt5536\_AOS\_rc|1  
AATCAAAAGACTTGTCCAATGTGTGTATGACTACAGCAGGGGCACTAGGTAAAGGGAAATA  
>HPV23\_Beta\_1020186\_nt5529\_AOS\_rc|1

AGACTTGTCCAATGTGTGTATGACTACAGCAGGGGCACTAGGTAAGGGAAATATTATAGT  
>HPV23\_Beta\_1020186\_nt5258\_AOS\_rc|1  
GTATCCTGAATAGCCTCAACATCATCTAAGTTCATATCTATTACAGTGCTTTGCAGAGGT  
>HPV23\_Beta\_1020186\_nt5246\_AOS\_rc|1  
GCCTCAACATCATCTAAGTTCATATCTATTACAGTGCTTTGCAGAGGTTCTCAATAACT  
>HPV23\_Beta\_1020186\_nt3888\_AOS\_rc|1  
TACATTTTTTCCCTTTCATGATTAGAATGAAATGCTATTAACATCCTTGCACGCCCTACTC  
>HPV23\_Beta\_1020186\_nt3870\_AOS\_rc|1  
GATTAGAATGAAATGCTATTAACATCCTTGCACGCCCTACTCTATCAGTAGAATGACCCC  
>HPV23\_Beta\_1020186\_nt3108\_AOS\_rc|1  
GTCCTTCAACCTTTTCCCAAGTGTCTCATCAGTTTGATAGTAAATATAAGACCATACTG  
>HPV23\_Beta\_1020186\_nt1400\_AOS\_rc|2  
TATGTAGCAACACTGCTTTAGCATTTTTTACATCTTAACAACTTTCAATATGTCCCAGCC  
>HPV23\_Beta\_1020186\_nt209\_AOS\_rc|1  
TCAGTGGTCGCGTCGAGTCCATCAATAATTTGGTGTAGCACATCCTACTTAAATAATGCA  
>HPV28\_Alpha\_1020202\_nt7201\_AOS\_rc|1  
AAACACAGTAGTGCTACTTTTTGGCGCGTTTCGTTTTGCAGCAGACGATCCTCTCGTGG  
>HPV28\_Alpha\_1020202\_nt4240\_AOS\_rc|2  
TAGAAAAGGCAGTGGCTCAATAGCACACTGGGATATACACAGTACTTAAAAATACATTGT  
>HPV28\_Alpha\_1020202\_nt4222\_AOS\_rc|1  
AATAGCACACTGGGATATACACAGTACTTAAAAATACATTGTGGTGACCAACTAACACAC  
>HPV28\_Alpha\_1020202\_nt4101\_AOS\_rc|1  
AAATATAAAACAACAATAGATACACGTCATCTGGCTCCAGAAACAGGACAGTATGATC  
>HPV28\_Alpha\_1020202\_nt4050\_AOS\_rc|1  
AGTATGATCGCCATTGTTGTCCCTTAGCACCAAAGGATACATAGCAAGGCTTATGTATTG  
>HPV28\_Alpha\_1020202\_nt3090\_AOS\_rc|1  
CATCACTATAGTTCTGAGTAAATATGTCTCTCCAGTGTACATAACACATGGATTTGGTTT  
>HPV28\_Alpha\_1020202\_nt1472\_AOS\_rc|1  
AATCTAGGCAAACGGTTTTGCTACTTTTGAAGTGTCTGGATAAGTTCATTAAATCCCAACC  
>HPV28\_Alpha\_1020202\_nt68\_AOS\_rc|1  
TATGTTTTTTAGGCCGTTGGTCATCCATTGAGCTTCTGCCATTCAATGTAAGCCTCTTTTT  
>HPV29\_Alpha\_1020210\_nt5616\_AOS\_rc|1  
TTGTGCAGAGGAGGGCAGAATAATATCAGGGCCCGTGTGTAAAGGCACATCAACTGGCGA  
>HPV29\_Alpha\_1020210\_nt6608\_AOS\_rc|1  
GAGTTTCTCGCCCGTTGTTACCCTTTAAGTACAAGGAATCTGGGATTTTGTCCCCTACTA  
>HPV29\_Alpha\_1020210\_nt6601\_AOS\_rc|1  
TCGCCCCGTTGTTACCCTTTAAGTACAAGGAATCTGGGATTTTGTCCCCTACTACACCAGC  
>HPV29\_Alpha\_1020210\_nt6594\_AOS\_rc|1  
TTGTTACCCCTTTAAGTACAAGGAATCTGGGATTTTGTCCCCTACTACACCAGCACGATTA  
>HPV29\_Alpha\_1020210\_nt5609\_AOS\_rc|1  
GAGGAGGGCAGAATAATATCAGGGCCCGTGTGTAAAGGCACATCAACTGGCGACACGAAT  
>HPV29\_Alpha\_1020210\_nt5602\_AOS\_rc|1  
GCAGAATAATATCAGGGCCCGTGTGTAAAGGCACATCAACTGGCGACACGAATGGAATAG  
>HPV29\_Alpha\_1020210\_nt4180\_AOS\_rc|2  
ATAATCCCAAATGTCTATAAACTATAAAATAACAACAGGCATACCATTAGTATTAACAATC  
>HPV29\_Alpha\_1020210\_nt4031\_AOS\_rc|1  
GTGTTTCGTGCAATGTGCTGCACAACTTGTAATATAGTGCCACCAATCCTAGGTATAAA  
>HPV29\_Alpha\_1020210\_nt2580\_AOS\_rc|1  
TAAACTGGCTCTCCTTTACTTGTTAATGGACATGGATTGCTGAATGTGAATACCTGCAGT  
>HPV29\_Alpha\_1020210\_nt2090\_AOS\_rc|1  
AGTCCCCCTCTCCCTGTACTTTGTTGCTTCTAAACCGTATCCACTCAGACATGGACATTC  
>HPV36\_Beta\_1020218\_nt7389\_AOS\_rc|1  
CGGTCAATATTACTGTTTTTCGCTTGCCTTGGTTTCCTCTGGTGAACCCCTCGATAAGACACT  
>HPV36\_Beta\_1020218\_nt6951\_AOS\_rc|1  
TCTGCAGTGTAATCATTGATGTCCTTTAGTGCCCCATTATTGTTATATATTGAAATACTA

>HPV36\_Beta\_1020218\_nt6695\_AOS\_rc|2  
CAGGAATGAAAACTGATTCTTAAAAGTCCCATTATCAATTCTGGCGTCAGGGATGTCGT  
>HPV36\_Beta\_1020218\_nt5518\_AOS\_rc|1  
CAGAAAAGGCTTCCACACTTTCAGACAAAGGATTTTCAGACACATTTACGTCTATAAATG  
>HPV36\_Beta\_1020218\_nt3618\_AOS\_rc|1  
CCCCTTCTAGAGGTGCTTCTGGATCGTGATCTGGTTGATACCCGCTGGACCCCAGTCTTG  
>HPV36\_Beta\_1020218\_nt3611\_AOS\_rc|1  
TAGAGGTGCTTCTGGATCGTGATCTGGTTGATACCCGCTGGACCCCAGTCTTGGCGAGCG  
>HPV36\_Beta\_1020218\_nt260\_AOS\_rc|2  
AAGGTATTAGACAGTCTACAAACGGAATGCCTAATGATTCTGACAGGCCCTTAATAGTTA  
>HPV36\_Beta\_1020218\_nt253\_AOS\_rc|1  
TAGACAGTCTACAAACGGAATGCCTAATGATTCTGACAGGCCCTTAATAGTTAAAGGCAG  
>HPV36\_Beta\_1020218\_nt183\_AOS\_rc|1  
TCTTTTTCTGTAATATTCTGCTGTTCCGAGGCTTGCTCTGCCATTTGCCCTAATTATTAA  
>HPV37\_Beta\_1020226\_nt6568\_AOS\_rc|1  
CAGTGGGAAAATAGGTAGAATTGCCTAACAGATACTGCTGCTGGTCTGATTGGCAGGTA  
>HPV37\_Beta\_1020226\_nt6538\_AOS\_rc|2  
GATACTGCTGCTGGTCTGATTTGGCAGGTAAGTAATATTTGTGGTCCTGATTAAACAGTGC  
>HPV37\_Beta\_1020226\_nt6312\_AOS\_rc|2  
TGATTTATTAGTAGAGAGAACCTTATTGTTAATATTTCCGAACCCCTATATCAAACATGTC  
>HPV37\_Beta\_1020226\_nt6084\_AOS\_rc|2  
ATCATCCCGTGACCCCCCTTGGTAATTACTATTATTCTCAGTGTCCTTAATTTATTAAA  
>HPV37\_Beta\_1020226\_nt5579\_AOS\_rc|1  
GCCTCTCCAAATCTAATAACTACAGTTGGTGTTTCAGGTTGTGGCAAGATAACTTGTGTT  
>HPV37\_Beta\_1020226\_nt5337\_AOS\_rc|1  
ATTAAATCTGTGTCATCTGCCATAGTAGACTCTTGTTGCCCTATATTTAAGGGACCTGG  
>HPV37\_Beta\_1020226\_nt4929\_AOS\_rc|1  
AAACTGTACTAATTGTGAGGGTCTACTCAAGAATAAAGGATCCGTGACTGCTACCTGTTT  
>HPV37\_Beta\_1020226\_nt2743\_AOS\_rc|1  
TAATGAAACAGGATCTGCTCCTGCCTTAGAAGTTGCCAATGCATAATTTGGGTCTCTAGG  
>HPV37\_Beta\_1020226\_nt2736\_AOS\_rc|1  
ACAGGATCTGCTCCTGCCTTAGAAGTTGCCAATGCATAATTTGGGTCTCTAGGTCATCTC  
>HPV37\_Beta\_1020226\_nt415\_AOS\_rc|1  
CTTTTGCTCTATCTCTTCTATCTCCCTCCCCTAACTGAGTGCTCATAGAACTGGTAAA  
>HPV38\_Beta\_1020234\_nt7129\_AOS\_rc|2  
TGGGTCCCTTTTGCGTTTTACAGATTTGGAAGATTTTCTTACTAACGGCCGTTTGACAGCA  
>HPV38\_Beta\_1020234\_nt7118\_AOS\_rc|1  
GCGTTTTACAGATTTGGAAGATTTTCTTACTAACGGCCGTTTGACAGCACGTGTTTCGTGC  
>HPV38\_Beta\_1020234\_nt5426\_AOS\_rc|1  
TATCCTGATAATATATGTTAGGATTTTGAGGAGTCTGAAATCTAGGTACAGTGATTGACG  
>HPV38\_Beta\_1020234\_nt5413\_AOS\_rc|1  
TATGGTAGGATTTTGAGGAGTCTGAAATCTAGGTACAGTGATTGACGTAGTGATCTGCG  
>HPV38\_Beta\_1020234\_nt5269\_AOS\_rc|1  
ATCCATAGAAGTTTCTGTAAGAACACCTTCAGGAACCTCAGTCACATTTACATCCACTAA  
>HPV38\_Beta\_1020234\_nt5262\_AOS\_rc|1  
GAAGTTTCTGTAAGAACACCTTCAGGAACCTCAGTCACATTTACATCCACTAAAGTGCTT  
>HPV38\_Beta\_1020234\_nt4509\_AOS\_rc|1  
TCAGCCACTTCCAATATAGCATTGGTATTGCGGCCCTCCACTCACAACAGGGGTATCAATT  
>HPV38\_Beta\_1020234\_nt4492\_AOS\_rc|1  
AGCATTGGTATTGCGGCCTCCACTCACAACAGGGGTATCAATTTCTATAGGGTCTATAGG  
>HPV38\_Beta\_1020234\_nt3858\_AOS\_rc|1  
TTTGTGATTCTGAATAAAAAGCTAGAAGCATTCGTGAGCGCCCTATGCGATCATTGATG  
>HPV38\_Beta\_1020234\_nt185\_AOS\_rc|1  
ACTTATCACTGAGCTGCTGCACAGTTTGAGGTTTTGGTAGTTCCATGAATACATCCCAAG  
>HPV44\_Alpha\_1020242\_nt6716\_AOS\_rc|2

CATGTATTGCTTATATTGTTCACTAGTATATGTAGACGGAGGGGACTGTGTAGTGGCAGC  
>HPV55\_Alpha\_1020266\_nt6494\_AOS\_rc|1  
GTATATGGCATTAGGAAGTGTACTTTTAGTAGCACCTTTAAAAACCAAATCCTGTGGAAT  
>HPV55\_Alpha\_1020266\_nt6483\_AOS\_rc|3  
TAGGAAGTGTACTTTTAGTAGCACCTTTAAAAACCAAATCCTGTGGAATGTCTCTCCAA  
>HPV55\_Alpha\_1020266\_nt6474\_AOS\_rc|1  
TACTTTTAGTAGCACCTTTAAAAACCAAATCCTGTGGAATGTCTCTCCAACCGTTCCCG  
>HPV66\_Alpha\_1020290\_nt7066\_AOS\_rc|2  
AGGAAGAGGTAGGAGCCGCCGCTTTTAGAGGCAGATACACTAGCCTTGGGTCTAGGGG  
>HPV66\_Alpha\_1020290\_nt7410\_AOS\_rc|1  
AAATGGCGTACAGCACTAAAATGGAGTTTGGTGTGTACTATAGTGCATACAAACAACCT  
>HPV66\_Alpha\_1020290\_nt7059\_AOS\_rc|1  
GGTAGGAGCCGCCGCTTTTAGAGGCAGATACACTAGCCTTGGGTCTAGGGGGTCTAGG  
>HPV66\_Alpha\_1020290\_nt7052\_AOS\_rc|1  
GCCGCCGCCCTTTTAGAGGCAGATACACTAGCCTTGGGTCTAGGGGGTCTAGGGCCTAGT  
>HPV66\_Alpha\_1020290\_nt6681\_AOS\_rc|2  
CACATGGCGAAGGTATTGATTGATTTCACGGGCATCATATTTAGTTAATGTGCTTTTAGC  
>HPV66\_Alpha\_1020290\_nt6179\_AOS\_rc|1  
TCACCGTCTCTATCGGGGTATTAATAATGCAAGAGGTGGACAATCCCCTGTATTACCT  
>HPV66\_Alpha\_1020290\_nt6171\_AOS\_rc|2  
CTCTATCGGGGTATTAATAATGCAAGAGGTGGACAATCCCCTGTATTACCTGGTGTAGA  
>HPV66\_Alpha\_1020290\_nt249\_AOS\_rc|1  
AACATACCCCTACATACTGCATATGGCCAATTGTTTCTATATACTAGTTTTAACTCAATAC  
>HPV103\_Unclassified\_109390382\_nt6816\_AOS\_rc|1  
CAGATAACTAATTCGGTTGCTGGAAGGCTGAGTAATCTTGTTGTTGAAACTTGCAAAGTA  
>HPV103\_Unclassified\_109390382\_nt6476\_AOS\_rc|1  
AACAAAAATATAAAGTGCATGTGCAACACAGGTAATGCCATAGATTAAACCCCCCGTCTA  
>HPV103\_Unclassified\_109390382\_nt6190\_AOS\_rc|1  
CTAAAGATGTTAAAAATCTGTATGTATCTCCAATAGAAGAAGGAGCGGTGGTACAAACC  
>HPV103\_Unclassified\_109390382\_nt5349\_AOS\_rc|3  
CTGAGTTTGCTTTGGGTCCATAGAGACACTTTGTCTGTTTTCTTTCTTCTGTTTAAACATA  
>HPV103\_Unclassified\_109390382\_nt5338\_AOS\_rc|1  
TTGGGTCCATAGAGACACTTTGTCTGTTTTCTTTCTTCTGTTTAAACATAACTATTAGGAT  
>HPV103\_Unclassified\_109390382\_nt4028\_AOS\_rc|1  
AAATGTGGCAGACCCCTGTGTTTCCACAAATGTTTCTAATGGTATAGATTCCCCAATATT  
>HPV103\_Unclassified\_109390382\_nt4002\_AOS\_rc|1  
CAAATGTTTCTAATGGTATAGATTCCCCAATATTGACAACAGATCCTTCTGTTACAGCAC  
>HPV103\_Unclassified\_109390382\_nt3992\_AOS\_rc|1  
TAATGGTATAGATTCCCCAATATTGACAACAGATCCTTCTGTTACAGCACCCCCCTATAAA  
>HPV103\_Unclassified\_109390382\_nt3346\_AOS\_rc|1  
ATATTTTCCACAGTATCCCGTTTTTGTGCGTTTTTCGGTTGTACATCCATGTAAGCTATT  
>HPV103\_Unclassified\_109390382\_nt3254\_AOS\_rc|1  
TGTAAGGGTTAGGATAATATACAGGGGACCATTGGCAGCATTATTGGCTTAAAATGAATC  
>HPV101\_Unclassified\_109390389\_nt6831\_AOS\_rc|1  
CAAAACACATGAGTAATACATTTGTTAAACATGAACATACCTGCTGGCAAAATTGGCAG  
>HPV101\_Unclassified\_109390389\_nt6652\_AOS\_rc|1  
AAATACTGCCCTGAGTCAGAAGAAATAACTCATACAACGACAATGTTGACATGCTACATA  
>HPV101\_Unclassified\_109390389\_nt4092\_AOS\_rc|1  
GAAGACCCCTCTGTTTCAACAAATGTGTCTAAAGGTATAGATTACCTATACTAATAACC  
>HPV101\_Unclassified\_109390389\_nt3337\_AOS\_rc|1  
AAGAAGTATAATATACAAGGTACACAAAATCACAAGAGGCAGATGTGATGCTATTTACAA  
>HPV101\_Unclassified\_109390389\_nt3330\_AOS\_rc|1  
ATAATATACAAGGTACACAAAATCACAAGAGGCAGATGTGATGCTATTTACAAATAGGCA  
>HPV101\_Unclassified\_109390389\_nt3225\_AOS\_rc|1  
AAAACGTGTACCCTTTGGTAACCTTCACAGTATGTAAAAACCTTTCCCGTTGGCTATTAT

>HPV101\_Unclassified\_109390389\_nt3218\_AOS\_rc|1  
TGTACCCCTTGGTAACTTCACAGTATGTAAAAACCTTCCCGTTGGCTATTATTTCTAAA  
>HPV101\_Unclassified\_109390389\_nt2669\_AOS\_rc|1  
GGTAACAGAATTAGATATTATTTCACTTTCAGTTCGTAAGTTCATTTGCTGCATC  
>HPV101\_Unclassified\_109390389\_nt980\_AOS\_rc|2  
GATTTATAATTTGCAGGTATTCACAATGTGGTTGCAGTAATGTTTTTGCTGCCTCCAGTA  
>HPV101\_Unclassified\_109390389\_nt903\_AOS\_rc|1  
AATATCCCCGCTATCCAAGTGCAGCAACAGCTTTTATTACTTATGAATGGTCTTGTTAAT  
>HPV70\_Alpha\_1173493\_nt7811\_AOS\_rc|1  
GTTGCACACAGGTCTGTAAAAATATTAGTCACAAAATATAACTTGCACCAAACGACACAT  
>HPV70\_Alpha\_1173493\_nt5310\_AOS\_rc|1  
ATTTTGTAGACACTGTAGAAGGTATAGAAGGAAATGAAAGATGGGACCTAGGTCCTGTAG  
>HPV70\_Alpha\_1173493\_nt5272\_AOS\_rc|1  
AGATGGGACCTAGGTCCTGTAGAAGTGTATGAGAAGTAGTATGTAACATTGCATTATCT  
>HPV70\_Alpha\_1173493\_nt1486\_AOS\_rc|1  
CTTTTTGGTTATTAGCCTGTAATACTGTTTTTAGCTGTGCAGTAGGTGACTGTGGATCTT  
>HPV70\_Alpha\_1173493\_nt1479\_AOS\_rc|1  
GTTATTAGCCTGTAATACTGTTTTTAGCTGTGCAGTAGGTGACTGTGGATCTTGATTCTC  
>HPV70\_Alpha\_1173493\_nt1471\_AOS\_rc|1  
CCTGTAATACTGTTTTTAGCTGTGCAGTAGGTGACTGTGGATCTTGATTCTCACTATCAA  
>HPV70\_Alpha\_1173493\_nt1267\_AOS\_rc|1  
CTGGTACTGAATACACGTTTGTCTTGCTGTTTATTGCATATGTTTACCGGGAGCTCTT  
>HPV70\_Alpha\_1173493\_nt1260\_AOS\_rc|2  
TGAATACACGTTTGTCTTGCTGTTTATTGCATATGTTTACCGGGAGCTCTTGAGTGT  
>HPV70\_Alpha\_1173493\_nt1247\_AOS\_rc|1  
GTTCTTGCTGTTTATTGCATATGTTTACCGGGAGCTCTTGAGTGTACCCTTTGTTCC  
>HPV70\_Alpha\_1173493\_nt1237\_AOS\_rc|1  
GTTTATTGCATATGTTTACCGGGAGCTCTTGAGTGTACCCTTTGTTCCCTATGTACGC  
>HPV71\_Alpha\_12084981\_nt7864\_AOS\_rc|1  
CCAAAAACGTACTTAGGCGAACATAGTCAGCACAACTATATGCCCCAAACAATGGGTATT  
>HPV71\_Alpha\_12084981\_nt7842\_AOS\_rc|1  
ATAGTCAGCACAACTATATGCCCCAAACAATGGGTATTGCACGGTGAGTAACACATGTAT  
>HPV71\_Alpha\_12084981\_nt6548\_AOS\_rc|1  
TAAATGTCTTAAACATTGCTCTCGGCGCAAGAAAAACATGCGATCACCAATGGCTCTG  
>HPV71\_Alpha\_12084981\_nt5507\_AOS\_rc|1  
TAGTAGGTGTAGGCCTGCTGGACACAGAAGTAGGTTGAATGACAGTATCATTGGAATAAT  
>HPV71\_Alpha\_12084981\_nt4272\_AOS\_rc|1  
GGTACCTACTGCATCAACCGTAACAAAAACAGAAGCAACATAAGACACACCAACACTAAA  
>HPV71\_Alpha\_12084981\_nt4035\_AOS\_rc|1  
TAAGGGACGCTGCTGCCTGTATATATAGTGCTAGAAACCCAAGAAACACAGTAACAAAAA  
>HPV71\_Alpha\_12084981\_nt4028\_AOS\_rc|1  
CGCTGCTGCCTGTATATATAGTGCTAGAAACCCAAGAAACACAGTAACAAAAAAATTAA  
>HPV71\_Alpha\_12084981\_nt3186\_AOS\_rc|1  
CCCATATATTACTGCTTCCTTGGAGAATAATACACAGTCTACACGTATCCCATCGTGTA  
>HPV107\_Beta\_126131393\_nt7432\_AOS\_rc|1  
GTGTTTCCTCGAGATCCAGCCAAGTCTTGTCTTGTGTTGGCACCGACAGCGATATATAAT  
>HPV107\_Beta\_126131393\_nt6610\_AOS\_rc|1  
AAGGACTTTGGGATTGTCCACTCTTAGGTGCTATATAGTATTTGTGATCTTGATTAGTTG  
>HPV107\_Beta\_126131393\_nt5546\_AOS\_rc|1  
GCACATATAAAGTAGTTTTCCCTTGGAGAATAAATCTGGGTACAGTGACAGAAGTGGTAG  
>HPV107\_Beta\_126131393\_nt5407\_AOS\_rc|1  
AAATTCAGAACTTTCAAGCAATTCTGGAGTATCCCTTACATTAATATCCACCAGTGTACT  
>HPV107\_Beta\_126131393\_nt3976\_AOS\_rc|1  
ACTATGTTCCCCATCCAGGACCAGGTACTACTAAAATACTTATAGTTTCCCTTTGTGCTT  
>HPV107\_Beta\_126131393\_nt3969\_AOS\_rc|1

TCCCCTATCCAGGACCAGGTACTACTAAAACTTATAGTTTCCTTTGTGCTTTTTGCGT  
>HPV107\_Beta\_126131393\_nt901\_AOS\_rc|1  
TCTTGAAGCAAAAGATCCTGCAATGCCCGAATGCCAAAATGGGTTGCAAAAACGTAGAGA  
>HPV107\_Beta\_126131393\_nt506\_AOS\_rc|1  
ATACTTTGCTGAGTGATCTCCTCAATCTGCTTACCTACAACCTGAAATTCAAAATGATTT  
>HPV107\_Beta\_126131393\_nt295\_AOS\_rc|1  
AGTCTTCCACTGGTATATTAAGATGCTGTGTAAGCTGTACGATTGTCCTTGGCCTGTCCA  
>HPV107\_Beta\_126131393\_nt288\_AOS\_rc|1  
CACTGGTATATTAAGATGCTGTGTAAGCTGTACGATTGTCCTTGGCCTGTCCATGAGCAT  
>HPV84\_Alpha\_12958167\_nt7808\_AOS\_rc|1  
ACTGTATCATTTGTTGTAAAGTATAAGAAAAAGTATGAATAACATAGCAACCGAAACGGG  
>HPV84\_Alpha\_12958167\_nt4166\_AOS\_rc|1  
AAAAGCACTTTAAAACTGCATAACACGGTGGCACAGCCAAAGTAAAAATAACAATTAA  
>HPV84\_Alpha\_12958167\_nt4151\_AOS\_rc|1  
CTGCATAACACGGTGGCACAGCCAAAGTAAAAATAACAATTAAAGCAAAAATAATAGT  
>HPV84\_Alpha\_12958167\_nt3767\_AOS\_rc|1  
TTTGCCAGGTATGTAGGACATACACAATTGTTACAAATGGCTCAGTAATACAGCATTTAC  
>HPV84\_Alpha\_12958167\_nt3715\_AOS\_rc|1  
GCATTTACACTATACATATACAATGGGTACTGTTTACATAACCATAGACATACTACCAAG  
>HPV84\_Alpha\_12958167\_nt3707\_AOS\_rc|1  
ACTATACATATACAATGGGTACTGTTTACATAACCATAGACATACTACCAAGTGTGGCTA  
>HPV84\_Alpha\_12958167\_nt3700\_AOS\_rc|2  
ATATACAATGGGTACTGTTTACATAACCATAGACATACTACCAAGTGTGGCTACAATGCC  
>HPV84\_Alpha\_12958167\_nt3622\_AOS\_rc|1  
TGCCAAGAGCTGTTTGCCTTGGTCCGTACTTTTATACCATAGTGTACATATGATGTTTT  
>HPV84\_Alpha\_12958167\_nt2433\_AOS\_rc|1  
ATCCAGTGGGCACTTGTTTAAAAAGGGAAAAATAACCATTCGGCTGCGTAAGTATTTAAA  
>HPV84\_Alpha\_12958167\_nt2426\_AOS\_rc|1  
GGGCACCTGTTTAAAAAGGGAAAAATAACCATTCGGCTGCGTAAGTATTTAAATGTGTCA  
>HPVcand87\_Alpha\_14475578\_nt5486\_AOS\_rc|1  
ATTGTCATAATGGGAAGAGGATAGTATGGACGTGGCCGACACCTTTGTAGATGCTGTAGG  
>HPVcand87\_Alpha\_14475578\_nt6572\_AOS\_rc|2  
TAAGTCTTAAAGAGGCCCTAGGGCCAGACGACGCCCCCTTCAAAAAATAGGTGTCAGGG  
>HPVcand87\_Alpha\_14475578\_nt3861\_AOS\_rc|1  
GTATATGTCAGGTATGCAAAATGTATTATACAGCTAGGTTACATACAGGTACACCAATGT  
>HPVcand87\_Alpha\_14475578\_nt3854\_AOS\_rc|1  
TCAGGTATGCAAAATGTATTATACAGCTAGGTTACATACAGGTACACCAATGTATACAGT  
>HPVcand87\_Alpha\_14475578\_nt3845\_AOS\_rc|1  
CAAAATGTATTATACAGCTAGGTTACATACAGGTACACCAATGTATACAGTATTATGCAC  
>HPVcand87\_Alpha\_14475578\_nt2525\_AOS\_rc|1  
TGTGTAGAAAACGGAAACACCACCATCTGCTCCGTAAATACTTTAAACTGTCATCTGCCT  
>HPV72\_Alpha\_1491683\_nt7927\_AOS\_rc|1  
ACTATAAAACCATGAGACATAGGGGAGCGACCGGAGTAGAATGTTTTAACACGTTTGTAA  
>HPV72\_Alpha\_1491683\_nt7920\_AOS\_rc|2  
AACCATGAGACATAGGGGAGCGACCGGAGTAGAATGTTTTAACACGTTTGTAAAGGGCTT  
>HPV72\_Alpha\_1491683\_nt7261\_AOS\_rc|1  
AACAGTATGACATGTTACTTTTTGCGCTTTTACGTTTAGTAGGGGCGGGGTCGAGGTA  
>HPV72\_Alpha\_1491683\_nt7254\_AOS\_rc|1  
TGACATGTTACTTTTTGCGCTTTTACGTTTAGTAGGGGCGGGGTCGAGGTAGAGCTTG  
>HPV72\_Alpha\_1491683\_nt6830\_AOS\_rc|1  
GTGGCGAAGATACTCACGAAAATTAGAAGCTGTATATTCTGATACAGAGGACGCTGTGGC  
>HPV72\_Alpha\_1491683\_nt5628\_AOS\_rc|1  
TGCGTAGAGGGTACAAGAGGCATTGTAGGTACAGGGGCAGGAGCAAAGGACAAATCAATG  
>HPV72\_Alpha\_1491683\_nt5497\_AOS\_rc|1  
AACAGCAGACGCTGCAGACAGGGACGGGCTGTGCAATGATGTAGAAGACACAGAAGCACG



>HPV72\_Alpha\_1491683\_nt5398\_AOS\_rc|1  
ATATGTTATGTCTGGCTGCGTAGAGGAGGCCAAGGATTGCATTTCAATAGTATCAGATGA  
>HPV72\_Alpha\_1491683\_nt4200\_AOS\_rc|2  
CAAGAAGAACCACAATCCACAATTATCGTCTCGTAGTACAATTAATGCACCCCCATCCGT  
>HPV72\_Alpha\_1491683\_nt128\_AOS\_rc|1  
GCAGGTAATCCGTAAATCTTCTAGGTCCACCTCAATTTTCCTTGCACAGCAACCAAATATT  
>HPV73\_Alpha\_1491692\_nt7206\_AOS\_rc|1  
GCGACTATACAAAATGGAAGCACAGTAGTCAAGTAAACCACCCACACAACACACATATAA  
>HPV73\_Alpha\_1491692\_nt6277\_AOS\_rc|1  
CAGTATTGCCTGTGCCTTTAATCATTAGGTCATCTGGGATTTTATCACCGGTATCACCAG  
>HPV73\_Alpha\_1491692\_nt4315\_AOS\_rc|1  
GTAACAACCTGATGGTCGTATAGGTTGTAATGGAATTTCAACTGGTTTAGATGGTGTGCCT  
>HPV73\_Alpha\_1491692\_nt4308\_AOS\_rc|1  
CTGATGGTCGTATAGGTTGTAATGGAATTTCAACTGGTTTAGATGGTGTGCCTGTAGATA  
>HPV73\_Alpha\_1491692\_nt4300\_AOS\_rc|2  
CGTATAGGTTGTAATGGAATTTCAACTGGTTTAGATGGTGTGCCTGTAGATAATGGAACG  
>HPV73\_Alpha\_1491692\_nt1319\_AOS\_rc|1  
GACCCACTACTGCTTTCACGTGGCGACACAATTTGGTTGCCTTCTTCATTAACATTTTGT  
>HPV73\_Alpha\_1491692\_nt1311\_AOS\_rc|1  
ACTGCTTTCACGTGGCGACACAATTTGGTTGCCTTCTTCATTAACATTTTGTAAACACCC  
>HPV73\_Alpha\_1491692\_nt1304\_AOS\_rc|1  
TCACGTGGCGACACAATTTGGTTGCCTTCTTCATTAACATTTTGTAAACACCCTACCCCT  
>HPV73\_Alpha\_1491692\_nt1295\_AOS\_rc|1  
GACACAATTTGGTTGCCTTCTTCATTAACATTTTGTAAACACCCTACCCCTGCCCCAAGT  
>HPV73\_Alpha\_1491692\_nt734\_AOS\_rc|1  
AGCAACTCTTCTATCACTCTTAAATCAGCTTTGTTGCTTTCAATGGCAAGGCATACTGTG  
>HPVcand86\_Alpha\_15741127\_nt7836\_AOS\_rc|1  
TTAACTACATGATTGTTGTTAAGTATAAAGAAGGAAGTATGAATAATACAGCGACCGAGT  
>HPVcand86\_Alpha\_15741127\_nt6700\_AOS\_rc|2  
CTTAGATATTCATTAACTTAGAGGGGTCATATTCAGAGGCCTTCTGGGTAGCGGCACTA  
>HPVcand86\_Alpha\_15741127\_nt5377\_AOS\_rc|1  
ATATGTGGAAGATACCATAGATGTGGCGGACACTGTAGCAGAGGATACAGGCGTGGTGGA  
>HPVcand86\_Alpha\_15741127\_nt5368\_AOS\_rc|1  
AGATACCATAGATGTGGCGGACACTGTAGCAGAGGATACAGGCGTGGTGGAATGCAATGA  
>HPVcand86\_Alpha\_15741127\_nt5344\_AOS\_rc|1  
TGTAGCAGAGGATACAGGCGTGGTGGAATGCAATGAGGGAACGGAAGGCTCCTGTAATAT  
>HPVcand86\_Alpha\_15741127\_nt5337\_AOS\_rc|1  
GAGGATACAGGCGTGGTGGAATGCAATGAGGGAACGGAAGGCTCCTGTAATATAGAGGAT  
>HPVcand86\_Alpha\_15741127\_nt5329\_AOS\_rc|1  
AGGCGTGGTGGAATGCAATGAGGGAACGGAAGGCTCCTGTAATATAGAGGATAGGTGTGT  
>HPVcand86\_Alpha\_15741127\_nt5322\_AOS\_rc|1  
GTGGAATGCAATGAGGGAACGGAAGGCTCCTGTAATATAGAGGATAGGTGTGTATCATCT  
>HPVcand86\_Alpha\_15741127\_nt1560\_AOS\_rc|2  
CATACGCTTTTCTGGAATATTTAGTATGGTTCCCTAGGCACCTTTGCTACGGTTTCTCTGCT  
>HPV88\_Gamma\_167600365\_nt6130\_AOS\_rc|1  
TGAGATCCCATTTTAAAATTCACAGCATTTGTAGGTGGCAATAAGTATTTATTTCCCTCT  
>HPV88\_Gamma\_167600365\_nt5089\_AOS\_rc|1  
AGGATATGAAACTATAATATCTGCATAATCATCTACAAAAGCTTTTATTGCTGCGCCAGG  
>HPV88\_Gamma\_167600365\_nt5024\_AOS\_rc|1  
GAGTAGGAACAGATATAAGTTCATCCTCTCCTCAAATGCACAAATAAGTGAATATTAC  
>HPV88\_Gamma\_167600365\_nt4847\_AOS\_rc|1  
TAAACTCCCCCTAAATTAGAAAGCTCAATAACATCAGGCTCTATAGGTTCAATTGCACTAA  
>HPV88\_Gamma\_167600365\_nt4540\_AOS\_rc|2  
TGAAGGCCGGGTAAAAAGTCAACATTGTCTGTTCTGATTTGTTGAATGTAACGATTATA  
>HPV88\_Gamma\_167600365\_nt4533\_AOS\_rc|1

CGGGTTAAAAAGTCAACATTGTCTGTTCTGATTTGTTGAATGTAACGATTATATAAGCTT  
>HPV88\_Gamma\_167600365\_nt4526\_AOS\_rc|1  
AAAAGTCAACATTGTCTGTTCTGATTTGTTGAATGTAACGATTATATAAGCTTCTGGCCC  
>HPV88\_Gamma\_167600365\_nt3715\_AOS\_rc|1  
CAAATTCTCAGCAGTGTACGTTTACTTCTGGTTTTATACATAGTTACAATGAATCAAGG  
>HPV88\_Gamma\_167600365\_nt3683\_AOS\_rc|1  
TTTTATACATAGTTACAATGAATCAAGGTAACCAAATGCGTAGGTTGTACCCTTTGGCAA  
>HPV88\_Gamma\_167600365\_nt2902\_AOS\_rc|1  
TAATAAATATGTTCCCATTGTGTGTAGGGAAAAGCTGTTTTCTCGATCATTATCAAAGTAC  
>HPV110\_Beta\_186461194\_nt5522\_AOS\_rc|1  
TGTATGACCACAGTTGGAGTATCAGGTAGTGGGAGTATAATTTTCAGTGTGTCTCTAGAT  
>HPV110\_Beta\_186461194\_nt5286\_AOS\_rc|1  
ATCTGGTTCTTCTATTTCCATTGATTCAAACGCCCCAACATTTAAAGGATCTGGCTCGTC  
>HPV110\_Beta\_186461194\_nt5279\_AOS\_rc|1  
TCTTCTATTTCCATTGATTCAAACGCCCCAACATTTAAAGGATCTGGCTCGTCTATATTA  
>HPV110\_Beta\_186461194\_nt760\_AOS\_rc|2  
AAAATTTCTTGCTGAGTACGAATTCACAAAACGTTTGCAAGCACAAAAAGCCGAAGTCGC  
>HPV110\_Beta\_186461194\_nt495\_AOS\_rc|1  
GCCTCTTACCCTATGAAATTGCTGATGCTTACAACAACTTCTAGCTTCTCTATTAGATC  
>HPV110\_Beta\_186461194\_nt413\_AOS\_rc|1  
CAACGCACAACCCTTCCCCAATTCCTTTTTGCTCTACTATTTCTATTTTCACGTCCATTT  
>HPV110\_Beta\_186461194\_nt406\_AOS\_rc|1  
CAACCACTTCCCCAATTCCTTTTTGCTCTACTATTTCTATTTTCACGTCCATTTACAGAAT  
>HPV110\_Beta\_186461194\_nt399\_AOS\_rc|1  
TTCCCCAATTCCTTTTTGCTCTACTATTTCTATTTTCACGTCCATTTACAGAATGTTTCATA  
>HPV110\_Beta\_186461194\_nt389\_AOS\_rc|1  
CCTTTTTGCTCTACTATTTCTATTTTCACGTCCATTTACAGAATGTTTCATAAAACCTTGTA  
>HPV110\_Beta\_186461194\_nt198\_AOS\_rc|1  
AAATCTACACGGTATTAATATGTCTAAAACAGGAATGCATAATGTATCTGCAAGCTGTTG  
>HPV111\_Beta\_186461202\_nt5484\_AOS\_rc|1  
AGAAGTATCTGATATGTGAATCACAACTGTGGGAGCTTCTGGATGAGGAAAAATAATATT  
>HPV111\_Beta\_186461202\_nt5258\_AOS\_rc|1  
AATAACAAATCTTCTGAATTAATAATCTATTTTCATCTTCTAATGGAGGGGTTCCGGTCTG  
>HPV111\_Beta\_186461202\_nt2691\_AOS\_rc|1  
TTTCGAGCAAAGTACAATAAAACTTGCTCTTGTCTCAATGCTTGCCAATGTTCAATCTGA  
>HPV111\_Beta\_186461202\_nt1951\_AOS\_rc|1  
AATAATTGTTTGTGAATCCAAGTTGACATACTCATCTCTCGCATCTCCCCCTCGAATATAA  
>HPV111\_Beta\_186461202\_nt1589\_AOS\_rc|1  
TTTAGGAGGATCTGCCAATACCTGCACTTCTGATACTTGTAATATTGTGCTTAATAATCG  
>HPV111\_Beta\_186461202\_nt487\_AOS\_rc|1  
TTCCAATTATCCCTAACTCTATGAAAATATTGTTGTTTGTAGCACACTCCTAGCTTCTCT  
>HPV111\_Beta\_186461202\_nt480\_AOS\_rc|2  
TATCCCTAACTCTATGAAAATATTGTTGTTTGTAGCACACTCCTAGCTTCTCTACCAGAT  
>HPV111\_Beta\_186461202\_nt399\_AOS\_rc|1  
GACACCTAACAGTAATATTTCCAATAGGCTGGTTTGCTACAGTTTCTATCTGTTTTCCCTA  
>HPVFA75/KI88-03\_Unclassified\_206902429\_nt7261\_AOS\_rc|1  
AGACAGACTGCCAAGTCTTTGTAAGGTGAAGTACCGGCTGCGATTTATAAGCAGATTATA  
>HPVFA75/KI88-03\_Unclassified\_206902429\_nt5141\_AOS\_rc|1  
TTCTCCTAAAAGTTGTAATTCTATGGGCTCCTCAGTGTTAATTGTACTAAGGTCCCTGTA  
>HPVFA75/KI88-03\_Unclassified\_206902429\_nt3791\_AOS\_rc|1  
TGTTCTGTGATCCATGACCAAGTACTACTGACATATTTGTAGCCACCCTTATGCCTTTTA  
>HPVFA75/KI88-03\_Unclassified\_206902429\_nt3784\_AOS\_rc|1  
TGATCCATGACCAAGTACTACTGACATATTTGTAGCCACCCTTATGCCTTTTATGCACCC  
>HPVFA75/KI88-03\_Unclassified\_206902429\_nt1776\_AOS\_rc|1  
GTATCATGTCAGATAAAGAAAATTGCGTGGCCTCCAAAGATTGATGGCTAATCATAGTTT

>HPVFA75/KI88-03\_Unclassified\_206902429\_nt1644\_AOS\_rc|1  
ATGCCGCTATTACACTACGCCACTTAGGTGGTTCAGACAATGTTTGAATTCATTTACTT  
>HPVFA75/KI88-03\_Unclassified\_206902429\_nt1626\_AOS\_rc|1  
GCCACTTAGGTGGTTCAGACAATGTTTGAATTCATTTACTTGCAAAATAGAAGATAGTA  
>HPVFA75/KI88-03\_Unclassified\_206902429\_nt129\_AOS\_rc|1  
GAACCTGTACTGTTCTAGGCCTCTCCATCAGTATATGTGTCTCTAATATTCTTCAAGTAA  
>HPVFA75/KI88-03\_Unclassified\_206902429\_nt122\_AOS\_rc|1  
TACTGTTCTAGGCCTCTCCATCAGTATATGTGTCTCTAATATTCTTCAAGTAATTTTATA  
>HPV91\_Alpha\_22023568\_nt7701\_AOS\_rc|1  
TCAATGTAACCTTGCAATTATGCTGACACAATACCTACGTTGCCAAACACGACCGAAATC  
>HPV91\_Alpha\_22023568\_nt7596\_AOS\_rc|1  
ATGACTACCACCAGACCTAAACCCCAACGCTGCCCAACGCTGGACATTCATAACACAAA  
>HPV91\_Alpha\_22023568\_nt7586\_AOS\_rc|1  
CCAGACCTAAACCCCAACGCTGCCCAACGCTGGACATTCATAACACAAAACAGGAAAGA  
>HPV91\_Alpha\_22023568\_nt7579\_AOS\_rc|1  
TAAACCCCAACGCTGCCCAACGCTGGACATTCATAACACAAAACAGGAAAGAAACACAT  
>HPV91\_Alpha\_22023568\_nt5992\_AOS\_rc|2  
GGAACAATTACTTTACCAGAATTATTTTTTATAGGAAAAAAGGGTGGCCACAGCCAGT  
>HPV91\_Alpha\_22023568\_nt3950\_AOS\_rc|1  
GAGTGTTACAACACCCTTAACGTCACAGTAACAGTTCCACTATACAAGCAATATACAAGG  
>HPV91\_Alpha\_22023568\_nt3605\_AOS\_rc|1  
ACCACTGTGCCCTCCTTGTTGTGGTTTGAATGCTTAGGGATGATTTCGTGGGTCTCTACT  
>HPV91\_Alpha\_22023568\_nt3595\_AOS\_rc|1  
CCTCCTTGTTGTGGTTTGAATGCTTAGGGATGATTTCGTGGGTCTCTACTGTCCAATGGC  
>HPV91\_Alpha\_22023568\_nt3588\_AOS\_rc|1  
GGTTGTGGTTTGAATGCTTAGGGATGATTTCGTGGGTCTCTACTGTCCAATGGCTCTCCTC  
>HPV91\_Alpha\_22023568\_nt3581\_AOS\_rc|1  
GTTTGAATGCTTAGGGATGATTTCGTGGGTCTCTACTGTCCAATGGCTCTCCTCCAACAGT  
>HPVcand89\_Alpha\_22095322\_nt7658\_AOS\_rc|1  
GTGGAACATGTAGCCGCCTACGCAGGAAGTATAAAAGATTACAAGTCTTGTGTAAAGTG  
>HPVcand89\_Alpha\_22095322\_nt7642\_AOS\_rc|1  
CCTACGCAGGAAGTATAAAAGATTACAAGTCTTGTGTAAAGTGCCATGGCGCCATAACA  
>HPVcand89\_Alpha\_22095322\_nt7555\_AOS\_rc|1  
GGTCGCTGAACTCAAATGGACGCTGGGTGGGAAAGGAAATGGCCGAATACATATCTCAT  
>HPVcand89\_Alpha\_22095322\_nt7547\_AOS\_rc|1  
AACTCAAAATGGACGCTGGGTGGGAAAGGAAATGGCCGAATACATATCTCATAGGGCGCA  
>HPVcand89\_Alpha\_22095322\_nt6560\_AOS\_rc|3  
GTAAGTGTATTTCTGTTATTAGCAGCAGACCCAGGCATATACAAGGTTTTTGGCAGGTCC  
>HPVcand89\_Alpha\_22095322\_nt5480\_AOS\_rc|2  
TTGTGTATTGAGACGATACAGCAGATGTAGCAGTAACGGTCGGGCCAGAAAAGGTGGTAT  
>HPVcand89\_Alpha\_22095322\_nt4329\_AOS\_rc|1  
ACCGAAGCCCGTTTACGACGCCGCACAGGGTGGGTCATTGCAACAATGTATTTATTGTAT  
>HPVcand89\_Alpha\_22095322\_nt307\_AOS\_rc|1  
ATCGCTCGTTAAAATACACCATATAGTCCTTTTCCTGGCTGCCTAACGGCTTACAGCATA  
>HPVcand89\_Alpha\_22095322\_nt62\_AOS\_rc|1  
AGCACTTCTGATGTTGTAAGCTCCTTGGTGCAATATATGCATGTAAGCCGTAGATCCTCT  
>HPVcand89\_Alpha\_22095322\_nt55\_AOS\_rc|1  
CTGATGTTGTAAGCTCCTTGGTGCAATATATGCATGTAAGCCGTAGATCCTCTAAATCCA  
>HPV90\_Alpha\_22138122\_nt7261\_AOS\_rc|1  
CACATAACATGCTTAGGAACGTTTGGACCGTTTACGTTTGTAGAGGGGGCGGTAGAGGG  
>HPV90\_Alpha\_22138122\_nt7254\_AOS\_rc|1  
CATGCTTAGGAACGTTTGGACCGTTTACGTTTGTAGAGGGGGCGGTAGAGGGTGCGGGA  
>HPV90\_Alpha\_22138122\_nt6603\_AOS\_rc|1  
CTTGTAGGAGTGCCACGAGAGGTAGAAGATGTTCTTTTAGCACAAAGCCATCGGGAATT  
>HPV90\_Alpha\_22138122\_nt6596\_AOS\_rc|1

GAGTGCCACGAGAGGTAGAAAGATGTTCCCTTTTAGCACAAAGCCATCGGGAATTGCGTCGC  
>HPV90\_Alpha\_22138122\_nt5543\_AOS\_rc|1  
CCTGTAGATAGAGGCACAGTGGTATTGGATGCTGCAGATGATAGGGCAGACGATGCAGTC  
>HPV90\_Alpha\_22138122\_nt3920\_AOS\_rc|1  
GACTGCAACGCCTGTATGTATATGATCAGGAGGCCTAGAAACACAGTAAGGAATACAATA  
>HPV90\_Alpha\_22138122\_nt3679\_AOS\_rc|1  
ATAGTCATGTACCCAGTACTGCTTCAATGTCTTTAGGTAAGGTTATGGTTGATAGGAAG  
>HPV90\_Alpha\_22138122\_nt3671\_AOS\_rc|1  
GTACCCAGTACTGCTTCAATGTCTTTAGGTAAGGTTATGGTTGATAGGAAGGTTGCCCT  
>HPV90\_Alpha\_22138122\_nt3664\_AOS\_rc|1  
AGTACTGCTTCAATGTCTTTAGGTAAGGTTATGGTTGATAGGAAGGTTGCCCTTTGTTCC  
>HPV90\_Alpha\_22138122\_nt1277\_AOS\_rc|1  
GTAATGTGGCCCTTAGGTTACTTGTTTTAAAGCAGAGACAGGATAGCATCTGTACCTGATT  
>HPV58\_Alpha\_222386\_nt7059\_AOS\_rc|2  
GTTTGGTGGATGGTGCACGGGTAGTAGGGGCCGAACGTTTTAGTCTGGGCTTTGCTTTAA  
>HPV58\_Alpha\_222386\_nt5506\_AOS\_rc|1  
ATCCACAATTATGGTATTAAAAGGAGTTAGTGGAGATATAGGAATAAATGGACTAGACAT  
>HPV58\_Alpha\_222386\_nt5486\_AOS\_rc|1  
AAGGAGTTAGTGGAGATATAGGAATAAATGGACTAGACATAGATGTTACAGAAGATGCAA  
>HPV58\_Alpha\_222386\_nt5449\_AOS\_rc|1  
CATAGATGTTACAGAAGATGCAATGTCTGGACCAGGTTCCAATGACACAAGAGGAGTGTC  
>HPV58\_Alpha\_222386\_nt5351\_AOS\_rc|1  
GTGTGGTGGCAAAGGACGTATGTGAGTGCAGAGGACTCTGAAAATCATGTATAGTATCAG  
>HPV58\_Alpha\_222386\_nt5219\_AOS\_rc|1  
ATTCAAATTGTTGCTGCTGTTGTACCTGTTCTGGACAGGCTGTATGGGACTTAAGTCTT  
>HPV58\_Alpha\_222386\_nt5210\_AOS\_rc|1  
GTTGCTGCTGTTGTACCTGTTCTGGACAGGCTGTATGGGACTTAAGTCTTGGTAGTAAT  
>HPV58\_Alpha\_222386\_nt5203\_AOS\_rc|1  
CTGTTGTACCTGTTCTGGACAGGCTGTATGGGACTTAAGTCTTGGTAGTAATGTACTTT  
>HPV58\_Alpha\_222386\_nt3460\_AOS\_rc|2  
TCGTGGTCTACTGTCCACGGCGCAGTCTGTATACTTTGTGGAGTACTGGGTGTTGTCTCT  
>HPV58\_Alpha\_222386\_nt3444\_AOS\_rc|1  
ACGGCGCAGTCTGTATACTTTGTGGAGTACTGGGTGTTGTCTCTGGAGTCTGGTAAATCG  
>HPV74\_Alpha\_27462483\_nt7051\_AOS\_rc|1  
AACAAAAGCATGCTATCGTTTCCTAGAGCGTTTCTGTTTGTAGTGGTTGAGGAGGGGGCTGT  
>HPV74\_Alpha\_27462483\_nt7044\_AOS\_rc|1  
GCATGCTATCGTTTCCTAGAGCGTTTCTGTTTGTAGTGGTTGAGGAGGGGGCTGTAGGGGCC  
>HPV74\_Alpha\_27462483\_nt7037\_AOS\_rc|2  
ATCGTTTTCCTAGAGCGTTTCTGTTTGTAGTGGTTGAGGAGGGGGCTGTAGGGGCCGAACGCT  
>HPV74\_Alpha\_27462483\_nt7030\_AOS\_rc|1  
CCTAGAGCGTTTCTGTTTGTAGTGGTTGAGGAGGGGGCTGTAGGGGCCGAACGCTTTTACC  
>HPV74\_Alpha\_27462483\_nt4705\_AOS\_rc|1  
TAGAGGAGGAAATCAGCACATGACCACCAGCCTCTACGGGGGGTTGAGACTGTATAACAG  
>HPV74\_Alpha\_27462483\_nt4698\_AOS\_rc|1  
GGAAATCAGCACATGACCACCAGCCTCTACGGGGGGTTGAGACTGTATAACAGAAGGGTC  
>HPV74\_Alpha\_27462483\_nt4683\_AOS\_rc|1  
ACCACCAGCCTCTACGGGGGGTTGAGACTGTATAACAGAAGGGTCAGTAAACGAGGGATT  
>HPV74\_Alpha\_27462483\_nt4142\_AOS\_rc|1  
CCATACACAGCATGTATAAAACACTTATTACTGCATACAGAAGGCGTTACACCTTGA  
>HPV74\_Alpha\_27462483\_nt2989\_AOS\_rc|1  
CCTATAGTCAACTTGTCTTCCACCTTTACCCATTCTGCGCCGTCCAGTATATATATAAA  
>HPV92\_Beta\_27531786\_nt5260\_AOS\_rc|2  
TCTAGGTGTACATTTTCTCTAAATTAGGTAAGTCTTCCAAATCAATATTTACGAACGTA  
>HPV92\_Beta\_27531786\_nt5154\_AOS\_rc|1  
CAAGAACTTGCAGTTCAATAGAAGGTTGAGTATCAATACTGCTAATATCCCTAAAAAAAT

>HPV92\_Beta\_27531786\_nt3875\_AOS\_rc|1  
AAAACATTTGTCTTTGAGATTTACTGGTAAAGCTAATAATCATTCTAGAGCGTCCTATTC  
>HPV92\_Beta\_27531786\_nt3868\_AOS\_rc|1  
TTGTCTTTGAGATTTACTGGTAAAGCTAATAATCATTCTAGAGCGTCCTATTCATCGTT  
>HPV92\_Beta\_27531786\_nt3041\_AOS\_rc|1  
TAAATCTGCGTGCGTCTTGAGCAAATCTGATATAGTATTGTTTATTTAATCCATCCATAA  
>HPV92\_Beta\_27531786\_nt3033\_AOS\_rc|1  
CGTGCGTCTTGAGCAAATCTGATATAGTATTGTTTATTTAATCCATCCATAAAATAGGCA  
>HPV92\_Beta\_27531786\_nt354\_AOS\_rc|1  
TAAACAAAACCTTACATCTAACAGTTAAACAACACAAAAGACTACCTGAGTCCCTTTCTAT  
>HPV92\_Beta\_27531786\_nt308\_AOS\_rc|1  
GAGTCCCTTTCTATAGCATCCTTTCTTGTTACTACTATACATAAAAAATGTTTGTCTTCT  
>HPV75\_Beta\_2911544\_nt3900\_AOS\_rc|2  
TAACCAATCCCTTTCTGTTTTCTTGTTCTGTACCTAAAGCATTTTAGTATGTTTGGAT  
>HPV75\_Beta\_2911544\_nt7200\_AOS\_rc|3  
ACACTGGCTGTTCTGGTTACCTTGGAAGCCCTTCGTAAGCCTGCCTGAAAAAGGAATTTG  
>HPV75\_Beta\_2911544\_nt4776\_AOS\_rc|1  
GCTTGCCACCAGAGCCATTGGTGACCACGATTTGGTCTGATAATGCAGACTCCCCCAAT  
>HPV75\_Beta\_2911544\_nt3889\_AOS\_rc|1  
TTTCTGTTTTCTTGTTCTGTACCTAAAGCATTTTAGTATGTTTGGATCGCCTCTTAAA  
>HPV75\_Beta\_2911544\_nt471\_AOS\_rc|1  
AGTTTTTCAAATATATCCAAACGTTTCAGACAAAACCTGGCACCTTACAATAAGATTATGT  
>HPV75\_Beta\_2911544\_nt464\_AOS\_rc|1  
CAAATATATCCAAACGTTTCAGACAAAACCTGGCACCTTACAATAAGATTATGTATACTTT  
>HPV75\_Beta\_2911544\_nt457\_AOS\_rc|1  
ATCCAAACGTTTCAGACAAAACCTGGCACCTTACAATAAGATTATGTATACTTTCTGCTGC  
>HPV76\_Beta\_2911551\_nt4801\_AOS\_rc|1  
TGGCCACCTGAGCCACTGGTAACTACAATTTGGTCTGACAATGCGGATTCCCCTAGTGTT  
>HPV76\_Beta\_2911551\_nt3933\_AOS\_rc|1  
AACATTTTACTAATCCCTTCTTATTTTTTTTATCTCTGTATCTAAAGCATTTCAACACAT  
>HPV76\_Beta\_2911551\_nt471\_AOS\_rc|1  
AGTTTTTCAAATAAATCCAGGCGTTTCAAACAAAATTGACACCTTATTATAATGTTTCGCT  
>HPV76\_Beta\_2911551\_nt464\_AOS\_rc|1  
CAAATAAATCCAGGCGTTTCAAACAAAATTGACACCTTATTATAATGTTTCGCTATATTTT  
>HPV76\_Beta\_2911551\_nt457\_AOS\_rc|1  
ATCCAGGCGTTTCAAACAAAATTGACACCTTATTATAATGTTTCGCTATATTTTCTGCAGC  
>HPV77\_Alpha\_2911558\_nt6600\_AOS\_rc|2  
TATATAGCACTGCCGGGAGTCTCACGCCCCTACTCCCTTTGAGGTACAAAGATTCTGGA  
>HPV77\_Alpha\_2911558\_nt6593\_AOS\_rc|2  
CACTGCCGGGAGTCTCACGCCCCTACTCCCTTTGAGGTACAAAGATTCTGGAATTTTGT  
>HPV77\_Alpha\_2911558\_nt5590\_AOS\_rc|1  
GTGCAGAAGAAGGCAAAACAATGTCGGGGCCAGTGTGTAAATGCACATCCACCGGAGATA  
>HPV77\_Alpha\_2911558\_nt5583\_AOS\_rc|1  
AGAAGGCAAAACAATGTCGGGGCCAGTGTGTAAATGCACATCCACCGGAGATATAAATGG  
>HPV77\_Alpha\_2911558\_nt5489\_AOS\_rc|1  
GAAGGGAGGGAGGACGATGCACCGCGACCCCCAAAAGAGGTAAGATTGCGACCACTGTTC  
>HPV77\_Alpha\_2911558\_nt5482\_AOS\_rc|1  
GGGAGGACGATGCACCGCGACCCCCAAAAGAGGTAAGATTGCGACCACTGTTCGTAAAGG  
>HPV77\_Alpha\_2911558\_nt5474\_AOS\_rc|1  
GATGCACCGCGACCCCCAAAAGAGGTAAGATTGCGACCACTGTTCGTAAAGGCCACGTCA  
>HPV77\_Alpha\_2911558\_nt346\_AOS\_rc|1  
CATCTGATTGCTGGGTATCTATGGATTCTTTTGTCTGCCTCCACGCCGTCCACGTAG  
>HPV77\_Alpha\_2911558\_nt327\_AOS\_rc|1  
CTATGGATTCTTTTGTCTGCCTCCACGCCGTCCACGTAGTATGAATACTCCCAGTGTT  
>HPV80\_Beta\_2911565\_nt3917\_AOS\_rc|1

GTTAATAAAAAAGCTGTCTCTCAGTGTTTGAAGTAAATGCAAGTAACATCCGTGAACGTCC  
>HPV80\_Beta\_2911565\_nt5460\_AOS\_rc|2  
ATTTCTAGGAGACTCAAATCGAGGAAGTGTGTATGTAGTAGTACTACGCCTTGCAATTACC  
>HPV80\_Beta\_2911565\_nt5453\_AOS\_rc|1  
GGAGACTCAAATCGAGGAAGTGTGTATGTAGTAGTACTACGCCTTGCAATTACCAAATACT  
>HPV80\_Beta\_2911565\_nt3927\_AOS\_rc|1  
ATTTTCATTATGTTAATAAAAAAGCTGTCTCTCAGTGTTTGAAGTAAATGCAAGTAACATCC  
>HPV80\_Beta\_2911565\_nt1628\_AOS\_rc|1  
GCGGTTTCAGCTATTATTTGTACTTCTGATACTTGCAAAAGATTAGTTAGCAATCTTAATA  
>HPV80\_Beta\_2911565\_nt1489\_AOS\_rc|1  
ACAATGCTGAATTAAAAGTTGTTTGGAACTTTCTAATAGTTCGTCTTGACAGCATAACAC  
>HPV80\_Beta\_2911565\_nt1482\_AOS\_rc|1  
TGAATTAAAAGTTGTTTGGAACTTTCTAATAGTTCGTCTTGACAGCATAACACAGTTAAT  
>HPV80\_Beta\_2911565\_nt448\_AOS\_rc|1  
AAATTTGCAACGAATAGTAATGTCTCCAACAGCTTTTCGCTCAACTACCTCAATCTCCCA  
>HPV80\_Beta\_2911565\_nt440\_AOS\_rc|2  
AACGAATAGTAATGTCTCCAACAGCTTTTCGCTCAACTACCTCAATCTCCCAACCACACA  
>HPV80\_Beta\_2911565\_nt311\_AOS\_rc|1  
AGACAAAGTCTTCTCAGTCCAAATCAACTGCAAAACATTTGCGATCAAAACTTACTAACT  
>HPVRTRX7\_Unclassified\_30315616\_nt6990\_AOS\_rc|3  
CTAAACTTTTGTGAGTCATATGATTGTATTGCTGTATATCTTGATTTTCACTAGATATA  
>HPVRTRX7\_Unclassified\_30315616\_nt5521\_AOS\_rc|1  
GATTTTCTGCTGTATCCATGTCTATGAACGTACTTTCCACAGTACCTTGATGATGGTCG  
>HPVRTRX7\_Unclassified\_30315616\_nt5122\_AOS\_rc|1  
CTACTTGTACTTGCTGAACTAACCTTCTATTTGTTAGAGAAGGCCCCCTACGCCTGCCAA  
>HPVRTRX7\_Unclassified\_30315616\_nt5110\_AOS\_rc|1  
GCTGAACTAACCTTCTATTTGTTAGAGAAGGCCCCCTACGCCTGCCAATGGATAGTGCTC  
>HPVRTRX7\_Unclassified\_30315616\_nt5095\_AOS\_rc|1  
TATTTGTTAGAGAAGGCCCCCTACGCCTGCCAATGGATAGTGCTCTTTGAAGTGGTGTGC  
>HPVRTRX7\_Unclassified\_30315616\_nt5087\_AOS\_rc|1  
AGAGAAGGCCCCCTACGCCTGCCAATGGATAGTGCTCTTTGAAGTGGTGTGCTACTGCGC  
>HPVRTRX7\_Unclassified\_30315616\_nt3798\_AOS\_rc|1  
ATCTACCCCGTCGCTTTTCTGTTCCCTACCGCACCCCTACAGCTCCTACTTCCTCTTT  
>HPVRTRX7\_Unclassified\_30315616\_nt3625\_AOS\_rc|1  
CGACCTGCCTTCGGCTGGAGGTACTTCTGGGATTGTGATCTGGATTCTGACCTCCGACTC  
>HPVRTRX7\_Unclassified\_30315616\_nt3618\_AOS\_rc|1  
CCTTCGGCTGGAGGTACTTCTGGGATTGTGATCTGGATTCTGACCTCCGACTCCTAGTCT  
>HPVRTRX7\_Unclassified\_30315616\_nt3610\_AOS\_rc|1  
TGGAGGTACTTCTGGGATTGTGATCTGGATTCTGACCTCCGACTCCTAGTCTTGAGAGACC  
>HPV65\_Gamma\_312100\_nt6175\_AOS\_rc|2  
GAGTGCCATATATATATGTGGACCTAAAGTATTCTGATCCTGACCTTCTTGAGCAGGAA  
>HPV65\_Gamma\_312100\_nt6168\_AOS\_rc|1  
TATATATATATGTGGACCTAAAGTATTCTGATCCTGACCTTCTTGAGCAGGAATCCAGTA  
>HPV65\_Gamma\_312100\_nt5090\_AOS\_rc|1  
ATAAATCGGAGCCTACATCATCAACATAAATTCTCAAGCCTAAACCAGGAGGAATAGTGG  
>HPV65\_Gamma\_312100\_nt5079\_AOS\_rc|1  
CCTACATCATCAACATAAATTCTCAAGCCTAAACCAGGAGGAATAGTGGGGATACTGAAT  
>HPV65\_Gamma\_312100\_nt5072\_AOS\_rc|1  
CATCAACATAAATTCTCAAGCCTAAACCAGGAGGAATAGTGGGGATACTGAATGAAGATC  
>HPV65\_Gamma\_312100\_nt5038\_AOS\_rc|1  
AATAGTGGGGATACTGAATGAAGATCCACGTCTACTGCTAGTTAAAACCAAGTGAGAGTT  
>HPV65\_Gamma\_312100\_nt5031\_AOS\_rc|1  
GGGATACTGAATGAAGATCCACGTCTACTGCTAGTTAAAACCAAGTGAGAGTTGCTAAAA  
>HPV65\_Gamma\_312100\_nt3680\_AOS\_rc|2  
AAAGAACCATAGGTATATGTACAGAGTTTTGGGAATAGATTGTGTTTAAACAAATGAGTCT

>HPV65\_Gamma\_312100\_nt350\_AOS\_rc|1  
ACAACATATACATCTGATGCAAATCTCCTTAATTTTCCTTTGAGCTACTTCTTCCAAATT  
>HPV67\_Alpha\_3228267\_nt7475\_AOS\_rc|1  
CAAGTAAAGGCATTGCACTGCAGGAAGACAAAAGATTAACAATGTTGGCAAGAAACCTAGA  
>HPV67\_Alpha\_3228267\_nt7466\_AOS\_rc|1  
GCATTGCACTGCAGGAAGACAAAGATTAACAATGTTGGCAAGAAACCTAGAATACCAAAA  
>HPV67\_Alpha\_3228267\_nt7459\_AOS\_rc|1  
ACTGCAGGAAGACAAAGATTAACAATGTTGGCAAGAAACCTAGAATACCAAAAACCCATG  
>HPV67\_Alpha\_3228267\_nt5406\_AOS\_rc|1  
ACAATATCGGGACCTGGCTGTAATGGTACAGTAGAGGAAAATGGAAAATCAAAACCACTA  
>HPV67\_Alpha\_3228267\_nt5381\_AOS\_rc|1  
GTACAGTAGAGGAAAATGGAAAATCAAAACCACTACTTAAGGGGACAGTAACATTGGTGG  
>HPV67\_Alpha\_3228267\_nt5370\_AOS\_rc|1  
GAAAATGGAAAATCAAAACCACTACTTAAGGGGACAGTAACATTGGTGGTCTGAGGACTA  
>HPV67\_Alpha\_3228267\_nt5363\_AOS\_rc|1  
GAAAATCAAAACCACTACTTAAGGGGACAGTAACATTGGTGGTCTGAGGACTATGTAATG  
>HPV67\_Alpha\_3228267\_nt5356\_AOS\_rc|1  
AAAACCACTACTTAAGGGGACAGTAACATTGGTGGTCTGAGGACTATGTAATGAATAGGA  
>HPV67\_Alpha\_3228267\_nt5349\_AOS\_rc|1  
CTACTTAAGGGGACAGTAACATTGGTGGTCTGAGGACTATGTAATGAATAGGATATTGAT  
>HPV67\_Alpha\_3228267\_nt5316\_AOS\_rc|1  
GGACTATGTAATGAATAGGATATTGATGGCTGTGGAAAGGGTGTGTCAGGATCCATATAT  
>HPV11\_Alpha\_333026\_nt4950\_AOS\_rc|1  
AACAAAAGTGTCTAGTGGAATGTCTTCTACATGTTGGGATGTTATTGTTGGGGCAGATAT  
>HPV11\_Alpha\_333026\_nt4942\_AOS\_rc|1  
TGTCTAGTGGAATGTCTTCTACATGTTGGGATGTTATTGTTGGGGCAGATATAAGTATGT  
>HPV11\_Alpha\_333026\_nt4934\_AOS\_rc|1  
GGAATGTCTTCTACATGTTGGGATGTTATTGTTGGGGCAGATATAAGTATGTGACCACTG  
>HPV11\_Alpha\_333026\_nt4852\_AOS\_rc|1  
GTATTACAGACGGTCTGTAAACAGGGGATTTTGAAACACACTAGTGGTAGTGTGATTGG  
>HPV11\_Alpha\_333026\_nt4343\_AOS\_rc|1  
CGTACACCACACACTGTATAAAAAAGGTTTACTCTAGTTCATGTACACATAATCTCCATT  
>HPV11\_Alpha\_333026\_nt4258\_AOS\_rc|1  
TCCACAGTAGTATTGCGGTTTGATTTACACTTAGCACATTTAGTTTTTTCAGTACCATGT  
>HPV11\_Alpha\_333026\_nt3126\_AOS\_rc|1  
TTGGCATCTACGGAAGTAGTTACTTTTACCCATGAGTCGTTGTCCTGCAGGTATATATGT  
>HPV11\_Alpha\_333026\_nt446\_AOS\_rc|1  
ACCCTTCCACTGGTTATTTAGTTTTATGAAGCGTGCCTTTCCCAATATGTGCTTTAGTTT  
>HPV11\_Alpha\_333026\_nt439\_AOS\_rc|1  
CACTGGTTATTTAGTTTTATGAAGCGTGCCTTTCCCAATATGTGCTTTAGTTTTCTATT  
>HPV11\_Alpha\_333026\_nt425\_AOS\_rc|1  
TTTTATGAAGCGTGCCTTTCCCAATATGTGCTTTAGTTTTTCTATTTACACAACGGCTT  
>HPV31\_Alpha\_333048\_nt7740\_AOS\_rc|2  
GGCAGTTTAAACATGTGCAAAAGCCAGCACTGCAATCAAGGATATAGATAATCTACAAAA  
>HPV31\_Alpha\_333048\_nt7529\_AOS\_rc|1  
AAACTACAAGCCAGAATGTTGGCAAAACTAGTATTCAGGAAACCAAAAACCGCAGAACT  
>HPV31\_Alpha\_333048\_nt7421\_AOS\_rc|1  
ACGGTTAGGGATTTAAAATGGCTGCATAAAATCAAATGGAGTAGCTTTAGTTGCAAAAA  
>HPV31\_Alpha\_333048\_nt7414\_AOS\_rc|1  
GGGATTTAAAATGGCTGCATAAAATCAAATGGAGTAGCTTTAGTTGCAAAAAACGGACC  
>HPV31\_Alpha\_333048\_nt7407\_AOS\_rc|1  
AAAATGGCTGCATAAAATCAAATGGAGTAGCTTTAGTTGCAAAAAACGGACCGGGTGTA  
>HPV31\_Alpha\_333048\_nt7400\_AOS\_rc|1  
CTGCATAAAATCAAATGGAGTAGCTTTAGTTGCAAAAAACGGACCGGGTGTAACAATTT  
>HPV31\_Alpha\_333048\_nt7330\_AOS\_rc|1

TGACACCTAAATTATAGGCAGAAATAAGTACATGACTATTGGGAGGAGCAGGAACAAGTA  
>HPV31\_Alpha\_333048\_nt7322\_AOS\_rc|1  
AAATTATAGGCAGAAATAAGTACATGACTATTGGGAGGAGCAGGAACAAGTAGGAACAAG  
>HPV31\_Alpha\_333048\_nt7309\_AOS\_rc|1  
AAATAAGTACATGACTATTGGGAGGAGCAGGAACAAGTAGGAACAAGTAGGAACAATAGT  
>HPV31\_Alpha\_333048\_nt7299\_AOS\_rc|1  
ATGACTATTGGGAGGAGCAGGAACAAGTAGGAACAAGTAGGAACAATAGTTTATAAAATA  
>HPV33\_Alpha\_333049\_nt5467\_AOS\_rc|1  
AGTCAGCACCGTCTACAACAATGGTGTCAAAAAGGAAAAAAGGCGAAATAGGAACAAATG  
>HPV33\_Alpha\_333049\_nt5459\_AOS\_rc|1  
CCGTCTACAACAATGGTGTCAAAAAGGAAAAAAGGCGAAATAGGAACAAATGGGCTAGAT  
>HPV33\_Alpha\_333049\_nt3904\_AOS\_rc|1  
CAATACCAACACCAGCAACCAAGCATAGGTAGAAATGGAAAGTATTAAAGGACGTAATAA  
>HPV33\_Alpha\_333049\_nt3891\_AOS\_rc|1  
AGCAACCAAGCATAGGTAGAAATGGAAAGTATTAAAGGACGTAATAATAAGGATAAGCAT  
>HPV33\_Alpha\_333049\_nt1391\_AOS\_rc|1  
TAGAACATTACTAATTTCCCTGCAACGTAACATTTTCACAGCTATCTACATTTGTCTCACA  
>HPV33\_Alpha\_333049\_nt1384\_AOS\_rc|1  
TTACTAATTTCCCTGCAACGTAACATTTTCACAGCTATCTACATTTGTCTCACAGCTTACT  
>HPV33\_Alpha\_333049\_nt1377\_AOS\_rc|1  
TTTCCTGCAACGTAACATTTTCACAGCTATCTACATTTGTCTCACAGCTTACTTCTGAAT  
>HPV33\_Alpha\_333049\_nt1370\_AOS\_rc|1  
CAACGTAACATTTTCACAGCTATCTACATTTGTCTCACAGCTTACTTCTGAATCATCCCC  
>HPV33\_Alpha\_333049\_nt170\_AOS\_rc|1  
TCAGATCGTTGCAAAGGTTTTTTGCATTCCACGCACTGTAGTTCAATGTTGTGTATAGTT  
>HPV33\_Alpha\_333049\_nt160\_AOS\_rc|2  
GCAAAGGTTTTTTGCATTCCACGCACTGTAGTTCAATGTTGTGTATAGTTGTCTCCAATG  
>HPV35\_Alpha\_333050\_nt7790\_AOS\_rc|1  
TTGTTACTAACTATAATAAAAAGAAATGCTTATAAAACTGTAATCCAAATCGGTTGGACA  
>HPV35\_Alpha\_333050\_nt7782\_AOS\_rc|1  
AACTATAATAAAAAGAAATGCTTATAAAACTGTAATCCAAATCGGTTGGACACACCTGTG  
>HPV35\_Alpha\_333050\_nt7544\_AOS\_rc|1  
CAAGTGTGGGTGGACCACAAGTATGAAAAATGACTAATACTGCAAGATGAATCAAGTTTA  
>HPV35\_Alpha\_333050\_nt5390\_AOS\_rc|1  
AGTTAGTAATAGTATTAGAGTTAAATACAATGTCTGGCCCTGCTGTTATAGGAATATCAT  
>HPV35\_Alpha\_333050\_nt5379\_AOS\_rc|1  
GTATTAGAGTTAAATACAATGTCTGGCCCTGCTGTTATAGGAATATCATAGCCACTACTT  
>HPV35\_Alpha\_333050\_nt5362\_AOS\_rc|1  
AATGTCTGGCCCTGCTGTTATAGGAATATCATAGCCACTACTTAATGGTATAGTAGTATT  
>HPV35\_Alpha\_333050\_nt5168\_AOS\_rc|1  
TATGTGGTAAAGAGGATGGTACATGTTGTAAGGGTTGTAATTCTATATCTTCAGTAATAC  
>HPV35\_Alpha\_333050\_nt3942\_AOS\_rc|1  
CATCCATAGGTATATACAAAAGCAAGAAACAACAAAAGCAAGTAGTGGTGTGCTACAGT  
>HPV47\_Beta\_333062\_nt7658\_AOS\_rc|1  
TCTTGTAGTGCCAAAACAGCTGCCCCGGTGCCAAATGTGATCGCCAAAAACGATAACAA  
>HPV47\_Beta\_333062\_nt7644\_AOS\_rc|1  
AACAGCTGCCCCGGTGCCAAATGTGATCGCCAAAAACGATAACAAGATTAAATTTCTTT  
>HPV47\_Beta\_333062\_nt6964\_AOS\_rc|1  
AAAATTGTCTGCATTATAATCCTGTATATCCTTTATGTCCCCTGCCTGAGAGTAAACAGA  
>HPV47\_Beta\_333062\_nt6954\_AOS\_rc|1  
GCATTATAATCCTGTATATCCTTTATGTCCCCTGCCTGAGAGTAAACAGAGATGCTGAAA  
>HPV47\_Beta\_333062\_nt6944\_AOS\_rc|1  
CCTGTATATCCTTTATGTCCCCTGCCTGAGAGTAAACAGAGATGCTGAAATTTGTATTTT  
>HPV47\_Beta\_333062\_nt5758\_AOS\_rc|1  
GGTGTGAATGACAACACTACAGGTAATTCAGGTGTAGGGTAAATAATATCAATAGTGTCCCCG



>HPV47\_Beta\_333062\_nt5540\_AOS\_rc|2  
GTAAATCATTAGATGAAGCATCTATTGTTTCAGATAAAGGGTTTTTCAGCAATGTCCATAT  
>HPV47\_Beta\_333062\_nt4972\_AOS\_rc|1  
TCTGCTTGGAACCTCAGTAAGTTCAATTTCTGTCTGTTATATCACCGCCTATCCTTTGTCC  
>HPV47\_Beta\_333062\_nt2934\_AOS\_rc|1  
CTCCAAAGCAAACGCTGATTTTTGTAGCGACTCTAACTGCAACACCATATATATAGCCTC  
>HPV47\_Beta\_333062\_nt2925\_AOS\_rc|1  
AAACGCTGATTTTTGTAGCGACTCTAACTGCAACACCATATATATAGCCTCTTTGGCCCT  
>HPV8\_Beta\_333074\_nt6929\_AOS\_rc|1  
CTCAGATATTCTCTGAAGTGGGTTGATTTATAGTCTGTGATGTTCTTAAGTTCCCCATTT  
>HPV8\_Beta\_333074\_nt6913\_AOS\_rc|2  
ACTGGGTTGATTTATAGTCTGTGATGTTCTTAAGTTCCCCATTTTCAGTGTAAGTGAAG  
>HPV8\_Beta\_333074\_nt5718\_AOS\_rc|1  
CACTGTTATCATGTGTGTGGATTATTACCACCGGAAGATCAGGTGTAGGGTAAATTATTT  
>HPV8\_Beta\_333074\_nt5711\_AOS\_rc|1  
ATCATGTGTGTGGATTATTACCACCGGAAGATCAGGTGTAGGGTAAATTATTTCTCATT  
>HPV8\_Beta\_333074\_nt5701\_AOS\_rc|1  
TGGATTATTACCACCGGAAGATCAGGTGTAGGGTAAATTATTTCTCATTATTGCGACTT  
>HPV8\_Beta\_333074\_nt4842\_AOS\_rc|1  
CTAAAATGTGGTCTGCTAGAGAACCTTCTCCTTGTGTAGGTGTGGAATCAGTTATGATTT  
>HPV8\_Beta\_333074\_nt514\_AOS\_rc|1  
AATCTAATTTCTCTATGATATCCAAAAATGACAAGCAGTTTTGACACCTAACGTCTATCT  
>HPV8\_Beta\_333074\_nt350\_AOS\_rc|1  
CAACACGCAGTAACAACGTAATTTTTTCCAAATTAGGCACAGTCTCTTTTTGTCAAACCTCA  
>HPV8\_Beta\_333074\_nt336\_AOS\_rc|1  
AACGTAATTTTTTCCAAATTAGGCACAGTCTCTTTTTGTCAAACCTCACACAGTTCTAAGAA  
>HPV8\_Beta\_333074\_nt149\_AOS\_rc|1  
TCCTGCCCGTCCATTTGCTTAGGAAAATTGCACAAGTCACAGCATTGTAACAATATATAT  
>HPV51\_Alpha\_333087\_nt6553\_AOS\_rc|1  
TAATATATTGCTTAAAGTTACTTGGAGTAAATGTTGGGGAAACCGCAGCAGTGGCAGTGC  
>HPV51\_Alpha\_333087\_nt7439\_AOS\_rc|1  
CGGATGTATGCACATATGTCATAAAAAAATGATGGTTTATGCCAAAAACAACCTGGCAGTTG  
>HPV51\_Alpha\_333087\_nt7397\_AOS\_rc|1  
AAAAACAACCTGGCAGTTGTGGTTTTAAACTTGGCAAATATACTAAAAGTACACGAACCGA  
>HPV51\_Alpha\_333087\_nt7333\_AOS\_rc|1  
GGTTGCACTCAAAATGGCTGCAGCTGTAACAAAATGGAAGCTACAAAGTATAACTAAATA  
>HPV51\_Alpha\_333087\_nt7316\_AOS\_rc|1  
CTGCAGCTGTAACAAAATGGAAGCTACAAAGTATAACTAAATAGCACAAATATAAACTGT  
>HPV51\_Alpha\_333087\_nt5906\_AOS\_rc|1  
TCAACAGATGTGTTATCTCTAACATCTTGTGTGCATTGCCATTTGCTATGCGTGAATTT  
>HPV51\_Alpha\_333087\_nt3729\_AOS\_rc|1  
GTCATAATTCCCAATGACAGTGTACACTTGGGGGTACTTTAATGGTTTTTATAAATGTT  
>HPV51\_Alpha\_333087\_nt3722\_AOS\_rc|1  
TTCCCAATGACAGTGTACACTTGGGGGTACTTTAATGGTTTTTATAAATGTTTCCCGTT  
>HPV51\_Alpha\_333087\_nt3701\_AOS\_rc|1  
TTGGGGGTACTTTAATGGTTTTTATAAATGTTTCCCGTTGATGTGCACTGTCAAACACAA  
>HPV51\_Alpha\_333087\_nt2540\_AOS\_rc|2  
TTTAAAACTTTAATACTGTTACCTTGTATGTAAATACATTAGGTTTGCATCCTCTTGT  
>HPV42\_Alpha\_333211\_nt7478\_AOS\_rc|1  
TGAATAGGTTTGCAAAATGTTAGGAAACATGGCCAATGCACCTGGTAACAGGCCAGATAC  
>HPV42\_Alpha\_333211\_nt7090\_AOS\_rc|1  
ATCCTTTTTTTCTGGCGTTGTTACCTTAGCCTGACAGCGAATAGCTTCTGATTGTACATA  
>HPV42\_Alpha\_333211\_nt5963\_AOS\_rc|1  
TGGGGATAGATGTCTTATTTGGCCTTTTTGTAAATAGAGTAATAAGGGTGACCAACAACCA  
>HPV42\_Alpha\_333211\_nt5603\_AOS\_rc|1

GGAAACGAAAAAGGTATGGTGGTATTGGCAGAATGTGTAGACATGCTAGGTAATGTAGGG  
>HPV42\_Alpha\_333211\_nt5035\_AOS\_rc|1  
ACGACCGAGGGCCAGGAATGGGAGTACTAGTAAATGTGTTAGTTGTATCTGTAGATACAA  
>HPV42\_Alpha\_333211\_nt4856\_AOS\_rc|1  
AAAGGATTGGTAGATGTAGTTGTTGTGACACGTATAGTATTAGTGGGAGGGGAGATATCT  
>HPV42\_Alpha\_333211\_nt4389\_AOS\_rc|1  
TCGTCTGCGGGACCGTTGTGGTGGCATTGTAATAGCACAAAAGAAGTACACACAATATAA  
>HPV42\_Alpha\_333211\_nt4382\_AOS\_rc|1  
CGGGACCGTTGTGGTGGCATTGTAATAGCACAAAAGAAGTACACACAATATAACAAAAGT  
>HPV42\_Alpha\_333211\_nt4110\_AOS\_rc|1  
GACAGAAGGAATACCAAGAATGATTAAACATAGAAAAAATAGTCAAAGTATGTTAGTAC  
>HPV39\_Alpha\_333245\_nt7375\_AOS\_rc|1  
TAAATGTAGAAACGCATACAACAATGTAAAAATTACATATTAGGTAGTAAACACACCTT  
>HPV39\_Alpha\_333245\_nt6450\_AOS\_rc|1  
ATACAGAACTACCGGGGTTTGCACGTATATCTGTGCCCTTAATATACAATTGGGCAGGAA  
>HPV39\_Alpha\_333245\_nt5491\_AOS\_rc|1  
ATATGTTGTGTCTATTGGTCCAGAAGGCACCAATGGCAACTGTGGAGTAGTACTTGGTAA  
>HPV39\_Alpha\_333245\_nt5377\_AOS\_rc|1  
AGTTGTATTGGCATATTTAGTAGATGCTGAAGAAGCCACAGAAGGTAGTGAGCCTGTGTT  
>HPV39\_Alpha\_333245\_nt5370\_AOS\_rc|1  
TTGGCATATTTAGTAGATGCTGAAGAAGCCACAGAAGGTAGTGAGCCTGTGTTATATGTA  
>HPV39\_Alpha\_333245\_nt5348\_AOS\_rc|1  
AAGAAGCCACAGAAGGTAGTGAGCCTGTGTTATATGTAGTGCCCGAATCCCTTGTATTAT  
>HPV39\_Alpha\_333245\_nt5341\_AOS\_rc|1  
CACAGAAGGTAGTGAGCCTGTGTTATATGTAGTGCCCGAATCCCTTGTATTATTAAATGC  
>HPV39\_Alpha\_333245\_nt5245\_AOS\_rc|1  
TATATCAAATAATGCATCTGAAGCATCAGAGGGCTCAGCGTGAAGTAGGGGCTGTAATTC  
>HPV39\_Alpha\_333245\_nt1211\_AOS\_rc|1  
GAAATTTCCCTGTAGTGTTCCCTGGTATTCCTGCCTACTTTTTTTCCATACGGTCTAGTG  
>HPV93\_Beta\_37089393\_nt4383\_AOS\_rc|1  
AAGTTTCTGTTAATGGAACAATTGAAGATGAGGATGGTTCTACAGGAGCTATGGTATCTA  
>HPV93\_Beta\_37089393\_nt402\_AOS\_rc|1  
CAATTTGATCTAATTTTTTTCATACAATGGCGACACCTCACTATAATTTTCAGAGAGTGGCT  
>HPV93\_Beta\_37089393\_nt395\_AOS\_rc|1  
ATCTAATTTTTTTCATACAATGGCGACACCTCACTATAATTTTCAGAGAGTGGCTTTTTTTC  
>HPV93\_Beta\_37089393\_nt388\_AOS\_rc|1  
TTTTTTCATACAATGGCGACACCTCACTATAATTTTCAGAGAGTGGCTTTTTTTCCTTAAC  
>HPV93\_Beta\_37089393\_nt350\_AOS\_rc|1  
GAGTGGCTTTTTTTCCTTAACCTTCTATTGCCAGCCAACAACACTATCATTCAAGTAATT  
>HPV93\_Beta\_37089393\_nt90\_AOS\_rc|1  
GAGGTTTACTTACTGCCGCCATTAAGATGTCTGCCTTATATACCATATATCAATACTTAT  
>HPV93\_Beta\_37089393\_nt83\_AOS\_rc|1  
ACTTACTGCCGCCATTAAGATGTCTGCCTTATATACCATATATCAATACTTATAAACAGG  
>HPV93\_Beta\_37089393\_nt75\_AOS\_rc|1  
CCGCCATTAAGATGTCTGCCTTATATACCATATATCAATACTTATAAACAGGTGCTACGA  
>HPV12\_Beta\_396910\_nt6365\_AOS\_rc|2  
GAAAGTGTCTTTAACTCTATGGGAGGGCAAACACCATTTTCAGCTGGTGCATCCCCGCA  
>HPV12\_Beta\_396910\_nt6358\_AOS\_rc|3  
TTCTTTAACTCTATGGGAGGGCAAACACCATTTTCAGCTGGTGCATCCCCGCAGGGTAAG  
>HPV12\_Beta\_396910\_nt6351\_AOS\_rc|2  
ACTCTATGGGAGGGCAAACACCATTTTCAGCTGGTGCATCCCCGCAGGGTAAGGCTTTCT  
>HPV12\_Beta\_396910\_nt5094\_AOS\_rc|1  
AAATGAAAAGCGTACTAACTTAGAAGGTTTATCTATAAATAAAGGATTATCAACTTGCAC  
>HPV12\_Beta\_396910\_nt5087\_AOS\_rc|1  
AAGCGTACTAACTTAGAAGGTTTATCTATAAATAAAGGATTATCAACTTGCACCTTGTGT

>HPV12\_Beta\_396910\_nt5032\_AOS\_rc|1  
GTTGTACTAGCCTTCTATTTGTTAGGGACACTCCTCTACGTCGGCCAGTGGTTTGTGTCC  
>HPV12\_Beta\_396910\_nt5021\_AOS\_rc|1  
CTTCTATTTGTTAGGGACACTCCTCTACGTCGGCCAGTGGTTTGTGTCTCTGAAGTGGA  
>HPV12\_Beta\_396910\_nt5014\_AOS\_rc|1  
TTGTTAGGGACACTCCTCTACGTCGGCCAGTGGTTTGTGTCTCTGAAGTGGAGTGCTGC  
>HPV12\_Beta\_396910\_nt5007\_AOS\_rc|1  
GGACACTCCTCTACGTCGGCCAGTGGTTTGTGTCTCTGAAGTGGAGTGCTGCTTTGCCG  
>HPV12\_Beta\_396910\_nt4868\_AOS\_rc|1  
CCTATAGTTTGACCTCCTGAGCCAGATGTGACCAGGATGTGGTCTGCCAAAGATGTTTCA  
>HPV14D\_Beta\_396918\_nt5444\_AOS\_rc|1  
TAATGACAACAGGCAACTCTGGGGTAGGATAAATAATATCCATGCTAATGTCCCTATCCT  
>HPV14D\_Beta\_396918\_nt5362\_AOS\_rc|1  
TTTTGTATCCTGTGCATAATATGACCCAGATCTGGTTGTTTCAAAACGAGGGACGGTATA  
>HPV14D\_Beta\_396918\_nt5347\_AOS\_rc|1  
ATAATATGACCCAGATCTGGTTGTTTCAAAACGAGGGACGGTATATGAAGATGTTGAGCG  
>HPV14D\_Beta\_396918\_nt5340\_AOS\_rc|2  
GACCCAGATCTGGTTGTTTCAAAACGAGGGACGGTATATGAAGATGTTGAGCGTCGATTA  
>HPV14D\_Beta\_396918\_nt5326\_AOS\_rc|1  
TGTTTCAAAACGAGGGACGGTATATGAAGATGTTGAGCGTCGATTACCCACAACATAATTG  
>HPV14D\_Beta\_396918\_nt4834\_AOS\_rc|1  
TTGCACTAGTCTAGATGGTCTTGTTAAAAATAAGGGTTTTCTACAGAACTTGTGGAC  
>HPV14D\_Beta\_396918\_nt4598\_AOS\_rc|1  
CAGAGGTAACCAATATATTGTCTGCTAATGAACTTTCACCTGTGGTAGGGGTGGATTCCG  
>HPV14D\_Beta\_396918\_nt4591\_AOS\_rc|1  
AACCAATATATTGTCTGCTAATGAACTTTCACCTGTGGTAGGGGTGGATTCCGTAATTAC  
>HPV14D\_Beta\_396918\_nt4580\_AOS\_rc|2  
TGTCTGCTAATGAACTTTCACCTGTGGTAGGGGTGGATTCCGTAATTACTTGAAAGGAG  
>HPV14D\_Beta\_396918\_nt2184\_AOS\_rc|1  
CAATCTAAAGAAACATAATGACCATCAAGGCCATTCTCAAATAAGTGTCCATATACAAC  
>HPV15\_Beta\_396924\_nt5489\_AOS\_rc|1  
TAGGCTACATTATACCCATGCACATCTTGATGTAAAACCCAGTATTTCTAGGTGATTCA  
>HPV15\_Beta\_396924\_nt6555\_AOS\_rc|1  
CTGTGGGAAAGTAAGTAGAATTTGCTAAGTTATTTTGTGTTGGGTTGATTGTGCTGGTA  
>HPV15\_Beta\_396924\_nt4900\_AOS\_rc|2  
AGGGTCGTCCCAAGAATAAAGGGTCTGTTACAGCTACTTGTTTCAGTCAGCCGTCTGTTAT  
>HPV15\_Beta\_396924\_nt3923\_AOS\_rc|1  
CAACGCCTGGTGGCAGTTTCATTATTTTGATAAAGAGCTCTCTTTTCGGTGTGGAAGAGA  
>HPV15\_Beta\_396924\_nt3911\_AOS\_rc|1  
GCAGTTTCATTATTTTGATAAAGAGCTCTCTTTCGGTGTGGAAGAGAATGCCAGTAACA  
>HPV15\_Beta\_396924\_nt3904\_AOS\_rc|1  
CATTATTTTGATAAAGAGCTCTCTTTCGGTGTGGAAGAGAATGCCAGTAACAATCGTGA  
>HPV15\_Beta\_396924\_nt3897\_AOS\_rc|1  
TTGATAAAGAGCTCTCTTTCGGTGTGGAAGAGAATGCCAGTAACAATCGTGAGCGTCCA  
>HPV15\_Beta\_396924\_nt3890\_AOS\_rc|1  
AGAGCTCTCTTTCGGTGTGGAAGAGAATGCCAGTAACAATCGTGAGCGTCCAATTCTAT  
>HPV15\_Beta\_396924\_nt441\_AOS\_rc|1  
CAGCGAATAATAATATCTCCAACAGGCTTCTGTTCTACTATCTCTATTTCCCAACTACAC  
>HPV15\_Beta\_396924\_nt434\_AOS\_rc|1  
TAATAATATCTCCAACAGGCTTCTGTTCTACTATCTCTATTTCCCAACTACACACCGACT  
>HPV17\_Beta\_396932\_nt5118\_AOS\_rc|1  
GAGTACGAATGCTGGCTCTTCTACCTAGTCTACTGACTCGTAAATAACCCTGAGGTGTTT  
>HPV17\_Beta\_396932\_nt5510\_AOS\_rc|1  
ATATGCTACTGTGTATCCCTGAGTGTATGTATGTAAAAGCCAGTGTCCCTAGGTGTTTC  
>HPV17\_Beta\_396932\_nt4842\_AOS\_rc|1

TTAAGCTTGATAGTGATTCTACTGCACGTTGAACTGGAGTACTTGTTCTAGGAGGTGTGC  
>HPV17\_Beta\_396932\_nt4719\_AOS\_rc|1  
TATCAATGGCTGCATTCCCTGGAACCTCCTATGTTTTGTCCACCAAAACCTTCGAACACTA  
>HPV17\_Beta\_396932\_nt3933\_AOS\_rc|1  
CTGGTGGTAGCTTCATTTTTTTGGATAAACAATTCTCTTTTCATCATATGTGTTAAATGCTA  
>HPV17\_Beta\_396932\_nt3926\_AOS\_rc|1  
TAGCTTCATTTTTTTGGATAAACAATTCTCTTTTCATCATATGTGTTAAATGCTAGTAACAT  
>HPV17\_Beta\_396932\_nt1825\_AOS\_rc|1  
TTCGTTATCATAAGCAAATTGTATCATGGTAGATAGATCGAATTGTGTTGCCTGTGCTGT  
>HPV17\_Beta\_396932\_nt1809\_AOS\_rc|1  
AATTGTATCATGGTAGATAGATCGAATTGTGTTGCCTGTGCTGTTTGATGATTAATCATA  
>HPV17\_Beta\_396932\_nt830\_AOS\_rc|1  
TCTCTGCAGTTAGGACACACCAACTGTACTTCACCTAATAAAAGCTCCTCTTGTGAACGA  
>HPV17\_Beta\_396932\_nt805\_AOS\_rc|1  
GTACTTCACCTAATAAAAGCTCCTCTTGTGAACGAATTCCAGCGTGCGTTGCAAGAACAA  
>HPV19\_Beta\_396940\_nt5585\_AOS\_rc|1  
GTTTCAAATTGGGGAACGTGTATATGTGGAAGTAGAACGGCGCCCACTACTAACTGT  
>HPV19\_Beta\_396940\_nt5272\_AOS\_rc|1  
GAATGGTTTCGCCTTTGGCCTAGGCGACTAACTCTGATGTAACCAGATGGTGTTTCTGAAT  
>HPV19\_Beta\_396940\_nt4150\_AOS\_rc|1  
AAATGAGCCAAACGATCGGTCCACACCTTTAGGATACCTTACTGTATCATCAAAGTGCTT  
>HPV19\_Beta\_396940\_nt488\_AOS\_rc|1  
AGACAGATTTACCTGTTACAAACTCAATTTCTCTACCTGTTACAGTATGCTCATAGAACT  
>HPV19\_Beta\_396940\_nt219\_AOS\_rc|1  
GGTGGCTCTGTGACCTGTGGTGCAGTAGTTCCCTCTTCTACAATTTCTATCTCTTCTTCT  
>HPV19\_Beta\_396940\_nt212\_AOS\_rc|1  
CTGTGACCTGTGGTGCAGTAGTTCCCTCTTCTACAATTTCTATCTCTTCTTCTGTAGCCT  
>HPV19\_Beta\_396940\_nt205\_AOS\_rc|1  
CTGTGGTGCAGTAGTTCCCTCTTCTACAATTTCTATCTCTTCTTCTGTAGCCTGTGCGTT  
>HPV19\_Beta\_396940\_nt198\_AOS\_rc|1  
GCAGTAGTTCCCTCTTCTACAATTTCTATCTCTTCTTCTGTAGCCTGTGCGTTAGCCATA  
>HPV19\_Beta\_396940\_nt191\_AOS\_rc|1  
TTCCCTCTTCTACAATTTCTATCTCTTCTTCTGTAGCCTGTGCGTTAGCCATAAGTTTGC  
>HPV19\_Beta\_396940\_nt183\_AOS\_rc|1  
TCTACAATTTCTATCTCTTCTTCTGTAGCCTGTGCGTTAGCCATAAGTTTGCAGCTGCAA  
>HPV25\_Beta\_396948\_nt3784\_AOS\_rc|1  
GGTGGGGGATTGAGACAATCTGTGTCGTCTCCCGCCCCTGCCGCGGCCCCCCTGCT  
>HPV25\_Beta\_396948\_nt5666\_AOS\_rc|1  
ATAGGACACATAGTATCCCTGAATATCTTGGGTATAATATGATGCAGAGCGTGTAGTTTC  
>HPV25\_Beta\_396948\_nt5037\_AOS\_rc|1  
ATCCTCCTCTACGTCTTAATGCAGTCCTAATCCTTTGAAGAGGTGTACTACTTTGTCTTG  
>HPV25\_Beta\_396948\_nt4737\_AOS\_rc|1  
CTAAAACTGCGCTGGCACCTCTAGAAGTTGTTGTCACCGGGGTGTCAGTGGAGGGTACAA  
>HPV25\_Beta\_396948\_nt3802\_AOS\_rc|1  
TCTTCGTGATCGCTTGGAGGTGGGGGATTGAGACAATCTGTGTCGTCTCCCGCCCCCT  
>HPV25\_Beta\_396948\_nt3777\_AOS\_rc|1  
GATTGAGACAATCTGTGTCGTCTCTCCCGCCCCCTGCCGCGGCCCCCCTGCTGCTCCCT  
>HPV25\_Beta\_396948\_nt475\_AOS\_rc|1  
AAAAATTGATTACCTGTAACGTCTTCAATTTCCCTACCTGTTACAGTGCTTTTCGTAAAA  
>HPV25\_Beta\_396948\_nt203\_AOS\_rc|1  
GTGGCTGTATAACCTGCGCTTGCTCTGGTGGTCCCTATGCTCTGTTTCAGCATTTGCAGTTG  
>HPV25\_Beta\_396948\_nt196\_AOS\_rc|1  
TATAACCTGCGCTTGCTCTGGTGGTCCCTATGCTCTGTTTCAGCATTTGCAGTTGCCATAAG  
>HPV25\_Beta\_396948\_nt189\_AOS\_rc|1  
TGCGCTTGCTCTGGTGGTCCCTATGCTCTGTTTCAGCATTTGCAGTTGCCATAAGTCCTAAT

>HPV27\_Alpha\_396964\_nt5475\_AOS\_rc|1  
CAGAGGAGGCAGATACCGTGGTATTAGCCAGGGAGCCGCGAGGGGCTGGGTAGTAATCGT  
>HPV27\_Alpha\_396964\_nt5893\_AOS\_rc|1  
TAGGCACTGCCAACCTATTATTGCTACCCTTCTTTATAGAATAATATGGGTGGCCGACAG  
>HPV27\_Alpha\_396964\_nt5468\_AOS\_rc|1  
GGCAGATACCGTGGTATTAGCCAGGGAGCCGCGAGGGGCTGGGTAGTAATCGTCCAATGG  
>HPV27\_Alpha\_396964\_nt4216\_AOS\_rc|1  
CAACAACAATAATAAGCCAATGAGGGTGAGAATCACCAACAGACAGTCAATATCATCACG  
>HPV30\_Alpha\_396973\_nt7587\_AOS\_rc|1  
TATATGACTAATAAGGCGAGGCGTCTTACGTTGCAAAAAAACATAAAGTGCAGGAAAC  
>HPV30\_Alpha\_396973\_nt7376\_AOS\_rc|1  
ATAAATATAAAAAGTAACTGCACAGTGGTGTGCAACAACCAAAAAGGGTGGAGGACATAG  
>HPV30\_Alpha\_396973\_nt7144\_AOS\_rc|1  
CATTCATGCACAATAAATAGTAAGGAAACATACACAGACACAAACAATCACCGCCGCTTG  
>HPV30\_Alpha\_396973\_nt7137\_AOS\_rc|1  
GCACAATAAATAGTAAGGAAACATACACAGACACAAACAATCACCGCCGCTTGCGTTTGG  
>HPV30\_Alpha\_396973\_nt6823\_AOS\_rc|1  
GTGGCAGCTGGGGGTGACAATCCAATATTCCAGCCCTCAAGTAAAGTGGAGTTCATAGTA  
>HPV30\_Alpha\_396973\_nt4719\_AOS\_rc|1  
ACTGGGGGTTCAACAAAGGAGGGATTGGTAAAAATGGGTACTACTAACATGGACAGAGCCA  
>HPV30\_Alpha\_396973\_nt4712\_AOS\_rc|1  
GTTCAACAAAGGAGGGATTGGTAAAAATGGGTACTACTAACATGGACAGAGCCAGTGGTAG  
>HPV30\_Alpha\_396973\_nt3139\_AOS\_rc|1  
TATATACCTTTGTAACTACTACAGAAAGGCACTTTAGTCCACCCATTGTCCCCACAGTAA  
>HPV30\_Alpha\_396973\_nt1356\_AOS\_rc|1  
ATTTGCTGTGGTGGCGTGGCGCCTATATCCATATCACTGTCTGCTTCTATGCTGTTTTCC  
>HPV30\_Alpha\_396973\_nt260\_AOS\_rc|1  
ATAAAATAATAAACAGAAATTGCACACTGCATATGGGCTGTCTCTCCCTATATACCAGTCT  
>HPV3\_Alpha\_397005\_nt5431\_AOS\_rc|1  
AGCACGGCCTCTAGACAGAGTGTCACTACGACCTCCAGATGTAAAACCTATGTCAGCATC  
>HPV3\_Alpha\_397005\_nt4264\_AOS\_rc|1  
AAAACATAGCAGTATAAAAGACGGTGGTACAATACCACACTAGGGCATATACATCAAGGA  
>HPV3\_Alpha\_397005\_nt4247\_AOS\_rc|1  
AAGACGGTGGTACAATACCACACTAGGGCATATACATCAAGGAAGAATACATACAGGTGA  
>HPV3\_Alpha\_397005\_nt4240\_AOS\_rc|2  
TGGTACAATACCACACTAGGGCATATACATCAAGGAAGAATACATACAGGTGACCTGCAA  
>HPV3\_Alpha\_397005\_nt4228\_AOS\_rc|1  
ACACTAGGGCATATACATCAAGGAAGAATACATACAGGTGACCTGCAACTACAACCTTAC  
>HPV3\_Alpha\_397005\_nt4218\_AOS\_rc|1  
ATATACATCAAGGAAGAATACATACAGGTGACCTGCAACTACAACCTTACAGGAGTCCCA  
>HPV3\_Alpha\_397005\_nt4134\_AOS\_rc|1  
TAAGTATGACAGCTAACATAAACAGCAATAATATGTACACGTCTCCAGGCTCAACAAACA  
>HPV3\_Alpha\_397005\_nt4127\_AOS\_rc|1  
GACAGCTAACATAAACAGCAATAATATGTACACGTCTCCAGGCTCAACAAACAAGACAAG  
>HPV3\_Alpha\_397005\_nt4119\_AOS\_rc|1  
ACATAAACAGCAATAATATGTACACGTCTCCAGGCTCAACAAACAAGACAAGATGGTCGC  
>HPV3\_Alpha\_397005\_nt2174\_AOS\_rc|1  
TTCCTTGTAGGAATGATTTTCAGAGCGCATAGAAATGGTATAAATTCTACGTCCTGGTACC  
>HPV40\_Alpha\_397014\_nt7524\_AOS\_rc|1  
AGCGGTTCGCGCAGTACAAAATGGAGGATTTAGACACAAAAAGTACATGGTCAACACTGAA  
>HPV40\_Alpha\_397014\_nt7517\_AOS\_rc|1  
GCGCAGTACAAAATGGAGGATTTAGACACAAAAAGTACATGGTCAACACTGAACAAGACG  
>HPV40\_Alpha\_397014\_nt7510\_AOS\_rc|1  
ACAAAATGGAGGATTTAGACACAAAAAGTACATGGTCAACACTGAACAAGACGCCATGAC  
>HPV40\_Alpha\_397014\_nt7502\_AOS\_rc|1

GAGGATTTAGACACAAAAAGTACATGGTCAACACTGAACAAGACGCCATGACACTGCCAT  
>HPV40\_Alpha\_397014\_nt5895\_AOS\_rc|1  
TGAAATGTCACCATTGGGTTTTTTTAACTCAAAGTATGGATGTCTATAGTCAGTAACCT  
>HPV40\_Alpha\_397014\_nt4030\_AOS\_rc|1  
ACAAAGCACAAAATGGAGATAGCAGACAGTATAGAGCTCCACACATACAGATTAGGGACA  
>HPV40\_Alpha\_397014\_nt4022\_AOS\_rc|1  
CAAAATGGAGATAGCAGACAGTATAGAGCTCCACACATACAGATTAGGGACACACACACA  
>HPV40\_Alpha\_397014\_nt3791\_AOS\_rc|1  
ACATACCCAAGCTATGTTTTATTGTTTTTGGTATTTTTTACAATAGCTAAGAAGTCAGACC  
>HPV40\_Alpha\_397014\_nt285\_AOS\_rc|1  
CGTATCTAAAGTTTCTGTATTGGTTTACTTTTCCGTGCAGGTCCAGGCACCGTGGACATG  
>HPV45\_Alpha\_397022\_nt7514\_AOS\_rc|1  
CGCGCCAGTAGGTTAACTATGTAGGGGTTGTAAATGTGCCAGTTTAGGTATTATGTTTA  
>HPV45\_Alpha\_397022\_nt7098\_AOS\_rc|1  
GCTAACATATTATTTCTTACTACGTATACGTACACGTTTGGCAGGCCTAGATGCAGTAGA  
>HPV45\_Alpha\_397022\_nt5352\_AOS\_rc|1  
TTAATGGTACTGTAACATTACTGTAAGAGGATGCAGCAGTAGAAGGCATGGTCAAGGAAT  
>HPV45\_Alpha\_397022\_nt5342\_AOS\_rc|1  
TGTAACATTACTGTAAGAGGATGCAGCAGTAGAAGGCATGGTCAAGGAATACTTTGGATA  
>HPV45\_Alpha\_397022\_nt5335\_AOS\_rc|1  
TTACTGTAAGAGGATGCAGCAGTAGAAGGCATGGTCAAGGAATACTTTGGATATGTAAAT  
>HPV45\_Alpha\_397022\_nt5328\_AOS\_rc|1  
AAGAGGATGCAGCAGTAGAAGGCATGGTCAAGGAATACTTTGGATATGTAAATGATTTGT  
>HPV45\_Alpha\_397022\_nt1443\_AOS\_rc|1  
TTTTTGTTACTTGCTTGTAATAGCTCCTTTAGTTCTGTAATACTGCAATGCGGATCTACA  
>HPV45\_Alpha\_397022\_nt1436\_AOS\_rc|1  
TACTTGCTTGTAATAGCTCCTTTAGTTCTGTAATACTGCAATGCGGATCTACATTTTCTG  
>HPV45\_Alpha\_397022\_nt1429\_AOS\_rc|1  
TTGTAATAGCTCCTTTAGTTCTGTAATACTGCAATGCGGATCTACATTTTCTGCATTGTC  
>HPV52\_Alpha\_397038\_nt7837\_AOS\_rc|1  
CGTGTAGTGCACACCTGGTGAGTAACAGTATTTAATCATGTTTTACAAGACATATTTGGC  
>HPV52\_Alpha\_397038\_nt7597\_AOS\_rc|1  
TGCAGGAAACCAAAGGATTAAGCAGTTTGCTGAAACTTATATAAAAAATAGTTGTTACTGT  
>HPV52\_Alpha\_397038\_nt7582\_AOS\_rc|1  
GATTAAGCAGTTTGCTGAAACTTATATAAAAAATAGTTGTTACTGTGCCAAGGACAACCAA  
>HPV52\_Alpha\_397038\_nt5495\_AOS\_rc|1  
TAGATGTAGATGGAGCTGTAGGGGCTATAGGAACAAAAGGAGTATGTGTGGGTAACGAAG  
>HPV52\_Alpha\_397038\_nt5482\_AOS\_rc|1  
AGCTGTAGGGGCTATAGGAACAAAAGGAGTATGTGTGGGTAACGAAGGTAATGGAATGTC  
>HPV52\_Alpha\_397038\_nt5472\_AOS\_rc|1  
GCTATAGGAACAAAAGGAGTATGTGTGGGTAACGAAGGTAATGGAATGTCAGGACCTGAC  
>HPV52\_Alpha\_397038\_nt5465\_AOS\_rc|1  
GAACAAAAGGAGTATGTGTGGGTAACGAAGGTAATGGAATGTCAGGACCTGACTCAATGG  
>HPV52\_Alpha\_397038\_nt5348\_AOS\_rc|1  
TATTATGGGTAGAAAGTGTGGAAGGTAAGTGAAACGTGGGTTGCTGCAAAGAATCTGCAT  
>HPV52\_Alpha\_397038\_nt4982\_AOS\_rc|1  
CAACGCCCTCAAAAACAGGATTGTTATATGTTACTAATTTCTGTGGTGATGACATAAAAG  
>HPV52\_Alpha\_397038\_nt329\_AOS\_rc|1  
TAATGGTTTTTTTACCCTCTCTTCTAATGTTTTTCCCATACAGTGAATATTGATAATGCCT  
>HPV56\_Alpha\_397053\_nt7708\_AOS\_rc|1  
AAAACAGATACTGACAGATACTGGCCTACATAGTGTATTCTGCAAGCCAAAACACCAA  
>HPV56\_Alpha\_397053\_nt7585\_AOS\_rc|1  
TTGGCAGTCATAGTACCTGTGAGTAATACAGGGTGCGGTACTGTACATAATTCAAGTATA  
>HPV56\_Alpha\_397053\_nt7578\_AOS\_rc|1  
TCATAGTACCTGTGAGTAATACAGGGTGCGGTACTGTACATAATTCAAGTATAAAACACA

>HPV56\_Alpha\_397053\_nt1052\_AOS\_rc|1  
TTGTACTTGCAACAATTGTTGACTGTTTCTGCGTCTGCCTGTATATTTTGTATATATGAA  
>HPV56\_Alpha\_397053\_nt1045\_AOS\_rc|1  
TGCAACAATTGTTGACTGTTTCTGCGTCTGCCTGTATATTTTGTATATATGAATCGTCTA  
>HPV56\_Alpha\_397053\_nt253\_AOS\_rc|1  
AATAAACATACTCTGCACACTGCATAAGGAAAATCATCCCTATACACTAATTTTAATTCA  
>HPV56\_Alpha\_397053\_nt66\_AOS\_rc|1  
GTGGATTGTTGAATTGTGGCTCCATGGATATGTCCACACAGAATAAGCTGCCTTTTATAT  
>HPVcand62\_Alpha\_39932599\_nt7255\_AOS\_rc|1  
GCACACACACACATACCATACATACAGTTACTTCCTGCGCTTTTCGTTTAGCAGAGGTAGG  
>HPVcand62\_Alpha\_39932599\_nt5645\_AOS\_rc|1  
GAACCTACAATATATATAGAATATGGGGTAGTTGCAGGGAAGGAAGGCGTTAGCACAGAC  
>HPVcand62\_Alpha\_39932599\_nt5558\_AOS\_rc|1  
ACATCAGGGCCAGTGGACGCTGGAACGGACAACCCAGTGGATAATGGTACAGTGACATTA  
>HPVcand62\_Alpha\_39932599\_nt5551\_AOS\_rc|1  
GGCCAGTGGACGCTGGAACGGACAACCCAGTGGATAATGGTACAGTGACATTAGTATGAG  
>HPVcand62\_Alpha\_39932599\_nt5544\_AOS\_rc|1  
GGACGCTGGAACGGACAACCCAGTGGATAATGGTACAGTGACATTAGTATGAGAGGATGC  
>HPVcand62\_Alpha\_39932599\_nt5520\_AOS\_rc|2  
GGATAATGGTACAGTGACATTAGTATGAGAGGATGCCACAGACGTGGCAGATATGGTGGC  
>HPVcand62\_Alpha\_39932599\_nt4186\_AOS\_rc|1  
CAGTATTAATGCCACTATGAGGCACAATAAAAACAGTAGACCCTGTTCATCAGACCCCCAA  
>HPVcand62\_Alpha\_39932599\_nt3433\_AOS\_rc|1  
CACACGTGTCGTCCTTTTGTGCTGTGTCAGGGTAACTGTTGGTCCCGTACTCGTTATTGTCC  
>HPVcand62\_Alpha\_39932599\_nt1259\_AOS\_rc|1  
TACTGGTTTTTTAACAGCTCTACAATACTTGCTGTGCGTTCCTGCGATTGTTGCACATCTA  
>HPVcand62\_Alpha\_39932599\_nt1246\_AOS\_rc|1  
CAGCTCTACAATACTTGCTGTGCGTTCCTGCGATTGTTGCACATCTACACTGCGTTCGGG  
>HPV43\_Alpha\_40804474\_nt7556\_AOS\_rc|1  
AAATGGAAGACGTTTCAGACGCCATTTTACATACCCACAACAGTAACCATTACTAAAACCA  
>HPV43\_Alpha\_40804474\_nt6554\_AOS\_rc|1  
ATCTGCAATTTTGGACCTGGTATTAGAGCCAGCAATATACATATCGGAAGGCACAACGTC  
>HPV43\_Alpha\_40804474\_nt6547\_AOS\_rc|2  
ATTTTGGACCTGGTATTAGAGCCAGCAATATACATATCGGAAGGCACAACGTCGCCAGTT  
>HPV43\_Alpha\_40804474\_nt6537\_AOS\_rc|1  
TGGTATTAGAGCCAGCAATATACATATCGGAAGGCACAACGTCGCCAGTTTTACCAGCTT  
>HPV43\_Alpha\_40804474\_nt4313\_AOS\_rc|1  
CAAGTGATTATATAAAGGATTGTTTATTTGCTGGAGGACTGATGCAACTTAAGTGTTCTG  
>HPV43\_Alpha\_40804474\_nt4287\_AOS\_rc|1  
TTTGCTGGAGGACTGATGCAACTTAAGTGTTCTGTAATGAAACGCTAACACCAATATTAA  
>HPV43\_Alpha\_40804474\_nt4089\_AOS\_rc|1  
AACAACGCCAATATAAAAACGTTAATAGGTGATGTAAGGACGCCCCAAGACAAAAAATAA  
>HPV43\_Alpha\_40804474\_nt4071\_AOS\_rc|1  
ACGTTAATAGGTGATGTAAGGACGCCCCAAGACAAAAAATAAAGATAGAAGCACATGCA  
>HPV43\_Alpha\_40804474\_nt3877\_AOS\_rc|1  
TGTGGTTGGGGTACAATACCCCCCTTTTATCACAGTTACAGTTCCTCTATACAAATATA  
>HPV81\_Alpha\_40804509\_nt7474\_AOS\_rc|1  
CACACATTCCACAAATATACAAACAACAGTGTAGGGGCAAAAGGGCAGCACGCATACAAT  
>HPV81\_Alpha\_40804509\_nt7328\_AOS\_rc|1  
ACAAACAAGCATACTACTATTTTTTACGTTTTCGCTTAGCAGAGGTAGTGGGGGTCCTGG  
>HPV81\_Alpha\_40804509\_nt6381\_AOS\_rc|1  
ATGGTTGTATTTTTAAACTCCAAGGGGGGCATTTCGTTTTGTGCTGGAGCAACATTAGCA  
>HPV81\_Alpha\_40804509\_nt5765\_AOS\_rc|1  
TTAGGGAAGAATATATAAGAAGGAAACAAGTAAAAATCAGTGCCAACAACATATATGGCG  
>HPV81\_Alpha\_40804509\_nt5752\_AOS\_rc|1

TATAAGAAGGAAACAAGTAAAAATCAGTGCCAACAACATATATGGCGTACGGGGTAGTTG  
>HPV81\_Alpha\_40804509\_nt5744\_AOS\_rc|1  
GGAAACAAGTAAAAATCAGTGCCAACAACATATATGGCGTACGGGGTAGTTGCAGGAAAC  
>HPV81\_Alpha\_40804509\_nt5737\_AOS\_rc|1  
AGTAAAAATCAGTGCCAACAACATATATGGCGTACGGGGTAGTTGCAGGAAACGAAGGGA  
>HPV81\_Alpha\_40804509\_nt924\_AOS\_rc|1  
ATCTGCACTATCTTCTCTTCATCACTTGATTCTCTGATACCCTGTGGTTTTTTCTACAAC  
>HPV81\_Alpha\_40804509\_nt917\_AOS\_rc|1  
CTATCTTCTCTTCATCACTTGATTCTCTGATACCCTGTGGTTTTTTCTACAACAGCCTCC  
>HPV95\_Gamma\_40804520\_nt7122\_AOS\_rc|1  
AATATTTTTTCCAAAAAATAAGGAGCGTCTCTTTTCTTCGCCAGCGTCTTACTTAATG  
>HPV95\_Gamma\_40804520\_nt7027\_AOS\_rc|1  
TATTGACCACATGAGTCACAAAGCATGGACACAATAGTAATTGGAGGTATAGTTTATTGC  
>HPV95\_Gamma\_40804520\_nt6822\_AOS\_rc|2  
TTTTGTGCCTGTTGCAGTTTGAGAAGTAATAGCTCTTTGTCTTTTACGAGATCCATTTAT  
>HPV95\_Gamma\_40804520\_nt6815\_AOS\_rc|1  
CCTGTTGCAGTTTGAGAAGTAATAGCTCTTTGTCTTTTACGAGATCCATTTATTAATCCA  
>HPV95\_Gamma\_40804520\_nt6803\_AOS\_rc|2  
TGAGAAGTAATAGCTCTTTGTCTTTTACGAGATCCATTTATTAATCCACTCTGATAGAGA  
>HPV95\_Gamma\_40804520\_nt6205\_AOS\_rc|1  
AAATGTGAGGGCCAAGATTATTTTGTCTTGTACTCTGAGCAGCAATTATGTAATCAG  
>HPV95\_Gamma\_40804520\_nt422\_AOS\_rc|1  
TAAATAGCACACCTCACCCTGTATAACAGGTCAAGTTTTTCTACTATGTCTAATAGTTT  
>HPV95\_Gamma\_40804520\_nt415\_AOS\_rc|1  
CACACCTCACCCTGTATAACAGGTCAAGTTTTTCTACTATGTCTAATAGTTTAAGACAG  
>HPV95\_Gamma\_40804520\_nt408\_AOS\_rc|1  
CACCCTGTATAACAGGTCAAGTTTTTCTACTATGTCTAATAGTTTAAGACAGCATAAAC  
>HPV94\_Alpha\_40804528\_nt5600\_AOS\_rc|2  
AGGTGTTAAAGGCACATAAGGCCACTGCGCCGAGGTGGGTAATATAATGTCAGGCCCGGT  
>HPV94\_Alpha\_40804528\_nt7013\_AOS\_rc|1  
GGTGCCTCCTTCTGACAAGTTATTGCGGAGGACACAAGAACCTATAAGTGTCTCCAAG  
>HPV94\_Alpha\_40804528\_nt6577\_AOS\_rc|2  
CACTACCAACGTTTTTGGTCACCACCGCCGACTTCAATATTAGAGTGTGTCAGGAATGGTGT  
>HPV94\_Alpha\_40804528\_nt6570\_AOS\_rc|2  
AACGTTTTTGGTCACCACCGCCGACTTCAATATTAGAGTGTGTCAGGAATGGTGTCTCCAC  
>HPV94\_Alpha\_40804528\_nt6555\_AOS\_rc|1  
ACCGCCGACTTCAATATTAGAGTGTGTCAGGAATGGTGTCTCCCACTGCACTGGCTCTATT  
>HPV94\_Alpha\_40804528\_nt5484\_AOS\_rc|1  
TTGAAAGTGTAAGGACAAAGGGGAAGCAGTACTATAGCTCCGTGCCGGTGTGACACTTC  
>HPV94\_Alpha\_40804528\_nt5469\_AOS\_rc|1  
ACAAAGGGGAAGCAGTACTATAGCTCCGTGCCGGTGTGACACTTCGAGTGCCATTTGTAA  
>HPV94\_Alpha\_40804528\_nt5461\_AOS\_rc|1  
GAAGCAGTACTATAGCTCCGTGCCGGTGTGACACTTCGAGTGCCATTTGTAAAGGCAACA  
>HPV94\_Alpha\_40804528\_nt5454\_AOS\_rc|1  
TACTATAGCTCCGTGCCGGTGTGACACTTCGAGTGCCATTTGTAAAGGCAACATCACCAT  
>HPV94\_Alpha\_40804528\_nt4247\_AOS\_rc|1  
ACACAGCAAAACATTAGATTATGCACAGGCGTCTACATCCATATCACAATACACCCAGGT  
>HPVcand85\_Alpha\_4574720\_nt7507\_AOS\_rc|1  
GTGCGCCACTGGCTCACTGGCGCCTTAAACAGAGGCCAAAAAGGATTTAACTTTAAATAAT  
>HPVcand85\_Alpha\_4574720\_nt7500\_AOS\_rc|1  
ACTGGCTCACTGGCGCCTTAAACAGAGGCCAAAAAGGATTTAACTTTAAATAATGTAACAA  
>HPVcand85\_Alpha\_4574720\_nt3992\_AOS\_rc|1  
AAAAACACAAGTAGCCAAGCATGCGCACACACATTAGTAGCAGGAAAAAGCGGAATAGTG  
>HPVcand85\_Alpha\_4574720\_nt3551\_AOS\_rc|1  
GGACAGTCCGTGCACTTCACTTGTCTGTGAATCCACAATGTCTGAATGGGTTTCTAGT



>HPVcand85\_Alpha\_4574720\_nt3538\_AOS\_rc|1  
ACTTCACTTGTTCCTGTGAATCCACAATGTCTGAATGGGTTTCTAGTCGGCGCCGAACCC  
>HPVcand85\_Alpha\_4574720\_nt3312\_AOS\_rc|1  
CATTATACCACACTTCCCATTTACCGCTCTGTCCATATTGTTGTGCATCACATTTAAACT  
>HPVcand85\_Alpha\_4574720\_nt1395\_AOS\_rc|1  
TCTATATCCATTTTCATTATCTGTACTACATGCCTCACTATTTAAACCGTCGCCATTTTTTC  
>HPVcand85\_Alpha\_4574720\_nt1383\_AOS\_rc|1  
TCATTATCTGTACTACATGCCTCACTATTTAAACCGTCGCCATTTTTTCCCATCCCCAAAC  
>HPVcand85\_Alpha\_4574720\_nt1368\_AOS\_rc|1  
CATGCCTCACTATTTAAACCGTCGCCATTTTTTCCCATCCCCAAACACATTTGTATCTAGG  
>HPVcand85\_Alpha\_4574720\_nt1360\_AOS\_rc|2  
ACTATTTAAACCGTCGCCATTTTTTCCCATCCCCAAACACATTTGTATCTAGGGTTACCTG  
>HPV96\_Beta\_50253426\_nt4204\_AOS\_rc|1  
GGGTTAGTTATTAGTATAAAAAAATGAAATGTTAGTAGTTAAAGACTATCAAAGCTACCA  
>HPV96\_Beta\_50253426\_nt4195\_AOS\_rc|1  
ATTAGTATAAAAAAATGAAATGTTAGTAGTTAAAGACTATCAAAGCTACCAAAGGACCAC  
>HPV96\_Beta\_50253426\_nt3060\_AOS\_rc|2  
TTTCTAAACTGGTGTTAATCAATGTCCAAGGTTTCATCTTTGTAAGGTGAGTCTCTTAATT  
>HPV96\_Beta\_50253426\_nt3048\_AOS\_rc|1  
TGTTAATCAATGTCCAAGGTTTCATCTTTGTAAGGTGAGTCTCTTAATTTCTCTAGTTGAA  
>HPV96\_Beta\_50253426\_nt1650\_AOS\_rc|1  
TGTTCTTGTAACAGTTGCTTACATCCTTCTAATAATTCTCTTTAACTCCATATGCAGTT  
>HPV96\_Beta\_50253426\_nt696\_AOS\_rc|1  
CTACAATATCTGCAAATGCCTTTTCCAACCTCCTCTTACTAAATAAAAAGTTTTCTTGATAC  
>HPV96\_Beta\_50253426\_nt484\_AOS\_rc|1  
TGTTCTAGCACAAATTGAAACAACACGCATATGCATAACCTTCTTCCAAATAAGATTTAA  
>HPV83\_Alpha\_5059324\_nt6565\_AOS\_rc|1  
GGAGCATAGATGTAGCTGGTAAGAGTGTTCCTACTATTAGCAGATGTGCCTGGAATATAA  
>HPV83\_Alpha\_5059324\_nt6558\_AOS\_rc|1  
AGATGTAGCTGGTAAGAGTGTTCCTACTATTAGCAGATGTGCCTGGAATATAATAAGAGG  
>HPV83\_Alpha\_5059324\_nt5608\_AOS\_rc|1  
ACCGTCTATAAACACAGACTGAATAGGAATATTAGATGGCACAGGAACAGAAGGGTCTGC  
>HPV83\_Alpha\_5059324\_nt5599\_AOS\_rc|1  
AAACACAGACTGAATAGGAATATTAGATGGCACAGGAACAGAAGGGTCTGCAGGCATATG  
>HPV83\_Alpha\_5059324\_nt4164\_AOS\_rc|1  
ATAATAATAATTACGATGAGAATTAATAATAAGCAGTAATCCCCTTCGTCCTCCGGCCA  
>HPV83\_Alpha\_5059324\_nt4152\_AOS\_rc|1  
ACGATGAGAATTAATAATAAGCAGTAATCCCCTTCGTCCTCCGGCCAATAACAATTTAA  
>HPV83\_Alpha\_5059324\_nt4139\_AOS\_rc|1  
AAATAATAAGCAGTAATCCCCTTCGTCCTCCGGCCAATAACAATTTAAATCATATGCCTGCC  
>HPV83\_Alpha\_5059324\_nt4106\_AOS\_rc|1  
CAATAACAATTAAATCATATGCCTGCCCCCACCTCTAGCCTCCAATGGATACATAGTGA  
>HPV83\_Alpha\_5059324\_nt3859\_AOS\_rc|1  
CACAGAATATGACACCACAAACAAATCAAGCACAAATATGTAATCCAGGGTTGTACTGGT  
>HPV83\_Alpha\_5059324\_nt3822\_AOS\_rc|1  
ATGTAATCCAGGGTTGTACTGGTATATGGTGTGGTGTATAGTGGCTCAGGTATTTGCAAA  
>HPV59\_Alpha\_557236\_nt6416\_AOS\_rc|1  
ATAAATAACTGCCTGGGTTGGCACGTATGTCAGTACCTTTAATATATAGTGATTCAGGAA  
>HPV59\_Alpha\_557236\_nt5491\_AOS\_rc|1  
GCCATAAAAAATAATTTGTGCCTTCTATATTAATAGACTGTATGGTGGTAAAGGGTGTAG  
>HPV59\_Alpha\_557236\_nt5476\_AOS\_rc|1  
TTGTGCCTTCTATATTAATAGACTGTATGGTGGTAAAGGGTGTAGTAGAATAAGTGGGTT  
>HPV59\_Alpha\_557236\_nt5456\_AOS\_rc|1  
GACTGTATGGTGGTAAAGGGTGTAGTAGAATAAGTGGGTTCAACAATATTAGTATTAGGT  
>HPV59\_Alpha\_557236\_nt5328\_AOS\_rc|1

AAAGGTGCTAGATGCCGACCGTGTTAATGACAACTTTGAAAAGAAGATTTAGGAATTGT  
>HPV59\_Alpha\_557236\_nt5321\_AOS\_rc|1  
CTAGATGCCGACCGTGTTAATGACAACTTTGAAAAGAAGATTTAGGAATTGTAAATGCA  
>HPV59\_Alpha\_557236\_nt5313\_AOS\_rc|1  
CGACCGTGTTAATGACAACTTTGAAAAGAAGATTTAGGAATTGTAAATGCAGTGTGGC  
>HPV59\_Alpha\_557236\_nt5300\_AOS\_rc|2  
GACAACTTTGAAAAGAAGATTTAGGAATTGTAAATGCAGTGTGGCAGTACTAGTAGGT  
>HPV59\_Alpha\_557236\_nt5293\_AOS\_rc|1  
TTTGAAAAGAAGATTTAGGAATTGTAAATGCAGTGTGGCAGTACTAGTAGGTGCTTCAT  
>HPV59\_Alpha\_557236\_nt1414\_AOS\_rc|1  
CATAGCTGCTTTCCTTATTTTTGCTATGTAATAACTGTAACAATTGATTAGTGGGGGATGT  
>HPV6\_Alpha\_6002612\_nt7533\_AOS\_rc|1  
GTGCATGTATATTACTTATGTGTGTAAGGCGCGTGCAAACCAAACGCGTGCAACAGCCA  
>HPV6\_Alpha\_6002612\_nt7504\_AOS\_rc|1  
CGCGTGCAAACCAAACGCGTGCAACAGCCACTGAGTCACAGGGTGTAACAAGATATACA  
>HPV6\_Alpha\_6002612\_nt7491\_AOS\_rc|1  
AAACGCGTGCAACAGCCACTGAGTCACAGGGTGTAACAAGATATACAATAATGTAGTTAA  
>HPV6\_Alpha\_6002612\_nt6604\_AOS\_rc|2  
CTTGGGGTGTTAACATATATACTACCTCCCTACAGACGTTTCGATTTCCACTACCCTTAATT  
>HPV6\_Alpha\_6002612\_nt5334\_AOS\_rc|1  
GAAATATCATAAAAATAATGAATGCGGGCCCCCTATGTGCTTTCCGCTGCGAGTGTGCATA  
>HPV6\_Alpha\_6002612\_nt4639\_AOS\_rc|1  
CACAGGAGGACGAGCCATAGGCCCACTAGTAATAGAAGGTTTTGCAGAAGTTCCTAAGGG  
>HPV6\_Alpha\_6002612\_nt4211\_AOS\_rc|1  
GTACAGCTCTATAGTGCATTAATAATAACCCCAACACCCCTACAATAAAGGCACATAACA  
>HPV6\_Alpha\_6002612\_nt3489\_AOS\_rc|1  
TTTGGTGCTGGTCGTGATTGTTAGTGATGACGTTGTGGTTTTCCACTGTCCACGGGTCCAA  
>HPV6\_Alpha\_6002612\_nt3128\_AOS\_rc|1  
CTTAGCATCTACCATACTATGCACCTTTACCCAGGAGTCAGTGTCTGCACATACACATC  
>HPV57\_Alpha\_60882\_nt6960\_AOS\_rc|2  
GACATGTTATCGCTTGGGATTGCAAATACCTGTAGGTGTCCTGCAGGCTGGCGGACGGGG  
>HPV57\_Alpha\_60882\_nt7430\_AOS\_rc|1  
TATCTACCAGGGGGCTACATACAGGCCACAGTGTGCAAACCATGCAGCGGGGACAATTAC  
>HPV57\_Alpha\_60882\_nt7220\_AOS\_rc|2  
CATATACAAAAGTAGAGCAAAGGAAATGAGGCAGACACAGAATCACTATCGCCTGACCTT  
>HPV57\_Alpha\_60882\_nt4317\_AOS\_rc|1  
GACATGGCAATAAGTTTATTGACACGTAGCAATACAAAGGCAATCAGGTGCACACCGATA  
>HPV57\_Alpha\_60882\_nt4310\_AOS\_rc|1  
CAATAAGTTTATTGACACGTAGCAATACAAAGGCAATCAGGTGCACACCGATAAAAATGT  
>HPV57\_Alpha\_60882\_nt4230\_AOS\_rc|1  
AAAACACAATGAGTATGTACACTACTGCAGCAGACGGACGTACAGCATCAACAACAAAAT  
>HPV57\_Alpha\_60882\_nt4120\_AOS\_rc|2  
ACAGGACAATGGGATACGACCCGCCCGTGCCCTTGTACACAGCAGGATACATTGCAGTAT  
>HPV57\_Alpha\_60882\_nt4061\_AOS\_rc|1  
TACAGGGGGGAGGTATATACAGGGTAGCAGCAGTTGGTCACAATGTAATATCAACTATTG  
>HPV57\_Alpha\_60882\_nt4048\_AOS\_rc|1  
TATATACAGGGTAGCAGCAGTTGGTCACAATGTAATATCAACTATTGTAGAAACCACAAG  
>HPV69\_Alpha\_6970418\_nt7417\_AOS\_rc|1  
TCAAAAAAAGTGCGTATGCAACTATTGTTAAAAGATATGTGAGTAATGTAGGTGAGCCA  
>HPV69\_Alpha\_6970418\_nt7409\_AOS\_rc|1  
AAGTGCATGCAACTATTGTTAAAAGATATGTGAGTAATGTAGGTGAGCCACGTCTAGG  
>HPV69\_Alpha\_6970418\_nt7402\_AOS\_rc|1  
TATGCAACTATTGTTAAAAGATATGTGAGTAATGTAGGTGAGCCACGTCTAGGCAAGCCA  
>HPV69\_Alpha\_6970418\_nt6352\_AOS\_rc|1  
ATAGAAGTAGTTGGAGGTTACAGACCTTGACCAGCGCCTTTAATATACATAGATACTGGT

>HPV69\_Alpha\_6970418\_nt6345\_AOS\_rc|2  
TAGTTGGAGGTTACAGACCTTGACCAGCGCCTTTAATATACATAGATACTGGTACAGAAT  
>HPV69\_Alpha\_6970418\_nt6337\_AOS\_rc|1  
GGTTCACGACCTTGACCAGCGCCTTTAATATACATAGATACTGGTACAGAATCACCTATA  
>HPV69\_Alpha\_6970418\_nt5350\_AOS\_rc|1  
CCATGTGGAAGAAGGTACAGGAGCATAAATGTCAGGGCCGTTATATATAGGTATATCAAA  
>HPV69\_Alpha\_6970418\_nt5309\_AOS\_rc|1  
TATATATAGGTATATCAAATGATGTAGATAGAGGTATGGTAACATTTAAGGGTGCACTAC  
>HPV69\_Alpha\_6970418\_nt5302\_AOS\_rc|1  
AGGTATATCAAATGATGTAGATAGAGGTATGGTAACATTTAAGGGTGCACTACTAGTGGT  
>HPV69\_Alpha\_6970418\_nt5295\_AOS\_rc|1  
TCAAATGATGTAGATAGAGGTATGGTAACATTTAAGGGTGCACTACTAGTGGTTGAAAAT  
>HPV82\_Alpha\_6970427\_nt7511\_AOS\_rc|1  
GGCGGGCGGGATGTACATACCATGCCAAAAGAATTAAGGGTTATGCCAAAAACATAGGT  
>HPV82\_Alpha\_6970427\_nt4842\_AOS\_rc|1  
ACTAATAAAGTCTGGATTAGTAACCTTAACCTGTGAAAATGCCCTGCTATATAAACGAGG  
>HPV82\_Alpha\_6970427\_nt4835\_AOS\_rc|1  
AAGTCTGGATTAGTAACCTTAACCTGTGAAAATGCCCTGCTATATAAACGAGGTGCAGCA  
>HPV82\_Alpha\_6970427\_nt2884\_AOS\_rc|1  
GTTTTGATACTGCCGATGCTGGTACTTGTATGGTTAAGGGTTTGCATGTTTCTTTCTC  
>HPV82\_Alpha\_6970427\_nt2877\_AOS\_rc|1  
TACTGCCGATGCTGGTACTACTTGATGGTTAAGGGTTTGCATGTTTCTTTCTCGTGCAGT  
>HPV82\_Alpha\_6970427\_nt2869\_AOS\_rc|1  
ATGCTGGTACTACTTGATGGTTAAGGGTTTGCATGTTTCTTTCTCGTGCAGTATAAAACA  
>HPV82\_Alpha\_6970427\_nt1366\_AOS\_rc|1  
CCTACATTGGTAGCATTTTTCGTTTGTTCAGGTCTATCTCTGTACTTCTGTCGCTGCTC  
>HPV82\_Alpha\_6970427\_nt503\_AOS\_rc|1  
GCGTTATTACACCTGGGTTTCACTACGTTGTCTTGGTGGTTTTCTGCAATTTGCACACTG  
>HPV82\_Alpha\_6970427\_nt493\_AOS\_rc|1  
ACCTGGGTTTCACTACGTTGTCTTGGTGGTTTTCTGCAATTTGCACACTGTCCCGTCCAG  
>HPV68a\_Alpha\_71726685\_nt6285\_AOS\_rc|1  
AGGAGTTTCACGAATGTCAGTGCCCTTAATATACATGTCAGTGGAATAGTGTCCCCTAC  
>HPV68a\_Alpha\_71726685\_nt6278\_AOS\_rc|1  
TCACGAATGTCAGTGCCCTTAATATACATGTCAGTGGAATAGTGTCCCCTACCATGCCT  
>HPV68a\_Alpha\_71726685\_nt5355\_AOS\_rc|1  
AACCATATATAGTTATGGCAAAGGTTGTATCAATTGGAGTAGAGGGTGTTAAAGGCAACT  
>HPV68a\_Alpha\_71726685\_nt5347\_AOS\_rc|1  
ATAGTTATGGCAAAGGTTGTATCAATTGGAGTAGAGGGTGTTAAAGGCAACTGTGGGGTT  
>HPV68a\_Alpha\_71726685\_nt5329\_AOS\_rc|1  
GTATCAATTGGAGTAGAGGGTGTTAAAGGCAACTGTGGGGTTGTAGATGGTAATACAACA  
>HPV68a\_Alpha\_71726685\_nt5209\_AOS\_rc|1  
TATGTAGTGGATGCAGCAGAAGCCAATGAAGGAAGTATGTGGGAACGAGTAGTAAAT  
>HPV68a\_Alpha\_71726685\_nt5202\_AOS\_rc|1  
TGGATGCAGCAGAAGCCAATGAAGGAAGTATGTGGGAACGAGTAGTAAATGTAGCAT  
>HPV68a\_Alpha\_71726685\_nt5193\_AOS\_rc|1  
CAGAAGCCAATGAAGGAAGTATGTGGGAACGAGTAGTAAATGTAGCATTATGAAATG  
>HPV68a\_Alpha\_71726685\_nt3453\_AOS\_rc|1  
TTGTTTTGGCCTGCACTTCTACTGAGGAGTGGGAGGTCGACACCGTCCACGGACACGTTG  
>HPV68a\_Alpha\_71726685\_nt1336\_AOS\_rc|1  
TGTTACATTGTAATAATACTTTAAGTTGGGTAGTAGGTGATTTAGGATCCTGGTTTTTAC  
>HPV97\_Alpha\_71726694\_nt7616\_AOS\_rc|1  
TCATTTTATACTTTATAAGAAGAGTAGACAGATTGTTGGATGTAAAAGTAGTTGCACAGG  
>HPV97\_Alpha\_71726694\_nt7417\_AOS\_rc|1  
CAAAGTGTGCGCCAAAATACGTGCCAGTGGTGAAAATATGTATGACTATTGTATGTGAGA  
>HPV97\_Alpha\_71726694\_nt7410\_AOS\_rc|1

TGCGCCAAAATACGTGCCAGTGGTGAAAATATGTATGACTATTGTATGTGAGATTAACAT  
>HPV97\_Alpha\_71726694\_nt6277\_AOS\_rc|1  
TACCAGTTCCTTTAATATATAACTCCTGTGGAATAGTGTACCCATTGTTCCAGCTCTGT  
>HPV97\_Alpha\_71726694\_nt5350\_AOS\_rc|1  
CCTATATAGTGTGTCGTGGACGTAGATGTAGGTGTTATAAAAGGCCATACAGAAGTACTA  
>HPV97\_Alpha\_71726694\_nt5341\_AOS\_rc|1  
TGTGTCTGTGGACGTAGATGTAGGTGTTATAAAAGGCCATACAGAAGTACTAGAAGGTAAT  
>HPV97\_Alpha\_71726694\_nt5334\_AOS\_rc|1  
TGGACGTAGATGTAGGTGTTATAAAAGGCCATACAGAAGTACTAGAAGGTAATACAATAT  
>HPV97\_Alpha\_71726694\_nt4890\_AOS\_rc|1  
AATCGGGAACATTACTAGTAGGTTCAAAATGTTAATGTAGAGTCAATAGGATTAAAGGCAG  
>HPV97\_Alpha\_71726694\_nt3688\_AOS\_rc|1  
TAGGAACACTATCCAAAATTTGGTTCGTTGATGCTCACTATCATACATTACAGTTAATA  
>HPV97\_Alpha\_71726694\_nt3224\_AOS\_rc|1  
ACAACGCCCCCAAATGCACTTCCCCTTATTACTGTTACCATATTTTTTACTTTTCATGT  
>HPV106\_Alpha\_71726710\_nt7526\_AOS\_rc|1  
TGTTATAAGGGCGGGGTATGCATGACCGGGCCACAAGGACTGGACTACACAACATAAAT  
>HPV106\_Alpha\_71726710\_nt7516\_AOS\_rc|1  
GCGGGGGTATGCATGACCGGGCCACAAGGACTGGACTACACAACATAAATGTATAGTTAC  
>HPV106\_Alpha\_71726710\_nt7509\_AOS\_rc|1  
TATGCATGACCGGGCCACAAGGACTGGACTACACAACATAAATGTATAGTTACTCACAAG  
>HPV106\_Alpha\_71726710\_nt6592\_AOS\_rc|2  
TTGTAGCAGAGGGCGGGATGTAGTAGTAGGCCCTTTAGTAAAAACCCCTCCGGAACAT  
>HPV106\_Alpha\_71726710\_nt5560\_AOS\_rc|2  
GGGCCACTAAAAACAGGGACATCAAAGCTTGTAGACAGGGGAACAGTAGTGTGCGATACT  
>HPV106\_Alpha\_71726710\_nt5552\_AOS\_rc|1  
AAAAACAGGGACATCAAAGCTTGTAGACAGGGGAACAGTAGTGTGCGATACTGTGGAGAC  
>HPV106\_Alpha\_71726710\_nt5545\_AOS\_rc|1  
GGGACATCAAAGCTTGTAGACAGGGGAACAGTAGTGTGCGATACTGTGGAGACAGTGGAT  
>HPV106\_Alpha\_71726710\_nt5533\_AOS\_rc|1  
CTTGTAGACAGGGGAACAGTAGTGTGCGATACTGTGGAGACAGTGGATGATGCAGCCAAT  
>HPV106\_Alpha\_71726710\_nt5367\_AOS\_rc|1  
TAGGGGTGTCAGACACCAGAGGTTGCATTTCTAACTCTTCAGCAGGAGTAATTGGACTTA  
>HPV106\_Alpha\_71726710\_nt3874\_AOS\_rc|1  
GCAGCAGGTGTGTCCAAACAGATAGCCAGCAAATAAAAATCTCCAGGGTGTAGTATACAC  
>HPV102\_Alpha\_71726718\_nt5688\_AOS\_rc|2  
GAAAGAATAAGTAATTAGGCAATAAAAAATAGTCTGTACCATCCACAAACACAGATTGGG  
>HPV102\_Alpha\_71726718\_nt5655\_AOS\_rc|1  
CTGTACCATCCACAAACACAGATTGGGAAGGAACATTAGAGGACTGGGAAACATGCAGCA  
>HPV102\_Alpha\_71726718\_nt5456\_AOS\_rc|1  
AACAGACGTGGAAGAAGTATATGAAACATGTGGAGACGCCAAGGAGTCCAAGTGGCCATT  
>HPV102\_Alpha\_71726718\_nt4263\_AOS\_rc|1  
TCAAAAATGTATGGGAATACAAAAGGAACACAGTAAGGAGTCTACATGTGCATAAGCCTC  
>HPV102\_Alpha\_71726718\_nt4168\_AOS\_rc|1  
TAAAATTATTAACAGTAATCCAGTATCAGCTTGCCCAAAAACAATCACATCATAGGACGG  
>HPV102\_Alpha\_71726718\_nt4161\_AOS\_rc|1  
ATTAACAGTAATCCAGTATCAGCTTGCCCAAAAACAATCACATCATAGGACGGCCCCCCC  
>HPV102\_Alpha\_71726718\_nt4146\_AOS\_rc|1  
GTATCAGCTTGCCCAAAAACAATCACATCATAGGACGGCCCCCCCCGTCGTGTTTCCAAT  
>HPV102\_Alpha\_71726718\_nt4139\_AOS\_rc|1  
CTTGCCCAAAAACAATCACATCATAGGACGGCCCCCCCCGTCGTGTTTCCAATGGATACA  
>HPV102\_Alpha\_71726718\_nt3615\_AOS\_rc|1  
TGTTCTACACTGCTATACCGCAAGGTAACAAAGGTTGCTTTAGTGGCTGTCTCCCCGCAC  
>HPV102\_Alpha\_71726718\_nt3406\_AOS\_rc|1  
GCACTCAGTGTACCGTAGAATCCGTGGGTACTAGTGTCCAGCCGCTTTTGATGTTGTTT

>HPV13\_Alpha\_85827580\_nt7631\_AOS\_rc|1  
AAAATGAGTGATAGAAAGATTAGTAAGATTTAGTAAACATATATAACCGCGCCCTAGCAA  
>HPV13\_Alpha\_85827580\_nt7556\_AOS\_rc|1  
TGATTTTGGCAAGCGGTGGATAATTTTGGCAGGCGGTAGGTAAGATTATATAAACAGCGT  
>HPV13\_Alpha\_85827580\_nt4886\_AOS\_rc|1  
TGTCTTCTGTAGAATGAGGGGAAATAGTAGATGGCGATATAAACACGTGTGCACCACTTT  
>HPV13\_Alpha\_85827580\_nt4879\_AOS\_rc|1  
TGTAGAATGAGGGGAAATAGTAGATGGCGATATAAACACGTGTGCACCACTTTCAATAGA  
>HPV13\_Alpha\_85827580\_nt4872\_AOS\_rc|1  
TGAGGGGAAATAGTAGATGGCGATATAAACACGTGTGCACCACTTTCAATAGAAGGTTGA  
>HPV13\_Alpha\_85827580\_nt4865\_AOS\_rc|1  
AAATAGTAGATGGCGATATAAACACGTGTGCACCACTTTCAATAGAAGGTTGAGATTGTG  
>HPV13\_Alpha\_85827580\_nt3968\_AOS\_rc|1  
AAAACCTCTGATATCCACAATATTGTTATAATGCTAACTACACACACTGTAAGTGCAATTA  
>HPV2\_Alpha\_9626032\_nt4623\_AOS\_rc|1  
TCAATGATAACAGGCGGCCTGGGCGTTGGACCAATGTCAACTACAGTGGTGGGTCGCGAA  
>HPV2\_Alpha\_9626032\_nt4220\_AOS\_rc|2  
CATCAACAATAAAAAGGCGATTAGGATAAGAATCACCAACAGACATTGAACATCATCATG  
>HPV2\_Alpha\_9626032\_nt4210\_AOS\_rc|1  
AAAAAGGCGATTAGGATAAGAATCACCAACAGACATTGAACATCATCATGACCCACAGT  
>HPV2\_Alpha\_9626032\_nt4178\_AOS\_rc|1  
ACATTGAACATCATCATGACCCACAGTACCACAGGATATGTTCCCTCAGATCCCTTATA  
>HPV2\_Alpha\_9626032\_nt4105\_AOS\_rc|1  
ATTGCAAAATCTCACACAATGGGTATATAGACTATGTATACAAGCTAGCAGCAACGTATGG  
>HPV2\_Alpha\_9626032\_nt4098\_AOS\_rc|1  
ATCTCACACAATGGGTATATAGACTATGTATACAAGCTAGCAGCAACGTATGGCGAAATA  
>HPV2\_Alpha\_9626032\_nt4091\_AOS\_rc|1  
ACAATGGGTATATAGACTATGTATACAAGCTAGCAGCAACGTATGGCGAAATAATAACGA  
>HPV2\_Alpha\_9626032\_nt4084\_AOS\_rc|1  
GTATATAGACTATGTATACAAGCTAGCAGCAACGTATGGCGAAATAATAACGACTATGGT  
>HPV2\_Alpha\_9626032\_nt4077\_AOS\_rc|1  
GACTATGTATACAAGCTAGCAGCAACGTATGGCGAAATAATAACGACTATGGTAAAAACC  
>HPV41\_Nu\_9626041\_nt6645\_AOS\_rc|3  
TGTAGAATAAAGGCAAGCTGAAACTCCTCGGTGTGCCTTAAAAACTCAAAAAACTTAGAA  
>HPV41\_Nu\_9626041\_nt6603\_AOS\_rc|2  
AACTCAAAAAACTTAGAATTGTTATATGAAGAAGCATCCCCCTCAGGAACACTGATGGTA  
>HPV41\_Nu\_9626041\_nt3682\_AOS\_rc|1  
TGAAAGTAGTCCCCAGATACATTATGTCACCGCTATACTTGTTTTTCCATTTGTACCTTA  
>HPV41\_Nu\_9626041\_nt3148\_AOS\_rc|1  
TACCAGTGTCAATCAATGCCACCTCTAGCTTTATACCATTTCATCTGTTGGTGTAATATAAT  
>HPV41\_Nu\_9626041\_nt2640\_AOS\_rc|1  
GCCAAAATTTCCATAAAAAAGAGTTCCATGTATAACCATCAATGTAATATAACGGTTGCC  
>HPV41\_Nu\_9626041\_nt2632\_AOS\_rc|1  
TTCCTAAAAAAGAGTTCCATGTATAACCATCAATGTAATATAACGGTTGCCATTTCCCT  
>HPV41\_Nu\_9626041\_nt2578\_AOS\_rc|1  
TTTCCTTTAAGAGGAAATGGCTTGTTAAAGTACACATACATTGTTCTGGTTTGCAGATAT  
>HPV41\_Nu\_9626041\_nt2569\_AOS\_rc|1  
AGAGGAAATGGCTTGTTAAAGTACACATACATTGTTCTGGTTTGCAGATATTTGAATTCA  
>HPV41\_Nu\_9626041\_nt2561\_AOS\_rc|1  
TGGCTTGTTAAAGTACACATACATTGTTCTGGTTTGCAGATATTTGAATTCATCTAATCG  
>HPV41\_Nu\_9626041\_nt1591\_AOS\_rc|1  
TCAATGTATAAAAAATTGGCATTGTTGTTCGAGCAAAACCTCCATAGCACTTATCTCACTA  
>HPV1\_Mu\_9626063\_nt7292\_AOS\_rc|1  
CAATCAGAGAACACAAAAATGCACACTTGTGTATAATGCACCGGAGTCTAAACAAATAA  
>HPV1\_Mu\_9626063\_nt7272\_AOS\_rc|1

TGCACACTTGTGTATAATGCACCGGAGTCTAAACAAATAAATCCTCAACAATCTGGAATA  
>HPV1\_Mu\_9626063\_nt7265\_AOS\_rc|1  
TTGTGTATAATGCACCGGAGTCTAAACAAATAAATCCTCAACAATCTGGAATATATGCAG  
>HPV1\_Mu\_9626063\_nt6565\_AOS\_rc|2  
AAATATTAGGGTCCATTGTATGAATGTAGGCTAGATTTTCGGGAGTTAACTTTACTTTAC  
>HPV1\_Mu\_9626063\_nt5769\_AOS\_rc|2  
ATAATTTGTTGGATTTTCTGCATCATCTAACTTATTTAAAAGAGGGTGGCCCGTTATTCC  
>HPV1\_Mu\_9626063\_nt5578\_AOS\_rc|2  
CTCTAAATGCATTTGGTGACACTTTTGGTATAGTTACAGTTTGATTACTGGAGATCTCAA  
>HPV1\_Mu\_9626063\_nt5255\_AOS\_rc|1  
AGGATTAATTATTGGAGTCCCTTTAGAAGAATTTGGGTAATATACATGCAAGCTAGTATC  
>HPV1\_Mu\_9626063\_nt5157\_AOS\_rc|1  
AATCTAGTATAGAAACCTCACCTCTGAGTTAGTAATAGTAAGTTGCAAATTTTCGCCCCA  
>HPV1\_Mu\_9626063\_nt5119\_AOS\_rc|1  
GTAAGTTGCAAATTTTCGCCCACACTTTCGTTTGTGTCTAAAAGCTCTTCTTCTGAATAT  
>HPV1\_Mu\_9626063\_nt3748\_AOS\_rc|1  
TTCCATTAATTTTAAGACCCATTAACTGTCCCAAAAACACAGACACTGATCTGGGCAAA  
>HPV18\_Alpha\_9626069\_nt5352\_AOS\_rc|1  
GGGACCGTTACATTACTATAGGAAGAGGCAGAAGATATAGTGGGCGAATATTTAAAAAAT  
>HPV18\_Alpha\_9626069\_nt5359\_AOS\_rc|1  
GGTTAAAGGACCGTTACATTACTATAGGAAGAGGCAGAAGATATAGTGGGCGAATATTT  
>HPV18\_Alpha\_9626069\_nt5345\_AOS\_rc|1  
TTACATTACTATAGGAAGAGGCAGAAGATATAGTGGGCGAATATTTAAAAAATGCAAAGG  
>HPV18\_Alpha\_9626069\_nt5338\_AOS\_rc|1  
ACTATAGGAAGAGGCAGAAGATATAGTGGGCGAATATTTAAAAAATGCAAAGGAGGTAGT  
>HPV18\_Alpha\_9626069\_nt5331\_AOS\_rc|1  
GAAGAGGCAGAAGATATAGTGGGCGAATATTTAAAAAATGCAAAGGAGGTAGTAGAACGC  
>HPV18\_Alpha\_9626069\_nt5324\_AOS\_rc|1  
CAGAAGATATAGTGGGCGAATATTTAAAAAATGCAAAGGAGGTAGTAGAACGCGATGGTA  
>HPV18\_Alpha\_9626069\_nt1507\_AOS\_rc|1  
AAATACTGCTAACATAGCTCCTTGTTTATTGTTTACTTTTAAACAAGTCTTTAATTGTGC  
>HPV18\_Alpha\_9626069\_nt1479\_AOS\_rc|1  
TTGTTTACTTTTAAACAAGTCTTTTAATTGTGCTATGGTACATTGTGGATTACATTTTCT  
>HPV4\_Gamma\_9626597\_nt6989\_AOS\_rc|1  
GTTTATTTCACTATAGTTCACAAAAACAGATACATACACGTTTGCAAATCTTATATAATT  
>HPV4\_Gamma\_9626597\_nt6804\_AOS\_rc|2  
CGTTTGGTATTAGTTTGTGCATGAGAAGAACTTATTATTCTTTTACGTTTGTAGAGAACCA  
>HPV4\_Gamma\_9626597\_nt6192\_AOS\_rc|2  
GTCCCTACATAAATATGAGGTCCTAAAGTGACTGATCTTGTTGGTTTTGAGCACCATA  
>HPV4\_Gamma\_9626597\_nt5220\_AOS\_rc|2  
TATACAAAAATCCGTACTAAATATATCAGATAACAAAGCTGGTTCTAGAGGAACAAATGGC  
>HPV4\_Gamma\_9626597\_nt4544\_AOS\_rc|1  
TAGTAGGTATTTGCTGAACCTTCTATTATATAAATCCCGTGCTCTTCTTATGACGAT  
>HPV4\_Gamma\_9626597\_nt3693\_AOS\_rc|1  
ATTCAATGAGCCGTAGGTATATGTACACAGTTTAGGAAAAAGGTTGTGTTTTACAAAAGC  
>HPV4\_Gamma\_9626597\_nt3685\_AOS\_rc|1  
AGCCGTAGGTATATGTACACAGTTTAGGAAAAAGGTTGTGTTTTACAAAAGCGTCTCTTT  
>HPV4\_Gamma\_9626597\_nt3678\_AOS\_rc|1  
GGTATATGTACACAGTTTAGGAAAAAGGTTGTGTTTTACAAAAGCGTCTCTTTGGTCAGT  
>HPV4\_Gamma\_9626597\_nt3670\_AOS\_rc|1  
TACACAGTTTAGGAAAAAGGTTGTGTTTTACAAAAGCGTCTCTTTGGTCAGTGCTATCAA  
>HPV4\_Gamma\_9626597\_nt3649\_AOS\_rc|1  
TGTGTTTTACAAAAGCGTCTCTTTGGTCAGTGCTATCAAATGCAATAAGCATGCGACTAT  
>HPV63\_Mu\_9626605\_nt6415\_AOS\_rc|2  
TATACTCATTATAATCTGCGCTATCATAAGTCTCAGGGGTTGCTTTGTTAAGAACATTTA

>HPV63\_Mu\_9626605\_nt6407\_AOS\_rc|1  
TTATAATCTGCGCTATCATAAGTCTCAGGGGTTGCTTTGTTAAGAACATTTATATTCATC  
>HPV63\_Mu\_9626605\_nt5232\_AOS\_rc|1  
CTAAATGTATAATAATTAATGGAATGTCAAGATCAGTAGGATTTATAGTAGGTGATCCAA  
>HPV63\_Mu\_9626605\_nt5225\_AOS\_rc|1  
TATAATAATTAATGGAATGTCAAGATCAGTAGGATTTATAGTAGGTGATCCAACACTAGC  
>HPV63\_Mu\_9626605\_nt4424\_AOS\_rc|1  
AAAATTAAGTAGTGGTATTTCTTGTCTACTATTTGACCCGGCGTATCTACATCTATAAA  
>HPV63\_Mu\_9626605\_nt4417\_AOS\_rc|1  
ACTAGTGGTATTTCTTGTCTACTATTTGACCCGGCGTATCTACATCTATAAAAATATTA  
>HPV63\_Mu\_9626605\_nt3091\_AOS\_rc|1  
TGGCCTCTTCTTGAAAGTCAACATAGTAGTTTTTGACACCATCATATTCTAAATAAAACA  
>HPV63\_Mu\_9626605\_nt3064\_AOS\_rc|1  
AGTTTTTTGACACCATCATATTCTAAATAAAACACACCATGAACATCTACATCACTAGCTG  
>HPV63\_Mu\_9626605\_nt3051\_AOS\_rc|1  
ATCATATTCTAAATAAAACACACCATGAACATCTACATCACTAGCTGCTTTTCTCCATCT  
>HPV16\_Alpha\_9627100\_nt7744\_AOS\_rc|1  
ACACAGTTCATGTATGAACTAGGGTGACATTTAGTTGGCCTTAGAAGTTTAAACCTTATG  
>HPV16\_Alpha\_9627100\_nt7072\_AOS\_rc|2  
TTAGCAGTTGTAGAGGTAGATGAGGTGGTGGGTGAGCTTTTCGTTTTTCCTAATGTAAAT  
>HPV16\_Alpha\_9627100\_nt6912\_AOS\_rc|1  
AAGTGTATTTTTTAAGGGGATCATCTTCTTTAGGTGCTGGAGGTGTATGTTTTTGACAAG  
>HPV16\_Alpha\_9627100\_nt6893\_AOS\_rc|1  
ATCATCTTCTTTAGGTGCTGGAGGTGTATGTTTTTGACAAGCAATTGCCTGGGTTACAAA  
>HPV16\_Alpha\_9627100\_nt6445\_AOS\_rc|1  
TTTGAAGTGGCTAAATTTGCAGTAGACCCAGAGCCTTTAATGTATAAAATCGTCTGGTACA  
>HPV16\_Alpha\_9627100\_nt6437\_AOS\_rc|1  
GGCTAAATTTGCAGTAGACCCAGAGCCTTTAATGTATAAAATCGTCTGGTACATTTTCACC  
>HPV16\_Alpha\_9627100\_nt5494\_AOS\_rc|1  
AATAATTGTATATTGTGGAGACCCTGGAAGTATAGGAATTAATGAAGGAGCTTGGTCAGT  
>HPV16\_Alpha\_9627100\_nt5487\_AOS\_rc|1  
GTATATTGTGGAGACCCTGGAAGTATAGGAATTAATGAAGGAGCTTGGTCAGTTATATTA  
>HPV16\_Alpha\_9627100\_nt3973\_AOS\_rc|1  
TACAATAAAACACCTAAACGCAGAGGCTGCTGTTATCCACAATAGTAATACCAATATTAT  
>HPV5\_Beta\_9627145\_nt5089\_AOS\_rc|1  
TATTAGTCAAAGAGAAACCCCTCCTACGGCCTACAGATTGATTGCGTGGCAATGGAGTAC  
>HPV5\_Beta\_9627145\_nt6974\_AOS\_rc|1  
GCATTATAGTCTGCAACATCTTTTAGTGCTCCAGCCTGATTATATACAGAAATACTGAAA  
>HPV5\_Beta\_9627145\_nt5159\_AOS\_rc|1  
AAACGAACTAACTTAGATGGTTGAGTTAGAAACAATGGATTGTCCACTTGTACCTGCTGT  
>HPV5\_Beta\_9627145\_nt4026\_AOS\_rc|1  
ATGTATTTAATTTTAGCTCTGTTGCGGACATTTTTCAGTGTGTTAGCCGCCCCCTTGACA  
>HPV5\_Beta\_9627145\_nt4019\_AOS\_rc|1  
TAATTTTAGCTCTGTTGCGGACATTTTTCAGTGTGTTAGCCGCCCCCTTGACAATGATTA  
>HPV5\_Beta\_9627145\_nt2365\_AOS\_rc|1  
TGTATATCCAACAAGGGTCTGTTACATCATCCAATAGAGCTATCTTGCACTCTGAAAGGG  
>HPV5\_Beta\_9627145\_nt2174\_AOS\_rc|1  
GGCACTGAGTGTAGGAATTCTTTTAATGCAGTTAGGAATACAATAAAGTTTATATTTTGG  
>HPV5\_Beta\_9627145\_nt215\_AOS\_rc|1  
AGTCTCTAATACTTAAAGGTAATTCTGCCTTATCTTTTTCTGTCAGTTTCTGTTGGTGT  
>HPV5\_Beta\_9627145\_nt208\_AOS\_rc|1  
AATACTTAAAGGTAATTCTGCCTTATCTTTTTCTGTCAGTTTCTGTTGGTGTTCGGCTCC  
>HPV10\_Alpha\_9627257\_nt7080\_AOS\_rc|3  
GATCCTGCTTCTCGGTGGGGGTGTATCTTCTGACAAGTAATGGCTGAAGAGGACAAAA  
>HPV10\_Alpha\_9627257\_nt6618\_AOS\_rc|3

CAACGTCTCGCCCCCACC GTT GCTCTTTAATATGAAAGTGTCTGGGATGGCGTCTCCAA  
>HPV10\_Alpha\_9627257\_nt6609\_AOS\_rc|2  
GCCCCCACC GTT GCTCTTTAATATGAAAGTGTCTGGGATGGCGTCTCCAACAGCACTAG  
>HPV10\_Alpha\_9627257\_nt6600\_AOS\_rc|3  
CGTTGCTCTTTAATATGAAAGTGTCTGGGATGGCGTCTCCAACAGCACTAGCCCGATTAA  
>HPV10\_Alpha\_9627257\_nt5534\_AOS\_rc|1  
TGGAAAGTGTAGAAGACAAAGGGGAAGTGGTATTATATCCCCTGGACTGTGTGGTACTAC  
>HPV10\_Alpha\_9627257\_nt5527\_AOS\_rc|1  
TGTAGAAGACAAAGGGGAAGTGGTATTATATCCCCTGGACTGTGTGGTACTACGATATCC  
>HPV10\_Alpha\_9627257\_nt5520\_AOS\_rc|2  
GACAAAGGGGAAGTGGTATTATATCCCCTGGACTGTGTGGTACTACGATATCCCCTCTGTA  
>HPV10\_Alpha\_9627257\_nt5513\_AOS\_rc|1  
GGGAAGTGGTATTATATCCCCTGGACTGTGTGGTACTACGATATCCCCTCTGTAAAAGCAA  
>HPV10\_Alpha\_9627257\_nt5506\_AOS\_rc|1  
GGTATTATATCCCCTGGACTGTGTGGTACTACGATATCCCCTCTGTAAAAGCAACATCACC  
>HPV10\_Alpha\_9627257\_nt5499\_AOS\_rc|1  
TATCCCCTGGACTGTGTGGTACTACGATATCCCCTCTGTAAAAGCAACATCACCATCATCA  
>HPV26\_Alpha\_9627305\_nt7307\_AOS\_rc|1  
TATAAGGGACACCACCTAAGGTTCCCTCCCATACCTCAGGGGTAAAACAAATGACAAATA  
>HPV26\_Alpha\_9627305\_nt7291\_AOS\_rc|1  
TAAGGTTCCCTCCCATACCTCAGGGGTAAAACAAATGACAAATAGTGTAGTAAAGACATG  
>HPV26\_Alpha\_9627305\_nt7283\_AOS\_rc|1  
CTCCCATTACCTCAGGGGTAAAACAAATGACAAATAGTGTAGTAAAGACATGTAACCATG  
>HPV26\_Alpha\_9627305\_nt7275\_AOS\_rc|1  
ACCTCAGGGGTAAAACAAATGACAAATAGTGTAGTAAAGACATGTAACCATGCATGAAGA  
>HPV26\_Alpha\_9627305\_nt5390\_AOS\_rc|1  
GAAGATGTGGGCGTGTAATGTCTGACCCACTATATACAGGTAGTTCAAATGAGGTGGAT  
>HPV26\_Alpha\_9627305\_nt5377\_AOS\_rc|1  
TGTAATGTCTGACCCACTATATACAGGTAGTTCAAATGAGGTGGATAAAGGCACAGTAA  
>HPV26\_Alpha\_9627305\_nt5316\_AOS\_rc|1  
ATTGGTAGTGGAAGTATTAATAGAGGAAAACACATTGGAGGCATATCTTGGAACCTGGTAA  
>HPV26\_Alpha\_9627305\_nt5309\_AOS\_rc|1  
GTGGAAGTATTAATAGAGGAAAACACATTGGAGGCATATCTTGGAACCTGGTAATGTTGTA  
>HPV26\_Alpha\_9627305\_nt5302\_AOS\_rc|1  
TATTAATAGAGGAAAACACATTGGAGGCATATCTTGGAACCTGGTAATGTTGTAGGGGAAT  
>HPV26\_Alpha\_9627305\_nt5291\_AOS\_rc|1  
GAAACACATTGGAGGCATATCTTGGAACCTGGTAATGTTGTAGGGGAATATGACATGCGC  
>HPV32\_Alpha\_9627327\_nt7703\_AOS\_rc|1  
AAATACAGTAGTCATAACATGAACAAAGGAAGAAGGAAATAAGTAAATGCAAAGCTATGC  
>HPV32\_Alpha\_9627327\_nt7687\_AOS\_rc|1  
ACATGAACAAAGGAAGAAGGAAATAAGTAAATGCAAAGCTATGCCAACCTTTCTAAACAA  
>HPV32\_Alpha\_9627327\_nt4954\_AOS\_rc|1  
AAGAGTCTACCATTACCCTCTACTGGCAAAGAAGGCCGTAAAGTAAAAGGATCACTGTAT  
>HPV32\_Alpha\_9627327\_nt4946\_AOS\_rc|1  
ACCATTACCCTCTACTGGCAAAGAAGGCCGTAAAGTAAAAGGATCACTGTATACTGGATT  
>HPV32\_Alpha\_9627327\_nt4927\_AOS\_rc|1  
AAAGAAGGCCGTAAAGTAAAAGGATCACTGTATACTGGATTGTGGGACGTAGTAGATGCA  
>HPV32\_Alpha\_9627327\_nt4909\_AOS\_rc|1  
AAAGGATCACTGTATACTGGATTGTGGGACGTAGTAGATGCAACCCTTATAGTATTGGTG  
>HPV32\_Alpha\_9627327\_nt4313\_AOS\_rc|1  
GTACTAATATACAAATAAACACTGTGGCTAAAAACCACAGCAGCAGCCACACATCGCCAT  
>HPV32\_Alpha\_9627327\_nt4298\_AOS\_rc|1  
TAAACACTGTGGCTAAAAACCACAGCAGCAGCCACACATCGCCATTTTCTAAAGTACAAT  
>HPV32\_Alpha\_9627327\_nt4289\_AOS\_rc|1  
TGGCTAAAAACCACAGCAGCAGCCACACATCGCCATTTTCTAAAGTACAATGTACCATAT



>HPV32\_Alpha\_9627327\_nt4282\_AOS\_rc|1  
AAACCACAGCAGCAGCCACACATCGCCATTTTCTAAAGTACAATGTACCATATTATCACG  
>HPV34\_Alpha\_9627334\_nt7302\_AOS\_rc|1  
AAACCTTTGTGCTAAAACAGCACAAACAGACCAAACATGTTATAGTATAGGCAACCGAA  
>HPV34\_Alpha\_9627334\_nt4466\_AOS\_rc|1  
CCACAGATGTTGTTACATTAAATCCAGAACTAGAAGGCACTATGGAGGTAGGACCTGGCA  
>HPV34\_Alpha\_9627334\_nt4457\_AOS\_rc|1  
TTGTTACATTAAATCCAGAACTAGAAGGCACTATGGAGGTAGGACCTGGCACACCAGCTT  
>HPV34\_Alpha\_9627334\_nt4338\_AOS\_rc|1  
GTAATAACAGGAGGTCTGGTAGGTTGCAAAGGAATTTCAACTGGTCTAGATGGAGTAGTT  
>HPV34\_Alpha\_9627334\_nt4325\_AOS\_rc|1  
GTCTGGTAGGTTGCAAAGGAATTTCAACTGGTCTAGATGGAGTAGTTGTGGGTAATGGCA  
>HPV34\_Alpha\_9627334\_nt4316\_AOS\_rc|1  
GTTGCAAAGGAATTTCAACTGGTCTAGATGGAGTAGTTGTGGGTAATGGCACATATCCTG  
>HPV34\_Alpha\_9627334\_nt3909\_AOS\_rc|1  
TTAACAGGGATTGGGACACATGTAAAAAGTAATTATAATCAAAAGCAATAACCATGCAT  
>HPV34\_Alpha\_9627334\_nt3138\_AOS\_rc|1  
TATAATCTACATGGCTACTCACTTTATACCACTTGCCTTCCAACCAATAATACACAAATG  
>HPV34\_Alpha\_9627334\_nt739\_AOS\_rc|1  
CATAAGCAGGTCTTCTAACACTAATAGGTCAGCGTGTGTGCTCTCAATGGTAAGACACAC  
>HPV34\_Alpha\_9627334\_nt317\_AOS\_rc|1  
TAAATTCTCTAACGTCCGTCCATACACTGATTGGTTATATCTTCTATATTGTCTAACCTT  
>HPV49\_Beta\_9627363\_nt7123\_AOS\_rc|1  
CAAAAGTTATACTGCTCATATGGATCTTTTCTTTCTGGAGCAGGTTGTTTGTCTAGGGCAT  
>HPV49\_Beta\_9627363\_nt6649\_AOS\_rc|2  
ATGGAGCTGCCAAGAGTATTTTGGGCCTGTTGACTTGCTGCAGGTAATATGTAATTGTTA  
>HPV49\_Beta\_9627363\_nt6639\_AOS\_rc|1  
CAAGAGTATTTTGGGCCTGTTGACTTGCTGCAGGTAATATGTAATTGTTATCCTGACCTA  
>HPV49\_Beta\_9627363\_nt5574\_AOS\_rc|1  
AATCTTGTACATAAAAGGTATCAGATCTGGGAGTAGAGAAGCGGGGTACAGTAAATGTGG  
>HPV49\_Beta\_9627363\_nt470\_AOS\_rc|1  
GCTTTTCCAACAAATCTAGCCTCTTAAGGCAAATGAGACATCTGACTACTATCTCAGCAA  
>HPV49\_Beta\_9627363\_nt413\_AOS\_rc|1  
CAATATTAGCCGCTGCTCGTCTTCTATTTCGATGCCTACGACAATTTCTTGGTGATAAT  
>HPV49\_Beta\_9627363\_nt406\_AOS\_rc|1  
AGCCGCTGCTCGTCTTCTATTTTCGATGCCTACGACAATTTCTTGGTGATAATTAGTAAA  
>HPV53\_Alpha\_9627377\_nt7601\_AOS\_rc|1  
GCAGCCTACAGTAAGTGACTAATAGGTAAGGCATAGTGTATAAAACAAAAAACATTAAA  
>HPV53\_Alpha\_9627377\_nt7445\_AOS\_rc|1  
AATGGAGGGTACCAAAAAGGCGCCAAACTAAAATGGATACCTATAAGCTATACTATATGT  
>HPV53\_Alpha\_9627377\_nt7121\_AOS\_rc|1  
ACATACACAATACAGACACACAACATACTATTTGCGTTTTCGCTTGGAGGAGGGGGCTGA  
>HPV53\_Alpha\_9627377\_nt7114\_AOS\_rc|1  
CAATACAGACACACAACATACTATTTGCGTTTTCGCTTGGAGGAGGGGGCTGAGGTAGAT  
>HPV53\_Alpha\_9627377\_nt7106\_AOS\_rc|1  
ACACACAACATACTATTTGCGTTTTCGCTTGGAGGAGGGGGCTGAGGTAGATGTAGTAGA  
>HPV53\_Alpha\_9627377\_nt5495\_AOS\_rc|1  
TATCAAAAGGAGATTGAGGTGCATAAGGCCATGTAGGGGTCTGTGGGCAACACTACAT  
>HPV53\_Alpha\_9627377\_nt1374\_AOS\_rc|1  
TGTATTTGTTGCACTGGCATTATATCCTGTCTATCCACATCCATATCACTTCCTGACCCT  
>HPV53\_Alpha\_9627377\_nt1003\_AOS\_rc|1  
GTGTAGATATTATATTACTATTGTCTATAAACCCATCCAAATCAGATTTCGGTGCTTTTCCT  
>HPV53\_Alpha\_9627377\_nt996\_AOS\_rc|1  
TATTATATTACTATTGTCTATAAACCCATCCAAATCAGATTTCGGTGCTTTTCCTCGTCTGT  
>HPV53\_Alpha\_9627377\_nt304\_AOS\_rc|1

TACACTGAACAATTGTAATATCTTAATTTTCGGACCTTACTATAAAAATAGCAAACAGAAT  
>HPV7\_Alpha\_9627389\_nt7661\_AOS\_rc|1  
ACATGGTGACTTGCCAACCGAGACTGGAAACGGTTATGGGTGGAAATTGAAGGATTTATA  
>HPV7\_Alpha\_9627389\_nt7654\_AOS\_rc|1  
GACTTGCCAACCGAGACTGGAAACGGTTATGGGTGGAAATTGAAGGATTTATATAGTTAT  
>HPV7\_Alpha\_9627389\_nt5532\_AOS\_rc|1  
ATTTGCTATGCGTGTAGAATTACCTGGATACAAGGAATAGGTAGAAGTTGGTGTATTATT  
>HPV7\_Alpha\_9627389\_nt4044\_AOS\_rc|1  
AAGAATAGAAAATAGTGGCCATCAAAGAGCTCCAGACACAGAAATCAGGTATATGCATGCA  
>HPV7\_Alpha\_9627389\_nt3461\_AOS\_rc|1  
TGATGGACAAGTCTCCGTCTCTCCTTCGCTTTCGGGGCGGTGCGTGGCTGTCGTTGTATA  
>HPV7\_Alpha\_9627389\_nt1393\_AOS\_rc|1  
CTACCACCTGTGTACGCGGACTAAGTTGCTGTATAACATCACTGCTTCTCTTAGCACTT  
>HPV7\_Alpha\_9627389\_nt1375\_AOS\_rc|1  
GACTAAGTTGCTGTATAACATCACTGCTTCTTCTAGCACTTCAACCGCTTCCGTTTCAA  
>HPV7\_Alpha\_9627389\_nt1368\_AOS\_rc|1  
TTGCTGTATAACATCACTGCTTCTTCTAGCACTTCAACCGCTTCCGTTTCAACTGTCGC  
>HPV7\_Alpha\_9627389\_nt1360\_AOS\_rc|2  
TAACATCACTGCTTCTTCTAGCACTTCAACCGCTTCCGTTTCAACTGTCGCAGCCCTCC  
>HPV7\_Alpha\_9627389\_nt1343\_AOS\_rc|1  
TCTAGCACTTCAACCGCTTCCGTTTCAACTGTCGCAGCCCTCCCACTGCCCCCTCTATA  
>HPV9\_Beta\_9627396\_nt7206\_AOS\_rc|1  
AGGTTTCGCCCTTCTCTTAGCATTTTTAGATGTTTTAACAGATGTTTTAATAGGACGTTTTTC  
>HPV9\_Beta\_9627396\_nt6606\_AOS\_rc|1  
ACCCACTTACTGTAGGATAGTAGGTGGAATTAGCTATTGTTTCGTTGTTGTTGATCACTTT  
>HPV9\_Beta\_9627396\_nt6591\_AOS\_rc|1  
GATAGTAGGTGGAATTAGCTATTGTTTCGTTGTTGTTGATCACTTTTTGCTGGCAAAAAGA  
>HPV9\_Beta\_9627396\_nt4763\_AOS\_rc|1  
TCTATGTTTTTCAGAAGATGCTGTGTATGATTCCCTAGGACCACCTACTAGCTGGCCCCCA  
>HPV9\_Beta\_9627396\_nt3918\_AOS\_rc|1  
ATGTGTCAAAGGCTAAAATCATTCGCGCTCTTCCAACCTCTATCACAACCTGTCTTCCCCTA  
>HPV9\_Beta\_9627396\_nt3831\_AOS\_rc|1  
TTACTAAGCCTCTTTTTTTTTTTTTCGCTTCCCGAAAGCGATAGCACTTAAGCACATTGGCGT  
>HPV9\_Beta\_9627396\_nt825\_AOS\_rc|1  
CAGTTGTATATCACCCAGCAAAAGTTCCGTGTTGCGCTCGAATTCCTAAATTTGTAGCAAG  
>HPV9\_Beta\_9627396\_nt789\_AOS\_rc|1  
TCGAATTCCCTAAATTTGTAGCAAGCACGTATAAACGAAGTCTTGCACCGCAACCACAGCC  
>HPV9\_Beta\_9627396\_nt768\_AOS\_rc|1  
AAGCACGTATAAACGAAGTCTTGCACCGCAACCACAGCCAGCTACGATCTTGTAGGGAGT  
>HPV54\_Alpha\_9628437\_nt7521\_AOS\_rc|1  
TAAATCAATGTTGGAATGCAAAGGGCGTGTTTTTACACAATGGAAAGTGAAGTTGTTCTG  
>HPV54\_Alpha\_9628437\_nt7511\_AOS\_rc|1  
TTGGAATGCAAAGGGCGTGTTTTTACACAATGGAAAGTGAAGTTGTTCTGACAGTTATAA  
>HPV54\_Alpha\_9628437\_nt4184\_AOS\_rc|1  
TTTCCGGCGTGGGGCTCTTGCTTTAGCCATAATACACAAATATATCTACACAATATTTAT  
>HPV54\_Alpha\_9628437\_nt3162\_AOS\_rc|1  
TCCATATTCCCCATACTTAGATGCTTCCTTTTTTAAATCCACATAATACACTTTGTGTTC  
>HPV54\_Alpha\_9628437\_nt3153\_AOS\_rc|1  
CCCATACTTAGATGCTTCCTTTTTTAAATCCACATAATACACTTTGTGTCTGCATCCAT  
>HPV54\_Alpha\_9628437\_nt2990\_AOS\_rc|1  
TTATCCTGATGCCCATCAAATATAACATCTACTGTTTGTCCACGTCTTTTTTAAGCAACCA  
>HPV54\_Alpha\_9628437\_nt1334\_AOS\_rc|1  
TGCTACACGAATATTTGTGTTATGTATTAATTCTGTAATTTGCTGCCTTCCTAGGCTATC  
>HPV54\_Alpha\_9628437\_nt1315\_AOS\_rc|1  
TTATGTATTAAATCTGTAATTTGCTGCCTTCCTAGGCTATCTGTAGTTGTTTCCCAGAT

>HPV54\_Alpha\_9628437\_nt201\_AOS\_rc|1  
CAAATAGGTCTTATATTGAAATGCATAAATCTCTGCTGTACACACCGTCTTCTTGCAAA  
>HPV24\_Unclassified\_9628486\_nt6245\_AOS\_rc|1  
TGAATTACTGAATTTACTAACTTAATAGGTGGACATCTACCAGCATCATTATTATCACCA  
>HPV24\_Unclassified\_9628486\_nt6237\_AOS\_rc|2  
TGAATTTACTAACTTAATAGGTGGACATCTACCAGCATCATTATTATCACCAGCACACCT  
>HPV24\_Unclassified\_9628486\_nt1745\_AOS\_rc|1  
TCAGTGTGTTGTTCTATAATCCATTTAGGATAAGACCCATGTGTAAAGGTAGCAGCATTTG  
>HPV24\_Unclassified\_9628486\_nt1629\_AOS\_rc|1  
GATAAAATTTGCTCCTCTGCCACATATAACATAGACACTAATAACCTTATAACAGTTTGT  
>HPV24\_Unclassified\_9628486\_nt1571\_AOS\_rc|1  
GTCTATTTTTGCCAGCCTTGAAACACAACAGATATAAAAACATTGCAGACATTTCTGTAA  
>HPV24\_Unclassified\_9628486\_nt441\_AOS\_rc|1  
CACCTTACAATAATGTCCGAAAGAGGTGTATTTTCTTTTTGTTCTATTTCCCAACCTATC  
>HPV24\_Unclassified\_9628486\_nt434\_AOS\_rc|1  
CAATAATGTCCGAAAGAGGTGTATTTTCTTTTTGTTCTATTTCCCAACCTATCACACTCT  
>HPV24\_Unclassified\_9628486\_nt427\_AOS\_rc|1  
GTCCGAAAGAGGTGTATTTTCTTTTTGTTCTATTTCCCAACCTATCACACTCTCTACAAA  
>HPV24\_Unclassified\_9628486\_nt419\_AOS\_rc|1  
GAGGTGTATTTTCTTTTTGTTCTATTTCCCAACCTATCACACTCTCTACAAAATAATTTT  
>HPV24\_Unclassified\_9628486\_nt193\_AOS\_rc|1  
ATTTAATAATCTACTAAGTTCTAACACTGACTGAGGTTTACCTGGTTGAGCCATCAAGAT  
>HPV48\_Gamma\_9628542\_nt6713\_AOS\_rc|1  
TATTAATAATGTAAACATTCTACATCTTTACTATCTTACTCTCCTACGCTTTGTAGATCT  
>HPV48\_Gamma\_9628542\_nt5284\_AOS\_rc|1  
TTACCAACTATTAAAAGTCTTTTCAGTGCTTGTATAAAAAATATACATCCGTTTCTTGCACG  
>HPV48\_Gamma\_9628542\_nt5113\_AOS\_rc|1  
TCGTTTCTTACGTGGAATAAAAAAGGGATCTAAAGCAAAGTCTGAGTAACTATCAAATAA  
>HPV48\_Gamma\_9628542\_nt5101\_AOS\_rc|1  
TGGAATAAAAAAGGGATCTAAAGCAAAGTCTGAGTAACTATCAAATAAAGGGAACCAATT  
>HPV48\_Gamma\_9628542\_nt4718\_AOS\_rc|1  
TAGCTTCTGTTGATATTGCAGACAAATCCATATAATAATGTACTTTAGGGCCTATAGTTA  
>HPV48\_Gamma\_9628542\_nt4228\_AOS\_rc|1  
AATAGCATTATTTAAAAATGGGTTTACCTGTGTTTGCAAGATAGTTTGTGTATAAGAATC  
>HPV48\_Gamma\_9628542\_nt4217\_AOS\_rc|1  
TTAAAAATGGGTTTACCTGTGTTTGCAAGATAGTTTGTGTATAAGAATCATAAAACAACT  
>HPV48\_Gamma\_9628542\_nt2990\_AOS\_rc|1  
TCCATATTTTACAGCATCAGGTTGAAATAAAGTAAAGTATACAAAATCACCATTTAGATC  
>HPV48\_Gamma\_9628542\_nt2327\_AOS\_rc|1  
TCGGAATAATGAAACACGTAAGTCTACTTCTCAAATAAAATAGAGATTCATCAGTTGTTA  
>HPV48\_Gamma\_9628542\_nt2319\_AOS\_rc|1  
TTGAAACACGTAAGTCTACTTCTCAAATAAAATAGAGATTCATCAGTTGTTACATTAACA  
>HPV50\_Gamma\_9628550\_nt6292\_AOS\_rc|1  
CTTTGAGTACATATAAGAACTTGCTACATTTAAAGGATCCAAAGGATTGACATCTTTCTT  
>HPV50\_Gamma\_9628550\_nt5145\_AOS\_rc|1  
ATGCGTCTTCTTTTTGGAAGAAGACCTGGATGTAAATCATAATCTGAATAATCTAAAACA  
>HPV50\_Gamma\_9628550\_nt5096\_AOS\_rc|1  
AATCTAAAACAAAAAGGGGCTGTTTCAGAAACATTTGATTTTACTATCAAGGATGCATCTA  
>HPV50\_Gamma\_9628550\_nt4938\_AOS\_rc|1  
TTTTCTTCATCAGTAGCTGGTATAACTAAATGAGACTCTGTAAAATTATGTTCAACATCG  
>HPV50\_Gamma\_9628550\_nt4929\_AOS\_rc|1  
TCAGTAGCTGGTATAACTAAATGAGACTCTGTAAAATTATGTTCAACATCGTCTGTTAAT  
>HPV50\_Gamma\_9628550\_nt4274\_AOS\_rc|1  
CAAAGCTGGGGTCAACTAATACATTAACATTATTTATGTCTGGATTTATGAAGGGATTAA  
>HPV50\_Gamma\_9628550\_nt4251\_AOS\_rc|1

TTAACATTATTTATGTCTGGATTTATGAAGGGATTAATCTGTGTTTCAAAAGTTGCTGCT  
>HPV50\_Gamma\_9628550\_nt4244\_AOS\_rc|1  
TATTTATGTCTGGATTTATGAAGGGATTAATCTGTGTTTCAAAAGTTGCTGCTATAGTAG  
>HPV50\_Gamma\_9628550\_nt1337\_AOS\_rc|1  
TAGAAGCTTCAATTAAATCTTCTGCACAGGCAAAACTACAATAATCCAATTTTGTGTAC  
>HPV60\_Gamma\_9628566\_nt5555\_AOS\_rc|1  
ATAACTCTAAACTGATTTCCACTACATTTAGGTACAGTAATATTATTTGAACCACTGTCT  
>HPV60\_Gamma\_9628566\_nt5049\_AOS\_rc|1  
AGTTTTCTGTAAATTCATCCTCTAGTATATTGTCAGGTATTAGGCCTTCATTTGTAGTTT  
>HPV60\_Gamma\_9628566\_nt5042\_AOS\_rc|1  
TGTAATTCATCCTCTAGTATATTGTCAGGTATTAGGCCTTCATTTGTAGTTTCAGTTAA  
>HPV60\_Gamma\_9628566\_nt4903\_AOS\_rc|1  
GTTTCTGCAGCTGGAATATCACTAATATCAAAATAAAAGTGAACCTTCTGACCAATAGTT  
>HPV60\_Gamma\_9628566\_nt3700\_AOS\_rc|2  
TATATGTACAACCTCTTGGCAAAGTTACTAATTTTATAAAAACATCTCGTTGTGTGGTAT  
>HPV60\_Gamma\_9628566\_nt3684\_AOS\_rc|1  
TGGCAAAGTTACTAATTTTATAAAAACATCTCGTTGTGTGGTATCATTA AAAACA ACTAA  
>HPV60\_Gamma\_9628566\_nt3659\_AOS\_rc|1  
ACATCTCGTTGTGTGGTATCATTA AAAACA ACTAACAATTTATGTCTAGAAGATTCTGGT  
>HPV60\_Gamma\_9628566\_nt3650\_AOS\_rc|1  
TGTGTGGTATCATTA AAAACA ACTAACAATTTATGTCTAGAAGATTCTGGTACGTCTATG  
>HPV61\_Alpha\_9628574\_nt7738\_AOS\_rc|1  
GTCAAAAAAGATAGATGGAGCATTGTTCCAAACTGTGTGTGTTAGCAACCTGTCAAACAC  
>HPV61\_Alpha\_9628574\_nt7533\_AOS\_rc|1  
TACCCGAACACAAGGAACACAGAAATGGGGAAGCTGCACAAAATAAGGCGTGCAACAATA  
>HPV61\_Alpha\_9628574\_nt4298\_AOS\_rc|1  
TGTGGGGAGGGAAAACACACAAGGTACACCACCTAATGTAAAAGCCTGTACAACAGTATT  
>HPV61\_Alpha\_9628574\_nt4291\_AOS\_rc|1  
AGGGAAAACACACAAGGTACACCACCTAATGTAAAAGCCTGTACAACAGTATTGCAATAA  
>HPV61\_Alpha\_9628574\_nt4243\_AOS\_rc|1  
GTATTGCAATAAGCAGTAATAGCAAAAACAAAATAACAATCCGCAGTTTTGCTGATCCA  
>HPV61\_Alpha\_9628574\_nt4234\_AOS\_rc|1  
TAAGCAGTAATAGCAAAAACAAAATAACAATCCGCAGTTTTGCTGATCCACAACCAGTA  
>HPV61\_Alpha\_9628574\_nt4221\_AOS\_rc|1  
CAAAAACAAAATAACAATCCGCAGTTTTGCTGATCCACAACCAGTAATGCAAACCCCTG  
>HPV61\_Alpha\_9628574\_nt4187\_AOS\_rc|1  
TCCACAACCAGTAATGCAAACCCCTGAGGGGAACCTAACAAGGGGATACATATTGCAA  
>HPV61\_Alpha\_9628574\_nt3134\_AOS\_rc|1  
CATAATATAGGCCCTTATATGACACTTTTCCAGGAACCTTATACCACAGATCAGTTTCTG  
>HPV61\_Alpha\_9628574\_nt3127\_AOS\_rc|1  
TAGGCCCTTATATGACACTTTTCCAGGAACCTTATACCACAGATCAGTTTCTGTGCTTTG  
>HPV8\_Beta\_333074\_nt6932\_L1\_AOS|1  
ATGGGGAACTTAAGAACATCACAGACTATAAATCAACCCAGTTCAGAGAATATCTGAGAC  
>HPV8\_Beta\_333074\_nt6473\_L1\_AOS|1  
ACTTTAAGACTTTACAACAGAACAGATCTGATGTAAGTCTCGACATAGTAAATGAGATAT  
>HPV8\_Beta\_333074\_nt6360\_L1\_AOS|1  
AAAAGCCATTCCATGTGCAGAGGACCAACAGCAAGGTCTGTGCCCACCCATTGAACTAAA  
>HPV51\_Alpha\_333087\_nt6559\_L1\_AOS|1  
GCCACTGCTGCGGTTTCCCCAACATTTACTCCAAGTAACCTTTAAGCAATATATTAGGCAT  
>HPV51\_Alpha\_333087\_nt6048\_L1\_AOS|1  
CACACCTGTACCTCCAGGAGACTGCCCCCCCCCTGGAACCTTGATCCTCTGTCAATTCAGGA  
>HPV51\_Alpha\_333087\_nt6041\_L1\_AOS|1  
GCAAAAACACACCTGTACCTCCAGGAGACTGCCCCCCCCCTGGAACCTTGATCCTCTGTCA  
>HPV20\_Beta\_1020162\_nt6739\_L1\_AOS|1  
AATGCATTCTACATTCCACCTGTGAATAATCAGGCACAGAACAACCTAGGTAATTCAATG

>HPV20\_Beta\_1020162\_nt6956\_L1\_AOS|1  
GCATATCAGTTCATTTCAGAAAACACTGATGTTTCTAAAATTCAAATTTATGATTCTCAGA  
>HPV20\_Beta\_1020162\_nt6944\_L1\_AOS|1  
ATACAAATTTTAGCATATCAGTTCATTTCAGAAAACACTGATGTTTCTAAAATTCAAATTT  
>HPV20\_Beta\_1020162\_nt6936\_L1\_AOS|1  
TACTCGAAATACAAATTTTAGCATATCAGTTCATTTCAGAAAACACTGATGTTTCTAAAAT  
>HPV22\_Beta\_1020178\_nt7135\_L1\_AOS|2  
AAACGTTCTGCTACGCGGAAAACGTCTAAAACGTGTAACGAAGGAACTTACCTCTTAA  
>HPV22\_Beta\_1020178\_nt7128\_L1\_AOS|1  
CAGTGTGAAACGTTCTGCTACGCGGAAAACGTCTAAAACGTGTAACGAAGGAACTTAC  
>HPV22\_Beta\_1020178\_nt7121\_L1\_AOS|1  
CCAGGGTCAGTGTGAAACGTTCTGCTACGCGGAAAACGTCTAAAACGTGTAACGAAGGA  
>HPV22\_Beta\_1020178\_nt7114\_L1\_AOS|1  
GCCAGTGCCAGGGTCAGTGTGAAACGTTCTGCTACGCGGAAAACGTCTAAAACGTGTAAC  
>HPV22\_Beta\_1020178\_nt7107\_L1\_AOS|2  
TGCAAGGGCCAGTGTGCAAGGGTCAGTGTGAAACGTTCTGCTACGCGGAAAACGTCTAAAAC  
>HPV23\_Beta\_1020186\_nt7100\_L1\_AOS|2  
CAGCGTGTACGGTCCGGTACCAAACGGCCTGCAAACTCGAAAAGTGACCAAACTGTCAAA  
>HPV23\_Beta\_1020186\_nt7120\_L1\_AOS|2  
CAAACGGCCTGCAAACTCGAAAAGTGACCAAACTGTCAAAAGGAAAAAGTGCAATTGTA  
>HPV23\_Beta\_1020186\_nt7113\_L1\_AOS|1  
CCGGTACCAAACGGCCTGCAAACTCGAAAAGTGACCAAACTGTCAAAAGGAAAAAGTGCA  
>HPV23\_Beta\_1020186\_nt7093\_L1\_AOS|1  
TGGAGTGCAGCGTGTACGGTCCGGTACCAAACGGCCTGCAAACTCGAAAAGTGACCAAAAC  
>HPV23\_Beta\_1020186\_nt7086\_L1\_AOS|1  
TTCAAATTTGGAGTGCAGCGTGTACGGTCCGGTACCAAACGGCCTGCAAACTCGAAAAGTGA  
>HPV23\_Beta\_1020186\_nt6046\_L1\_AOS|1  
TGCAGAAAATTTCTAGTGAACGTTCAGGAAGGTACTGTAGATGACAGAAGAAATATCTCATTT  
>HPV28\_Alpha\_1020202\_nt6496\_L1\_AOS|1  
CAACTTTTTCGCTCGGCATTTTTTTTAAATAGAGCTGGTGTGCTGGGGACACCATTCCTGAA  
>HPV28\_Alpha\_1020202\_nt7188\_L1\_AOS|1  
ACGTCCAGCGTCCACCACGAGAGGATCGTCTGCTGCAAAACGAAAACGCGCCAAAAAGTA  
>HPV28\_Alpha\_1020202\_nt7181\_L1\_AOS|1  
TTCGCAAACGTCCAGCGTCCACCACGAGAGGATCGTCTGCTGCAAAACGAAAACGCGCCA  
>HPV28\_Alpha\_1020202\_nt6503\_L1\_AOS|1  
TCGCTCGGCATTTTTTTTAAATAGAGCTGGTGTGCTGGGGACACCATTCCTGAAACATTGT  
>HPV29\_Alpha\_1020210\_nt7244\_L1\_AOS|1  
CGTTTCAGTAGTCCCTCCAGAAAGCGCCGAACGACCACCACGGCCCCCACCCTGCAAAG  
>HPV29\_Alpha\_1020210\_nt7264\_L1\_AOS|1  
AAAGCGCCGAACGACCACCACGGCCCCCACCCTGCAAAGCGAAAACGCTCGAAAAAGTA  
>HPV29\_Alpha\_1020210\_nt7257\_L1\_AOS|1  
CCTCCAGAAAGCGCCGAACGACCACCACGGCCCCCACCCTGCAAAGCGAAAACGCTCGA  
>HPV29\_Alpha\_1020210\_nt7237\_L1\_AOS|1  
GCGCCGGCGTTCAGTAGTCCCTCCAGAAAGCGCCGAACGACCACCACGGCCCCCACCCT  
>HPV29\_Alpha\_1020210\_nt6611\_L1\_AOS|1  
GTAGGGGACAAAATCCCAGATTCTTGTACTTAAAGGGTAACAACGGGCGAGAACTCCT  
>HPV29\_Alpha\_1020210\_nt6604\_L1\_AOS|1  
TGGTGTAGTAGGGGACAAAATCCCAGATTCTTGTACTTAAAGGGTAACAACGGGCGAGA  
>HPV29\_Alpha\_1020210\_nt6597\_L1\_AOS|1  
ATCGTGTGTTAGTAGGGGACAAAATCCCAGATTCTTGTACTTAAAGGGTAACAACG  
>HPV29\_Alpha\_1020210\_nt6588\_L1\_AOS|2  
ACTTCTTTAATCGTGTGTTAGTAGGGGACAAAATCCCAGATTCTTGTACTTAAAGG  
>HPV36\_Beta\_1020218\_nt6692\_L1\_AOS|1  
GGTGACGACATCCCTGACGCCAGAATTGATAATGGGACTTTTAAGAATCAGTTTTTCATT  
>HPV36\_Beta\_1020218\_nt6701\_L1\_AOS|1

ATCCCTGACGCCAGAATTGATAATGGGACTTTTAAGAATCAGTTTTTCATTCCTGGGGCT  
>HPV37\_Beta\_1020226\_nt7176\_L1\_AOS|1  
TAGACCTAGAAATTGTTTCGATCGTCTGTAAAAGTGTCTAAAGGTACAAAGCGTAAACGGTC  
>HPV37\_Beta\_1020226\_nt7162\_L1\_AOS|1  
TCGGGATTGCAAAGTAGACCTAGAATTGTTTCGATCGTCTGTAAAAGTGTCTAAAGGTACA  
>HPV37\_Beta\_1020226\_nt7155\_L1\_AOS|1  
CTTTCAGTCGGGATTGCAAAGTAGACCTAGAATTGTTTCGATCGTCTGTAAAAGTGTCTAA  
>HPV37\_Beta\_1020226\_nt7147\_L1\_AOS|1  
AAATTCATCTTTCAGTCGGGATTGCAAAGTAGACCTAGAATTGTTTCGATCGTCTGTAAAA  
>HPV37\_Beta\_1020226\_nt7140\_L1\_AOS|1  
AGGGAGGAAATTCATCTTTCAGTCGGGATTGCAAAGTAGACCTAGAATTGTTTCGATCGTC  
>HPV37\_Beta\_1020226\_nt6528\_L1\_AOS|1  
TATTCCCAGATGGCACTGTTAATCAGGACCACAAATATTACTTACCTGCCAAATCAGACCA  
>HPV37\_Beta\_1020226\_nt6225\_L1\_AOS|1  
TAAAGCACCAAGTTTGTGCATCAGAGGAAAATAATCAGACAGGACAGTGTCCACCACTTGA  
>HPV38\_Beta\_1020234\_nt7123\_L1\_AOS|1  
GAACACGTGCTGTCAAACGGCCGTTAGTAAGAAAAATCTTCCAAATCTGTAAACGCAAAA  
>HPV38\_Beta\_1020234\_nt7116\_L1\_AOS|2  
ACAGCACGAACACGTGCTCAAACGGCCGTTAGTAAGAAAAATCTTCCAAATCTGTAAAA  
>HPV38\_Beta\_1020234\_nt7109\_L1\_AOS|1  
TTTACAAACAGCACGAACACGTGCTGTCAAACGGCCGTTAGTAAGAAAAATCTTCCAAATC  
>HPV38\_Beta\_1020234\_nt6918\_L1\_AOS|1  
CCAGACAATTCTGTACACGATACATATCGTTACATAACATCTAAAGCAACTAAATGTCCA  
>HPV38\_Beta\_1020234\_nt6911\_L1\_AOS|2  
ACCCACCCCAGACAATTCTGTACACGATACATATCGTTACATAACATCTAAAGCAACTAA  
>HPV38\_Beta\_1020234\_nt6904\_L1\_AOS|1  
GCTTTGTACCCACCCCAGACAATTCTGTACACGATACATATCGTTACATAACATCTAAAG  
>HPV38\_Beta\_1020234\_nt6480\_L1\_AOS|1  
GGTACTGTCAACCAAAATCATAATTATTATTTACCTGCAAAAAATGGACAGGGTCAACGC  
>HPV38\_Beta\_1020234\_nt6470\_L1\_AOS|1  
TATTCCAGATGGTACTGTCAACCAAAATCATAATTATTATTTACCTGCAAAAAATGGACA  
>HPV55\_Alpha\_1020266\_nt6709\_L1\_AOS|2  
CAATATGTGCTGCTACAACCTCAGTCTCCATCTACAACATATAATAGTACAGAATATAAAC  
>HPV55\_Alpha\_1020266\_nt6717\_L1\_AOS|1  
GCTGCTACAACCTCAGTCTCCATCTACAACATATAATAGTACAGAATATAACAATACATG  
>HPV55\_Alpha\_1020266\_nt6702\_L1\_AOS|1  
AACATGACAATATGTGCTGCTACAACCTCAGTCTCCATCTACAACATATAATAGTACAGAA  
>HPV55\_Alpha\_1020266\_nt6498\_L1\_AOS|1  
CCACAGGATTTGGTTTTTAAAGGTGCTACTAAAAGTACAGTTCCTAATGCCATATACTTT  
>HPV55\_Alpha\_1020266\_nt6491\_L1\_AOS|1  
GGACATTCCACAGGATTTGGTTTTTAAAGGTGCTACTAAAAGTACAGTTCCTAATGCCAT  
>HPV55\_Alpha\_1020266\_nt6477\_L1\_AOS|1  
GGAACGGTTGGAGAGGACATTCCACAGGATTTGGTTTTTAAAGGTGCTACTAAAAGTACA  
>HPV55\_Alpha\_1020266\_nt6470\_L1\_AOS|1  
TAGGGCGGGAACGGTTGGAGAGGACATTCCACAGGATTTGGTTTTTAAAGGTGCTACTAA  
>HPV66\_Alpha\_1020290\_nt7064\_L1\_AOS|1  
GACCCCTAGACCCAAGGCTAGTGTATCTGCCTCTAAAAGGCGGGCGGCTCCTACCTCTT  
>HPV66\_Alpha\_1020290\_nt7057\_L1\_AOS|2  
GGCCCTAGACCCCTAGACCCAAGGCTAGTGTATCTGCCTCTAAAAGGCGGGCGGCTCCT  
>HPV66\_Alpha\_1020290\_nt7050\_L1\_AOS|1  
GCAACTAGGCCCTAGACCCCTAGACCCAAGGCTAGTGTATCTGCCTCTAAAAGGCGGGC  
>HPV66\_Alpha\_1020290\_nt6861\_L1\_AOS|2  
CCCACCAGTTGCAACTAGCTTAGAGGATAAATATAGGTATATTAAAAGCACAGCTATTAC  
>HPV66\_Alpha\_1020290\_nt6854\_L1\_AOS|1  
GCTTATCCCCACCAGTTGCAACTAGCTTAGAGGATAAATATAGGTATATTAAAAGCACAG

>HPV66\_Alpha\_1020290\_nt6847\_L1\_AOS|2  
AATATTGGCTTATCCCCACCAGTTGCAACTAGCTTAGAGGATAAATATAGGTATATTAAA  
>HPV103\_Unclassified\_109390382\_nt6381\_L1\_AOS|2  
TTTATCTCAAACCTGGGGTTAGCTCGTCTTCTACCTCCTCTAGAAAGCGGTCTCGTGTAGA  
>HPV103\_Unclassified\_109390382\_nt6212\_L1\_AOS|1  
CTTCTATTGGAGATACATACAGATTTTTTAACATCTTTAGCCACACGCTGCCCTGCTGCAG  
>HPV103\_Unclassified\_109390382\_nt6195\_L1\_AOS|2  
TGTACCACCGCCTCCTTCTTCTATTGGAGATACATACAGATTTTTTAACATCTTTAGCCAC  
>HPV103\_Unclassified\_109390382\_nt5992\_L1\_AOS|1  
GTAAATTTTACAATAAATGTTAAGTCAGACGCTGGCGTTGCACAGCAATATGCTGCCACC  
>HPV103\_Unclassified\_109390382\_nt5819\_L1\_AOS|1  
ACCAAAATACAGCCTCCTCGTCTGTTTACTATGCAACCCCCAGTGGATCACTGGTTTCTA  
>HPV103\_Unclassified\_109390382\_nt5809\_L1\_AOS|1  
TCTGACAAAGACCAAAATACAGCCTCCTCGTCTGTTTACTATGCAACCCCCAGTGGATCA  
>HPV103\_Unclassified\_109390382\_nt5796\_L1\_AOS|1  
TTTACAGGGGGCGTCTGACAAAGACCAAAATACAGCCTCCTCGTCTGTTTACTATGCAAC  
>HPV103\_Unclassified\_109390382\_nt5738\_L1\_AOS|1  
GTGTCATGGGCGACAGTATACCTGAGGCTGAATTTGAGGGTGTTAAGCACACCTATATTT  
>HPV103\_Unclassified\_109390382\_nt5724\_L1\_AOS|1  
TTTTTGCTAGGGATGGTGTCTATGGGCGACAGTATACCTGAGGCTGAATTTGAGGGTGTTAA  
>HPV101\_Unclassified\_109390389\_nt6520\_L1\_AOS|1  
GTCCTTCTACGCCTACCAGGCCTACCTCCAGGTCTTCCAAACGCCGACGCAGGCAAGTTT  
>HPV101\_Unclassified\_109390389\_nt6193\_L1\_AOS|1  
TGCAGCTCTGTAAAGTGTCTCTTACTCCCGATGTATTGGCACACATACACTTAATGAATC  
>HPV101\_Unclassified\_109390389\_nt6186\_L1\_AOS|1  
CTCATTGTGCAGCTCTGTAAAGTGTCTCTTACTCCCGATGTATTGGCACACATACACTTA  
>HPV101\_Unclassified\_109390389\_nt6179\_L1\_AOS|1  
AATTTCTCTCATTGTGCAGCTCTGTAAAGTGTCTCTTACTCCCGATGTATTGGCACACAT  
>HPV101\_Unclassified\_109390389\_nt5813\_L1\_AOS|1  
TTATTTTACCCATAATGGCACTGTTGGTGACAGTGTTCCAGAGGAGGGGTTTGAAGGTAA  
>HPV101\_Unclassified\_109390389\_nt4975\_L1\_AOS|1  
GCATCCAAGTCACAGACGCAAACGCAAGCGCAAACGGTCTGGTTTTTAATGTTTTGCAGA  
>HPV101\_Unclassified\_109390389\_nt4968\_L1\_AOS|1  
TTTATTTGCATCCAAGTCACAGACGCAAACGCAAGCGCAAACGGTCTGGTTTTTAATGTT  
>HPV101\_Unclassified\_109390389\_nt4961\_L1\_AOS|1  
GATACATTTTATTTGCATCCAAGTCACAGACGCAAACGCAAGCGCAAACGGTCTGGTTTT  
>HPV101\_Unclassified\_109390389\_nt4954\_L1\_AOS|1  
TGCATTTTGATACATTTTATTTGCATCCAAGTCACAGACGCAAACGCAAGCGCAAACGGTC  
>HPV101\_Unclassified\_109390389\_nt4925\_L1\_AOS|1  
GAACCTCCTATTGTTGTGGATGGTTTTGATGCATTTGATACATTTTATTTGCATCCAAGT  
>HPV70\_Alpha\_1173493\_nt6356\_L1\_AOS|1  
GGCACTTTTGGAAATAGAGGTGGCATGGTGGGCGACACAATACCTTCAGAGTTATATATTA  
>HPV71\_Alpha\_12084981\_nt6854\_L1\_AOS|1  
CCATCTGTGCTACCAAACTGTTGAGTCTACATATAAAGCCTCTAGTTTCATGGAATATT  
>HPV71\_Alpha\_12084981\_nt6847\_L1\_AOS|1  
AATATGTCCATCTGTGCTACCAAACTGTTGAGTCTACATATAAAGCCTCTAGTTTCATG  
>HPV71\_Alpha\_12084981\_nt6652\_L1\_AOS|1  
TTAAAGGTTACCTTCTACCTTTTCGTGCTTCCCTACAAGCTCTCTTTATGCATCCACAC  
>HPV71\_Alpha\_12084981\_nt6363\_L1\_AOS|1  
TGGCGCTTCAGCTGCCGCTGGTAGTTGCCCCCACTTGAACCTGCCAGTACTGTTATACA  
>HPV71\_Alpha\_12084981\_nt6356\_L1\_AOS|1  
CATGCAGTGGCGCTTCAGCTGCCGCTGGTAGTTGCCCCCACTTGAACCTGCCAGTACTG  
>HPV107\_Beta\_126131393\_nt7242\_L1\_AOS|1  
TGCCTCTCGAAAACGTGCAGCGCCGACCACCAAATCGGTTGCAAAGCATAGCAAACGAAA  
>HPV107\_Beta\_126131393\_nt7235\_L1\_AOS|1

CACTACCTGCCTCTCGAAAACGTGCAGCGCCGACCACCAAATCGGTTGCAAAGCATAGCA  
>HPV107\_Beta\_126131393\_nt7228\_L1\_AOS|1  
CAAACAACACTACCTGCCTCTCGAAAACGTGCAGCGCCGACCACCAAATCGGTTGCAAAG  
>HPV107\_Beta\_126131393\_nt7221\_L1\_AOS|2  
CCTATTCCAAACAACACTACCTGCCTCTCGAAAACGTGCAGCGCCGACCACCAAATCGGT  
>HPV107\_Beta\_126131393\_nt7214\_L1\_AOS|1  
GTAAATTCTTATTCCAAACAACACTACCTGCCTCTCGAAAACGTGCAGCGCCGACCACCA  
>HPV107\_Beta\_126131393\_nt6639\_L1\_AOS|1  
AGCACCTAAGAGTGGACAATCCCAAAGTCCCTTTGGGTAATTCTATTTACTATCCCACCGT  
>HPV107\_Beta\_126131393\_nt6617\_L1\_AOS|1  
ATCAAGATCACAAATACTATATAGCACCTAAGAGTGGACAATCCCAAAGTCCCTTTGGGTA  
>HPV107\_Beta\_126131393\_nt6610\_L1\_AOS|1  
ACAATAATCAAGATCACAAATACTATATAGCACCTAAGAGTGGACAATCCCAAAGTCCCT  
>HPV107\_Beta\_126131393\_nt6603\_L1\_AOS|2  
TGATACAACAATAATCAAGATCACAAATACTATATAGCACCTAAGAGTGGACAATCCCA  
>HPV107\_Beta\_126131393\_nt6596\_L1\_AOS|1  
CTATACCTGATACAACAATAATCAAGATCACAAATACTATATAGCACCTAAGAGTGGAC  
>HPV84\_Alpha\_12958167\_nt6476\_L1\_AOS|1  
GTGAGGAGGTGCCTCAGTCTTTTACCTTAAGGGGACCTCCTCCCGGCAACCCCTTAGCA  
>HPVcand87\_Alpha\_14475578\_nt5598\_L1\_AOS|1  
ATTGATCATTTCCATGGCCCCGTCCCCACGCCCTTTGTTCCCTGTGGTTCCTAGCACTGCC  
>HPVcand87\_Alpha\_14475578\_nt5614\_L1\_AOS|1  
CCCCGTCCCCCAGGCCCTTTGTTCCCTGTGGTTCCTAGCACTGCCCCATATTCTGTATATA  
>HPVcand87\_Alpha\_14475578\_nt5607\_L1\_AOS|1  
TCCATGGCCCCGTCCCCCAGGCCCTTTGTTCCCTGTGGTTCCTAGCACTGCCCCATATTCT  
>HPVcand87\_Alpha\_14475578\_nt5591\_L1\_AOS|1  
TCCCGATATTGATCATTTCCATGGCCCCGTCCCCCAGGCCCTTTGTTCCCTGTGGTTCCTAG  
>HPVcand87\_Alpha\_14475578\_nt5584\_L1\_AOS|1  
ATACAGGTCCCGATATTGATCATTTCCATGGCCCCGTCCCCCAGGCCCTTTGTTCCCTGTGG  
>HPVcand87\_Alpha\_14475578\_nt5577\_L1\_AOS|1  
CCCCTATATACAGGTCCCGATATTGATCATTTCCATGGCCCCGTCCCCCAGGCCCTTTGTT  
>HPV72\_Alpha\_1491683\_nt6832\_L1\_AOS|1  
CCACAGCGTCCTCTGTATCAGAATATACAGCTTCTAATTTTCGTGAGTATCTTCGCCACA  
>HPV72\_Alpha\_1491683\_nt7247\_L1\_AOS|1  
TGCCCCACCAAGCTCTACCTCGACCCCCGCCCTACTAAACGTAAAAAGCGCAAAAAGTA  
>HPV72\_Alpha\_1491683\_nt6825\_L1\_AOS|1  
TGTACTGCCACAGCGTCCTCTGTATCAGAATATACAGCTTCTAATTTTCGTGAGTATCTT  
>HPV72\_Alpha\_1491683\_nt6815\_L1\_AOS|1  
TGTAACTATTTGTACTGCCACAGCGTCCTCTGTATCAGAATATACAGCTTCTAATTTTCG  
>HPV72\_Alpha\_1491683\_nt6597\_L1\_AOS|1  
CTACCAGCCAGTTTATATCTTAAAGGTGCCTCGGGTAGCGACAGGGTGACACCTGGTAGT  
>HPV72\_Alpha\_1491683\_nt6590\_L1\_AOS|1  
TGAGGCACTACCAGCCAGTTTATATCTTAAAGGTGCCTCGGGTAGCGACAGGGTGACACC  
>HPV73\_Alpha\_1491692\_nt6515\_L1\_AOS|1  
CTGTATGTGTAGGTACACAGGCTAGTAGCTCTACTACAACGTATGCCAACTCTAATTTTA  
>HPV73\_Alpha\_1491692\_nt6508\_L1\_AOS|1  
AATTTTCTGTATGTGTAGGTACACAGGCTAGTAGCTCTACTACAACGTATGCCAACTCT  
>HPV73\_Alpha\_1491692\_nt6010\_L1\_AOS|1  
TGTACTTCACAACTGTTAATACTGGTGATGTCCCCCACTGGAATTAAAGAACACCCCT  
>HPVcand86\_Alpha\_15741127\_nt6699\_L1\_AOS|1  
ATTAGTGCCGCTACCCAGAAGGCCTCTGAATATGACCCCTCTAAGTTTAATGAATATCTA  
>HPVcand86\_Alpha\_15741127\_nt6493\_L1\_AOS|1  
ATTTAAAGGGCTCCTCAGGCCCCCGAGGATCCCTTAGCAGTTATGTATATGCACCCACCC  
>HPV88\_Gamma\_167600365\_nt6759\_L1\_AOS|1  
CTGCCCACAAAACGTGTCAGGACAGTTGCCAATAGTTCTGTTAGAAATACTTCCAGAACA



>HPV88\_Gamma\_167600365\_nt6768\_L1\_AOS|1  
AAACGTGTCAGGACAGTTGCCAATAGTTCTGTAGAAATACTTCCAGAACAGTAAAAAGA  
>HPV88\_Gamma\_167600365\_nt6752\_L1\_AOS|1  
TGGTTTGCTGCCCACAAAACGTGTCAGGACAGTTGCCAATAGTTCTGTAGAAATACTTC  
>HPV88\_Gamma\_167600365\_nt6445\_L1\_AOS|2  
ACGAATTGGAAGCTATATTCCAGCTTTGTAGAGTTCCTTTGGAGCCTGATATTTTAGCTC  
>HPV88\_Gamma\_167600365\_nt6173\_L1\_AOS|1  
TTTTAAAATGGGATCTCATGTTTATTTCCCTACTGCTAGTGGATCACTTACTACTAGTGA  
>HPV88\_Gamma\_167600365\_nt6166\_L1\_AOS|1  
CTGTGAATTTTAAAATGGGATCTCATGTTTATTTCCCTACTGCTAGTGGATCACTTACTA  
>HPV88\_Gamma\_167600365\_nt6158\_L1\_AOS|1  
TACAAATGCTGTGAATTTTAAAATGGGATCTCATGTTTATTTCCCTACTGCTAGTGGATC  
>HPV88\_Gamma\_167600365\_nt6150\_L1\_AOS|1  
TTGCCACCTACAAATGCTGTGAATTTTAAAATGGGATCTCATGTTTATTTCCCTACTGCT  
>HPV88\_Gamma\_167600365\_nt6143\_L1\_AOS|1  
ATACTTATTGCCACCTACAAATGCTGTGAATTTTAAAATGGGATCTCATGTTTATTTCCC  
>HPV88\_Gamma\_167600365\_nt6132\_L1\_AOS|1  
GAGGGAAATAAATACTTATTGCCACCTACAAATGCTGTGAATTTTAAAATGGGATCTCAT  
>HPV110\_Beta\_186461194\_nt6515\_L1\_AOS|1  
TCATACTATTTCTTGCCAGCAAAGCAAGATCAACAACAACGCACACTAGCAAACCTCTAC  
>HPV110\_Beta\_186461194\_nt6508\_L1\_AOS|1  
ATCAAAATCATACTATTTCTTGCCAGCAAAGCAAGATCAACAACAACGCACACTAGCAA  
>HPV111\_Beta\_186461202\_nt6757\_L1\_AOS|2  
ATCAATTGTCTTTGATTCTTCAACTATGTAAAGTTTCTTTAGTTCCAGAAGTTTTATCTC  
>HPV111\_Beta\_186461202\_nt6466\_L1\_AOS|1  
ATTATCTGCCAGCACAGGGTAATCAACAACAAAACATTTTGGGTAACCTCCATTTATTATC  
>HPV111\_Beta\_186461202\_nt6445\_L1\_AOS|1  
CAGTGCAACAAAATCACAATTATTATCTGCCAGCACAGGGTAATCAACAACAAAACATTT  
>HPV111\_Beta\_186461202\_nt6436\_L1\_AOS|1  
CAGATGCAGCAGTGCAACAAAATCACAATTATTATCTGCCAGCACAGGGTAATCAACAAC  
>HPVFA75/KI88-03\_Unclassified\_206902429\_nt7084\_L1\_AOS|2  
AAATCATTAAGCGTAGCAGATCTGTTTCTCGGGGTACTGCAAAACGACGACGGACATAA  
>HPVFA75/KI88-03\_Unclassified\_206902429\_nt7075\_L1\_AOS|1  
ACCAGGGTCAAATCATTAAGCGTAGCAGATCTGTTTCTCGGGGTACTGCAAAACGACGA  
>HPVFA75/KI88-03\_Unclassified\_206902429\_nt7068\_L1\_AOS|1  
ACAGAACACCAGGGTCAAATCATTAAGCGTAGCAGATCTGTTTCTCGGGGTACTGCAAA  
>HPVFA75/KI88-03\_Unclassified\_206902429\_nt7061\_L1\_AOS|1  
CAGGATTACAGAACACCAGGGTCAAATCATTAAGCGTAGCAGATCTGTTTCTCGGGGTA  
>HPVFA75/KI88-03\_Unclassified\_206902429\_nt6902\_L1\_AOS|1  
GATTTATAAATTCCTCAGCCACTAAATGTCCAGATAAGGTTCTGCAAAAGATAGAGAGG  
>HPVFA75/KI88-03\_Unclassified\_206902429\_nt6670\_L1\_AOS|2  
ACCATTTGTGTACCTTCAGATAATGGTGCTATAACTGAGTATGATTCTAGCAAATTTAGA  
>HPVFA75/KI88-03\_Unclassified\_206902429\_nt6663\_L1\_AOS|1  
TAACTTTACCATTTGTGTACCTTCAGATAATGGTGCTATAACTGAGTATGATTCTAGCAA  
>HPVFA75/KI88-03\_Unclassified\_206902429\_nt6650\_L1\_AOS|2  
ACACTAGAAACACTAACTTTACCATTTGTGTACCTTCAGATAATGGTGCTATAACTGAGT  
>HPVFA75/KI88-03\_Unclassified\_206902429\_nt6643\_L1\_AOS|1  
GCTGATAACACTAGAAACACTAACTTTACCATTTGTGTACCTTCAGATAATGGTGCTATA  
>HPVFA75/KI88-03\_Unclassified\_206902429\_nt6397\_L1\_AOS|1  
TATTTTACCAGAGGAGGTAATGTTGGAGACGCTACTCCAGATGGAGCAAATAATCAAGAT  
>HPV91\_Alpha\_22023568\_nt5981\_L1\_AOS|2  
CAGTTCCCGTTTACTGGCTGTGGGCCACCCTTTTTTTCTTATAAAAAATAATTCTGGTAA  
>HPV91\_Alpha\_22023568\_nt5744\_L1\_AOS|1  
GTGCCATTGTACCGTCTGTTACACCTTCTGCAGTATCAATATATGGCACAGATTTTTAT  
>HPV91\_Alpha\_22023568\_nt5726\_L1\_AOS|1

CCACTTAGTGTCCCCTATGTGCCATTGTCACCGTCTGTTACACCTTCTGCAGTATCAATA  
>HPV91\_Alpha\_22023568\_nt5700\_L1\_AOS|2  
GACCTGATATTACATTTTCCTACAGTGCCACTTAGTGTCCCCTATGTGCCATTGTCACCGT  
>HPV91\_Alpha\_22023568\_nt5693\_L1\_AOS|1  
CAAGCAGGACCTGATATTACATTTTCCTACAGTGCCACTTAGTGTCCCCTATGTGCCATTG  
>HPV91\_Alpha\_22023568\_nt5683\_L1\_AOS|1  
TATATATACACAAGCAGGACCTGATATTACATTTTCCTACAGTGCCACTTAGTGTCCCCTA  
>HPV91\_Alpha\_22023568\_nt5673\_L1\_AOS|1  
CAGTACCTGATATATATACACAAGCAGGACCTGATATTACATTTTCCTACAGTGCCACTTA  
>HPV91\_Alpha\_22023568\_nt5642\_L1\_AOS|1  
AAAATTGTTAACTACAGTCCCACTTGCAACAGTACCTGATATATATACACAAGCAGGA  
>HPV91\_Alpha\_22023568\_nt5627\_L1\_AOS|1  
CTGCCTAACACAACAAAATTGTTAACTACAGTCCCACTTGCAACAGTACCTGATATA  
>HPVcand89\_Alpha\_22095322\_nt6573\_L1\_AOS|1  
AACCTTGTATATGCCTGGGTCTGCTGCTAATAACAGAAATACACTTACTAGCTATGTATA  
>HPVcand89\_Alpha\_22095322\_nt6554\_L1\_AOS|1  
TGGGTGAGGACCTGCCAAAACCTTGTATATGCCTGGGTCTGCTGCTAATAACAGAAATA  
>HPV90\_Alpha\_22138122\_nt6189\_L1\_AOS|1  
CCAATTTATATGATGTTGTGCCTGGCGATGACACCCGGGACAATCTTACTATGGACTATA  
>HPV58\_Alpha\_222386\_nt5791\_L1\_AOS|1  
TTTCCATCAAAAAGTCCCAATAACAATAAAAAAGTATTAGTTCCCAAGGTATCAGGCTTAC  
>HPV74\_Alpha\_27462483\_nt6609\_L1\_AOS|1  
TGTGTGCGCCTACTACACAATCCCCTCCTGCTGCTACATATACTAGTACAGACTACAAAC  
>HPV74\_Alpha\_27462483\_nt6109\_L1\_AOS|1  
TAATGTTACTGTAAAGCCAGGCGATTGCCCTGCATTAGAATTAATTACTAGTGTAATTCA  
>HPV74\_Alpha\_27462483\_nt6102\_L1\_AOS|1  
AATGTTCTAATGTTACTGTAAAGCCAGGCGATTGCCCTGCATTAGAATTAATTACTAGTG  
>HPV92\_Beta\_27531786\_nt7104\_L1\_AOS|1  
ATCTGTTAATGGTCTTAAAGAAGCTAGAAGCAGTTCTCAAAGAGGTACTAAACGAAAAAG  
>HPV92\_Beta\_27531786\_nt7116\_L1\_AOS|1  
TCTTAAAGAAGCTAGAAGCAGTTCTCAAAGAGGTACTAAACGAAAAAGAAAAAGTAACTA  
>HPV92\_Beta\_27531786\_nt7097\_L1\_AOS|1  
CTAATACATCTGTTAATGGTCTTAAAGAAGCTAGAAGCAGTTCTCAAAGAGGTACTAAAC  
>HPV92\_Beta\_27531786\_nt7090\_L1\_AOS|1  
GGATTAACATAATACATCTGTTAATGGTCTTAAAGAAGCTAGAAGCAGTTCTCAAAGAGGT  
>HPV92\_Beta\_27531786\_nt6709\_L1\_AOS|1  
CCTAAGGAAGGTGGTCAAATAACCGACTATGATTACAAAAGATTAGAGAATACACTAGA  
>HPV92\_Beta\_27531786\_nt6434\_L1\_AOS|1  
GTGTTGTGGGTGATACCATCCCAGATGCAGTTGTAAATGAAGACCATAACTTTATGTTAC  
>HPV92\_Beta\_27531786\_nt6427\_L1\_AOS|1  
CGCGGTGGTGTGTGGGTGATACCATCCCAGATGCAGTTGTAAATGAAGACCATAACTTT  
>HPV92\_Beta\_27531786\_nt6420\_L1\_AOS|1  
GTTTGTGCGCGGTGGTGTGTGGGTGATACCATCCCAGATGCAGTTGTAAATGAAGACCA  
>HPV75\_Beta\_2911544\_nt7203\_L1\_AOS|1  
AATTCCTTTTCAGGCAGGCTTACGAAGGGCTTCCAAGGTAACCAGAACAGCCAGTGTCC  
>HPV75\_Beta\_2911544\_nt6633\_L1\_AOS|1  
CCGCTGGGCAGGCTCAAAACACTTTGGGCAACTCTATTTATGTTCCCACGGTCAGTGGTT  
>HPV75\_Beta\_2911544\_nt6624\_L1\_AOS|1  
TACCTGCAGCCGCTGGGCAGGCTCAAAACACTTTGGGCAACTCTATTTATGTTCCCACGG  
>HPV76\_Beta\_2911551\_nt6655\_L1\_AOS|1  
CTGCAGCTGTTGGACAGGCCCAAAACACTTTGGGTAGCTCTATTTACGTGCCTACCGTTA  
>HPV76\_Beta\_2911551\_nt7242\_L1\_AOS|1  
CAAGCAGGCCTGCGACGGGCTTCCAGAGTATCCAGGACAGCCACTGTCCGCACAGCATCC  
>HPV76\_Beta\_2911551\_nt7234\_L1\_AOS|1  
TTCTGTTTCAAGCAGGCCTGCGACGGGCTTCCAGAGTATCCAGGACAGCCACTGTCCGCA

>HPV76\_Beta\_2911551\_nt6118\_L1\_AOS|1  
GTTTGGAAATAGGTCGCGGACAACCCCTAGGAGTAGGGTCTACAGGTCATCCCCTATTTA  
>HPV77\_Alpha\_2911558\_nt6602\_L1\_AOS|1  
CCAGAATCTTTGTACCTCAAAGGGAGTAGCGGGCGTGAGACTCCCGGCAGTGCTATATAC  
>HPV77\_Alpha\_2911558\_nt7240\_L1\_AOS|1  
CAAACGCCGGGCGCCACCCCTCCCCAGCTTCGACCAAACGGAAGCGCTCCAAAAAGTG  
>HPV77\_Alpha\_2911558\_nt7230\_L1\_AOS|1  
TTCCCTCTCGCAAACGCCGGGCGCCACCCCTCCCCAGCTTCGACCAAACGGAAGCGCT  
>HPV77\_Alpha\_2911558\_nt7223\_L1\_AOS|1  
TCGGTGGTTCCCTCTCGCAAACGCCGGGCGCCACCCCTCCCCAGCTTCGACCAAACGG  
>HPV77\_Alpha\_2911558\_nt7214\_L1\_AOS|1  
CGACGTCGTTCCGTGGTTCCCTCTCGCAAACGCCGGGCGCCACCCCTCCCCAGCTTCG  
>HPV77\_Alpha\_2911558\_nt6587\_L1\_AOS|1  
GTTGGAGACAAAATTCCAGAATCTTTGTACCTCAAAGGGAGTAGCGGGCGTGAGACTCCC  
>HPV77\_Alpha\_2911558\_nt6579\_L1\_AOS|1  
CGGGTGATGTTGGAGACAAAATTCCAGAATCTTTGTACCTCAAAGGGAGTAGCGGGCGTG  
>HPV80\_Beta\_2911565\_nt6571\_L1\_AOS|1  
TACCAGCACAAACAGGCCAGCAACAACGTGTTTTAGCAAATTCCACATATTTTCCTACTG  
>HPV80\_Beta\_2911565\_nt6772\_L1\_AOS|1  
TCACCATAAGTGTTACTTCTGATGGTAGTACTATAACTGAATATAATACACAAAATATTA  
>HPV80\_Beta\_2911565\_nt6763\_L1\_AOS|2  
ACACTAATTTACCATAAGTGTTACTTCTGATGGTAGTACTATAACTGAATATAATACAC  
>HPV80\_Beta\_2911565\_nt6756\_L1\_AOS|1  
ACAAGAAACACTAATTTACCATAAGTGTTACTTCTGATGGTAGTACTATAACTGAATAT  
>HPV80\_Beta\_2911565\_nt6749\_L1\_AOS|1  
TGATAATACAAGAAACACTAATTTACCATAAGTGTTACTTCTGATGGTAGTACTATAAC  
>HPV80\_Beta\_2911565\_nt6562\_L1\_AOS|1  
ACTTTTATTTACCAGCACAAACAGGCCAGCAACAACGTGTTTTAGCAAATTCACATATT  
>HPVRTRX7\_Unclassified\_30315616\_nt7253\_L1\_AOS|1  
CCCGATAAAAAATCCACCAAAGGAAAAACCTGATCCTTATGAAAAATTAACATTCTGGAAT  
>HPVRTRX7\_Unclassified\_30315616\_nt6984\_L1\_AOS|1  
GTATATCTATATCTAGTGAAAATCAAGATATACAGCAAATACAATCATATGACTCACAAA  
>HPV65\_Gamma\_312100\_nt6179\_L1\_AOS|1  
CTGCTCAAGAAGGTCAGGATCAGAATACTTTAGGTCCACATATATATATAGGCACTCCTA  
>HPV65\_Gamma\_312100\_nt6172\_L1\_AOS|1  
TGGATTCCCTGCTCAAGAAGGTCAGGATCAGAATACTTTAGGTCCACATATATATATAGGC  
>HPV65\_Gamma\_312100\_nt6165\_L1\_AOS|1  
TGATTACTGGATTCCCTGCTCAAGAAGGTCAGGATCAGAATACTTTAGGTCCACATATATA  
>HPV65\_Gamma\_312100\_nt6158\_L1\_AOS|1  
TTAAAACTGATTACTGGATTCCCTGCTCAAGAAGGTCAGGATCAGAATACTTTAGGTCCAC  
>HPV65\_Gamma\_312100\_nt6151\_L1\_AOS|2  
TTCGAGGTTAAAACTGATTACTGGATTCCCTGCTCAAGAAGGTCAGGATCAGAATACTTTA  
>HPV65\_Gamma\_312100\_nt6144\_L1\_AOS|1  
AGAACCTTTCGAGGTTAAAACTGATTACTGGATTCCCTGCTCAAGAAGGTCAGGATCAGAA  
>HPV65\_Gamma\_312100\_nt5585\_L1\_AOS|1  
TGATTGATAATGGTTTCTATGATTCTGACCATGAACGTCTTGTTTGGAGACTCAGAGGAA  
>HPV65\_Gamma\_312100\_nt5576\_L1\_AOS|2  
GGTTTGCAATTGATTGATAATGGTTTCTATGATTCTGACCATGAACGTCTTGTTTGGAGAC  
>HPV67\_Alpha\_3228267\_nt6906\_L1\_AOS|1  
ACATCCCCCTCCAACAGCAAAGGAAGATCCTCTTAAAAAGTACAGTTTTTGGGAAATCAAT  
>HPV67\_Alpha\_3228267\_nt6895\_L1\_AOS|1  
CCTGTCAAAAAACATCCCCCTCCAACAGCAAAGGAAGATCCTCTTAAAAAGTACAGTTTTT  
>HPV67\_Alpha\_3228267\_nt6760\_L1\_AOS|1  
CCCTTACTGCAAATGTTATGCAATACATACACCATGAATCCAGATATATTAGAGGACT  
>HPV67\_Alpha\_3228267\_nt6753\_L1\_AOS|1

AAAATATCCCTTACTGCAAATGTTATGCAATACATACACACCATGAATCCAGATATATTA  
>HPV67\_Alpha\_3228267\_nt6745\_L1\_AOS|1  
AGCTGTGCAAAATATCCCTTACTGCAAATGTTATGCAATACATACACACCATGAATCCAG  
>HPV67\_Alpha\_3228267\_nt6738\_L1\_AOS|1  
ATATTTTCAGCTGTGCAAAATATCCCTTACTGCAAATGTTATGCAATACATACACACCATG  
>HPV67\_Alpha\_3228267\_nt6437\_L1\_AOS|1  
AGATTTGTATTTTAAGGGATCTGCAAACACTTCTGCACTGCAAACCTCAGCTTTTTTTTCC  
>HPV67\_Alpha\_3228267\_nt5754\_L1\_AOS|1  
CATCCTTACTTTTCCATTCCCTAATCCCTCCAACACTAAAAAGGTGTTAGTGCCCAAGGTG  
>HPV11\_Alpha\_333026\_nt7176\_L1\_AOS|2  
GATATCGAGGACGGACGTCTGCTCGTACAGGTATAAAGCGCCCAGCTGTGTCTAAGCCCT  
>HPV11\_Alpha\_333026\_nt7193\_L1\_AOS|1  
TCTGCTCGTACAGGTATAAAGCGCCCAGCTGTGTCTAAGCCCTCTACAGCCCCCAAACGA  
>HPV11\_Alpha\_333026\_nt7186\_L1\_AOS|1  
ACGGACGTCTGCTCGTACAGGTATAAAGCGCCCAGCTGTGTCTAAGCCCTCTACAGCCCC  
>HPV11\_Alpha\_333026\_nt6787\_L1\_AOS|1  
GACACTATGTGCATCTGTGTCTAAATCTGTCTACATACTAATTCAGATTATAAGGAATA  
>HPV31\_Alpha\_333048\_nt6981\_L1\_AOS|1  
CACGTCCATAAATTTAAAGCAGGTAAACGTAGTGCACCCTCAGCATCTACCACTACACCAG  
>HPV31\_Alpha\_333048\_nt6974\_L1\_AOS|1  
TATAGGGCACGTCCTAAATTTAAAGCAGGTAAACGTAGTGCACCCTCAGCATCTACCACT  
>HPV31\_Alpha\_333048\_nt6967\_L1\_AOS|2  
GGCAGGATATAGGGCACGTCCTAAATTTAAAGCAGGTAAACGTAGTGCACCCTCAGCATC  
>HPV33\_Alpha\_333049\_nt7012\_L1\_AOS|1  
TAAAGCAAAACCTAAACTTAAACGTGCAGCCCCACATCCACCCGCACATCGTCTGCAAA  
>HPV35\_Alpha\_333050\_nt6970\_L1\_AOS|1  
GCCGTAAATTTTTGTTACAAGCAGGACTAAAGGCCAGGCCTAATTTTAGATTAGGCAGGC  
>HPV35\_Alpha\_333050\_nt6992\_L1\_AOS|1  
AGGACTAAAGGCCAGGCCTAATTTTAGATTAGGCAGGCGTGCAGCTCCAGCATCTACATC  
>HPV35\_Alpha\_333050\_nt6982\_L1\_AOS|1  
TGTTACAAGCAGGACTAAAGGCCAGGCCTAATTTTAGATTAGGCAGGCGTGCAGCTCCAG  
>HPV35\_Alpha\_333050\_nt6963\_L1\_AOS|1  
CCGTTGGGCCGTAAATTTTTGTTACAAGCAGGACTAAAGGCCAGGCCTAATTTTAGATTA  
>HPV35\_Alpha\_333050\_nt5966\_L1\_AOS|1  
TCTTAATAAATATGTTGGTAACTCTGGTAACTCTGGTACAGATAACAGGGAATGCATTTT  
>HPV35\_Alpha\_333050\_nt5957\_L1\_AOS|1  
TACTGAAAATCTTAATAAATATGTTGGTAACTCTGGTAACTCTGGTACAGATAACAGGGA  
>HPV35\_Alpha\_333050\_nt5714\_L1\_AOS|1  
CCCATACTATGCTATTAAAAACAAGATTCTAATAAAATAGCAGTACCCAAGGTATCTGG  
>HPV47\_Beta\_333062\_nt6949\_L1\_AOS|1  
TACAAATTTTCAGCATCTCTGTTTACTCTCAGGCAGGGGACATAAAGGATATACAGGATTA  
>HPV47\_Beta\_333062\_nt6964\_L1\_AOS|1  
CTCTGTTTACTCTCAGGCAGGGGACATAAAGGATATACAGGATTATAATGCAGACAATTT  
>HPV47\_Beta\_333062\_nt6956\_L1\_AOS|1  
TTCAGCATCTCTGTTTACTCTCAGGCAGGGGACATAAAGGATATACAGGATTATAATGCA  
>HPV42\_Alpha\_333211\_nt6618\_L1\_AOS|1  
CTGGCGCAATTGGTGAACCTGTACCTGATGAACTGTATACCAAGGCTGCTAATAATGCAT  
>HPV42\_Alpha\_333211\_nt7265\_L1\_AOS|1  
CCTAAACTGTCTGTAGGTAAACGAAAGGCGTCTACAGCTAAATCTGTTTCTTCAGCTAAA  
>HPV42\_Alpha\_333211\_nt6645\_L1\_AOS|1  
ATGAACTGTATACCAAGGCTGCTAATAATGCATCTGGCAGACATAATTTAGGTAGTAGTA  
>HPV42\_Alpha\_333211\_nt6638\_L1\_AOS|1  
GTACCTGATGAACTGTATACCAAGGCTGCTAATAATGCATCTGGCAGACATAATTTAGGT  
>HPV39\_Alpha\_333245\_nt7078\_L1\_AOS|2  
CTATAGGTCCCCGAAAGCGGCCTGCTGCATCCACTTCCTCGTCCTCAGCTACTAAACACA

>HPV39\_Alpha\_333245\_nt7071\_L1\_AOS|1  
CGCCCTACTATAGGTCCCCGAAAGCGGCCTGCTGCATCCACTTCCTCGTCCTCAGCTACT  
>HPV39\_Alpha\_333245\_nt7063\_L1\_AOS|1  
TCCGCAGGCGCCCTACTATAGGTCCCCGAAAGCGGCCTGCTGCATCCACTTCCTCGTCCT  
>HPV39\_Alpha\_333245\_nt6856\_L1\_AOS|1  
CTGTAGCTCCTCCACCATCTGCCAGTTTGGTAGACACTTACAGATACCTACAGTCTGCAG  
>HPV39\_Alpha\_333245\_nt6658\_L1\_AOS|2  
CCAACTTTACATTATCTACCTCTATAGAGTCTTCCATACCTTCTACATATGATCCTTCTA  
>HPV39\_Alpha\_333245\_nt6455\_L1\_AOS|1  
TGCCCCAATTGTATATTAAGGGCACAGATATACGTGCAAACCCCGGTAGTTCTGTATACTG  
>HPV39\_Alpha\_333245\_nt6448\_L1\_AOS|2  
CCATTCTGCCCAATTGTATATTAAGGGCACAGATATACGTGCAAACCCCGGTAGTTCTG  
>HPV39\_Alpha\_333245\_nt6441\_L1\_AOS|2  
GGTGACGCCATTCTGCCCAATTGTATATTAAGGGCACAGATATACGTGCAAACCCCGGT  
>HPV39\_Alpha\_333245\_nt6433\_L1\_AOS|1  
GTATGGTGGGTGACGCCATTCTGCCCAATTGTATATTAAGGGCACAGATATACGTGCAA  
>HPV39\_Alpha\_333245\_nt6426\_L1\_AOS|1  
CGTGGTGGTATGGTGGGTGACGCCATTCTGCCCAATTGTATATTAAGGGCACAGATATA  
>HPV93\_Beta\_37089393\_nt7102\_L1\_AOS|1  
ATCAGGCAAATCTTGTACAATCACCAGCTAAACGGTCATCATCTATTTCTCGAGGAACTA  
>HPV93\_Beta\_37089393\_nt6942\_L1\_AOS|1  
ACTTATCGATATATTAATAGTTTGTAGCTACACCATGTCCCGATAAGGTTCCACCAAAGGAA  
>HPV93\_Beta\_37089393\_nt6935\_L1\_AOS|2  
ACAGAGTACTTATCGATATATTAATAGTTTGTAGCTACACCATGTCCCGATAAGGTTCCACC  
>HPV93\_Beta\_37089393\_nt6928\_L1\_AOS|1  
ATCCGTTACAGAGTACTTATCGATATATTAATAGTTTGTAGCTACACCATGTCCCGATAAGG  
>HPV93\_Beta\_37089393\_nt6921\_L1\_AOS|2  
CCAGACAATCCGTTACAGAGTACTTATCGATATATTAATAGTTTGTAGCTACACCATGTCCC  
>HPV93\_Beta\_37089393\_nt6158\_L1\_AOS|1  
TGCACCTAAATGTGATGGAGCCAATGACCAAAATGGGATTTGCCACCTATACAATTAGT  
>HPV93\_Beta\_37089393\_nt6151\_L1\_AOS|1  
GGGATGTTGCACCTAAATGTGATGGAGCCAATGACCAAAATGGGATTTGCCACCTATAC  
>HPV12\_Beta\_396910\_nt6897\_L1\_AOS|1  
ACCAATTTTCTAGTATATCTATTTACAGTGATAATCAAAATGTACACGACATTCCAAATTAT  
>HPV12\_Beta\_396910\_nt6373\_L1\_AOS|1  
ATGCACCAGCTGAAAATGGTGTGTTGCCCTCCCATAGAGTTAAAGAACACTTTCATTGAAG  
>HPV14D\_Beta\_396918\_nt6445\_L1\_AOS|1  
TAGCCTAAAGAATGTTTATTACATTCCACCAATGACAAATCAACCACAAAACAATATTGG  
>HPV14D\_Beta\_396918\_nt6672\_L1\_AOS|1  
GTATATCAGTTAGTTCAGAAAACACTGAGGTATCCAAAATTGACAATTATACCTCTCAGA  
>HPV14D\_Beta\_396918\_nt6458\_L1\_AOS|1  
GTTTATTACATTCCACCAATGACAAATCAACCACAAAACAATATTGGCAATGCCATGTAT  
>HPV14D\_Beta\_396918\_nt5997\_L1\_AOS|1  
ATCCCAACTCATACAGGCAACAAGCTAACTCCACTGATGACAGACAAAATGTGTCATTTG  
>HPV14D\_Beta\_396918\_nt5982\_L1\_AOS|1  
TTGGTGATACAGAAAATCCCAACTCATACAGGCAACAAGCTAACTCCACTGATGACAGAC  
>HPV15\_Beta\_396924\_nt6558\_L1\_AOS|1  
CCAGCACAATCAACCCAACAACAAAATAACTTAGCAAATTCTACTTACTTTCCACAGTT  
>HPV15\_Beta\_396924\_nt6547\_L1\_AOS|1  
ATTTTTTATTACCAGCACAAATCAACCCAACAACAAAATAACTTAGCAAATTCTACTTACT  
>HPV17\_Beta\_396932\_nt6751\_L1\_AOS|1  
TAGCTGACAACACTAGGAACACAAATTTTTCTATTAGCGTGTCTACAGAAGCTGGGGCTG  
>HPV17\_Beta\_396932\_nt6581\_L1\_AOS|2  
AGCTCAAACTGGCCAACAACAGCGCACTTTGGGTAATTCCACTTATTTTCCAACTGTAAG  
>HPV17\_Beta\_396932\_nt6574\_L1\_AOS|1

ATTTACCAGCTCAAACCTGGCCAACAACAGCGCACTTTGGGTAATTCCACTTATTTTCCAA  
>HPV17\_Beta\_396932\_nt6565\_L1\_AOS|1  
ACAAATTTTATTTACCAGCTCAAACCTGGCCAACAACAGCGCACTTTGGGTAATTCCACTT  
>HPV17\_Beta\_396932\_nt6558\_L1\_AOS|1  
CAGGATCACAAATTTTATTTACCAGCTCAAACCTGGCCAACAACAGCGCACTTTGGGTAAT  
>HPV17\_Beta\_396932\_nt6070\_L1\_AOS|1  
TAGGCACTACAGGACATCCCTTGTTTAATAAGTTAAGAGACACTGAAAATAACAGTAGCT  
>HPV19\_Beta\_396940\_nt6704\_L1\_AOS|2  
AAAAATACATACTACATACCTCCTAACAAATAGTCAGCAACAATATACTAATTTAGGAAAT  
>HPV25\_Beta\_396948\_nt7158\_L1\_AOS|1  
GTTCTGACACCGGACAATTCTATTTCAGGATACTTATCGCTACATTGATTCTTTAGCCACA  
>HPV25\_Beta\_396948\_nt7147\_L1\_AOS|1  
AATTAGGATTCGTTCTGACACCGGACAATTCTATTTCAGGATACTTATCGCTACATTGATT  
>HPV25\_Beta\_396948\_nt7061\_L1\_AOS|2  
AATATTACAACCTTTGCAAAGTACCGTTGAAGGCAGAAATATTGGCTCAGATTAATGCAAT  
>HPV25\_Beta\_396948\_nt7054\_L1\_AOS|2  
TATCATTAATATTACAACCTTTGCAAAGTACCGTTGAAGGCAGAAATATTGGCTCAGATTA  
>HPV25\_Beta\_396948\_nt7047\_L1\_AOS|1  
TATGAGTTATCATTAATATTACAACCTTTGCAAAGTACCGTTGAAGGCAGAAATATTGGCT  
>HPV25\_Beta\_396948\_nt6737\_L1\_AOS|1  
TGCATTTTACATACCACCTAACAGTAGTCAGGCTCAATATAATAATCTAGGTAACCTCAAT  
>HPV27\_Alpha\_396964\_nt5524\_L1\_AOS|1  
CTGCCTCCTCTGCATCTACACTGCGAGGGTCCACTACAGCCCCCTCTCTCGGGTGGTGTG  
>HPV27\_Alpha\_396964\_nt5669\_L1\_AOS|1  
ATCCTCTGTTTACATATTTGGGGGGGATTATTATTTACTGCCAAGTTATATCCTGTGGCC  
>HPV27\_Alpha\_396964\_nt5641\_L1\_AOS|1  
CCCTCATTCCTGTGGCTCCATCGTTGCCATCCTCTGTTTACATATTTGGGGGGGATTATT  
>HPV27\_Alpha\_396964\_nt5632\_L1\_AOS|1  
GTTTGGGGCCCCCTCATTCCTGTGGCTCCATCGTTGCCATCCTCTGTTTACATATTTGGGG  
>HPV27\_Alpha\_396964\_nt5624\_L1\_AOS|1  
TGTTCTCGGTTTGGGGCCCCCTCATTCCTGTGGCTCCATCGTTGCCATCCTCTGTTTACAT  
>HPV27\_Alpha\_396964\_nt5608\_L1\_AOS|1  
ATATTGAACCACCCGTTGTTCTGTTTGGGGCCCCCTCATTCCTGTGGCTCCATCGTTGC  
>HPV27\_Alpha\_396964\_nt5595\_L1\_AOS|1  
TATACTGGGCCTGATATTGAACCACCCGTTGTTCTGTTTGGGGCCCCCTCATTCCTGTG  
>HPV27\_Alpha\_396964\_nt5581\_L1\_AOS|1  
TTGATGTGCCTGTGTATACTGGGCCTGATATTGAACCACCCGTTGTTCTGTTTGGGGC  
>HPV27\_Alpha\_396964\_nt5560\_L1\_AOS|1  
CAGCCCCCTCTCTCGGGTGGTGTGATGTGCCTGTGTATACTGGGCCTGATATTGAACCAC  
>HPV27\_Alpha\_396964\_nt5510\_L1\_AOS|1  
TAATACCACGGTATCTGCCTCCTCTGCATCTACACTGCGAGGGTCCACTACAGCCCCCTCT  
>HPV30\_Alpha\_396973\_nt7098\_L1\_AOS|2  
AAACGCTCGGCCCCCAGTTCCTCTACCTCTACACCATCAGCCAAACGCAAGCGGCGGTGA  
>HPV30\_Alpha\_396973\_nt7090\_L1\_AOS|1  
CTACTAAAAAACGCTCGGCCCCCAGTTCCTCTACCTCTACACCATCAGCCAAACGCAAGC  
>HPV30\_Alpha\_396973\_nt7082\_L1\_AOS|1  
TTCTACTACTACTAAAAAACGCTCGGCCCCCAGTTCCTCTACCTCTACACCATCAGCCAA  
>HPV30\_Alpha\_396973\_nt7075\_L1\_AOS|1  
CTAAACCTTCTACTACTACTAAAAAACGCTCGGCCCCCAGTTCCTCTACCTCTACACCAT  
>HPV30\_Alpha\_396973\_nt7066\_L1\_AOS|1  
GGGTTCTGTACTAAACCTTCTACTACTACTAAAAAACGCTCGGCCCCCAGTTCCTCTACCT  
>HPV30\_Alpha\_396973\_nt6841\_L1\_AOS|1  
TACTTGAGGGCTGGAATATTGGATTGTACCCCCAGCTGCCACAAGCTTAGAGGACAAAT  
>HPV30\_Alpha\_396973\_nt6833\_L1\_AOS|1  
CTCCACTTTACTTGAGGGCTGGAATATTGGATTGTACCCCCAGCTGCCACAAGCTTAGA

>HPV30\_Alpha\_396973\_nt6826\_L1\_AOS|2  
CTATGAACTCCACTTTACTTTGAGGGCTGGAATATTGGATTGTCACCCCCAGCTGCCACAA  
>HPV30\_Alpha\_396973\_nt6819\_L1\_AOS|1  
TTACATACTATGAACTCCACTTTACTTTGAGGGCTGGAATATTGGATTGTCACCCCCAGCT  
>HPV30\_Alpha\_396973\_nt6655\_L1\_AOS|1  
ACACCACTAGGAACACAAACATGACTATATCTGCAACCACACAAACGTTATCCACATATA  
>HPV3\_Alpha\_397005\_nt7029\_L1\_AOS|1  
ATTACCTGCCAGAAAGATGCACCTCCCACTGAGAAGCAAGACCCCTACGCCAAACTAAAC  
>HPV3\_Alpha\_397005\_nt7178\_L1\_AOS|1  
TACCCGCTCTAGTATATCTGTTTCGTAAACGCTCGGCGACAACCACATCTAGAACAGCTGC  
>HPV3\_Alpha\_397005\_nt7154\_L1\_AOS|1  
ATTTCTCATGCAGCTCGGTGTAGGTACCCGCTCTAGTATATCTGTTTCGTAAACGCTCGGC  
>HPV3\_Alpha\_397005\_nt7147\_L1\_AOS|1  
GCAGGAAATTTCTCATGCAGCTCGGTGTAGGTACCCGCTCTAGTATATCTGTTTCGTAAAC  
>HPV3\_Alpha\_397005\_nt6772\_L1\_AOS|1  
GTACTAATATGACATTGTGTGTTTCTACTGAAACCTCGGCTACATATGATGCTACTAAAT  
>HPV3\_Alpha\_397005\_nt6523\_L1\_AOS|1  
ATTTTCTTAACAGAGCTGGTATGGCTGGAGACACCGTGCCTGACGCGTTGTACATTAAAG  
>HPV40\_Alpha\_397014\_nt6569\_L1\_AOS|2  
CTACTGGTGATAGTGTCCCAACTGACTTATATATAACAGGTACATCTGGTCGGACTCCTA  
>HPV45\_Alpha\_397022\_nt7077\_L1\_AOS|1  
TGCTGCTTCCACGTCTACTGCATCTACTGCATCTAGGCCTGCCAAACGTGTACGTATACG  
>HPV45\_Alpha\_397022\_nt7089\_L1\_AOS|1  
GTCTACTGCATCTACTGCATCTAGGCCTGCCAAACGTGTACGTATACGTAGTAAGAAATA  
>HPV45\_Alpha\_397022\_nt7070\_L1\_AOS|1  
AGCGTCTTGCTGCTTCCACGTCTACTGCATCTACTGCATCTAGGCCTGCCAAACGTGTAC  
>HPV52\_Alpha\_397038\_nt6462\_L1\_AOS|1  
GTGCCAGGTGATTTATATATACAAGGGTCTAACTCTGGCAATACTGCCACTGTACAAAGC  
>HPV52\_Alpha\_397038\_nt6455\_L1\_AOS|1  
TGACCCTGTGCCAGGTGATTTATATATACAAGGGTCTAACTCTGGCAATACTGCCACTGT  
>HPV52\_Alpha\_397038\_nt6448\_L1\_AOS|1  
CCTTAGGTGACCCTGTGCCAGGTGATTTATATATACAAGGGTCTAACTCTGGCAATACTG  
>HPV52\_Alpha\_397038\_nt6441\_L1\_AOS|1  
GCCGGTACCTTAGGTGACCCTGTGCCAGGTGATTTATATATACAAGGGTCTAACTCTGGC  
>HPV56\_Alpha\_397053\_nt6120\_L1\_AOS|1  
AGTCCACACAAGTTACCACAGGGGACTGCCCGCCTCTTGCAATTAATTAACACCTATAG  
>HPV56\_Alpha\_397053\_nt7010\_L1\_AOS|1  
ACTAGGTCAAAGCCTGCTGTAGCTACCTCTAAAAAGCGATCTGCTCCTACCTCCACCTCT  
>HPV56\_Alpha\_397053\_nt7002\_L1\_AOS|2  
AACTGGGCACTAGGTCAAAGCCTGCTGTAGCTACCTCTAAAAAGCGATCTGCTCCTACCT  
>HPV56\_Alpha\_397053\_nt6626\_L1\_AOS|1  
AGTACTGCTACAGAACAGTTAAGTAAATATGATGCACGAAAAATTAATCAGTACCTTAGA  
>HPV56\_Alpha\_397053\_nt6409\_L1\_AOS|1  
TGCAGAGTTATATTTAAAGGGTAGCAATGGTAGAGAACCCCTCCGAGTTCTGTATATGT  
>HPV56\_Alpha\_397053\_nt6387\_L1\_AOS|2  
GTAAAGTTGGGGAAACAATACCTGCAGAGTTATATTTAAAGGGTAGCAATGGTAGAGAAC  
>HPV56\_Alpha\_397053\_nt6108\_L1\_AOS|1  
GTGCTGTGTGTAAGTCCACACAAGTTACCACAGGGGACTGCCCCGCTCTTGCAATTAATTA  
>HPV56\_Alpha\_397053\_nt5509\_L1\_AOS|1  
GTATATATACAGGGATCCTCCTTTGCATTATGGCCTGTGTATTTTTTTTAGACGTAGGCGC  
>HPV56\_Alpha\_397053\_nt5502\_L1\_AOS|1  
CCATGATGTATATATACAGGGATCCTCCTTTGCATTATGGCCTGTGTATTTTTTTTAGACG  
>HPV56\_Alpha\_397053\_nt5495\_L1\_AOS|1  
ATGTTACCCATGATGTATATATACAGGGATCCTCCTTTGCATTATGGCCTGTGTATTTTT  
>HPVcand62\_Alpha\_39932599\_nt6590\_L1\_AOS|1

ACTGACCTGTATATGAAAGGTACCCCAGGCAGTGACAGACAAATGCCGGGCAGTTACATT  
>HPVcand62\_Alpha\_39932599\_nt6583\_L1\_AOS|1  
CCTGCCCCTGACCTGTATATGAAAGGTACCCCAGGCAGTGACAGACAAATGCCGGGCAG  
>HPV43\_Alpha\_40804474\_nt6971\_L1\_AOS|1  
GTCCCCACCTGCCCTCTGCTTCTTTGGAAGATACTTATCGCTTTTTGTCTAACAAGGCCAT  
>HPV43\_Alpha\_40804474\_nt6541\_L1\_AOS|2  
CTGGTAAACTGGCGACGTTGTGCCTTCCGATATGTATATTGCTGGCTCTAATACCAGGT  
>HPV81\_Alpha\_40804509\_nt6384\_L1\_AOS|2  
CTAATGTTGCTCCAGCACAAAACGAATGCCCCCCTTGGAGTTTAAAAATACAACCATTC  
>HPV81\_Alpha\_40804509\_nt6359\_L1\_AOS|2  
CACTGGGCCCCGGGTACCTTTTGTGCTAATGTTGCTCCAGCACAAAACGAATGCCCCC  
>HPV95\_Gamma\_40804520\_nt6821\_L1\_AOS|1  
TAATAAATGGATCTCGTAAAAGACAAAGAGCTATTACTTCTCAAACAGGCACAA  
>HPV95\_Gamma\_40804520\_nt6812\_L1\_AOS|1  
AGAGTGGATTAATAAATGGATCTCGTAAAAGACAAAGAGCTATTACTTCTCAAACAGGCACAA  
>HPV95\_Gamma\_40804520\_nt6650\_L1\_AOS|1  
AATACAGATTCAATTACATCCAGAGCTACTCGTTGTCCAACCTCAAATCCACCAGCAGAAA  
>HPV95\_Gamma\_40804520\_nt6232\_L1\_AOS|1  
AACCAAGAACAAAATAATCTTGGCCCTCACATTTATTTTGGAACTCCTAGCGTTCTCTT  
>HPV95\_Gamma\_40804520\_nt6224\_L1\_AOS|1  
CTCAGAGTAACCAAGAACAAAATAATCTTGGCCCTCACATTTATTTTGGAACTCCTAGCG  
>HPV95\_Gamma\_40804520\_nt6217\_L1\_AOS|1  
ATTGCTGCTCAGAGTAACCAAGAACAAAATAATCTTGGCCCTCACATTTATTTTGGAACT  
>HPV95\_Gamma\_40804520\_nt6210\_L1\_AOS|1  
TTACATAATTGCTGCTCAGAGTAACCAAGAACAAAATAATCTTGGCCCTCACATTTATTT  
>HPV95\_Gamma\_40804520\_nt6203\_L1\_AOS|1  
AGTCTGATTACATAATTGCTGCTCAGAGTAACCAAGAACAAAATAATCTTGGCCCTCACA  
>HPV95\_Gamma\_40804520\_nt6196\_L1\_AOS|1  
GAAGTGAAGTCTGATTACATAATTGCTGCTCAGAGTAACCAAGAACAAAATAATCTTGGC  
>HPV94\_Alpha\_40804528\_nt6559\_L1\_AOS|1  
AGAGCCAGTGCAGTGGGAGACACCATTCTGACACTCTAATATTGAAGTCGGCCGGTGGT  
>HPV94\_Alpha\_40804528\_nt6552\_L1\_AOS|1  
TTTCAATAGAGCCAGTGCAGTGGGAGACACCATTCTGACACTCTAATATTGAAGTCGGC  
>HPVcand85\_Alpha\_4574720\_nt5995\_L1\_AOS|2  
CAGAAAATTCCCATGTTGCTACTTCTGTAGTTACACACGACACTAGAGATAATGTGTCAG  
>HPV96\_Beta\_50253426\_nt7334\_L1\_AOS|1  
AGGGGTTACTGTAACCGGGAGGGCTACAACCTCAAGAGGTACAAAACGAAAACGACGCTG  
>HPV96\_Beta\_50253426\_nt7326\_L1\_AOS|1  
GTTAACAGAGGGGTTACTGTAACCGGGAGGGCTACAACCTCAAGAGGTACAAAACGAAAA  
>HPV96\_Beta\_50253426\_nt7319\_L1\_AOS|1  
CAAAAGAGTTAACAGAGGGGTTACTGTAACCGGGAGGGCTACAACCTCAAGAGGTACAAA  
>HPV96\_Beta\_50253426\_nt7312\_L1\_AOS|1  
TGCAAAACAAAAGAGTTAACAGAGGGGTTACTGTAACCGGGAGGGCTACAACCTCAAGAG  
>HPV96\_Beta\_50253426\_nt7303\_L1\_AOS|1  
AAGCCAACCTGCAAAACAAAAGAGTTAACAGAGGGGTTACTGTAACCGGGAGGGCTACAA  
>HPV96\_Beta\_50253426\_nt6751\_L1\_AOS|2  
GTTCCATTTACTCTCCACAGTCAGTGGATCTTTAGTTTCTACAGATGCACAGATTTTCA  
>HPV96\_Beta\_50253426\_nt6714\_L1\_AOS|1  
AAGGCTGCCAGTGATCAAAACAGAGATACAATGGCAAGTTCCATTTACTCTCCACAGTC  
>HPV96\_Beta\_50253426\_nt6707\_L1\_AOS|1  
TTATTTAAAGGCTGCCAGTGATCAAAACAGAGATACAATGGCAAGTTCCATTTACTCTCC  
>HPV96\_Beta\_50253426\_nt6700\_L1\_AOS|1  
ACCATTATTATTTAAAGGCTGCCAGTGATCAAAACAGAGATACAATGGCAAGTTCCATTT  
>HPV96\_Beta\_50253426\_nt6693\_L1\_AOS|1  
GAAGACAACCATTATTATTTAAAGGCTGCCAGTGATCAAAACAGAGATACAATGGCAAGT



>HPV83\_Alpha\_5059324\_nt6567\_L1\_AOS|2  
TATATTCCAGGCACATCTGCTAATAGTAGGAACACTCTTACCAGCTACATCTATGCTCCT  
>HPV83\_Alpha\_5059324\_nt6560\_L1\_AOS|1  
CTCTTATTATATTCCAGGCACATCTGCTAATAGTAGGAACACTCTTACCAGCTACATCTA  
>HPV83\_Alpha\_5059324\_nt6553\_L1\_AOS|1  
TGCCTACCTCTTATTATATTCCAGGCACATCTGCTAATAGTAGGAACACTCTTACCAGCT  
>HPV83\_Alpha\_5059324\_nt6546\_L1\_AOS|1  
GAGGTGCTGCCTACCTCTTATTATATTCCAGGCACATCTGCTAATAGTAGGAACACTCTT  
>HPV59\_Alpha\_557236\_nt7071\_L1\_AOS|2  
CTGCCCCCTACCTCTACCCCATCACCAAAACGTGTTAAGCGTCGCAAGTCTTCCAGAAAAT  
>HPV59\_Alpha\_557236\_nt7064\_L1\_AOS|1  
GCAGCGCCTGCCCCCTACCTCTACCCCATCACCAAAACGTGTTAAGCGTCGCAAGTCTTCC  
>HPV59\_Alpha\_557236\_nt7057\_L1\_AOS|1  
CAAACGTGCAGCGCCTGCCCCCTACCTCTACCCCATCACCAAAACGTGTTAAGCGTCGCAA  
>HPV59\_Alpha\_557236\_nt6901\_L1\_AOS|3  
CACCGCACCGCCAGTTAAACAGGACCCTTATGACAAACTAAAGTTTTGGCCTGTAGATCT  
>HPV59\_Alpha\_557236\_nt6643\_L1\_AOS|1  
TTCTACTACTTCTTCTATTCTAATGTATACACACCTACCAGTTTTAAAGAATATGCCAG  
>HPV59\_Alpha\_557236\_nt6634\_L1\_AOS|1  
TGTGTGTGCTTCTACTACTTCTTCTATTCTAATGTATACACACCTACCAGTTTTAAAGA  
>HPV59\_Alpha\_557236\_nt6627\_L1\_AOS|1  
ATCTTTCTGTGTGTGCTTCTACTACTTCTTCTATTCTAATGTATACACACCTACCAGTT  
>HPV59\_Alpha\_557236\_nt6620\_L1\_AOS|1  
AGCACCAATCTTTCTGTGTGTGCTTCTACTACTTCTTCTATTCTAATGTATACACACCT  
>HPV6\_Alpha\_6002612\_nt7207\_L1\_AOS|1  
CCTCTATTTCGTACCGGTGTTAAGCGCCCTGCTGTTTCCAAAGCCTCTGCTGCCCTAAAC  
>HPV6\_Alpha\_6002612\_nt7232\_L1\_AOS|1  
CCCTGCTGTTTCCAAAGCCTCTGCTGCCCTAAACGTAAGCGCGCCAAAACCAAAGGTA  
>HPV6\_Alpha\_6002612\_nt7223\_L1\_AOS|1  
TGTTAAGCGCCCTGCTGTTTCCAAAGCCTCTGCTGCCCTAAACGTAAGCGCGCCAAAAC  
>HPV6\_Alpha\_6002612\_nt7216\_L1\_AOS|1  
GTACCGGTGTTAAGCGCCCTGCTGTTTCCAAAGCCTCTGCTGCCCTAAACGTAAGCGCG  
>HPV6\_Alpha\_6002612\_nt7200\_L1\_AOS|1  
GGACGGTCCCTCTATTTCGTACCGGTGTTAAGCGCCCTGCTGTTTCCAAAGCCTCTGCTGCC  
>HPV6\_Alpha\_6002612\_nt7193\_L1\_AOS|1  
ATATAGGGGACGGTCCCTCTATTTCGTACCGGTGTTAAGCGCCCTGCTGTTTCCAAAGCCTC  
>HPV57\_Alpha\_60882\_nt6984\_L1\_AOS|1  
ACCTACAGGTATTTGCAATCCCAAGCGATAACATGTCAGAAGCCCACACCCCCTAAGACC  
>HPV57\_Alpha\_60882\_nt6977\_L1\_AOS|1  
GCAGGACACCTACAGGTATTTGCAATCCCAAGCGATAACATGTCAGAAGCCCACACCCCC  
>HPV57\_Alpha\_60882\_nt6970\_L1\_AOS|1  
CCAGCCTGCAGGACACCTACAGGTATTTGCAATCCCAAGCGATAACATGTCAGAAGCCCA  
>HPV57\_Alpha\_60882\_nt6952\_L1\_AOS|1  
TCCCCCACCCTCGTCCGCGAGCCTGCAGGACACCTACAGGTATTTGCAATCCCAAGCGA  
>HPV57\_Alpha\_60882\_nt6540\_L1\_AOS|1  
ATGGGTGACGCCCTCCCGGATGAGCTATATGTCAAGAGTTCTACCGTCCAGACCCCCGGT  
>HPV57\_Alpha\_60882\_nt6370\_L1\_AOS|1  
TTGCGCTCTACAGTCCAACAAATCAGATGTCCCCTTGATATCTGTACTAACATATGTA  
>HPV69\_Alpha\_6970418\_nt6371\_L1\_AOS|2  
TAAAGGCGCTGGTCAAGGTGCTGAACCTCCAACCTTCTATATACTCACGTACGCCTAG  
>HPV82\_Alpha\_6970427\_nt6610\_L1\_AOS|1  
CTGTTACTCCATCTGTTGCACAAACATTTACTCCAGCAAACCTTTAAGCAGTACATTAGGC  
>HPV82\_Alpha\_6970427\_nt6589\_L1\_AOS|1  
CCAATTTAACCATTAGCACTGCTGTTACTCCATCTGTTGCACAAACATTTACTCCAGCAA  
>HPV82\_Alpha\_6970427\_nt6341\_L1\_AOS|3

GCATTACTATAATAAGGCTGGTGTGGTTGGTGATGCCATTCCAGACAAGGCTTATATTAA  
>HPV68a\_Alpha\_71726685\_nt6284\_L1\_AOS|1  
TGGTAGGGGACACTATTCCCACTGACATGTATATTAAGGGCACTGACATTCGTGAAACTC  
>HPV68a\_Alpha\_71726685\_nt6512\_L1\_AOS|1  
TTACATTGTCCACTACTACAGACTCTACTGTACCAGCTGTGTATGATTCTAATAAATTTA  
>HPV68a\_Alpha\_71726685\_nt6277\_L1\_AOS|1  
GGAGGCATGGTAGGGGACACTATTCCCACTGACATGTATATTAAGGGCACTGACATTCGT  
>HPV97\_Alpha\_71726694\_nt6956\_L1\_AOS|1  
CCCCGTCTGCCCCCTACTACTTCCAAACCTGCTAAGCGTTTACGTGTCCGTCGTAAAAAAT  
>HPV97\_Alpha\_71726694\_nt6530\_L1\_AOS|1  
CTTCTACACAAAATGGCGTAGCTACCACATATGACCCTACAAAATATAAACAGTATAGTA  
>HPV97\_Alpha\_71726694\_nt6522\_L1\_AOS|1  
ACTGTGTGCTTCTACACAAAATGGCGTAGCTACCACATATGACCCTACAAAATATAAACA  
>HPV106\_Alpha\_71726710\_nt6586\_L1\_AOS|1  
GGGGAGGATGTTCCGGAAGGGTTTTTACTAAAGGGGCCTACTACTACATCCCGCGCCTCT  
>HPV106\_Alpha\_71726710\_nt5690\_L1\_AOS|1  
CGATGTGCTTGTGCACGGGTCTACATATTATTTATTGCCCTCATATGTGTTGCTTCCTAG  
>HPV106\_Alpha\_71726710\_nt5678\_L1\_AOS|1  
TCACCCACAGGCGATGTGCTTGTGCACGGGTCTACATATTATTTATTGCCCTCATATGT  
>HPV106\_Alpha\_71726710\_nt5671\_L1\_AOS|1  
CTCCTGGTCACCCACAGGCGATGTGCTTGTGCACGGGTCTACATATTATTTATTGCCCT  
>HPV106\_Alpha\_71726710\_nt5664\_L1\_AOS|2  
CCTACCCCTCCTGGTCACCCACAGGCGATGTGCTTGTGCACGGGTCTACATATTATTTA  
>HPV106\_Alpha\_71726710\_nt5656\_L1\_AOS|1  
CCGTGCCCCCTACCCCTCCTGGTCACCCACAGGCGATGTGCTTGTGCACGGGTCTACAT  
>HPV106\_Alpha\_71726710\_nt5620\_L1\_AOS|1  
CTGACAGTGCTCTTCCCGATTCCCACTGCTTGGCCCGTGCCCCCTACCCCTCCTGGTC  
>HPV106\_Alpha\_71726710\_nt5613\_L1\_AOS|1  
AGTGGCCCTGACAGTGCTCTTCCCGATTCCCACTGCTTGGCCCGTGCCCCCTACCCCT  
>HPV106\_Alpha\_71726710\_nt5605\_L1\_AOS|1  
CTGTTTTTAGTGCCCTGACAGTGCTCTTCCCGATTCCCACTGCTTGGCCCGTGCCCC  
>HPV102\_Alpha\_71726718\_nt5682\_L1\_AOS|1  
GTTCCCTTCCCAATCTGTGTTTGTGGATGGTACAGACTATTTTTTATTGCCTAATTACTTA  
>HPV102\_Alpha\_71726718\_nt5673\_L1\_AOS|1  
TCCTCTAATGTTCCCTTCCCAATCTGTGTTTGTGGATGGTACAGACTATTTTTTATTGCCT  
>HPV102\_Alpha\_71726718\_nt5525\_L1\_AOS|1  
ATCTACAAATATTTTCAGCTACATCTGTGGTCTCTGCGCGGTATGACAATGTCACAGTACC  
>HPV102\_Alpha\_71726718\_nt5518\_L1\_AOS|2  
CTTTGCAATCTACAAATATTTTCAGCTACATCTGTGGTCTCTGCGCGGTATGACAATGTCA  
>HPV102\_Alpha\_71726718\_nt5511\_L1\_AOS|1  
TCTGTTCCCTTTGCAATCTACAAATATTTTCAGCTACATCTGTGGTCTCTGCGCGGTATGAC  
>HPV102\_Alpha\_71726718\_nt5493\_L1\_AOS|2  
TCATATACTTCTTCCACGTCTGTTCCCTTTGCAATCTACAAATATTTTCAGCTACATCTGTG  
>HPV102\_Alpha\_71726718\_nt5482\_L1\_AOS|1  
CTCCACATGTTTCATATACTTCTTCCACGTCTGTTCCCTTTGCAATCTACAAATATTTTCAG  
>HPV102\_Alpha\_71726718\_nt5475\_L1\_AOS|1  
TTGGCGTCTCCACATGTTTCATATACTTCTTCCACGTCTGTTCCCTTTGCAATCTACAAAT  
>HPV102\_Alpha\_71726718\_nt5447\_L1\_AOS|1  
TTATGCTGATAATGGCCACTTGGACTCCTTGGCGTCTCCACATGTTTCATATACTTCTTC  
>HPV13\_Alpha\_85827580\_nt5868\_L1\_AOS|1  
GCAGTGGGAAATCCTTATTTTCTATTAAAGAAACAAAACAAACTGTTGTCCCTAAGGTA  
>HPV13\_Alpha\_85827580\_nt7147\_L1\_AOS|2  
TTCAGTCTAGGTCACCTATTCGTGTAGGTAGAAAACGTGCTGCATCTACATCTACTGCCA  
>HPV13\_Alpha\_85827580\_nt7140\_L1\_AOS|1  
ACAGGCGTTCAGTCTAGGTCACCTATTCGTGTAGGTAGAAAACGTGCTGCATCTACATCT

>HPV13\_Alpha\_85827580\_nt7133\_L1\_AOS|1  
ATTACAAACAGGCGTTCAGTCTAGGTCACCTATTCGTGTAGGTAGAAAACGTGCTGCATC  
>HPV13\_Alpha\_85827580\_nt6758\_L1\_AOS|1  
TGCAGCCACTACATCATCTCTTTCAGACACATATAAGGCCACAGAATATAAACAGTACAT  
>HPV13\_Alpha\_85827580\_nt6751\_L1\_AOS|1  
CTGTGTGTGCAGCCACTACATCATCTCTTTCAGACACATATAAGGCCACAGAATATAAAC  
>HPV13\_Alpha\_85827580\_nt6508\_L1\_AOS|1  
ATTTCTTTAACAGGGCAGGCTCTGTTGGTGAACCTAATCCCAGCAGAATTATATGTTAAGG  
>HPV2\_Alpha\_9626032\_nt7210\_L1\_AOS|1  
GCAAGCGCGCCGCTGTTTCGGGGACCACGCCGCCACTAGTAAACGAAAACGGGTAAGGC  
>HPV2\_Alpha\_9626032\_nt6787\_L1\_AOS|1  
GTAGCACTAATGTATCTCTGTGTGCCACTGAGGCGTCTGATACTAATTATAAGGCTACCA  
>HPV41\_Nu\_9626041\_nt6790\_L1\_AOS|1  
TGTCACCTTCACCTCCCAATTCTGTACTGGAGGATCATTATAGGTACATACTGTCCATTGC  
>HPV41\_Nu\_9626041\_nt6775\_L1\_AOS|1  
AGACTGGCATTTAGCTGTCACTTCACCTCCCAATTCTGTACTGGAGGATCATTATAGGTA  
>HPV41\_Nu\_9626041\_nt6768\_L1\_AOS|1  
TTATTGAAGACTGGCATTTAGCTGTCACTTCACCTCCCAATTCTGTACTGGAGGATCATT  
>HPV41\_Nu\_9626041\_nt6662\_L1\_AOS|1  
TTTTTAAAGGCACACCGAGGAGTTTCAGCTTGCCCTTTATTCTACAGCTGTGTAAGGTAGAC  
>HPV41\_Nu\_9626041\_nt6287\_L1\_AOS|1  
TATGGAGACCACATGTTTTTCTATGTGCGCGTGAAGCTCTGTATGCTAGGCATATAATG  
>HPV41\_Nu\_9626041\_nt5779\_L1\_AOS|1  
TCCCAATACCTTTGCATTTTGTGATAAGTCCCTTTTTTAACCCTGACAAGGAGCGTCTGGT  
>HPV41\_Nu\_9626041\_nt5772\_L1\_AOS|1  
TCCCAATACCTTTGCATTTTGTGATAAGTCCCTTTTTTAACCCTGACAAGGAGC  
>HPV41\_Nu\_9626041\_nt5694\_L1\_AOS|1  
ACAATATTACTAATGCGGATGGCAAAGAGGTGGTCCCTAAAGTTTCTCTAATCAGTTCA  
>HPV1\_Mu\_9626063\_nt6713\_L1\_AOS|2  
AATGTCCAGAACAGGCGCCTCCTGAGCCCCAGACTGATCCTTATAGTCAATATAAATTCT  
>HPV1\_Mu\_9626063\_nt6706\_L1\_AOS|1  
GCAGCAAAATGTCCAGAACAGGCGCCTCCTGAGCCCCAGACTGATCCTTATAGTCAATAT  
>HPV1\_Mu\_9626063\_nt6233\_L1\_AOS|1  
AGGAGGCAGTCCCACAAAGCCTGTATTTAACAGCAGATGCTGAACCAAGAACAACCTTAG  
>HPV1\_Mu\_9626063\_nt6226\_L1\_AOS|1  
GGTGATAAGGAGGCAGTCCCACAAAGCCTGTATTTAACAGCAGATGCTGAACCAAGAACA  
>HPV1\_Mu\_9626063\_nt6219\_L1\_AOS|1  
TTCCGTGGGTGATAAGGAGGCAGTCCCACAAAGCCTGTATTTAACAGCAGATGCTGAACC  
>HPV1\_Mu\_9626063\_nt6203\_L1\_AOS|2  
TTTTTACTCGCGGGGTTCGGTGGGTGATAAGGAGGCAGTCCCACAAAGCCTGTATTTAA  
>HPV1\_Mu\_9626063\_nt5440\_L1\_AOS|1  
TGGTTACCAGCGCAGAATAAGTTCTATCTTCTCCCCAGCCCATCACTAGAATCCTGTCC  
>HPV18\_Alpha\_9626069\_nt6649\_L1\_AOS|1  
CTTCTACACAGTCTCCTGTACCTGGGCAATATGATGCTACCAAATTTAAGCAGTATAGCA  
>HPV18\_Alpha\_9626069\_nt5455\_L1\_AOS|1  
TATTACATTACCATCTACTACCTCTGTATGGCCCATTGTATCACCCACGGCCCCCTGCCTC  
>HPV18\_Alpha\_9626069\_nt5448\_L1\_AOS|1  
GTCCTGATATTACATTACCATCTACTACCTCTGTATGGCCCATTGTATCACCCACGGCCC  
>HPV18\_Alpha\_9626069\_nt5441\_L1\_AOS|2  
TACACGGGTCTGATATTACATTACCATCTACTACCTCTGTATGGCCCATTGTATCACCC  
>HPV18\_Alpha\_9626069\_nt5434\_L1\_AOS|1  
GCCTGTATACACGGGTCTGATATTACATTACCATCTACTACCTCTGTATGGCCCATTGT  
>HPV4\_Gamma\_9626597\_nt6396\_L1\_AOS|1  
TTACAATTTCTGTGAAGTCAGATGGTGCTAATGACAATTATCAGTATAAAGCTAGTGATT  
>HPV4\_Gamma\_9626597\_nt6420\_L1\_AOS|2

GTGCTAATGACAATTATCAGTATAAAGCTAGTGATTTTAAACAGTACCTCAGACATATAG  
>HPV4\_Gamma\_9626597\_nt6413\_L1\_AOS|1  
TCAGATGGTGCTAATGACAATTATCAGTATAAAGCTAGTGATTTTAAACAGTACCTCAGA  
>HPV4\_Gamma\_9626597\_nt6406\_L1\_AOS|1  
TGTGAAGTCAGATGGTGCTAATGACAATTATCAGTATAAAGCTAGTGATTTTAAACAGTA  
>HPV4\_Gamma\_9626597\_nt6200\_L1\_AOS|2  
GCTCAAAACCAACAAGATCAGTACACTTTAGGACCTCATATTTATGTAGGGACCCCTAGT  
>HPV63\_Mu\_9626605\_nt6567\_L1\_AOS|1  
GGATCCAACAATTATCGATTCCCTGGCAGTTAACAGTTTCTCAACCTCCTGCAAATGCTAT  
>HPV63\_Mu\_9626605\_nt6560\_L1\_AOS|1  
ATAATATGGATCCAACAATTATCGATTCCCTGGCAGTTAACAGTTTCTCAACCTCCTGCAA  
>HPV63\_Mu\_9626605\_nt6425\_L1\_AOS|1  
TTAACAAAGCAACCCCTGAGACTTATGATAGCGCAGATTATAATGAGTATACTCGCCATG  
>HPV63\_Mu\_9626605\_nt6417\_L1\_AOS|1  
AAATGTTCTTAACAAAGCAACCCCTGAGACTTATGATAGCGCAGATTATAATGAGTATAC  
>HPV63\_Mu\_9626605\_nt6410\_L1\_AOS|1  
TGAATATAAATGTTCTTAACAAAGCAACCCCTGAGACTTATGATAGCGCAGATTATAATG  
>HPV63\_Mu\_9626605\_nt6403\_L1\_AOS|1  
ACCACGATGAATATAAATGTTCTTAACAAAGCAACCCCTGAGACTTATGATAGCGCAGAT  
>HPV63\_Mu\_9626605\_nt6396\_L1\_AOS|1  
CAGAGGAACCACGATGAATATAAATGTTCTTAACAAAGCAACCCCTGAGACTTATGATAG  
>HPV63\_Mu\_9626605\_nt6206\_L1\_AOS|2  
ATATTGCTGCTAAAGCCGAGCAACCCCAAAATACTATTGCTACAGATAATTATTTTGTAG  
>HPV63\_Mu\_9626605\_nt6169\_L1\_AOS|1  
ATTGTTAGTGAAAAAGAGAAAGTCCCTACCAGTGCATATATTGCTGCTAAAGCCGAGCAA  
>HPV63\_Mu\_9626605\_nt6162\_L1\_AOS|1  
TGCTGGAATTGTTAGTGAAAAAGAGAAAGTCCCTACCAGTGCATATATTGCTGCTAAAGC  
>HPV16\_Alpha\_9627100\_nt7066\_L1\_AOS|1  
AACCAAAATTTACATTAGGAAAACGAAAAGCTACACCCACCACCTCATCTACCTCTACAA  
>HPV16\_Alpha\_9627100\_nt7059\_L1\_AOS|1  
AAGGCCAAACCAAATTTACATTAGGAAAACGAAAAGCTACACCCACCACCTCATCTACC  
>HPV16\_Alpha\_9627100\_nt6455\_L1\_AOS|1  
CGATTTTATACATTAAAGGCTCTGGGTCTACTGCAAATTTAGCCAGTTCAAATTATTTTCC  
>HPV16\_Alpha\_9627100\_nt6448\_L1\_AOS|1  
TACCAGACGATTTATACATTAAAGGCTCTGGGTCTACTGCAAATTTAGCCAGTTCAAATT  
>HPV16\_Alpha\_9627100\_nt6441\_L1\_AOS|2  
GAAAATGTACCAGACGATTTATACATTAAAGGCTCTGGGTCTACTGCAAATTTAGCCAGT  
>HPV16\_Alpha\_9627100\_nt6434\_L1\_AOS|2  
TGTTGGTGAAAATGTACCAGACGATTTATACATTAAAGGCTCTGGGTCTACTGCAAATTT  
>HPV5\_Beta\_9627145\_nt6972\_L1\_AOS|2  
TAATTTTCAGTATTTCTGTATATAATCAGGCTGGAGCACTAAAAGATGTTGCAGACTATAA  
>HPV5\_Beta\_9627145\_nt6989\_L1\_AOS|1  
TATATAATCAGGCTGGAGCACTAAAAGATGTTGCAGACTATAATGCAGATCAATTTAGAG  
>HPV5\_Beta\_9627145\_nt6981\_L1\_AOS|2  
TATTTCTGTATATAATCAGGCTGGAGCACTAAAAGATGTTGCAGACTATAATGCAGATCA  
>HPV5\_Beta\_9627145\_nt6965\_L1\_AOS|1  
GAAATACTAATTTTCAGTATTTCTGTATATAATCAGGCTGGAGCACTAAAAGATGTTGCAG  
>HPV5\_Beta\_9627145\_nt6740\_L1\_AOS|1  
AAATTGACAATGGTACATACAAAATCAGTTTTTACATTCCAGGGGCTGATGGCCAAGCTC  
>HPV5\_Beta\_9627145\_nt6731\_L1\_AOS|1  
CACGTGCACAAATTGACAATGGTACATACAAAATCAGTTTTTACATTCCAGGGGCTGATG  
>HPV5\_Beta\_9627145\_nt6533\_L1\_AOS|1  
GGAACATGAATTTTAAAGGCACTTCAAGATAGTAGATCAGATGTCAGTTTACATCGTCA  
>HPV5\_Beta\_9627145\_nt6520\_L1\_AOS|1  
GACATAGGTTTTGGGAACATGAATTTTAAAGGCACTTCAAGATAGTAGATCAGATGTCAGT

>HPV5\_Beta\_9627145\_nt6513\_L1\_AOS|1  
TATGGCAGACATAGGTTTTGGGAACATGAATTTTAAGGCACTTCAAGATAGTAGATCAGA  
>HPV5\_Beta\_9627145\_nt6057\_L1\_AOS|1  
TCATCCTTATTTC AATGTATACAATATTAATGGTGATAAGCTTGAGGTCCTAAGGTTTC  
>HPV26\_Alpha\_9627305\_nt6112\_L1\_AOS|1  
AAATACACAGACACAACGTGGGGATTGCCCCCCTTAGAATTAATTTCCAGCATTATTGA  
>HPV32\_Alpha\_9627327\_nt6673\_L1\_AOS|1  
GTTCTGAGGACATGTATATAAAAGCTTCTAATGGTGCTTCTGGCAGAAATAATTTAGCT  
>HPV32\_Alpha\_9627327\_nt7323\_L1\_AOS|1  
AACAGCATCTTCCAGTCAAAAGTCTTCTTCTCCTGCAAAACGCAGAAAAACACGTAAATA  
>HPV32\_Alpha\_9627327\_nt7316\_L1\_AOS|1  
TAAACGAACAGCATCTTCCAGTCAAAAGTCTTCTTCTCCTGCAAAACGCAGAAAAACAC  
>HPV32\_Alpha\_9627327\_nt7309\_L1\_AOS|1  
ACAGCAGTAAACGAACAGCATCTTCCAGTCAAAAGTCTTCTTCTCCTGCAAAACGCAGA  
>HPV32\_Alpha\_9627327\_nt7302\_L1\_AOS|2  
TAAACTTACAGCAGTAAACGAACAGCATCTTCCAGTCAAAAGTCTTCTTCTCCTGCAAA  
>HPV32\_Alpha\_9627327\_nt6656\_L1\_AOS|1  
GAACCCTTGGTGAACCTGTTCTGAGGACATGTATATAAAAGCTTCTAATGGTGCTTCTG  
>HPV34\_Alpha\_9627334\_nt6019\_L1\_AOS|1  
GCACACCATGTGGTACCCAAAATGCTGGGGAATGTCCTCCGCTTGAATTAAAGAACACCA  
>HPV34\_Alpha\_9627334\_nt6930\_L1\_AOS|1  
GCCCCCTAGGTTACAGGCCTCTAAACGGTCTGCACCTTCATCATCTAGTACAGCACCT  
>HPV34\_Alpha\_9627334\_nt6526\_L1\_AOS|1  
CAGTTTGTGTAGGTACACAATCCACAAGTACAAGTGCACCATATGCAAAACAGTAATTTTA  
>HPV34\_Alpha\_9627334\_nt6519\_L1\_AOS|1  
AACTTTTTCAGTTTGTGTAGGTACACAATCCACAAGTACAAGTGCACCATATGCAAAACAGT  
>HPV34\_Alpha\_9627334\_nt6512\_L1\_AOS|1  
AAGCACAACTTTTTCAGTTTGTGTAGGTACACAATCCACAAGTACAAGTGCACCATATGC  
>HPV49\_Beta\_9627363\_nt7264\_L1\_AOS|1  
TACAACGGGCTTCTAGAGTGTCTAAATCCTCTGCTGCTAGAGCTTCCACACGGGGTATTA  
>HPV49\_Beta\_9627363\_nt6871\_L1\_AOS|1  
TTAGTGTAAGTACGGATGGCCAGACACCTACAGAATATGACAGTACCAAGGTTAGAGAAT  
>HPV49\_Beta\_9627363\_nt6657\_L1\_AOS|1  
TACATATTACCTGCAGCAAGTCAACAGGCCCAAATACTCTTGGCAGCTCCATCTATTTTC  
>HPV53\_Alpha\_9627377\_nt7072\_L1\_AOS|1  
CTAAACCGCCTGTATCCTCTAAAAACGCTCTGCTTCTACTACATCTACCTCAGCCCCCT  
>HPV7\_Alpha\_9627389\_nt6169\_L1\_AOS|1  
TGAAGATGTGGAAACTCGTCTGTATATGGAACAGTACCTGGTCAGGACAGCAGAGAAAA  
>HPV7\_Alpha\_9627389\_nt6833\_L1\_AOS|1  
ACACAATCGCCACACCAACACCATATGACAATAGTAAGTTTAAAGAATATTTACGTCAT  
>HPV7\_Alpha\_9627389\_nt6594\_L1\_AOS|1  
GAGACAGTGTCCAAATGATTTATATATAACAGGTTTCATCTAATCGCGCTTCTATTGCAG  
>HPV7\_Alpha\_9627389\_nt6587\_L1\_AOS|1  
ACTACTGGAGACAGTGTCCAAATGATTTATATATAACAGGTTTCATCTAATCGCGCTTCT  
>HPV7\_Alpha\_9627389\_nt6162\_L1\_AOS|1  
ATAAAGATGAAGATGTGGAAACTCGTCTGTATATGGAACAGTACCTGGTCAGGACAGCA  
>HPV9\_Beta\_9627396\_nt6611\_L1\_AOS|1  
TGATCAACAACAACGAACAATAGCTAATTCCACCTACTATCCTACAGTAAGTGGGTCATT  
>HPV9\_Beta\_9627396\_nt6886\_L1\_AOS|1  
ATCAGATTTCAATTAATCTTACAGTTGTGTAAAGTGCCTTTAGTAGCTGAAGTATTATCCC  
>HPV9\_Beta\_9627396\_nt6604\_L1\_AOS|1  
CAAAAAGTGATCAACAACAACGAACAATAGCTAATTCCACCTACTATCCTACAGTAAGTG  
>HPV9\_Beta\_9627396\_nt6597\_L1\_AOS|1  
TTGCCAGCAAAAAGTGATCAACAACAACGAACAATAGCTAATTCCACCTACTATCCTACA  
>HPV9\_Beta\_9627396\_nt6590\_L1\_AOS|1

TTTCTTTTGGCCAGCAAAAAGTGATCAACAACAACGAACAATAGCTAATTCACCTACTA  
>HPV9\_Beta\_9627396\_nt6574\_L1\_AOS|1  
TAAACCAGGATCATAATTTCTTTTGGCCAGCAAAAAGTGATCAACAACAACGAACAATAG  
>HPV54\_Alpha\_9628437\_nt6631\_L1\_AOS|1  
GCTACAGCATCCACGCAGGATAGCTTTAATAATTCTGACTTTAGGGAGTATATTAGACAT  
>HPV54\_Alpha\_9628437\_nt7047\_L1\_AOS|1  
GCGTGCAGCCCCCTTCCTCCTCTAAGGGTACAGCGCGCAAGCGTGCTAAAACTAAAAGGTA  
>HPV54\_Alpha\_9628437\_nt7004\_L1\_AOS|1  
TACAGGCTGGCCTACGTGCACGTCCGCGCCTTCGGCCTGTAAAGCGTGTCAGCCCCCTTCCT  
>HPV54\_Alpha\_9628437\_nt6623\_L1\_AOS|1  
CATTGTGTGCTACAGCATCCACGCAGGATAGCTTTAATAATTCTGACTTTAGGGAGTATA  
>HPV54\_Alpha\_9628437\_nt6616\_L1\_AOS|1  
AACCTAACATTGTGTGCTACAGCATCCACGCAGGATAGCTTTAATAATTCTGACTTTAGG  
>HPV54\_Alpha\_9628437\_nt6420\_L1\_AOS|1  
TGACTTATACATTAAGAAATCCTCAGGTAACCTTGACAGTTCTATTTATGCTGCAACTCC  
>HPV24\_Unclassified\_9628486\_nt6249\_L1\_AOS|1  
TGATAATAATGATGCTGGTAGATGTCCACCTATTAAGTTAGTAAATTCAGTAATTCAAGA  
>HPV24\_Unclassified\_9628486\_nt6800\_L1\_AOS|1  
AAAATGGCAAAGTAACAGATATTAACGAGTATGATGCTAATAAATTTAGGGAATATCAGA  
>HPV24\_Unclassified\_9628486\_nt6785\_L1\_AOS|1  
TAAGTGTATACACTGAAAATGGCAAAGTAACAGATATTAACGAGTATGATGCTAATAAAT  
>HPV24\_Unclassified\_9628486\_nt6242\_L1\_AOS|1  
GTGCTGGTGATAATAATGATGCTGGTAGATGTCCACCTATTAAGTTAGTAAATTCAGTAA  
>HPV24\_Unclassified\_9628486\_nt6235\_L1\_AOS|1  
GAGAGGTGTGCTGGTGATAATAATGATGCTGGTAGATGTCCACCTATTAAGTTAGTAAAT  
>HPV24\_Unclassified\_9628486\_nt6228\_L1\_AOS|1  
AGTAGCTGAGAGGTGTGCTGGTGATAATAATGATGCTGGTAGATGTCCACCTATTAAGTT  
>HPV24\_Unclassified\_9628486\_nt6221\_L1\_AOS|1  
ATTGGGAAGTAGCTGAGAGGTGTGCTGGTGATAATAATGATGCTGGTAGATGTCCACCTA  
>HPV48\_Gamma\_9628542\_nt6558\_L1\_AOS|1  
CCATACAAAGCTTACAGTTTCTGGACTTTAGATATGACAGAGCGCTTCTCGTCTGATTTA  
>HPV48\_Gamma\_9628542\_nt6653\_L1\_AOS|1  
AACTGGTTTGTAAATGGTAAACGAGCTAGAACAGACTATACAGCTGCAGGATCTAGTAC  
>HPV48\_Gamma\_9628542\_nt6550\_L1\_AOS|1  
ACACAGATCCATACAAAGCTTACAGTTTCTGGACTTTAGATATGACAGAGCGCTTCTCGT  
>HPV48\_Gamma\_9628542\_nt6543\_L1\_AOS|1  
GAAGAAGACACAGATCCATACAAAGCTTACAGTTTCTGGACTTTAGATATGACAGAGCGC  
>HPV48\_Gamma\_9628542\_nt6535\_L1\_AOS|1  
CTGAACCAGAAGAAGACACAGATCCATACAAAGCTTACAGTTTCTGGACTTTAGATATGA  
>HPV48\_Gamma\_9628542\_nt6507\_L1\_AOS|2  
AAATCCATGGCTACTAAATGCCCTACTGCTGAACCAGAAGAAGACACAGATCCATACAAA  
>HPV48\_Gamma\_9628542\_nt6498\_L1\_AOS|1  
AGGTATATCAAATCCATGGCTACTAAATGCCCTACTGCTGAACCAGAAGAAGACACAGAT  
>HPV48\_Gamma\_9628542\_nt6026\_L1\_AOS|1  
TTATATAACTCCTGATTCTGCCGATCAAAACAACAGATCTTCTCATTTAGGATCTTCTGT  
>HPV48\_Gamma\_9628542\_nt6018\_L1\_AOS|1  
GGAGTATATTATATAACTCCTGATTCTGCCGATCAAAACAACAGATCTTCTCATTTAGGA  
>HPV48\_Gamma\_9628542\_nt5981\_L1\_AOS|2  
AGCTGGCCAAATGGGGGAGCCTATACCAACAGAAAATGGAGTATATTATATAACTCCTGA  
>HPV50\_Gamma\_9628550\_nt6294\_L1\_AOS|1  
AGAAAGATGTCAATCCTTTGGATCCTTTAAATGTAGCAAGTTCTTATATGTACTCAAAGG  
>HPV50\_Gamma\_9628550\_nt6689\_L1\_AOS|1  
TTTCAGACTGGATTATTAAAGAGAAGAGTTAGAACTGATTACACTGTTGCTACAGTTTCC  
>HPV50\_Gamma\_9628550\_nt6325\_L1\_AOS|1  
TGTAGCAAGTTCTTATATGTACTCAAAGGATGATTTTAATCAGTACAGCCGTCATACTGA

>HPV50\_Gamma\_9628550\_nt6318\_L1\_AOS|1  
CTTTAAATGTAGCAAGTTCTTATATGTACTCAAAGGATGATTTTAATCAGTACAGCCGTC  
>HPV50\_Gamma\_9628550\_nt6311\_L1\_AOS|2  
TTGGATCCTTTAAATGTAGCAAGTTCTTATATGTACTCAAAGGATGATTTTAATCAGTAC  
>HPV50\_Gamma\_9628550\_nt6287\_L1\_AOS|1  
AGTGTTAAGAAAGATGTCAATCCTTTGGATCCTTTAAATGTAGCAAGTTCTTATATGTAC  
>HPV50\_Gamma\_9628550\_nt6051\_L1\_AOS|2  
CAGGAGTTTATAATTATGCAGTAAACCCTAATCAACCAGAGCAAAATCGTAGAACCAATA  
>HPV50\_Gamma\_9628550\_nt5860\_L1\_AOS|1  
TAAACTACAACAGGACAGAGCAGGGGTCCCTTTAGATATAGTGGATTCAATCAGCTTATG  
>HPV50\_Gamma\_9628550\_nt5853\_L1\_AOS|1  
ACTTTCCTAAACTACAACAGGACAGAGCAGGGGTCCCTTTAGATATAGTGGATTCAATCA  
>HPV50\_Gamma\_9628550\_nt5734\_L1\_AOS|1  
GGATTTAGCAGAACCTTGTGACAAAAACAGCTTAAATAATGGCAAGTGTCCCTCCAATACA  
>HPV60\_Gamma\_9628566\_nt6762\_L1\_AOS|1  
GACAATAGATTTGCAAGAACGTTTTTCTAACGAATTATCCCAGTTTTCTCTTGGA AAAAG  
>HPV60\_Gamma\_9628566\_nt6226\_L1\_AOS|1  
TATTACTTAGCACCACAAACTGATAAACCTCAAATAACCTTGGTGGTTATAGTTACTTC  
>HPV60\_Gamma\_9628566\_nt6218\_L1\_AOS|1  
ATTCTGGATATTACTTAGCACCACAAACTGATAAACCTCAAATAACCTTGGTGGTTATA  
>HPV61\_Alpha\_9628574\_nt6569\_L1\_AOS|1  
GTGAGGCACTGCCTGACTCTTATTATCTTAAGGGTGCGAATGACAAGGCGGCCCTGGTA  
>HPV8\_Beta\_333074\_nt6932\_L1\_AOS\_rc|1  
GTCTCAGATATTCTCTGAACTGGGTGATTTATAGTCTGTGATGTTCTTAAGTTCCCCAT  
>HPV8\_Beta\_333074\_nt6473\_L1\_AOS\_rc|1  
ATATCTCATTTACTATGTCGAGACTTACATCAGATCTGTTCTGTTGTAAAGTCTTAAAGT  
>HPV8\_Beta\_333074\_nt6360\_L1\_AOS\_rc|1  
TTTAGTTCAATGGGTGGGCACAGACCTTGCTGTTGGTCCTCTGCACATGGAATGGCTTTT  
>HPV51\_Alpha\_333087\_nt6559\_L1\_AOS\_rc|1  
ATGCCTAATATATTGCTTAAAGTTACTTGGAGTAAATGTTGGGGAAACCGCAGCAGTGGC  
>HPV51\_Alpha\_333087\_nt6048\_L1\_AOS\_rc|1  
TCCTGAATGACAGAGGATACAAGTTCCAGGGGGGGCAGTCTCCTGGAGGTACAGGTGTG  
>HPV51\_Alpha\_333087\_nt6041\_L1\_AOS\_rc|1  
TGACAGAGGATACAAGTTCCAGGGGGGGCAGTCTCCTGGAGGTACAGGTGTGTTTTTGC  
>HPV20\_Beta\_1020162\_nt6739\_L1\_AOS\_rc|1  
CATTGAATTACCTAGGTTGTTCTGTGCCTGATTATTCACAGGTGGAATGTAGAATGCATT  
>HPV20\_Beta\_1020162\_nt6956\_L1\_AOS\_rc|1  
TCTGAGAATCATAATTTTGAATTTTAGAAACATCAGTGTTTTCTGAATGAACTGATATGC  
>HPV20\_Beta\_1020162\_nt6944\_L1\_AOS\_rc|1  
AATTTTGAATTTTAGAAACATCAGTGTTTTCTGAATGAACTGATATGCTAAAATTTGTAT  
>HPV20\_Beta\_1020162\_nt6936\_L1\_AOS\_rc|1  
ATTTTAGAAACATCAGTGTTTTCTGAATGAACTGATATGCTAAAATTTGTATTTTCGAGTA  
>HPV22\_Beta\_1020178\_nt7135\_L1\_AOS\_rc|2  
TTAAGAGGTAAGTTTCCTTCGTTTTACAGTTTTAGACGTTTTCCGCGTAGCAGAACGTTT  
>HPV22\_Beta\_1020178\_nt7128\_L1\_AOS\_rc|1  
GTAAGTTTCCTTCGTTTTACAGTTTTAGACGTTTTCCGCGTAGCAGAACGTTTCACACTG  
>HPV22\_Beta\_1020178\_nt7121\_L1\_AOS\_rc|1  
TCCTTCGTTTTACAGTTTTAGACGTTTTCCGCGTAGCAGAACGTTTCACACTGACCCTGG  
>HPV22\_Beta\_1020178\_nt7114\_L1\_AOS\_rc|1  
TTTTACAGTTTTAGACGTTTTCCGCGTAGCAGAACGTTTCACACTGACCCTGGCACTGGC  
>HPV22\_Beta\_1020178\_nt7107\_L1\_AOS\_rc|2  
GTTTTAGACGTTTTCCGCGTAGCAGAACGTTTCACACTGACCCTGGCACTGGCCCTTGCA  
>HPV23\_Beta\_1020186\_nt7100\_L1\_AOS\_rc|2  
TTTGACAGTTTTGGTCACTTTTCGAGTTGCAGGCCGTTTGGTACCGGACCGTACACGCTG  
>HPV23\_Beta\_1020186\_nt7120\_L1\_AOS\_rc|2

TACAATTGCACTTTTTTCCTTTTGACAGTTTGGTCACTTTTCGAGTTGCAGGCCGTTTG  
>HPV23\_Beta\_1020186\_nt7113\_L1\_AOS\_rc|1  
GCACTTTTTTCCTTTTGACAGTTTGGTCACTTTTCGAGTTGCAGGCCGTTTGGTACCGG  
>HPV23\_Beta\_1020186\_nt7093\_L1\_AOS\_rc|1  
GTTTTGGTCACTTTTCGAGTTGCAGGCCGTTTGGTACCGGACCGTACACGCTGCACTCCA  
>HPV23\_Beta\_1020186\_nt7086\_L1\_AOS\_rc|1  
TCACTTTTCGAGTTGCAGGCCGTTTGGTACCGGACCGTACACGCTGCACTCCAATTTGAA  
>HPV23\_Beta\_1020186\_nt6046\_L1\_AOS\_rc|1  
AATGAGATATTTCTTCTGTCATCTACAGTACCTTCCTGACGTTCACTAGAATTTTCTGCA  
>HPV28\_Alpha\_1020202\_nt6496\_L1\_AOS\_rc|1  
TTCAGGAATGGTGTCCCCAGCAACACCAGCTCTATTAAAAAATGCCGAGCGAAAAGTTG  
>HPV28\_Alpha\_1020202\_nt7188\_L1\_AOS\_rc|1  
TACTTTTTGGCGCGTTTTCGTTTTGCAGCAGACGATCCTCTCGTGGTGGACGCTGGACGT  
>HPV28\_Alpha\_1020202\_nt7181\_L1\_AOS\_rc|1  
TGGCGCGTTTTCGTTTTGCAGCAGACGATCCTCTCGTGGTGGACGCTGGACGTTTGC GAA  
>HPV28\_Alpha\_1020202\_nt6503\_L1\_AOS\_rc|1  
ACAATGTTTCAGGAATGGTGTCCCCAGCAACACCAGCTCTATTAAAAAATGCCGAGCGA  
>HPV29\_Alpha\_1020210\_nt7244\_L1\_AOS\_rc|1  
CTTTGCAGGGGTGGGGGCCGTGGTGGTTCGTCGGCGCTTTCTGGAGGGGACTACTGAACG  
>HPV29\_Alpha\_1020210\_nt7264\_L1\_AOS\_rc|1  
TACTTTTTCGAGCGTTTTTCGCTTTGCAGGGGTGGGGGCCGTGGTGGTTCGTTTCGGCGCTTT  
>HPV29\_Alpha\_1020210\_nt7257\_L1\_AOS\_rc|1  
TCGAGCGTTTTTCGCTTTGCAGGGGTGGGGGCCGTGGTGGTTCGTTTCGGCGCTTTCTGGAGG  
>HPV29\_Alpha\_1020210\_nt7237\_L1\_AOS\_rc|1  
GGGGTGGGGGCCGTGGTGGTTCGTCGGCGCTTTCTGGAGGGGACTACTGAACGCCGGCGC  
>HPV29\_Alpha\_1020210\_nt6611\_L1\_AOS\_rc|1  
AGGAGTTTCTCGCCCGTTGTTACCCTTTAAGTACAAGGAATCTGGGATTTTGTCCCCTAC  
>HPV29\_Alpha\_1020210\_nt6604\_L1\_AOS\_rc|1  
TCTCGCCCGTTGTTACCCTTTAAGTACAAGGAATCTGGGATTTTGTCCCCTACTACACCA  
>HPV29\_Alpha\_1020210\_nt6597\_L1\_AOS\_rc|1  
CGTTGTTACCCTTTAAGTACAAGGAATCTGGGATTTTGTCCCCTACTACACCAGCACGAT  
>HPV29\_Alpha\_1020210\_nt6588\_L1\_AOS\_rc|2  
CCTTTAAGTACAAGGAATCTGGGATTTTGTCCCCTACTACACCAGCACGATTAAAGAAGT  
>HPV36\_Beta\_1020218\_nt6692\_L1\_AOS\_rc|1  
AATGAAAACTGATTCTTAAAGTCCCATTTATCAATTCTGGCGTCAGGGATGTCGTCACC  
>HPV36\_Beta\_1020218\_nt6701\_L1\_AOS\_rc|1  
AGCCCCAGGAATGAAAACTGATTCTTAAAGTCCCATTTATCAATTCTGGCGTCAGGGAT  
>HPV37\_Beta\_1020226\_nt7176\_L1\_AOS\_rc|1  
GACCGTTTACGCTTTGTACCTTTAGACACTTTTACAGACGATCGAACAATTCTAGGTCTA  
>HPV37\_Beta\_1020226\_nt7162\_L1\_AOS\_rc|1  
TGTACCTTTAGACACTTTTACAGACGATCGAACAATTCTAGGTCTACTTTGCAATCCCGA  
>HPV37\_Beta\_1020226\_nt7155\_L1\_AOS\_rc|1  
TTAGACACTTTTACAGACGATCGAACAATTCTAGGTCTACTTTGCAATCCCGACTGAAAG  
>HPV37\_Beta\_1020226\_nt7147\_L1\_AOS\_rc|1  
TTTTACAGACGATCGAACAATTCTAGGTCTACTTTGCAATCCCGACTGAAAGATGAATTT  
>HPV37\_Beta\_1020226\_nt7140\_L1\_AOS\_rc|1  
GACGATCGAACAATTCTAGGTCTACTTTGCAATCCCGACTGAAAGATGAATTTCTCCCT  
>HPV37\_Beta\_1020226\_nt6528\_L1\_AOS\_rc|1  
TGGTCTGATTTGGCAGGTAAGTAATATTGTGGTCCTGATTAACAGTGCCATCGGGAATA  
>HPV37\_Beta\_1020226\_nt6225\_L1\_AOS\_rc|1  
TCAAGTGGTGGACACTGTCCTGTCTGATTATTTTCCTCTGATGCACAACTGGTGCTTTA  
>HPV38\_Beta\_1020234\_nt7123\_L1\_AOS\_rc|1  
TTTTGCGTTTTACAGATTTGGAAGATTTTCTTACTAACGGCCGTTTGACAGCACGTGTTT  
>HPV38\_Beta\_1020234\_nt7116\_L1\_AOS\_rc|2  
TTTTACAGATTTGGAAGATTTTCTTACTAACGGCCGTTTGACAGCACGTGTTTCGTGCTGT



>HPV38\_Beta\_1020234\_nt7109\_L1\_AOS\_rc|1  
GATTTGGAAGATTTTCTTACTAACGGCCGTTTGACAGCACGTGTTCTGCTGTTTGTA  
>HPV38\_Beta\_1020234\_nt6918\_L1\_AOS\_rc|1  
TGGACATTTAGTTGCTTTAGATGTTATGTAACGATATGTATCGTGACAGAATTGTCTGG  
>HPV38\_Beta\_1020234\_nt6911\_L1\_AOS\_rc|2  
TTAGTTGCTTTAGATGTTATGTAACGATATGTATCGTGACAGAATTGTCTGGGGTGGGT  
>HPV38\_Beta\_1020234\_nt6904\_L1\_AOS\_rc|1  
CTTTAGATGTTATGTAACGATATGTATCGTGACAGAATTGTCTGGGGTGGGTACAAAGC  
>HPV38\_Beta\_1020234\_nt6480\_L1\_AOS\_rc|1  
GCGTTGACCCGTGCCATTTTTTGCAGGTAAATAATAATTATGATTTTGGTTGACAGTACC  
>HPV38\_Beta\_1020234\_nt6470\_L1\_AOS\_rc|1  
TGTCATTTTTTGCAGGTAAATAATAATTATGATTTTGGTTGACAGTACCATCTGGAATA  
>HPV55\_Alpha\_1020266\_nt6709\_L1\_AOS\_rc|2  
GTTTATATTCTGTACTATTATATGTTGTAGATGGAGACTGAGTTGTAGCAGCACATATTG  
>HPV55\_Alpha\_1020266\_nt6717\_L1\_AOS\_rc|1  
CATGTATTGTTTATATTCTGTACTATTATATGTTGTAGATGGAGACTGAGTTGTAGCAGC  
>HPV55\_Alpha\_1020266\_nt6702\_L1\_AOS\_rc|1  
TTCTGTACTATTATATGTTGTAGATGGAGACTGAGTTGTAGCAGCACATATTGTCATGTT  
>HPV55\_Alpha\_1020266\_nt6498\_L1\_AOS\_rc|1  
AAAGTATATGGCATTAGGAAGTGTACTTTTAGTAGCACCTTTAAAAACCAAATCCTGTGG  
>HPV55\_Alpha\_1020266\_nt6491\_L1\_AOS\_rc|1  
ATGGCATTAGGAAGTGTACTTTTAGTAGCACCTTTAAAAACCAAATCCTGTGGAATGTCC  
>HPV55\_Alpha\_1020266\_nt6477\_L1\_AOS\_rc|1  
TGTACTTTTAGTAGCACCTTTAAAAACCAAATCCTGTGGAATGTCTCTCCAACCGTTCC  
>HPV55\_Alpha\_1020266\_nt6470\_L1\_AOS\_rc|1  
TTAGTAGCACCTTTAAAAACCAAATCCTGTGGAATGTCTCTCCAACCGTTCCCGCCCTA  
>HPV66\_Alpha\_1020290\_nt7064\_L1\_AOS\_rc|1  
AAGAGGTAGGAGCCGCCGCTTTTAGAGGCAGATACACTAGCCTTGGGTCTAGGGGGTCT  
>HPV66\_Alpha\_1020290\_nt7057\_L1\_AOS\_rc|2  
AGGAGCCGCCGCTTTTAGAGGCAGATACACTAGCCTTGGGTCTAGGGGGTCTAGGGGCC  
>HPV66\_Alpha\_1020290\_nt7050\_L1\_AOS\_rc|1  
GCCCCGCTTTTAGAGGCAGATACACTAGCCTTGGGTCTAGGGGGTCTAGGGCCTAGTTGC  
>HPV66\_Alpha\_1020290\_nt6861\_L1\_AOS\_rc|2  
GTAATAGCTGTGCTTTTAATATACCTATATTTATCCTCTAAGCTAGTTGCAACTGGTGGG  
>HPV66\_Alpha\_1020290\_nt6854\_L1\_AOS\_rc|1  
CTGTGCTTTTAATATACCTATATTTATCCTCTAAGCTAGTTGCAACTGGTGGGGATAAGC  
>HPV66\_Alpha\_1020290\_nt6847\_L1\_AOS\_rc|2  
TTTAATATACCTATATTTATCCTCTAAGCTAGTTGCAACTGGTGGGGATAAGCCAATATT  
>HPV103\_Unclassified\_109390382\_nt6381\_L1\_AOS\_rc|2  
TCTACACGAGACCGCTTTCTAGAGGAGGTAGAAGACGAGCTAACCCCAGTTTGAGATAAA  
>HPV103\_Unclassified\_109390382\_nt6212\_L1\_AOS\_rc|1  
CTGCAGCAGGGCAGCGTGTGGCTAAAGATGTTAAAAATCTGTATGTATCTCCAATAGAAG  
>HPV103\_Unclassified\_109390382\_nt6195\_L1\_AOS\_rc|2  
GTGGCTAAAGATGTTAAAAATCTGTATGTATCTCCAATAGAAGAAGGAGGCGGTGGTACA  
>HPV103\_Unclassified\_109390382\_nt5992\_L1\_AOS\_rc|1  
GGTGGCAGCATATTGCTGTGCAACGCCAGCGTCTGACTTAACATTTATTGTAAAATTTAC  
>HPV103\_Unclassified\_109390382\_nt5819\_L1\_AOS\_rc|1  
TAGAAACCAAGTGATCCACTGGGGGTTGCATAGTAAACAGACGAGGAGGCTGTATTTTGGT  
>HPV103\_Unclassified\_109390382\_nt5809\_L1\_AOS\_rc|1  
TGATCCACTGGGGGTTGCATAGTAAACAGACGAGGAGGCTGTATTTTGGTCTTTGTCAGA  
>HPV103\_Unclassified\_109390382\_nt5796\_L1\_AOS\_rc|1  
GTTGCATAGTAAACAGACGAGGAGGCTGTATTTTGGTCTTTGTCAGACGCCCCCTGTAAA  
>HPV103\_Unclassified\_109390382\_nt5738\_L1\_AOS\_rc|1  
AAATATAGGTGTGCTTAACACCCTCAAATTCAGCCTCAGGTATACTGTCGCCCATGACAC  
>HPV103\_Unclassified\_109390382\_nt5724\_L1\_AOS\_rc|1

TTAACACCCCTCAAATTCAGCCTCAGGTATACTGTCGCCCATGACACCATCCCTAGCAAAA  
>HPV101\_Unclassified\_109390389\_nt6520\_L1\_AOS\_rc|1  
AAACTTGCCCTGCGTCGGCGTTTGGGAAGACCTGGAGGTAGGCCTGGTAGGCGTAGAAGGAC  
>HPV101\_Unclassified\_109390389\_nt6193\_L1\_AOS\_rc|1  
GATTCATTAAGTGTATGTGTGCCAATACATCGGGAGTAAGAGACACTTTACAGAGCTGCA  
>HPV101\_Unclassified\_109390389\_nt6186\_L1\_AOS\_rc|1  
TAAGTGTATGTGTGCCAATACATCGGGAGTAAGAGACACTTTACAGAGCTGCACAATGAG  
>HPV101\_Unclassified\_109390389\_nt6179\_L1\_AOS\_rc|1  
ATGTGTGCCAATACATCGGGAGTAAGAGACACTTTACAGAGCTGCACAATGAGAGAAATT  
>HPV101\_Unclassified\_109390389\_nt5813\_L1\_AOS\_rc|1  
TTACCCTCAAACCCCTCCTCTGGAACACTGTCACCAACAGTGCCATTATGGGTGAAATAA  
>HPV101\_Unclassified\_109390389\_nt4975\_L1\_AOS\_rc|1  
TCTGCAAAACATTAAAAACCAGACCGTTTGCGCTTGCGTTTGCGTCTGTGACTTGGATGC  
>HPV101\_Unclassified\_109390389\_nt4968\_L1\_AOS\_rc|1  
AACATTAAAAACCAGACCGTTTGCGCTTGCGTTTGCGTCTGTGACTTGGATGCAAATAAA  
>HPV101\_Unclassified\_109390389\_nt4961\_L1\_AOS\_rc|1  
AAAACCAGACCGTTTGCGCTTGCGTTTGCGTCTGTGACTTGGATGCAAATAAAATGTATC  
>HPV101\_Unclassified\_109390389\_nt4954\_L1\_AOS\_rc|1  
GACCGTTTGCGCTTGCGTTTGCGTCTGTGACTTGGATGCAAATAAAATGTATCAAATGCA  
>HPV101\_Unclassified\_109390389\_nt4925\_L1\_AOS\_rc|1  
ACTTGGATGCAAATAAAATGTATCAAATGCATCAAACCATCCACAACAATAGGAGGTTTC  
>HPV70\_Alpha\_1173493\_nt6356\_L1\_AOS\_rc|1  
TAATATATAACTCTGAAGGTATTGTGTCGCCACCATGCCACCTCTATTCCAAAAGTGCC  
>HPV71\_Alpha\_12084981\_nt6854\_L1\_AOS\_rc|1  
AATATTCCATGAAACTAGAGGCTTTATATGTAGACTCAACAGTTTTTGGTAGCACAGATGG  
>HPV71\_Alpha\_12084981\_nt6847\_L1\_AOS\_rc|1  
CATGAAACTAGAGGCTTTATATGTAGACTCAACAGTTTTTGGTAGCACAGATGGACATATT  
>HPV71\_Alpha\_12084981\_nt6652\_L1\_AOS\_rc|1  
GTGTGGATGCATAAAGAGAGCTTGTAGGGGAAGCACGAAAGGTAGAAGGTGAACCTTTAA  
>HPV71\_Alpha\_12084981\_nt6363\_L1\_AOS\_rc|1  
TGTATAACAGTACTGGCAAGTTCAAGTGGGGGGCAACTACCAGCGGCAGCTGAAGCGCCA  
>HPV71\_Alpha\_12084981\_nt6356\_L1\_AOS\_rc|1  
CAGTACTGGCAAGTTCAAGTGGGGGGCAACTACCAGCGGCAGCTGAAGCGCCACTGCATG  
>HPV107\_Beta\_126131393\_nt7242\_L1\_AOS\_rc|1  
TTTCGTTTGCTATGCTTTGCAACCGATTGTGGTGGTCGGCGCTGCACGTTTTTCGAGAGGCA  
>HPV107\_Beta\_126131393\_nt7235\_L1\_AOS\_rc|1  
TGCTATGCTTTGCAACCGATTGTGGTGGTCGGCGCTGCACGTTTTTCGAGAGGCAGGTAGTG  
>HPV107\_Beta\_126131393\_nt7228\_L1\_AOS\_rc|1  
CTTTGCAACCGATTGTGGTGGTCGGCGCTGCACGTTTTTCGAGAGGCAGGTAGTGTGTTTG  
>HPV107\_Beta\_126131393\_nt7221\_L1\_AOS\_rc|2  
ACCGATTGTGGTGGTCGGCGCTGCACGTTTTTCGAGAGGCAGGTAGTGTGTTTGAATAGG  
>HPV107\_Beta\_126131393\_nt7214\_L1\_AOS\_rc|1  
TGGTGGTCGGCGCTGCACGTTTTTCGAGAGGCAGGTAGTGTGTTTGAATAGGAATTTAC  
>HPV107\_Beta\_126131393\_nt6639\_L1\_AOS\_rc|1  
ACGGTGGGATAGTAAATAGAATTACCCAAAGGACTTTGGGATTGTCCACTCTTAGGTGCT  
>HPV107\_Beta\_126131393\_nt6617\_L1\_AOS\_rc|1  
TACCCAAAGGACTTTGGGATTGTCCACTCTTAGGTGCTATATAGTATTTGTGATCTTGAT  
>HPV107\_Beta\_126131393\_nt6610\_L1\_AOS\_rc|1  
AGGACTTTGGGATTGTCCACTCTTAGGTGCTATATAGTATTTGTGATCTTGATTAGTTGT  
>HPV107\_Beta\_126131393\_nt6603\_L1\_AOS\_rc|2  
TGGGATTGTCCACTCTTAGGTGCTATATAGTATTTGTGATCTTGATTAGTTGTTGTATCA  
>HPV107\_Beta\_126131393\_nt6596\_L1\_AOS\_rc|1  
GTCCACTCTTAGGTGCTATATAGTATTTGTGATCTTGATTAGTTGTTGTATCAGGTATAG  
>HPV84\_Alpha\_12958167\_nt6476\_L1\_AOS\_rc|1  
TGCTAAGGGTTGCCCGGGAGGAGGTCCCCCTTAAGGTAAAAAGACTGAGGCACCTCCTCAC

>HPVcand87\_Alpha\_14475578\_nt5598\_L1\_AOS\_rc|1  
GGCAGTGCTAGGAACACAGGAACAAAGGGCGTGGGGGACGGGGCCATGGAATGATCAAT  
>HPVcand87\_Alpha\_14475578\_nt5614\_L1\_AOS\_rc|1  
TATATACAGAAATATGGGGCAGTGCTAGGAACACAGGAACAAAGGGCGTGGGGGACGGGG  
>HPVcand87\_Alpha\_14475578\_nt5607\_L1\_AOS\_rc|1  
AGAATATGGGGCAGTGCTAGGAACACAGGAACAAAGGGCGTGGGGGACGGGGCCATGGA  
>HPVcand87\_Alpha\_14475578\_nt5591\_L1\_AOS\_rc|1  
CTAGGAACACAGGAACAAAGGGCGTGGGGGACGGGGCCATGGAATGATCAATATCGGGA  
>HPVcand87\_Alpha\_14475578\_nt5584\_L1\_AOS\_rc|1  
CCACAGGAACAAAGGGCGTGGGGGACGGGGCCATGGAATGATCAATATCGGGACCTGTAT  
>HPVcand87\_Alpha\_14475578\_nt5577\_L1\_AOS\_rc|1  
AACAAAGGGCGTGGGGGACGGGGCCATGGAATGATCAATATCGGGACCTGTATATAGGGG  
>HPV72\_Alpha\_1491683\_nt6832\_L1\_AOS\_rc|1  
TGTGGCGAAGATACTCACGAAAATTAGAAGCTGTATATTCTGATACAGAGGACGCTGTGG  
>HPV72\_Alpha\_1491683\_nt7247\_L1\_AOS\_rc|1  
TACTTTTTGCGCTTTTACGTTTAGTAGGGGCGGGGTCGAGGTAGAGCTTGGTGGGGCA  
>HPV72\_Alpha\_1491683\_nt6825\_L1\_AOS\_rc|1  
AAGATACTCACGAAAATTAGAAGCTGTATATTCTGATACAGAGGACGCTGTGGCAGTACA  
>HPV72\_Alpha\_1491683\_nt6815\_L1\_AOS\_rc|1  
CGAAAATTAGAAGCTGTATATTCTGATACAGAGGACGCTGTGGCAGTACAAATAGTTACA  
>HPV72\_Alpha\_1491683\_nt6597\_L1\_AOS\_rc|1  
ACTACCAGGTGTCACCCTGTCGCTACCCGAGGCACCTTTAAGATATAAACTGGCTGGTAG  
>HPV72\_Alpha\_1491683\_nt6590\_L1\_AOS\_rc|1  
GGTGTCACCCTGTCGCTACCCGAGGCACCTTTAAGATATAAACTGGCTGGTAGTGCCTCA  
>HPV73\_Alpha\_1491692\_nt6515\_L1\_AOS\_rc|1  
TAAATTAGAGTTGGCATACTGTGTAGTAGAGCTACTAGCCTGTGTACCTACACATACAG  
>HPV73\_Alpha\_1491692\_nt6508\_L1\_AOS\_rc|1  
AGAGTTGGCATACTGTGTAGTAGAGCTACTAGCCTGTGTACCTACACATACAGAAAAATT  
>HPV73\_Alpha\_1491692\_nt6010\_L1\_AOS\_rc|1  
AGGGGTGTTCTTTAATTCCAGTGGGGGACAATCACCAGTATTAACAGTTTGTGAAGTACA  
>HPVcand86\_Alpha\_15741127\_nt6699\_L1\_AOS\_rc|1  
TAGATATTCATTAACTTAGAGGGTCATATTCAGAGGCCTTCTGGGTAGCGGCACTAAT  
>HPVcand86\_Alpha\_15741127\_nt6493\_L1\_AOS\_rc|1  
GGGTGGGTGCATATACATAACTGCTAAGGGATCCTCGGGGGCCTGAGGAGCCCTTTAAAT  
>HPV88\_Gamma\_167600365\_nt6759\_L1\_AOS\_rc|1  
TGTTCTGGAAGTATTTCTAACAGAACTATTGGCAACTGTCCTGACACGTTTTGTGGGCAG  
>HPV88\_Gamma\_167600365\_nt6768\_L1\_AOS\_rc|1  
TCTTTTTACTGTTCTGGAAGTATTTCTAACAGAACTATTGGCAACTGTCCTGACACGTTT  
>HPV88\_Gamma\_167600365\_nt6752\_L1\_AOS\_rc|1  
GAAGTATTTCTAACAGAACTATTGGCAACTGTCCTGACACGTTTTGTGGGCAGCAAACCA  
>HPV88\_Gamma\_167600365\_nt6445\_L1\_AOS\_rc|2  
GAGCTAAAAATATCAGGCTCCAAAGGAAGCTCTACAAAGCTGGAATATAGCTTCCAATTCGT  
>HPV88\_Gamma\_167600365\_nt6173\_L1\_AOS\_rc|1  
TCACTAGTAGTAAGTGATCCACTAGCAGTAGGGAAATAAACATGAGATCCCATTTTAAAA  
>HPV88\_Gamma\_167600365\_nt6166\_L1\_AOS\_rc|1  
TAGTAAGTGATCCACTAGCAGTAGGGAAATAAACATGAGATCCCATTTTAAAAATTCACAG  
>HPV88\_Gamma\_167600365\_nt6158\_L1\_AOS\_rc|1  
GATCCACTAGCAGTAGGGAAATAAACATGAGATCCCATTTTAAAAATTCACAGCATTTGTA  
>HPV88\_Gamma\_167600365\_nt6150\_L1\_AOS\_rc|1  
AGCAGTAGGGAAATAAACATGAGATCCCATTTTAAAAATTCACAGCATTTGTAGGTGGCAA  
>HPV88\_Gamma\_167600365\_nt6143\_L1\_AOS\_rc|1  
GGGAAATAAACATGAGATCCCATTTTAAAAATTCACAGCATTTGTAGGTGGCAATAAGTAT  
>HPV88\_Gamma\_167600365\_nt6132\_L1\_AOS\_rc|1  
ATGAGATCCCATTTTAAAAATTCACAGCATTTGTAGGTGGCAATAAGTATTTATTTCCCTC  
>HPV110\_Beta\_186461194\_nt6515\_L1\_AOS\_rc|1

GTAGAGTTTGCTAGTGTGCGTTGTTGTTGATCTTGCTTTGCTGGCAAGAAATAGTTATGA  
>HPV110\_Beta\_186461194\_nt6508\_L1\_AOS\_rc|1  
TTGCTAGTGTGCGTTGTTGTTGATCTTGCTTTGCTGGCAAGAAATAGTTATGATTTTGAT  
>HPV111\_Beta\_186461202\_nt6757\_L1\_AOS\_rc|2  
GAGATAAACTTCTGGAATAAAGAACTTTACATAGTTGAAGAATCAAAGACAATTGAT  
>HPV111\_Beta\_186461202\_nt6466\_L1\_AOS\_rc|1  
GATAATAAATGGAGTTACCCAAAATGTTTTGTTGTTGATTACCCCTGTGCTGGCAGATAAT  
>HPV111\_Beta\_186461202\_nt6445\_L1\_AOS\_rc|1  
AAATGTTTTGTTGTTGATTACCCCTGTGCTGGCAGATAATAATTGTGATTTTGTGCACTG  
>HPV111\_Beta\_186461202\_nt6436\_L1\_AOS\_rc|1  
GTTGTTGATTACCCCTGTGCTGGCAGATAATAATTGTGATTTTGTGCACTGCTGCATCTG  
>HPVFA75/KI88-03\_Unclassified\_206902429\_nt7084\_L1\_AOS\_rc|2  
TTATGTCCGTCGTCGTTTTGCAGTACCCCGAGAAACAGATCTGCTACGCTTTAATGATTT  
>HPVFA75/KI88-03\_Unclassified\_206902429\_nt7075\_L1\_AOS\_rc|1  
TCGTCGTTTTGCAGTACCCCGAGAAACAGATCTGCTACGCTTTAATGATTTGACCCTGGT  
>HPVFA75/KI88-03\_Unclassified\_206902429\_nt7068\_L1\_AOS\_rc|1  
TTTGCAGTACCCCGAGAAACAGATCTGCTACGCTTTAATGATTTGACCCTGGTGTCTCTGT  
>HPVFA75/KI88-03\_Unclassified\_206902429\_nt7061\_L1\_AOS\_rc|1  
TACCCCGAGAAACAGATCTGCTACGCTTTAATGATTTGACCCTGGTGTCTGTAAATCCTG  
>HPVFA75/KI88-03\_Unclassified\_206902429\_nt6902\_L1\_AOS\_rc|1  
CCTCTCTATCTTTTGCAGGAACCTTATCTGGACATTTAGTGGCTGAGGAATTTATAAATC  
>HPVFA75/KI88-03\_Unclassified\_206902429\_nt6670\_L1\_AOS\_rc|2  
TCTAAATTTGCTAGAATCATACTCAGTTATAGCACCATTATCTGAAGGTACACAAATGGT  
>HPVFA75/KI88-03\_Unclassified\_206902429\_nt6663\_L1\_AOS\_rc|1  
TTGCTAGAATCATACTCAGTTATAGCACCATTATCTGAAGGTACACAAATGGTAAAGTTA  
>HPVFA75/KI88-03\_Unclassified\_206902429\_nt6650\_L1\_AOS\_rc|2  
ACTCAGTTATAGCACCATTATCTGAAGGTACACAAATGGTAAAGTTAGTGTCTTAGTGT  
>HPVFA75/KI88-03\_Unclassified\_206902429\_nt6643\_L1\_AOS\_rc|1  
TATAGCACCATTATCTGAAGGTACACAAATGGTAAAGTTAGTGTCTTAGTGTATCAGC  
>HPVFA75/KI88-03\_Unclassified\_206902429\_nt6397\_L1\_AOS\_rc|1  
ATCTTGATTATTTGCTCCATCTGGAGTAGCGTCTCCAACATTACCTCCTCTGGTAAATA  
>HPV91\_Alpha\_22023568\_nt5981\_L1\_AOS\_rc|2  
TTACCAGAATTATTTTTTATAGGAAAAAAGGGTGGCCACAGCCAGTAAACGGGAACCTG  
>HPV91\_Alpha\_22023568\_nt5744\_L1\_AOS\_rc|1  
ATAAAAATCTGTGCCATATATTGATACTGCAGAAGGTGTAACAGACGGTGACAATGGCAC  
>HPV91\_Alpha\_22023568\_nt5726\_L1\_AOS\_rc|1  
TATTGATACTGCAGAAGGTGTAACAGACGGTGACAATGGCACATAGGGGACACTAAGTGG  
>HPV91\_Alpha\_22023568\_nt5700\_L1\_AOS\_rc|2  
ACGGTGACAATGGCACATAGGGGACACTAAGTGGCACTGTAGGAAATGTAATATCAGGTC  
>HPV91\_Alpha\_22023568\_nt5693\_L1\_AOS\_rc|1  
CAATGGCACATAGGGGACACTAAGTGGCACTGTAGGAAATGTAATATCAGGTCCTGCTTG  
>HPV91\_Alpha\_22023568\_nt5683\_L1\_AOS\_rc|1  
TAGGGGACACTAAGTGGCACTGTAGGAAATGTAATATCAGGTCCTGCTTGTGTATATATA  
>HPV91\_Alpha\_22023568\_nt5673\_L1\_AOS\_rc|1  
TAAGTGGCACTGTAGGAAATGTAATATCAGGTCCTGCTTGTGTATATATATCAGGTA  
>HPV91\_Alpha\_22023568\_nt5642\_L1\_AOS\_rc|1  
TCCTGCTTGTGTATATATATCAGGTAAGTGGCAAGTGGGACTGTAGTGTTAACAATTTT  
>HPV91\_Alpha\_22023568\_nt5627\_L1\_AOS\_rc|1  
TATATCAGGTAAGTGGCAAGTGGGACTGTAGTGTTAACAATTTTGTGTGTAGGCA  
>HPVcand89\_Alpha\_22095322\_nt6573\_L1\_AOS\_rc|1  
TATACATAGCTAGTAAGTGTATTTCTGTTATTAGCAGCAGACCCAGGCATATACAAGGTT  
>HPVcand89\_Alpha\_22095322\_nt6554\_L1\_AOS\_rc|1  
TATTTCTGTTATTAGCAGCAGACCCAGGCATATACAAGGTTTTTGGCAGGTCCTCACCCA  
>HPV90\_Alpha\_22138122\_nt6189\_L1\_AOS\_rc|1  
TATAGTCCATAGTAAGATTGTCCCGGGTGTATCGCCAGGCACAACATCATATAAATTGG

>HPV58\_Alpha\_222386\_nt5791\_L1\_AOS\_rc|1  
GTAAGCCTGATACCTTGGGAACATACTTTTTATTGTTATTGGGACTTTTGATGGAAA  
>HPV74\_Alpha\_27462483\_nt6609\_L1\_AOS\_rc|1  
GTTTGTAGTCTGTACTAGTATATGTAGCAGCAGGAGGGGATTGTGTAGTAGGCGCACACA  
>HPV74\_Alpha\_27462483\_nt6109\_L1\_AOS\_rc|1  
TGAATTACACTAGTAATTAATTCTAATGCAGGGCAATCGCCTGGCTTTACAGTAACATTA  
>HPV74\_Alpha\_27462483\_nt6102\_L1\_AOS\_rc|1  
CACTAGTAATTAATTCTAATGCAGGGCAATCGCCTGGCTTTACAGTAACATTAGAACATT  
>HPV92\_Beta\_27531786\_nt7104\_L1\_AOS\_rc|1  
CTTTTTTCGTTTAGTACCTCTTTGAGAACTGCTTCTAGTTCTTTTAAGACCATTAAACAGAT  
>HPV92\_Beta\_27531786\_nt7116\_L1\_AOS\_rc|1  
TAGTTACTTTTTCTTTTCGTTTAGTACCTCTTTGAGAACTGCTTCTAGTTCTTTTAAGA  
>HPV92\_Beta\_27531786\_nt7097\_L1\_AOS\_rc|1  
GTTTAGTACCTCTTTGAGAACTGCTTCTAGTTCTTTTAAGACCATTAAACAGATGTATTAG  
>HPV92\_Beta\_27531786\_nt7090\_L1\_AOS\_rc|1  
ACCTCTTTGAGAACTGCTTCTAGTTCTTTTAAGACCATTAAACAGATGTATTAGTTAATCC  
>HPV92\_Beta\_27531786\_nt6709\_L1\_AOS\_rc|1  
TCTAGTGTATTCTCTAATCTTTTGTGAATCATAGTCGGTTATTTGACCACCTTCCTTAGG  
>HPV92\_Beta\_27531786\_nt6434\_L1\_AOS\_rc|1  
GTAACATAAAGTTATGGTCTTCATTTACAACCTGCATCTGGGATGGTATCACCCACAACAC  
>HPV92\_Beta\_27531786\_nt6427\_L1\_AOS\_rc|1  
AAAGTTATGGTCTTCATTTACAACCTGCATCTGGGATGGTATCACCCACAACACCACCGCG  
>HPV92\_Beta\_27531786\_nt6420\_L1\_AOS\_rc|1  
TGGTCTTCATTTACAACCTGCATCTGGGATGGTATCACCCACAACACCACCGCGCACAAAC  
>HPV75\_Beta\_2911544\_nt7203\_L1\_AOS\_rc|1  
GGACACTGGCTGTTCTGGTTACCTTGGGAAGCCCTTCGTAAGCCTGCCTGAAAAAGGAATT  
>HPV75\_Beta\_2911544\_nt6633\_L1\_AOS\_rc|1  
AACCCTGACCGTGGGAACATAAATAGAGTTGCCCAAAGTGTTTTGAGCCTGCCCAGCGG  
>HPV75\_Beta\_2911544\_nt6624\_L1\_AOS\_rc|1  
CCGTGGGAACATAAATAGAGTTGCCCAAAGTGTTTTGAGCCTGCCCAGCGGCTGCAGGTA  
>HPV76\_Beta\_2911551\_nt6655\_L1\_AOS\_rc|1  
TAACGGTAGGCACGTAAATAGAGCTACCCAAAGTGTTTTGGGCCTGTCCAACAGCTGCAG  
>HPV76\_Beta\_2911551\_nt7242\_L1\_AOS\_rc|1  
GGATGCTGTGCGGACAGTGGCTGTCTGGATACTCTGGAAGCCCGTCGCAGGCCTGCTTG  
>HPV76\_Beta\_2911551\_nt7234\_L1\_AOS\_rc|1  
TGCGGACAGTGGCTGTCTGGATACTCTGGAAGCCCGTCGCAGGCCTGCTTGAAACAGAA  
>HPV76\_Beta\_2911551\_nt6118\_L1\_AOS\_rc|1  
TAAATAGGGGATGACCTGTAGACCCTACTCCTAGGGGTTGTCCGCGACCTATTTCCAAAC  
>HPV77\_Alpha\_2911558\_nt6602\_L1\_AOS\_rc|1  
GTATATAGCACTGCCGGGAGTCTCACGCCCCGCTACTCCCTTTGAGGTACAAAGATTCTGG  
>HPV77\_Alpha\_2911558\_nt7240\_L1\_AOS\_rc|1  
CACTTTTTGGAGCGCTTCCGTTTGGTCGAAGCTGGGGAGGGGTGGGCGCCCGGCGTTTG  
>HPV77\_Alpha\_2911558\_nt7230\_L1\_AOS\_rc|1  
AGCGCTTCCGTTTGGTCGAAGCTGGGGAGGGGTGGGCGCCCGGCGTTTGCGAGAGGGAA  
>HPV77\_Alpha\_2911558\_nt7223\_L1\_AOS\_rc|1  
CCGTTTGGTCGAAGCTGGGGAGGGGTGGGCGCCCGGCGTTTGCGAGAGGGAACCACCGA  
>HPV77\_Alpha\_2911558\_nt7214\_L1\_AOS\_rc|1  
CGAAGCTGGGGAGGGGTGGGCGCCCGGCGTTTGCGAGAGGGAACCACCGAACGACGTCG  
>HPV77\_Alpha\_2911558\_nt6587\_L1\_AOS\_rc|1  
GGGAGTCTCACGCCCCGCTACTCCCTTTGAGGTACAAAGATTCTGGAATTTTGTCTCCAAC  
>HPV77\_Alpha\_2911558\_nt6579\_L1\_AOS\_rc|1  
CACGCCCCGCTACTCCCTTTGAGGTACAAAGATTCTGGAATTTTGTCTCCAACATCACCCG  
>HPV80\_Beta\_2911565\_nt6571\_L1\_AOS\_rc|1  
CAGTAGGAAAAATATGTGAATTTGCTAAAAACAGTTGTTGCTGGCCTGTTTGTGCTGGTA  
>HPV80\_Beta\_2911565\_nt6772\_L1\_AOS\_rc|1

TAATATTTTGTGTATTATATTCAGTTATAGTACTACCATCAGAAGTAACACTTATGGTGA  
>HPV80\_Beta\_2911565\_nt6763\_L1\_AOS\_rc|2  
GTGTATTATATTCAGTTATAGTACTACCATCAGAAGTAACACTTATGGTGAAATTAGTGT  
>HPV80\_Beta\_2911565\_nt6756\_L1\_AOS\_rc|1  
ATATTCAGTTATAGTACTACCATCAGAAGTAACACTTATGGTGAAATTAGTGTTCCTTGT  
>HPV80\_Beta\_2911565\_nt6749\_L1\_AOS\_rc|1  
GTTATAGTACTACCATCAGAAGTAACACTTATGGTGAAATTAGTGTTCCTTGTATTATCA  
>HPV80\_Beta\_2911565\_nt6562\_L1\_AOS\_rc|1  
AATATGTGGAATTTGCTAAAACACGTTGTTGCTGGCCTGTTTGTGCTGGTAAATAAAAGT  
>HPVRTRX7\_Unclassified\_30315616\_nt7253\_L1\_AOS\_rc|1  
ATTCCAGAATGTTAATTTTTCATAAGGATCAGGTTTTTCCTTTGGTGGAATTTTATCGGG  
>HPVRTRX7\_Unclassified\_30315616\_nt6984\_L1\_AOS\_rc|1  
TTTGTGAGTCATATGATTGTATTTGCTGTATATCTTGATTTTCACTAGATATAGATATAC  
>HPV65\_Gamma\_312100\_nt6179\_L1\_AOS\_rc|1  
TAGGAGTGCCTATATATATATGTGGACCTAAAGTATTCTGATCCTGACCTTCTTGAGCAG  
>HPV65\_Gamma\_312100\_nt6172\_L1\_AOS\_rc|1  
GCCTATATATATATGTGGACCTAAAGTATTCTGATCCTGACCTTCTTGAGCAGGAATCCA  
>HPV65\_Gamma\_312100\_nt6165\_L1\_AOS\_rc|1  
TATATATGTGGACCTAAAGTATTCTGATCCTGACCTTCTTGAGCAGGAATCCAGTAATCA  
>HPV65\_Gamma\_312100\_nt6158\_L1\_AOS\_rc|1  
GTGGACCTAAAGTATTCTGATCCTGACCTTCTTGAGCAGGAATCCAGTAATCAGTTTTAA  
>HPV65\_Gamma\_312100\_nt6151\_L1\_AOS\_rc|2  
TAAAGTATTCTGATCCTGACCTTCTTGAGCAGGAATCCAGTAATCAGTTTTAACCTCGAA  
>HPV65\_Gamma\_312100\_nt6144\_L1\_AOS\_rc|1  
TTCTGATCCTGACCTTCTTGAGCAGGAATCCAGTAATCAGTTTTAACCTCGAAAGGTTCT  
>HPV65\_Gamma\_312100\_nt5585\_L1\_AOS\_rc|1  
TTCCTCTGAGTCTCCAAACAAGACGTTTCATGGTCAGAATCATAGAAACCATTATCAATCA  
>HPV65\_Gamma\_312100\_nt5576\_L1\_AOS\_rc|2  
GTCTCCAAACAAGACGTTTCATGGTCAGAATCATAGAAACCATTATCAATCAATGCAAACC  
>HPV67\_Alpha\_3228267\_nt6906\_L1\_AOS\_rc|1  
ATTGATTTCCCAAAAAGTACTTTTTAAGAGGATCTTCCTTTGCTGTTGGAGGGGATGT  
>HPV67\_Alpha\_3228267\_nt6895\_L1\_AOS\_rc|1  
AAAAACTGTACTTTTTAAGAGGATCTTCCTTTGCTGTTGGAGGGGATGTTTTTTGACAGG  
>HPV67\_Alpha\_3228267\_nt6760\_L1\_AOS\_rc|1  
AGTCTCTAATATATCTGGATTCATGGTGTGTATGTATTGCATAACATTTGCAGTAAGGG  
>HPV67\_Alpha\_3228267\_nt6753\_L1\_AOS\_rc|1  
TAATATATCTGGATTCATGGTGTGTATGTATTGCATAACATTTGCAGTAAGGGATATTTT  
>HPV67\_Alpha\_3228267\_nt6745\_L1\_AOS\_rc|1  
CTGGATTCATGGTGTGTATGTATTGCATAACATTTGCAGTAAGGGATATTTTGCACAGCT  
>HPV67\_Alpha\_3228267\_nt6738\_L1\_AOS\_rc|1  
CATGGTGTGTATGTATTGCATAACATTTGCAGTAAGGGATATTTTGCACAGCTGAAATAT  
>HPV67\_Alpha\_3228267\_nt6437\_L1\_AOS\_rc|1  
GGAAAAAAGCTGAGGTTTGCAGTGCAGAAGTGTTTGCAGATCCCTTAAAATACAAATCT  
>HPV67\_Alpha\_3228267\_nt5754\_L1\_AOS\_rc|1  
CACCTTGGGCACTAACACCTTTTTAGTGTGGAGGGATTAGGAATGGAAAAGTAAGGATG  
>HPV11\_Alpha\_333026\_nt7176\_L1\_AOS\_rc|2  
AGGGCTTAGACACAGCTGGGCGCTTTATACCTGTACGAGCAGACGTCCGTCCTCGATATC  
>HPV11\_Alpha\_333026\_nt7193\_L1\_AOS\_rc|1  
TCGTTTGGGGGCTGTAGAGGGCTTAGACACAGCTGGGCGCTTTATACCTGTACGAGCAGA  
>HPV11\_Alpha\_333026\_nt7186\_L1\_AOS\_rc|1  
GGGGCTGTAGAGGGCTTAGACACAGCTGGGCGCTTTATACCTGTACGAGCAGACGTCCGT  
>HPV11\_Alpha\_333026\_nt6787\_L1\_AOS\_rc|1  
TATTCCTTATAATCTGAATTAGTGTATGTAGCAGATTTAGACACAGATGCACATAGTGTG  
>HPV31\_Alpha\_333048\_nt6981\_L1\_AOS\_rc|1  
CTGGTGTAGTGGTAGATGCTGAGGGTGCACCTACGTTTACCTGCTTTAAATTTAGGACGTG

>HPV31\_Alpha\_333048\_nt6974\_L1\_AOS\_rc|1  
AGTGGTAGATGCTGAGGGTGCACCTACGTTTACCTGCTTTAAATTTAGGACGTGCCCTATA  
>HPV31\_Alpha\_333048\_nt6967\_L1\_AOS\_rc|2  
GATGCTGAGGGTGCACCTACGTTTACCTGCTTTAAATTTAGGACGTGCCCTATATCCTGCC  
>HPV33\_Alpha\_333049\_nt7012\_L1\_AOS\_rc|1  
TTTGCAGACGATGTGCGGGTGGATGTGGGGGCTGCACGTTTAAGTTTGGTTTGTCTTTA  
>HPV35\_Alpha\_333050\_nt6970\_L1\_AOS\_rc|1  
GCCTGCCTAATCTAAAATTAGGCCTGGCCTTTAGTCCTGCTTGTAACAAAAATTTACGGC  
>HPV35\_Alpha\_333050\_nt6992\_L1\_AOS\_rc|1  
GATGTAGATGCTGGAGCTGCACGCCTGCCTAATCTAAAATTAGGCCTGGCCTTTAGTCCT  
>HPV35\_Alpha\_333050\_nt6982\_L1\_AOS\_rc|1  
CTGGAGCTGCACGCCTGCCTAATCTAAAATTAGGCCTGGCCTTTAGTCCTGCTTGTAACA  
>HPV35\_Alpha\_333050\_nt6963\_L1\_AOS\_rc|1  
TAATCTAAAATTAGGCCTGGCCTTTAGTCCTGCTTGTAACAAAAATTTACGGCCCAACGG  
>HPV35\_Alpha\_333050\_nt5966\_L1\_AOS\_rc|1  
GAAATGCATTCCCTGTTATCTGTACCAGAGTTACCAGAGTTACCAACATATTTATTAAGA  
>HPV35\_Alpha\_333050\_nt5957\_L1\_AOS\_rc|1  
TCCCTGTTATCTGTACCAGAGTTACCAGAGTTACCAACATATTTATTAAGATTTTCAGTA  
>HPV35\_Alpha\_333050\_nt5714\_L1\_AOS\_rc|1  
CCAGATAACCTTGGGTACTGCTATTTTATTAGAATCTTGTTTTTAAATAGCATAGTATGGG  
>HPV47\_Beta\_333062\_nt6949\_L1\_AOS\_rc|1  
TAATCCTGTATATCCTTTATGTCCCCTGCCTGAGAGTAAACAGAGATGCTGAAATTTGTA  
>HPV47\_Beta\_333062\_nt6964\_L1\_AOS\_rc|1  
AAATTGTCTGCATTATAATCCTGTATATCCTTTATGTCCCCTGCCTGAGAGTAAACAGAG  
>HPV47\_Beta\_333062\_nt6956\_L1\_AOS\_rc|1  
TGCATTATAATCCTGTATATCCTTTATGTCCCCTGCCTGAGAGTAAACAGAGATGCTGAA  
>HPV42\_Alpha\_333211\_nt6618\_L1\_AOS\_rc|1  
ATGCATTATTAGCAGCCTTGGTATACAGTTCATCAGGTACAGGTTACCAATTGCGCCAG  
>HPV42\_Alpha\_333211\_nt7265\_L1\_AOS\_rc|1  
TTTAGCTGAAGAAACAGATTTAGCTGTAGACGCCTTTCGTTTACCTACAGACAGTTTAGG  
>HPV42\_Alpha\_333211\_nt6645\_L1\_AOS\_rc|1  
TACTACTACCTAAATTATGTCTGCCAGATGCATTATTAGCAGCCTTGGTATACAGTTCAT  
>HPV42\_Alpha\_333211\_nt6638\_L1\_AOS\_rc|1  
ACCTAAATTATGTCTGCCAGATGCATTATTAGCAGCCTTGGTATACAGTTCATCAGGTAC  
>HPV39\_Alpha\_333245\_nt7078\_L1\_AOS\_rc|2  
TGTGTTTGTAGCTGAGGACGAGGAAGTGGATGCAGCAGGCCGCTTTCGGGGACCTATAG  
>HPV39\_Alpha\_333245\_nt7071\_L1\_AOS\_rc|1  
AGTAGCTGAGGACGAGGAAGTGGATGCAGCAGGCCGCTTTCGGGGACCTATAGTAGGGCG  
>HPV39\_Alpha\_333245\_nt7063\_L1\_AOS\_rc|1  
AGGACGAGGAAGTGGATGCAGCAGGCCGCTTTCGGGGACCTATAGTAGGGCGCCTGCGGA  
>HPV39\_Alpha\_333245\_nt6856\_L1\_AOS\_rc|1  
CTGCAGACTGTAGGTATCTGTAAGTGTCTACCAAACCTGGCAGATGGTGGAGGAGCTACAG  
>HPV39\_Alpha\_333245\_nt6658\_L1\_AOS\_rc|2  
TAGAAGGATCATATGTAGAAGGTATGGAAGACTCTATAGAGGTAGATAATGTAAAGTTGG  
>HPV39\_Alpha\_333245\_nt6455\_L1\_AOS\_rc|1  
CAGTATACAGAACTACCGGGGTTTGCACGTATATCTGTGCCCTTAATATACAATTGGGCA  
>HPV39\_Alpha\_333245\_nt6448\_L1\_AOS\_rc|2  
CAGAACTACCGGGGTTTGCACGTATATCTGTGCCCTTAATATACAATTGGGCAGGAATGG  
>HPV39\_Alpha\_333245\_nt6441\_L1\_AOS\_rc|2  
ACCGGGGTTTGCACGTATATCTGTGCCCTTAATATACAATTGGGCAGGAATGGCGTCACC  
>HPV39\_Alpha\_333245\_nt6433\_L1\_AOS\_rc|1  
TTGCACGTATATCTGTGCCCTTAATATACAATTGGGCAGGAATGGCGTCACCCACCATAC  
>HPV39\_Alpha\_333245\_nt6426\_L1\_AOS\_rc|1  
TATATCTGTGCCCTTAATATACAATTGGGCAGGAATGGCGTCACCCACCATACCACCAG  
>HPV93\_Beta\_37089393\_nt7102\_L1\_AOS\_rc|1

TAGTTCCTCGAGAAATAGATGATGACCGTTTAGCTGGTGATTGTACAAGATTTGCCTGAT  
>HPV93\_Beta\_37089393\_nt6942\_L1\_AOS\_rc|1  
TTCCTTTGGTGGAACCTTATCGGGACATGGTGTAGCTAAACTATTAATATATCGATAAGT  
>HPV93\_Beta\_37089393\_nt6935\_L1\_AOS\_rc|2  
GGTGGAACCTTATCGGGACATGGTGTAGCTAAACTATTAATATATCGATAAGTACTCTGT  
>HPV93\_Beta\_37089393\_nt6928\_L1\_AOS\_rc|1  
CCTTATCGGGACATGGTGTAGCTAAACTATTAATATATCGATAAGTACTCTGTAACGGAT  
>HPV93\_Beta\_37089393\_nt6921\_L1\_AOS\_rc|2  
GGGACATGGTGTAGCTAAACTATTAATATATCGATAAGTACTCTGTAACGGATTGTCTGG  
>HPV93\_Beta\_37089393\_nt6158\_L1\_AOS\_rc|1  
ACTAATTGTATAGGTGGGCAAATCCCATTTTGGTCATTGGCTCCATCACATTTAGGTGCA  
>HPV93\_Beta\_37089393\_nt6151\_L1\_AOS\_rc|1  
GTATAGGTGGGCAAATCCCATTTTGGTCATTGGCTCCATCACATTTAGGTGCAACATCCC  
>HPV12\_Beta\_396910\_nt6897\_L1\_AOS\_rc|1  
ATAATTTGGAATGTCGTGTACATTTTGATTATCACTGTAAATAGATATACTGAAATTGGT  
>HPV12\_Beta\_396910\_nt6373\_L1\_AOS\_rc|1  
CTTCAATGAAAGTGTCTTTAACTCTATGGGAGGGCAAACACCATTTTCAGCTGGTGCAT  
>HPV14D\_Beta\_396918\_nt6445\_L1\_AOS\_rc|1  
CCAATATTGTTTGTGGTTGATTGTGCATTGGTGAATGTAATAAACATTCTTTAGGCTA  
>HPV14D\_Beta\_396918\_nt6672\_L1\_AOS\_rc|1  
TCTGAGAGGTATAATTGTCAATTTTGGATACCTCAGTGTCTTCTGAACTAACTGATATAC  
>HPV14D\_Beta\_396918\_nt6458\_L1\_AOS\_rc|1  
ATACATGGCATTGCCAATATTGTTTTGTGGTTGATTGTGCATTGGTGAATGTAATAAAC  
>HPV14D\_Beta\_396918\_nt5997\_L1\_AOS\_rc|1  
CAAATGACACATTTTGTCTGTGCATCAGTGGAGTTAGCTTGTTGCCTGTATGAGTTGGGAT  
>HPV14D\_Beta\_396918\_nt5982\_L1\_AOS\_rc|1  
GTCTGTGCATCAGTGGAGTTAGCTTGTTGCCTGTATGAGTTGGGATTTTCTGTATCACCAA  
>HPV15\_Beta\_396924\_nt6558\_L1\_AOS\_rc|1  
AACTGTGGGAAAGTAAGTAGAATTTGCTAAGTTATTTTGTGTTGGGTTGATTGTGCTGG  
>HPV15\_Beta\_396924\_nt6547\_L1\_AOS\_rc|1  
AGTAAGTAGAATTTGCTAAGTTATTTTGTGTTGGGTTGATTGTGCTGGTAAATAAAAAAT  
>HPV17\_Beta\_396932\_nt6751\_L1\_AOS\_rc|1  
CAGCCCCAGCTTCTGTAGACACGCTAATAGAAAAATTTGTGTTCCCTAGTGTGTCAGCTA  
>HPV17\_Beta\_396932\_nt6581\_L1\_AOS\_rc|2  
CTTACAGTTGGAAAATAAGTGAATTACCCAAAGTGCGCTGTTGTTGGCCAGTTTGAGCT  
>HPV17\_Beta\_396932\_nt6574\_L1\_AOS\_rc|1  
TTGGAAAATAAGTGAATTACCCAAAGTGCGCTGTTGTTGGCCAGTTTGAGCTGGTAAAT  
>HPV17\_Beta\_396932\_nt6565\_L1\_AOS\_rc|1  
AAGTGAATTACCCAAAGTGCGCTGTTGTTGGCCAGTTTGAGCTGGTAAATAAAATTTGT  
>HPV17\_Beta\_396932\_nt6558\_L1\_AOS\_rc|1  
ATTACCCAAAGTGCGCTGTTGTTGGCCAGTTTGAGCTGGTAAATAAAATTTGTGATCCTG  
>HPV17\_Beta\_396932\_nt6070\_L1\_AOS\_rc|1  
AGCTACTGTTATTTTTCAGTGTCTCTTAACCTATTAAACAAGGGATGTCTGTAGTGCCTA  
>HPV19\_Beta\_396940\_nt6704\_L1\_AOS\_rc|2  
ATTTCCATAAATTAGTATATTGTTGCTGACTATTGTTAGGAGGTATGTAGTATGTATTTTT  
>HPV25\_Beta\_396948\_nt7158\_L1\_AOS\_rc|1  
TGTGGCTAAAGAATCAATGTAGCGATAAGTATCCTGAATAGAATTGTCCGGTGCAGGAAC  
>HPV25\_Beta\_396948\_nt7147\_L1\_AOS\_rc|1  
AATCAATGTAGCGATAAGTATCCTGAATAGAATTGTCCGGTGCAGGAACGAATCCTAATT  
>HPV25\_Beta\_396948\_nt7061\_L1\_AOS\_rc|2  
ATTGCATTAATCTGAGCCAATATTTCTGCCCTCAACGGTACTTTGCAAAGTTGTAATATT  
>HPV25\_Beta\_396948\_nt7054\_L1\_AOS\_rc|2  
TAATCTGAGCCAATATTTCTGCCTTCAACGGTACTTTGCAAAGTTGTAATATTAATGATA  
>HPV25\_Beta\_396948\_nt7047\_L1\_AOS\_rc|1  
AGCCAATATTTCTGCCTTCAACGGTACTTTGCAAAGTTGTAATATTAATGATAACTCATA



>HPV25\_Beta\_396948\_nt6737\_L1\_AOS\_rc|1  
ATTGAGTTACCTAGATTATTATATTGAGCCTGACTACTGTTAGGTGGTATGTAAAATGCA  
>HPV27\_Alpha\_396964\_nt5524\_L1\_AOS\_rc|1  
CAACACCACCCGAGAGAGGGGCTGTAGTGGACCCTCGCAGTGTAGATGCAGAGGAGGCAG  
>HPV27\_Alpha\_396964\_nt5669\_L1\_AOS\_rc|1  
GGCCACAGGATATAACTTGGCAGTAAATAATAATCCCCCCCCAAATATGTAAACAGAGGAT  
>HPV27\_Alpha\_396964\_nt5641\_L1\_AOS\_rc|1  
AATAATCCCCCCCCAAATATGTAAACAGAGGATGGCAACGATGGAGCCACAGGAATGAGGG  
>HPV27\_Alpha\_396964\_nt5632\_L1\_AOS\_rc|1  
CCCCAAATATGTAAACAGAGGATGGCAACGATGGAGCCACAGGAATGAGGGGCCCCAAAC  
>HPV27\_Alpha\_396964\_nt5624\_L1\_AOS\_rc|1  
ATGTAAACAGAGGATGGCAACGATGGAGCCACAGGAATGAGGGGCCCCAAACCAGGAACA  
>HPV27\_Alpha\_396964\_nt5608\_L1\_AOS\_rc|1  
GCAACGATGGAGCCACAGGAATGAGGGGCCCCAAACCAGGAACAACGGGTGGTTCAATAT  
>HPV27\_Alpha\_396964\_nt5595\_L1\_AOS\_rc|1  
CACAGGAATGAGGGGCCCCAAACCAGGAACAACGGGTGGTTCAATATCAGGCCCAGTATA  
>HPV27\_Alpha\_396964\_nt5581\_L1\_AOS\_rc|1  
GCCCCAAACCAGGAACAACGGGTGGTTCAATATCAGGCCCAGTATACACAGGCACATCAA  
>HPV27\_Alpha\_396964\_nt5560\_L1\_AOS\_rc|1  
GTGGTTCAATATCAGGCCCAGTATACACAGGCACATCAACACCACCCGAGAGAGGGGCTG  
>HPV27\_Alpha\_396964\_nt5510\_L1\_AOS\_rc|1  
AGAGGGGCTGTAGTGGACCCTCGCAGTGTAGATGCAGAGGAGGCAGATACCGTGGTATTA  
>HPV30\_Alpha\_396973\_nt7098\_L1\_AOS\_rc|2  
TCACCGCCGCTTGCCTTTGGCTGATGGTGTAGAGGTAGAGGAAGTGGGGGCCGAGCGTTT  
>HPV30\_Alpha\_396973\_nt7090\_L1\_AOS\_rc|1  
GCTTGCCTTTGGCTGATGGTGTAGAGGTAGAGGAAGTGGGGGCCGAGCGTTTTTTTAGTAG  
>HPV30\_Alpha\_396973\_nt7082\_L1\_AOS\_rc|1  
TTGGCTGATGGTGTAGAGGTAGAGGAAGTGGGGGCCGAGCGTTTTTTTAGTAGTAGTAGAA  
>HPV30\_Alpha\_396973\_nt7075\_L1\_AOS\_rc|1  
ATGGTGTAGAGGTAGAGGAAGTGGGGGCCGAGCGTTTTTTTAGTAGTAGTAGAAGGTTTAG  
>HPV30\_Alpha\_396973\_nt7066\_L1\_AOS\_rc|1  
AGGTAGAGGAAGTGGGGGCCGAGCGTTTTTTTAGTAGTAGTAGAAGGTTTAGTACGAACCC  
>HPV30\_Alpha\_396973\_nt6841\_L1\_AOS\_rc|1  
ATTTGTCTCTAAGCTTGTGGCAGCTGGGGGTGACAATCCAATATTCCAGCCCTCAAGTA  
>HPV30\_Alpha\_396973\_nt6833\_L1\_AOS\_rc|1  
TCTAAGCTTGTGGCAGCTGGGGGTGACAATCCAATATTCCAGCCCTCAAGTAAAGTGGAG  
>HPV30\_Alpha\_396973\_nt6826\_L1\_AOS\_rc|2  
TTGTGGCAGCTGGGGGTGACAATCCAATATTCCAGCCCTCAAGTAAAGTGGAGTTCATAG  
>HPV30\_Alpha\_396973\_nt6819\_L1\_AOS\_rc|1  
AGCTGGGGGTGACAATCCAATATTCCAGCCCTCAAGTAAAGTGGAGTTCATAGTATGTAA  
>HPV30\_Alpha\_396973\_nt6655\_L1\_AOS\_rc|1  
TATATGTGGATAACGTTTGTGTGGTTGCAGATATAGTCATGTTTGTGTTCTAGTGGTGT  
>HPV3\_Alpha\_397005\_nt7029\_L1\_AOS\_rc|1  
GTTTAGTTTGGCGTAGGGGTCTTGCTTCTCAGTGGGAGGTGCATCTTCTGGCAGGTAAT  
>HPV3\_Alpha\_397005\_nt7178\_L1\_AOS\_rc|1  
GCAGCTGTTCTAGATGTGGTTGTGCGCGAGCGTTTACGAACAGATATACTAGAGCGGGTA  
>HPV3\_Alpha\_397005\_nt7154\_L1\_AOS\_rc|1  
GCCGAGCGTTTACGAACAGATATACTAGAGCGGGTACCTACACCGAGCTGCATGAGAAAT  
>HPV3\_Alpha\_397005\_nt7147\_L1\_AOS\_rc|1  
GTTTACGAACAGATATACTAGAGCGGGTACCTACACCGAGCTGCATGAGAAATTTCTCTGC  
>HPV3\_Alpha\_397005\_nt6772\_L1\_AOS\_rc|1  
ATTTAGTAGCATCATATGTAGCCGAGGTTTCAGTAGAAACACACAATGTCATATTAGTAC  
>HPV3\_Alpha\_397005\_nt6523\_L1\_AOS\_rc|1  
CTTTAATGTACAACGCGTCAGGCACGGTGTCTCCAGCCATACCAGCTCTGTTAAGAAAAAT  
>HPV40\_Alpha\_397014\_nt6569\_L1\_AOS\_rc|2

TAGGAGTCCGACCAGATGTACCTGTTATATATAAGTCAGTTGGGACACTATCACCAGTAG  
>HPV45\_Alpha\_397022\_nt7077\_L1\_AOS\_rc|1  
CGTATACGTACACGTTTGGCAGGCCTAGATGCAGTAGATGCAGTAGACGTGGAAGCAGCA  
>HPV45\_Alpha\_397022\_nt7089\_L1\_AOS\_rc|1  
TATTTCTTACTACGTATACGTACACGTTTGGCAGGCCTAGATGCAGTAGATGCAGTAGAC  
>HPV45\_Alpha\_397022\_nt7070\_L1\_AOS\_rc|1  
GTACACGTTTGGCAGGCCTAGATGCAGTAGATGCAGTAGACGTGGAAGCAGCAGGACGCT  
>HPV52\_Alpha\_397038\_nt6462\_L1\_AOS\_rc|1  
GCTTTGTACAGTGGCAGTATTGCCAGAGTTAGACCCTTGTATATATAAAATCACCTGGCAC  
>HPV52\_Alpha\_397038\_nt6455\_L1\_AOS\_rc|1  
ACAGTGGCAGTATTGCCAGAGTTAGACCCTTGTATATATAAAATCACCTGGCACAGGGTCA  
>HPV52\_Alpha\_397038\_nt6448\_L1\_AOS\_rc|1  
CAGTATTGCCAGAGTTAGACCCTTGTATATATAAAATCACCTGGCACAGGGTCACCTAAGG  
>HPV52\_Alpha\_397038\_nt6441\_L1\_AOS\_rc|1  
GCCAGAGTTAGACCCTTGTATATATAAAATCACCTGGCACAGGGTCACCTAAGGTACCGGC  
>HPV56\_Alpha\_397053\_nt6120\_L1\_AOS\_rc|1  
CTATAGGTGTATTAATTAATGCAAGAGGCGGGCAGTCCCCTGTGGTAACTTGTGTGGACT  
>HPV56\_Alpha\_397053\_nt7010\_L1\_AOS\_rc|1  
AGAGGTGGAGGTAGGAGCAGATCGCTTTTGTAGAGGTAGCTACAGCAGGCTTTGACCTAGT  
>HPV56\_Alpha\_397053\_nt7002\_L1\_AOS\_rc|2  
AGGTAGGAGCAGATCGCTTTTGTAGAGGTAGCTACAGCAGGCTTTGACCTAGTGCCCAGTT  
>HPV56\_Alpha\_397053\_nt6626\_L1\_AOS\_rc|1  
TCTAAGGTACTGATTAATTTTTCGTGCATCATATTTACTTAACTGTTCTGTAGCAGTACT  
>HPV56\_Alpha\_397053\_nt6409\_L1\_AOS\_rc|1  
ACATATACAGAACTCGGAGGGGGTTCTCTACCATTGCTACCCTTTAAATATAACTCTGCA  
>HPV56\_Alpha\_397053\_nt6387\_L1\_AOS\_rc|2  
GTTCTCTACCATTGCTACCCTTTAAATATAACTCTGCAGGTATTGTTTCCCCAACTTTAC  
>HPV56\_Alpha\_397053\_nt6108\_L1\_AOS\_rc|1  
TAATTAATGCAAGAGGCGGGCAGTCCCCTGTGGTAACTTGTGTGGACTTACACACAGCAC  
>HPV56\_Alpha\_397053\_nt5509\_L1\_AOS\_rc|1  
GCGCCTACGTCTAAAAAATACACAGGCCATAATGCAAAGGAGGATCCCTGTATATATAC  
>HPV56\_Alpha\_397053\_nt5502\_L1\_AOS\_rc|1  
CGTCTAAAAAATACACAGGCCATAATGCAAAGGAGGATCCCTGTATATATACATCATGG  
>HPV56\_Alpha\_397053\_nt5495\_L1\_AOS\_rc|1  
AAAAATACACAGGCCATAATGCAAAGGAGGATCCCTGTATATATACATCATGGGTAACAT  
>HPVcand62\_Alpha\_39932599\_nt6590\_L1\_AOS\_rc|1  
AATGTAAGTACCCGGCATTGTGTCTGTCACTGCCTGGGGTACCTTTTCATATACAGGTCAGT  
>HPVcand62\_Alpha\_39932599\_nt6583\_L1\_AOS\_rc|1  
CTGCCCCGGCATTTGTCTGTCACTGCCTGGGGTACCTTTTCATATACAGGTCAGTGGGCAGG  
>HPV43\_Alpha\_40804474\_nt6971\_L1\_AOS\_rc|1  
ATGGCCTTGTTAGACAAAAAGCGATAAGTATCTTCCAAAGAAGCAGAGGCAGGTGGGGAC  
>HPV43\_Alpha\_40804474\_nt6541\_L1\_AOS\_rc|2  
ACCTGGTATTAGAGCCAGCAATATACATATCGGAAGGCACAACGTCGCCAGTTTTACCAG  
>HPV81\_Alpha\_40804509\_nt6384\_L1\_AOS\_rc|2  
GAATGGTTGTATTTTAACTCCAAGGGGGGGCATTTCGTTTTGTGCTGGAGCAACATTAG  
>HPV81\_Alpha\_40804509\_nt6359\_L1\_AOS\_rc|2  
GGGGGGGCATTCGTTTTGTGCTGGAGCAACATTAGCACAAAAGGTACCCCGGGCCCAGTG  
>HPV95\_Gamma\_40804520\_nt6821\_L1\_AOS\_rc|1  
TTGTGCCTGTTGCAGTTTGAGAAGTAATAGCTCTTTGTCTTTTACGAGATCCATTTATTA  
>HPV95\_Gamma\_40804520\_nt6812\_L1\_AOS\_rc|1  
TTGCAGTTTGAGAAGTAATAGCTCTTTGTCTTTTACGAGATCCATTTATTAATCCACTCT  
>HPV95\_Gamma\_40804520\_nt6650\_L1\_AOS\_rc|1  
TTTCTGCTGGTGGATTTTGTAGTTGGACAACGAGTAGCTCTGGATGTAATGAATCTGTATT  
>HPV95\_Gamma\_40804520\_nt6232\_L1\_AOS\_rc|1  
AAGAGAACCGCTAGGAGTTCCAAAATAAATGTGAGGGCCAAGATTATTTTGTCTTGGTT

>HPV95\_Gamma\_40804520\_nt6224\_L1\_AOS\_rc|1  
CGCTAGGAGTTCCAAAATAAATGTGAGGGCCAAGATTATTTTGTTCCTTGGTTACTCTGAG  
>HPV95\_Gamma\_40804520\_nt6217\_L1\_AOS\_rc|1  
AGTTCCAAAATAAATGTGAGGGCCAAGATTATTTTGTTCCTTGGTTACTCTGAGCAGCAAT  
>HPV95\_Gamma\_40804520\_nt6210\_L1\_AOS\_rc|1  
AAATAAATGTGAGGGCCAAGATTATTTTGTTCCTTGGTTACTCTGAGCAGCAATTATGTAA  
>HPV95\_Gamma\_40804520\_nt6203\_L1\_AOS\_rc|1  
TGTGAGGGCCAAGATTATTTTGTTCCTTGGTTACTCTGAGCAGCAATTATGTAATCAGACT  
>HPV95\_Gamma\_40804520\_nt6196\_L1\_AOS\_rc|1  
GCCAAGATTATTTTGTTCCTTGGTTACTCTGAGCAGCAATTATGTAATCAGACTTCACTTC  
>HPV94\_Alpha\_40804528\_nt6559\_L1\_AOS\_rc|1  
ACCACCGGCCGACTTCAATATTAGAGTGTGAGGAATGGTGTCTCCCACTGCACTGGCTCT  
>HPV94\_Alpha\_40804528\_nt6552\_L1\_AOS\_rc|1  
GCCGACTTCAATATTAGAGTGTGAGGAATGGTGTCTCCCACTGCACTGGCTCTATTGAAA  
>HPVcand85\_Alpha\_4574720\_nt5995\_L1\_AOS\_rc|2  
CTGACACATTATCTCTAGTGTGCTGTGTAACACTACAGAAGTAGCAACATGGGAATTTTCTG  
>HPV96\_Beta\_50253426\_nt7334\_L1\_AOS\_rc|1  
CAGCGTCGTTTTTCGTTTTGTACCTCTTGAGGTTGTAGCCCTCCCGGTTACAGTAACCCCT  
>HPV96\_Beta\_50253426\_nt7326\_L1\_AOS\_rc|1  
TTTTTCGTTTTGTACCTCTTGAGGTTGTAGCCCTCCCGGTTACAGTAACCCCTCTGTTAAC  
>HPV96\_Beta\_50253426\_nt7319\_L1\_AOS\_rc|1  
TTTGTACCTCTTGAGGTTGTAGCCCTCCCGGTTACAGTAACCCCTCTGTTAACCTTTTTG  
>HPV96\_Beta\_50253426\_nt7312\_L1\_AOS\_rc|1  
CTCTTGAGGTTGTAGCCCTCCCGGTTACAGTAACCCCTCTGTTAACCTCTTTTGTTTTGCA  
>HPV96\_Beta\_50253426\_nt7303\_L1\_AOS\_rc|1  
TTGTAGCCCTCCCGGTTACAGTAACCCCTCTGTTAACCTCTTTTGTTTTGCAGGTTGGCTT  
>HPV96\_Beta\_50253426\_nt6751\_L1\_AOS\_rc|2  
TGAAAATCTGTGCATCTGTAGAACTAAAGATCCACTGACTGTGGGAGTGTAATGGAAC  
>HPV96\_Beta\_50253426\_nt6714\_L1\_AOS\_rc|1  
GACTGTGGGAGTGTAATGGAACCTTGCCATTGTATCTCTGTTTTGATCACTGGCAGCCTT  
>HPV96\_Beta\_50253426\_nt6707\_L1\_AOS\_rc|1  
GGAGTGTAATGGAACCTTGCCATTGTATCTCTGTTTTGATCACTGGCAGCCTTTAAATAA  
>HPV96\_Beta\_50253426\_nt6700\_L1\_AOS\_rc|1  
AAATGGAACCTTGCCATTGTATCTCTGTTTTGATCACTGGCAGCCTTTAAATAATAATGGT  
>HPV96\_Beta\_50253426\_nt6693\_L1\_AOS\_rc|1  
ACTTGCCATTGTATCTCTGTTTTGATCACTGGCAGCCTTTAAATAATAATGGTTGTCTTC  
>HPV83\_Alpha\_5059324\_nt6567\_L1\_AOS\_rc|2  
AGGAGCATAGATGTAGCTGGTAAGAGTGTTCCCTACTATTAGCAGATGTGCCTGGAATATA  
>HPV83\_Alpha\_5059324\_nt6560\_L1\_AOS\_rc|1  
TAGATGTAGCTGGTAAGAGTGTTCCCTACTATTAGCAGATGTGCCTGGAATATAATAAGAG  
>HPV83\_Alpha\_5059324\_nt6553\_L1\_AOS\_rc|1  
AGCTGGTAAGAGTGTTCCCTACTATTAGCAGATGTGCCTGGAATATAATAAGAGGTAGGCA  
>HPV83\_Alpha\_5059324\_nt6546\_L1\_AOS\_rc|1  
AAGAGTGTTCCCTACTATTAGCAGATGTGCCTGGAATATAATAAGAGGTAGGCAGCACCTC  
>HPV59\_Alpha\_557236\_nt7071\_L1\_AOS\_rc|2  
ATTTTCTGGAAGACTTGCGACGCTTAACACGTTTTTGGTGATGGGGTAGAGGTAGGGGCAG  
>HPV59\_Alpha\_557236\_nt7064\_L1\_AOS\_rc|1  
GGAAGACTTGCGACGCTTAACACGTTTTTGGTGATGGGGTAGAGGTAGGGGCAGGCGCTGC  
>HPV59\_Alpha\_557236\_nt7057\_L1\_AOS\_rc|1  
TTGCGACGCTTAACACGTTTTTGGTGATGGGGTAGAGGTAGGGGCAGGCGCTGCACGTTTG  
>HPV59\_Alpha\_557236\_nt6901\_L1\_AOS\_rc|3  
AGATCTACAGGCCAAAACCTTTAGTTTGTCTATAAGGGTCCTGTTTAACTGGCGGTGCGGTG  
>HPV59\_Alpha\_557236\_nt6643\_L1\_AOS\_rc|1  
CTGGCATATTCTTTAAACTGGTAGGTGTGTATACATTAGGAATAGAAGAAGTAGTAGAA  
>HPV59\_Alpha\_557236\_nt6634\_L1\_AOS\_rc|1

TCTTTAAACTGGTAGGTGTGTATACATTAGGAATAGAAGAAGTAGTAGAAGCACACACA  
>HPV59\_Alpha\_557236\_nt6627\_L1\_AOS\_rc|1  
AACTGGTAGGTGTGTATACATTAGGAATAGAAGAAGTAGTAGAAGCACACACAGAAAGAT  
>HPV59\_Alpha\_557236\_nt6620\_L1\_AOS\_rc|1  
AGGTGTGTATACATTAGGAATAGAAGAAGTAGTAGAAGCACACACAGAAAGATTGGTGCT  
>HPV6\_Alpha\_6002612\_nt7207\_L1\_AOS\_rc|1  
GTTTAGGGGCAGCAGAGGCTTTGGAAACAGCAGGGCGCTTAACACCGGTACGAATAGAGG  
>HPV6\_Alpha\_6002612\_nt7232\_L1\_AOS\_rc|1  
TACCTTTTGGTTTGGCGCGCTTACGTTTAGGGGCAGCAGAGGCTTTGGAAACAGCAGGG  
>HPV6\_Alpha\_6002612\_nt7223\_L1\_AOS\_rc|1  
GTTTTGGCGCGCTTACGTTTAGGGGCAGCAGAGGCTTTGGAAACAGCAGGGCGCTTAACA  
>HPV6\_Alpha\_6002612\_nt7216\_L1\_AOS\_rc|1  
CGCGCTTACGTTTAGGGGCAGCAGAGGCTTTGGAAACAGCAGGGCGCTTAACACCGGTAC  
>HPV6\_Alpha\_6002612\_nt7200\_L1\_AOS\_rc|1  
GGCAGCAGAGGCTTTGGAAACAGCAGGGCGCTTAACACCGGTACGAATAGAGGACCGTCC  
>HPV6\_Alpha\_6002612\_nt7193\_L1\_AOS\_rc|1  
GAGGCTTTGGAAACAGCAGGGCGCTTAACACCGGTACGAATAGAGGACCGTCCCCTATAT  
>HPV57\_Alpha\_60882\_nt6984\_L1\_AOS\_rc|1  
GGTCTTAGGGGGTGTGGGCTTCTGACATGTTATCGCTTGGGATTGCAAATACCTGTAGGT  
>HPV57\_Alpha\_60882\_nt6977\_L1\_AOS\_rc|1  
GGGGGTGTGGGCTTCTGACATGTTATCGCTTGGGATTGCAAATACCTGTAGGTGTCCTGC  
>HPV57\_Alpha\_60882\_nt6970\_L1\_AOS\_rc|1  
TGGGCTTCTGACATGTTATCGCTTGGGATTGCAAATACCTGTAGGTGTCCTGCAGGCTGG  
>HPV57\_Alpha\_60882\_nt6952\_L1\_AOS\_rc|1  
TCGCTTGGGATTGCAAATACCTGTAGGTGTCCTGCAGGCTGGCGGACGGGGGTGGGGGGA  
>HPV57\_Alpha\_60882\_nt6540\_L1\_AOS\_rc|1  
ACCGGGGGTCTGGACGGTAGAACTCTTGACATATAGCTCATCCGGGAGGGCGTCACCCAT  
>HPV57\_Alpha\_60882\_nt6370\_L1\_AOS\_rc|1  
TACATATGTTAGTACAGATATCCAAGGGGACATCTGATTTGTTGGACTGTAGAGCGGCAA  
>HPV69\_Alpha\_6970418\_nt6371\_L1\_AOS\_rc|2  
CTAGGCGTACGTGAGTATATAGAAGTAGTTGGAGGTTACGACCTTGACCAGCGCCTTTA  
>HPV82\_Alpha\_6970427\_nt6610\_L1\_AOS\_rc|1  
GCCTAATGTACTGCTTAAAGTTTGCTGGAGTAAATGTTTGTGCAACAGATGGAGTAACAG  
>HPV82\_Alpha\_6970427\_nt6589\_L1\_AOS\_rc|1  
TTGCTGGAGTAAATGTTTGTGCAACAGATGGAGTAACAGCAGTGCTAATGGTTAAATTGG  
>HPV82\_Alpha\_6970427\_nt6341\_L1\_AOS\_rc|3  
TTAATATAAGCCTTGTCTGGAATGGCATCACCAACCACACCAGCCTTATTATAGTAATGC  
>HPV68a\_Alpha\_71726685\_nt6284\_L1\_AOS\_rc|1  
GAGTTTCACGAATGTCAGTGCCCTTAATATACATGTCAGTGGGAATAGTGTCCTTACCA  
>HPV68a\_Alpha\_71726685\_nt6512\_L1\_AOS\_rc|1  
TAAATTTATTAGAATCATACACAGCTGGTACAGTAGAGTCTGTAGTAGTGACAAATGTAA  
>HPV68a\_Alpha\_71726685\_nt6277\_L1\_AOS\_rc|1  
ACGAATGTCAGTGCCCTTAATATACATGTCAGTGGGAATAGTGTCCTTACCATGCCTCC  
>HPV97\_Alpha\_71726694\_nt6956\_L1\_AOS\_rc|1  
ATTTTTTACGACGGACACGTAAACGCTTAGCAGGTTTGAAGTAGTAGGGGCAGACGGGG  
>HPV97\_Alpha\_71726694\_nt6530\_L1\_AOS\_rc|1  
TACTATACTGTTTATATTTTGTAGGGTCATATGTGGTAGCTACGCCATTTTGTGTAGAAG  
>HPV97\_Alpha\_71726694\_nt6522\_L1\_AOS\_rc|1  
TGTTTATATTTGTAGGGTCATATGTGGTAGCTACGCCATTTTGTGTAGAAGCACACAGT  
>HPV106\_Alpha\_71726710\_nt6586\_L1\_AOS\_rc|1  
AGAGGCGCGGATGTAGTAGTAGGCCCCTTAGTAAAAACCTTCCGGAACATCCTCCCC  
>HPV106\_Alpha\_71726710\_nt5690\_L1\_AOS\_rc|1  
CTAGGAAGCAACACATATGAGGGCAATAAATAATATGTAGACCCGTGCACAAGCACATCG  
>HPV106\_Alpha\_71726710\_nt5678\_L1\_AOS\_rc|1  
ACATATGAGGGCAATAAATAATATGTAGACCCGTGCACAAGCACATCGCCTGTGGGGTGA

>HPV106\_Alpha\_71726710\_nt5671\_L1\_AOS\_rc|1  
AGGGCAATAAATAATATGTAGACCCGTGCACAAGCACATCGCCTGTGGGGTGACCAGGAG  
>HPV106\_Alpha\_71726710\_nt5664\_L1\_AOS\_rc|2  
TAAATAATATGTAGACCCGTGCACAAGCACATCGCCTGTGGGGTGACCAGGAGGGGTAGG  
>HPV106\_Alpha\_71726710\_nt5656\_L1\_AOS\_rc|1  
ATGTAGACCCGTGCACAAGCACATCGCCTGTGGGGTGACCAGGAGGGGTAGGGGGCACGG  
>HPV106\_Alpha\_71726710\_nt5620\_L1\_AOS\_rc|1  
GACCAGGAGGGGTAGGGGGGCACGGGCCAAGCAGTGTGGGAATCGGGAAGAGCACTGTCAG  
>HPV106\_Alpha\_71726710\_nt5613\_L1\_AOS\_rc|1  
AGGGGTAGGGGGGCACGGGCCAAGCAGTGTGGGAATCGGGAAGAGCACTGTCAGGGCCACT  
>HPV106\_Alpha\_71726710\_nt5605\_L1\_AOS\_rc|1  
GGGGCACGGGCCAAGCAGTGTGGGAATCGGGAAGAGCACTGTCAGGGCCACTAAAAACAG  
>HPV102\_Alpha\_71726718\_nt5682\_L1\_AOS\_rc|1  
TAAGTAATTAGGCAATAAAAAATAGTCTGTACCATCCACAAACACAGATTGGGAAGGAAC  
>HPV102\_Alpha\_71726718\_nt5673\_L1\_AOS\_rc|1  
AGGCAATAAAAAATAGTCTGTACCATCCACAAACACAGATTGGGAAGGAACATTAGAGGA  
>HPV102\_Alpha\_71726718\_nt5525\_L1\_AOS\_rc|1  
GGTACTGTGACATTGTCTATACCGCGCAGAGACCACAGATGTAGCTGAAATATTTGTAGAT  
>HPV102\_Alpha\_71726718\_nt5518\_L1\_AOS\_rc|2  
TGACATTGTCTATACCGCGCAGAGACCACAGATGTAGCTGAAATATTTGTAGATTGCAAAG  
>HPV102\_Alpha\_71726718\_nt5511\_L1\_AOS\_rc|1  
GTCATACCGCGCAGAGACCACAGATGTAGCTGAAATATTTGTAGATTGCAAAGGAACAGA  
>HPV102\_Alpha\_71726718\_nt5493\_L1\_AOS\_rc|2  
CACAGATGTAGCTGAAATATTTGTAGATTGCAAAGGAACAGACGTGGAAGAAGTATATGA  
>HPV102\_Alpha\_71726718\_nt5482\_L1\_AOS\_rc|1  
CTGAAATATTTGTAGATTGCAAAGGAACAGACGTGGAAGAAGTATATGAAACATGTGGAG  
>HPV102\_Alpha\_71726718\_nt5475\_L1\_AOS\_rc|1  
ATTTGTAGATTGCAAAGGAACAGACGTGGAAGAAGTATATGAAACATGTGGAGACGCCAA  
>HPV102\_Alpha\_71726718\_nt5447\_L1\_AOS\_rc|1  
GAAGAAGTATATGAAACATGTGGAGACGCCAAGGAGTCCAAGTGGCCATTATCAGCATAA  
>HPV13\_Alpha\_85827580\_nt5868\_L1\_AOS\_rc|1  
TACCTTAGGGACAACAGTTTTGTTTTGTTTCTTAATAGGAAAATAAGGATTTCCCACTGC  
>HPV13\_Alpha\_85827580\_nt7147\_L1\_AOS\_rc|2  
TGGCAGTAGATGTAGATGCAGCACGTTTTCTACCTACACGAATAGGTGACCTAGACTGAA  
>HPV13\_Alpha\_85827580\_nt7140\_L1\_AOS\_rc|1  
AGATGTAGATGCAGCACGTTTTCTACCTACACGAATAGGTGACCTAGACTGAACGCCTGT  
>HPV13\_Alpha\_85827580\_nt7133\_L1\_AOS\_rc|1  
GATGCAGCACGTTTTCTACCTACACGAATAGGTGACCTAGACTGAACGCCTGTTTGTAAT  
>HPV13\_Alpha\_85827580\_nt6758\_L1\_AOS\_rc|1  
ATGTACTGTTTATATTCTGTGGCCTTATATGTGTCTGAAAGAGATGATGTAGTGGCTGCA  
>HPV13\_Alpha\_85827580\_nt6751\_L1\_AOS\_rc|1  
GTTTATATTCTGTGGCCTTATATGTGTCTGAAAGAGATGATGTAGTGGCTGCACACACAG  
>HPV13\_Alpha\_85827580\_nt6508\_L1\_AOS\_rc|1  
CCTTAACATATAATTCTGCTGGGATTAGTTCACCAACAGAGCCTGCCCTGTAAAGAAAT  
>HPV2\_Alpha\_9626032\_nt7210\_L1\_AOS\_rc|1  
GCCTTACCCGTTTTCTGTTTACTAGTGGGCGGCGTGGTCCCCGAAACAGCGGCGCGCTTGC  
>HPV2\_Alpha\_9626032\_nt6787\_L1\_AOS\_rc|1  
TGGTAGCCTTATAATTAGTATCAGACGCCTCAGTGGCACACAGAGATACATTAGTGCTAC  
>HPV41\_Nu\_9626041\_nt6790\_L1\_AOS\_rc|1  
GCAATGGACAGTATGTACCTATAATGATCCTCCAGTACAGAATTGGGAGGTGAAGTGACA  
>HPV41\_Nu\_9626041\_nt6775\_L1\_AOS\_rc|1  
TACCTATAATGATCCTCCAGTACAGAATTGGGAGGTGAAGTGACAGCTAAATGCCAGTCT  
>HPV41\_Nu\_9626041\_nt6768\_L1\_AOS\_rc|1  
AATGATCCTCCAGTACAGAATTGGGAGGTGAAGTGACAGCTAAATGCCAGTCTTCAATAA  
>HPV41\_Nu\_9626041\_nt6662\_L1\_AOS\_rc|1

GTCTACCTTACACAGCTGTAGAATAAAGGCAAGCTGAAACTCCTCGGTGTCCTTAAAAA  
>HPV41\_Nu\_9626041\_nt6287\_L1\_AOS\_rc|1  
CATTATATGCCTAGCATACAGAGCTTCACGCCGCACATAGAAAAACATGTGGTCTCCATA  
>HPV41\_Nu\_9626041\_nt5779\_L1\_AOS\_rc|1  
ACCAGACGCTCCTTGTCTAGGGTTAAAAAGGGACTTATCACAAAATGCAAAGGTATTGGGA  
>HPV41\_Nu\_9626041\_nt5772\_L1\_AOS\_rc|1  
GCTCCTTGTCTAGGGTTAAAAAGGGACTTATCACAAAATGCAAAGGTATTGGGATTTGGGA  
>HPV41\_Nu\_9626041\_nt5694\_L1\_AOS\_rc|1  
TGAAGTATTAGAGGAACTTTAGGGACCACCTCTTTGCCATCCGCATTAGTAATATTGT  
>HPV1\_Mu\_9626063\_nt6713\_L1\_AOS\_rc|2  
AGAATTTATATTGACTATAAGGATCAGTCTGGGGCTCAGGAGGCGCCTGTTCTGGACATT  
>HPV1\_Mu\_9626063\_nt6706\_L1\_AOS\_rc|1  
ATATTGACTATAAGGATCAGTCTGGGGCTCAGGAGGCGCCTGTTCTGGACATTTTGCTGC  
>HPV1\_Mu\_9626063\_nt6233\_L1\_AOS\_rc|1  
CTAAAGTTGTTCTTGGTTCAGCATCTGCTGTAAATACAGGCTTTGTGGGACTGCCTCCT  
>HPV1\_Mu\_9626063\_nt6226\_L1\_AOS\_rc|1  
TGTTCTTGGTTCAGCATCTGCTGTAAATACAGGCTTTGTGGGACTGCCTCCTTATCACC  
>HPV1\_Mu\_9626063\_nt6219\_L1\_AOS\_rc|1  
GGTTCAGCATCTGCTGTAAATACAGGCTTTGTGGGACTGCCTCCTTATCACCCACCGAA  
>HPV1\_Mu\_9626063\_nt6203\_L1\_AOS\_rc|2  
TTAAATACAGGCTTTGTGGGACTGCCTCCTTATCACCCACCGAACCCCCGCGAGTAAAAA  
>HPV1\_Mu\_9626063\_nt5440\_L1\_AOS\_rc|1  
GGACAGGATTCTAGTGATGGGCTGGGGAGGAAGATAGAAGTATTCTGCGCTGGTAACCA  
>HPV18\_Alpha\_9626069\_nt6649\_L1\_AOS\_rc|1  
TGCTATACTGCTTAAATTTGGTAGCATCATATTGCCAGGTACAGGAGACTGTGTAGAAG  
>HPV18\_Alpha\_9626069\_nt5455\_L1\_AOS\_rc|1  
GAGGCAGGGGCCGTGGGTGATACAATGGGCCATACAGAGGTAGTAGATGGTAATGTAATA  
>HPV18\_Alpha\_9626069\_nt5448\_L1\_AOS\_rc|1  
GGGCCGTGGGTGATACAATGGGCCATACAGAGGTAGTAGATGGTAATGTAATATCAGGAC  
>HPV18\_Alpha\_9626069\_nt5441\_L1\_AOS\_rc|2  
GGGTGATACAATGGGCCATACAGAGGTAGTAGATGGTAATGTAATATCAGGACCCGTGTA  
>HPV18\_Alpha\_9626069\_nt5434\_L1\_AOS\_rc|1  
ACAATGGGCCATACAGAGGTAGTAGATGGTAATGTAATATCAGGACCCGTGTATACAGGC  
>HPV4\_Gamma\_9626597\_nt6396\_L1\_AOS\_rc|1  
AATCACTAGCTTTATACTGATAATTGTCATTAGCACCATCTGACTTCACAGAAATTGTAA  
>HPV4\_Gamma\_9626597\_nt6420\_L1\_AOS\_rc|2  
CTATATGTCTGAGGTACTGTTTTAAATCACTAGCTTTATACTGATAATTGTCATTAGCAC  
>HPV4\_Gamma\_9626597\_nt6413\_L1\_AOS\_rc|1  
TCTGAGGTACTGTTTTAAATCACTAGCTTTATACTGATAATTGTCATTAGCACCATCTGA  
>HPV4\_Gamma\_9626597\_nt6406\_L1\_AOS\_rc|1  
TACTGTTTAAATCACTAGCTTTATACTGATAATTGTCATTAGCACCATCTGACTTCACA  
>HPV4\_Gamma\_9626597\_nt6200\_L1\_AOS\_rc|2  
ACTAGGGGTCCCTACATAAATATGAGGTCCATAAGTGTACTGATCTTGTGGTTTTGAGC  
>HPV63\_Mu\_9626605\_nt6567\_L1\_AOS\_rc|1  
ATAGCATTTGCAGGAGTTGAGAACTGTAACTGCCAGGAATCGATAATTGTTGGATCC  
>HPV63\_Mu\_9626605\_nt6560\_L1\_AOS\_rc|1  
TTGCAGGAGTTGAGAACTGTAACTGCCAGGAATCGATAATTGTTGGATCCATATTAT  
>HPV63\_Mu\_9626605\_nt6425\_L1\_AOS\_rc|1  
CATGGCGAGTATACTCATTATAATCTGCGCTATCATAAGTCTCAGGGGTTGCTTTGTAA  
>HPV63\_Mu\_9626605\_nt6417\_L1\_AOS\_rc|1  
GTATACTCATTATAATCTGCGCTATCATAAGTCTCAGGGGTTGCTTTGTAAAGAACATTT  
>HPV63\_Mu\_9626605\_nt6410\_L1\_AOS\_rc|1  
CATTATAATCTGCGCTATCATAAGTCTCAGGGGTTGCTTTGTAAAGAACATTTATATTCA  
>HPV63\_Mu\_9626605\_nt6403\_L1\_AOS\_rc|1  
ATCTGCGCTATCATAAGTCTCAGGGGTTGCTTTGTAAAGAACATTTATATTTCATCGTGGT

>HPV63\_Mu\_9626605\_nt6396\_L1\_AOS\_rc|1  
CTATCATAAGTCTCAGGGGTTGCTTTGTTAAGAACATTTATATTCATCGTGGTTCCTCTG  
>HPV63\_Mu\_9626605\_nt6206\_L1\_AOS\_rc|2  
CTACAAAATAATTATCTGTAGCAATAGTATTTTGGGGTTGCTCGGCTTTAGCAGCAATAT  
>HPV63\_Mu\_9626605\_nt6169\_L1\_AOS\_rc|1  
TTGCTCGGCTTTAGCAGCAATATATGCACTGGTAGGGACTTTCTCTTTTTCTACTAACAAT  
>HPV63\_Mu\_9626605\_nt6162\_L1\_AOS\_rc|1  
GCTTTAGCAGCAATATATGCACTGGTAGGGACTTTCTCTTTTTCTACTAACAATTCAGCA  
>HPV16\_Alpha\_9627100\_nt7066\_L1\_AOS\_rc|1  
TTGTAGAGGTAGATGAGGTGGTGGGTGTAGCTTTTCGTTTTCTTAATGTAAATTTTGGTT  
>HPV16\_Alpha\_9627100\_nt7059\_L1\_AOS\_rc|1  
GGTAGATGAGGTGGTGGGTGTAGCTTTTCGTTTTCTTAATGTAAATTTTGGTTTGGCCTT  
>HPV16\_Alpha\_9627100\_nt6455\_L1\_AOS\_rc|1  
GGAAAATAATTTGAAGTGGCTAAATTTGCAGTAGACCCAGAGCCTTTAATGTATAAATCG  
>HPV16\_Alpha\_9627100\_nt6448\_L1\_AOS\_rc|1  
AATTTGAAGTGGCTAAATTTGCAGTAGACCCAGAGCCTTTAATGTATAAATCGTCTGGTA  
>HPV16\_Alpha\_9627100\_nt6441\_L1\_AOS\_rc|2  
ACTGGCTAAATTTGCAGTAGACCCAGAGCCTTTAATGTATAAATCGTCTGGTACATTTTC  
>HPV16\_Alpha\_9627100\_nt6434\_L1\_AOS\_rc|2  
AAATTTGCAGTAGACCCAGAGCCTTTAATGTATAAATCGTCTGGTACATTTTCACCAACA  
>HPV5\_Beta\_9627145\_nt6972\_L1\_AOS\_rc|2  
TTATAGTCTGCAACATCTTTTAGTGCTCCAGCCTGATTATATACAGAAATACTGAAATTA  
>HPV5\_Beta\_9627145\_nt6989\_L1\_AOS\_rc|1  
CTCTAAATTGATCTGCATTATAGTCTGCAACATCTTTTAGTGCTCCAGCCTGATTATATA  
>HPV5\_Beta\_9627145\_nt6981\_L1\_AOS\_rc|2  
TGATCTGCATTATAGTCTGCAACATCTTTTAGTGCTCCAGCCTGATTATATACAGAAATA  
>HPV5\_Beta\_9627145\_nt6965\_L1\_AOS\_rc|1  
CTGCAACATCTTTTAGTGCTCCAGCCTGATTATATACAGAAATACTGAAATTAGTATTTTC  
>HPV5\_Beta\_9627145\_nt6740\_L1\_AOS\_rc|1  
GAGCTTGGCCATCAGCCCCTGGAATGTAAAACTGATTTTTGTATGTACCATTGTCAATTT  
>HPV5\_Beta\_9627145\_nt6731\_L1\_AOS\_rc|1  
CATCAGCCCCTGGAATGTAAAACTGATTTTTGTATGTACCATTGTCAATTTGTGCACGTG  
>HPV5\_Beta\_9627145\_nt6533\_L1\_AOS\_rc|1  
TGACGATGTCTAAACTGACATCTGATCTACTATCTTGAAGTGCCTTAAATTCATGTTCC  
>HPV5\_Beta\_9627145\_nt6520\_L1\_AOS\_rc|1  
ACTGACATCTGATCTACTATCTTGAAGTGCCTTAAATTCATGTTCCCAAACCTATGTC  
>HPV5\_Beta\_9627145\_nt6513\_L1\_AOS\_rc|1  
TCTGATCTACTATCTTGAAGTGCCTTAAATTCATGTTCCCAAACCTATGTCTGCCATA  
>HPV5\_Beta\_9627145\_nt6057\_L1\_AOS\_rc|1  
GAAACCTTAGGAACCTCAAGCTTATCACCATTAAATATTGTATACATTGAAATAAGGATGA  
>HPV26\_Alpha\_9627305\_nt6112\_L1\_AOS\_rc|1  
TCAATAATGCTGGAAATTAATTCTAAGGGGGGGCAATCCCCACGTTGTGTCTGTGTATTT  
>HPV32\_Alpha\_9627327\_nt6673\_L1\_AOS\_rc|1  
AGCTAAATTATTTCTGCCAGAAGCACCATTAGAAGCTTTTATATACATGTCCTCAGGAAC  
>HPV32\_Alpha\_9627327\_nt7323\_L1\_AOS\_rc|1  
TATTTACGTGTTTTCTGCGTTTTGCAGGAGAAGAAGACTTTTGAAGTGGGAGATGCTGTT  
>HPV32\_Alpha\_9627327\_nt7316\_L1\_AOS\_rc|1  
GTGTTTTTCTGCGTTTTGCAGGAGAAGAAGACTTTTGAAGTGGGAGATGCTGTTTCGTTTTA  
>HPV32\_Alpha\_9627327\_nt7309\_L1\_AOS\_rc|1  
TCTGCGTTTTGCAGGAGAAGAAGACTTTTGAAGTGGGAGATGCTGTTTCGTTTTACTGCTGT  
>HPV32\_Alpha\_9627327\_nt7302\_L1\_AOS\_rc|2  
TTTGCAGGAGAAGAAGACTTTTGAAGTGGGAGATGCTGTTTCGTTTTACTGCTGTAAAGTTA  
>HPV32\_Alpha\_9627327\_nt6656\_L1\_AOS\_rc|1  
CAGAAGCACCATTAGAAGCTTTTATATACATGTCCTCAGGAACAGGTTCCACCAAGGGTTC  
>HPV34\_Alpha\_9627334\_nt6019\_L1\_AOS\_rc|1

TGGTGTTCCTTAATTCAAGCGGAGGACATTCCCCAGCATTTTGGGTACCACATGGTGTGC  
>HPV34\_Alpha\_9627334\_nt6930\_L1\_AOS\_rc|1  
AGGTGCTGTACTAGATGATGAAGGTGCAGACCGTTTAGAGGCCTGTAACCTAGGACGGGC  
>HPV34\_Alpha\_9627334\_nt6526\_L1\_AOS\_rc|1  
TAAAAATTACTGTTTGCATATGGTGCAGTTGTACTTGTGGATTGTGTACCTACACAAACTG  
>HPV34\_Alpha\_9627334\_nt6519\_L1\_AOS\_rc|1  
ACTGTTTGCATATGGTGCAGTTGTACTTGTGGATTGTGTACCTACACAAACTGAAAAGTT  
>HPV34\_Alpha\_9627334\_nt6512\_L1\_AOS\_rc|1  
GCATATGGTGCAGTTGTACTTGTGGATTGTGTACCTACACAAACTGAAAAGTTTGTGCTT  
>HPV49\_Beta\_9627363\_nt7264\_L1\_AOS\_rc|1  
TAATACCCCGTGTGGAAGCTCTAGCAGCAGAGGATTTAGACACTCTAGAAGCCCGTTGTA  
>HPV49\_Beta\_9627363\_nt6871\_L1\_AOS\_rc|1  
ATTCTCTAACCTTGGTACTGTTCATATTCTGTAGGTGTCTGGCCATCCGTACTTACACTAA  
>HPV49\_Beta\_9627363\_nt6657\_L1\_AOS\_rc|1  
GAAATAGATGGAGCTGCCAAGAGTATTTTGGGCCTGTTGACTTGTCTGCAGGTAATATGTA  
>HPV53\_Alpha\_9627377\_nt7072\_L1\_AOS\_rc|1  
AGGGGGCTGAGGTAGATGTAGTAGAAGCAGAGCGTTTTTTAGAGGATACAGGCGGTTTAG  
>HPV7\_Alpha\_9627389\_nt6169\_L1\_AOS\_rc|1  
TTTTCTCTGCTGTCCTGACCAGGTACTGTTCCATATACAGACGAGTTTTCCACATCTTCA  
>HPV7\_Alpha\_9627389\_nt6833\_L1\_AOS\_rc|1  
ATGACGTAAATATTCTTTAACTTACTATTGTTCATATGGTGTGGTGTGGGCGATTGTGT  
>HPV7\_Alpha\_9627389\_nt6594\_L1\_AOS\_rc|1  
CTGCAATAGAAGCGCGATTAGATGAACCTGTTATATATAAATCATTTTGAACACTGTCTC  
>HPV7\_Alpha\_9627389\_nt6587\_L1\_AOS\_rc|1  
AGAAGCGCGATTAGATGAACCTGTTATATATAAATCATTTTGAACACTGTCTCCAGTAGT  
>HPV7\_Alpha\_9627389\_nt6162\_L1\_AOS\_rc|1  
TGCTGTCCTGACCAGGTACTGTTCCATATACAGACGAGTTTTCCACATCTTCATCTTTAT  
>HPV9\_Beta\_9627396\_nt6611\_L1\_AOS\_rc|1  
AATGACCCACTTACTGTAGGATAGTAGGTGGAATTAGCTATTGTTTCGTTGTTGTTGATCA  
>HPV9\_Beta\_9627396\_nt6886\_L1\_AOS\_rc|1  
GGGATAAATACTTCAGCTACTAAAGGCACTTTACACAACCTGTAAGATTAATGAAATCTGAT  
>HPV9\_Beta\_9627396\_nt6604\_L1\_AOS\_rc|1  
CACTTACTGTAGGATAGTAGGTGGAATTAGCTATTGTTTCGTTGTTGTTGATCACTTTTTG  
>HPV9\_Beta\_9627396\_nt6597\_L1\_AOS\_rc|1  
TGTAGGATAGTAGGTGGAATTAGCTATTGTTTCGTTGTTGTTGATCACTTTTTGCTGGCAA  
>HPV9\_Beta\_9627396\_nt6590\_L1\_AOS\_rc|1  
TAGTAGGTGGAATTAGCTATTGTTTCGTTGTTGTTGATCACTTTTTGCTGGCAAAAAGAAA  
>HPV9\_Beta\_9627396\_nt6574\_L1\_AOS\_rc|1  
CTATTGTTTCGTTGTTGTTGATCACTTTTTGCTGGCAAAAAGAAATTATGATCCTGGTTTA  
>HPV54\_Alpha\_9628437\_nt6631\_L1\_AOS\_rc|1  
ATGTCTAATATACTCCCTAAAGTCAGAATTATTAAAGCTATCCTGCGTGGATGCTGTAGC  
>HPV54\_Alpha\_9628437\_nt7047\_L1\_AOS\_rc|1  
TACCTTTTAGTTTTAGCACGCTTGCGCGCTGTACCCTTAGAGGAGGAAGGGGCTGCACGC  
>HPV54\_Alpha\_9628437\_nt7004\_L1\_AOS\_rc|1  
AGGAAGGGGCTGCACGCTTTACAGGCCGAAGGCGCGGACGTGCACGTAGGCCAGCCTGTA  
>HPV54\_Alpha\_9628437\_nt6623\_L1\_AOS\_rc|1  
TATACTCCCTAAAGTCAGAATTATTAAAGCTATCCTGCGTGGATGCTGTAGCACACAATG  
>HPV54\_Alpha\_9628437\_nt6616\_L1\_AOS\_rc|1  
CCTAAAGTCAGAATTATTAAAGCTATCCTGCGTGGATGCTGTAGCACACAATGTTAGGTT  
>HPV54\_Alpha\_9628437\_nt6420\_L1\_AOS\_rc|1  
GGAGTTGCAGCATAAATAGAAGTGTCAAGGTACCTGAGGATTTCTTAATGTATAAGTCA  
>HPV24\_Unclassified\_9628486\_nt6249\_L1\_AOS\_rc|1  
TCTTGAATTACTGAATTTACTAACTTAATAGGTGGACATCTACCAGCATCATTATTATCA  
>HPV24\_Unclassified\_9628486\_nt6800\_L1\_AOS\_rc|1  
TCTGATATTCCCTAAATTTATTAGCATCATACTCGTTAATATCTGTTACTTTGCCATTTT



>HPV24\_Unclassified\_9628486\_nt6785\_L1\_AOS\_rc|1  
ATTTATTAGCATCATACTCGTTAATATCTGTTACTTTGCCATTTTCAGTGTATACACTTA  
>HPV24\_Unclassified\_9628486\_nt6242\_L1\_AOS\_rc|1  
TTACTGAATTTACTAATTAATAGGTGGACATCTACCAGCATCATTATTATCACCAGCAC  
>HPV24\_Unclassified\_9628486\_nt6235\_L1\_AOS\_rc|1  
ATTTACTAATTAATAGGTGGACATCTACCAGCATCATTATTATCACCAGCACACCTCTC  
>HPV24\_Unclassified\_9628486\_nt6228\_L1\_AOS\_rc|1  
AACTTAATAGGTGGACATCTACCAGCATCATTATTATCACCAGCACACCTCTCAGCTACT  
>HPV24\_Unclassified\_9628486\_nt6221\_L1\_AOS\_rc|1  
TAGGTGGACATCTACCAGCATCATTATTATCACCAGCACACCTCTCAGCTACTTCCCAAT  
>HPV48\_Gamma\_9628542\_nt6558\_L1\_AOS\_rc|1  
TAAATCAGACGAGAAGCGCTCTGTCATATCTAAAGTCCAGAACTGTAAGCTTTGTATGG  
>HPV48\_Gamma\_9628542\_nt6653\_L1\_AOS\_rc|1  
GTACTAGATCCTGCAGCTGTATAGTCTGTTCTAGCTCGTTTACCATTTAACAACCAGTT  
>HPV48\_Gamma\_9628542\_nt6550\_L1\_AOS\_rc|1  
ACGAGAAGCGCTCTGTCATATCTAAAGTCCAGAACTGTAAGCTTTGTATGGATCTGTGT  
>HPV48\_Gamma\_9628542\_nt6543\_L1\_AOS\_rc|1  
GCGCTCTGTCATATCTAAAGTCCAGAACTGTAAGCTTTGTATGGATCTGTGTCTTCTTC  
>HPV48\_Gamma\_9628542\_nt6535\_L1\_AOS\_rc|1  
TCATATCTAAAGTCCAGAACTGTAAGCTTTGTATGGATCTGTGTCTTCTTCTGGTTCAG  
>HPV48\_Gamma\_9628542\_nt6507\_L1\_AOS\_rc|2  
TTTGTATGGATCTGTGTCTTCTTCTGGTTCAGCAGTAGGGCATTTAGTAGCCATGGATTT  
>HPV48\_Gamma\_9628542\_nt6498\_L1\_AOS\_rc|1  
ATCTGTGTCTTCTTCTGGTTCAGCAGTAGGGCATTTAGTAGCCATGGATTTGATATACCT  
>HPV48\_Gamma\_9628542\_nt6026\_L1\_AOS\_rc|1  
ACAGAAGATCCTAAATGAGAAGATCTGTTGTTTTGATCGGCAGAATCAGGAGTTATATAA  
>HPV48\_Gamma\_9628542\_nt6018\_L1\_AOS\_rc|1  
TCCTAAATGAGAAGATCTGTTGTTTTGATCGGCAGAATCAGGAGTTATATAATATACTCC  
>HPV48\_Gamma\_9628542\_nt5981\_L1\_AOS\_rc|2  
TCAGGAGTTATATAATATACTCCATTTTCTGTTGGTATAGGCTCCCCCATTTGGCCAGCT  
>HPV50\_Gamma\_9628550\_nt6294\_L1\_AOS\_rc|1  
CCTTTGAGTACATATAAGAACTTGCTACATTTAAAGGATCCAAAGGATTGACATCTTTCT  
>HPV50\_Gamma\_9628550\_nt6689\_L1\_AOS\_rc|1  
GGAACTGTAGCAACAGTGTAAATCAGTTCTAACTCTTCTCTTTAATAATCCAGTCTGAAA  
>HPV50\_Gamma\_9628550\_nt6325\_L1\_AOS\_rc|1  
TCAGTATGACGGCTGTACTGATTAAAATCATCCTTTGAGTACATATAAGAACTTGCTACA  
>HPV50\_Gamma\_9628550\_nt6318\_L1\_AOS\_rc|1  
GACGGCTGTACTGATTAAAATCATCCTTTGAGTACATATAAGAACTTGCTACATTTAAAG  
>HPV50\_Gamma\_9628550\_nt6311\_L1\_AOS\_rc|2  
GTACTGATTAAAATCATCCTTTGAGTACATATAAGAACTTGCTACATTTAAAGGATCCAA  
>HPV50\_Gamma\_9628550\_nt6287\_L1\_AOS\_rc|1  
GTACATATAAGAACTTGCTACATTTAAAGGATCCAAAGGATTGACATCTTCTTAACACT  
>HPV50\_Gamma\_9628550\_nt6051\_L1\_AOS\_rc|2  
TATTGGTTCTACGATTTTGCTCTGGTTGATTAGGGTTTACTGCATAATTATAAACTCCTG  
>HPV50\_Gamma\_9628550\_nt5860\_L1\_AOS\_rc|1  
CATAAGCTGATTGAATCCACTATATCTAAAGGGACCCCTGCTCTGTCCCTGTTGTAGTTTA  
>HPV50\_Gamma\_9628550\_nt5853\_L1\_AOS\_rc|1  
TGATTGAATCCACTATATCTAAAGGGACCCCTGCTCTGTCCCTGTTGTAGTTTAGGAAAGT  
>HPV50\_Gamma\_9628550\_nt5734\_L1\_AOS\_rc|1  
TGTATTGGAGGACACTTGCCATTATTTAAGCTGTTTTTGTACACAAGGTTCTGCTAAATCC  
>HPV60\_Gamma\_9628566\_nt6762\_L1\_AOS\_rc|1  
CTTTTTCCAAGAGAAAACCTGGGATAATTCGTTAGAAAAACGTTCTTGCAAATCTATTGTC  
>HPV60\_Gamma\_9628566\_nt6226\_L1\_AOS\_rc|1  
GAAGTAACTATAACCACCAAGGTTATTTGAGGTTTATCAGTTTGTGGTGCTAAGTAATA  
>HPV60\_Gamma\_9628566\_nt6218\_L1\_AOS\_rc|1

TATAACCACCAAGGTTATTTTGAGGTTTATCAGTTTGTGGTGCTAAGTAATATCCAGAAT  
>HPV61\_Alpha\_9628574\_nt6569\_L1\_AOS\_rc|1  
TACCAGGGGGCCGCTTGTTCATTCGCACCCTTAAGATAATAAGAGTCAGGCAGTGCCTCAC  
>HPVcand85\_Alpha\_4574720\_nt6511\_L1\_VE|1  
TCTTCAGATGCACAAATGTTTAATAAGCCTTATTGGCTGCACAAAGCCCAGGGACAAAAT  
>HPV88\_Gamma\_167600365\_nt5491\_L1\_VE|1  
AAAATTGAGATTCCTAAGGTGTCTGCATGCCAATATCGAGTGTTTAGGCTGAAATTGCCT  
>HPV17\_Beta\_396932\_nt6955\_L1\_VE|1  
GAAGACTGGCAGTTAGGATTTGTGCCTACACCAGATAACCCAGTGCATGATATATATAGG  
>HPV60\_Gamma\_9628566\_nt5876\_L1\_VE|1  
ATTGTAGGATGTAAACCAGCCACTGGTGAACACTGGGATATTGCTAAACCTTGTGATCCT  
>HPV22\_Beta\_1020178\_nt6593\_L1\_VE|1  
CAACTATTCAACAGGCCTTTTTGGTTGAAGCGCGCAGGGCCATAATAATGGTATTTTG  
>HPV73\_Alpha\_1491692\_nt6245\_L1\_VE|1  
GAACAAATGTTTGTTCGACACTTATTTAACAGGGCTGGTGATACCGGTGATAAAATCCCA  
>HPV13\_Alpha\_85827580\_nt6313\_L1\_VE|1  
GTAATTCAGGATGGTGACATGGTAGATACAGGATTTGGAGCCATGAATTTTGAGGAATTG  
>HPV42\_Alpha\_333211\_nt5847\_L1\_VE|1  
TGGCGGCCTAGTGACAACAAGGTTTATCTACCTCCTCCTGTTTCCAAGGTGGTCAGC  
>HPV95\_Gamma\_40804520\_nt6119\_L1\_VE|1  
GGCCGAAGGGAACAGCTTTATGCAAGACACTTTTTTGTAGAGCTGGGACAATGGGTGAT  
>HPV3\_Alpha\_397005\_nt6328\_L1\_VE|1  
CCTATACAAGATGGCGATATGGTGGACACAGGTTATGGTGCCATGGACTTTGGTAACTTG  
>HPVcand62\_Alpha\_39932599\_nt6678\_L1\_VE|1  
GTGTCTGTCTGATTCTCAGTTGTTTAATAAGCCATATTGGCTGCAGCGGGCGCAGGGCCAT  
>HPV48\_Gamma\_9628542\_nt5473\_L1\_VE|2  
AATTCAGATAAGGAACGTTTAGTTTGGAACTTGTGGTTTGGAAGTAGGCAGAGGGGGT  
>HPV92\_Beta\_27531786\_nt5669\_L1\_VE|1  
GTATACTTACCCCTTCAACACCGGTTGCAAGGGTACAAAGTACGGATGAATTTGTTCAA  
>HPV81\_Alpha\_40804509\_nt6765\_L1\_VE|1  
TCCTCTGATTCCCAGCTGTTTAATAAGCCTTATTGGCTACAACGGGCACAGGGCCATAAT  
>HPV63\_Mu\_9626605\_nt5672\_L1\_VE|2  
GGTCTTAGAGGCATAGAAATCGGTAGGGGTCAACCATTAGGTGTGGGTATTTTCAGGCAAT  
>HPV20\_Beta\_1020162\_nt6824\_L1\_VE|1  
TTGGTGTCTAGTGATGCTCAATTGTTTAATAGGCCATTTTGGCTGCAGCGCGCACAGGGC  
>HPV37\_Beta\_1020226\_nt5897\_L1\_VE|1  
ATCGAGGTTCCCTAAAGTATCTGGAAATCAATACAGAGCTTTTAGGGTTAGGTTGCCAGAT  
>HPV36\_Beta\_1020218\_nt6792\_L1\_VE|1  
GCCATGTATTACCCAACCTGTTAGTGGCTCATTTGGTGTCTAGTGATGCTCAATTGTTTAAC  
>HPV95\_Gamma\_40804520\_nt5489\_L1\_VE|1  
GAAAGACTTTTAACTGTAGGCCATCCTTATTTCCCAGTGAAAGATGTAGGTGAACCTAAG  
>HPV84\_Alpha\_12958167\_nt6086\_L1\_VE|1  
GCTGGGGACACTGACAGTAGGGATAATGTTTCTGTGGATTATAAAACAAACACAGCTGTTA  
>HPV40\_Alpha\_397014\_nt6530\_L1\_VE|1  
GAACAAATGTTTGTAGGCACTTTTTTAATAGGGCAGGTACTACTGGTGATAGTGTCCCA  
>HPVFA75/KI88-03\_Unclassified\_206902429\_nt5621\_L1\_VE|1  
ATGTCTCTCTGGCTTCCTGCAAGTGGTAAGGTATATTTGCCACCATCAACTCCAGTAGCT  
>HPV56\_Alpha\_397053\_nt5793\_L1\_VE|1  
GCATATCAATATAGGGTATTTAGGGTACGGTTGCCCGACCCTAATAAGTTTGGGCTTCCA  
>HPVFA75/KI88-03\_Unclassified\_206902429\_nt6371\_L1\_VE|1  
AGAAGGGAACAGTGCTATGCAAGACATTATTTTACCAGAGGAGGTAATGTTGGAGACGCT  
>HPV73\_Alpha\_1491692\_nt6065\_L1\_VE|1  
ACCCCTATACAGGATGGTGATATGATAGATGTTGGCTTTGGAGCCATGGATTTTAAAGCT  
>HPV59\_Alpha\_557236\_nt5697\_L1\_VE|1  
ACCAGTATTTTCTACCACGCAGGCAGTTCAGACTTCTTACAGTTGGACATCCATATTTT

>HPV88\_Gamma\_167600365\_nt6061\_L1\_VE|1  
TTTGGAACACGTGAGCAGTCGTATGCTCGCCATTTTATGGCTCGTGAAGGTAAAATGGGA  
>HPV52\_Alpha\_397038\_nt6586\_L1\_VE|1  
CCGTACTGGTTACAACGTGCGCAGGGCCACAATAATGGCATATGTTGGGGCAATCAGTTG  
>HPV10\_Alpha\_9627257\_nt5860\_L1\_VE|1  
CTGCCTCCCCTCCCGTGTCTAAAGTTCTCAGCACGGACGACTATGTGACACGCACCAAC  
>HPV33\_Alpha\_333049\_nt5805\_L1\_VE|1  
TATAGGGTTTTTAGGGTCCGTTTACCAGATCCTAATAAATTTGGATTTCCCTGACACCTCC  
>HPV48\_Gamma\_9628542\_nt5533\_L1\_VE|1  
CCTCTTGGCGTAGGATCTACAGGTCATCCTTTACTAAATAAGATAGGGGACACAGAAAAT  
>HPV22\_Beta\_1020178\_nt6563\_L1\_VE|1  
GTTAGTGGTTCTTTAGTAACCTCTGATGCCCACTATTCAACAGGCCTTTTTGGTTGAAG  
>HPVcand85\_Alpha\_4574720\_nt5611\_L1\_VE|1  
ATGGCTTTGTGGCGTTCTAGTGACAGCAAGGTATACCTTCCACCACCTTCAGTGGCTAAA  
>HPV42\_Alpha\_333211\_nt5877\_L1\_VE|1  
CCTCCTCCTCCTGTTTCCAAGGTGGTCAGCACTGATGAATATGTGCAACGCACCAACTAC  
>HPV81\_Alpha\_40804509\_nt6735\_L1\_VE|1  
TATGCCCTACACCTAGTGGGTCTATGGTATCCTCTGATTCCCAGCTGTTTAATAAGCCT  
>HPV2\_Alpha\_9626032\_nt5773\_L1\_VE|1  
TCCACTATTCTTTGCAGATGGCTTTGTGGCGGCCTAATGAAAGCAAGGTATACCTACCT  
>HPV90\_Alpha\_22138122\_nt6003\_L1\_VE|1  
TATAGGGTGTTTAGGGTACGTTTGCCTGATCCCAATAAGTTTGGCCTTCCTGATGCATCG  
>HPV26\_Alpha\_9627305\_nt6159\_L1\_VE|1  
TCCAGCATTATTGAGGATGGCGATATGATTGATACAGGCTTTGGAGCTATGGATTTTACT  
>HPV33\_Alpha\_333049\_nt5655\_L1\_VE|1  
GTTGTCAGCACTGATGAATATGTGTCTCGCACAAGCATTTATTATTATGCTGGTAGTTCC  
>HPV106\_Alpha\_71726710\_nt5990\_L1\_VE|1  
CAATATAGGGTATTTAGGGTTTCGTTTGCCTGATCCCAACAAATTTGGCCTTCCTGATGCA  
>HPV45\_Alpha\_397022\_nt6551\_L1\_VE|1  
TGGTTACATAAGGCCAGGGCCATAACAATGGTATTTGTTGGCATAATCAGTTGTTTGT  
>HPV41\_Nu\_9626041\_nt5667\_L1\_VE|2  
CGTTTGCTTACTGTTGGACATCCATTTTACAATATTACTAATGCGGATGGCAAAGAGGTG  
>HPV33\_Alpha\_333049\_nt6555\_L1\_VE|1  
AATGGTATTTGTTGGGGCAATCAGGTATTTGTTACTGTGGTAGATACCACTCGCAGTACT  
>HPVFA75/KI88-03\_Unclassified\_206902429\_nt6791\_L1\_VE|2  
TCACTGCAACCTGATGTGCTAGCCCAGATCAATGCAATGAATTCAGGTATATTAGAAGAT  
>HPV7\_Alpha\_9627389\_nt5979\_L1\_VE|1  
CCTAAAGTGCTGGACATCAATACAGAGTGTTTAGAGTACGCTTGCCCGACCCTAATAAA  
>HPV29\_Alpha\_1020210\_nt6744\_L1\_VE|1  
TACTGGCTACAGCAGGCCAGGGACACAACAATGGTATATGCTGGGCCAATCAGGTATTT  
>HPV48\_Gamma\_9628542\_nt6433\_L1\_VE|2  
AGAATATTAGAGGAGTGGCAATTAGCTTTTGTTCACCAGCTCCAACGGGCATTGAAGAT  
>HPVcand89\_Alpha\_22095322\_nt6668\_L1\_VE|1  
GATTCCCAGTTATTTAATAAGCCTTATTGGCTGCACCGTGCACAGGGCCATAATAATGGT  
>HPV44\_Alpha\_1020242\_nt6265\_L1\_VE|1  
GTAATTGAGGATGGTGATATGGTGGACACTGGTTTTGGAGCCATGAATTTGCTGAATTG  
>HPV19\_Beta\_396940\_nt6765\_L1\_VE|1  
GCCATGTATTTCCCAACTGTTAGTGGCTCATTAGTATCCAGTGATGCTCAATTGTTTAAC  
>HPV103\_Unclassified\_109390382\_nt5036\_L1\_VE|1  
GAAACGTCTATTTCTTCCATGCCTCCAGCGACCGCTGCTTACTGTAGGACACCCATAT  
>HPV73\_Alpha\_1491692\_nt5525\_L1\_VE|1  
CTGCCCCCTGTGTCTGTGTCTAAGGTTGTAAGCACAGATGAATATGTAACAAGAACAAAT  
>HPV59\_Alpha\_557236\_nt5787\_L1\_VE|1  
GATGTTCCCTAAGGTGTCTGCATATCAATACAGAGTATTTAGGGTTAAGTTACCTGATCCC  
>HPV52\_Alpha\_397038\_nt5956\_L1\_VE|1

TGTACAGGCTTGGAATTGGTAGGGGACAGCCTTTAGGTGTGGGTATTAGTGGGCATCCT  
>HPV35\_Alpha\_333050\_nt5635\_L1\_VE|1  
GTTGTTAGCACTGATGAATATGTAACACGCACAAACATCTACTATCATGCAGGCAGTTCT  
>HPV58\_Alpha\_222386\_nt5956\_L1\_VE|1  
GGCCTTGAAATAGGTAGGGGACAGCCATTGGGTGTTGGCGTAAGTGGTCATCCTTATTTA  
>HPV58\_Alpha\_222386\_nt5686\_L1\_VE|1  
CCTGTGCCTGTGTCTAAGGTTGTAAGCACTGATGAATATGTGTCACGCACAAGCATTTAT  
>HPV93\_Beta\_37089393\_nt6601\_L1\_VE|1  
TTTAATAGGCCCTTCTGGCTCCAACGCGCACAAAGGTCATAATAATGGTATTTGTTGGGCA  
>HPV58\_Alpha\_222386\_nt5716\_L1\_VE|1  
GATGAATATGTGTCACGCACAAGCATTTATTATTATGCTGGCAGTTCCAGACTTTTGGCT  
>HPV69\_Alpha\_6970418\_nt6472\_L1\_VE|1  
CCTTACTGGTTACAGCGTGCCAGGGTCATAATAATGGCATTGTTGGGGCAACCAATTG  
>HPV93\_Beta\_37089393\_nt5671\_L1\_VE|1  
GTATATTTGCCACCTTCAACACCAGTTGCCAGAGTACAAAGCACGGATGAATATGTACAA  
>HPV41\_Nu\_9626041\_nt5637\_L1\_VE|1  
ACCAGTACTTTCCTCCATGCTGCCACTGACCGTTTGCTTACTGTTGGACATCCATTTTAC  
>HPV38\_Beta\_1020234\_nt6412\_L1\_VE|1  
CGACGGGAGCAATGCTATGCCAGACATTATTTTTCGAGGTGGTGCAGTGGGTGACGCT  
>HPV102\_Alpha\_71726718\_nt6704\_L1\_VE|1  
CAACTGTTTAATAAGCCTTACTGGCTTCAACGGGCCAGGGACACAATAATGGCATTGT  
>HPV97\_Alpha\_71726694\_nt6407\_L1\_VE|1  
CAGTTGTTTAATAAGCCATATTGGTTGCATAGGGGCCAGGGCCATAACAATGGTATTTGT  
>HPV10\_Alpha\_9627257\_nt6400\_L1\_VE|1  
CCTATTACAGGATGGTGATATGGTGGACACTGGCTATGGGGCCATGGACTTTACTGCTTTA  
>HPV38\_Beta\_1020234\_nt5722\_L1\_VE|1  
CGCGTTCAAAGCACGGATGAATATGTGGAACGAACAGACATCTATTACCATGCAACTAGC  
>HPVFA75/KI88-03\_Unclassified\_206902429\_nt6521\_L1\_VE|1  
CCTACTGTAGTGGTTCTCTAGTCTCTTCAGATGCTCAGTTATTTAATAGGCCTTTTGG  
>HPV58\_Alpha\_222386\_nt6586\_L1\_VE|1  
CGTGCACAAGGTCATAACAATGGCATTGCTGGGGCAATCAGTTATTTGTTACCGTGGTT  
>HPV42\_Alpha\_333211\_nt6147\_L1\_VE|1  
CTAGAAGTAGGTCGTGGACAGCCTTTGGGCGTTGGTATTAGTGGCCATCCATTATTGAAT  
>HPV41\_Nu\_9626041\_nt5847\_L1\_VE|1  
ATTCGTGGGATTGAGGTTTCTAGGGGACAGCCCTTAGGTATTGGTGTAACAGGGAACCCT  
>HPV50\_Gamma\_9628550\_nt5562\_L1\_VE|1  
CCTTTAGGTGTTGGATCTACTGGTCATCCCTTGTTTAATAAGGTTGGAGACACAGAAAAT  
>HPV103\_Unclassified\_109390382\_nt5066\_L1\_VE|1  
GACCGCTGCTTACTGTAGGACACCCATATTTTCCAATTACAAAAGTGGGTGAAGGTACA  
>HPV52\_Alpha\_397038\_nt5716\_L1\_VE|1  
GATGAGTATGTGTCTCGCACAAAGCATCTATTATTATGCAGGCAGTTCTCGATTACTAACA  
>HPV92\_Beta\_27531786\_nt6599\_L1\_VE|1  
CCATATTGGTTACAAAGAGCACAAAGGCCACAACAATGGTATTTGCTGGAGTAATGAACTG  
>HPV92\_Beta\_27531786\_nt6569\_L1\_VE|1  
GTATCCACTGATGCACAATTATTTAATCGGCCATATTGGTTACAAAGAGCACAAAGGCCAC  
>HPV21\_Beta\_1020170\_nt6830\_L1\_VE|1  
GGTAACTCCATGTATTTCCCAACTGTCAGTGGCTCATTGGTGTCTAGTGACGCTCAATTG  
>HPV9\_Beta\_9627396\_nt5776\_L1\_VE|1  
GTATATTGCCACCAGCAACACCAGTGGCGAGAGTTCAAAGCACCGATGAATATGTGGAA  
>HPV32\_Alpha\_9627327\_nt6443\_L1\_VE|1  
GTTATTACAGGATGGTGATATGGCAGATGTAGGGTTTGAGCAATGGACTTTAGTGCTTTG  
>HPV76\_Beta\_2911551\_nt5830\_L1\_VE|1  
AAGGTTTATCTTCCACCATCAACACCTGTGGCCAGGGTTCAAAGCACGGATGAATACATT  
>HPV97\_Alpha\_71726694\_nt6077\_L1\_VE|1  
TTGGAGGATGGCGATATGGTAGATACAGGTTATGGTGCCATGGACTTTAGTACATTACAG

>HPV1\_Mu\_9626063\_nt6014\_L1\_VE|1  
GATGGTGACATGATGGATATTGGTTTTGGGGCTATGGATTTTGCTGCTTTACAGCAAGAC  
>HPV11\_Alpha\_333026\_nt6702\_L1\_VE|1  
CAAAAGGCTCAGGGACATAACAATGGTATTGCTGGGGAAACCACTTGTTTGTACTGTG  
>HPV66\_Alpha\_1020290\_nt6608\_L1\_VE|1  
GGCATATGCTGGGGTAATCAGGTATTTGTTACTGTTGTGGATACTACCAGAAGCACCAAC  
>HPV34\_Alpha\_9627334\_nt6421\_L1\_VE|1  
AATAAGCCTTATTGGTTGCAAAAGGCCAGGGACAAAACAATGGCATTGCTGGCATAAT  
>HPV107\_Beta\_126131393\_nt6749\_L1\_VE|1  
TGGTTGAAACGTGCACAAGGCCACAATAATGGTATTCTATGGGGAAACCAAATGTTTGT  
>HPV65\_Gamma\_312100\_nt5447\_L1\_VE|1  
GAAAGGCTTTTAACTGTAGGCCATCCTTATTTCCAGTGAAAGATGTGCAGGATCAACAC  
>HPV30\_Alpha\_396973\_nt6592\_L1\_VE|1  
CAACGCGCACAGGGACACAATAATGGCATTTGTTGGGGCAACCAGGTATTTGTTACTGTT  
>HPV34\_Alpha\_9627334\_nt6181\_L1\_VE|1  
ATATGTAAATATCCAGATTATCTAGGCATGGCCGCAGATCCCTATGGCGATTCTATGTGG  
>HPV70\_Alpha\_1173493\_nt5921\_L1\_VE|1  
CAGCCATTGGGCGTTGGCGTTAGTGGACATCCTTTATATAATAGATTGGATGATACTGAA  
>HPV58\_Alpha\_222386\_nt6616\_L1\_VE|1  
TGGGGCAATCAGTTATTTGTTACCGTGGTTGATACCACTCGTAGCACTAATATGACATTA  
>HPV96\_Beta\_50253426\_nt5917\_L1\_VE|1  
GCCAGGGTGCAAAGCACGGACTCCTACATACAAAGAACAACATCTATTATCATGCTAAT  
>HPV96\_Beta\_50253426\_nt6187\_L1\_VE|1  
GGTCGTGGACAGCCATTAGGTGTAGGTACATCAGGACATCCATTATTTAACAAGGTGAAA  
>HPV49\_Beta\_9627363\_nt5842\_L1\_VE|1  
AAGGTATATCTACCACCTTCAACACCTGTGGCAAGGGTACAAAGCACGGATGAATACATT  
>HPV82\_Alpha\_6970427\_nt5872\_L1\_VE|1  
TGTGTTGGTGTGTAAGTAGGTAGGGGTGAGCCGTTAGGTGTTGGCCTTAGTGGTCATCCT  
>HPV50\_Gamma\_9628550\_nt6462\_L1\_VE|1  
ATGGACCCCAGAATTTTGAAAAATTGGCAATTAGCTTATGTTCCACCAGCTCCCAGTGGT  
>HPV103\_Unclassified\_109390382\_nt5546\_L1\_VE|1  
TGTGATATTGGCTTTGGTGCAATGAATTTTGCTACATTGCAGGAGGACCATTCAGGTGTA  
>HPV53\_Alpha\_9627377\_nt6526\_L1\_VE|1  
GCTACACCTAGTGGGTCTATGATAACTTCAGAGGCTCAATTGTTTAATAAGCCATATTGG  
>HPV70\_Alpha\_1173493\_nt6521\_L1\_VE|1  
TTGCATAAGGCCAGGGACACAATAATGGCATTGTTGGCATAACCAGTTGTTTATTACT  
>HPV34\_Alpha\_9627334\_nt5731\_L1\_VE|1  
CGTTTTGCCAGATCCCAATAAATTTGGGTTCAGATGCATCTTTTTATAATCCTGACAAG  
>HPV96\_Beta\_50253426\_nt5887\_L1\_VE|1  
AAGGTCTATTTACCACCATCAACACCAGTTGCCAGGGTGCAAAGCACGGACTCCTACATA  
>HPV17\_Beta\_396932\_nt5755\_L1\_VE|1  
GTATACTTGCTCCAACACCACCAGTAGCCCGAGTACAAAGCACGGATGAGTATGTGGAA  
>HPV82\_Alpha\_6970427\_nt6142\_L1\_VE|1  
TCTACTGTCATTGAGGATGGCGATATGGTGGACACTGGTTTTGGGGCCATGGATTTTGCT  
>HPV37\_Beta\_1020226\_nt5987\_L1\_VE|1  
GTATATAATCCAGAAAAGGAAAGGTTGGTGTGGGCCTGTGCGGGCTTGAGATAGGCCGA  
>HPV9\_Beta\_9627396\_nt6676\_L1\_VE|1  
ACTTCAGATGCTCAATTGTTTAAATAGGCCATTTTGGCTCCAAGAGCACAAAGTCAACAAC  
>HPVTRX7\_Unclassified\_30315616\_nt6882\_L1\_VE|1  
AGGCCCTTCTGGCTGCAAAGAGCACAGGGTCATAATAATGGCATTCTGTGGGCTAATCAG  
>HPV71\_Alpha\_12084981\_nt5807\_L1\_VE|1  
CTAAACGTGTCCACTATTTTTTTGTCAGATGGCTTTGTGGCGGCCTAGTGACAGCAAGGTA  
>HPV84\_Alpha\_12958167\_nt6596\_L1\_VE|1  
AATAAGCCATACTGGTTGCAAAAGGCCAGGGTCATAACAATGGTATATGCTGGTTTAAT  
>HPV80\_Beta\_2911565\_nt5749\_L1\_VE|1

GTGTATTTACCACCAACACCACCTGTAGCACGTGTACAAAGCACCGATGAATATGTGGAA  
>HPV65\_Gamma\_312100\_nt5417\_L1\_VE|1  
GGAACATCTCTTTATTTCCACGCTGGAACAGAAAGGCTTTTAACTGTAGGCCATCCTTAT  
>HPV11\_Alpha\_333026\_nt6432\_L1\_VE|1  
ATTTGTGGAAGTGTCTGCAAATATCCTGATTATTTGCAAATGGCTGCAGACCCTTATGGT  
>HPV74\_Alpha\_27462483\_nt6024\_L1\_VE|1  
GCTATGGATTATAAGCAAACACAGTTATGCATGGTAGGCTGTGCTCCCCCGTTGGGTGAA  
>HPV31\_Alpha\_333048\_nt6483\_L1\_VE|1  
CCATATTGGATGCAACGTGCTCAGGGACACAATAATGGTATTTGTTGGGGCAATCAGTTA  
>HPV101\_Unclassified\_109390389\_nt5608\_L1\_VE|1  
GTGTCCTCTGTTATTCAGGATGGGGATATGTGTGATATTGGCTTTGGTGCCATGAATTTT  
>HPV52\_Alpha\_397038\_nt6406\_L1\_VE|1  
CGTGAGCAAATGTTTGTAGACACTTTTTTAATAGGGCCGGTACCTTAGGTGACCCTGTG  
>HPV22\_Beta\_1020178\_nt6143\_L1\_VE|1  
TGTATACCGTGTTTAGGTGAATATTGGGATAAAGCTCCTGTTTGTGAAGATGCAGGCAGT  
>HPV83\_Alpha\_5059324\_nt6673\_L1\_VE|1  
AAGCCCTACTGGCTGCATCGTGCCAGGGACATAAATGGCATTGTGTTGTTAATGAG  
>HPV28\_Alpha\_1020202\_nt6311\_L1\_VE|1  
ACTGCCCCCTATTCAGGATGGTGATATGGTGACACTGGCTTTGGTGCAATGGACTTTGCT  
>HPV88\_Gamma\_167600365\_nt5431\_L1\_VE|1  
GATCGTCTGTTAACAGTAGACCATCCCTACTATGAAATTAGGAATGATGGAGATCCCAAC  
>HPV53\_Alpha\_9627377\_nt6586\_L1\_VE|1  
CTGCAACGTGCCAGGGACATAAATAGGCATCTGTTGGAACAATCAGTTATTTGTAAC  
>HPV82\_Alpha\_6970427\_nt6472\_L1\_VE|1  
ACCTCTGATTCTCAGATTTTTAATAAGCCTTATTGGTTGCATCGCGCCAGGGCCACAAT  
>HPV107\_Beta\_126131393\_nt6539\_L1\_VE|1  
AGGAGAGAACAATGTTATGCTAGACATTATTTCACTAGAGGAGGAGCTGTGGGTGATGCT  
>HPVcand62\_Alpha\_39932599\_nt5778\_L1\_VE|1  
ATGGCTATGTGGCGGCCTGGTGACGGCAAGGTATACCTGCCTCCCACTCCTGTTTCTAAG  
>HPV8\_Beta\_333074\_nt6812\_L1\_VE|1  
CCTTTCTGGCTGCAGCGTGCCAGGGTCATAAATGGCATTCTCTGGGCTAATCAAATG  
>HPV17\_Beta\_396932\_nt5935\_L1\_VE|1  
TATAGAGCCTTCAGAGTCACATTACCAGATCCTAATAAGTTTGCCTTGGCAGATATGTCA  
>HPV70\_Alpha\_1173493\_nt6491\_L1\_VE|1  
GATTCCCAGTTGTTTAATAAGCCCTATTGGTTGCATAAGGCCAGGGACACAATAATGGC  
>HPV91\_Alpha\_22023568\_nt6316\_L1\_VE|1  
TATAAACAACACAGCTATGTATTGTTGGCTGTACACCTCCCATGGGCGAATATTGGGGC  
>HPV43\_Alpha\_40804474\_nt6328\_L1\_VE|1  
GAAGTTATACAGGATGGTGACATGGTAGATACAGGATTTGGTGCAATGGATTTTGCTTCC  
>HPVcand89\_Alpha\_22095322\_nt6698\_L1\_VE|1  
CTGCACCGTGCACAGGGCCATAAATGGTATTTGTTGGTTTAATGAGTTGTTTGTACT  
>HPV17\_Beta\_396932\_nt6145\_L1\_VE|1  
ACTGATGATAGACAAAACACGTCAATTTGACCCTAACAAGTGCAGATGTTTGTGTAGGC  
>HPV63\_Mu\_9626605\_nt6752\_L1\_VE|2  
TCGGAGCAGCTTGATCAATTTCTTTAGGCCGCAAATTTTTGTATCAAAGTGGTCTTGCA  
>HPV3\_Alpha\_397005\_nt5818\_L1\_VE|1  
AGCACGGACGACTATGTGACACGCACCAACATTTATTATTATGCAGGCAGTTCTCGCTTG  
>HPV4\_Gamma\_9626597\_nt5466\_L1\_VE|1  
GAAAGGCTTTTAACTGTAGGCCATCCTATTTTCCAGTGAAAGATGTACAGGAACCTCAC  
>HPV12\_Beta\_396910\_nt6805\_L1\_VE|1  
AGGCCCTTCTGGCTTCAAAGAGCACAGGGTCATAAATGGCATCCTGTGGGCTAATCAG  
>HPV37\_Beta\_1020226\_nt6467\_L1\_VE|1  
GCTAGGAGAGAACAATGTTATGCCAGACATTATTTTGTAAAGAGGGGAAATGTAGGTGAT  
>HPV48\_Gamma\_9628542\_nt5773\_L1\_VE|1  
GTTATTCAGGATGGTGATATGGGAGATATAGGCTTTGGGGCTGCTAATTTTCCTAAGTTG

>HPV28\_Alpha\_1020202\_nt6671\_L1\_VE|1  
TATTGGCTGCGGCGTGCTCAGGGACACAATAATGGTATCTGTTGGGCCAACCAATTGTTT  
>HPV66\_Alpha\_1020290\_nt6578\_L1\_VE|1  
TGGTTGCAACGTGCACAGGGCCATAATAATGGCATATGCTGGGGTAATCAGGTATTTGTT  
>HPV4\_Gamma\_9626597\_nt5436\_L1\_VE|1  
GGAACATCTCTGTATTTCCACGCTGGTACAGAAAGGCTTTTAACTGTAGGCCATCCTTAT  
>HPV54\_Alpha\_9628437\_nt6515\_L1\_VE|1  
TTTAATAAGCCATACTGGTTACAACGGGCCCAGGGTCAAAACAATGGTATTTGTTGGGGC  
>HPV39\_Alpha\_333245\_nt6574\_L1\_VE|1  
TGGCTACATAAGGCCCAGGGCCACAACAATGGTATATGTTGGCATAATCAATTATTTCTT  
>HPV22\_Beta\_1020178\_nt6623\_L1\_VE|1  
CGCGCGCAGGGCCATAATAATGGTATTTTGTGGAACAACCAAATGTTTGTAAACAGTAGCT  
>HPV67\_Alpha\_3228267\_nt5650\_L1\_VE|1  
TACCTGCCTCCTGTGCCTGTATCTAAGGTTGTAAGCACTGATGAATATGTGTCACGCACA  
>HPV61\_Alpha\_9628574\_nt6665\_L1\_VE|1  
GTGTCTCTGTATTCCCAATTATTTAATAAGCCATATTGGCTGCAACGTGCCCAGGGCCAC  
>HPV84\_Alpha\_12958167\_nt6566\_L1\_VE|1  
TCTATGGTGTCTCGGATTCCCAATTGTTTAAATAAGCCATACTGGTTGCAAAAGGCCAG  
>HPVcand62\_Alpha\_39932599\_nt6438\_L1\_VE|1  
TTGGATATATGCACCTCCACATGTAAATATCTTGACTATTTGCAAATGGCTGCAGAACCT  
>HPV101\_Unclassified\_109390389\_nt5638\_L1\_VE|1  
TGTGATATTGGCTTTGGTGCCATGAATTTTGCTGCCTTGCAGGCTGATCACTCAGGGGTA  
>HPV39\_Alpha\_333245\_nt6544\_L1\_VE|1  
TCTGATTCCCAAGTTATTTAATAAGCCTTATTGGCTACATAAGGCCCAGGGCCACAACAAT  
>HPV111\_Beta\_186461202\_nt6553\_L1\_VE|1  
TCAGATGCGCAGCTATTTAATAGACCATTTTGGTTGCAACGTGCACAAGGCCACAACAAT  
>HPV68a\_Alpha\_71726685\_nt5669\_L1\_VE|1  
GGCATTCCCTAAGGTGTCTGCATATCAATACAGAGTGTTTAGGGTTACCTTACCTGATCCT  
>HPV90\_Alpha\_22138122\_nt6753\_L1\_VE|1  
GGCCCTAACCAATGGTATCTGCTGGGGTAATCAGCTTTTTTGTAACTGTGGTTGATACTACA  
>HPV61\_Alpha\_9628574\_nt5765\_L1\_VE|1  
ATGGCTTTGTGGCGGCCTGGTGACGGCAAGGTATACCTGCCTCCCCTCCTGTGTCTAAA  
>HPV7\_Alpha\_9627389\_nt6549\_L1\_VE|1  
GAACAAATGTTTGTAGGCACTTTTTTAATAGGGCAGGAAGTACTGGAGACAGTGTTCCT  
>HPV93\_Beta\_37089393\_nt6391\_L1\_VE|1  
TTTGCTCGCAGAGAGCAATGTTATGCCAGACACTTTTTTTGTAAAGAGGTGGCAACGTAGGA  
>HPV34\_Alpha\_9627334\_nt5761\_L1\_VE|1  
CCAGATGCATCTTTTTATAATCCTGACAAGGAGCGGTTGGTTTGGGCCTGTGCAGGCGTT  
>HPV101\_Unclassified\_109390389\_nt6358\_L1\_VE|1  
GCAGAGCCTCCTAAGGAAAAGGAAGATCCATATGACAAAATGTCTTTTTGGGTGGTTGAT  
>HPV51\_Alpha\_333087\_nt6092\_L1\_VE|1  
TCCTCTGTCAATCAGGATGGCGATATGATTGATACAGGGTTTGGAGCTATGGATTTTCGCT  
>HPV72\_Alpha\_1491683\_nt5764\_L1\_VE|1  
AACGTGTGCCCTATTCTTTTGCAGATGGCTTTGTGGCGGCCTGGTGACGGCAAGGTATAC  
>HPV41\_Nu\_9626041\_nt6507\_L1\_VE|1  
CCCTTTTGGCTGCAGAGATCCCAGGGCCATAACAATGGCATACTGTGGCACAACGAGGCC  
>HPV26\_Alpha\_9627305\_nt5589\_L1\_VE|1  
ATGGCTTTGTGGCGTACTAGTGACAGCAAGGTATATCTTCTCCCACCCCTGTGTCTCGG  
>HPV11\_Alpha\_333026\_nt6342\_L1\_VE|1  
GTTATACAGGATGGGGACATGGTTGATACAGGCTTTGGTGCTATGAATTTTGCAGACTTA  
>HPV6\_Alpha\_6002612\_nt6721\_L1\_VE|1  
AAAGCCCAGGGACATAACAATGGTATTTGTTGGGGTAATCAACTGTTTGTACTGTGGTA  
>HPV57\_Alpha\_60882\_nt5734\_L1\_VE|1  
TGCATATTTCTTTGCAGATGGCTATGTGGCGGCCTAATGAAAGCAAGGTATACCTGCCT  
>HPV110\_Beta\_186461194\_nt6007\_L1\_VE|1

GGGCAACCTTTAGGGGTAGGTACCAGTGGTCATCCCTTATTTAATAAAGTTAGAGATACT  
>HPV73\_Alpha\_1491692\_nt6185\_L1\_VE|1  
GATTATTTAGGCATGGCTGCTGATCCCTATGGTGATTCCATGTGGTTTTATCTTCGTAGG  
>HPV83\_Alpha\_5059324\_nt6313\_L1\_VE|1  
GTAAATTCTACTATACAGGATGGCGACATGGTGGAACAGGCTATGGTGCCATGGATTTT  
>HPV52\_Alpha\_397038\_nt6616\_L1\_VE|1  
AATAATGGCATATGTTGGGGCAATCAGTTGTTTGTACAGTTGTGGATACCACTCGTAGC  
>HPV110\_Beta\_186461194\_nt5887\_L1\_VE|1  
TACAGAGCATTCGGGTGCAATTGCCTGATCCCTAATAGGTTTGCATTAGCAGACATGTCT  
>HPV3\_Alpha\_397005\_nt6688\_L1\_VE|1  
TATTGGCTGCGGCGTGCTCAGGGACACAATAATGGTATATGTTGGGCCAACCAATTGTTT  
>HPVFA75/KI88-03\_Unclassified\_206902429\_nt6101\_L1\_VE|1  
TGTACACCATGTTTAGGAGAATACTGGGATAAAGCTGAGCCATGTGAAAATGCAGGAGAT  
>HPV43\_Alpha\_40804474\_nt5818\_L1\_VE|1  
GTGAGCACAGATGAATATGTGCAACGCACCAACTTATTTTATTATGCTGGCAGTTCACGT  
>HPV9\_Beta\_9627396\_nt6496\_L1\_VE|1  
GCAAGAAGAGAACAATGTTATGCCAGGCATTATTATGTTAGAGGAGGTTCA GTTGGTGAC  
>HPV38\_Beta\_1020234\_nt5782\_L1\_VE|1  
GATCGCCTATTAACAGTAGGCCATCCATATTTTGATGTCAGATCACAGGATGGTCAAAAA  
>HPV103\_Unclassified\_109390382\_nt5846\_L1\_VE|2  
TACTATGCAACCCCCAGTGGATCACTGGTTTCTAGTGATTCTCAGTTGTTTGGCAGACCA  
>HPV44\_Alpha\_1020242\_nt6625\_L1\_VE|1  
AAGGCGCAGGGCCACAATAATGGTATTTGTTGGGGAAATCAGTTATTTGTTACTGTTGTA  
>HPV56\_Alpha\_397053\_nt6513\_L1\_VE|1  
TTTAATAAACCTTATTGGTTGCAACGTGCCCAAGGCCATAATAATGGCATTGCTGGGGT  
>HPV53\_Alpha\_9627377\_nt5656\_L1\_VE|1  
ATGGCGGTGTGGCGGCCTAGTGACAGCAAGGTTTATCTGCCTCCTACCCCTGTATCAAAG  
>HPV60\_Gamma\_9628566\_nt6686\_L1\_VE|2  
ATGTCTCAGGCAACAATGTGTCCAACAGATGTTCTAATACTGAAAGGGAAGACCCTTAT  
>HPV68a\_Alpha\_71726685\_nt6389\_L1\_VE|1  
TCCTCTGACTCCCAGTTATTTAACAAGCCCTATTGGCTGCACAAGGCACAGGGACACAAC  
>HPV14D\_Beta\_396918\_nt6504\_L1\_VE|1  
GGCAATGCCATGTATTTCCCAACTGTCAGTGGCTCATTGGTATCCAGTGATGCTCAACTG  
>HPV38\_Beta\_1020234\_nt5692\_L1\_VE|1  
ATATACTTGCCACCAACACCTCCAGTTGCGCGCGTTCAAAGCACGGATGAATATGTGGAA  
>HPV23\_Beta\_1020186\_nt5781\_L1\_VE|1  
GATCGATTACTAACTGTAGGCCACCCATATTTTGATGTTAGATCACCGGATGGTAGTAAA  
>HPV35\_Alpha\_333050\_nt6475\_L1\_VE|1  
GTAACCTCCGATGCACAAATATTTAATAAACCATATTGGTTGCAACGTGCACAAGGCCAT  
>HPV39\_Alpha\_333245\_nt6064\_L1\_VE|1  
GACAGTAGGGATAATGTGTCTGTGGATTATAAACAGACACAGTTGTGCATTATAGGCTGT  
>HPV31\_Alpha\_333048\_nt6543\_L1\_VE|1  
TTTGTTACTGTGGTAGATACCACACGTAGTACCAATATGTCTGTTTGTGCTGCAATTGCA  
>HPV59\_Alpha\_557236\_nt6057\_L1\_VE|1  
TATAAACAAACTCAGCTGTGTATTATTGGCTGTGTACCTGCCATTGGAGAACACTGGACA  
>HPV60\_Gamma\_9628566\_nt6266\_L1\_VE|2  
CTTGGTGGTTATAGTTACTTCCCTACACCAAGTGGTTCTGTAGCTTCTAGTGATAATCAA  
>HPV54\_Alpha\_9628437\_nt6545\_L1\_VE|1  
CAGGGTCAAAACAATGGTATTTGTTGGGGCAATCAGGTGTTTTTAACAGTTGTAGATACC  
>HPV74\_Alpha\_27462483\_nt6174\_L1\_VE|1  
GGTGATATGGTAGATACAGGCTTTGGTGCCATGAATTTTGCTGAATTGCAGCCTCTTAAA  
>HPV65\_Gamma\_312100\_nt5777\_L1\_VE|1  
GATCCAAAACAGACACAAATGTTTATCATAGGTTGCACTCCTGCTATTGGGGAACATTGG  
>HPV51\_Alpha\_333087\_nt6452\_L1\_VE|1  
TATTGGCTCCACCGTGCGCAGGGTCACAATAATGGCATTGCTGGAACAATCAGCTTTTT



>HPV40\_Alpha\_397014\_nt5960\_L1\_VE|1  
CCTAAGGTTTCTGGACATCAATACAGGGTATTTAGGGTACGTTTGCCTGACCCGAATAAG  
>HPV23\_Beta\_1020186\_nt6621\_L1\_VE|1  
CGTGCTCAAGGCCATAACAATGGTATTTTATGGAACAACCAGATGTTTGTGACTGTAGCA  
>HPV3\_Alpha\_397005\_nt6718\_L1\_VE|1  
AATGGTATATGTTGGGCCAACCAATTGTTTGTGACTGTGGTGGATACCACACGTAGTACT  
>HPV37\_Beta\_1020226\_nt5747\_L1\_VE|1  
GTATACTTGCCCTCCAACACCACCAGTAGCCCGGGTGCAAAGCACGGATGATTATGTGGAA  
>HPV111\_Beta\_186461202\_nt6343\_L1\_VE|1  
GTCTATGGGGACGCTTGTTTCTTTTTTGCCAGAAGGGAGCAATGTTATGCCAGACATTAC  
>HPV25\_Beta\_396948\_nt6790\_L1\_VE|1  
AACTCAATGTATTTCCCAACAGTCAGTGGCTCATTTGGTATCCAGTGATGCTCAATTATTC  
>HPV21\_Beta\_1020170\_nt5960\_L1\_VE|1  
GTTTACCTTCCACCGTCTACACCAGTTGCCAGGGTCCAAAGCACGGATGAATATGTACAA  
>HPV103\_Unclassified\_109390382\_nt5486\_L1\_VE|1  
GATATGGGTGCATGTCCTCCTTTAGAGCTTGTTAGTTCCATTATTGAGGATGGGGATATG  
>HPV60\_Gamma\_9628566\_nt6236\_L1\_VE|2  
GCACCACAACTGATAAACCTCAAAATAACCTTGGTGGTTATAGTTACTTCCCTACACCA  
>HPV26\_Alpha\_9627305\_nt6489\_L1\_VE|1  
ACTTCGGATGCACAACCTATTTAATAAGCCATACCTGGTTACAACGTGCACAGGGTCATAAT  
>HPV53\_Alpha\_9627377\_nt6556\_L1\_VE|1  
GAGGCTCAATTGTTTAATAAGCCATATTGGCTGCAACGTGCCCAGGGACATAATAATGGC  
>HPV1\_Mu\_9626063\_nt5714\_L1\_VE|1  
AGATTAGTTTGGGGCCTAAGAGGGATAGAGATAGGTAGAGGCCAGCCTTTAGGTATAGGA  
>HPV40\_Alpha\_397014\_nt6350\_L1\_VE|1  
GAGGTTATTTCAGGATGGCGACATGGTGGATACTGGCTTTGGTGCTATGGATTTTGCTTCC  
>HPV51\_Alpha\_333087\_nt5972\_L1\_VE|1  
AAACAGACTCAGTTATGTATAATAGGCTGTGCTCCACCTATTGGGGAACACTGGGGTATT  
>HPV1\_Mu\_9626063\_nt5984\_L1\_VE|1  
AGGGTGCAAATGATAGAGTCTGTGCATAGAAGATGGTGACATGATGGATATTGGTTTTGGG  
>HPV40\_Alpha\_397014\_nt6380\_L1\_VE|1  
ACTGGCTTTGGTGCTATGGATTTTGCTTCTTGCAGGCCAATAAAAGTGATGTGCCATTG  
>HPV25\_Beta\_396948\_nt6820\_L1\_VE|1  
TCATTGGTATCCAGTGATGCTCAATTATTCAATAGGCCATTTTGGTTACAGCGAGCACAA  
>HPV56\_Alpha\_397053\_nt6483\_L1\_VE|1  
GGGTCTATGATTACGTCTGAGGCACAGTTATTTAATAAACCTTATTGGTTGCAACGTGCC  
>HPV65\_Gamma\_312100\_nt5807\_L1\_VE|1  
GGTTGCACTCCTGCTATTGGGGAACATTGGGATAAGGCTGAGCCTTGTGCAAGTCCTGTT  
>HPVcand87\_Alpha\_14475578\_nt6443\_L1\_VE|1  
GTTTGCAAGTATCCTGACTATTTGCAAATGGCTGCTGAGCCCTATGGCGATTGCATGTTT  
>HPV48\_Gamma\_9628542\_nt6133\_L1\_VE|1  
TTATTTAATAGGCCTTATTGGCTTAGACGAGCCAGGGAACAAATAATGGCATTGTGTTGG  
>HPV92\_Beta\_27531786\_nt6869\_L1\_VE|1  
TTGGAGGACTGGCAGTTAGGATTTGTTCTTACTCCAGATAACCCTATTCAGGATGCATAC  
>HPV58\_Alpha\_222386\_nt6226\_L1\_VE|1  
ATTGAGGATGGTGACATGGTAGATACAGGGTTTGGATGCATGGACTTTGGTACATTGCAG  
>HPV54\_Alpha\_9628437\_nt6275\_L1\_VE|1  
GCTACCTCAATTTGTAAATATCCTGATTACCTTAAATGGCTGCAGAGGCATATGGGGAC  
>HPV10\_Alpha\_9627257\_nt6730\_L1\_VE|1  
GCTCAATTGTTTAATAAGCCATATTGGCTGCGGCGGGCCAGGGGCACAACAATGGTATA  
>HPV80\_Beta\_2911565\_nt6469\_L1\_VE|1  
GCAAGACGAGAGCAATGTTATGCTAGACATTATTTTGTAGAGGAGGTGCAGTAGGCGAT  
>HPV92\_Beta\_27531786\_nt5969\_L1\_VE|1  
CGAGGGCAGCCTTTAGGTGTTGGCACACAGGTCATCCATTATTTAATAAGGTATTGGAC  
>HPV33\_Alpha\_333049\_nt6345\_L1\_VE|1

CGACGTGAACAAATGTTTGTAAAGACACTTTTTTAATAGGGCTGGTACATTAGGAGAGGCT  
>HPV10\_Alpha\_9627257\_nt6700\_L1\_VE|1  
ACACCCAGTGGGTCCATGGTAACGTCTGAGGCTCAATTGTTTAATAAGCCATATTGGCTG  
>HPV38\_Beta\_1020234\_nt6112\_L1\_VE|1  
CCTAAACAGGTGCAAATGTTTATAATAGGCTGCACTCCTTGTCTAGGAGAATACTGGGAT  
>HPV66\_Alpha\_1020290\_nt5648\_L1\_VE|1  
ATGGCGATGTGGCGGCCTAGTGACAATAAGGTGTACCTACCTCCAACACCTGTTTCAAAG  
>HPV30\_Alpha\_396973\_nt6562\_L1\_VE|1  
GCTCAGTTGTTTAATAAACCTTACTGGTTGCAACGCGCACAGGGACACAATAATGGCATT  
>HPV32\_Alpha\_9627327\_nt6803\_L1\_VE|1  
TATTGGTTACAGCAGGCACAAGGCCACAATAATGGTATATGTTGGGGTAATCAAGTGTTT  
>HPV2\_Alpha\_9626032\_nt6853\_L1\_VE|1  
AAGGAATATCTCAGGCATATGGAGGAATATGATTTGCAGTTCATCTTCCAACCTGTGCAAG  
>HPV16\_Alpha\_9627100\_nt6580\_L1\_VE|1  
CGAGCACAGGGCCACAATAATGGCATTGTTGGGGTAACCAACTATTTGTTACTGTTGTT  
>HPV5\_Beta\_9627145\_nt6668\_L1\_VE|1  
CGTAGGGAGCAATGTTATGCCAGACACTTTTTTGTAGAGGGGGAAAACTGGTGATGAC  
>HPV30\_Alpha\_396973\_nt6532\_L1\_VE|1  
ACTCCTAGTGGGTCTATGGTAACCTCTGAGGCTCAGTTGTTTAATAAACCTTACTGGTTG  
>HPV80\_Beta\_2911565\_nt6019\_L1\_VE|1  
TGGGCCTGTGCAGGCCTAGAAATAGGCAGAGGACAACCATTAGGTGTAGGCACATCAGGC  
>HPV90\_Alpha\_22138122\_nt5973\_L1\_VE|1  
ATAGTGGTTCCCAAGGTGTCTGGATATCAATATAGGGTGTTTAGGGTACGTTTGCCTGAT  
>HPV50\_Gamma\_9628550\_nt5532\_L1\_VE|1  
CTAGTAGGTATAGAAGTCGGGAGAGGTGGGCCTTTAGGTGTTGGATCTACTGGTCATCCC  
>HPV111\_Beta\_186461202\_nt6373\_L1\_VE|1  
AGAAGGGAGCAATGTTATGCCAGACATTACTTTGTTAGAGGAGGCAATGTAGGAGATGCA  
>HPV29\_Alpha\_1020210\_nt5874\_L1\_VE|1  
GTTATCAGCACGGACGACTATGTGACACGCACAAATATTTATTATTATGCAGGCAGTTCT  
>HPV23\_Beta\_1020186\_nt5721\_L1\_VE|1  
CGAGTGCAGAGTACGGATGAATATGTGGAAGAAGTACATCTATTACCATGCAACTAGT  
>HPV42\_Alpha\_333211\_nt5817\_L1\_VE|1  
CTGTACCATATTTTTTTGCAGATGTCCGTGTGGCGGCCTAGTGACAACAAGGTTTATCTA  
>HPV96\_Beta\_50253426\_nt6817\_L1\_VE|1  
CCTTTTTGGCTGCAAAGGGCTCAAGGCCATAATAATGGTATTTGCTGGGGTAATCAAATC  
>HPV33\_Alpha\_333049\_nt5925\_L1\_VE|1  
GGGCAGCCATTAGGCGTTGGCATAAGTGGTCATCCTTTATTAAACAAATTTGATGACACT  
>HPV13\_Alpha\_85827580\_nt6043\_L1\_VE|1  
GGTTTAGAGGTTGGTAGGGGTCAACCTTAGGTGTTGGTATTAGTGGTCATCCATTATTA  
>HPV69\_Alpha\_6970418\_nt6502\_L1\_VE|1  
AATAATGGCATTGTTGGGGCAACCAATTGTTTGTACTTGTGTAGATACTACCCGCAGT  
>HPV15\_Beta\_396924\_nt5734\_L1\_VE|1  
GTATATTTGCCACCAACACCACCTGTAGCACGTGTACAAAGCACCGATGAATATGTGGAG  
>HPV4\_Gamma\_9626597\_nt5796\_L1\_VE|1  
GACCCAAAACAAACACAGATGTTTATTATAGGTTGCACTCCTGCAATAGGTGAACATTGG  
>HPV69\_Alpha\_6970418\_nt6442\_L1\_VE|1  
GTGACCTCTGATGCTCAATTGTTTAATAAACCTTACTGGTTACAGCGTGCCAGGGTCAT  
>HPV33\_Alpha\_333049\_nt5625\_L1\_VE|1  
GTGTACCTGCCTCCTGTACCTGTATCTAAAGTTGTGTCAGCACTGATGAATATGTGTCTCGC  
>HPV23\_Beta\_1020186\_nt6891\_L1\_VE|1  
GGGTTTGTTCCTACACCAGATAATGCAGTTCATGACACATACAGATATTTGGCTTCAAAG  
>HPV27\_Alpha\_396964\_nt6668\_L1\_VE|1  
TTGTTTAATAAGCCCTACTGGCTACGGAGGGCCAGGGACATAATAATGGTATGTGCTGG  
>HPV55\_Alpha\_1020266\_nt6625\_L1\_VE|1  
AGGGCGCAGGGCCACAATAATGGTATTTGTTGGGGGAATCAGTTATTTGTTACTGTTGTA

>HPV61\_Alpha\_9628574\_nt6635\_L1\_VE|1  
ATTTATTCCCTACGCCTAGTGGCTCTATGGTGTCTCTGATTCCCAATTATTTAATAAG  
>HPV88\_Gamma\_167600365\_nt6721\_L1\_VE|1  
TTTAGCTTAGGTGCGAAATTTTGTTCAAAGTGGTTTGCTGCCCACAAAACGTGTCAGG  
>HPV14D\_Beta\_396918\_nt6564\_L1\_VE|1  
TTCAATAGACCATTTTGGTTACAGCGCGCACAAAGGCCACAATAATGGTATTTGTTGGTTT  
>HPV102\_Alpha\_71726718\_nt6464\_L1\_VE|1  
GGTATTTGTAAATATCCTGATTATTTACAAATGGCGGCTGAGCCCTACGGAGACTGTATG  
>HPVcand62\_Alpha\_39932599\_nt6708\_L1\_VE|1  
CCATATTGGCTGCAGCGGGCGCAGGGCCATAATAATGGTATTTGTTGGTTTAATGAACTG  
>HPV32\_Alpha\_9627327\_nt6173\_L1\_VE|1  
TGTGTGGGTTTGGAGGTTGGCCGTGGACAGCCTTTAGGTGTTGGTCTTAGTGGGCATCCT  
>HPV21\_Beta\_1020170\_nt6860\_L1\_VE|1  
GGCTCATTGGTGTCTAGTGACGCTCAATTGTTTAACAGGCCATTTTGGCTACAGCGTGCA  
>HPV102\_Alpha\_71726718\_nt6734\_L1\_VE|1  
CGGGCCCAGGGACACAATAATGGCATTGTTGGTTTAATGAGGTATTTGTAACAGTTGTA  
>HPV1\_Mu\_9626063\_nt6374\_L1\_VE|2  
CAGCGATGTCAAGGCCAGAATAATGGCATTGCTGGAGAAACCAGTTATTTATTACAGTT  
>HPV16\_Alpha\_9627100\_nt6220\_L1\_VE|1  
ATTCAGGATGGTGATATGGTTTCATACTGGCTTTGGTGCTATGGACTTTACTACATTACAG  
>HPV18\_Alpha\_9626069\_nt5941\_L1\_VE|1  
GGTCAGCCTTTAGGTGTTGGCCTTAGTGGGCATCCATTTTATAATAAATTAGATGACACT  
>HPV107\_Beta\_126131393\_nt5789\_L1\_VE|1  
ATGTCTTTGTGGCTTCCTGCAACTGGTAAAGTATATTTGCCACCATCAACTCCGGTGGCA  
>HPV50\_Gamma\_9628550\_nt6192\_L1\_VE|1  
ATTCGAGAGCTCAGGGTACGAACAATTGTATTTGTTGGGGTAATGAGGTATTTGTTACA  
>HPV66\_Alpha\_1020290\_nt5858\_L1\_VE|1  
GTGTTTAGGGTACGGTTGCCTGATCCTAATAAGTTTGGCCTTCCTGATCCATCTTTCTAT  
>HPV57\_Alpha\_60882\_nt6664\_L1\_VE|1  
AAGCCTTACTGGCTGCGGAGGGCCAGGGACATAACAATGGCATGTGCTGGGGCAATCGG  
>HPV50\_Gamma\_9628550\_nt5262\_L1\_VE|1  
TTATACCTTCCACCAAGTACTCCTGTTGCCAGAGTTTTAAGCACCGATGAATATGTGAAA  
>HPV97\_Alpha\_71726694\_nt6437\_L1\_VE|1  
AGGGCCCAGGGCCATAACAATGGTATTTGTTGGCATAATCAATTATTTGTTACTGTGGTG  
>HPV26\_Alpha\_9627305\_nt6519\_L1\_VE|1  
TACTGGTTACAACGTGCACAGGGTCATAATAATGGTATCTGTTGGGGCAATCAATTGTTT  
>HPV82\_Alpha\_6970427\_nt6502\_L1\_VE|1  
TATTGGTTGCATCGCGCCAGGGCCACAATAATGGCATTGCTGGAATAATCAGCTTTTT  
>HPV75\_Beta\_2911544\_nt5802\_L1\_VE|1  
AAGGTTTATCTTCCACCATCAACACCTGTGGCCAGGGTGCAAAGCACGGATGAATACATT  
>HPV32\_Alpha\_9627327\_nt5873\_L1\_VE|1  
ATGTCCGTGTGGCGGCCTAGTGACAACAAGGTTTATCTGCCTCCTCCTGTTTCCAAG  
>HPV74\_Alpha\_27462483\_nt6504\_L1\_VE|1  
AAGCCCTTTTGGCTACAAAAGGCGCAAGGCCACAATAATGGCATTGTTGGGGTAATCAA  
>HPV106\_Alpha\_71726710\_nt6200\_L1\_VE|1  
CCTGGGGACGACAACCGGGACAATATGTCCATGGATTATAAACAACTCAGTTATGTATT  
>HPV35\_Alpha\_333050\_nt6505\_L1\_VE|1  
CCATATTGGTTGCAACGTGCACAAGGCCATAATAATGGTATTTGTTGGAGTAACCAATTG  
>HPV73\_Alpha\_1491692\_nt6365\_L1\_VE|1  
CCTACACCTAGTGGTTCCATGGTTTCTTCAGATGCACAGTTGTTTAATAAACCTTATTGG  
>HPV88\_Gamma\_167600365\_nt5641\_L1\_VE|1  
AGAGGTGGACCCTAAATGTAGGTACTGCAGGTCATCCTTTATTTAACAAAGCTCCAGAT  
>HPV29\_Alpha\_1020210\_nt6714\_L1\_VE|1  
ACGTCTGAGGCTCAAATATTTAATAAGCCTTACTGGCTACAGCAGGCCCGGGACACAAC  
>HPV63\_Mu\_9626605\_nt5432\_L1\_VE|3

ATTCTAAGCAGCGATGATTATGTGTCTCGCACCAACATCTTCTATCACGCTACCAGTGAT  
>HPV63\_Mu\_9626605\_nt6032\_L1\_VE|2  
GCTCCTTTGGATATTGCAGGCACTGTCTGCAAATATCCAGATTATATTAAATGGGACAG  
>HPV111\_Beta\_186461202\_nt5653\_L1\_VE|1  
GTATATTTGCCACCATCTACACCAGTGGCTCGCGTACAAAGCACCGATGAATATGTGGAA  
>HPV106\_Alpha\_71726710\_nt6740\_L1\_VE|1  
CAGGGCCGAAACAATGGTATCTGCTGGGGCAATCAGGTATTTGTCACTGTGGTAGATACC  
>HPV18\_Alpha\_9626069\_nt6511\_L1\_VE|1  
GTTACCTCTGACTCCCAGTTGTTTAATAAACCATATTGGTTACATAAGGCACAGGGTCAT  
>HPV16\_Alpha\_9627100\_nt5920\_L1\_VE|1  
ACACAGCGGCTGGTTTGGGCCTGTGTAGGTGTTGAGGTAGGTCTGGTCAGCCATTAGGT  
>HPV19\_Beta\_396940\_nt5895\_L1\_VE|1  
TACCTTCCACCATCTACACCAGTTGCCAGGGTACAAAGCACGGATGAATATGTTCAAAGG  
>HPV9\_Beta\_9627396\_nt6046\_L1\_VE|1  
TGGGCCTGTAGAGGTATTGAAATAGGCAGAGGACAACCTTTAGGGGTGGAACATCAGGT  
>HPV29\_Alpha\_1020210\_nt6384\_L1\_VE|1  
ATGACCACACATATTGAGGATGGCGATATGGTGGATACCGGGTACGGTGCCATGGACTTT  
>HPV107\_Beta\_126131393\_nt6029\_L1\_VE|1  
CCCAATCGATTTGCATTAGCAGACATGTCTAGTATACAATCCTGACAAGGAAAGGCTGGTA  
>HPV7\_Alpha\_9627389\_nt6369\_L1\_VE|1  
GAAGTTATTGAGGATGGCGCATGGTTGATGCAGGCTTTGGTGCCATGGATTTTGCATCA  
>HPV11\_Alpha\_333026\_nt6732\_L1\_VE|1  
TGCTGGGGAAACCACCTTGTTTGTACTGTGGTAGATACCACACGCAGTACAAATATGACA  
>HPV25\_Beta\_396948\_nt5920\_L1\_VE|1  
GTGTACCTTCCACCATCTACACCTGTTGCCAGGGTACAAAGCACGGATGAATATGTGCAA  
>HPV24\_Unclassified\_9628486\_nt6614\_L1\_VE|1  
GGCAACTCAATGTATTTCCCAACAGTCAGTGGCTCATTGGTATCTAGTGATGCTCAATTA  
>HPV54\_Alpha\_9628437\_nt5615\_L1\_VE|1  
ATGTGGCGGCCTAGCGAAAACAAAGTATACCTGCCTCCTACCCAGTTTCTAAGGTTGTC  
>HPV11\_Alpha\_333026\_nt6192\_L1\_VE|1  
AGGGTTAATGTAGGTATGGATTATAAACAAACCCAGCTATGTATGGTGGGCTGTGCTCCA  
>HPV1\_Mu\_9626063\_nt6614\_L1\_VE|1  
GACCCTAATATTTTAGAGGATTGGCAACTATCTGTATCTCAACCACCTACCAATCCTCTA  
>HPV70\_Alpha\_1173493\_nt6011\_L1\_VE|1  
CAGGACAGTAGGGACAATGTGTCTGTGGACTATAAGCAAACACAGTTATGTATTATAGGC  
>HPV39\_Alpha\_333245\_nt6214\_L1\_VE|1  
AACACCCCTATTGAGGATGGTGATATGATTGATACTGGCTATGGAGCTATGGACTTTGGT  
>HPV101\_Unclassified\_109390389\_nt5578\_L1\_VE|1  
CCTAAAGGCACCTGTCCTCCTTTACAGTTGGTGTCTCTGTTATTCAGGATGGGGATATG  
>HPV31\_Alpha\_333048\_nt5853\_L1\_VE|1  
TGGGCCTGTGTTGGTTTAGAGGTAGGTCTCGCGGCAGCCATTAGGTGTAGGTATTAGTGGT  
>HPV44\_Alpha\_1020242\_nt5995\_L1\_VE|1  
GGGCTGGAGGTAGGTAGAGGACAGCCCTTAGGTGTTGGTATTAGTGGGCATCCATTATTA  
>HPV23\_Beta\_1020186\_nt5871\_L1\_VE|1  
TTCAGGGCCTTTAGAGTTACATTTCCAGACCCTAATAAGTTTGCATTAGCAGACATGACT  
>HPV15\_Beta\_396924\_nt6004\_L1\_VE|1  
TGGGCCTGTGTAGGCCTTGAAATAGGTAGAGGACAACCATTAGGAGTTGGTACTTCAGGC  
>HPV101\_Unclassified\_109390389\_nt6148\_L1\_VE|2  
AAGCACTACCTCAGACATGTGGAGGAATTTGAAATTTCTCTCATTGTGCAGCTCTGTAAA  
>HPV22\_Beta\_1020178\_nt5963\_L1\_VE|1  
TGGGCTTGTAAGGGTTAGAAATAGGAAGGACAGCCCTTAGGTGTAGGTACCACAGGT  
>HPV6\_Alpha\_6002612\_nt6361\_L1\_VE|1  
ATACAGGATGGCGATATGGTTGACACAGGCTTTGGTGCTATGAATTTTGCTGATTTGCAG  
>HPV16\_Alpha\_9627100\_nt5950\_L1\_VE|1  
GTTGAGGTAGGTCTGGTCTAGCCATTAGGTGTGGGCATTAGTGGCCATCCTTTATTAAAT

>HPV63\_Mu\_9626605\_nt5822\_L1\_VE|1  
GATGCAAAACAAACCCAAATGTTTCTAATTGGCTGTACACCAGCCACTGGGGAACACTGG  
>HPV80\_Beta\_2911565\_nt5989\_L1\_VE|1  
GTTTATAATCCAGAAAAAGAAAGGTTGGTTTGGGCCTGTGCAGGCCTAGAAATAGGCAGA  
>HPVcand85\_Alpha\_4574720\_nt6511\_L1\_VE\_rc|1  
ATTTTGTCCCTGGGCTTTGTGCAGCCAATAAGGCTTATTAAACATTTGTGCATCTGAAGA  
>HPV88\_Gamma\_167600365\_nt5491\_L1\_VE\_rc|1  
AGGCAATTTTCAGCCTAAACACTCGATATTGGCATGCAGACACCTTAGGAATCTCAATTTT  
>HPV17\_Beta\_396932\_nt6955\_L1\_VE\_rc|1  
CCTATATATATCATGCACTGGGTATCTGGTGTAGGCACAAATCCTAACTGCCAGTCTTC  
>HPV60\_Gamma\_9628566\_nt5876\_L1\_VE\_rc|1  
AGGATCACAAGGTTTAGCAATATCCCAGTGTTACCAGTGGCTGGTTTACATCCTACAAT  
>HPV22\_Beta\_1020178\_nt6593\_L1\_VE\_rc|1  
CAAAATACCATTATTATGGCCCTGCGCGCGCTTCAACCAAAAAGGCTGTTGAATAGTTG  
>HPV73\_Alpha\_1491692\_nt6245\_L1\_VE\_rc|1  
TGGGATTTTATCACCGGTATCACAGCCCTGTAAATAAGTGTGCAACAAACATTTGTTC  
>HPV13\_Alpha\_85827580\_nt6313\_L1\_VE\_rc|1  
CAATTCTCAAAATTCATGGCTCCAAATCCTGTATCTACCATGTCACCATCCTGAATTAC  
>HPV42\_Alpha\_333211\_nt5847\_L1\_VE\_rc|1  
GCTGACCACCTTGGAAACAGGAGGAGGTAGATAAACCTTGTGTCACTAGGCCGCCA  
>HPV95\_Gamma\_40804520\_nt6119\_L1\_VE\_rc|1  
ATCACCCATTGTCCAGCTCTAACAAAAAGTGTCTTGCATAAAGCTGTTCCCTTCGGCC  
>HPV3\_Alpha\_397005\_nt6328\_L1\_VE\_rc|1  
CAAGTTACCAAAGTCCATGGCACCATAACCTGTGTCCACCATATCGCCATCTTGTATAGG  
>HPVcand62\_Alpha\_39932599\_nt6678\_L1\_VE\_rc|1  
ATGGCCCTGCGCCCGCTGCAGCCAATATGGCTTATTAAACAACCTGAGAATCAGACGACAC  
>HPV48\_Gamma\_9628542\_nt5473\_L1\_VE\_rc|2  
ACCCCTCTGCCTACTTCCAAACCAACAAGTTTCCAAACTAAACGTTCCCTTATCTGAATT  
>HPV92\_Beta\_27531786\_nt5669\_L1\_VE\_rc|1  
TTGAACAAATTCATCCGTACTTTGTACCCTTGCAACCGGTGTTGAAGGGGTAAGTATAC  
>HPV81\_Alpha\_40804509\_nt6765\_L1\_VE\_rc|1  
ATTATGGCCCTGTGCGCGTTGTAGCCAATAAGGCTTATTAAACAGCTGGGAATCAGAGGA  
>HPV63\_Mu\_9626605\_nt5672\_L1\_VE\_rc|2  
ATTGCCTGAAATACCCACACCTAATGGTTGACCCCTACCGATTTCTATGCCTCTAAGACC  
>HPV20\_Beta\_1020162\_nt6824\_L1\_VE\_rc|1  
GCCCTGTGCGCGCTGCAGCCAAATGGCCTATTAAACAATTGAGCATCACTAGACACCAA  
>HPV37\_Beta\_1020226\_nt5897\_L1\_VE\_rc|1  
ATCTGGCAACCTAACCCTAAAAGCTCTGTATTGATTTCCAGATACTTTAGGAACCTCGAT  
>HPV36\_Beta\_1020218\_nt6792\_L1\_VE\_rc|1  
GTTAAACAATTGAGCATCACTAGACACCAATGAGCCACTAACAGTTGGGTAATACATGGC  
>HPV95\_Gamma\_40804520\_nt5489\_L1\_VE\_rc|1  
CTTAGGTTACCTACATCTTTCACTGGGAAATAAGGATGGCCTACAGTTAAAAGTCTTTC  
>HPV84\_Alpha\_12958167\_nt6086\_L1\_VE\_rc|1  
TAACAGCTGTGTTTGTTTATAATCCACAGAAACATTATCCCTACTGTGTCAGTGTCCCCAGC  
>HPV40\_Alpha\_397014\_nt6530\_L1\_VE\_rc|1  
TGGGACACTATCACCAGTAGTACCTGCCCTATTAAAAAAGTGCCTAACAAACATTTGTTC  
>HPVFA75/KI88-03\_Unclassified\_206902429\_nt5621\_L1\_VE\_rc|1  
AGCTACTGGAGTTGATGGTGGCAAATATACCTTACCCTTGACAGGAAGCCAGAGAGACAT  
>HPV56\_Alpha\_397053\_nt5793\_L1\_VE\_rc|1  
TGGAAGCCCCAACTTATTAGGGTCGGGCAACCGTACCCTAAATACCTTATATTGATATGC  
>HPVFA75/KI88-03\_Unclassified\_206902429\_nt6371\_L1\_VE\_rc|1  
AGCGTCTCCAACATTACCTCCTCTGGTAAAAATAATGTCTTGCATAGCACTGTTCCCTTCT  
>HPV73\_Alpha\_1491692\_nt6065\_L1\_VE\_rc|1  
AGCTTTAAAAATCCATGGCTCCAAAGCCAACATCTATCATATCACCATCCTGTATAGGGGT  
>HPV59\_Alpha\_557236\_nt5697\_L1\_VE\_rc|1

AAAATATGGATGTCCAACGTGAAGAAGTCTGGAAGTGCCTGCGTGGTAGAAAATACTGGT  
>HPV88\_Gamma\_167600365\_nt6061\_L1\_VE\_rc|1  
TCCCATTTTACCTTCACGAGCCATAAAATGGCGAGCATACGACTGCTCACGTTTTCCAAA  
>HPV52\_Alpha\_397038\_nt6586\_L1\_VE\_rc|1  
CAACTGATTGCCCCAACATATGCCATTATTGTGGCCCTGCGCACGTTGTAACCAGTACGG  
>HPV10\_Alpha\_9627257\_nt5860\_L1\_VE\_rc|1  
GTTGGTGCCTGTCACATAGTCGTCCGTGCTGAGAAGCTTTAGACACGGGAGTGGGAGGCAG  
>HPV33\_Alpha\_333049\_nt5805\_L1\_VE\_rc|1  
GGAGGTGTCAGGAAATCCAAATTTATTAGGATCTGGTAAACGGACCCCTAAAAACCCCTATA  
>HPV48\_Gamma\_9628542\_nt5533\_L1\_VE\_rc|1  
ATTTTCTGTGTCCCCTATCTTATTTAGTAAAGGATGACCTGTAGATCCTACGCCAAGAGG  
>HPV22\_Beta\_1020178\_nt6563\_L1\_VE\_rc|1  
CTTCAACCAAAAAGGCCTGTTGAATAGTTGGGCATCAGAGGTTACTAAAGAACCCTAAC  
>HPVcand85\_Alpha\_4574720\_nt5611\_L1\_VE\_rc|1  
TTTAGCCACTGAAGGTGGTGAAGGTATACCTTGCTGTCACTAGAACGCCACAAAGCCAT  
>HPV42\_Alpha\_333211\_nt5877\_L1\_VE\_rc|1  
GTAGTTGGTGCCTTGCACATATTCATCAGTGCTGACCACCTTGAAACAGGAGGAGGAGG  
>HPV81\_Alpha\_40804509\_nt6735\_L1\_VE\_rc|1  
AGGCTTATTAAACAGCTGGGAATCAGAGGATACCATAGACCCACTAGGTGTAGGGGCATA  
>HPV2\_Alpha\_9626032\_nt5773\_L1\_VE\_rc|1  
AGGTAGGTATACCTTGCTTTTCATTAGGCCGCCACAAAGCCATCTGCAAAGAAATAGTGGA  
>HPV90\_Alpha\_22138122\_nt6003\_L1\_VE\_rc|1  
CGATGCATCAGGAAGGCCAAACTTATTGGGATCAGGCAAACGTACCCCTAAACACCCCTATA  
>HPV26\_Alpha\_9627305\_nt6159\_L1\_VE\_rc|1  
AGTAAATCCATAGCTCCAAAGCCTGTATCAATCATATCGCCATCCTCAATAATGCTGGA  
>HPV33\_Alpha\_333049\_nt5655\_L1\_VE\_rc|1  
GGAAGTACCAGCATAATAATAAATGCTTGTGCGAGACACATATTCATCAGTGCTGACAAC  
>HPV106\_Alpha\_71726710\_nt5990\_L1\_VE\_rc|1  
TGCATCAGGAAGGCCAAATTTGTTGGGATCAGGCAAACGAACCCTAAATACCCTATATTG  
>HPV45\_Alpha\_397022\_nt6551\_L1\_VE\_rc|1  
AACAAACAAGTATTATGCCAACAAATACCATTGTTATGGCCCTGGGCCTTATGTAACCA  
>HPV41\_Nu\_9626041\_nt5667\_L1\_VE\_rc|2  
CACCTCTTTGCCATCCGCATTAGTAATATTGTAAAATGGATGTCCAACAGTAAGCAAACG  
>HPV33\_Alpha\_333049\_nt6555\_L1\_VE\_rc|1  
AGTACTGCGAGTGGTATCTACCACAGTAACAAATACCTGATTGCCCCAACAAATACCATT  
>HPVFA75/KI88-03\_Unclassified\_206902429\_nt6791\_L1\_VE\_rc|2  
ATCTTCTAATATACCTGAATTCATTGCATTGATCTGGGCTAGCACATCAGGTTGCAGTGA  
>HPV7\_Alpha\_9627389\_nt5979\_L1\_VE\_rc|1  
TTTATTAGGGTCTGGGCAAGCGTACTCTAAACACTCTGTATTGATGTCCAGACACTTTAGG  
>HPV29\_Alpha\_1020210\_nt6744\_L1\_VE\_rc|1  
AAATACCTGATTGGCCCAGCATATACCATTGTTGTGTCCCTGGGCCTGCTGTAGCCAGTA  
>HPV48\_Gamma\_9628542\_nt6433\_L1\_VE\_rc|2  
ATCTTCAATGCCCCTGGAGCTGGTGAACAAAAGCTAATTGCCACTCCTCTAATATTCT  
>HPVcand89\_Alpha\_22095322\_nt6668\_L1\_VE\_rc|1  
ACCATTATTATGGCCCTGTGCACGGTGCAGCCAATAAGGCTTATTAAATAACTGGGAATC  
>HPV44\_Alpha\_1020242\_nt6265\_L1\_VE\_rc|1  
CAATTCAGCAAAATTCATGGCTCCAAAACAGTGTCCACCATATCACCATCCTCAATTAC  
>HPV19\_Beta\_396940\_nt6765\_L1\_VE\_rc|1  
GTTAAACAATTGAGCATCACTGGATACTAATGAGCCACTAACAGTTGGGAAATACATGGC  
>HPV103\_Unclassified\_109390382\_nt5036\_L1\_VE\_rc|1  
ATATGGGTGTCCTACAGTAAGCAGGCGGTGCTGGAGGCATGGAAGAAAATAGACGTTTC  
>HPV73\_Alpha\_1491692\_nt5525\_L1\_VE\_rc|1  
ATTTGTTCTTGTACATATTCATCTGTGCTTACAACCTTAGACACAGACACAGGGGGCAG  
>HPV59\_Alpha\_557236\_nt5787\_L1\_VE\_rc|1  
GGGATCAGGTAACCTTAACCCTAAATACTCTGTATTGATATGCAGACACCTTAGGAACATC

>HPV52\_Alpha\_397038\_nt5956\_L1\_VE\_rc|1  
AGGATGCCCACTAATACCCACACCTAAAGGCTGTCCCCTACCAATTTCCAAGCCTGTACA  
>HPV35\_Alpha\_333050\_nt5635\_L1\_VE\_rc|1  
AGAAGTGCCTGCATGATAGTAGATGTTTGTGCGTGTTACATATTCATCAGTGCTAACAAC  
>HPV58\_Alpha\_222386\_nt5956\_L1\_VE\_rc|1  
TAAATAAGGATGACCACCTTACGCCAACACCCAATGGCTGTCCCCTACCTATTTCAAGGCC  
>HPV58\_Alpha\_222386\_nt5686\_L1\_VE\_rc|1  
ATAAATGCTTGTGCGTGACACATATTCATCAGTGCTTACAACCTTAGACACAGGCACAGG  
>HPV93\_Beta\_37089393\_nt6601\_L1\_VE\_rc|1  
TGCCCAACAAAATACCATTATTATGACCTTGTGCGCGTTGGAGCCAGAAGGGCCTATTAAA  
>HPV58\_Alpha\_222386\_nt5716\_L1\_VE\_rc|1  
AGCCAAAAGTCTGGAAGTGCAGCATAATAATAAATGCTTGTGCGTGACACATATTCATC  
>HPV69\_Alpha\_6970418\_nt6472\_L1\_VE\_rc|1  
CAATTGGTTGCCCCAACAAATGCCATTATTATGACCCTGGGCACGCTGTAACCAGTAAGG  
>HPV93\_Beta\_37089393\_nt5671\_L1\_VE\_rc|1  
TTGTACATATTCATCCGTGCTTTGTACTCTGGCAACTGGTGTGAAGGTGGCAAATATAC  
>HPV41\_Nu\_9626041\_nt5637\_L1\_VE\_rc|1  
GTAAAATGGATGTCCAACAGTAAGCAAACGGTCAGTGGCAGCATGGAGGAAAGTACTGGT  
>HPV38\_Beta\_1020234\_nt6412\_L1\_VE\_rc|1  
AGCGTCACCCACTGCACCACCTCGAACAAAATAATGTCTGGCATAGCATTGCTCCCGTCG  
>HPV102\_Alpha\_71726718\_nt6704\_L1\_VE\_rc|1  
ACAAATGCCATTATTGTGTCCCTGGGCGCTTGAAGCCAGTAAGGCTTATTAAACAGTTG  
>HPV97\_Alpha\_71726694\_nt6407\_L1\_VE\_rc|1  
ACAAATACCATTGTTATGGCCCTGGGCGCTATGCAACCAATATGGCTTATTAAACAACTG  
>HPV10\_Alpha\_9627257\_nt6400\_L1\_VE\_rc|1  
TAAAGCAGTAAAGTCCATGGCCCCATAGCCAGTGTCCACCATATCACCATCCTGAATAGG  
>HPV38\_Beta\_1020234\_nt5722\_L1\_VE\_rc|1  
GCTAGTTGCATGGTAATAGATGTCTGTTCGTTCCACATATTCATCCGTGCTTTGAACGCG  
>HPVFA75/KI88-03\_Unclassified\_206902429\_nt6521\_L1\_VE\_rc|1  
CCAAAAAGGCCTATTAAATAACTGAGCATCTGAAGAGACTAGAGAACCCTAACAGTAGG  
>HPV58\_Alpha\_222386\_nt6586\_L1\_VE\_rc|1  
AACCACGGTAACAAATAACTGATTGCCCCAGCAAATGCCATTGTTATGACCTTGTGCACG  
>HPV42\_Alpha\_333211\_nt6147\_L1\_VE\_rc|1  
ATTCATAATGGATGGCCACTAATACCAACGCCCAAAGGCTGTCCACGACCTACTTCTAG  
>HPV41\_Nu\_9626041\_nt5847\_L1\_VE\_rc|1  
AGGGTTCCCTGTTACACCAATACCTAAGGGCTGTCCCCTAGAAACCTCAATCCCACGAAT  
>HPV50\_Gamma\_9628550\_nt5562\_L1\_VE\_rc|1  
ATTTTCTGTGTCTCCAACCTTATTAAACAAGGGATGACCAGTAGATCCAACACCTAAAGG  
>HPV103\_Unclassified\_109390382\_nt5066\_L1\_VE\_rc|1  
TGTACCTTACCCACTTTTGTAAATTGGAAAAATATGGGTGTCCTACAGTAAGCAGGCGGTC  
>HPV52\_Alpha\_397038\_nt5716\_L1\_VE\_rc|1  
TGTTAGTAATCGAGAACTGCCTGCATAATAATAGATGCTTGTGCGAGACACATACTCATC  
>HPV92\_Beta\_27531786\_nt6599\_L1\_VE\_rc|1  
CAGTTCATTACTCCAGCAAATACCATTGTTGTGGCCTTGTGCTCTTTGTAACCAATATGG  
>HPV92\_Beta\_27531786\_nt6569\_L1\_VE\_rc|1  
GTGGCCTTGTGCTCTTTGTAACCAATATGGCCGATTAAATAATTGTGCATCAGTGGATAC  
>HPV21\_Beta\_1020170\_nt6830\_L1\_VE\_rc|1  
CAATTGAGCGTCACTAGACACCAATGAGCCACTGACAGTTGGGAAATACATGGAGTTACC  
>HPV9\_Beta\_9627396\_nt5776\_L1\_VE\_rc|1  
TTCCACATATTCATCGGTGCTTTGAACTCTCGCCACTGGTGTGCTGGTGGCAAATATAC  
>HPV32\_Alpha\_9627327\_nt6443\_L1\_VE\_rc|1  
CAAAGCACTAAAGTCCATTGCTCCAAACCTACATCTGCCATATCACCATCCTGAATAAC  
>HPV76\_Beta\_2911551\_nt5830\_L1\_VE\_rc|1  
AATGTATTTCATCCGTGCTTTGAACCCTGGCCACAGGTGTTGATGGTGGAAGATAAACCTT  
>HPV97\_Alpha\_71726694\_nt6077\_L1\_VE\_rc|1

CTGTAATGTACTAAAGTCCATGGCACCATAACCTGTATCTACCATATCGCCATCCTCCAA  
>HPV1\_Mu\_9626063\_nt6014\_L1\_VE\_rc|1  
GTCTTGCTGTAAAGCAGCAAAATCCATAGCCCCAAAACCAATATCCATCATGTCACCATC  
>HPV11\_Alpha\_333026\_nt6702\_L1\_VE\_rc|1  
CACAGTAACAAACAAGTGGTTTCCCCAGCAAATACCATTGTTATGTCCCTGAGCCTTTTG  
>HPV66\_Alpha\_1020290\_nt6608\_L1\_VE\_rc|1  
GTTGGTGCTTCTGGTAGTATCCACAACAGTAACAAATACCTGATTACCCAGCATATGCC  
>HPV34\_Alpha\_9627334\_nt6421\_L1\_VE\_rc|1  
ATTATGCCAGCAAATGCCATTGTTTTGTCCCTGGGCCTTTTGCAACCAATAAGGCTTATT  
>HPV107\_Beta\_126131393\_nt6749\_L1\_VE\_rc|1  
AACAAACATTTGGTTTCCCCATAGAATACCATTATTGTGGCCTTGTGCACGTTTCAACCA  
>HPV65\_Gamma\_312100\_nt5447\_L1\_VE\_rc|1  
GTGTTGATCCTGCACATCTTTCCTGGAATAAGGATGGCCTACAGTTAAAAGCCTTTC  
>HPV30\_Alpha\_396973\_nt6592\_L1\_VE\_rc|1  
AACAGTAACAAATACCTGGTTGCCCCAACAAATGCCATTATTGTGTCCCTGTGCGCGTTG  
>HPV34\_Alpha\_9627334\_nt6181\_L1\_VE\_rc|1  
CCACATAGAATCGCCATAGGGATCTGCGCCATGCCTAGATAATCTGGATATTTACATAT  
>HPV70\_Alpha\_1173493\_nt5921\_L1\_VE\_rc|1  
TTCAGTATCATCCAATCTATTATATAAAGGATGTCCACTAACGCCAACGCCCAATGGCTG  
>HPV58\_Alpha\_222386\_nt6616\_L1\_VE\_rc|1  
TAATGTCATATTAGTGCTACGAGTGGTATCAACCACGGTAACAAATAACTGATTGCCCCA  
>HPV96\_Beta\_50253426\_nt5917\_L1\_VE\_rc|1  
ATTAGCATGATAATAGATGTTTGTCTTTGTATGTAGGAGTCCGTGCTTTGCACCCTGGC  
>HPV96\_Beta\_50253426\_nt6187\_L1\_VE\_rc|1  
TTTCACCTTGTTAAATAATGGATGTCCTGATGTACCTACACCTAATGGCTGTCCACGACC  
>HPV49\_Beta\_9627363\_nt5842\_L1\_VE\_rc|1  
AATGTATTTCATCCGTGCTTTGTACCCTTGCCACAGGTGTTGAAGGTGGTAGATATACCTT  
>HPV82\_Alpha\_6970427\_nt5872\_L1\_VE\_rc|1  
AGGATGACCACTAAGGCCAACACCTAACGGCTGACCCCTACCTACTTCAACACCAACACA  
>HPV50\_Gamma\_9628550\_nt6462\_L1\_VE\_rc|1  
ACCACTGGGAGCTGGTGGAAACATAAGCTAATTGCCAATTTTCCAAAATTCTGGGGTCCAT  
>HPV103\_Unclassified\_109390382\_nt5546\_L1\_VE\_rc|1  
TACACCTGAATGGTCCTCCTGCAATGTAGCAAAATTCATTGCACCAAAGCCAATATCACA  
>HPV53\_Alpha\_9627377\_nt6526\_L1\_VE\_rc|1  
CCAATATGGCTTATTAAACAATTGAGCCTCTGAAGTTATCATAGACCCACTAGGTGTAGC  
>HPV70\_Alpha\_1173493\_nt6521\_L1\_VE\_rc|1  
AGTAATAAACAACTGGTTATGCCAACAAATGCCATTATTGTGTCCCTGGGCCTTATGCAA  
>HPV34\_Alpha\_9627334\_nt5731\_L1\_VE\_rc|1  
CTTGTCAGGATTATAAAAAGATGCATCTGGGAACCCAAATTTATTGGGATCTGGCAAACG  
>HPV96\_Beta\_50253426\_nt5887\_L1\_VE\_rc|1  
TATGTAGGAGTCCGTGCTTTGCACCCTGGCAACTGGTGTGATGGTGGTAAATAGACCTT  
>HPV17\_Beta\_396932\_nt5755\_L1\_VE\_rc|1  
TTCCACATACTCATCCGTGCTTTGTACTCGGGCTACTGGTGGTGTGGAGGCAAGTATAC  
>HPV82\_Alpha\_6970427\_nt6142\_L1\_VE\_rc|1  
AGCAAAATCCATGGCCCCAAAACAGTGTCCACCATATCGCCATCCTCAATGACAGTAGA  
>HPV37\_Beta\_1020226\_nt5987\_L1\_VE\_rc|1  
TCGGCCTATCTCCAAGCCGCACAGGCCACACCAACCTTTCCTTTTCTGGATTATATAC  
>HPV9\_Beta\_9627396\_nt6676\_L1\_VE\_rc|1  
GTTGTGACCTTGTGCTCTTTGGAGCCAAAATGGCCTATTAAACAATTGAGCATCTGAAGT  
>HPVRTRX7\_Unclassified\_30315616\_nt6882\_L1\_VE\_rc|1  
CTGATTAGCCACAGAATGCCATTATTATGACCCTGTGCTCTTTGCAGCCAGAAGGGCCT  
>HPV71\_Alpha\_12084981\_nt5807\_L1\_VE\_rc|1  
TACCTTGCTGTCACTAGGCCGCCACAAAGCCATCTGCAAAAAAATAGTGGACACGTTTAG  
>HPV84\_Alpha\_12958167\_nt6596\_L1\_VE\_rc|1  
ATTAAACCAGCATATACCATTGTTATGACCCTGGGCCTTTTGCAACCAGTATGGCTTATT



>HPV80\_Beta\_2911565\_nt5749\_L1\_VE\_rc|1  
TTCCACATATTCATCGGTGCTTTGTACACGTGCTACAGGTGGTGTGGTGGTAAATACAC  
>HPV65\_Gamma\_312100\_nt5417\_L1\_VE\_rc|1  
ATAAGGATGGCCTACAGTTAAAAGCCTTTCTGTTCCAGCGTGGAAATAAAGAGATGTTCC  
>HPV11\_Alpha\_333026\_nt6432\_L1\_VE\_rc|1  
ACCATAAGGGTCTGCAGCCATTTGCAAATAATCAGGATATTTGCAGACAGTTCACAAAT  
>HPV74\_Alpha\_27462483\_nt6024\_L1\_VE\_rc|1  
TTCACCCAACGGGGGAGCACAGCCTACCATGCATAACTGTGTTTGCTTATAATCCATAGC  
>HPV31\_Alpha\_333048\_nt6483\_L1\_VE\_rc|1  
TAACTGATTGCCCCAACAAATACCATTATTGTGTCCCTGAGCACGTTGCATCCAATATGG  
>HPV101\_Unclassified\_109390389\_nt5608\_L1\_VE\_rc|1  
AAAATTTCATGGCACCAAGCCAATATCACACATATCCCCATCCTGAATAACAGAGGACAC  
>HPV52\_Alpha\_397038\_nt6406\_L1\_VE\_rc|1  
CACAGGGTCACCTAAGGTACCGGCCCTATTAAAAAGTGTCTAACAAACATTTGCTCACG  
>HPV22\_Beta\_1020178\_nt6143\_L1\_VE\_rc|1  
ACTGCCTGCATCTTCACAAACAGGAGCTTTATCCCAATATTCACCTAAACACGGTATACA  
>HPV83\_Alpha\_5059324\_nt6673\_L1\_VE\_rc|1  
CTCATTAACCAACAAATGCCATTATTATGTCCCTGGGCACGATGCAGCCAGTAGGGCTT  
>HPV28\_Alpha\_1020202\_nt6311\_L1\_VE\_rc|1  
AGCAAAGTCCATTGCAACCAAGCCAGTTCACCATATCACCATCCTGAATAGGGGCAGT  
>HPV88\_Gamma\_167600365\_nt5431\_L1\_VE\_rc|1  
GTTGGGATCTCCATCATTCCTAATTTTCATAGTAGGGATGGTCTACTGTTAACAGACGATC  
>HPV53\_Alpha\_9627377\_nt6586\_L1\_VE\_rc|1  
AGTTACAAATAACTGATTGTTCCAACAGATGCCATTATTATGTCCCTGGGCACGTTGCAG  
>HPV82\_Alpha\_6970427\_nt6472\_L1\_VE\_rc|1  
ATTGTGGCCCTGGGCGCGATGCAACCAATAAGGCTTATTAATAAATCTGAGAATCAGAGGT  
>HPV107\_Beta\_126131393\_nt6539\_L1\_VE\_rc|1  
AGCATCACCCACAGCTCCTCCTCTAGTGAAATAATGTCTAGCATAACATTGTTCTCTCCT  
>HPVcand62\_Alpha\_39932599\_nt5778\_L1\_VE\_rc|1  
CTTAGAAACAGGAGTGGGAGGCAGGTATACCTTGCCGTCACCAGGCCGCCACATAGCCAT  
>HPV8\_Beta\_333074\_nt6812\_L1\_VE\_rc|1  
CATTTGATTAGCCCAGAGAATGCCATTATTATGACCCTGGGCACGCTGCAGCCAGAAAGG  
>HPV17\_Beta\_396932\_nt5935\_L1\_VE\_rc|1  
TGACATATCTGCCAAGGCAAACCTTATTAGGATCTGGTAATGTGACTCTGAAGGCTCTATA  
>HPV70\_Alpha\_1173493\_nt6491\_L1\_VE\_rc|1  
GCCATTATTGTGTCCCTGGGCCTTATGCAACCAATAGGGCTTATTAACAACCTGGGAATC  
>HPV91\_Alpha\_22023568\_nt6316\_L1\_VE\_rc|1  
GCCCCAATATTCGCCCATGGGAGGTGTACAGCCAACAATACATAGCTGTGTTTGTTTATA  
>HPV43\_Alpha\_40804474\_nt6328\_L1\_VE\_rc|1  
GGAAGCAAAATCCATTGCACCAATCCTGTATCTACCATGTCCACCATCCTGTATAACTTC  
>HPVcand89\_Alpha\_22095322\_nt6698\_L1\_VE\_rc|1  
AGTAACAAACAACTCATTAACCAACAAATACCATTATTATGGCCCTGTGCACGGTGCAG  
>HPV17\_Beta\_396932\_nt6145\_L1\_VE\_rc|1  
GCCTACAACAAACATCTGCACTTGTTTAGGGTCAAATGACGTGTTTTGTCTATCATCAGT  
>HPV63\_Mu\_9626605\_nt6752\_L1\_VE\_rc|2  
TGCAAGACCACTTTGATACAAAAATTTGCGGCCATAAAGGAAATTGATCAAGCTGCTCCGA  
>HPV3\_Alpha\_397005\_nt5818\_L1\_VE\_rc|1  
CAAGCGAGAACTGCCCTGCATAATAATAAATGTTGGTGCCTGTACATAGTCGTCCTGCT  
>HPV4\_Gamma\_9626597\_nt5466\_L1\_VE\_rc|1  
GTGAGGTTCCCTGTACATCTTTCACTGGAAAAATAAGGATGGCCTACAGTTAAAAGCCTTTC  
>HPV12\_Beta\_396910\_nt6805\_L1\_VE\_rc|1  
CTGATTAGCCCACAGGATGCCATTATTATGACCCTGTGCTCTTTGAAGCCAGAAGGGCCT  
>HPV37\_Beta\_1020226\_nt6467\_L1\_VE\_rc|1  
ATCACCTACATTTCCCCCTCTTACAAAAATAATGTCTGGCATAACATTGTTCTCTCCTAGC  
>HPV48\_Gamma\_9628542\_nt5773\_L1\_VE\_rc|1

CAACTTAGGAAAATTAGCAGCCCCAAAGCCTATATCTCCCATATCACCATCCTGAATAAC  
>HPV28\_Alpha\_1020202\_nt6671\_L1\_VE\_rc|1  
AAACAATTGGTTGGCCCAACAGATACCATTATTGTGTCCCTGAGCAGCCGCAGCCAATA  
>HPV66\_Alpha\_1020290\_nt6578\_L1\_VE\_rc|1  
AACAAATACCTGATTACCCCAGCATATGCCATTATTATGGCCCTGTGCACGTTGCAACCA  
>HPV4\_Gamma\_9626597\_nt5436\_L1\_VE\_rc|1  
ATAAGGATGGCCTACAGTTAAAAGCCTTTCTGTACCAGCGTGGAAATACAGAGATGTTCC  
>HPV54\_Alpha\_9628437\_nt6515\_L1\_VE\_rc|1  
GCCCCAACAAATACCATTGTTTTGACCTGGGCCCCGTTGTAACCAGTATGGCTTATTAAA  
>HPV39\_Alpha\_333245\_nt6574\_L1\_VE\_rc|1  
AAGAAATAATTGATTATGCCAACATATACCATTGTTGTGGCCCTGGGCCTTATGTAGCCA  
>HPV22\_Beta\_1020178\_nt6623\_L1\_VE\_rc|1  
AGCTACTGTTACAAACATTTGGTTGTTCCACAAAATACCATTATTATGGCCCTGCGCGCG  
>HPV67\_Alpha\_3228267\_nt5650\_L1\_VE\_rc|1  
TGTGCGTGACACATATTCATCAGTGCTTACAACCTTAGATACAGGCACAGGAGGCAGGTA  
>HPV61\_Alpha\_9628574\_nt6665\_L1\_VE\_rc|1  
GTGGCCCTGGGCACGTTGCAGCCAATATGGCTTATTAAATAATTGGGAATCAGAGGACAC  
>HPV84\_Alpha\_12958167\_nt6566\_L1\_VE\_rc|1  
CTGGGCCTTTTGCAACCAGTATGGCTTATTAAACAATTGGGAATCCGAGGACACCATAGA  
>HPVcand62\_Alpha\_39932599\_nt6438\_L1\_VE\_rc|1  
AGGTTCTGCAGCCATTTGCAATAGTCAGGATATTTACATGTGGAGGTGCATATATCCAA  
>HPV101\_Unclassified\_109390389\_nt5638\_L1\_VE\_rc|1  
TACCCCTGAGTGATCAGCCTGCAAGGCAGCAAAAATTCATGGCACCAAAGCCAATATCACA  
>HPV39\_Alpha\_333245\_nt6544\_L1\_VE\_rc|1  
ATTGTTGTGGCCCTGGGCCTTATGTAGCCAATAAGGCTTATTAAATAACTGGGAATCAGA  
>HPV111\_Beta\_186461202\_nt6553\_L1\_VE\_rc|1  
ATTGTTGTGGCCTTGTGCACGTTGCAACCAAAATGGTCTATTAAATAGCTGCGCATCTGA  
>HPV68a\_Alpha\_71726685\_nt5669\_L1\_VE\_rc|1  
AGGATCAGGTAAGGTAACCCTAAACACTCTGTATTGATATGCAGACACCTTAGGAATGCC  
>HPV90\_Alpha\_22138122\_nt6753\_L1\_VE\_rc|1  
TGTAGTATCAACCACAGTTACAAAAAGCTGATTACCCAGCAGATACCATTGTTAGGGCC  
>HPV61\_Alpha\_9628574\_nt5765\_L1\_VE\_rc|1  
TTTAGACACAGGAGTGGGAGGCAGGTATACCTTGCCGTCACCAGGCCGCCACAAAGCCAT  
>HPV7\_Alpha\_9627389\_nt6549\_L1\_VE\_rc|1  
TGGAACACTGTCTCCAGTAGTTCCCTGCCCTATTAAAAAAGTGCCTAACAAACATTTGTTC  
>HPV93\_Beta\_37089393\_nt6391\_L1\_VE\_rc|1  
TCCTACGTTGCCACCTCTTACAAAAAAGTGTCTGGCATAACATTGCTCTCTGCGAGCAAA  
>HPV34\_Alpha\_9627334\_nt5761\_L1\_VE\_rc|1  
AACGCCTGCACAGGCCCAAACCAACCGCTCCTTGTCAGGATTATAAAAAAGATGCATCTGG  
>HPV101\_Unclassified\_109390389\_nt6358\_L1\_VE\_rc|1  
ATCAACCACCCAAAAAGACATTTTGTCTATATGGATCTTCCTTTTCCTTAGGAGGCTCTGC  
>HPV51\_Alpha\_333087\_nt6092\_L1\_VE\_rc|1  
AGCGAAATCCATAGCTCCAAACCCTGTATCAATCATATCGCCATCCTGAATGACAGAGGA  
>HPV72\_Alpha\_1491683\_nt5764\_L1\_VE\_rc|1  
GTATACCTTGCCGTCACCAGGCCGCCACAAAGCCATCTGCAAAAGAATAGGGCACACGTT  
>HPV41\_Nu\_9626041\_nt6507\_L1\_VE\_rc|1  
GGCCTCGTTGTGCCACAGTATGCCATTGTTATGGCCCTGGGATCTCTGCAGCCAAAAGGG  
>HPV26\_Alpha\_9627305\_nt5589\_L1\_VE\_rc|1  
CCGAGACACAGGGGTGGGAGGAAGATATACCTTGCTGTCACTAGTACGCCACAAAGCCAT  
>HPV11\_Alpha\_333026\_nt6342\_L1\_VE\_rc|1  
TAAGTCTGCAAAATTCATAGCACCAAAGCCTGTATCAACCATGTCCCCATCCTGTATAAC  
>HPV6\_Alpha\_6002612\_nt6721\_L1\_VE\_rc|1  
TACCACAGTAACAAACAGTTGATTACCCCAACAAATACCATTGTTATGTCCCTGGGCTTT  
>HPV57\_Alpha\_60882\_nt5734\_L1\_VE\_rc|1  
AGGCAGGTATACCTTGCTTTTCATTAGGCCGCCACATAGCCATCTGCAAAAGAAATAGTGCA

>HPV110\_Beta\_186461194\_nt6007\_L1\_VE\_rc|1  
AGTATCTCTAACTTTATTAAATAAGGGATGACCACTGGTACCTACCCCTAAAGGTTGCCC  
>HPV73\_Alpha\_1491692\_nt6185\_L1\_VE\_rc|1  
CCTACGAAGATAAAACCACATGGAATCACCATAGGGATCAGCAGCCATGCCTAAATAATC  
>HPV83\_Alpha\_5059324\_nt6313\_L1\_VE\_rc|1  
AAAATCCATGGCACCATAGCCTGTTTCCACCATGTCGCCATCCTGTATAGTAGAATTTAC  
>HPV52\_Alpha\_397038\_nt6616\_L1\_VE\_rc|1  
GCTACGAGTGGTATCCACAACCTGTGACAAACAACCTGATTGCCCCAACATATGCCATTATT  
>HPV110\_Beta\_186461194\_nt5887\_L1\_VE\_rc|1  
AGACATGTCTGCTAATGCAAACCTATTAGGATCAGGCAATTGCACCCGGAATGCTCTGTA  
>HPV3\_Alpha\_397005\_nt6688\_L1\_VE\_rc|1  
AAACAATTGGTTGGCCCAACATATAACCATTTATGTGTCCCTGAGCACGCCGCAGCCAATA  
>HPVFA75/KI88-03\_Unclassified\_206902429\_nt6101\_L1\_VE\_rc|1  
ATCTCCTGCATTTTCACATGGCTCAGCTTTATCCCAGTATTCTCCTAAACATGGTGTACA  
>HPV43\_Alpha\_40804474\_nt5818\_L1\_VE\_rc|1  
ACGTGAACTGCCAGCATAATAAAATAAGTTGGTGCGTTGCACATATTCATCTGTGCTCAC  
>HPV9\_Beta\_9627396\_nt6496\_L1\_VE\_rc|1  
GTCACCAACTGAACCTCCTTAACATAATAATGCCTGGCATAACATTGTTCTCTTCTTGC  
>HPV38\_Beta\_1020234\_nt5782\_L1\_VE\_rc|1  
TTTTTGACCATCCTGTGATCTGACATCAAAATATGGATGGCCTACTGTTAATAGGCGATC  
>HPV103\_Unclassified\_109390382\_nt5846\_L1\_VE\_rc|2  
TGGTCTGCCAAACAACCTGAGAATCACTAGAAACCAGTGATCCACTGGGGGTTGCATAGTA  
>HPV44\_Alpha\_1020242\_nt6625\_L1\_VE\_rc|1  
TACAACAGTAACAAATAACTGATTTCCCCAACAAATACCATTATTGTGGCCCTGCGCCTT  
>HPV56\_Alpha\_397053\_nt6513\_L1\_VE\_rc|1  
ACCCAGCAAAATGCCATTATTATGGCCTTGGGCACGTTGCAACCAATAAGGTTTATTAAA  
>HPV53\_Alpha\_9627377\_nt5656\_L1\_VE\_rc|1  
CTTTGATACAGGGGTAGGAGGCAGATAAACCTTGCTGTCACTAGGCCGCCACACCGCCAT  
>HPV60\_Gamma\_9628566\_nt6686\_L1\_VE\_rc|2  
ATAAGGGTCTTCCCTTTCAGTATTAGGAACATCTGTTGGACACATTGTTGCCTGAGACAT  
>HPV68a\_Alpha\_71726685\_nt6389\_L1\_VE\_rc|1  
GTTGTGTCCCTGTGCCTTGTGCAGCCAATAGGGCTTGTTAAATAACTGGGAGTCAGAGGA  
>HPV14D\_Beta\_396918\_nt6504\_L1\_VE\_rc|1  
CAGTTGAGCATCACTGGATACCAATGAGCCACTGACAGTTGGGAAATACATGGCATTGCC  
>HPV38\_Beta\_1020234\_nt5692\_L1\_VE\_rc|1  
TTCCACATATTCATCCGTGCTTTGAACGCGCGCAACTGGAGGTGTTGGTGGCAAGTATAT  
>HPV23\_Beta\_1020186\_nt5781\_L1\_VE\_rc|1  
TTTACTACCATCCGGTGATCTAACATCAAAATATGGGTGGCCTACAGTTAGTAATCGATC  
>HPV35\_Alpha\_333050\_nt6475\_L1\_VE\_rc|1  
ATGGCCTTGTGCACGTTGCAACCAATATGGTTTATTAAATATTTGTGCATCGGAGGTTAC  
>HPV39\_Alpha\_333245\_nt6064\_L1\_VE\_rc|1  
ACAGCCTATAATGCACAACCTGTGTCTGTTTATAATCCACAGACACATTATCCCTACTGTC  
>HPV31\_Alpha\_333048\_nt6543\_L1\_VE\_rc|1  
TGCAATTGCAGCACAAACAGACATATTGGTACTACGTGTGGTATCTACCACAGTAACAAA  
>HPV59\_Alpha\_557236\_nt6057\_L1\_VE\_rc|1  
TGTCCAGTGTTCTCCAATGGCAGGTACACAGCCAATAATACACAGCTGAGTTTGTTTATA  
>HPV60\_Gamma\_9628566\_nt6266\_L1\_VE\_rc|2  
TTGATTATCACTAGAAGCTACAGAACCCTTGGTGTAGGGAAGTAACATAACCACCAAG  
>HPV54\_Alpha\_9628437\_nt6545\_L1\_VE\_rc|1  
GGTATCTACAACCTGTTAAAAACACCTGATTGCCCAACAAATACCATTGTTTTGACCCTG  
>HPV74\_Alpha\_27462483\_nt6174\_L1\_VE\_rc|1  
TTTAAGAGGCTGCAATTCAGCAAAATTCATGGCACCAAGCCTGTATCTACCATATCACC  
>HPV65\_Gamma\_312100\_nt5777\_L1\_VE\_rc|1  
CCAATGTTCCCCAATAGCAGGAGTGCAACCTATGATAAACATTTGTGTCTGTTTTGGATC  
>HPV51\_Alpha\_333087\_nt6452\_L1\_VE\_rc|1

AAAAAGCTGATTGTTCCAGCAAATGCCATTATTGTGACCCTGCGCACGGTGGAGCCAATA  
>HPV40\_Alpha\_397014\_nt5960\_L1\_VE\_rc|1  
CTTATTTCGGGTCAGGCAAACGTACCCTAAATACCCTGTATTGATGTCCAGAAACCTTAGG  
>HPV23\_Beta\_1020186\_nt6621\_L1\_VE\_rc|1  
TGCTACAGTCACAAACATCTGGTTGTTCCATAAAATACCATTGTTATGGCCTTGAGCACG  
>HPV3\_Alpha\_397005\_nt6718\_L1\_VE\_rc|1  
AGTACTACGTGTGGTATCCACCACAGTCACAAACAATTGGTTGGCCCAACATATACCATT  
>HPV37\_Beta\_1020226\_nt5747\_L1\_VE\_rc|1  
TTCCACATAATCATCCGTGCTTTGCACCCGGGCTACTGGTGGTGTGGAGGCAAGTATAC  
>HPV111\_Beta\_186461202\_nt6343\_L1\_VE\_rc|1  
GTAATGTCTGGCATAACATTGCTCCCTTCTGGCAAAAAGAAACAAGCGTCCCCATAGAC  
>HPV25\_Beta\_396948\_nt6790\_L1\_VE\_rc|1  
GAATAATTGAGCATCACTGGATACCAATGAGCCACTGACTGTTGGGAAATACATTGAGTT  
>HPV21\_Beta\_1020170\_nt5960\_L1\_VE\_rc|1  
TTGTACATATTCATCCGTGCTTTGGACCCCTGGCAACTGGTGTAGACGGTGAAGGTAAAC  
>HPV103\_Unclassified\_109390382\_nt5486\_L1\_VE\_rc|1  
CATATCCCACATCCTCAATAATGGAACCTAAAGGAGGACATGCACCCATATC  
>HPV60\_Gamma\_9628566\_nt6236\_L1\_VE\_rc|2  
TGGTGTAGGGAAGTAACTATAACCACCAAGGTTATTTTGAGGTTTATCAGTTTGTGGTGC  
>HPV26\_Alpha\_9627305\_nt6489\_L1\_VE\_rc|1  
ATTATGACCCTGTGCACGTTGTAACAGTATGGCTTATTAAATAGTTGTGCATCCGAAGT  
>HPV53\_Alpha\_9627377\_nt6556\_L1\_VE\_rc|1  
GCCATTATTATGTCCCTGGGCACGTTGCAGCCAATATGGCTTATTAAACAATTGAGCCTC  
>HPV1\_Mu\_9626063\_nt5714\_L1\_VE\_rc|1  
TCCTATACCTAAAGGCTGGCCTCTACCTATCTCTATCCCTCTTAGGCCCCAACTAATCT  
>HPV40\_Alpha\_397014\_nt6350\_L1\_VE\_rc|1  
GGAAGCAAAATCCATAGCACCAAAGCCAGTATCCACCATGTGCGCCATCTGAATAACCTC  
>HPV51\_Alpha\_333087\_nt5972\_L1\_VE\_rc|1  
AATACCCAGTGTTCCCCAATAGGTGGAGCACAGCCTATTATACATAACTGAGTCTGTTT  
>HPV1\_Mu\_9626063\_nt5984\_L1\_VE\_rc|1  
CCCCAAACCAATATCCATCATGTACCATCTTCTATGACAGACTCTATCATTTGCACCCT  
>HPV40\_Alpha\_397014\_nt6380\_L1\_VE\_rc|1  
CAATGGCACATCACTTTTATTGGCCTGCAAGGAAGCAAAATCCATAGCACCAAAGCCAGT  
>HPV25\_Beta\_396948\_nt6820\_L1\_VE\_rc|1  
TTGTGCTCGCTGTAACCAAAATGGCCTATTGAATAATTGAGCATCACTGGATACCAATGA  
>HPV56\_Alpha\_397053\_nt6483\_L1\_VE\_rc|1  
GGCACGTTGCAACCAATAAGGTTTATTAAATAACTGTGCCTCAGACGTAATCATAGACCC  
>HPV65\_Gamma\_312100\_nt5807\_L1\_VE\_rc|1  
AACAGGACTTGCACAAGGCTCAGCCTTATCCCAATGTTCCCCAATAGCAGGAGTGCAACC  
>HPVcand87\_Alpha\_14475578\_nt6443\_L1\_VE\_rc|1  
GAACATGCAATCGCCATAGGGCTCAGCAGCCATTGCAAATAGTCAGGATACTTGCAAAC  
>HPV48\_Gamma\_9628542\_nt6133\_L1\_VE\_rc|1  
CCAACAAATGCCATTATTTGTTCCCTGGGCTCGTCTAAGCCAATAAGGCCTATTAAATAA  
>HPV92\_Beta\_27531786\_nt6869\_L1\_VE\_rc|1  
GTATGCATCCTGAATAGGGTTATCTGGAGTAGGAACAAATCCTAACTGCCAGTCCTCCAA  
>HPV58\_Alpha\_222386\_nt6226\_L1\_VE\_rc|1  
CTGCAATGTACCAAAGTCCATGCATCCAAACCCTGTATCTACCATGTCACCATCCTCAAT  
>HPV54\_Alpha\_9628437\_nt6275\_L1\_VE\_rc|1  
GTCCCCATATGCCTCTGCAGCCATTTTAAGGTAATCAGGATATTTACAAATTGAGGTAGC  
>HPV10\_Alpha\_9627257\_nt6730\_L1\_VE\_rc|1  
TATACCATTTGTTGCCCCCTGGGCCCCGCGCAGCCAATATGGCTTATTAAACAATTGAGC  
>HPV80\_Beta\_2911565\_nt6469\_L1\_VE\_rc|1  
ATCGCCTACTGCACCTCCTCTAACAAAATAATGTCTAGCATAACATTGCTCTCGTCTTGC  
>HPV92\_Beta\_27531786\_nt5969\_L1\_VE\_rc|1  
GTCCAATACCTTATTAAATAATGGATGACCTGTGGTGCCAACACCTAAAGGCTGCCCTCG

>HPV33\_Alpha\_333049\_nt6345\_L1\_VE\_rc|1  
AGCCTCTCCTAATGTACCAGCCCTATTAAAAAAGTGTCTTACAAACATTTGTTTCACGTCG  
>HPV10\_Alpha\_9627257\_nt6700\_L1\_VE\_rc|1  
CAGCCAATATGGCTTATTAAACAATTGAGCCTCAGACGTTACCATGGACCCACTGGGTGT  
>HPV38\_Beta\_1020234\_nt6112\_L1\_VE\_rc|1  
ATCCCAGTATTCTCCTAGACAAGGAGTGCAGCCTATTATAAACATTTGCACCTGTTTAGG  
>HPV66\_Alpha\_1020290\_nt5648\_L1\_VE\_rc|1  
CTTTGAAACAGGTGTTGGAGGTAGGTACACCTTATTGTCACTAGGCCGCCACATCGCCAT  
>HPV30\_Alpha\_396973\_nt6562\_L1\_VE\_rc|1  
AATGCCATTATTGTGTCCCTGTGCGCGTTGCAACCAGTAAGGTTTATTAAACAACCTGAGC  
>HPV32\_Alpha\_9627327\_nt6803\_L1\_VE\_rc|1  
AAACACTTGATTACCCCAACATATACCATTTATTGTGGCCTTGTGCCTGCTGTAACCAATA  
>HPV2\_Alpha\_9626032\_nt6853\_L1\_VE\_rc|1  
CTTGCACAGTTGGAAGATGAACTGCAAAATCATATTCCTCCATATGCCTGAGATATTCCTT  
>HPV16\_Alpha\_9627100\_nt6580\_L1\_VE\_rc|1  
AACAACAGTAACAAATAGTTGGTTACCCCAACAAATGCCATTATTGTGGCCCTGTGCTCG  
>HPV5\_Beta\_9627145\_nt6668\_L1\_VE\_rc|1  
GTCATCACCAGTTTTTCCCCCTCTAACAAAAAAGTGTCTGGCATAACATTGCTCCCTACG  
>HPV30\_Alpha\_396973\_nt6532\_L1\_VE\_rc|1  
CAACCAGTAAGGTTTATTAAACAACCTGAGCCTCAGAGGTTACCATAGACCCACTAGGAGT  
>HPV80\_Beta\_2911565\_nt6019\_L1\_VE\_rc|1  
GCCTGATGTGCCTACACCTAATGGTTGTCTCTGCCTATTTCTAGGCCTGCACAGGCCCA  
>HPV90\_Alpha\_22138122\_nt5973\_L1\_VE\_rc|1  
ATCAGGCAAACGTACCCTAAACACCCTATATTGATATCCAGACACCTTGGGAACCACTAT  
>HPV50\_Gamma\_9628550\_nt5532\_L1\_VE\_rc|1  
GGGATGACCAGTAGATCCAACACCTAAAGGCCACCTCTCCCGACTTCTATACCTACTAG  
>HPV111\_Beta\_186461202\_nt6373\_L1\_VE\_rc|1  
TGCATCTCCTACATTGCCTCCTCTAACAAAGTAATGTCTGGCATAACATTGCTCCCTTCT  
>HPV29\_Alpha\_1020210\_nt5874\_L1\_VE\_rc|1  
AGAAGTGCCTGCATAATAATAAATATTTGTGCGTGTACATAGTCGTCGGTGCTGATAAC  
>HPV23\_Beta\_1020186\_nt5721\_L1\_VE\_rc|1  
ACTAGTTGCATGGTAATAGATGTCAGTTCTTTCCACATATTCATCCGTA CTCTGCACTCG  
>HPV42\_Alpha\_333211\_nt5817\_L1\_VE\_rc|1  
TAGATAAACCTTGTTGTCACTAGGCCGCCACACGGACATCTGCAAAAAAATATGGTACAG  
>HPV96\_Beta\_50253426\_nt6817\_L1\_VE\_rc|1  
GATTTGATTACCCAGCAAATACCATTATTATGGCCTTGAGCCCTTTGCAGCCAAAAAGG  
>HPV33\_Alpha\_333049\_nt5925\_L1\_VE\_rc|1  
AGTGTCAATCAAAATTTGTTTAATAAAGGATGACCCTTATGCCAACGCCTAATGGCTGCCC  
>HPV13\_Alpha\_85827580\_nt6043\_L1\_VE\_rc|1  
TAATAATGGATGACCCTAATACCAACACCTAAGGGTTGACCCCTACCAACCTCTAAACC  
>HPV69\_Alpha\_6970418\_nt6502\_L1\_VE\_rc|1  
ACTGCGGGTAGTATCTACACAAGTAACAAACAATTGGTTGCCCCAACAAATGCCATTATT  
>HPV15\_Beta\_396924\_nt5734\_L1\_VE\_rc|1  
CTCCACATATTCATCGGTGCTTTGTACACGTGCTACAGGTGGTGTGGTGGCAAATATAC  
>HPV4\_Gamma\_9626597\_nt5796\_L1\_VE\_rc|1  
CCAATGTTACCTATTGCAGGAGTGCAACCTATAATAAACATCTGTGTTGTTTTGGGTC  
>HPV69\_Alpha\_6970418\_nt6442\_L1\_VE\_rc|1  
ATGACCCTGGGCACGCTGTAACCAGTAAGGTTTATTAAACAATTGAGCATCAGAGGTCAC  
>HPV33\_Alpha\_333049\_nt5625\_L1\_VE\_rc|1  
GCGAGACATATTCATCAGTGCTGACAACCTTTAGATACAGGTACAGGAGGCAGGTACAC  
>HPV23\_Beta\_1020186\_nt6891\_L1\_VE\_rc|1  
CTTTGAAGCCAAATATCTGTATGTGTCATGAACTGCATTATCTGGTGTAGGAACAAACCC  
>HPV27\_Alpha\_396964\_nt6668\_L1\_VE\_rc|1  
CCAGCACATACCATTATTATGTCCCTGGGCCCTCCGTAGCCAGTAGGGCTTATTAAACAA  
>HPV55\_Alpha\_1020266\_nt6625\_L1\_VE\_rc|1

TACAACAGTAACAAATAACTGATTCCCCCAACAAATACCATTATTGTGGCCCTGCGCCCT  
>HPV61\_Alpha\_9628574\_nt6635\_L1\_VE\_rc|1  
CTTATTAAATAATTGGGAATCAGAGGACACCATAGAGCCACTAGGCGTAGGGGAATAAAT  
>HPV88\_Gamma\_167600365\_nt6721\_L1\_VE\_rc|1  
CCTGACACGTTTTGTGGGCAGCAAACCACTTTGAAACAAAAATTTGCGACCTAAGCTAAA  
>HPV14D\_Beta\_396918\_nt6564\_L1\_VE\_rc|1  
AAACCAACAAATACCATTATTGTGGCCTTGTGCGCGCTGTAACCAAAATGGTCTATTGAA  
>HPV102\_Alpha\_71726718\_nt6464\_L1\_VE\_rc|1  
CATACAGTCTCCGTAGGGCTCAGCCGCCATTTGTAAATAATCAGGATATTTACAAATACC  
>HPVcand62\_Alpha\_39932599\_nt6708\_L1\_VE\_rc|1  
CAGTTCATTAAACCAACAAATACCATTATTATGGCCCTGCGCCCGCTGCAGCCAATATGG  
>HPV32\_Alpha\_9627327\_nt6173\_L1\_VE\_rc|1  
AGGATGCCCCTAAGACCAACACCTAAAGGCTGTCCACGGCCAACCTCCAAACCCACACA  
>HPV21\_Beta\_1020170\_nt6860\_L1\_VE\_rc|1  
TGCACGCTGTAGCCAAAATGGCCTGTAAACAATTGAGCGTCACTAGACACCAATGAGCC  
>HPV102\_Alpha\_71726718\_nt6734\_L1\_VE\_rc|1  
TACAACCTGTTACAAATACCTCATTAACCAACAAATGCCATTATTGTGTCCCTGGGCCCCG  
>HPV1\_Mu\_9626063\_nt6374\_L1\_VE\_rc|2  
AACTGTAAATAAATAACTGGTTTCTCCAGCAAATGCCATTATTCTGGCCTTGACATCGCTG  
>HPV16\_Alpha\_9627100\_nt6220\_L1\_VE\_rc|1  
CTGTAATGTAGTAAAGTCCATAGCACCAAGCCAGTATGAACCATATCACCATCCTGAAT  
>HPV18\_Alpha\_9626069\_nt5941\_L1\_VE\_rc|1  
AGTGTCTATCTAATTTATTATAAAATGGATGCCCACTAAGGCCAACACCTAAAGGCTGACC  
>HPV107\_Beta\_126131393\_nt5789\_L1\_VE\_rc|1  
TGCCACCGGAGTTGATGGTGGCAAATATACTTTACCAGTTGCAGGAAGCCACAAAGACAT  
>HPV50\_Gamma\_9628550\_nt6192\_L1\_VE\_rc|1  
TGTAACAAATACCTCATTACCCCAACAAATACAATTGTTCGTACCCTGAGCTCTGCGAAT  
>HPV66\_Alpha\_1020290\_nt5858\_L1\_VE\_rc|1  
ATAGAAAGATGGATCAGGAAGGCCAAACTTATTAGGATCAGGCAACCGTACCCTAAACAC  
>HPV57\_Alpha\_60882\_nt6664\_L1\_VE\_rc|1  
CCGATTGCCCCAGCACATGCCATTGTTATGTCCCTGGGCCCTCCGAGCCAGTAAGGCTT  
>HPV50\_Gamma\_9628550\_nt5262\_L1\_VE\_rc|1  
TTTCACATATTCATCGGTGCTTAAACTCTGGCAACAGGAGTACTTGGTGGAAGGTATAA  
>HPV97\_Alpha\_71726694\_nt6437\_L1\_VE\_rc|1  
CACCACAGTAACAAATAATTGATTATGCCAACAAATACCATTGTTATGGCCCTGGGCCCT  
>HPV26\_Alpha\_9627305\_nt6519\_L1\_VE\_rc|1  
AAACAATTGATTGCCCCAACAGATACCATTATTATGACCCTGTGCACGTTGTAACCAGTA  
>HPV82\_Alpha\_6970427\_nt6502\_L1\_VE\_rc|1  
AAAAAGCTGATTATTCCAGCAAATGCCATTATTGTGGCCCTGGGCGCGATGCAACCAATA  
>HPV75\_Beta\_2911544\_nt5802\_L1\_VE\_rc|1  
AATGTATTTCATCCGTGCTTTGCACCCTGGCCACAGGTGTTGATGGTGGAAGATAAACCTT  
>HPV32\_Alpha\_9627327\_nt5873\_L1\_VE\_rc|1  
CTTGGAACAGGAGGAGGAGGCAGATAAACCTTGTGTCACTAGGCCGCCACACGGACAT  
>HPV74\_Alpha\_27462483\_nt6504\_L1\_VE\_rc|1  
TTGATTACCCCAACAAATGCCATTATTGTGGCCTTGC GCCTTTTGTAGCCAAAAGGGCTT  
>HPV106\_Alpha\_71726710\_nt6200\_L1\_VE\_rc|1  
AATACATAACTGAGTTTGTATTATAATCCATGGACATATTGTCCCGGTTGTCGTCGCCAGG  
>HPV35\_Alpha\_333050\_nt6505\_L1\_VE\_rc|1  
CAATTGGTTACTCCAACAAATACCATTATTATGGCCTTGTGCACGTTGCAACCAATATGG  
>HPV73\_Alpha\_1491692\_nt6365\_L1\_VE\_rc|1  
CCAATAAGGTTTATTAAACAACCTGTGCATCTGAAGAAACCATGGAACCACTAGGTGTAGG  
>HPV88\_Gamma\_167600365\_nt5641\_L1\_VE\_rc|1  
ATCTGGAGCTTTGTAAATAAAGGATGACCTGCAGTACCTACATTTAGTGGTCCACCTCT  
>HPV29\_Alpha\_1020210\_nt6714\_L1\_VE\_rc|1  
GTTGTGTCCCTGGGCCTGCTGTAGCCAGTAAGGCTTATTAAATATTTGAGCCTCAGACGT

>HPV63\_Mu\_9626605\_nt5432\_L1\_VE\_rc|3  
ATCACTGGTAGCGTGATAGAAGATGTTGGTGCAGACACATAATCATCGCTGCTTAGAAT  
>HPV63\_Mu\_9626605\_nt6032\_L1\_VE\_rc|2  
CTGTCCCATTTTAATATAATCTGGATATTTGCAGACAGTGCCTGCAATATCCAAAGGAGC  
>HPV111\_Beta\_186461202\_nt5653\_L1\_VE\_rc|1  
TTCCACATATTCATCGGTGCTTTGTACGCGAGCCACTGGTGTAGATGGTGGCAAATATAC  
>HPV106\_Alpha\_71726710\_nt6740\_L1\_VE\_rc|1  
GGTATCTACCACAGTGACAAATACCTGATTGCCCCAGCAGATACCATTGTTTCGGCCCTG  
>HPV18\_Alpha\_9626069\_nt6511\_L1\_VE\_rc|1  
ATGACCTGTGCCTTATGTAACCAATATGGTTTATTAAACAACCTGGGAGTCAGAGGTAAC  
>HPV16\_Alpha\_9627100\_nt5920\_L1\_VE\_rc|1  
ACCTAATGGCTGACCACGACCTACCTCAACACCTACACAGGCCCAAACCAGCCGCTGTGT  
>HPV19\_Beta\_396940\_nt5895\_L1\_VE\_rc|1  
CCTTTGAACATATTCATCCGTGCTTTGTACCTGGCAACTGGTGTAGATGGTGGAAAGGTA  
>HPV9\_Beta\_9627396\_nt6046\_L1\_VE\_rc|1  
ACCTGATGTTCCAACCCCTAAAGGTTGTCTCTGCCTATTTCAATACCTCTACAGGCCCA  
>HPV29\_Alpha\_1020210\_nt6384\_L1\_VE\_rc|1  
AAAGTCCATGGCACCGTACCCGGTATCCACCATATCGCCATCCTCAATATGTGTGGTCAT  
>HPV107\_Beta\_126131393\_nt6029\_L1\_VE\_rc|1  
TACCAGCCTTTCCTTGTTCAGGATTGTATACCTGACATGTCTGCTAATGCAAATCGATTGGG  
>HPV7\_Alpha\_9627389\_nt6369\_L1\_VE\_rc|1  
TGATGCAAAATCCATGGCACCAAGCCTGCATCAACCATGTGCGCCATCCTCAATAACTTC  
>HPV11\_Alpha\_333026\_nt6732\_L1\_VE\_rc|1  
TGTCATATTTGTACTGCGTGTGGTATCTACCACAGTAACAAACAAGTGGTTTCCCCAGCA  
>HPV25\_Beta\_396948\_nt5920\_L1\_VE\_rc|1  
TTGCACATATTCATCCGTGCTTTGTACCTGGCAACAGGTGTAGATGGTGGAAAGGTACAC  
>HPV24\_Unclassified\_9628486\_nt6614\_L1\_VE\_rc|1  
TAATTGAGCATCACTAGATAACCAATGAGCCACTGACTGTTGGGAAATACATTGAGTTGCC  
>HPV54\_Alpha\_9628437\_nt5615\_L1\_VE\_rc|1  
GACAACCTTAGAACTGGGGTAGGAGGCAGGTATACTTTGTTTTCGCTAGGCCGCCACAT  
>HPV11\_Alpha\_333026\_nt6192\_L1\_VE\_rc|1  
TGGAGCACAGCCCACCATAACATAGCTGGGTTTGTATTATAATCCATACCTACATTAACCCT  
>HPV1\_Mu\_9626063\_nt6614\_L1\_VE\_rc|1  
TAGAGGATTGGTAGGTGGTTGAGATACAGATAGTTGCCAATCCTCTAAAATATTAGGGTC  
>HPV70\_Alpha\_1173493\_nt6011\_L1\_VE\_rc|1  
GCCTATAATACATAACTGTGTTTGCTTATAGTCCACAGACACATTGTCCCTACTGTCTCTG  
>HPV39\_Alpha\_333245\_nt6214\_L1\_VE\_rc|1  
ACCAAAGTCCATAGCTCCATAGCCAGTATCAATCATATCACCATCCTCAATAGGGGTGTT  
>HPV101\_Unclassified\_109390389\_nt5578\_L1\_VE\_rc|1  
CATATCCCCATCCTGAATAACAGAGGACACCAACTGTAAAGGAGGACAGGTGCCTTTAGG  
>HPV31\_Alpha\_333048\_nt5853\_L1\_VE\_rc|1  
ACCACTAATACCTACACCTAATGGCTGCCCCGCGACCTACCTCTAAACCAACACAGGCCCA  
>HPV44\_Alpha\_1020242\_nt5995\_L1\_VE\_rc|1  
TAATAATGGATGCCCCTAATACCAACACCTAAGGGCTGTCCTCTACCTACCTCCAGCCC  
>HPV23\_Beta\_1020186\_nt5871\_L1\_VE\_rc|1  
AGTCATGTCTGCTAATGCAAACCTTATTAGGGTCTGGAAATGTAACCTCTAAAGGCCCTGAA  
>HPV15\_Beta\_396924\_nt6004\_L1\_VE\_rc|1  
GCCTGAAGTACCAACTCCTAATGGTTGTCTCTACCTATTTCAAGGCCTACACAGGCCCA  
>HPV101\_Unclassified\_109390389\_nt6148\_L1\_VE\_rc|2  
TTTACAGAGCTGCACAATGAGAGAAATTTCAAATTCCTCCACATGTCTGAGGTAGTGCTT  
>HPV22\_Beta\_1020178\_nt5963\_L1\_VE\_rc|1  
ACCTGTGGTACCTACACCTAAGGGCTGTCTCTTCTCTATTTCTAACCCTTTACAAGCCCA  
>HPV6\_Alpha\_6002612\_nt6361\_L1\_VE\_rc|1  
CTGCAAAATCAGCAAAATTCATAGCACCAAGCCTGTGTCAACCATATCGCCATCCTGTAT  
>HPV16\_Alpha\_9627100\_nt5950\_L1\_VE\_rc|1

ATTTAATAAAGGATGGCCACTAATGCCCACACCTAATGGCTGACCACGACCTACCTCAAC  
>HPV63\_Mu\_9626605\_nt5822\_L1\_VE\_rc|1  
CCAGTGTTCCTCCAGTGGCTGGTGTACAGCCAATTAGAAACATTTGGGTTGTTTTGCATC  
>HPV80\_Beta\_2911565\_nt5989\_L1\_VE\_rc|1  
TCTGCCTATTTCTAGGCCTGCACAGGCCCAAACCAACCTTTCTTTTTCTGGATTATAAAC  
>HPV1\_Mu\_9626063\_nt5414\_L1\_Tile|1  
ATGTATAATGTTTTTCAGATGGCTGTCTGGTTACCAGCGCAGAATAAGTTCTATCTTCCT  
>HPV1\_Mu\_9626063\_nt5419\_L1\_Tile|1  
TAATGTTTTTCAGATGGCTGTCTGGTTACCAGCGCAGAATAAGTTCTATCTTCCTCCCCA  
>HPV1\_Mu\_9626063\_nt5434\_L1\_Tile|1  
GGCTGTCTGGTTACCAGCGCAGAATAAGTTCTATCTTCCTCCCCAGCCCATCACTAGAAT  
>HPV1\_Mu\_9626063\_nt5439\_L1\_Tile|1  
TCTGGTTACCAGCGCAGAATAAGTTCTATCTTCCTCCCCAGCCCATCACTAGAATCCTGT  
>HPV1\_Mu\_9626063\_nt5449\_L1\_Tile|1  
AGCGCAGAATAAGTTCTATCTTCCTCCCCAGCCCATCACTAGAATCCTGTCCACTGATGA  
>HPV1\_Mu\_9626063\_nt5454\_L1\_Tile|1  
AGAATAAGTTCTATCTTCCTCCCCAGCCCATCACTAGAATCCTGTCCACTGATGAATATG  
>HPV1\_Mu\_9626063\_nt5459\_L1\_Tile|1  
AAGTTCTATCTTCCTCCCCAGCCCATCACTAGAATCCTGTCCACTGATGAATATGTAACC  
>HPV1\_Mu\_9626063\_nt5474\_L1\_Tile|1  
CCCCAGCCCATCACTAGAATCCTGTCCACTGATGAATATGTAACCAGAACCAATCTCTTC  
>HPV1\_Mu\_9626063\_nt5479\_L1\_Tile|1  
GCCCATCACTAGAATCCTGTCCACTGATGAATATGTAACCAGAACCAATCTCTTCTACCA  
>HPV1\_Mu\_9626063\_nt5484\_L1\_Tile|1  
TCACTAGAATCCTGTCCACTGATGAATATGTAACCAGAACCAATCTCTTCTACCATGCAA  
>HPV1\_Mu\_9626063\_nt5489\_L1\_Tile|1  
AGAATCCTGTCCACTGATGAATATGTAACCAGAACCAATCTCTTCTACCATGCAACATCT  
>HPV1\_Mu\_9626063\_nt5499\_L1\_Tile|1  
CCACTGATGAATATGTAACCAGAACCAATCTCTTCTACCATGCAACATCTGAACGTCTAC  
>HPV1\_Mu\_9626063\_nt5504\_L1\_Tile|1  
GATGAATATGTAACCAGAACCAATCTCTTCTACCATGCAACATCTGAACGTCTACTGCTG  
>HPV1\_Mu\_9626063\_nt5509\_L1\_Tile|1  
ATATGTAACCAGAACCAATCTCTTCTACCATGCAACATCTGAACGTCTACTGCTGGTCGG  
>HPV1\_Mu\_9626063\_nt5514\_L1\_Tile|1  
TAACCAGAACCAATCTCTTCTACCATGCAACATCTGAACGTCTACTGCTGGTCGGACATC  
>HPV1\_Mu\_9626063\_nt5529\_L1\_Tile|1  
TCTTCTACCATGCAACATCTGAACGTCTACTGCTGGTCGGACATCCTTTGTTTGAGATCT  
>HPV1\_Mu\_9626063\_nt5534\_L1\_Tile|1  
TACCATGCAACATCTGAACGTCTACTGCTGGTCGGACATCCTTTGTTTGAGATCTCCAGT  
>HPV1\_Mu\_9626063\_nt5539\_L1\_Tile|1  
TGCAACATCTGAACGTCTACTGCTGGTCGGACATCCTTTGTTTGAGATCTCCAGTAATCA  
>HPV1\_Mu\_9626063\_nt5544\_L1\_Tile|1  
CATCTGAACGTCTACTGCTGGTCGGACATCCTTTGTTTGAGATCTCCAGTAATCAAACCTG  
>HPV1\_Mu\_9626063\_nt5549\_L1\_Tile|1  
GAACGTCTACTGCTGGTCGGACATCCTTTGTTTGAGATCTCCAGTAATCAAACCTGTAAC  
>HPV1\_Mu\_9626063\_nt5554\_L1\_Tile|1  
TCTACTGCTGGTCGGACATCCTTTGTTTGAGATCTCCAGTAATCAAACCTGTAACCTATACC  
>HPV1\_Mu\_9626063\_nt5559\_L1\_Tile|1  
TGCTGGTCGGACATCCTTTGTTTGAGATCTCCAGTAATCAAACCTGTAACCTATACCAAAAG  
>HPV1\_Mu\_9626063\_nt5564\_L1\_Tile|1  
GTCGGACATCCTTTGTTTGAGATCTCCAGTAATCAAACCTGTAACCTATACCAAAAGTGTCA  
>HPV1\_Mu\_9626063\_nt5579\_L1\_Tile|1  
TTTGAGATCTCCAGTAATCAAACCTGTAACCTATACCAAAAGTGTACCAAAATGCATTTAGA  
>HPV1\_Mu\_9626063\_nt5584\_L1\_Tile|1  
GATCTCCAGTAATCAAACCTGTAACCTATACCAAAAGTGTACCAAAATGCATTTAGAGTTTT



>HPV1\_Mu\_9626063\_nt5594\_L1\_Tile|1  
AATCAAAGTGTAACTATACCAAAAGTGTACCAAATGCATTTAGAGTTTTAGGGTGCGT  
>HPV1\_Mu\_9626063\_nt5599\_L1\_Tile|1  
AACTGTAACTATACCAAAAGTGTACCAAATGCATTTAGAGTTTTAGGGTGCGTTTTGC  
>HPV1\_Mu\_9626063\_nt5604\_L1\_Tile|1  
TAAGTATACCAAAAGTGTACCAAATGCATTTAGAGTTTTAGGGTGCGTTTGCTGATC  
>HPV1\_Mu\_9626063\_nt5609\_L1\_Tile|1  
ATACCAAAAGTGTACCAAATGCATTTAGAGTTTTAGGGTGCGTTTGCTGATCCAAAT  
>HPV1\_Mu\_9626063\_nt5614\_L1\_Tile|1  
AAAAGTGTACCAAATGCATTTAGAGTTTTAGGGTGCGTTTGCTGATCCAAATAGATT  
>HPV1\_Mu\_9626063\_nt5644\_L1\_Tile|1  
TAGGGTGCGTTTGCTGATCCAAATAGATTTGCATTTGGGGATAAGGCAATTTTAAATCC  
>HPV1\_Mu\_9626063\_nt5729\_L1\_Tile|1  
CTAAGAGGGATAGAGATAGGTAGAGGCCAGCCTTTAGGTATAGGAATAACGGGCCACCCT  
>HPV1\_Mu\_9626063\_nt5734\_L1\_Tile|1  
AGGGATAGAGATAGGTAGAGGCCAGCCTTTAGGTATAGGAATAACGGGCCACCCTCTTTT  
>HPV1\_Mu\_9626063\_nt5739\_L1\_Tile|1  
TAGAGATAGGTAGAGGCCAGCCTTTAGGTATAGGAATAACGGGCCACCCTCTTTTAAATA  
>HPV1\_Mu\_9626063\_nt5744\_L1\_Tile|1  
ATAGGTAGAGGCCAGCCTTTAGGTATAGGAATAACGGGCCACCCTCTTTTAAATAAGTTA  
>HPV1\_Mu\_9626063\_nt5754\_L1\_Tile|1  
GCCAGCCTTTAGGTATAGGAATAACGGGCCACCCTCTTTTAAATAAGTTAGATGATGCAG  
>HPV1\_Mu\_9626063\_nt5759\_L1\_Tile|1  
CCTTTAGGTATAGGAATAACGGGCCACCCTCTTTTAAATAAGTTAGATGATGCAGAAAAT  
>HPV1\_Mu\_9626063\_nt5764\_L1\_Tile|1  
AGGTATAGGAATAACGGGCCACCCTCTTTTAAATAAGTTAGATGATGCAGAAAATCCAAC  
>HPV1\_Mu\_9626063\_nt5769\_L1\_Tile|1  
TAGGAATAACGGGCCACCCTCTTTTAAATAAGTTAGATGATGCAGAAAATCCAACAAATT  
>HPV1\_Mu\_9626063\_nt5774\_L1\_Tile|1  
ATAACGGGCCACCCTCTTTTAAATAAGTTAGATGATGCAGAAAATCCAACAAATTATATT  
>HPV1\_Mu\_9626063\_nt5784\_L1\_Tile|1  
ACCCTCTTTTAAATAAGTTAGATGATGCAGAAAATCCAACAAATTATATTAATACTCATG  
>HPV1\_Mu\_9626063\_nt5789\_L1\_Tile|1  
CTTTTAAATAAGTTAGATGATGCAGAAAATCCAACAAATTATATTAATACTCATGCAAAT  
>HPV1\_Mu\_9626063\_nt5794\_L1\_Tile|1  
AAATAAGTTAGATGATGCAGAAAATCCAACAAATTATATTAATACTCATGCAAATGGAGA  
>HPV1\_Mu\_9626063\_nt5799\_L1\_Tile|1  
AGTTAGATGATGCAGAAAATCCAACAAATTATATTAATACTCATGCAAATGGAGATTCTA  
>HPV1\_Mu\_9626063\_nt5809\_L1\_Tile|1  
TGCAGAAAATCCAACAAATTATATTAATACTCATGCAAATGGAGATTCTAGACAAAATAC  
>HPV1\_Mu\_9626063\_nt5819\_L1\_Tile|1  
CCAACAAATTATATTAATACTCATGCAAATGGAGATTCTAGACAAAATACTGCTTTTGAT  
>HPV1\_Mu\_9626063\_nt5844\_L1\_Tile|1  
CAAATGGAGATTCTAGACAAAATACTGCTTTTGATGCAAAACAGACACAAATGTTTCCTCG  
>HPV1\_Mu\_9626063\_nt5849\_L1\_Tile|1  
GGAGATTCTAGACAAAATACTGCTTTTGATGCAAAACAGACACAAATGTTTCCTCGTCGGC  
>HPV1\_Mu\_9626063\_nt5864\_L1\_Tile|1  
AATACTGCTTTTGATGCAAAACAGACACAAATGTTTCCTCGTCGGCTGTACTCCTGCTTCA  
>HPV1\_Mu\_9626063\_nt5874\_L1\_Tile|1  
TTGATGCAAAACAGACACAAATGTTTCCTCGTCGGCTGTACTCCTGCTTCAGGTGAACACT  
>HPV1\_Mu\_9626063\_nt5884\_L1\_Tile|1  
ACAGACACAAATGTTTCCTCGTCGGCTGTACTCCTGCTTCAGGTGAACACTGGACAAGTAG  
>HPV1\_Mu\_9626063\_nt5889\_L1\_Tile|1  
CACAAATGTTTCCTCGTCGGCTGTACTCCTGCTTCAGGTGAACACTGGACAAGTAGTCGTT  
>HPV1\_Mu\_9626063\_nt5894\_L1\_Tile|1

ATGTTCTCTCGTCGGCTGTACTCCTGCTTCAGGTGAACACTGGACAAGTAGTCGTTGCCCCA  
>HPV1\_Mu\_9626063\_nt5904\_L1\_Tile|1  
TCGGCTGTACTCCTGCTTCAGGTGAACACTGGACAAGTAGTCGTTGCCCAGGGGAACAAG  
>HPV1\_Mu\_9626063\_nt5909\_L1\_Tile|1  
TGTACTCCTGCTTCAGGTGAACACTGGACAAGTAGTCGTTGCCCAGGGGAACAAGTGAAA  
>HPV1\_Mu\_9626063\_nt5914\_L1\_Tile|1  
TCCTGCTTCAGGTGAACACTGGACAAGTAGTCGTTGCCCAGGGGAACAAGTGAACTTGG  
>HPV1\_Mu\_9626063\_nt5929\_L1\_Tile|1  
ACACTGGACAAGTAGTCGTTGCCCAGGGGAACAAGTGAACTTGGGGACTGCCCCAGGGT  
>HPV1\_Mu\_9626063\_nt5954\_L1\_Tile|1  
GGGGAACAAGTGAACTTGGGGACTGCCCCAGGGTGCAAATGATAGAGTCTGTCATAGAA  
>HPV1\_Mu\_9626063\_nt5964\_L1\_Tile|1  
TGAACTTGGGGACTGCCCCAGGGTGCAAATGATAGAGTCTGTCATAGAAGATGGTGACA  
>HPV1\_Mu\_9626063\_nt5974\_L1\_Tile|1  
GGACTGCCCCAGGGTGCAAATGATAGAGTCTGTCATAGAAGATGGTGACATGATGGATAT  
>HPV1\_Mu\_9626063\_nt6044\_L1\_Tile|1  
GCTATGGATTTTGCTGCTTTACAGCAAGACAAGTCTGATGTCCCTTTAGATGTTGTTCAA  
>HPV1\_Mu\_9626063\_nt6049\_L1\_Tile|1  
GGATTTTGCTGCTTTACAGCAAGACAAGTCTGATGTCCCTTTAGATGTTGTTCAAGCAAC  
>HPV1\_Mu\_9626063\_nt6079\_L1\_Tile|1  
TGATGTCCCTTTAGATGTTGTTCAAGCAACATGCAAATATCCTGATTATATCAGAATGAA  
>HPV1\_Mu\_9626063\_nt6084\_L1\_Tile|1  
TCCCTTTAGATGTTGTTCAAGCAACATGCAAATATCCTGATTATATCAGAATGAACCATG  
>HPV1\_Mu\_9626063\_nt6089\_L1\_Tile|1  
TTAGATGTTGTTCAAGCAACATGCAAATATCCTGATTATATCAGAATGAACCATGAAGCC  
>HPV1\_Mu\_9626063\_nt6099\_L1\_Tile|1  
TTCAAGCAACATGCAAATATCCTGATTATATCAGAATGAACCATGAAGCCTATGGCAACT  
>HPV1\_Mu\_9626063\_nt6104\_L1\_Tile|1  
GCAACATGCAAATATCCTGATTATATCAGAATGAACCATGAAGCCTATGGCAACTCTATG  
>HPV1\_Mu\_9626063\_nt6114\_L1\_Tile|1  
AATATCCTGATTATATCAGAATGAACCATGAAGCCTATGGCAACTCTATGTTTTTTTTTTG  
>HPV1\_Mu\_9626063\_nt6119\_L1\_Tile|1  
CCTGATTATATCAGAATGAACCATGAAGCCTATGGCAACTCTATGTTTTTTTTTTGCACGT  
>HPV1\_Mu\_9626063\_nt6129\_L1\_Tile|1  
TCAGAATGAACCATGAAGCCTATGGCAACTCTATGTTTTTTTTTTGCACGTCGCGAGCAAA  
>HPV1\_Mu\_9626063\_nt6134\_L1\_Tile|1  
ATGAACCATGAAGCCTATGGCAACTCTATGTTTTTTTTTTGCACGTCGCGAGCAAATGTAT  
>HPV1\_Mu\_9626063\_nt6139\_L1\_Tile|1  
CCATGAAGCCTATGGCAACTCTATGTTTTTTTTTTGCACGTCGCGAGCAAATGTATACCAG  
>HPV1\_Mu\_9626063\_nt6184\_L1\_Tile|1  
GCAAATGTATACCAGGCACTTTTTTACTCGCGGGGGTTCGGTGGGTGATAAGGAGGCAGT  
>HPV1\_Mu\_9626063\_nt6194\_L1\_Tile|1  
ACCAGGCACTTTTTTACTCGCGGGGGTTCGGTGGGTGATAAGGAGGCAGTCCCACAAAGC  
>HPV1\_Mu\_9626063\_nt6199\_L1\_Tile|1  
GCACTTTTTTACTCGCGGGGGTTCGGTGGGTGATAAGGAGGCAGTCCCACAAAGCCTGTA  
>HPV1\_Mu\_9626063\_nt6209\_L1\_Tile|1  
ACTCGCGGGGGTTCGGTGGGTGATAAGGAGGCAGTCCCACAAAGCCTGTATTTAACAGCA  
>HPV1\_Mu\_9626063\_nt6224\_L1\_Tile|1  
GTGGGTGATAAGGAGGCAGTCCCACAAAGCCTGTATTTAACAGCAGATGCTGAACCAAGA  
>HPV1\_Mu\_9626063\_nt6229\_L1\_Tile|1  
TGATAAGGAGGCAGTCCCACAAAGCCTGTATTTAACAGCAGATGCTGAACCAAGAACAAC  
>HPV1\_Mu\_9626063\_nt6239\_L1\_Tile|1  
GCAGTCCCACAAAGCCTGTATTTAACAGCAGATGCTGAACCAAGAACAACCTTTAGCAACA  
>HPV1\_Mu\_9626063\_nt6244\_L1\_Tile|1  
CCCACAAAGCCTGTATTTAACAGCAGATGCTGAACCAAGAACAACCTTTAGCAACAACAA

>HPV1\_Mu\_9626063\_nt6249\_L1\_Tile|1  
AAAGCCTGTATTTAACAGCAGATGCTGAACCAAGAACAACCTTTAGCAACAACAAATTATG  
>HPV1\_Mu\_9626063\_nt6254\_L1\_Tile|1  
CTGTATTTAACAGCAGATGCTGAACCAAGAACAACCTTTAGCAACAACAAATTATGTAGGC  
>HPV1\_Mu\_9626063\_nt6264\_L1\_Tile|1  
CAGCAGATGCTGAACCAAGAACAACCTTTAGCAACAACAAATTATGTAGGCACACCAAGTG  
>HPV1\_Mu\_9626063\_nt6269\_L1\_Tile|1  
GATGCTGAACCAAGAACAACCTTTAGCAACAACAAATTATGTAGGCACACCAAGTGGCTCT  
>HPV1\_Mu\_9626063\_nt6279\_L1\_Tile|1  
CAAGAACAACCTTTAGCAACAACAAATTATGTAGGCACACCAAGTGGCTCTATGGTTTCAT  
>HPV1\_Mu\_9626063\_nt6359\_L1\_Tile|1  
AGATCTTACTGGCTTCAGCGATGTCAAGGCCAGAATAATGGCATTGTGCTGGAGAAACCAG  
>HPV1\_Mu\_9626063\_nt6369\_L1\_Tile|1  
GGCTTCAGCGATGTCAAGGCCAGAATAATGGCATTGTGCTGGAGAAACCAGTTATTTATTA  
>HPV1\_Mu\_9626063\_nt6379\_L1\_Tile|1  
ATGTCAAGGCCAGAATAATGGCATTGTGCTGGAGAAACCAGTTATTTATTACAGTTGGAGA  
>HPV1\_Mu\_9626063\_nt6384\_L1\_Tile|1  
AAGGCCAGAATAATGGCATTGTGCTGGAGAAACCAGTTATTTATTACAGTTGGAGATAATA  
>HPV1\_Mu\_9626063\_nt6394\_L1\_Tile|1  
TAATGGCATTGTGCTGGAGAAACCAGTTATTTATTACAGTTGGAGATAATACCAGAGGAAC  
>HPV1\_Mu\_9626063\_nt6409\_L1\_Tile|1  
GAGAAACCAGTTATTTATTACAGTTGGAGATAATACCAGAGGAACAAGTTTATCTATCAG  
>HPV1\_Mu\_9626063\_nt6414\_L1\_Tile|1  
ACCAGTTATTTATTACAGTTGGAGATAATACCAGAGGAACAAGTTTATCTATCAGTATGA  
>HPV1\_Mu\_9626063\_nt6419\_L1\_Tile|1  
TTATTTATTACAGTTGGAGATAATACCAGAGGAACAAGTTTATCTATCAGTATGAAAAAC  
>HPV1\_Mu\_9626063\_nt6424\_L1\_Tile|1  
TATTACAGTTGGAGATAATACCAGAGGAACAAGTTTATCTATCAGTATGAAAAACAATGC  
>HPV1\_Mu\_9626063\_nt6429\_L1\_Tile|1  
CAGTTGGAGATAATACCAGAGGAACAAGTTTATCTATCAGTATGAAAAACAATGCAAGTA  
>HPV1\_Mu\_9626063\_nt6434\_L1\_Tile|1  
GGAGATAATACCAGAGGAACAAGTTTATCTATCAGTATGAAAAACAATGCAAGTACTACA  
>HPV1\_Mu\_9626063\_nt6439\_L1\_Tile|1  
TAATACCAGAGGAACAAGTTTATCTATCAGTATGAAAAACAATGCAAGTACTACATATTC  
>HPV1\_Mu\_9626063\_nt6444\_L1\_Tile|1  
CCAGAGGAACAAGTTTATCTATCAGTATGAAAAACAATGCAAGTACTACATATTTCCAATG  
>HPV1\_Mu\_9626063\_nt6449\_L1\_Tile|1  
GGAACAAGTTTATCTATCAGTATGAAAAACAATGCAAGTACTACATATTTCCAATGCTAAT  
>HPV1\_Mu\_9626063\_nt6454\_L1\_Tile|1  
AAGTTTATCTATCAGTATGAAAAACAATGCAAGTACTACATATTTCCAATGCTAATTTTAA  
>HPV1\_Mu\_9626063\_nt6459\_L1\_Tile|1  
TATCTATCAGTATGAAAAACAATGCAAGTACTACATATTTCCAATGCTAATTTTAATGATT  
>HPV1\_Mu\_9626063\_nt6464\_L1\_Tile|1  
ATCAGTATGAAAAACAATGCAAGTACTACATATTTCCAATGCTAATTTTAATGATTTTCTA  
>HPV1\_Mu\_9626063\_nt6469\_L1\_Tile|1  
TATGAAAAACAATGCAAGTACTACATATTTCCAATGCTAATTTTAATGATTTTCTAAGACA  
>HPV1\_Mu\_9626063\_nt6474\_L1\_Tile|1  
AAAACAATGCAAGTACTACATATTTCCAATGCTAATTTTAATGATTTTCTAAGACATACTG  
>HPV1\_Mu\_9626063\_nt6479\_L1\_Tile|1  
AATGCAAGTACTACATATTTCCAATGCTAATTTTAATGATTTTCTAAGACATACTGAAGAA  
>HPV1\_Mu\_9626063\_nt6484\_L1\_Tile|1  
AAGTACTACATATTTCCAATGCTAATTTTAATGATTTTCTAAGACATACTGAAGAATTTGA  
>HPV1\_Mu\_9626063\_nt6489\_L1\_Tile|1  
CTACATATTTCCAATGCTAATTTTAATGATTTTCTAAGACATACTGAAGAATTTGATCTTT  
>HPV1\_Mu\_9626063\_nt6494\_L1\_Tile|1

TATTCCAATGCTAATTTTAATGATTTTCTAAGACATACTGAAGAATTTGATCTTTCTTTT  
>HPV1\_Mu\_9626063\_nt6499\_L1\_Tile|1  
CAATGCTAATTTTAATGATTTTCTAAGACATACTGAAGAATTTGATCTTTCTTTTATAGT  
>HPV1\_Mu\_9626063\_nt6504\_L1\_Tile|1  
CTAATTTTAATGATTTTCTAAGACATACTGAAGAATTTGATCTTTCTTTTATAGTTCAGC  
>HPV1\_Mu\_9626063\_nt6509\_L1\_Tile|1  
TTTAATGATTTTCTAAGACATACTGAAGAATTTGATCTTTCTTTTATAGTTCAGCTTTGT  
>HPV1\_Mu\_9626063\_nt6519\_L1\_Tile|1  
TTCTAAGACATACTGAAGAATTTGATCTTTCTTTTATAGTTCAGCTTTGTAAAGTAAAGT  
>HPV1\_Mu\_9626063\_nt6524\_L1\_Tile|1  
AGACATACTGAAGAATTTGATCTTTCTTTTATAGTTCAGCTTTGTAAAGTAAAGTTAACT  
>HPV1\_Mu\_9626063\_nt6529\_L1\_Tile|1  
TACTGAAGAATTTGATCTTTCTTTTATAGTTCAGCTTTGTAAAGTAAAGTTAACTCCCGA  
>HPV1\_Mu\_9626063\_nt6539\_L1\_Tile|1  
TTTGATCTTTCTTTTATAGTTCAGCTTTGTAAAGTAAAGTTAACTCCCGAAAATCTAGCC  
>HPV1\_Mu\_9626063\_nt6544\_L1\_Tile|1  
TCTTTCTTTTATAGTTCAGCTTTGTAAAGTAAAGTTAACTCCCGAAAATCTAGCCTACAT  
>HPV1\_Mu\_9626063\_nt6549\_L1\_Tile|1  
CTTTTATAGTTCAGCTTTGTAAAGTAAAGTTAACTCCCGAAAATCTAGCCTACATTCATA  
>HPV1\_Mu\_9626063\_nt6554\_L1\_Tile|1  
ATAGTTCAGCTTTGTAAAGTAAAGTTAACTCCCGAAAATCTAGCCTACATTCATACAATG  
>HPV1\_Mu\_9626063\_nt6559\_L1\_Tile|1  
TCAGCTTTGTAAAGTAAAGTTAACTCCCGAAAATCTAGCCTACATTCATACAATGGACCC  
>HPV1\_Mu\_9626063\_nt6564\_L1\_Tile|1  
TTTGTAAGTAAAGTAAAGTTAACTCCCGAAAATCTAGCCTACATTCATACAATGGACCCTAATA  
>HPV1\_Mu\_9626063\_nt6569\_L1\_Tile|1  
AAAGTAAAGTAACTCCCGAAAATCTAGCCTACATTCATACAATGGACCCTAATATTTTA  
>HPV1\_Mu\_9626063\_nt6574\_L1\_Tile|1  
AAAGTTAACTCCCGAAAATCTAGCCTACATTCATACAATGGACCCTAATATTTTAGAGGA  
>HPV1\_Mu\_9626063\_nt6579\_L1\_Tile|1  
TAACTCCCGAAAATCTAGCCTACATTCATACAATGGACCCTAATATTTTAGAGGATTGGC  
>HPV1\_Mu\_9626063\_nt6594\_L1\_Tile|1  
TAGCCTACATTCATACAATGGACCCTAATATTTTAGAGGATTGGCAACTATCTGTATCTC  
>HPV1\_Mu\_9626063\_nt6629\_L1\_Tile|1  
GAGGATTGGCAACTATCTGTATCTCAACCACCTACCAATCCTCTAGAAGATCAATATAGG  
>HPV1\_Mu\_9626063\_nt6639\_L1\_Tile|1  
AACTATCTGTATCTCAACCACCTACCAATCCTCTAGAAGATCAATATAGGTTTTTAGGGT  
>HPV1\_Mu\_9626063\_nt6644\_L1\_Tile|1  
TCTGTATCTCAACCACCTACCAATCCTCTAGAAGATCAATATAGGTTTTTAGGGTCTTCC  
>HPV1\_Mu\_9626063\_nt6649\_L1\_Tile|1  
ATCTCAACCACCTACCAATCCTCTAGAAGATCAATATAGGTTTTTAGGGTCTTCCTTGGC  
>HPV1\_Mu\_9626063\_nt6654\_L1\_Tile|1  
AACCACCTACCAATCCTCTAGAAGATCAATATAGGTTTTTAGGGTCTTCCTTGGCAGCAA  
>HPV1\_Mu\_9626063\_nt6659\_L1\_Tile|1  
CCTACCAATCCTCTAGAAGATCAATATAGGTTTTTAGGGTCTTCCTTGGCAGCAAAATGT  
>HPV1\_Mu\_9626063\_nt6664\_L1\_Tile|1  
CAATCCTCTAGAAGATCAATATAGGTTTTTAGGGTCTTCCTTGGCAGCAAAATGTCCAGA  
>HPV1\_Mu\_9626063\_nt6669\_L1\_Tile|1  
CTCTAGAAGATCAATATAGGTTTTTAGGGTCTTCCTTGGCAGCAAAATGTCCAGAACAGG  
>HPV1\_Mu\_9626063\_nt6694\_L1\_Tile|1  
AGGGTCTTCCTTGGCAGCAAAATGTCCAGAACAGGCGCCTCCTGAGCCCCAGACTGATCC  
>HPV1\_Mu\_9626063\_nt6709\_L1\_Tile|1  
AGCAAAATGTCCAGAACAGGCGCCTCCTGAGCCCCAGACTGATCCTTATAGTCAATATAA  
>HPV1\_Mu\_9626063\_nt6719\_L1\_Tile|1  
CCAGAACAGGCGCCTCCTGAGCCCCAGACTGATCCTTATAGTCAATATAAATCTGGGAA

>HPV1\_Mu\_9626063\_nt6729\_L1\_Tile|1  
CGCCTCCTGAGCCCCAGACTGATCCTTATAGTCAATATAAATTCTGGGAAGTCGATCTCA  
>HPV1\_Mu\_9626063\_nt6734\_L1\_Tile|1  
CCTGAGCCCCAGACTGATCCTTATAGTCAATATAAATTCTGGGAAGTCGATCTCACAGAA  
>HPV1\_Mu\_9626063\_nt6744\_L1\_Tile|1  
AGACTGATCCTTATAGTCAATATAAATTCTGGGAAGTCGATCTCACAGAAAGGATGTCCG  
>HPV1\_Mu\_9626063\_nt6749\_L1\_Tile|1  
GATCCTTATAGTCAATATAAATTCTGGGAAGTCGATCTCACAGAAAGGATGTCCGAACAA  
>HPV1\_Mu\_9626063\_nt6754\_L1\_Tile|1  
TTATAGTCAATATAAATTCTGGGAAGTCGATCTCACAGAAAGGATGTCCGAACAATTAGA  
>HPV1\_Mu\_9626063\_nt6759\_L1\_Tile|1  
GTCAATATAAATTCTGGGAAGTCGATCTCACAGAAAGGATGTCCGAACAATTAGACCAAT  
>HPV1\_Mu\_9626063\_nt6764\_L1\_Tile|1  
TATAAATTCTGGGAAGTCGATCTCACAGAAAGGATGTCCGAACAATTAGACCAATTTCCA  
>HPV1\_Mu\_9626063\_nt6769\_L1\_Tile|1  
ATTCTGGGAAGTCGATCTCACAGAAAGGATGTCCGAACAATTAGACCAATTTCCACTAGG  
>HPV1\_Mu\_9626063\_nt6774\_L1\_Tile|1  
GGGAAGTCGATCTCACAGAAAGGATGTCCGAACAATTAGACCAATTTCCACTAGGAAGGA  
>HPV1\_Mu\_9626063\_nt6779\_L1\_Tile|1  
GTCGATCTCACAGAAAGGATGTCCGAACAATTAGACCAATTTCCACTAGGAAGGAAATTT  
>HPV1\_Mu\_9626063\_nt6784\_L1\_Tile|1  
TCTCACAGAAAGGATGTCCGAACAATTAGACCAATTTCCACTAGGAAGGAAATTTCTATA  
>HPV1\_Mu\_9626063\_nt6789\_L1\_Tile|1  
CAGAAAGGATGTCCGAACAATTAGACCAATTTCCACTAGGAAGGAAATTTCTATATCAAA  
>HPV1\_Mu\_9626063\_nt6794\_L1\_Tile|1  
AGGATGTCCGAACAATTAGACCAATTTCCACTAGGAAGGAAATTTCTATATCAAAGTGGC  
>HPV1\_Mu\_9626063\_nt6799\_L1\_Tile|1  
GTCCGAACAATTAGACCAATTTCCACTAGGAAGGAAATTTCTATATCAAAGTGGCATGAC  
>HPV1\_Mu\_9626063\_nt6804\_L1\_Tile|1  
AACAAATTAGACCAATTTCCACTAGGAAGGAAATTTCTATATCAAAGTGGCATGACACAAC  
>HPV1\_Mu\_9626063\_nt6809\_L1\_Tile|1  
TTAGACCAATTTCCACTAGGAAGGAAATTTCTATATCAAAGTGGCATGACACAACGTACT  
>HPV1\_Mu\_9626063\_nt6814\_L1\_Tile|1  
CCAATTTCCACTAGGAAGGAAATTTCTATATCAAAGTGGCATGACACAACGTACTGCTAC  
>HPV1\_Mu\_9626063\_nt6819\_L1\_Tile|1  
TTCCACTAGGAAGGAAATTTCTATATCAAAGTGGCATGACACAACGTACTGCTACTAGTT  
>HPV1\_Mu\_9626063\_nt6824\_L1\_Tile|1  
CTAGGAAGGAAATTTCTATATCAAAGTGGCATGACACAACGTACTGCTACTAGTTCCACC  
>HPV1\_Mu\_9626063\_nt6834\_L1\_Tile|1  
AATTTCTATATCAAAGTGGCATGACACAACGTACTGCTACTAGTTCCACCACAAAGCGCA  
>HPV1\_Mu\_9626063\_nt6839\_L1\_Tile|1  
CTATATCAAAGTGGCATGACACAACGTACTGCTACTAGTTCCACCACAAAGCGCAAAACA  
>HPV1\_Mu\_9626063\_nt6844\_L1\_Tile|1  
TCAAAGTGGCATGACACAACGTACTGCTACTAGTTCCACCACAAAGCGCAAAACAGTGCG  
>HPV1\_Mu\_9626063\_nt6849\_L1\_Tile|1  
GTGGCATGACACAACGTACTGCTACTAGTTCCACCACAAAGCGCAAAACAGTGCGTGTAT  
>HPV1\_Mu\_9626063\_nt6854\_L1\_Tile|1  
ATGACACAACGTACTGCTACTAGTTCCACCACAAAGCGCAAAACAGTGCGTGTATCTACG  
>HPV1\_Mu\_9626063\_nt6859\_L1\_Tile|1  
ACAACGTACTGCTACTAGTTCCACCACAAAGCGCAAAACAGTGCGTGTATCTACGTCAGC  
>HPV1\_Mu\_9626063\_nt6864\_L1\_Tile|1  
GTACTGCTACTAGTTCCACCACAAAGCGCAAAACAGTGCGTGTATCTACGTCAGCCAAGC  
>HPV1\_Mu\_9626063\_nt6879\_L1\_Tile|1  
CCACCACAAAGCGCAAAACAGTGCGTGTATCTACGTCAGCCAAGCGCAGGCGTAAGGCTT  
>HPV1\_Mu\_9626063\_nt6881\_L1\_Tile|1

ACCACAAAGCGCAAAACAGTGCGTGTATCTACGTCAGCCAAGCGCAGGCGTAAGGCTTAG  
>HPV2\_Alpha\_9626032\_nt5908\_L1\_Tile|1  
TCTAGGCTTCTCACTGTGGGTCATCCATATTACTCTATAAAGAAGAGTAATAATAAGGTG  
>HPV2\_Alpha\_9626032\_nt5913\_L1\_Tile|1  
GCTTCTCACTGTGGGTCATCCATATTACTCTATAAAGAAGAGTAATAATAAGGTGGCTGT  
>HPV2\_Alpha\_9626032\_nt6793\_L1\_Tile|1  
ACTAATGTATCTCTGTGTGCCACTGAGGCGTCTGATACTAATTATAAGGCTACCAATTTT  
>HPV2\_Alpha\_9626032\_nt7193\_L1\_Tile|1  
CTATGCCTACCGTGTCTCGCAAGCGCGCCGCTGTTTCGGGGACCACGCCGCCACTAGTA  
>HPV2\_Alpha\_9626032\_nt7198\_L1\_Tile|1  
CCTACCGTGTCTCGCAAGCGCGCCGCTGTTTCGGGGACCACGCCGCCACTAGTAAACGA  
>HPV3\_Alpha\_397005\_nt5878\_L1\_Tile|1  
CTGACCGTGGGTCATCCTTATTTTGCTATCCCCAAATCTTCTAATTCCAAGATGGATATT  
>HPV3\_Alpha\_397005\_nt5883\_L1\_Tile|1  
CGTGGGTCATCCTTATTTTGCTATCCCCAAATCTTCTAATTCCAAGATGGATATTCCTAA  
>HPV3\_Alpha\_397005\_nt5903\_L1\_Tile|1  
CTATCCCCAAATCTTCTAATTCCAAGATGGATATTCCTAAGGTGTCCGCCTTTCAATATA  
>HPV3\_Alpha\_397005\_nt5908\_L1\_Tile|1  
CCCAAATCTTCTAATTCCAAGATGGATATTCCTAAGGTGTCCGCCTTTCAATATAGAGTG  
>HPV3\_Alpha\_397005\_nt6273\_L1\_Tile|1  
ATGTAAGCAGAATGCGTCACCGGGTGATTGTCTCCTCTAGAGCTTATTACTGCACCTAT  
>HPV3\_Alpha\_397005\_nt6278\_L1\_Tile|1  
AGCAGAATGCGTCACCGGGTGATTGTCTCCTCTAGAGCTTATTACTGCACCTATACAAG  
>HPV3\_Alpha\_397005\_nt6518\_L1\_Tile|1  
CAAGACATTTTCTTAACAGAGCTGGTATGGCTGGAGACACCGTGCCTGACGCGTTGTACA  
>HPV3\_Alpha\_397005\_nt6523\_L1\_Tile|1  
CATTTTCTTAACAGAGCTGGTATGGCTGGAGACACCGTGCCTGACGCGTTGTACATTAAA  
>HPV3\_Alpha\_397005\_nt6528\_L1\_Tile|1  
TCTTAACAGAGCTGGTATGGCTGGAGACACCGTGCCTGACGCGTTGTACATTAAAGGTGA  
>HPV3\_Alpha\_397005\_nt6533\_L1\_Tile|1  
ACAGAGCTGGTATGGCTGGAGACACCGTGCCTGACGCGTTGTACATTAAAGGTGACAGTC  
>HPV3\_Alpha\_397005\_nt6538\_L1\_Tile|1  
GCTGGTATGGCTGGAGACACCGTGCCTGACGCGTTGTACATTAAAGGTGACAGTCAGAGC  
>HPV3\_Alpha\_397005\_nt6543\_L1\_Tile|1  
TATGGCTGGAGACACCGTGCCTGACGCGTTGTACATTAAAGGTGACAGTCAGAGCGGCGG  
>HPV3\_Alpha\_397005\_nt6553\_L1\_Tile|1  
GACACCGTGCTGACGCGTTGTACATTAAAGGTGACAGTCAGAGCGGCGGTCTGGGATAAA  
>HPV3\_Alpha\_397005\_nt6563\_L1\_Tile|1  
CTGACGCGTTGTACATTAAAGGTGACAGTCAGAGCGGCGGTCTGGGATAAAAATTGGTAGTG  
>HPV3\_Alpha\_397005\_nt6783\_L1\_Tile|1  
GACATTGTGTGTTTCTACTGAAACCTCGGCTACATATGATGCTACTAAATTTAAAGAGTA  
>HPV3\_Alpha\_397005\_nt6788\_L1\_Tile|1  
TGTGTGTTTCTACTGAAACCTCGGCTACATATGATGCTACTAAATTTAAAGAGTATTTAA  
>HPV3\_Alpha\_397005\_nt6793\_L1\_Tile|1  
GTTTCTACTGAAACCTCGGCTACATATGATGCTACTAAATTTAAAGAGTATTTAAGACAC  
>HPV3\_Alpha\_397005\_nt7003\_L1\_Tile|1  
ACCTATAGATTTTAACTTCCTCTGCCATTACCTGCCAGAAAGATGCACCTCCCACTGAG  
>HPV3\_Alpha\_397005\_nt7028\_L1\_Tile|1  
CCATTACCTGCCAGAAAGATGCACCTCCCACTGAGAAGCAAGACCCCTACGCCAAACTAA  
>HPV3\_Alpha\_397005\_nt7103\_L1\_Tile|1  
ATCTTAAGGATCGTTTTTCCCTGGATCTTTTCGCAGTTCCCCCTTGGCAGGAAATTTCTCA  
>HPV3\_Alpha\_397005\_nt7118\_L1\_Tile|1  
TTTCCCTGGATCTTTTCGCAGTTCCCCCTTGGCAGGAAATTTCTCATGCAGCTCGGTGTAG  
>HPV3\_Alpha\_397005\_nt7123\_L1\_Tile|1  
CTGGATCTTTTCGCAGTTCCCCCTTGGCAGGAAATTTCTCATGCAGCTCGGTGTAGGTACC

>HPV3\_Alpha\_397005\_nt7138\_L1\_Tile|1  
TTCCCCCTTGGCAGGAAATTTCTCATGCAGCTCGGTGTAGGTACCCGCTCTAGTATATCT  
>HPV3\_Alpha\_397005\_nt7153\_L1\_Tile|1  
AAATTTCTCATGCAGCTCGGTGTAGGTACCCGCTCTAGTATATCTGTTTCGTAAACGCTCG  
>HPV3\_Alpha\_397005\_nt7173\_L1\_Tile|1  
TGTAGGTACCCGCTCTAGTATATCTGTTTCGTAAACGCTCGGCGACAACCACATCTAGAAC  
>HPV3\_Alpha\_397005\_nt7178\_L1\_Tile|1  
GTACCCGCTCTAGTATATCTGTTTCGTAAACGCTCGGCGACAACCACATCTAGAACAGCTG  
>HPV4\_Gamma\_9626597\_nt5516\_L1\_Tile|1  
GGAACCTCACAAAGTATTAGTTCTTAAGGTTTCAGGAAGTCAATTTAGAGTGTTTAGATT  
>HPV4\_Gamma\_9626597\_nt5541\_L1\_Tile|1  
AAGGTTTCAGGAAGTCAATTTAGAGTGTTTAGATTCAATTTGCCAGACCCAAACAGATTT  
>HPV4\_Gamma\_9626597\_nt5556\_L1\_Tile|1  
CAATTTAGAGTGTTTAGATTCAATTTGCCAGACCCAAACAGATTTGCTTTAATTGATAAT  
>HPV4\_Gamma\_9626597\_nt5621\_L1\_Tile|1  
TTATGATTCTGATCATGAACGCCTAGTATGGAACTGAGGGGAATAGAAATAGGAAGAGG  
>HPV4\_Gamma\_9626597\_nt5631\_L1\_Tile|1  
GATCATGAACGCCTAGTATGGAACTGAGGGGAATAGAAATAGGAAGAGGAGGACCGCTT  
>HPV4\_Gamma\_9626597\_nt5636\_L1\_Tile|1  
TGAACGCCTAGTATGGAACTGAGGGGAATAGAAATAGGAAGAGGAGGACCGCTTGGTAT  
>HPV4\_Gamma\_9626597\_nt5646\_L1\_Tile|1  
GTATGGAACTGAGGGGAATAGAAATAGGAAGAGGAGGACCGCTTGGTATAGGTACTACA  
>HPV4\_Gamma\_9626597\_nt5671\_L1\_Tile|1  
TAGGAAGAGGAGGACCGCTTGGTATAGGTACTACAGGTCATCCTTTATATAATAAGTTTG  
>HPV4\_Gamma\_9626597\_nt6071\_L1\_Tile|1  
CTATGGAGATAGCTTGTTTTCTTTGGAAGAAGAGAACAACCTATATGCCAGACATTTCTT  
>HPV4\_Gamma\_9626597\_nt6076\_L1\_Tile|1  
GAGATAGCTTGTTTTCTTTGGAAGAAGAGAACAACCTATATGCCAGACATTTCTTTGTCA  
>HPV4\_Gamma\_9626597\_nt6086\_L1\_Tile|1  
GTTTTTCTTTGGAAGAAGAGAACAACCTATATGCCAGACATTTCTTTGTCAGAGCAGGCAC  
>HPV4\_Gamma\_9626597\_nt6151\_L1\_Tile|1  
GAGATGCTCTACCAGAACCTTTTGAAGCTACCTCAGATTATTTTATTGGTGCTCAAAACC  
>HPV4\_Gamma\_9626597\_nt6156\_L1\_Tile|1  
GCTCTACCAGAACCTTTTGAAGCTACCTCAGATTATTTTATTGGTGCTCAAAACCAACAA  
>HPV4\_Gamma\_9626597\_nt6161\_L1\_Tile|1  
ACCAGAACCTTTTGAAGCTACCTCAGATTATTTTATTGGTGCTCAAAACCAACAAGATCA  
>HPV4\_Gamma\_9626597\_nt6166\_L1\_Tile|1  
AACCTTTTGAAGCTACCTCAGATTATTTTATTGGTGCTCAAAACCAACAAGATCAGTACA  
>HPV4\_Gamma\_9626597\_nt6171\_L1\_Tile|1  
TTTGAAGCTACCTCAGATTATTTTATTGGTGCTCAAAACCAACAAGATCAGTACACTTTA  
>HPV4\_Gamma\_9626597\_nt6176\_L1\_Tile|1  
AGCTACCTCAGATTATTTTATTGGTGCTCAAAACCAACAAGATCAGTACACTTTAGGACC  
>HPV4\_Gamma\_9626597\_nt6181\_L1\_Tile|1  
CCTCAGATTATTTTATTGGTGCTCAAAACCAACAAGATCAGTACACTTTAGGACCTCATA  
>HPV4\_Gamma\_9626597\_nt6186\_L1\_Tile|1  
GATTATTTTATTGGTGCTCAAAACCAACAAGATCAGTACACTTTAGGACCTCATATTTAT  
>HPV4\_Gamma\_9626597\_nt6191\_L1\_Tile|1  
TTTTATTGGTGCTCAAAACCAACAAGATCAGTACACTTTAGGACCTCATATTTATGTAGG  
>HPV4\_Gamma\_9626597\_nt6196\_L1\_Tile|1  
TTGGTGCTCAAAACCAACAAGATCAGTACACTTTAGGACCTCATATTTATGTAGGGACCC  
>HPV4\_Gamma\_9626597\_nt6206\_L1\_Tile|1  
AAACCAACAAGATCAGTACACTTTAGGACCTCATATTTATGTAGGGACCCCTAGTGGCTC  
>HPV4\_Gamma\_9626597\_nt6211\_L1\_Tile|1  
AACAAAGATCAGTACACTTTAGGACCTCATATTTATGTAGGGACCCCTAGTGGCTCTTTAG  
>HPV4\_Gamma\_9626597\_nt6216\_L1\_Tile|1

GATCAGTACACTTTAGGACCTCATATTTATGTAGGGACCCCTAGTGGCTCTTTAGTATCC  
>HPV4\_Gamma\_9626597\_nt6221\_L1\_Tile|1  
GTACACTTTAGGACCTCATATTTATGTAGGGACCCCTAGTGGCTCTTTAGTATCCAGTGA  
>HPV4\_Gamma\_9626597\_nt6226\_L1\_Tile|1  
CTTTAGGACCTCATATTTATGTAGGGACCCCTAGTGGCTCTTTAGTATCCAGTGAATCCC  
>HPV4\_Gamma\_9626597\_nt6356\_L1\_Tile|1  
GTTGTTTGTACTCTTGTAGATAACACTCATAATACAACTTTACAATTTCTGTGAAGTC  
>HPV4\_Gamma\_9626597\_nt6361\_L1\_Tile|1  
TTGTTACTCTTGTAGATAACACTCATAATACAACTTTACAATTTCTGTGAAGTCAGATG  
>HPV4\_Gamma\_9626597\_nt6366\_L1\_Tile|1  
ACTCTGTAGATAACACTCATAATACAACTTTACAATTTCTGTGAAGTCAGATGGTGCT  
>HPV4\_Gamma\_9626597\_nt6371\_L1\_Tile|1  
TGTAAGATAACACTCATAATACAACTTTACAATTTCTGTGAAGTCAGATGGTGCTAATGA  
>HPV4\_Gamma\_9626597\_nt6376\_L1\_Tile|1  
ATAACACTCATAATACAACTTTACAATTTCTGTGAAGTCAGATGGTGCTAATGACAATT  
>HPV4\_Gamma\_9626597\_nt6381\_L1\_Tile|1  
ACTCATAATACAACTTTACAATTTCTGTGAAGTCAGATGGTGCTAATGACAATTATCAG  
>HPV4\_Gamma\_9626597\_nt6386\_L1\_Tile|1  
TAATACAACTTTACAATTTCTGTGAAGTCAGATGGTGCTAATGACAATTATCAGTATAA  
>HPV4\_Gamma\_9626597\_nt6391\_L1\_Tile|1  
CAAACCTTTACAATTTCTGTGAAGTCAGATGGTGCTAATGACAATTATCAGTATAAAGCTA  
>HPV4\_Gamma\_9626597\_nt6396\_L1\_Tile|1  
TTTACAATTTCTGTGAAGTCAGATGGTGCTAATGACAATTATCAGTATAAAGCTAGTGAT  
>HPV4\_Gamma\_9626597\_nt6401\_L1\_Tile|1  
AATTTCTGTGAAGTCAGATGGTGCTAATGACAATTATCAGTATAAAGCTAGTGATTTTAA  
>HPV4\_Gamma\_9626597\_nt6406\_L1\_Tile|1  
CTGTGAAGTCAGATGGTGCTAATGACAATTATCAGTATAAAGCTAGTGATTTTAAACAGT  
>HPV4\_Gamma\_9626597\_nt6411\_L1\_Tile|1  
AAGTCAGATGGTGCTAATGACAATTATCAGTATAAAGCTAGTGATTTTAAACAGTACCTC  
>HPV4\_Gamma\_9626597\_nt6416\_L1\_Tile|1  
AGATGGTGCTAATGACAATTATCAGTATAAAGCTAGTGATTTTAAACAGTACCTCAGACA  
>HPV4\_Gamma\_9626597\_nt6626\_L1\_Tile|1  
TCAATATAGATTTTTGCAATCTAGAGCTACAAGATGCCCTACACAGACCCCTGCAACTGA  
>HPV4\_Gamma\_9626597\_nt6631\_L1\_Tile|1  
ATAGATTTTTGCAATCTAGAGCTACAAGATGCCCTACACAGACCCCTGCAACTGAAAAAG  
>HPV4\_Gamma\_9626597\_nt6636\_L1\_Tile|1  
TTTTTGCAATCTAGAGCTACAAGATGCCCTACACAGACCCCTGCAACTGAAAAAGAAGAT  
>HPV4\_Gamma\_9626597\_nt6641\_L1\_Tile|1  
GCAATCTAGAGCTACAAGATGCCCTACACAGACCCCTGCAACTGAAAAAGAAGATCCATA  
>HPV4\_Gamma\_9626597\_nt6646\_L1\_Tile|1  
CTAGAGCTACAAGATGCCCTACACAGACCCCTGCAACTGAAAAAGAAGATCCATATAAAG  
>HPV4\_Gamma\_9626597\_nt6651\_L1\_Tile|1  
GCTACAAGATGCCCTACACAGACCCCTGCAACTGAAAAAGAAGATCCATATAAAGATTTG  
>HPV4\_Gamma\_9626597\_nt6656\_L1\_Tile|1  
AAGATGCCCTACACAGACCCCTGCAACTGAAAAAGAAGATCCATATAAAGATTTGTCTTT  
>HPV4\_Gamma\_9626597\_nt6771\_L1\_Tile|1  
GGCAGGCGGTTTTATATCAAAGTGGTTAATTAATGGTTCTCTAAAACGTAAAAGAATA  
>HPV4\_Gamma\_9626597\_nt6776\_L1\_Tile|1  
GCGGTTTTATATCAAAGTGGTTAATTAATGGTTCTCTAAAACGTAAAAGAATAATAAG  
>HPV4\_Gamma\_9626597\_nt6781\_L1\_Tile|1  
TTTTATATCAAAGTGGTTAATTAATGGTTCTCTAAAACGTAAAAGAATAATAAGTTCTT  
>HPV4\_Gamma\_9626597\_nt6786\_L1\_Tile|1  
TATCAAAGTGGTTAATTAATGGTTCTCTAAAACGTAAAAGAATAATAAGTTCTTCTCAT  
>HPV4\_Gamma\_9626597\_nt6791\_L1\_Tile|1  
AAGTGGTTTAAATTAATGGTTCTCTAAAACGTAAAAGAATAATAAGTTCTTCTCATGCACA



>HPV4\_Gamma\_9626597\_nt6801\_L1\_Tile|1  
ATTAATGGTTCTCTAAAACGTAAAAGAATAATAAGTTCTTCTCATGCACAACTAATACC  
>HPV4\_Gamma\_9626597\_nt6811\_L1\_Tile|1  
CTCTAAAACGTAAAAGAATAATAAGTTCTTCTCATGCACAACTAATACCAAACGTTCTG  
>HPV4\_Gamma\_9626597\_nt6816\_L1\_Tile|1  
AAACGTAAAAGAATAATAAGTTCTTCTCATGCACAACTAATACCAAACGTTCTGCCAAA  
>HPV5\_Beta\_9627145\_nt6278\_L1\_Tile|1  
CACCCCTTATTTCAATAAAGTAAAAGATACAGAAAACAGTAATGCATACATAACATTTTCT  
>HPV5\_Beta\_9627145\_nt6283\_L1\_Tile|1  
TTATTTCAATAAAGTAAAAGATACAGAAAACAGTAATGCATACATAACATTTTCTAAAGA  
>HPV5\_Beta\_9627145\_nt6513\_L1\_Tile|1  
ATATGGCAGACATAGGTTTTGGGAACATGAATTTTAAGGCACTTCAAGATAGTAGATCAG  
>HPV5\_Beta\_9627145\_nt6518\_L1\_Tile|1  
GCAGACATAGGTTTTGGGAACATGAATTTTAAGGCACTTCAAGATAGTAGATCAGATGTC  
>HPV5\_Beta\_9627145\_nt6523\_L1\_Tile|1  
CATAGGTTTTGGGAACATGAATTTTAAGGCACTTCAAGATAGTAGATCAGATGTCAGTTT  
>HPV5\_Beta\_9627145\_nt6533\_L1\_Tile|1  
GGGAACATGAATTTTAAGGCACTTCAAGATAGTAGATCAGATGTCAGTTTAGACATCGTC  
>HPV5\_Beta\_9627145\_nt6538\_L1\_Tile|1  
CATGAATTTTAAGGCACTTCAAGATAGTAGATCAGATGTCAGTTTAGACATCGTCAATGA  
>HPV5\_Beta\_9627145\_nt6958\_L1\_Tile|1  
CAACACAAGAAATACTAATTTTCAGTATTTCTGTATATAATCAGGCTGGAGCACTAAAAGA  
>HPV5\_Beta\_9627145\_nt6963\_L1\_Tile|1  
CAAGAAATACTAATTTTCAGTATTTCTGTATATAATCAGGCTGGAGCACTAAAAGATGTTG  
>HPV5\_Beta\_9627145\_nt6968\_L1\_Tile|1  
AATACTAATTTTCAGTATTTCTGTATATAATCAGGCTGGAGCACTAAAAGATGTTGCAGAC  
>HPV5\_Beta\_9627145\_nt6988\_L1\_Tile|1  
TGTATATAATCAGGCTGGAGCACTAAAAGATGTTGCAGACTATAATGCAGATCAATTTAG  
>HPV5\_Beta\_9627145\_nt6993\_L1\_Tile|1  
ATAATCAGGCTGGAGCACTAAAAGATGTTGCAGACTATAATGCAGATCAATTTAGAGAAT  
>HPV5\_Beta\_9627145\_nt6998\_L1\_Tile|1  
CAGGCTGGAGCACTAAAAGATGTTGCAGACTATAATGCAGATCAATTTAGAGAATATCAA  
>HPV5\_Beta\_9627145\_nt7003\_L1\_Tile|1  
TGGAGCACTAAAAGATGTTGCAGACTATAATGCAGATCAATTTAGAGAATATCAAAGACA  
>HPV5\_Beta\_9627145\_nt7008\_L1\_Tile|1  
CACTAAAAGATGTTGCAGACTATAATGCAGATCAATTTAGAGAATATCAAAGACATGTAG  
>HPV5\_Beta\_9627145\_nt7068\_L1\_Tile|1  
AAGAATATGAAATATCTTTAATTCTACAACCTCTGTAAGGTTCCCTTTAAAGGCACAGGTAT  
>HPV5\_Beta\_9627145\_nt7073\_L1\_Tile|1  
TATGAAATATCTTTAATTCTACAACCTCTGTAAGGTTCCCTTTAAAGGCACAGGTATTGGCA  
>HPV5\_Beta\_9627145\_nt7078\_L1\_Tile|1  
AATATCTTTAATTCTACAACCTCTGTAAGGTTCCCTTTAAAGGCACAGGTATTGGCACAGAT  
>HPV5\_Beta\_9627145\_nt7223\_L1\_Tile|1  
TATATTGACTCTTTGGCTACACGGTGTCCAGATAAGAATCCTCCGAAAGAAAAGGAAGAC  
>HPV6\_Alpha\_6002612\_nt5926\_L1\_Tile|1  
CATCCTTATTTTCCATAAAACGGGCTAACAAAACCTGTTGTGCCAAAGGTGTCAGGATAT  
>HPV6\_Alpha\_6002612\_nt6131\_L1\_Tile|1  
TAAGTGGACATCCTTTCCATAAATAAATATGATGATGTTGAAAATTCAGGGAGTGGTGGTA  
>HPV6\_Alpha\_6002612\_nt6141\_L1\_Tile|1  
TCCTTTCCATAAATAAATATGATGATGTTGAAAATTCAGGGAGTGGTGGTAACCCCTGGACA  
>HPV6\_Alpha\_6002612\_nt6146\_L1\_Tile|1  
TCCTAAATAAATAAATATGATGATGTTGAAAATTCAGGGAGTGGTGGTAACCCCTGGACAGGATA  
>HPV6\_Alpha\_6002612\_nt6151\_L1\_Tile|1  
AATAAATATGATGATGTTGAAAATTCAGGGAGTGGTGGTAACCCCTGGACAGGATAACAGG  
>HPV6\_Alpha\_6002612\_nt6266\_L1\_Tile|1

CCCCTTTGGGCGAGCATTGGGGTAAAGGTAAACAGTGTACTAATACACCTGTACAGGCTG  
>HPV6\_Alpha\_6002612\_nt6561\_L1\_Tile|1  
TAACAGGGCTGGCGAGGTGGGGGAACCTGTGCCTGATACTCTTATAATTAAGGGTAGTGG  
>HPV6\_Alpha\_6002612\_nt6566\_L1\_Tile|1  
GGGCTGGCGAGGTGGGGGAACCTGTGCCTGATACTCTTATAATTAAGGGTAGTGGAAATC  
>HPV6\_Alpha\_6002612\_nt6571\_L1\_Tile|1  
GGCGAGGTGGGGGAACCTGTGCCTGATACTCTTATAATTAAGGGTAGTGGAAATCGAACG  
>HPV6\_Alpha\_6002612\_nt6591\_L1\_Tile|1  
GCCTGATACTCTTATAATTAAGGGTAGTGGAAATCGAACGTCTGTAGGGAGTAGTATATA  
>HPV6\_Alpha\_6002612\_nt6596\_L1\_Tile|1  
ATACTCTTATAATTAAGGGTAGTGGAAATCGAACGTCTGTAGGGAGTAGTATATATGTTA  
>HPV6\_Alpha\_6002612\_nt6601\_L1\_Tile|1  
CTTATAATTAAGGGTAGTGGAAATCGAACGTCTGTAGGGAGTAGTATATATGTTAACACC  
>HPV6\_Alpha\_6002612\_nt6611\_L1\_Tile|1  
AGGGTAGTGGAAATCGAACGTCTGTAGGGAGTAGTATATATGTTAACACCCCAAGCGGCT  
>HPV6\_Alpha\_6002612\_nt6616\_L1\_Tile|1  
AGTGGAAATCGAACGTCTGTAGGGAGTAGTATATATGTTAACACCCCAAGCGGCTCTTTG  
>HPV6\_Alpha\_6002612\_nt6621\_L1\_Tile|1  
AAATCGAACGTCTGTAGGGAGTAGTATATATGTTAACACCCCAAGCGGCTCTTTGGTGTC  
>HPV6\_Alpha\_6002612\_nt6791\_L1\_Tile|1  
GCAGTACCAACATGACATTATGTGCATCCGTAACCTACATCTTCCACATACACCAATTCTG  
>HPV6\_Alpha\_6002612\_nt6796\_L1\_Tile|1  
ACCAACATGACATTATGTGCATCCGTAACCTACATCTTCCACATACACCAATTCTGATTAT  
>HPV6\_Alpha\_6002612\_nt6801\_L1\_Tile|1  
CATGACATTATGTGCATCCGTAACCTACATCTTCCACATACACCAATTCTGATTATAAAGA  
>HPV6\_Alpha\_6002612\_nt6806\_L1\_Tile|1  
CATTATGTGCATCCGTAACCTACATCTTCCACATACACCAATTCTGATTATAAAGAGTACA  
>HPV6\_Alpha\_6002612\_nt6811\_L1\_Tile|1  
TGTGCATCCGTAACCTACATCTTCCACATACACCAATTCTGATTATAAAGAGTACATGCGT  
>HPV6\_Alpha\_6002612\_nt6816\_L1\_Tile|1  
ATCCGTAACCTACATCTTCCACATACACCAATTCTGATTATAAAGAGTACATGCGTCATGT  
>HPV6\_Alpha\_6002612\_nt6821\_L1\_Tile|1  
TAACCTACATCTTCCACATACACCAATTCTGATTATAAAGAGTACATGCGTCATGTGGAAG  
>HPV6\_Alpha\_6002612\_nt6826\_L1\_Tile|1  
ACATCTTCCACATACACCAATTCTGATTATAAAGAGTACATGCGTCATGTGGAAGAGTAT  
>HPV6\_Alpha\_6002612\_nt7171\_L1\_Tile|1  
CGCAAGTTTTTTGTTACAAAGTGGATATAGGGGACGGTCCTCTATTTCGTACCGGTGTTAAG  
>HPV6\_Alpha\_6002612\_nt7191\_L1\_Tile|1  
TGGATATAGGGGACGGTCCTCTATTTCGTACCGGTGTTAAGCGCCCTGCTGTTTCCAAAGC  
>HPV7\_Alpha\_9627389\_nt5904\_L1\_Tile|1  
GCAGGTAGTACCAGGTTATTAACCATAGGACATCCATATTTTGAATTGAAAAAGCCTAAT  
>HPV7\_Alpha\_9627389\_nt5909\_L1\_Tile|1  
TAGTACCAGGTTATTAACCATAGGACATCCATATTTTGAATTGAAAAAGCCTAATGGCGA  
>HPV7\_Alpha\_9627389\_nt5914\_L1\_Tile|1  
CCAGGTTATTAACCATAGGACATCCATATTTTGAATTGAAAAAGCCTAATGGCGATGTAT  
>HPV7\_Alpha\_9627389\_nt5919\_L1\_Tile|1  
TTATTAACCATAGGACATCCATATTTTGAATTGAAAAAGCCTAATGGCGATGTATCGGTG  
>HPV7\_Alpha\_9627389\_nt5924\_L1\_Tile|1  
AACCATAGGACATCCATATTTTGAATTGAAAAAGCCTAATGGCGATGTATCGGTGCCTAA  
>HPV7\_Alpha\_9627389\_nt5929\_L1\_Tile|1  
TAGGACATCCATATTTTGAATTGAAAAAGCCTAATGGCGATGTATCGGTGCCTAAAGTGT  
>HPV7\_Alpha\_9627389\_nt5934\_L1\_Tile|1  
CATCCATATTTTGAATTGAAAAAGCCTAATGGCGATGTATCGGTGCCTAAAGTGTCTGGA  
>HPV7\_Alpha\_9627389\_nt5939\_L1\_Tile|1  
ATATTTTGAATTGAAAAAGCCTAATGGCGATGTATCGGTGCCTAAAGTGTCTGGACATCA

>HPV7\_Alpha\_9627389\_nt5944\_L1\_Tile|1  
TTGAATTGAAAAAGCCTAATGGCGATGTATCGGTGCCTAAAGTGTCTGGACATCAATACA  
>HPV7\_Alpha\_9627389\_nt6004\_L1\_Tile|1  
GAGTGTTTAGAGTACGCTTGCCCGACCTAATAAATTTGGATTATCAGACACGTCTTTAT  
>HPV7\_Alpha\_9627389\_nt6014\_L1\_Tile|1  
AGTACGCTTGCCCGACCTAATAAATTTGGATTATCAGACACGTCTTTATTTAATTCTGA  
>HPV7\_Alpha\_9627389\_nt6029\_L1\_Tile|1  
CCCTAATAAATTTGGATTATCAGACACGTCTTTATTTAATTCTGAAACCCAACGCCTTGT  
>HPV7\_Alpha\_9627389\_nt6584\_L1\_Tile|1  
AGGAACTACTGGAGACAGTGTTCCAAATGATTTATATATAACAGGTTTCATCTAATCGCGC  
>HPV7\_Alpha\_9627389\_nt6589\_L1\_Tile|1  
CTACTGGAGACAGTGTTCCAAATGATTTATATATAACAGGTTTCATCTAATCGCGCTTCTA  
>HPV7\_Alpha\_9627389\_nt6594\_L1\_Tile|1  
GGAGACAGTGTTCCAAATGATTTATATATAACAGGTTTCATCTAATCGCGCTTCTATTGCA  
>HPV7\_Alpha\_9627389\_nt6959\_L1\_Tile|1  
GACATATATACATGCTATGGATTCTTCCTTATTAGATGATTGGAATTTTAAAATTGGTCC  
>HPV7\_Alpha\_9627389\_nt6979\_L1\_Tile|1  
ATTCTTCCTTATTAGATGATTGGAATTTTAAAATTGGTCCTCCAGCGTCTGCAACCTTGG  
>HPV7\_Alpha\_9627389\_nt6984\_L1\_Tile|1  
TCCTTATTAGATGATTGGAATTTTAAAATTGGTCCTCCAGCGTCTGCAACCTTGGGAAGAT  
>HPV7\_Alpha\_9627389\_nt7034\_L1\_Tile|1  
CTTGAAGATACTTATAGTTTTCTTACCAATAAAGCCATAGCATGTCAGCGTGATGCACC  
>HPV7\_Alpha\_9627389\_nt7044\_L1\_Tile|1  
ACTTATAGGTTTCTTACCAATAAAGCCATAGCATGTCAGCGTGATGCACCCCCAAAAGAA  
>HPV8\_Beta\_333074\_nt6007\_L1\_Tile|1  
TGTTTTACAACAATAATGGTGACACATTACAGGTTCCCAAAGTATCGGGAAATCAACACAG  
>HPV8\_Beta\_333074\_nt6012\_L1\_Tile|1  
ACAACAATAATGGTGACACATTACAGGTTCCCAAAGTATCGGGAAATCAACACAGGGTCT  
>HPV8\_Beta\_333074\_nt6027\_L1\_Tile|1  
ACACATTACAGGTTCCCAAAGTATCGGGAAATCAACACAGGGTCTTTCGCTTAAAGTTAC  
>HPV8\_Beta\_333074\_nt6042\_L1\_Tile|2  
CCAAAGTATCGGGAAATCAACACAGGGTCTTTCGCTTAAAGTTACCAGATCCAAATAGGT  
>HPV8\_Beta\_333074\_nt6197\_L1\_Tile|1  
GTTGGGAGCACCGGCCATCCCTATTTTAATAAAGTGAAAGACACTGAAAACAGCAATTCA  
>HPV8\_Beta\_333074\_nt6202\_L1\_Tile|2  
GAGCACCGGCCATCCCTATTTTAATAAAGTGAAAGACACTGAAAACAGCAATTCATACAC  
>HPV8\_Beta\_333074\_nt6207\_L1\_Tile|1  
CCGGCCATCCCTATTTTAATAAAGTGAAAGACACTGAAAACAGCAATTCATACACCACAA  
>HPV8\_Beta\_333074\_nt6357\_L1\_Tile|1  
GGGAAAAAGCCATTCCATGTGCAGAGGACCAACAGCAAGGTCTGTGCCCACCCATTGAAC  
>HPV8\_Beta\_333074\_nt6362\_L1\_Tile|2  
AAAGCCATTCCATGTGCAGAGGACCAACAGCAAGGTCTGTGCCCACCCATTGAACTAAAA  
>HPV8\_Beta\_333074\_nt6367\_L1\_Tile|1  
CATTCCATGTGCAGAGGACCAACAGCAAGGTCTGTGCCCACCCATTGAACTAAAAAATAC  
>HPV8\_Beta\_333074\_nt6372\_L1\_Tile|1  
CATGTGCAGAGGACCAACAGCAAGGTCTGTGCCCACCCATTGAACTAAAAAATACAGTTA  
>HPV8\_Beta\_333074\_nt6377\_L1\_Tile|1  
GCAGAGGACCAACAGCAAGGTCTGTGCCCACCCATTGAACTAAAAAATACAGTTATTGAA  
>HPV8\_Beta\_333074\_nt6382\_L1\_Tile|2  
GGACCAACAGCAAGGTCTGTGCCCACCCATTGAACTAAAAAATACAGTTATTGAAGATGG  
>HPV8\_Beta\_333074\_nt6457\_L1\_Tile|1  
TGGTTTTGGTAATATGAACTTTAAGACTTTACAACAGAACAGATCTGATGTAAGTCTCGA  
>HPV8\_Beta\_333074\_nt6462\_L1\_Tile|2  
TTGGTAATATGAACTTTAAGACTTTACAACAGAACAGATCTGATGTAAGTCTCGACATAG  
>HPV8\_Beta\_333074\_nt6467\_L1\_Tile|1

AATATGAACTTTAAGACTTTACAACAGAACAGATCTGATGTAAGTCTCGACATAGTAAAT  
>HPV8\_Beta\_333074\_nt6472\_L1\_Tile|1  
GAACTTTAAGACTTTACAACAGAACAGATCTGATGTAAGTCTCGACATAGTAAATGAGAT  
>HPV8\_Beta\_333074\_nt6477\_L1\_Tile|1  
TTAAGACTTTACAACAGAACAGATCTGATGTAAGTCTCGACATAGTAAATGAGATATGCA  
>HPV8\_Beta\_333074\_nt6482\_L1\_Tile|2  
ACTTTACAACAGAACAGATCTGATGTAAGTCTCGACATAGTAAATGAGATATGCAAATAT  
>HPV8\_Beta\_333074\_nt6892\_L1\_Tile|1  
CACGCGAAACACCAATTTTAGTATTTTCAGTTTACACTGAAAATGGGGAACCTAAGAACAT  
>HPV8\_Beta\_333074\_nt6897\_L1\_Tile|1  
GAAACACCAATTTTAGTATTTTCAGTTTACACTGAAAATGGGGAACCTAAGAACATCACAG  
>HPV8\_Beta\_333074\_nt6902\_L1\_Tile|2  
ACCAATTTTAGTATTTTCAGTTTACACTGAAAATGGGGAACCTAAGAACATCACAGACTAT  
>HPV8\_Beta\_333074\_nt6907\_L1\_Tile|1  
TTTTAGTATTTTCAGTTTACACTGAAAATGGGGAACCTAAGAACATCACAGACTATAAATC  
>HPV8\_Beta\_333074\_nt6912\_L1\_Tile|1  
GTATTTTCAGTTTACACTGAAAATGGGGAACCTAAGAACATCACAGACTATAAATCAACCC  
>HPV8\_Beta\_333074\_nt6917\_L1\_Tile|1  
TCAGTTTACACTGAAAATGGGGAACCTAAGAACATCACAGACTATAAATCAACCCAGTTC  
>HPV8\_Beta\_333074\_nt6922\_L1\_Tile|2  
TTACACTGAAAATGGGGAACCTAAGAACATCACAGACTATAAATCAACCCAGTTCAGAGA  
>HPV8\_Beta\_333074\_nt6927\_L1\_Tile|1  
CTGAAAATGGGGAACCTAAGAACATCACAGACTATAAATCAACCCAGTTCAGAGAATATC  
>HPV8\_Beta\_333074\_nt6932\_L1\_Tile|1  
AATGGGGAACCTAAGAACATCACAGACTATAAATCAACCCAGTTCAGAGAATATCTGAGA  
>HPV8\_Beta\_333074\_nt6937\_L1\_Tile|1  
GGAACCTAAGAACATCACAGACTATAAATCAACCCAGTTCAGAGAATATCTGAGACATGT  
>HPV8\_Beta\_333074\_nt6942\_L1\_Tile|2  
TTAAGAACATCACAGACTATAAATCAACCCAGTTCAGAGAATATCTGAGACATGTAGAAG  
>HPV8\_Beta\_333074\_nt7002\_L1\_Tile|2  
AATATGAAATTTCCCTCATATTACAATTGTGTAAGATACCACTAAAGGCTGATGTTTTAG  
>HPV8\_Beta\_333074\_nt7012\_L1\_Tile|1  
TTCCCTCATATTACAATTGTGTAAGATACCACTAAAGGCTGATGTTTTAGCACAAATCAA  
>HPV8\_Beta\_333074\_nt7077\_L1\_Tile|1  
TGAATTCATCACTACTTGAGGAATGGCAACTGGGATTTGTACCTACCCCTGATACTCCAA  
>HPV8\_Beta\_333074\_nt7082\_L1\_Tile|2  
TCATCACTACTTGAGGAATGGCAACTGGGATTTGTACCTACCCCTGATACTCCAATTCAT  
>HPV8\_Beta\_333074\_nt7197\_L1\_Tile|1  
CTAAGGAAAAGCCTGATCCATATGCAAAGTTTAACTTCTGGAATGTGGACCTTACAGAAC  
>HPV8\_Beta\_333074\_nt7202\_L1\_Tile|2  
GAAAAGCCTGATCCATATGCAAAGTTTAACTTCTGGAATGTGGACCTTACAGAACGACTT  
>HPV8\_Beta\_333074\_nt7207\_L1\_Tile|1  
GCCTGATCCATATGCAAAGTTTAACTTCTGGAATGTGGACCTTACAGAACGACTTTCCCT  
>HPV8\_Beta\_333074\_nt7217\_L1\_Tile|1  
TATGCAAAGTTTAACTTCTGGAATGTGGACCTTACAGAACGACTTTCCCTGGATTTGGAT  
>HPV8\_Beta\_333074\_nt7222\_L1\_Tile|2  
AAAGTTTAACTTCTGGAATGTGGACCTTACAGAACGACTTTCCCTGGATTTGGATCAATA  
>HPV9\_Beta\_9627396\_nt5861\_L1\_Tile|1  
TTAGTGACCGTTTGCTAACAGTGGGTCATCCATATTATGATGTCCGCTCAGGCGACGGAC  
>HPV9\_Beta\_9627396\_nt5866\_L1\_Tile|1  
GACCGTTTGCTAACAGTGGGTCATCCATATTATGATGTCCGCTCAGGCGACGGACAAAGG  
>HPV9\_Beta\_9627396\_nt5871\_L1\_Tile|1  
TTTGCTAACAGTGGGTCATCCATATTATGATGTCCGCTCAGGCGACGGACAAAGGATTGA  
>HPV9\_Beta\_9627396\_nt5881\_L1\_Tile|1  
GTGGGTCATCCATATTATGATGTCCGCTCAGGCGACGGACAAAGGATTGAAGTCCCTAAA

>HPV9\_Beta\_9627396\_nt5901\_L1\_Tile|1  
TGTCCGCTCAGGCGACGGACAAAGGATTGAAGTCCCTAAAGTGTCTGGTAATCAGTATCG  
>HPV9\_Beta\_9627396\_nt6181\_L1\_Tile|1  
AACACATCTTTTGACCCCAAACAGGTACAAATGTTTCATTATAGGATGTATTCCATGCTTA  
>HPV9\_Beta\_9627396\_nt6236\_L1\_Tile|1  
GCTTAGGAGAACTGGGATAAAGCCAAAGTGTGTGAAAAGGATGCTAATAATCAACTAG  
>HPV9\_Beta\_9627396\_nt6241\_L1\_Tile|1  
GGAGAACTGGGATAAAGCCAAAGTGTGTGAAAAGGATGCTAATAATCAACTAGGCTTA  
>HPV9\_Beta\_9627396\_nt6246\_L1\_Tile|1  
ACACTGGGATAAAGCCAAAGTGTGTGAAAAGGATGCTAATAATCAACTAGGCTTATGTCC  
>HPV9\_Beta\_9627396\_nt6251\_L1\_Tile|1  
GGGATAAAGCCAAAGTGTGTGAAAAGGATGCTAATAATCAACTAGGCTTATGTCTCCTTA  
>HPV9\_Beta\_9627396\_nt6256\_L1\_Tile|1  
AAAGCCAAAGTGTGTGAAAAGGATGCTAATAATCAACTAGGCTTATGTCTCCTATAGAA  
>HPV9\_Beta\_9627396\_nt6261\_L1\_Tile|1  
CAAAGTGTGTGAAAAGGATGCTAATAATCAACTAGGCTTATGTCTCCTATAGAATTAAG  
>HPV9\_Beta\_9627396\_nt6266\_L1\_Tile|1  
TGTGTGAAAAGGATGCTAATAATCAACTAGGCTTATGTCTCCTATAGAATTAAGAAACA  
>HPV9\_Beta\_9627396\_nt6366\_L1\_Tile|1  
AAATATCAACAATAAGGAAGTGTCTTTAATAAGTCTGATGTAAGCTTAGATATTGTTGA  
>HPV9\_Beta\_9627396\_nt6371\_L1\_Tile|1  
TCAACAATAAGGAAGTGTCTTTAATAAGTCTGATGTAAGCTTAGATATTGTTGATGAAA  
>HPV9\_Beta\_9627396\_nt6521\_L1\_Tile|1  
GGCATTATTATGTTAGAGGAGGTTTCAGTTGGTGACGCTGTTCTGATGGTGCAGTAAACC  
>HPV9\_Beta\_9627396\_nt6526\_L1\_Tile|1  
TATTATGTTAGAGGAGGTTTCAGTTGGTGACGCTGTTCTGATGGTGCAGTAAACCAGGAT  
>HPV9\_Beta\_9627396\_nt6536\_L1\_Tile|1  
GAGGAGGTTTCAGTTGGTGACGCTGTTCTGATGGTGCAGTAAACCAGGATCATAATTTCT  
>HPV9\_Beta\_9627396\_nt6551\_L1\_Tile|1  
GTGACGCTGTTCTGATGGTGCAGTAAACCAGGATCATAATTTCTTTTGGCCAGCAAAAA  
>HPV9\_Beta\_9627396\_nt6556\_L1\_Tile|1  
GCTGTTCTGATGGTGCAGTAAACCAGGATCATAATTTCTTTTGGCCAGCAAAAAAGTGAT  
>HPV9\_Beta\_9627396\_nt6586\_L1\_Tile|1  
CATAATTTCTTTTGGCCAGCAAAAAAGTGATCAACAACAACGAACAATAGCTAATTCCACC  
>HPV9\_Beta\_9627396\_nt6596\_L1\_Tile|1  
TTTTGGCCAGCAAAAAAGTGATCAACAACAACGAACAATAGCTAATTCCACCTACTATCCTA  
>HPV9\_Beta\_9627396\_nt6601\_L1\_Tile|1  
CCAGCAAAAAAGTGATCAACAACAACGAACAATAGCTAATTCCACCTACTATCCTACAGTA  
>HPV9\_Beta\_9627396\_nt6606\_L1\_Tile|1  
AAAAAGTGATCAACAACAACGAACAATAGCTAATTCCACCTACTATCCTACAGTAAGTGG  
>HPV9\_Beta\_9627396\_nt6616\_L1\_Tile|1  
CAACAACAACGAACAATAGCTAATTCCACCTACTATCCTACAGTAAGTGGGTCATTAGTA  
>HPV9\_Beta\_9627396\_nt6621\_L1\_Tile|1  
ACAACGAACAATAGCTAATTCCACCTACTATCCTACAGTAAGTGGGTCATTAGTAAC TTC  
>HPV9\_Beta\_9627396\_nt6756\_L1\_Tile|1  
TCAGATATTTGTTACAGTGGCAGACAATACACGTAACACCAATTTTACCATTAGTGTGTC  
>HPV9\_Beta\_9627396\_nt6766\_L1\_Tile|1  
GTTACAGTGGCAGACAATACACGTAACACCAATTTTACCATTAGTGTGTCTACAGAGGCA  
>HPV9\_Beta\_9627396\_nt6776\_L1\_Tile|1  
CAGACAATACACGTAACACCAATTTTACCATTAGTGTGTCTACAGAGGCAGCTCAAACAG  
>HPV9\_Beta\_9627396\_nt6781\_L1\_Tile|1  
AATACACGTAACACCAATTTTACCATTAGTGTGTCTACAGAGGCAGCTCAAACAGAAGAA  
>HPV9\_Beta\_9627396\_nt6786\_L1\_Tile|1  
ACGTAACACCAATTTTACCATTAGTGTGTCTACAGAGGCAGCTCAAACAGAAGAAATATAA  
>HPV9\_Beta\_9627396\_nt6791\_L1\_Tile|1

ACACCAATTTTACCATTAGTGTGTCTACAGAGGCAGCTCAAACAGAAGAATATAATGCCA  
>HPV9\_Beta\_9627396\_nt6796\_L1\_Tile|1  
AATTTTACCATTAGTGTGTCTACAGAGGCAGCTCAAACAGAAGAATATAATGCCAATAAT  
>HPV9\_Beta\_9627396\_nt6801\_L1\_Tile|1  
TACCATTAGTGTGTCTACAGAGGCAGCTCAAACAGAAGAATATAATGCCAATAATATTAG  
>HPV9\_Beta\_9627396\_nt6806\_L1\_Tile|1  
TTAGTGTGTCTACAGAGGCAGCTCAAACAGAAGAATATAATGCCAATAATATTAGAGAAT  
>HPV9\_Beta\_9627396\_nt6886\_L1\_Tile|1  
TATCAGATTTTCATTAATCTTACAGTTGTGTAAAGTGCCTTTAGTAGCTGAAGTATTATCC  
>HPV9\_Beta\_9627396\_nt6891\_L1\_Tile|1  
GATTTTCATTAATCTTACAGTTGTGTAAAGTGCCTTTAGTAGCTGAAGTATTATCCCAGAT  
>HPV9\_Beta\_9627396\_nt7026\_L1\_Tile|1  
TATCTACAGATATATTGATTCAAAAGCCACAAAATGCCCAGATGCTGTTGAGCCTACAGA  
>HPV9\_Beta\_9627396\_nt7096\_L1\_Tile|1  
CCCTTTGCCAAATACTCATTTTGGAAAGTGGATCTAACTGAAAGATTATCGTTGGATCTT  
>HPV9\_Beta\_9627396\_nt7101\_L1\_Tile|1  
TGCCAAATACTCATTTTGGAAAGTGGATCTAACTGAAAGATTATCGTTGGATCTTGATCA  
>HPV9\_Beta\_9627396\_nt7136\_L1\_Tile|1  
AAAGATTATCGTTGGATCTTGATCAATATCCTTTAGGTAGAAAATTTCTTTTCAAGCTG  
>HPV9\_Beta\_9627396\_nt7166\_L1\_Tile|1  
CTTTAGGTAGAAAATTTCTTTTCAAGCTGGTTTGCAAACACGAAAACGTCCTATTAAAA  
>HPV9\_Beta\_9627396\_nt7171\_L1\_Tile|1  
GGTAGAAAATTTCTTTTCAAGCTGGTTTGCAAACACGAAAACGTCCTATTAAAAACATCT  
>HPV9\_Beta\_9627396\_nt7176\_L1\_Tile|1  
AAAATTTCTTTTCAAGCTGGTTTGCAAACACGAAAACGTCCTATTAAAAACATCTGTTAA  
>HPV9\_Beta\_9627396\_nt7181\_L1\_Tile|1  
TTCTTTTCAAGCTGGTTTGCAAACACGAAAACGTCCTATTAAAAACATCTGTTAAAAACAT  
>HPV9\_Beta\_9627396\_nt7186\_L1\_Tile|1  
TTTCAAGCTGGTTTGCAAACACGAAAACGTCCTATTAAAAACATCTGTTAAAAACATCTAAA  
>HPV9\_Beta\_9627396\_nt7191\_L1\_Tile|1  
AGCTGGTTTGCAAACACGAAAACGTCCTATTAAAAACATCTGTTAAAAACATCTAAAAATGC  
>HPV9\_Beta\_9627396\_nt7196\_L1\_Tile|1  
GTTTGCAAACACGAAAACGTCCTATTAAAAACATCTGTTAAAAACATCTAAAAATGCTAAGA  
>HPV9\_Beta\_9627396\_nt7201\_L1\_Tile|1  
CAAACACGAAAACGTCCTATTAAAAACATCTGTTAAAAACATCTAAAAATGCTAAGAGAAGG  
>HPV9\_Beta\_9627396\_nt7206\_L1\_Tile|1  
ACGAAAACGTCCTATTAAAAACATCTGTTAAAAACATCTAAAAATGCTAAGAGAAGGCGAAC  
>HPV9\_Beta\_9627396\_nt7210\_L1\_Tile|1  
AAACGTCCTATTAAAAACATCTGTTAAAAACATCTAAAAATGCTAAGAGAAGGCGAACCTAA  
>HPV10\_Alpha\_9627257\_nt6590\_L1\_Tile|1  
CAAGACATTTCTTTAATCGGGCTAGTGCTGTTGGAGACGCCATCCCAGACACTTTCATAT  
>HPV10\_Alpha\_9627257\_nt6595\_L1\_Tile|1  
CATTTCTTTAATCGGGCTAGTGCTGTTGGAGACGCCATCCCAGACACTTTCATATTAAAG  
>HPV10\_Alpha\_9627257\_nt6600\_L1\_Tile|1  
CTTTAATCGGGCTAGTGCTGTTGGAGACGCCATCCCAGACACTTTCATATTAAAGAGCAA  
>HPV10\_Alpha\_9627257\_nt6615\_L1\_Tile|1  
TGCTGTTGGAGACGCCATCCCAGACACTTTCATATTAAAGAGCAACGGTGGGGGGCGAGA  
>HPV10\_Alpha\_9627257\_nt6625\_L1\_Tile|1  
GACGCCATCCCAGACACTTTCATATTAAAGAGCAACGGTGGGGGGCGAGACGTTGGTAGT  
>HPV10\_Alpha\_9627257\_nt6815\_L1\_Tile|1  
CTGTGGTAGACACGACTCGCAGTACCAATATGTGCTTGTGTGTTCTTCTGAGGCCTCCC  
>HPV10\_Alpha\_9627257\_nt6820\_L1\_Tile|1  
GTAGACACGACTCGCAGTACCAATATGTGCTTGTGTGTTCTTCTGAGGCCTCCCCTGCC  
>HPV10\_Alpha\_9627257\_nt6825\_L1\_Tile|1  
CACGACTCGCAGTACCAATATGTGCTTGTGTGTTCTTCTGAGGCCTCCCCTGCCACTAC

>HPV10\_Alpha\_9627257\_nt6840\_L1\_Tile|1  
CAATATGTGCTTGTGTGTTTCCTTCTGAGGCCTCCCCTGCCACTACGTATGACGCCACCAA  
>HPV101\_Unclassified\_109390389\_nt4918\_L1\_Tile|1  
ATGTGTCTGAACCTCCTATTGTTGTGGATGGTTTTGATGCATTTGATACATTTTATTTGC  
>HPV101\_Unclassified\_109390389\_nt4923\_L1\_Tile|1  
TCTGAACCTCCTATTGTTGTGGATGGTTTTGATGCATTTGATACATTTTATTTGCATCCA  
>HPV101\_Unclassified\_109390389\_nt4928\_L1\_Tile|1  
ACCTCCTATTGTTGTGGATGGTTTTGATGCATTTGATACATTTTATTTGCATCCAAGTCA  
>HPV101\_Unclassified\_109390389\_nt4933\_L1\_Tile|1  
CTATTGTTGTGGATGGTTTTGATGCATTTGATACATTTTATTTGCATCCAAGTCACAGAC  
>HPV101\_Unclassified\_109390389\_nt4938\_L1\_Tile|1  
GTTGTGGATGGTTTTGATGCATTTGATACATTTTATTTGCATCCAAGTCACAGACGCAA  
>HPV101\_Unclassified\_109390389\_nt4963\_L1\_Tile|1  
ATACATTTTATTTGCATCCAAGTCACAGACGCAAACGCAAGCGCAAACGGTCTGGTTTTT  
>HPV101\_Unclassified\_109390389\_nt4968\_L1\_Tile|1  
TTTTTATTTGCATCCAAGTCACAGACGCAAACGCAAGCGCAAACGGTCTGGTTTTTAATGT  
>HPV101\_Unclassified\_109390389\_nt5008\_L1\_Tile|1  
AACGGTCTGGTTTTTAATGTTTTGCAGATGGCTGGTTTGTGGCTACCTCAGACTGGTAAA  
>HPV101\_Unclassified\_109390389\_nt5013\_L1\_Tile|1  
TCTGGTTTTTAATGTTTTGCAGATGGCTGGTTTGTGGCTACCTCAGACTGGTAAAATATA  
>HPV101\_Unclassified\_109390389\_nt5018\_L1\_Tile|1  
TTTTTAATGTTTTGCAGATGGCTGGTTTGTGGCTACCTCAGACTGGTAAAATATACCTAC  
>HPV101\_Unclassified\_109390389\_nt5043\_L1\_Tile|1  
TTTGTGGCTACCTCAGACTGGTAAAATATACCTACCTCCAGCTCCTCCTGTGTCTAGGAG  
>HPV101\_Unclassified\_109390389\_nt5048\_L1\_Tile|1  
GGCTACCTCAGACTGGTAAAATATACCTACCTCCAGCTCCTCCTGTGTCTAGGAGTCTTA  
>HPV101\_Unclassified\_109390389\_nt5053\_L1\_Tile|1  
CCTCAGACTGGTAAAATATACCTACCTCCAGCTCCTCCTGTGTCTAGGAGTCTTACCACC  
>HPV101\_Unclassified\_109390389\_nt5058\_L1\_Tile|1  
GACTGGTAAAATATACCTACCTCCAGCTCCTCCTGTGTCTAGGAGTCTTACCACCGATGA  
>HPV101\_Unclassified\_109390389\_nt5063\_L1\_Tile|1  
GTAAAATATACCTACCTCCAGCTCCTCCTGTGTCTAGGAGTCTTACCACCGATGAATATG  
>HPV101\_Unclassified\_109390389\_nt5083\_L1\_Tile|1  
GCTCCTCCTGTGTCTAGGAGTCTTACCACCGATGAATATGTTGTGGAAACATCTGTATTCT  
>HPV101\_Unclassified\_109390389\_nt5088\_L1\_Tile|1  
TCCTGTGTCTAGGAGTCTTACCACCGATGAATATGTTGTGGAAACATCTGTATTCTTCCA  
>HPV101\_Unclassified\_109390389\_nt5118\_L1\_Tile|1  
ATATGTTGTGGAAACATCTGTATTCTTCCATGCATCCAGTGATCGTCTAGTAACTGTGGG  
>HPV101\_Unclassified\_109390389\_nt5128\_L1\_Tile|1  
GAAACATCTGTATTCTTCCATGCATCCAGTGATCGTCTAGTAACTGTGGGTCACCCCTAT  
>HPV101\_Unclassified\_109390389\_nt5133\_L1\_Tile|1  
ATCTGTATTCTTCCATGCATCCAGTGATCGTCTAGTAACTGTGGGTCACCCCTATTTTCC  
>HPV101\_Unclassified\_109390389\_nt5138\_L1\_Tile|1  
TATTCTTCCATGCATCCAGTGATCGTCTAGTAACTGTGGGTCACCCCTATTTTCCCGTTA  
>HPV101\_Unclassified\_109390389\_nt5143\_L1\_Tile|1  
TTCCATGCATCCAGTGATCGTCTAGTAACTGTGGGTCACCCCTATTTTCCCGTTATAAAA  
>HPV101\_Unclassified\_109390389\_nt5148\_L1\_Tile|1  
TGCATCCAGTGATCGTCTAGTAACTGTGGGTCACCCCTATTTTCCCGTTATAAAACCAGG  
>HPV101\_Unclassified\_109390389\_nt5153\_L1\_Tile|1  
CCAGTGATCGTCTAGTAACTGTGGGTCACCCCTATTTTCCCGTTATAAAACCAGGCAATC  
>HPV101\_Unclassified\_109390389\_nt5158\_L1\_Tile|1  
GATCGTCTAGTAACTGTGGGTCACCCCTATTTTCCCGTTATAAAACCAGGCAATCACACC  
>HPV101\_Unclassified\_109390389\_nt5163\_L1\_Tile|1  
TCTAGTAACTGTGGGTCACCCCTATTTTCCCGTTATAAAACCAGGCAATCACACCGTTGA  
>HPV101\_Unclassified\_109390389\_nt5168\_L1\_Tile|1

TAAGTGTGGGTCACCCCTATTTTCCCGTTATAAAACCAGGCAATCACACCGTTGAGGTTTC  
>HPV101\_Unclassified\_109390389\_nt5178\_L1\_Tile|1  
TCACCCCTATTTTCCCGTTATAAAACCAGGCAATCACACCGTTGAGGTTCTTAAGGTTTC  
>HPV101\_Unclassified\_109390389\_nt5183\_L1\_Tile|1  
CCTATTTTCCCGTTATAAAACCAGGCAATCACACCGTTGAGGTTCTTAAGGTTTCTGGCA  
>HPV101\_Unclassified\_109390389\_nt5188\_L1\_Tile|1  
TTTCCCGTTATAAAACCAGGCAATCACACCGTTGAGGTTCTTAAGGTTTCTGGCAACCAG  
>HPV101\_Unclassified\_109390389\_nt5193\_L1\_Tile|1  
CGTTATAAAACCAGGCAATCACACCGTTGAGGTTCTTAAGGTTTCTGGCAACCAGTTTAG  
>HPV101\_Unclassified\_109390389\_nt5198\_L1\_Tile|1  
TAAACCAGGCAATCACACCGTTGAGGTTCTTAAGGTTTCTGGCAACCAGTTTAGGGCTT  
>HPV101\_Unclassified\_109390389\_nt5208\_L1\_Tile|1  
CAATCACACCGTTGAGGTTCTTAAGGTTTCTGGCAACCAGTTTAGGGCTTTTCGCCTACG  
>HPV101\_Unclassified\_109390389\_nt5223\_L1\_Tile|1  
GGTTCTTAAGGTTTCTGGCAACCAGTTTAGGGCTTTTCGCCTACGTCTCCAGATCCCAA  
>HPV101\_Unclassified\_109390389\_nt5233\_L1\_Tile|1  
GTTTCTGGCAACCAGTTTAGGGCTTTTCGCCTACGTCTCCAGATCCCAATAAGTTTGCT  
>HPV101\_Unclassified\_109390389\_nt5238\_L1\_Tile|1  
TGGCAACCAGTTTAGGGCTTTTCGCCTACGTCTCCAGATCCCAATAAGTTTGCTTTAAT  
>HPV101\_Unclassified\_109390389\_nt5298\_L1\_Tile|1  
TGACAAACAATTGTATAATGTTGAATCGGAGCGCCTCGTGTGGCGTCTTAGAGGAATTGA  
>HPV101\_Unclassified\_109390389\_nt5303\_L1\_Tile|1  
AACAATTGTATAATGTTGAATCGGAGCGCCTCGTGTGGCGTCTTAGAGGAATTGATATTG  
>HPV101\_Unclassified\_109390389\_nt5308\_L1\_Tile|1  
TTGTATAATGTTGAATCGGAGCGCCTCGTGTGGCGTCTTAGAGGAATTGATATTGGCAGA  
>HPV101\_Unclassified\_109390389\_nt5313\_L1\_Tile|1  
TAATGTTGAATCGGAGCGCCTCGTGTGGCGTCTTAGAGGAATTGATATTGGCAGAGGAGG  
>HPV101\_Unclassified\_109390389\_nt5403\_L1\_Tile|1  
TTTATTTAATAAGTTAAAGGATACTGAAAATCCTAATGGATATCAAAAGGGTGGTGCTAA  
>HPV101\_Unclassified\_109390389\_nt5408\_L1\_Tile|1  
TTAATAAGTTAAAGGATACTGAAAATCCTAATGGATATCAAAAGGGTGGTGCTAAGGACG  
>HPV101\_Unclassified\_109390389\_nt5413\_L1\_Tile|1  
AAGTTAAAGGATACTGAAAATCCTAATGGATATCAAAAGGGTGGTGCTAAGGACGCTAGA  
>HPV101\_Unclassified\_109390389\_nt5423\_L1\_Tile|1  
ATACTGAAAATCCTAATGGATATCAAAAGGGTGGTGCTAAGGACGCTAGACAAAATGTTT  
>HPV101\_Unclassified\_109390389\_nt5428\_L1\_Tile|1  
GAAAATCCTAATGGATATCAAAAGGGTGGTGCTAAGGACGCTAGACAAAATGTTTCTATG  
>HPV101\_Unclassified\_109390389\_nt5433\_L1\_Tile|1  
TCCTAATGGATATCAAAAGGGTGGTGCTAAGGACGCTAGACAAAATGTTTCTATGGATCC  
>HPV101\_Unclassified\_109390389\_nt5438\_L1\_Tile|1  
ATGGATATCAAAAGGGTGGTGCTAAGGACGCTAGACAAAATGTTTCTATGGATCCTAAAC  
>HPV101\_Unclassified\_109390389\_nt5543\_L1\_Tile|1  
ACTGGGATGTTGCTCCTGCATGTGACAAAAATCCTCCTAAAGGCACCTGTCCCTCCTTTAC  
>HPV101\_Unclassified\_109390389\_nt5548\_L1\_Tile|1  
GATGTTGCTCCTGCATGTGACAAAAATCCTCCTAAAGGCACCTGTCCCTCCTTTACAGTTG  
>HPV101\_Unclassified\_109390389\_nt5558\_L1\_Tile|1  
CTGCATGTGACAAAAATCCTCCTAAAGGCACCTGTCCCTCCTTTACAGTTGGTGCTCCTCTG  
>HPV101\_Unclassified\_109390389\_nt5563\_L1\_Tile|1  
TGTGACAAAAATCCTCCTAAAGGCACCTGTCCCTCCTTTACAGTTGGTGCTCCTCTGTTATT  
>HPV101\_Unclassified\_109390389\_nt5568\_L1\_Tile|1  
CAAAAATCCTCCTAAAGGCACCTGTCCCTCCTTTACAGTTGGTGCTCCTCTGTTATTCAGGA  
>HPV101\_Unclassified\_109390389\_nt5658\_L1\_Tile|1  
CATGAATTTTGCTGCCTTGCAGGCTGATCACTCAGGGGTACCCCTAGATATTGTTGCAGAG  
>HPV101\_Unclassified\_109390389\_nt5663\_L1\_Tile|1  
ATTTTGCTGCCTTGCAGGCTGATCACTCAGGGGTACCCCTAGATATTGTTGCAGATACTT



>HPV101\_Unclassified\_109390389\_nt5668\_L1\_Tile|1  
GCTGCCTTGCAGGCTGATCACTCAGGGGTACCCCTAGATATTGTTGCAGATACTTGTAA  
>HPV101\_Unclassified\_109390389\_nt5678\_L1\_Tile|1  
AGGCTGATCACTCAGGGGTACCCCTAGATATTGTTGCAGATACTTGTAAATGGCCAGACT  
>HPV101\_Unclassified\_109390389\_nt5683\_L1\_Tile|1  
GATCACTCAGGGGTACCCCTAGATATTGTTGCAGATACTTGTAAATGGCCAGACTTTCTT  
>HPV101\_Unclassified\_109390389\_nt5688\_L1\_Tile|1  
CTCAGGGGTACCCCTAGATATTGTTGCAGATACTTGTAAATGGCCAGACTTTCTTGGTAT  
>HPV101\_Unclassified\_109390389\_nt5698\_L1\_Tile|1  
CCCCTAGATATTGTTGCAGATACTTGTAAATGGCCAGACTTTCTTGGTATGGCCAATGAT  
>HPV101\_Unclassified\_109390389\_nt5723\_L1\_Tile|1  
GTAAATGGCCAGACTTTCTTGGTATGGCCAATGATAGGTTTGGGGATGGTATGTTTTTCT  
>HPV101\_Unclassified\_109390389\_nt5743\_L1\_Tile|1  
GGTATGGCCAATGATAGGTTTGGGGATGGTATGTTTTTCTTTGGCCGCCGCGAGCAGGTG  
>HPV101\_Unclassified\_109390389\_nt5748\_L1\_Tile|1  
GGCCAATGATAGGTTTGGGGATGGTATGTTTTCTTTGGCCGCCGCGAGCAGGTGTATGC  
>HPV101\_Unclassified\_109390389\_nt5758\_L1\_Tile|1  
AGGTTTGGGGATGGTATGTTTTCTTTGGCCGCCGCGAGCAGGTGTATGCACGTCATTAT  
>HPV101\_Unclassified\_109390389\_nt5763\_L1\_Tile|1  
TGGGGATGGTATGTTTTCTTTGGCCGCCGCGAGCAGGTGTATGCACGTCATTATTTTAC  
>HPV101\_Unclassified\_109390389\_nt5768\_L1\_Tile|1  
ATGGTATGTTTTCTTTGGCCGCCGCGAGCAGGTGTATGCACGTCATTATTTTACCCATA  
>HPV101\_Unclassified\_109390389\_nt5773\_L1\_Tile|1  
ATGTTTTTCTTTGGCCGCCGCGAGCAGGTGTATGCACGTCATTATTTTACCCATAATGGC  
>HPV101\_Unclassified\_109390389\_nt5778\_L1\_Tile|1  
TTTCTTTGGCCGCCGCGAGCAGGTGTATGCACGTCATTATTTTACCCATAATGGCACTGT  
>HPV101\_Unclassified\_109390389\_nt5793\_L1\_Tile|1  
CGAGCAGGTGTATGCACGTCATTATTTTACCCATAATGGCACTGTTGGTGACAGTGTTC  
>HPV101\_Unclassified\_109390389\_nt5798\_L1\_Tile|1  
AGGTGTATGCACGTCATTATTTTACCCATAATGGCACTGTTGGTGACAGTGTTCAGAGG  
>HPV101\_Unclassified\_109390389\_nt5808\_L1\_Tile|1  
ACGTCATTATTTTACCCATAATGGCACTGTTGGTGACAGTGTTCAGAGGAGGGGTTTGA  
>HPV101\_Unclassified\_109390389\_nt5818\_L1\_Tile|1  
TTCACCCATAATGGCACTGTTGGTGACAGTGTTCAGAGGAGGGGTTTGAAGGTAATGGT  
>HPV101\_Unclassified\_109390389\_nt5828\_L1\_Tile|1  
ATGGCACTGTTGGTGACAGTGTTCAGAGGAGGGGTTTGAAGGTAATGGTAAAAAGTATT  
>HPV101\_Unclassified\_109390389\_nt5833\_L1\_Tile|1  
ACTGTTGGTGACAGTGTTCAGAGGAGGGGTTTGAAGGTAATGGTAAAAAGTATTTTATT  
>HPV101\_Unclassified\_109390389\_nt5848\_L1\_Tile|1  
GTTCCAGAGGAGGGGTTTGAAGGTAATGGTAAAAAGTATTTTATTGGTGCTGAGCAAGGC  
>HPV101\_Unclassified\_109390389\_nt5863\_L1\_Tile|1  
TTTGAGGGTAATGGTAAAAAGTATTTTATTGGTGCTGAGCAAGGCCAGGACCAGCATCAG  
>HPV101\_Unclassified\_109390389\_nt5868\_L1\_Tile|1  
GGGTAATGGTAAAAAGTATTTTATTGGTGCTGAGCAAGGCCAGGACCAGCATCAGCTGGC  
>HPV101\_Unclassified\_109390389\_nt5878\_L1\_Tile|1  
AAAAAGTATTTTATTGGTGCTGAGCAAGGCCAGGACCAGCATCAGCTGGCTCCCTCTTTA  
>HPV101\_Unclassified\_109390389\_nt5883\_L1\_Tile|1  
GTATTTTATTGGTGCTGAGCAAGGCCAGGACCAGCATCAGCTGGCTCCCTCTTTATATTT  
>HPV101\_Unclassified\_109390389\_nt5888\_L1\_Tile|1  
TTATTGGTGCTGAGCAAGGCCAGGACCAGCATCAGCTGGCTCCCTCTTTATATTTTGCTA  
>HPV101\_Unclassified\_109390389\_nt5893\_L1\_Tile|1  
GGTGCTGAGCAAGGCCAGGACCAGCATCAGCTGGCTCCCTCTTTATATTTTGCTACACCT  
>HPV101\_Unclassified\_109390389\_nt5913\_L1\_Tile|1  
CCAGCATCAGCTGGCTCCCTCTTTATATTTTGCTACACCTAGTGGGTCCCTTAGCATCTAG  
>HPV101\_Unclassified\_109390389\_nt5918\_L1\_Tile|1

ATCAGCTGGCTCCCTCTTTATATTTTGCTACACCTAGTGGGTCCTTAGCATCTAGTGACT  
>HPV101\_Unclassified\_109390389\_nt5928\_L1\_Tile|1  
TCCCTCTTTATATTTTGCTACACCTAGTGGGTCCTTAGCATCTAGTGACTCCCAGTTATT  
>HPV101\_Unclassified\_109390389\_nt5933\_L1\_Tile|1  
CTTTATATTTTGCTACACCTAGTGGGTCCTTAGCATCTAGTGACTCCCAGTTATTTAGTA  
>HPV101\_Unclassified\_109390389\_nt5958\_L1\_Tile|1  
GTCCTTAGCATCTAGTGACTCCCAGTTATTTAGTAGGCCCTACTGGATTGAACGGGCTCA  
>HPV101\_Unclassified\_109390389\_nt5978\_L1\_Tile|1  
CCCAGTTATTTAGTAGGCCCTACTGGATTGAACGGGCTCAGGGTGCTAATAATGCTGTAT  
>HPV101\_Unclassified\_109390389\_nt5983\_L1\_Tile|1  
TTATTTAGTAGGCCCTACTGGATTGAACGGGCTCAGGGTGCTAATAATGCTGTATTATGG  
>HPV101\_Unclassified\_109390389\_nt5988\_L1\_Tile|1  
TAGTAGGCCCTACTGGATTGAACGGGCTCAGGGTGCTAATAATGCTGTATTATGGAATAA  
>HPV101\_Unclassified\_109390389\_nt5993\_L1\_Tile|1  
GGCCCTACTGGATTGAACGGGCTCAGGGTGCTAATAATGCTGTATTATGGAATAATAATG  
>HPV101\_Unclassified\_109390389\_nt5998\_L1\_Tile|1  
TACTGGATTGAACGGGCTCAGGGTGCTAATAATGCTGTATTATGGAATAATAATGTATTT  
>HPV101\_Unclassified\_109390389\_nt6003\_L1\_Tile|1  
GATTGAACGGGCTCAGGGTGCTAATAATGCTGTATTATGGAATAATAATGTATTTGTTAC  
>HPV101\_Unclassified\_109390389\_nt6008\_L1\_Tile|1  
AACGGGCTCAGGGTGCTAATAATGCTGTATTATGGAATAATAATGTATTTGTTACTTTGG  
>HPV101\_Unclassified\_109390389\_nt6018\_L1\_Tile|1  
GGGTGCTAATAATGCTGTATTATGGAATAATAATGTATTTGTTACTTTGGTTGATAATAC  
>HPV101\_Unclassified\_109390389\_nt6023\_L1\_Tile|1  
CTAATAATGCTGTATTATGGAATAATAATGTATTTGTTACTTTGGTTGATAATACCCACA  
>HPV101\_Unclassified\_109390389\_nt6033\_L1\_Tile|1  
TGTATTATGGAATAATAATGTATTTGTTACTTTGGTTGATAATACCCACAATGTGAATTT  
>HPV101\_Unclassified\_109390389\_nt6038\_L1\_Tile|1  
TATGGAATAATAATGTATTTGTTACTTTGGTTGATAATACCCACAATGTGAATTTTACTA  
>HPV101\_Unclassified\_109390389\_nt6043\_L1\_Tile|1  
AATAATAATGTATTTGTTACTTTGGTTGATAATACCCACAATGTGAATTTTACTATTAAT  
>HPV101\_Unclassified\_109390389\_nt6048\_L1\_Tile|1  
TAATGTATTTGTTACTTTGGTTGATAATACCCACAATGTGAATTTTACTATTAATGTTGC  
>HPV101\_Unclassified\_109390389\_nt6053\_L1\_Tile|1  
TATTTGTTACTTTGGTTGATAATACCCACAATGTGAATTTTACTATTAATGTTGCTACAG  
>HPV101\_Unclassified\_109390389\_nt6058\_L1\_Tile|1  
GTTACTTTGGTTGATAATACCCACAATGTGAATTTTACTATTAATGTTGCTACAGAAGAT  
>HPV101\_Unclassified\_109390389\_nt6063\_L1\_Tile|1  
TTTGGTTGATAATACCCACAATGTGAATTTTACTATTAATGTTGCTACAGAAGATAATAT  
>HPV101\_Unclassified\_109390389\_nt6068\_L1\_Tile|1  
TTGATAATACCCACAATGTGAATTTTACTATTAATGTTGCTACAGAAGATAATATTCAGT  
>HPV101\_Unclassified\_109390389\_nt6073\_L1\_Tile|1  
AATACCCACAATGTGAATTTTACTATTAATGTTGCTACAGAAGATAATATTCAGTCCTAT  
>HPV101\_Unclassified\_109390389\_nt6078\_L1\_Tile|1  
CCACAATGTGAATTTTACTATTAATGTTGCTACAGAAGATAATATTCAGTCCTATGATTC  
>HPV101\_Unclassified\_109390389\_nt6088\_L1\_Tile|1  
AATTTTACTATTAATGTTGCTACAGAAGATAATATTCAGTCCTATGATTCTGCAAAGTAC  
>HPV101\_Unclassified\_109390389\_nt6093\_L1\_Tile|1  
TACTATTAATGTTGCTACAGAAGATAATATTCAGTCCTATGATTCTGCAAAGTACAAGCA  
>HPV101\_Unclassified\_109390389\_nt6098\_L1\_Tile|1  
TTAATGTTGCTACAGAAGATAATATTCAGTCCTATGATTCTGCAAAGTACAAGCACTACC  
>HPV101\_Unclassified\_109390389\_nt6103\_L1\_Tile|1  
GTTGCTACAGAAGATAATATTCAGTCCTATGATTCTGCAAAGTACAAGCACTACCTCAGA  
>HPV101\_Unclassified\_109390389\_nt6108\_L1\_Tile|1  
TACAGAAGATAATATTCAGTCCTATGATTCTGCAAAGTACAAGCACTACCTCAGACATGT

>HPV101\_Unclassified\_109390389\_nt6113\_L1\_Tile|1  
AAGATAATATTCAGTCCTATGATTCTGCAAAGTACAAGCACTACCTCAGACATGTGGAGG  
>HPV101\_Unclassified\_109390389\_nt6118\_L1\_Tile|1  
AATATTCAGTCCTATGATTCTGCAAAGTACAAGCACTACCTCAGACATGTGGAGGAATTT  
>HPV101\_Unclassified\_109390389\_nt6123\_L1\_Tile|1  
TCAGTCCTATGATTCTGCAAAGTACAAGCACTACCTCAGACATGTGGAGGAATTTGAAAT  
>HPV101\_Unclassified\_109390389\_nt6128\_L1\_Tile|1  
CCTATGATTCTGCAAAGTACAAGCACTACCTCAGACATGTGGAGGAATTTGAAATTTCTC  
>HPV101\_Unclassified\_109390389\_nt6133\_L1\_Tile|1  
GATTCTGCAAAGTACAAGCACTACCTCAGACATGTGGAGGAATTTGAAATTTCTCTCATT  
>HPV101\_Unclassified\_109390389\_nt6138\_L1\_Tile|1  
TGCAAAGTACAAGCACTACCTCAGACATGTGGAGGAATTTGAAATTTCTCTCATTGTGCA  
>HPV101\_Unclassified\_109390389\_nt6143\_L1\_Tile|1  
AGTACAAGCACTACCTCAGACATGTGGAGGAATTTGAAATTTCTCTCATTGTGCAGCTCT  
>HPV101\_Unclassified\_109390389\_nt6158\_L1\_Tile|1  
TCAGACATGTGGAGGAATTTGAAATTTCTCTCATTGTGCAGCTCTGTAAAGTGTCTCTTA  
>HPV101\_Unclassified\_109390389\_nt6163\_L1\_Tile|1  
CATGTGGAGGAATTTGAAATTTCTCTCATTGTGCAGCTCTGTAAAGTGTCTCTTACTCCC  
>HPV101\_Unclassified\_109390389\_nt6173\_L1\_Tile|1  
AATTTGAAATTTCTCTCATTGTGCAGCTCTGTAAAGTGTCTCTTACTCCCGATGTATTGG  
>HPV101\_Unclassified\_109390389\_nt6178\_L1\_Tile|1  
GAAATTTCTCTCATTGTGCAGCTCTGTAAAGTGTCTCTTACTCCCGATGTATTGGCACAC  
>HPV101\_Unclassified\_109390389\_nt6183\_L1\_Tile|1  
TTCTCTCATTGTGCAGCTCTGTAAAGTGTCTCTTACTCCCGATGTATTGGCACACATACA  
>HPV101\_Unclassified\_109390389\_nt6193\_L1\_Tile|1  
GTGCAGCTCTGTAAAGTGTCTCTTACTCCCGATGTATTGGCACACATACACTTAATGAAT  
>HPV101\_Unclassified\_109390389\_nt6198\_L1\_Tile|1  
GCTCTGTAAAGTGTCTCTTACTCCCGATGTATTGGCACACATACACTTAATGAATCCCTC  
>HPV101\_Unclassified\_109390389\_nt6203\_L1\_Tile|1  
GTAAAGTGTCTCTTACTCCCGATGTATTGGCACACATACACTTAATGAATCCCTCTATTTC  
>HPV101\_Unclassified\_109390389\_nt6208\_L1\_Tile|1  
GTGTCTCTTACTCCCGATGTATTGGCACACATACACTTAATGAATCCCTCTATTCTGGAT  
>HPV101\_Unclassified\_109390389\_nt6213\_L1\_Tile|1  
TCTTACTCCCGATGTATTGGCACACATACACTTAATGAATCCCTCTATTCTGGATGAATG  
>HPV101\_Unclassified\_109390389\_nt6218\_L1\_Tile|1  
CTCCCGATGTATTGGCACACATACACTTAATGAATCCCTCTATTCTGGATGAATGGCAAT  
>HPV101\_Unclassified\_109390389\_nt6223\_L1\_Tile|1  
GATGTATTGGCACACATACACTTAATGAATCCCTCTATTCTGGATGAATGGCAATTAGGT  
>HPV101\_Unclassified\_109390389\_nt6238\_L1\_Tile|1  
ATACACTTAATGAATCCCTCTATTCTGGATGAATGGCAATTAGGTATTGCGGCTCCACCG  
>HPV101\_Unclassified\_109390389\_nt6243\_L1\_Tile|1  
CTTAATGAATCCCTCTATTCTGGATGAATGGCAATTAGGTATTGCGGCTCCACCGTCTAC  
>HPV101\_Unclassified\_109390389\_nt6248\_L1\_Tile|1  
TGAATCCCTCTATTCTGGATGAATGGCAATTAGGTATTGCGGCTCCACCGTCTACCTCTA  
>HPV101\_Unclassified\_109390389\_nt6253\_L1\_Tile|1  
CCCTCTATTCTGGATGAATGGCAATTAGGTATTGCGGCTCCACCGTCTACCTCTATTGAA  
>HPV101\_Unclassified\_109390389\_nt6263\_L1\_Tile|1  
TGGATGAATGGCAATTAGGTATTGCGGCTCCACCGTCTACCTCTATTGAAACCACTTACA  
>HPV101\_Unclassified\_109390389\_nt6268\_L1\_Tile|1  
GAATGGCAATTAGGTATTGCGGCTCCACCGTCTACCTCTATTGAAACCACTTACAGATAT  
>HPV101\_Unclassified\_109390389\_nt6273\_L1\_Tile|1  
GCAATTAGGTATTGCGGCTCCACCGTCTACCTCTATTGAAACCACTTACAGATATATTGA  
>HPV101\_Unclassified\_109390389\_nt6278\_L1\_Tile|1  
TAGGTATTGCGGCTCCACCGTCTACCTCTATTGAAACCACTTACAGATATATTGATTCTC  
>HPV101\_Unclassified\_109390389\_nt6283\_L1\_Tile|1

ATTGCGGCTCCACCGTCTACCTCTATTGAAACCACTTACAGATATATTGATTCTCTTGCT  
>HPV101\_Unclassified\_109390389\_nt6303\_L1\_Tile|1  
CTCTATTGAAACCACTTACAGATATATTGATTCTCTTGCTACAATGTGTCCCACAGCAGA  
>HPV101\_Unclassified\_109390389\_nt6343\_L1\_Tile|1  
ACAATGTGTCCCACAGCAGAGCCTCCTAAGGAAAAGGAAGATCCATATGACAAAATGTCT  
>HPV101\_Unclassified\_109390389\_nt6383\_L1\_Tile|1  
ATCCATATGACAAAATGTCTTTTTTGGGTGGTTGATTTATCAGACAGAATGTCCTCTGAAT  
>HPV101\_Unclassified\_109390389\_nt6388\_L1\_Tile|1  
TATGACAAAATGTCTTTTTTGGGTGGTTGATTTATCAGACAGAATGTCCTCTGAATTAGGG  
>HPV101\_Unclassified\_109390389\_nt6393\_L1\_Tile|1  
CAAAATGTCTTTTTTGGGTGGTTGATTTATCAGACAGAATGTCCTCTGAATTAGGGGCCTA  
>HPV101\_Unclassified\_109390389\_nt6398\_L1\_Tile|1  
TGTCTTTTTTGGGTGGTTGATTTATCAGACAGAATGTCCTCTGAATTAGGGGCCTATCCTC  
>HPV101\_Unclassified\_109390389\_nt6403\_L1\_Tile|1  
TTTTTGGGTGGTTGATTTATCAGACAGAATGTCCTCTGAATTAGGGGCCTATCCTCTTGGT  
>HPV101\_Unclassified\_109390389\_nt6413\_L1\_Tile|1  
TTGATTTATCAGACAGAATGTCCTCTGAATTAGGGGCCTATCCTCTTGGTAGGCGCTTTT  
>HPV101\_Unclassified\_109390389\_nt6418\_L1\_Tile|1  
TTATCAGACAGAATGTCCTCTGAATTAGGGGCCTATCCTCTTGGTAGGCGCTTTTTACAT  
>HPV101\_Unclassified\_109390389\_nt6423\_L1\_Tile|1  
AGACAGAATGTCCTCTGAATTAGGGGCCTATCCTCTTGGTAGGCGCTTTTTACATCAAAC  
>HPV101\_Unclassified\_109390389\_nt6433\_L1\_Tile|1  
TCCTCTGAATTAGGGGCCTATCCTCTTGGTAGGCGCTTTTTACATCAAACAGGGTCTGCC  
>HPV101\_Unclassified\_109390389\_nt6453\_L1\_Tile|1  
TCCTCTTGGTAGGCGCTTTTTACATCAAACAGGGTCTGCCCGCCTGCGCGCCCCCTAAA  
>HPV101\_Unclassified\_109390389\_nt6458\_L1\_Tile|1  
TTGGTAGGCGCTTTTTACATCAAACAGGGTCTGCCCGCCTGCGCGCCCCCTAAAGCGAC  
>HPV101\_Unclassified\_109390389\_nt6468\_L1\_Tile|1  
CTTTTTACATCAAACAGGGTCTGCCCGCCTGCGCGCCCCCTAAAGCGACCCCGTCCTTC  
>HPV101\_Unclassified\_109390389\_nt6473\_L1\_Tile|1  
TACATCAAACAGGGTCTGCCCGCCTGCGCGCCCCCTAAAGCGACCCCGTCCTTCTACGC  
>HPV101\_Unclassified\_109390389\_nt6518\_L1\_Tile|1  
CCCGTCCTTCTACGCCTACCAGGCCTACCTCCAGGTCTTCCAAACGCCGACGCAGGCAAG  
>HPV101\_Unclassified\_109390389\_nt6523\_L1\_Tile|1  
CCTTCTACGCCTACCAGGCCTACCTCCAGGTCTTCCAAACGCCGACGCAGGCAAGTTTAA  
>HPV102\_Alpha\_71726718\_nt5359\_L1\_Tile|1  
ATTAGTCCTATTGCAGGTGCAGAGCATATTGAACTTCGCCCCCTTGACGCTTCCATTGCT  
>HPV102\_Alpha\_71726718\_nt5364\_L1\_Tile|1  
TCCTATTGCAGGTGCAGAGCATATTGAACTTCGCCCCCTTGACGCTTCCATTGCTACTGC  
>HPV102\_Alpha\_71726718\_nt5379\_L1\_Tile|1  
AGAGCATATTGAACTTCGCCCCCTTGACGCTTCCATTGCTACTGCCCCAGGGGACTCCTT  
>HPV102\_Alpha\_71726718\_nt5384\_L1\_Tile|1  
ATATTGAACTTCGCCCCCTTGACGCTTCCATTGCTACTGCCCCAGGGGACTCCTTATATG  
>HPV102\_Alpha\_71726718\_nt5389\_L1\_Tile|1  
GAACTTCGCCCCCTTGACGCTTCCATTGCTACTGCCCCAGGGGACTCCTTATATGATATT  
>HPV102\_Alpha\_71726718\_nt5394\_L1\_Tile|1  
TCGCCCCCTTGACGCTTCCATTGCTACTGCCCCAGGGGACTCCTTATATGATATTTATGC  
>HPV102\_Alpha\_71726718\_nt5399\_L1\_Tile|1  
CCTTGACGCTTCCATTGCTACTGCCCCAGGGGACTCCTTATATGATATTTATGCTGATA  
>HPV102\_Alpha\_71726718\_nt5404\_L1\_Tile|1  
CAGCCTTCCATTGCTACTGCCCCAGGGGACTCCTTATATGATATTTATGCTGATAATGGC  
>HPV102\_Alpha\_71726718\_nt5409\_L1\_Tile|1  
TTCCATTGCTACTGCCCCAGGGGACTCCTTATATGATATTTATGCTGATAATGGCCACTT  
>HPV102\_Alpha\_71726718\_nt5414\_L1\_Tile|1  
TTGCTACTGCCCCAGGGGACTCCTTATATGATATTTATGCTGATAATGGCCACTTGGACT

>HPV102\_Alpha\_71726718\_nt5419\_L1\_Tile|1  
ACTGCCCCAGGGGACTCCTTATATGATATTTATGCTGATAATGGCCACTTGGACTCCTTG  
>HPV102\_Alpha\_71726718\_nt5429\_L1\_Tile|1  
GGGACTCCTTATATGATATTTATGCTGATAATGGCCACTTGGACTCCTTGGCGTCTCCAC  
>HPV102\_Alpha\_71726718\_nt5434\_L1\_Tile|1  
TCCTTATATGATATTTATGCTGATAATGGCCACTTGGACTCCTTGGCGTCTCCACATGTT  
>HPV102\_Alpha\_71726718\_nt5444\_L1\_Tile|1  
ATATTTATGCTGATAATGGCCACTTGGACTCCTTGGCGTCTCCACATGTTTCATATACTT  
>HPV102\_Alpha\_71726718\_nt5449\_L1\_Tile|1  
TATGCTGATAATGGCCACTTGGACTCCTTGGCGTCTCCACATGTTTCATATACTTCTTCC  
>HPV102\_Alpha\_71726718\_nt5454\_L1\_Tile|1  
TGATAATGGCCACTTGGACTCCTTGGCGTCTCCACATGTTTCATATACTTCTTCCACGTC  
>HPV102\_Alpha\_71726718\_nt5474\_L1\_Tile|1  
CCTTGGCGTCTCCACATGTTTCATATACTTCTTCCACGTCTGTTCCCTTGAATCTACAA  
>HPV102\_Alpha\_71726718\_nt5484\_L1\_Tile|1  
TCCACATGTTTCATATACTTCTTCCACGTCTGTTCCCTTGAATCTACAAATATTTTCAGC  
>HPV102\_Alpha\_71726718\_nt5489\_L1\_Tile|1  
ATGTTTCATATACTTCTTCCACGTCTGTTCCCTTGAATCTACAAATATTTTCAGCTACAT  
>HPV102\_Alpha\_71726718\_nt5504\_L1\_Tile|1  
CTTCCACGTCTGTTCCCTTGAATCTACAAATATTTTCAGCTACATCTGTGGTCTCTGCGC  
>HPV102\_Alpha\_71726718\_nt5509\_L1\_Tile|1  
ACGTCTGTTCCCTTGAATCTACAAATATTTTCAGCTACATCTGTGGTCTCTGCGCGGTAT  
>HPV102\_Alpha\_71726718\_nt5514\_L1\_Tile|1  
TGTTCCCTTGAATCTACAAATATTTTCAGCTACATCTGTGGTCTCTGCGCGGTATGACAA  
>HPV102\_Alpha\_71726718\_nt5529\_L1\_Tile|1  
TACAAATATTTTCAGCTACATCTGTGGTCTCTGCGCGGTATGACAATGTCACAGTACCACT  
>HPV102\_Alpha\_71726718\_nt5534\_L1\_Tile|1  
ATATTTTCAGCTACATCTGTGGTCTCTGCGCGGTATGACAATGTCACAGTACCACTCTCTT  
>HPV102\_Alpha\_71726718\_nt5539\_L1\_Tile|1  
TCAGCTACATCTGTGGTCTCTGCGCGGTATGACAATGTCACAGTACCACTCTCTTCTGGG  
>HPV102\_Alpha\_71726718\_nt5544\_L1\_Tile|1  
TACATCTGTGGTCTCTGCGCGGTATGACAATGTCACAGTACCACTCTCTTCTGGGTTTGA  
>HPV102\_Alpha\_71726718\_nt5549\_L1\_Tile|1  
CTGTGGTCTCTGCGCGGTATGACAATGTCACAGTACCACTCTCTTCTGGGTTTGATTTGC  
>HPV102\_Alpha\_71726718\_nt5554\_L1\_Tile|1  
GTCTCTGCGCGGTATGACAATGTCACAGTACCACTCTCTTCTGGGTTTGATTTGCCTGCA  
>HPV102\_Alpha\_71726718\_nt5564\_L1\_Tile|1  
GGTATGACAATGTCACAGTACCACTCTCTTCTGGGTTTGATTTGCCTGCATATACAGGCC  
>HPV102\_Alpha\_71726718\_nt5574\_L1\_Tile|1  
TGTCACAGTACCACTCTCTTCTGGGTTTGATTTGCCTGCATATACAGGCCCTGACATTCC  
>HPV102\_Alpha\_71726718\_nt5579\_L1\_Tile|1  
CAGTACCACTCTCTTCTGGGTTTGATTTGCCTGCATATACAGGCCCTGACATTCCAATTG  
>HPV102\_Alpha\_71726718\_nt5584\_L1\_Tile|1  
CCACTCTCTTCTGGGTTTGATTTGCCTGCATATACAGGCCCTGACATTCCAATTGCCACT  
>HPV102\_Alpha\_71726718\_nt5589\_L1\_Tile|1  
CTCTTCTGGGTTTGATTTGCCTGCATATACAGGCCCTGACATTCCAATTGCCACTCCTAC  
>HPV102\_Alpha\_71726718\_nt5594\_L1\_Tile|1  
CTGGGTTTGATTTGCCTGCATATACAGGCCCTGACATTCCAATTGCCACTCCTACTACCA  
>HPV102\_Alpha\_71726718\_nt5619\_L1\_Tile|1  
AGGCCCTGACATTCCAATTGCCACTCCTACTACCAGTGTGCTGCATGTTTCCCAGTCCTC  
>HPV102\_Alpha\_71726718\_nt5624\_L1\_Tile|1  
CTGACATTCCAATTGCCACTCCTACTACCAGTGTGCTGCATGTTTCCCAGTCCTCTAATG  
>HPV102\_Alpha\_71726718\_nt5629\_L1\_Tile|1  
ATTCCAATTGCCACTCCTACTACCAGTGTGCTGCATGTTTCCCAGTCCTCTAATGTTCCCT  
>HPV102\_Alpha\_71726718\_nt5639\_L1\_Tile|1

CCACTCCTACTACCAGTGTGCTGCATGTTTCCCAGTCCTCTAATGTTTCCTTCCCAATCTG  
>HPV102\_Alpha\_71726718\_nt5644\_L1\_Tile|1  
CCTACTACCAGTGTGCTGCATGTTTCCCAGTCCTCTAATGTTTCCTTCCCAATCTGTGTTT  
>HPV102\_Alpha\_71726718\_nt5649\_L1\_Tile|1  
TACCAGTGTGCTGCATGTTTCCCAGTCCTCTAATGTTTCCTTCCCAATCTGTGTTTGTGGA  
>HPV102\_Alpha\_71726718\_nt5669\_L1\_Tile|1  
CCCAGTCCTCTAATGTTTCCTTCCCAATCTGTGTTTGTGGATGGTACAGACTATTTTTTAT  
>HPV102\_Alpha\_71726718\_nt5679\_L1\_Tile|1  
TAATGTTTCCTTCCCAATCTGTGTTTGTGGATGGTACAGACTATTTTTTATTGCCTAATTA  
>HPV102\_Alpha\_71726718\_nt5684\_L1\_Tile|1  
TTCCTTCCCAATCTGTGTTTGTGGATGGTACAGACTATTTTTTATTGCCTAATTACTTAT  
>HPV102\_Alpha\_71726718\_nt5694\_L1\_Tile|1  
ATCTGTGTTTGTGGATGGTACAGACTATTTTTTATTGCCTAATTACTTATTCTTTCCTAA  
>HPV102\_Alpha\_71726718\_nt6219\_L1\_Tile|1  
ACAATGTTTCTGTAGATTACAAACAAACCCAACTACTTATTATTGGGTGTAAACCCCTA  
>HPV102\_Alpha\_71726718\_nt6224\_L1\_Tile|1  
GTTTCTGTAGATTACAAACAAACCCAACTACTTATTATTGGGTGTAAACCCCTATTGGG  
>HPV102\_Alpha\_71726718\_nt6559\_L1\_Tile|1  
GCATTTCTTTAACAGACATGGAACCATGGGCGAGGAACCTGCCTCCTATTACATACC  
>HPV102\_Alpha\_71726718\_nt6579\_L1\_Tile|1  
GAACCATGGGCGAGGAACCTGCCTCCTATTACATACCTGGCACCTCTGGAAATAATA  
>HPV102\_Alpha\_71726718\_nt6584\_L1\_Tile|1  
ATGGGCGAGGAACCTGCCTCCTATTACATACCTGGCACCTCTGGAAATAATAGACAA  
>HPV102\_Alpha\_71726718\_nt6589\_L1\_Tile|1  
CGAGGAACCTGCCTCCTATTACATACCTGGCACCTCTGGAAATAATAGACAAACTCC  
>HPV102\_Alpha\_71726718\_nt6604\_L1\_Tile|1  
CTCCTATTACATACCTGGCACCTCTGGAAATAATAGACAAACTCCTACCAGTTATGTATA  
>HPV102\_Alpha\_71726718\_nt6609\_L1\_Tile|1  
ATTACATACCTGGCACCTCTGGAAATAATAGACAAACTCCTACCAGTTATGTATATGCCC  
>HPV102\_Alpha\_71726718\_nt7109\_L1\_Tile|1  
CCATATGATGGCCTTGCTTTTTTGGGAGGTGGATCTCAAAGACAAACTGTCTATGGATCTG  
>HPV102\_Alpha\_71726718\_nt7114\_L1\_Tile|1  
TGATGGCCTTGCTTTTTTGGGAGGTGGATCTCAAAGACAAACTGTCTATGGATCTGGATCA  
>HPV103\_Unclassified\_109390382\_nt4981\_L1\_Tile|1  
TCTACCACCTTCTCAGCCAGTGGCTAAAATACTGCCTACTGATGAATACGTTGTGGAAAC  
>HPV103\_Unclassified\_109390382\_nt4986\_L1\_Tile|1  
CACCTTCTCAGCCAGTGGCTAAAATACTGCCTACTGATGAATACGTTGTGGAAACGTCTA  
>HPV103\_Unclassified\_109390382\_nt4991\_L1\_Tile|1  
TCTCAGCCAGTGGCTAAAATACTGCCTACTGATGAATACGTTGTGGAAACGTCTATTTTC  
>HPV103\_Unclassified\_109390382\_nt4996\_L1\_Tile|1  
GCCAGTGGCTAAAATACTGCCTACTGATGAATACGTTGTGGAAACGTCTATTTTCTTCCA  
>HPV103\_Unclassified\_109390382\_nt5016\_L1\_Tile|1  
CTACTGATGAATACGTTGTGGAAACGTCTATTTTCTTCCATGCCTCCAGCGACCGCCTGC  
>HPV103\_Unclassified\_109390382\_nt5021\_L1\_Tile|1  
GATGAATACGTTGTGGAAACGTCTATTTTCTTCCATGCCTCCAGCGACCGCCTGCTTACT  
>HPV103\_Unclassified\_109390382\_nt5031\_L1\_Tile|1  
TTGTGGAAACGTCTATTTTCTTCCATGCCTCCAGCGACCGCCTGCTTACTGTAGGACACC  
>HPV103\_Unclassified\_109390382\_nt5076\_L1\_Tile|1  
TTACTGTAGGACACCCATATTTTCCAATTACAAAAGTGGGTGAAGGTACAATTGTTGTAC  
>HPV103\_Unclassified\_109390382\_nt5081\_L1\_Tile|1  
GTAGGACACCCATATTTTCCAATTACAAAAGTGGGTGAAGGTACAATTGTTGTACCTAAG  
>HPV103\_Unclassified\_109390382\_nt5086\_L1\_Tile|1  
ACACCCATATTTTCCAATTACAAAAGTGGGTGAAGGTACAATTGTTGTACCTAAGGTATC  
>HPV103\_Unclassified\_109390382\_nt5091\_L1\_Tile|1  
CATATTTTCCAATTACAAAAGTGGGTGAAGGTACAATTGTTGTACCTAAGGTATCTGGTA

>HPV103\_Unclassified\_109390382\_nt5096\_L1\_Tile|1  
TTTCCAATTACAAAAGTGGGTGAAGGTACAATTGTTGTACCTAAGGTATCTGGTAATCAA  
>HPV103\_Unclassified\_109390382\_nt5101\_L1\_Tile|1  
AATTACAAAAGTGGGTGAAGGTACAATTGTTGTACCTAAGGTATCTGGTAATCAATTCAG  
>HPV103\_Unclassified\_109390382\_nt5106\_L1\_Tile|1  
CAAAAGTGGGTGAAGGTACAATTGTTGTACCTAAGGTATCTGGTAATCAATTCAGGGCCT  
>HPV103\_Unclassified\_109390382\_nt5116\_L1\_Tile|1  
TGAAGGTACAATTGTTGTACCTAAGGTATCTGGTAATCAATTCAGGGCCTTTCACATCCT  
>HPV103\_Unclassified\_109390382\_nt5121\_L1\_Tile|1  
GTACAATTGTTGTACCTAAGGTATCTGGTAATCAATTCAGGGCCTTTCACATCCTTTTAC  
>HPV103\_Unclassified\_109390382\_nt5141\_L1\_Tile|1  
GTATCTGGTAATCAATTCAGGGCCTTTCACATCCTTTTACCTGATCCTAACAAAGTTGGCA  
>HPV103\_Unclassified\_109390382\_nt5146\_L1\_Tile|1  
TGGTAATCAATTCAGGGCCTTTCACATCCTTTTACCTGATCCTAACAAAGTTGGCACTTGT  
>HPV103\_Unclassified\_109390382\_nt5151\_L1\_Tile|1  
ATCAATTCAGGGCCTTTCACATCCTTTTACCTGATCCTAACAAAGTTGGCACTTGTGGATT  
>HPV103\_Unclassified\_109390382\_nt5161\_L1\_Tile|1  
GGCCTTTCACATCCTTTTACCTGATCCTAACAAAGTTGGCACTTGTGGATTCCAATATATA  
>HPV103\_Unclassified\_109390382\_nt5166\_L1\_Tile|1  
TTCACATCCTTTTACCTGATCCTAACAAAGTTGGCACTTGTGGATTCCAATATATATAATG  
>HPV103\_Unclassified\_109390382\_nt5171\_L1\_Tile|1  
ATCCTTTTACCTGATCCTAACAAAGTTGGCACTTGTGGATTCCAATATATATAATGCCGAG  
>HPV103\_Unclassified\_109390382\_nt5176\_L1\_Tile|1  
TTTACCTGATCCTAACAAAGTTGGCACTTGTGGATTCCAATATATATAATGCCGAGTCAGA  
>HPV103\_Unclassified\_109390382\_nt5181\_L1\_Tile|1  
CTGATCCTAACAAAGTTGGCACTTGTGGATTCCAATATATATAATGCCGAGTCAGAACGGC  
>HPV103\_Unclassified\_109390382\_nt5186\_L1\_Tile|1  
CCTAACAAAGTTGGCACTTGTGGATTCCAATATATATAATGCCGAGTCAGAACGGCTTGT  
>HPV103\_Unclassified\_109390382\_nt5191\_L1\_Tile|1  
CAAGTTGGCACTTGTGGATTCCAATATATATAATGCCGAGTCAGAACGGCTTGTGGAA  
>HPV103\_Unclassified\_109390382\_nt5201\_L1\_Tile|1  
CTTGTGGATTCCAATATATATAATGCCGAGTCAGAACGGCTTGTGGAAAGTTACGGGGT  
>HPV103\_Unclassified\_109390382\_nt5206\_L1\_Tile|1  
GGATTCCAATATATATAATGCCGAGTCAGAACGGCTTGTGGAAAGTTACGGGGTCTGGA  
>HPV103\_Unclassified\_109390382\_nt5216\_L1\_Tile|1  
ATATATAATGCCGAGTCAGAACGGCTTGTGGAAAGTTACGGGGTCTGGATATTGGTCGT  
>HPV103\_Unclassified\_109390382\_nt5221\_L1\_Tile|1  
TAATGCCGAGTCAGAACGGCTTGTGGAAAGTTACGGGGTCTGGATATTGGTCGTGGTGG  
>HPV103\_Unclassified\_109390382\_nt5226\_L1\_Tile|1  
CCGAGTCAGAACGGCTTGTGGAAAGTTACGGGGTCTGGATATTGGTCGTGGTGGACCCC  
>HPV103\_Unclassified\_109390382\_nt5231\_L1\_Tile|1  
TCAGAACGGCTTGTGGAAAGTTACGGGGTCTGGATATTGGTCGTGGTGGACCCCTTAGC  
>HPV103\_Unclassified\_109390382\_nt5236\_L1\_Tile|1  
ACGGCTTGTGGAAAGTTACGGGGTCTGGATATTGGTCGTGGTGGACCCCTTAGCGTTGG  
>HPV103\_Unclassified\_109390382\_nt5241\_L1\_Tile|1  
TTGTTTGGAAAGTTACGGGGTCTGGATATTGGTCGTGGTGGACCCCTTAGCGTTGGCTCTT  
>HPV103\_Unclassified\_109390382\_nt5246\_L1\_Tile|1  
TGGAAGTTACGGGGTCTGGATATTGGTCGTGGTGGACCCCTTAGCGTTGGCTCTTCTGGA  
>HPV103\_Unclassified\_109390382\_nt5251\_L1\_Tile|1  
GTTACGGGGTCTGGATATTGGTCGTGGTGGACCCCTTAGCGTTGGCTCTTCTGGACACCC  
>HPV103\_Unclassified\_109390382\_nt5261\_L1\_Tile|1  
CTGGATATTGGTCGTGGTGGACCCCTTAGCGTTGGCTCTTCTGGACACCCCTTATTTAAT  
>HPV103\_Unclassified\_109390382\_nt5271\_L1\_Tile|1  
GTCGTGGTGGACCCCTTAGCGTTGGCTCTTCTGGACACCCCTTATTTAATAAACTTAAGG  
>HPV103\_Unclassified\_109390382\_nt5276\_L1\_Tile|1

GGTGGACCCCTTAGCGTTGGCTCTTCTGGACACCCCTTTATTTAATAAACTTAAGGATACT  
>HPV103\_Unclassified\_109390382\_nt5281\_L1\_Tile|1  
ACCCCTTAGCGTTGGCTCTTCTGGACACCCCTTTATTTAATAAACTTAAGGATACTGAAAA  
>HPV103\_Unclassified\_109390382\_nt5301\_L1\_Tile|1  
CTGGACACCCCTTTATTTAATAAACTTAAGGATACTGAAAATCCTAATAGTTATGTTAAAA  
>HPV103\_Unclassified\_109390382\_nt5306\_L1\_Tile|1  
CACCCCTTTATTTAATAAACTTAAGGATACTGAAAATCCTAATAGTTATGTTAAAACAGGA  
>HPV103\_Unclassified\_109390382\_nt5311\_L1\_Tile|1  
TTTATTTAATAAACTTAAGGATACTGAAAATCCTAATAGTTATGTTAAAACAGGAAAGGA  
>HPV103\_Unclassified\_109390382\_nt5316\_L1\_Tile|1  
TTAATAAACTTAAGGATACTGAAAATCCTAATAGTTATGTTAAAACAGGAAAGGAAAAACA  
>HPV103\_Unclassified\_109390382\_nt5321\_L1\_Tile|1  
AAACTTAAGGATACTGAAAATCCTAATAGTTATGTTAAAACAGGAAAGGAAAAACAGACAA  
>HPV103\_Unclassified\_109390382\_nt5326\_L1\_Tile|1  
TAAGGATACTGAAAATCCTAATAGTTATGTTAAAACAGGAAAGGAAAAACAGACAAAGTGT  
>HPV103\_Unclassified\_109390382\_nt5331\_L1\_Tile|1  
ATACTGAAAATCCTAATAGTTATGTTAAAACAGGAAAGGAAAAACAGACAAAGTGTCTCTA  
>HPV103\_Unclassified\_109390382\_nt5336\_L1\_Tile|1  
GAAAATCCTAATAGTTATGTTAAAACAGGAAAGGAAAAACAGACAAAGTGTCTCTATGGAC  
>HPV103\_Unclassified\_109390382\_nt5341\_L1\_Tile|1  
TCCTAATAGTTATGTTAAAACAGGAAAGGAAAAACAGACAAAGTGTCTCTATGGACCCAAA  
>HPV103\_Unclassified\_109390382\_nt5346\_L1\_Tile|1  
ATAGTTATGTTAAAACAGGAAAGGAAAAACAGACAAAGTGTCTCTATGGACCCAAAGCAAA  
>HPV103\_Unclassified\_109390382\_nt5356\_L1\_Tile|1  
TAAAACAGGAAAGGAAAAACAGACAAAGTGTCTCTATGGACCCAAAGCAAACTCAGCTATT  
>HPV103\_Unclassified\_109390382\_nt5361\_L1\_Tile|1  
CAGGAAAGGAAAAACAGACAAAGTGTCTCTATGGACCCAAAGCAAACTCAGCTATTTGTAG  
>HPV103\_Unclassified\_109390382\_nt5366\_L1\_Tile|1  
AAGGAAAAACAGACAAAGTGTCTCTATGGACCCAAAGCAAACTCAGCTATTTGTAGTAGGC  
>HPV103\_Unclassified\_109390382\_nt5406\_L1\_Tile|1  
CTCAGCTATTTGTAGTAGGCTGTACTCCTTGTTTGGGGGAGCATTGGGATGCTGCAAAGC  
>HPV103\_Unclassified\_109390382\_nt5451\_L1\_Tile|1  
GGGATGCTGCAAAGCCATGTGCAGATGCTAGGCAGGATATGGGTGCATGTCCTCCTTTAG  
>HPV103\_Unclassified\_109390382\_nt5466\_L1\_Tile|1  
CATGTGCAGATGCTAGGCAGGATATGGGTGCATGTCCTCCTTTAGAGCTTGTTAGTTCCA  
>HPV103\_Unclassified\_109390382\_nt5471\_L1\_Tile|1  
GCAGATGCTAGGCAGGATATGGGTGCATGTCCTCCTTTAGAGCTTGTTAGTTCCATTATT  
>HPV103\_Unclassified\_109390382\_nt5566\_L1\_Tile|1  
AATGAATTTTGCTACATTGCAGGAGGACCATTCAGGTGTACCCTTGGACATTGTAGCTTC  
>HPV103\_Unclassified\_109390382\_nt5571\_L1\_Tile|1  
ATTTTGCTACATTGCAGGAGGACCATTCAGGTGTACCCTTGGACATTGTAGCTTCTAAAT  
>HPV103\_Unclassified\_109390382\_nt5576\_L1\_Tile|1  
GCTACATTGCAGGAGGACCATTCAGGTGTACCCTTGGACATTGTAGCTTCTAAATGTAAA  
>HPV103\_Unclassified\_109390382\_nt5581\_L1\_Tile|1  
ATTGCAGGAGGACCATTCAGGTGTACCCTTGGACATTGTAGCTTCTAAATGTAAATGGCC  
>HPV103\_Unclassified\_109390382\_nt5586\_L1\_Tile|1  
AGGAGGACCATTCAGGTGTACCCTTGGACATTGTAGCTTCTAAATGTAAATGGCCTGATT  
>HPV103\_Unclassified\_109390382\_nt5591\_L1\_Tile|1  
GACCATTCAGGTGTACCCTTGGACATTGTAGCTTCTAAATGTAAATGGCCTGATTTTCTT  
>HPV103\_Unclassified\_109390382\_nt5596\_L1\_Tile|1  
TTCAGGTGTACCCTTGGACATTGTAGCTTCTAAATGTAAATGGCCTGATTTTCTTAGAAT  
>HPV103\_Unclassified\_109390382\_nt5631\_L1\_Tile|1  
GTAAATGGCCTGATTTTCTTAGAATGGCAAATGACACATATGGCAATCAAATGTTTTTCT  
>HPV103\_Unclassified\_109390382\_nt5636\_L1\_Tile|1  
TGGCCTGATTTTCTTAGAATGGCAAATGACACATATGGCAATCAAATGTTTTTCTTTGGA



>HPV103\_Unclassified\_109390382\_nt5646\_L1\_Tile|1  
TTCTTAGAATGGCAAATGACACATATGGCAATCAAATGTTTTCTTTGGAAGACGTGAGC  
>HPV103\_Unclassified\_109390382\_nt5651\_L1\_Tile|1  
AGAATGGCAAATGACACATATGGCAATCAAATGTTTTCTTTGGAAGACGTGAGCAGTTG  
>HPV103\_Unclassified\_109390382\_nt5656\_L1\_Tile|1  
GGCAAATGACACATATGGCAATCAAATGTTTTCTTTGGAAGACGTGAGCAGTTGTATGC  
>HPV103\_Unclassified\_109390382\_nt5661\_L1\_Tile|1  
ATGACACATATGGCAATCAAATGTTTTCTTTGGAAGACGTGAGCAGTTGTATGCTCGCC  
>HPV103\_Unclassified\_109390382\_nt5671\_L1\_Tile|1  
TGGCAATCAAATGTTTTCTTTGGAAGACGTGAGCAGTTGTATGCTCGCCACTTTTTTGC  
>HPV103\_Unclassified\_109390382\_nt5676\_L1\_Tile|1  
ATCAAATGTTTTCTTTGGAAGACGTGAGCAGTTGTATGCTCGCCACTTTTTTGCTAGGG  
>HPV103\_Unclassified\_109390382\_nt5696\_L1\_Tile|1  
AGACGTGAGCAGTTGTATGCTCGCCACTTTTTGCTAGGGATGGTGTTCATGGGCGACAGT  
>HPV103\_Unclassified\_109390382\_nt5701\_L1\_Tile|1  
TGAGCAGTTGTATGCTCGCCACTTTTTGCTAGGGATGGTGTTCATGGGCGACAGTATACC  
>HPV103\_Unclassified\_109390382\_nt5716\_L1\_Tile|1  
TCGCCACTTTTTGCTAGGGATGGTGTTCATGGGCGACAGTATACCTGAGGCTGAATTTGA  
>HPV103\_Unclassified\_109390382\_nt5721\_L1\_Tile|1  
ACTTTTTTGCTAGGGATGGTGTTCATGGGCGACAGTATACCTGAGGCTGAATTTGAGGGTG  
>HPV103\_Unclassified\_109390382\_nt5726\_L1\_Tile|1  
TTTGCTAGGGATGGTGTTCATGGGCGACAGTATACCTGAGGCTGAATTTGAGGGTGTTAAG  
>HPV103\_Unclassified\_109390382\_nt5731\_L1\_Tile|1  
TAGGGATGGTGTTCATGGGCGACAGTATACCTGAGGCTGAATTTGAGGGTGTTAAGCACAC  
>HPV103\_Unclassified\_109390382\_nt5741\_L1\_Tile|1  
GTCATGGGCGACAGTATACCTGAGGCTGAATTTGAGGGTGTTAAGCACACCTATATTTTA  
>HPV103\_Unclassified\_109390382\_nt5746\_L1\_Tile|1  
GGGCGACAGTATACCTGAGGCTGAATTTGAGGGTGTTAAGCACACCTATATTTTACAGGG  
>HPV103\_Unclassified\_109390382\_nt5766\_L1\_Tile|1  
CTGAATTTGAGGGTGTTAAGCACACCTATATTTTACAGGGGGCGTCTGACAAAGACCAAA  
>HPV103\_Unclassified\_109390382\_nt5771\_L1\_Tile|1  
TTTGAGGGTGTTAAGCACACCTATATTTTACAGGGGGCGTCTGACAAAGACCAAAATACA  
>HPV103\_Unclassified\_109390382\_nt5781\_L1\_Tile|1  
TTAAGCACACCTATATTTTACAGGGGGCGTCTGACAAAGACCAAAATACAGCCTCCTCGT  
>HPV103\_Unclassified\_109390382\_nt5786\_L1\_Tile|1  
CACACCTATATTTTACAGGGGGCGTCTGACAAAGACCAAAATACAGCCTCCTCGTCTGTT  
>HPV103\_Unclassified\_109390382\_nt5791\_L1\_Tile|1  
CTATATTTTACAGGGGGCGTCTGACAAAGACCAAAATACAGCCTCCTCGTCTGTTTACTA  
>HPV103\_Unclassified\_109390382\_nt5811\_L1\_Tile|1  
CTGACAAAGACCAAAATACAGCCTCCTCGTCTGTTTACTATGCAACCCCCAGTGGATCAC  
>HPV103\_Unclassified\_109390382\_nt5816\_L1\_Tile|1  
AAAGACCAAAATACAGCCTCCTCGTCTGTTTACTATGCAACCCCCAGTGGATCACTGGTT  
>HPV103\_Unclassified\_109390382\_nt5821\_L1\_Tile|1  
CCAAAATACAGCCTCCTCGTCTGTTTACTATGCAACCCCCAGTGGATCACTGGTTTCTAG  
>HPV103\_Unclassified\_109390382\_nt5826\_L1\_Tile|1  
ATACAGCCTCCTCGTCTGTTTACTATGCAACCCCCAGTGGATCACTGGTTTCTAGTGATT  
>HPV103\_Unclassified\_109390382\_nt5836\_L1\_Tile|1  
CTCGTCTGTTTACTATGCAACCCCCAGTGGATCACTGGTTTCTAGTGATTCTCAGTTGTT  
>HPV103\_Unclassified\_109390382\_nt5841\_L1\_Tile|1  
CTGTTTACTATGCAACCCCCAGTGGATCACTGGTTTCTAGTGATTCTCAGTTGTTTGGCA  
>HPV103\_Unclassified\_109390382\_nt5866\_L1\_Tile|1  
ATCACTGGTTTCTAGTGATTCTCAGTTGTTTGGCAGACCATACTGGATACAAAAGGCTCA  
>HPV103\_Unclassified\_109390382\_nt5886\_L1\_Tile|1  
CTCAGTTGTTTGGCAGACCATACTGGATACAAAAGGCTCAGGGCCCTAATAATAGTGTGT  
>HPV103\_Unclassified\_109390382\_nt5896\_L1\_Tile|1

TGGCAGACCATACTGGATACAAAAGGCTCAGGGCCCTAATAATAGTGTGTGTTGGAGAAA  
>HPV103\_Unclassified\_109390382\_nt5901\_L1\_Tile|1  
GACCATACTGGATACAAAAGGCTCAGGGCCCTAATAATAGTGTGTGTTGGAGAAATAATT  
>HPV103\_Unclassified\_109390382\_nt5941\_L1\_Tile|1  
TGTGTGTTGGAGAAATAATTTATTTATTACATTGGTTGATAACACACACAATGTAAATTT  
>HPV103\_Unclassified\_109390382\_nt5946\_L1\_Tile|1  
GTTGGAGAAATAATTTATTTATTACATTGGTTGATAACACACACAATGTAAATTTTACAA  
>HPV103\_Unclassified\_109390382\_nt5951\_L1\_Tile|1  
AGAAATAATTTATTTATTACATTGGTTGATAACACACACAATGTAAATTTTACAATAAAT  
>HPV103\_Unclassified\_109390382\_nt5956\_L1\_Tile|1  
TAATTTATTTATTACATTGGTTGATAACACACACAATGTAAATTTTACAATAAATGTTAA  
>HPV103\_Unclassified\_109390382\_nt5961\_L1\_Tile|1  
TATTTATTACATTGGTTGATAACACACACAATGTAAATTTTACAATAAATGTTAAGTCAG  
>HPV103\_Unclassified\_109390382\_nt5966\_L1\_Tile|1  
ATTACATTGGTTGATAACACACACAATGTAAATTTTACAATAAATGTTAAGTCAGACGCT  
>HPV103\_Unclassified\_109390382\_nt5971\_L1\_Tile|1  
ATTGGTTGATAACACACACAATGTAAATTTTACAATAAATGTTAAGTCAGACGCTGGCGT  
>HPV103\_Unclassified\_109390382\_nt5976\_L1\_Tile|1  
TTGATAACACACACAATGTAAATTTTACAATAAATGTTAAGTCAGACGCTGGCGTTGCAC  
>HPV103\_Unclassified\_109390382\_nt5986\_L1\_Tile|1  
ACACAATGTAAATTTTACAATAAATGTTAAGTCAGACGCTGGCGTTGCACAGCAATATGC  
>HPV103\_Unclassified\_109390382\_nt5991\_L1\_Tile|1  
ATGTAAATTTTACAATAAATGTTAAGTCAGACGCTGGCGTTGCACAGCAATATGCTGCCA  
>HPV103\_Unclassified\_109390382\_nt6016\_L1\_Tile|1  
GTCAGACGCTGGCGTTGCACAGCAATATGCTGCCACCAGCTATAAACATTATCTGCGACA  
>HPV103\_Unclassified\_109390382\_nt6026\_L1\_Tile|1  
GGCGTTGCACAGCAATATGCTGCCACCAGCTATAAACATTATCTGCGACATGTAGAGGAA  
>HPV103\_Unclassified\_109390382\_nt6031\_L1\_Tile|1  
TGCACAGCAATATGCTGCCACCAGCTATAAACATTATCTGCGACATGTAGAGGAATTTGA  
>HPV103\_Unclassified\_109390382\_nt6051\_L1\_Tile|1  
CCAGCTATAAACATTATCTGCGACATGTAGAGGAATTTGAGATTGCTCTTATATTGCAAT  
>HPV103\_Unclassified\_109390382\_nt6056\_L1\_Tile|1  
TATAAACATTATCTGCGACATGTAGAGGAATTTGAGATTGCTCTTATATTGCAATTATGC  
>HPV103\_Unclassified\_109390382\_nt6061\_L1\_Tile|1  
ACATTATCTGCGACATGTAGAGGAATTTGAGATTGCTCTTATATTGCAATTATGCAAGGT  
>HPV103\_Unclassified\_109390382\_nt6071\_L1\_Tile|1  
CGACATGTAGAGGAATTTGAGATTGCTCTTATATTGCAATTATGCAAGGTTCTCTCACA  
>HPV103\_Unclassified\_109390382\_nt6081\_L1\_Tile|1  
AGGAATTTGAGATTGCTCTTATATTGCAATTATGCAAGGTTCTCTCACAGCTGATGTAT  
>HPV103\_Unclassified\_109390382\_nt6086\_L1\_Tile|1  
TTTGAGATTGCTCTTATATTGCAATTATGCAAGGTTCTCTCACAGCTGATGTATTAGCC  
>HPV103\_Unclassified\_109390382\_nt6091\_L1\_Tile|1  
GATTGCTCTTATATTGCAATTATGCAAGGTTCTCTCACAGCTGATGTATTAGCCCATAT  
>HPV103\_Unclassified\_109390382\_nt6096\_L1\_Tile|1  
CTCTTATATTGCAATTATGCAAGGTTCTCTCACAGCTGATGTATTAGCCCATATACATG  
>HPV103\_Unclassified\_109390382\_nt6101\_L1\_Tile|1  
ATATTGCAATTATGCAAGGTTCTCTCACAGCTGATGTATTAGCCCATATACATGTAATG  
>HPV103\_Unclassified\_109390382\_nt6106\_L1\_Tile|1  
GCAATTATGCAAGGTTCTCTCACAGCTGATGTATTAGCCCATATACATGTAATGGATCC  
>HPV103\_Unclassified\_109390382\_nt6116\_L1\_Tile|1  
AAGGTTCTCTCACAGCTGATGTATTAGCCCATATACATGTAATGGATCCAGCTATAATT  
>HPV103\_Unclassified\_109390382\_nt6121\_L1\_Tile|1  
TCCTCTCACAGCTGATGTATTAGCCCATATACATGTAATGGATCCAGCTATAATTGAGGA  
>HPV103\_Unclassified\_109390382\_nt6131\_L1\_Tile|1  
GCTGATGTATTAGCCCATATACATGTAATGGATCCAGCTATAATTGAGGACTGGCAGCTA

>HPV103\_Unclassified\_109390382\_nt6136\_L1\_Tile|1  
TGTATTAGCCCATATACATGTAATGGATCCAGCTATAATTGAGGACTGGCAGCTAGGGTT  
>HPV103\_Unclassified\_109390382\_nt6141\_L1\_Tile|1  
TAGCCCATATACATGTAATGGATCCAGCTATAATTGAGGACTGGCAGCTAGGGTTTGTAC  
>HPV103\_Unclassified\_109390382\_nt6146\_L1\_Tile|1  
CATATACATGTAATGGATCCAGCTATAATTGAGGACTGGCAGCTAGGGTTTGTACCACCG  
>HPV103\_Unclassified\_109390382\_nt6156\_L1\_Tile|1  
TAATGGATCCAGCTATAATTGAGGACTGGCAGCTAGGGTTTGTACCACCGCCTCCTTCTT  
>HPV103\_Unclassified\_109390382\_nt6161\_L1\_Tile|1  
GATCCAGCTATAATTGAGGACTGGCAGCTAGGGTTTGTACCACCGCCTCCTTCTTCTATT  
>HPV103\_Unclassified\_109390382\_nt6166\_L1\_Tile|1  
AGCTATAATTGAGGACTGGCAGCTAGGGTTTGTACCACCGCCTCCTTCTTCTATTGGAGA  
>HPV103\_Unclassified\_109390382\_nt6171\_L1\_Tile|1  
TAATTGAGGACTGGCAGCTAGGGTTTGTACCACCGCCTCCTTCTTCTATTGGAGATACAT  
>HPV103\_Unclassified\_109390382\_nt6176\_L1\_Tile|1  
GAGGACTGGCAGCTAGGGTTTGTACCACCGCCTCCTTCTTCTATTGGAGATACATACAGA  
>HPV103\_Unclassified\_109390382\_nt6181\_L1\_Tile|1  
CTGGCAGCTAGGGTTTGTACCACCGCCTCCTTCTTCTATTGGAGATACATACAGATTTTT  
>HPV103\_Unclassified\_109390382\_nt6186\_L1\_Tile|1  
AGCTAGGGTTTGTACCACCGCCTCCTTCTTCTATTGGAGATACATACAGATTTTTTAACAT  
>HPV103\_Unclassified\_109390382\_nt6201\_L1\_Tile|1  
CACCGCCTCCTTCTTCTATTGGAGATACATACAGATTTTTTAACATCTTTAGCCACACGCT  
>HPV103\_Unclassified\_109390382\_nt6211\_L1\_Tile|1  
TTCTTCTATTGGAGATACATACAGATTTTTTAACATCTTTAGCCACACGCTGCCCTGCTGC  
>HPV103\_Unclassified\_109390382\_nt6216\_L1\_Tile|1  
CTATTGGAGATACATACAGATTTTTTAACATCTTTAGCCACACGCTGCCCTGCTGCAGAAC  
>HPV103\_Unclassified\_109390382\_nt6226\_L1\_Tile|1  
TACATACAGATTTTTTAACATCTTTAGCCACACGCTGCCCTGCTGCAGAACCTCCCAAGGA  
>HPV103\_Unclassified\_109390382\_nt6241\_L1\_Tile|1  
AACATCTTTAGCCACACGCTGCCCTGCTGCAGAACCTCCCAAGGAAAAACAGGACCCATA  
>HPV103\_Unclassified\_109390382\_nt6246\_L1\_Tile|1  
CTTTAGCCACACGCTGCCCTGCTGCAGAACCTCCCAAGGAAAAACAGGACCCATATGATA  
>HPV103\_Unclassified\_109390382\_nt6346\_L1\_Tile|1  
CTCTGATCTTGACAGATATCCTTTGGGTGCGAGATTTTTATCTCAAACCTGGGGTTAGCTC  
>HPV103\_Unclassified\_109390382\_nt6351\_L1\_Tile|1  
ATCTTGACAGATATCCTTTGGGTGCGAGATTTTTATCTCAAACCTGGGGTTAGCTCGTCTT  
>HPV103\_Unclassified\_109390382\_nt6356\_L1\_Tile|1  
GACAGATATCCTTTGGGTGCGAGATTTTTATCTCAAACCTGGGGTTAGCTCGTCTTCTACC  
>HPV103\_Unclassified\_109390382\_nt6361\_L1\_Tile|1  
ATATCCTTTGGGTGCGAGATTTTTATCTCAAACCTGGGGTTAGCTCGTCTTCTACCTCCTC  
>HPV103\_Unclassified\_109390382\_nt6366\_L1\_Tile|1  
CTTTGGGTGCGAGATTTTTATCTCAAACCTGGGGTTAGCTCGTCTTCTACCTCCTCTAGAA  
>HPV103\_Unclassified\_109390382\_nt6376\_L1\_Tile|1  
CAGATTTTTATCTCAAACCTGGGGTTAGCTCGTCTTCTACCTCCTCTAGAAAGCGGTCTCG  
>HPV103\_Unclassified\_109390382\_nt6381\_L1\_Tile|1  
TTTTATCTCAAACCTGGGGTTAGCTCGTCTTCTACCTCCTCTAGAAAGCGGTCTCGTGTAG  
>HPV103\_Unclassified\_109390382\_nt6386\_L1\_Tile|1  
TCTCAAACCTGGGGTTAGCTCGTCTTCTACCTCCTCTAGAAAGCGGTCTCGTGTAGAGACC  
>HPV103\_Unclassified\_109390382\_nt6391\_L1\_Tile|1  
AACTGGGGTTAGCTCGTCTTCTACCTCCTCTAGAAAGCGGTCTCGTGTAGAGACCCCTAC  
>HPV103\_Unclassified\_109390382\_nt6396\_L1\_Tile|1  
GGGTAGCTCGTCTTCTACCTCCTCTAGAAAGCGGTCTCGTGTAGAGACCCCTACCCGCC  
>HPV103\_Unclassified\_109390382\_nt6401\_L1\_Tile|1  
AGCTCGTCTTCTACCTCCTCTAGAAAGCGGTCTCGTGTAGAGACCCCTACCCGCCAGTA  
>HPV103\_Unclassified\_109390382\_nt6406\_L1\_Tile|1

GTCTTCTACCTCCTCTAGAAAGCGGTCTCGTGTAGAGACCCCTACCCGCCAGTACGGTC  
>HPV103\_Unclassified\_109390382\_nt6411\_L1\_Tile|1  
CTACCTCCTCTAGAAAGCGGTCTCGTGTAGAGACCCCTACCCGCCAGTACGGTCTGCTA  
>HPV103\_Unclassified\_109390382\_nt6416\_L1\_Tile|1  
TCCTCTAGAAAGCGGTCTCGTGTAGAGACCCCTACCCGCCAGTACGGTCTGCTAAAAA  
>HPV103\_Unclassified\_109390382\_nt6421\_L1\_Tile|1  
TAGAAAGCGGTCTCGTGTAGAGACCCCTACCCGCCAGTACGGTCTGCTAAAAACGTAG  
>HPV103\_Unclassified\_109390382\_nt6426\_L1\_Tile|1  
AGCGGTCTCGTGTAGAGACCCCTACCCGCCAGTACGGTCTGCTAAAAACGTAGACGGG  
>HPV103\_Unclassified\_109390382\_nt6431\_L1\_Tile|1  
TCTCGTGTAGAGACCCCTACCCGCCAGTACGGTCTGCTAAAAACGTAGACGGGGGGTT  
>HPV103\_Unclassified\_109390382\_nt6434\_L1\_Tile|1  
CGTGTAGAGACCCCTACCCGCCAGTACGGTCTGCTAAAAACGTAGACGGGGGGTTTAA  
>HPV106\_Alpha\_71726710\_nt5675\_L1\_Tile|1  
CTGGTCACCCACAGGCGATGTGCTTGTGCACGGGTCTACATATTATTTATTGCCCTCAT  
>HPV106\_Alpha\_71726710\_nt5685\_L1\_Tile|1  
CACAGGCGATGTGCTTGTGCACGGGTCTACATATTATTTATTGCCCTCATATGTGTTGCT  
>HPV106\_Alpha\_71726710\_nt5895\_L1\_Tile|1  
GCAGTTCCCGATTGCTGACCGTAGGTCATCCATATTATCCTATCAAAAAGCAAAGTGGAC  
>HPV106\_Alpha\_71726710\_nt5900\_L1\_Tile|1  
TCCCGATTGCTGACCGTAGGTCATCCATATTATCCTATCAAAAAGCAAAGTGGACGGAAC  
>HPV106\_Alpha\_71726710\_nt5905\_L1\_Tile|1  
ATTGCTGACCGTAGGTCATCCATATTATCCTATCAAAAAGCAAAGTGGACGGAACCTAT  
>HPV106\_Alpha\_71726710\_nt6270\_L1\_Tile|1  
AACCGCCATTGGGCGAACACTGGGCAAAAGGCACTCCATGCAATACCTCCAATGTCACTG  
>HPV106\_Alpha\_71726710\_nt6275\_L1\_Tile|1  
CCATTGGGCGAACACTGGGCAAAAGGCACTCCATGCAATACCTCCAATGTCACTGCAGGG  
>HPV106\_Alpha\_71726710\_nt6555\_L1\_Tile|1  
TTAGGCATTTTTACAACAGGGCCGGTACCATGGGGGAGGATGTTCCGGAAGGGTTTTTAC  
>HPV106\_Alpha\_71726710\_nt6560\_L1\_Tile|1  
CATTTTTACAACAGGGCCGGTACCATGGGGGAGGATGTTCCGGAAGGGTTTTTACTAAAG  
>HPV106\_Alpha\_71726710\_nt6565\_L1\_Tile|1  
TTACAACAGGGCCGGTACCATGGGGGAGGATGTTCCGGAAGGGTTTTTACTAAAGGGGCC  
>HPV106\_Alpha\_71726710\_nt6570\_L1\_Tile|1  
ACAGGGCCGGTACCATGGGGGAGGATGTTCCGGAAGGGTTTTTACTAAAGGGGCCTACTA  
>HPV106\_Alpha\_71726710\_nt6575\_L1\_Tile|1  
GCCGGTACCATGGGGGAGGATGTTCCGGAAGGGTTTTTACTAAAGGGGCCTACTACTACA  
>HPV106\_Alpha\_71726710\_nt6580\_L1\_Tile|1  
TACCATGGGGGAGGATGTTCCGGAAGGGTTTTTACTAAAGGGGCCTACTACTACATCCCG  
>HPV106\_Alpha\_71726710\_nt6590\_L1\_Tile|1  
GAGGATGTTCCGGAAGGGTTTTTACTAAAGGGGCCTACTACTACATCCCGCGCCTCTGCT  
>HPV106\_Alpha\_71726710\_nt6595\_L1\_Tile|1  
TGTTCCGGAAGGGTTTTTACTAAAGGGGCCTACTACTACATCCCGCGCCTCTGCTACAAG  
>HPV106\_Alpha\_71726710\_nt6605\_L1\_Tile|1  
GGGTTTTTACTAAAGGGGCCTACTACTACATCCCGCGCCTCTGCTACAAGCTCACTATAT  
>HPV106\_Alpha\_71726710\_nt6610\_L1\_Tile|1  
TTTACTAAAGGGGCCTACTACTACATCCCGCGCCTCTGCTACAAGCTCACTATATGGGTC  
>HPV106\_Alpha\_71726710\_nt6995\_L1\_Tile|1  
AATTTTGGGTTCGTTGCCCCCCCCTACCGCCAGTCTTGGCGATACCTATAGGTTTTTACAG  
>HPV106\_Alpha\_71726710\_nt7070\_L1\_Tile|1  
TGTCAAAAGCCCTCCGCGCGCCTGCAAAAGAAAAGGACCCTTACGATGGGCTTACGTTT  
>HPV106\_Alpha\_71726710\_nt7130\_L1\_Tile|1  
TGGGATGTGGATTTATCAGAGCGCTTTTCCCTTGAGCTTGACCAGTTTCCCTTGGGTAGG  
>HPV106\_Alpha\_71726710\_nt7240\_L1\_Tile|1  
TAAGCGTCCTGCACCATCGTCCACCCACCAGCCACAAAGCGTAAACGGTCCAAGCGTTC

>HPV107\_Beta\_126131393\_nt5829\_L1\_Tile|1  
CACCATCAACTCCGGTGGCACGGGTGCTAAGTACCGATGAGTACGTGGAGCGGACCAATA  
>HPV107\_Beta\_126131393\_nt5834\_L1\_Tile|1  
TCAACTCCGGTGGCACGGGTGCTAAGTACCGATGAGTACGTGGAGCGGACCAATATATTT  
>HPV107\_Beta\_126131393\_nt5839\_L1\_Tile|1  
TCCGGTGGCACGGGTGCTAAGTACCGATGAGTACGTGGAGCGGACCAATATATTTTTATCA  
>HPV107\_Beta\_126131393\_nt5849\_L1\_Tile|1  
CGGGTGTCTAAGTACCGATGAGTACGTGGAGCGGACCAATATATTTTTATCACGCCACTAGT  
>HPV107\_Beta\_126131393\_nt5854\_L1\_Tile|1  
GCTAAGTACCGATGAGTACGTGGAGCGGACCAATATATTTTTATCACGCCACTAGTGACAG  
>HPV107\_Beta\_126131393\_nt5859\_L1\_Tile|1  
GTACCGATGAGTACGTGGAGCGGACCAATATATTTTTATCACGCCACTAGTGACAGATTAT  
>HPV107\_Beta\_126131393\_nt5864\_L1\_Tile|1  
GATGAGTACGTGGAGCGGACCAATATATTTTTATCACGCCACTAGTGACAGATTATTAACA  
>HPV107\_Beta\_126131393\_nt6154\_L1\_Tile|1  
TTTGTTCATAAGGTAAAGGACACTGAAAATACAAATAGCTATCAAAACAGTTCAACAGA  
>HPV107\_Beta\_126131393\_nt6159\_L1\_Tile|1  
TCAATAAGGTAAAGGACACTGAAAATACAAATAGCTATCAAAACAGTTCAACAGATGATA  
>HPV107\_Beta\_126131393\_nt6164\_L1\_Tile|1  
AAGGTAAAGGACACTGAAAATACAAATAGCTATCAAAACAGTTCAACAGATGATAGACAA  
>HPV107\_Beta\_126131393\_nt6274\_L1\_Tile|1  
ACCATGTTTATAGGGGAATATTGGGATAGGGCACTGCCATGCGATGATGCTGGTGACCAACA  
>HPV107\_Beta\_126131393\_nt6284\_L1\_Tile|1  
GGGGAATATTGGGATAGGGCACTGCCATGCGATGATGCTGGTGACCAACAAGGTAAATGT  
>HPV107\_Beta\_126131393\_nt6294\_L1\_Tile|1  
GGGATAGGGCACTGCCATGCGATGATGCTGGTGACCAACAAGGTAAATGTCCGCCCATTG  
>HPV107\_Beta\_126131393\_nt6299\_L1\_Tile|1  
AGGGCACTGCCATGCGATGATGCTGGTGACCAACAAGGTAAATGTCCGCCCATTGAATTA  
>HPV107\_Beta\_126131393\_nt6304\_L1\_Tile|1  
ACTGCCATGCGATGATGCTGGTGACCAACAAGGTAAATGTCCGCCCATTGAATTAAAAAA  
>HPV107\_Beta\_126131393\_nt6314\_L1\_Tile|1  
GATGATGCTGGTGACCAACAAGGTAAATGTCCGCCCATTGAATTAAAAAATCTTTTATA  
>HPV107\_Beta\_126131393\_nt6319\_L1\_Tile|1  
TGCTGGTGACCAACAAGGTAAATGTCCGCCCATTGAATTAAAAAATCTTTTATAGAAGA  
>HPV107\_Beta\_126131393\_nt6364\_L1\_Tile|1  
TTCTTTTATAGAAGATGGGGATATGATAGATATTGGGTTTGGCAATATAAATAACAAGAC  
>HPV107\_Beta\_126131393\_nt6374\_L1\_Tile|1  
GAAGATGGGGATATGATAGATATTGGGTTTGGCAATATAAATAACAAGACATTATCAGTA  
>HPV107\_Beta\_126131393\_nt6379\_L1\_Tile|1  
TGGGGATATGATAGATATTGGGTTTGGCAATATAAATAACAAGACATTATCAGTAAACAA  
>HPV107\_Beta\_126131393\_nt6384\_L1\_Tile|1  
ATATGATAGATATTGGGTTTGGCAATATAAATAACAAGACATTATCAGTAAACAAATCAG  
>HPV107\_Beta\_126131393\_nt6389\_L1\_Tile|1  
ATAGATATTGGGTTTGGCAATATAAATAACAAGACATTATCAGTAAACAAATCAGATGTT  
>HPV107\_Beta\_126131393\_nt6394\_L1\_Tile|1  
TATTGGGTTTGGCAATATAAATAACAAGACATTATCAGTAAACAAATCAGATGTTAGTTT  
>HPV107\_Beta\_126131393\_nt6399\_L1\_Tile|1  
GGTTTGGCAATATAAATAACAAGACATTATCAGTAAACAAATCAGATGTTAGTTTATAGATT  
>HPV107\_Beta\_126131393\_nt6404\_L1\_Tile|1  
GGCAATATAAATAACAAGACATTATCAGTAAACAAATCAGATGTTAGTTTATAGATTTAGTA  
>HPV107\_Beta\_126131393\_nt6409\_L1\_Tile|1  
TATAAATAACAAGACATTATCAGTAAACAAATCAGATGTTAGTTTATAGATTTAGTAAATGA  
>HPV107\_Beta\_126131393\_nt6559\_L1\_Tile|1  
TAGACATTATTTCACTAGAGGAGGAGCTGTGGGTGATGCTATACCTGATACAACAATAA  
>HPV107\_Beta\_126131393\_nt6564\_L1\_Tile|1

ATTATTTCACTAGAGGAGGAGCTGTGGGTGATGCTATACCTGATACAACAACCTAATCAAG  
>HPV107\_Beta\_126131393\_nt6579\_L1\_Tile|1  
GAGGAGCTGTGGGTGATGCTATACCTGATACAACAACCTAATCAAGATCACAATACTATA  
>HPV107\_Beta\_126131393\_nt6584\_L1\_Tile|1  
GCTGTGGGTGATGCTATACCTGATACAACAACCTAATCAAGATCACAATACTATATAGCA  
>HPV107\_Beta\_126131393\_nt6589\_L1\_Tile|1  
GGGTGATGCTATACCTGATACAACAACCTAATCAAGATCACAATACTATATAGCACCTAA  
>HPV107\_Beta\_126131393\_nt6594\_L1\_Tile|1  
ATGCTATACCTGATACAACAACCTAATCAAGATCACAATACTATATAGCACCTAAGAGTG  
>HPV107\_Beta\_126131393\_nt6599\_L1\_Tile|1  
ATACCTGATACAACAACCTAATCAAGATCACAATACTATATAGCACCTAAGAGTGGACAA  
>HPV107\_Beta\_126131393\_nt6609\_L1\_Tile|1  
CAACAACCTAATCAAGATCACAATACTATATAGCACCTAAGAGTGGACAATCCCAAAGTC  
>HPV107\_Beta\_126131393\_nt6614\_L1\_Tile|1  
ACTAATCAAGATCACAATACTATATAGCACCTAAGAGTGGACAATCCCAAAGTCCTTTG  
>HPV107\_Beta\_126131393\_nt6624\_L1\_Tile|1  
ATCACAATACTATATAGCACCTAAGAGTGGACAATCCCAAAGTCCTTTGGGTAATTCTA  
>HPV107\_Beta\_126131393\_nt6629\_L1\_Tile|1  
AAATACTATATAGCACCTAAGAGTGGACAATCCCAAAGTCCTTTGGGTAATTCTATTTAC  
>HPV107\_Beta\_126131393\_nt6634\_L1\_Tile|1  
CTATATAGCACCTAAGAGTGGACAATCCCAAAGTCCTTTGGGTAATTCTATTTACTATCC  
>HPV107\_Beta\_126131393\_nt6639\_L1\_Tile|1  
TAGCACCTAAGAGTGGACAATCCCAAAGTCCTTTGGGTAATTCTATTTACTATCCCACCG  
>HPV107\_Beta\_126131393\_nt6654\_L1\_Tile|1  
GACAATCCCAAAGTCCTTTGGGTAATTCTATTTACTATCCCACCGTTAGTGGCTCCTTAG  
>HPV107\_Beta\_126131393\_nt6659\_L1\_Tile|1  
TCCCAAAGTCCTTTGGGTAATTCTATTTACTATCCCACCGTTAGTGGCTCCTTAGTTTCT  
>HPV107\_Beta\_126131393\_nt6664\_L1\_Tile|1  
AAGTCCTTTGGGTAATTCTATTTACTATCCCACCGTTAGTGGCTCCTTAGTTTCTTCTGA  
>HPV107\_Beta\_126131393\_nt6669\_L1\_Tile|1  
CTTTGGGTAATTCTATTTACTATCCCACCGTTAGTGGCTCCTTAGTTTCTTCTGATGCAC  
>HPV107\_Beta\_126131393\_nt6699\_L1\_Tile|1  
TTAGTGGCTCCTTAGTTTCTTCTGATGCACAGCTCTTTAACAGACCCCTTCTGGTTGAAAC  
>HPV107\_Beta\_126131393\_nt6809\_L1\_Tile|1  
ACTGTTGCAGACAATACAAGGAACACCAATTTTACTATAAGTGTGCCTAGTCAAAATGGA  
>HPV107\_Beta\_126131393\_nt6839\_L1\_Tile|1  
TTTACTATAAGTGTGCCTAGTCAAAATGGACCCCTTACAGAATATGATGCCAATAATATC  
>HPV107\_Beta\_126131393\_nt6844\_L1\_Tile|1  
TATAAGTGTGCCTAGTCAAAATGGACCCCTTACAGAATATGATGCCAATAATATCAGGGA  
>HPV107\_Beta\_126131393\_nt6849\_L1\_Tile|1  
GTGTGCCTAGTCAAAATGGACCCCTTACAGAATATGATGCCAATAATATCAGGGAATTTT  
>HPV107\_Beta\_126131393\_nt6854\_L1\_Tile|1  
CCTAGTCAAAATGGACCCCTTACAGAATATGATGCCAATAATATCAGGGAATTTTAAAG  
>HPV107\_Beta\_126131393\_nt6879\_L1\_Tile|1  
AATATGATGCCAATAATATCAGGGAATTTTAAAGGCATGTTGAGGAATATCAAATATCTG  
>HPV107\_Beta\_126131393\_nt6884\_L1\_Tile|1  
GATGCCAATAATATCAGGGAATTTTAAAGGCATGTTGAGGAATATCAAATATCTGTAATA  
>HPV107\_Beta\_126131393\_nt6909\_L1\_Tile|1  
TAAGGCATGTTGAGGAATATCAAATATCTGTAATACTGCAACTTTGTAAAGTGTCTTTAC  
>HPV107\_Beta\_126131393\_nt6914\_L1\_Tile|1  
CATGTTGAGGAATATCAAATATCTGTAATACTGCAACTTTGTAAAGTGTCTTTACAACCA  
>HPV107\_Beta\_126131393\_nt6919\_L1\_Tile|1  
TGAGGAATATCAAATATCTGTAATACTGCAACTTTGTAAAGTGTCTTTACAACCAGATGT  
>HPV107\_Beta\_126131393\_nt6934\_L1\_Tile|1  
ATCTGTAATACTGCAACTTTGTAAAGTGTCTTTACAACCAGATGTGTTAGCCCAAATTAA

>HPV107\_Beta\_126131393\_nt6939\_L1\_Tile|1  
TAATACTGCAACTTTGTAAAGTGTCTTTACAACCAGATGTGTTAGCCCCAAATTAATGCTA  
>HPV107\_Beta\_126131393\_nt6944\_L1\_Tile|1  
CTGCAACTTTGTAAAGTGTCTTTACAACCAGATGTGTTAGCCCCAAATTAATGCTATGAAT  
>HPV107\_Beta\_126131393\_nt6954\_L1\_Tile|1  
GTAAAGTGTCTTTACAACCAGATGTGTTAGCCCCAAATTAATGCTATGAATTCAGGCATTT  
>HPV107\_Beta\_126131393\_nt6959\_L1\_Tile|1  
GTGTCTTTACAACCAGATGTGTTAGCCCCAAATTAATGCTATGAATTCAGGCATTTTGGAA  
>HPV107\_Beta\_126131393\_nt7124\_L1\_Tile|1  
GAAAAGGAAGATCCTTTTGTCTCAATACTTTTCTGGAGAGTTGATATGACAGAAAAATTA  
>HPV107\_Beta\_126131393\_nt7184\_L1\_Tile|1  
TCTTTGGATTTAGATCAGTATCCTTTAGGACGTAAATTCCTATTCCAAACAACACTACCT  
>HPV107\_Beta\_126131393\_nt7194\_L1\_Tile|1  
TAGATCAGTATCCTTTAGGACGTAAATTCCTATTCCAAACAACACTACCTGCCTCTCGAA  
>HPV107\_Beta\_126131393\_nt7199\_L1\_Tile|1  
CAGTATCCTTTAGGACGTAAATTCCTATTCCAAACAACACTACCTGCCTCTCGAAAACGT  
>HPV107\_Beta\_126131393\_nt7209\_L1\_Tile|1  
TAGGACGTAAATTCCTATTCCAAACAACACTACCTGCCTCTCGAAAACGTGCAGCGCCGA  
>HPV107\_Beta\_126131393\_nt7219\_L1\_Tile|1  
ATTCTATTCCAAACAACACTACCTGCCTCTCGAAAACGTGCAGCGCCGACCACCAAATC  
>HPV107\_Beta\_126131393\_nt7224\_L1\_Tile|1  
TATTCCAAACAACACTACCTGCCTCTCGAAAACGTGCAGCGCCGACCACCAAATCGGTTG  
>HPV107\_Beta\_126131393\_nt7253\_L1\_Tile|1  
AAACGTGCAGCGCCGACCACCAAATCGGTTGCAAAGCATAGCAAACGAAAACGTACTTGA  
>HPV11\_Alpha\_333026\_nt5892\_L1\_Tile|1  
CTCCTTGCTGTGGGACATCCATATTACTCTATCAAAAAAGTTAACAAAACAGTTGTACCA  
>HPV11\_Alpha\_333026\_nt5897\_L1\_Tile|1  
TGCTGTGGGACATCCATATTACTCTATCAAAAAAGTTAACAAAACAGTTGTACCAAAGGT  
>HPV11\_Alpha\_333026\_nt5902\_L1\_Tile|2  
TGGGACATCCATATTACTCTATCAAAAAAGTTAACAAAACAGTTGTACCAAAGGTGTCTG  
>HPV11\_Alpha\_333026\_nt6002\_L1\_Tile|2  
TAACAAGTTTGCATTACCTGATTCATCCCTGTTTGACCCCACTACACAGCGTTTAGTATG  
>HPV11\_Alpha\_333026\_nt6117\_L1\_Tile|1  
GGGCATCCATTGCTAAACAAATATGATGATGTAGAAAATAGTGGTGGGTATGGTGGTAAT  
>HPV11\_Alpha\_333026\_nt6272\_L1\_Tile|1  
TAAGGGTACACAATGTTCAAATACCTCTGTACAAAATGGTGACTGCCCCCGTTGGAAC  
>HPV11\_Alpha\_333026\_nt6277\_L1\_Tile|1  
GTACACAATGTTCAAATACCTCTGTACAAAATGGTGACTGCCCCCGTTGGAAC TTATTA  
>HPV11\_Alpha\_333026\_nt6392\_L1\_Tile|1  
TGCAGACTTACAAACCAATAAATCGGATGTTCCCTTGATATTTGTGGAACGTCTGCAA  
>HPV11\_Alpha\_333026\_nt6547\_L1\_Tile|1  
ATAGGGCCGGTACTGTGGGGGAACCTGTGCCTGATGACCTGTTGGTAAAAGGGGGTAATA  
>HPV11\_Alpha\_333026\_nt6557\_L1\_Tile|1  
TACTGTGGGGGAACCTGTGCCTGATGACCTGTTGGTAAAAGGGGGTAATAACAGATCATC  
>HPV11\_Alpha\_333026\_nt6572\_L1\_Tile|1  
TGTGCCTGATGACCTGTTGGTAAAAGGGGGTAATAACAGATCATCTGTAGCTAGTAGTAT  
>HPV11\_Alpha\_333026\_nt6577\_L1\_Tile|1  
CTGATGACCTGTTGGTAAAAGGGGGTAATAACAGATCATCTGTAGCTAGTAGTATTTATG  
>HPV11\_Alpha\_333026\_nt6582\_L1\_Tile|2  
GACCTGTTGGTAAAAGGGGGTAATAACAGATCATCTGTAGCTAGTAGTATTTATGTACAT  
>HPV11\_Alpha\_333026\_nt6592\_L1\_Tile|1  
TAAAAGGGGGTAATAACAGATCATCTGTAGCTAGTAGTATTTATGTACATACACCTAGTG  
>HPV11\_Alpha\_333026\_nt6607\_L1\_Tile|1  
ACAGATCATCTGTAGCTAGTAGTATTTATGTACATACACCTAGTGGCTCATTTGGTGTCTT  
>HPV11\_Alpha\_333026\_nt6622\_L1\_Tile|2

CTAGTAGTATTTATGTACATACACCTAGTGGCTCATTGGTGTCTTCAGAGGCTCAATTAT  
>HPV11\_Alpha\_333026\_nt6777\_L1\_Tile|1  
AGTACAAATATGACACTATGTGCATCTGTGTCTAAATCTGCTACATACACTAATTCAGAT  
>HPV11\_Alpha\_333026\_nt6782\_L1\_Tile|2  
AAATATGACACTATGTGCATCTGTGTCTAAATCTGCTACATACACTAATTCAGATTATAA  
>HPV11\_Alpha\_333026\_nt6787\_L1\_Tile|1  
TGACACTATGTGCATCTGTGTCTAAATCTGCTACATACACTAATTCAGATTATAAGGAAT  
>HPV11\_Alpha\_333026\_nt6792\_L1\_Tile|1  
CTATGTGCATCTGTGTCTAAATCTGCTACATACACTAATTCAGATTATAAGGAATACATG  
>HPV11\_Alpha\_333026\_nt6797\_L1\_Tile|1  
TGCATCTGTGTCTAAATCTGCTACATACACTAATTCAGATTATAAGGAATACATGCGCCA  
>HPV11\_Alpha\_333026\_nt7142\_L1\_Tile|2  
GTTTCCCCTTGGACGTAAGTTTTTATTGCAAAGTGGATATCGAGGACGGACGTCTGCTCG  
>HPV11\_Alpha\_333026\_nt7182\_L1\_Tile|2  
CGAGGACGGACGTCTGCTCGTACAGGTATAAAGCGCCAGCTGTGTCTAAGCCCTCTACA  
>HPV11\_Alpha\_333026\_nt7197\_L1\_Tile|1  
GCTCGTACAGGTATAAAGCGCCAGCTGTGTCTAAGCCCTCTACAGCCCCCAAACGAAAA  
>HPV11\_Alpha\_333026\_nt7207\_L1\_Tile|1  
GTATAAAGCGCCAGCTGTGTCTAAGCCCTCTACAGCCCCCAAACGAAAAACGTACCAAAA  
>HPV110\_Beta\_186461194\_nt5847\_L1\_Tile|1  
TGGCGCAAAAATAGAAGTCCCTAAGGTATCAGGAAATCAATACAGAGCATTCCGGGTGCA  
>HPV110\_Beta\_186461194\_nt6062\_L1\_Tile|2  
ATACTGAAAATTCTAGCAATTATCAAGCAGGCTCTACTGATGACAGGCAGAATACTTCAT  
>HPV110\_Beta\_186461194\_nt6167\_L1\_Tile|1  
GTATGGGAGAGCATTGGGACAAAGCTCCTGTTTGTGAATCAGAAGCAGGTAATCAGTTAG  
>HPV110\_Beta\_186461194\_nt6172\_L1\_Tile|1  
GGAGAGCATTGGGACAAAGCTCCTGTTTGTGAATCAGAAGCAGGTAATCAGTTAGGTTTA  
>HPV110\_Beta\_186461194\_nt6482\_L1\_Tile|2  
GGGATGCAATACCTGATGGTGCAGTGAATCAAAATCATAACTATTTCTTGCCAGCAAAGC  
>HPV110\_Beta\_186461194\_nt6487\_L1\_Tile|1  
GCAATACCTGATGGTGCAGTGAATCAAAATCATAACTATTTCTTGCCAGCAAAGCAAGAT  
>HPV110\_Beta\_186461194\_nt6507\_L1\_Tile|1  
GAATCAAAATCATAACTATTTCTTGCCAGCAAAGCAAGATCAACAACAACGCACACTAGC  
>HPV110\_Beta\_186461194\_nt6512\_L1\_Tile|1  
AAAATCATAACTATTTCTTGCCAGCAAAGCAAGATCAACAACAACGCACACTAGCAAAC  
>HPV110\_Beta\_186461194\_nt6517\_L1\_Tile|1  
CATAACTATTTCTTGCCAGCAAAGCAAGATCAACAACAACGCACACTAGCAAACCTCTACA  
>HPV110\_Beta\_186461194\_nt6532\_L1\_Tile|1  
CCAGCAAAGCAAGATCAACAACAACGCACACTAGCAAACCTCTACATATTTTCCAACAGTA  
>HPV110\_Beta\_186461194\_nt6537\_L1\_Tile|1  
AAAGCAAGATCAACAACAACGCACACTAGCAAACCTCTACATATTTTCCAACAGTAAGTGG  
>HPV110\_Beta\_186461194\_nt6557\_L1\_Tile|1  
GCACACTAGCAAACCTCTACATATTTTCCAACAGTAAGTGGTTCTCTAGTTACTTCAGATG  
>HPV110\_Beta\_186461194\_nt6697\_L1\_Tile|1  
ATAACTGTTGCTGATAATACTCGTAATACTAATTTTTCAATTAGTGTTACTACAGAAGCT  
>HPV110\_Beta\_186461194\_nt6702\_L1\_Tile|2  
TGTTGCTGATAATACTCGTAATACTAATTTTTCAATTAGTGTTACTACAGAAGCTGGAGC  
>HPV110\_Beta\_186461194\_nt6707\_L1\_Tile|1  
CTGATAATACTCGTAATACTAATTTTTCAATTAGTGTTACTACAGAAGCTGGAGCAACTG  
>HPV110\_Beta\_186461194\_nt6712\_L1\_Tile|1  
AATACTCGTAATACTAATTTTTCAATTAGTGTTACTACAGAAGCTGGAGCAACTGAATAC  
>HPV110\_Beta\_186461194\_nt6717\_L1\_Tile|1  
TCGTAATACTAATTTTTCAATTAGTGTTACTACAGAAGCTGGAGCAACTGAATACAATTC  
>HPV110\_Beta\_186461194\_nt6722\_L1\_Tile|2  
ATACTAATTTTTCAATTAGTGTTACTACAGAAGCTGGAGCAACTGAATACAATTCACAAA



>HPV110\_Beta\_186461194\_nt6727\_L1\_Tile|1  
AATTTTTCAATTAGTGTACTACAGAAGCTGGAGCAACTGAATACAATTCACAAAATATA  
>HPV110\_Beta\_186461194\_nt6732\_L1\_Tile|1  
TTCAATTAGTGTACTACAGAAGCTGGAGCAACTGAATACAATTCACAAAATATAAGAGA  
>HPV110\_Beta\_186461194\_nt6742\_L1\_Tile|2  
GTTACTACAGAAGCTGGAGCAACTGAATACAATTCACAAAATATAAGAGAATTTCTTTAGA  
>HPV110\_Beta\_186461194\_nt6752\_L1\_Tile|1  
AAGCTGGAGCAACTGAATACAATTCACAAAATATAAGAGAATTTCTTTAGACATGTAGAGG  
>HPV110\_Beta\_186461194\_nt6772\_L1\_Tile|1  
AATTCACAAAATATAAGAGAATTTCTTTAGACATGTAGAGGAATATCAACTTTCTTTAATA  
>HPV110\_Beta\_186461194\_nt6777\_L1\_Tile|1  
ACAAAATATAAGAGAATTTCTTTAGACATGTAGAGGAATATCAACTTTCTTTAATACTGCA  
>HPV110\_Beta\_186461194\_nt6782\_L1\_Tile|2  
ATATAAGAGAATTTCTTTAGACATGTAGAGGAATATCAACTTTCTTTAATACTGCAATTAT  
>HPV110\_Beta\_186461194\_nt6792\_L1\_Tile|1  
ATTTCTTAGACATGTAGAGGAATATCAACTTTCTTTAATACTGCAATTATGTAAGGTACC  
>HPV110\_Beta\_186461194\_nt6802\_L1\_Tile|2  
CATGTAGAGGAATATCAACTTTCTTTAATACTGCAATTATGTAAGGTACCCTTAAAAGCA  
>HPV110\_Beta\_186461194\_nt6807\_L1\_Tile|1  
AGAGGAATATCAACTTTCTTTAATACTGCAATTATGTAAGGTACCCTTAAAAGCAGAGGT  
>HPV110\_Beta\_186461194\_nt6812\_L1\_Tile|1  
AATATCAACTTTCTTTAATACTGCAATTATGTAAGGTACCCTTAAAAGCAGAGGTTTTAA  
>HPV110\_Beta\_186461194\_nt6817\_L1\_Tile|1  
CAACTTTCTTTAATACTGCAATTATGTAAGGTACCCTTAAAAGCAGAGGTTTTAACACAA  
>HPV110\_Beta\_186461194\_nt6822\_L1\_Tile|2  
TTCTTTAATACTGCAATTATGTAAGGTACCCTTAAAAGCAGAGGTTTTAACACAAATTAA  
>HPV110\_Beta\_186461194\_nt7107\_L1\_Tile|1  
ATTTTTATTTCAGGCTGGTTTACAAAGTCGACCTCGCTCTGTAAGGACATCTGTTAAGGT  
>HPV110\_Beta\_186461194\_nt7112\_L1\_Tile|1  
TATTTTCAGGCTGGTTTACAAAGTCGACCTCGCTCTGTAAGGACATCTGTTAAGGTCTCTA  
>HPV110\_Beta\_186461194\_nt7117\_L1\_Tile|1  
CAGGCTGGTTTACAAAGTCGACCTCGCTCTGTAAGGACATCTGTTAAGGTCTCTAAGGGT  
>HPV110\_Beta\_186461194\_nt7127\_L1\_Tile|1  
TACAAAGTCGACCTCGCTCTGTAAGGACATCTGTTAAGGTCTCTAAGGGTACCAAACGCA  
>HPV110\_Beta\_186461194\_nt7137\_L1\_Tile|1  
ACCTCGCTCTGTAAGGACATCTGTTAAGGTCTCTAAGGGTACCAAACGCAAACGGTCGTG  
>HPV110\_Beta\_186461194\_nt7138\_L1\_Tile|1  
CCTCGCTCTGTAAGGACATCTGTTAAGGTCTCTAAGGGTACCAAACGCAAACGGTCGTGA  
>HPV111\_Beta\_186461202\_nt5988\_L1\_Tile|1  
ATTATTTAATAAGGTTCTGTGACACTGAAAATTCAGTAATTATCAAGCTGTGACACAAGA  
>HPV111\_Beta\_186461202\_nt5993\_L1\_Tile|1  
TTAATAAGGTTCTGTGACACTGAAAATTCAGTAATTATCAAGCTGTGACACAAGATGATA  
>HPV111\_Beta\_186461202\_nt6128\_L1\_Tile|1  
GGGACAAAAGCAAAACCCTGTGATGATGCAGGAAACCAGCAAGGCTTATGCCCCCAATTG  
>HPV111\_Beta\_186461202\_nt6133\_L1\_Tile|1  
AAAGCAAAACCCTGTGATGATGCAGGAAACCAGCAAGGCTTATGCCCCCAATTGAATTA  
>HPV111\_Beta\_186461202\_nt6138\_L1\_Tile|1  
AAAACCCTGTGATGATGCAGGAAACCAGCAAGGCTTATGCCCCCAATTGAATTAAAGAA  
>HPV111\_Beta\_186461202\_nt6148\_L1\_Tile|1  
GATGATGCAGGAAACCAGCAAGGCTTATGCCCCCAATTGAATTAAAGAATTCTGTAATA  
>HPV111\_Beta\_186461202\_nt6158\_L1\_Tile|1  
GAAACCAGCAAGGCTTATGCCCCCAATTGAATTAAAGAATTCTGTAATAGAGGATGGAG  
>HPV111\_Beta\_186461202\_nt6168\_L1\_Tile|1  
AGGCTTATGCCCCCAATTGAATTAAAGAATTCTGTAATAGAGGATGGAGACATGTTTGA  
>HPV111\_Beta\_186461202\_nt6288\_L1\_Tile|1

AGATATTGTCAATGAAGTATGTAAATACCCTGACTTCCTAACTATGGCTAATGACGTCTA  
>HPV111\_Beta\_186461202\_nt6293\_L1\_Tile|1  
TTGTCAATGAAGTATGTAAATACCCTGACTTCCTAACTATGGCTAATGACGTCTATGGGG  
>HPV111\_Beta\_186461202\_nt6418\_L1\_Tile|1  
AATGTAGGAGATGCAATTCCAGATGCAGCAGTGCACAACAAATCACAATTATTATCTGCCA  
>HPV111\_Beta\_186461202\_nt6423\_L1\_Tile|1  
AGGAGATGCAATTCCAGATGCAGCAGTGCACAACAAATCACAATTATTATCTGCCAGCACA  
>HPV111\_Beta\_186461202\_nt6433\_L1\_Tile|1  
ATTCCAGATGCAGCAGTGCACAACAAATCACAATTATTATCTGCCAGCACAGGGTAATCAA  
>HPV111\_Beta\_186461202\_nt6448\_L1\_Tile|1  
GTGCAACAAATCACAATTATTATCTGCCAGCACAGGGTAATCAACAACAAACATTTTG  
>HPV111\_Beta\_186461202\_nt6453\_L1\_Tile|1  
ACAAATCACAATTATTATCTGCCAGCACAGGGTAATCAACAACAAACATTTTGGGTAA  
>HPV111\_Beta\_186461202\_nt6458\_L1\_Tile|1  
ATCACAATTATTATCTGCCAGCACAGGGTAATCAACAACAAACATTTTGGGTAACTCCA  
>HPV111\_Beta\_186461202\_nt6463\_L1\_Tile|1  
AATTATTATCTGCCAGCACAGGGTAATCAACAACAAACATTTTGGGTAACTCCATTTAT  
>HPV111\_Beta\_186461202\_nt6468\_L1\_Tile|1  
TTATCTGCCAGCACAGGGTAATCAACAACAAACATTTTGGGTAACTCCATTTATTATCC  
>HPV111\_Beta\_186461202\_nt6478\_L1\_Tile|1  
GCACAGGGTAATCAACAACAAACATTTTGGGTAACTCCATTTATTATCCTACTGTTAGT  
>HPV111\_Beta\_186461202\_nt6493\_L1\_Tile|1  
CAACAACAAACATTTTGGGTAACTCCATTTATTATCCTACTGTTAGTGGTTCTCTTGTACT  
>HPV111\_Beta\_186461202\_nt6633\_L1\_Tile|1  
AATGTTTATAACAGTAGCAGATAATACCAGAAACACTAATTTTACTATAAGCGTATCCAC  
>HPV111\_Beta\_186461202\_nt6638\_L1\_Tile|1  
TTATAACAGTAGCAGATAATACCAGAAACACTAATTTTACTATAAGCGTATCCACAGAAG  
>HPV111\_Beta\_186461202\_nt6643\_L1\_Tile|1  
ACAGTAGCAGATAATACCAGAAACACTAATTTTACTATAAGCGTATCCACAGAAGCTAAT  
>HPV111\_Beta\_186461202\_nt6648\_L1\_Tile|1  
AGCAGATAATACCAGAAACACTAATTTTACTATAAGCGTATCCACAGAAGCTAATGCACA  
>HPV111\_Beta\_186461202\_nt6658\_L1\_Tile|1  
ACCAGAAACACTAATTTTACTATAAGCGTATCCACAGAAGCTAATGCACAGCAATATAAT  
>HPV111\_Beta\_186461202\_nt6663\_L1\_Tile|1  
AAACACTAATTTTACTATAAGCGTATCCACAGAAGCTAATGCACAGCAATATAATGCTAG  
>HPV111\_Beta\_186461202\_nt6668\_L1\_Tile|1  
CTAATTTTACTATAAGCGTATCCACAGAAGCTAATGCACAGCAATATAATGCTAGTAATA  
>HPV111\_Beta\_186461202\_nt6673\_L1\_Tile|1  
TTTACTATAAGCGTATCCACAGAAGCTAATGCACAGCAATATAATGCTAGTAATATTAGA  
>HPV111\_Beta\_186461202\_nt6678\_L1\_Tile|1  
TATAAGCGTATCCACAGAAGCTAATGCACAGCAATATAATGCTAGTAATATTAGAGAATA  
>HPV111\_Beta\_186461202\_nt6748\_L1\_Tile|1  
GTAGAAGAATATCAATTGTCTTTGATTCTTCAACTATGTAAAGTTTCTTTAGTTCCAGAA  
>HPV111\_Beta\_186461202\_nt6753\_L1\_Tile|1  
AGAATATCAATTGTCTTTGATTCTTCAACTATGTAAAGTTTCTTTAGTTCCAGAAGTTTT  
>HPV111\_Beta\_186461202\_nt6763\_L1\_Tile|1  
TTGTCTTTGATTCTTCAACTATGTAAAGTTTCTTTAGTTCCAGAAGTTTTATCTCAAATC  
>HPV111\_Beta\_186461202\_nt6768\_L1\_Tile|1  
TTTGATTCTTCAACTATGTAAAGTTTCTTTAGTTCCAGAAGTTTTATCTCAAATCAATGC  
>HPV111\_Beta\_186461202\_nt7053\_L1\_Tile|1  
TTTATTCCAGGCTGGTTTACAAACACGAAAACGGACTTTAAACCTTCGTCTGTGAAATC  
>HPV111\_Beta\_186461202\_nt7058\_L1\_Tile|1  
TCCAGGCTGGTTTACAAACACGAAAACGGACTTTAAACCTTCGTCTGTGAAATCTACTA  
>HPV111\_Beta\_186461202\_nt7063\_L1\_Tile|1  
GCTGGTTTACAAACACGAAAACGGACTTTAAACCTTCGTCTGTGAAATCTACTAAATCT

>HPV111\_Beta\_186461202\_nt7068\_L1\_Tile|1  
TTTACAAACACGAAAACGGACTTTAAAACCTTCGTCTGTGAAATCTACTAAATCTGCAAA  
>HPV111\_Beta\_186461202\_nt7083\_L1\_Tile|1  
ACGGACTTTAAAACCTTCGTCTGTGAAATCTACTAAATCTGCAAAACGCAGACGCACCTA  
>HPV111\_Beta\_186461202\_nt7084\_L1\_Tile|1  
CGGACTTTAAAACCTTCGTCTGTGAAATCTACTAAATCTGCAAAACGCAGACGCACCTAA  
>HPV12\_Beta\_396910\_nt6165\_L1\_Tile|1  
AATAAGTAGGGGTCAGCCTTTAGGCGTTGGAAGTACTGGACATCCCTATTTTAACAAAAT  
>HPV12\_Beta\_396910\_nt6205\_L1\_Tile|1  
CATCCCTATTTTAACAAAATTAAAGACACGGAAAACCTCAAATAACTATGCCACAGGCAGT  
>HPV12\_Beta\_396910\_nt6220\_L1\_Tile|1  
AAAATTAAAAGACACGGAAAACCTCAAATAACTATGCCACAGGCAGTAAGGATGATAGACAG  
>HPV12\_Beta\_396910\_nt6235\_L1\_Tile|1  
GAAAACCTCAAATAACTATGCCACAGGCAGTAAGGATGATAGACAGAACACATCATTGAT  
>HPV12\_Beta\_396910\_nt6330\_L1\_Tile|1  
ACCTTGTGTGGGAGAACACTGGGAGAAAGCCTTACCCTGCGGGGATGCACCAGCTGAAAA  
>HPV12\_Beta\_396910\_nt6335\_L1\_Tile|1  
GTGTGGGAGAACACTGGGAGAAAGCCTTACCCTGCGGGGATGCACCAGCTGAAAATGGTG  
>HPV12\_Beta\_396910\_nt6340\_L1\_Tile|1  
GGAGAACACTGGGAGAAAGCCTTACCCTGCGGGGATGCACCAGCTGAAAATGGTGTGTTGC  
>HPV12\_Beta\_396910\_nt6350\_L1\_Tile|1  
GGGAGAAAGCCTTACCCTGCGGGGATGCACCAGCTGAAAATGGTGTGTTGCCCTCCCATAG  
>HPV12\_Beta\_396910\_nt6355\_L1\_Tile|1  
AAAGCCTTACCCTGCGGGGATGCACCAGCTGAAAATGGTGTGTTGCCCTCCCATAGAGTTA  
>HPV12\_Beta\_396910\_nt6375\_L1\_Tile|1  
TGCACCAGCTGAAAATGGTGTGTTGCCCTCCCATAGAGTTAAAGAACACTTTCATTGAAGA  
>HPV12\_Beta\_396910\_nt6380\_L1\_Tile|1  
CAGCTGAAAATGGTGTGTTGCCCTCCCATAGAGTTAAAGAACACTTTCATTGAAGATGGTG  
>HPV12\_Beta\_396910\_nt6895\_L1\_Tile|1  
AACACCAATTTACGTATATCTATTTACAGTGATAATCAAAATGTACACGACATTCCAAAT  
>HPV12\_Beta\_396910\_nt6900\_L1\_Tile|1  
CAATTTACGTATATCTATTTACAGTGATAATCAAAATGTACACGACATTCCAAATTATGA  
>HPV12\_Beta\_396910\_nt6905\_L1\_Tile|1  
TCAGTATATCTATTTACAGTGATAATCAAAATGTACACGACATTCCAAATTATGATTCTC  
>HPV12\_Beta\_396910\_nt6910\_L1\_Tile|1  
ATATCTATTTACAGTGATAATCAAAATGTACACGACATTCCAAATTATGATTCTCAAAAA  
>HPV12\_Beta\_396910\_nt6915\_L1\_Tile|1  
TATTTACAGTGATAATCAAAATGTACACGACATTCCAAATTATGATTCTCAAAAAATTTAG  
>HPV12\_Beta\_396910\_nt6920\_L1\_Tile|1  
ACAGTGATAATCAAAATGTACACGACATTCCAAATTATGATTCTCAAAAAATTTAGAGAAT  
>HPV12\_Beta\_396910\_nt6925\_L1\_Tile|1  
GATAATCAAAATGTACACGACATTCCAAATTATGATTCTCAAAAAATTTAGAGAATATTTA  
>HPV12\_Beta\_396910\_nt7075\_L1\_Tile|1  
AACTCTTCTTTGCTGGAGGACTGGCAATTAGGCTTCGTGCCAACTCCTGACAATCCTATT  
>HPV12\_Beta\_396910\_nt7100\_L1\_Tile|1  
AATTAGGCTTCGTGCCAACTCCTGACAATCCTATTTCATGACACATACAGATATATCGAAT  
>HPV12\_Beta\_396910\_nt7105\_L1\_Tile|1  
GGCTTCGTGCCAACTCCTGACAATCCTATTTCATGACACATACAGATATATCGAATCTCTG  
>HPV12\_Beta\_396910\_nt7200\_L1\_Tile|1  
AAAGCCGGACCCTTATGATGGCTTAAGTTTTTGGACTGTAGATATGACTGAGAGACTTTC  
>HPV12\_Beta\_396910\_nt7205\_L1\_Tile|1  
CGGACCCTTATGATGGCTTAAGTTTTTGGACTGTAGATATGACTGAGAGACTTTCCTTTAG  
>HPV12\_Beta\_396910\_nt7230\_L1\_Tile|1  
TTGGACTGTAGATATGACTGAGAGACTTTCCTTTAGACCTGGATCAGTATTCCTTAGGGCG  
>HPV12\_Beta\_396910\_nt7260\_L1\_Tile|1

TTTAGACCTGGATCAGTATTCTTAGGGCGCAAGTTCTTATTCCAGGCTGGCCTCCAACA  
>HPV12\_Beta\_396910\_nt7325\_L1\_Tile|1  
CCGTTAACGGTACAACAAAATCATCAAGCTATAGAAGTTCCATAAGGGGGACCAAAAGAA  
>HPV13\_Alpha\_85827580\_nt5873\_L1\_Tile|1  
TGGGAAATCCTTATTTTCTATTAAAGAAACAAAACAAAACCTGTTGTCCCTAAGGTATCTG  
>HPV13\_Alpha\_85827580\_nt5878\_L1\_Tile|1  
AATCCTTATTTTCTATTAAAGAAACAAAACAAAACCTGTTGTCCCTAAGGTATCTGGTTAT  
>HPV13\_Alpha\_85827580\_nt5883\_L1\_Tile|1  
TTATTTTCTTATTAAGAAACAAAACAAAACCTGTTGTCCCTAAGGTATCTGGTTATCAGTT  
>HPV13\_Alpha\_85827580\_nt5888\_L1\_Tile|1  
TTCCTATTAAGAAACAAAACAAAACCTGTTGTCCCTAAGGTATCTGGTTATCAGTTTAGGG  
>HPV13\_Alpha\_85827580\_nt5893\_L1\_Tile|1  
ATTAAGAAACAAAACAAAACCTGTTGTCCCTAAGGTATCTGGTTATCAGTTTAGGGTATTT  
>HPV13\_Alpha\_85827580\_nt6253\_L1\_Tile|1  
CAATGTACTGGTGTAATGTACAACCTGGAGATTGCCCTCCTTTAGAATTAATTAGTAGT  
>HPV13\_Alpha\_85827580\_nt6503\_L1\_Tile|1  
CAAGGCATTTCTTTAACAGGGCAGGCTCTGTTGGTGAACCTAATCCCAGCAGAATTATATG  
>HPV13\_Alpha\_85827580\_nt6508\_L1\_Tile|1  
CATTTCTTTAACAGGGCAGGCTCTGTTGGTGAACCTAATCCCAGCAGAATTATATGTTAAG  
>HPV13\_Alpha\_85827580\_nt6513\_L1\_Tile|1  
CTTTAACAGGGCAGGCTCTGTTGGTGAACCTAATCCCAGCAGAATTATATGTTAAGGGTAG  
>HPV13\_Alpha\_85827580\_nt6523\_L1\_Tile|1  
GCAGGCTCTGTTGGTGAACCTAATCCCAGCAGAATTATATGTTAAGGGTAGTAATACACTT  
>HPV13\_Alpha\_85827580\_nt6528\_L1\_Tile|1  
CTCTGTTGGTGAACCTAATCCCAGCAGAATTATATGTTAAGGGTAGTAATACACTTTCTAA  
>HPV13\_Alpha\_85827580\_nt6533\_L1\_Tile|1  
TTGGTGAACCTAATCCCAGCAGAATTATATGTTAAGGGTAGTAATACACTTTCTAATAGTA  
>HPV13\_Alpha\_85827580\_nt6538\_L1\_Tile|1  
GAACCTAATCCCAGCAGAATTATATGTTAAGGGTAGTAATACACTTTCTAATAGTATTTAC  
>HPV13\_Alpha\_85827580\_nt6543\_L1\_Tile|1  
AATCCCAGCAGAATTATATGTTAAGGGTAGTAATACACTTTCTAATAGTATTTACTATAA  
>HPV13\_Alpha\_85827580\_nt6548\_L1\_Tile|1  
CAGCAGAATTATATGTTAAGGGTAGTAATACACTTTCTAATAGTATTTACTATAAATACTC  
>HPV13\_Alpha\_85827580\_nt6553\_L1\_Tile|1  
GAATTATATGTTAAGGGTAGTAATACACTTTCTAATAGTATTTACTATAAATACTCCCAGT  
>HPV13\_Alpha\_85827580\_nt6558\_L1\_Tile|1  
ATATGTTAAGGGTAGTAATACACTTTCTAATAGTATTTACTATAAATACTCCCAGTGGCTC  
>HPV13\_Alpha\_85827580\_nt6563\_L1\_Tile|1  
TTAAGGGTAGTAATACACTTTCTAATAGTATTTACTATAAATACTCCCAGTGGCTCTCTTG  
>HPV13\_Alpha\_85827580\_nt6743\_L1\_Tile|1  
CTAACATGACTGTGTGTGCAGCCACTACATCATCTCTTTCAGACACATATAAGGCCACAG  
>HPV13\_Alpha\_85827580\_nt6748\_L1\_Tile|1  
ATGACTGTGTGTGCAGCCACTACATCATCTCTTTCAGACACATATAAGGCCACAGAATAT  
>HPV13\_Alpha\_85827580\_nt6753\_L1\_Tile|1  
TGTGTGTGCAGCCACTACATCATCTCTTTCAGACACATATAAGGCCACAGAATATAAACA  
>HPV13\_Alpha\_85827580\_nt6763\_L1\_Tile|1  
GCCACTACATCATCTCTTTCAGACACATATAAGGCCACAGAATATAAACAGTACATGCGA  
>HPV13\_Alpha\_85827580\_nt6913\_L1\_Tile|1  
CCTACAATTCTAGAAGACTGGAACCTTGGGCTATCTCCCCCTCCTAATGGAACATTGGAA  
>HPV13\_Alpha\_85827580\_nt6928\_L1\_Tile|1  
GACTGGAACCTTGGGCTATCTCCCCCTCCTAATGGAACATTGGAAGACACATATAGATAT  
>HPV13\_Alpha\_85827580\_nt6933\_L1\_Tile|1  
GAACTTTGGGCTATCTCCCCCTCCTAATGGAACATTGGAAGACACATATAGATATGTACA  
>HPV13\_Alpha\_85827580\_nt6938\_L1\_Tile|1  
TTGGGCTATCTCCCCCTCCTAATGGAACATTGGAAGACACATATAGATATGTACAATCTC

>HPV13\_Alpha\_85827580\_nt6943\_L1\_Tile|1  
CTATCTCCCCCTCCTAATGGAACATTGGAAGACACATATAGATATGTACAATCTCAGGCC  
>HPV13\_Alpha\_85827580\_nt6953\_L1\_Tile|1  
CTCCTAATGGAACATTGGAAGACACATATAGATATGTACAATCTCAGGCCATAACGTGTC  
>HPV13\_Alpha\_85827580\_nt7003\_L1\_Tile|1  
ATAACGTGTCAAAAGCCTACACCTGATAAAGAAAAACAGGATCCGTATGCGGGTCTTAGT  
>HPV13\_Alpha\_85827580\_nt7133\_L1\_Tile|1  
TATTACAAACAGGCGTTCAGTCTAGGTCACCTATTCGTGTAGGTAGAAAACGTGCTGCAT  
>HPV13\_Alpha\_85827580\_nt7138\_L1\_Tile|1  
CAAACAGGCGTTCAGTCTAGGTCACCTATTCGTGTAGGTAGAAAACGTGCTGCATCTACA  
>HPV13\_Alpha\_85827580\_nt7143\_L1\_Tile|1  
AGGCGTTCAGTCTAGGTCACCTATTCGTGTAGGTAGAAAACGTGCTGCATCTACATCTAC  
>HPV13\_Alpha\_85827580\_nt7153\_L1\_Tile|1  
TCTAGGTCACCTATTCGTGTAGGTAGAAAACGTGCTGCATCTACATCTACTGCCACACCT  
>HPV13\_Alpha\_85827580\_nt7163\_L1\_Tile|1  
CTATTCGTGTAGGTAGAAAACGTGCTGCATCTACATCTACTGCCACACCTACTACACGTA  
>HPV13\_Alpha\_85827580\_nt7168\_L1\_Tile|1  
CGTGTAGGTAGAAAACGTGCTGCATCTACATCTACTGCCACACCTACTACACGTAAAAAA  
>HPV13\_Alpha\_85827580\_nt7173\_L1\_Tile|1  
AGGTAGAAAACGTGCTGCATCTACATCTACTGCCACACCTACTACACGTAAAAAAGCTAA  
>HPV13\_Alpha\_85827580\_nt7178\_L1\_Tile|1  
GAAAACGTGCTGCATCTACATCTACTGCCACACCTACTACAGTAAAAAAGCTAAAAGGA  
>HPV13\_Alpha\_85827580\_nt7183\_L1\_Tile|1  
CGTGTGCATCTACATCTACTGCCACACCTACTACAGTAAAAAAGCTAAAAGGAAATAA  
>HPV14D\_Beta\_396918\_nt5969\_L1\_Tile|1  
ATTATTTAATAAGGTTGGTGATACAGAAAATCCCAACTCATACAGGCAACAAGCTAACTC  
>HPV14D\_Beta\_396918\_nt5974\_L1\_Tile|1  
TTAATAAGGTTGGTGATACAGAAAATCCCAACTCATACAGGCAACAAGCTAACTCCACTG  
>HPV14D\_Beta\_396918\_nt5979\_L1\_Tile|1  
AAGGTTGGTGATACAGAAAATCCCAACTCATACAGGCAACAAGCTAACTCCACTGATGAC  
>HPV14D\_Beta\_396918\_nt5984\_L1\_Tile|1  
TGGTGATACAGAAAATCCCAACTCATACAGGCAACAAGCTAACTCCACTGATGACAGACA  
>HPV14D\_Beta\_396918\_nt5989\_L1\_Tile|1  
ATACAGAAAATCCCAACTCATACAGGCAACAAGCTAACTCCACTGATGACAGACAAAATG  
>HPV14D\_Beta\_396918\_nt5994\_L1\_Tile|1  
GAAAATCCCAACTCATACAGGCAACAAGCTAACTCCACTGATGACAGACAAAATGTGTCA  
>HPV14D\_Beta\_396918\_nt5999\_L1\_Tile|1  
TCCCAACTCATACAGGCAACAAGCTAACTCCACTGATGACAGACAAAATGTGTCAATTTGA  
>HPV14D\_Beta\_396918\_nt6649\_L1\_Tile|1  
ACAACACACGTAACACAAATTTTAGTATATCAGTTAGTTTCAGAAAACACTGAGGTATCCA  
>HPV14D\_Beta\_396918\_nt6669\_L1\_Tile|1  
TTTAGTATATCAGTTAGTTTCAGAAAACACTGAGGTATCCAAAATTGACAATTATACCTCT  
>HPV14D\_Beta\_396918\_nt7099\_L1\_Tile|1  
GTACAAAAACAGTTTTCGACTAGGGGATCCATCAAGGGTATTAAACGAAAACGCAAGAATT  
>HPV14D\_Beta\_396918\_nt7101\_L1\_Tile|1  
ACAAAAACAGTTTTCGACTAGGGGATCCATCAAGGGTATTAAACGAAAACGCAAGAATTAG  
>HPV15\_Beta\_396924\_nt6039\_L1\_Tile|1  
ACCATTAGGAGTTGGTACTTCAGGCCATCCTTTATTCAACAAAGTAAAAGATACAGAGAA  
>HPV15\_Beta\_396924\_nt6044\_L1\_Tile|1  
TAGGAGTTGGTACTTCAGGCCATCCTTTATTCAACAAAGTAAAAGATACAGAGAATAACA  
>HPV15\_Beta\_396924\_nt6049\_L1\_Tile|1  
GTTGGTACTTCAGGCCATCCTTTATTCAACAAAGTAAAAGATACAGAGAATAACAGTAAT  
>HPV15\_Beta\_396924\_nt6059\_L1\_Tile|1  
CAGGCCATCCTTTATTCAACAAAGTAAAAGATACAGAGAATAACAGTAATTATCAAGGCA  
>HPV15\_Beta\_396924\_nt6064\_L1\_Tile|1

CATCCTTTATTCAACAAAGTAAAAGATACAGAGAATAACAGTAATTATCAAGGCAACTCT  
>HPV15\_Beta\_396924\_nt6069\_L1\_Tile|1  
TTTATTCAACAAAGTAAAAGATACAGAGAATAACAGTAATTATCAAGGCAACTCTACTGA  
>HPV15\_Beta\_396924\_nt6314\_L1\_Tile|1  
TAGGTTTTTGGTAACATTAATAACAAGGCCTTATCAGTTACTAAGTCAGATGTGAGTCTGG  
>HPV15\_Beta\_396924\_nt6319\_L1\_Tile|1  
TTTGGTAACATTAATAACAAGGCCTTATCAGTTACTAAGTCAGATGTGAGTCTGGATATA  
>HPV15\_Beta\_396924\_nt6324\_L1\_Tile|1  
TAACATTAATAACAAGGCCTTATCAGTTACTAAGTCAGATGTGAGTCTGGATATAGTGAA  
>HPV15\_Beta\_396924\_nt6549\_L1\_Tile|1  
TTTTTATTTACCAGCACAATCAACCCAACAACAAAATAAAGTTAGCAAATTCTACTTACTT  
>HPV15\_Beta\_396924\_nt6554\_L1\_Tile|1  
ATTTACCAGCACAATCAACCCAACAACAAAATAAAGTTAGCAAATTCTACTTACTTTCCCA  
>HPV15\_Beta\_396924\_nt6699\_L1\_Tile|1  
CATACTTTGGGGTAATCAGATGTTTATTACTGTTGCAGATAACACAAGGAATACAAATTT  
>HPV15\_Beta\_396924\_nt6709\_L1\_Tile|1  
GGTAATCAGATGTTTATTACTGTTGCAGATAACACAAGGAATACAAATTTTACTATTAGT  
>HPV15\_Beta\_396924\_nt6734\_L1\_Tile|1  
CAGATAACACAAGGAATACAAATTTTACTATTAGTGTTACCTCTGATGGTAATGCCATAA  
>HPV15\_Beta\_396924\_nt6744\_L1\_Tile|1  
AAGGAATACAAATTTTACTATTAGTGTTACCTCTGATGGTAATGCCATAAATGAATATAA  
>HPV15\_Beta\_396924\_nt6759\_L1\_Tile|1  
TACTATTAGTGTTACCTCTGATGGTAATGCCATAAATGAATATAATTCACAAAATATCAG  
>HPV16\_Alpha\_9627100\_nt6015\_L1\_Tile|1  
GGATGACACAGAAAATGCTAGTGCTTATGCAGCAAATGCAGGTGTGGATAATAGAGAATG  
>HPV16\_Alpha\_9627100\_nt6020\_L1\_Tile|1  
ACACAGAAAATGCTAGTGCTTATGCAGCAAATGCAGGTGTGGATAATAGAGAATGTATAT  
>HPV16\_Alpha\_9627100\_nt6025\_L1\_Tile|1  
GAAAATGCTAGTGCTTATGCAGCAAATGCAGGTGTGGATAATAGAGAATGTATATCTATG  
>HPV16\_Alpha\_9627100\_nt6035\_L1\_Tile|1  
GTGCTTATGCAGCAAATGCAGGTGTGGATAATAGAGAATGTATATCTATGGATTACAAAC  
>HPV16\_Alpha\_9627100\_nt6120\_L1\_Tile|1  
CAAACCACCTATAGGGGAACACTGGGGCAAAGGATCCCCATGTACCAATGTTGCAGTAAA  
>HPV16\_Alpha\_9627100\_nt6125\_L1\_Tile|1  
CACCTATAGGGGAACACTGGGGCAAAGGATCCCCATGTACCAATGTTGCAGTAAATCCAG  
>HPV16\_Alpha\_9627100\_nt6155\_L1\_Tile|1  
CCCCATGTACCAATGTTGCAGTAAATCCAGGTGATTGTCCACCATTAGAGTTAATAAACA  
>HPV16\_Alpha\_9627100\_nt6160\_L1\_Tile|1  
TGTACCAATGTTGCAGTAAATCCAGGTGATTGTCCACCATTAGAGTTAATAAACACAGTT  
>HPV16\_Alpha\_9627100\_nt6420\_L1\_Tile|1  
TAATAGGGCTGGTACTGTTGGTGAAAATGTACCAGACGATTTATACATTAAAGGCTCTGG  
>HPV16\_Alpha\_9627100\_nt6425\_L1\_Tile|1  
GGGCTGGTACTGTTGGTGAAAATGTACCAGACGATTTATACATTAAAGGCTCTGGGTCTA  
>HPV16\_Alpha\_9627100\_nt6440\_L1\_Tile|1  
GTGAAAATGTACCAGACGATTTATACATTAAAGGCTCTGGGTCTACTGCAAATTTAGCCA  
>HPV16\_Alpha\_9627100\_nt6445\_L1\_Tile|1  
AATGTACCAGACGATTTATACATTAAAGGCTCTGGGTCTACTGCAAATTTAGCCAGTTCA  
>HPV16\_Alpha\_9627100\_nt6450\_L1\_Tile|1  
ACCAGACGATTTATACATTAAAGGCTCTGGGTCTACTGCAAATTTAGCCAGTTCAAATTA  
>HPV16\_Alpha\_9627100\_nt6455\_L1\_Tile|1  
ACGATTTATACATTAAAGGCTCTGGGTCTACTGCAAATTTAGCCAGTTCAAATTATTTTC  
>HPV16\_Alpha\_9627100\_nt6460\_L1\_Tile|1  
TTATACATTAAAGGCTCTGGGTCTACTGCAAATTTAGCCAGTTCAAATTATTTTCCTACA  
>HPV16\_Alpha\_9627100\_nt6640\_L1\_Tile|1  
GATACTACACGCAGTACAAATATGTCATTATGTGCTGCCATATCTACTTCAGAAACTACA

>HPV16\_Alpha\_9627100\_nt6650\_L1\_Tile|1  
GCAGTACAAATATGTCATTATGTGCTGCCATATCTACTTCAGAACTACATATAAAAAATA  
>HPV16\_Alpha\_9627100\_nt6655\_L1\_Tile|1  
ACAAATATGTCATTATGTGCTGCCATATCTACTTCAGAACTACATATAAAAAATACTAAC  
>HPV16\_Alpha\_9627100\_nt6820\_L1\_Tile|1  
AATTCCACTATTTTGGAGGACTGGAATTTTGGTCTACAACCTCCCCCAGGAGGCACACTA  
>HPV16\_Alpha\_9627100\_nt6845\_L1\_Tile|1  
ATTTTGGTCTACAACCTCCCCCAGGAGGCACACTAGAAGATACTTATAGGTTTGTAAACCC  
>HPV16\_Alpha\_9627100\_nt6850\_L1\_Tile|1  
GGTCTACAACCTCCCCCAGGAGGCACACTAGAAGATACTTATAGGTTTGTAAACCCAGGCA  
>HPV16\_Alpha\_9627100\_nt6860\_L1\_Tile|1  
CTCCCCCAGGAGGCACACTAGAAGATACTTATAGGTTTGTAAACCCAGGCAATTGCTTGTC  
>HPV16\_Alpha\_9627100\_nt6865\_L1\_Tile|1  
CCAGGAGGCACACTAGAAGATACTTATAGGTTTGTAAACCCAGGCAATTGCTTGTCAAAAA  
>HPV16\_Alpha\_9627100\_nt6870\_L1\_Tile|1  
AGGCACACTAGAAGATACTTATAGGTTTGTAAACCCAGGCAATTGCTTGTCAAAAACATAC  
>HPV16\_Alpha\_9627100\_nt6880\_L1\_Tile|1  
GAAGATACTTATAGGTTTGTAAACCCAGGCAATTGCTTGTCAAAAACATACACCTCCAGCA  
>HPV16\_Alpha\_9627100\_nt6890\_L1\_Tile|1  
ATAGGTTTGTAAACCCAGGCAATTGCTTGTCAAAAACATACACCTCCAGCACCTAAAGAAG  
>HPV16\_Alpha\_9627100\_nt6900\_L1\_Tile|1  
AACCCAGGCAATTGCTTGTCAAAAACATACACCTCCAGCACCTAAAGAAGATGATCCCCCT  
>HPV16\_Alpha\_9627100\_nt6910\_L1\_Tile|1  
ATTGCTTGTCAAAAACATACACCTCCAGCACCTAAAGAAGATGATCCCCCTAAAAAATAC  
>HPV16\_Alpha\_9627100\_nt6915\_L1\_Tile|1  
TTGTCAAAAAACATACACCTCCAGCACCTAAAGAAGATGATCCCCCTAAAAAATACACTTT  
>HPV16\_Alpha\_9627100\_nt6920\_L1\_Tile|1  
AAAAACATACACCTCCAGCACCTAAAGAAGATGATCCCCCTAAAAAATACACTTTTTTGGG  
>HPV16\_Alpha\_9627100\_nt6930\_L1\_Tile|1  
ACCTCCAGCACCTAAAGAAGATGATCCCCCTAAAAAATACACTTTTTTGGGAAGTAAATTT  
>HPV16\_Alpha\_9627100\_nt6935\_L1\_Tile|1  
CAGCACCTAAAGAAGATGATCCCCCTAAAAAATACACTTTTTTGGGAAGTAAATTTAAAGG  
>HPV16\_Alpha\_9627100\_nt7020\_L1\_Tile|1  
GTTTCCTTTAGGACGCAAATTTTTACTACAAGCAGGATTGAAGGCCAAACCAAATTTAC  
>HPV16\_Alpha\_9627100\_nt7025\_L1\_Tile|1  
CTTTAGGACGCAAATTTTTACTACAAGCAGGATTGAAGGCCAAACCAAATTTACATTAG  
>HPV16\_Alpha\_9627100\_nt7030\_L1\_Tile|1  
GGACGCAAATTTTTACTACAAGCAGGATTGAAGGCCAAACCAAATTTACATTAGGAAAA  
>HPV16\_Alpha\_9627100\_nt7035\_L1\_Tile|1  
CAAATTTTTACTACAAGCAGGATTGAAGGCCAAACCAAATTTACATTAGGAAAACGAAA  
>HPV16\_Alpha\_9627100\_nt7040\_L1\_Tile|1  
TTTTACTACAAGCAGGATTGAAGGCCAAACCAAATTTACATTAGGAAAACGAAAAGCTA  
>HPV16\_Alpha\_9627100\_nt7050\_L1\_Tile|1  
AGCAGGATTGAAGGCCAAACCAAATTTACATTAGGAAAACGAAAAGCTACACCCACCAC  
>HPV16\_Alpha\_9627100\_nt7055\_L1\_Tile|1  
GATTGAAGGCCAAACCAAATTTACATTAGGAAAACGAAAAGCTACACCCACCACCTCAT  
>HPV16\_Alpha\_9627100\_nt7065\_L1\_Tile|1  
CAAACCAAATTTACATTAGGAAAACGAAAAGCTACACCCACCACCTCATCTACCTCTAC  
>HPV16\_Alpha\_9627100\_nt7070\_L1\_Tile|1  
CAAATTTACATTAGGAAAACGAAAAGCTACACCCACCACCTCATCTACCTCTACAACCTG  
>HPV16\_Alpha\_9627100\_nt7075\_L1\_Tile|1  
TTTACATTAGGAAAACGAAAAGCTACACCCACCACCTCATCTACCTCTACAACCTGCTAAA  
>HPV16\_Alpha\_9627100\_nt7085\_L1\_Tile|1  
GAAAACGAAAAGCTACACCCACCACCTCATCTACCTCTACAACCTGCTAAAACGCAAAAAAC  
>HPV16\_Alpha\_9627100\_nt7095\_L1\_Tile|1

AGCTACACCCACCACCTCATCTACCTCTACAACCTGCTAAACGCCAAAAACGTAAGCTGTA  
>HPV16\_Alpha\_9627100\_nt7096\_L1\_Tile|1  
GCTACACCCACCACCTCATCTACCTCTACAACCTGCTAAACGCCAAAAACGTAAGCTGTAA  
>HPV17\_Beta\_396932\_nt6085\_L1\_Tile|1  
CATCCCTTGTTTAATAAGTTAAGAGACACTGAAAATAACAGTAGCTATCAAGGTGGATCT  
>HPV17\_Beta\_396932\_nt6205\_L1\_Tile|1  
TGTGTACCTTGTATTGGAGAACATTGGGACAGGGCTCCTGTATGTGAAAATGAACAAAAC  
>HPV17\_Beta\_396932\_nt6210\_L1\_Tile|1  
ACCTTGTATTGGAGAACATTGGGACAGGGCTCCTGTATGTGAAAATGAACAAAACAATCA  
>HPV17\_Beta\_396932\_nt6215\_L1\_Tile|1  
GTATTGGAGAACATTGGGACAGGGCTCCTGTATGTGAAAATGAACAAAACAATCAAACAG  
>HPV17\_Beta\_396932\_nt6230\_L1\_Tile|1  
GGGACAGGGCTCCTGTATGTGAAAATGAACAAAACAATCAAACAGGCCTGTGTCCACCAT  
>HPV17\_Beta\_396932\_nt6240\_L1\_Tile|1  
TCCTGTATGTGAAAATGAACAAAACAATCAAACAGGCCTGTGTCCACCATTTGAATTAAA  
>HPV17\_Beta\_396932\_nt6245\_L1\_Tile|1  
TATGTGAAAATGAACAAAACAATCAAACAGGCCTGTGTCCACCATTTGAATTAAAAACA  
>HPV17\_Beta\_396932\_nt6255\_L1\_Tile|1  
TGAACAAAACAATCAAACAGGCCTGTGTCCACCATTTGAATTAAAAACACTGTTATCGA  
>HPV17\_Beta\_396932\_nt6565\_L1\_Tile|1  
CACAAATTTTATTTACCAGCTCAAACCTGGCCAACAACAGCGCACTTTGGGTAATTCCACT  
>HPV17\_Beta\_396932\_nt6730\_L1\_Tile|1  
GGGAATCAGATATTTGTGACTGTAGCTGACAACACTAGGAACACAAATTTTCTATTAGC  
>HPV17\_Beta\_396932\_nt6745\_L1\_Tile|1  
GTGACTGTAGCTGACAACACTAGGAACACAAATTTTCTATTAGCGTGTCTACAGAAGCT  
>HPV17\_Beta\_396932\_nt6755\_L1\_Tile|1  
CTGACAACACTAGGAACACAAATTTTCTATTAGCGTGTCTACAGAAGCTGGGGCTGTTA  
>HPV17\_Beta\_396932\_nt7100\_L1\_Tile|1  
ATGTAAATCTTACTGAGAAATTATCATTAGATTTAGATCAGTATCCCCTAGGACGAAAAT  
>HPV17\_Beta\_396932\_nt7105\_L1\_Tile|1  
AATCTTACTGAGAAATTATCATTAGATTTAGATCAGTATCCCCTAGGACGAAAATTTATT  
>HPV18\_Alpha\_9626069\_nt5436\_L1\_Tile|1  
CCTGTATACACGGGTCCTGATATTACATTACCATCTACTACCTCTGTATGGCCCATTGTA  
>HPV18\_Alpha\_9626069\_nt5441\_L1\_Tile|1  
ATACACGGGTCCTGATATTACATTACCATCTACTACCTCTGTATGGCCCATTGTATCACC  
>HPV18\_Alpha\_9626069\_nt5446\_L1\_Tile|1  
CGGGTCCTGATATTACATTACCATCTACTACCTCTGTATGGCCCATTGTATCACCACGG  
>HPV18\_Alpha\_9626069\_nt5466\_L1\_Tile|1  
CCATCTACTACCTCTGTATGGCCCATTGTATCACCACGGCCCCCTGCCTCTACACAGTAT  
>HPV18\_Alpha\_9626069\_nt5476\_L1\_Tile|1  
CCTCTGTATGGCCCATTGTATCACCACGGCCCCCTGCCTCTACACAGTATATTGGTATAC  
>HPV18\_Alpha\_9626069\_nt5481\_L1\_Tile|1  
GTATGGCCCATTGTATCACCACGGCCCCCTGCCTCTACACAGTATATTGGTATACATGGT  
>HPV18\_Alpha\_9626069\_nt5486\_L1\_Tile|1  
GCCCATTGTATCACCACGGCCCCCTGCCTCTACACAGTATATTGGTATACATGGTACACA  
>HPV18\_Alpha\_9626069\_nt5491\_L1\_Tile|1  
TTGTATCACCACGGCCCCCTGCCTCTACACAGTATATTGGTATACATGGTACACATTATT  
>HPV18\_Alpha\_9626069\_nt5496\_L1\_Tile|1  
TCAACACGGCCCCCTGCCTCTACACAGTATATTGGTATACATGGTACACATTATTATTG  
>HPV18\_Alpha\_9626069\_nt5506\_L1\_Tile|1  
CCCCTGCCTCTACACAGTATATTGGTATACATGGTACACATTATTATTTGTGGCCATTAT  
>HPV18\_Alpha\_9626069\_nt5511\_L1\_Tile|1  
GCCTCTACACAGTATATTGGTATACATGGTACACATTATTATTTGTGGCCATTATATTAT  
>HPV18\_Alpha\_9626069\_nt5976\_L1\_Tile|1  
ATTTTATAATAAATTAGATGACACTGAAAGTCCCATGCCGCCACGTCTAATGTTTCTGA



>HPV18\_Alpha\_9626069\_nt5981\_L1\_Tile|1  
ATAATAAATTAGATGACACTGAAAGTTCCCATGCCGCCACGTCTAATGTTTCTGAGGACG  
>HPV18\_Alpha\_9626069\_nt5996\_L1\_Tile|1  
ACACTGAAAGTTCCCATGCCGCCACGTCTAATGTTTCTGAGGACGTTAGGGACAATGTGT  
>HPV18\_Alpha\_9626069\_nt6131\_L1\_Tile|1  
CTGCTTGTAATCGCGTCCTTTATCACAGGGCGATTGCCCCCCTTTAGAACTTAAAAACA  
>HPV18\_Alpha\_9626069\_nt6136\_L1\_Tile|1  
TGTAATCGCGTCCTTTATCACAGGGCGATTGCCCCCCTTTAGAACTTAAAAACACAGTT  
>HPV18\_Alpha\_9626069\_nt6146\_L1\_Tile|1  
GTCCTTTATCACAGGGCGATTGCCCCCCTTTAGAACTTAAAAACACAGTTTGGGAAGATG  
>HPV18\_Alpha\_9626069\_nt6421\_L1\_Tile|1  
ACTGTGCCTCAATCCTTATATATTAAGGCACAGGTATGCCTGCTTCACCTGGCAGCTGT  
>HPV18\_Alpha\_9626069\_nt6426\_L1\_Tile|1  
GCCTCAATCCTTATATATTAAGGCACAGGTATGCCTGCTTCACCTGGCAGCTGTGTGTA  
>HPV18\_Alpha\_9626069\_nt6441\_L1\_Tile|1  
TATTAAAGGCACAGGTATGCCTGCTTCACCTGGCAGCTGTGTGTATTCTCCCTCTCCAAG  
>HPV18\_Alpha\_9626069\_nt6621\_L1\_Tile|1  
CACTCCCAGTACCAATTTAACAATATGTGCTTCTACACAGTCTCCTGTACCTGGGCAATA  
>HPV18\_Alpha\_9626069\_nt6626\_L1\_Tile|1  
CCAGTACCAATTTAACAATATGTGCTTCTACACAGTCTCCTGTACCTGGGCAATATGATG  
>HPV18\_Alpha\_9626069\_nt6631\_L1\_Tile|1  
ACCAATTTAACAATATGTGCTTCTACACAGTCTCCTGTACCTGGGCAATATGATGCTACC  
>HPV18\_Alpha\_9626069\_nt6636\_L1\_Tile|1  
TTTAACAATATGTGCTTCTACACAGTCTCCTGTACCTGGGCAATATGATGCTACCAAATT  
>HPV18\_Alpha\_9626069\_nt6641\_L1\_Tile|1  
CAATATGTGCTTCTACACAGTCTCCTGTACCTGGGCAATATGATGCTACCAAATTTAAGC  
>HPV18\_Alpha\_9626069\_nt6651\_L1\_Tile|1  
TTCTACACAGTCTCCTGTACCTGGGCAATATGATGCTACCAAATTTAAGCAGTATAGCAG  
>HPV18\_Alpha\_9626069\_nt6791\_L1\_Tile|1  
ATAGTATGAATAGCAGTATTTTAGAGGATTGGAACCTTGGTGTCCCCCCCCCCCCAACTA  
>HPV18\_Alpha\_9626069\_nt7078\_L1\_Tile|1  
CCATCTGCCACTACGTCTTCTAAACCTGCCAAGCGTGTGCGTGACGTGCCAGGAAGTAA  
>HPV19\_Beta\_396940\_nt5795\_L1\_Tile|1  
TACTTACATCCCAGCCTTCGCAAGCGATTCAAACGAAAACGTAAATATTTATAATTTTCT  
>HPV19\_Beta\_396940\_nt5800\_L1\_Tile|1  
ACATCCCAGCCTTCGCAAGCGATTCAAACGAAAACGTAAATATTTATAATTTTCTTTTGC  
>HPV19\_Beta\_396940\_nt6005\_L1\_Tile|1  
CCCATATTTTAATGTTTATAATGTTGCAGGATCAAAATTAGAAATTCCAAAAGTTTCAGG  
>HPV19\_Beta\_396940\_nt6010\_L1\_Tile|1  
ATTTTAATGTTTATAATGTTGCAGGATCAAAATTAGAAATTCCAAAAGTTTCAGGAAATC  
>HPV19\_Beta\_396940\_nt6360\_L1\_Tile|1  
GAACACTGGGATAAAGCATTACCATGTGCTGAGCAAGATATTCCTCAGGGATCCTGTCCT  
>HPV19\_Beta\_396940\_nt6370\_L1\_Tile|1  
ATAAAGCATTACCATGTGCTGAGCAAGATATTCCTCAGGGATCCTGTCTCCTATAGAGT  
>HPV19\_Beta\_396940\_nt6375\_L1\_Tile|1  
GCATTACCATGTGCTGAGCAAGATATTCCTCAGGGATCCTGTCTCCTATAGAGTTAATT  
>HPV19\_Beta\_396940\_nt6380\_L1\_Tile|1  
ACCATGTGCTGAGCAAGATATTCCTCAGGGATCCTGTCTCCTATAGAGTTAATTAAGTCA  
>HPV19\_Beta\_396940\_nt6385\_L1\_Tile|1  
GTGCTGAGCAAGATATTCCTCAGGGATCCTGTCTCCTATAGAGTTAATTAAGTCAAGTCA  
>HPV19\_Beta\_396940\_nt6400\_L1\_Tile|1  
TTCCTCAGGGATCCTGTCTCCTATAGAGTTAATTAAGTCAAGTCAAGTCAAGTCAAGTCA  
>HPV19\_Beta\_396940\_nt6710\_L1\_Tile|1  
TACATACTACATACCTCCTAACAATAGTCAGCAACAATATACTAATTTAGGAAATGCCAT  
>HPV19\_Beta\_396940\_nt7125\_L1\_Tile|1

GGTTTCGTGCCTGCACCCGATAATCCTATTTCAGGACACTTATAGATATATAGATTCTTTA  
>HPV19\_Beta\_396940\_nt7160\_L1\_Tile|1  
CACTTATAGATATATAGATTCTTTAGCTACTAGATGCCCTGACAAAAATCCTCCTAAGGA  
>HPV19\_Beta\_396940\_nt7355\_L1\_Tile|1  
TACAAAACTATATCTTCACGGGTCTCCAGCAGAGGAAGTAAAAGAAAGCGTAAAAATTA  
>HPV19\_Beta\_396940\_nt7356\_L1\_Tile|1  
ACAAAACTATATCTTCACGGGTCTCCAGCAGAGGAAGTAAAAGAAAGCGTAAAAATTAA  
>HPV20\_Beta\_1020162\_nt6039\_L1\_Tile|1  
CATATTTTAAATATATATGACATCCAAGGCACTAAGATAAAAGTCCCTAAGGTTTCTGGAA  
>HPV20\_Beta\_1020162\_nt6044\_L1\_Tile|1  
TTTAATATATATGACATCCAAGGCACTAAGATAAAAGTCCCTAAGGTTTCTGGAAATCAG  
>HPV20\_Beta\_1020162\_nt6049\_L1\_Tile|1  
TATATATGACATCCAAGGCACTAAGATAAAAGTCCCTAAGGTTTCTGGAAATCAGCACAG  
>HPV20\_Beta\_1020162\_nt6259\_L1\_Tile|1  
ATTATTTAATAAACTTGGTGACACAGAAAACCCCTAATTCATATAAAGGGAATTCAACTGA  
>HPV20\_Beta\_1020162\_nt6264\_L1\_Tile|1  
TTAATAAACTTGGTGACACAGAAAACCCCTAATTCATATAAAGGGAATTCAACTGATGATA  
>HPV20\_Beta\_1020162\_nt6269\_L1\_Tile|1  
AAACTTGGTGACACAGAAAACCCCTAATTCATATAAAGGGAATTCAACTGATGATAGACAA  
>HPV20\_Beta\_1020162\_nt6274\_L1\_Tile|1  
TGGTGACACAGAAAACCCCTAATTCATATAAAGGGAATTCAACTGATGATAGACAAAATGT  
>HPV20\_Beta\_1020162\_nt6399\_L1\_Tile|1  
GGGACAGGGCTTTACCATGTGCAGACGCGTTCCAAACCCAGGTTTCATGCCCTCCAATAG  
>HPV20\_Beta\_1020162\_nt6739\_L1\_Tile|1  
GAATGCATTCTACATTCCACCTGTGAATAATCAGGCACAGAACAACCTAGGTAATTCAAT  
>HPV20\_Beta\_1020162\_nt6744\_L1\_Tile|1  
CATTCTACATTCCACCTGTGAATAATCAGGCACAGAACAACCTAGGTAATTCAATGTATT  
>HPV20\_Beta\_1020162\_nt6894\_L1\_Tile|1  
GCATCTGCTGGTTCAATCAACTATTTGTTACTGTAGTAGATAATACTCGAAATACAAATT  
>HPV20\_Beta\_1020162\_nt6904\_L1\_Tile|1  
GTTCAATCAACTATTTGTTACTGTAGTAGATAATACTCGAAATACAAATTTTAGCATATC  
>HPV20\_Beta\_1020162\_nt6914\_L1\_Tile|1  
CTATTTGTTACTGTAGTAGATAATACTCGAAATACAAATTTTAGCATATCAGTTCATTCA  
>HPV20\_Beta\_1020162\_nt6919\_L1\_Tile|1  
TGTTACTGTAGTAGATAATACTCGAAATACAAATTTTAGCATATCAGTTCATTTCAGAAAA  
>HPV20\_Beta\_1020162\_nt6924\_L1\_Tile|1  
CTGTAGTAGATAATACTCGAAATACAAATTTTAGCATATCAGTTCATTTCAGAAAACACTG  
>HPV20\_Beta\_1020162\_nt6929\_L1\_Tile|1  
GTAGATAATACTCGAAATACAAATTTTAGCATATCAGTTCATTTCAGAAAACACTGATGTT  
>HPV20\_Beta\_1020162\_nt6934\_L1\_Tile|1  
TAATACTCGAAATACAAATTTTAGCATATCAGTTCATTTCAGAAAACACTGATGTTTCTAA  
>HPV20\_Beta\_1020162\_nt6949\_L1\_Tile|1  
AAATTTTAGCATATCAGTTCATTTCAGAAAACACTGATGTTTCTAAAATTCAAAATTATGA  
>HPV20\_Beta\_1020162\_nt6954\_L1\_Tile|1  
TTAGCATATCAGTTCATTTCAGAAAACACTGATGTTTCTAAAATTCAAAATTATGATTCTC  
>HPV20\_Beta\_1020162\_nt7249\_L1\_Tile|1  
AAGAGAAGATCCTTACAAGGATCTAACTTTTGAATGTTGACCTATCAGAAAGATTATC  
>HPV20\_Beta\_1020162\_nt7254\_L1\_Tile|1  
AAGATCCTTACAAGGATCTAACTTTTGAATGTTGACCTATCAGAAAGATTATCCTTAG  
>HPV20\_Beta\_1020162\_nt7259\_L1\_Tile|1  
CCTTACAAGGATCTAACTTTTGAATGTTGACCTATCAGAAAGATTATCCTTAGAATTG  
>HPV20\_Beta\_1020162\_nt7384\_L1\_Tile|1  
TACAAAACTGTATCTTCAAAGTTATCTACTAGGGGCGTCAAACGAAAACGCAAACAATA  
>HPV20\_Beta\_1020162\_nt7385\_L1\_Tile|1  
ACAAAACTGTATCTTCAAAGTTATCTACTAGGGGCGTCAAACGAAAACGCAAACAATA

>HPV21\_Beta\_1020170\_nt6300\_L1\_Tile|1  
TTAATAAAGTTGGGGACACAGAAAATCCTAGTTCATACAAAACCTCAACCAAATTCCTACTG  
>HPV21\_Beta\_1020170\_nt6305\_L1\_Tile|1  
AAAGTTGGGGACACAGAAAATCCTAGTTCATACAAAACCTCAACCAAATTCCTACTGATGAT  
>HPV21\_Beta\_1020170\_nt6430\_L1\_Tile|1  
AGGAGAACATTGGGATAAAGCTATCCCATGTGCAACTGACAATCCACCTCCAGGATCGTG  
>HPV21\_Beta\_1020170\_nt6445\_L1\_Tile|1  
TAAAGCTATCCCATGTGCAACTGACAATCCACCTCCAGGATCGTGCCCTCCGATTGAATT  
>HPV21\_Beta\_1020170\_nt6450\_L1\_Tile|1  
CTATCCCATGTGCAACTGACAATCCACCTCCAGGATCGTGCCCTCCGATTGAATTAATTA  
>HPV21\_Beta\_1020170\_nt6455\_L1\_Tile|1  
CCATGTGCAACTGACAATCCACCTCCAGGATCGTGCCCTCCGATTGAATTAATTAATTCA  
>HPV21\_Beta\_1020170\_nt6460\_L1\_Tile|1  
TGCAACTGACAATCCACCTCCAGGATCGTGCCCTCCGATTGAATTAATTAATTCAGCAAT  
>HPV21\_Beta\_1020170\_nt6970\_L1\_Tile|1  
AGTAGACAACACTCGTAACACAAACTTTAGTATTTTCAGTAAATCCTGAGAATGCAGACGT  
>HPV21\_Beta\_1020170\_nt6980\_L1\_Tile|1  
ACTCGTAACACAAACTTTAGTATTTTCAGTAAATCCTGAGAATGCAGACGTGTCTAAAATT  
>HPV21\_Beta\_1020170\_nt6985\_L1\_Tile|1  
TAACACAAACTTTAGTATTTTCAGTAAATCCTGAGAATGCAGACGTGTCTAAAATTGAAAA  
>HPV21\_Beta\_1020170\_nt6990\_L1\_Tile|1  
CAAACCTTTAGTATTTTCAGTAAATCCTGAGAATGCAGACGTGTCTAAAATTGAAAAATTATA  
>HPV21\_Beta\_1020170\_nt6995\_L1\_Tile|1  
TTTAGTATTTTCAGTAAATCCTGAGAATGCAGACGTGTCTAAAATTGAAAAATTATAAAGCC  
>HPV21\_Beta\_1020170\_nt7000\_L1\_Tile|1  
TATTTTCAGTAAATCCTGAGAATGCAGACGTGTCTAAAATTGAAAAATTATAAAGCCGAGAG  
>HPV21\_Beta\_1020170\_nt7005\_L1\_Tile|1  
CAGTAAATCCTGAGAATGCAGACGTGTCTAAAATTGAAAAATTATAAAGCCGAGAGCTTTC  
>HPV21\_Beta\_1020170\_nt7425\_L1\_Tile|1  
GTACAAAGACACTTTCTTCAAGGGTATCTACCAGAGGAATTAAACGAAAACGCAAAAATT  
>HPV21\_Beta\_1020170\_nt7427\_L1\_Tile|1  
ACAAAGACACTTTCTTCAAGGGTATCTACCAGAGGAATTAAACGAAAACGCAAAAATTAG  
>HPV22\_Beta\_1020178\_nt5883\_L1\_Tile|1  
TTAGAGTAACATTTCCAGATCCTAACAAATTTGCTTTGGGAGATATGACAATCCATGATC  
>HPV22\_Beta\_1020178\_nt5893\_L1\_Tile|1  
ATTTCCAGATCCTAACAAATTTGCTTTGGGAGATATGACAATCCATGATCCCGAAAGGTA  
>HPV22\_Beta\_1020178\_nt5898\_L1\_Tile|1  
CAGATCCTAACAAATTTGCTTTGGGAGATATGACAATCCATGATCCCGAAAGGTATAGAT  
>HPV22\_Beta\_1020178\_nt5903\_L1\_Tile|1  
CCTAACAAATTTGCTTTGGGAGATATGACAATCCATGATCCCGAAAGGTATAGATTAGTA  
>HPV22\_Beta\_1020178\_nt5908\_L1\_Tile|1  
CAAATTTGCTTTGGGAGATATGACAATCCATGATCCCGAAAGGTATAGATTAGTATGGGC  
>HPV22\_Beta\_1020178\_nt5913\_L1\_Tile|1  
TTGCTTTGGGAGATATGACAATCCATGATCCCGAAAGGTATAGATTAGTATGGGCTTGTA  
>HPV22\_Beta\_1020178\_nt5918\_L1\_Tile|1  
TTGGGAGATATGACAATCCATGATCCCGAAAGGTATAGATTAGTATGGGCTTGTAAGGG  
>HPV22\_Beta\_1020178\_nt5923\_L1\_Tile|1  
AGATATGACAATCCATGATCCCGAAAGGTATAGATTAGTATGGGCTTGTAAGGGTTAGA  
>HPV22\_Beta\_1020178\_nt5928\_L1\_Tile|1  
TGACAATCCATGATCCCGAAAGGTATAGATTAGTATGGGCTTGTAAGGGTTAGAAATAG  
>HPV22\_Beta\_1020178\_nt5933\_L1\_Tile|1  
ATCCATGATCCCGAAAGGTATAGATTAGTATGGGCTTGTAAGGGTTAGAAATAGGAAGA  
>HPV22\_Beta\_1020178\_nt6028\_L1\_Tile|1  
ATTATTTAATAAATTACATGATACTGAAAACCTACTGAACGCCAGGAAGGAACATCAGA  
>HPV22\_Beta\_1020178\_nt6033\_L1\_Tile|1

TTAATAAATTACATGATACTGAAAACCCCTACTGAACGCCAGGAAGGAACATCAGATGATA  
>HPV22\_Beta\_1020178\_nt6038\_L1\_Tile|1  
AAATTACATGATACTGAAAACCCCTACTGAACGCCAGGAAGGAACATCAGATGATAGAAGA  
>HPV22\_Beta\_1020178\_nt6043\_L1\_Tile|1  
ACATGATACTGAAAACCCCTACTGAACGCCAGGAAGGAACATCAGATGATAGAAGAAATGT  
>HPV22\_Beta\_1020178\_nt6288\_L1\_Tile|1  
ATAATAAAACACTATCATTTAATAGATCTGATGTAAGCTTAGACATTGTAAATGAAATCT  
>HPV22\_Beta\_1020178\_nt6358\_L1\_Tile|1  
TGATTTTCTTACAATGTCAAATGATGTCTATGGCGACTCATGCTTTTTTTGTGCACGTAG  
>HPV22\_Beta\_1020178\_nt6363\_L1\_Tile|1  
TTCTTACAATGTCAAATGATGTCTATGGCGACTCATGCTTTTTTTGTGCACGTAGGGAGC  
>HPV22\_Beta\_1020178\_nt6428\_L1\_Tile|1  
TATGCACGACACAATTTTGTACGTGGTGGTCTTGTGGTGATGCTATACCAGATGATGCA  
>HPV22\_Beta\_1020178\_nt6433\_L1\_Tile|1  
ACGACACAATTTTGTACGTGGTGGTCTTGTGGTGATGCTATACCAGATGATGCAGTTCA  
>HPV22\_Beta\_1020178\_nt6443\_L1\_Tile|1  
TTTGTACGTGGTGGTCTTGTGGTGATGCTATACCAGATGATGCAGTTCAACAAGATCAT  
>HPV22\_Beta\_1020178\_nt6453\_L1\_Tile|1  
GTGGTCTTGTGGTGATGCTATACCAGATGATGCAGTTCAACAAGATCATAAATATTACT  
>HPV22\_Beta\_1020178\_nt6458\_L1\_Tile|1  
CTTGTGGTGATGCTATACCAGATGATGCAGTTCAACAAGATCATAAATATTACTTGCCT  
>HPV22\_Beta\_1020178\_nt6473\_L1\_Tile|1  
ATACCAGATGATGCAGTTCAACAAGATCATAAATATTACTTGCCTGCAGCTTCACAGACT  
>HPV22\_Beta\_1020178\_nt6498\_L1\_Tile|1  
ATCATAAATATTACTTGCCTGCAGCTTCACAGACTGCTTTAGAAAACCTCCACTTACTTTC  
>HPV22\_Beta\_1020178\_nt6503\_L1\_Tile|1  
AAATATTACTTGCCTGCAGCTTCACAGACTGCTTTAGAAAACCTCCACTTACTTTCCAACC  
>HPV22\_Beta\_1020178\_nt6508\_L1\_Tile|1  
TTACTTGCCTGCAGCTTCACAGACTGCTTTAGAAAACCTCCACTTACTTTCCAACCGTTAG  
>HPV22\_Beta\_1020178\_nt6513\_L1\_Tile|1  
TGCCTGCAGCTTCACAGACTGCTTTAGAAAACCTCCACTTACTTTCCAACCGTTAGTGGTT  
>HPV22\_Beta\_1020178\_nt6518\_L1\_Tile|1  
GCAGCTTCACAGACTGCTTTAGAAAACCTCCACTTACTTTCCAACCGTTAGTGGTTCTTTA  
>HPV22\_Beta\_1020178\_nt6573\_L1\_Tile|1  
CTTTAGTAACCTCTGATGCCCACTATTCAACAGGCCTTTTTTGGTTGAAGCGCGCGCAGG  
>HPV22\_Beta\_1020178\_nt6683\_L1\_Tile|1  
GATAATACCCGTAACACTAATTTTTCTATTAGTGTGGCAAGTGACGGCACCACAGTTAAT  
>HPV22\_Beta\_1020178\_nt6688\_L1\_Tile|1  
TACCCGTAACACTAATTTTTCTATTAGTGTGGCAAGTGACGGCACCACAGTTAATTATGA  
>HPV22\_Beta\_1020178\_nt6693\_L1\_Tile|1  
GTAACACTAATTTTTCTATTAGTGTGGCAAGTGACGGCACCACAGTTAATTATGATGCTA  
>HPV22\_Beta\_1020178\_nt6698\_L1\_Tile|1  
ACTAATTTTTCTATTAGTGTGGCAAGTGACGGCACCACAGTTAATTATGATGCTAAAAAA  
>HPV22\_Beta\_1020178\_nt6703\_L1\_Tile|1  
TTTTTCTATTAGTGTGGCAAGTGACGGCACCACAGTTAATTATGATGCTAAAAAAATCAG  
>HPV22\_Beta\_1020178\_nt6708\_L1\_Tile|1  
CTATTAGTGTGGCAAGTGACGGCACCACAGTTAATTATGATGCTAAAAAAATCAGAGAAT  
>HPV22\_Beta\_1020178\_nt6718\_L1\_Tile|1  
GGCAAGTGACGGCACCACAGTTAATTATGATGCTAAAAAAATCAGAGAATTTATGCGCCA  
>HPV22\_Beta\_1020178\_nt6738\_L1\_Tile|1  
TTAATTATGATGCTAAAAAAATCAGAGAATTTATGCGCCATGTGGAAGAATACCAATTAT  
>HPV22\_Beta\_1020178\_nt6763\_L1\_Tile|1  
AGAATTTATGCGCCATGTGGAAGAATACCAATTATCCTTTATTTTGCAGCTATGTAGAAT  
>HPV22\_Beta\_1020178\_nt6768\_L1\_Tile|1  
TTATGCGCCATGTGGAAGAATACCAATTATCCTTTATTTTGCAGCTATGTAGAATACCAT

>HPV22\_Beta\_1020178\_nt6773\_L1\_Tile|1  
CGCCATGTGGAAGAATACCAATTATCCTTTATTTTGCAGCTATGTAGAATACCATTAGAA  
>HPV22\_Beta\_1020178\_nt6783\_L1\_Tile|1  
AAGAATACCAATTATCCTTTATTTTGCAGCTATGTAGAATACCATTAGAAGCAGAGGTAT  
>HPV22\_Beta\_1020178\_nt6788\_L1\_Tile|1  
TACCAATTATCCTTTATTTTGCAGCTATGTAGAATACCATTAGAAGCAGAGGTATTAAC  
>HPV22\_Beta\_1020178\_nt6793\_L1\_Tile|1  
ATTATCCTTTATTTTGCAGCTATGTAGAATACCATTAGAAGCAGAGGTATTAACCAAA  
>HPV22\_Beta\_1020178\_nt6808\_L1\_Tile|1  
GCAGCTATGTAGAATACCATTAGAAGCAGAGGTATTAACCAAAATTAATGCCATGAATCA  
>HPV22\_Beta\_1020178\_nt6813\_L1\_Tile|1  
TATGTAGAATACCATTAGAAGCAGAGGTATTAACCAAAATTAATGCCATGAATCATGGCA  
>HPV22\_Beta\_1020178\_nt7063\_L1\_Tile|1  
GTATCCACTGGGTCGTAAATTTTATTTCAATCTGGGTACAAACGTGCAAGGGCCAGTGC  
>HPV22\_Beta\_1020178\_nt7083\_L1\_Tile|1  
TTTTATTTCAATCTGGGTACAAACGTGCAAGGGCCAGTGCCAGGGTCAGTGTGAAACGTT  
>HPV22\_Beta\_1020178\_nt7088\_L1\_Tile|1  
TTTCAATCTGGGTACAAACGTGCAAGGGCCAGTGCCAGGGTCAGTGTGAAACGTTCTGCT  
>HPV22\_Beta\_1020178\_nt7098\_L1\_Tile|1  
GGTTACAACGTGCAAGGGCCAGTGCCAGGGTCAGTGTGAAACGTTCTGCTACGCGGAAAA  
>HPV22\_Beta\_1020178\_nt7128\_L1\_Tile|1  
TCAGTGTGAAACGTTCTGCTACGCGGAAAAACGTTCTAAAACTGTAAACGAAGGAACTTA  
>HPV23\_Beta\_1020186\_nt5816\_L1\_Tile|1  
TGTTAGATCACCGGATGGTAGTAAATAGATGTACCAAAGGTTTCAGGGAATCAATTCAG  
>HPV23\_Beta\_1020186\_nt5896\_L1\_Tile|1  
CAGACCTAATAAGTTTGCATTAGCAGACATGACTATCTATGATCCTGATAAATACAGGT  
>HPV23\_Beta\_1020186\_nt5971\_L1\_Tile|1  
CAGGACTTGAAATCGGCCGCGGCCAACCTTTAGGGGTCGGCAGTACAGGACACCCGCTAT  
>HPV23\_Beta\_1020186\_nt6001\_L1\_Tile|1  
TAGGGGTCGGCAGTACAGGACACCCGCTATTTAATAAGCTCCGTGATGCAGAAAATTCTA  
>HPV23\_Beta\_1020186\_nt6006\_L1\_Tile|1  
GTCGGCAGTACAGGACACCCGCTATTTAATAAGCTCCGTGATGCAGAAAATTCTAGTGAA  
>HPV23\_Beta\_1020186\_nt6026\_L1\_Tile|1  
GCTATTTAATAAGCTCCGTGATGCAGAAAATTCTAGTGAACGTCAGGAAGGTACTGTAGA  
>HPV23\_Beta\_1020186\_nt6031\_L1\_Tile|1  
TTAATAAGCTCCGTGATGCAGAAAATTCTAGTGAACGTCAGGAAGGTACTGTAGATGACA  
>HPV23\_Beta\_1020186\_nt6041\_L1\_Tile|1  
CCGTGATGCAGAAAATTCTAGTGAACGTCAGGAAGGTACTGTAGATGACAGAAGAAATAT  
>HPV23\_Beta\_1020186\_nt6046\_L1\_Tile|1  
ATGCAGAAAATTCTAGTGAACGTCAGGAAGGTACTGTAGATGACAGAAGAAATATCTCAT  
>HPV23\_Beta\_1020186\_nt6051\_L1\_Tile|1  
GAAAATTCTAGTGAACGTCAGGAAGGTACTGTAGATGACAGAAGAAATATCTCATTTGAT  
>HPV23\_Beta\_1020186\_nt6166\_L1\_Tile|1  
GGGATACAGCTCCTGTCTGTAAAGATGCAGGTAGCCAACTAGGGTTGTGTCCTCCTTTAG  
>HPV23\_Beta\_1020186\_nt6181\_L1\_Tile|1  
TCTGTAAAGATGCAGGTAGCCAACTAGGGTTGTGTCCTCCTTTAGAAATAAAAACAGTG  
>HPV23\_Beta\_1020186\_nt6236\_L1\_Tile|1  
CAGTGTATAGAAGATGGGGACATGTTTCGACATTGGCTTTGGTAATATCAATAATAAAAC  
>HPV23\_Beta\_1020186\_nt6246\_L1\_Tile|1  
GAAGATGGGGACATGTTTCGACATTGGCTTTGGTAATATCAATAATAAAACATTATCCTTT  
>HPV23\_Beta\_1020186\_nt6256\_L1\_Tile|1  
ACATGTTTCGACATTGGCTTTGGTAATATCAATAATAAAACATTATCCTTTAATAGATCAG  
>HPV23\_Beta\_1020186\_nt6286\_L1\_Tile|1  
ATAATAAAACATTATCCTTTAATAGATCAGATGTTAGTTTAGATCTTGTAATGAGGTTT  
>HPV23\_Beta\_1020186\_nt6476\_L1\_Tile|1

TGATGGTGCAGTTCAACAGGATCACAAATATTATTTACCTGCAGACCAACAAAACACTTT  
>HPV23\_Beta\_1020186\_nt6491\_L1\_Tile|1  
ACAGGATCACAAATATTATTTACCTGCAGACCAACAAAACACTTTAGAAAACACTCTTA  
>HPV23\_Beta\_1020186\_nt6501\_L1\_Tile|1  
AAATATTATTTACCTGCAGACCAACAAAACACTTTAGAAAACACTCTTTATTTTCCTACT  
>HPV23\_Beta\_1020186\_nt6506\_L1\_Tile|1  
TTATTTACCTGCAGACCAACAAAACACTTTAGAAAACACTCTTTATTTTCCTACTGTCAG  
>HPV23\_Beta\_1020186\_nt6516\_L1\_Tile|1  
GCAGACCAACAAAACACTTTAGAAAACACTCTTTATTTTCCTACTGTCAGTGGATCTTTG  
>HPV23\_Beta\_1020186\_nt6521\_L1\_Tile|1  
CCAACAAAACACTTTAGAAAACACTCTTTATTTTCCTACTGTCAGTGGATCTTTGGTAAC  
>HPV23\_Beta\_1020186\_nt6526\_L1\_Tile|1  
AAAACACTTTAGAAAACACTCTTTATTTTCCTACTGTCAGTGGATCTTTGGTAACCTCTG  
>HPV23\_Beta\_1020186\_nt6646\_L1\_Tile|1  
TTTTATGGAACAACCAGATGTTTGTGACTGTAGCAGATAATACACGTAATACAACTTTA  
>HPV23\_Beta\_1020186\_nt6651\_L1\_Tile|1  
TGGAACAACCAGATGTTTGTGACTGTAGCAGATAATACACGTAATACAACTTTAGTATC  
>HPV23\_Beta\_1020186\_nt6666\_L1\_Tile|1  
TTTGTGACTGTAGCAGATAATACACGTAATACAACTTTAGTATCAGTGTTACCAATGAC  
>HPV23\_Beta\_1020186\_nt6671\_L1\_Tile|1  
GACTGTAGCAGATAATACACGTAATACAACTTTAGTATCAGTGTTACCAATGACAGCAG  
>HPV23\_Beta\_1020186\_nt6676\_L1\_Tile|1  
TAGCAGATAATACACGTAATACAACTTTAGTATCAGTGTTACCAATGACAGCAGTTTAG  
>HPV23\_Beta\_1020186\_nt6681\_L1\_Tile|1  
GATAATACACGTAATACAACTTTAGTATCAGTGTTACCAATGACAGCAGTTTAGAAAAG  
>HPV23\_Beta\_1020186\_nt6686\_L1\_Tile|1  
TACACGTAATACAACTTTAGTATCAGTGTTACCAATGACAGCAGTTTAGAAAAGTATGA  
>HPV23\_Beta\_1020186\_nt6691\_L1\_Tile|1  
GTAATACAACTTTAGTATCAGTGTTACCAATGACAGCAGTTTAGAAAAGTATGATGCCA  
>HPV23\_Beta\_1020186\_nt6696\_L1\_Tile|1  
ACAACTTTAGTATCAGTGTTACCAATGACAGCAGTTTAGAAAAGTATGATGCCACTAAA  
>HPV23\_Beta\_1020186\_nt6701\_L1\_Tile|1  
CTTTAGTATCAGTGTTACCAATGACAGCAGTTTAGAAAAGTATGATGCCACTAAAATTAG  
>HPV23\_Beta\_1020186\_nt6706\_L1\_Tile|1  
GTATCAGTGTTACCAATGACAGCAGTTTAGAAAAGTATGATGCCACTAAAATTAGAGAGT  
>HPV23\_Beta\_1020186\_nt6711\_L1\_Tile|1  
AGTGTTACCAATGACAGCAGTTTAGAAAAGTATGATGCCACTAAAATTAGAGAGTTTACA  
>HPV23\_Beta\_1020186\_nt6716\_L1\_Tile|1  
TACCAATGACAGCAGTTTAGAAAAGTATGATGCCACTAAAATTAGAGAGTTTACAAGACA  
>HPV23\_Beta\_1020186\_nt6721\_L1\_Tile|1  
ATGACAGCAGTTTAGAAAAGTATGATGCCACTAAAATTAGAGAGTTTACAAGACATGTTG  
>HPV23\_Beta\_1020186\_nt6741\_L1\_Tile|1  
TATGATGCCACTAAAATTAGAGAGTTTACAAGACATGTTGAAGAATACCAACTTTCTTTT  
>HPV23\_Beta\_1020186\_nt6761\_L1\_Tile|1  
AGAGTTTACAAGACATGTTGAAGAATACCAACTTTCTTTTATACTACAGTTGTGCAGGAT  
>HPV23\_Beta\_1020186\_nt6781\_L1\_Tile|1  
AAGAATACCAACTTTCTTTTATACTACAGTTGTGCAGGATACCTTTAAAGGCCGAGGTCT  
>HPV23\_Beta\_1020186\_nt6786\_L1\_Tile|1  
TACCAACTTTCTTTTATACTACAGTTGTGCAGGATACCTTTAAAGGCCGAGGTCTTAACA  
>HPV23\_Beta\_1020186\_nt6791\_L1\_Tile|1  
ACTTTCTTTTATACTACAGTTGTGCAGGATACCTTTAAAGGCCGAGGTCTTAACACAAAT  
>HPV23\_Beta\_1020186\_nt6796\_L1\_Tile|1  
CTTTTATACTACAGTTGTGCAGGATACCTTTAAAGGCCGAGGTCTTAACACAAATTAATG  
>HPV23\_Beta\_1020186\_nt6801\_L1\_Tile|1  
ATACTACAGTTGTGCAGGATACCTTTAAAGGCCGAGGTCTTAACACAAATTAATGCCATG

>HPV23\_Beta\_1020186\_nt6896\_L1\_Tile|1  
TGTTCCCTACACCAGATAATGCAGTTCATGACACATACAGATATTTGGCTTCAAAGGCCAC  
>HPV23\_Beta\_1020186\_nt6926\_L1\_Tile|1  
CACATACAGATATTTGGCTTCAAAGGCCACAAAATGTCCAGATGCAGTACCTGACACGCA  
>HPV23\_Beta\_1020186\_nt6936\_L1\_Tile|1  
TATTTGGCTTCAAAGGCCACAAAATGTCCAGATGCAGTACCTGACACGCAAAAAGAGGAT  
>HPV23\_Beta\_1020186\_nt7021\_L1\_Tile|1  
ATGTTGATATGACAGAAAAATTGTCTCTAGACCTAGATCAATATCCCTTAGGCCGTAAGT  
>HPV23\_Beta\_1020186\_nt7026\_L1\_Tile|1  
GATATGACAGAAAAATTGTCTCTAGACCTAGATCAATATCCCTTAGGCCGTAAGTTTCTG  
>HPV23\_Beta\_1020186\_nt7041\_L1\_Tile|1  
TTGTCTCTAGACCTAGATCAATATCCCTTAGGCCGTAAGTTTCTGTTTCAAATTGGAGTG  
>HPV23\_Beta\_1020186\_nt7051\_L1\_Tile|1  
ACCTAGATCAATATCCCTTAGGCCGTAAGTTTCTGTTTCAAATTGGAGTGCAGCGTGTAC  
>HPV23\_Beta\_1020186\_nt7061\_L1\_Tile|1  
ATATCCCTTAGGCCGTAAGTTTCTGTTTCAAATTGGAGTGCAGCGTGTACGGTCCGGTAC  
>HPV23\_Beta\_1020186\_nt7066\_L1\_Tile|1  
CCTTAGGCCGTAAGTTTCTGTTTCAAATTGGAGTGCAGCGTGTACGGTCCGGTACCAAAC  
>HPV23\_Beta\_1020186\_nt7086\_L1\_Tile|1  
TTTCAAATTGGAGTGCAGCGTGTACGGTCCGGTACCAAACGGCCTGCAACTCGAAAAGTG  
>HPV23\_Beta\_1020186\_nt7096\_L1\_Tile|1  
GAGTGCAGCGTGTACGGTCCGGTACCAAACGGCCTGCAACTCGAAAAGTGACCAAAACTG  
>HPV23\_Beta\_1020186\_nt7106\_L1\_Tile|1  
TGTACGGTCCGGTACCAAACGGCCTGCAACTCGAAAAGTGACCAAAACTGTCAAAAGGAA  
>HPV23\_Beta\_1020186\_nt7111\_L1\_Tile|1  
GGTCCGGTACCAAACGGCCTGCAACTCGAAAAGTGACCAAAACTGTCAAAAGGAAAAAAG  
>HPV23\_Beta\_1020186\_nt7116\_L1\_Tile|1  
GGTACCAAACGGCCTGCAACTCGAAAAGTGACCAAAACTGTCAAAAGGAAAAAAGTGCAA  
>HPV23\_Beta\_1020186\_nt7122\_L1\_Tile|2  
AAACGGCCTGCAACTCGAAAAGTGACCAAAACTGTCAAAAGGAAAAAAGTGCAATTGTAA  
>HPV24\_Unclassified\_9628486\_nt6079\_L1\_Tile|1  
ATTATTTAACAAAGTGAATGACACAGAAAACCCTGTATCATATAGGACACAAGCATCGTC  
>HPV24\_Unclassified\_9628486\_nt6089\_L1\_Tile|1  
AAAGTGAATGACACAGAAAACCCTGTATCATATAGGACACAAGCATCGTCCACAGATGAT  
>HPV24\_Unclassified\_9628486\_nt6094\_L1\_Tile|1  
GAATGACACAGAAAACCCTGTATCATATAGGACACAAGCATCGTCCACAGATGATAGACA  
>HPV24\_Unclassified\_9628486\_nt6104\_L1\_Tile|1  
GAAAACCCTGTATCATATAGGACACAAGCATCGTCCACAGATGATAGACAAAATACCTCA  
>HPV24\_Unclassified\_9628486\_nt6204\_L1\_Tile|1  
CACCTGCATAGGAGAACATTGGGAAGTAGCTGAGAGGTGTGCTGGTGATAATAATGATG  
>HPV24\_Unclassified\_9628486\_nt6209\_L1\_Tile|1  
TGCATAGGAGAACATTGGGAAGTAGCTGAGAGGTGTGCTGGTGATAATAATGATGCTGGT  
>HPV24\_Unclassified\_9628486\_nt6214\_L1\_Tile|1  
AGGAGAACATTGGGAAGTAGCTGAGAGGTGTGCTGGTGATAATAATGATGCTGGTAGATG  
>HPV24\_Unclassified\_9628486\_nt6234\_L1\_Tile|1  
CTGAGAGGTGTGCTGGTGATAATAATGATGCTGGTAGATGTCCACCTATTAAGTTAGTAA  
>HPV24\_Unclassified\_9628486\_nt6244\_L1\_Tile|1  
TGCTGGTGATAATAATGATGCTGGTAGATGTCCACCTATTAAGTTAGTAAATTCAGTAAT  
>HPV24\_Unclassified\_9628486\_nt6249\_L1\_Tile|1  
GTGATAATAATGATGCTGGTAGATGTCCACCTATTAAGTTAGTAAATTCAGTAATTCAG  
>HPV24\_Unclassified\_9628486\_nt6254\_L1\_Tile|1  
AATAATGATGCTGGTAGATGTCCACCTATTAAGTTAGTAAATTCAGTAATTCAGATGGT  
>HPV24\_Unclassified\_9628486\_nt6324\_L1\_Tile|1  
ATATTGGTTATGGGAATTTAAATTTTAGAACACTACAACAAAGTAGATCAGACGTAAGTT  
>HPV24\_Unclassified\_9628486\_nt6329\_L1\_Tile|1

GGTTATGGGAATTTAAATTTTAGAACACTACAACAAAGTAGATCAGACGTAAGTTTGGAT  
>HPV24\_Unclassified\_9628486\_nt6334\_L1\_Tile|1  
TGGGAATTTAAATTTTAGAACACTACAACAAAGTAGATCAGACGTAAGTTTGGATATTGT  
>HPV24\_Unclassified\_9628486\_nt6339\_L1\_Tile|1  
ATTTAAATTTTAGAACACTACAACAAAGTAGATCAGACGTAAGTTTGGATATTGTAAATG  
>HPV24\_Unclassified\_9628486\_nt6344\_L1\_Tile|1  
AATTTTAGAACACTACAACAAAGTAGATCAGACGTAAGTTTGGATATTGTAAATGAAACC  
>HPV24\_Unclassified\_9628486\_nt6514\_L1\_Tile|1  
TAAACCAGGGGATGACATACCTGGTGAGCAAATTGATGCAGGGACCTACAAAATGACTT  
>HPV24\_Unclassified\_9628486\_nt6739\_L1\_Tile|1  
ATTGTTTCATTACGGTAGTAGATAACACCAGGAACACCAATTTTAGTATAAGTGTATACAC  
>HPV24\_Unclassified\_9628486\_nt6774\_L1\_Tile|1  
CCAATTTTAGTATAAGTGTATACACTGAAAATGGCAAAGTAACAGATATTAACGAGTATG  
>HPV24\_Unclassified\_9628486\_nt6779\_L1\_Tile|1  
TTTAGTATAAGTGTATACACTGAAAATGGCAAAGTAACAGATATTAACGAGTATGATGCT  
>HPV24\_Unclassified\_9628486\_nt6784\_L1\_Tile|1  
TATAAGTGTATACACTGAAAATGGCAAAGTAACAGATATTAACGAGTATGATGCTAATAA  
>HPV24\_Unclassified\_9628486\_nt6794\_L1\_Tile|1  
TACACTGAAAATGGCAAAGTAACAGATATTAACGAGTATGATGCTAATAAATTTAGGGAA  
>HPV24\_Unclassified\_9628486\_nt6799\_L1\_Tile|1  
TGAAAATGGCAAAGTAACAGATATTAACGAGTATGATGCTAATAAATTTAGGGAATATCA  
>HPV24\_Unclassified\_9628486\_nt6804\_L1\_Tile|1  
ATGGCAAAGTAACAGATATTAACGAGTATGATGCTAATAAATTTAGGGAATATCAGAGAC  
>HPV24\_Unclassified\_9628486\_nt6809\_L1\_Tile|1  
AAAGTAACAGATATTAACGAGTATGATGCTAATAAATTTAGGGAATATCAGAGACATGTA  
>HPV24\_Unclassified\_9628486\_nt6839\_L1\_Tile|1  
AATAAATTTAGGGAATATCAGAGACATGTAGAAGAGTATGAAATTTCACTTATACTGCAG  
>HPV24\_Unclassified\_9628486\_nt6844\_L1\_Tile|1  
ATTTAGGGAATATCAGAGACATGTAGAAGAGTATGAAATTTCACTTATACTGCAGCTATG  
>HPV24\_Unclassified\_9628486\_nt6854\_L1\_Tile|1  
TATCAGAGACATGTAGAAGAGTATGAAATTTCACTTATACTGCAGCTATGTAAAATCCCT  
>HPV24\_Unclassified\_9628486\_nt6864\_L1\_Tile|1  
ATGTAGAAGAGTATGAAATTTCACTTATACTGCAGCTATGTAAAATCCCTTTAAAAGCAG  
>HPV24\_Unclassified\_9628486\_nt6869\_L1\_Tile|1  
GAAGAGTATGAAATTTCACTTATACTGCAGCTATGTAAAATCCCTTTAAAAGCAGATGTG  
>HPV24\_Unclassified\_9628486\_nt6884\_L1\_Tile|1  
TCACTTATACTGCAGCTATGTAAAATCCCTTTAAAAGCAGATGTGTTAGCACAGATCAAT  
>HPV24\_Unclassified\_9628486\_nt6904\_L1\_Tile|1  
TAAAATCCCTTTAAAAGCAGATGTGTTAGCACAGATCAATGCTATGAATCCATCTCTATT  
>HPV24\_Unclassified\_9628486\_nt6989\_L1\_Tile|1  
CCTGCACCAGACAATCCTCTTCAAAGTACCTACAGATATATAGAAAGTTTGGCAACACCT  
>HPV24\_Unclassified\_9628486\_nt6994\_L1\_Tile|1  
ACCAGACAATCCTCTTCAAAGTACCTACAGATATATAGAAAGTTTGGCAACACCTTGTC  
>HPV24\_Unclassified\_9628486\_nt7119\_L1\_Tile|1  
TATCTGAACGCTTATCTTTGGAAGTGGATCAATATTCCTTAGGACGAAAGTTCCTGTTTC  
>HPV24\_Unclassified\_9628486\_nt7149\_L1\_Tile|1  
AATATTCTCTTAGGACGAAAGTTCCTGTTTCAAGCGGGTCTTGTACAAAAAACATCTAAAA  
>HPV24\_Unclassified\_9628486\_nt7154\_L1\_Tile|1  
TCCTTAGGACGAAAGTTCCTGTTTCAAGCGGGTCTTGTACAAAAAACATCTAAAAAACAA  
>HPV24\_Unclassified\_9628486\_nt7159\_L1\_Tile|1  
AGGACGAAAGTTCCTGTTTCAAGCGGGTCTTGTACAAAAAACATCTAAAAAACATCTAA  
>HPV24\_Unclassified\_9628486\_nt7164\_L1\_Tile|1  
GAAAGTTCCTGTTTCAAGCGGGTCTTGTACAAAAAACATCTAAAAAACATCTAATGTAT  
>HPV24\_Unclassified\_9628486\_nt7169\_L1\_Tile|1  
TTCCTGTTTCAAGCGGGTCTTGTACAAAAAACATCTAAAAAACATCTAATGTATCCAAG



>HPV24\_Unclassified\_9628486\_nt7174\_L1\_Tile|1  
GTTTCAAGCGGGTCTTGTACAAAAACATCTAAAAAACATCTAATGTATCCAAGGGGAC  
>HPV24\_Unclassified\_9628486\_nt7179\_L1\_Tile|1  
AAGCGGGTCTTGTACAAAAACATCTAAAAAACATCTAATGTATCCAAGGGGACCAAAC  
>HPV24\_Unclassified\_9628486\_nt7184\_L1\_Tile|1  
GGTCTTGTACAAAAACATCTAAAAAACATCTAATGTATCCAAGGGGACCAAACGAAAA  
>HPV24\_Unclassified\_9628486\_nt7193\_L1\_Tile|1  
CAAAAAACATCTAAAAAACATCTAATGTATCCAAGGGGACCAAACGAAAAACGCACGTAA  
>HPV25\_Beta\_396948\_nt6030\_L1\_Tile|1  
TCACCCATATTTTAATGTGTACAACGTCCAAGGCTCTAAATTGCAAATTCCAAAGTGTC  
>HPV25\_Beta\_396948\_nt6035\_L1\_Tile|1  
CATATTTTAATGTGTACAACGTCCAAGGCTCTAAATTGCAAATTCCAAAGTGTCAGGAA  
>HPV25\_Beta\_396948\_nt6040\_L1\_Tile|1  
TTTAATGTGTACAACGTCCAAGGCTCTAAATTGCAAATTCCAAAGTGTCAGGAAATCAA  
>HPV25\_Beta\_396948\_nt6245\_L1\_Tile|1  
TGGGTCACCCATTGTTTAACAAGGTTGGCGACACAGAAAATCCAAATCTTATAAAGCTA  
>HPV25\_Beta\_396948\_nt6250\_L1\_Tile|1  
CACCCATTGTTTAACAAGGTTGGCGACACAGAAAATCCAAATCTTATAAAGCTAGTTCT  
>HPV25\_Beta\_396948\_nt6255\_L1\_Tile|1  
ATTGTTTAACAAGGTTGGCGACACAGAAAATCCAAATCTTATAAAGCTAGTTCTACAGA  
>HPV25\_Beta\_396948\_nt6275\_L1\_Tile|1  
ACACAGAAAATCCAAATCTTATAAAGCTAGTTCTACAGATGACAGGCAAAATGTATCAT  
>HPV25\_Beta\_396948\_nt6280\_L1\_Tile|1  
GAAAATCCAAATCTTATAAAGCTAGTTCTACAGATGACAGGCAAAATGTATCATTTGAC  
>HPV25\_Beta\_396948\_nt6415\_L1\_Tile|1  
GATGATGGCAATATTCAACAAGGGTCATGCCCTCCAATAGAATTAATTAATCTGTGCATT  
>HPV25\_Beta\_396948\_nt6735\_L1\_Tile|1  
AAATGCATTTTACATACCACCTAACAGTAGTCAGGCTCAATATAATAATCTAGGTAACCTC  
>HPV25\_Beta\_396948\_nt6740\_L1\_Tile|1  
CATTTTACATACCACCTAACAGTAGTCAGGCTCAATATAATAATCTAGGTAACCTCAATGT  
>HPV25\_Beta\_396948\_nt6975\_L1\_Tile|1  
TGGAACAGATGTTTCCAAAATCACTGATTATAATTCTCAAAAATTTACAGAATATTTGAG  
>HPV25\_Beta\_396948\_nt6980\_L1\_Tile|1  
CAGATGTTTCCAAAATCACTGATTATAATTCTCAAAAATTTACAGAATATTTGAGACATG  
>HPV25\_Beta\_396948\_nt7030\_L1\_Tile|1  
TTGAGACATGTAGAAGAATATGAGTTATCATTAATATTACAACCTTTGCAAAGTACCGTTG  
>HPV25\_Beta\_396948\_nt7035\_L1\_Tile|1  
ACATGTAGAAGAATATGAGTTATCATTAATATTACAACCTTTGCAAAGTACCGTTGAAGGC  
>HPV25\_Beta\_396948\_nt7040\_L1\_Tile|1  
TAGAAGAATATGAGTTATCATTAATATTACAACCTTTGCAAAGTACCGTTGAAGGCAGAAA  
>HPV25\_Beta\_396948\_nt7045\_L1\_Tile|1  
GAATATGAGTTATCATTAATATTACAACCTTTGCAAAGTACCGTTGAAGGCAGAAATATTG  
>HPV25\_Beta\_396948\_nt7050\_L1\_Tile|1  
TGAGTTATCATTAATATTACAACCTTTGCAAAGTACCGTTGAAGGCAGAAATATTGGCTCA  
>HPV25\_Beta\_396948\_nt7065\_L1\_Tile|1  
ATTACAACCTTTGCAAAGTACCGTTGAAGGCAGAAATATTGGCTCAGATTAATGCAATGAA  
>HPV25\_Beta\_396948\_nt7070\_L1\_Tile|1  
AACTTTGCAAAGTACCGTTGAAGGCAGAAATATTGGCTCAGATTAATGCAATGAATTCCA  
>HPV25\_Beta\_396948\_nt7075\_L1\_Tile|1  
TGCAAAGTACCGTTGAAGGCAGAAATATTGGCTCAGATTAATGCAATGAATTCCAACATT  
>HPV25\_Beta\_396948\_nt7080\_L1\_Tile|1  
AGTACCGTTGAAGGCAGAAATATTGGCTCAGATTAATGCAATGAATTCCAACATTTTGA  
>HPV25\_Beta\_396948\_nt7165\_L1\_Tile|1  
GCACCGGACAATTCTATTACAGGATACTTATCGCTACATTGATTCTTTAGCCACACGTTGT  
>HPV25\_Beta\_396948\_nt7170\_L1\_Tile|1

GGACAATTCTATTCAGGATACTTATCGCTACATTGATTCTTTAGCCACACGTTGTCCAGA  
>HPV25\_Beta\_396948\_nt7175\_L1\_Tile|1  
ATTCTATTCAGGATACTTATCGCTACATTGATTCTTTAGCCACACGTTGTCCAGATAAAA  
>HPV25\_Beta\_396948\_nt7180\_L1\_Tile|1  
ATTCAGGATACTTATCGCTACATTGATTCTTTAGCCACACGTTGTCCAGATAAAAATCCT  
>HPV25\_Beta\_396948\_nt7384\_L1\_Tile|1  
ACAAAAACAGTTTCCTCCCGAATATCTACTAGGGGAATAAAAAGAAAACGTAAAAATTAG  
>HPV26\_Alpha\_9627305\_nt5944\_L1\_Tile|1  
ATCCTTTGTTTAATAAGTTGGATGATACCGAAAACCTCTCATTTGGCTACTGTAAATGCAG  
>HPV26\_Alpha\_9627305\_nt5954\_L1\_Tile|1  
TAATAAGTTGGATGATACCGAAAACCTCTCATTTGGCTACTGTAAATGCAGACACTGACAA  
>HPV26\_Alpha\_9627305\_nt5959\_L1\_Tile|1  
AGTTGGATGATACCGAAAACCTCTCATTTGGCTACTGTAAATGCAGACACTGACAACAGGG  
>HPV26\_Alpha\_9627305\_nt5964\_L1\_Tile|1  
GATGATACCGAAAACCTCTCATTTGGCTACTGTAAATGCAGACACTGACAACAGGGACAAT  
>HPV26\_Alpha\_9627305\_nt5969\_L1\_Tile|1  
TACCGAAAACCTCTCATTTGGCTACTGTAAATGCAGACACTGACAACAGGGACAATGTTTC  
>HPV26\_Alpha\_9627305\_nt5974\_L1\_Tile|1  
AAAACCTCTCATTTGGCTACTGTAAATGCAGACACTGACAACAGGGACAATGTTTCAGTTG  
>HPV26\_Alpha\_9627305\_nt5979\_L1\_Tile|1  
TCTCATTTGGCTACTGTAAATGCAGACACTGACAACAGGGACAATGTTTCAGTTGATAAT  
>HPV26\_Alpha\_9627305\_nt6059\_L1\_Tile|1  
TATAGGTTGTACACCGCCCTTGGGAGAGCACTGGGGTATTGGCACTATATGTAAAAATAC  
>HPV26\_Alpha\_9627305\_nt6094\_L1\_Tile|1  
GTATTGGCACTATATGTAAAAATACACAGACACAACGTGGGGATTGCCCCCCTTAGAAT  
>HPV26\_Alpha\_9627305\_nt6099\_L1\_Tile|1  
GGCACTATATGTAAAAATACACAGACACAACGTGGGGATTGCCCCCCTTAGAATTAATT  
>HPV26\_Alpha\_9627305\_nt6104\_L1\_Tile|1  
TATATGTAAAAATACACAGACACAACGTGGGGATTGCCCCCCTTAGAATTAATTTCCAG  
>HPV26\_Alpha\_9627305\_nt6109\_L1\_Tile|1  
GTAAAAATACACAGACACAACGTGGGGATTGCCCCCCTTAGAATTAATTTCCAGCATTA  
>HPV26\_Alpha\_9627305\_nt6114\_L1\_Tile|1  
AATACACAGACACAACGTGGGGATTGCCCCCCTTAGAATTAATTTCCAGCATTATTGAG  
>HPV26\_Alpha\_9627305\_nt6354\_L1\_Tile|1  
GCCAGACATTTTATAATAAGGCGGGGGCTGTTGGGGATGCTATACCCACCACTTTGTAT  
>HPV26\_Alpha\_9627305\_nt6359\_L1\_Tile|1  
ACATTTTTATAATAAGGCGGGGGCTGTTGGGGATGCTATACCCACCACTTTGTATATTAA  
>HPV26\_Alpha\_9627305\_nt6364\_L1\_Tile|1  
TTTATAATAAGGCGGGGGCTGTTGGGGATGCTATACCCACCACTTTGTATATTAAAGGTG  
>HPV26\_Alpha\_9627305\_nt6369\_L1\_Tile|1  
AATAAGGCGGGGGCTGTTGGGGATGCTATACCCACCACTTTGTATATTAAAGGTGCTGAA  
>HPV26\_Alpha\_9627305\_nt6379\_L1\_Tile|1  
GGGCTGTTGGGGATGCTATACCCACCACTTTGTATATTAAAGGTGCTGAATCAGGCAGGG  
>HPV26\_Alpha\_9627305\_nt6389\_L1\_Tile|1  
GGATGCTATACCCACCACTTTGTATATTAAAGGTGCTGAATCAGGCAGGGAGCCCCCTAC  
>HPV26\_Alpha\_9627305\_nt6399\_L1\_Tile|1  
CCCACCACTTTGTATATTAAAGGTGCTGAATCAGGCAGGGAGCCCCCTACATCTTCTATT  
>HPV26\_Alpha\_9627305\_nt6404\_L1\_Tile|1  
CACTTTGTATATTAAAGGTGCTGAATCAGGCAGGGAGCCCCCTACATCTTCTATTTATTC  
>HPV26\_Alpha\_9627305\_nt6409\_L1\_Tile|1  
TGTATATTAAAGGTGCTGAATCAGGCAGGGAGCCCCCTACATCTTCTATTTATTCTGCTA  
>HPV26\_Alpha\_9627305\_nt6414\_L1\_Tile|1  
ATTAAAGGTGCTGAATCAGGCAGGGAGCCCCCTACATCTTCTATTTATTCTGCTACACCT  
>HPV26\_Alpha\_9627305\_nt6719\_L1\_Tile|1  
TCAGTTGTGTAAAAATAACACTTACAACAGATGTTATGGCTTACATACATTTAATGAATGC

>HPV26\_Alpha\_9627305\_nt6724\_L1\_Tile|1  
TGTGTAAAAATAACACTTACAACAGATGTTATGGCTTACATACATTTAATGAATGCCTCCA  
>HPV26\_Alpha\_9627305\_nt6729\_L1\_Tile|1  
AAAATAACACTTACAACAGATGTTATGGCTTACATACATTTAATGAATGCCTCCATATTG  
>HPV26\_Alpha\_9627305\_nt6739\_L1\_Tile|1  
TTACAACAGATGTTATGGCTTACATACATTTAATGAATGCCTCCATATTGGAGGATTGGA  
>HPV26\_Alpha\_9627305\_nt6759\_L1\_Tile|1  
TACATACATTTAATGAATGCCTCCATATTGGAGGATTGGAATTTTGGACTAACCTTACCT  
>HPV26\_Alpha\_9627305\_nt6974\_L1\_Tile|1  
ATTTCCACTAGGGCGTAAGTTTATGTTACAGGCCGGCATACAACGGCGGCCGAACTAGG  
>HPV26\_Alpha\_9627305\_nt6979\_L1\_Tile|1  
CACTAGGGCGTAAGTTTATGTTACAGGCCGGCATACAACGGCGGCCGAACTAGGCACCA  
>HPV26\_Alpha\_9627305\_nt6984\_L1\_Tile|1  
GGGCGTAAGTTTATGTTACAGGCCGGCATACAACGGCGGCCGAACTAGGCACCAAACGT  
>HPV26\_Alpha\_9627305\_nt6989\_L1\_Tile|1  
TAAGTTTATGTTACAGGCCGGCATACAACGGCGGCCGAACTAGGCACCAAACGTCCCTT  
>HPV26\_Alpha\_9627305\_nt6994\_L1\_Tile|1  
TTATGTTACAGGCCGGCATACAACGGCGGCCGAACTAGGCACCAAACGTCCCTTATCTT  
>HPV27\_Alpha\_396964\_nt5458\_L1\_Tile|1  
GATGTCTCGCAGCCATTGGACGATTACTACCCAGCCCTCGCGGCTCCCTGGCTAATACC  
>HPV27\_Alpha\_396964\_nt5468\_L1\_Tile|1  
AGCCATTGGACGATTACTACCCAGCCCTCGCGGCTCCCTGGCTAATACCACGGTATCTG  
>HPV27\_Alpha\_396964\_nt5483\_L1\_Tile|1  
ACTACCCAGCCCTCGCGGCTCCCTGGCTAATACCACGGTATCTGCCTCCTCTGCATCTA  
>HPV27\_Alpha\_396964\_nt5513\_L1\_Tile|1  
ATACCACGGTATCTGCCTCCTCTGCATCTACACTGCGAGGGTCCACTACAGCCCTCTCT  
>HPV27\_Alpha\_396964\_nt5903\_L1\_Tile|1  
CACCCATATTATTCTATAAAGAAGGGTAGCAATAATAGGTTGGCAGTGCCTAAGGTGTCC  
>HPV27\_Alpha\_396964\_nt5918\_L1\_Tile|1  
ATAAAGAAGGGTAGCAATAATAGGTTGGCAGTGCCTAAGGTGTCCGGCTACCAATACCGT  
>HPV27\_Alpha\_396964\_nt5923\_L1\_Tile|1  
GAAGGGTAGCAATAATAGGTTGGCAGTGCCTAAGGTGTCCGGCTACCAATACCGTGTATT  
>HPV27\_Alpha\_396964\_nt6763\_L1\_Tile|1  
ACGGAGTACCAATGTCTCTCTGTGTGCAGCTGAGGTGTCTGATAATACTAATTATAAAGC  
>HPV27\_Alpha\_396964\_nt6773\_L1\_Tile|1  
AATGTCTCTCTGTGTGCAGCTGAGGTGTCTGATAATACTAATTATAAAGCTACGAATTTT  
>HPV28\_Alpha\_1020202\_nt5881\_L1\_Tile|1  
TCCTTATTTTCCCATTCCTAAATCATCCACTAACAAAGCAGATGTGCCCCAAAGTGTCCGC  
>HPV28\_Alpha\_1020202\_nt5886\_L1\_Tile|1  
ATTTTCCCATTCCTAAATCATCCACTAACAAAGCAGATGTGCCCCAAAGTGTCCGCCTTTC  
>HPV28\_Alpha\_1020202\_nt5891\_L1\_Tile|1  
CCCATTCCCTAAATCATCCACTAACAAAGCAGATGTGCCCCAAAGTGTCCGCCTTTCAGTAT  
>HPV28\_Alpha\_1020202\_nt5901\_L1\_Tile|1  
AATCATCCACTAACAAAGCAGATGTGCCCCAAAGTGTCCGCCTTTCAGTATAGGGTATTCC  
>HPV28\_Alpha\_1020202\_nt6491\_L1\_Tile|1  
AAGGAACAACCTTTTCGCTCGGCATTTTTTTAATAGAGCTGGTGTGCTGGGGACACCATT  
>HPV28\_Alpha\_1020202\_nt6521\_L1\_Tile|1  
AATAGAGCTGGTGTGCTGGGGACACCATTCTGAAACATTGTATATTAAAGGTCAGGGC  
>HPV28\_Alpha\_1020202\_nt6531\_L1\_Tile|1  
GTGTTGCTGGGGACACCATTCTGAAACATTGTATATTAAAGGTCAGGGCAACGGGAGGG  
>HPV28\_Alpha\_1020202\_nt6536\_L1\_Tile|1  
GCTGGGGACACCATTCTGAAACATTGTATATTAAAGGTCAGGGCAACGGGAGGGATGTG  
>HPV28\_Alpha\_1020202\_nt6541\_L1\_Tile|1  
GGACACCATTCTGAAACATTGTATATTAAAGGTCAGGGCAACGGGAGGGATGTGATTGG  
>HPV28\_Alpha\_1020202\_nt6546\_L1\_Tile|1

CCATTCTGAAACATTGTATATTAAAGGTCAGGGCAACGGGAGGGATGTGATTGGTAGTG  
>HPV28\_Alpha\_1020202\_nt6746\_L1\_Tile|1  
ACTACACGCAGTACAAACATGACGTTGTGTGTTTCTACTGACTCTTCAGCTACGTACGAT  
>HPV28\_Alpha\_1020202\_nt6771\_L1\_Tile|1  
TGTGTGTTTCTACTGACTCTTCAGCTACGTACGATGCTAGTAAATTTAAGGAATACTTAA  
>HPV28\_Alpha\_1020202\_nt6776\_L1\_Tile|1  
GTTTCTACTGACTCTTCAGCTACGTACGATGCTAGTAAATTTAAGGAATACTTAAAGGCAC  
>HPV28\_Alpha\_1020202\_nt6791\_L1\_Tile|1  
TCAGCTACGTACGATGCTAGTAAATTTAAGGAATACTTAAAGGCACGGGGAGGAGTACGAT  
>HPV28\_Alpha\_1020202\_nt6796\_L1\_Tile|1  
TACGTACGATGCTAGTAAATTTAAGGAATACTTAAAGGCACGGGGAGGAGTACGATTTGCA  
>HPV28\_Alpha\_1020202\_nt7086\_L1\_Tile|1  
ATCTTAAGGATCGCTTTTCTCTTGATCTATCGCAATCCCTCTGGGAAGGAAATTTTAA  
>HPV28\_Alpha\_1020202\_nt7106\_L1\_Tile|1  
CTTGATCTATCGCAATCCCTCTGGGAAGGAAATTTTAAATGCAGTTGGGTGTAGGTGCC  
>HPV28\_Alpha\_1020202\_nt7156\_L1\_Tile|1  
TGTAGGTGCCCCGCTCCAGTGTCTCCGTTTCGCAACGTCCAGCGTCCACCACGAGAGGATC  
>HPV28\_Alpha\_1020202\_nt7186\_L1\_Tile|1  
CAAACGTCCAGCGTCCACCACGAGAGGATCGTCTGCTGCAAAACGAAAACGCGCCAAAAA  
>HPV29\_Alpha\_1020210\_nt6329\_L1\_Tile|1  
CACTGTGTGTGCACGCACTAGTTCCGCTGCTGGTGATTGCCCCCCCCCTGGAGTTAATGAC  
>HPV29\_Alpha\_1020210\_nt6334\_L1\_Tile|1  
TGTGTGCACGCACTAGTTCCGCTGCTGGTGATTGCCCCCCCCCTGGAGTTAATGACCACAC  
>HPV29\_Alpha\_1020210\_nt6339\_L1\_Tile|1  
GCACGCACTAGTTCCGCTGCTGGTGATTGCCCCCCCCCTGGAGTTAATGACCACACATATT  
>HPV29\_Alpha\_1020210\_nt6579\_L1\_Tile|1  
TTTGCCAGGCACTTCTTTAATCGTGCTGGTGCTAGTAGGGGACAAAATCCCAGATTCCTTG  
>HPV29\_Alpha\_1020210\_nt6584\_L1\_Tile|1  
CAGGCACTTCTTTAATCGTGCTGGTGCTAGTAGGGGACAAAATCCCAGATTCCTTGCTACTT  
>HPV29\_Alpha\_1020210\_nt6594\_L1\_Tile|1  
TTTAATCGTGCTGGTGCTAGTAGGGGACAAAATCCCAGATTCCTTGCTACTTAAAGGGTAAC  
>HPV29\_Alpha\_1020210\_nt6599\_L1\_Tile|1  
TCGTGCTGGTGCTAGTAGGGGACAAAATCCCAGATTCCTTGCTACTTAAAGGGTAACAACGG  
>HPV29\_Alpha\_1020210\_nt6604\_L1\_Tile|1  
CTGGTGCTAGTAGGGGACAAAATCCCAGATTCCTTGCTACTTAAAGGGTAACAACGGGCGAG  
>HPV29\_Alpha\_1020210\_nt6609\_L1\_Tile|1  
GTAGTAGGGGACAAAATCCCAGATTCCTTGCTACTTAAAGGGTAACAACGGGCGAGAAACT  
>HPV29\_Alpha\_1020210\_nt6614\_L1\_Tile|1  
AGGGGACAAAATCCCAGATTCCTTGCTACTTAAAGGGTAACAACGGGCGAGAAACTCCTGG  
>HPV29\_Alpha\_1020210\_nt6624\_L1\_Tile|1  
ATCCCAGATTCCTTGCTACTTAAAGGGTAACAACGGGCGAGAAACTCCTGGCAGTGCCATA  
>HPV29\_Alpha\_1020210\_nt6629\_L1\_Tile|1  
AGATTCTTGCTACTTAAAGGGTAACAACGGGCGAGAAACTCCTGGCAGTGCCATATACAG  
>HPV29\_Alpha\_1020210\_nt6829\_L1\_Tile|1  
GCACCAATATGTCGTTGTGTGCTACCACAGAGTCTCAACCGTTGACCACTTATGATGCTA  
>HPV29\_Alpha\_1020210\_nt6834\_L1\_Tile|1  
AATATGTCGTTGTGTGCTACCACAGAGTCTCAACCGTTGACCACTTATGATGCTACCAAG  
>HPV29\_Alpha\_1020210\_nt6844\_L1\_Tile|1  
TGTGTGCTACCACAGAGTCTCAACCGTTGACCACTTATGATGCTACCAAGATTAAAGAAT  
>HPV29\_Alpha\_1020210\_nt6849\_L1\_Tile|1  
GCTACCACAGAGTCTCAACCGTTGACCACTTATGATGCTACCAAGATTAAAGAATATTTG  
>HPV29\_Alpha\_1020210\_nt6854\_L1\_Tile|1  
CACAGAGTCTCAACCGTTGACCACTTATGATGCTACCAAGATTAAAGAATATTTGAGACA  
>HPV29\_Alpha\_1020210\_nt6859\_L1\_Tile|1  
AGTCTCAACCGTTGACCACTTATGATGCTACCAAGATTAAAGAATATTTGAGACATGGGG

>HPV29\_Alpha\_1020210\_nt6959\_L1\_Tile|1  
TACATTGACACCTGAAATTATGGCTTACCTTCATACTATGAACAGTGCCTTACTTGAAGA  
>HPV29\_Alpha\_1020210\_nt6984\_L1\_Tile|1  
TACCTTCATACTATGAACAGTGCCTTACTTGAAGACTGGAATTTTGGATTGACATTGCCA  
>HPV29\_Alpha\_1020210\_nt7224\_L1\_Tile|1  
TTACAGATCGGTGCGCGCCGGCGTTCAGTAGTCCCCTCCAGAAAGCGCCGAACGACCACC  
>HPV29\_Alpha\_1020210\_nt7229\_L1\_Tile|1  
GATCGGTGCGCGCCGGCGTTCAGTAGTCCCCTCCAGAAAGCGCCGAACGACCACCACGGC  
>HPV29\_Alpha\_1020210\_nt7249\_L1\_Tile|1  
CAGTAGTCCCCTCCAGAAAGCGCCGAACGACCACCACGGCCCCCACCCTGCAAAGCGAA  
>HPV29\_Alpha\_1020210\_nt7254\_L1\_Tile|1  
GTCCCCTCCAGAAAGCGCCGAACGACCACCACGGCCCCCACCCTGCAAAGCGAAAACGC  
>HPV29\_Alpha\_1020210\_nt7259\_L1\_Tile|1  
CTCCAGAAAGCGCCGAACGACCACCACGGCCCCCACCCTGCAAAGCGAAAACGCTCGAA  
>HPV30\_Alpha\_396973\_nt5772\_L1\_Tile|1  
ACGTTTGCTTGCTGTTGGACATCCATATTATTCTATTTCTAAGGCTGGTAATTCCAAAAC  
>HPV30\_Alpha\_396973\_nt5777\_L1\_Tile|1  
TGCTTGCTGTTGGACATCCATATTATTCTATTTCTAAGGCTGGTAATTCCAAAACAGATG  
>HPV30\_Alpha\_396973\_nt6032\_L1\_Tile|1  
ATGACACTGAAAGTTCCACTATAGCTAATCAGGATACAGCAGAGGATAGTAGGGACAACA  
>HPV30\_Alpha\_396973\_nt6037\_L1\_Tile|1  
ACTGAAAGTTCCACTATAGCTAATCAGGATACAGCAGAGGATAGTAGGGACAACATTTCT  
>HPV30\_Alpha\_396973\_nt6042\_L1\_Tile|2  
AAGTTCCACTATAGCTAATCAGGATACAGCAGAGGATAGTAGGGACAACATTTCTGTTGA  
>HPV30\_Alpha\_396973\_nt6047\_L1\_Tile|1  
CCACTATAGCTAATCAGGATACAGCAGAGGATAGTAGGGACAACATTTCTGTTGATCCAA  
>HPV30\_Alpha\_396973\_nt6087\_L1\_Tile|1  
CAACATTTCTGTTGATCCAAAGCAAACCCAATTGTGTATTATTGGGTGCACTCCTGCTAT  
>HPV30\_Alpha\_396973\_nt6092\_L1\_Tile|1  
TTTCTGTTGATCCAAAGCAAACCCAATTGTGTATTATTGGGTGCACTCCTGCTATAGGAG  
>HPV30\_Alpha\_396973\_nt6097\_L1\_Tile|1  
GTTGATCCAAAGCAAACCCAATTGTGTATTATTGGGTGCACTCCTGCTATAGGAGAACAT  
>HPV30\_Alpha\_396973\_nt6412\_L1\_Tile|1  
CAGTTATTTGCTAGGCACTACTTTAATAGGGCAGGTGCTATTGGTGAACAATTACCTAGC  
>HPV30\_Alpha\_396973\_nt6447\_L1\_Tile|1  
TGCTATTGGTGAACAATTACCTAGCACATTATATATAAAAGGTACAAATAACAGGGATCC  
>HPV30\_Alpha\_396973\_nt6457\_L1\_Tile|1  
GAACAATTACCTAGCACATTATATATAAAAAGGTACAAATAACAGGGATCCCCCGCCAAGC  
>HPV30\_Alpha\_396973\_nt6462\_L1\_Tile|2  
ATTACCTAGCACATTATATATAAAAAGGTACAAATAACAGGGATCCCCCGCCAAGCTCAGT  
>HPV30\_Alpha\_396973\_nt6467\_L1\_Tile|1  
CTAGCACATTATATATAAAAAGGTACAAATAACAGGGATCCCCCGCCAAGCTCAGTATATG  
>HPV30\_Alpha\_396973\_nt6472\_L1\_Tile|1  
ACATTATATATAAAAAGGTACAAATAACAGGGATCCCCCGCCAAGCTCAGTATATGTTGCT  
>HPV30\_Alpha\_396973\_nt6482\_L1\_Tile|2  
TAAAAGGTACAAATAACAGGGATCCCCCGCCAAGCTCAGTATATGTTGCTACTCCTAGTG  
>HPV30\_Alpha\_396973\_nt6822\_L1\_Tile|2  
ACATACTATGAACTCCACTTTACTTGAGGGCTGGAATATTGGATTGTCACCCCCAGCTGC  
>HPV30\_Alpha\_396973\_nt6832\_L1\_Tile|1  
AACTCCACTTTACTTGAGGGCTGGAATATTGGATTGTCACCCCCAGCTGCCACAAGCTTA  
>HPV30\_Alpha\_396973\_nt7022\_L1\_Tile|2  
ACCTTGACCAATTCCCCTGAGGAGAAAGTTTTTAATGCAACTTGGGGTTCGTACTAAAC  
>HPV30\_Alpha\_396973\_nt7032\_L1\_Tile|1  
ATTCCCACTGGGCAGAAAGTTTTTAATGCAACTTGGGGTTCGTACTAAACCTTCTACTAC  
>HPV30\_Alpha\_396973\_nt7077\_L1\_Tile|1

TAAACCTTCTACTACTACTAAAAACGCTCGGCCCCCAGTTCCTCTACCTCTACACCATC  
>HPV30\_Alpha\_396973\_nt7092\_L1\_Tile|1  
TACTAAAAACGCTCGGCCCCCAGTTCCTCTACCTCTACACCATCAGCCAAACGCAAGCG  
>HPV31\_Alpha\_333048\_nt5633\_L1\_Tile|1  
TGTAACACGAACCAACATATATTATCACGCAGGCAGTGCTAGGCTGCTTACAGTAGGCCA  
>HPV31\_Alpha\_333048\_nt5668\_L1\_Tile|1  
GTGCTAGGCTGCTTACAGTAGGCCATCCATATTATTCCATACCTAAATCTGACAATCCTA  
>HPV31\_Alpha\_333048\_nt5673\_L1\_Tile|1  
AGGCTGCTTACAGTAGGCCATCCATATTATTCCATACCTAAATCTGACAATCCTAAAAAA  
>HPV31\_Alpha\_333048\_nt5678\_L1\_Tile|1  
GCTTACAGTAGGCCATCCATATTATTCCATACCTAAATCTGACAATCCTAAAAAAATAGT  
>HPV31\_Alpha\_333048\_nt5683\_L1\_Tile|1  
CAGTAGGCCATCCATATTATTCCATACCTAAATCTGACAATCCTAAAAAAATAGTTGTAC  
>HPV31\_Alpha\_333048\_nt5688\_L1\_Tile|1  
GGCCATCCATATTATTCCATACCTAAATCTGACAATCCTAAAAAAATAGTTGTACCAAAG  
>HPV31\_Alpha\_333048\_nt5693\_L1\_Tile|1  
TCCATATTATTCCATACCTAAATCTGACAATCCTAAAAAAATAGTTGTACCAAAGGTGTC  
>HPV31\_Alpha\_333048\_nt5938\_L1\_Tile|1  
ACACTGAAAACCTCTAATAGATATGCCGGTGGTCCTGGCACTGATAATAGGGAATGTATAT  
>HPV31\_Alpha\_333048\_nt5943\_L1\_Tile|1  
GAAAACCTCTAATAGATATGCCGGTGGTCCTGGCACTGATAATAGGGAATGTATATCAATG  
>HPV31\_Alpha\_333048\_nt6028\_L1\_Tile|1  
TACTTGGTTGCAAACCACCTATTGGAGAGCATTGGGGTAAAGGTAGTCCTTGTAGTAACA  
>HPV31\_Alpha\_333048\_nt6033\_L1\_Tile|1  
GGTTGCAAACCACCTATTGGAGAGCATTGGGGTAAAGGTAGTCCTTGTAGTAACAATGCT  
>HPV31\_Alpha\_333048\_nt6038\_L1\_Tile|1  
CAAACCACCTATTGGAGAGCATTGGGGTAAAGGTAGTCCTTGTAGTAACAATGCTATTAC  
>HPV31\_Alpha\_333048\_nt6043\_L1\_Tile|1  
CACCTATTGGAGAGCATTGGGGTAAAGGTAGTCCTTGTAGTAACAATGCTATTACCCCTG  
>HPV31\_Alpha\_333048\_nt6063\_L1\_Tile|1  
GGTAAAGGTAGTCCTTGTAGTAACAATGCTATTACCCCTGGTGATTGTCCTCCATTAGAA  
>HPV31\_Alpha\_333048\_nt6338\_L1\_Tile|1  
TAATAGATCAGGCACGGTTGGTGAATCGGTCCCTACTGACTTATATATTAAAGGCTCCGG  
>HPV31\_Alpha\_333048\_nt6353\_L1\_Tile|1  
GGTTGGTGAATCGGTCCCTACTGACTTATATATTAAAGGCTCCGGTTCAACAGCTACTTT  
>HPV31\_Alpha\_333048\_nt6358\_L1\_Tile|1  
GTGAATCGGTCCCTACTGACTTATATATTAAAGGCTCCGGTTCAACAGCTACTTTAGCTA  
>HPV31\_Alpha\_333048\_nt6368\_L1\_Tile|1  
CCCTACTGACTTATATATTAAAGGCTCCGGTTCAACAGCTACTTTAGCTAACAGTACATA  
>HPV31\_Alpha\_333048\_nt6373\_L1\_Tile|1  
CTGACTTATATATTAAAGGCTCCGGTTCAACAGCTACTTTAGCTAACAGTACATACTTTC  
>HPV31\_Alpha\_333048\_nt6378\_L1\_Tile|1  
TTATATATTAAAGGCTCCGGTTCAACAGCTACTTTAGCTAACAGTACATACTTTCCTACA  
>HPV31\_Alpha\_333048\_nt6383\_L1\_Tile|1  
TATTAAAGGCTCCGGTTCAACAGCTACTTTAGCTAACAGTACATACTTTCCTACACCTAG  
>HPV31\_Alpha\_333048\_nt6393\_L1\_Tile|1  
TCCGGTTCAACAGCTACTTTAGCTAACAGTACATACTTTCCTACACCTAGCGGCTCCATG  
>HPV31\_Alpha\_333048\_nt6398\_L1\_Tile|1  
TTCAACAGCTACTTTAGCTAACAGTACATACTTTCCTACACCTAGCGGCTCCATGGTTAC  
>HPV31\_Alpha\_333048\_nt6403\_L1\_Tile|1  
CAGCTACTTTAGCTAACAGTACATACTTTCCTACACCTAGCGGCTCCATGGTTACTTCAG  
>HPV31\_Alpha\_333048\_nt6568\_L1\_Tile|1  
GTAGTACCAATATGTCTGTTTGTGCTGCAATTGCAAACAGTGATACTACATTTAAAAGTA  
>HPV31\_Alpha\_333048\_nt6573\_L1\_Tile|1  
ACCAATATGTCTGTTTGTGCTGCAATTGCAAACAGTGATACTACATTTAAAAGTAGTAAT

>HPV31\_Alpha\_333048\_nt6578\_L1\_Tile|1  
TATGTCTGTTTGTGCTGCAATTGCAAACAGTGATACTACATTTAAAAGTAGTAATTTTAA  
>HPV31\_Alpha\_333048\_nt6588\_L1\_Tile|1  
TGTGCTGCAATTGCAAACAGTGATACTACATTTAAAAGTAGTAATTTTAAAGAGTATTTA  
>HPV31\_Alpha\_333048\_nt6593\_L1\_Tile|1  
TGCAATTGCAAACAGTGATACTACATTTAAAAGTAGTAATTTTAAAGAGTATTTAAGACA  
>HPV31\_Alpha\_333048\_nt6768\_L1\_Tile|1  
GGATTGACCACACCTCCCTCAGGTTCTTTGGAGGATACCTATAGGTTTGTCCACCTCACAG  
>HPV31\_Alpha\_333048\_nt6828\_L1\_Tile|1  
GCCATTACATGTCAAAAACTGCCCCCAAGCCCAAGGAAGATCCATTTAAAGATTAT  
>HPV31\_Alpha\_333048\_nt6948\_L1\_Tile|1  
GGTCGCAAAATTTTATTACAGGCAGGATATAGGGCACGTCCTAAATTTAAAGCAGGTAAA  
>HPV31\_Alpha\_333048\_nt6953\_L1\_Tile|1  
CAAATTTTATTACAGGCAGGATATAGGGCACGTCCTAAATTTAAAGCAGGTAAACGTAG  
>HPV31\_Alpha\_333048\_nt6958\_L1\_Tile|1  
TTTTATTACAGGCAGGATATAGGGCACGTCCTAAATTTAAAGCAGGTAAACGTAGTGCAC  
>HPV31\_Alpha\_333048\_nt6963\_L1\_Tile|1  
TTACAGGCAGGATATAGGGCACGTCCTAAATTTAAAGCAGGTAAACGTAGTGCACCCTCA  
>HPV31\_Alpha\_333048\_nt6973\_L1\_Tile|1  
GATATAGGGCACGTCCTAAATTTAAAGCAGGTAAACGTAGTGCACCCTCAGCATCTACCA  
>HPV31\_Alpha\_333048\_nt6983\_L1\_Tile|1  
ACGTCCTAAATTTAAAGCAGGTAAACGTAGTGCACCCTCAGCATCTACCACTACACCAGC  
>HPV31\_Alpha\_333048\_nt6988\_L1\_Tile|1  
CTAAATTTAAAGCAGGTAAACGTAGTGCACCCTCAGCATCTACCACTACACCAGCAAAAC  
>HPV31\_Alpha\_333048\_nt7003\_L1\_Tile|1  
GTAAACGTAGTGCACCCTCAGCATCTACCACTACACCAGCAAAACGTAAAAAACTAAAA  
>HPV32\_Alpha\_9627327\_nt5988\_L1\_Tile|1  
GTTCTAGGCTTTTGGCTGTTGGGCATCCATATTATACTATTAAGAAGACACCCAATAGAA  
>HPV32\_Alpha\_9627327\_nt5993\_L1\_Tile|1  
AGGCTTTTGGCTGTTGGGCATCCATATTATACTATTAAGAAGACACCCAATAGAACATCT  
>HPV32\_Alpha\_9627327\_nt5998\_L1\_Tile|1  
TTTGGCTGTTGGGCATCCATATTATACTATTAAGAAGACACCCAATAGAACATCTATTCC  
>HPV32\_Alpha\_9627327\_nt6003\_L1\_Tile|1  
CTGTTGGGCATCCATATTATACTATTAAGAAGACACCCAATAGAACATCTATTCCAAAGG  
>HPV32\_Alpha\_9627327\_nt6008\_L1\_Tile|1  
GGGCATCCATATTATACTATTAAGAAGACACCCAATAGAACATCTATTCCAAAGGTGTCT  
>HPV32\_Alpha\_9627327\_nt6013\_L1\_Tile|1  
TCCATATTATACTATTAAGAAGACACCCAATAGAACATCTATTCCAAAGGTGTCTGGATT  
>HPV32\_Alpha\_9627327\_nt6018\_L1\_Tile|1  
ATTATACTATTAAGAAGACACCCAATAGAACATCTATTCCAAAGGTGTCTGGATTGCAGT  
>HPV32\_Alpha\_9627327\_nt6023\_L1\_Tile|1  
ACTATTAAGAAGACACCCAATAGAACATCTATTCCAAAGGTGTCTGGATTGCAGTATAGA  
>HPV32\_Alpha\_9627327\_nt6038\_L1\_Tile|1  
CCCAATAGAACATCTATTCCAAAGGTGTCTGGATTGCAGTATAGAGTATTTAGGGTTAGG  
>HPV32\_Alpha\_9627327\_nt6263\_L1\_Tile|1  
GGGCCTAGATATGCTGCAGGGCCTGGAAGTATAAGAGAAAATGTATCTATGGATTGT  
>HPV32\_Alpha\_9627327\_nt6338\_L1\_Tile|1  
TGTTTGGTGGGTTGTAAACCTGCCATTGGCGAGCATTGGGGTAAGGGTGCTGCTTGCTCT  
>HPV32\_Alpha\_9627327\_nt6358\_L1\_Tile|1  
TGCCATTGGCGAGCATTGGGGTAAGGGTGCTGCTTGCTCTGCACAATCAAATGGCGACTG  
>HPV32\_Alpha\_9627327\_nt6378\_L1\_Tile|1  
GTAAGGGTGCTGCTTGCTCTGCACAATCAAATGGCGACTGCCACCTTTGGAATTACAAA  
>HPV32\_Alpha\_9627327\_nt6453\_L1\_Tile|1  
ATGGTGATATGGCAGATGTAGGGTTTGGAGCAATGGACTTTAGTGCTTTGCAAACCTCAA  
>HPV32\_Alpha\_9627327\_nt6458\_L1\_Tile|1

GATATGGCAGATGTAGGGTTTGGAGCAATGGACTTTAGTGCTTTGCAAACCTTCAAAAGCT  
>HPV32\_Alpha\_9627327\_nt6483\_L1\_Tile|1  
CAATGGACTTTAGTGCTTTGCAAACCTTCAAAAGCTGAGGTGCCATTAGATATTATGAACT  
>HPV32\_Alpha\_9627327\_nt6488\_L1\_Tile|1  
GACTTTAGTGCTTTGCAAACCTTCAAAAGCTGAGGTGCCATTAGATATTATGAACTCCATT  
>HPV32\_Alpha\_9627327\_nt6648\_L1\_Tile|1  
ATAGGGCAGGAACCCCTTGGTGAACCTGTTCCCTGAGGACATGTATATAAAAGCTTCTAATG  
>HPV32\_Alpha\_9627327\_nt6653\_L1\_Tile|1  
GCAGGAACCCCTTGGTGAACCTGTTCCCTGAGGACATGTATATAAAAGCTTCTAATGGTGCT  
>HPV32\_Alpha\_9627327\_nt6658\_L1\_Tile|1  
AACCCTTGGTGAACCTGTTCCCTGAGGACATGTATATAAAAGCTTCTAATGGTGCTTCTGG  
>HPV32\_Alpha\_9627327\_nt6668\_L1\_Tile|1  
GAACCTGTTCCCTGAGGACATGTATATAAAAGCTTCTAATGGTGCTTCTGGCAGAAATAAT  
>HPV32\_Alpha\_9627327\_nt6673\_L1\_Tile|1  
TGTTCCCTGAGGACATGTATATAAAAGCTTCTAATGGTGCTTCTGGCAGAAATAATTTAGC  
>HPV32\_Alpha\_9627327\_nt6678\_L1\_Tile|1  
CTGAGGACATGTATATAAAAGCTTCTAATGGTGCTTCTGGCAGAAATAATTTAGCTAGTA  
>HPV32\_Alpha\_9627327\_nt6683\_L1\_Tile|1  
GACATGTATATAAAAGCTTCTAATGGTGCTTCTGGCAGAAATAATTTAGCTAGTAGTATT  
>HPV32\_Alpha\_9627327\_nt6888\_L1\_Tile|1  
GTACTAACATGACTGTGTGTGCTACTGTAACAACCTGAAGACACATACAAGTCTACTAACT  
>HPV32\_Alpha\_9627327\_nt6893\_L1\_Tile|1  
AACATGACTGTGTGTGCTACTGTAACAACCTGAAGACACATACAAGTCTACTAACTTTAAG  
>HPV32\_Alpha\_9627327\_nt6898\_L1\_Tile|1  
GACTGTGTGTGCTACTGTAACAACCTGAAGACACATACAAGTCTACTAACTTTAAGGAATA  
>HPV32\_Alpha\_9627327\_nt6903\_L1\_Tile|1  
TGTGTGCTACTGTAACAACCTGAAGACACATACAAGTCTACTAACTTTAAGGAATATCTAC  
>HPV32\_Alpha\_9627327\_nt6908\_L1\_Tile|1  
GCTACTGTAACAACCTGAAGACACATACAAGTCTACTAACTTTAAGGAATATCTACGCCAT  
>HPV32\_Alpha\_9627327\_nt7008\_L1\_Tile|1  
AAATTACATTATCTGTAGAGTTATGTCATATATCCACACCATGAATCCTGACATACTAG  
>HPV32\_Alpha\_9627327\_nt7038\_L1\_Tile|1  
ATATCCACACCATGAATCCTGACATACTAGACGATTGGAATGTTGGTGTAGCTCCACCGC  
>HPV32\_Alpha\_9627327\_nt7113\_L1\_Tile|1  
AAGATAGTTATAGATTTGTGCAGTCTCAGGCCATACGATGTCAAGCTAAGGTAACAGCAC  
>HPV32\_Alpha\_9627327\_nt7273\_L1\_Tile|1  
TTTACTGCAAGCTGGGTTACGTGCAAGACCTAAACTTACAGCAGTAAAACGAACAGCATC  
>HPV32\_Alpha\_9627327\_nt7278\_L1\_Tile|1  
TGCAAGCTGGGTTACGTGCAAGACCTAAACTTACAGCAGTAAAACGAACAGCATCTTCCA  
>HPV32\_Alpha\_9627327\_nt7283\_L1\_Tile|1  
GCTGGGTTACGTGCAAGACCTAAACTTACAGCAGTAAAACGAACAGCATCTTCCAGTCAA  
>HPV32\_Alpha\_9627327\_nt7288\_L1\_Tile|1  
GTTACGTGCAAGACCTAAACTTACAGCAGTAAAACGAACAGCATCTTCCAGTCAAAAGTC  
>HPV32\_Alpha\_9627327\_nt7298\_L1\_Tile|1  
AGACCTAAACTTACAGCAGTAAAACGAACAGCATCTTCCAGTCAAAAGTCTTCTTCTCCT  
>HPV32\_Alpha\_9627327\_nt7325\_L1\_Tile|1  
ACAGCATCTTCCAGTCAAAAGTCTTCTTCTCCTGCAAAACGCAGAAAAACACGTAAATAA  
>HPV33\_Alpha\_333049\_nt5725\_L1\_Tile|1  
CTGTTGGCCATCCATATTTTTCTATTAAAAATCCTACTAACGCTAAAAAATTATTGGTAC  
>HPV33\_Alpha\_333049\_nt5730\_L1\_Tile|1  
GGCCATCCATATTTTTCTATTAAAAATCCTACTAACGCTAAAAAATTATTGGTACCCAAA  
>HPV33\_Alpha\_333049\_nt5735\_L1\_Tile|1  
TCCATATTTTTCTATTAAAAATCCTACTAACGCTAAAAAATTATTGGTACCCAAAGTATC  
>HPV33\_Alpha\_333049\_nt5740\_L1\_Tile|1  
ATTTTTCTATTAAAAATCCTACTAACGCTAAAAAATTATTGGTACCCAAAGTATCAGGCT



>HPV33\_Alpha\_333049\_nt5745\_L1\_Tile|1  
TCTATTAAAAATCCTACTAACGCTAAAAAATTATTGGTACCCAAAGTATCAGGCTTGCAA  
>HPV33\_Alpha\_333049\_nt5750\_L1\_Tile|1  
TAAAAATCCTACTAACGCTAAAAAATTATTGGTACCCAAAGTATCAGGCTTGCAATATAG  
>HPV33\_Alpha\_333049\_nt6385\_L1\_Tile|1  
CTGGTACATTAGGAGAGGCTGTTCCCGATGACCTGTACATTAAAGGTTTCAGGAACACTACTG  
>HPV33\_Alpha\_333049\_nt6390\_L1\_Tile|1  
ACATTAGGAGAGGCTGTTCCCGATGACCTGTACATTAAAGGTTTCAGGAACACTACTGCCTCT  
>HPV33\_Alpha\_333049\_nt6395\_L1\_Tile|1  
AGGAGAGGCTGTTCCCGATGACCTGTACATTAAAGGTTTCAGGAACACTACTGCCTCTATTCA  
>HPV33\_Alpha\_333049\_nt6400\_L1\_Tile|1  
AGGCTGTTCCCGATGACCTGTACATTAAAGGTTTCAGGAACACTACTGCCTCTATTCAAAGCA  
>HPV33\_Alpha\_333049\_nt6405\_L1\_Tile|1  
GTTCCCGATGACCTGTACATTAAAGGTTTCAGGAACACTACTGCCTCTATTCAAAGCAGTGCT  
>HPV33\_Alpha\_333049\_nt6865\_L1\_Tile|1  
CTATTACGTGTCAAAAAACAGTACCTCCAAAGGAAAAGGAAGACCCCTTAGGTAAATATA  
>HPV33\_Alpha\_333049\_nt6995\_L1\_Tile|1  
TTTATTACAGGCAGGTCTTAAAGCAAAACCTAAACTTAAACGTGCAGCCCCCACATCCAC  
>HPV33\_Alpha\_333049\_nt7000\_L1\_Tile|1  
TACAGGCAGGTCTTAAAGCAAAACCTAAACTTAAACGTGCAGCCCCCACATCCACCCGCA  
>HPV33\_Alpha\_333049\_nt7010\_L1\_Tile|1  
TCTTAAAGCAAAACCTAAACTTAAACGTGCAGCCCCCACATCCACCCGCACATCGTCTGC  
>HPV34\_Alpha\_9627334\_nt5616\_L1\_Tile|1  
TAGTACACGCTTGCTGGCAGTAGGACATCCCTATTATCCTATAAAAGGATACTAATGGGAA  
>HPV34\_Alpha\_9627334\_nt5626\_L1\_Tile|1  
TTGCTGGCAGTAGGACATCCCTATTATCCTATAAAAGGATACTAATGGGAAACGTAAGATT  
>HPV34\_Alpha\_9627334\_nt5631\_L1\_Tile|1  
GGCAGTAGGACATCCCTATTATCCTATAAAAGGATACTAATGGGAAACGTAAGATTGCTGT  
>HPV34\_Alpha\_9627334\_nt5636\_L1\_Tile|1  
TAGGACATCCCTATTATCCTATAAAAGGATACTAATGGGAAACGTAAGATTGCTGTACCTA  
>HPV34\_Alpha\_9627334\_nt5646\_L1\_Tile|1  
CTATTATCCTATAAAAGGATACTAATGGGAAACGTAAGATTGCTGTACCTAAAGTTTCAGG  
>HPV34\_Alpha\_9627334\_nt5866\_L1\_Tile|1  
CCTTTTATGAATAAACTTGAGGATACTGAAAATGCTGCAAAATATATTGGTGGAACATA  
>HPV34\_Alpha\_9627334\_nt5876\_L1\_Tile|1  
ATAAACTTGAGGATACTGAAAATGCTGCAAAATATATTGGTGGAACATAGCAGATAGTA  
>HPV34\_Alpha\_9627334\_nt5881\_L1\_Tile|1  
CTTGAGGATACTGAAAATGCTGCAAAATATATTGGTGGAACATAGCAGATAGTAGGGAG  
>HPV34\_Alpha\_9627334\_nt5886\_L1\_Tile|1  
GGATACTGAAAATGCTGCAAAATATATTGGTGGAACATAGCAGATAGTAGGGAGTGTAT  
>HPV34\_Alpha\_9627334\_nt5901\_L1\_Tile|1  
TGCAAAATATATTGGTGGAACATAGCAGATAGTAGGGAGTGTATGTCAGTAGATTATAA  
>HPV34\_Alpha\_9627334\_nt6011\_L1\_Tile|1  
GGGGTACAGGCACACCATGTGGTACCCAAAATGCTGGGGAATGTCCTCCGCTTGAATTAA  
>HPV34\_Alpha\_9627334\_nt6016\_L1\_Tile|1  
ACAGGCACACCATGTGGTACCCAAAATGCTGGGGAATGTCCTCCGCTTGAATTAAAGAAC  
>HPV34\_Alpha\_9627334\_nt6026\_L1\_Tile|1  
CATGTGGTACCCAAAATGCTGGGGAATGTCCTCCGCTTGAATTAAAGAACACCACCTATAC  
>HPV34\_Alpha\_9627334\_nt6266\_L1\_Tile|1  
TTGTTAGACACCTATTTAACAGGGCAGGTACTGTAGGCGATGCTATTCCAGATGACTTAA  
>HPV34\_Alpha\_9627334\_nt6276\_L1\_Tile|1  
CCTATTTAACAGGGCAGGTACTGTAGGCGATGCTATTCCAGATGACTTAATGATTAAGGG  
>HPV34\_Alpha\_9627334\_nt6281\_L1\_Tile|1  
TTAACAGGGCAGGTACTGTAGGCGATGCTATTCCAGATGACTTAATGATTAAGGGTACAG  
>HPV34\_Alpha\_9627334\_nt6506\_L1\_Tile|1

CTACTAGAAGCACAACTTTTCAGTTTGTGTAGGTACACAATCCACAAGTACAACCTGCAC  
>HPV34\_Alpha\_9627334\_nt6511\_L1\_Tile|1  
AGAAGCACAACTTTTCAGTTTGTGTAGGTACACAATCCACAAGTACAACCTGCACCATAT  
>HPV34\_Alpha\_9627334\_nt6516\_L1\_Tile|1  
CACAACTTTTCAGTTTGTGTAGGTACACAATCCACAAGTACAACCTGCACCATATGCAAA  
>HPV34\_Alpha\_9627334\_nt6536\_L1\_Tile|1  
TAGGTACACAATCCACAAGTACAACCTGCACCATATGCAAACAGTAATTTTAAGGAATACC  
>HPV34\_Alpha\_9627334\_nt6541\_L1\_Tile|1  
ACACAATCCACAAGTACAACCTGCACCATATGCAAACAGTAATTTTAAGGAATACCTCAGA  
>HPV34\_Alpha\_9627334\_nt6546\_L1\_Tile|1  
ATCCACAAGTACAACCTGCACCATATGCAAACAGTAATTTTAAGGAATACCTCAGACATGC  
>HPV34\_Alpha\_9627334\_nt6936\_L1\_Tile|1  
TCCTAGGTTACAGGCCTCTAAACGGTCTGCACCTTCATCATCTAGTACAGCACCTAAGAA  
>HPV35\_Alpha\_333050\_nt5690\_L1\_Tile|1  
GTTCTAGGCTATTAGCTGTGGGTCACCCATACTATGCTATTAAAAACAAGATTCTAATA  
>HPV35\_Alpha\_333050\_nt5695\_L1\_Tile|1  
AGGCTATTAGCTGTGGGTCACCCATACTATGCTATTAAAAACAAGATTCTAATAAAATA  
>HPV35\_Alpha\_333050\_nt5700\_L1\_Tile|1  
ATTAGCTGTGGGTCACCCATACTATGCTATTAAAAACAAGATTCTAATAAAATAGCAGT  
>HPV35\_Alpha\_333050\_nt5710\_L1\_Tile|1  
GGTCACCCATACTATGCTATTAAAAACAAGATTCTAATAAAATAGCAGTACCCAAGGTA  
>HPV35\_Alpha\_333050\_nt5720\_L1\_Tile|1  
ACTATGCTATTAAAAACAAGATTCTAATAAAATAGCAGTACCCAAGGTATCTGGTTTGC  
>HPV35\_Alpha\_333050\_nt5725\_L1\_Tile|1  
GCTATTAAAAACAAGATTCTAATAAAATAGCAGTACCCAAGGTATCTGGTTTGCAATAC  
>HPV35\_Alpha\_333050\_nt5730\_L1\_Tile|1  
TAAAAACAAGATTCTAATAAAATAGCAGTACCCAAGGTATCTGGTTTGCAATACAGAGT  
>HPV35\_Alpha\_333050\_nt5735\_L1\_Tile|1  
AACAAGATTCTAATAAAATAGCAGTACCCAAGGTATCTGGTTTGCAATACAGAGTATTTA  
>HPV35\_Alpha\_333050\_nt5955\_L1\_Tile|1  
TGATACTGAAAATCTTAATAAATATGTTGGTAACTCTGGTAACTCTGGTACAGATAACAG  
>HPV35\_Alpha\_333050\_nt5960\_L1\_Tile|1  
CTGAAAATCTTAATAAATATGTTGGTAACTCTGGTAACTCTGGTACAGATAACAGGGAAT  
>HPV35\_Alpha\_333050\_nt5970\_L1\_Tile|1  
TAATAAATATGTTGGTAACTCTGGTAACTCTGGTACAGATAACAGGGAATGCATTTCTAT  
>HPV35\_Alpha\_333050\_nt6085\_L1\_Tile|1  
CATTGGGGAAAAGGCACACCTTGTAATGCTAACCAGGTAAAAGCAGGAGAATGTCCTCCT  
>HPV35\_Alpha\_333050\_nt6090\_L1\_Tile|1  
GGGAAAAGGCACACCTTGTAATGCTAACCAGGTAAAAGCAGGAGAATGTCCTCCTTTGGA  
>HPV35\_Alpha\_333050\_nt6095\_L1\_Tile|1  
AAGGCACACCTTGTAATGCTAACCAGGTAAAAGCAGGAGAATGTCCTCCTTTGGAGTTAC  
>HPV35\_Alpha\_333050\_nt6100\_L1\_Tile|1  
ACACCTTGTAATGCTAACCAGGTAAAAGCAGGAGAATGTCCTCCTTTGGAGTTACTAAAC  
>HPV35\_Alpha\_333050\_nt6105\_L1\_Tile|1  
TTGTAATGCTAACCAGGTAAAAGCAGGAGAATGTCCTCCTTTGGAGTTACTAAACACTGT  
>HPV35\_Alpha\_333050\_nt6110\_L1\_Tile|1  
ATGCTAACCAGGTAAAAGCAGGAGAATGTCCTCCTTTGGAGTTACTAAACACTGTACTAC  
>HPV35\_Alpha\_333050\_nt6140\_L1\_Tile|1  
CTCCTTTGGAGTTACTAAACACTGTACTACAAGACGCGGACATGGTAGACACAGGATTTG  
>HPV35\_Alpha\_333050\_nt6200\_L1\_Tile|1  
GTGCAATGGATTTTACTACATTACAAGCTAATAAAAGTGATGTTCCCCTAGATATATGCA  
>HPV35\_Alpha\_333050\_nt6205\_L1\_Tile|1  
ATGGATTTTACTACATTACAAGCTAATAAAAGTGATGTTCCCCTAGATATATGCAGTTCC  
>HPV35\_Alpha\_333050\_nt6210\_L1\_Tile|1  
TTTTACTACATTACAAGCTAATAAAAGTGATGTTCCCCTAGATATATGCAGTTCCATTTG

>HPV35\_Alpha\_333050\_nt6375\_L1\_Tile|1  
TGGAAGTGTAGGTGAAACAGTACCTGCAGACCTATATATTAAGGGTACCACTGGCACATT  
>HPV35\_Alpha\_333050\_nt6380\_L1\_Tile|1  
CTGTAGGTGAAACAGTACCTGCAGACCTATATATTAAGGGTACCACTGGCACATTGCCTA  
>HPV35\_Alpha\_333050\_nt6395\_L1\_Tile|1  
TACCTGCAGACCTATATATTAAGGGTACCACTGGCACATTGCCTAGTACTAGTTATTTTC  
>HPV35\_Alpha\_333050\_nt6405\_L1\_Tile|1  
CCTATATATTAAGGGTACCACTGGCACATTGCCTAGTACTAGTTATTTTCCTACTCCTAG  
>HPV35\_Alpha\_333050\_nt6410\_L1\_Tile|1  
ATATTAAGGGTACCACTGGCACATTGCCTAGTACTAGTTATTTTCCTACTCCTAGTGGCT  
>HPV35\_Alpha\_333050\_nt6570\_L1\_Tile|1  
TACTGTAGTTGATACAACCCGTAGTACAAATATGTCTGTGTGTTCTGCTGTGTCTTCTAG  
>HPV35\_Alpha\_333050\_nt6575\_L1\_Tile|1  
TAGTTGATACAACCCGTAGTACAAATATGTCTGTGTGTTCTGCTGTGTCTTCTAGTGACA  
>HPV35\_Alpha\_333050\_nt6580\_L1\_Tile|1  
GATACAACCCGTAGTACAAATATGTCTGTGTGTTCTGCTGTGTCTTCTAGTGACAGTACA  
>HPV35\_Alpha\_333050\_nt6710\_L1\_Tile|1  
TATGTAAATAACACTAACAGCAGATGTTATGACATATATTCATAGTATGAACCCGTCCA  
>HPV35\_Alpha\_333050\_nt6815\_L1\_Tile|1  
CCTTAGAGGACACATATCGCTATGTAACATCACAGGCTGTAACCTGTCAAAAACCCAGTG  
>HPV35\_Alpha\_333050\_nt6840\_L1\_Tile|1  
AACATCACAGGCTGTAACCTGTCAAAAACCCAGTGACCAAAACCTAAAGATGATCCATT  
>HPV35\_Alpha\_333050\_nt6970\_L1\_Tile|1  
GGCCGTAAATTTTGTTCACAAGCAGGACTAAAGGCCAGGCCTAATTTTAGATTAGGCAGG  
>HPV35\_Alpha\_333050\_nt6980\_L1\_Tile|1  
TTTTGTTCACAAGCAGGACTAAAGGCCAGGCCTAATTTTAGATTAGGCAGGCGTGCAGCTC  
>HPV35\_Alpha\_333050\_nt6985\_L1\_Tile|1  
TTACAAGCAGGACTAAAGGCCAGGCCTAATTTTAGATTAGGCAGGCGTGCAGCTCCAGCA  
>HPV35\_Alpha\_333050\_nt6990\_L1\_Tile|1  
AGCAGGACTAAAGGCCAGGCCTAATTTTAGATTAGGCAGGCGTGCAGCTCCAGCATCTAC  
>HPV35\_Alpha\_333050\_nt6995\_L1\_Tile|1  
GACTAAAGGCCAGGCCTAATTTTAGATTAGGCAGGCGTGCAGCTCCAGCATCTACATCTA  
>HPV35\_Alpha\_333050\_nt7000\_L1\_Tile|1  
AAGGCCAGGCCTAATTTTAGATTAGGCAGGCGTGCAGCTCCAGCATCTACATCTAAAAAA  
>HPV35\_Alpha\_333050\_nt7005\_L1\_Tile|1  
CAGGCCTAATTTTAGATTAGGCAGGCGTGCAGCTCCAGCATCTACATCTAAAAAATCTTC  
>HPV35\_Alpha\_333050\_nt7010\_L1\_Tile|1  
CTAATTTTAGATTAGGCAGGCGTGCAGCTCCAGCATCTACATCTAAAAAATCTTCTACTA  
>HPV35\_Alpha\_333050\_nt7015\_L1\_Tile|1  
TTTAGATTAGGCAGGCGTGCAGCTCCAGCATCTACATCTAAAAAATCTTCTACTAAACGT  
>HPV35\_Alpha\_333050\_nt7025\_L1\_Tile|1  
GCAGGCGTGCAGCTCCAGCATCTACATCTAAAAAATCTTCTACTAAACGTAGAAAAGTAA  
>HPV36\_Beta\_1020218\_nt5967\_L1\_Tile|1  
GATGAATATATACAAAGGACAAATATTTATTATCATGCATTTCAGCGACAGACTACTGACT  
>HPV36\_Beta\_1020218\_nt5972\_L1\_Tile|1  
ATATATACAAAGGACAAATATTTATTATCATGCATTTCAGCGACAGACTACTGACTGTAGG  
>HPV36\_Beta\_1020218\_nt5987\_L1\_Tile|1  
AAATATTTATTATCATGCATTTCAGCGACAGACTACTGACTGTAGGCCATCCATACTTCAA  
>HPV36\_Beta\_1020218\_nt6022\_L1\_Tile|2  
TGACTGTAGGCCATCCATACTTCAATGTTTACGATATTACTGGTAACAAATTAGAAGTCC  
>HPV36\_Beta\_1020218\_nt6027\_L1\_Tile|1  
GTAGGCCATCCATACTTCAATGTTTACGATATTACTGGTAACAAATTAGAAGTCCCTAAA  
>HPV36\_Beta\_1020218\_nt6047\_L1\_Tile|1  
TGTTTACGATATTACTGGTAACAAATTAGAAGTCCCTAAAGTGTCTGGTAACCAACACAG  
>HPV36\_Beta\_1020218\_nt6062\_L1\_Tile|2

TGGTAACAAATTAGAAAGTCCCTAAAGTGTCTGGTAACCAACACAGGGTTTTTCGCTTGAA  
>HPV36\_Beta\_1020218\_nt6387\_L1\_Tile|1  
GGTGAACATTGGGACAAGGCTATACCTTGTGAAAAGGAGCGCCAGGACAACAGACTATGC  
>HPV36\_Beta\_1020218\_nt6397\_L1\_Tile|1  
GGGACAAGGCTATACCTTGTGAAAAGGAGCGCCAGGACAACAGACTATGCCCACCAATTG  
>HPV36\_Beta\_1020218\_nt6402\_L1\_Tile|2  
AAGGCTATACCTTGTGAAAAGGAGCGCCAGGACAACAGACTATGCCCACCAATTGAATTG  
>HPV36\_Beta\_1020218\_nt6407\_L1\_Tile|1  
TATACCTTGTGAAAAGGAGCGCCAGGACAACAGACTATGCCCACCAATTGAATTGAAAAC  
>HPV36\_Beta\_1020218\_nt6427\_L1\_Tile|1  
GCCAGGACAACAGACTATGCCCACCAATTGAATTGAAAACACTTATATAGAAGATGGCG  
>HPV36\_Beta\_1020218\_nt6487\_L1\_Tile|1  
ACATGGCAGATATAGGTTTTGGAAATTTAAACTTCAAAAATCTGCAAGAGAGTAGGTCAG  
>HPV36\_Beta\_1020218\_nt6492\_L1\_Tile|1  
GCAGATATAGGTTTTGGAAATTTAAACTTCAAAAATCTGCAAGAGAGTAGGTCAGATGTA  
>HPV36\_Beta\_1020218\_nt6497\_L1\_Tile|1  
TATAGGTTTTGGAAATTTAAACTTCAAAAATCTGCAAGAGAGTAGGTCAGATGTAAGTTT  
>HPV36\_Beta\_1020218\_nt6502\_L1\_Tile|2  
GTTTTGGAAATTTAAACTTCAAAAATCTGCAAGAGAGTAGGTCAGATGTAAGTTTGGATA  
>HPV36\_Beta\_1020218\_nt6687\_L1\_Tile|1  
AAAACGGGTGACGACATCCCTGACGCCAGAATTGATAATGGGACTTTTAAGAATCAGTTT  
>HPV36\_Beta\_1020218\_nt6692\_L1\_Tile|1  
GGGTGACGACATCCCTGACGCCAGAATTGATAATGGGACTTTTAAGAATCAGTTTTTCAT  
>HPV36\_Beta\_1020218\_nt6707\_L1\_Tile|1  
TGACGCCAGAATTGATAATGGGACTTTTAAGAATCAGTTTTTCATTCTGGGGCTGACGG  
>HPV36\_Beta\_1020218\_nt6927\_L1\_Tile|1  
GTAGACAACACACGAAATACTAACTTTAGTATTTCAATATATAACAATAATGGGGGACTA  
>HPV36\_Beta\_1020218\_nt6942\_L1\_Tile|2  
AATACTAACTTTAGTATTTCAATATATAACAATAATGGGGGACTAAAGGACATCAATGAT  
>HPV36\_Beta\_1020218\_nt6947\_L1\_Tile|1  
TAACTTTAGTATTTCAATATATAACAATAATGGGGGACTAAAGGACATCAATGATTACAC  
>HPV36\_Beta\_1020218\_nt6952\_L1\_Tile|1  
TTAGTATTTCAATATATAACAATAATGGGGGACTAAAGGACATCAATGATTACACTGCAG  
>HPV36\_Beta\_1020218\_nt6962\_L1\_Tile|2  
AATATATAACAATAATGGGGGACTAAAGGACATCAATGATTACACTGCAGAGCAATTTAG  
>HPV36\_Beta\_1020218\_nt6967\_L1\_Tile|1  
ATAACAATAATGGGGGACTAAAGGACATCAATGATTACACTGCAGAGCAATTTAGAGAAT  
>HPV36\_Beta\_1020218\_nt6987\_L1\_Tile|1  
AAGGACATCAATGATTACACTGCAGAGCAATTTAGAGAATATCAAAGGCACGTGGAGGAA  
>HPV36\_Beta\_1020218\_nt7152\_L1\_Tile|1  
GGTTTTGTACCTACTCCAGATAACCCTATTCAAGACACCTATCGATATATTGATTCATTA  
>HPV36\_Beta\_1020218\_nt7162\_L1\_Tile|2  
CTACTCCAGATAACCCTATTCAAGACACCTATCGATATATTGATTCATTAGCCACTCGCT  
>HPV36\_Beta\_1020218\_nt7167\_L1\_Tile|1  
CCAGATAACCCTATTCAAGACACCTATCGATATATTGATTCATTAGCCACTCGCTGTCCT  
>HPV36\_Beta\_1020218\_nt7242\_L1\_Tile|2  
AAGGAAAAAGAGGATCCCTACAAGGGGTAAAGTTCTGGGATGTGGATCTTACTGAACGG  
>HPV36\_Beta\_1020218\_nt7252\_L1\_Tile|1  
AGGATCCCTACAAGGGGTAAAGTTCTGGGATGTGGATCTTACTGAACGGTTGTCACTAG  
>HPV36\_Beta\_1020218\_nt7257\_L1\_Tile|1  
CCCTACAAGGGGTAAAGTTCTGGGATGTGGATCTTACTGAACGGTTGTCACTAGATTTG  
>HPV36\_Beta\_1020218\_nt7382\_L1\_Tile|2  
TACAAAATCAGTGTCTTATCGAGGGTTTACCAGAGGAACCAAGCGCAAGCGAAAACAGTA  
>HPV36\_Beta\_1020218\_nt7383\_L1\_Tile|1  
ACAAAATCAGTGTCTTATCGAGGGTTTACCAGAGGAACCAAGCGCAAGCGAAAACAGTAA

>HPV37\_Beta\_1020226\_nt6027\_L1\_Tile|1  
CGGGCTTGGAGATAGGCCGAGGGCAACCACTTGGAGTAGGAACGACAGGTCACCCTTTAT  
>HPV37\_Beta\_1020226\_nt6082\_L1\_Tile|2  
TTTATTTAATAAATTAAGGGACACTGAGAATAATAGTAATTACCAAGGGGGGTCACGGGA  
>HPV37\_Beta\_1020226\_nt6087\_L1\_Tile|1  
TTAATAAATTAAGGGACACTGAGAATAATAGTAATTACCAAGGGGGGTCACGGGATGATA  
>HPV37\_Beta\_1020226\_nt6092\_L1\_Tile|1  
AAATTAAGGGACACTGAGAATAATAGTAATTACCAAGGGGGGTCACGGGATGATAGACAA  
>HPV37\_Beta\_1020226\_nt6097\_L1\_Tile|1  
AAGGGACACTGAGAATAATAGTAATTACCAAGGGGGGTCACGGGATGATAGACAAAACAC  
>HPV37\_Beta\_1020226\_nt6102\_L1\_Tile|2  
ACACTGAGAATAATAGTAATTACCAAGGGGGGTCACGGGATGATAGACAAAACACATCAT  
>HPV37\_Beta\_1020226\_nt6107\_L1\_Tile|1  
GAGAATAATAGTAATTACCAAGGGGGGTCACGGGATGATAGACAAAACACATCATTTGAT  
>HPV37\_Beta\_1020226\_nt6227\_L1\_Tile|1  
AAAGCACCAGTTTGTGCATCAGAGGAAAATAATCAGACAGGACAGTGTCCACCACTTGAA  
>HPV37\_Beta\_1020226\_nt6232\_L1\_Tile|1  
ACCAGTTTGTGCATCAGAGGAAAATAATCAGACAGGACAGTGTCCACCACTTGAATTAAA  
>HPV37\_Beta\_1020226\_nt6247\_L1\_Tile|1  
AGAGGAAAATAATCAGACAGGACAGTGTCCACCACTTGAATTAAAAAACACAGTGATTGA  
>HPV37\_Beta\_1020226\_nt6312\_L1\_Tile|1  
GGGACATGTTTGATATAGGGTTCGGAATATTAACAATAAGGTTCTCTCTACTAATAAAT  
>HPV37\_Beta\_1020226\_nt6317\_L1\_Tile|1  
ATGTTTGATATAGGGTTCGGAATATTAACAATAAGGTTCTCTCTACTAATAAATCAGAT  
>HPV37\_Beta\_1020226\_nt6322\_L1\_Tile|2  
TGATATAGGGTTCGGAATATTAACAATAAGGTTCTCTCTACTAATAAATCAGATGTTAG  
>HPV37\_Beta\_1020226\_nt6327\_L1\_Tile|1  
TAGGGTTCGGAATATTAACAATAAGGTTCTCTCTACTAATAAATCAGATGTTAGTTTAG  
>HPV37\_Beta\_1020226\_nt6332\_L1\_Tile|1  
TTCGGAATATTAACAATAAGGTTCTCTCTACTAATAAATCAGATGTTAGTTTAGATATA  
>HPV37\_Beta\_1020226\_nt6337\_L1\_Tile|1  
AAATATTAACAATAAGGTTCTCTCTACTAATAAATCAGATGTTAGTTTAGATATAGTAAA  
>HPV37\_Beta\_1020226\_nt6342\_L1\_Tile|2  
TTAACAATAAGGTTCTCTCTACTAATAAATCAGATGTTAGTTTAGATATAGTAAATGAAA  
>HPV37\_Beta\_1020226\_nt6527\_L1\_Tile|1  
GCTATTCCCGATGGCACTGTTAATCAGGACCACAAATATTACTTACCTGCCAAATCAGAC  
>HPV37\_Beta\_1020226\_nt6532\_L1\_Tile|1  
TCCCGATGGCACTGTTAATCAGGACCACAAATATTACTTACCTGCCAAATCAGACCAGCA  
>HPV37\_Beta\_1020226\_nt6542\_L1\_Tile|2  
ACTGTTAATCAGGACCACAAATATTACTTACCTGCCAAATCAGACCAGCAGCAGTATCTG  
>HPV37\_Beta\_1020226\_nt6547\_L1\_Tile|1  
TAATCAGGACCACAAATATTACTTACCTGCCAAATCAGACCAGCAGCAGTATCTGTTAGG  
>HPV37\_Beta\_1020226\_nt6552\_L1\_Tile|1  
AGGACCACAAATATTACTTACCTGCCAAATCAGACCAGCAGCAGTATCTGTTAGGCAATT  
>HPV37\_Beta\_1020226\_nt6562\_L1\_Tile|2  
ATATTACTTACCTGCCAAATCAGACCAGCAGCAGTATCTGTTAGGCAATTCTACCTATTT  
>HPV37\_Beta\_1020226\_nt6567\_L1\_Tile|1  
ACTTACCTGCCAAATCAGACCAGCAGCAGTATCTGTTAGGCAATTCTACCTATTTTCCCA  
>HPV37\_Beta\_1020226\_nt6572\_L1\_Tile|1  
CCTGCCAAATCAGACCAGCAGCAGTATCTGTTAGGCAATTCTACCTATTTTCCCACTGTT  
>HPV37\_Beta\_1020226\_nt6577\_L1\_Tile|1  
CAAATCAGACCAGCAGCAGTATCTGTTAGGCAATTCTACCTATTTTCCCACTGTTAGTGG  
>HPV37\_Beta\_1020226\_nt6972\_L1\_Tile|1  
CTACTCCAGATAATTACGTACATGACCTTTATAGGTACATTAATTCAAAGGCTACCAAGT  
>HPV37\_Beta\_1020226\_nt7112\_L1\_Tile|1

TTATCATTGGATTTAGATCAATATCCTTTAGGGAGGAAATTCATCTTTCAGTCGGGATTG  
>HPV37\_Beta\_1020226\_nt7122\_L1\_Tile|2  
ATTTAGATCAATATCCTTTAGGGAGGAAATTCATCTTTCAGTCGGGATTGCAAAGTAGAC  
>HPV37\_Beta\_1020226\_nt7127\_L1\_Tile|1  
GATCAATATCCTTTAGGGAGGAAATTCATCTTTCAGTCGGGATTGCAAAGTAGACCTAGA  
>HPV37\_Beta\_1020226\_nt7132\_L1\_Tile|1  
ATATCCTTTAGGGAGGAAATTCATCTTTCAGTCGGGATTGCAAAGTAGACCTAGAATTGT  
>HPV37\_Beta\_1020226\_nt7137\_L1\_Tile|1  
CTTTAGGGAGGAAATTCATCTTTCAGTCGGGATTGCAAAGTAGACCTAGAATTGTTTCGAT  
>HPV37\_Beta\_1020226\_nt7142\_L1\_Tile|2  
GGGAGGAAATTCATCTTTCAGTCGGGATTGCAAAGTAGACCTAGAATTGTTTCGATCGTCT  
>HPV37\_Beta\_1020226\_nt7147\_L1\_Tile|1  
GAAATTCATCTTTCAGTCGGGATTGCAAAGTAGACCTAGAATTGTTTCGATCGTCTGTAAA  
>HPV37\_Beta\_1020226\_nt7152\_L1\_Tile|1  
TCATCTTTCAGTCGGGATTGCAAAGTAGACCTAGAATTGTTTCGATCGTCTGTAAAAGTGT  
>HPV37\_Beta\_1020226\_nt7157\_L1\_Tile|1  
TTTCAGTCGGGATTGCAAAGTAGACCTAGAATTGTTTCGATCGTCTGTAAAAGTGTCTAAA  
>HPV37\_Beta\_1020226\_nt7167\_L1\_Tile|1  
GATTGCAAAGTAGACCTAGAATTGTTTCGATCGTCTGTAAAAGTGTCTAAAGGTACAAAGC  
>HPV37\_Beta\_1020226\_nt7172\_L1\_Tile|1  
CAAAGTAGACCTAGAATTGTTTCGATCGTCTGTAAAAGTGTCTAAAGGTACAAAGCGTAAA  
>HPV37\_Beta\_1020226\_nt7181\_L1\_Tile|1  
CCTAGAATTGTTTCGATCGTCTGTAAAAGTGTCTAAAGGTACAAAGCGTAAACGGTCGTGA  
>HPV38\_Beta\_1020234\_nt6352\_L1\_Tile|1  
TACCCAGATTTTCTTACCATGTCTAATGATGTTTATGGTGATTCTTGCTTCTTTTTTGTG  
>HPV38\_Beta\_1020234\_nt6437\_L1\_Tile|1  
ATTATTTTGTTCGAGGTGGTGCAGTGGGTGACGCTATTCCAGATGGTACTGTCAACCAA  
>HPV38\_Beta\_1020234\_nt6442\_L1\_Tile|2  
TTTGTTCGAGGTGGTGCAGTGGGTGACGCTATTCCAGATGGTACTGTCAACCAAAATCAT  
>HPV38\_Beta\_1020234\_nt6462\_L1\_Tile|2  
GGGTGACGCTATTCCAGATGGTACTGTCAACCAAAATCATAATTATTATTACCTGCAAA  
>HPV38\_Beta\_1020234\_nt6467\_L1\_Tile|1  
ACGCTATTCCAGATGGTACTGTCAACCAAAATCATAATTATTATTATTACCTGCAAAAAATG  
>HPV38\_Beta\_1020234\_nt6477\_L1\_Tile|1  
AGATGGTACTGTCAACCAAAATCATAATTATTATTATTACCTGCAAAAAATGGACAGGGTCA  
>HPV38\_Beta\_1020234\_nt6482\_L1\_Tile|2  
GTACTGTCAACCAAAATCATAATTATTATTATTACCTGCAAAAAATGGACAGGGTCAACGCA  
>HPV38\_Beta\_1020234\_nt6487\_L1\_Tile|1  
GTCAACCAAAATCATAATTATTATTATTACCTGCAAAAAATGGACAGGGTCAACGCACTTTA  
>HPV38\_Beta\_1020234\_nt6492\_L1\_Tile|1  
CCAAAATCATAATTATTATTATTACCTGCAAAAAATGGACAGGGTCAACGCACTTTAGGGAA  
>HPV38\_Beta\_1020234\_nt6497\_L1\_Tile|1  
ATCATAATTATTATTATTACCTGCAAAAAATGGACAGGGTCAACGCACTTTAGGGAACTCTA  
>HPV38\_Beta\_1020234\_nt6502\_L1\_Tile|2  
AATTATTATTATTACCTGCAAAAAATGGACAGGGTCAACGCACTTTAGGGAACTCTACGTAT  
>HPV38\_Beta\_1020234\_nt6507\_L1\_Tile|1  
TTATTATTACCTGCAAAAAATGGACAGGGTCAACGCACTTTAGGGAACTCTACGTATTTTCC  
>HPV38\_Beta\_1020234\_nt6537\_L1\_Tile|1  
ACGCACTTTAGGGAACCTCTACGTATTTTCCAACAGTTAGTGGATCCTTGGTGACGTCTGA  
>HPV38\_Beta\_1020234\_nt6667\_L1\_Tile|1  
AATCAAATGTTTGTACAGTCGCTGATAATACCCGAAATACAACTTTACAATCAGTGTA  
>HPV38\_Beta\_1020234\_nt6672\_L1\_Tile|1  
AATGTTTGTACAGTCGCTGATAATACCCGAAATACAACTTTACAATCAGTGTATCCAC  
>HPV38\_Beta\_1020234\_nt6677\_L1\_Tile|1  
TTGTTACAGTCGCTGATAATACCCGAAATACAACTTTACAATCAGTGTATCCACTGAAA

>HPV38\_Beta\_1020234\_nt6682\_L1\_Tile|2  
ACAGTCGCTGATAATACCCGAAATACAACTTTACAATCAGTGTATCCACTGAAAACGGG  
>HPV38\_Beta\_1020234\_nt6692\_L1\_Tile|1  
ATAATACCCGAAATACAACTTTACAATCAGTGTATCCACTGAAAACGGGGGTGCTCAAG  
>HPV38\_Beta\_1020234\_nt6702\_L1\_Tile|2  
AAATACAACTTTACAATCAGTGTATCCACTGAAAACGGGGGTGCTCAAGAATATGATTC  
>HPV38\_Beta\_1020234\_nt6797\_L1\_Tile|1  
AATACCAATTGTCATTTATATTGCAATTGTGTAAGGTTCTTTAAATGCTGAAGTGCTGA  
>HPV38\_Beta\_1020234\_nt6802\_L1\_Tile|2  
CAATTGTCATTTATATTGCAATTGTGTAAGGTTCTTTAAATGCTGAAGTGCTGACACAG  
>HPV38\_Beta\_1020234\_nt6807\_L1\_Tile|1  
GTCATTTATATTGCAATTGTGTAAGGTTCTTTAAATGCTGAAGTGCTGACACAGATTAA  
>HPV38\_Beta\_1020234\_nt6897\_L1\_Tile|1  
GCAATTAGGCTTTGTACCCACCCAGACAATTCTGTACACGATACATATCGTTACATAAC  
>HPV38\_Beta\_1020234\_nt6907\_L1\_Tile|1  
TTTGTACCCACCCAGACAATTCTGTACACGATACATATCGTTACATAACATCTAAAGCA  
>HPV38\_Beta\_1020234\_nt6922\_L1\_Tile|2  
GACAATTCTGTACACGATACATATCGTTACATAACATCTAAAGCAACTAAATGTCCAGAT  
>HPV38\_Beta\_1020234\_nt6927\_L1\_Tile|1  
TTCTGTACACGATACATATCGTTACATAACATCTAAAGCAACTAAATGTCCAGATGCAGT  
>HPV38\_Beta\_1020234\_nt6937\_L1\_Tile|1  
GATACATATCGTTACATAACATCTAAAGCAACTAAATGTCCAGATGCAGTGCCTGAAACA  
>HPV38\_Beta\_1020234\_nt6942\_L1\_Tile|2  
ATATCGTTACATAACATCTAAAGCAACTAAATGTCCAGATGCAGTGCCTGAAACAGAAAA  
>HPV38\_Beta\_1020234\_nt7092\_L1\_Tile|1  
ATTTTTTATTCCAAGCAGGTTTACAAACAGCACGAACACGTGCTGTCAAACGGCCGTTAGT  
>HPV38\_Beta\_1020234\_nt7097\_L1\_Tile|1  
TATTCCAAGCAGGTTTACAAACAGCACGAACACGTGCTGTCAAACGGCCGTTAGTAAGAA  
>HPV38\_Beta\_1020234\_nt7102\_L1\_Tile|2  
CAAGCAGGTTTACAAACAGCACGAACACGTGCTGTCAAACGGCCGTTAGTAAGAAAATCT  
>HPV38\_Beta\_1020234\_nt7107\_L1\_Tile|1  
AGGTTTACAAACAGCACGAACACGTGCTGTCAAACGGCCGTTAGTAAGAAAATCTTCCAA  
>HPV38\_Beta\_1020234\_nt7112\_L1\_Tile|1  
TACAAACAGCACGAACACGTGCTGTCAAACGGCCGTTAGTAAGAAAATCTTCCAAATCTG  
>HPV38\_Beta\_1020234\_nt7127\_L1\_Tile|1  
CACGTGCTGTCAAACGGCCGTTAGTAAGAAAATCTTCCAAATCTGTAAAACGCAAAGGA  
>HPV38\_Beta\_1020234\_nt7135\_L1\_Tile|1  
GTCAAACGGCCGTTAGTAAGAAAATCTTCCAAATCTGTAAAACGCAAAGGACCCAGTAA  
>HPV39\_Alpha\_333245\_nt6004\_L1\_Tile|1  
CCATTATATAATAGACAGGATGATACTGAAAACCTACCATTTTCATCAACCACCAATAAG  
>HPV39\_Alpha\_333245\_nt6009\_L1\_Tile|1  
ATATAATAGACAGGATGATACTGAAAACCTACCATTTTCATCAACCACCAATAAGGACAG  
>HPV39\_Alpha\_333245\_nt6014\_L1\_Tile|1  
ATAGACAGGATGATACTGAAAACCTACCATTTTCATCAACCACCAATAAGGACAGTAGGG  
>HPV39\_Alpha\_333245\_nt6419\_L1\_Tile|1  
TTTGGAATCGTGGTGGTATGGTGGGTGACGCCATTCTGCCCAATTGTATATTAAGGGCA  
>HPV39\_Alpha\_333245\_nt6424\_L1\_Tile|1  
AATCGTGGTGGTATGGTGGGTGACGCCATTCTGCCCAATTGTATATTAAGGGCACAGAT  
>HPV39\_Alpha\_333245\_nt6429\_L1\_Tile|1  
TGGTGGTATGGTGGGTGACGCCATTCTGCCCAATTGTATATTAAGGGCACAGATATACG  
>HPV39\_Alpha\_333245\_nt6439\_L1\_Tile|1  
GTGGGTGACGCCATTCTGCCCAATTGTATATTAAGGGCACAGATATACGTGCAAACCCC  
>HPV39\_Alpha\_333245\_nt6454\_L1\_Tile|1  
CCTGCCCAATTGTATATTAAGGGCACAGATATACGTGCAAACCCCCGGTAGTTCTGTATAC  
>HPV39\_Alpha\_333245\_nt6469\_L1\_Tile|1

ATTAAGGGGCACAGATATACGTGCAAACCCCGGTAGTTCTGTATACTGCCCCCTCTCCCAGC  
>HPV39\_Alpha\_333245\_nt6479\_L1\_Tile|1  
CAGATATACGTGCAAACCCCGGTAGTTCTGTATACTGCCCCCTCTCCCAGCGGTTCCATGG  
>HPV39\_Alpha\_333245\_nt6489\_L1\_Tile|1  
TGCAAACCCCGGTAGTTCTGTATACTGCCCCCTCTCCCAGCGGTTCCATGGTAACCTCTGA  
>HPV39\_Alpha\_333245\_nt6499\_L1\_Tile|1  
GGTAGTTCTGTATACTGCCCCCTCTCCCAGCGGTTCCATGGTAACCTCTGATTCCCAGTTA  
>HPV39\_Alpha\_333245\_nt6619\_L1\_Tile|1  
AATCAATTATTTCTTACTGTTGTGGACACTACCCGTAGTACCAACTTTACATTATCTACC  
>HPV39\_Alpha\_333245\_nt6624\_L1\_Tile|1  
ATTATTTCTTACTGTTGTGGACACTACCCGTAGTACCAACTTTACATTATCTACCTCTAT  
>HPV39\_Alpha\_333245\_nt6629\_L1\_Tile|1  
TTCTTACTGTTGTGGACACTACCCGTAGTACCAACTTTACATTATCTACCTCTATAGAGT  
>HPV39\_Alpha\_333245\_nt6634\_L1\_Tile|1  
ACTGTTGTGGACACTACCCGTAGTACCAACTTTACATTATCTACCTCTATAGAGTCTTCC  
>HPV39\_Alpha\_333245\_nt6639\_L1\_Tile|1  
TGTGGACACTACCCGTAGTACCAACTTTACATTATCTACCTCTATAGAGTCTTCCATACC  
>HPV39\_Alpha\_333245\_nt6644\_L1\_Tile|1  
ACACTACCCGTAGTACCAACTTTACATTATCTACCTCTATAGAGTCTTCCATACCTTCTA  
>HPV39\_Alpha\_333245\_nt6649\_L1\_Tile|1  
ACCCGTAGTACCAACTTTACATTATCTACCTCTATAGAGTCTTCCATACCTTCTACATAT  
>HPV39\_Alpha\_333245\_nt6654\_L1\_Tile|1  
TAGTACCAACTTTACATTATCTACCTCTATAGAGTCTTCCATACCTTCTACATATGATCC  
>HPV39\_Alpha\_333245\_nt6664\_L1\_Tile|1  
TTTACATTATCTACCTCTATAGAGTCTTCCATACCTTCTACATATGATCCTTCTAAGTTT  
>HPV39\_Alpha\_333245\_nt6674\_L1\_Tile|1  
CTACCTCTATAGAGTCTTCCATACCTTCTACATATGATCCTTCTAAGTTTAAGGAATATA  
>HPV39\_Alpha\_333245\_nt6679\_L1\_Tile|1  
TCTATAGAGTCTTCCATACCTTCTACATATGATCCTTCTAAGTTTAAGGAATATACCAGG  
>HPV39\_Alpha\_333245\_nt6764\_L1\_Tile|1  
TTATATTTCAACTGTGTACTGTACATTAACAACCTGATGTTATGTCTTATATTACACTA  
>HPV39\_Alpha\_333245\_nt6779\_L1\_Tile|1  
GTACTGTACATTAACAACCTGATGTTATGTCTTATATTACACTATGAATTCCTCTATAT  
>HPV39\_Alpha\_333245\_nt6789\_L1\_Tile|1  
ATTAACAACCTGATGTTATGTCTTATATTACACTATGAATTCCTCTATATTGGACAATTG  
>HPV39\_Alpha\_333245\_nt6844\_L1\_Tile|1  
AATTGGAATTTTGCTGTAGCTCCTCCACCATCTGCCAGTTTGGTAGACACTTACAGATAC  
>HPV39\_Alpha\_333245\_nt6849\_L1\_Tile|1  
GAATTTTGCTGTAGCTCCTCCACCATCTGCCAGTTTGGTAGACACTTACAGATACCTACA  
>HPV39\_Alpha\_333245\_nt6854\_L1\_Tile|1  
TTGCTGTAGCTCCTCCACCATCTGCCAGTTTGGTAGACACTTACAGATACCTACAGTCTG  
>HPV39\_Alpha\_333245\_nt6869\_L1\_Tile|1  
CACCATCTGCCAGTTTGGTAGACACTTACAGATACCTACAGTCTGCAGCCATTACATGTC  
>HPV39\_Alpha\_333245\_nt7054\_L1\_Tile|1  
CAGGCCAGGGTCCGCAGGCGCCCTACTATAGGTCCCCGAAAGCGGCCTGCTGCATCCACT  
>HPV39\_Alpha\_333245\_nt7059\_L1\_Tile|1  
CAGGGTCCGCAGGCGCCCTACTATAGGTCCCCGAAAGCGGCCTGCTGCATCCACTTCCTC  
>HPV40\_Alpha\_397014\_nt5885\_L1\_Tile|1  
GCTGGTAGTGCCAGTTACTGACTATAGGACATCCATACTTTGAGTTAAAAAAACCCAAT  
>HPV40\_Alpha\_397014\_nt5890\_L1\_Tile|1  
TAGTGCCAGGTTACTGACTATAGGACATCCATACTTTGAGTTAAAAAAACCCAATGGTGA  
>HPV40\_Alpha\_397014\_nt5900\_L1\_Tile|1  
TTACTGACTATAGGACATCCATACTTTGAGTTAAAAAAACCCAATGGTGACATTTTCAGTG  
>HPV40\_Alpha\_397014\_nt5905\_L1\_Tile|1  
GACTATAGGACATCCATACTTTGAGTTAAAAAAACCCAATGGTGACATTTTCAGTGCCTAA



>HPV40\_Alpha\_397014\_nt6145\_L1\_Tile|1  
TAAGGATGAGGATGTGGAAACTCATCTGCCTATGGCACAGGTCCGGGGCAGGATAGTAG  
>HPV40\_Alpha\_397014\_nt6160\_L1\_Tile|1  
GGAAAACTCATCTGCCTATGGCACAGGTCCGGGGCAGGATAGTAGGGAAAATGTAGCTAT  
>HPV40\_Alpha\_397014\_nt6565\_L1\_Tile|1  
AGGTACTACTGGTGATAGTGTCCCAACTGACTTATATATAACAGGTACATCTGGTCGGAC  
>HPV40\_Alpha\_397014\_nt6575\_L1\_Tile|1  
GGTGATAGTGTCCCAACTGACTTATATATAACAGGTACATCTGGTCGGACTCCTATTGCA  
>HPV40\_Alpha\_397014\_nt6795\_L1\_Tile|1  
ATTTAACCTTATGTGCTGCCACACAGTCCCCACACCAACCCCATATAATAACAGTAATT  
>HPV40\_Alpha\_397014\_nt6800\_L1\_Tile|1  
ACCTTATGTGCTGCCACACAGTCCCCACACCAACCCCATATAATAACAGTAATTTCAAG  
>HPV40\_Alpha\_397014\_nt6810\_L1\_Tile|1  
CTGCCACACAGTCCCCACACCAACCCCATATAATAACAGTAATTTCAAGGAATATTTGC  
>HPV40\_Alpha\_397014\_nt6990\_L1\_Tile|1  
AAATTGCTCCTCCAGCCTCTGCATCCTTAGAGGATACATATAGGTTCCCTTACCAACAAGG  
>HPV40\_Alpha\_397014\_nt6995\_L1\_Tile|1  
GCTCCTCCAGCCTCTGCATCCTTAGAGGATACATATAGGTTCCCTTACCAACAAGGCTATT  
>HPV40\_Alpha\_397014\_nt7000\_L1\_Tile|1  
TCCAGCCTCTGCATCCTTAGAGGATACATATAGGTTCCCTTACCAACAAGGCTATTGCCTG  
>HPV40\_Alpha\_397014\_nt7005\_L1\_Tile|1  
CCTCTGCATCCTTAGAGGATACATATAGGTTCCCTTACCAACAAGGCTATTGCCTGTCAGC  
>HPV40\_Alpha\_397014\_nt7010\_L1\_Tile|1  
GCATCCTTAGAGGATACATATAGGTTCCCTTACCAACAAGGCTATTGCCTGTCAGCGCGAT  
>HPV41\_Nu\_9626041\_nt5337\_L1\_Tile|1  
ATGACAGGCCTTCAGTATTTATTTTATAGCGATGATGGCACTCACATTGTCTATCCTACTA  
>HPV41\_Nu\_9626041\_nt5342\_L1\_Tile|2  
AGGCCTTCAGTATTTATTTTATAGCGATGATGGCACTCACATTGTCTATCCTACTAGCACA  
>HPV41\_Nu\_9626041\_nt5357\_L1\_Tile|1  
ATTTTTAGCGATGATGGCACTCACATTGTCTATCCTACTAGCACAACAGCCACCACCCCA  
>HPV41\_Nu\_9626041\_nt5367\_L1\_Tile|1  
ATGATGGCACTCACATTGTCTATCCTACTAGCACAACAGCCACCACCCCACTCGTGCCTG  
>HPV41\_Nu\_9626041\_nt5372\_L1\_Tile|1  
GGCACTCACATTGTCTATCCTACTAGCACAACAGCCACCACCCCACTCGTGCCTGCACAG  
>HPV41\_Nu\_9626041\_nt5397\_L1\_Tile|1  
GCACAACAGCCACCACCCCACTCGTGCCTGCACAGCCAGCGATGTGCCCTACATTGTTG  
>HPV41\_Nu\_9626041\_nt5407\_L1\_Tile|1  
CACCACCCCACTCGTGCCTGCACAGCCAGCGATGTGCCCTACATTGTTGTTGACTTGTA  
>HPV41\_Nu\_9626041\_nt5427\_L1\_Tile|1  
CACAGCCAGCGATGTGCCCTACATTGTTGTTGACTTGTATAGTGGAAGTATGGATTATG  
>HPV41\_Nu\_9626041\_nt5432\_L1\_Tile|1  
CCCAGCGATGTGCCCTACATTGTTGTTGACTTGTATAGTGGAAGTATGGATTATGATATA  
>HPV41\_Nu\_9626041\_nt5442\_L1\_Tile|2  
TGCCCTACATTGTTGTTGACTTGTATAGTGGAAGTATGGATTATGATATACATCCTAGCC  
>HPV41\_Nu\_9626041\_nt5447\_L1\_Tile|1  
TACATTGTTGTTGACTTGTATAGTGGAAGTATGGATTATGATATACATCCTAGCCTGTTG  
>HPV41\_Nu\_9626041\_nt5452\_L1\_Tile|1  
TGTTGTTGACTTGTATAGTGGAAGTATGGATTATGATATACATCCTAGCCTGTTGCGCAG  
>HPV41\_Nu\_9626041\_nt5467\_L1\_Tile|1  
TAGTGGAAGTATGGATTATGATATACATCCTAGCCTGTTGCGCAGGAAACGTAAAAAACG  
>HPV41\_Nu\_9626041\_nt5472\_L1\_Tile|1  
GAAGTATGGATTATGATATACATCCTAGCCTGTTGCGCAGGAAACGTAAAAAACGCAAAC  
>HPV41\_Nu\_9626041\_nt5522\_L1\_Tile|2  
AAACGCAAACGTGTTTATTTTTCAGATGGCCGTGTGGCTTCCAGGCCCAAATAGATTTTA  
>HPV41\_Nu\_9626041\_nt5527\_L1\_Tile|1

CAAACGTGTTTATTTTTCAGATGGCCGTGTGGCTTCCAGGCCCAAATAGATTTTACTTAC  
>HPV41\_Nu\_9626041\_nt5537\_L1\_Tile|1  
TATTTTTCAGATGGCCGTGTGGCTTCCAGGCCCAAATAGATTTTACTTACCCCTCAACC  
>HPV41\_Nu\_9626041\_nt5542\_L1\_Tile|2  
TTCAGATGGCCGTGTGGCTTCCAGGCCCAAATAGATTTTACTTACCCCTCAACCTATAC  
>HPV41\_Nu\_9626041\_nt5552\_L1\_Tile|1  
CGTGTGGCTTCCAGGCCCAAATAGATTTTACTTACCCCTCAACCTATACAACGGACATT  
>HPV41\_Nu\_9626041\_nt5557\_L1\_Tile|1  
GGCTTCCAGGCCCAAATAGATTTTACTTACCCCTCAACCTATACAACGGACATTGAACA  
>HPV41\_Nu\_9626041\_nt5572\_L1\_Tile|1  
ATAGATTTTACTTACCCCTCAACCTATACAACGGACATTGAACACAGAGGAATACGTGA  
>HPV41\_Nu\_9626041\_nt5577\_L1\_Tile|1  
TTTTACTTACCCCTCAACCTATACAACGGACATTGAACACAGAGGAATACGTGAGACGC  
>HPV41\_Nu\_9626041\_nt5587\_L1\_Tile|1  
CCCCTCAACCTATACAACGGACATTGAACACAGAGGAATACGTGAGACGCACCAGTACTT  
>HPV41\_Nu\_9626041\_nt5612\_L1\_Tile|1  
GAACACAGAGGAATACGTGAGACGCACCAGTACTTTCCTCCATGCTGCCACTGACCGTTT  
>HPV41\_Nu\_9626041\_nt5622\_L1\_Tile|2  
GAATACGTGAGACGCACCAGTACTTTCCTCCATGCTGCCACTGACCGTTTGCTTACTGTT  
>HPV41\_Nu\_9626041\_nt5642\_L1\_Tile|3  
TACTTTCCTCCATGCTGCCACTGACCGTTTGCTTACTGTTGGACATCCATTTTACAATAT  
>HPV41\_Nu\_9626041\_nt5647\_L1\_Tile|1  
TCCTCCATGCTGCCACTGACCGTTTGCTTACTGTTGGACATCCATTTTACAATATTACTA  
>HPV41\_Nu\_9626041\_nt5657\_L1\_Tile|1  
TGCCACTGACCGTTTGCTTACTGTTGGACATCCATTTTACAATATTACTAATGCGGATGG  
>HPV41\_Nu\_9626041\_nt5662\_L1\_Tile|2  
CTGACCGTTTGCTTACTGTTGGACATCCATTTTACAATATTACTAATGCGGATGGCAAAG  
>HPV41\_Nu\_9626041\_nt5672\_L1\_Tile|1  
GCTTACTGTTGGACATCCATTTTACAATATTACTAATGCGGATGGCAAAGAGGTGGTCCC  
>HPV41\_Nu\_9626041\_nt5682\_L1\_Tile|2  
GGACATCCATTTTACAATATTACTAATGCGGATGGCAAAGAGGTGGTCCCTAAAGTTTCC  
>HPV41\_Nu\_9626041\_nt5687\_L1\_Tile|1  
TCCATTTTACAATATTACTAATGCGGATGGCAAAGAGGTGGTCCCTAAAGTTTCCTCTAA  
>HPV41\_Nu\_9626041\_nt5692\_L1\_Tile|1  
TTTACAATATTACTAATGCGGATGGCAAAGAGGTGGTCCCTAAAGTTTCCTCTAATCAGT  
>HPV41\_Nu\_9626041\_nt5697\_L1\_Tile|1  
AATATTACTAATGCGGATGGCAAAGAGGTGGTCCCTAAAGTTTCCTCTAATCAGTTCAGG  
>HPV41\_Nu\_9626041\_nt5707\_L1\_Tile|1  
ATGCGGATGGCAAAGAGGTGGTCCCTAAAGTTTCCTCTAATCAGTTCAGGGCCTTCCGTG  
>HPV41\_Nu\_9626041\_nt5722\_L1\_Tile|2  
AGGTGGTCCCTAAAGTTTCCTCTAATCAGTTCAGGGCCTTCCGTGTCCGTTTCCCAAATC  
>HPV41\_Nu\_9626041\_nt5727\_L1\_Tile|1  
GTCCCTAAAGTTTCCTCTAATCAGTTCAGGGCCTTCCGTGTCCGTTTCCCAAATCCCAAT  
>HPV41\_Nu\_9626041\_nt5732\_L1\_Tile|1  
TAAAGTTTCCTCTAATCAGTTCAGGGCCTTCCGTGTCCGTTTCCCAAATCCCAATACCTT  
>HPV41\_Nu\_9626041\_nt5737\_L1\_Tile|1  
TTTCCTCTAATCAGTTCAGGGCCTTCCGTGTCCGTTTCCCAAATCCCAATACCTTTGCAT  
>HPV41\_Nu\_9626041\_nt5742\_L1\_Tile|2  
TCTAATCAGTTCAGGGCCTTCCGTGTCCGTTTCCCAAATCCCAATACCTTTGCATTTTGT  
>HPV41\_Nu\_9626041\_nt5747\_L1\_Tile|1  
TCAGTTCAGGGCCTTCCGTGTCCGTTTCCCAAATCCCAATACCTTTGCATTTTGTGATAA  
>HPV41\_Nu\_9626041\_nt5757\_L1\_Tile|1  
GCCTTCCGTGTCCGTTTCCCAAATCCCAATACCTTTGCATTTTGTGATAAGTCCCTTTTT  
>HPV41\_Nu\_9626041\_nt5762\_L1\_Tile|2  
CCGTGTCCGTTTCCCAAATCCCAATACCTTTGCATTTTGTGATAAGTCCCTTTTTTAACCC

>HPV41\_Nu\_9626041\_nt5772\_L1\_Tile|1  
TTCCCAAATCCCAATACCTTTGCATTTTGTGATAAGTCCCTTTTAAACCCTGACAAGGAG  
>HPV41\_Nu\_9626041\_nt5777\_L1\_Tile|1  
AAATCCCAAATACCTTTGCATTTTGTGATAAGTCCCTTTTAAACCCTGACAAGGAGCGTCT  
>HPV41\_Nu\_9626041\_nt5782\_L1\_Tile|2  
CCAATACCTTTGCATTTTGTGATAAGTCCCTTTTAAACCCTGACAAGGAGCGTCTGGTCT  
>HPV41\_Nu\_9626041\_nt5792\_L1\_Tile|1  
TGCATTTTGTGATAAGTCCCTTTTAAACCCTGACAAGGAGCGTCTGGTCTGGGGTATTCTG  
>HPV41\_Nu\_9626041\_nt5852\_L1\_Tile|1  
TGGGATTGAGGTTTCTAGGGGACAGCCCTTAGGTATTGGTGTAACAGGGAACCCTTTTTT  
>HPV41\_Nu\_9626041\_nt5857\_L1\_Tile|1  
TTGAGGTTTCTAGGGGACAGCCCTTAGGTATTGGTGTAACAGGGAACCCTTTTTTTAATA  
>HPV41\_Nu\_9626041\_nt5862\_L1\_Tile|2  
GTTTCTAGGGGACAGCCCTTAGGTATTGGTGTAACAGGGAACCCTTTTTTTAATAAGTTT  
>HPV41\_Nu\_9626041\_nt5882\_L1\_Tile|2  
AGGTATTGGTGTAACAGGGAACCCTTTTTTTAATAAGTTTGATGATGCTGAAAATCCCTA  
>HPV41\_Nu\_9626041\_nt5887\_L1\_Tile|1  
TTGGTGTAACAGGGAACCCTTTTTTTAATAAGTTTGATGATGCTGAAAATCCCTACAATG  
>HPV41\_Nu\_9626041\_nt5892\_L1\_Tile|1  
GTAACAGGGAACCCTTTTTTTAATAAGTTTGATGATGCTGAAAATCCCTACAATGGTATA  
>HPV41\_Nu\_9626041\_nt5897\_L1\_Tile|1  
AGGGAACCCTTTTTTTAATAAGTTTGATGATGCTGAAAATCCCTACAATGGTATAAACAA  
>HPV41\_Nu\_9626041\_nt5902\_L1\_Tile|2  
ACCCTTTTTTTAATAAGTTTGATGATGCTGAAAATCCCTACAATGGTATAAACAAAAATA  
>HPV41\_Nu\_9626041\_nt5907\_L1\_Tile|1  
TTTTTTAATAAGTTTGATGATGCTGAAAATCCCTACAATGGTATAAACAAAAATAACATT  
>HPV41\_Nu\_9626041\_nt5912\_L1\_Tile|1  
TAATAAGTTTGATGATGCTGAAAATCCCTACAATGGTATAAACAAAAATAACATTACTGA  
>HPV41\_Nu\_9626041\_nt5917\_L1\_Tile|1  
AGTTTGATGATGCTGAAAATCCCTACAATGGTATAAACAAAAATAACATTACTGACCAAG  
>HPV41\_Nu\_9626041\_nt5922\_L1\_Tile|2  
GATGATGCTGAAAATCCCTACAATGGTATAAACAAAAATAACATTACTGACCAAGGTTCA  
>HPV41\_Nu\_9626041\_nt5927\_L1\_Tile|1  
TGCTGAAAATCCCTACAATGGTATAAACAAAAATAACATTACTGACCAAGGTTGAGACTC  
>HPV41\_Nu\_9626041\_nt5932\_L1\_Tile|1  
AAAATCCCTACAATGGTATAAACAAAAATAACATTACTGACCAAGGTTGAGACTCAAGGT  
>HPV41\_Nu\_9626041\_nt5937\_L1\_Tile|1  
CCCTACAATGGTATAAACAAAAATAACATTACTGACCAAGGTTGAGACTCAAGGTTGAGC  
>HPV41\_Nu\_9626041\_nt5942\_L1\_Tile|2  
CAATGGTATAAACAAAAATAACATTACTGACCAAGGTTGAGACTCAAGGTTGAGCATTCG  
>HPV41\_Nu\_9626041\_nt5982\_L1\_Tile|2  
GACTCAAGGTTGAGCATTCGATTTGACCCTAAGCAAACACAGCTGCTGATAGTAGGTGCT  
>HPV41\_Nu\_9626041\_nt5987\_L1\_Tile|1  
AAGGTTGAGCATTCGATTTGACCCTAAGCAAACACAGCTGCTGATAGTAGGTGCTAAACC  
>HPV41\_Nu\_9626041\_nt5997\_L1\_Tile|1  
ATTGCATTTGACCCTAAGCAAACACAGCTGCTGATAGTAGGTGCTAAACCTGCAAAGGGT  
>HPV41\_Nu\_9626041\_nt6002\_L1\_Tile|2  
ATTTGACCCTAAGCAAACACAGCTGCTGATAGTAGGTGCTAAACCTGCAAAGGGTGAGTA  
>HPV41\_Nu\_9626041\_nt6017\_L1\_Tile|1  
AACACAGCTGCTGATAGTAGGTGCTAAACCTGCAAAGGGTGAGTACTGGGACGTTGCTGC  
>HPV41\_Nu\_9626041\_nt6022\_L1\_Tile|2  
AGCTGCTGATAGTAGGTGCTAAACCTGCAAAGGGTGAGTACTGGGACGTTGCTGCAACAT  
>HPV41\_Nu\_9626041\_nt6027\_L1\_Tile|1  
CTGATAGTAGGTGCTAAACCTGCAAAGGGTGAGTACTGGGACGTTGCTGCAACATGTGAA  
>HPV41\_Nu\_9626041\_nt6032\_L1\_Tile|1

AGTAGGTGCTAAACCTGCAAAGGGTGAGTACTGGGACGTTGCTGCAACATGTGAAAACCC  
>HPV41\_Nu\_9626041\_nt6057\_L1\_Tile|1  
GAGTACTGGGACGTTGCTGCAACATGTGAAAACCCCTCCACTGACCAAAGCAGATGACAAA  
>HPV41\_Nu\_9626041\_nt6077\_L1\_Tile|1  
AACATGTGAAAACCCCTCCACTGACCAAAGCAGATGACAAATGTCCTGCTCTAGAGCTTAA  
>HPV41\_Nu\_9626041\_nt6082\_L1\_Tile|2  
GTGAAAACCCCTCCACTGACCAAAGCAGATGACAAATGTCCTGCTCTAGAGCTTAAGTCCT  
>HPV41\_Nu\_9626041\_nt6087\_L1\_Tile|1  
AACCCCTCCACTGACCAAAGCAGATGACAAATGTCCTGCTCTAGAGCTTAAGTCCTCATAC  
>HPV41\_Nu\_9626041\_nt6092\_L1\_Tile|1  
TCCACTGACCAAAGCAGATGACAAATGTCCTGCTCTAGAGCTTAAGTCCTCATACATTGA  
>HPV41\_Nu\_9626041\_nt6102\_L1\_Tile|2  
AAAGCAGATGACAAATGTCCTGCTCTAGAGCTTAAGTCCTCATACATTGAGGATGCAGAC  
>HPV41\_Nu\_9626041\_nt6112\_L1\_Tile|1  
ACAAATGTCCTGCTCTAGAGCTTAAGTCCTCATACATTGAGGATGCAGACATGAGTGACA  
>HPV41\_Nu\_9626041\_nt6122\_L1\_Tile|2  
TGCTCTAGAGCTTAAGTCCTCATACATTGAGGATGCAGACATGAGTGACATAGGCCTGGG  
>HPV41\_Nu\_9626041\_nt6127\_L1\_Tile|1  
TAGAGCTTAAGTCCTCATACATTGAGGATGCAGACATGAGTGACATAGGCCTGGGAAACT  
>HPV41\_Nu\_9626041\_nt6132\_L1\_Tile|1  
CTTAAGTCCTCATACATTGAGGATGCAGACATGAGTGACATAGGCCTGGGAAACTTGAAT  
>HPV41\_Nu\_9626041\_nt6137\_L1\_Tile|1  
GTCCTCATACATTGAGGATGCAGACATGAGTGACATAGGCCTGGGAAACTTGAATTTTTTC  
>HPV41\_Nu\_9626041\_nt6147\_L1\_Tile|1  
ATTGAGGATGCAGACATGAGTGACATAGGCCTGGGAAACTTGAATTTTTTCTACACTGCAG  
>HPV41\_Nu\_9626041\_nt6152\_L1\_Tile|1  
GGATGCAGACATGAGTGACATAGGCCTGGGAAACTTGAATTTTTTCTACACTGCAGAGAAA  
>HPV41\_Nu\_9626041\_nt6157\_L1\_Tile|1  
CAGACATGAGTGACATAGGCCTGGGAAACTTGAATTTTTTCTACACTGCAGAGAAACAAAT  
>HPV41\_Nu\_9626041\_nt6162\_L1\_Tile|2  
ATGAGTGACATAGGCCTGGGAAACTTGAATTTTTTCTACACTGCAGAGAAACAAATCCGAT  
>HPV41\_Nu\_9626041\_nt6167\_L1\_Tile|1  
TGACATAGGCCTGGGAAACTTGAATTTTTTCTACACTGCAGAGAAACAAATCCGATGCCCC  
>HPV41\_Nu\_9626041\_nt6172\_L1\_Tile|1  
TAGGCCTGGGAAACTTGAATTTTTTCTACACTGCAGAGAAACAAATCCGATGCCCCATTAG  
>HPV41\_Nu\_9626041\_nt6177\_L1\_Tile|1  
CTGGGAAACTTGAATTTTTTCTACACTGCAGAGAAACAAATCCGATGCCCCATTAGATATT  
>HPV41\_Nu\_9626041\_nt6182\_L1\_Tile|2  
AAACTTGAATTTTTTCTACACTGCAGAGAAACAAATCCGATGCCCCATTAGATATTGTGGA  
>HPV41\_Nu\_9626041\_nt6187\_L1\_Tile|1  
TGAATTTTTTCTACACTGCAGAGAAACAAATCCGATGCCCCATTAGATATTGTGGATTCTA  
>HPV41\_Nu\_9626041\_nt6192\_L1\_Tile|1  
TTTTTCTACACTGCAGAGAAACAAATCCGATGCCCCATTAGATATTGTGGATTCTATCTGC  
>HPV41\_Nu\_9626041\_nt6197\_L1\_Tile|1  
TACACTGCAGAGAAACAAATCCGATGCCCCATTAGATATTGTGGATTCTATCTGCAAATA  
>HPV41\_Nu\_9626041\_nt6202\_L1\_Tile|2  
TGCAGAGAAACAAATCCGATGCCCCATTAGATATTGTGGATTCTATCTGCAAATATCCTG  
>HPV41\_Nu\_9626041\_nt6207\_L1\_Tile|1  
AGAAACAAATCCGATGCCCCATTAGATATTGTGGATTCTATCTGCAAATATCCTGACTAC  
>HPV41\_Nu\_9626041\_nt6257\_L1\_Tile|1  
TCCTGACTACCTGCAAATGATAGAAGAACTATATGGAGACCACATGTTTTTCTATGTGCG  
>HPV41\_Nu\_9626041\_nt6267\_L1\_Tile|1  
CTGCAAATGATAGAAGAACTATATGGAGACCACATGTTTTTCTATGTGCGGCGTGAAGCT  
>HPV41\_Nu\_9626041\_nt6272\_L1\_Tile|1  
AATGATAGAAGAACTATATGGAGACCACATGTTTTTCTATGTGCGGCGTGAAGCTCTGTA

>HPV41\_Nu\_9626041\_nt6277\_L1\_Tile|1  
TAGAAGAACTATATGGAGACCACATGTTTTTCTATGTGCGGCGTGAAGCTCTGTATGCTA  
>HPV41\_Nu\_9626041\_nt6282\_L1\_Tile|2  
GAACTATATGGAGACCACATGTTTTTCTATGTGCGGCGTGAAGCTCTGTATGCTAGGCAT  
>HPV41\_Nu\_9626041\_nt6287\_L1\_Tile|1  
ATATGGAGACCACATGTTTTTCTATGTGCGGCGTGAAGCTCTGTATGCTAGGCATATAAT  
>HPV41\_Nu\_9626041\_nt6302\_L1\_Tile|2  
GTTTTTCTATGTGCGGCGTGAAGCTCTGTATGCTAGGCATATAATGCAACACGCGGGCAA  
>HPV41\_Nu\_9626041\_nt6307\_L1\_Tile|1  
TCTATGTGCGGCGTGAAGCTCTGTATGCTAGGCATATAATGCAACACGCGGGCAAGATGG  
>HPV41\_Nu\_9626041\_nt6317\_L1\_Tile|1  
GCGTGAAGCTCTGTATGCTAGGCATATAATGCAACACGCGGGCAAGATGGATGCTGAGCA  
>HPV41\_Nu\_9626041\_nt6322\_L1\_Tile|2  
AAGCTCTGTATGCTAGGCATATAATGCAACACGCGGGCAAGATGGATGCTGAGCAATTTTC  
>HPV41\_Nu\_9626041\_nt6327\_L1\_Tile|1  
CTGTATGCTAGGCATATAATGCAACACGCGGGCAAGATGGATGCTGAGCAATTTCCCACT  
>HPV41\_Nu\_9626041\_nt6332\_L1\_Tile|1  
TGCTAGGCATATAATGCAACACGCGGGCAAGATGGATGCTGAGCAATTTCCCACTTCTCT  
>HPV41\_Nu\_9626041\_nt6337\_L1\_Tile|1  
GGCATATAATGCAACACGCGGGCAAGATGGATGCTGAGCAATTTCCCACTTCTCTGTACA  
>HPV41\_Nu\_9626041\_nt6342\_L1\_Tile|2  
ATAATGCAACACGCGGGCAAGATGGATGCTGAGCAATTTCCCACTTCTCTGTACATAGAC  
>HPV41\_Nu\_9626041\_nt6352\_L1\_Tile|1  
ACGCGGGCAAGATGGATGCTGAGCAATTTCCCACTTCTCTGTACATAGACTCCTCTGTAG  
>HPV41\_Nu\_9626041\_nt6357\_L1\_Tile|1  
GGCAAGATGGATGCTGAGCAATTTCCCACTTCTCTGTACATAGACTCCTCTGTAGAAGGT  
>HPV41\_Nu\_9626041\_nt6362\_L1\_Tile|2  
GATGGATGCTGAGCAATTTCCCACTTCTCTGTACATAGACTCCTCTGTAGAAGGTGAGAA  
>HPV41\_Nu\_9626041\_nt6367\_L1\_Tile|1  
ATGCTGAGCAATTTCCCACTTCTCTGTACATAGACTCCTCTGTAGAAGGTGAGAAATTAA  
>HPV41\_Nu\_9626041\_nt6372\_L1\_Tile|1  
GAGCAATTTCCCACTTCTCTGTACATAGACTCCTCTGTAGAAGGTGAGAAATTAAATTCC  
>HPV41\_Nu\_9626041\_nt6377\_L1\_Tile|1  
ATTTCCCACTTCTCTGTACATAGACTCCTCTGTAGAAGGTGAGAAATTAAATTCCTTGCA  
>HPV41\_Nu\_9626041\_nt6387\_L1\_Tile|1  
TCTCTGTACATAGACTCCTCTGTAGAAGGTGAGAAATTAAATTCCTTGCAGCGCACTGAT  
>HPV41\_Nu\_9626041\_nt6392\_L1\_Tile|1  
GTACATAGACTCCTCTGTAGAAGGTGAGAAATTAAATTCCTTGCAGCGCACTGATAGGTA  
>HPV41\_Nu\_9626041\_nt6397\_L1\_Tile|1  
TAGACTCCTCTGTAGAAGGTGAGAAATTAAATTCCTTGCAGCGCACTGATAGGTATTTCA  
>HPV41\_Nu\_9626041\_nt6402\_L1\_Tile|2  
TCCTCTGTAGAAGGTGAGAAATTAAATTCCTTGCAGCGCACTGATAGGTATTTTCATGACA  
>HPV41\_Nu\_9626041\_nt6407\_L1\_Tile|1  
TGTAGAAGGTGAGAAATTAAATTCCTTGCAGCGCACTGATAGGTATTTTCATGACACCCAG  
>HPV41\_Nu\_9626041\_nt6417\_L1\_Tile|1  
GAGAAATTAAATTCCTTGCAGCGCACTGATAGGTATTTTCATGACACCCAGCGGCTCCCTG  
>HPV41\_Nu\_9626041\_nt6422\_L1\_Tile|2  
ATTAAATTCCTTGCAGCGCACTGATAGGTATTTTCATGACACCCAGCGGCTCCCTGGTAGC  
>HPV41\_Nu\_9626041\_nt6427\_L1\_Tile|1  
ATTCCTTGCAGCGCACTGATAGGTATTTTCATGACACCCAGCGGCTCCCTGGTAGCTACTG  
>HPV41\_Nu\_9626041\_nt6447\_L1\_Tile|1  
AGGTATTTTCATGACACCCAGCGGCTCCCTGGTAGCTACTGAGCAGCAGCTGTTTAAACAGG  
>HPV41\_Nu\_9626041\_nt6457\_L1\_Tile|1  
TGACACCCAGCGGCTCCCTGGTAGCTACTGAGCAGCAGCTGTTTAAACAGGCCCTTTTGGC  
>HPV41\_Nu\_9626041\_nt6517\_L1\_Tile|1

TGCAGAGATCCCAGGGCCATAACAATGGCATACTGTGGCACAACGAGGCCTTTGTAACAT  
>HPV41\_Nu\_9626041\_nt6522\_L1\_Tile|2  
AGATCCCAGGGCCATAACAATGGCATACTGTGGCACAACGAGGCCTTTGTAACATTGGTT  
>HPV41\_Nu\_9626041\_nt6547\_L1\_Tile|1  
TACTGTGGCACAACGAGGCCTTTGTAACATTGGTTGACACTACCAGGGGAACATACTTTA  
>HPV41\_Nu\_9626041\_nt6552\_L1\_Tile|1  
TGGCACAACGAGGCCTTTGTAACATTGGTTGACACTACCAGGGGAACATACTTTACCATC  
>HPV41\_Nu\_9626041\_nt6557\_L1\_Tile|1  
CAACGAGGCCTTTGTAACATTGGTTGACACTACCAGGGGAACATACTTTACCATCAGTGT  
>HPV41\_Nu\_9626041\_nt6567\_L1\_Tile|1  
TTTGTAACATTGGTTGACACTACCAGGGGAACATACTTTACCATCAGTGTTCCTGAGGGG  
>HPV41\_Nu\_9626041\_nt6577\_L1\_Tile|1  
TGGTTGACACTACCAGGGGAACATACTTTACCATCAGTGTTCCTGAGGGGGATGCTTCTT  
>HPV41\_Nu\_9626041\_nt6582\_L1\_Tile|2  
GACACTACCAGGGGAACATACTTTACCATCAGTGTTCCTGAGGGGGATGCTTCTTCATAT  
>HPV41\_Nu\_9626041\_nt6587\_L1\_Tile|1  
TACCAGGGGAACATACTTTACCATCAGTGTTCCTGAGGGGGATGCTTCTTCATATAACAA  
>HPV41\_Nu\_9626041\_nt6592\_L1\_Tile|1  
GGGGAACTAACTTTACCATCAGTGTTCCTGAGGGGGATGCTTCTTCATATAACAATTCTA  
>HPV41\_Nu\_9626041\_nt6597\_L1\_Tile|1  
ACTAACTTTACCATCAGTGTTCCTGAGGGGGATGCTTCTTCATATAACAATTCTAAGTTT  
>HPV41\_Nu\_9626041\_nt6602\_L1\_Tile|2  
CTTTACCATCAGTGTTCCTGAGGGGGATGCTTCTTCATATAACAATTCTAAGTTTTTTTGA  
>HPV41\_Nu\_9626041\_nt6607\_L1\_Tile|1  
CCATCAGTGTTCCTGAGGGGGATGCTTCTTCATATAACAATTCTAAGTTTTTTTGAGTTTT  
>HPV41\_Nu\_9626041\_nt6627\_L1\_Tile|1  
GATGCTTCTTCATATAACAATTCTAAGTTTTTTTGAGTTTTTTAAGGCACACCGAGGAGTTT  
>HPV41\_Nu\_9626041\_nt6632\_L1\_Tile|1  
TTCTTCATATAACAATTCTAAGTTTTTTTGAGTTTTTTAAGGCACACCGAGGAGTTTCAGCT  
>HPV41\_Nu\_9626041\_nt6637\_L1\_Tile|1  
CATATAACAATTCTAAGTTTTTTTGAGTTTTTTAAGGCACACCGAGGAGTTTCAGCTTGCCT  
>HPV41\_Nu\_9626041\_nt6642\_L1\_Tile|2  
AACAATTCTAAGTTTTTTTGAGTTTTTTAAGGCACACCGAGGAGTTTCAGCTTGCCTTTATT  
>HPV41\_Nu\_9626041\_nt6657\_L1\_Tile|1  
TTTGAGTTTTTTAAGGCACACCGAGGAGTTTCAGCTTGCCTTTATTCTACAGCTGTGTAAG  
>HPV41\_Nu\_9626041\_nt6662\_L1\_Tile|2  
GTTTTTTAAGGCACACCGAGGAGTTTCAGCTTGCCTTTATTCTACAGCTGTGTAAGGTAGA  
>HPV41\_Nu\_9626041\_nt6667\_L1\_Tile|1  
TAAGGCACACCGAGGAGTTTCAGCTTGCCTTTATTCTACAGCTGTGTAAGGTAGACCTTA  
>HPV41\_Nu\_9626041\_nt6672\_L1\_Tile|1  
CACACCGAGGAGTTTCAGCTTGCCTTTATTCTACAGCTGTGTAAGGTAGACCTTACCCCT  
>HPV41\_Nu\_9626041\_nt6677\_L1\_Tile|1  
CGAGGAGTTTCAGCTTGCCTTTATTCTACAGCTGTGTAAGGTAGACCTTACCCCTGAGAA  
>HPV41\_Nu\_9626041\_nt6687\_L1\_Tile|1  
CAGCTTGCCTTTATTCTACAGCTGTGTAAGGTAGACCTTACCCCTGAGAATTTGGCTTAC  
>HPV41\_Nu\_9626041\_nt6692\_L1\_Tile|1  
TGCCTTTATTCTACAGCTGTGTAAGGTAGACCTTACCCCTGAGAATTTGGCTTACATACA  
>HPV41\_Nu\_9626041\_nt6697\_L1\_Tile|1  
TTATTCTACAGCTGTGTAAGGTAGACCTTACCCCTGAGAATTTGGCTTACATACACACAA  
>HPV41\_Nu\_9626041\_nt6702\_L1\_Tile|2  
CTACAGCTGTGTAAGGTAGACCTTACCCCTGAGAATTTGGCTTACATACACACAATGGAT  
>HPV41\_Nu\_9626041\_nt6707\_L1\_Tile|1  
GCTGTGTAAGGTAGACCTTACCCCTGAGAATTTGGCTTACATACACACAATGGATCCATC  
>HPV41\_Nu\_9626041\_nt6712\_L1\_Tile|1  
GTAAGGTAGACCTTACCCCTGAGAATTTGGCTTACATACACACAATGGATCCATCCATTA

>HPV41\_Nu\_9626041\_nt6722\_L1\_Tile|2  
CCTTACCCCTGAGAATTTGGCTTACATACACACAATGGATCCATCCATTATTGAAGACTG  
>HPV41\_Nu\_9626041\_nt6732\_L1\_Tile|1  
GAGAATTTGGCTTACATACACACAATGGATCCATCCATTATTGAAGACTGGCATTTAGCT  
>HPV41\_Nu\_9626041\_nt6742\_L1\_Tile|2  
CTTACATACACACAATGGATCCATCCATTATTGAAGACTGGCATTTAGCTGTCACCTTCAC  
>HPV41\_Nu\_9626041\_nt6747\_L1\_Tile|1  
ATACACACAATGGATCCATCCATTATTGAAGACTGGCATTTAGCTGTCACCTTCACCTCCC  
>HPV41\_Nu\_9626041\_nt6752\_L1\_Tile|1  
CACAATGGATCCATCCATTATTGAAGACTGGCATTTAGCTGTCACCTTCACCTCCCAATTC  
>HPV41\_Nu\_9626041\_nt6757\_L1\_Tile|1  
TGGATCCATCCATTATTGAAGACTGGCATTTAGCTGTCACCTTCACCTCCCAATTCTGTAC  
>HPV41\_Nu\_9626041\_nt6762\_L1\_Tile|2  
CCATCCATTATTGAAGACTGGCATTTAGCTGTCACCTTCACCTCCCAATTCTGTACTGGAG  
>HPV41\_Nu\_9626041\_nt6767\_L1\_Tile|1  
CATTATTGAAGACTGGCATTTAGCTGTCACCTTCACCTCCCAATTCTGTACTGGAGGATCA  
>HPV41\_Nu\_9626041\_nt6772\_L1\_Tile|1  
TTGAAGACTGGCATTTAGCTGTCACCTTCACCTCCCAATTCTGTACTGGAGGATCATTATA  
>HPV41\_Nu\_9626041\_nt6777\_L1\_Tile|1  
GACTGGCATTAGCTGTCACCTTCACCTCCCAATTCTGTACTGGAGGATCATTATAGGTAC  
>HPV41\_Nu\_9626041\_nt6782\_L1\_Tile|2  
GCATTTAGCTGTCACCTTCACCTCCCAATTCTGTACTGGAGGATCATTATAGGTACATACT  
>HPV41\_Nu\_9626041\_nt6787\_L1\_Tile|1  
TAGCTGTCACCTTCACCTCCCAATTCTGTACTGGAGGATCATTATAGGTACATACTGTCCA  
>HPV41\_Nu\_9626041\_nt6792\_L1\_Tile|1  
GTCACCTTCACCTCCCAATTCTGTACTGGAGGATCATTATAGGTACATACTGTCCATTGCA  
>HPV41\_Nu\_9626041\_nt6797\_L1\_Tile|1  
TTCACCTCCCAATTCTGTACTGGAGGATCATTATAGGTACATACTGTCCATTGCAACTAA  
>HPV41\_Nu\_9626041\_nt6802\_L1\_Tile|2  
CTCCCAATTCTGTACTGGAGGATCATTATAGGTACATACTGTCCATTGCAACTAAATGTC  
>HPV41\_Nu\_9626041\_nt6807\_L1\_Tile|1  
AATTCTGTACTGGAGGATCATTATAGGTACATACTGTCCATTGCAACTAAATGTCCCTCT  
>HPV41\_Nu\_9626041\_nt6812\_L1\_Tile|1  
TGTACTGGAGGATCATTATAGGTACATACTGTCCATTGCAACTAAATGTCCCTCTAAGGA  
>HPV41\_Nu\_9626041\_nt6822\_L1\_Tile|2  
GATCATTATAGGTACATACTGTCCATTGCAACTAAATGTCCCTCTAAGGATGCAGATGAT  
>HPV41\_Nu\_9626041\_nt6832\_L1\_Tile|1  
GGTACATACTGTCCATTGCAACTAAATGTCCCTCTAAGGATGCAGATGATACCTCCACTG  
>HPV41\_Nu\_9626041\_nt6837\_L1\_Tile|1  
ATACTGTCCATTGCAACTAAATGTCCCTCTAAGGATGCAGATGATACCTCCACTGACCCA  
>HPV41\_Nu\_9626041\_nt6872\_L1\_Tile|1  
TGCAGATGATACCTCCACTGACCCATACAAAGATCTTAAGTTTTGGGAGGTTGATCTACG  
>HPV41\_Nu\_9626041\_nt6877\_L1\_Tile|1  
ATGATACCTCCACTGACCCATACAAAGATCTTAAGTTTTGGGAGGTTGATCTACGGGATC  
>HPV41\_Nu\_9626041\_nt6887\_L1\_Tile|1  
CACTGACCCATACAAAGATCTTAAGTTTTGGGAGGTTGATCTACGGGATCGTATGACAGA  
>HPV41\_Nu\_9626041\_nt6927\_L1\_Tile|1  
CTACGGGATCGTATGACAGAGCAATTGGACCAGACTCCCCTTGGCAGGAAGTTTTTGT  
>HPV41\_Nu\_9626041\_nt6932\_L1\_Tile|1  
GGATCGTATGACAGAGCAATTGGACCAGACTCCCCTTGGCAGGAAGTTTTTGTTCAAAC  
>HPV41\_Nu\_9626041\_nt6942\_L1\_Tile|2  
ACAGAGCAATTGGACCAGACTCCCCTTGGCAGGAAGTTTTTGTTCAAACTGGTATCACT  
>HPV41\_Nu\_9626041\_nt6947\_L1\_Tile|1  
GCAATTGGACCAGACTCCCCTTGGCAGGAAGTTTTTGTTCAAACTGGTATCACTCAGTC  
>HPV41\_Nu\_9626041\_nt6952\_L1\_Tile|1

TGGACCAGACTCCCCTTGGCAGGAAGTTTTGTTTCAAACCTGGTATCACTCAGTCATCAT  
>HPV41\_Nu\_9626041\_nt6962\_L1\_Tile|2  
TCCCCTTGGCAGGAAGTTTTGTTTCAAACCTGGTATCACTCAGTCATCATCAAATAAGCG  
>HPV41\_Nu\_9626041\_nt6967\_L1\_Tile|1  
TTGGCAGGAAGTTTTGTTTCAAACCTGGTATCACTCAGTCATCATCAAATAAGCGGGTGT  
>HPV41\_Nu\_9626041\_nt6972\_L1\_Tile|1  
AGGAAGTTTTGTTTCAAACCTGGTATCACTCAGTCATCATCAAATAAGCGGGTGTCCACG  
>HPV41\_Nu\_9626041\_nt6977\_L1\_Tile|1  
GTTTTTGTTCCAAACCTGGTATCACTCAGTCATCATCAAATAAGCGGGTGTCCACGCAGTC  
>HPV41\_Nu\_9626041\_nt6982\_L1\_Tile|2  
TGTTTCAAACCTGGTATCACTCAGTCATCATCAAATAAGCGGGTGTCCACGCAGTCTACTG  
>HPV41\_Nu\_9626041\_nt6987\_L1\_Tile|1  
CAAACCTGGTATCACTCAGTCATCATCAAATAAGCGGGTGTCCACGCAGTCTACTGCCCTT  
>HPV41\_Nu\_9626041\_nt6992\_L1\_Tile|1  
TGGTATCACTCAGTCATCATCAAATAAGCGGGTGTCCACGCAGTCTACTGCCCTTACTAC  
>HPV41\_Nu\_9626041\_nt6997\_L1\_Tile|1  
TCACTCAGTCATCATCAAATAAGCGGGTGTCCACGCAGTCTACTGCCCTTACTACCTACA  
>HPV41\_Nu\_9626041\_nt7012\_L1\_Tile|1  
CAAATAAGCGGGTGTCCACGCAGTCTACTGCCCTTACTACCTACAGGCGGCCTACTAAGC  
>HPV41\_Nu\_9626041\_nt7022\_L1\_Tile|2  
GGTGTCCACGCAGTCTACTGCCCTTACTACCTACAGGCGGCCTACTAAGCGCCGCCGGAA  
>HPV41\_Nu\_9626041\_nt7029\_L1\_Tile|1  
ACGCAGTCTACTGCCCTTACTACCTACAGGCGGCCTACTAAGCGCCGCCGGAAAGGCTTAA  
>HPV42\_Alpha\_333211\_nt5942\_L1\_Tile|2  
CCATGCCAGCAGTTCTAGGCTATTGGTTGTTGGTCACCCTTATTACTCTATTACAAAAAG  
>HPV42\_Alpha\_333211\_nt5947\_L1\_Tile|1  
CCAGCAGTTCTAGGCTATTGGTTGTTGGTCACCCTTATTACTCTATTACAAAAAGGCCAA  
>HPV42\_Alpha\_333211\_nt5952\_L1\_Tile|1  
AGTTCTAGGCTATTGGTTGTTGGTCACCCTTATTACTCTATTACAAAAAGGCCAAATAAG  
>HPV42\_Alpha\_333211\_nt5957\_L1\_Tile|1  
TAGGCTATTGGTTGTTGGTCACCCTTATTACTCTATTACAAAAAGGCCAAATAAGACATC  
>HPV42\_Alpha\_333211\_nt5962\_L1\_Tile|2  
TATTGGTTGTTGGTCACCCTTATTACTCTATTACAAAAAGGCCAAATAAGACATCTATCC  
>HPV42\_Alpha\_333211\_nt5967\_L1\_Tile|1  
GTTGTTGGTCACCCTTATTACTCTATTACAAAAAGGCCAAATAAGACATCTATCCCCAAA  
>HPV42\_Alpha\_333211\_nt5972\_L1\_Tile|1  
TGGTCACCCTTATTACTCTATTACAAAAAGGCCAAATAAGACATCTATCCCCAAAGTGTC  
>HPV42\_Alpha\_333211\_nt5977\_L1\_Tile|1  
ACCCTTATTACTCTATTACAAAAAGGCCAAATAAGACATCTATCCCCAAAGTGTCTGGTT  
>HPV42\_Alpha\_333211\_nt5982\_L1\_Tile|2  
TATTACTCTATTACAAAAAGGCCAAATAAGACATCTATCCCCAAAGTGTCTGGTTTACAG  
>HPV42\_Alpha\_333211\_nt5992\_L1\_Tile|1  
TTACAAAAAGGCCAAATAAGACATCTATCCCCAAAGTGTCTGGTTTACAGTACAGAGTAT  
>HPV42\_Alpha\_333211\_nt5997\_L1\_Tile|1  
AAAAGGCCAAATAAGACATCTATCCCCAAAGTGTCTGGTTTACAGTACAGAGTATTTAGA  
>HPV42\_Alpha\_333211\_nt6002\_L1\_Tile|2  
GCCAAATAAGACATCTATCCCCAAAGTGTCTGGTTTACAGTACAGAGTATTTAGAGTTAG  
>HPV42\_Alpha\_333211\_nt6007\_L1\_Tile|1  
ATAAGACATCTATCCCCAAAGTGTCTGGTTTACAGTACAGAGTATTTAGAGTTAGGCTCC  
>HPV42\_Alpha\_333211\_nt6052\_L1\_Tile|1  
TTAGAGTTAGGCTCCCTGATCCTAATAAGTTTACATTGCCTGAAACTAATTTATATAACC  
>HPV42\_Alpha\_333211\_nt6217\_L1\_Tile|1  
ATACTGAAAAATGCGCCTACATATGGTGGAGGCCCTGGTACAGACAATAGGGAAAAATGTTT  
>HPV42\_Alpha\_333211\_nt6222\_L1\_Tile|2  
GAAAAATGCGCCTACATATGGTGGAGGCCCTGGTACAGACAATAGGGAAAAATGTTTCTATG



>HPV42\_Alpha\_333211\_nt6347\_L1\_Tile|1  
AGGTACTGCCTGTACACCACAGTCCAATGGTGACTGCCCACCATTAGAATTAAAAAATAG  
>HPV42\_Alpha\_333211\_nt6352\_L1\_Tile|1  
CTGCCTGTACACCACAGTCCAATGGTGACTGCCCACCATTAGAATTAAAAAATAGTTTTA  
>HPV42\_Alpha\_333211\_nt6357\_L1\_Tile|1  
TGTACACCACAGTCCAATGGTGACTGCCCACCATTAGAATTAAAAAATAGTTTTATTTCAG  
>HPV42\_Alpha\_333211\_nt6422\_L1\_Tile|2  
GGATATGGTGGATGTAGGGTTTGGGGCACTAGATTTTGGTGCTTTACAATCCTCCAAAGC  
>HPV42\_Alpha\_333211\_nt6442\_L1\_Tile|2  
TTGGGGCACTAGATTTTGGTGCTTTACAATCCTCCAAAGCTGAGGTACCTTTGGATATTG  
>HPV42\_Alpha\_333211\_nt6447\_L1\_Tile|1  
GCACTAGATTTTGGTGCTTTACAATCCTCCAAAGCTGAGGTACCTTTGGATATTGTAAAT  
>HPV42\_Alpha\_333211\_nt6452\_L1\_Tile|1  
AGATTTTGGTGCTTTACAATCCTCCAAAGCTGAGGTACCTTTGGATATTGTAAATTCAAT  
>HPV42\_Alpha\_333211\_nt6457\_L1\_Tile|1  
TTGGTGCTTTACAATCCTCCAAAGCTGAGGTACCTTTGGATATTGTAAATTCAATTACTA  
>HPV42\_Alpha\_333211\_nt6462\_L1\_Tile|2  
GCTTTACAATCCTCCAAAGCTGAGGTACCTTTGGATATTGTAAATTCAATTACTAAATAT  
>HPV42\_Alpha\_333211\_nt6467\_L1\_Tile|1  
ACAATCCTCCAAAGCTGAGGTACCTTTGGATATTGTAAATTCAATTACTAAATATCCTGA  
>HPV42\_Alpha\_333211\_nt6472\_L1\_Tile|1  
CCTCCAAAGCTGAGGTACCTTTGGATATTGTAAATTCAATTACTAAATATCCTGATTACT  
>HPV42\_Alpha\_333211\_nt6477\_L1\_Tile|1  
AAAGCTGAGGTACCTTTGGATATTGTAAATTCAATTACTAAATATCCTGATTACTTAAAA  
>HPV42\_Alpha\_333211\_nt6612\_L1\_Tile|1  
AATAGGGCTGGCGCAATTGGTGAACCTGTACCTGATGAACGTATACCAAGGCTGCTAAT  
>HPV42\_Alpha\_333211\_nt6622\_L1\_Tile|2  
GCGCAATTGGTGAACCTGTACCTGATGAACGTATACCAAGGCTGCTAATAATGCATCTG  
>HPV42\_Alpha\_333211\_nt6632\_L1\_Tile|1  
TGAACCTGTACCTGATGAACGTATACCAAGGCTGCTAATAATGCATCTGGCAGACATAA  
>HPV42\_Alpha\_333211\_nt6642\_L1\_Tile|2  
CCTGATGAACGTATACCAAGGCTGCTAATAATGCATCTGGCAGACATAATTTAGGTAGT  
>HPV42\_Alpha\_333211\_nt6647\_L1\_Tile|1  
TGAACGTATACCAAGGCTGCTAATAATGCATCTGGCAGACATAATTTAGGTAGTAGTAT  
>HPV42\_Alpha\_333211\_nt6852\_L1\_Tile|1  
AGTACTAACATGACTTTGTGTGCCACTGCAACATCTGGTGATACATATACAGCTGCTAAT  
>HPV42\_Alpha\_333211\_nt6857\_L1\_Tile|1  
TAACATGACTTTGTGTGCCACTGCAACATCTGGTGATACATATACAGCTGCTAATTTTAA  
>HPV42\_Alpha\_333211\_nt6862\_L1\_Tile|2  
TGACTTTGTGTGCCACTGCAACATCTGGTGATACATATACAGCTGCTAATTTTAAGGAAT  
>HPV42\_Alpha\_333211\_nt6877\_L1\_Tile|1  
CTGCAACATCTGGTGATACATATACAGCTGCTAATTTTAAGGAATATTTAAGACATGCTG  
>HPV42\_Alpha\_333211\_nt6972\_L1\_Tile|1  
AAAATAACATTAACCTGTTGAAGTTATGTCATATATACACAATATGAATCCTAACATATTA  
>HPV42\_Alpha\_333211\_nt7057\_L1\_Tile|1  
CACCACCTTCAGGAACCTTTAGAAGATAGTTATAGGTATGTACAATCAGAAGCTATTCGCT  
>HPV42\_Alpha\_333211\_nt7062\_L1\_Tile|2  
CCTTCAGGAACCTTTAGAAGATAGTTATAGGTATGTACAATCAGAAGCTATTCGCTGTCAG  
>HPV42\_Alpha\_333211\_nt7067\_L1\_Tile|1  
AGGAACCTTTAGAAGATAGTTATAGGTATGTACAATCAGAAGCTATTCGCTGTCAGGCTAA  
>HPV42\_Alpha\_333211\_nt7072\_L1\_Tile|1  
CTTTAGAAGATAGTTATAGGTATGTACAATCAGAAGCTATTCGCTGTCAGGCTAAGGTAA  
>HPV42\_Alpha\_333211\_nt7077\_L1\_Tile|1  
GAAGATAGTTATAGGTATGTACAATCAGAAGCTATTCGCTGTCAGGCTAAGGTAACAACG  
>HPV42\_Alpha\_333211\_nt7082\_L1\_Tile|2

TAGTTATAGGTATGTACAATCAGAAGCTATTCGCTGTCAGGCTAAGGTAACAACGCCAGA  
>HPV42\_Alpha\_333211\_nt7097\_L1\_Tile|1  
ACAATCAGAAGCTATTCGCTGTCAGGCTAAGGTAACAACGCCAGAAAAAAGGATCCTTA  
>HPV42\_Alpha\_333211\_nt7102\_L1\_Tile|2  
CAGAAGCTATTCGCTGTCAGGCTAAGGTAACAACGCCAGAAAAAAGGATCCTTATTCAG  
>HPV42\_Alpha\_333211\_nt7107\_L1\_Tile|1  
GCTATTCGCTGTCAGGCTAAGGTAACAACGCCAGAAAAAAGGATCCTTATTCAGACTTT  
>HPV42\_Alpha\_333211\_nt7247\_L1\_Tile|1  
GGCCGGGTTGCGTGCAAGGCCTAAACTGTCTGTAGGTAAACGAAAGGCGTCTACAGCTAA  
>HPV42\_Alpha\_333211\_nt7252\_L1\_Tile|1  
GGTTGCGTGCAAGGCCTAAACTGTCTGTAGGTAAACGAAAGGCGTCTACAGCTAAATCTG  
>HPV42\_Alpha\_333211\_nt7257\_L1\_Tile|1  
CGTGCAAGGCCCTAAACTGTCTGTAGGTAAACGAAAGGCGTCTACAGCTAAATCTGTTTCT  
>HPV42\_Alpha\_333211\_nt7262\_L1\_Tile|2  
AAGGCCTAAACTGTCTGTAGGTAAACGAAAGGCGTCTACAGCTAAATCTGTTTCTTCAGC  
>HPV42\_Alpha\_333211\_nt7267\_L1\_Tile|1  
CTAAACTGTCTGTAGGTAAACGAAAGGCGTCTACAGCTAAATCTGTTTCTTCAGCTAAAC  
>HPV42\_Alpha\_333211\_nt7272\_L1\_Tile|1  
CTGTCTGTAGGTAAACGAAAGGCGTCTACAGCTAAATCTGTTTCTTCAGCTAAACGTAAG  
>HPV42\_Alpha\_333211\_nt7277\_L1\_Tile|1  
TGTAGGTAAACGAAAGGCGTCTACAGCTAAATCTGTTTCTTCAGCTAAACGTAAGAAAAC  
>HPV42\_Alpha\_333211\_nt7287\_L1\_Tile|1  
CGAAAGGCGTCTACAGCTAAATCTGTTTCTTCAGCTAAACGTAAGAAAACACACAAATAG  
>HPV43\_Alpha\_40804474\_nt5863\_L1\_Tile|1  
GCTGGCAGTTTCACGTTTGCTTGCAAGTGGGTCACCCATATTTCCCCCTTAAAAATTCCTCT  
>HPV43\_Alpha\_40804474\_nt5868\_L1\_Tile|1  
CAGTTCACGTTTGCTTGCAAGTGGGTCACCCATATTTCCCCCTTAAAAATTCCTCTGGTAA  
>HPV43\_Alpha\_40804474\_nt5873\_L1\_Tile|1  
CACGTTTGCTTGCAAGTGGGTCACCCATATTTCCCCCTTAAAAATTCCTCTGGTAAATAA  
>HPV43\_Alpha\_40804474\_nt5878\_L1\_Tile|1  
TTGCTTGCAAGTGGGTCACCCATATTTCCCCCTTAAAAATTCCTCTGGTAAATAACTGTA  
>HPV43\_Alpha\_40804474\_nt5883\_L1\_Tile|1  
TGCAGTGGGTCACCCATATTTCCCCCTTAAAAATTCCTCTGGTAAATAACTGTACCTAA  
>HPV43\_Alpha\_40804474\_nt5893\_L1\_Tile|1  
CACCCATATTTCCCCCTTAAAAATTCCTCTGGTAAATAACTGTACCTAAGGTTTCTGGT  
>HPV43\_Alpha\_40804474\_nt5898\_L1\_Tile|1  
ATATTTCCCCCTTAAAAATTCCTCTGGTAAATAACTGTACCTAAGGTTTCTGGTTATCA  
>HPV43\_Alpha\_40804474\_nt6518\_L1\_Tile|1  
TCCTTAGACATTTTTTTAATAAAGCTGGTAAACTGGCGACGTTGTGCCTTCCGATATGT  
>HPV43\_Alpha\_40804474\_nt6528\_L1\_Tile|1  
TTTTTTTAAATAAAGCTGGTAAACTGGCGACGTTGTGCCTTCCGATATGTATATTGCTGG  
>HPV43\_Alpha\_40804474\_nt6533\_L1\_Tile|1  
TTAATAAAGCTGGTAAACTGGCGACGTTGTGCCTTCCGATATGTATATTGCTGGCTCTA  
>HPV43\_Alpha\_40804474\_nt6538\_L1\_Tile|1  
AAAGCTGGTAAACTGGCGACGTTGTGCCTTCCGATATGTATATTGCTGGCTCTAATACC  
>HPV43\_Alpha\_40804474\_nt6543\_L1\_Tile|1  
TGGTAAACTGGCGACGTTGTGCCTTCCGATATGTATATTGCTGGCTCTAATACCAGGTC  
>HPV43\_Alpha\_40804474\_nt6548\_L1\_Tile|1  
AAACTGGCGACGTTGTGCCTTCCGATATGTATATTGCTGGCTCTAATACCAGGTCCAAAA  
>HPV43\_Alpha\_40804474\_nt6553\_L1\_Tile|1  
GGCGACGTTGTGCCTTCCGATATGTATATTGCTGGCTCTAATACCAGGTCCAAAATTGCA  
>HPV43\_Alpha\_40804474\_nt6558\_L1\_Tile|1  
CGTTGTGCCTTCCGATATGTATATTGCTGGCTCTAATACCAGGTCCAAAATTGCAGATAG  
>HPV43\_Alpha\_40804474\_nt6563\_L1\_Tile|1  
TGCCTTCCGATATGTATATTGCTGGCTCTAATACCAGGTCCAAAATTGCAGATAGTATAT

>HPV43\_Alpha\_40804474\_nt6568\_L1\_Tile|1  
TCCGATATGTATATTGCTGGCTCTAATACCAGGTCCAAAATTGCAGATAGTATATATTTTT  
>HPV43\_Alpha\_40804474\_nt6573\_L1\_Tile|1  
TATGTATATTGCTGGCTCTAATACCAGGTCCAAAATTGCAGATAGTATATATTTTTCTAC  
>HPV43\_Alpha\_40804474\_nt6578\_L1\_Tile|1  
ATATTGCTGGCTCTAATACCAGGTCCAAAATTGCAGATAGTATATATTTTTCTACACCCA  
>HPV43\_Alpha\_40804474\_nt6583\_L1\_Tile|1  
GCTGGCTCTAATACCAGGTCCAAAATTGCAGATAGTATATATTTTTCTACACCCAGTGGG  
>HPV43\_Alpha\_40804474\_nt6588\_L1\_Tile|1  
CTCTAATACCAGGTCCAAAATTGCAGATAGTATATATTTTTCTACACCCAGTGGGTCTTT  
>HPV43\_Alpha\_40804474\_nt6593\_L1\_Tile|1  
ATACCAGGTCCAAAATTGCAGATAGTATATATTTTTCTACACCCAGTGGGTCTTTGGTTA  
>HPV43\_Alpha\_40804474\_nt6598\_L1\_Tile|1  
AGGTCCAAAATTGCAGATAGTATATATTTTTCTACACCCAGTGGGTCTTTGGTTACTTCT  
>HPV43\_Alpha\_40804474\_nt6753\_L1\_Tile|1  
AGATACTACTCGTAGTACAACTTAACGTTATGTGCCTCTACTGACCCTACTGTGCCAG  
>HPV43\_Alpha\_40804474\_nt6788\_L1\_Tile|1  
CCTCTACTGACCCTACTGTGCCAGTACATATGACAATGCAAAGTTTAAGGAATACCTGC  
>HPV43\_Alpha\_40804474\_nt6888\_L1\_Tile|1  
ATGCATAATAACGCTAAACCCAGAGGTTATGACATATATTCATACTATGGATCCCACATT  
>HPV43\_Alpha\_40804474\_nt6893\_L1\_Tile|1  
TAATAACGCTAAACCCAGAGGTTATGACATATATTCATACTATGGATCCCACATTATTAG  
>HPV43\_Alpha\_40804474\_nt6973\_L1\_Tile|1  
TCCCCACCTGCCTCTGCTTCTTTGGAAGATACCTTATCGCTTTTTTGCTAACAAGGCCATT  
>HPV43\_Alpha\_40804474\_nt7068\_L1\_Tile|1  
GGATCCCTATAAAAAGTATACATTTTGGGATATAAATCTTACAGAAAAGTTTTCTGCACA  
>HPV43\_Alpha\_40804474\_nt7193\_L1\_Tile|1  
TAAAAACTGTAAAGCGTTCTGCACCATCCTCCTCTACGTCTGCCCCTGCCTCTAAACGCA  
>HPV43\_Alpha\_40804474\_nt7203\_L1\_Tile|1  
AAAGCGTTCTGCACCATCCTCCTCTACGTCTGCCCCTGCCTCTAAACGCAAAAAAACTAA  
>HPV44\_Alpha\_1020242\_nt6475\_L1\_Tile|1  
GCTGGAACAGTTGGTGAGGACGTTTCCCAGGATCTGGTTATTAAAAGTGCTAGTAAAAAT  
>HPV44\_Alpha\_1020242\_nt6480\_L1\_Tile|1  
AACAGTTGGTGAGGACGTTTCCCAGGATCTGGTTATTAAAAGTGCTAGTAAAAATACTGT  
>HPV44\_Alpha\_1020242\_nt6720\_L1\_Tile|1  
TGCCACTACACAGTCCCCTCCGTCTACATATACTAGTGAACAATATAAGCAATACATGCG  
>HPV45\_Alpha\_397022\_nt5731\_L1\_Tile|1  
ATTATTAACTGTAGGCAATCCATATTTTAGGGTTGTACCTAATGGTGCAGGTAATAAACA  
>HPV45\_Alpha\_397022\_nt5736\_L1\_Tile|1  
TAACTGTAGGCAATCCATATTTTAGGGTTGTACCTAATGGTGCAGGTAATAAACAGGCTG  
>HPV45\_Alpha\_397022\_nt5751\_L1\_Tile|1  
CATATTTTAGGGTTGTACCTAATGGTGCAGGTAATAAACAGGCTGTTCCCTAAGGTATCCG  
>HPV45\_Alpha\_397022\_nt5756\_L1\_Tile|1  
TTTAGGGTTGTACCTAATGGTGCAGGTAATAAACAGGCTGTTCCCTAAGGTATCCGCATAT  
>HPV45\_Alpha\_397022\_nt5761\_L1\_Tile|1  
GGTTGTACCTAATGGTGCAGGTAATAAACAGGCTGTTCCCTAAGGTATCCGCATATCAGTA  
>HPV45\_Alpha\_397022\_nt5971\_L1\_Tile|1  
TCCATTTTATAATAAATTGGATGATACAGAAAGTGCTCATGCAGCTACAGCTGTTATTAC  
>HPV45\_Alpha\_397022\_nt6136\_L1\_Tile|1  
TAAACCTGCACAATTGCAACCTGGTGACTGTCCTCCTTTGGAACCTAAAAACACCATTAT  
>HPV45\_Alpha\_397022\_nt6416\_L1\_Tile|1  
GACACAGTACCTACGGACCTATATATTAAAGGCACTAGCGCTAATATGCGTGAAACCCCT  
>HPV45\_Alpha\_397022\_nt6426\_L1\_Tile|1  
CTACGGACCTATATATTAAAGGCACTAGCGCTAATATGCGTGAAACCCCTGGCAGTTGTG  
>HPV45\_Alpha\_397022\_nt6936\_L1\_Tile|1

ATCCATATGATAAATTAAAGTTTTGGACTGTTGACCTAAAGGAAAAATTTTCCTCCGATT  
>HPV45\_Alpha\_397022\_nt6941\_L1\_Tile|1  
TATGATAAATTAAAGTTTTGGACTGTTGACCTAAAGGAAAAATTTTCCTCCGATTTGGAT  
>HPV45\_Alpha\_397022\_nt6946\_L1\_Tile|1  
TAAATTAAAGTTTTGGACTGTTGACCTAAAGGAAAAATTTTCCTCCGATTTGGATCAATA  
>HPV45\_Alpha\_397022\_nt7056\_L1\_Tile|1  
CCATAGGACCTCGTAAGCGTCCTGCTGCTTCCACGTCTACTGCATCTACTGCATCTAGGC  
>HPV45\_Alpha\_397022\_nt7091\_L1\_Tile|1  
TCTACTGCATCTACTGCATCTAGGCCTGCCAAACGTGTACGTATACGTAGTAAGAAATAA  
>HPV47\_Beta\_333062\_nt6269\_L1\_Tile|1  
ATATTTTAAATAAGGTAAAAGATACAGAAAACAGTAATTCCTATATCACAAACTCAAAAGA  
>HPV47\_Beta\_333062\_nt6289\_L1\_Tile|1  
ATACAGAAAACAGTAATTCCTATATCACAAACTCAAAAGATGACAGACAAGACACCTCTT  
>HPV47\_Beta\_333062\_nt6294\_L1\_Tile|1  
GAAAACAGTAATTCCTATATCACAAACTCAAAAGATGACAGACAAGACACCTCTTTTGAT  
>HPV47\_Beta\_333062\_nt6729\_L1\_Tile|1  
AATGGTAATATGAAAAATCAATTTTACATTCCTGGTGCTACGGGTCAGGCTCAGAGCACT  
>HPV47\_Beta\_333062\_nt6934\_L1\_Tile|1  
TAGACAACACAAGAAATACAAATTTACAGCATCTCTGTTTACTCTCAGGCAGGGGACATAA  
>HPV47\_Beta\_333062\_nt6939\_L1\_Tile|1  
AACACAAGAAATACAAATTTACAGCATCTCTGTTTACTCTCAGGCAGGGGACATAAAGGAT  
>HPV47\_Beta\_333062\_nt6944\_L1\_Tile|1  
AAGAAATACAAATTTACAGCATCTCTGTTTACTCTCAGGCAGGGGACATAAAGGATATACA  
>HPV47\_Beta\_333062\_nt6949\_L1\_Tile|1  
ATACAAATTTACAGCATCTCTGTTTACTCTCAGGCAGGGGACATAAAGGATATACAGGATT  
>HPV47\_Beta\_333062\_nt6954\_L1\_Tile|1  
AATTTACAGCATCTCTGTTTACTCTCAGGCAGGGGACATAAAGGATATACAGGATTATAAT  
>HPV47\_Beta\_333062\_nt6964\_L1\_Tile|1  
TCTCTGTTTACTCTCAGGCAGGGGACATAAAGGATATACAGGATTATAATGCAGACAATT  
>HPV47\_Beta\_333062\_nt6969\_L1\_Tile|1  
GTTTACTCTCAGGCAGGGGACATAAAGGATATACAGGATTATAATGCAGACAATTTTAGA  
>HPV47\_Beta\_333062\_nt6974\_L1\_Tile|1  
CTCTCAGGCAGGGGACATAAAGGATATACAGGATTATAATGCAGACAATTTTAGAGAGTA  
>HPV47\_Beta\_333062\_nt6984\_L1\_Tile|1  
GGGGACATAAAGGATATACAGGATTATAATGCAGACAATTTTAGAGAGTATCAAAGACAT  
>HPV47\_Beta\_333062\_nt7164\_L1\_Tile|1  
GTGCCTACTCCAGACAACCCTATTACAGGATACATATAGATATCTAGAATCTTTGGCCACT  
>HPV47\_Beta\_333062\_nt7179\_L1\_Tile|1  
AACCCTATTACAGGATACATATAGATATCTAGAATCTTTGGCCACTAGGTGTCCTGAAAAG  
>HPV47\_Beta\_333062\_nt7184\_L1\_Tile|1  
TATTACAGGATACATATAGATATCTAGAATCTTTGGCCACTAGGTGTCCTGAAAAGTCTCC  
>HPV47\_Beta\_333062\_nt7189\_L1\_Tile|1  
AGGATACATATAGATATCTAGAATCTTTGGCCACTAGGTGTCCTGAAAAGTCTCCTCCAA  
>HPV47\_Beta\_333062\_nt7204\_L1\_Tile|1  
ATCTAGAATCTTTGGCCACTAGGTGTCCTGAAAAGTCTCCTCCAAAAGAGAAGGTTGACC  
>HPV47\_Beta\_333062\_nt7214\_L1\_Tile|1  
TTTGGCCACTAGGTGTCCTGAAAAGTCTCCTCCAAAAGAGAAGGTTGACCCCTACAAAGG  
>HPV47\_Beta\_333062\_nt7224\_L1\_Tile|1  
AGGTGTCCTGAAAAGTCTCCTCCAAAAGAGAAGGTTGACCCCTACAAAGGTTTAACTTT  
>HPV47\_Beta\_333062\_nt7264\_L1\_Tile|1  
CCTACAAAGGTTTAACTTTTGGGATGTCGATATGACAGAGCGCCTTTCCCTGGATTTAG  
>HPV48\_Gamma\_9628542\_nt5248\_L1\_Tile|1  
AGTGCACCAGTAGCTCGTGTGTTGCGCACTGATGAATACGTGCAAGAAACGGATGTATAT  
>HPV48\_Gamma\_9628542\_nt5253\_L1\_Tile|1  
ACCAGTAGCTCGTGTGTTGCGCACTGATGAATACGTGCAAGAAACGGATGTATATTTTTTA

>HPV48\_Gamma\_9628542\_nt5258\_L1\_Tile|1  
TAGCTCGTGTTGCGCACTGATGAATACGTGCAAGAAACGGATGTATATTTTTATACAA  
>HPV48\_Gamma\_9628542\_nt5263\_L1\_Tile|1  
CGTGTTGCGCACTGATGAATACGTGCAAGAAACGGATGTATATTTTTATACAAGCACT  
>HPV48\_Gamma\_9628542\_nt5273\_L1\_Tile|1  
GCACTGATGAATACGTGCAAGAAACGGATGTATATTTTTATACAAGCACTGAAAGACTTT  
>HPV48\_Gamma\_9628542\_nt5278\_L1\_Tile|1  
GATGAATACGTGCAAGAAACGGATGTATATTTTTATACAAGCACTGAAAGACTTTTAATA  
>HPV48\_Gamma\_9628542\_nt5283\_L1\_Tile|1  
ATACGTGCAAGAAACGGATGTATATTTTTATACAAGCACTGAAAGACTTTTAATAGTTGG  
>HPV48\_Gamma\_9628542\_nt5288\_L1\_Tile|1  
TGCAAGAAACGGATGTATATTTTTATACAAGCACTGAAAGACTTTTAATAGTTGGTAATC  
>HPV48\_Gamma\_9628542\_nt5293\_L1\_Tile|1  
GAAACGGATGTATATTTTTATACAAGCACTGAAAGACTTTTAATAGTTGGTAATCCTTAT  
>HPV48\_Gamma\_9628542\_nt5298\_L1\_Tile|1  
GGATGTATATTTTTATACAAGCACTGAAAGACTTTTAATAGTTGGTAATCCTTATTTTGA  
>HPV48\_Gamma\_9628542\_nt5303\_L1\_Tile|1  
TATATTTTTATACAAGCACTGAAAGACTTTTAATAGTTGGTAATCCTTATTTTGATGTTG  
>HPV48\_Gamma\_9628542\_nt5308\_L1\_Tile|1  
TTTTATACAAGCACTGAAAGACTTTTAATAGTTGGTAATCCTTATTTTGATGTTGAAAAC  
>HPV48\_Gamma\_9628542\_nt5313\_L1\_Tile|1  
TACAAGCACTGAAAGACTTTTAATAGTTGGTAATCCTTATTTTGATGTTGAAAACAGAGA  
>HPV48\_Gamma\_9628542\_nt5318\_L1\_Tile|1  
GCACTGAAAGACTTTTAATAGTTGGTAATCCTTATTTTGATGTTGAAAACAGAGACACTA  
>HPV48\_Gamma\_9628542\_nt5323\_L1\_Tile|1  
GAAAGACTTTTAATAGTTGGTAATCCTTATTTTGATGTTGAAAACAGAGACACTATAACA  
>HPV48\_Gamma\_9628542\_nt5328\_L1\_Tile|1  
ACTTTTAATAGTTGGTAATCCTTATTTTGATGTTGAAAACAGAGACACTATAACAGTACC  
>HPV48\_Gamma\_9628542\_nt5333\_L1\_Tile|1  
TAATAGTTGGTAATCCTTATTTTGATGTTGAAAACAGAGACACTATAACAGTACCTAAAG  
>HPV48\_Gamma\_9628542\_nt5338\_L1\_Tile|1  
GTTGGTAATCCTTATTTTGATGTTGAAAACAGAGACACTATAACAGTACCTAAAGTTTCT  
>HPV48\_Gamma\_9628542\_nt5343\_L1\_Tile|1  
TAATCCTTATTTTGATGTTGAAAACAGAGACACTATAACAGTACCTAAAGTTTCTGCTAA  
>HPV48\_Gamma\_9628542\_nt5348\_L1\_Tile|1  
CTTATTTTGATGTTGAAAACAGAGACACTATAACAGTACCTAAAGTTTCTGCTAATCAAT  
>HPV48\_Gamma\_9628542\_nt5353\_L1\_Tile|1  
TTTGATGTTGAAAACAGAGACACTATAACAGTACCTAAAGTTTCTGCTAATCAATACCGA  
>HPV48\_Gamma\_9628542\_nt5373\_L1\_Tile|1  
CACTATAACAGTACCTAAAGTTTCTGCTAATCAATACCGAGTATTTAGATGTAAACTTCC  
>HPV48\_Gamma\_9628542\_nt5408\_L1\_Tile|1  
ACCGAGTATTTAGATGTAAACTTCCAGATCCTAACAAAGTTTGCTCTAGTTGATAAAAATT  
>HPV48\_Gamma\_9628542\_nt5418\_L1\_Tile|1  
TAGATGTAAACTTCCAGATCCTAACAAAGTTTGCTCTAGTTGATAAAAATTTATATAATTC  
>HPV48\_Gamma\_9628542\_nt5453\_L1\_Tile|1  
TAGTTGATAAAAATTTATATAATTCAGATAAGGAACGTTTAGTTTGGAAACTTGTTGGTT  
>HPV48\_Gamma\_9628542\_nt5458\_L1\_Tile|1  
GATAAAAATTTATATAATTCAGATAAGGAACGTTTAGTTTGGAAACTTGTTGGTTTGGAA  
>HPV48\_Gamma\_9628542\_nt5463\_L1\_Tile|1  
AAATTTATATAATTCAGATAAGGAACGTTTAGTTTGGAAACTTGTTGGTTTGGAAAGTAGG  
>HPV48\_Gamma\_9628542\_nt5483\_L1\_Tile|1  
AGGAACGTTTAGTTTGGAAACTTGTTGGTTTGGAAAGTAGGCAGAGGGGGTCCTCTTGGCG  
>HPV48\_Gamma\_9628542\_nt5488\_L1\_Tile|1  
CGTTTAGTTTGGAAACTTGTTGGTTTGGAAAGTAGGCAGAGGGGGTCCTCTTGGCGTAGGA  
>HPV48\_Gamma\_9628542\_nt5493\_L1\_Tile|1

AGTTTGGAAACTTGTGGTTTGGGAAGTAGGCAGAGGGGGTCCTCTTGGCGTAGGATCTAC  
>HPV48\_Gamma\_9628542\_nt5498\_L1\_Tile|1  
GGAAACTTGTGGTTTGGGAAGTAGGCAGAGGGGGTCCTCTTGGCGTAGGATCTACAGGTC  
>HPV48\_Gamma\_9628542\_nt5503\_L1\_Tile|1  
CTTGTGGTTTGGGAAGTAGGCAGAGGGGGTCCTCTTGGCGTAGGATCTACAGGTCATCCT  
>HPV48\_Gamma\_9628542\_nt5508\_L1\_Tile|1  
TGGTTTGGGAAGTAGGCAGAGGGGGTCCTCTTGGCGTAGGATCTACAGGTCATCCTTTACT  
>HPV48\_Gamma\_9628542\_nt5513\_L1\_Tile|1  
TGGAAGTAGGCAGAGGGGGTCCTCTTGGCGTAGGATCTACAGGTCATCCTTTACTAAATA  
>HPV48\_Gamma\_9628542\_nt5518\_L1\_Tile|1  
GTAGGCAGAGGGGGTCCTCTTGGCGTAGGATCTACAGGTCATCCTTTACTAAATAAGATA  
>HPV48\_Gamma\_9628542\_nt5523\_L1\_Tile|1  
CAGAGGGGGTCCTCTTGGCGTAGGATCTACAGGTCATCCTTTACTAAATAAGATAGGGGA  
>HPV48\_Gamma\_9628542\_nt5588\_L1\_Tile|1  
AAAATCCTAGCTTTTATTTAGGAGAACAAACAAAGGATGAGAGACAAAATGTTTCCATGG  
>HPV48\_Gamma\_9628542\_nt5603\_L1\_Tile|1  
ATTTAGGAGAACAAACAAAGGATGAGAGACAAAATGTTTCCATGGATCCTAAGCAGAGTC  
>HPV48\_Gamma\_9628542\_nt5613\_L1\_Tile|1  
ACAAACAAAGGATGAGAGACAAAATGTTTCCATGGATCCTAAGCAGAGTCAGATACTAAT  
>HPV48\_Gamma\_9628542\_nt5638\_L1\_Tile|1  
GTTTCCATGGATCCTAAGCAGAGTCAGATACTAATAGTTGGTTGTGCTCCAGCCACTGGA  
>HPV48\_Gamma\_9628542\_nt5643\_L1\_Tile|1  
CATGGATCCTAAGCAGAGTCAGATACTAATAGTTGGTTGTGCTCCAGCCACTGGAGAATA  
>HPV48\_Gamma\_9628542\_nt5648\_L1\_Tile|1  
ATCCTAAGCAGAGTCAGATACTAATAGTTGGTTGTGCTCCAGCCACTGGAGAATACTGGG  
>HPV48\_Gamma\_9628542\_nt5653\_L1\_Tile|1  
AAGCAGAGTCAGATACTAATAGTTGGTTGTGCTCCAGCCACTGGAGAATACTGGGATTTA  
>HPV48\_Gamma\_9628542\_nt5658\_L1\_Tile|1  
GAGTCAGATACTAATAGTTGGTTGTGCTCCAGCCACTGGAGAATACTGGGATTTAGCTAA  
>HPV48\_Gamma\_9628542\_nt5663\_L1\_Tile|1  
AGATACTAATAGTTGGTTGTGCTCCAGCCACTGGAGAATACTGGGATTTAGCTAAACCAT  
>HPV48\_Gamma\_9628542\_nt5673\_L1\_Tile|1  
AGTTGGTTGTGCTCCAGCCACTGGAGAATACTGGGATTTAGCTAAACCATGCAATGATTT  
>HPV48\_Gamma\_9628542\_nt5698\_L1\_Tile|1  
GAATACTGGGATTTAGCTAAACCATGCAATGATTTGGAAAACGGGGCTGCACCACCAATT  
>HPV48\_Gamma\_9628542\_nt5703\_L1\_Tile|1  
CTGGGATTTAGCTAAACCATGCAATGATTTGGAAAACGGGGCTGCACCACCAATTCAACT  
>HPV48\_Gamma\_9628542\_nt5708\_L1\_Tile|1  
ATTTAGCTAAACCATGCAATGATTTGGAAAACGGGGCTGCACCACCAATTCAACTAGTTA  
>HPV48\_Gamma\_9628542\_nt5713\_L1\_Tile|1  
GCTAAACCATGCAATGATTTGGAAAACGGGGCTGCACCACCAATTCAACTAGTTAATACT  
>HPV48\_Gamma\_9628542\_nt5723\_L1\_Tile|1  
GCAATGATTTGGAAAACGGGGCTGCACCACCAATTCAACTAGTTAATACTGTTATTCAGG  
>HPV48\_Gamma\_9628542\_nt5728\_L1\_Tile|1  
GATTTGGAAAACGGGGCTGCACCACCAATTCAACTAGTTAATACTGTTATTCAGGATGGT  
>HPV48\_Gamma\_9628542\_nt5733\_L1\_Tile|1  
GGAAAACGGGGCTGCACCACCAATTCAACTAGTTAATACTGTTATTCAGGATGGTGATAT  
>HPV48\_Gamma\_9628542\_nt5798\_L1\_Tile|1  
ATATAGGCTTTGGGGCTGCTAATTTTCCTAAGTTGATGCAGGATCGTGCTGGCGTCCCTC  
>HPV48\_Gamma\_9628542\_nt5803\_L1\_Tile|1  
GGCTTTGGGGCTGCTAATTTTCCTAAGTTGATGCAGGATCGTGCTGGCGTCCCTCTAGAG  
>HPV48\_Gamma\_9628542\_nt5808\_L1\_Tile|1  
TGGGGCTGCTAATTTTCCTAAGTTGATGCAGGATCGTGCTGGCGTCCCTCTAGAGTTAAT  
>HPV48\_Gamma\_9628542\_nt5813\_L1\_Tile|1  
CTGCTAATTTTCCTAAGTTGATGCAGGATCGTGCTGGCGTCCCTCTAGAGTTAATAGATT

>HPV48\_Gamma\_9628542\_nt5818\_L1\_Tile|1  
AATTTTCCTAAGTTGATGCAGGATCGTGCTGGCGTCCCTCTAGAGTTAATAGATTCTATT  
>HPV48\_Gamma\_9628542\_nt5823\_L1\_Tile|1  
TCCTAAGTTGATGCAGGATCGTGCTGGCGTCCCTCTAGAGTTAATAGATTCTATTAGTAT  
>HPV48\_Gamma\_9628542\_nt5833\_L1\_Tile|1  
ATGCAGGATCGTGCTGGCGTCCCTCTAGAGTTAATAGATTCTATTAGTATATGGCCAGAT  
>HPV48\_Gamma\_9628542\_nt5838\_L1\_Tile|1  
GGATCGTGCTGGCGTCCCTCTAGAGTTAATAGATTCTATTAGTATATGGCCAGATTTTTT  
>HPV48\_Gamma\_9628542\_nt5843\_L1\_Tile|1  
GTGCTGGCGTCCCTCTAGAGTTAATAGATTCTATTAGTATATGGCCAGATTTTTTAAAGA  
>HPV48\_Gamma\_9628542\_nt5853\_L1\_Tile|1  
CCCTCTAGAGTTAATAGATTCTATTAGTATATGGCCAGATTTTTTAAAGATGACCAAAGA  
>HPV48\_Gamma\_9628542\_nt5858\_L1\_Tile|1  
TAGAGTTAATAGATTCTATTAGTATATGGCCAGATTTTTTAAAGATGACCAAAGATATTT  
>HPV48\_Gamma\_9628542\_nt5868\_L1\_Tile|1  
AGATTCTATTAGTATATGGCCAGATTTTTTAAAGATGACCAAAGATATTTATGGAGACTC  
>HPV48\_Gamma\_9628542\_nt5888\_L1\_Tile|1  
CAGATTTTTTAAAGATGACCAAAGATATTTATGGAGACTCTGTCTTCTTTTTTGGTAAAC  
>HPV48\_Gamma\_9628542\_nt5893\_L1\_Tile|1  
TTTTTAAAGATGACCAAAGATATTTATGGAGACTCTGTCTTCTTTTTTGGTAAACGGGAA  
>HPV48\_Gamma\_9628542\_nt5898\_L1\_Tile|1  
AAAGATGACCAAAGATATTTATGGAGACTCTGTCTTCTTTTTTGGTAAACGGGAACAATG  
>HPV48\_Gamma\_9628542\_nt5903\_L1\_Tile|1  
TGACCAAAGATATTTATGGAGACTCTGTCTTCTTTTTTGGTAAACGGGAACAATGTTATG  
>HPV48\_Gamma\_9628542\_nt5918\_L1\_Tile|1  
ATGGAGACTCTGTCTTCTTTTTTGGTAAACGGGAACAATGTTATGCTCGTCATCTTTTTTG  
>HPV48\_Gamma\_9628542\_nt5928\_L1\_Tile|1  
TGTCTTCTTTTTTGGTAAACGGGAACAATGTTATGCTCGTCATCTTTTTTGCAAGAGCTGG  
>HPV48\_Gamma\_9628542\_nt5933\_L1\_Tile|1  
TCTTTTTTGGTAAACGGGAACAATGTTATGCTCGTCATCTTTTTTGCAAGAGCTGGCCAAA  
>HPV48\_Gamma\_9628542\_nt5938\_L1\_Tile|1  
TTTGGTAAACGGGAACAATGTTATGCTCGTCATCTTTTTTGCAAGAGCTGGCCAAATGGGG  
>HPV48\_Gamma\_9628542\_nt5948\_L1\_Tile|1  
GGGAACAATGTTATGCTCGTCATCTTTTTTGCAAGAGCTGGCCAAATGGGGGAGCCTATAC  
>HPV48\_Gamma\_9628542\_nt5953\_L1\_Tile|1  
CAATGTTATGCTCGTCATCTTTTTTGCAAGAGCTGGCCAAATGGGGGAGCCTATACCAACA  
>HPV48\_Gamma\_9628542\_nt5958\_L1\_Tile|1  
TTATGCTCGTCATCTTTTTTGCAAGAGCTGGCCAAATGGGGGAGCCTATACCAACAGAAAA  
>HPV48\_Gamma\_9628542\_nt5963\_L1\_Tile|1  
CTCGTCATCTTTTTTGCAAGAGCTGGCCAAATGGGGGAGCCTATACCAACAGAAAATGGAG  
>HPV48\_Gamma\_9628542\_nt5968\_L1\_Tile|1  
CATCTTTTTTGCAAGAGCTGGCCAAATGGGGGAGCCTATACCAACAGAAAATGGAGTATAT  
>HPV48\_Gamma\_9628542\_nt5973\_L1\_Tile|1  
TTTTTGCAAGAGCTGGCCAAATGGGGGAGCCTATACCAACAGAAAATGGAGTATATTATAT  
>HPV48\_Gamma\_9628542\_nt5988\_L1\_Tile|1  
CCAAATGGGGGAGCCTATACCAACAGAAAATGGAGTATATTATATAACTCCTGATTCTGCG  
>HPV48\_Gamma\_9628542\_nt5993\_L1\_Tile|1  
TGGGGGAGCCTATACCAACAGAAAATGGAGTATATTATATAACTCCTGATTCTGCCGATC  
>HPV48\_Gamma\_9628542\_nt5998\_L1\_Tile|1  
GAGCCTATACCAACAGAAAATGGAGTATATTATATAACTCCTGATTCTGCCGATCAAAAC  
>HPV48\_Gamma\_9628542\_nt6008\_L1\_Tile|1  
CAACAGAAAATGGAGTATATTATATAACTCCTGATTCTGCCGATCAAAACAACAGATCTT  
>HPV48\_Gamma\_9628542\_nt6013\_L1\_Tile|1  
GAAAATGGAGTATATTATATAACTCCTGATTCTGCCGATCAAAACAACAGATCTTCTCAT  
>HPV48\_Gamma\_9628542\_nt6018\_L1\_Tile|1

TGGAGTATATTATATAACTCCTGATTCTGCCGATCAAAACAACAGATCTTCTCATTTAGG  
>HPV48\_Gamma\_9628542\_nt6023\_L1\_Tile|1  
TATATTATATAACTCCTGATTCTGCCGATCAAAACAACAGATCTTCTCATTTAGGATCTT  
>HPV48\_Gamma\_9628542\_nt6028\_L1\_Tile|1  
TATATAACTCCTGATTCTGCCGATCAAAACAACAGATCTTCTCATTTAGGATCTTCTGTG  
>HPV48\_Gamma\_9628542\_nt6033\_L1\_Tile|1  
AACTCCTGATTCTGCCGATCAAAACAACAGATCTTCTCATTTAGGATCTTCTGTGTATTT  
>HPV48\_Gamma\_9628542\_nt6038\_L1\_Tile|1  
CTGATTCTGCCGATCAAAACAACAGATCTTCTCATTTAGGATCTTCTGTGTATTTTACAA  
>HPV48\_Gamma\_9628542\_nt6043\_L1\_Tile|1  
TCTGCCGATCAAAACAACAGATCTTCTCATTTAGGATCTTCTGTGTATTTTACAACACCA  
>HPV48\_Gamma\_9628542\_nt6058\_L1\_Tile|1  
AACAGATCTTCTCATTTAGGATCTTCTGTGTATTTTACAACACCAAGTGGATCCTTGAAT  
>HPV48\_Gamma\_9628542\_nt6063\_L1\_Tile|1  
ATCTTCTCATTTAGGATCTTCTGTGTATTTTACAACACCAAGTGGATCCTTGAATACTAG  
>HPV48\_Gamma\_9628542\_nt6068\_L1\_Tile|1  
CTCATTTAGGATCTTCTGTGTATTTTACAACACCAAGTGGATCCTTGAATACTAGCGATT  
>HPV48\_Gamma\_9628542\_nt6178\_L1\_Tile|1  
AATGGCATTGTGGGGAAATGAGCTGTTTATTACAGTTTTTTGATAATACTCATAATGTG  
>HPV48\_Gamma\_9628542\_nt6183\_L1\_Tile|1  
CATTTGTTGGGGAAATGAGCTGTTTATTACAGTTTTTTGATAATACTCATAATGTGAATTT  
>HPV48\_Gamma\_9628542\_nt6188\_L1\_Tile|1  
GTTGGGGAAATGAGCTGTTTATTACAGTTTTTTGATAATACTCATAATGTGAATTTTACTA  
>HPV48\_Gamma\_9628542\_nt6193\_L1\_Tile|1  
GGAAATGAGCTGTTTATTACAGTTTTTTGATAATACTCATAATGTGAATTTTACTATTAGT  
>HPV48\_Gamma\_9628542\_nt6198\_L1\_Tile|1  
TGAGCTGTTTATTACAGTTTTTTGATAATACTCATAATGTGAATTTTACTATTAGTGTTAA  
>HPV48\_Gamma\_9628542\_nt6203\_L1\_Tile|1  
TGTTTATTACAGTTTTTTGATAATACTCATAATGTGAATTTTACTATTAGTGTTAAGAATG  
>HPV48\_Gamma\_9628542\_nt6208\_L1\_Tile|1  
ATTACAGTTTTTTGATAATACTCATAATGTGAATTTTACTATTAGTGTTAAGAATGATAAA  
>HPV48\_Gamma\_9628542\_nt6213\_L1\_Tile|1  
AGTTTTTTGATAATACTCATAATGTGAATTTTACTATTAGTGTTAAGAATGATAAACTGC  
>HPV48\_Gamma\_9628542\_nt6218\_L1\_Tile|1  
TTGATAATACTCATAATGTGAATTTTACTATTAGTGTTAAGAATGATAAACTGCATTAA  
>HPV48\_Gamma\_9628542\_nt6223\_L1\_Tile|1  
AATACTCATAATGTGAATTTTACTATTAGTGTTAAGAATGATAAACTGCATTAACTGAA  
>HPV48\_Gamma\_9628542\_nt6228\_L1\_Tile|1  
TCATAATGTGAATTTTACTATTAGTGTTAAGAATGATAAACTGCATTAACTGAAAACCTA  
>HPV48\_Gamma\_9628542\_nt6233\_L1\_Tile|1  
ATGTGAATTTTACTATTAGTGTTAAGAATGATAAACTGCATTAACTGAAAACCTACATAG  
>HPV48\_Gamma\_9628542\_nt6238\_L1\_Tile|1  
AATTTTACTATTAGTGTTAAGAATGATAAACTGCATTAACTGAAAACCTACATAGATAAT  
>HPV48\_Gamma\_9628542\_nt6243\_L1\_Tile|1  
TACTATTAGTGTTAAGAATGATAAACTGCATTAACTGAAAACCTACATAGATAATGGTTA  
>HPV48\_Gamma\_9628542\_nt6248\_L1\_Tile|1  
TTAGTGTTAAGAATGATAAACTGCATTAACTGAAAACCTACATAGATAATGGTTACAAAT  
>HPV48\_Gamma\_9628542\_nt6253\_L1\_Tile|1  
GTTAAGAATGATAAACTGCATTAACTGAAAACCTACATAGATAATGGTTACAAATATAAT  
>HPV48\_Gamma\_9628542\_nt6258\_L1\_Tile|1  
GAATGATAAACTGCATTAACTGAAAACCTACATAGATAATGGTTACAAATATAATAATGC  
>HPV48\_Gamma\_9628542\_nt6263\_L1\_Tile|1  
ATAAACTGCATTAACTGAAAACCTACATAGATAATGGTTACAAATATAATAATGCAGATT  
>HPV48\_Gamma\_9628542\_nt6268\_L1\_Tile|1  
ACTGCATTAACTGAAAACCTACATAGATAATGGTTACAAATATAATAATGCAGATTTTAAA



>HPV48\_Gamma\_9628542\_nt6273\_L1\_Tile|1  
ATTAAGTAAAACTACATAGATAATGGTTACAAATATAATAATGCAGATTTTAAACAATA  
>HPV48\_Gamma\_9628542\_nt6278\_L1\_Tile|1  
CTGAAACTACATAGATAATGGTTACAAATATAATAATGCAGATTTTAAACAATATCTTC  
>HPV48\_Gamma\_9628542\_nt6283\_L1\_Tile|1  
AACTACATAGATAATGGTTACAAATATAATAATGCAGATTTTAAACAATATCTTCGACAT  
>HPV48\_Gamma\_9628542\_nt6288\_L1\_Tile|1  
CATAGATAATGGTTACAAATATAATAATGCAGATTTTAAACAATATCTTCGACATACAGA  
>HPV48\_Gamma\_9628542\_nt6293\_L1\_Tile|1  
ATAATGGTTACAAATATAATAATGCAGATTTTAAACAATATCTTCGACATACAGAAGAAT  
>HPV48\_Gamma\_9628542\_nt6298\_L1\_Tile|1  
GGTTACAAATATAATAATGCAGATTTTAAACAATATCTTCGACATACAGAAGAATATGAA  
>HPV48\_Gamma\_9628542\_nt6303\_L1\_Tile|1  
CAAATATAATAATGCAGATTTTAAACAATATCTTCGACATACAGAAGAATATGAAATAGA  
>HPV48\_Gamma\_9628542\_nt6308\_L1\_Tile|1  
ATAATAATGCAGATTTTAAACAATATCTTCGACATACAGAAGAATATGAAATAGAGTTGG  
>HPV48\_Gamma\_9628542\_nt6313\_L1\_Tile|1  
AATGCAGATTTTAAACAATATCTTCGACATACAGAAGAATATGAAATAGAGTTGGTTTTT  
>HPV48\_Gamma\_9628542\_nt6318\_L1\_Tile|1  
AGATTTTAAACAATATCTTCGACATACAGAAGAATATGAAATAGAGTTGGTTTTTCAGTT  
>HPV48\_Gamma\_9628542\_nt6323\_L1\_Tile|1  
TTAAACAATATCTTCGACATACAGAAGAATATGAAATAGAGTTGGTTTTTCAGTTATGCA  
>HPV48\_Gamma\_9628542\_nt6348\_L1\_Tile|1  
AGAATATGAAATAGAGTTGGTTTTTCAGTTATGCAAAGTGAAGTTGACTGCAGATGTTCT  
>HPV48\_Gamma\_9628542\_nt6353\_L1\_Tile|1  
ATGAAATAGAGTTGGTTTTTCAGTTATGCAAAGTGAAGTTGACTGCAGATGTTCTGGCAC  
>HPV48\_Gamma\_9628542\_nt6363\_L1\_Tile|1  
GTTGGTTTTTCAGTTATGCAAAGTGAAGTTGACTGCAGATGTTCTGGCACATTTACACGT  
>HPV48\_Gamma\_9628542\_nt6368\_L1\_Tile|1  
TTTTTCAGTTATGCAAAGTGAAGTTGACTGCAGATGTTCTGGCACATTTACACGTTATGA  
>HPV48\_Gamma\_9628542\_nt6373\_L1\_Tile|1  
CAGTTATGCAAAGTGAAGTTGACTGCAGATGTTCTGGCACATTTACACGTTATGAATCCC  
>HPV48\_Gamma\_9628542\_nt6378\_L1\_Tile|1  
ATGCAAAGTGAAGTTGACTGCAGATGTTCTGGCACATTTACACGTTATGAATCCCAGAAT  
>HPV48\_Gamma\_9628542\_nt6383\_L1\_Tile|1  
AAGTGAAGTTGACTGCAGATGTTCTGGCACATTTACACGTTATGAATCCCAGAATATTAG  
>HPV48\_Gamma\_9628542\_nt6388\_L1\_Tile|1  
AACTTGACTGCAGATGTTCTGGCACATTTACACGTTATGAATCCCAGAATATTAGAGGAG  
>HPV48\_Gamma\_9628542\_nt6398\_L1\_Tile|1  
CAGATGTTCTGGCACATTTACACGTTATGAATCCCAGAATATTAGAGGAGTGGCAATTAG  
>HPV48\_Gamma\_9628542\_nt6458\_L1\_Tile|1  
CTTTTGTTCACAGCTCCAACGGGCATTGAAGATACTTACAGGTATATCAAATCCATGG  
>HPV48\_Gamma\_9628542\_nt6463\_L1\_Tile|1  
GTTCCACAGCTCCAACGGGCATTGAAGATACTTACAGGTATATCAAATCCATGGCTACT  
>HPV48\_Gamma\_9628542\_nt6468\_L1\_Tile|1  
ACCAGCTCCAACGGGCATTGAAGATACTTACAGGTATATCAAATCCATGGCTACTAAATG  
>HPV48\_Gamma\_9628542\_nt6473\_L1\_Tile|1  
CTCCAACGGGCATTGAAGATACTTACAGGTATATCAAATCCATGGCTACTAAATGCCCTA  
>HPV48\_Gamma\_9628542\_nt6478\_L1\_Tile|1  
ACGGGCATTGAAGATACTTACAGGTATATCAAATCCATGGCTACTAAATGCCCTACTGCT  
>HPV48\_Gamma\_9628542\_nt6483\_L1\_Tile|1  
CATTGAAGATACTTACAGGTATATCAAATCCATGGCTACTAAATGCCCTACTGCTGAACC  
>HPV48\_Gamma\_9628542\_nt6488\_L1\_Tile|1  
AAGATACTTACAGGTATATCAAATCCATGGCTACTAAATGCCCTACTGCTGAACCAGAAG  
>HPV48\_Gamma\_9628542\_nt6493\_L1\_Tile|1

ACTTACAGGTATATCAAATCCATGGCTACTAAATGCCCTACTGCTGAACCAGAAGAAGAC  
>HPV48\_Gamma\_9628542\_nt6503\_L1\_Tile|1  
ATATCAAATCCATGGCTACTAAATGCCCTACTGCTGAACCAGAAGAAGACACAGATCCAT  
>HPV48\_Gamma\_9628542\_nt6518\_L1\_Tile|1  
CTACTAAATGCCCTACTGCTGAACCAGAAGAAGACACAGATCCATACAAAGCTTACAGTT  
>HPV48\_Gamma\_9628542\_nt6528\_L1\_Tile|1  
CCCTACTGCTGAACCAGAAGAAGACACAGATCCATACAAAGCTTACAGTTTCTGGACTTT  
>HPV48\_Gamma\_9628542\_nt6533\_L1\_Tile|1  
CTGCTGAACCAGAAGAAGACACAGATCCATACAAAGCTTACAGTTTCTGGACTTTAGATA  
>HPV48\_Gamma\_9628542\_nt6538\_L1\_Tile|1  
GAACCAGAAGAAGACACAGATCCATACAAAGCTTACAGTTTCTGGACTTTAGATATGACA  
>HPV48\_Gamma\_9628542\_nt6543\_L1\_Tile|1  
AGAAGAAGACACAGATCCATACAAAGCTTACAGTTTCTGGACTTTAGATATGACAGAGCG  
>HPV48\_Gamma\_9628542\_nt6548\_L1\_Tile|1  
AAGACACAGATCCATACAAAGCTTACAGTTTCTGGACTTTAGATATGACAGAGCGCTTCT  
>HPV48\_Gamma\_9628542\_nt6553\_L1\_Tile|1  
ACAGATCCATACAAAGCTTACAGTTTCTGGACTTTAGATATGACAGAGCGCTTCTCGTCT  
>HPV48\_Gamma\_9628542\_nt6558\_L1\_Tile|1  
TCCATACAAAGCTTACAGTTTCTGGACTTTAGATATGACAGAGCGCTTCTCGTCTGATTT  
>HPV48\_Gamma\_9628542\_nt6563\_L1\_Tile|1  
ACAAAGCTTACAGTTTCTGGACTTTAGATATGACAGAGCGCTTCTCGTCTGATTTAAGTC  
>HPV48\_Gamma\_9628542\_nt6568\_L1\_Tile|1  
GCTTACAGTTTCTGGACTTTAGATATGACAGAGCGCTTCTCGTCTGATTTAAGTCAGTTT  
>HPV48\_Gamma\_9628542\_nt6573\_L1\_Tile|1  
CAGTTTCTGGACTTTAGATATGACAGAGCGCTTCTCGTCTGATTTAAGTCAGTTTTCCTT  
>HPV48\_Gamma\_9628542\_nt6578\_L1\_Tile|1  
TCTGGACTTTAGATATGACAGAGCGCTTCTCGTCTGATTTAAGTCAGTTTTCCTTGGGTC  
>HPV48\_Gamma\_9628542\_nt6583\_L1\_Tile|1  
ACTTTAGATATGACAGAGCGCTTCTCGTCTGATTTAAGTCAGTTTTCCTTGGGTCGAAAA  
>HPV48\_Gamma\_9628542\_nt6588\_L1\_Tile|1  
AGATATGACAGAGCGCTTCTCGTCTGATTTAAGTCAGTTTTCCTTGGGTCGAAAATTTTT  
>HPV48\_Gamma\_9628542\_nt6593\_L1\_Tile|1  
TGACAGAGCGCTTCTCGTCTGATTTAAGTCAGTTTTCCTTGGGTCGAAAATTTTTATATC  
>HPV48\_Gamma\_9628542\_nt6598\_L1\_Tile|1  
GAGCGCTTCTCGTCTGATTTAAGTCAGTTTTCCTTGGGTCGAAAATTTTTATATCAAAC  
>HPV48\_Gamma\_9628542\_nt6603\_L1\_Tile|1  
CTTCTCGTCTGATTTAAGTCAGTTTTCCTTGGGTCGAAAATTTTTATATCAAACGGTTT  
>HPV48\_Gamma\_9628542\_nt6613\_L1\_Tile|1  
GATTTAAGTCAGTTTTCCTTGGGTCGAAAATTTTTATATCAAACGGTTTGTTAAATGGT  
>HPV48\_Gamma\_9628542\_nt6623\_L1\_Tile|1  
AGTTTTCTTGGGTCGAAAATTTTTATATCAAACGGTTTGTTAAATGGTAAACGAGCTA  
>HPV48\_Gamma\_9628542\_nt6628\_L1\_Tile|1  
TCCTTGGGTCGAAAATTTTTATATCAAACGGTTTGTTAAATGGTAAACGAGCTAGAACA  
>HPV48\_Gamma\_9628542\_nt6633\_L1\_Tile|1  
GGGTCGAAAATTTTTATATCAAACGGTTTGTTAAATGGTAAACGAGCTAGAACAGACTA  
>HPV48\_Gamma\_9628542\_nt6638\_L1\_Tile|1  
GAAAATTTTTATATCAAACGGTTTGTTAAATGGTAAACGAGCTAGAACAGACTATACAG  
>HPV48\_Gamma\_9628542\_nt6648\_L1\_Tile|1  
ATATCAAACGGTTTGTTAAATGGTAAACGAGCTAGAACAGACTATACAGCTGCAGGATC  
>HPV48\_Gamma\_9628542\_nt6653\_L1\_Tile|1  
AAACTGGTTTGTTAAATGGTAAACGAGCTAGAACAGACTATACAGCTGCAGGATCTAGTA  
>HPV48\_Gamma\_9628542\_nt6658\_L1\_Tile|1  
GGTTTGTTAAATGGTAAACGAGCTAGAACAGACTATACAGCTGCAGGATCTAGTACCAGA  
>HPV48\_Gamma\_9628542\_nt6663\_L1\_Tile|1  
GTTAAATGGTAAACGAGCTAGAACAGACTATACAGCTGCAGGATCTAGTACCAGATCTAC

>HPV48\_Gamma\_9628542\_nt6668\_L1\_Tile|1  
ATGGTAAACGAGCTAGAACAGACTATACAGCTGCAGGATCTAGTACCAGATCTACAAAGC  
>HPV48\_Gamma\_9628542\_nt6673\_L1\_Tile|1  
AAACGAGCTAGAACAGACTATACAGCTGCAGGATCTAGTACCAGATCTACAAAGCGTAGG  
>HPV48\_Gamma\_9628542\_nt6678\_L1\_Tile|1  
AGCTAGAACAGACTATACAGCTGCAGGATCTAGTACCAGATCTACAAAGCGTAGGAGAGT  
>HPV48\_Gamma\_9628542\_nt6683\_L1\_Tile|1  
GAACAGACTATACAGCTGCAGGATCTAGTACCAGATCTACAAAGCGTAGGAGAGTAAGAT  
>HPV48\_Gamma\_9628542\_nt6685\_L1\_Tile|1  
ACAGACTATACAGCTGCAGGATCTAGTACCAGATCTACAAAGCGTAGGAGAGTAAGATAG  
>HPV49\_Beta\_9627363\_nt5952\_L1\_Tile|1  
AGGACATCCATATTTTGATGTGAGAGATACAGCAGACAATTCTAAAATTTTAGTACCAAA  
>HPV49\_Beta\_9627363\_nt5957\_L1\_Tile|1  
ATCCATATTTTGATGTGAGAGATACAGCAGACAATTCTAAAATTTTAGTACCAAGGTTT  
>HPV49\_Beta\_9627363\_nt6167\_L1\_Tile|1  
GTACAACAGGACATCCATTGTTTAAACAAAGTCAAAGATACTGAAAATGCTAATAACTATA  
>HPV49\_Beta\_9627363\_nt6177\_L1\_Tile|1  
ACATCCATTGTTTAAACAAAGTCAAAGATACTGAAAATGCTAATAACTATATAGTAACTTC  
>HPV49\_Beta\_9627363\_nt6182\_L1\_Tile|2  
CATTGTTTAAACAAAGTCAAAGATACTGAAAATGCTAATAACTATATAGTAACTTCTAAAG  
>HPV49\_Beta\_9627363\_nt6292\_L1\_Tile|1  
ATAGGTTGTACTCCTTGTATGGGTGAGTACTGGGACGCTGCTAAACCTTGTGATGCAGAT  
>HPV49\_Beta\_9627363\_nt6297\_L1\_Tile|1  
TTGTACTCCTTGTATGGGTGAGTACTGGGACGCTGCTAAACCTTGTGATGCAGATGCTGG  
>HPV49\_Beta\_9627363\_nt6332\_L1\_Tile|1  
CTAAACCTTGTGATGCAGATGCTGGTCAGGGTAAATGCCCTCCATTAGAATTAATCAATT  
>HPV49\_Beta\_9627363\_nt6337\_L1\_Tile|1  
CCTTGTGATGCAGATGCTGGTCAGGGTAAATGCCCTCCATTAGAATTAATCAATTCAGTT  
>HPV49\_Beta\_9627363\_nt6392\_L1\_Tile|1  
CAGTTATACAAGATGGTGATATGATTGATATAGGTTTTGGTAATATCAATAATAAGACAT  
>HPV49\_Beta\_9627363\_nt6587\_L1\_Tile|1  
GGCACTTCTTTGTTAGAGGTGGTAATGTAGGGGATGCGATACCCAATACTGCTGTAGGTC  
>HPV49\_Beta\_9627363\_nt6592\_L1\_Tile|1  
TTCTTTGTTAGAGGTGGTAATGTAGGGGATGCGATACCCAATACTGCTGTAGGTCAGGAT  
>HPV49\_Beta\_9627363\_nt6602\_L1\_Tile|2  
GAGGTGGTAATGTAGGGGATGCGATACCCAATACTGCTGTAGGTCAGGATAACAATTACA  
>HPV49\_Beta\_9627363\_nt6607\_L1\_Tile|1  
GGTAATGTAGGGGATGCGATACCCAATACTGCTGTAGGTCAGGATAACAATTACATATTA  
>HPV49\_Beta\_9627363\_nt6612\_L1\_Tile|1  
TGTAGGGGATGCGATACCCAATACTGCTGTAGGTCAGGATAACAATTACATATTACCTGC  
>HPV49\_Beta\_9627363\_nt6617\_L1\_Tile|1  
GGGATGCGATACCCAATACTGCTGTAGGTCAGGATAACAATTACATATTACCTGCAGCAA  
>HPV49\_Beta\_9627363\_nt6622\_L1\_Tile|2  
GCGATACCCAATACTGCTGTAGGTCAGGATAACAATTACATATTACCTGCAGCAAGTCAA  
>HPV49\_Beta\_9627363\_nt6627\_L1\_Tile|1  
ACCCAATACTGCTGTAGGTCAGGATAACAATTACATATTACCTGCAGCAAGTCAACAGGC  
>HPV49\_Beta\_9627363\_nt6632\_L1\_Tile|1  
ATACTGCTGTAGGTCAGGATAACAATTACATATTACCTGCAGCAAGTCAACAGGCCCAAA  
>HPV49\_Beta\_9627363\_nt6647\_L1\_Tile|1  
AGGATAACAATTACATATTACCTGCAGCAAGTCAACAGGCCCAAAATACTCTTGGCAGCT  
>HPV49\_Beta\_9627363\_nt6652\_L1\_Tile|1  
AACAAATTACATATTACCTGCAGCAAGTCAACAGGCCCAAAATACTCTTGGCAGCTCCATC  
>HPV49\_Beta\_9627363\_nt6657\_L1\_Tile|1  
TTACATATTACCTGCAGCAAGTCAACAGGCCCAAAATACTCTTGGCAGCTCCATCTATTT  
>HPV49\_Beta\_9627363\_nt6677\_L1\_Tile|1

GTCAACAGGCCCAAATACTCTTGGCAGCTCCATCTATTTCCCTACCGTCAGTGGCTCTT  
>HPV49\_Beta\_9627363\_nt6822\_L1\_Tile|2  
TCAGCTTTTTATAACAGTGGCTGATAATACCAGAAATACCAATTTTACTATTAGTGTAAG  
>HPV49\_Beta\_9627363\_nt6827\_L1\_Tile|1  
TTTTTATAACAGTGGCTGATAATACCAGAAATACCAATTTTACTATTAGTGTAAGTACGG  
>HPV49\_Beta\_9627363\_nt6832\_L1\_Tile|1  
ATAACAGTGGCTGATAATACCAGAAATACCAATTTTACTATTAGTGTAAGTACGGATGGC  
>HPV49\_Beta\_9627363\_nt6847\_L1\_Tile|1  
AATACCAGAAATACCAATTTTACTATTAGTGTAAGTACGGATGGCCAGACACCTACAGAA  
>HPV49\_Beta\_9627363\_nt6852\_L1\_Tile|1  
CAGAAATACCAATTTTACTATTAGTGTAAGTACGGATGGCCAGACACCTACAGAATATGA  
>HPV49\_Beta\_9627363\_nt6857\_L1\_Tile|1  
ATACCAATTTTACTATTAGTGTAAGTACGGATGGCCAGACACCTACAGAATATGACAGTA  
>HPV49\_Beta\_9627363\_nt6862\_L1\_Tile|2  
AATTTTACTATTAGTGTAAGTACGGATGGCCAGACACCTACAGAATATGACAGTACCAAG  
>HPV49\_Beta\_9627363\_nt6867\_L1\_Tile|1  
TACTATTAGTGTAAGTACGGATGGCCAGACACCTACAGAATATGACAGTACCAAGGTTAG  
>HPV49\_Beta\_9627363\_nt7052\_L1\_Tile|1  
AATTGGGATTTGTTCCCTACCCCTGATAATCCTATACATGACACATATAGGTATCTTACAT  
>HPV49\_Beta\_9627363\_nt7057\_L1\_Tile|1  
GGATTTGTTCCCTACCCCTGATAATCCTATACATGACACATATAGGTATCTTACATCACAG  
>HPV49\_Beta\_9627363\_nt7067\_L1\_Tile|1  
CTACCCCTGATAATCCTATACATGACACATATAGGTATCTTACATCACAGGCAACACGAT  
>HPV49\_Beta\_9627363\_nt7072\_L1\_Tile|1  
CCTGATAATCCTATACATGACACATATAGGTATCTTACATCACAGGCAACACGATGCCCT  
>HPV49\_Beta\_9627363\_nt7077\_L1\_Tile|1  
TAATCCTATACATGACACATATAGGTATCTTACATCACAGGCAACACGATGCCCTGACAA  
>HPV49\_Beta\_9627363\_nt7082\_L1\_Tile|2  
CTATACATGACACATATAGGTATCTTACATCACAGGCAACACGATGCCCTGACAAACAAC  
>HPV49\_Beta\_9627363\_nt7087\_L1\_Tile|1  
CATGACACATATAGGTATCTTACATCACAGGCAACACGATGCCCTGACAAACAACCTGCT  
>HPV49\_Beta\_9627363\_nt7097\_L1\_Tile|1  
ATAGGTATCTTACATCACAGGCAACACGATGCCCTGACAAACAACCTGCTCCAGAAAGGA  
>HPV49\_Beta\_9627363\_nt7112\_L1\_Tile|1  
CACAGGCAACACGATGCCCTGACAAACAACCTGCTCCAGAAAGGAAAGATCCATATGAGC  
>HPV49\_Beta\_9627363\_nt7117\_L1\_Tile|1  
GCAACACGATGCCCTGACAAACAACCTGCTCCAGAAAGGAAAGATCCATATGAGCAGTAT  
>HPV49\_Beta\_9627363\_nt7122\_L1\_Tile|2  
ACGATGCCCTGACAAACAACCTGCTCCAGAAAGGAAAGATCCATATGAGCAGTATAACTT  
>HPV49\_Beta\_9627363\_nt7232\_L1\_Tile|1  
CTTTAGGAAGAAAGTTTTTTATTTCAAGCTGGGCTACAACGGGCTTCTAGAGTGTCTAAAT  
>HPV49\_Beta\_9627363\_nt7242\_L1\_Tile|2  
AAAGTTTTTATTTCAAGCTGGGCTACAACGGGCTTCTAGAGTGTCTAAATCCTCTGCTGC  
>HPV49\_Beta\_9627363\_nt7247\_L1\_Tile|1  
TTTTATTTCAAGCTGGGCTACAACGGGCTTCTAGAGTGTCTAAATCCTCTGCTGCTAGAG  
>HPV49\_Beta\_9627363\_nt7252\_L1\_Tile|1  
TTTCAAGCTGGGCTACAACGGGCTTCTAGAGTGTCTAAATCCTCTGCTGCTAGAGCTTCC  
>HPV49\_Beta\_9627363\_nt7257\_L1\_Tile|1  
AGCTGGGCTACAACGGGCTTCTAGAGTGTCTAAATCCTCTGCTGCTAGAGCTTCCACACG  
>HPV49\_Beta\_9627363\_nt7262\_L1\_Tile|2  
GGCTACAACGGGCTTCTAGAGTGTCTAAATCCTCTGCTGCTAGAGCTTCCACACGGGGTA  
>HPV49\_Beta\_9627363\_nt7267\_L1\_Tile|1  
CAACGGGCTTCTAGAGTGTCTAAATCCTCTGCTGCTAGAGCTTCCACACGGGGTATTAAA  
>HPV49\_Beta\_9627363\_nt7282\_L1\_Tile|2  
GTGTCTAAATCCTCTGCTGCTAGAGCTTCCACACGGGGTATTAAACGAAAACGGAGATGA

>HPV50\_Gamma\_9628550\_nt5232\_L1\_Tile|1  
ATGGCTCATTGGTCCTCAACCTCTGGAAAGTTATACCTTCCACCAAGTACTCCTGTTGCC  
>HPV50\_Gamma\_9628550\_nt5237\_L1\_Tile|1  
TCATTGGTCCTCAACCTCTGGAAAGTTATACCTTCCACCAAGTACTCCTGTTGCCAGAGT  
>HPV50\_Gamma\_9628550\_nt5242\_L1\_Tile|2  
GGTCCTCAACCTCTGGAAAGTTATACCTTCCACCAAGTACTCCTGTTGCCAGAGTTTTAA  
>HPV50\_Gamma\_9628550\_nt5247\_L1\_Tile|1  
TCAACCTCTGGAAAGTTATACCTTCCACCAAGTACTCCTGTTGCCAGAGTTTTAAGCACC  
>HPV50\_Gamma\_9628550\_nt5272\_L1\_Tile|1  
CACCAAGTACTCCTGTTGCCAGAGTTTTAAGCACCGATGAATATGTGAAAGAACTGATG  
>HPV50\_Gamma\_9628550\_nt5277\_L1\_Tile|1  
AGTACTCCTGTTGCCAGAGTTTTAAGCACCGATGAATATGTGAAAGAACTGATGTTTAC  
>HPV50\_Gamma\_9628550\_nt5322\_L1\_Tile|2  
GAAACTGATGTTTACTTTTCATGCACGCAGTGAGCGTTTACTAATTGTGGGACACCCATAT  
>HPV50\_Gamma\_9628550\_nt5347\_L1\_Tile|1  
GCAGTGAGCGTTTACTAATTGTGGGACACCCATATTATGATATAGAAGATGGTGGAGATA  
>HPV50\_Gamma\_9628550\_nt5352\_L1\_Tile|1  
GAGCGTTTACTAATTGTGGGACACCCATATTATGATATAGAAGATGGTGGAGATATCAAA  
>HPV50\_Gamma\_9628550\_nt5357\_L1\_Tile|1  
TTTACTAATTGTGGGACACCCATATTATGATATAGAAGATGGTGGAGATATCAAAGTTCC  
>HPV50\_Gamma\_9628550\_nt5362\_L1\_Tile|2  
TAATTGTGGGACACCCATATTATGATATAGAAGATGGTGGAGATATCAAAGTTCCTAAAG  
>HPV50\_Gamma\_9628550\_nt5372\_L1\_Tile|1  
ACACCCATATTATGATATAGAAGATGGTGGAGATATCAAAGTTCCTAAAGTATCAGCAAA  
>HPV50\_Gamma\_9628550\_nt5377\_L1\_Tile|1  
CATATTATGATATAGAAGATGGTGGAGATATCAAAGTTCCTAAAGTATCAGCAAATCAAT  
>HPV50\_Gamma\_9628550\_nt5397\_L1\_Tile|1  
GGTGGAGATATCAAAGTTCCTAAAGTATCAGCAAATCAATACAGAGTTTTTCGTTGTGAA  
>HPV50\_Gamma\_9628550\_nt5482\_L1\_Tile|2  
TAATTGATACTACATTGTATAACTCAGATACAGAACGTTTGGTTTGGAAACTAGTAGGTA  
>HPV50\_Gamma\_9628550\_nt5487\_L1\_Tile|1  
GATACTACATTGTATAACTCAGATACAGAACGTTTGGTTTGGAAACTAGTAGGTATAGAA  
>HPV50\_Gamma\_9628550\_nt5492\_L1\_Tile|1  
TACATTGTATAACTCAGATACAGAACGTTTGGTTTGGAAACTAGTAGGTATAGAAGTCGG  
>HPV50\_Gamma\_9628550\_nt5497\_L1\_Tile|1  
TGTATAACTCAGATACAGAACGTTTGGTTTGGAAACTAGTAGGTATAGAAGTCGGGAGAG  
>HPV50\_Gamma\_9628550\_nt5507\_L1\_Tile|1  
AGATACAGAACGTTTGGTTTGGAAACTAGTAGGTATAGAAGTCGGGAGAGGTGGGCCTTT  
>HPV50\_Gamma\_9628550\_nt5522\_L1\_Tile|2  
GGTTTGGAAACTAGTAGGTATAGAAGTCGGGAGAGGTGGGCCTTTAGGTGTTGGATCTAC  
>HPV50\_Gamma\_9628550\_nt5527\_L1\_Tile|1  
GGAAACTAGTAGGTATAGAAGTCGGGAGAGGTGGGCCTTTAGGTGTTGGATCTACTGGTC  
>HPV50\_Gamma\_9628550\_nt5617\_L1\_Tile|1  
AAAATCCTAGCTTTTACTTAGGTCCACAAGAAAAAGATGAAAGACAAAACCTTGTCTATAG  
>HPV50\_Gamma\_9628550\_nt5622\_L1\_Tile|2  
CCTAGCTTTTACTTAGGTCCACAAGAAAAAGATGAAAGACAAAACCTTGTCTATAGATCCT  
>HPV50\_Gamma\_9628550\_nt5632\_L1\_Tile|1  
ACTTAGGTCCACAAGAAAAAGATGAAAGACAAAACCTTGTCTATAGATCCTAAACAAACAC  
>HPV50\_Gamma\_9628550\_nt5642\_L1\_Tile|2  
ACAAGAAAAAGATGAAAGACAAAACCTTGTCTATAGATCCTAAACAAACACAGTTATTGAT  
>HPV50\_Gamma\_9628550\_nt5647\_L1\_Tile|1  
AAAAAGATGAAAGACAAAACCTTGTCTATAGATCCTAAACAAACACAGTTATTGATTGTAG  
>HPV50\_Gamma\_9628550\_nt5652\_L1\_Tile|1  
GATGAAAGACAAAACCTTGTCTATAGATCCTAAACAAACACAGTTATTGATTGTAGGCTGC  
>HPV50\_Gamma\_9628550\_nt5667\_L1\_Tile|1

TTGTCTATAGATCCTAAACAAACACAGTTATTGATTGTAGGCTGCAAACCAGCTGTTGGT  
>HPV50\_Gamma\_9628550\_nt5687\_L1\_Tile|1  
AACACAGTTATTGATTGTAGGCTGCAAACCAGCTGTTGGTGAATATTGGGATTTAGCAGA  
>HPV50\_Gamma\_9628550\_nt5692\_L1\_Tile|1  
AGTTATTGATTGTAGGCTGCAAACCAGCTGTTGGTGAATATTGGGATTTAGCAGAACCTT  
>HPV50\_Gamma\_9628550\_nt5702\_L1\_Tile|2  
TGTAGGCTGCAAACCAGCTGTTGGTGAATATTGGGATTTAGCAGAACCTTGTGACAAAAA  
>HPV50\_Gamma\_9628550\_nt5717\_L1\_Tile|1  
AGCTGTTGGTGAATATTGGGATTTAGCAGAACCTTGTGACAAAAACAGCTTAAATAATGG  
>HPV50\_Gamma\_9628550\_nt5742\_L1\_Tile|2  
GCAGAACCTTGTGACAAAAACAGCTTAAATAATGGCAAGTGTCTCCAATACAACACTAGTA  
>HPV50\_Gamma\_9628550\_nt5747\_L1\_Tile|1  
ACCTTGTGACAAAAACAGCTTAAATAATGGCAAGTGTCTCCAATACAACACTAGTAAACAG  
>HPV50\_Gamma\_9628550\_nt5752\_L1\_Tile|1  
GTGACAAAAACAGCTTAAATAATGGCAAGTGTCTCCAATACAACACTAGTAAACAGTTATA  
>HPV50\_Gamma\_9628550\_nt5757\_L1\_Tile|1  
AAAAACAGCTTAAATAATGGCAAGTGTCTCCAATACAACACTAGTAAACAGTTATATTCAG  
>HPV50\_Gamma\_9628550\_nt5827\_L1\_Tile|1  
TGGGAGATATAGGATTTGGTAATGCAAACCTTTCCTAAACTACAACAGGACAGAGCAGGGG  
>HPV50\_Gamma\_9628550\_nt5832\_L1\_Tile|1  
GATATAGGATTTGGTAATGCAAACCTTTCCTAAACTACAACAGGACAGAGCAGGGGTCCCT  
>HPV50\_Gamma\_9628550\_nt5837\_L1\_Tile|1  
AGGATTTGGTAATGCAAACCTTTCCTAAACTACAACAGGACAGAGCAGGGGTCCCTTTAGA  
>HPV50\_Gamma\_9628550\_nt5847\_L1\_Tile|1  
AATGCAAACCTTTCCTAAACTACAACAGGACAGAGCAGGGGTCCCTTTAGATATAGTGGAT  
>HPV50\_Gamma\_9628550\_nt5852\_L1\_Tile|1  
AAACTTTCCTAAACTACAACAGGACAGAGCAGGGGTCCCTTTAGATATAGTGGATTCAAT  
>HPV50\_Gamma\_9628550\_nt5862\_L1\_Tile|2  
AAACTACAACAGGACAGAGCAGGGGTCCCTTTAGATATAGTGGATTCAATCAGCTTATGG  
>HPV50\_Gamma\_9628550\_nt5872\_L1\_Tile|1  
AGGACAGAGCAGGGGTCCCTTTAGATATAGTGGATTCAATCAGCTTATGGCCTGATCTAT  
>HPV50\_Gamma\_9628550\_nt5882\_L1\_Tile|2  
AGGGGTCCCTTTAGATATAGTGGATTCAATCAGCTTATGGCCTGATCTATTAAAAATGAC  
>HPV50\_Gamma\_9628550\_nt5887\_L1\_Tile|1  
TCCCTTTAGATATAGTGGATTCAATCAGCTTATGGCCTGATCTATTAAAAATGACTAAAG  
>HPV50\_Gamma\_9628550\_nt5892\_L1\_Tile|1  
TTAGATATAGTGGATTCAATCAGCTTATGGCCTGATCTATTAAAAATGACTAAAGATGTC  
>HPV50\_Gamma\_9628550\_nt5897\_L1\_Tile|1  
TATAGTGGATTCAATCAGCTTATGGCCTGATCTATTAAAAATGACTAAAGATGTCTATGG  
>HPV50\_Gamma\_9628550\_nt5902\_L1\_Tile|2  
TGGATTCAATCAGCTTATGGCCTGATCTATTAAAAATGACTAAAGATGTCTATGGGGACC  
>HPV50\_Gamma\_9628550\_nt5917\_L1\_Tile|1  
TATGGCCTGATCTATTAAAAATGACTAAAGATGTCTATGGGGACCATGTGTTTTTCTATG  
>HPV50\_Gamma\_9628550\_nt5927\_L1\_Tile|1  
TCTATTAAAAATGACTAAAGATGTCTATGGGGACCATGTGTTTTTCTATGCAAAGCAAGA  
>HPV50\_Gamma\_9628550\_nt5937\_L1\_Tile|1  
ATGACTAAAGATGTCTATGGGGACCATGTGTTTTTCTATGCAAAGCAAGAGCAATTATAT  
>HPV50\_Gamma\_9628550\_nt5977\_L1\_Tile|1  
CAAAGCAAGAGCAATTATATGCCAGACATTTGTTTACCCATGCAGGACCAATTGGGGAAC  
>HPV50\_Gamma\_9628550\_nt5982\_L1\_Tile|2  
CAAGAGCAATTATATGCCAGACATTTGTTTACCCATGCAGGACCAATTGGGGAACCTATA  
>HPV50\_Gamma\_9628550\_nt5987\_L1\_Tile|1  
GCAATTATATGCCAGACATTTGTTTACCCATGCAGGACCAATTGGGGAACCTATACCTAA  
>HPV50\_Gamma\_9628550\_nt5992\_L1\_Tile|1  
TATATGCCAGACATTTGTTTACCCATGCAGGACCAATTGGGGAACCTATACCTAATGTCT

>HPV50\_Gamma\_9628550\_nt5997\_L1\_Tile|1  
GCCAGACATTTGTTTACCCATGCAGGACCAATTGGGGAACCTATACCTAATGTCTCAGGA  
>HPV50\_Gamma\_9628550\_nt6002\_L1\_Tile|2  
ACATTTGTTTACCCATGCAGGACCAATTGGGGAACCTATACCTAATGTCTCAGGAGTTTA  
>HPV50\_Gamma\_9628550\_nt6007\_L1\_Tile|1  
TGTTTACCCATGCAGGACCAATTGGGGAACCTATACCTAATGTCTCAGGAGTTTATAATT  
>HPV50\_Gamma\_9628550\_nt6022\_L1\_Tile|2  
GACCAATTGGGGAACCTATACCTAATGTCTCAGGAGTTTATAATTATGCAGTAAACCCTA  
>HPV50\_Gamma\_9628550\_nt6027\_L1\_Tile|1  
ATTGGGGAACCTATACCTAATGTCTCAGGAGTTTATAATTATGCAGTAAACCCTAATCAA  
>HPV50\_Gamma\_9628550\_nt6032\_L1\_Tile|1  
GGAACCTATACCTAATGTCTCAGGAGTTTATAATTATGCAGTAAACCCTAATCAACCAGA  
>HPV50\_Gamma\_9628550\_nt6037\_L1\_Tile|1  
CTATACCTAATGTCTCAGGAGTTTATAATTATGCAGTAAACCCTAATCAACCAGAGCAAA  
>HPV50\_Gamma\_9628550\_nt6042\_L1\_Tile|2  
CCTAATGTCTCAGGAGTTTATAATTATGCAGTAAACCCTAATCAACCAGAGCAAAATCGT  
>HPV50\_Gamma\_9628550\_nt6047\_L1\_Tile|1  
TGTCTCAGGAGTTTATAATTATGCAGTAAACCCTAATCAACCAGAGCAAAATCGTAGAAC  
>HPV50\_Gamma\_9628550\_nt6057\_L1\_Tile|1  
GTTTATAATTATGCAGTAAACCCTAATCAACCAGAGCAAAATCGTAGAACCAATATTGGT  
>HPV50\_Gamma\_9628550\_nt6062\_L1\_Tile|2  
TAATTATGCAGTAAACCCTAATCAACCAGAGCAAAATCGTAGAACCAATATTGGTTCCTA  
>HPV50\_Gamma\_9628550\_nt6067\_L1\_Tile|1  
ATGCAGTAAACCCTAATCAACCAGAGCAAAATCGTAGAACCAATATTGGTTCCTACTTAT  
>HPV50\_Gamma\_9628550\_nt6072\_L1\_Tile|1  
GTAAACCCTAATCAACCAGAGCAAAATCGTAGAACCAATATTGGTTCCTACTTATATTTT  
>HPV50\_Gamma\_9628550\_nt6077\_L1\_Tile|1  
CCCTAATCAACCAGAGCAAAATCGTAGAACCAATATTGGTTCCTACTTATATTTTACTAC  
>HPV50\_Gamma\_9628550\_nt6082\_L1\_Tile|2  
ATCAACCAGAGCAAAATCGTAGAACCAATATTGGTTCCTACTTATATTTTACTACACCAA  
>HPV50\_Gamma\_9628550\_nt6092\_L1\_Tile|1  
GCAAAATCGTAGAACCAATATTGGTTCCTACTTATATTTTACTACACCAAGTGGATCTTT  
>HPV50\_Gamma\_9628550\_nt6097\_L1\_Tile|1  
ATCGTAGAACCAATATTGGTTCCTACTTATATTTTACTACACCAAGTGGATCTTTAAATA  
>HPV50\_Gamma\_9628550\_nt6102\_L1\_Tile|2  
AGAACCAATATTGGTTCCTACTTATATTTTACTACACCAAGTGGATCTTTAAATACAAGC  
>HPV50\_Gamma\_9628550\_nt6107\_L1\_Tile|1  
CAATATTGGTTCCTACTTATATTTTACTACACCAAGTGGATCTTTAAATACAAGCAGTTC  
>HPV50\_Gamma\_9628550\_nt6112\_L1\_Tile|1  
TTGGTTCCTACTTATATTTTACTACACCAAGTGGATCTTTAAATACAAGCAGTTCACAGT  
>HPV50\_Gamma\_9628550\_nt6117\_L1\_Tile|1  
TCCTACTTATATTTTACTACACCAAGTGGATCTTTAAATACAAGCAGTTCACAGTTATTT  
>HPV50\_Gamma\_9628550\_nt6137\_L1\_Tile|1  
ACCAAGTGGATCTTTAAATACAAGCAGTTCACAGTTATTTAATAGACCATATTGGATTCTG  
>HPV50\_Gamma\_9628550\_nt6207\_L1\_Tile|1  
GGTACGAACAATTGTATTTGTTGGGGTAATGAGGTATTTGTTACAGTATTTGATAACACC  
>HPV50\_Gamma\_9628550\_nt6217\_L1\_Tile|1  
ATTGTATTTGTTGGGGTAATGAGGTATTTGTTACAGTATTTGATAACACCAGAAACATTA  
>HPV50\_Gamma\_9628550\_nt6222\_L1\_Tile|2  
ATTTGTTGGGGTAATGAGGTATTTGTTACAGTATTTGATAACACCAGAAACATTAACTTT  
>HPV50\_Gamma\_9628550\_nt6227\_L1\_Tile|1  
TTGGGGTAATGAGGTATTTGTTACAGTATTTGATAACACCAGAAACATTAACTTTAATAT  
>HPV50\_Gamma\_9628550\_nt6232\_L1\_Tile|1  
GTAATGAGGTATTTGTTACAGTATTTGATAACACCAGAAACATTAACTTTAATATTAGTG  
>HPV50\_Gamma\_9628550\_nt6237\_L1\_Tile|1

GAGGTATTTGTTACAGTATTTGATAACACCAGAAACATTAACCTTTAATATTAGTGTTAAG  
>HPV50\_Gamma\_9628550\_nt6242\_L1\_Tile|2  
ATTTGTTACAGTATTTGATAACACCAGAAACATTAACCTTTAATATTAGTGTTAAGAAAGA  
>HPV50\_Gamma\_9628550\_nt6247\_L1\_Tile|1  
TTACAGTATTTGATAACACCAGAAACATTAACCTTTAATATTAGTGTTAAGAAAGATGTCA  
>HPV50\_Gamma\_9628550\_nt6252\_L1\_Tile|1  
GTATTTGATAACACCAGAAACATTAACCTTTAATATTAGTGTTAAGAAAGATGTCAATCCT  
>HPV50\_Gamma\_9628550\_nt6257\_L1\_Tile|1  
TGATAACACCAGAAACATTAACCTTTAATATTAGTGTTAAGAAAGATGTCAATCCTTTGGA  
>HPV50\_Gamma\_9628550\_nt6262\_L1\_Tile|2  
ACACCAGAAACATTAACCTTTAATATTAGTGTTAAGAAAGATGTCAATCCTTTGGATCCTT  
>HPV50\_Gamma\_9628550\_nt6267\_L1\_Tile|1  
AGAAACATTAACCTTTAATATTAGTGTTAAGAAAGATGTCAATCCTTTGGATCCTTTAAAT  
>HPV50\_Gamma\_9628550\_nt6272\_L1\_Tile|1  
CATTAACTTTAATATTAGTGTTAAGAAAGATGTCAATCCTTTGGATCCTTTAAATGTAGC  
>HPV50\_Gamma\_9628550\_nt6277\_L1\_Tile|1  
ACTTTAATATTAGTGTTAAGAAAGATGTCAATCCTTTGGATCCTTTAAATGTAGCAAGTT  
>HPV50\_Gamma\_9628550\_nt6287\_L1\_Tile|1  
TAGTGTTAAGAAAGATGTCAATCCTTTGGATCCTTTAAATGTAGCAAGTCTTATATGTA  
>HPV50\_Gamma\_9628550\_nt6292\_L1\_Tile|1  
TTAAGAAAGATGTCAATCCTTTGGATCCTTTAAATGTAGCAAGTCTTATATGTACTCAA  
>HPV50\_Gamma\_9628550\_nt6297\_L1\_Tile|1  
AAAGATGTCAATCCTTTGGATCCTTTAAATGTAGCAAGTCTTATATGTACTCAAAGGAT  
>HPV50\_Gamma\_9628550\_nt6302\_L1\_Tile|2  
TGTCAATCCTTTGGATCCTTTAAATGTAGCAAGTCTTATATGTACTCAAAGGATGATTT  
>HPV50\_Gamma\_9628550\_nt6307\_L1\_Tile|1  
ATCCTTTGGATCCTTTAAATGTAGCAAGTCTTATATGTACTCAAAGGATGATTTTAAATC  
>HPV50\_Gamma\_9628550\_nt6322\_L1\_Tile|2  
TAAATGTAGCAAGTCTTATATGTACTCAAAGGATGATTTTAAATCAGTACAGCCGTCATA  
>HPV50\_Gamma\_9628550\_nt6327\_L1\_Tile|1  
GTAGCAAGTCTTATATGTACTCAAAGGATGATTTTAAATCAGTACAGCCGTCATACTGAA  
>HPV50\_Gamma\_9628550\_nt6332\_L1\_Tile|1  
AAGTTCTTATATGTACTCAAAGGATGATTTTAAATCAGTACAGCCGTCATACTGAAGAATA  
>HPV50\_Gamma\_9628550\_nt6337\_L1\_Tile|1  
CTTATATGTACTCAAAGGATGATTTTAAATCAGTACAGCCGTCATACTGAAGAATATGAAT  
>HPV50\_Gamma\_9628550\_nt6342\_L1\_Tile|2  
ATGTACTCAAAGGATGATTTTAAATCAGTACAGCCGTCATACTGAAGAATATGAATTAGAA  
>HPV50\_Gamma\_9628550\_nt6347\_L1\_Tile|1  
CTCAAAGGATGATTTTAAATCAGTACAGCCGTCATACTGAAGAATATGAATTAGAATTTAT  
>HPV50\_Gamma\_9628550\_nt6387\_L1\_Tile|1  
GAATATGAATTAGAATTTATATTTTCAGTTATGTAAAGTAGGATTGGATGCTGATATATTA  
>HPV50\_Gamma\_9628550\_nt6392\_L1\_Tile|1  
TGAATTAGAATTTATATTTTCAGTTATGTAAAGTAGGATTGGATGCTGATATATTAGCTCA  
>HPV50\_Gamma\_9628550\_nt6397\_L1\_Tile|1  
TAGAATTTATATTTTCAGTTATGTAAAGTAGGATTGGATGCTGATATATTAGCTCATCTTA  
>HPV50\_Gamma\_9628550\_nt6402\_L1\_Tile|2  
TTTATATTTTCAGTTATGTAAAGTAGGATTGGATGCTGATATATTAGCTCATCTTAATGTA  
>HPV50\_Gamma\_9628550\_nt6407\_L1\_Tile|1  
ATTTTCAGTTATGTAAAGTAGGATTGGATGCTGATATATTAGCTCATCTTAATGTAATGGA  
>HPV50\_Gamma\_9628550\_nt6417\_L1\_Tile|1  
TGTAAGTAGGATTGGATGCTGATATATTAGCTCATCTTAATGTAATGGACCCCAGAATT  
>HPV50\_Gamma\_9628550\_nt6422\_L1\_Tile|2  
AGTAGGATTGGATGCTGATATATTAGCTCATCTTAATGTAATGGACCCCAGAATTTTGGA  
>HPV50\_Gamma\_9628550\_nt6427\_L1\_Tile|1  
GATTGGATGCTGATATATTAGCTCATCTTAATGTAATGGACCCCAGAATTTTGGAATTT



>HPV50\_Gamma\_9628550\_nt6432\_L1\_Tile|1  
GATGCTGATATATTAGCTCATCTTAATGTAATGGACCCCAGAATTTTGGAAAATTGGCAA  
>HPV50\_Gamma\_9628550\_nt6437\_L1\_Tile|1  
TGATATATTAGCTCATCTTAATGTAATGGACCCCAGAATTTTGGAAAATTGGCAATTAGC  
>HPV50\_Gamma\_9628550\_nt6442\_L1\_Tile|2  
TATTAGCTCATCTTAATGTAATGGACCCCAGAATTTTGGAAAATTGGCAATTAGCTTATG  
>HPV50\_Gamma\_9628550\_nt6447\_L1\_Tile|1  
GCTCATCTTAATGTAATGGACCCCAGAATTTTGGAAAATTGGCAATTAGCTTATGTTCCA  
>HPV50\_Gamma\_9628550\_nt6472\_L1\_Tile|1  
GAATTTTGGAAAATTGGCAATTAGCTTATGTTCCACCAGCTCCCAGTGGTATAGGCGATA  
>HPV50\_Gamma\_9628550\_nt6522\_L1\_Tile|2  
ATAGGCGATACTTACAGATACTTAAAATCTGATGCTACAAAATGTCCTGCAAAAGACAGT  
>HPV50\_Gamma\_9628550\_nt6527\_L1\_Tile|1  
CGATACTTACAGATACTTAAAATCTGATGCTACAAAATGTCCTGCAAAAGACAGTAGCGC  
>HPV50\_Gamma\_9628550\_nt6532\_L1\_Tile|1  
CTTACAGATACTTAAAATCTGATGCTACAAAATGTCCTGCAAAAGACAGTAGCGCCGAAG  
>HPV50\_Gamma\_9628550\_nt6537\_L1\_Tile|1  
AGATACTTAAAATCTGATGCTACAAAATGTCCTGCAAAAGACAGTAGCGCCGAAGTAGTA  
>HPV50\_Gamma\_9628550\_nt6542\_L1\_Tile|2  
CTTAAAATCTGATGCTACAAAATGTCCTGCAAAAGACAGTAGCGCCGAAGTAGTAGACCC  
>HPV50\_Gamma\_9628550\_nt6547\_L1\_Tile|1  
AATCTGATGCTACAAAATGTCCTGCAAAAGACAGTAGCGCCGAAGTAGTAGACCCTTATA  
>HPV50\_Gamma\_9628550\_nt6552\_L1\_Tile|1  
GATGCTACAAAATGTCCTGCAAAAGACAGTAGCGCCGAAGTAGTAGACCCTTATAAAGAA  
>HPV50\_Gamma\_9628550\_nt6572\_L1\_Tile|1  
AAAAGACAGTAGCGCCGAAGTAGTAGACCCTTATAAAGAATATACTTTTTGGAATGTCAA  
>HPV50\_Gamma\_9628550\_nt6587\_L1\_Tile|1  
CGAAGTAGTAGACCCTTATAAAGAATATACTTTTTGGAATGTCAACCTTACAGAAAAGTT  
>HPV50\_Gamma\_9628550\_nt6592\_L1\_Tile|1  
TAGTAGACCCTTATAAAGAATATACTTTTTGGAATGTCAACCTTACAGAAAAGTTTTCGT  
>HPV50\_Gamma\_9628550\_nt6597\_L1\_Tile|1  
GACCCTTATAAAGAATATACTTTTTGGAATGTCAACCTTACAGAAAAGTTTTCGTCTGAA  
>HPV50\_Gamma\_9628550\_nt6602\_L1\_Tile|2  
TTATAAAGAATATACTTTTTGGAATGTCAACCTTACAGAAAAGTTTTCGTCTGAACTTGA  
>HPV50\_Gamma\_9628550\_nt6607\_L1\_Tile|1  
AAGAATATACTTTTTGGAATGTCAACCTTACAGAAAAGTTTTCGTCTGAACTTGATCAGT  
>HPV50\_Gamma\_9628550\_nt6612\_L1\_Tile|1  
TATACTTTTTGGAATGTCAACCTTACAGAAAAGTTTTCGTCTGAACTTGATCAGTATGCC  
>HPV50\_Gamma\_9628550\_nt6617\_L1\_Tile|1  
TTTTTTGGAATGTCAACCTTACAGAAAAGTTTTCGTCTGAACTTGATCAGTATGCCCTAGG  
>HPV50\_Gamma\_9628550\_nt6627\_L1\_Tile|1  
GTCAACCTTACAGAAAAGTTTTCGTCTGAACTTGATCAGTATGCCCTAGGACGAAAATTT  
>HPV50\_Gamma\_9628550\_nt6642\_L1\_Tile|2  
AAGTTTTCTGCTGAACTTGATCAGTATGCCCTAGGACGAAAATTTTTGTTTCAGACTGGA  
>HPV50\_Gamma\_9628550\_nt6647\_L1\_Tile|1  
TTCGTCTGAACTTGATCAGTATGCCCTAGGACGAAAATTTTTGTTTCAGACTGGATTATT  
>HPV50\_Gamma\_9628550\_nt6652\_L1\_Tile|1  
CTGAACTTGATCAGTATGCCCTAGGACGAAAATTTTTGTTTCAGACTGGATTATTAAAGA  
>HPV50\_Gamma\_9628550\_nt6657\_L1\_Tile|1  
CTTGATCAGTATGCCCTAGGACGAAAATTTTTGTTTCAGACTGGATTATTAAAGAGAAGA  
>HPV50\_Gamma\_9628550\_nt6662\_L1\_Tile|2  
TCAGTATGCCCTAGGACGAAAATTTTTGTTTCAGACTGGATTATTAAAGAGAAGAGTTAG  
>HPV50\_Gamma\_9628550\_nt6667\_L1\_Tile|1  
ATGCCCTAGGACGAAAATTTTTGTTTCAGACTGGATTATTAAAGAGAAGAGTTAGAACTG  
>HPV50\_Gamma\_9628550\_nt6672\_L1\_Tile|1

CTAGGACGAAAATTTTTGTTTCAGACTGGATTATTAAAGAGAAGAGTTAGAACTGATTAC  
>HPV50\_Gamma\_9628550\_nt6677\_L1\_Tile|1  
ACGAAAATTTTTGTTTCAGACTGGATTATTAAAGAGAAGAGTTAGAACTGATTACACTGT  
>HPV50\_Gamma\_9628550\_nt6682\_L1\_Tile|2  
AATTTTTGTTTCAGACTGGATTATTAAAGAGAAGAGTTAGAACTGATTACACTGTTGCTA  
>HPV50\_Gamma\_9628550\_nt6687\_L1\_Tile|1  
TTGTTTCAGACTGGATTATTAAAGAGAAGAGTTAGAACTGATTACACTGTTGCTACAGTT  
>HPV50\_Gamma\_9628550\_nt6692\_L1\_Tile|1  
TCAGACTGGATTATTAAAGAGAAGAGTTAGAACTGATTACACTGTTGCTACAGTTTCCAA  
>HPV50\_Gamma\_9628550\_nt6697\_L1\_Tile|1  
CTGGATTATTAAAGAGAAGAGTTAGAACTGATTACACTGTTGCTACAGTTTCCAAACCAA  
>HPV50\_Gamma\_9628550\_nt6702\_L1\_Tile|2  
TTATTAAAGAGAAGAGTTAGAACTGATTACACTGTTGCTACAGTTTCCAAACCAAACAAG  
>HPV50\_Gamma\_9628550\_nt6707\_L1\_Tile|1  
AAAGAGAAGAGTTAGAACTGATTACACTGTTGCTACAGTTTCCAAACCAAACAAGAGAAA  
>HPV50\_Gamma\_9628550\_nt6712\_L1\_Tile|1  
GAAGAGTTAGAACTGATTACACTGTTGCTACAGTTTCCAAACCAAACAAGAGAAAACGTA  
>HPV50\_Gamma\_9628550\_nt6720\_L1\_Tile|1  
AGAAGTTGATTACACTGTTGCTACAGTTTCCAAACCAAACAAGAGAAAACGTACCAGATAA  
>HPV51\_Alpha\_333087\_nt5667\_L1\_Tile|1  
ATTTTCCAATACCTAAACCTCAACGCGTGCTGCTATTTCCTAAAGTATCTGCATTTCAAT  
>HPV51\_Alpha\_333087\_nt5892\_L1\_Tile|1  
AATATGATGACACAGAAAATTCACGCATAGCAAATGGCAATGCACAACAAGATGTTAGAG  
>HPV51\_Alpha\_333087\_nt5897\_L1\_Tile|1  
GATGACACAGAAAATTCACGCATAGCAAATGGCAATGCACAACAAGATGTTAGAGATAAC  
>HPV51\_Alpha\_333087\_nt5902\_L1\_Tile|2  
CACAGAAAATTCACGCATAGCAAATGGCAATGCACAACAAGATGTTAGAGATAACACATC  
>HPV51\_Alpha\_333087\_nt5907\_L1\_Tile|1  
AAAATTCACGCATAGCAAATGGCAATGCACAACAAGATGTTAGAGATAACACATCTGTTG  
>HPV51\_Alpha\_333087\_nt5912\_L1\_Tile|1  
TCACGCATAGCAAATGGCAATGCACAACAAGATGTTAGAGATAACACATCTGTTGACAAC  
>HPV51\_Alpha\_333087\_nt6027\_L1\_Tile|1  
GTATTGGCACTACATGCAAAAACACACCTGTACCTCCAGGAGACTGCCCCCCCCCTGGAAC  
>HPV51\_Alpha\_333087\_nt6032\_L1\_Tile|1  
GGCACTACATGCAAAAACACACCTGTACCTCCAGGAGACTGCCCCCCCCCTGGAACCTGTA  
>HPV51\_Alpha\_333087\_nt6272\_L1\_Tile|1  
AGGGAGCAAAATCTTTGCTAGGCACTATTATAATAAACTTGTAGGTGTTGGGGAAGACATT  
>HPV51\_Alpha\_333087\_nt6282\_L1\_Tile|2  
TCTTTGCTAGGCACTATTATAATAAACTTGTAGGTGTTGGGGAAGACATTCCTAACGATT  
>HPV51\_Alpha\_333087\_nt6287\_L1\_Tile|1  
GCTAGGCACTATTATAATAAACTTGTAGGTGTTGGGGAAGACATTCCTAACGATTATTAT  
>HPV51\_Alpha\_333087\_nt6292\_L1\_Tile|1  
GCACTATTATAATAAACTTGTAGGTGTTGGGGAAGACATTCCTAACGATTATTATATTAA  
>HPV51\_Alpha\_333087\_nt6297\_L1\_Tile|1  
ATTATAATAAACTTGTAGGTGTTGGGGAAGACATTCCTAACGATTATTATATTAAAGGGTA  
>HPV51\_Alpha\_333087\_nt6302\_L1\_Tile|2  
AATAAACTTGTAGGTGTTGGGGAAGACATTCCTAACGATTATTATATTAAAGGGTAGTGGT  
>HPV51\_Alpha\_333087\_nt6307\_L1\_Tile|1  
ACTTGTAGGTGTTGGGGAAGACATTCCTAACGATTATTATATTAAAGGGTAGTGGTAATGG  
>HPV51\_Alpha\_333087\_nt6312\_L1\_Tile|1  
TAGGTGTTGGGGAAGACATTCCTAACGATTATTATATTAAAGGGTAGTGGTAATGGCCGTG  
>HPV51\_Alpha\_333087\_nt6517\_L1\_Tile|1  
CTGTGTTGATACTACCAGAAGTACAAATTTAACTATTAGCACTGCCACTGCTGCGGTTTC  
>HPV51\_Alpha\_333087\_nt6522\_L1\_Tile|2  
TTGATACTACCAGAAGTACAAATTTAACTATTAGCACTGCCACTGCTGCGGTTTCCCCAA

>HPV51\_Alpha\_333087\_nt6527\_L1\_Tile|1  
ACTACCAGAAGTACAAATTTAACTATTAGCACTGCCACTGCTGCGGTTTCCCCAACATTT  
>HPV51\_Alpha\_333087\_nt6532\_L1\_Tile|1  
CAGAAGTACAAATTTAACTATTAGCACTGCCACTGCTGCGGTTTCCCCAACATTTACTCC  
>HPV51\_Alpha\_333087\_nt6537\_L1\_Tile|1  
GTACAAATTTAACTATTAGCACTGCCACTGCTGCGGTTTCCCCAACATTTACTCCAAGTA  
>HPV51\_Alpha\_333087\_nt6542\_L1\_Tile|2  
AATTTAACTATTAGCACTGCCACTGCTGCGGTTTCCCCAACATTTACTCCAAGTAACTTT  
>HPV51\_Alpha\_333087\_nt6547\_L1\_Tile|1  
AACTATTAGCACTGCCACTGCTGCGGTTTCCCCAACATTTACTCCAAGTAACTTTAAGCA  
>HPV51\_Alpha\_333087\_nt6552\_L1\_Tile|1  
TTAGCACTGCCACTGCTGCGGTTTCCCCAACATTTACTCCAAGTAACTTTAAGCAATATA  
>HPV51\_Alpha\_333087\_nt6557\_L1\_Tile|1  
ACTGCCACTGCTGCGGTTTCCCCAACATTTACTCCAAGTAACTTTAAGCAATATATTAGG  
>HPV51\_Alpha\_333087\_nt6652\_L1\_Tile|1  
ATTATGTAAATTTACTTTAACTACAGAGGTAATGGCTTATTTACACACAATGGATCCTAC  
>HPV51\_Alpha\_333087\_nt6667\_L1\_Tile|1  
TTTAACTACAGAGGTAATGGCTTATTTACACACAATGGATCCTACCATTCTTGAACAGTG  
>HPV52\_Alpha\_397038\_nt5756\_L1\_Tile|1  
GCAGTTCTCGATTACTAACAGTAGGACATCCCTATTTTCTATTAAAAACACCAGTAGTG  
>HPV52\_Alpha\_397038\_nt5761\_L1\_Tile|1  
TCTCGATTACTAACAGTAGGACATCCCTATTTTCTATTAAAAACACCAGTAGTGGTAAT  
>HPV52\_Alpha\_397038\_nt5771\_L1\_Tile|1  
TAACAGTAGGACATCCCTATTTTCTATTAAAAACACCAGTAGTGGTAATGGTAAAAAAG  
>HPV52\_Alpha\_397038\_nt5776\_L1\_Tile|1  
GTAGGACATCCCTATTTTCTATTAAAAACACCAGTAGTGGTAATGGTAAAAAAGTTTTTA  
>HPV52\_Alpha\_397038\_nt5781\_L1\_Tile|1  
ACATCCCTATTTTCTATTAAAAACACCAGTAGTGGTAATGGTAAAAAAGTTTGTAGTTCC  
>HPV52\_Alpha\_397038\_nt5791\_L1\_Tile|1  
TTTTCTATTAAAAACACCAGTAGTGGTAATGGTAAAAAAGTTTGTAGTTCCCAAGGTGTCT  
>HPV52\_Alpha\_397038\_nt6021\_L1\_Tile|1  
AAACAAGTTTGATGATACTGAAACCAGTAACAAATATGCTGGTAAACCTGGTATAGATAA  
>HPV52\_Alpha\_397038\_nt6131\_L1\_Tile|1  
GATGCAAACCTCCTATAGGTGAACATTGGGGTAAGGGAACCCCTTGTAATAATAATTTCAG  
>HPV52\_Alpha\_397038\_nt6156\_L1\_Tile|1  
TTGGGGTAAGGGAACCCCTTGTAATAATAATTTCAGGAAATCCTGGGGATTGTCCTCCCCT  
>HPV52\_Alpha\_397038\_nt6161\_L1\_Tile|1  
GTAAGGGAACCCCTTGTAATAATAATTTCAGGAAATCCTGGGGATTGTCCTCCCCTACAGC  
>HPV52\_Alpha\_397038\_nt6166\_L1\_Tile|1  
GGAACCCCTTGTAATAATAATTTCAGGAAATCCTGGGGATTGTCCTCCCCTACAGCTCATT  
>HPV52\_Alpha\_397038\_nt6171\_L1\_Tile|1  
CCCTTGTAATAATAATTTCAGGAAATCCTGGGGATTGTCCTCCCCTACAGCTCATTAACAG  
>HPV52\_Alpha\_397038\_nt6176\_L1\_Tile|1  
GTAATAATAATTTCAGGAAATCCTGGGGATTGTCCTCCCCTACAGCTCATTAACAGTGTA  
>HPV52\_Alpha\_397038\_nt6436\_L1\_Tile|1  
AATAGGGCCGGTACCTTAGGTGACCCTGTGCCAGGTGATTTATATATACAAGGGTCTAAC  
>HPV52\_Alpha\_397038\_nt6446\_L1\_Tile|1  
GTACCTTAGGTGACCCTGTGCCAGGTGATTTATATATACAAGGGTCTAACTCTGGCAATA  
>HPV52\_Alpha\_397038\_nt6451\_L1\_Tile|1  
TTAGGTGACCCTGTGCCAGGTGATTTATATATACAAGGGTCTAACTCTGGCAATACTGCC  
>HPV52\_Alpha\_397038\_nt6461\_L1\_Tile|1  
CTGTGCCAGGTGATTTATATATACAAGGGTCTAACTCTGGCAATACTGCCACTGTACAAA  
>HPV52\_Alpha\_397038\_nt6466\_L1\_Tile|1  
CCAGGTGATTTATATATACAAGGGTCTAACTCTGGCAATACTGCCACTGTACAAAGCAGT  
>HPV52\_Alpha\_397038\_nt6471\_L1\_Tile|1

TGATTTATATATACAAGGGTCTAACTCTGGCAATACTGCCACTGTACAAAGCAGTGCTTT  
>HPV52\_Alpha\_397038\_nt6671\_L1\_Tile|1  
GTAGCTAACATGACTTTATGTGCTGAGGTTAAAAAGGAAAGCACATATAAAAATGAAA  
>HPV52\_Alpha\_397038\_nt6781\_L1\_Tile|1  
TTTCAATTGTGCAAAATTACATTAACAGCTGATGTTATGACATACATTCATAAGATGGAT  
>HPV52\_Alpha\_397038\_nt6786\_L1\_Tile|1  
ATTGTGCAAAATTACATTAACAGCTGATGTTATGACATACATTCATAAGATGGATGCCAC  
>HPV52\_Alpha\_397038\_nt6791\_L1\_Tile|1  
GCAAAATTACATTAACAGCTGATGTTATGACATACATTCATAAGATGGATGCCACTATTT  
>HPV52\_Alpha\_397038\_nt6891\_L1\_Tile|1  
ATCTTTGGAGGACACATACAGATTTGTCACTTCTACTGCTATAACTTGTCAAAAAACAC  
>HPV52\_Alpha\_397038\_nt6906\_L1\_Tile|1  
ATACAGATTTGTCACTTCTACTGCTATAACTTGTCAAAAAACACACCACCTAAAGGAAA  
>HPV52\_Alpha\_397038\_nt6911\_L1\_Tile|1  
GATTTGTCACTTCTACTGCTATAACTTGTCAAAAAACACACCACCTAAAGGAAAGGAAG  
>HPV52\_Alpha\_397038\_nt6916\_L1\_Tile|1  
GTCACCTTCTACTGCTATAACTTGTCAAAAAACACACCACCTAAAGGAAAGGAAGATCCT  
>HPV52\_Alpha\_397038\_nt6931\_L1\_Tile|1  
ATAACTTGTCAAAAAACACACCACCTAAAGGAAAGGAAGATCCTTTAAAGGACTATATG  
>HPV52\_Alpha\_397038\_nt7041\_L1\_Tile|1  
TCCTTTAGGTAGGAAGTTTTTGTACAGGCAGGGCTACAGGCTAGGCCCAAACCTAAAACG  
>HPV52\_Alpha\_397038\_nt7046\_L1\_Tile|1  
TAGGTAGGAAGTTTTTGTACAGGCAGGGCTACAGGCTAGGCCCAAACCTAAAACGCCCTG  
>HPV52\_Alpha\_397038\_nt7051\_L1\_Tile|1  
AGGAAGTTTTTGTACAGGCAGGGCTACAGGCTAGGCCCAAACCTAAAACGCCCTGCATCA  
>HPV52\_Alpha\_397038\_nt7056\_L1\_Tile|1  
GTTTTTGTACAGGCAGGGCTACAGGCTAGGCCCAAACCTAAAACGCCCTGCATCATCGGC  
>HPV52\_Alpha\_397038\_nt7071\_L1\_Tile|1  
AGGGCTACAGGCTAGGCCCAAACCTAAAACGCCCTGCATCATCGGCCCCACGTACCTCCAC  
>HPV52\_Alpha\_397038\_nt7076\_L1\_Tile|1  
TACAGGCTAGGCCCAAACCTAAAACGCCCTGCATCATCGGCCCCACGTACCTCCACAAAGA  
>HPV52\_Alpha\_397038\_nt7081\_L1\_Tile|1  
GCTAGGCCCAAACCTAAAACGCCCTGCATCATCGGCCCCACGTACCTCCACAAAGAAGAAA  
>HPV52\_Alpha\_397038\_nt7086\_L1\_Tile|1  
GCCCAAACCTAAAACGCCCTGCATCATCGGCCCCACGTACCTCCACAAAGAAGAAAAAGGT  
>HPV52\_Alpha\_397038\_nt7091\_L1\_Tile|1  
AACTAAAACGCCCTGCATCATCGGCCCCACGTACCTCCACAAAGAAGAAAAAGGTTAAAA  
>HPV52\_Alpha\_397038\_nt7096\_L1\_Tile|1  
AAACGCCCTGCATCATCGGCCCCACGTACCTCCACAAAGAAGAAAAAGGTTAAAAGGTAA  
>HPV53\_Alpha\_9627377\_nt5751\_L1\_Tile|1  
TATATTTTATCATGCTGGAAGCTCTCGCTTGCTTACCGTGGGACATCCTTATTACCCCAT  
>HPV53\_Alpha\_9627377\_nt5791\_L1\_Tile|1  
GGACATCCTTATTACCCCATTTCTAAATCTGGTAAAGCAGACATCCCTAAGGTGTCTGCA  
>HPV53\_Alpha\_9627377\_nt5796\_L1\_Tile|1  
TCCTTATTACCCCATTTCTAAATCTGGTAAAGCAGACATCCCTAAGGTGTCTGCATTTCA  
>HPV53\_Alpha\_9627377\_nt6136\_L1\_Tile|1  
CCCGCTATAGGTGAACACTGGACAAAGGGTACGGCCTGTCGTTCCACACCTACTACAGCG  
>HPV53\_Alpha\_9627377\_nt6161\_L1\_Tile|1  
AGGGTACGGCTGTCGTTCCACACCTACTACAGCGGGCGACTGCCCCCATTTGGAACCTTA  
>HPV53\_Alpha\_9627377\_nt6176\_L1\_Tile|1  
GTTCCACACCTACTACAGCGGGCGACTGCCCCCATTTGGAACCTTATCAATTCACCTATTG  
>HPV53\_Alpha\_9627377\_nt6251\_L1\_Tile|1  
TGGACACAGGTTTTGGTGCATTAAACTTTAAAGCTTTGCAGGAATCTAAATCTGATGTGC  
>HPV53\_Alpha\_9627377\_nt6441\_L1\_Tile|1  
AGGCGTTATTGGTGAGGAAATACCTAATGACTTATATATTAAGGGTAGTAATGGCAGGGA

>HPV53\_Alpha\_9627377\_nt6456\_L1\_Tile|1  
GGAAATACCTAATGACTTATATATTAAGGGTAGTAATGGCAGGGACCCGCCCCCTAGCTC  
>HPV53\_Alpha\_9627377\_nt6461\_L1\_Tile|1  
TACCTAATGACTTATATATTAAGGGTAGTAATGGCAGGGACCCGCCCCCTAGCTCTGTAT  
>HPV53\_Alpha\_9627377\_nt6466\_L1\_Tile|1  
AATGACTTATATATTAAGGGTAGTAATGGCAGGGACCCGCCCCCTAGCTCTGTATATGTT  
>HPV53\_Alpha\_9627377\_nt6816\_L1\_Tile|1  
TTTACATACTATGAATTCTACCTTACTGGAAGACTGGAATATAGGTTTGTGCGCTCCTGT  
>HPV53\_Alpha\_9627377\_nt6821\_L1\_Tile|1  
ATACTATGAATTCTACCTTACTGGAAGACTGGAATATAGGTTTGTGCGCTCCTGTTGCCA  
>HPV53\_Alpha\_9627377\_nt6831\_L1\_Tile|1  
TTCTACCTTACTGGAAGACTGGAATATAGGTTTGTGCGCTCCTGTTGCCACTAGCTTAGA  
>HPV53\_Alpha\_9627377\_nt6946\_L1\_Tile|1  
CCTCCTGAAAAGCAGGACCCACTATCTAAATATAAATTTTGGGAGGTCAATTTGCAAAAC  
>HPV53\_Alpha\_9627377\_nt6966\_L1\_Tile|1  
ACTATCTAAATATAAATTTTGGGAGGTCAATTTGCAAAACAGTTTTTCTGCTGATTTGGA  
>HPV53\_Alpha\_9627377\_nt6991\_L1\_Tile|1  
GTCAATTTGCAAAACAGTTTTTCTGCTGATTTGGATCAGTTTTCTCTTGGCAGGAAGTTT  
>HPV53\_Alpha\_9627377\_nt6996\_L1\_Tile|1  
TTTGCAAAACAGTTTTTCTGCTGATTTGGATCAGTTTTCTCTTGGCAGGAAGTTTTTAAT  
>HPV53\_Alpha\_9627377\_nt7081\_L1\_Tile|1  
CCTGTATCCTCTAAAAACGCTCTGCTTCTACTACATCTACCTCAGCCCCCTCCTCCAAG  
>HPV53\_Alpha\_9627377\_nt7086\_L1\_Tile|1  
ATCCTCTAAAAACGCTCTGCTTCTACTACATCTACCTCAGCCCCCTCCTCCAAGCGCAA  
>HPV54\_Alpha\_9628437\_nt5985\_L1\_Tile|1  
ATGATACTGAAAATGCACCTAAATATGTTGGTGCAGGAGCTGACAATAGGGAAAATGTTA  
>HPV54\_Alpha\_9628437\_nt5995\_L1\_Tile|1  
AAATGCACCTAAATATGTTGGTGCAGGAGCTGACAATAGGGAAAATGTTAGCATGGACTA  
>HPV54\_Alpha\_9628437\_nt6085\_L1\_Tile|1  
CACACCACCTATAGGTGAACACTGGGCTAAAGGCAACCTATGTACACCTAATACATTGGC  
>HPV54\_Alpha\_9628437\_nt6095\_L1\_Tile|1  
ATAGGTGAACACTGGGCTAAAGGCAACCTATGTACACCTAATACATTGGCTGCTGGTGAC  
>HPV54\_Alpha\_9628437\_nt6215\_L1\_Tile|1  
TTTGGGGCTATGGATTTTAAACCCCTACAAACCTCAAAAAGTGAGGTACCCCTTGATGTA  
>HPV54\_Alpha\_9628437\_nt6220\_L1\_Tile|1  
GGCTATGGATTTTAAACCCCTACAAACCTCAAAAAGTGAGGTACCCCTTGATGTAGCTAC  
>HPV54\_Alpha\_9628437\_nt6225\_L1\_Tile|1  
TGGATTTTAAACCCCTACAAACCTCAAAAAGTGAGGTACCCCTTGATGTAGCTACCTCAA  
>HPV54\_Alpha\_9628437\_nt6235\_L1\_Tile|1  
AACCCTACAAACCTCAAAAAGTGAGGTACCCCTTGATGTAGCTACCTCAATTTGTAAATA  
>HPV54\_Alpha\_9628437\_nt6240\_L1\_Tile|1  
TACAAACCTCAAAAAGTGAGGTACCCCTTGATGTAGCTACCTCAATTTGTAAATATCCTG  
>HPV54\_Alpha\_9628437\_nt6250\_L1\_Tile|1  
AAAAAGTGAGGTACCCCTTGATGTAGCTACCTCAATTTGTAAATATCCTGATTACCTTAA  
>HPV54\_Alpha\_9628437\_nt6415\_L1\_Tile|1  
ACCTAATGACTTATACATTAAGAAATCCTCAGGTAACCTTGACAGTTCTATTTATGCTGC  
>HPV54\_Alpha\_9628437\_nt6585\_L1\_Tile|1  
TTTTAACAGTTGTAGATACCACCCGTAGTACTAACCTAACATTGTGTGCTACAGCATCCA  
>HPV54\_Alpha\_9628437\_nt6605\_L1\_Tile|1  
ACCCGTAGTACTAACCTAACATTGTGTGCTACAGCATCCACGCAGGATAGCTTTAATAAT  
>HPV54\_Alpha\_9628437\_nt6610\_L1\_Tile|1  
TAGTACTAACCTAACATTGTGTGCTACAGCATCCACGCAGGATAGCTTTAATAATTCTGA  
>HPV54\_Alpha\_9628437\_nt6615\_L1\_Tile|1  
CTAACCTAACATTGTGTGCTACAGCATCCACGCAGGATAGCTTTAATAATTCTGACTTTA  
>HPV54\_Alpha\_9628437\_nt6620\_L1\_Tile|1

CTAACATTGTGTGCTACAGCATCCACGCAGGATAGCTTTAATAATTCTGACTTTAGGGAG  
>HPV54\_Alpha\_9628437\_nt6625\_L1\_Tile|1  
ATTGTGTGCTACAGCATCCACGCAGGATAGCTTTAATAATTCTGACTTTAGGGAGTATAT  
>HPV54\_Alpha\_9628437\_nt6635\_L1\_Tile|1  
ACAGCATCCACGCAGGATAGCTTTAATAATTCTGACTTTAGGGAGTATATTAGACATGTG  
>HPV54\_Alpha\_9628437\_nt6725\_L1\_Tile|1  
TTATGTACCATAACCCCTTACAGCAGATGTTATGGCCTATATTCATGGAATGAATCCCACT  
>HPV54\_Alpha\_9628437\_nt6730\_L1\_Tile|1  
TACCATAACCCCTTACAGCAGATGTTATGGCCTATATTCATGGAATGAATCCCACTATTCT  
>HPV54\_Alpha\_9628437\_nt6735\_L1\_Tile|1  
TAACCCCTTACAGCAGATGTTATGGCCTATATTCATGGAATGAATCCCACTATTCTAGAGG  
>HPV54\_Alpha\_9628437\_nt6770\_L1\_Tile|1  
GGAATGAATCCCACTATTCTAGAGGACTGGAACCTTTGGTATAACCCCCCAGCTACAAGT  
>HPV54\_Alpha\_9628437\_nt6805\_L1\_Tile|1  
TGGTATAACCCCCCAGCTACAAGTAGTTTGGAGGACACATATAGGTTTGTACAGTCACA  
>HPV54\_Alpha\_9628437\_nt6915\_L1\_Tile|1  
CTTACAGTAAATTTAATTTTTGGACTGTTGACCTTAAGGAACGATTTTCATCTGACCTTG  
>HPV54\_Alpha\_9628437\_nt6920\_L1\_Tile|1  
AGTAAATTTAATTTTTGGACTGTTGACCTTAAGGAACGATTTTCATCTGACCTTGACCAG  
>HPV54\_Alpha\_9628437\_nt6925\_L1\_Tile|1  
ATTTAATTTTTGGACTGTTGACCTTAAGGAACGATTTTCATCTGACCTTGACCAGTTTCC  
>HPV54\_Alpha\_9628437\_nt6930\_L1\_Tile|1  
ATTTTTGGACTGTTGACCTTAAGGAACGATTTTCATCTGACCTTGACCAGTTTCCCTTGG  
>HPV54\_Alpha\_9628437\_nt6990\_L1\_Tile|1  
GTCGCAAGTTTTTTACTACAGGCTGGCCTACGTGCACGTCCGCGCCTTCGGCCTGTAAAGC  
>HPV54\_Alpha\_9628437\_nt6995\_L1\_Tile|1  
AAGTTTTTTACTACAGGCTGGCCTACGTGCACGTCCGCGCCTTCGGCCTGTAAAGCGTGCA  
>HPV55\_Alpha\_1020266\_nt6470\_L1\_Tile|1  
ATAGGGCGGGAACGGTTGGAGAGGACATTCCACAGGATTTGGTTTTTAAAGGTGCTACTA  
>HPV55\_Alpha\_1020266\_nt6480\_L1\_Tile|1  
AACGGTTGGAGAGGACATTCCACAGGATTTGGTTTTTAAAGGTGCTACTAAAAGTACAGT  
>HPV55\_Alpha\_1020266\_nt6495\_L1\_Tile|1  
CATTCCACAGGATTTGGTTTTTAAAGGTGCTACTAAAAGTACAGTTCCTAATGCCATATA  
>HPV55\_Alpha\_1020266\_nt6705\_L1\_Tile|1  
CATGACAATATGTGCTGCTACAACCTCAGTCTCCATCTACAACATATAATAGTACAGAATA  
>HPV55\_Alpha\_1020266\_nt6715\_L1\_Tile|1  
TGTGCTGCTACAACCTCAGTCTCCATCTACAACATATAATAGTACAGAATATAAAACAATAC  
>HPV55\_Alpha\_1020266\_nt6720\_L1\_Tile|1  
TGCTACAACCTCAGTCTCCATCTACAACATATAATAGTACAGAATATAAAACAATACATGCG  
>HPV56\_Alpha\_397053\_nt5708\_L1\_Tile|1  
AGGCAGTTCACGATTGCTTGCCGTAGGACATCCCTATTACTCTGTGACTAAGGACAATAC  
>HPV56\_Alpha\_397053\_nt5713\_L1\_Tile|1  
GTTTACGATTGCTTGCCGTAGGACATCCCTATTACTCTGTGACTAAGGACAATACCAAAA  
>HPV56\_Alpha\_397053\_nt5728\_L1\_Tile|1  
CCGTAGGACATCCCTATTACTCTGTGACTAAGGACAATACCAAAAACAAACATTCCCAAAG  
>HPV56\_Alpha\_397053\_nt6033\_L1\_Tile|1  
ATATCAGTTGATGGCAAGCAAACACAGTTGTGTATTGTTGGATGTACTCCCGCTATGGGT  
>HPV56\_Alpha\_397053\_nt6058\_L1\_Tile|1  
AGTTGTGTATTGTTGGATGTACTCCCGCTATGGGTGAACATTGGACTAAAGGTGCTGTGT  
>HPV56\_Alpha\_397053\_nt6068\_L1\_Tile|1  
TGTTGGATGTACTCCCGCTATGGGTGAACATTGGACTAAAGGTGCTGTGTGTAAGTCCAC  
>HPV56\_Alpha\_397053\_nt6073\_L1\_Tile|1  
GATGTACTCCCGCTATGGGTGAACATTGGACTAAAGGTGCTGTGTGTAAGTCCACACAAG  
>HPV56\_Alpha\_397053\_nt6078\_L1\_Tile|1  
ACTCCCGCTATGGGTGAACATTGGACTAAAGGTGCTGTGTGTAAGTCCACACAAGTTACC

>HPV56\_Alpha\_397053\_nt6083\_L1\_Tile|1  
CGCTATGGGTGAACATTGGACTAAAGGTGCTGTGTGTAAGTCCACACAAGTTACCACAGG  
>HPV56\_Alpha\_397053\_nt6108\_L1\_Tile|1  
GGTGTGTGTGTAAGTCCACACAAGTTACCACAGGGGACTGCCCCGCTCTTGCAATTAATT  
>HPV56\_Alpha\_397053\_nt6118\_L1\_Tile|1  
GTAAGTCCACACAAGTTACCACAGGGGACTGCCCCGCTCTTGCAATTAATTAATACACCTA  
>HPV56\_Alpha\_397053\_nt6128\_L1\_Tile|1  
ACAAGTTACCACAGGGGACTGCCCCGCTCTTGCAATTAATTAATACACCTATAGAGGATGG  
>HPV56\_Alpha\_397053\_nt6368\_L1\_Tile|1  
ACATTATTTTAATAGGGCTGGTAAAGTTGGGGAAACAATACCTGCAGAGTTATATTTAAA  
>HPV56\_Alpha\_397053\_nt6383\_L1\_Tile|1  
GGCTGGTAAAGTTGGGGAAACAATACCTGCAGAGTTATATTTAAAGGGTAGCAATGGTAG  
>HPV56\_Alpha\_397053\_nt6408\_L1\_Tile|1  
CCTGCAGAGTTATATTTAAAGGGTAGCAATGGTAGAGAACCCCTCCGAGTTCTGTATAT  
>HPV56\_Alpha\_397053\_nt6413\_L1\_Tile|1  
AGAGTTATATTTAAAGGGTAGCAATGGTAGAGAACCCCTCCGAGTTCTGTATATGTTGC  
>HPV56\_Alpha\_397053\_nt6588\_L1\_Tile|1  
ACTGTAGTAGATACTACTAGAACTAACATGACTATTAGTACTGCTACAGAACAGTTA  
>HPV56\_Alpha\_397053\_nt6593\_L1\_Tile|1  
AGTAGATACTACTAGAACTAACATGACTATTAGTACTGCTACAGAACAGTTAAGTAA  
>HPV56\_Alpha\_397053\_nt6608\_L1\_Tile|1  
AAGTACTAACATGACTATTAGTACTGCTACAGAACAGTTAAGTAAATATGATGCACGAAA  
>HPV56\_Alpha\_397053\_nt6613\_L1\_Tile|1  
CTAACATGACTATTAGTACTGCTACAGAACAGTTAAGTAAATATGATGCACGAAAAATTA  
>HPV56\_Alpha\_397053\_nt6618\_L1\_Tile|1  
ATGACTATTAGTACTGCTACAGAACAGTTAAGTAAATATGATGCACGAAAAATTAATCAG  
>HPV56\_Alpha\_397053\_nt6628\_L1\_Tile|1  
GTACTGCTACAGAACAGTTAAGTAAATATGATGCACGAAAAATTAATCAGTACCTTAGAC  
>HPV56\_Alpha\_397053\_nt6633\_L1\_Tile|1  
GCTACAGAACAGTTAAGTAAATATGATGCACGAAAAATTAATCAGTACCTTAGACATGTG  
>HPV56\_Alpha\_397053\_nt6773\_L1\_Tile|1  
GAATGCTAACCTACTGGAGGACTGGAATATTGGGTTATCCCCGCCAGTGGCCACCAGCCT  
>HPV56\_Alpha\_397053\_nt6778\_L1\_Tile|1  
CTAACCTACTGGAGGACTGGAATATTGGGTTATCCCCGCCAGTGGCCACCAGCCTAGAAG  
>HPV56\_Alpha\_397053\_nt6803\_L1\_Tile|1  
TGGGTTATCCCCGCCAGTGGCCACCAGCCTAGAAGATAAATATAGATATGTTAGAAGCAC  
>HPV56\_Alpha\_397053\_nt6808\_L1\_Tile|1  
TATCCCCGCCAGTGGCCACCAGCCTAGAAGATAAATATAGATATGTTAGAAGCACAGCTA  
>HPV56\_Alpha\_397053\_nt6818\_L1\_Tile|1  
AGTGGCCACCAGCCTAGAAGATAAATATAGATATGTTAGAAGCACAGCTATAACATGTCA  
>HPV56\_Alpha\_397053\_nt6988\_L1\_Tile|1  
GAAAATTTTAAATGCAACTGGGCACTAGGTCAAAGCCTGCTGTAGCTACCTCTAAAAAGC  
>HPV56\_Alpha\_397053\_nt6993\_L1\_Tile|1  
TTTTTAAATGCAACTGGGCACTAGGTCAAAGCCTGCTGTAGCTACCTCTAAAAAGCGATCT  
>HPV56\_Alpha\_397053\_nt6998\_L1\_Tile|1  
AATGCAACTGGGCACTAGGTCAAAGCCTGCTGTAGCTACCTCTAAAAAGCGATCTGCTCC  
>HPV56\_Alpha\_397053\_nt7013\_L1\_Tile|1  
TAGGTCAAAGCCTGCTGTAGCTACCTCTAAAAAGCGATCTGCTCCTACCTCCACCTCTAC  
>HPV56\_Alpha\_397053\_nt7023\_L1\_Tile|1  
CCTGCTGTAGCTACCTCTAAAAAGCGATCTGCTCCTACCTCCACCTCTACACCAGCAAAA  
>HPV57\_Alpha\_60882\_nt5879\_L1\_Tile|1  
TCACAGTAGGCCATCCATATTATTCTATAAAAAAAGTGGCAATAATAAGGTGTCTGTGC  
>HPV57\_Alpha\_60882\_nt5884\_L1\_Tile|1  
GTAGGCCATCCATATTATTCTATAAAAAAAGTGGCAATAATAAGGTGTCTGTGCCCAAG  
>HPV57\_Alpha\_60882\_nt5894\_L1\_Tile|1

CATATTATTCTATAAAAAAAGTGGCAATAATAAGGTGTCTGTGCCCCAAGGTATCGGGCT  
>HPV57\_Alpha\_60882\_nt5989\_L1\_Tile|1  
CCTAATAAGTTTGGTCTGCCTGATGCCAACCTCTATGATCCCGACACCCAGCGTCTGCTG  
>HPV57\_Alpha\_60882\_nt6094\_L1\_Tile|1  
GTAGGGATATCCGGCCACCCTTATTATAACAAACAGGATGATACTGAAAATTCACACAAT  
>HPV57\_Alpha\_60882\_nt6099\_L1\_Tile|1  
GATATCCGGCCACCCTTATTATAACAAACAGGATGATACTGAAAATTCACACAATCCCGA  
>HPV57\_Alpha\_60882\_nt6349\_L1\_Tile|1  
ACCGGGTTTCGGGGCGCTGGATTTTGGCGCTCTACAGTCCAACAAATCAGATGTCCCCTTG  
>HPV57\_Alpha\_60882\_nt6364\_L1\_Tile|1  
CTGGATTTTGGCGCTCTACAGTCCAACAAATCAGATGTCCCCTTGGATATCTGTACTAAC  
>HPV57\_Alpha\_60882\_nt6369\_L1\_Tile|1  
TTTTGCGCTCTACAGTCCAACAAATCAGATGTCCCCTTGGATATCTGTACTAACATATG  
>HPV57\_Alpha\_60882\_nt6389\_L1\_Tile|1  
ACAAATCAGATGTCCCCTTGGATATCTGTACTAACATATGTAAATATCCAGACTATCTGA  
>HPV57\_Alpha\_60882\_nt6534\_L1\_Tile|1  
TGGGTCGATGGGTGACGCCCTCCCGGATGAGCTATATGTCAAGAGTTCTACCGTCCAGAC  
>HPV57\_Alpha\_60882\_nt6539\_L1\_Tile|1  
CGATGGGTGACGCCCTCCCGGATGAGCTATATGTCAAGAGTTCTACCGTCCAGACCCCCG  
>HPV57\_Alpha\_60882\_nt6544\_L1\_Tile|1  
GGTGACGCCCTCCCGGATGAGCTATATGTCAAGAGTTCTACCGTCCAGACCCCCGGTAGT  
>HPV57\_Alpha\_60882\_nt6549\_L1\_Tile|1  
CGCCCTCCCGGATGAGCTATATGTCAAGAGTTCTACCGTCCAGACCCCCGGTAGTTATGT  
>HPV57\_Alpha\_60882\_nt6554\_L1\_Tile|1  
TCCCGGATGAGCTATATGTCAAGAGTTCTACCGTCCAGACCCCCGGTAGTTATGTTTATA  
>HPV57\_Alpha\_60882\_nt6559\_L1\_Tile|1  
GATGAGCTATATGTCAAGAGTTCTACCGTCCAGACCCCCGGTAGTTATGTTTATACCTCC  
>HPV57\_Alpha\_60882\_nt6564\_L1\_Tile|1  
GCTATATGTCAAGAGTTCTACCGTCCAGACCCCCGGTAGTTATGTTTATACCTCCACTCC  
>HPV57\_Alpha\_60882\_nt6754\_L1\_Tile|1  
AGCACAAATGTCTCTTTGTGTGCCACTGTAACCACAGAACTAATTATAAAGCCTCCAAT  
>HPV57\_Alpha\_60882\_nt6759\_L1\_Tile|1  
AAATGTCTCTTTGTGTGCCACTGTAACCACAGAACTAATTATAAAGCCTCCAATTATAA  
>HPV57\_Alpha\_60882\_nt6944\_L1\_Tile|1  
ACTTTGGTGTCCCCCACCCTCGTCCGCCAGCCTGCAGGACACCTACAGGTATTTGCAAT  
>HPV57\_Alpha\_60882\_nt6984\_L1\_Tile|1  
CACCTACAGGTATTTGCAATCCCAAGCGATAACATGTCAGAAGCCCACACCCCCCTAAGAC  
>HPV58\_Alpha\_222386\_nt5766\_L1\_Tile|1  
ACTTTTGGCTGTTGGCAATCCATATTTTCCATCAAAAGTCCCAATAACAATAAAAAAGT  
>HPV58\_Alpha\_222386\_nt5776\_L1\_Tile|1  
GTTGGCAATCCATATTTTCCATCAAAAGTCCCAATAACAATAAAAAAGTATTAGTTCCC  
>HPV58\_Alpha\_222386\_nt5786\_L1\_Tile|1  
CATATTTTCCATCAAAAGTCCCAATAACAATAAAAAAGTATTAGTTCCCAAGGTATCAG  
>HPV58\_Alpha\_222386\_nt5791\_L1\_Tile|1  
TTTTCCATCAAAAGTCCCAATAACAATAAAAAAGTATTAGTTCCCAAGGTATCAGGCTTA  
>HPV58\_Alpha\_222386\_nt5796\_L1\_Tile|1  
CATCAAAAGTCCCAATAACAATAAAAAAGTATTAGTTCCCAAGGTATCAGGCTTACAGTA  
>HPV58\_Alpha\_222386\_nt5801\_L1\_Tile|1  
AAAGTCCCAATAACAATAAAAAAGTATTAGTTCCCAAGGTATCAGGCTTACAGTATAGGG  
>HPV58\_Alpha\_222386\_nt5806\_L1\_Tile|1  
CCCAATAACAATAAAAAAGTATTAGTTCCCAAGGTATCAGGCTTACAGTATAGGGTCTTT  
>HPV58\_Alpha\_222386\_nt6166\_L1\_Tile|1  
GCCTGTAACAATAATGCAGCTGCTACTGATTGTCTCCATTGGAACCTTTTAAATTCTATT  
>HPV58\_Alpha\_222386\_nt6431\_L1\_Tile|1  
GGGCTGGAAACTTGGCGAGGCTGTCCCGGATGACCTTTATATTAAAGGGTCCGGTAATA



>HPV58\_Alpha\_222386\_nt6436\_L1\_Tile|1  
GGAAAACCTTGGCGAGGCTGTCCCGGATGACCTTTATATTAAAGGGTCCGGTAATACTGCA  
>HPV58\_Alpha\_222386\_nt6441\_L1\_Tile|1  
ACTTGGCGAGGCTGTCCCGGATGACCTTTATATTAAAGGGTCCGGTAATACTGCAGTTAT  
>HPV58\_Alpha\_222386\_nt6446\_L1\_Tile|1  
GCGAGGCTGTCCCGGATGACCTTTATATTAAAGGGTCCGGTAATACTGCAGTTATCCAAA  
>HPV58\_Alpha\_222386\_nt6456\_L1\_Tile|1  
CCCGGATGACCTTTATATTAAAGGGTCCGGTAATACTGCAGTTATCCAAAGTAGTGCATT  
>HPV58\_Alpha\_222386\_nt6461\_L1\_Tile|1  
ATGACCTTTATATTAAAGGGTCCGGTAATACTGCAGTTATCCAAAGTAGTGCATTTTTTTC  
>HPV58\_Alpha\_222386\_nt6466\_L1\_Tile|1  
CTTTATATTAAAGGGTCCGGTAATACTGCAGTTATCCAAAGTAGTGCATTTTTTCCAACT  
>HPV58\_Alpha\_222386\_nt7041\_L1\_Tile|1  
GTTTTTATTACAATCAGGCCTTAAAGCAAAGCCCAGACTAAAACGTTTCGGCCCCCTACTAC  
>HPV58\_Alpha\_222386\_nt7046\_L1\_Tile|1  
TATTACAATCAGGCCTTAAAGCAAAGCCCAGACTAAAACGTTTCGGCCCCCTACTACCCGTG  
>HPV58\_Alpha\_222386\_nt7051\_L1\_Tile|1  
CAATCAGGCCTTAAAGCAAAGCCCAGACTAAAACGTTTCGGCCCCCTACTACCCGTGCACCA  
>HPV58\_Alpha\_222386\_nt7056\_L1\_Tile|1  
AGGCCTTAAAGCAAAGCCCAGACTAAAACGTTTCGGCCCCCTACTACCCGTGCACCATCCAC  
>HPV59\_Alpha\_557236\_nt5647\_L1\_Tile|1  
CTCCACCTTCGGTAGCTAAGGTTGTCAGCACTGATGAGTATGTCACCCGTACCAGTATTT  
>HPV59\_Alpha\_557236\_nt5652\_L1\_Tile|1  
CCTTCGGTAGCTAAGGTTGTCAGCACTGATGAGTATGTCACCCGTACCAGTATTTTCTAC  
>HPV59\_Alpha\_557236\_nt5662\_L1\_Tile|2  
CTAAGGTTGTCAGCACTGATGAGTATGTCACCCGTACCAGTATTTTCTACCACGCAGGCA  
>HPV59\_Alpha\_557236\_nt5677\_L1\_Tile|1  
CTGATGAGTATGTCACCCGTACCAGTATTTTCTACCACGCAGGCAGTTCAGACTTCTTA  
>HPV59\_Alpha\_557236\_nt5682\_L1\_Tile|2  
GAGTATGTCACCCGTACCAGTATTTTCTACCACGCAGGCAGTTCAGACTTCTTACAGTT  
>HPV59\_Alpha\_557236\_nt5722\_L1\_Tile|2  
GTTCCAGACTTCTTACAGTTGGACATCCATATTTTAAAGTACCTAAAGGTGGTAATGGTA  
>HPV59\_Alpha\_557236\_nt5727\_L1\_Tile|1  
AGACTTCTTACAGTTGGACATCCATATTTTAAAGTACCTAAAGGTGGTAATGGTAGACAG  
>HPV59\_Alpha\_557236\_nt5842\_L1\_Tile|2  
ATCCCAATAAATTTGGCCTTCCAGATAACACAGTATATGATCCTAACTCTCAACGCTTGG  
>HPV59\_Alpha\_557236\_nt5862\_L1\_Tile|2  
CCAGATAACACAGTATATGATCCTAACTCTCAACGCTTGGTCTGGGCCTGTGTAGGTGTT  
>HPV59\_Alpha\_557236\_nt5972\_L1\_Tile|1  
ATATAATAAATTTGGATGACACTGAAAACCTCTCATGTAGCATCTGCTGTTGATACCAAAGA  
>HPV59\_Alpha\_557236\_nt5977\_L1\_Tile|1  
ATAAATTGGATGACACTGAAAACCTCTCATGTAGCATCTGCTGTTGATACCAAAGATACAC  
>HPV59\_Alpha\_557236\_nt5982\_L1\_Tile|2  
TTGGATGACACTGAAAACCTCTCATGTAGCATCTGCTGTTGATACCAAAGATACACGTGAT  
>HPV59\_Alpha\_557236\_nt5987\_L1\_Tile|1  
TGACACTGAAAACCTCTCATGTAGCATCTGCTGTTGATACCAAAGATACACGTGATAATGT  
>HPV59\_Alpha\_557236\_nt6002\_L1\_Tile|2  
TCATGTAGCATCTGCTGTTGATACCAAAGATACACGTGATAATGTATCTGTGGATTATAA  
>HPV59\_Alpha\_557236\_nt6117\_L1\_Tile|1  
AAGGGCACTGCTTGTAAGCCTACTACTGTGGTTCAGGGCGATTGTCCCTCCACTAGAATTA  
>HPV59\_Alpha\_557236\_nt6127\_L1\_Tile|1  
CTTGTAAGCCTACTACTGTGGTTCAGGGCGATTGTCCCTCCACTAGAATTAATAAATACAC  
>HPV59\_Alpha\_557236\_nt6417\_L1\_Tile|1  
CTTCCTGAATCACTATATATTAAAGGTACTGACATACGTGCCAACCCAGGCAGTTATTTA  
>HPV59\_Alpha\_557236\_nt6422\_L1\_Tile|2

TGAATCACTATATATTAAAGGTACTGACATACGTGCCAACCCAGGCAGTTATTTATATTC  
>HPV59\_Alpha\_557236\_nt6427\_L1\_Tile|1  
CACTATATATTTAAAGGTACTGACATACGTGCCAACCCAGGCAGTTATTTATATTCCTT  
>HPV59\_Alpha\_557236\_nt6432\_L1\_Tile|1  
TATATTAAAGGTACTGACATACGTGCCAACCCAGGCAGTTATTTATATTCCTTCCCCA  
>HPV59\_Alpha\_557236\_nt6442\_L1\_Tile|2  
GTACTGACATACGTGCCAACCCAGGCAGTTATTTATATTCCTTCCCCAAGTGGGTCTG  
>HPV59\_Alpha\_557236\_nt6602\_L1\_Tile|2  
AGTTGTAGATACTACTCGCAGCACCAATCTTTCTGTGTGTGCTTCTACTACTTCTTCTAT  
>HPV59\_Alpha\_557236\_nt6607\_L1\_Tile|1  
TAGATACTACTCGCAGCACCAATCTTTCTGTGTGTGCTTCTACTACTTCTTCTATTCCTA  
>HPV59\_Alpha\_557236\_nt6612\_L1\_Tile|1  
ACTACTCGCAGCACCAATCTTTCTGTGTGTGCTTCTACTACTTCTTCTATTCCTAATGTA  
>HPV59\_Alpha\_557236\_nt6617\_L1\_Tile|1  
TCGCAGCACCAATCTTTCTGTGTGTGCTTCTACTACTTCTTCTATTCCTAATGTATACAC  
>HPV59\_Alpha\_557236\_nt6627\_L1\_Tile|1  
AATCTTTCTGTGTGTGCTTCTACTACTTCTTCTATTCCTAATGTATACACACCTACCAGT  
>HPV59\_Alpha\_557236\_nt6632\_L1\_Tile|1  
TTCTGTGTGTGCTTCTACTACTTCTTCTATTCCTAATGTATACACACCTACCAGTTTTAA  
>HPV59\_Alpha\_557236\_nt6637\_L1\_Tile|1  
TGTGTGCTTCTACTACTTCTTCTATTCCTAATGTATACACACCTACCAGTTTTAAAGAAT  
>HPV59\_Alpha\_557236\_nt6642\_L1\_Tile|2  
GCTTCTACTACTTCTTCTATTCCTAATGTATACACACCTACCAGTTTTAAAGAATATGCC  
>HPV59\_Alpha\_557236\_nt6652\_L1\_Tile|1  
CTTCTTCTATTCCTAATGTATACACACCTACCAGTTTTAAAGAATATGCCAGACATGTGG  
>HPV59\_Alpha\_557236\_nt6737\_L1\_Tile|1  
TCAACTGTGTAATAACATTAACCTACAGAGGTAATGTCATACATTCATAATATGAATAC  
>HPV59\_Alpha\_557236\_nt6742\_L1\_Tile|2  
TGTGTAATAATAACATTAACCTACAGAGGTAATGTCATACATTCATAATATGAATACCACTA  
>HPV59\_Alpha\_557236\_nt6817\_L1\_Tile|1  
ATTTTGGTGTTACACCACCTCCTACTGCTAGTTTAGTTGACACATACCGTTTTGTTCAAT  
>HPV59\_Alpha\_557236\_nt6822\_L1\_Tile|2  
GGTGTTACACCACCTCCTACTGCTAGTTTAGTTGACACATACCGTTTTGTTCAATCTGCT  
>HPV59\_Alpha\_557236\_nt6827\_L1\_Tile|1  
TACACCACCTCCTACTGCTAGTTTAGTTGACACATACCGTTTTGTTCAATCTGCTGCTGT  
>HPV59\_Alpha\_557236\_nt6832\_L1\_Tile|1  
CACCTCCTACTGCTAGTTTAGTTGACACATACCGTTTTGTTCAATCTGCTGCTGTAACCT  
>HPV59\_Alpha\_557236\_nt6842\_L1\_Tile|2  
TGCTAGTTTAGTTGACACATACCGTTTTGTTCAATCTGCTGCTGTAACCTGTCAAAGGA  
>HPV59\_Alpha\_557236\_nt6862\_L1\_Tile|2  
ACCGTTTTGTTCAATCTGCTGCTGTAACCTGTCAAAGGACACCGCACCGCCAGTTAAAC  
>HPV59\_Alpha\_557236\_nt6867\_L1\_Tile|1  
TTTGTTCAATCTGCTGCTGTAACCTGTCAAAGGACACCGCACCGCCAGTTAAACAGGAC  
>HPV59\_Alpha\_557236\_nt6882\_L1\_Tile|2  
GCTGTAACCTGTCAAAGGACACCGCACCGCCAGTTAAACAGGACCCTTATGACAAACTA  
>HPV59\_Alpha\_557236\_nt6887\_L1\_Tile|1  
AACTTGTCAAAGGACACCGCACCGCCAGTTAAACAGGACCCTTATGACAAACTAAAGTT  
>HPV59\_Alpha\_557236\_nt6892\_L1\_Tile|1  
GTCAAAGGACACCGCACCGCCAGTTAAACAGGACCCTTATGACAAACTAAAGTTTTGGC  
>HPV59\_Alpha\_557236\_nt6907\_L1\_Tile|1  
CACCGCCAGTTAAACAGGACCCTTATGACAAACTAAAGTTTTGGCCTGTAGATCTTAAGG  
>HPV59\_Alpha\_557236\_nt6912\_L1\_Tile|1  
CCAGTTAAACAGGACCCTTATGACAAACTAAAGTTTTGGCCTGTAGATCTTAAGGAAAGG  
>HPV59\_Alpha\_557236\_nt7042\_L1\_Tile|2  
CCACTATAGGCCACGCAAACGTGCAGCGCCTGCCCTACCTCTACCCCATCACCAAAAC

>HPV59\_Alpha\_557236\_nt7057\_L1\_Tile|1  
GCAAACGTGCAGCGCCTGCCCTACCTCTACCCCATCACCAAACGTGTTAAGCGTCGCA  
>HPV60\_Gamma\_9628566\_nt5401\_L1\_Tile|1  
TCTTTGGTTGCAGACAGCTGGACAATTGTATCTTCCACCAAGCAAGCCTGTTGCTCGTGT  
>HPV60\_Gamma\_9628566\_nt5411\_L1\_Tile|1  
CAGACAGCTGGACAATTGTATCTTCCACCAAGCAAGCCTGTTGCTCGTGTACTCAGTACG  
>HPV60\_Gamma\_9628566\_nt5436\_L1\_Tile|1  
CACCAAGCAAGCCTGTTGCTCGTGTACTCAGTACGGATGAATATGTACAGCCAACAAATT  
>HPV60\_Gamma\_9628566\_nt5441\_L1\_Tile|1  
AGCAAGCCTGTTGCTCGTGTACTCAGTACGGATGAATATGTACAGCCAACAAATTTAGTT  
>HPV60\_Gamma\_9628566\_nt5446\_L1\_Tile|1  
GCCTGTTGCTCGTGTACTCAGTACGGATGAATATGTACAGCCAACAAATTTAGTTTTTCA  
>HPV60\_Gamma\_9628566\_nt5451\_L1\_Tile|1  
TTGCTCGTGTACTCAGTACGGATGAATATGTACAGCCAACAAATTTAGTTTTTCATACAG  
>HPV60\_Gamma\_9628566\_nt5456\_L1\_Tile|1  
CGTGTACTCAGTACGGATGAATATGTACAGCCAACAAATTTAGTTTTTCATACAGGAACT  
>HPV60\_Gamma\_9628566\_nt5461\_L1\_Tile|1  
ACTCAGTACGGATGAATATGTACAGCCAACAAATTTAGTTTTTCATACAGGAACTGACAG  
>HPV60\_Gamma\_9628566\_nt5466\_L1\_Tile|1  
GTACGGATGAATATGTACAGCCAACAAATTTAGTTTTTCATACAGGAACTGACAGAATGC  
>HPV60\_Gamma\_9628566\_nt5471\_L1\_Tile|1  
GATGAATATGTACAGCCAACAAATTTAGTTTTTCATACAGGAACTGACAGAATGCTAATT  
>HPV60\_Gamma\_9628566\_nt5476\_L1\_Tile|1  
ATATGTACAGCCAACAAATTTAGTTTTTCATACAGGAACTGACAGAATGCTAATTGTAGG  
>HPV60\_Gamma\_9628566\_nt5486\_L1\_Tile|1  
CCAACAAATTTAGTTTTTCATACAGGAACTGACAGAATGCTAATTGTAGGACACCCTTAT  
>HPV60\_Gamma\_9628566\_nt5491\_L1\_Tile|1  
AAATTTAGTTTTTCATACAGGAACTGACAGAATGCTAATTGTAGGACACCCTTATTTTGA  
>HPV60\_Gamma\_9628566\_nt5496\_L1\_Tile|1  
TAGTTTTTCATACAGGAACTGACAGAATGCTAATTGTAGGACACCCTTATTTTGATATTA  
>HPV60\_Gamma\_9628566\_nt5501\_L1\_Tile|1  
TTTCATACAGGAACTGACAGAATGCTAATTGTAGGACACCCTTATTTTGATATTATAGAC  
>HPV60\_Gamma\_9628566\_nt5506\_L1\_Tile|1  
TACAGGAACTGACAGAATGCTAATTGTAGGACACCCTTATTTTGATATTATAGACAGTGG  
>HPV60\_Gamma\_9628566\_nt5511\_L1\_Tile|1  
GAACTGACAGAATGCTAATTGTAGGACACCCTTATTTTGATATTATAGACAGTGGTTCAA  
>HPV60\_Gamma\_9628566\_nt5516\_L1\_Tile|1  
GACAGAATGCTAATTGTAGGACACCCTTATTTTGATATTATAGACAGTGGTTCAAATAAT  
>HPV60\_Gamma\_9628566\_nt5521\_L1\_Tile|1  
AATGCTAATTGTAGGACACCCTTATTTTGATATTATAGACAGTGGTTCAAATAATATTAC  
>HPV60\_Gamma\_9628566\_nt5526\_L1\_Tile|1  
TAATTGTAGGACACCCTTATTTTGATATTATAGACAGTGGTTCAAATAATATTACTGTAC  
>HPV60\_Gamma\_9628566\_nt5531\_L1\_Tile|1  
GTAGGACACCCTTATTTTGATATTATAGACAGTGGTTCAAATAATATTACTGTACCTAAA  
>HPV60\_Gamma\_9628566\_nt5536\_L1\_Tile|1  
ACACCCTTATTTTGATATTATAGACAGTGGTTCAAATAATATTACTGTACCTAAATGTAG  
>HPV60\_Gamma\_9628566\_nt5541\_L1\_Tile|1  
CTTATTTTGATATTATAGACAGTGGTTCAAATAATATTACTGTACCTAAATGTAGTGGAA  
>HPV60\_Gamma\_9628566\_nt5546\_L1\_Tile|1  
TTTGATATTATAGACAGTGGTTCAAATAATATTACTGTACCTAAATGTAGTGGAAATCAG  
>HPV60\_Gamma\_9628566\_nt5551\_L1\_Tile|1  
TATTATAGACAGTGGTTCAAATAATATTACTGTACCTAAATGTAGTGGAAATCAGTTTAG  
>HPV60\_Gamma\_9628566\_nt5556\_L1\_Tile|1  
TAGACAGTGGTTCAAATAATATTACTGTACCTAAATGTAGTGGAAATCAGTTTAGAGTTA  
>HPV60\_Gamma\_9628566\_nt5561\_L1\_Tile|1

AGTGGTTCAAATAATATTACTGTACCTAAATGTAGTGGAATCAGTTTAGAGTTATGCGA  
>HPV60\_Gamma\_9628566\_nt5566\_L1\_Tile|1  
TTCAAATAATATTACTGTACCTAAATGTAGTGGAATCAGTTTAGAGTTATGCGACTACT  
>HPV60\_Gamma\_9628566\_nt5571\_L1\_Tile|1  
ATAATATTACTGTACCTAAATGTAGTGGAATCAGTTTAGAGTTATGCGACTACTATTTTC  
>HPV60\_Gamma\_9628566\_nt5601\_L1\_Tile|1  
ATCAGTTTAGAGTTATGCGACTACTATTTCCAGATCCAAACAAATTTGCAATGATAGACA  
>HPV60\_Gamma\_9628566\_nt5606\_L1\_Tile|1  
TTTAGAGTTATGCGACTACTATTTCCAGATCCAAACAAATTTGCAATGATAGACAGAGCT  
>HPV60\_Gamma\_9628566\_nt5611\_L1\_Tile|1  
AGTTATGCGACTACTATTTCCAGATCCAAACAAATTTGCAATGATAGACAGAGCTGTCTT  
>HPV60\_Gamma\_9628566\_nt5616\_L1\_Tile|1  
TGCGACTACTATTTCCAGATCCAAACAAATTTGCAATGATAGACAGAGCTGTCTTTAACC  
>HPV60\_Gamma\_9628566\_nt5626\_L1\_Tile|1  
ATTTCCAGATCCAAACAAATTTGCAATGATAGACAGAGCTGTCTTTAACCCAGAAAGAGA  
>HPV60\_Gamma\_9628566\_nt5631\_L1\_Tile|1  
CAGATCCAAACAAATTTGCAATGATAGACAGAGCTGTCTTTAACCCAGAAAGAGAGAGAT  
>HPV60\_Gamma\_9628566\_nt5636\_L1\_Tile|1  
CCAAACAAATTTGCAATGATAGACAGAGCTGTCTTTAACCCAGAAAGAGAGAGATTAGTC  
>HPV60\_Gamma\_9628566\_nt5641\_L1\_Tile|1  
CAAATTTGCAATGATAGACAGAGCTGTCTTTAACCCAGAAAGAGAGAGATTAGTCTGGAG  
>HPV60\_Gamma\_9628566\_nt5646\_L1\_Tile|1  
TTGCAATGATAGACAGAGCTGTCTTTAACCCAGAAAGAGAGAGATTAGTCTGGAGATTGG  
>HPV60\_Gamma\_9628566\_nt5651\_L1\_Tile|1  
ATGATAGACAGAGCTGTCTTTAACCCAGAAAGAGAGAGATTAGTCTGGAGATTGGAAGGC  
>HPV60\_Gamma\_9628566\_nt5661\_L1\_Tile|1  
GAGCTGTCTTTAACCCAGAAAGAGAGAGATTAGTCTGGAGATTGGAAGGCCTTGAAATTG  
>HPV60\_Gamma\_9628566\_nt5666\_L1\_Tile|1  
GTCTTTAACCCAGAAAGAGAGAGATTAGTCTGGAGATTGGAAGGCCTTGAAATTGGTAGA  
>HPV60\_Gamma\_9628566\_nt5671\_L1\_Tile|1  
TAACCCAGAAAGAGAGAGATTAGTCTGGAGATTGGAAGGCCTTGAAATTGGTAGAGGTGG  
>HPV60\_Gamma\_9628566\_nt5676\_L1\_Tile|1  
CAGAAAGAGAGAGATTAGTCTGGAGATTGGAAGGCCTTGAAATTGGTAGAGGTGGGCCTT  
>HPV60\_Gamma\_9628566\_nt5761\_L1\_Tile|1  
ATTATTTAATAAATATGGAGATACAGAAAATCCTGCCGCATATCCTTTAAAGCAGAATAA  
>HPV60\_Gamma\_9628566\_nt5766\_L1\_Tile|1  
TTAATAAATATGGAGATACAGAAAATCCTGCCGCATATCCTTTAAAGCAGAATAATGGTG  
>HPV60\_Gamma\_9628566\_nt5771\_L1\_Tile|1  
AAATATGGAGATACAGAAAATCCTGCCGCATATCCTTTAAAGCAGAATAATGGTGATGAC  
>HPV60\_Gamma\_9628566\_nt5776\_L1\_Tile|1  
TGGAGATACAGAAAATCCTGCCGCATATCCTTTAAAGCAGAATAATGGTGATGACAATAG  
>HPV60\_Gamma\_9628566\_nt5781\_L1\_Tile|1  
ATACAGAAAATCCTGCCGCATATCCTTTAAAGCAGAATAATGGTGATGACAATAGAATGG  
>HPV60\_Gamma\_9628566\_nt5786\_L1\_Tile|1  
GAAAATCCTGCCGCATATCCTTTAAAGCAGAATAATGGTGATGACAATAGAATGGATGTT  
>HPV60\_Gamma\_9628566\_nt5796\_L1\_Tile|1  
CCGCATATCCTTTAAAGCAGAATAATGGTGATGACAATAGAATGGATGTTTCAATGGATC  
>HPV60\_Gamma\_9628566\_nt5806\_L1\_Tile|1  
TTTAAAGCAGAATAATGGTGATGACAATAGAATGGATGTTTCAATGGATCCAAAACAAAT  
>HPV60\_Gamma\_9628566\_nt5811\_L1\_Tile|1  
AGCAGAATAATGGTGATGACAATAGAATGGATGTTTCAATGGATCCAAAACAAATGCAAT  
>HPV60\_Gamma\_9628566\_nt5816\_L1\_Tile|1  
AATAATGGTGATGACAATAGAATGGATGTTTCAATGGATCCAAAACAAATGCAATTGTTT  
>HPV60\_Gamma\_9628566\_nt5831\_L1\_Tile|1  
AATAGAATGGATGTTTCAATGGATCCAAAACAAATGCAATTGTTTATTGTAGGATGTAA

>HPV60\_Gamma\_9628566\_nt5836\_L1\_Tile|1  
AATGGATGTTTCAATGGATCCAAAACAAATGCAATTGTTTATTGTAGGATGTAAACCAGC  
>HPV60\_Gamma\_9628566\_nt5841\_L1\_Tile|1  
ATGTTTCAATGGATCCAAAACAAATGCAATTGTTTATTGTAGGATGTAAACCAGCCACTG  
>HPV60\_Gamma\_9628566\_nt5866\_L1\_Tile|1  
GCAATTGTTTATTGTAGGATGTAAACCAGCCACTGGTGAACACTGGGATATTGCTAAACC  
>HPV60\_Gamma\_9628566\_nt5881\_L1\_Tile|1  
AGGATGTAAACCAGCCACTGGTGAACACTGGGATATTGCTAAACCTTGTGATCCTGCTCC  
>HPV60\_Gamma\_9628566\_nt5886\_L1\_Tile|1  
GTAAACCAGCCACTGGTGAACACTGGGATATTGCTAAACCTTGTGATCCTGCTCCAGCAA  
>HPV60\_Gamma\_9628566\_nt5906\_L1\_Tile|1  
CACTGGGATATTGCTAAACCTTGTGATCCTGCTCCAGCAAAAGGATCCTGTCCCCCAATT  
>HPV60\_Gamma\_9628566\_nt5911\_L1\_Tile|1  
GGATATTGCTAAACCTTGTGATCCTGCTCCAGCAAAAGGATCCTGTCCCCCAATTAAATT  
>HPV60\_Gamma\_9628566\_nt5921\_L1\_Tile|1  
AAACCTTGTGATCCTGCTCCAGCAAAAGGATCCTGTCCCCCAATTAAATTAACACAGTCT  
>HPV60\_Gamma\_9628566\_nt5926\_L1\_Tile|1  
TTGTGATCCTGCTCCAGCAAAAGGATCCTGTCCCCCAATTAAATTAACACAGTCTATAAT  
>HPV60\_Gamma\_9628566\_nt5941\_L1\_Tile|1  
AGCAAAAGGATCCTGTCCCCCAATTAAATTAACACAGTCTATAATTCAGGACGGTGAAAT  
>HPV60\_Gamma\_9628566\_nt5946\_L1\_Tile|1  
AAGGATCCTGTCCCCCAATTAAATTAACACAGTCTATAATTCAGGACGGTGAAATGTGCG  
>HPV60\_Gamma\_9628566\_nt5961\_L1\_Tile|1  
CAATTAATTAACACAGTCTATAATTCAGGACGGTGAAATGTGCGATACAGGCTTTGGAA  
>HPV60\_Gamma\_9628566\_nt5966\_L1\_Tile|1  
AAATTAACACAGTCTATAATTCAGGACGGTGAAATGTGCGATACAGGCTTTGGAAATGCA  
>HPV60\_Gamma\_9628566\_nt5976\_L1\_Tile|1  
AGTCTATAATTCAGGACGGTGAAATGTGCGATACAGGCTTTGGAAATGCAAATTTTATTA  
>HPV60\_Gamma\_9628566\_nt5991\_L1\_Tile|1  
ACGGTGAAATGTGCGATACAGGCTTTGGAAATGCAAATTTTATTACCTTGCAAGAAGATA  
>HPV60\_Gamma\_9628566\_nt5996\_L1\_Tile|1  
GAAATGTGCGATACAGGCTTTGGAAATGCAAATTTTATTACCTTGCAAGAAGATAAATCA  
>HPV60\_Gamma\_9628566\_nt6011\_L1\_Tile|1  
GGCTTTGGAAATGCAAATTTTATTACCTTGCAAGAAGATAAATCAGGTGTTCTCTAGAT  
>HPV60\_Gamma\_9628566\_nt6016\_L1\_Tile|1  
TGGAAATGCAAATTTTATTACCTTGCAAGAAGATAAATCAGGTGTTCTCTAGATATTAC  
>HPV60\_Gamma\_9628566\_nt6021\_L1\_Tile|1  
ATGCAAATTTTATTACCTTGCAAGAAGATAAATCAGGTGTTCTCTAGATATTACCAATG  
>HPV60\_Gamma\_9628566\_nt6026\_L1\_Tile|1  
AATTTTATTACCTTGCAAGAAGATAAATCAGGTGTTCTCTAGATATTACCAATGAAATT  
>HPV60\_Gamma\_9628566\_nt6031\_L1\_Tile|1  
TATTACCTTGCAAGAAGATAAATCAGGTGTTCTCTAGATATTACCAATGAAATTTGTAA  
>HPV60\_Gamma\_9628566\_nt6036\_L1\_Tile|1  
CCTTGCAAGAAGATAAATCAGGTGTTCTCTAGATATTACCAATGAAATTTGTAAATATC  
>HPV60\_Gamma\_9628566\_nt6056\_L1\_Tile|1  
GGTGTTCCTCTAGATATTACCAATGAAATTTGTAAATATCCTGATTTACTAAAAATGACA  
>HPV60\_Gamma\_9628566\_nt6061\_L1\_Tile|1  
TCCTCTAGATATTACCAATGAAATTTGTAAATATCCTGATTTACTAAAAATGACAAAAGA  
>HPV60\_Gamma\_9628566\_nt6066\_L1\_Tile|1  
TAGATATTACCAATGAAATTTGTAAATATCCTGATTTACTAAAAATGACAAAAGATATCT  
>HPV60\_Gamma\_9628566\_nt6081\_L1\_Tile|1  
AAATTTGTAAATATCCTGATTTACTAAAAATGACAAAAGATATCTATGGAGATGCAGTAT  
>HPV60\_Gamma\_9628566\_nt6136\_L1\_Tile|1  
AGTATTTTCTTTGGTAAACGTGAACAAATTTATTCAGGCATTATTTTGTAAAGAGGAGG  
>HPV60\_Gamma\_9628566\_nt6146\_L1\_Tile|1

TTTGGTAAACGTGAACAAATTTATTCCAGGCATTATTTTGTAAAGAGGAGGGATAGATGGA  
>HPV60\_Gamma\_9628566\_nt6151\_L1\_Tile|1  
TAAACGTGAACAAATTTATTCCAGGCATTATTTTGTAAAGAGGAGGGATAGATGGAGATAG  
>HPV60\_Gamma\_9628566\_nt6156\_L1\_Tile|1  
GTGAACAAATTTATTCCAGGCATTATTTTGTAAAGAGGAGGGATAGATGGAGATAGTTTGC  
>HPV60\_Gamma\_9628566\_nt6166\_L1\_Tile|1  
TTATTCCAGGCATTATTTTGTAAAGAGGAGGGATAGATGGAGATAGTTTGCCAGATTCTGG  
>HPV60\_Gamma\_9628566\_nt6171\_L1\_Tile|1  
CCAGGCATTATTTTGTAAAGAGGAGGGATAGATGGAGATAGTTTGCCAGATTCTGGATATT  
>HPV60\_Gamma\_9628566\_nt6181\_L1\_Tile|1  
TTTTGTAAAGAGGAGGGATAGATGGAGATAGTTTGCCAGATTCTGGATATTACTTAGCACC  
>HPV60\_Gamma\_9628566\_nt6186\_L1\_Tile|1  
TAAGAGGAGGGATAGATGGAGATAGTTTGCCAGATTCTGGATATTACTTAGCACCACAAA  
>HPV60\_Gamma\_9628566\_nt6191\_L1\_Tile|1  
GGAGGGATAGATGGAGATAGTTTGCCAGATTCTGGATATTACTTAGCACCACAACTGAT  
>HPV60\_Gamma\_9628566\_nt6196\_L1\_Tile|1  
GATAGATGGAGATAGTTTGCCAGATTCTGGATATTACTTAGCACCACAACTGATAAACCC  
>HPV60\_Gamma\_9628566\_nt6201\_L1\_Tile|1  
ATGGAGATAGTTTGCCAGATTCTGGATATTACTTAGCACCACAACTGATAAACCTCAA  
>HPV60\_Gamma\_9628566\_nt6206\_L1\_Tile|1  
GATAGTTTGCCAGATTCTGGATATTACTTAGCACCACAACTGATAAACCTCAAAATAAC  
>HPV60\_Gamma\_9628566\_nt6211\_L1\_Tile|1  
TTTGCCAGATTCTGGATATTACTTAGCACCACAACTGATAAACCTCAAAATAACCTTGG  
>HPV60\_Gamma\_9628566\_nt6216\_L1\_Tile|1  
CAGATTCTGGATATTACTTAGCACCACAACTGATAAACCTCAAAATAACCTTGGTGGTT  
>HPV60\_Gamma\_9628566\_nt6221\_L1\_Tile|1  
TCTGGATATTACTTAGCACCACAACTGATAAACCTCAAAATAACCTTGGTGGTTATAGT  
>HPV60\_Gamma\_9628566\_nt6226\_L1\_Tile|1  
ATATTACTTAGCACCACAACTGATAAACCTCAAAATAACCTTGGTGGTTATAGTTACTT  
>HPV60\_Gamma\_9628566\_nt6231\_L1\_Tile|1  
ACTTAGCACCACAACTGATAAACCTCAAAATAACCTTGGTGGTTATAGTTACTTCCCTA  
>HPV60\_Gamma\_9628566\_nt6241\_L1\_Tile|1  
ACAACTGATAAACCTCAAAATAACCTTGGTGGTTATAGTTACTTCCCTACACCAAGTGG  
>HPV60\_Gamma\_9628566\_nt6246\_L1\_Tile|1  
CTGATAAACCTCAAAATAACCTTGGTGGTTATAGTTACTTCCCTACACCAAGTGGTTCTG  
>HPV60\_Gamma\_9628566\_nt6251\_L1\_Tile|1  
AAACCTCAAAATAACCTTGGTGGTTATAGTTACTTCCCTACACCAAGTGGTTCTGTAGCT  
>HPV60\_Gamma\_9628566\_nt6256\_L1\_Tile|1  
TCAAAATAACCTTGGTGGTTATAGTTACTTCCCTACACCAAGTGGTTCTGTAGCTTCTAG  
>HPV60\_Gamma\_9628566\_nt6261\_L1\_Tile|1  
ATAACCTTGGTGGTTATAGTTACTTCCCTACACCAAGTGGTTCTGTAGCTTCTAGTGATA  
>HPV60\_Gamma\_9628566\_nt6271\_L1\_Tile|1  
TGGTTATAGTTACTTCCCTACACCAAGTGGTTCTGTAGCTTCTAGTGATAATCAACTTTT  
>HPV60\_Gamma\_9628566\_nt6276\_L1\_Tile|1  
ATAGTTACTTCCCTACACCAAGTGGTTCTGTAGCTTCTAGTGATAATCAACTTTTTAATA  
>HPV60\_Gamma\_9628566\_nt6281\_L1\_Tile|1  
TACTTCCCTACACCAAGTGGTTCTGTAGCTTCTAGTGATAATCAACTTTTTAATAGACCT  
>HPV60\_Gamma\_9628566\_nt6286\_L1\_Tile|1  
CCCTACACCAAGTGGTTCTGTAGCTTCTAGTGATAATCAACTTTTTAATAGACCTTATTG  
>HPV60\_Gamma\_9628566\_nt6306\_L1\_Tile|1  
TAGCTTCTAGTGATAATCAACTTTTTAATAGACCTTATTGGCTTCACAGAGCCCAAGGTG  
>HPV60\_Gamma\_9628566\_nt6376\_L1\_Tile|1  
TATTTGTTGGGGTAACCAATTATTCATTACTATAGTAGATAATACTCGAAATACTAATTT  
>HPV60\_Gamma\_9628566\_nt6381\_L1\_Tile|1  
GTTGGGGTAACCAATTATTCATTACTATAGTAGATAATACTCGAAATACTAATTTATCTA

>HPV60\_Gamma\_9628566\_nt6386\_L1\_Tile|1  
GGTAACCAATTATTCTATTACTATAGTAGATAAATACTCGAAATACTAATTTATCTATTTCA  
>HPV60\_Gamma\_9628566\_nt6391\_L1\_Tile|1  
CCAATTATTCTATTACTATAGTAGATAAATACTCGAAATACTAATTTATCTATTTTCAGTTTA  
>HPV60\_Gamma\_9628566\_nt6401\_L1\_Tile|1  
ATTACTATAGTAGATAAATACTCGAAATACTAATTTATCTATTTTCAGTTTACAAACAAGAT  
>HPV60\_Gamma\_9628566\_nt6406\_L1\_Tile|1  
TATAGTAGATAAATACTCGAAATACTAATTTATCTATTTTCAGTTTACAAACAAGATGCTGC  
>HPV60\_Gamma\_9628566\_nt6411\_L1\_Tile|1  
TAGATAAATACTCGAAATACTAATTTATCTATTTTCAGTTTACAAACAAGATGCTGCTATTG  
>HPV60\_Gamma\_9628566\_nt6416\_L1\_Tile|1  
AATACTCGAAATACTAATTTATCTATTTTCAGTTTACAAACAAGATGCTGCTATTGATAAC  
>HPV60\_Gamma\_9628566\_nt6421\_L1\_Tile|1  
TCGAAATACTAATTTATCTATTTTCAGTTTACAAACAAGATGCTGCTATTGATAACAGATA  
>HPV60\_Gamma\_9628566\_nt6426\_L1\_Tile|1  
ATACTAATTTATCTATTTTCAGTTTACAAACAAGATGCTGCTATTGATAACAGATATAAAT  
>HPV60\_Gamma\_9628566\_nt6431\_L1\_Tile|1  
AATTTATCTATTTTCAGTTTACAAACAAGATGCTGCTATTGATAACAGATATAAATATAAA  
>HPV60\_Gamma\_9628566\_nt6476\_L1\_Tile|1  
AGATATAAATATAAACAGGAAGATTTTAGACAGTATTTACGCCATACTGAAGAATATGAA  
>HPV60\_Gamma\_9628566\_nt6481\_L1\_Tile|1  
TAAATATAAACAGGAAGATTTTAGACAGTATTTACGCCATACTGAAGAATATGAAGTAGA  
>HPV60\_Gamma\_9628566\_nt6486\_L1\_Tile|1  
ATAAACAGGAAGATTTTAGACAGTATTTACGCCATACTGAAGAATATGAAGTAGAGTTAA  
>HPV60\_Gamma\_9628566\_nt6491\_L1\_Tile|1  
CAGGAAGATTTTAGACAGTATTTACGCCATACTGAAGAATATGAAGTAGAGTTAATTCTG  
>HPV60\_Gamma\_9628566\_nt6496\_L1\_Tile|1  
AGATTTTAGACAGTATTTACGCCATACTGAAGAATATGAAGTAGAGTTAATTCTGAGACT  
>HPV60\_Gamma\_9628566\_nt6506\_L1\_Tile|1  
CAGTATTTACGCCATACTGAAGAATATGAAGTAGAGTTAATTCTGAGACTCTGTAAAGTG  
>HPV60\_Gamma\_9628566\_nt6511\_L1\_Tile|1  
TTTACGCCATACTGAAGAATATGAAGTAGAGTTAATTCTGAGACTCTGTAAAGTGCCTTT  
>HPV60\_Gamma\_9628566\_nt6516\_L1\_Tile|1  
GCCATACTGAAGAATATGAAGTAGAGTTAATTCTGAGACTCTGTAAAGTGCCTTTGAATC  
>HPV60\_Gamma\_9628566\_nt6521\_L1\_Tile|1  
ACTGAAGAATATGAAGTAGAGTTAATTCTGAGACTCTGTAAAGTGCCTTTGAATCCAGAT  
>HPV60\_Gamma\_9628566\_nt6526\_L1\_Tile|1  
AGAATATGAAGTAGAGTTAATTCTGAGACTCTGTAAAGTGCCTTTGAATCCAGATGTTCT  
>HPV60\_Gamma\_9628566\_nt6531\_L1\_Tile|1  
ATGAAGTAGAGTTAATTCTGAGACTCTGTAAAGTGCCTTTGAATCCAGATGTTCTAGCTC  
>HPV60\_Gamma\_9628566\_nt6536\_L1\_Tile|1  
GTAGAGTTAATTCTGAGACTCTGTAAAGTGCCTTTGAATCCAGATGTTCTAGCTCATTTA  
>HPV60\_Gamma\_9628566\_nt6541\_L1\_Tile|1  
GTTAATTCTGAGACTCTGTAAAGTGCCTTTGAATCCAGATGTTCTAGCTCATTTAAATGT  
>HPV60\_Gamma\_9628566\_nt6631\_L1\_Tile|1  
ACTTTCATTTGTACCTCCACCACCACAAGGTATTGAAGATGCTTACAGATATATAATGTC  
>HPV60\_Gamma\_9628566\_nt6641\_L1\_Tile|1  
GTACCTCCACCACCACAAGGTATTGAAGATGCTTACAGATATATAATGTCTCAGGCAACA  
>HPV60\_Gamma\_9628566\_nt6666\_L1\_Tile|1  
AAGATGCTTACAGATATATAATGTCTCAGGCAACAATGTGTCCAACAGATGTTCCCTAATA  
>HPV60\_Gamma\_9628566\_nt6671\_L1\_Tile|1  
GCTTACAGATATATAATGTCTCAGGCAACAATGTGTCCAACAGATGTTCCCTAATACTGAA  
>HPV60\_Gamma\_9628566\_nt6676\_L1\_Tile|1  
CAGATATATAATGTCTCAGGCAACAATGTGTCCAACAGATGTTCCCTAATACTGAAAGGGA  
>HPV60\_Gamma\_9628566\_nt6691\_L1\_Tile|1

TCAGGCAACAATGTGTCCAACAGATGTTCTAATACTGAAAGGGAAGACCCTTATAAACA  
>HPV60\_Gamma\_9628566\_nt6696\_L1\_Tile|1  
CAACAATGTGTCCAACAGATGTTCTAATACTGAAAGGGAAGACCCTTATAAACAGTATA  
>HPV60\_Gamma\_9628566\_nt6726\_L1\_Tile|1  
CTGAAAGGGAAGACCCTTATAAACAGTATACATTTTGGACAATAGATTTGCAAGAACGTT  
>HPV60\_Gamma\_9628566\_nt6741\_L1\_Tile|1  
CTTATAAACAGTATACATTTTGGACAATAGATTTGCAAGAACGTTTTTCTAACGAATTAT  
>HPV60\_Gamma\_9628566\_nt6746\_L1\_Tile|1  
AAACAGTATACATTTTGGACAATAGATTTGCAAGAACGTTTTTCTAACGAATTATCCCAG  
>HPV60\_Gamma\_9628566\_nt6751\_L1\_Tile|1  
GTATACATTTTGGACAATAGATTTGCAAGAACGTTTTTCTAACGAATTATCCCAGTTTTT  
>HPV60\_Gamma\_9628566\_nt6756\_L1\_Tile|1  
CATTTTGGACAATAGATTTGCAAGAACGTTTTTCTAACGAATTATCCCAGTTTTCTCTTG  
>HPV60\_Gamma\_9628566\_nt6761\_L1\_Tile|1  
TGGACAATAGATTTGCAAGAACGTTTTTCTAACGAATTATCCCAGTTTTCTCTTGGAAAA  
>HPV60\_Gamma\_9628566\_nt6811\_L1\_Tile|1  
TCTTGGAAAAAGATATTTATATCAGTATGGCTTACTTAACGGACGAAAACGGTCTGCTAG  
>HPV60\_Gamma\_9628566\_nt6816\_L1\_Tile|1  
GAAAAGATATTTATATCAGTATGGCTTACTTAACGGACGAAAACGGTCTGCTAGTAGTT  
>HPV60\_Gamma\_9628566\_nt6821\_L1\_Tile|1  
AGATATTTATATCAGTATGGCTTACTTAACGGACGAAAACGGTCTGCTAGTAGTTTTGTA  
>HPV60\_Gamma\_9628566\_nt6826\_L1\_Tile|1  
TTTATATCAGTATGGCTTACTTAACGGACGAAAACGGTCTGCTAGTAGTTTTGTAACGAA  
>HPV60\_Gamma\_9628566\_nt6831\_L1\_Tile|1  
ATCAGTATGGCTTACTTAACGGACGAAAACGGTCTGCTAGTAGTTTTGTAACGAAGAAAT  
>HPV60\_Gamma\_9628566\_nt6836\_L1\_Tile|1  
TATGGCTTACTTAACGGACGAAAACGGTCTGCTAGTAGTTTTGTAACGAAGAAATCAAAA  
>HPV60\_Gamma\_9628566\_nt6841\_L1\_Tile|1  
CTTACTTAACGGACGAAAACGGTCTGCTAGTAGTTTTGTAACGAAGAAATCAAAAACGTG  
>HPV60\_Gamma\_9628566\_nt6846\_L1\_Tile|1  
TTAACGGACGAAAACGGTCTGCTAGTAGTTTTGTAACGAAGAAATCAAAAACGTGAAAC  
>HPV60\_Gamma\_9628566\_nt6851\_L1\_Tile|1  
GGACGAAAACGGTCTGCTAGTAGTTTTGTAACGAAGAAATCAAAAACGTGAAACGTAA  
>HPV60\_Gamma\_9628566\_nt6861\_L1\_Tile|1  
GGTCTGCTAGTAGTTTTGTAACGAAGAAATCAAAAACGTGAAACGTAAAGAACTAAAT  
>HPV60\_Gamma\_9628566\_nt6863\_L1\_Tile|1  
TCTGCTAGTAGTTTTGTAACGAAGAAATCAAAAACGTGAAACGTAAAGAACTAAATAA  
>HPV61\_Alpha\_9628574\_nt5880\_L1\_Tile|1  
GTTCCCGTCTGCTTACTGTAGGACATCCCTATTGTAGTTTGCAGCTTGATGGGCTGCAGG  
>HPV61\_Alpha\_9628574\_nt5890\_L1\_Tile|1  
GCTTACTGTAGGACATCCCTATTGTAGTTTGCAGCTTGATGGGCTGCAGGGCAAGAAAAA  
>HPV61\_Alpha\_9628574\_nt5895\_L1\_Tile|1  
CTGTAGGACATCCCTATTGTAGTTTGCAGCTTGATGGGCTGCAGGGCAAGAAAAACACTA  
>HPV61\_Alpha\_9628574\_nt5900\_L1\_Tile|1  
GGACATCCCTATTGTAGTTTGCAGCTTGATGGGCTGCAGGGCAAGAAAAACACTATCCCC  
>HPV61\_Alpha\_9628574\_nt5910\_L1\_Tile|1  
ATTGTAGTTTGCAGCTTGATGGGCTGCAGGGCAAGAAAAACACTATCCCCAAGGTGTCTG  
>HPV61\_Alpha\_9628574\_nt6195\_L1\_Tile|1  
GTCGTGACAATGTGTCTGTTGATTATAAGCAGACCCAGCTACTTATTGTAGTTGCAAAC  
>HPV61\_Alpha\_9628574\_nt6285\_L1\_Tile|1  
CTGCTTGTGCTAACCCCGCGCCCCGCCCCACTGACTGTCCTCCATTGGAATTTACAAATA  
>HPV61\_Alpha\_9628574\_nt6550\_L1\_Tile|1  
CAATCGCCAGGGTGTGATGGGTGAGGCACTGCCTGACTCTTATTATCTTAAGGGTGCGAA  
>HPV61\_Alpha\_9628574\_nt6585\_L1\_Tile|1  
ACTCTTATTATCTTAAGGGTGCGAATGACAAGGCGCCCCCTGGTAGTTATATTTATTC



>HPV61\_Alpha\_9628574\_nt6780\_L1\_Tile|1  
GCAGTACTAATTTAACCATTTGTACTGCTACATCCCCCCTGTATCTGAATATAAAGCCA  
>HPV61\_Alpha\_9628574\_nt6785\_L1\_Tile|1  
ACTAATTTAACCATTTGTACTGCTACATCCCCCCTGTATCTGAATATAAAGCCACAAGC  
>HPV61\_Alpha\_9628574\_nt6790\_L1\_Tile|1  
TTTAACCATTTGTACTGCTACATCCCCCCTGTATCTGAATATAAAGCCACAAGCTTTAG  
>HPV61\_Alpha\_9628574\_nt6795\_L1\_Tile|1  
CCATTTGTACTGCTACATCCCCCCTGTATCTGAATATAAAGCCACAAGCTTTAGGGAAT  
>HPV61\_Alpha\_9628574\_nt6800\_L1\_Tile|1  
TGTACTGCTACATCCCCCCTGTATCTGAATATAAAGCCACAAGCTTTAGGGAATATTTG  
>HPV61\_Alpha\_9628574\_nt6805\_L1\_Tile|1  
TGCTACATCCCCCCTGTATCTGAATATAAAGCCACAAGCTTTAGGGAATATTTGCGCCA  
>HPV61\_Alpha\_9628574\_nt6810\_L1\_Tile|1  
CATCCCCCCTGTATCTGAATATAAAGCCACAAGCTTTAGGGAATATTTGCGCCATACAG  
>HPV61\_Alpha\_9628574\_nt6820\_L1\_Tile|1  
TGTATCTGAATATAAAGCCACAAGCTTTAGGGAATATTTGCGCCATACAGAGGAGTTTGA  
>HPV61\_Alpha\_9628574\_nt6985\_L1\_Tile|1  
GGTACCACCACCTCTACCAGTTTAGAAGACACATATAGGTTTTTGCAGTCCAGAGCTAT  
>HPVcand62\_Alpha\_39932599\_nt6163\_L1\_Tile|1  
CAGAAAATACCTCTTTGTTGGCTGCTGCTAATGATGACAGTCGGGACAATATCTCTGTGG  
>HPVcand62\_Alpha\_39932599\_nt6168\_L1\_Tile|1  
AATACCTCTTTGTTGGCTGCTGCTAATGATGACAGTCGGGACAATATCTCTGTGGATTAT  
>HPVcand62\_Alpha\_39932599\_nt6238\_L1\_Tile|1  
AGTTGTTAATTGTGGGGTGTAAAGCCCCCTATAGGAGAGCACTGGACCAAAGGTACCTTAT  
>HPVcand62\_Alpha\_39932599\_nt6243\_L1\_Tile|1  
TTAATTGTGGGGTGTAAAGCCCCCTATAGGAGAGCACTGGACCAAAGGTACCTTATGCCCC  
>HPVcand62\_Alpha\_39932599\_nt6248\_L1\_Tile|1  
TGTGGGGTGTAAAGCCCCCTATAGGAGAGCACTGGACCAAAGGTACCTTATGCCCCAATGC  
>HPVcand62\_Alpha\_39932599\_nt6253\_L1\_Tile|1  
GGTGTAAAGCCCCCTATAGGAGAGCACTGGACCAAAGGTACCTTATGCCCCAATGCTGCCC  
>HPVcand62\_Alpha\_39932599\_nt6588\_L1\_Tile|1  
CCCCTGACCTGTATATGAAAGGTACCCCAGGCAGTGACAGACAAATGCCGGGCAGTTAC  
>HPVcand62\_Alpha\_39932599\_nt6593\_L1\_Tile|1  
TGACCTGTATATGAAAGGTACCCCAGGCAGTGACAGACAAATGCCGGGCAGTTACATTTA  
>HPVcand62\_Alpha\_39932599\_nt6603\_L1\_Tile|1  
ATGAAAGGTACCCCAGGCAGTGACAGACAAATGCCGGGCAGTTACATTTATGCCCCACT  
>HPVcand62\_Alpha\_39932599\_nt7073\_L1\_Tile|1  
TGCTTCCCCGTCCCCAAGGTGGACCCGTATGCGCAAATGACATTTTGGACTGTGGATCT  
>HPVcand62\_Alpha\_39932599\_nt7230\_L1\_Tile|1  
AAGCGTTCTGCACCTACTAAGCAGTCCCCTACCTCTGCTAAACGAAAGCGCAGGAAGTAA  
>HPV63\_Mu\_9626605\_nt5372\_L1\_Tile|1  
ATGGCTGTTTGGCTTCCTGCCCAGAATAAGTTTTACCTTCCTACCCAACCGATCACCAAG  
>HPV63\_Mu\_9626605\_nt5377\_L1\_Tile|1  
TGTTTGGCTTCCTGCCCAGAATAAGTTTTACCTTCCTACCCAACCGATCACCAAGATTCT  
>HPV63\_Mu\_9626605\_nt5392\_L1\_Tile|1  
CCAGAATAAGTTTTACCTTCCTACCCAACCGATCACCAAGATTCTAAGCAGCGATGATTA  
>HPV63\_Mu\_9626605\_nt5397\_L1\_Tile|1  
ATAAGTTTTACCTTCCTACCCAACCGATCACCAAGATTCTAAGCAGCGATGATTATGTGT  
>HPV63\_Mu\_9626605\_nt5407\_L1\_Tile|1  
CCTTCCTACCCAACCGATCACCAAGATTCTAAGCAGCGATGATTATGTGTCTCGCACCAA  
>HPV63\_Mu\_9626605\_nt5412\_L1\_Tile|1  
CTACCCAACCGATCACCAAGATTCTAAGCAGCGATGATTATGTGTCTCGCACCAACATCT  
>HPV63\_Mu\_9626605\_nt5417\_L1\_Tile|1  
CAACCGATCACCAAGATTCTAAGCAGCGATGATTATGTGTCTCGCACCAACATCTTCTAT  
>HPV63\_Mu\_9626605\_nt5422\_L1\_Tile|2

GATCACCAAGATTCTAAGCAGCGATGATTATGTGTCTCGCACCAACATCTTCTATCACGC  
>HPV63\_Mu\_9626605\_nt5427\_L1\_Tile|1  
CCAAGATTCTAAGCAGCGATGATTATGTGTCTCGCACCAACATCTTCTATCACGCTACCA  
>HPV63\_Mu\_9626605\_nt5442\_L1\_Tile|2  
GCGATGATTATGTGTCTCGCACCAACATCTTCTATCACGCTACCAGTGATCGACTGCTCA  
>HPV63\_Mu\_9626605\_nt5447\_L1\_Tile|1  
GATTATGTGTCTCGCACCAACATCTTCTATCACGCTACCAGTGATCGACTGCTCATTGTG  
>HPV63\_Mu\_9626605\_nt5462\_L1\_Tile|2  
ACCAACATCTTCTATCACGCTACCAGTGATCGACTGCTCATTGTGGGACACCCGCTCTAT  
>HPV63\_Mu\_9626605\_nt5467\_L1\_Tile|1  
CATCTTCTATCACGCTACCAGTGATCGACTGCTCATTGTGGGACACCCGCTCTATGAGGT  
>HPV63\_Mu\_9626605\_nt5472\_L1\_Tile|1  
TCTATCACGCTACCAGTGATCGACTGCTCATTGTGGGACACCCGCTCTATGAGGTTACCC  
>HPV63\_Mu\_9626605\_nt5487\_L1\_Tile|1  
GTGATCGACTGCTCATTGTGGGACACCCGCTCTATGAGGTTACCCGTGCAAATGATAACA  
>HPV63\_Mu\_9626605\_nt5492\_L1\_Tile|1  
CGACTGCTCATTGTGGGACACCCGCTCTATGAGGTTACCCGTGCAAATGATAACACTATG  
>HPV63\_Mu\_9626605\_nt5497\_L1\_Tile|1  
GCTCATTGTGGGACACCCGCTCTATGAGGTTACCCGTGCAAATGATAACACTATGACTGT  
>HPV63\_Mu\_9626605\_nt5512\_L1\_Tile|1  
CCCGCTCTATGAGGTTACCCGTGCAAATGATAACACTATGACTGTGCCTAAAGTTTCTCC  
>HPV63\_Mu\_9626605\_nt5517\_L1\_Tile|1  
TCTATGAGGTTACCCGTGCAAATGATAACACTATGACTGTGCCTAAAGTTTCTCCAAATC  
>HPV63\_Mu\_9626605\_nt5522\_L1\_Tile|2  
GAGGTTACCCGTGCAAATGATAACACTATGACTGTGCCTAAAGTTTCTCCAAATCAGTAT  
>HPV63\_Mu\_9626605\_nt5532\_L1\_Tile|1  
GTGCAAATGATAACACTATGACTGTGCCTAAAGTTTCTCCAAATCAGTATAGAGTCTTTC  
>HPV63\_Mu\_9626605\_nt5537\_L1\_Tile|1  
AATGATAACACTATGACTGTGCCTAAAGTTTCTCCAAATCAGTATAGAGTCTTTCGTGTT  
>HPV63\_Mu\_9626605\_nt5542\_L1\_Tile|2  
TAACACTATGACTGTGCCTAAAGTTTCTCCAAATCAGTATAGAGTCTTTCGTGTTAGATT  
>HPV63\_Mu\_9626605\_nt5547\_L1\_Tile|1  
CTATGACTGTGCCTAAAGTTTCTCCAAATCAGTATAGAGTCTTTCGTGTTAGATTTCAG  
>HPV63\_Mu\_9626605\_nt5577\_L1\_Tile|1  
AGTATAGAGTCTTTCGTGTTAGATTTCAGATCCTAACCGATTTGCCTTTGGAGATAAGG  
>HPV63\_Mu\_9626605\_nt5582\_L1\_Tile|2  
AGAGTCTTTCGTGTTAGATTTCAGATCCTAACCGATTTGCCTTTGGAGATAAGGATATT  
>HPV63\_Mu\_9626605\_nt5622\_L1\_Tile|2  
CCTTTGGAGATAAGGATATTTTTGACCCAGAAACTGAGAGACTAGTTTGGGGTCTTAGAG  
>HPV63\_Mu\_9626605\_nt5627\_L1\_Tile|1  
GGAGATAAGGATATTTTTGACCCAGAAACTGAGAGACTAGTTTGGGGTCTTAGAGGCATA  
>HPV63\_Mu\_9626605\_nt5632\_L1\_Tile|1  
TAAGGATATTTTTGACCCAGAAACTGAGAGACTAGTTTGGGGTCTTAGAGGCATAGAAAT  
>HPV63\_Mu\_9626605\_nt5637\_L1\_Tile|1  
ATATTTTTGACCCAGAAACTGAGAGACTAGTTTGGGGTCTTAGAGGCATAGAAATCGGTA  
>HPV63\_Mu\_9626605\_nt5712\_L1\_Tile|1  
GTGTGGGTATTTTCAGGCAATCCATTATTAAATAGGTTTGATGATGCTGAAAATCCTAGCA  
>HPV63\_Mu\_9626605\_nt5722\_L1\_Tile|2  
TTCAGGCAATCCATTATTAAATAGGTTTGATGATGCTGAAAATCCTAGCAGATATAATAA  
>HPV63\_Mu\_9626605\_nt5727\_L1\_Tile|1  
GCAATCCATTATTAAATAGGTTTGATGATGCTGAAAATCCTAGCAGATATAATAATACAC  
>HPV63\_Mu\_9626605\_nt5732\_L1\_Tile|1  
CCATTATTAAATAGGTTTGATGATGCTGAAAATCCTAGCAGATATAATAATACACATGCA  
>HPV63\_Mu\_9626605\_nt5742\_L1\_Tile|2  
ATAGGTTTGATGATGCTGAAAATCCTAGCAGATATAATAATACACATGCAACTGGTGATA

>HPV63\_Mu\_9626605\_nt5747\_L1\_Tile|1  
TTTGATGATGCTGAAAATCCTAGCAGATATAATAATACACATGCAACTGGTGATAATAGG  
>HPV63\_Mu\_9626605\_nt5757\_L1\_Tile|1  
CTGAAAATCCTAGCAGATATAATAATACACATGCAACTGGTGATAATAGGCAAAATGTTG  
>HPV63\_Mu\_9626605\_nt5762\_L1\_Tile|2  
AATCCTAGCAGATATAATAATACACATGCAACTGGTGATAATAGGCAAAATGTTGCTTTT  
>HPV63\_Mu\_9626605\_nt5792\_L1\_Tile|1  
ACTGGTGATAATAGGCAAAATGTTGCTTTTGGATGCAAAACAAACCCAAATGTTTCTAATT  
>HPV63\_Mu\_9626605\_nt5852\_L1\_Tile|1  
GGCTGTACACCAGCCACTGGGGAACACTGGTCAATAGCTCGACGCTGTGCAGGAACACAG  
>HPV63\_Mu\_9626605\_nt5857\_L1\_Tile|1  
TACACCAGCCACTGGGGAACACTGGTCAATAGCTCGACGCTGTGCAGGAACACAGTTTCA  
>HPV63\_Mu\_9626605\_nt5872\_L1\_Tile|1  
GGAACACTGGTCAATAGCTCGACGCTGTGCAGGAACACAGTTTCAGCTTGGAGATTGTCC  
>HPV63\_Mu\_9626605\_nt5877\_L1\_Tile|1  
ACTGGTCAATAGCTCGACGCTGTGCAGGAACACAGTTTCAGCTTGGAGATTGTCCTCCTA  
>HPV63\_Mu\_9626605\_nt5967\_L1\_Tile|1  
GTGATATGTTTGACATAGGTCTAGGTGCTATGGACTTTGGTTCTTTGCAAGCAAACAAAG  
>HPV63\_Mu\_9626605\_nt5972\_L1\_Tile|1  
ATGTTTGACATAGGTCTAGGTGCTATGGACTTTGGTTCTTTGCAAGCAAACAAAGCAGAT  
>HPV63\_Mu\_9626605\_nt5977\_L1\_Tile|1  
TGACATAGGTCTAGGTGCTATGGACTTTGGTTCTTTGCAAGCAAACAAAGCAGATGCTCC  
>HPV63\_Mu\_9626605\_nt5982\_L1\_Tile|2  
TAGGTCTAGGTGCTATGGACTTTGGTTCTTTGCAAGCAAACAAAGCAGATGCTCCTTTGG  
>HPV63\_Mu\_9626605\_nt5992\_L1\_Tile|1  
TGCTATGGACTTTGGTTCTTTGCAAGCAAACAAAGCAGATGCTCCTTTGGATATTGCAGG  
>HPV63\_Mu\_9626605\_nt5997\_L1\_Tile|1  
TGGACTTTGGTTCTTTGCAAGCAAACAAAGCAGATGCTCCTTTGGATATTGCAGGCACTG  
>HPV63\_Mu\_9626605\_nt6002\_L1\_Tile|2  
TTTGGTTCTTTGCAAGCAAACAAAGCAGATGCTCCTTTGGATATTGCAGGCACTGTCTGC  
>HPV63\_Mu\_9626605\_nt6072\_L1\_Tile|1  
ATTATATTAAAATGGGACAGGAAGTACATGGTAATTCTCTGTTTTTCTTTGCTCGCAGAG  
>HPV63\_Mu\_9626605\_nt6077\_L1\_Tile|1  
ATTTAAAATGGGACAGGAAGTACATGGTAATTCTCTGTTTTTCTTTGCTCGCAGAGAACAA  
>HPV63\_Mu\_9626605\_nt6082\_L1\_Tile|2  
AATGGGACAGGAAGTACATGGTAATTCTCTGTTTTTCTTTGCTCGCAGAGAACAAATGTA  
>HPV63\_Mu\_9626605\_nt6087\_L1\_Tile|1  
GACAGGAAGTACATGGTAATTCTCTGTTTTTCTTTGCTCGCAGAGAACAAATGTATTTAA  
>HPV63\_Mu\_9626605\_nt6112\_L1\_Tile|1  
GTTTTTCTTTGCTCGCAGAGAACAAATGTATTTAAGGCATGTATTTACACATGCTGGAAT  
>HPV63\_Mu\_9626605\_nt6117\_L1\_Tile|1  
TCTTTGCTCGCAGAGAACAAATGTATTTAAGGCATGTATTTACACATGCTGGAATTGTTA  
>HPV63\_Mu\_9626605\_nt6122\_L1\_Tile|2  
GCTCGCAGAGAACAAATGTATTTAAGGCATGTATTTACACATGCTGGAATTGTTAGTGAA  
>HPV63\_Mu\_9626605\_nt6127\_L1\_Tile|1  
CAGAGAACAAATGTATTTAAGGCATGTATTTACACATGCTGGAATTGTTAGTGAAAAAGA  
>HPV63\_Mu\_9626605\_nt6132\_L1\_Tile|1  
AACAAATGTATTTAAGGCATGTATTTACACATGCTGGAATTGTTAGTGAAAAAGAGAAAG  
>HPV63\_Mu\_9626605\_nt6137\_L1\_Tile|1  
ATGTATTTAAGGCATGTATTTACACATGCTGGAATTGTTAGTGAAAAAGAGAAAGTCCCT  
>HPV63\_Mu\_9626605\_nt6142\_L1\_Tile|2  
TTTAAGGCATGTATTTACACATGCTGGAATTGTTAGTGAAAAAGAGAAAGTCCCTACCAG  
>HPV63\_Mu\_9626605\_nt6147\_L1\_Tile|1  
GGCATGTATTTACACATGCTGGAATTGTTAGTGAAAAAGAGAAAGTCCCTACCAGTGCAT  
>HPV63\_Mu\_9626605\_nt6152\_L1\_Tile|1

GTATTTACACATGCTGGAATTGTTAGTGAAAAAGAGAAAGTCCCTACCAGTGCATATATT  
>HPV63\_Mu\_9626605\_nt6157\_L1\_Tile|1  
TACACATGCTGGAATTGTTAGTGAAAAAGAGAAAGTCCCTACCAGTGCATATATTGCTGC  
>HPV63\_Mu\_9626605\_nt6167\_L1\_Tile|1  
GGAATTGTTAGTGAAAAAGAGAAAGTCCCTACCAGTGCATATATTGCTGCTAAAGCCGAG  
>HPV63\_Mu\_9626605\_nt6172\_L1\_Tile|1  
TGTTAGTGAAAAAGAGAAAGTCCCTACCAGTGCATATATTGCTGCTAAAGCCGAGCAACC  
>HPV63\_Mu\_9626605\_nt6182\_L1\_Tile|2  
AAAGAGAAAGTCCCTACCAGTGCATATATTGCTGCTAAAGCCGAGCAACCCCAAAATACT  
>HPV63\_Mu\_9626605\_nt6187\_L1\_Tile|1  
GAAAGTCCCTACCAGTGCATATATTGCTGCTAAAGCCGAGCAACCCCAAAATACTATTGC  
>HPV63\_Mu\_9626605\_nt6192\_L1\_Tile|1  
TCCCTACCAGTGCATATATTGCTGCTAAAGCCGAGCAACCCCAAAATACTATTGCTACAG  
>HPV63\_Mu\_9626605\_nt6202\_L1\_Tile|2  
TGCATATATTGCTGCTAAAGCCGAGCAACCCCAAAATACTATTGCTACAGATAATTATTT  
>HPV63\_Mu\_9626605\_nt6212\_L1\_Tile|1  
GCTGCTAAAGCCGAGCAACCCCAAAATACTATTGCTACAGATAATTATTTTGTAGCTCCC  
>HPV63\_Mu\_9626605\_nt6217\_L1\_Tile|1  
TAAAGCCGAGCAACCCCAAAATACTATTGCTACAGATAATTATTTTGTAGCTCCCAGTGG  
>HPV63\_Mu\_9626605\_nt6222\_L1\_Tile|2  
CCGAGCAACCCCAAAATACTATTGCTACAGATAATTATTTTGTAGCTCCCAGTGGATCTT  
>HPV63\_Mu\_9626605\_nt6227\_L1\_Tile|1  
CAACCCCAAAATACTATTGCTACAGATAATTATTTTGTAGCTCCCAGTGGATCTTTAGTG  
>HPV63\_Mu\_9626605\_nt6237\_L1\_Tile|1  
ATACTATTGCTACAGATAATTATTTTGTAGCTCCCAGTGGATCTTTAGTGTCTCTGATG  
>HPV63\_Mu\_9626605\_nt6242\_L1\_Tile|2  
ATTGCTACAGATAATTATTTTGTAGCTCCCAGTGGATCTTTAGTGTCTCTGATGTGCAA  
>HPV63\_Mu\_9626605\_nt6247\_L1\_Tile|1  
TACAGATAATTATTTTGTAGCTCCCAGTGGATCTTTAGTGTCTCTGATGTGCAAATTTT  
>HPV63\_Mu\_9626605\_nt6252\_L1\_Tile|1  
ATAATTATTTTGTAGCTCCCAGTGGATCTTTAGTGTCTCTGATGTGCAAATTTTAAATA  
>HPV63\_Mu\_9626605\_nt6257\_L1\_Tile|1  
TATTTTGTAGCTCCCAGTGGATCTTTAGTGTCTCTGATGTGCAAATTTTAAATAGGCCC  
>HPV63\_Mu\_9626605\_nt6282\_L1\_Tile|2  
TAGTGTCTCTGATGTGCAAATTTTAAATAGGCCCTATTGGTTACAACGTTCTCAAGGAC  
>HPV63\_Mu\_9626605\_nt6342\_L1\_Tile|2  
AGAACAATGGTATCTGTTGGAGAAATGAGTTATTTGTAAGTGTAGCTGATAATACCAGAG  
>HPV63\_Mu\_9626605\_nt6352\_L1\_Tile|1  
TATCTGTTGGAGAAATGAGTTATTTGTAAGTGTAGCTGATAATACCAGAGGAACACGAT  
>HPV63\_Mu\_9626605\_nt6362\_L1\_Tile|2  
AGAAATGAGTTATTTGTAAGTGTAGCTGATAATACCAGAGGAACACGATGAATATAAAT  
>HPV63\_Mu\_9626605\_nt6367\_L1\_Tile|1  
TGAGTTATTTGTAAGTGTAGCTGATAATACCAGAGGAACACGATGAATATAAATGTTCT  
>HPV63\_Mu\_9626605\_nt6372\_L1\_Tile|1  
TATTTGTAAGTGTAGCTGATAATACCAGAGGAACACGATGAATATAAATGTTCTTAACA  
>HPV63\_Mu\_9626605\_nt6377\_L1\_Tile|1  
GTAAGTGTAGCTGATAATACCAGAGGAACACGATGAATATAAATGTTCTTAACAAAGCA  
>HPV63\_Mu\_9626605\_nt6387\_L1\_Tile|1  
CTGATAATACCAGAGGAACACGATGAATATAAATGTTCTTAACAAAGCAACCCCTGAGA  
>HPV63\_Mu\_9626605\_nt6392\_L1\_Tile|1  
AATACCAGAGGAACACGATGAATATAAATGTTCTTAACAAAGCAACCCCTGAGACTTAT  
>HPV63\_Mu\_9626605\_nt6402\_L1\_Tile|2  
GAACACGATGAATATAAATGTTCTTAACAAAGCAACCCCTGAGACTTATGATAGCGCAG  
>HPV63\_Mu\_9626605\_nt6407\_L1\_Tile|1  
ACGATGAATATAAATGTTCTTAACAAAGCAACCCCTGAGACTTATGATAGCGCAGATTAT

>HPV63\_Mu\_9626605\_nt6412\_L1\_Tile|1  
GAATATAAATGTTCTTAACAAAGCAACCCCTGAGACTTATGATAGCGCAGATTATAATGA  
>HPV63\_Mu\_9626605\_nt6422\_L1\_Tile|2  
GTTCTTAACAAAGCAACCCCTGAGACTTATGATAGCGCAGATTATAATGAGTATACTCGC  
>HPV63\_Mu\_9626605\_nt6427\_L1\_Tile|1  
TAACAAAGCAACCCCTGAGACTTATGATAGCGCAGATTATAATGAGTATACTCGCCATGT  
>HPV63\_Mu\_9626605\_nt6437\_L1\_Tile|1  
ACCCCTGAGACTTATGATAGCGCAGATTATAATGAGTATACTCGCCATGTGGAGGAATAT  
>HPV63\_Mu\_9626605\_nt6447\_L1\_Tile|1  
CTTATGATAGCGCAGATTATAATGAGTATACTCGCCATGTGGAGGAATATGAGTTATCCT  
>HPV63\_Mu\_9626605\_nt6452\_L1\_Tile|1  
GATAGCGCAGATTATAATGAGTATACTCGCCATGTGGAGGAATATGAGTTATCCTTTATA  
>HPV63\_Mu\_9626605\_nt6457\_L1\_Tile|1  
CGCAGATTATAATGAGTATACTCGCCATGTGGAGGAATATGAGTTATCCTTTATAGTTCA  
>HPV63\_Mu\_9626605\_nt6462\_L1\_Tile|2  
ATTATAATGAGTATACTCGCCATGTGGAGGAATATGAGTTATCCTTTATAGTTCAGCTTT  
>HPV63\_Mu\_9626605\_nt6492\_L1\_Tile|1  
AATATGAGTTATCCTTTATAGTTCAGCTTTGTAAGGTAAACCTGAAAATTTAG  
>HPV63\_Mu\_9626605\_nt6497\_L1\_Tile|1  
GAGTTATCCTTTATAGTTCAGCTTTGTAAGGTAAACCTGAAAATTTAGCATTT  
>HPV63\_Mu\_9626605\_nt6502\_L1\_Tile|2  
ATCCTTTATAGTTCAGCTTTGTAAGGTAAACCTGAAAATTTAGCATTTTTTGCA  
>HPV63\_Mu\_9626605\_nt6537\_L1\_Tile|1  
CACCTGAAAATTTAGCATTTTTTGATAATATGGATCCAACAATTATCGATTCTTGGCAGT  
>HPV63\_Mu\_9626605\_nt6542\_L1\_Tile|2  
GAAAATTTAGCATTTTTTGATAATATGGATCCAACAATTATCGATTCTTGGCAGTTAACA  
>HPV63\_Mu\_9626605\_nt6547\_L1\_Tile|1  
TTTAGCATTTTTTGATAATATGGATCCAACAATTATCGATTCTTGGCAGTTAACAGTTTC  
>HPV63\_Mu\_9626605\_nt6552\_L1\_Tile|1  
CATTTTTTGATAATATGGATCCAACAATTATCGATTCTTGGCAGTTAACAGTTTCTCAAC  
>HPV63\_Mu\_9626605\_nt6562\_L1\_Tile|2  
TAATATGGATCCAACAATTATCGATTCTTGGCAGTTAACAGTTTCTCAACCTCCTGCAAA  
>HPV63\_Mu\_9626605\_nt6572\_L1\_Tile|1  
CCAACAATTATCGATTCTTGGCAGTTAACAGTTTCTCAACCTCCTGCAAATGCTATAGAG  
>HPV63\_Mu\_9626605\_nt6582\_L1\_Tile|2  
TCGATTCTTGGCAGTTAACAGTTTCTCAACCTCCTGCAAATGCTATAGAGGACAAGTATA  
>HPV63\_Mu\_9626605\_nt6587\_L1\_Tile|1  
TCCTGGCAGTTAACAGTTTCTCAACCTCCTGCAAATGCTATAGAGGACAAGTATAGATTT  
>HPV63\_Mu\_9626605\_nt6592\_L1\_Tile|1  
GCAGTTAACAGTTTCTCAACCTCCTGCAAATGCTATAGAGGACAAGTATAGATTTATTGA  
>HPV63\_Mu\_9626605\_nt6597\_L1\_Tile|1  
TAACAGTTTCTCAACCTCCTGCAAATGCTATAGAGGACAAGTATAGATTTATTGAATCAT  
>HPV63\_Mu\_9626605\_nt6607\_L1\_Tile|1  
TCAACCTCCTGCAAATGCTATAGAGGACAAGTATAGATTTATTGAATCATTAGCAACAAA  
>HPV63\_Mu\_9626605\_nt6612\_L1\_Tile|1  
CTCCTGCAAATGCTATAGAGGACAAGTATAGATTTATTGAATCATTAGCAACAAAATGTC  
>HPV63\_Mu\_9626605\_nt6617\_L1\_Tile|1  
GCAAATGCTATAGAGGACAAGTATAGATTTATTGAATCATTAGCAACAAAATGTCCTGAT  
>HPV63\_Mu\_9626605\_nt6622\_L1\_Tile|2  
TGCTATAGAGGACAAGTATAGATTTATTGAATCATTAGCAACAAAATGTCCTGATAACGT  
>HPV63\_Mu\_9626605\_nt6632\_L1\_Tile|1  
GACAAGTATAGATTTATTGAATCATTAGCAACAAAATGTCCTGATAACGTGCCCCCACC  
>HPV63\_Mu\_9626605\_nt6637\_L1\_Tile|1  
GTATAGATTTATTGAATCATTAGCAACAAAATGTCCTGATAACGTGCCCCCACCCTCC  
>HPV63\_Mu\_9626605\_nt6657\_L1\_Tile|1

TAGCAACAAAATGTCCTGATAACGTGCCCCACCCACTCCTACTGATCCTTACAAAGATT  
>HPV63\_Mu\_9626605\_nt6662\_L1\_Tile|2  
ACAAAATGTCCTGATAACGTGCCCCACCCACTCCTACTGATCCTTACAAAGATTTACGT  
>HPV63\_Mu\_9626605\_nt6672\_L1\_Tile|1  
CTGATAACGTGCCCCACCCACTCCTACTGATCCTTACAAAGATTTACGTTTTTGGGATG  
>HPV63\_Mu\_9626605\_nt6677\_L1\_Tile|1  
AACGTGCCCCACCCACTCCTACTGATCCTTACAAAGATTTACGTTTTTGGGATGTAGAC  
>HPV63\_Mu\_9626605\_nt6682\_L1\_Tile|2  
GCCCCACCCACTCCTACTGATCCTTACAAAGATTTACGTTTTTGGGATGTAGACCTCAG  
>HPV63\_Mu\_9626605\_nt6687\_L1\_Tile|1  
CACCCACTCCTACTGATCCTTACAAAGATTTACGTTTTTGGGATGTAGACCTCAGTGAGC  
>HPV63\_Mu\_9626605\_nt6692\_L1\_Tile|1  
ACTCCTACTGATCCTTACAAAGATTTACGTTTTTGGGATGTAGACCTCAGTGAGCGAATG  
>HPV63\_Mu\_9626605\_nt6697\_L1\_Tile|1  
TACTGATCCTTACAAAGATTTACGTTTTTGGGATGTAGACCTCAGTGAGCGAATGTCGGA  
>HPV63\_Mu\_9626605\_nt6702\_L1\_Tile|2  
ATCCTTACAAAGATTTACGTTTTTGGGATGTAGACCTCAGTGAGCGAATGTCGGAGCAGC  
>HPV63\_Mu\_9626605\_nt6707\_L1\_Tile|1  
TACAAAGATTTACGTTTTTGGGATGTAGACCTCAGTGAGCGAATGTCGGAGCAGCTTGAT  
>HPV63\_Mu\_9626605\_nt6712\_L1\_Tile|1  
AGATTTACGTTTTTGGGATGTAGACCTCAGTGAGCGAATGTCGGAGCAGCTTGATCAATT  
>HPV63\_Mu\_9626605\_nt6717\_L1\_Tile|1  
TACGTTTTTGGGATGTAGACCTCAGTGAGCGAATGTCGGAGCAGCTTGATCAATTCCTT  
>HPV63\_Mu\_9626605\_nt6722\_L1\_Tile|2  
TTTTGGGATGTAGACCTCAGTGAGCGAATGTCGGAGCAGCTTGATCAATTCCTTTAGGC  
>HPV63\_Mu\_9626605\_nt6732\_L1\_Tile|1  
TAGACCTCAGTGAGCGAATGTCGGAGCAGCTTGATCAATTCCTTTAGGCCGCAAATTTT  
>HPV63\_Mu\_9626605\_nt6737\_L1\_Tile|1  
CTCAGTGAGCGAATGTCGGAGCAGCTTGATCAATTCCTTTAGGCCGCAAATTTTTGTAT  
>HPV63\_Mu\_9626605\_nt6742\_L1\_Tile|2  
TGAGCGAATGTCGGAGCAGCTTGATCAATTCCTTTAGGCCGCAAATTTTTGTATCAAAG  
>HPV63\_Mu\_9626605\_nt6782\_L1\_Tile|2  
CGCAAATTTTTGTATCAAAGTGGTCTTGCACAGCGTTCTGTTCCAAAACTGTGAATTTT  
>HPV63\_Mu\_9626605\_nt6787\_L1\_Tile|1  
ATTTTTGTATCAAAGTGGTCTTGCACAGCGTTCTGTTCCAAAACTGTGAATTTTCAAGAA  
>HPV63\_Mu\_9626605\_nt6792\_L1\_Tile|1  
TGTATCAAAGTGGTCTTGCACAGCGTTCTGTTCCAAAACTGTGAATTTTCAAGAAACGTA  
>HPV63\_Mu\_9626605\_nt6797\_L1\_Tile|1  
CAAAGTGGTCTTGCACAGCGTTCTGTTCCAAAACTGTGAATTTTCAAGAAACGTAGATCC  
>HPV63\_Mu\_9626605\_nt6802\_L1\_Tile|2  
TGGTCTTGCACAGCGTTCTGTTCCAAAACTGTGAATTTTCAAGAAACGTAGATCCTCCAA  
>HPV63\_Mu\_9626605\_nt6807\_L1\_Tile|1  
TTGCACAGCGTTCTGTTCCAAAACTGTGAATTTTCAAGAAACGTAGATCCTCCAATACTA  
>HPV63\_Mu\_9626605\_nt6832\_L1\_Tile|1  
TGTGAATTTTCAAGAAACGTAGATCCTCCAATACTACTGTGGCCAAACGGAGGCGACGGGC  
>HPV63\_Mu\_9626605\_nt6836\_L1\_Tile|1  
AATTTTCAAGAAACGTAGATCCTCCAATACTACTGTGGCCAAACGGAGGCGACGGGCCTGA  
>HPV65\_Gamma\_312100\_nt5552\_L1\_Tile|1  
AGATTCTATTTACCAGATCCTAATAGGTTTGCATTGATTGATAATGGTTTCTATGATTCT  
>HPV65\_Gamma\_312100\_nt5567\_L1\_Tile|1  
GATCCTAATAGGTTTGCATTGATTGATAATGGTTTCTATGATTCTGACCATGAACGTCTT  
>HPV65\_Gamma\_312100\_nt5582\_L1\_Tile|2  
GCATTGATTGATAATGGTTTCTATGATTCTGACCATGAACGTCTTGTGGAGACTCAGA  
>HPV65\_Gamma\_312100\_nt5587\_L1\_Tile|1  
GATTGATAATGGTTTCTATGATTCTGACCATGAACGTCTTGTGGAGACTCAGAGGAAT

>HPV65\_Gamma\_312100\_nt5592\_L1\_Tile|1  
ATAATGGTTTCTATGATTCTGACCATGAACGTCTTGTTTGGGAGACTCAGAGGAATAGAAA  
>HPV65\_Gamma\_312100\_nt5597\_L1\_Tile|1  
GGTTTCTATGATTCTGACCATGAACGTCTTGTTTGGGAGACTCAGAGGAATAGAAATAGGT  
>HPV65\_Gamma\_312100\_nt5612\_L1\_Tile|1  
GACCATGAACGTCTTGTTTGGGAGACTCAGAGGAATAGAAATAGGTAGGGGTGGTCCCCTT  
>HPV65\_Gamma\_312100\_nt5617\_L1\_Tile|1  
TGAACGTCTTGTTTGGGAGACTCAGAGGAATAGAAATAGGTAGGGGTGGTCCCCTTGGGAT  
>HPV65\_Gamma\_312100\_nt5622\_L1\_Tile|2  
GTCTTGTTTGGGAGACTCAGAGGAATAGAAATAGGTAGGGGTGGTCCCCTTGGGATTGGAA  
>HPV65\_Gamma\_312100\_nt5637\_L1\_Tile|1  
TCAGAGGAATAGAAATAGGTAGGGGTGGTCCCCTTGGGATTGGAACAACAGGCCATCCTT  
>HPV65\_Gamma\_312100\_nt5642\_L1\_Tile|2  
GGAATAGAAATAGGTAGGGGTGGTCCCCTTGGGATTGGAACAACAGGCCATCCTTTATAT  
>HPV65\_Gamma\_312100\_nt5652\_L1\_Tile|1  
TAGGTAGGGGTGGTCCCCTTGGGATTGGAACAACAGGCCATCCTTTATATAATAAGTTTG  
>HPV65\_Gamma\_312100\_nt5832\_L1\_Tile|1  
ATTGGGATAAGGCTGAGCCTTGTCAGTCCTGTTTCCTCAACCAGGAGATTGTCCTCCTA  
>HPV65\_Gamma\_312100\_nt6037\_L1\_Tile|1  
AATGAGTAAAGATGTCTATGGAGATAGCTTATTTCTTTTATGGTAGGCGAGAACAGTTATA  
>HPV65\_Gamma\_312100\_nt6052\_L1\_Tile|1  
CTATGGAGATAGCTTATTCTTTTATGGTAGGCGAGAACAGTTATATGCCAGGCACTTTTT  
>HPV65\_Gamma\_312100\_nt6117\_L1\_Tile|1  
GAGCAGGAGCAATGGGAGATGCACTACCAGAACCTTTTCGAGGTTAAAACTGATTACTGGA  
>HPV65\_Gamma\_312100\_nt6122\_L1\_Tile|2  
GGAGCAATGGGAGATGCACTACCAGAACCTTTTCGAGGTTAAAACTGATTACTGGATTCCCT  
>HPV65\_Gamma\_312100\_nt6127\_L1\_Tile|1  
AATGGGAGATGCACTACCAGAACCTTTTCGAGGTTAAAACTGATTACTGGATTCCCTGCTCA  
>HPV65\_Gamma\_312100\_nt6132\_L1\_Tile|1  
GAGATGCACTACCAGAACCTTTTCGAGGTTAAAACTGATTACTGGATTCCCTGCTCAAGAAG  
>HPV65\_Gamma\_312100\_nt6137\_L1\_Tile|1  
GCACTACCAGAACCTTTTCGAGGTTAAAACTGATTACTGGATTCCCTGCTCAAGAAGGTCAG  
>HPV65\_Gamma\_312100\_nt6142\_L1\_Tile|2  
ACCAGAACCTTTTCGAGGTTAAAACTGATTACTGGATTCCCTGCTCAAGAAGGTCAGGATCA  
>HPV65\_Gamma\_312100\_nt6147\_L1\_Tile|1  
AACCTTTTCGAGGTTAAAACTGATTACTGGATTCCCTGCTCAAGAAGGTCAGGATCAGAATA  
>HPV65\_Gamma\_312100\_nt6157\_L1\_Tile|1  
GGTTAAAACTGATTACTGGATTCCCTGCTCAAGAAGGTCAGGATCAGAATACTTTAGGTCC  
>HPV65\_Gamma\_312100\_nt6162\_L1\_Tile|2  
AAACTGATTACTGGATTCCCTGCTCAAGAAGGTCAGGATCAGAATACTTTAGGTCCACATA  
>HPV65\_Gamma\_312100\_nt6167\_L1\_Tile|1  
GATTACTGGATTCCCTGCTCAAGAAGGTCAGGATCAGAATACTTTAGGTCCACATATATAT  
>HPV65\_Gamma\_312100\_nt6182\_L1\_Tile|2  
GCTCAAGAAGGTCAGGATCAGAATACTTTAGGTCCACATATATATATATAGGCACTCCTAGT  
>HPV65\_Gamma\_312100\_nt6187\_L1\_Tile|1  
AGAAGGTCAGGATCAGAATACTTTAGGTCCACATATATATATATAGGCACTCCTAGTGGATC  
>HPV65\_Gamma\_312100\_nt6197\_L1\_Tile|1  
GATCAGAATACTTTAGGTCCACATATATATATAGGCACTCCTAGTGGATCTTTAGTTTCA  
>HPV65\_Gamma\_312100\_nt6202\_L1\_Tile|2  
GAATACTTTAGGTCCACATATATATATATAGGCACTCCTAGTGGATCTTTAGTTTCAAGTGA  
>HPV65\_Gamma\_312100\_nt6207\_L1\_Tile|1  
CTTTAGGTCCACATATATATATATAGGCACTCCTAGTGGATCTTTAGTTTCAAGTGAGTCCC  
>HPV65\_Gamma\_312100\_nt6337\_L1\_Tile|1  
ATTATTTGTGACACTTGTTGACAATACTCATAATACTAATTTTACTATTTCTGTAAAAAC  
>HPV65\_Gamma\_312100\_nt6392\_L1\_Tile|1

AAAACAGAAGCAGCTGATGAATCCTATAAAATATAAAGCAGGTGATTTTAAACAGTATTTA  
>HPV65\_Gamma\_312100\_nt6612\_L1\_Tile|1  
ATAGATTTATACAATCCAGAGCTACGAGATGTCCTACTCAGTCTCCCAGTACTGAAAAGG  
>HPV65\_Gamma\_312100\_nt6617\_L1\_Tile|1  
TTTATACAATCCAGAGCTACGAGATGTCCTACTCAGTCTCCCAGTACTGAAAAGGAAGAC  
>HPV65\_Gamma\_312100\_nt6632\_L1\_Tile|1  
GCTACGAGATGTCCTACTCAGTCTCCCAGTACTGAAAAGGAAGACCCCTTATAAAGATTTA  
>HPV65\_Gamma\_312100\_nt6752\_L1\_Tile|1  
GGGAGACGCTTTTTATATCAAAGTGGTTTAATTAATGGAACACTTAAAAGAAAACGTACT  
>HPV65\_Gamma\_312100\_nt6757\_L1\_Tile|1  
ACGCTTTTTATATCAAAGTGGTTTAATTAATGGAACACTTAAAAGAAAACGTACTATTAA  
>HPV65\_Gamma\_312100\_nt6762\_L1\_Tile|2  
TTTTATATCAAAGTGGTTTAATTAATGGAACACTTAAAAGAAAACGTACTATTAAATTCTC  
>HPV65\_Gamma\_312100\_nt6767\_L1\_Tile|1  
TATCAAAGTGGTTTAATTAATGGAACACTTAAAAGAAAACGTACTATTAAATTCTCAAGCT  
>HPV65\_Gamma\_312100\_nt6772\_L1\_Tile|1  
AAGTGGTTTAATTAATGGAACACTTAAAAGAAAACGTACTATTAAATTCTCAAGCTCCAAC  
>HPV65\_Gamma\_312100\_nt6777\_L1\_Tile|1  
GTTTAATTAATGGAACACTTAAAAGAAAACGTACTATTAAATTCTCAAGCTCCAAGTAGTA  
>HPV65\_Gamma\_312100\_nt6782\_L1\_Tile|2  
ATTAATGGAACACTTAAAAGAAAACGTACTATTAAATTCTCAAGCTCCAAGTAGTATTAAA  
>HPV65\_Gamma\_312100\_nt6787\_L1\_Tile|1  
TGGAACACTTAAAAGAAAACGTACTATTAAATTCTCAAGCTCCAAGTAGTATTAAACGTTT  
>HPV66\_Alpha\_1020290\_nt5763\_L1\_Tile|1  
GCTCTAGGTTGCTTGCTGTTGGCCATCCTTATTACTCTGTTTCCAAATCTGGTACCAAAA  
>HPV66\_Alpha\_1020290\_nt5778\_L1\_Tile|1  
CTGTTGGCCATCCTTATTACTCTGTTTCCAAATCTGGTACCAAAAACAAACATCCCTAAAG  
>HPV66\_Alpha\_1020290\_nt6148\_L1\_Tile|1  
TTGGACTAAGGGCGCGGTGTGTAAGTCTACACCAGGTAATACAGGGGATTGTCCACCTCT  
>HPV66\_Alpha\_1020290\_nt6153\_L1\_Tile|1  
CTAAGGGCGCGGTGTGTAAGTCTACACCAGGTAATACAGGGGATTGTCCACCTCTTGTCAT  
>HPV66\_Alpha\_1020290\_nt6168\_L1\_Tile|1  
GTAAGTCTACACCAGGTAATACAGGGGATTGTCCACCTCTTGTCATTAGTTAATACCCCGA  
>HPV66\_Alpha\_1020290\_nt6183\_L1\_Tile|1  
GTAATACAGGGGATTGTCCACCTCTTGTCATTAGTTAATACCCCGATAGAGGACGGTGACA  
>HPV66\_Alpha\_1020290\_nt6418\_L1\_Tile|1  
ACATTACTTTAATAGGGCAGGTAATGTTGGGGAAGCCATTTCCTACAGATTTGTATTGGAA  
>HPV66\_Alpha\_1020290\_nt6428\_L1\_Tile|1  
AATAGGGCAGGTAATGTTGGGGAAGCCATTTCCTACAGATTTGTATTGGAAGGGTGGCAAT  
>HPV66\_Alpha\_1020290\_nt6438\_L1\_Tile|1  
GTAATGTTGGGGAAGCCATTTCCTACAGATTTGTATTGGAAGGGTGGCAATGGCAGGGACC  
>HPV66\_Alpha\_1020290\_nt6443\_L1\_Tile|1  
GTTGGGGAAGCCATTTCCTACAGATTTGTATTGGAAGGGTGGCAATGGCAGGGACCCTCCT  
>HPV66\_Alpha\_1020290\_nt6448\_L1\_Tile|1  
GGAAGCCATTTCCTACAGATTTGTATTGGAAGGGTGGCAATGGCAGGGACCCTCCTCCCAG  
>HPV66\_Alpha\_1020290\_nt6453\_L1\_Tile|1  
CCATTCTACAGATTTGTATTGGAAGGGTGGCAATGGCAGGGACCCTCCTCCCAGTTCTG  
>HPV66\_Alpha\_1020290\_nt6458\_L1\_Tile|1  
CCTACAGATTTGTATTGGAAGGGTGGCAATGGCAGGGACCCTCCTCCCAGTTCTGTATAT  
>HPV66\_Alpha\_1020290\_nt6718\_L1\_Tile|1  
AATCAATCAATACCTTCGCCATGTGGAGGAATATGAACACTACAGTTTGTGTTTCACTTTG  
>HPV66\_Alpha\_1020290\_nt6793\_L1\_Tile|1  
TGCAGAAAGTTATGGCATATTTGCATAATATGAATAATACTTTATTAGACGATTGGAATAT  
>HPV66\_Alpha\_1020290\_nt6798\_L1\_Tile|1  
AAGTTATGGCATATTTGCATAATATGAATAATACTTTATTAGACGATTGGAATATTGGCT



>HPV66\_Alpha\_1020290\_nt6808\_L1\_Tile|1  
ATATTTGCATAATATGAATAATACTTTATTAGACGATTGGAATATTGGCTTATCCCCACC  
>HPV66\_Alpha\_1020290\_nt6813\_L1\_Tile|1  
TGCATAATATGAATAATACTTTATTAGACGATTGGAATATTGGCTTATCCCCACCAGTTG  
>HPV66\_Alpha\_1020290\_nt6823\_L1\_Tile|1  
GAATAATACTTTATTAGACGATTGGAATATTGGCTTATCCCCACCAGTTGCAACTAGCTT  
>HPV66\_Alpha\_1020290\_nt6828\_L1\_Tile|1  
ATACTTTATTAGACGATTGGAATATTGGCTTATCCCCACCAGTTGCAACTAGCTTAGAGG  
>HPV66\_Alpha\_1020290\_nt6833\_L1\_Tile|1  
TTATTAGACGATTGGAATATTGGCTTATCCCCACCAGTTGCAACTAGCTTAGAGGATAAA  
>HPV66\_Alpha\_1020290\_nt6838\_L1\_Tile|1  
AGACGATTGGAATATTGGCTTATCCCCACCAGTTGCAACTAGCTTAGAGGATAAATATAG  
>HPV66\_Alpha\_1020290\_nt6853\_L1\_Tile|1  
TGGCTTATCCCCACCAGTTGCAACTAGCTTAGAGGATAAATATAGGTATATTTAAAGCAC  
>HPV66\_Alpha\_1020290\_nt6863\_L1\_Tile|1  
CCACCAGTTGCAACTAGCTTAGAGGATAAATATAGGTATATTTAAAGCACAGCTATTACA  
>HPV66\_Alpha\_1020290\_nt7038\_L1\_Tile|1  
GAAAATTTTAAATGCAACTAGGCCCTAGACCCCTAGACCCAAGGCTAGTGTATCTGCCT  
>HPV66\_Alpha\_1020290\_nt7043\_L1\_Tile|1  
TTTTTAATGCAACTAGGCCCTAGACCCCTAGACCCAAGGCTAGTGTATCTGCCTCTAAA  
>HPV66\_Alpha\_1020290\_nt7063\_L1\_Tile|1  
TAGACCCCTAGACCCAAGGCTAGTGTATCTGCCTCTAAAAGGCGGGCGGCTCCTACCTC  
>HPV66\_Alpha\_1020290\_nt7078\_L1\_Tile|1  
CAAGGCTAGTGTATCTGCCTCTAAAAGGCGGGCGGCTCCTACCTCTTCTCTTCTTACC  
>HPV66\_Alpha\_1020290\_nt7083\_L1\_Tile|1  
CTAGTGTATCTGCCTCTAAAAGGCGGGCGGCTCCTACCTCTTCTCTTCTTACCAGCTA  
>HPV67\_Alpha\_3228267\_nt5725\_L1\_Tile|1  
GCTGGTAGCTCCAGACTTTTAGCTGTAGGCCATCCTTACTTTTCCATTCCCTAATCCCTCC  
>HPV67\_Alpha\_3228267\_nt5735\_L1\_Tile|1  
CCAGACTTTTAGCTGTAGGCCATCCTTACTTTTCCATTCCCTAATCCCTCCAACACTAAAA  
>HPV67\_Alpha\_3228267\_nt5740\_L1\_Tile|1  
CTTTTAGCTGTAGGCCATCCTTACTTTTCCATTCCCTAATCCCTCCAACACTAAAAAGGTG  
>HPV67\_Alpha\_3228267\_nt5750\_L1\_Tile|1  
TAGGCCATCCTTACTTTTCCATTCCCTAATCCCTCCAACACTAAAAAGGTGTTAGTGCCCA  
>HPV67\_Alpha\_3228267\_nt5760\_L1\_Tile|1  
TTACTTTTCCATTCCCTAATCCCTCCAACACTAAAAAGGTGTTAGTGCCCAAGGTGTCAGG  
>HPV67\_Alpha\_3228267\_nt5765\_L1\_Tile|1  
TTTCCATTCCCTAATCCCTCCAACACTAAAAAGGTGTTAGTGCCCAAGGTGTCAGGTTTGC  
>HPV67\_Alpha\_3228267\_nt5970\_L1\_Tile|1  
TAGTGACATCCATTACTTAATAAGTTTGATGATACTGAAACAAATAATAAATACCCTAG  
>HPV67\_Alpha\_3228267\_nt5975\_L1\_Tile|1  
GACATCCATTACTTAATAAGTTTGATGATACTGAAACAAATAATAAATACCCTAGCCAGC  
>HPV67\_Alpha\_3228267\_nt5985\_L1\_Tile|1  
ACTTAATAAGTTTGATGATACTGAAACAAATAATAAATACCCTAGCCAGCCTGGTACTGA  
>HPV67\_Alpha\_3228267\_nt6005\_L1\_Tile|1  
CTGAAACAAATAATAAATACCCTAGCCAGCCTGGTACTGATAATAGGGAATGCTTGTCTA  
>HPV67\_Alpha\_3228267\_nt6020\_L1\_Tile|1  
AATACCCTAGCCAGCCTGGTACTGATAATAGGGAATGCTTGTCTATGGATGCTAAGCAAA  
>HPV67\_Alpha\_3228267\_nt6105\_L1\_Tile|1  
ACCTCCTACAGGTGAACACTGGGGTAAAGGTACCCCGTGTAGTGGTAACAGTAATGGGCC  
>HPV67\_Alpha\_3228267\_nt6280\_L1\_Tile|1  
CCGTTAGATATATGTACCAGTATTTGTAAATATCCTGATTATCTTGGTATGGCTAGCGAG  
>HPV67\_Alpha\_3228267\_nt6320\_L1\_Tile|1  
ATCTTGGTATGGCTAGCGAGGCTTATGGGGACAGTTTATTTTTCTTCTTCTGCGACGTGAGC  
>HPV67\_Alpha\_3228267\_nt6360\_L1\_Tile|1

TTTCTTCCTGCGACGTGAGCAAATGTTTGTAGGCATTTGTTTAAACAGAGCAGGTAAATT  
>HPV67\_Alpha\_3228267\_nt6385\_L1\_Tile|1  
TTTGTTAGGCATTTGTTTAAACAGAGCAGGTAAATTAGGGGAGGATGTACCTACAGATTTG  
>HPV67\_Alpha\_3228267\_nt6395\_L1\_Tile|1  
ATTTGTTTAAACAGAGCAGGTAAATTAGGGGAGGATGTACCTACAGATTTGTATTTTAAGG  
>HPV67\_Alpha\_3228267\_nt6400\_L1\_Tile|1  
TTTAAACAGAGCAGGTAAATTAGGGGAGGATGTACCTACAGATTTGTATTTTAAGGGATCT  
>HPV67\_Alpha\_3228267\_nt6405\_L1\_Tile|1  
CAGAGCAGGTAAATTAGGGGAGGATGTACCTACAGATTTGTATTTTAAGGGATCTGCAAA  
>HPV67\_Alpha\_3228267\_nt6410\_L1\_Tile|1  
CAGGTAAATTAGGGGAGGATGTACCTACAGATTTGTATTTTAAGGGATCTGCAAACACTT  
>HPV67\_Alpha\_3228267\_nt6415\_L1\_Tile|1  
AAATTAGGGGAGGATGTACCTACAGATTTGTATTTTAAGGGATCTGCAAACACTTCTGCA  
>HPV67\_Alpha\_3228267\_nt6430\_L1\_Tile|1  
GTACCTACAGATTTGTATTTTAAGGGATCTGCAAACACTTCTGCACTGCAAACCTCAGCT  
>HPV67\_Alpha\_3228267\_nt6435\_L1\_Tile|1  
TACAGATTTGTATTTTAAGGGATCTGCAAACACTTCTGCACTGCAAACCTCAGCTTTTTT  
>HPV67\_Alpha\_3228267\_nt6440\_L1\_Tile|1  
ATTTGTATTTTAAGGGATCTGCAAACACTTCTGCACTGCAAACCTCAGCTTTTTTTCCTA  
>HPV67\_Alpha\_3228267\_nt6450\_L1\_Tile|1  
TAAGGGATCTGCAAACACTTCTGCACTGCAAACCTCAGCTTTTTTTCCTACTCCCAGTGG  
>HPV67\_Alpha\_3228267\_nt6620\_L1\_Tile|1  
TAGACACTACACGTAGTACCAACATGACTTTATGTTCTGAGGAAAAATCAGAGGCTACAT  
>HPV67\_Alpha\_3228267\_nt6625\_L1\_Tile|1  
ACTACACGTAGTACCAACATGACTTTATGTTCTGAGGAAAAATCAGAGGCTACATACAAA  
>HPV67\_Alpha\_3228267\_nt6630\_L1\_Tile|1  
ACGTAGTACCAACATGACTTTATGTTCTGAGGAAAAATCAGAGGCTACATACAAAAATGA  
>HPV67\_Alpha\_3228267\_nt6735\_L1\_Tile|1  
GTTTATATTTTCTGCTGTGCAAAATATCCCTTACTGCAATGTTATGCAATACATACACAC  
>HPV67\_Alpha\_3228267\_nt6750\_L1\_Tile|1  
GTGCAAAATATCCCTTACTGCAATGTTATGCAATACATACACACCATGAATCCAGATAT  
>HPV67\_Alpha\_3228267\_nt6755\_L1\_Tile|1  
AAATATCCCTTACTGCAATGTTATGCAATACATACACACCATGAATCCAGATATATTAG  
>HPV67\_Alpha\_3228267\_nt6760\_L1\_Tile|1  
TCCCTTACTGCAATGTTATGCAATACATACACACCATGAATCCAGATATATTAGAGGAC  
>HPV67\_Alpha\_3228267\_nt6765\_L1\_Tile|1  
TACTGCAATGTTATGCAATACATACACACCATGAATCCAGATATATTAGAGGACTGGCA  
>HPV67\_Alpha\_3228267\_nt6770\_L1\_Tile|1  
CAAATGTTATGCAATACATACACACCATGAATCCAGATATATTAGAGGACTGGCAATTTG  
>HPV67\_Alpha\_3228267\_nt6890\_L1\_Tile|1  
CTATTACCTGTCAAAAAACATCCCCTCCAACAGCAAAGGAAGATCCTCTTAAAAAGTACA  
>HPV67\_Alpha\_3228267\_nt6895\_L1\_Tile|1  
ACCTGTCAAAAAACATCCCCTCCAACAGCAAAGGAAGATCCTCTTAAAAAGTACAGTTTT  
>HPV67\_Alpha\_3228267\_nt7015\_L1\_Tile|1  
AAATTTTATTTGTCAGGCAGGTTTTACAGCTAAACCTAAACTAAAACGTTCTTCACCTTCT  
>HPV67\_Alpha\_3228267\_nt7020\_L1\_Tile|1  
TTTATTGCAGGCAGGTTTTACAGCTAAACCTAAACTAAAACGTTCTTCACCTTCTTCTTC  
>HPV68a\_Alpha\_71726685\_nt5599\_L1\_Tile|1  
TGGTACATCTAGGTTATTAAGTGTAGGCCATCCATATTTTAAGGTTCCCTATGTCTGGGGG  
>HPV68a\_Alpha\_71726685\_nt5979\_L1\_Tile|1  
CTATTGGCGAGCACTGGGCCAAAGGTAAATCTTGTAAGCCTACCAATGTACAACAAGGGG  
>HPV68a\_Alpha\_71726685\_nt5999\_L1\_Tile|1  
AAAGGTAAATCTTGTAAGCCTACCAATGTACAACAAGGGGACTGTCCCCCATTTGGAATTG  
>HPV68a\_Alpha\_71726685\_nt6004\_L1\_Tile|1  
TAAATCTTGTAAGCCTACCAATGTACAACAAGGGGACTGTCCCCCATTTGGAATTGGTAAA

>HPV68a\_Alpha\_71726685\_nt6009\_L1\_Tile|1  
CTTGTAAGCCTACCAATGTACAACAAGGGGACTGTCCCCATTGGAATTGGTAAATACTC  
>HPV68a\_Alpha\_71726685\_nt6114\_L1\_Tile|1  
ACTTTGGTACATTACAAGAAACGAAAAGCGAGGTACCTTTGGATATATGTCAATCTGTTT  
>HPV68a\_Alpha\_71726685\_nt6254\_L1\_Tile|1  
TTTGCCAGGCATTTTTTGGAAATAGGGGAGGCATGGTAGGGGACACTATTCCCCTGACATG  
>HPV68a\_Alpha\_71726685\_nt6259\_L1\_Tile|1  
CAGGCATTTTTTGGAAATAGGGGAGGCATGGTAGGGGACACTATTCCCCTGACATGTATAT  
>HPV68a\_Alpha\_71726685\_nt6264\_L1\_Tile|1  
ATTTTTTGGAAATAGGGGAGGCATGGTAGGGGACACTATTCCCCTGACATGTATATTAAGG  
>HPV68a\_Alpha\_71726685\_nt6279\_L1\_Tile|1  
GAGGCATGGTAGGGGACACTATTCCCCTGACATGTATATTAAGGGCACTGACATTCGTG  
>HPV68a\_Alpha\_71726685\_nt6289\_L1\_Tile|1  
AGGGGACACTATTCCCCTGACATGTATATTAAGGGCACTGACATTCGTGAAACTCCTAG  
>HPV68a\_Alpha\_71726685\_nt6294\_L1\_Tile|1  
ACACTATTCCCCTGACATGTATATTAAGGGCACTGACATTCGTGAAACTCCTAGTAGTT  
>HPV68a\_Alpha\_71726685\_nt6299\_L1\_Tile|1  
ATTCCCCTGACATGTATATTAAGGGCACTGACATTCGTGAAACTCCTAGTAGTTATGTG  
>HPV68a\_Alpha\_71726685\_nt6304\_L1\_Tile|1  
CACTGACATGTATATTAAGGGCACTGACATTCGTGAAACTCCTAGTAGTTATGTGTATGC  
>HPV68a\_Alpha\_71726685\_nt6469\_L1\_Tile|1  
TCAATTATTTCTTACCGTTGTGGATACAACGCGCAGTACTAATTTTACATTGTCCACTAC  
>HPV68a\_Alpha\_71726685\_nt6489\_L1\_Tile|1  
TGGATACAACGCGCAGTACTAATTTTACATTGTCCACTACTACAGACTCTACTGTACCAG  
>HPV68a\_Alpha\_71726685\_nt6504\_L1\_Tile|1  
GTACTAATTTTACATTGTCCACTACTACAGACTCTACTGTACCAGCTGTGTATGATTCTA  
>HPV68a\_Alpha\_71726685\_nt6509\_L1\_Tile|1  
AATTTTACATTGTCCACTACTACAGACTCTACTGTACCAGCTGTGTATGATTCTAATAAAA  
>HPV68a\_Alpha\_71726685\_nt6514\_L1\_Tile|1  
TACATTGTCCACTACTACAGACTCTACTGTACCAGCTGTGTATGATTCTAATAAATTTAA  
>HPV68a\_Alpha\_71726685\_nt6624\_L1\_Tile|1  
TGTGTACTATAACATTATCCACTGATGTAATGTCATATATACATACTATGAATCCTGCTA  
>HPV68a\_Alpha\_71726685\_nt6729\_L1\_Tile|1  
GTCTTGTTAGATACATACCGCTACCTACAATCAGCAGCAATTACATGTCAAAGGACGCCC  
>HPV68a\_Alpha\_71726685\_nt6819\_L1\_Tile|1  
GTCTTAACCTTTTGGAAATGTGGATTTAAAGGAAAAGTTTAGTTCTGAACTGGACCAATTCC  
>HPV68a\_Alpha\_71726685\_nt6824\_L1\_Tile|1  
AACTTTTGGAAATGTGGATTTAAAGGAAAAGTTTAGTTCTGAACTGGACCAATTCCCATTA  
>HPV68a\_Alpha\_71726685\_nt6839\_L1\_Tile|1  
GATTTAAAGGAAAAGTTTAGTTCTGAACTGGACCAATTCCCATTAGGACGCAAATTTCTG  
>HPV68a\_Alpha\_71726685\_nt6844\_L1\_Tile|1  
AAAGGAAAAGTTTAGTTCTGAACTGGACCAATTCCCATTAGGACGCAAATTTCTGTTACA  
>HPV68a\_Alpha\_71726685\_nt6849\_L1\_Tile|1  
AAAAGTTTAGTTCTGAACTGGACCAATTCCCATTAGGACGCAAATTTCTGTTACAGGCAG  
>HPV68a\_Alpha\_71726685\_nt6859\_L1\_Tile|1  
TTCTGAACTGGACCAATTCCCATTAGGACGCAAATTTCTGTTACAGGCAGGTGTTTCGCAG  
>HPV68a\_Alpha\_71726685\_nt6864\_L1\_Tile|1  
AACTGGACCAATTCCCATTAGGACGCAAATTTCTGTTACAGGCAGGTGTTTCGCAGACGGC  
>HPV68a\_Alpha\_71726685\_nt6869\_L1\_Tile|1  
GACCAATTCCCATTAGGACGCAAATTTCTGTTACAGGCAGGTGTTTCGCAGACGGCCCACC  
>HPV68a\_Alpha\_71726685\_nt6874\_L1\_Tile|1  
ATTCCCATTAGGACGCAAATTTCTGTTACAGGCAGGTGTTTCGCAGACGGCCCACCATAGG  
>HPV68a\_Alpha\_71726685\_nt6924\_L1\_Tile|1  
CCACCATAGGCCCTCGTAAACGCACTGCCACTGCAGCTACCACATCTACCTCTAAACACA  
>HPV68a\_Alpha\_71726685\_nt6929\_L1\_Tile|1

ATAGGCCCTCGTAAACGCACTGCCACTGCAGCTACCACATCTACCTCTAAACACAAACGT  
>HPV69\_Alpha\_6970418\_nt5592\_L1\_Tile|1  
TGTGTCCCGGTTGTCAGACGGATGAATATGTACACGCACCGGATATATTACTATGCAGG  
>HPV69\_Alpha\_6970418\_nt5602\_L1\_Tile|2  
GTTGTCAGACGGATGAATATGTACACGCACCGGATATATTACTATGCAGGCAGCTCTCGA  
>HPV69\_Alpha\_6970418\_nt5607\_L1\_Tile|1  
CAGACGGATGAATATGTACACGCACCGGATATATTACTATGCAGGCAGCTCTCGATTATT  
>HPV69\_Alpha\_6970418\_nt5612\_L1\_Tile|1  
GGATGAATATGTACACGCACCGGATATATTACTATGCAGGCAGCTCTCGATTATTAACCT  
>HPV69\_Alpha\_6970418\_nt5617\_L1\_Tile|1  
AATATGTACACGCACCGGATATATTACTATGCAGGCAGCTCTCGATTATTAACCTTGGGT  
>HPV69\_Alpha\_6970418\_nt5652\_L1\_Tile|1  
CAGCTCTCGATTATTAACCTTGGGTTCATCCCTATTTTCCAATTCCTAAATCTGGTTCAAC  
>HPV69\_Alpha\_6970418\_nt5657\_L1\_Tile|1  
CTCGATTATTAACCTTGGGTTCATCCCTATTTTCCAATTCCTAAATCTGGTTCAACAGCAG  
>HPV69\_Alpha\_6970418\_nt5662\_L1\_Tile|2  
TTATTAACCTTGGGTTCATCCCTATTTTCCAATTCCTAAATCTGGTTCAACAGCAGAAATT  
>HPV69\_Alpha\_6970418\_nt5682\_L1\_Tile|2  
CTATTTTCCAATTCCTAAATCTGGTTCAACAGCAGAAATTCCTAAAGTGTCTGCTTACCA  
>HPV69\_Alpha\_6970418\_nt5687\_L1\_Tile|1  
TTCCAATTCCTAAATCTGGTTCAACAGCAGAAATTCCTAAAGTGTCTGCTTACCAATATA  
>HPV69\_Alpha\_6970418\_nt5917\_L1\_Tile|1  
GACACTGAAAATTCACATCTTGCCACTGCTAATGCAGACACTGATAATAGGGACAACGTG  
>HPV69\_Alpha\_6970418\_nt5927\_L1\_Tile|1  
ATTCACATCTTGCCACTGCTAATGCAGACACTGATAATAGGGACAACGTGTGTGTAGATA  
>HPV69\_Alpha\_6970418\_nt5932\_L1\_Tile|1  
CATCTTGCCACTGCTAATGCAGACACTGATAATAGGGACAACGTGTGTGTAGATAATAAA  
>HPV69\_Alpha\_6970418\_nt6007\_L1\_Tile|1  
ATTATTGGATGTACCCCTCCTTTAGGTGAACACTGGGGCGTTGGCACTGTATGTAAAAAT  
>HPV69\_Alpha\_6970418\_nt6012\_L1\_Tile|1  
TGGATGTACCCCTCCTTTAGGTGAACACTGGGGCGTTGGCACTGTATGTAAAAATGCACA  
>HPV69\_Alpha\_6970418\_nt6017\_L1\_Tile|1  
GTACCCCTCCTTTAGGTGAACACTGGGGCGTTGGCACTGTATGTAAAAATGCACAGTCTC  
>HPV69\_Alpha\_6970418\_nt6167\_L1\_Tile|1  
ATTTTACAGCTTTGCAAGCTACAAAATGTGATGTGCCACTTGATATTAATCAATCTATTT  
>HPV69\_Alpha\_6970418\_nt6172\_L1\_Tile|1  
ACAGCTTTGCAAGCTACAAAATGTGATGTGCCACTTGATATTAATCAATCTATTTGCAAA  
>HPV69\_Alpha\_6970418\_nt6317\_L1\_Tile|1  
ATTTTTTTTAAATAAAGCTGGCACTATAGGTGATTCTGTACCAGTATCTATGTATATTAAAG  
>HPV69\_Alpha\_6970418\_nt6322\_L1\_Tile|2  
TTTAATAAAGCTGGCACTATAGGTGATTCTGTACCAGTATCTATGTATATTAAAGGCGCT  
>HPV69\_Alpha\_6970418\_nt6327\_L1\_Tile|1  
TAAAGCTGGCACTATAGGTGATTCTGTACCAGTATCTATGTATATTAAAGGCGCTGGTCA  
>HPV69\_Alpha\_6970418\_nt6332\_L1\_Tile|1  
CTGGCACTATAGGTGATTCTGTACCAGTATCTATGTATATTAAAGGCGCTGGTCAAGGTC  
>HPV69\_Alpha\_6970418\_nt6337\_L1\_Tile|1  
ACTATAGGTGATTCTGTACCAGTATCTATGTATATTAAAGGCGCTGGTCAAGGTCGTGAA  
>HPV69\_Alpha\_6970418\_nt6342\_L1\_Tile|2  
AGGTGATTCTGTACCAGTATCTATGTATATTAAAGGCGCTGGTCAAGGTCGTGAACCTCC  
>HPV69\_Alpha\_6970418\_nt6357\_L1\_Tile|1  
AGTATCTATGTATATTAAAGGCGCTGGTCAAGGTCGTGAACCTCCAACCTACTTCTATATA  
>HPV69\_Alpha\_6970418\_nt6362\_L1\_Tile|2  
CTATGTATATTAAAGGCGCTGGTCAAGGTCGTGAACCTCCAACCTACTTCTATATACTCAC  
>HPV69\_Alpha\_6970418\_nt6367\_L1\_Tile|1  
TATATTAAAGGCGCTGGTCAAGGTCGTGAACCTCCAACCTACTTCTATATACTCACGTACG

>HPV69\_Alpha\_6970418\_nt6377\_L1\_Tile|1  
GCGCTGGTCAAGGTCGTGAACCTCCAACCTACTTCTATATACTCACGTACGCCTAGTGGCT  
>HPV69\_Alpha\_6970418\_nt6387\_L1\_Tile|1  
AGGTGCGTGAACCTCCAACCTACTTCTATATACTCACGTACGCCTAGTGGCTCCATGGTGAC  
>HPV69\_Alpha\_6970418\_nt6402\_L1\_Tile|2  
AACTACTTCTATATACTCACGTACGCCTAGTGGCTCCATGGTGACCTCTGATGCTCAATT  
>HPV69\_Alpha\_6970418\_nt6677\_L1\_Tile|1  
AATTGTGTAAAAATTACTCTTACCACTGATGTAATGGCCTATATCCATACAATGAATTCTA  
>HPV69\_Alpha\_6970418\_nt6682\_L1\_Tile|2  
TGTAATAATTACTCTTACCACTGATGTAATGGCCTATATCCATACAATGAATTCTACTATT  
>HPV69\_Alpha\_6970418\_nt6717\_L1\_Tile|1  
TATCCATACAATGAATTCTACTATTTTGAAAAATTGGAATTTTGGCCTTACCTTGCCTCC  
>HPV69\_Alpha\_6970418\_nt6927\_L1\_Tile|1  
TCAATTTCCACTGGGCAGAAAATTTATGCTGCAGGCTGGTATACAGCGACGTCCTAAGTT  
>HPV69\_Alpha\_6970418\_nt6932\_L1\_Tile|1  
TTCCACTGGGCAGAAAATTTATGCTGCAGGCTGGTATACAGCGACGTCCTAAGTTAGGCA  
>HPV69\_Alpha\_6970418\_nt6937\_L1\_Tile|1  
CTGGGCAGAAAATTTATGCTGCAGGCTGGTATACAGCGACGTCCTAAGTTAGGCACCAAA  
>HPV69\_Alpha\_6970418\_nt6942\_L1\_Tile|2  
CAGAAAATTTATGCTGCAGGCTGGTATACAGCGACGTCCTAAGTTAGGCACCAAACGTCC  
>HPV69\_Alpha\_6970418\_nt6947\_L1\_Tile|1  
AATTTATGCTGCAGGCTGGTATACAGCGACGTCCTAAGTTAGGCACCAAACGTCCAGCTT  
>HPV69\_Alpha\_6970418\_nt6957\_L1\_Tile|1  
GCAGGCTGGTATACAGCGACGTCCTAAGTTAGGCACCAAACGTCCAGCTTCTTCCTTATC  
>HPV69\_Alpha\_6970418\_nt6962\_L1\_Tile|2  
CTGGTATACAGCGACGTCCTAAGTTAGGCACCAAACGTCCAGCTTCTTCCTTATCTGCAT  
>HPV69\_Alpha\_6970418\_nt6967\_L1\_Tile|1  
ATACAGCGACGTCCTAAGTTAGGCACCAAACGTCCAGCTTCTTCCTTATCTGCATCTTCC  
>HPV70\_Alpha\_1173493\_nt6391\_L1\_Tile|1  
CACAATACCTTCAGAGTTATATATTAAAGGCACGGATATACGTGAGCGTCCTGGTACTCA  
>HPV70\_Alpha\_1173493\_nt6396\_L1\_Tile|1  
TACCTTCAGAGTTATATATTAAAGGCACGGATATACGTGAGCGTCCTGGTACTCATGTAT  
>HPV70\_Alpha\_1173493\_nt6406\_L1\_Tile|1  
GTTATATATTAAAGGCACGGATATACGTGAGCGTCCTGGTACTCATGTATATTCCCCTTC  
>HPV70\_Alpha\_1173493\_nt6586\_L1\_Tile|1  
GGACACTACACGTAGTACTAATTTTACATTGTCTGCCTGCACCGAAACGGCCATACCTGC  
>HPV70\_Alpha\_1173493\_nt6591\_L1\_Tile|1  
CTACACGTAGTACTAATTTTACATTGTCTGCCTGCACCGAAACGGCCATACCTGCTGTAT  
>HPV70\_Alpha\_1173493\_nt6596\_L1\_Tile|1  
CGTAGTACTAATTTTACATTGTCTGCCTGCACCGAAACGGCCATACCTGCTGTATATAGC  
>HPV70\_Alpha\_1173493\_nt6601\_L1\_Tile|1  
TACTAATTTTACATTGTCTGCCTGCACCGAAACGGCCATACCTGCTGTATATAGCCCTAC  
>HPV70\_Alpha\_1173493\_nt6606\_L1\_Tile|1  
ATTTTACATTGTCTGCCTGCACCGAAACGGCCATACCTGCTGTATATAGCCCTACAAAGT  
>HPV70\_Alpha\_1173493\_nt6611\_L1\_Tile|1  
ACATTGTCTGCCTGCACCGAAACGGCCATACCTGCTGTATATAGCCCTACAAAGTTTAAG  
>HPV70\_Alpha\_1173493\_nt6626\_L1\_Tile|1  
ACCGAAACGGCCATACCTGCTGTATATAGCCCTACAAAGTTTAAGGAATATACTAGGCAT  
>HPV70\_Alpha\_1173493\_nt6711\_L1\_Tile|1  
TATTTCAATTGTGTACTATCACATTAACCTGCTGACGTTATGGCCTACATCCATACTATGA  
>HPV70\_Alpha\_1173493\_nt6746\_L1\_Tile|1  
GTTATGGCCTACATCCATACTATGAATCCTGCAATTTTGGACAATTGGAATATAGGAGTT  
>HPV70\_Alpha\_1173493\_nt6791\_L1\_Tile|1  
TGGAATATAGGAGTTACCCCTCCACCATCTGCAAGCTTGGTGGACACGTATAGGTATTTA  
>HPV70\_Alpha\_1173493\_nt6796\_L1\_Tile|1

TATAGGAGTTACCCCTCCACCATCTGCAAGCTTGGTGGACACGTATAGGTATTTACAATC  
>HPV70\_Alpha\_1173493\_nt6801\_L1\_Tile|1  
GAGTTACCCCTCCACCATCTGCAAGCTTGGTGGACACGTATAGGTATTTACAATCAGCAG  
>HPV70\_Alpha\_1173493\_nt6806\_L1\_Tile|1  
ACCCCTCCACCATCTGCAAGCTTGGTGGACACGTATAGGTATTTACAATCAGCAGCTATA  
>HPV70\_Alpha\_1173493\_nt6811\_L1\_Tile|1  
TCCACCATCTGCAAGCTTGGTGGACACGTATAGGTATTTACAATCAGCAGCTATAGCATG  
>HPV70\_Alpha\_1173493\_nt6831\_L1\_Tile|1  
TGGACACGTATAGGTATTTACAATCAGCAGCTATAGCATGTCAAAAGGATGCTCCTACAC  
>HPV70\_Alpha\_1173493\_nt6836\_L1\_Tile|1  
ACGTATAGGTATTTACAATCAGCAGCTATAGCATGTCAAAAGGATGCTCCTACACCTGAA  
>HPV70\_Alpha\_1173493\_nt7001\_L1\_Tile|1  
GTAGGGGCTCGCAGACGTCTACTATAGGCCCTCGCAAACGCCCTGCGTCAGCTAAATCG  
>HPV70\_Alpha\_1173493\_nt7016\_L1\_Tile|1  
CGTCTACTATAGGCCCTCGCAAACGCCCTGCGTCAGCTAAATCGTCTTCCTCAGCCTCT  
>HPV70\_Alpha\_1173493\_nt7021\_L1\_Tile|1  
TACTATAGGCCCTCGCAAACGCCCTGCGTCAGCTAAATCGTCTTCCTCAGCCTCTAAACA  
>HPV70\_Alpha\_1173493\_nt7026\_L1\_Tile|1  
TAGGCCCTCGCAAACGCCCTGCGTCAGCTAAATCGTCTTCCTCAGCCTCTAAACACAAAC  
>HPV70\_Alpha\_1173493\_nt7031\_L1\_Tile|1  
CCTCGCAAACGCCCTGCGTCAGCTAAATCGTCTTCCTCAGCCTCTAAACACAAACGGAAA  
>HPV71\_Alpha\_12084981\_nt5907\_L1\_Tile|1  
ACGACTATGTTACCAGAACAAAATATTTTATTTATGCTGGTAGTTCTAGATTACTTACTG  
>HPV71\_Alpha\_12084981\_nt5952\_L1\_Tile|1  
CTAGATTACTTACTGTTGGCCATCCATATTTTCCTATTTCGCCAGGCAAGTGGTAAAAATC  
>HPV71\_Alpha\_12084981\_nt5957\_L1\_Tile|1  
TTACTTACTGTTGGCCATCCATATTTTCCTATTTCGCCAGGCAAGTGGTAAAAATCGTATA  
>HPV71\_Alpha\_12084981\_nt5967\_L1\_Tile|1  
TTGGCCATCCATATTTTCCTATTTCGCCAGGCAAGTGGTAAAAATCGTATAGTTGTCCCCA  
>HPV71\_Alpha\_12084981\_nt5972\_L1\_Tile|1  
CATCCATATTTTCCTATTTCGCCAGGCAAGTGGTAAAAATCGTATAGTTGTCCCCAAAGTG  
>HPV71\_Alpha\_12084981\_nt6072\_L1\_Tile|1  
ACCCAAATAAATTTGGACTACCTGATGCTTCATTATACAATCCCGATACCCAGCGCTTAG  
>HPV71\_Alpha\_12084981\_nt6087\_L1\_Tile|1  
GACTACCTGATGCTTCATTATACAATCCCGATACCCAGCGCTTAGTGTGGGCTTGTAAGG  
>HPV71\_Alpha\_12084981\_nt6192\_L1\_Tile|1  
GCCATCCATTGTTTAAACAAGCTTAATGACACTGAAAATGCCACGCTGTTTGATGTTAATC  
>HPV71\_Alpha\_12084981\_nt6197\_L1\_Tile|1  
CCATTGTTTAAACAAGCTTAATGACACTGAAAATGCCACGCTGTTTGATGTTAATCCTGGT  
>HPV71\_Alpha\_12084981\_nt6207\_L1\_Tile|1  
ACAAGCTTAATGACACTGAAAATGCCACGCTGTTTGATGTTAATCCTGGTGAGGATACTC  
>HPV71\_Alpha\_12084981\_nt6222\_L1\_Tile|2  
CTGAAAATGCCACGCTGTTTGATGTTAATCCTGGTGAGGATACTCGGGATAATGTTTCTA  
>HPV71\_Alpha\_12084981\_nt6322\_L1\_Tile|2  
GCCTCCCTTAGGTGAACATTGGGCAAAAGGTACTCCATGCAGTGGCGCTTCAGCTGCCGC  
>HPV71\_Alpha\_12084981\_nt6347\_L1\_Tile|1  
AAAGGTACTCCATGCAGTGGCGCTTCAGCTGCCGCTGGTAGTTGCCCCCACTTGAACCTT  
>HPV71\_Alpha\_12084981\_nt6352\_L1\_Tile|1  
TACTCCATGCAGTGGCGCTTCAGCTGCCGCTGGTAGTTGCCCCCACTTGAACCTTGCCAG  
>HPV71\_Alpha\_12084981\_nt6442\_L1\_Tile|2  
CACAGGTTTTGGGGCAATGGATTTTGCAGCCCTGCAAACAAATAGGTCTGACGTTCCCTT  
>HPV71\_Alpha\_12084981\_nt6452\_L1\_Tile|1  
GGGGCAATGGATTTTGCAGCCCTGCAAACAAATAGGTCTGACGTTCCCTTGGATATTGTT  
>HPV71\_Alpha\_12084981\_nt6467\_L1\_Tile|1  
GCAGCCCTGCAAACAAATAGGTCTGACGTTCCCTTGGATATTGTTACTACAACATGTAAA

>HPV71\_Alpha\_12084981\_nt6517\_L1\_Tile|1  
AACATGTAAATATCAGATTATTTTGAATGGCTGCAGAGCCATTGGTGATCGCATGTTTTT  
>HPV71\_Alpha\_12084981\_nt6522\_L1\_Tile|2  
GTAAATATCAGATTATTTTGAATGGCTGCAGAGCCATTGGTGATCGCATGTTTTTCTTGC  
>HPV71\_Alpha\_12084981\_nt6532\_L1\_Tile|1  
GATTATTTTGAATGGCTGCAGAGCCATTGGTGATCGCATGTTTTTCTTGCGCCGAGAGCA  
>HPV71\_Alpha\_12084981\_nt6547\_L1\_Tile|1  
CTGCAGAGCCATTGGTGATCGCATGTTTTTCTTGCGCCGAGAGCAATGTTTTAAGACATT  
>HPV71\_Alpha\_12084981\_nt6552\_L1\_Tile|1  
GAGCCATTGGTGATCGCATGTTTTTCTTGCGCCGAGAGCAATGTTTTAAGACATTTTATA  
>HPV71\_Alpha\_12084981\_nt6592\_L1\_Tile|1  
ATGTTTTTAAGACATTTTATAATAGGCAGGCACACCTAGGCAGGGTTCCTGATGACTATTA  
>HPV71\_Alpha\_12084981\_nt6602\_L1\_Tile|2  
ACATTTTATAATAGGCAGGCACACCTAGGCAGGGTTCCTGATGACTATTATTTAAAGGTT  
>HPV71\_Alpha\_12084981\_nt6607\_L1\_Tile|1  
TTATAATAGGCAGGCACACCTAGGCAGGGTTCCTGATGACTATTATTTAAAGGTTACCT  
>HPV71\_Alpha\_12084981\_nt6617\_L1\_Tile|1  
CAGGCACACCTAGGCAGGGTTCCTGATGACTATTATTTAAAGGTTACCTTCTACCTTTC  
>HPV71\_Alpha\_12084981\_nt6632\_L1\_Tile|1  
AGGGTTCCTGATGACTATTATTTAAAGGTTACCTTCTACCTTTCGTGCTTCCCCTACAA  
>HPV71\_Alpha\_12084981\_nt6637\_L1\_Tile|1  
TCCTGATGACTATTATTTAAAGGTTACCTTCTACCTTTCGTGCTTCCCCTACAAGCTCT  
>HPV71\_Alpha\_12084981\_nt6642\_L1\_Tile|2  
ATGACTATTATTTAAAGGTTACCTTCTACCTTTCGTGCTTCCCCTACAAGCTCTCTTTA  
>HPV71\_Alpha\_12084981\_nt6647\_L1\_Tile|1  
TATTATTTAAAGGTTACCTTCTACCTTTCGTGCTTCCCCTACAAGCTCTCTTTATGCAT  
>HPV71\_Alpha\_12084981\_nt6657\_L1\_Tile|1  
AGGTTACCTTCTACCTTTCGTGCTTCCCCTACAAGCTCTCTTTATGCATCCACACCTAG  
>HPV71\_Alpha\_12084981\_nt6777\_L1\_Tile|1  
ACAGGGCACAAACAATGGCATTGTGGGCAATCTGCTTTTTGTAAACAGTTGTGACACAT  
>HPV71\_Alpha\_12084981\_nt6782\_L1\_Tile|2  
GCACAAACAATGGCATTGTGGGCAATCTGCTTTTTGTAAACAGTTGTGACACATCACGT  
>HPV71\_Alpha\_12084981\_nt6787\_L1\_Tile|1  
AACAATGGCATTGTGGGCAATCTGCTTTTTGTAAACAGTTGTGACACATCACGTAGTAC  
>HPV71\_Alpha\_12084981\_nt6792\_L1\_Tile|1  
TGGCATTGTGGGCAATCTGCTTTTTGTAAACAGTTGTGACACATCACGTAGTACAAATA  
>HPV71\_Alpha\_12084981\_nt6802\_L1\_Tile|2  
TGGGCAATCTGCTTTTTGTAAACAGTTGTGACACATCACGTAGTACAAATATGTCCATCTG  
>HPV71\_Alpha\_12084981\_nt6807\_L1\_Tile|1  
AATCTGCTTTTTGTAAACAGTTGTGACACATCACGTAGTACAAATATGTCCATCTGTGCTA  
>HPV71\_Alpha\_12084981\_nt6812\_L1\_Tile|1  
GCTTTTTGTAAACAGTTGTGACACATCACGTAGTACAAATATGTCCATCTGTGCTACCAAA  
>HPV71\_Alpha\_12084981\_nt6817\_L1\_Tile|1  
TTGTAAACAGTTGTGACACATCACGTAGTACAAATATGTCCATCTGTGCTACCAAACTGT  
>HPV71\_Alpha\_12084981\_nt6822\_L1\_Tile|2  
ACAGTTGTGACACATCACGTAGTACAAATATGTCCATCTGTGCTACCAAACTGTTGAGT  
>HPV71\_Alpha\_12084981\_nt6827\_L1\_Tile|1  
TGTGACACATCACGTAGTACAAATATGTCCATCTGTGCTACCAAACTGTTGAGTCTACA  
>HPV71\_Alpha\_12084981\_nt6832\_L1\_Tile|1  
CACATCACGTAGTACAAATATGTCCATCTGTGCTACCAAACTGTTGAGTCTACATATAA  
>HPV71\_Alpha\_12084981\_nt6837\_L1\_Tile|1  
CACGTAGTACAAATATGTCCATCTGTGCTACCAAACTGTTGAGTCTACATATAAAGCCT  
>HPV71\_Alpha\_12084981\_nt6852\_L1\_Tile|1  
TGTCCATCTGTGCTACCAAACTGTTGAGTCTACATATAAAGCCTCTAGTTTCATGGAAT  
>HPV71\_Alpha\_12084981\_nt6857\_L1\_Tile|1

ATCTGTGCTACCAAACTGTTGAGTCTACATATAAAGCCTCTAGTTTCATGGAATATTTG  
>HPV71\_Alpha\_12084981\_nt6862\_L1\_Tile|2  
TGCTACCAAACTGTTGAGTCTACATATAAAGCCTCTAGTTTCATGGAATATTTGAGACA  
>HPV71\_Alpha\_12084981\_nt6867\_L1\_Tile|1  
CCAAAACTGTTGAGTCTACATATAAAGCCTCTAGTTTCATGGAATATTTGAGACATGGAG  
>HPV71\_Alpha\_12084981\_nt6872\_L1\_Tile|1  
ACTGTTGAGTCTACATATAAAGCCTCTAGTTTCATGGAATATTTGAGACATGGAGAAGAA  
>HPV71\_Alpha\_12084981\_nt6882\_L1\_Tile|2  
CTACATATAAAGCCTCTAGTTTCATGGAATATTTGAGACATGGAGAAGAATTTGATTTGC  
>HPV71\_Alpha\_12084981\_nt6887\_L1\_Tile|1  
TATAAAGCCTCTAGTTTCATGGAATATTTGAGACATGGAGAAGAATTTGATTTGCAATTT  
>HPV71\_Alpha\_12084981\_nt6967\_L1\_Tile|1  
TAATTTAACAGCTGAAATTATGGCCTACTTACATGGCATGGATGCTACATTACTGGAGGA  
>HPV71\_Alpha\_12084981\_nt7092\_L1\_Tile|1  
CTCAGGCCATAACCTGTCAGAAAAACAGTCCTCCTCCTGCAGAAAAAAGGACCCCTATG  
>HPV71\_Alpha\_12084981\_nt7102\_L1\_Tile|2  
AACCTGTGCAAAAAACAGTCCTCCTCCTGCAGAAAAAAGGACCCCTATGCAGATCTTAC  
>HPV71\_Alpha\_12084981\_nt7107\_L1\_Tile|1  
GTCAGAAAAACAGTCCTCCTCCTGCAGAAAAAAGGACCCCTATGCAGATCTTACATTTT  
>HPV71\_Alpha\_12084981\_nt7237\_L1\_Tile|1  
GCAAGTGGCACCCGCTCGCGGCCTACTGCATTGTCCCGTAAAAGGGTTGCAGCATCTAC  
>HPV71\_Alpha\_12084981\_nt7257\_L1\_Tile|1  
GGCCTACTGCATTGTCCCGTAAAAGGGTTGCAGCATCTACCACATCCACCGCCCCCAAAC  
>HPV72\_Alpha\_1491683\_nt5899\_L1\_Tile|1  
GGCAGTTCTCGTCTACTAAGTGTAGGACATCCTTACTGTGCCATACCTCTCAACGGACAG  
>HPV72\_Alpha\_1491683\_nt5909\_L1\_Tile|1  
GTCTACTAAGTGTAGGACATCCTTACTGTGCCATACCTCTCAACGGACAGGGCAAAAAAA  
>HPV72\_Alpha\_1491683\_nt5914\_L1\_Tile|1  
CTAAGTGTAGGACATCCTTACTGTGCCATACCTCTCAACGGACAGGGCAAAAAAAACACC  
>HPV72\_Alpha\_1491683\_nt5919\_L1\_Tile|1  
TGTAGGACATCCTTACTGTGCCATACCTCTCAACGGACAGGGCAAAAAAAACACCATTCC  
>HPV72\_Alpha\_1491683\_nt6184\_L1\_Tile|1  
ACTTCCTTACTTGTGGCTGACAATTCTGACAGTCGGGACAATGTATCTGTTGACTACAAA  
>HPV72\_Alpha\_1491683\_nt6219\_L1\_Tile|1  
GGACAATGTATCTGTTGACTACAAACAGACCCAATTGCTTATTATAGGGTGCAAGCCTCC  
>HPV72\_Alpha\_1491683\_nt6229\_L1\_Tile|1  
TCTGTTGACTACAAACAGACCCAATTGCTTATTATAGGGTGCAAGCCTCCCATTGGTGAG  
>HPV72\_Alpha\_1491683\_nt6234\_L1\_Tile|1  
TGACTACAAACAGACCCAATTGCTTATTATAGGGTGCAAGCCTCCCATTGGTGAGCATTG  
>HPV72\_Alpha\_1491683\_nt6269\_L1\_Tile|1  
GCAAGCCTCCCATTGGTGAGCATTGGACCAAGGGCACTCCTTGTGCAGGCTCTAATTCTC  
>HPV72\_Alpha\_1491683\_nt6279\_L1\_Tile|1  
CATTGGTGAGCATTGGACCAAGGGCACTCCTTGTGCAGGCTCTAATTCTCAGCCAACTGA  
>HPV72\_Alpha\_1491683\_nt6284\_L1\_Tile|1  
GTGAGCATTGGACCAAGGGCACTCCTTGTGCAGGCTCTAATTCTCAGCCAACTGACTGCC  
>HPV72\_Alpha\_1491683\_nt6314\_L1\_Tile|1  
CAGGCTCTAATTCTCAGCCAACTGACTGCCCCCTTTAGAATTTACAAATTCCTACTATAC  
>HPV72\_Alpha\_1491683\_nt6564\_L1\_Tile|1  
TTTTTTTAAATAGGCAGGGCACAATGGGTGAGGCACTACCAGCCAGTTTATATCTTAAAGG  
>HPV72\_Alpha\_1491683\_nt6569\_L1\_Tile|1  
TTAATAGGCAGGGCACAATGGGTGAGGCACTACCAGCCAGTTTATATCTTAAAGGTGCCT  
>HPV72\_Alpha\_1491683\_nt6574\_L1\_Tile|1  
AGGCAGGGCACAATGGGTGAGGCACTACCAGCCAGTTTATATCTTAAAGGTGCCTCGGGT  
>HPV72\_Alpha\_1491683\_nt6579\_L1\_Tile|1  
GGGCACAATGGGTGAGGCACTACCAGCCAGTTTATATCTTAAAGGTGCCTCGGGTAGCGA



>HPV72\_Alpha\_1491683\_nt6584\_L1\_Tile|1  
CAATGGGTGAGGCACTACCAGCCAGTTTATATCTTAAAGGTGCCTCGGGTAGCGACAGGG  
>HPV72\_Alpha\_1491683\_nt6589\_L1\_Tile|1  
GGTGAGGCACTACCAGCCAGTTTATATCTTAAAGGTGCCTCGGGTAGCGACAGGGTGACA  
>HPV72\_Alpha\_1491683\_nt6614\_L1\_Tile|1  
ATCTTAAAGGTGCCTCGGGTAGCGACAGGGTGACACCTGGTAGTTATATTTATTCTCCCA  
>HPV72\_Alpha\_1491683\_nt6624\_L1\_Tile|1  
TGCCTCGGGTAGCGACAGGGTGACACCTGGTAGTTATATTTATTCTCCCACCCCCAGCGG  
>HPV72\_Alpha\_1491683\_nt6629\_L1\_Tile|1  
CGGGTAGCGACAGGGTGACACCTGGTAGTTATATTTATTCTCCCACCCCCAGCGGCTCTA  
>HPV72\_Alpha\_1491683\_nt6809\_L1\_Tile|1  
GTACTAATGTAAC TATTTGTACTGCCACAGCGTCCTCTGTATCAGAAATATACAGCTTCTA  
>HPV72\_Alpha\_1491683\_nt6814\_L1\_Tile|1  
AATGTAAC TATTTGTACTGCCACAGCGTCCTCTGTATCAGAAATATACAGCTTCTAATTTT  
>HPV72\_Alpha\_1491683\_nt6819\_L1\_Tile|1  
AACTATTTGTACTGCCACAGCGTCCTCTGTATCAGAAATATACAGCTTCTAATTTTTCGTGA  
>HPV72\_Alpha\_1491683\_nt6824\_L1\_Tile|1  
TTTGTACTGCCACAGCGTCCTCTGTATCAGAAATATACAGCTTCTAATTTTTCGTGAGTATC  
>HPV72\_Alpha\_1491683\_nt6844\_L1\_Tile|1  
TCTGTATCAGAAATATACAGCTTCTAATTTTTCGTGAGTATCTTCGCCACACTGAGGAATTT  
>HPV72\_Alpha\_1491683\_nt7069\_L1\_Tile|1  
ATTACCTGTCAAAAAGGGGGCTGCCACCCCTCCTCCTAAAGAAGATCCATATGCTAACTTA  
>HPV73\_Alpha\_1491692\_nt5595\_L1\_Tile|1  
ATGCAGGTAGCACACGTTTGTGGCTGTGGGACACCCATATTTTCCTATCAAGGATTCTC  
>HPV73\_Alpha\_1491692\_nt5600\_L1\_Tile|1  
GGTAGCACACGTTTGTGGCTGTGGGACACCCATATTTTCCTATCAAGGATTCTCAAAAA  
>HPV73\_Alpha\_1491692\_nt5610\_L1\_Tile|1  
GTTTGTGGCTGTGGGACACCCATATTTTCCTATCAAGGATTCTCAAAAAACGTAAAACCA  
>HPV73\_Alpha\_1491692\_nt5620\_L1\_Tile|1  
TGTGGGACACCCATATTTTCCTATCAAGGATTCTCAAAAAACGTAAAACCATAGTTCCTAA  
>HPV73\_Alpha\_1491692\_nt5625\_L1\_Tile|1  
GACACCCATATTTTCCTATCAAGGATTCTCAAAAAACGTAAAACCATAGTTCCTAAAGTTT  
>HPV73\_Alpha\_1491692\_nt5630\_L1\_Tile|1  
CCATATTTTCCTATCAAGGATTCTCAAAAAACGTAAAACCATAGTTCCTAAAGTTTCAGGT  
>HPV73\_Alpha\_1491692\_nt5850\_L1\_Tile|1  
CATTTATGAATAAATTAGATGATACTGAAAATGCTCCTAAATACATTGCTGGACAAAATA  
>HPV73\_Alpha\_1491692\_nt5860\_L1\_Tile|1  
TAAATTAGATGATACTGAAAATGCTCCTAAATACATTGCTGGACAAAATACAGATGGTAG  
>HPV73\_Alpha\_1491692\_nt5865\_L1\_Tile|1  
TAGATGATACTGAAAATGCTCCTAAATACATTGCTGGACAAAATACAGATGGTAGAGAAT  
>HPV73\_Alpha\_1491692\_nt5870\_L1\_Tile|1  
GATACTGAAAATGCTCCTAAATACATTGCTGGACAAAATACAGATGGTAGAGAATGTATG  
>HPV73\_Alpha\_1491692\_nt5875\_L1\_Tile|1  
TGAAAATGCTCCTAAATACATTGCTGGACAAAATACAGATGGTAGAGAATGTATGTCAGT  
>HPV73\_Alpha\_1491692\_nt5880\_L1\_Tile|1  
ATGCTCCTAAATACATTGCTGGACAAAATACAGATGGTAGAGAATGTATGTCAGTGGATT  
>HPV73\_Alpha\_1491692\_nt5885\_L1\_Tile|1  
CCTAAATACATTGCTGGACAAAATACAGATGGTAGAGAATGTATGTCAGTGGATTATAAA  
>HPV73\_Alpha\_1491692\_nt6010\_L1\_Tile|1  
ATGTACTTCACAACTGTTAATACTGGTGATTGTCCCCACTGGAATTAAAGAACACCCCC  
>HPV73\_Alpha\_1491692\_nt6015\_L1\_Tile|1  
CTTCACAAACTGTTAATACTGGTGATTGTCCCCACTGGAATTAAAGAACACCCCCTATAC  
>HPV73\_Alpha\_1491692\_nt6255\_L1\_Tile|1  
TTGTTTCGACACTTATTTAACAGGGCTGGTGATACCGGTGATAAAATCCCAGATGACCTAA  
>HPV73\_Alpha\_1491692\_nt6265\_L1\_Tile|1

CTTATTTAACAGGGCTGGTGATACCGGTGATAAAATCCCAGATGACCTAATGATTAAAGG  
>HPV73\_Alpha\_1491692\_nt6285\_L1\_Tile|1  
ATACCGGTGATAAAATCCCAGATGACCTAATGATTAAAGGCACAGGCAATACTGCAACAC  
>HPV73\_Alpha\_1491692\_nt6495\_L1\_Tile|1  
CTACTAGAAGCACTAATTTTTCTGTATGTGTAGGTACACAGGCTAGTAGCTCTACTACAA  
>HPV73\_Alpha\_1491692\_nt6500\_L1\_Tile|1  
AGAAGCACTAATTTTTCTGTATGTGTAGGTACACAGGCTAGTAGCTCTACTACAACGTAT  
>HPV73\_Alpha\_1491692\_nt6505\_L1\_Tile|1  
CACTAATTTTTCTGTATGTGTAGGTACACAGGCTAGTAGCTCTACTACAACGTATGCCAA  
>HPV73\_Alpha\_1491692\_nt6510\_L1\_Tile|1  
ATTTTTCTGTATGTGTAGGTACACAGGCTAGTAGCTCTACTACAACGTATGCCAACTCTA  
>HPV73\_Alpha\_1491692\_nt6515\_L1\_Tile|1  
TCTGTATGTGTAGGTACACAGGCTAGTAGCTCTACTACAACGTATGCCAACTCTAATTTT  
>HPV73\_Alpha\_1491692\_nt6520\_L1\_Tile|1  
ATGTGTAGGTACACAGGCTAGTAGCTCTACTACAACGTATGCCAACTCTAATTTTAAGGA  
>HPV73\_Alpha\_1491692\_nt6525\_L1\_Tile|1  
TAGGTACACAGGCTAGTAGCTCTACTACAACGTATGCCAACTCTAATTTTAAGGAATATT  
>HPV73\_Alpha\_1491692\_nt6920\_L1\_Tile|1  
GCACGTCCTAAGTTACAAGCTTCTAAACGTTCTGCATCTGCTACCACAAGTGCCACACCT  
>HPV73\_Alpha\_1491692\_nt6925\_L1\_Tile|1  
TCCTAAGTTACAAGCTTCTAAACGTTCTGCATCTGCTACCACAAGTGCCACACCTAAGAA  
>HPV74\_Alpha\_27462483\_nt5714\_L1\_Tile|1  
ACTTGCTGTAGGAAATCCCTATTTCCCTATAAAACAGGTTAACAAAACAGTTGTTCCCTAA  
>HPV74\_Alpha\_27462483\_nt5719\_L1\_Tile|1  
CTGTAGGAAATCCCTATTTCCCTATAAAACAGGTTAACAAAACAGTTGTTCCCTAAAGTGT  
>HPV74\_Alpha\_27462483\_nt5724\_L1\_Tile|1  
GGAAATCCCTATTTCCCTATAAAACAGGTTAACAAAACAGTTGTTCCCTAAAGTGTCTGGA  
>HPV74\_Alpha\_27462483\_nt6099\_L1\_Tile|1  
AAGCAATGTTCTAATGTTACTGTAAAGCCAGGCGATTGCCCTGCATTAGAATTAATTACT  
>HPV74\_Alpha\_27462483\_nt6104\_L1\_Tile|1  
ATGTTCTAATGTTACTGTAAAGCCAGGCGATTGCCCTGCATTAGAATTAATTACTAGTGT  
>HPV74\_Alpha\_27462483\_nt6109\_L1\_Tile|1  
CTAATGTTACTGTAAAGCCAGGCGATTGCCCTGCATTAGAATTAATTACTAGTGTAAATTC  
>HPV74\_Alpha\_27462483\_nt6374\_L1\_Tile|1  
TGGAACAGTGGGTGAGGACATTCCCCAGGACCTATATATTAAGGGTACTACACGTGGTAC  
>HPV74\_Alpha\_27462483\_nt6399\_L1\_Tile|1  
CAGGACCTATATATTAAGGGTACTACACGTGGTACACTTGCCAATGCTATTTACTTTAAT  
>HPV74\_Alpha\_27462483\_nt6404\_L1\_Tile|1  
CCTATATATTAAGGGTACTACACGTGGTACACTTGCCAATGCTATTTACTTTAATACCCC  
>HPV74\_Alpha\_27462483\_nt6594\_L1\_Tile|1  
AGTACTAACATGACAGTGTGTGCGCCTACTACACAATCCCCTCCTGCTGCTACATATACT  
>HPV74\_Alpha\_27462483\_nt6599\_L1\_Tile|1  
TAACATGACAGTGTGTGCGCCTACTACACAATCCCCTCCTGCTGCTACATATACTAGTAC  
>HPV74\_Alpha\_27462483\_nt6604\_L1\_Tile|1  
TGACAGTGTGTGCGCCTACTACACAATCCCCTCCTGCTGCTACATATACTAGTACAGACT  
>HPV74\_Alpha\_27462483\_nt6609\_L1\_Tile|1  
GTGTGTGCGCCTACTACACAATCCCCTCCTGCTGCTACATATACTAGTACAGACTACAAA  
>HPV74\_Alpha\_27462483\_nt6619\_L1\_Tile|1  
CTACTACACAATCCCCTCCTGCTGCTACATATACTAGTACAGACTACAAACAATACATGA  
>HPV74\_Alpha\_27462483\_nt6624\_L1\_Tile|1  
ACACAATCCCCTCCTGCTGCTACATATACTAGTACAGACTACAAACAATACATGAGACAT  
>HPV74\_Alpha\_27462483\_nt7014\_L1\_Tile|1  
CGCTCTTCGGTTTCGTGTAGGTAAAAAGCGTTCGGCCCCTACAGCCCCCTCCTCAACCACT  
>HPV74\_Alpha\_27462483\_nt7029\_L1\_Tile|1  
GTAGGTAAAAAGCGTTCGGCCCCTACAGCCCCCTCCTCAACCACTAAACAGAAACGCTCT

>HPV74\_Alpha\_27462483\_nt7034\_L1\_Tile|1  
TAAAAAGCGTTCGGCCCCCTACAGCCCCCTCCTCAACCACTAAACAGAAACGCTCTAGGAA  
>HPV74\_Alpha\_27462483\_nt7041\_L1\_Tile|1  
CGTTCGGCCCCCTACAGCCCCCTCCTCAACCACTAAACAGAAACGCTCTAGGAAACGATAG  
>HPV75\_Beta\_2911544\_nt6142\_L1\_Tile|2  
CTTTGTTCAATAAAGTAAAGGATACTGAAAATTCAAATAATTATATAACAATGTCTAAAG  
>HPV75\_Beta\_2911544\_nt7112\_L1\_Tile|1  
AAAGAAAAGATCCTTATGAGCAATATACTTTCTGGCCTGTGGATCTAACTGAAAAATTATC  
>HPV75\_Beta\_2911544\_nt7122\_L1\_Tile|2  
CCTTATGAGCAATATACTTTCTGGCCTGTGGATCTAACTGAAAAATTATCGTTGGATTTG  
>HPV75\_Beta\_2911544\_nt7187\_L1\_Tile|1  
ATACTCGTTAGGACGCAAATTCCTTTTTTCAGGCAGGCTTACGAAGGGCTTCCAAGGTAAC  
>HPV75\_Beta\_2911544\_nt7192\_L1\_Tile|1  
CGTTAGGACGCAAATTCCTTTTTTCAGGCAGGCTTACGAAGGGCTTCCAAGGTAACCAGAA  
>HPV76\_Beta\_2911551\_nt6035\_L1\_Tile|1  
TACTACCAGATCCCAATAGATTTCGCCTTGGTAGACATGAATGTCTATAATCCTGAGAAGG  
>HPV76\_Beta\_2911551\_nt6045\_L1\_Tile|1  
TCCCAATAGATTTCGCCTTGGTAGACATGAATGTCTATAATCCTGAGAAGGAAAGACTGGT  
>HPV76\_Beta\_2911551\_nt6050\_L1\_Tile|1  
ATAGATTTCGCCTTGGTAGACATGAATGTCTATAATCCTGAGAAGGAAAGACTGGTTTGGG  
>HPV76\_Beta\_2911551\_nt6330\_L1\_Tile|1  
TGATGCTGACAGAGGGGTAGGCAAATGTCCACCTTTGGAAGTGGTAAATACTGTAATAGA  
>HPV76\_Beta\_2911551\_nt6335\_L1\_Tile|1  
CTGACAGAGGGGTAGGCAAATGTCCACCTTTGGAAGTGGTAAATACTGTAATAGAAGATG  
>HPV76\_Beta\_2911551\_nt6340\_L1\_Tile|1  
AGAGGGGTAGGCAAATGTCCACCTTTGGAAGTGGTAAATACTGTAATAGAAGATGGAGAT  
>HPV76\_Beta\_2911551\_nt7145\_L1\_Tile|1  
AGGATCCATATGAGCAATACAATTTTTGGCAAGTGGATCTAACTGAGAAATTGTCATTAG  
>HPV76\_Beta\_2911551\_nt7150\_L1\_Tile|1  
CCATATGAGCAATACAATTTTTGGCAAGTGGATCTAACTGAGAAATTGTCATTAGATTTG  
>HPV76\_Beta\_2911551\_nt7215\_L1\_Tile|1  
ATATTCCTTAGGACGCAAGTTTCTGTTTCAAGCAGGCCTGCGACGGGCTTCCAGAGTATC  
>HPV77\_Alpha\_2911558\_nt5914\_L1\_Tile|1  
TGTTAACTGTAGGTCATCCCTATTTTGCTATTCCCAAACCTTCTGGTACTAAGGTGGATG  
>HPV77\_Alpha\_2911558\_nt6284\_L1\_Tile|1  
GGGGGAATACTGGGGTAAGGGTACCCCTTGTGCACGTACTAATACTACCCCAGGAGACTG  
>HPV77\_Alpha\_2911558\_nt6289\_L1\_Tile|1  
AATACTGGGGTAAGGGTACCCCTTGTGCACGTACTAATACTACCCCAGGAGACTGTCCTC  
>HPV77\_Alpha\_2911558\_nt6304\_L1\_Tile|1  
GTACCCCTTGTGCACGTACTAATACTACCCCAGGAGACTGTCCTCCCTTGGAGTTAATGA  
>HPV77\_Alpha\_2911558\_nt6309\_L1\_Tile|1  
CCTTGTGCACGTACTAATACTACCCCAGGAGACTGTCCTCCCTTGGAGTTAATGACATCT  
>HPV77\_Alpha\_2911558\_nt6319\_L1\_Tile|1  
GTACTAATACTACCCCAGGAGACTGTCCTCCCTTGGAGTTAATGACATCTTATATTCAGG  
>HPV77\_Alpha\_2911558\_nt6564\_L1\_Tile|1  
CACTTTTTCAATCGTGCGGGTGATGTTGGAGACAAAATTCCAGAATCTTTGTACCTCAAA  
>HPV77\_Alpha\_2911558\_nt6569\_L1\_Tile|1  
TTTCAATCGTGCGGGTGATGTTGGAGACAAAATTCCAGAATCTTTGTACCTCAAAGGGAG  
>HPV77\_Alpha\_2911558\_nt6574\_L1\_Tile|1  
ATCGTGCGGGTGATGTTGGAGACAAAATTCCAGAATCTTTGTACCTCAAAGGGAGTAGCG  
>HPV77\_Alpha\_2911558\_nt6579\_L1\_Tile|1  
GCGGGTGATGTTGGAGACAAAATTCCAGAATCTTTGTACCTCAAAGGGAGTAGCGGGCGT  
>HPV77\_Alpha\_2911558\_nt6584\_L1\_Tile|1  
TGATGTTGGAGACAAAATTCCAGAATCTTTGTACCTCAAAGGGAGTAGCGGGCGTGAGAC  
>HPV77\_Alpha\_2911558\_nt6589\_L1\_Tile|1

TTGGAGACAAAATTCAGAATCTTTGTACCTCAAAGGGAGTAGCGGGCGTGAGACTCCCG  
>HPV77\_Alpha\_2911558\_nt6594\_L1\_Tile|1  
GACAAAATTCAGAATCTTTGTACCTCAAAGGGAGTAGCGGGCGTGAGACTCCCGGCAGT  
>HPV77\_Alpha\_2911558\_nt6599\_L1\_Tile|1  
AATTCAGAATCTTTGTACCTCAAAGGGAGTAGCGGGCGTGAGACTCCCGGCAGTGCTAT  
>HPV77\_Alpha\_2911558\_nt6604\_L1\_Tile|1  
CAGAATCTTTGTACCTCAAAGGGAGTAGCGGGCGTGAGACTCCCGGCAGTGCTATATACA  
>HPV77\_Alpha\_2911558\_nt6804\_L1\_Tile|1  
AGCACAAATATGTCTCTCAGTGCCTCCACTGAGTCTCAAACCCCATCTACCTATGATGCC  
>HPV77\_Alpha\_2911558\_nt6809\_L1\_Tile|1  
AAATATGTCTCTCAGTGCCTCCACTGAGTCTCAAACCCCATCTACCTATGATGCCACTAA  
>HPV77\_Alpha\_2911558\_nt6814\_L1\_Tile|1  
TGTCTCTCAGTGCCTCCACTGAGTCTCAAACCCCATCTACCTATGATGCCACTAAAATAA  
>HPV77\_Alpha\_2911558\_nt6819\_L1\_Tile|1  
CTCAGTGCCTCCACTGAGTCTCAAACCCCATCTACCTATGATGCCACTAAAATAAAGGAA  
>HPV77\_Alpha\_2911558\_nt7229\_L1\_Tile|1  
GGTTCCCTCTCGCAAACGCCGGCGCCACCCCTCCCCAGCTTCGACCAAACGGAAGCG  
>HPV77\_Alpha\_2911558\_nt7242\_L1\_Tile|2  
AAACGCCGGCGCCACCCCTCCCCAGCTTCGACCAAACGGAAGCGCTCCAAAAGTGA  
>HPV80\_Beta\_2911565\_nt6084\_L1\_Tile|1  
TTTATTTAATAAAGTTAAGGACACAGAAAATAATAGTGGCTACCAGGGAGGTTCTACTGA  
>HPV80\_Beta\_2911565\_nt6089\_L1\_Tile|1  
TTAATAAAGTTAAGGACACAGAAAATAATAGTGGCTACCAGGGAGGTTCTACTGATGACA  
>HPV80\_Beta\_2911565\_nt6094\_L1\_Tile|1  
AAAGTTAAGGACACAGAAAATAATAGTGGCTACCAGGGAGGTTCTACTGATGACAGACAG  
>HPV80\_Beta\_2911565\_nt6099\_L1\_Tile|1  
TAAGGACACAGAAAATAATAGTGGCTACCAGGGAGGTTCTACTGATGACAGACAGAATAC  
>HPV80\_Beta\_2911565\_nt6249\_L1\_Tile|1  
AGAAGAAAATAACCAAGCTGGAAAATGTCTCCATTAGAACTTAAAAATACTGTGATTGA  
>HPV80\_Beta\_2911565\_nt6579\_L1\_Tile|1  
ACAAACAGGCCAGCAACAACGTGTTTTAGCAAATTCACATATTTTCCTACTGTTAGTGG  
>HPV80\_Beta\_2911565\_nt6589\_L1\_Tile|1  
CAGCAACAACGTGTTTTAGCAAATTCACATATTTTCCTACTGTTAGTGGCTCTTTAGTA  
>HPV80\_Beta\_2911565\_nt6594\_L1\_Tile|1  
ACAACGTGTTTTAGCAAATTCACATATTTTCCTACTGTTAGTGGCTCTTTAGTAACTTC  
>HPV80\_Beta\_2911565\_nt6734\_L1\_Tile|1  
TGTTTATTACTGTTGCTGATAATACAAGAAACACTAATTTACCATAAGTGTTACTTCTG  
>HPV80\_Beta\_2911565\_nt6744\_L1\_Tile|1  
TGTTGCTGATAATACAAGAAACACTAATTTACCATAAGTGTTACTTCTGATGGTAGTAC  
>HPV80\_Beta\_2911565\_nt6749\_L1\_Tile|1  
CTGATAATACAAGAAACACTAATTTACCATAAGTGTTACTTCTGATGGTAGTACTATAA  
>HPV80\_Beta\_2911565\_nt6754\_L1\_Tile|1  
AATACAAGAAACACTAATTTACCATAAGTGTTACTTCTGATGGTAGTACTATAACTGAA  
>HPV80\_Beta\_2911565\_nt6769\_L1\_Tile|1  
AATTTACCATAAGTGTTACTTCTGATGGTAGTACTATAACTGAATATAATACACAAAAT  
>HPV80\_Beta\_2911565\_nt6774\_L1\_Tile|1  
CACCATAAGTGTTACTTCTGATGGTAGTACTATAACTGAATATAATACACAAAATATTAG  
>HPV80\_Beta\_2911565\_nt7139\_L1\_Tile|1  
CTTTAGGAAGGAAATTTATATTTTCAGGCAGGTTTACAAAGACGTCCCAAACCATCAGAT  
>HPV80\_Beta\_2911565\_nt7144\_L1\_Tile|1  
GGAAGGAAATTTATATTTTCAGGCAGGTTTACAAAGACGTCCCAAACCATCAGATCTTCT  
>HPV80\_Beta\_2911565\_nt7149\_L1\_Tile|1  
GAAATTTATATTTTCAGGCAGGTTTACAAAGACGTCCCAAACCATCAGATCTTCTGTAAA  
>HPV80\_Beta\_2911565\_nt7154\_L1\_Tile|1  
TTATATTTTCAGGCAGGTTTACAAAGACGTCCCAAACCATCAGATCTTCTGTAAAAGTTT

>HPV81\_Alpha\_40804509\_nt5775\_L1\_Tile|1  
ATGTTGTTGGCACTGATTTTTACTTGTTCCTTCTTATATATTCTTCCCTAAAAACATA  
>HPV81\_Alpha\_40804509\_nt5780\_L1\_Tile|1  
GTTGGCACTGATTTTTACTTGTTCCTTCTTATATATTCTTCCCTAAAAACATAAACGT  
>HPV81\_Alpha\_40804509\_nt5985\_L1\_Tile|1  
CTTACTGTAGGCATCCATATTGTACATTAAC TATTGGTACCCAAGGAAAGCGTTCCACT  
>HPV81\_Alpha\_40804509\_nt5990\_L1\_Tile|1  
TGTAGGGCATCCATATTGTACATTAAC TATTGGTACCCAAGGAAAGCGTTCCACTATTCC  
>HPV81\_Alpha\_40804509\_nt5995\_L1\_Tile|1  
GGCATCCATATTGTACATTAAC TATTGGTACCCAAGGAAAGCGTTCCACTATTCCCAAGG  
>HPV81\_Alpha\_40804509\_nt6275\_L1\_Tile|1  
CAGTGAGGACAGTCGTGACAATATTT CAGTTGATTATAAGCAAACACAATTATTAATTAT  
>HPV81\_Alpha\_40804509\_nt6355\_L1\_Tile|1  
GGGAGCACTGGGCCCCGGGTACCTTTTGTGCTAATGTTGCTCCAGCACAAAACGAATGCC  
>HPV81\_Alpha\_40804509\_nt6370\_L1\_Tile|1  
GGGGTACCTTTTGTGCTAATGTTGCTCCAGCACAAAACGAATGCCCCCCTTGGAGTTTA  
>HPV81\_Alpha\_40804509\_nt6375\_L1\_Tile|1  
ACCTTTTGTGCTAATGTTGCTCCAGCACAAAACGAATGCCCCCCTTGGAGTTTAAAAAT  
>HPV81\_Alpha\_40804509\_nt6380\_L1\_Tile|1  
TTGTGCTAATGTTGCTCCAGCACAAAACGAATGCCCCCCTTGGAGTTTAAAAATACAAC  
>HPV81\_Alpha\_40804509\_nt6675\_L1\_Tile|1  
GCAGACTTATATATGAAGGGTGCTGCAGGCAGTGACAGAATAACCCCCGGGAGTTATATT  
>HPV81\_Alpha\_40804509\_nt6870\_L1\_Tile|1  
ACTACCAGAAGCACCAATTTTACTATTTGCACAGCTACATCTGCTGCTGCAGAATACAAG  
>HPV82\_Alpha\_6970427\_nt5927\_L1\_Tile|1  
ATCCTTTATTTAATAAGTATGATGATACTGAAAAC TCTAGGTTTGCCAATGGCAACGACC  
>HPV82\_Alpha\_6970427\_nt5932\_L1\_Tile|1  
TTATTTAATAAGTATGATGATACTGAAAAC TCTAGGTTTGCCAATGGCAACGACCAACAG  
>HPV82\_Alpha\_6970427\_nt5937\_L1\_Tile|1  
TAATAAGTATGATGATACTGAAAAC TCTAGGTTTGCCAATGGCAACGACCAACAGGATGT  
>HPV82\_Alpha\_6970427\_nt5942\_L1\_Tile|2  
AGTATGATGATACTGAAAAC TCTAGGTTTGCCAATGGCAACGACCAACAGGATGTTAGGG  
>HPV82\_Alpha\_6970427\_nt5947\_L1\_Tile|1  
GATGATACTGAAAAC TCTAGGTTTGCCAATGGCAACGACCAACAGGATGTTAGGGACAAC  
>HPV82\_Alpha\_6970427\_nt5952\_L1\_Tile|1  
TACTGAAAAC TCTAGGTTTGCCAATGGCAACGACCAACAGGATGTTAGGGACAACATATC  
>HPV82\_Alpha\_6970427\_nt5957\_L1\_Tile|1  
AAAAC TCTAGGTTTGCCAATGGCAACGACCAACAGGATGTTAGGGACAACATATCTGTGG  
>HPV82\_Alpha\_6970427\_nt5962\_L1\_Tile|2  
TCTAGGTTTGCCAATGGCAACGACCAACAGGATGTTAGGGACAACATATCTGTGGACAAC  
>HPV82\_Alpha\_6970427\_nt6187\_L1\_Tile|1  
GCCATGGATTTTGCTAATTTACAAGCTACTAAATCAGATGTTCCATTGGATATTGCTCAG  
>HPV82\_Alpha\_6970427\_nt6207\_L1\_Tile|1  
ACAAGCTACTAAATCAGATGTTCCATTGGATATTGCTCAGTCTGTGTGTAAATACCCTGA  
>HPV82\_Alpha\_6970427\_nt6322\_L1\_Tile|2  
AGGGAGCAAATATTTGCTAGGCATTACTATAATAAGGCTGGTGTGGTTGGTGATGCCATT  
>HPV82\_Alpha\_6970427\_nt6327\_L1\_Tile|1  
GCAAATATTTGCTAGGCATTACTATAATAAGGCTGGTGTGGTTGGTGATGCCATTCCAGA  
>HPV82\_Alpha\_6970427\_nt6337\_L1\_Tile|1  
GCTAGGCATTACTATAATAAGGCTGGTGTGGTTGGTGATGCCATTCCAGACAAGGCTTAT  
>HPV82\_Alpha\_6970427\_nt6352\_L1\_Tile|1  
AATAAGGCTGGTGTGGTTGGTGATGCCATTCCAGACAAGGCTTATATTAAGGGTACTGGT  
>HPV82\_Alpha\_6970427\_nt6372\_L1\_Tile|1  
TGATGCCATTCCAGACAAGGCTTATATTAAGGGTACTGGTGCTGGCCGCGACCCTATTAG  
>HPV82\_Alpha\_6970427\_nt6562\_L1\_Tile|2

ATTACTTGTGTTGACACTACTAAAAGTACCAATTTAACCATTAGCACTGCTGTTACTCCA  
>HPV82\_Alpha\_6970427\_nt6567\_L1\_Tile|1  
TTGTGTTGACACTACTAAAAGTACCAATTTAACCATTAGCACTGCTGTTACTCCATCTGT  
>HPV82\_Alpha\_6970427\_nt6572\_L1\_Tile|1  
TTGACACTACTAAAAGTACCAATTTAACCATTAGCACTGCTGTTACTCCATCTGTTGCAC  
>HPV82\_Alpha\_6970427\_nt6577\_L1\_Tile|1  
ACTACTAAAAGTACCAATTTAACCATTAGCACTGCTGTTACTCCATCTGTTGCACAAACA  
>HPV82\_Alpha\_6970427\_nt6582\_L1\_Tile|2  
TAAAAGTACCAATTTAACCATTAGCACTGCTGTTACTCCATCTGTTGCACAAACATTTAC  
>HPV82\_Alpha\_6970427\_nt6587\_L1\_Tile|1  
GTACCAATTTAACCATTAGCACTGCTGTTACTCCATCTGTTGCACAAACATTTACTCCAG  
>HPV82\_Alpha\_6970427\_nt6592\_L1\_Tile|1  
AATTTAACCATTAGCACTGCTGTTACTCCATCTGTTGCACAAACATTTACTCCAGCAAAC  
>HPV82\_Alpha\_6970427\_nt6597\_L1\_Tile|1  
AACCATTAGCACTGCTGTTACTCCATCTGTTGCACAAACATTTACTCCAGCAAACTTTAA  
>HPV82\_Alpha\_6970427\_nt6607\_L1\_Tile|1  
ACTGCTGTTACTCCATCTGTTGCACAAACATTTACTCCAGCAAACTTTAAAGCAGTACATT  
>HPV82\_Alpha\_6970427\_nt6612\_L1\_Tile|1  
TGTTACTCCATCTGTTGCACAAACATTTACTCCAGCAAACTTTAAAGCAGTACATTAGGCA  
>HPV82\_Alpha\_6970427\_nt6702\_L1\_Tile|2  
TCAATTGTGTAAAATCACTTTAACTACTGAAATTATGGCTTACCTGCACACCATGGATTTC  
>HPV82\_Alpha\_6970427\_nt6707\_L1\_Tile|1  
TGTGTAAAATCACTTTAACTACTGAAATTATGGCTTACCTGCACACCATGGATTCTACAA  
>HPV82\_Alpha\_6970427\_nt6712\_L1\_Tile|1  
AAAATCACTTTAACTACTGAAATTATGGCTTACCTGCACACCATGGATTCTACAATTTTA  
>HPV82\_Alpha\_6970427\_nt6717\_L1\_Tile|1  
CACTTTAACTACTGAAATTATGGCTTACCTGCACACCATGGATTCTACAATTTTAGAACA  
>HPV82\_Alpha\_6970427\_nt6722\_L1\_Tile|2  
TAACTACTGAAATTATGGCTTACCTGCACACCATGGATTCTACAATTTTAGAACAGTGGA  
>HPV82\_Alpha\_6970427\_nt6792\_L1\_Tile|1  
AACATTGCCCCCTCCGCTAGTTTGGAGGATGCCTATCGATTTGTAAAAAATGCAGCAAC  
>HPV82\_Alpha\_6970427\_nt6882\_L1\_Tile|2  
TAAAGAAGACCCTTTGGCAAATATAAATTTTGGGAATGTAGACCTTAAGGAACGCTTTTC  
>HPV83\_Alpha\_5059324\_nt5868\_L1\_Tile|1  
TCTTACCGTAGGACATCCATATTATCCTGTACAGGTTAATGGTCAAGGAAAAAAGCCAC  
>HPV83\_Alpha\_5059324\_nt5873\_L1\_Tile|1  
CCGTAGGACATCCATATTATCCTGTACAGGTTAATGGTCAAGGAAAAAAGCCACTATCC  
>HPV83\_Alpha\_5059324\_nt5878\_L1\_Tile|1  
GGACATCCATATTATCCTGTACAGGTTAATGGTCAAGGAAAAAAGCCACTATCCCCAAG  
>HPV83\_Alpha\_5059324\_nt6158\_L1\_Tile|1  
CAGACACAGATAGGCGTGACAATGTCTCAGTGGATTACAAACAAACGCAGCTTATTATCA  
>HPV83\_Alpha\_5059324\_nt6163\_L1\_Tile|1  
ACAGATAGGCGTGACAATGTCTCAGTGGATTACAAACAAACGCAGCTTATTATCATTGGG  
>HPV83\_Alpha\_5059324\_nt6168\_L1\_Tile|1  
TAGGCGTGACAATGTCTCAGTGGATTACAAACAAACGCAGCTTATTATCATTGGGTGTAA  
>HPV83\_Alpha\_5059324\_nt6178\_L1\_Tile|1  
AATGTCTCAGTGGATTACAAACAAACGCAGCTTATTATCATTGGGTGTAAGCCCCCAATA  
>HPV83\_Alpha\_5059324\_nt6528\_L1\_Tile|1  
TAGGCATGGCACTATGGGCGAGGTGCTGCCTACCTCTTATTATATTCCAGGCACATCTGC  
>HPV83\_Alpha\_5059324\_nt6533\_L1\_Tile|1  
ATGGCACTATGGGCGAGGTGCTGCCTACCTCTTATTATATTCCAGGCACATCTGCTAATA  
>HPV83\_Alpha\_5059324\_nt6538\_L1\_Tile|1  
ACTATGGGCGAGGTGCTGCCTACCTCTTATTATATTCCAGGCACATCTGCTAATAGTAGG  
>HPV83\_Alpha\_5059324\_nt6543\_L1\_Tile|1  
GGGCGAGGTGCTGCCTACCTCTTATTATATTCCAGGCACATCTGCTAATAGTAGGAACAC

>HPV83\_Alpha\_5059324\_nt6548\_L1\_Tile|1  
AGGTGCTGCCTACCTCTTATTATATTCCAGGCACATCTGCTAATAGTAGGAACACTCTTA  
>HPV83\_Alpha\_5059324\_nt6553\_L1\_Tile|1  
CTGCCTACCTCTTATTATATTCCAGGCACATCTGCTAATAGTAGGAACACTCTTACCAGC  
>HPV83\_Alpha\_5059324\_nt6558\_L1\_Tile|1  
TACCTCTTATTATATTCCAGGCACATCTGCTAATAGTAGGAACACTCTTACCAGCTACAT  
>HPV83\_Alpha\_5059324\_nt6563\_L1\_Tile|1  
CTTATTATATTCCAGGCACATCTGCTAATAGTAGGAACACTCTTACCAGCTACATCTATG  
>HPV83\_Alpha\_5059324\_nt6573\_L1\_Tile|1  
TCCAGGCACATCTGCTAATAGTAGGAACACTCTTACCAGCTACATCTATGCTCCTACTCC  
>HPV83\_Alpha\_5059324\_nt6583\_L1\_Tile|1  
TCTGCTAATAGTAGGAACACTCTTACCAGCTACATCTATGCTCCTACTCCTAGTGGCTCC  
>HPV83\_Alpha\_5059324\_nt6593\_L1\_Tile|1  
GTAGGAACACTCTTACCAGCTACATCTATGCTCCTACTCCTAGTGGCTCCCTGGTATCGT  
>HPV83\_Alpha\_5059324\_nt6598\_L1\_Tile|1  
AACACTCTTACCAGCTACATCTATGCTCCTACTCCTAGTGGCTCCCTGGTATCGTCCGAT  
>HPV83\_Alpha\_5059324\_nt6838\_L1\_Tile|1  
CGCCACACAGAGGAATATGACTTACAGGTTATATTGCAACTTTGCAAAATACATCTGACC  
>HPV83\_Alpha\_5059324\_nt6843\_L1\_Tile|1  
CACAGAGGAATATGACTTACAGGTTATATTGCAACTTTGCAAAATACATCTGACCCCTGA  
>HPV83\_Alpha\_5059324\_nt6858\_L1\_Tile|1  
CTTACAGGTTATATTGCAACTTTGCAAAATACATCTGACCCCTGAAATTATGGCATACT  
>HPV83\_Alpha\_5059324\_nt7108\_L1\_Tile|1  
AAACTATCCACAGATTTAGATCAGTTTCCTTTGGGCCGTAAGTTTCTTTTGCAACTGGGT  
>HPV84\_Alpha\_12958167\_nt6196\_L1\_Tile|1  
ATGTACTAATGTGCAATATCGTGCGGGTGATTGCCCCCCTTTGCAGTTCACCTAATTCTAC  
>HPV84\_Alpha\_12958167\_nt6201\_L1\_Tile|1  
CTAATGTGCAATATCGTGCGGGTGATTGCCCCCCTTTGCAGTTCACCTAATTCTACCATTG  
>HPV84\_Alpha\_12958167\_nt6466\_L1\_Tile|1  
GGGTACTATGGGTGAGGAGGTGCCTCAGTCTTTTTTACCTTAAGGGGACCTCCTCCCGGGC  
>HPV84\_Alpha\_12958167\_nt6471\_L1\_Tile|1  
CTATGGGTGAGGAGGTGCCTCAGTCTTTTTTACCTTAAGGGGACCTCCTCCCGGGCAACCC  
>HPV84\_Alpha\_12958167\_nt6481\_L1\_Tile|1  
GGAGGTGCCTCAGTCTTTTTTACCTTAAGGGGACCTCCTCCCGGGCAACCCCTTAGCAGTTC  
>HPV84\_Alpha\_12958167\_nt6486\_L1\_Tile|1  
TGCCTCAGTCTTTTTTACCTTAAGGGGACCTCCTCCCGGGCAACCCCTTAGCAGTTCCTGTGT  
>HPV84\_Alpha\_12958167\_nt6691\_L1\_Tile|1  
CACCAATTTTACTATTAGTGCTGCTACCAACACCGAATCAGAATATAAACCTACCAATTT  
>HPV84\_Alpha\_12958167\_nt6696\_L1\_Tile|1  
ATTTTACTATTAGTGCTGCTACCAACACCGAATCAGAATATAAACCTACCAATTTTAAGG  
>HPV84\_Alpha\_12958167\_nt6701\_L1\_Tile|1  
ACTATTAGTGCTGCTACCAACACCGAATCAGAATATAAACCTACCAATTTTAAGGAATAC  
>HPV84\_Alpha\_12958167\_nt7076\_L1\_Tile|1  
TTTTTATTGCAGTCTGCCCCACGTTCCACCCCTGGTGTCCCGTAAACGTACAGCGTCTGCC  
>HPV84\_Alpha\_12958167\_nt7111\_L1\_Tile|1  
GTCCCGTAAACGTACAGCGTCTGCCTCTACCCCCCTGCCTCCAAACGGCGTAAGGCCAA  
>HPV84\_Alpha\_12958167\_nt7116\_L1\_Tile|1  
GTAAACGTACAGCGTCTGCCTCTACCCCCCTGCCTCCAAACGGCGTAAGGCCAAAAAGT  
>HPV84\_Alpha\_12958167\_nt7118\_L1\_Tile|1  
AAACGTACAGCGTCTGCCTCTACCCCCCTGCCTCCAAACGGCGTAAGGCCAAAAAGTAA  
>HPVcand85\_Alpha\_4574720\_nt5721\_L1\_Tile|1  
TGGCAGCTCTAGGCTTCTAACCGTTGGACATCCATACTATAAAGTTACCTCAAATGGAGG  
>HPVcand85\_Alpha\_4574720\_nt5736\_L1\_Tile|1  
TCTAACCGTTGGACATCCATACTATAAAGTTACCTCAAATGGAGGCCGCAAGCAAGACAT  
>HPVcand85\_Alpha\_4574720\_nt5966\_L1\_Tile|1

GTCATCCCTTTTACAACAAATTGGATGACACAGAAAATTCCCATGTTGCTACTTCTGTAG  
>HPVcand85\_Alpha\_4574720\_nt5971\_L1\_Tile|1  
CCCTTTTACAACAAATTGGATGACACAGAAAATTCCCATGTTGCTACTTCTGTAGTTACA  
>HPVcand85\_Alpha\_4574720\_nt5976\_L1\_Tile|1  
TTACAACAAATTGGATGACACAGAAAATTCCCATGTTGCTACTTCTGTAGTTACACACGA  
>HPVcand85\_Alpha\_4574720\_nt5981\_L1\_Tile|1  
ACAAATTGGATGACACAGAAAATTCCCATGTTGCTACTTCTGTAGTTACACACGACACTA  
>HPVcand85\_Alpha\_4574720\_nt5986\_L1\_Tile|1  
TTGGATGACACAGAAAATTCCCATGTTGCTACTTCTGTAGTTACACACGACACTAGAGAT  
>HPVcand85\_Alpha\_4574720\_nt6001\_L1\_Tile|1  
AATTCCCATGTTGCTACTTCTGTAGTTACACACGACACTAGAGATAATGTGTCAGTGGAT  
>HPVcand85\_Alpha\_4574720\_nt6131\_L1\_Tile|1  
CCTGTAAGCCCGGTGCTGTGCAAACAGGTGACTGTCCTCCATTAGAACTAGTAAATACAC  
>HPVcand85\_Alpha\_4574720\_nt6136\_L1\_Tile|1  
AAGCCCGGTGCTGTGCAAACAGGTGACTGTCCTCCATTAGAACTAGTAAATACACCTATT  
>HPVcand85\_Alpha\_4574720\_nt6376\_L1\_Tile|1  
TTTGCACGCCATTTTGGAAACAGGGGAGGCACTATAGGAGATGCAGTACCGGAAACATTA  
>HPVcand85\_Alpha\_4574720\_nt6381\_L1\_Tile|1  
ACGCCATTTTGGAAACAGGGGAGGCACTATAGGAGATGCAGTACCGGAAACATTATATAT  
>HPVcand85\_Alpha\_4574720\_nt6386\_L1\_Tile|1  
ATTTTTGGAAACAGGGGAGGCACTATAGGAGATGCAGTACCGGAAACATTATATATAAAAG  
>HPVcand85\_Alpha\_4574720\_nt6391\_L1\_Tile|1  
TGGAACAGGGGAGGCACTATAGGAGATGCAGTACCGGAAACATTATATATAAAAGGTACT  
>HPVcand85\_Alpha\_4574720\_nt6396\_L1\_Tile|1  
CAGGGGAGGCACTATAGGAGATGCAGTACCGGAAACATTATATATAAAAGGTACTAATGA  
>HPVcand85\_Alpha\_4574720\_nt6401\_L1\_Tile|1  
GAGGCACTATAGGAGATGCAGTACCGGAAACATTATATATAAAAGGTACTAATGATAGGG  
>HPVcand85\_Alpha\_4574720\_nt6406\_L1\_Tile|1  
ACTATAGGAGATGCAGTACCGGAAACATTATATATAAAAGGTACTAATGATAGGGCAACA  
>HPVcand85\_Alpha\_4574720\_nt6411\_L1\_Tile|1  
AGGAGATGCAGTACCGGAAACATTATATATAAAAGGTACTAATGATAGGGCAACACCTGG  
>HPVcand85\_Alpha\_4574720\_nt6416\_L1\_Tile|1  
ATGCAGTACCGGAAACATTATATATAAAAGGTACTAATGATAGGGCAACACCTGGAAGCT  
>HPVcand85\_Alpha\_4574720\_nt6421\_L1\_Tile|1  
GTACCGGAAACATTATATATAAAAGGTACTAATGATAGGGCAACACCTGGAAGCTGTATT  
>HPVcand85\_Alpha\_4574720\_nt6426\_L1\_Tile|1  
GGAAACATTATATATAAAAGGTACTAATGATAGGGCAACACCTGGAAGCTGTATTTATTC  
>HPVcand85\_Alpha\_4574720\_nt6431\_L1\_Tile|1  
CATTATATATAAAAGGTACTAATGATAGGGCAACACCTGGAAGCTGTATTTATTCTCCAT  
>HPVcand85\_Alpha\_4574720\_nt6436\_L1\_Tile|1  
TATATAAAAGGTACTAATGATAGGGCAACACCTGGAAGCTGTATTTATTCTCCATCACCT  
>HPVcand85\_Alpha\_4574720\_nt6441\_L1\_Tile|1  
AAAAGGTACTAATGATAGGGCAACACCTGGAAGCTGTATTTATTCTCCATCACCTAGTGG  
>HPVcand85\_Alpha\_4574720\_nt6446\_L1\_Tile|1  
GTACTAATGATAGGGCAACACCTGGAAGCTGTATTTATTCTCCATCACCTAGTGGGTCTA  
>HPVcand85\_Alpha\_4574720\_nt6586\_L1\_Tile|1  
CACAACCAATTATTTATAACTGTGGTAGACACAACACGTAGTACCAATCTTACCTTATCT  
>HPVcand85\_Alpha\_4574720\_nt6606\_L1\_Tile|1  
TGTGGTAGACACAACACGTAGTACCAATCTTACCTTATCTACTGCAACTACTAATCCAGT  
>HPVcand85\_Alpha\_4574720\_nt6611\_L1\_Tile|1  
TAGACACAACACGTAGTACCAATCTTACCTTATCTACTGCAACTACTAATCCAGTTCCAT  
>HPVcand85\_Alpha\_4574720\_nt6616\_L1\_Tile|1  
ACAACACGTAGTACCAATCTTACCTTATCTACTGCAACTACTAATCCAGTTCCATCTATA  
>HPVcand85\_Alpha\_4574720\_nt6621\_L1\_Tile|1  
ACGTAGTACCAATCTTACCTTATCTACTGCAACTACTAATCCAGTTCCATCTATATATGA



>HPVcand85\_Alpha\_4574720\_nt6661\_L1\_Tile|1  
CCAGTTCCATCTATATATGAACCTTCTAAATTTAAGGAATACACACGCCATGTAGAGGAA  
>HPVcand85\_Alpha\_4574720\_nt6741\_L1\_Tile|1  
TCAATTGTGTAAAATTACACTTACTACTGATGTTATGTCTTATATACATAACATGGATCC  
>HPVcand85\_Alpha\_4574720\_nt6746\_L1\_Tile|1  
TGTGTAAAATTACACTTACTACTGATGTTATGTCTTATATACATAACATGGATCCTACTA  
>HPVcand85\_Alpha\_4574720\_nt6751\_L1\_Tile|1  
AAAATTACACTTACTACTGATGTTATGTCTTATATACATAACATGGATCCTACTATTTTA  
>HPVcand85\_Alpha\_4574720\_nt6756\_L1\_Tile|1  
TACACTTACTACTGATGTTATGTCTTATATACATAACATGGATCCTACTATTTTAGATAG  
>HPVcand85\_Alpha\_4574720\_nt6761\_L1\_Tile|1  
TTACTACTGATGTTATGTCTTATATACATAACATGGATCCTACTATTTTAGATAGTTGGA  
>HPVcand85\_Alpha\_4574720\_nt6826\_L1\_Tile|1  
GGTGTAGTCCCTCCCCATCTGCTAGCTTAGTAGATACATATAGGTTTTTACAGTCATCT  
>HPVcand85\_Alpha\_4574720\_nt6886\_L1\_Tile|1  
GCCATTACATGTCAGAAGGATGTGGTTGTTCCACAAAAAAGGATCCATATGAAAAATTA  
>HPVcand85\_Alpha\_4574720\_nt6931\_L1\_Tile|1  
CCATATGAAAAATTAAAGTTTTGGAATGTGGATCTTAAAGAACATTTTTCATCTGATTTA  
>HPVcand85\_Alpha\_4574720\_nt7011\_L1\_Tile|1  
TAAGTTTTTATTACAGGCTGGGTTACGACCTAAACCCACCATAGGCCCTAGGAAACGTGT  
>HPVcand85\_Alpha\_4574720\_nt7026\_L1\_Tile|1  
GGCTGGGTTACGACCTAAACCCACCATAGGCCCTAGGAAACGTGTGCTTCTACTTCTAC  
>HPVcand85\_Alpha\_4574720\_nt7031\_L1\_Tile|1  
GGTTACGACCTAAACCCACCATAGGCCCTAGGAAACGTGTTGCTTCTACTTCTACTGCTA  
>HPVcand85\_Alpha\_4574720\_nt7036\_L1\_Tile|1  
CGACCTAAACCCACCATAGGCCCTAGGAAACGTGTTGCTTCTACTTCTACTGCTACTAGG  
>HPVcand85\_Alpha\_4574720\_nt7041\_L1\_Tile|1  
TAAACCCACCATAGGCCCTAGGAAACGTGTTGCTTCTACTTCTACTGCTACTAGGCCCTC  
>HPVcand85\_Alpha\_4574720\_nt7051\_L1\_Tile|1  
ATAGGCCCTAGGAAACGTGTTGCTTCTACTTCTACTGCTACTAGGCCCTCCAAACGGAAA  
>HPVcand85\_Alpha\_4574720\_nt7056\_L1\_Tile|1  
CCCTAGGAAACGTGTTGCTTCTACTTCTACTGCTACTAGGCCCTCCAAACGGAAACGTAC  
>HPVcand85\_Alpha\_4574720\_nt7061\_L1\_Tile|1  
GGAAACGTGTTGCTTCTACTTCTACTGCTACTAGGCCCTCCAAACGGAAACGTACTGCTA  
>HPVcand86\_Alpha\_15741127\_nt6186\_L1\_Tile|1  
AGTGTGTTCTAATGTGCAGCCTAAACCAGGGGACTGCCCCCATTTACAGTTTACCAATTC  
>HPVcand86\_Alpha\_15741127\_nt6486\_L1\_Tile|1  
AACTTATTATTTAAAGGGCTCCTCAGGCCCCCGAGGATCCCTTAGCAGTTATGTATATGC  
>HPVcand86\_Alpha\_15741127\_nt6491\_L1\_Tile|1  
ATTATTTAAAGGGCTCCTCAGGCCCCCGAGGATCCCTTAGCAGTTATGTATATGCACCCA  
>HPVcand86\_Alpha\_15741127\_nt6701\_L1\_Tile|1  
TTAGTGCCGCTACCCAGAAGGCCTCTGAATATGACCCCTCTAAGTTTAAATGAATATCTAA  
>HPVcand87\_Alpha\_14475578\_nt5878\_L1\_Tile|1  
CCTGCTTACTGTGGGTCACCCTTACTATCCAGTTACTGTTACCACCCCTGGTCAGAACAA  
>HPVcand87\_Alpha\_14475578\_nt5883\_L1\_Tile|1  
TTACTGTGGGTCACCCTTACTATCCAGTTACTGTTACCACCCCTGGTCAGAACAAGAAAT  
>HPVcand87\_Alpha\_14475578\_nt5888\_L1\_Tile|1  
GTGGGTCACCCTTACTATCCAGTTACTGTTACCACCCCTGGTCAGAACAAGAAATCCAAT  
>HPVcand87\_Alpha\_14475578\_nt5893\_L1\_Tile|1  
TCACCCTTACTATCCAGTTACTGTTACCACCCCTGGTCAGAACAAGAAATCCAATATTCC  
>HPVcand87\_Alpha\_14475578\_nt5898\_L1\_Tile|1  
CTTACTATCCAGTTACTGTTACCACCCCTGGTCAGAACAAGAAATCCAATATTCCAAAGG  
>HPVcand87\_Alpha\_14475578\_nt5903\_L1\_Tile|1  
TATCCAGTTACTGTTACCACCCCTGGTCAGAACAAGAAATCCAATATTCCAAAGGTGTCT  
>HPVcand87\_Alpha\_14475578\_nt5908\_L1\_Tile|1

AGTTACTGTTACCACCCCTGGTCAGAACAAGAAATCCAATATTCCAAAGGTGTCTGGCTA  
>HPVcand87\_Alpha\_14475578\_nt6243\_L1\_Tile|1  
GTAAGCCCTCTATAGGGGAGCATTGGAGTAAGGGTACTGTTTGTGCCAATGTACAGCCCA  
>HPVcand87\_Alpha\_14475578\_nt6248\_L1\_Tile|1  
CCCTCTATAGGGGAGCATTGGAGTAAGGGTACTGTTTGTGCCAATGTACAGCCCAAGACA  
>HPVcand87\_Alpha\_14475578\_nt6253\_L1\_Tile|1  
TATAGGGGAGCATTGGAGTAAGGGTACTGTTTGTGCCAATGTACAGCCCAAGACAGGGGA  
>HPVcand87\_Alpha\_14475578\_nt6268\_L1\_Tile|1  
GAGTAAGGGTACTGTTTGTGCCAATGTACAGCCCAAGACAGGGGATTGTCCACCATTGCA  
>HPVcand87\_Alpha\_14475578\_nt6283\_L1\_Tile|1  
TTGTGCCAATGTACAGCCCAAGACAGGGGATTGTCCACCATTGCAATTTACTAATTCTAC  
>HPVcand87\_Alpha\_14475578\_nt6288\_L1\_Tile|1  
CCAATGTACAGCCCAAGACAGGGGATTGTCCACCATTGCAATTTACTAATTCTACTATTC  
>HPVcand87\_Alpha\_14475578\_nt6558\_L1\_Tile|1  
CTATGGGCGAGGAGTCCCTGACACCTATTTTTTTGAAGGGGGCGTCGTCTGGCCCTAGGG  
>HPVcand87\_Alpha\_14475578\_nt6568\_L1\_Tile|1  
GGAGGTCCCTGACACCTATTTTTTTGAAGGGGGCGTCGTCTGGCCCTAGGGCCTCTTTAAG  
>HPVcand87\_Alpha\_14475578\_nt6583\_L1\_Tile|1  
CTATTTTTTTGAAGGGGGCGTCGTCTGGCCCTAGGGCCTCTTTAAGCAGTTATGTGTATGC  
>HPVcand87\_Alpha\_14475578\_nt6798\_L1\_Tile|1  
TTAGTGCTGCCACTCAAACAACCACTGAATATGACCCACAAAGTTTAAGGAATATTTAA  
>HPV88\_Gamma\_167600365\_nt5321\_L1\_Tile|1  
GGCAACAACAACTGGGAAGCTGTTCCCTTCCGCCGGCTAAACCTGTGGCAAAAATATTAT  
>HPV88\_Gamma\_167600365\_nt5326\_L1\_Tile|1  
CAACAACCTGGGAAGCTGTTCCCTTCCGCCGGCTAAACCTGTGGCAAAAATATTATCTACA  
>HPV88\_Gamma\_167600365\_nt5336\_L1\_Tile|1  
GGAAGCTGTTCCCTTCCGCCGGCTAAACCTGTGGCAAAAATATTATCTACAGATGATTATG  
>HPV88\_Gamma\_167600365\_nt5341\_L1\_Tile|1  
CTGTTCCCTTCCGCCGGCTAAACCTGTGGCAAAAATATTATCTACAGATGATTATGTTATT  
>HPV88\_Gamma\_167600365\_nt5356\_L1\_Tile|1  
GCTAAACCTGTGGCAAAAATATTATCTACAGATGATTATGTTATTGGAACCTCAGTTACAT  
>HPV88\_Gamma\_167600365\_nt5361\_L1\_Tile|1  
ACCTGTGGCAAAAATATTATCTACAGATGATTATGTTATTGGAACCTCAGTTACATTTTCA  
>HPV88\_Gamma\_167600365\_nt5366\_L1\_Tile|1  
TGGCAAAAATATTATCTACAGATGATTATGTTATTGGAACCTCAGTTACATTTTCATGCTG  
>HPV88\_Gamma\_167600365\_nt5376\_L1\_Tile|1  
ATTATCTACAGATGATTATGTTATTGGAACCTCAGTTACATTTTCATGCTGGCACTGATCG  
>HPV88\_Gamma\_167600365\_nt5381\_L1\_Tile|1  
CTACAGATGATTATGTTATTGGAACCTCAGTTACATTTTCATGCTGGCACTGATCGTCTGT  
>HPV88\_Gamma\_167600365\_nt5386\_L1\_Tile|1  
GATGATTATGTTATTGGAACCTCAGTTACATTTTCATGCTGGCACTGATCGTCTGTTAACA  
>HPV88\_Gamma\_167600365\_nt5391\_L1\_Tile|1  
TTATGTTATTGGAACCTCAGTTACATTTTCATGCTGGCACTGATCGTCTGTTAACAGTAGA  
>HPV88\_Gamma\_167600365\_nt5396\_L1\_Tile|1  
TTATTGGAACCTCAGTTACATTTTCATGCTGGCACTGATCGTCTGTTAACAGTAGACCATC  
>HPV88\_Gamma\_167600365\_nt5411\_L1\_Tile|1  
TACATTTTCATGCTGGCACTGATCGTCTGTTAACAGTAGACCATCCCTACTATGAAATTA  
>HPV88\_Gamma\_167600365\_nt5426\_L1\_Tile|1  
GCACTGATCGTCTGTTAACAGTAGACCATCCCTACTATGAAATTAGGAATGATGGAGATC  
>HPV88\_Gamma\_167600365\_nt5436\_L1\_Tile|1  
TCTGTTAACAGTAGACCATCCCTACTATGAAATTAGGAATGATGGAGATCCCAACAAAAT  
>HPV88\_Gamma\_167600365\_nt5441\_L1\_Tile|1  
TAACAGTAGACCATCCCTACTATGAAATTAGGAATGATGGAGATCCCAACAAAATTGAGA  
>HPV88\_Gamma\_167600365\_nt5446\_L1\_Tile|1  
GTAGACCATCCCTACTATGAAATTAGGAATGATGGAGATCCCAACAAAATTGAGATTCCT

>HPV88\_Gamma\_167600365\_nt5451\_L1\_Tile|1  
CCATCCCTACTATGAAATTAGGAATGATGGAGATCCCAACAAAATTGAGATTCCTAAGGT  
>HPV88\_Gamma\_167600365\_nt5456\_L1\_Tile|1  
CCTACTATGAAATTAGGAATGATGGAGATCCCAACAAAATTGAGATTCCTAAGGTGTCTG  
>HPV88\_Gamma\_167600365\_nt5461\_L1\_Tile|1  
TATGAAATTAGGAATGATGGAGATCCCAACAAAATTGAGATTCCTAAGGTGTCTGCATGC  
>HPV88\_Gamma\_167600365\_nt5516\_L1\_Tile|1  
CATGCCAATATCGAGTGTTTAGGCTGAAATTGCCTGATCCAAATAAATTTGCCTTAATAG  
>HPV88\_Gamma\_167600365\_nt5521\_L1\_Tile|1  
CAATATCGAGTGTTTAGGCTGAAATTGCCTGATCCAAATAAATTTGCCTTAATAGATCAG  
>HPV88\_Gamma\_167600365\_nt5526\_L1\_Tile|1  
TCGAGTGTTTAGGCTGAAATTGCCTGATCCAAATAAATTTGCCTTAATAGATCAGTCAAT  
>HPV88\_Gamma\_167600365\_nt5531\_L1\_Tile|1  
TGTTTAGGCTGAAATTGCCTGATCCAAATAAATTTGCCTTAATAGATCAGTCAATTTTCA  
>HPV88\_Gamma\_167600365\_nt5536\_L1\_Tile|1  
AGGCTGAAATTGCCTGATCCAAATAAATTTGCCTTAATAGATCAGTCAATTTTCAATCCT  
>HPV88\_Gamma\_167600365\_nt5541\_L1\_Tile|1  
GAAATTGCCTGATCCAAATAAATTTGCCTTAATAGATCAGTCAATTTTCAATCCTGAACG  
>HPV88\_Gamma\_167600365\_nt5546\_L1\_Tile|1  
TGCCTGATCCAAATAAATTTGCCTTAATAGATCAGTCAATTTTCAATCCTGAACGTGAAC  
>HPV88\_Gamma\_167600365\_nt5551\_L1\_Tile|1  
GATCCAAATAAATTTGCCTTAATAGATCAGTCAATTTTCAATCCTGAACGTGAACGTTTA  
>HPV88\_Gamma\_167600365\_nt5556\_L1\_Tile|1  
AAATAAATTTGCCTTAATAGATCAGTCAATTTTCAATCCTGAACGTGAACGTTTAGTTTG  
>HPV88\_Gamma\_167600365\_nt5566\_L1\_Tile|1  
GCCTTAATAGATCAGTCAATTTTCAATCCTGAACGTGAACGTTTAGTTTGAAATTAAAA  
>HPV88\_Gamma\_167600365\_nt5571\_L1\_Tile|1  
AATAGATCAGTCAATTTTCAATCCTGAACGTGAACGTTTAGTTTGAAATTAAAAAGGTAT  
>HPV88\_Gamma\_167600365\_nt5576\_L1\_Tile|1  
ATCAGTCAATTTTCAATCCTGAACGTGAACGTTTAGTTTGAAATTAAAAAGGTATTCAAA  
>HPV88\_Gamma\_167600365\_nt5581\_L1\_Tile|1  
TCAATTTTCAATCCTGAACGTGAACGTTTAGTTTGAAATTAAAAAGGTATTCAAATTGGT  
>HPV88\_Gamma\_167600365\_nt5586\_L1\_Tile|1  
TTTCAATCCTGAACGTGAACGTTTAGTTTGAAATTAAAAAGGTATTCAAATTGGTAGAGG  
>HPV88\_Gamma\_167600365\_nt5591\_L1\_Tile|1  
ATCCTGAACGTGAACGTTTAGTTTGAAATTAAAAAGGTATTCAAATTGGTAGAGGTGGAC  
>HPV88\_Gamma\_167600365\_nt5596\_L1\_Tile|1  
GAACGTGAACGTTTAGTTTGAAATTAAAAAGGTATTCAAATTGGTAGAGGTGGACCACTA  
>HPV88\_Gamma\_167600365\_nt5601\_L1\_Tile|1  
TGAACGTTTAGTTTGAAATTAAAAAGGTATTCAAATTGGTAGAGGTGGACCACTAAATGT  
>HPV88\_Gamma\_167600365\_nt5616\_L1\_Tile|1  
GAAATTAAAAAGGTATTCAAATTGGTAGAGGTGGACCACTAAATGTAGGTACTGCAGGTCA  
>HPV88\_Gamma\_167600365\_nt5621\_L1\_Tile|1  
TAAAAGGTATTCAAATTGGTAGAGGTGGACCACTAAATGTAGGTACTGCAGGTATCCTT  
>HPV88\_Gamma\_167600365\_nt5626\_L1\_Tile|1  
GGTATTCAAATTGGTAGAGGTGGACCACTAAATGTAGGTACTGCAGGTATCCTTTATTT  
>HPV88\_Gamma\_167600365\_nt5631\_L1\_Tile|1  
TCAAATTGGTAGAGGTGGACCACTAAATGTAGGTACTGCAGGTATCCTTTATTTAACAA  
>HPV88\_Gamma\_167600365\_nt5636\_L1\_Tile|1  
TTGGTAGAGGTGGACCACTAAATGTAGGTACTGCAGGTATCCTTTATTTAACAAAGCTC  
>HPV88\_Gamma\_167600365\_nt5666\_L1\_Tile|1  
CTGCAGGTATCCTTTATTTAACAAAGCTCCAGATACTGAAATCCTAATGATTATCCAC  
>HPV88\_Gamma\_167600365\_nt5676\_L1\_Tile|1  
TCCTTTATTTAACAAAGCTCCAGATACTGAAATCCTAATGATTATCCACCAGCTCAAAC  
>HPV88\_Gamma\_167600365\_nt5681\_L1\_Tile|1

TATTTAACAAAGCTCCAGATACTGAAAATCCTAATGATTATCCACCAGCTCAAACAGATG  
>HPV88\_Gamma\_167600365\_nt5731\_L1\_Tile|1  
CAAACAGATGAAGACAGACGTAACGTGTCTATGGACCCCAAACATACCCAATTATTTATA  
>HPV88\_Gamma\_167600365\_nt5736\_L1\_Tile|1  
AGATGAAGACAGACGTAACGTGTCTATGGACCCCAAACATACCCAATTATTTATAATTGG  
>HPV88\_Gamma\_167600365\_nt5741\_L1\_Tile|1  
AAGACAGACGTAACGTGTCTATGGACCCCAAACATACCCAATTATTTATAATTGGTTGCA  
>HPV88\_Gamma\_167600365\_nt5746\_L1\_Tile|1  
AGACGTAACGTGTCTATGGACCCCAAACATACCCAATTATTTATAATTGGTTGCATTCCT  
>HPV88\_Gamma\_167600365\_nt5751\_L1\_Tile|1  
TAACGTGTCTATGGACCCCAAACATACCCAATTATTTATAATTGGTTGCATTCCTGCAGA  
>HPV88\_Gamma\_167600365\_nt5756\_L1\_Tile|1  
TGTCTATGGACCCCAAACATACCCAATTATTTATAATTGGTTGCATTCCTGCAGATGGTG  
>HPV88\_Gamma\_167600365\_nt5761\_L1\_Tile|1  
ATGGACCCCAAACATACCCAATTATTTATAATTGGTTGCATTCCTGCAGATGGTGAATAT  
>HPV88\_Gamma\_167600365\_nt5806\_L1\_Tile|1  
GCAGATGGTGAATATTGGGATGTTGCTAAACCATGTGTTGGAGATCAGGCGAATGCAGGA  
>HPV88\_Gamma\_167600365\_nt5811\_L1\_Tile|1  
TGGTGAATATTGGGATGTTGCTAAACCATGTGTTGGAGATCAGGCGAATGCAGGAGACTG  
>HPV88\_Gamma\_167600365\_nt5816\_L1\_Tile|1  
AATATTGGGATGTTGCTAAACCATGTGTTGGAGATCAGGCGAATGCAGGAGACTGTCCAC  
>HPV88\_Gamma\_167600365\_nt5826\_L1\_Tile|1  
TGTTGCTAAACCATGTGTTGGAGATCAGGCGAATGCAGGAGACTGTCCACCTATACAGTT  
>HPV88\_Gamma\_167600365\_nt5831\_L1\_Tile|1  
CTAAACCATGTGTTGGAGATCAGGCGAATGCAGGAGACTGTCCACCTATACAGTTAGTTA  
>HPV88\_Gamma\_167600365\_nt5836\_L1\_Tile|1  
CCATGTGTTGGAGATCAGGCGAATGCAGGAGACTGTCCACCTATACAGTTAGTTAATGCT  
>HPV88\_Gamma\_167600365\_nt5841\_L1\_Tile|1  
TGTTGGAGATCAGGCGAATGCAGGAGACTGTCCACCTATACAGTTAGTTAATGCTGTTAT  
>HPV88\_Gamma\_167600365\_nt5846\_L1\_Tile|1  
GAGATCAGGCGAATGCAGGAGACTGTCCACCTATACAGTTAGTTAATGCTGTTATTCAGG  
>HPV88\_Gamma\_167600365\_nt5851\_L1\_Tile|1  
CAGGCGAATGCAGGAGACTGTCCACCTATACAGTTAGTTAATGCTGTTATTCAGGACGGA  
>HPV88\_Gamma\_167600365\_nt5856\_L1\_Tile|1  
GAATGCAGGAGACTGTCCACCTATACAGTTAGTTAATGCTGTTATTCAGGACGGAACAAT  
>HPV88\_Gamma\_167600365\_nt5861\_L1\_Tile|1  
CAGGAGACTGTCCACCTATACAGTTAGTTAATGCTGTTATTCAGGACGGAACAATGGGTG  
>HPV88\_Gamma\_167600365\_nt5866\_L1\_Tile|1  
GACTGTCCACCTATACAGTTAGTTAATGCTGTTATTCAGGACGGAACAATGGGTGACACA  
>HPV88\_Gamma\_167600365\_nt5901\_L1\_Tile|1  
TCAGGACGGAACAATGGGTGACACAGGTTTTGGGGCAGCAAATTTAAGAACTTTTTGCA  
>HPV88\_Gamma\_167600365\_nt5926\_L1\_Tile|1  
GGTTTTGGGGCAGCAAATTTAAGAACTTTTTGCAAGACAAAGCAGGTGTTCCCTCTGGAT  
>HPV88\_Gamma\_167600365\_nt5941\_L1\_Tile|1  
AATTTTAAGAACTTTTTGCAAGACAAAGCAGGTGTTCCCTCTGGATATTATTAATGATATA  
>HPV88\_Gamma\_167600365\_nt5986\_L1\_Tile|1  
ATTATTAATGATATATGTATGTATCCAGACTTCCTTAAAATGGACAAAGATGTTTATGGC  
>HPV88\_Gamma\_167600365\_nt5991\_L1\_Tile|1  
TAATGATATATGTATCCAGACTTCCTTAAAATGGACAAAGATGTTTATGGCGATAA  
>HPV88\_Gamma\_167600365\_nt6011\_L1\_Tile|1  
CAGACTTCCTTAAAATGGACAAAGATGTTTATGGCGATAAATGTTTCTTTTTTGGAAAAC  
>HPV88\_Gamma\_167600365\_nt6016\_L1\_Tile|1  
TTCCTTAAAATGGACAAAGATGTTTATGGCGATAAATGTTTCTTTTTTGGAAAACGTGAG  
>HPV88\_Gamma\_167600365\_nt6031\_L1\_Tile|1  
AAAGATGTTTATGGCGATAAATGTTTCTTTTTTGGAAAACGTGAGCAGTCGTATGCTCGC

>HPV88\_Gamma\_167600365\_nt6041\_L1\_Tile|1  
ATGGCGATAAAATGTTTCTTTTTTGGAAAACGTGAGCAGTCGTATGCTCGCCATTTTATGG  
>HPV88\_Gamma\_167600365\_nt6051\_L1\_Tile|1  
ATGTTTCTTTTTTGGAAAACGTGAGCAGTCGTATGCTCGCCATTTTATGGCTCGTGAAGG  
>HPV88\_Gamma\_167600365\_nt6056\_L1\_Tile|1  
TCTTTTTTGGAAAACGTGAGCAGTCGTATGCTCGCCATTTTATGGCTCGTGAAGGTAAAA  
>HPV88\_Gamma\_167600365\_nt6066\_L1\_Tile|1  
AAAACGTGAGCAGTCGTATGCTCGCCATTTTATGGCTCGTGAAGGTAAAAATGGGAGATGC  
>HPV88\_Gamma\_167600365\_nt6071\_L1\_Tile|1  
GTGAGCAGTCGTATGCTCGCCATTTTATGGCTCGTGAAGGTAAAAATGGGAGATGCCATAC  
>HPV88\_Gamma\_167600365\_nt6076\_L1\_Tile|1  
CAGTCGTATGCTCGCCATTTTATGGCTCGTGAAGGTAAAAATGGGAGATGCCATACCAGAG  
>HPV88\_Gamma\_167600365\_nt6081\_L1\_Tile|1  
GTATGCTCGCCATTTTATGGCTCGTGAAGGTAAAAATGGGAGATGCCATACCAGAGGGAAA  
>HPV88\_Gamma\_167600365\_nt6086\_L1\_Tile|1  
CTCGCCATTTTATGGCTCGTGAAGGTAAAAATGGGAGATGCCATACCAGAGGGAAATAAAT  
>HPV88\_Gamma\_167600365\_nt6091\_L1\_Tile|1  
CATTTTATGGCTCGTGAAGGTAAAAATGGGAGATGCCATACCAGAGGGAAATAAATACTTA  
>HPV88\_Gamma\_167600365\_nt6096\_L1\_Tile|1  
TATGGCTCGTGAAGGTAAAAATGGGAGATGCCATACCAGAGGGAAATAAATACTTATTGCC  
>HPV88\_Gamma\_167600365\_nt6106\_L1\_Tile|1  
GAAGGTAAAAATGGGAGATGCCATACCAGAGGGAAATAAATACTTATTGCCACCTACAAAT  
>HPV88\_Gamma\_167600365\_nt6116\_L1\_Tile|1  
TGGGAGATGCCATACCAGAGGGAAATAAATACTTATTGCCACCTACAAATGCTGTGAATT  
>HPV88\_Gamma\_167600365\_nt6121\_L1\_Tile|1  
GATGCCATACCAGAGGGAAATAAATACTTATTGCCACCTACAAATGCTGTGAATTTTAAA  
>HPV88\_Gamma\_167600365\_nt6126\_L1\_Tile|1  
CATACCAGAGGGAAATAAATACTTATTGCCACCTACAAATGCTGTGAATTTTAAAATGGG  
>HPV88\_Gamma\_167600365\_nt6131\_L1\_Tile|1  
CAGAGGGAAATAAATACTTATTGCCACCTACAAATGCTGTGAATTTTAAAATGGGATCTC  
>HPV88\_Gamma\_167600365\_nt6136\_L1\_Tile|1  
GGAAATAAATACTTATTGCCACCTACAAATGCTGTGAATTTTAAAATGGGATCTCATGTT  
>HPV88\_Gamma\_167600365\_nt6141\_L1\_Tile|1  
TAAATACTTATTGCCACCTACAAATGCTGTGAATTTTAAAATGGGATCTCATGTTTATTT  
>HPV88\_Gamma\_167600365\_nt6161\_L1\_Tile|1  
CAAATGCTGTGAATTTTAAAATGGGATCTCATGTTTATTTCCCTACTGCTAGTGGATCAC  
>HPV88\_Gamma\_167600365\_nt6166\_L1\_Tile|1  
GCTGTGAATTTTAAAATGGGATCTCATGTTTATTTCCCTACTGCTAGTGGATCACTTACT  
>HPV88\_Gamma\_167600365\_nt6171\_L1\_Tile|1  
GAATTTTAAAATGGGATCTCATGTTTATTTCCCTACTGCTAGTGGATCACTTACTACTAG  
>HPV88\_Gamma\_167600365\_nt6176\_L1\_Tile|1  
TTAAAATGGGATCTCATGTTTATTTCCCTACTGCTAGTGGATCACTTACTACTAGTGATT  
>HPV88\_Gamma\_167600365\_nt6181\_L1\_Tile|1  
ATGGGATCTCATGTTTATTTCCCTACTGCTAGTGGATCACTTACTACTAGTGATTCTAAC  
>HPV88\_Gamma\_167600365\_nt6186\_L1\_Tile|1  
ATCTCATGTTTATTTCCCTACTGCTAGTGGATCACTTACTACTAGTGATTCTAACTTATT  
>HPV88\_Gamma\_167600365\_nt6196\_L1\_Tile|1  
TATTTCCCTACTGCTAGTGGATCACTTACTACTAGTGATTCTAACTTATTTAACAGACCT  
>HPV88\_Gamma\_167600365\_nt6201\_L1\_Tile|1  
CCCTACTGCTAGTGGATCACTTACTACTAGTGATTCTAACTTATTTAACAGACCTTATTG  
>HPV88\_Gamma\_167600365\_nt6211\_L1\_Tile|1  
AGTGGATCACTTACTACTAGTGATTCTAACTTATTTAACAGACCTTATTGGCTACAGAGA  
>HPV88\_Gamma\_167600365\_nt6221\_L1\_Tile|1  
TTACTACTAGTGATTCTAACTTATTTAACAGACCTTATTGGCTACAGAGATCTTTAGGTG  
>HPV88\_Gamma\_167600365\_nt6316\_L1\_Tile|1

GTTACTGTTCTTGATAACAGCAGGAATACTAATTTTACTCTTTCCATTTATAATCAGGGA  
>HPV88\_Gamma\_167600365\_nt6321\_L1\_Tile|1  
TGTTCTTGATAACAGCAGGAATACTAATTTTACTCTTTCCATTTATAATCAGGGAGGAGC  
>HPV88\_Gamma\_167600365\_nt6326\_L1\_Tile|1  
TTGATAACAGCAGGAATACTAATTTTACTCTTTCCATTTATAATCAGGGAGGAGCTATTG  
>HPV88\_Gamma\_167600365\_nt6336\_L1\_Tile|1  
CAGGAATACTAATTTTACTCTTTCCATTTATAATCAGGGAGGAGCTATTGGAAATCAGTA  
>HPV88\_Gamma\_167600365\_nt6341\_L1\_Tile|1  
ATACTAATTTTACTCTTTCCATTTATAATCAGGGAGGAGCTATTGGAAATCAGTATACTT  
>HPV88\_Gamma\_167600365\_nt6346\_L1\_Tile|1  
AATTTTACTCTTTCCATTTATAATCAGGGAGGAGCTATTGGAAATCAGTATACTTATAAA  
>HPV88\_Gamma\_167600365\_nt6351\_L1\_Tile|1  
TACTCTTTCCATTTATAATCAGGGAGGAGCTATTGGAAATCAGTATACTTATAAATCTCA  
>HPV88\_Gamma\_167600365\_nt6356\_L1\_Tile|1  
TTTCCATTTATAATCAGGGAGGAGCTATTGGAAATCAGTATACTTATAAATCTCAAGATT  
>HPV88\_Gamma\_167600365\_nt6361\_L1\_Tile|1  
ATTTATAATCAGGGAGGAGCTATTGGAAATCAGTATACTTATAAATCTCAAGATTTTACT  
>HPV88\_Gamma\_167600365\_nt6366\_L1\_Tile|1  
TAATCAGGGAGGAGCTATTGGAAATCAGTATACTTATAAATCTCAAGATTTTACTCAGTA  
>HPV88\_Gamma\_167600365\_nt6371\_L1\_Tile|1  
AGGGAGGAGCTATTGGAAATCAGTATACTTATAAATCTCAAGATTTTACTCAGTATACTC  
>HPV88\_Gamma\_167600365\_nt6376\_L1\_Tile|1  
GGAGCTATTGGAAATCAGTATACTTATAAATCTCAAGATTTTACTCAGTATACTCGACAT  
>HPV88\_Gamma\_167600365\_nt6381\_L1\_Tile|1  
TATTGGAAATCAGTATACTTATAAATCTCAAGATTTTACTCAGTATACTCGACATGCAGA  
>HPV88\_Gamma\_167600365\_nt6386\_L1\_Tile|1  
GAAATCAGTATACTTATAAATCTCAAGATTTTACTCAGTATACTCGACATGCAGAGGAAT  
>HPV88\_Gamma\_167600365\_nt6391\_L1\_Tile|1  
CAGTATACTTATAAATCTCAAGATTTTACTCAGTATACTCGACATGCAGAGGAATACGAA  
>HPV88\_Gamma\_167600365\_nt6396\_L1\_Tile|1  
TACTTATAAATCTCAAGATTTTACTCAGTATACTCGACATGCAGAGGAATACGAATTGGA  
>HPV88\_Gamma\_167600365\_nt6401\_L1\_Tile|1  
ATAAATCTCAAGATTTTACTCAGTATACTCGACATGCAGAGGAATACGAATTGGAAGCTA  
>HPV88\_Gamma\_167600365\_nt6406\_L1\_Tile|1  
TCTCAAGATTTTACTCAGTATACTCGACATGCAGAGGAATACGAATTGGAAGCTATATTC  
>HPV88\_Gamma\_167600365\_nt6411\_L1\_Tile|1  
AGATTTTACTCAGTATACTCGACATGCAGAGGAATACGAATTGGAAGCTATATTCAGCT  
>HPV88\_Gamma\_167600365\_nt6421\_L1\_Tile|1  
CAGTATACTCGACATGCAGAGGAATACGAATTGGAAGCTATATTCAGCTTTGTAGAGTT  
>HPV88\_Gamma\_167600365\_nt6426\_L1\_Tile|1  
TACTCGACATGCAGAGGAATACGAATTGGAAGCTATATTCAGCTTTGTAGAGTTCCTTT  
>HPV88\_Gamma\_167600365\_nt6431\_L1\_Tile|1  
GACATGCAGAGGAATACGAATTGGAAGCTATATTCAGCTTTGTAGAGTTCCTTTGGAGC  
>HPV88\_Gamma\_167600365\_nt6451\_L1\_Tile|1  
TTGGAAGCTATATTCAGCTTTGTAGAGTTCCTTTGGAGCCTGATATTTAGCTCACTTA  
>HPV88\_Gamma\_167600365\_nt6456\_L1\_Tile|1  
AGCTATATTCAGCTTTGTAGAGTTCCTTTGGAGCCTGATATTTAGCTCACTTAAATGT  
>HPV88\_Gamma\_167600365\_nt6566\_L1\_Tile|1  
CTCCTCAGAGTATAGAGGACAATTATAGATATATAACATCTTTGGCAACAAGATGTCCTA  
>HPV88\_Gamma\_167600365\_nt6571\_L1\_Tile|1  
CAGAGTATAGAGGACAATTATAGATATATAACATCTTTGGCAACAAGATGTCCTACTGAA  
>HPV88\_Gamma\_167600365\_nt6576\_L1\_Tile|1  
TATAGAGGACAATTATAGATATATAACATCTTTGGCAACAAGATGTCCTACTGAAAATCC  
>HPV88\_Gamma\_167600365\_nt6581\_L1\_Tile|1  
AGGACAATTATAGATATATAACATCTTTGGCAACAAGATGTCCTACTGAAAATCCTGCTC

>HPV88\_Gamma\_167600365\_nt6596\_L1\_Tile|1  
ATATAACATCTTTGGCAACAAGATGTCTACTGAAAATCCTGCTCCAGAAATACCTGACC  
>HPV88\_Gamma\_167600365\_nt6601\_L1\_Tile|1  
ACATCTTTGGCAACAAGATGTCTACTGAAAATCCTGCTCCAGAAATACCTGACCCTTAT  
>HPV88\_Gamma\_167600365\_nt6606\_L1\_Tile|1  
TTTGGCAACAAGATGTCTACTGAAAATCCTGCTCCAGAAATACCTGACCCTTATAAAGA  
>HPV88\_Gamma\_167600365\_nt6611\_L1\_Tile|1  
CAACAAGATGTCTACTGAAAATCCTGCTCCAGAAATACCTGACCCTTATAAAGATTATA  
>HPV88\_Gamma\_167600365\_nt6621\_L1\_Tile|1  
TCCTACTGAAAATCCTGCTCCAGAAATACCTGACCCTTATAAAGATTATAATTTTTGGTT  
>HPV88\_Gamma\_167600365\_nt6626\_L1\_Tile|1  
CTGAAAATCCTGCTCCAGAAATACCTGACCCTTATAAAGATTATAATTTTTGGTTAGTTG  
>HPV88\_Gamma\_167600365\_nt6631\_L1\_Tile|1  
AATCCTGCTCCAGAAATACCTGACCCTTATAAAGATTATAATTTTTGGTTAGTTGATTTG  
>HPV88\_Gamma\_167600365\_nt6641\_L1\_Tile|1  
CAGAAATACCTGACCCTTATAAAGATTATAATTTTTGGTTAGTTGATTGCAAGAGAAGT  
>HPV88\_Gamma\_167600365\_nt6646\_L1\_Tile|1  
ATACCTGACCCTTATAAAGATTATAATTTTTGGTTAGTTGATTGCAAGAGAAGTTCTCC  
>HPV88\_Gamma\_167600365\_nt6651\_L1\_Tile|1  
TGACCCTTATAAAGATTATAATTTTTGGTTAGTTGATTGCAAGAGAAGTTCTCCAGTGA  
>HPV88\_Gamma\_167600365\_nt6656\_L1\_Tile|1  
CTTATAAAGATTATAATTTTTGGTTAGTTGATTGCAAGAGAAGTTCTCCAGTGAACCTG  
>HPV88\_Gamma\_167600365\_nt6661\_L1\_Tile|1  
AAAGATTATAATTTTTGGTTAGTTGATTGCAAGAGAAGTTCTCCAGTGAACCTTGACCAA  
>HPV88\_Gamma\_167600365\_nt6666\_L1\_Tile|1  
TTATAATTTTTGGTTAGTTGATTGCAAGAGAAGTTCTCCAGTGAACCTTGACCAATTTAG  
>HPV88\_Gamma\_167600365\_nt6676\_L1\_Tile|1  
TGGTTAGTTGATTGCAAGAGAAGTTCTCCAGTGAACCTTGACCAATTTAGCTTAGGTCGC  
>HPV88\_Gamma\_167600365\_nt6681\_L1\_Tile|1  
AGTTGATTGCAAGAGAAGTTCTCCAGTGAACCTTGACCAATTTAGCTTAGGTCGCAAATT  
>HPV88\_Gamma\_167600365\_nt6686\_L1\_Tile|1  
ATTTGCAAGAGAAGTTCTCCAGTGAACCTTGACCAATTTAGCTTAGGTCGCAAATTTTTGT  
>HPV88\_Gamma\_167600365\_nt6691\_L1\_Tile|1  
CAAGAGAAGTTCTCCAGTGAACCTTGACCAATTTAGCTTAGGTCGCAAATTTTTGTTCAA  
>HPV88\_Gamma\_167600365\_nt6731\_L1\_Tile|1  
GTCGCAAATTTTTGTTTCAAAGTGGTTTGCTGCCACAAAACGTGTCAGGACAGTTGCCA  
>HPV88\_Gamma\_167600365\_nt6736\_L1\_Tile|1  
AAATTTTTGTTCAAAGTGGTTTGCTGCCACAAAACGTGTCAGGACAGTTGCCAATAGT  
>HPV88\_Gamma\_167600365\_nt6761\_L1\_Tile|1  
TGCCCACAAAACGTGTCAGGACAGTTGCCAATAGTTCTGTTAGAAATACTTCCAGAACAG  
>HPV88\_Gamma\_167600365\_nt6766\_L1\_Tile|1  
ACAAAACGTGTCAGGACAGTTGCCAATAGTTCTGTTAGAAATACTTCCAGAACAGTAAAA  
>HPV88\_Gamma\_167600365\_nt6771\_L1\_Tile|1  
ACGTGTCAGGACAGTTGCCAATAGTTCTGTTAGAAATACTTCCAGAACAGTAAAAAGAAA  
>HPV88\_Gamma\_167600365\_nt6776\_L1\_Tile|1  
TCAGGACAGTTGCCAATAGTTCTGTTAGAAATACTTCCAGAACAGTAAAAAGAAAACGAA  
>HPV88\_Gamma\_167600365\_nt6784\_L1\_Tile|1  
GTTGCCAATAGTTCTGTTAGAAATACTTCCAGAACAGTAAAAAGAAAACGAACACGATAA  
>HPVcand89\_Alpha\_22095322\_nt5808\_L1\_Tile|1  
TGTCCAAAGTTTAAAGTACGGACCGCTATGTCCAGCGTACCAACCTGTACTATTATGGAG  
>HPVcand89\_Alpha\_22095322\_nt5853\_L1\_Tile|1  
TGTACTATTATGGAGGCAGCTCCCGCCTTATTACAGTTGGCCACCCTTATTATACTGTAC  
>HPVcand89\_Alpha\_22095322\_nt5868\_L1\_Tile|1  
GCAGCTCCCGCCTTATTACAGTTGGCCACCCTTATTATACTGTACAGGTCAATGGTGCTA  
>HPVcand89\_Alpha\_22095322\_nt5873\_L1\_Tile|1

TCCCGCCTTATTACAGTTGGCCACCCTTATTATACTGTACAGGTCAATGGTGCTAACAAA  
>HPVcand89\_Alpha\_22095322\_nt5883\_L1\_Tile|1  
TTACAGTTGGCCACCCTTATTATACTGTACAGGTCAATGGTGCTAACAAAAAGGCCAACA  
>HPVcand89\_Alpha\_22095322\_nt5888\_L1\_Tile|1  
GTTGGCCACCCTTATTATACTGTACAGGTCAATGGTGCTAACAAAAAGGCCAACATACCT  
>HPVcand89\_Alpha\_22095322\_nt5898\_L1\_Tile|1  
CTTATTATACTGTACAGGTCAATGGTGCTAACAAAAAGGCCAACATACCTAAGGTATCAG  
>HPVcand89\_Alpha\_22095322\_nt6123\_L1\_Tile|1  
TATACAACCGTTTGGATGACACTGAAAAATGCTTCCTTATTGGTTGCTGCAGATGTTGACA  
>HPVcand89\_Alpha\_22095322\_nt6138\_L1\_Tile|1  
ATGACACTGAAAAATGCTTCCTTATTGGTTGCTGCAGATGTTGACAGTAGGGATAATATAT  
>HPVcand89\_Alpha\_22095322\_nt6143\_L1\_Tile|1  
ACTGAAAAATGCTTCCTTATTGGTTGCTGCAGATGTTGACAGTAGGGATAATATATCTGTT  
>HPVcand89\_Alpha\_22095322\_nt6153\_L1\_Tile|1  
CTTCCTTATTGGTTGCTGCAGATGTTGACAGTAGGGATAATATATCTGTTGACTATAAAC  
>HPVcand89\_Alpha\_22095322\_nt6158\_L1\_Tile|1  
TTATTGGTTGCTGCAGATGTTGACAGTAGGGATAATATATCTGTTGACTATAAACAAACA  
>HPVcand89\_Alpha\_22095322\_nt6273\_L1\_Tile|1  
CTGTGTGCTCTAGTGTTGTGCCTCAGCAGGGGGATTGCCACCTTTGCAGTTGCTAAATA  
>HPVcand89\_Alpha\_22095322\_nt6278\_L1\_Tile|1  
TGCTCTAGTGTTGTGCCTCAGCAGGGGGATTGCCACCTTTGCAGTTGCTAAATACTACT  
>HPVcand89\_Alpha\_22095322\_nt6538\_L1\_Tile|1  
TAATAGGCAGGGTGTTATGGGTGAGGACCTGCCAAAAACCTTGTATATGCCTGGGTCTGC  
>HPVcand89\_Alpha\_22095322\_nt6548\_L1\_Tile|1  
GGTGTTATGGGTGAGGACCTGCCAAAAACCTTGTATATGCCTGGGTCTGCTGCTAATAAC  
>HPVcand89\_Alpha\_22095322\_nt6553\_L1\_Tile|1  
TATGGGTGAGGACCTGCCAAAAACCTTGTATATGCCTGGGTCTGCTGCTAATAACAGAAA  
>HPVcand89\_Alpha\_22095322\_nt6558\_L1\_Tile|1  
GTGAGGACCTGCCAAAAACCTTGTATATGCCTGGGTCTGCTGCTAATAACAGAAATACAC  
>HPVcand89\_Alpha\_22095322\_nt6563\_L1\_Tile|1  
GACCTGCCAAAAACCTTGTATATGCCTGGGTCTGCTGCTAATAACAGAAATACACTTACT  
>HPVcand89\_Alpha\_22095322\_nt6568\_L1\_Tile|1  
GCCAAAAACCTTGTATATGCCTGGGTCTGCTGCTAATAACAGAAATACACTTACTAGCTA  
>HPVcand89\_Alpha\_22095322\_nt6573\_L1\_Tile|1  
AAACCTTGTATATGCCTGGGTCTGCTGCTAATAACAGAAATACACTTACTAGCTATGTAT  
>HPVcand89\_Alpha\_22095322\_nt6578\_L1\_Tile|1  
TTGTATATGCCTGGGTCTGCTGCTAATAACAGAAATACACTTACTAGCTATGTATATGCC  
>HPVcand89\_Alpha\_22095322\_nt6583\_L1\_Tile|1  
TATGCCTGGGTCTGCTGCTAATAACAGAAATACACTTACTAGCTATGTATATGCCCCAAC  
>HPVcand89\_Alpha\_22095322\_nt6598\_L1\_Tile|1  
TGCTAATAACAGAAATACACTTACTAGCTATGTATATGCCCCAACGCCAGTGGGTCTAT  
>HPVcand89\_Alpha\_22095322\_nt6603\_L1\_Tile|1  
ATAACAGAAATACACTTACTAGCTATGTATATGCCCCAACGCCAGTGGGTCTATGGTTA  
>HPVcand89\_Alpha\_22095322\_nt6608\_L1\_Tile|1  
AGAAATACACTTACTAGCTATGTATATGCCCCAACGCCAGTGGGTCTATGGTTACATCT  
>HPVcand89\_Alpha\_22095322\_nt6778\_L1\_Tile|1  
TACCAACCTTACCATTTGTGCTGCTTCCAGTCTGGCACAGAATACAGTTCTACACGCTT  
>HPVcand89\_Alpha\_22095322\_nt6783\_L1\_Tile|1  
ACCTTACCATTTGTGCTGCTTCCAGTCTGGCACAGAATACAGTTCTACACGCTTTAAGG  
>HPVcand89\_Alpha\_22095322\_nt6788\_L1\_Tile|1  
ACCATTTGTGCTGCTTCCAGTCTGGCACAGAATACAGTTCTACACGCTTTAAGGAATAT  
>HPVcand89\_Alpha\_22095322\_nt6793\_L1\_Tile|1  
TTGTGCTGCTTCCAGTCTGGCACAGAATACAGTTCTACACGCTTTAAGGAATATTTAAG  
>HPVcand89\_Alpha\_22095322\_nt6798\_L1\_Tile|1  
CTGCTTCCAGTCTGGCACAGAATACAGTTCTACACGCTTTAAGGAATATTTAAGACACA



>HPVcand89\_Alpha\_22095322\_nt6858\_L1\_Tile|1  
CTGAGGAATATGACCTACAGTTTATATTCCAACCTATGTAAGATACACCTAACGCCTGAGA  
>HPVcand89\_Alpha\_22095322\_nt6863\_L1\_Tile|1  
GAATATGACCTACAGTTTATATTCCAACCTATGTAAGATACACCTAACGCCTGAGATAATG  
>HPVcand89\_Alpha\_22095322\_nt6873\_L1\_Tile|1  
TACAGTTTATATTCCAACCTATGTAAGATACACCTAACGCCTGAGATAATGTCCTATTTAC  
>HPVcand89\_Alpha\_22095322\_nt6878\_L1\_Tile|1  
TTTATATTCCAACCTATGTAAGATACACCTAACGCCTGAGATAATGTCCTATTTACACAAT  
>HPVcand89\_Alpha\_22095322\_nt6883\_L1\_Tile|1  
ATTCCAACCTATGTAAGATACACCTAACGCCTGAGATAATGTCCTATTTACACAATATGAA  
>HPVcand89\_Alpha\_22095322\_nt6888\_L1\_Tile|1  
AACTATGTAAGATACACCTAACGCCTGAGATAATGTCCTATTTACACAATATGAATGACA  
>HPVcand89\_Alpha\_22095322\_nt6893\_L1\_Tile|1  
TGTAAGATACACCTAACGCCTGAGATAATGTCCTATTTACACAATATGAATGACACATTG  
>HPVcand89\_Alpha\_22095322\_nt6898\_L1\_Tile|1  
GATACACCTAACGCCTGAGATAATGTCCTATTTACACAATATGAATGACACATTGTTAGA  
>HPVcand89\_Alpha\_22095322\_nt6903\_L1\_Tile|1  
ACCTAACGCCTGAGATAATGTCCTATTTACACAATATGAATGACACATTGTTAGATGAAT  
>HPVcand89\_Alpha\_22095322\_nt7198\_L1\_Tile|1  
ACCTCGCAAGCGTGCTGCCCCGCTGTCTACCTCCAAAGCCCCCAAACGCAAAAAGGCCAA  
>HPV90\_Alpha\_22138122\_nt5908\_L1\_Tile|1  
GTTCCCGACTGTTAACTGTTGGCCATCCTTATTTTGCTATGCAAAAAGCAATCAGGAAAAA  
>HPV90\_Alpha\_22138122\_nt6258\_L1\_Tile|1  
CAGCTATTTATTATAGGGTGCAAACCTCCTTTAGGCGAGCACTGGGCAAAGGGTACCCCA  
>HPV90\_Alpha\_22138122\_nt6263\_L1\_Tile|1  
ATTTATTATAGGGTGCAAACCTCCTTTAGGCGAGCACTGGGCAAAGGGTACCCCATGCAA  
>HPV90\_Alpha\_22138122\_nt6273\_L1\_Tile|1  
GGGTGCAAACCTCCTTTAGGCGAGCACTGGGCAAAGGGTACCCCATGCAATATGTCTAAT  
>HPV90\_Alpha\_22138122\_nt6278\_L1\_Tile|1  
CAAACCTCCTTTAGGCGAGCACTGGGCAAAGGGTACCCCATGCAATATGTCTAATGTACA  
>HPV90\_Alpha\_22138122\_nt6283\_L1\_Tile|1  
CTCCTTTAGGCGAGCACTGGGCAAAGGGTACCCCATGCAATATGTCTAATGTACAGGCTG  
>HPV90\_Alpha\_22138122\_nt6308\_L1\_Tile|1  
GGGTACCCCATGCAATATGTCTAATGTACAGGCTGGGGATTGCCCTCCTATAGAACTTAA  
>HPV90\_Alpha\_22138122\_nt6313\_L1\_Tile|1  
CCCCATGCAATATGTCTAATGTACAGGCTGGGGATTGCCCTCCTATAGAACTTAAATCTT  
>HPV90\_Alpha\_22138122\_nt6523\_L1\_Tile|1  
GTGACCTTATGTTTTCTGTTTACGTAGGGAACAGATGTTTATAAGGCACTTTTATAACA  
>HPV90\_Alpha\_22138122\_nt6548\_L1\_Tile|1  
TAGGGAACAGATGTTTATAAGGCACTTTTATAACAGAGCAGGTACTATGGGCGACGCAAT  
>HPV90\_Alpha\_22138122\_nt6558\_L1\_Tile|1  
ATGTTTATAAGGCACTTTTATAACAGAGCAGGTACTATGGGCGACGCAATTCCCGATGGC  
>HPV90\_Alpha\_22138122\_nt6563\_L1\_Tile|1  
TATAAGGCACTTTTATAACAGAGCAGGTACTATGGGCGACGCAATTCCCGATGGCTTTGT  
>HPV90\_Alpha\_22138122\_nt6568\_L1\_Tile|1  
GGCACTTTTATAACAGAGCAGGTACTATGGGCGACGCAATTCCCGATGGCTTTGTGCTAA  
>HPV90\_Alpha\_22138122\_nt6573\_L1\_Tile|1  
TTTTATAACAGAGCAGGTACTATGGGCGACGCAATTCCCGATGGCTTTGTGCTAAAAGGA  
>HPV90\_Alpha\_22138122\_nt6578\_L1\_Tile|1  
TAACAGAGCAGGTACTATGGGCGACGCAATTCCCGATGGCTTTGTGCTAAAAGGAACATC  
>HPV90\_Alpha\_22138122\_nt6583\_L1\_Tile|1  
GAGCAGGTACTATGGGCGACGCAATTCCCGATGGCTTTGTGCTAAAAGGAACATCTTCTA  
>HPV90\_Alpha\_22138122\_nt6593\_L1\_Tile|1  
TATGGGCGACGCAATTCCCGATGGCTTTGTGCTAAAAGGAACATCTTCTACCTCTCGTGG  
>HPV90\_Alpha\_22138122\_nt6603\_L1\_Tile|1

GCAATTCCCGATGGCTTTGTGCTAAAAGGAACATCTTCTACCTCTCGTGGCACTCCTACA  
>HPV90\_Alpha\_22138122\_nt7058\_L1\_Tile|1  
CCTACAGTCCCAGGCTATTTCCCTGTCAAAAACCTTCTGCTGTCCCTACAGAGAACAAGGA  
>HPV90\_Alpha\_22138122\_nt7148\_L1\_Tile|1  
GGATTTGTCTGAACGTTTTTCCCTTGAGCTAGACCAATTCCTCTTGGCAGGAAATTTTT  
>HPV90\_Alpha\_22138122\_nt7173\_L1\_Tile|1  
GAGCTAGACCAATTCCTCTTGGCAGGAAATTTTTGCTGCAGCGTGGCACCCGGGTACGG  
>HPV90\_Alpha\_22138122\_nt7178\_L1\_Tile|1  
AGACCAATTCCTCTTGGCAGGAAATTTTTGCTGCAGCGTGGCACCCGGGTACGGTCGTC  
>HPV90\_Alpha\_22138122\_nt7251\_L1\_Tile|1  
AAGCGTCCCGCACCTCTACCGCCCCCTCTACAAAACGTAAACGGTCCAAACGTTCTCTAA  
>HPV91\_Alpha\_22023568\_nt5596\_L1\_Tile|1  
ATGTACCTCATACCAACACCAATGTGTCTACACTGCCTAACACAACAAAAATTGTTAACA  
>HPV91\_Alpha\_22023568\_nt5601\_L1\_Tile|1  
CCTCATACCAACACCAATGTGTCTACACTGCCTAACACAACAAAAATTGTTAACTACTACA  
>HPV91\_Alpha\_22023568\_nt5606\_L1\_Tile|1  
TACCAACACCAATGTGTCTACACTGCCTAACACAACAAAAATTGTTAACTACTACAGTCCC  
>HPV91\_Alpha\_22023568\_nt5611\_L1\_Tile|1  
ACACCAATGTGTCTACACTGCCTAACACAACAAAAATTGTTAACTACTACAGTCCCCTTG  
>HPV91\_Alpha\_22023568\_nt5616\_L1\_Tile|1  
AATGTGTCTACACTGCCTAACACAACAAAAATTGTTAACTACTACAGTCCCCTTGCAACA  
>HPV91\_Alpha\_22023568\_nt5621\_L1\_Tile|1  
GTCTACACTGCCTAACACAACAAAAATTGTTAACTACTACAGTCCCCTTGCAACAGTACC  
>HPV91\_Alpha\_22023568\_nt5626\_L1\_Tile|1  
CACTGCCTAACACAACAAAAATTGTTAACTACTACAGTCCCCTTGCAACAGTACCTGATA  
>HPV91\_Alpha\_22023568\_nt5631\_L1\_Tile|1  
CCTAACACAACAAAAATTGTTAACTACTACAGTCCCCTTGCAACAGTACCTGATATATAT  
>HPV91\_Alpha\_22023568\_nt5646\_L1\_Tile|1  
ATTGTTAACTACTACAGTCCCCTTGCAACAGTACCTGATATATATACACAAGCAGGACCT  
>HPV91\_Alpha\_22023568\_nt5651\_L1\_Tile|1  
TAACACTACAGTCCCCTTGCAACAGTACCTGATATATATACACAAGCAGGACCTGATAT  
>HPV91\_Alpha\_22023568\_nt5656\_L1\_Tile|1  
CTACAGTCCCCTTGCAACAGTACCTGATATATATACACAAGCAGGACCTGATATTACAT  
>HPV91\_Alpha\_22023568\_nt5666\_L1\_Tile|1  
ACTTGCAACAGTACCTGATATATATACACAAGCAGGACCTGATATTACATTTCTTACAGT  
>HPV91\_Alpha\_22023568\_nt5676\_L1\_Tile|1  
GTACCTGATATATATACACAAGCAGGACCTGATATTACATTTCTTACAGTGCCACTTAGT  
>HPV91\_Alpha\_22023568\_nt5681\_L1\_Tile|1  
TGATATATATACACAAGCAGGACCTGATATTACATTTCTTACAGTGCCACTTAGTGTCCC  
>HPV91\_Alpha\_22023568\_nt5691\_L1\_Tile|1  
ACACAAGCAGGACCTGATATTACATTTCTTACAGTGCCACTTAGTGTCCCCCTATGTGCCA  
>HPV91\_Alpha\_22023568\_nt5696\_L1\_Tile|1  
AGCAGGACCTGATATTACATTTCTTACAGTGCCACTTAGTGTCCCCCTATGTGCCATTGTC  
>HPV91\_Alpha\_22023568\_nt5706\_L1\_Tile|1  
GATATTACATTTCTTACAGTGCCACTTAGTGTCCCCCTATGTGCCATTGTCACCGTCTGTT  
>HPV91\_Alpha\_22023568\_nt5711\_L1\_Tile|1  
TACATTTCTTACAGTGCCACTTAGTGTCCCCCTATGTGCCATTGTCACCGTCTGTTACACC  
>HPV91\_Alpha\_22023568\_nt5716\_L1\_Tile|1  
TTCTTACAGTGCCACTTAGTGTCCCCCTATGTGCCATTGTCACCGTCTGTTACACCTTCTG  
>HPV91\_Alpha\_22023568\_nt5726\_L1\_Tile|1  
GCCACTTAGTGTCCCCCTATGTGCCATTGTCACCGTCTGTTACACCTTCTGCAGTATCAAT  
>HPV91\_Alpha\_22023568\_nt5731\_L1\_Tile|1  
TTAGTGTCCCCCTATGTGCCATTGTCACCGTCTGTTACACCTTCTGCAGTATCAATATATG  
>HPV91\_Alpha\_22023568\_nt5736\_L1\_Tile|1  
GTCCCCCTATGTGCCATTGTCACCGTCTGTTACACCTTCTGCAGTATCAATATATGGCACA

>HPV91\_Alpha\_22023568\_nt5751\_L1\_Tile|1  
TTGTCACCGTCTGTACACCTTCTGCAGTATCAATATATGGCACAGATTTTTATTACAT  
>HPV91\_Alpha\_22023568\_nt5761\_L1\_Tile|1  
CTGTTACACCTTCTGCAGTATCAATATATGGCACAGATTTTTATTACATCCTTCATTGT  
>HPV91\_Alpha\_22023568\_nt5971\_L1\_Tile|1  
TACCATGCTGGCAGTTCCCGTTTACTGGCTGTGGGCCACCCTTTTTTTCCTATAAAAAAAT  
>HPV91\_Alpha\_22023568\_nt5976\_L1\_Tile|1  
TGCTGGCAGTTCCCGTTTACTGGCTGTGGGCCACCCTTTTTTTCCTATAAAAAATAATTC  
>HPV91\_Alpha\_22023568\_nt5981\_L1\_Tile|1  
GCAGTTCCCGTTTACTGGCTGTGGGCCACCCTTTTTTTCCTATAAAAAATAATTCTGGTA  
>HPV91\_Alpha\_22023568\_nt5986\_L1\_Tile|1  
TCCCGTTTACTGGCTGTGGGCCACCCTTTTTTTCCTATAAAAAATAATTCTGGTAAAGTA  
>HPV91\_Alpha\_22023568\_nt5991\_L1\_Tile|1  
TTTACTGGCTGTGGGCCACCCTTTTTTTCCTATAAAAAATAATTCTGGTAAAGTAATTGT  
>HPV91\_Alpha\_22023568\_nt6006\_L1\_Tile|1  
CCACCCTTTTTTCCTATAAAAAATAATTCTGGTAAAGTAATTGTTCCCTAAAGTTTCAGG  
>HPV91\_Alpha\_22023568\_nt6011\_L1\_Tile|1  
CTTTTTTTCCTATAAAAAATAATTCTGGTAAAGTAATTGTTCCCTAAAGTTTCAGGTCACC  
>HPV91\_Alpha\_22023568\_nt6561\_L1\_Tile|1  
AGATTATTTAGGAATGGCAGCCGAGCCATACGGAAATAGTTTATTTTTCTTTTACGTAG  
>HPV91\_Alpha\_22023568\_nt6651\_L1\_Tile|1  
TAGGGCTGGTACTACAGGCGATGCTGTCCCTAAGGATTTGTATATTGCAGGAACAGGCAA  
>HPV91\_Alpha\_22023568\_nt6666\_L1\_Tile|1  
AGGCGATGCTGTCCCTAAGGATTTGTATATTGCAGGAACAGGCAACAGGGCGAACATAGC  
>HPV91\_Alpha\_22023568\_nt6671\_L1\_Tile|1  
ATGCTGTCCCTAAGGATTTGTATATTGCAGGAACAGGCAACAGGGCGAACATAGCAGGCA  
>HPV91\_Alpha\_22023568\_nt6676\_L1\_Tile|1  
GTCCCTAAGGATTTGTATATTGCAGGAACAGGCAACAGGGCGAACATAGCAGGCAGTATA  
>HPV91\_Alpha\_22023568\_nt6681\_L1\_Tile|1  
TAAGGATTTGTATATTGCAGGAACAGGCAACAGGGCGAACATAGCAGGCAGTATATATTA  
>HPV91\_Alpha\_22023568\_nt6686\_L1\_Tile|1  
ATTTGTATATTGCAGGAACAGGCAACAGGGCGAACATAGCAGGCAGTATATATTATTCTA  
>HPV91\_Alpha\_22023568\_nt6691\_L1\_Tile|1  
TATATTGCAGGAACAGGCAACAGGGCGAACATAGCAGGCAGTATATATTATTCTACTCCT  
>HPV91\_Alpha\_22023568\_nt6791\_L1\_Tile|1  
AACCCTTTGGATGCAAAAAGCACAGGGGCATAATAACGGCATCTGTTTTGGTAACCAGG  
>HPV91\_Alpha\_22023568\_nt6826\_L1\_Tile|1  
AACGGCATCTGTTTTGGTAACCAGGTGTTTGTAACTGTTGTGGATACAACCTCGCAGCACT  
>HPV91\_Alpha\_22023568\_nt6851\_L1\_Tile|1  
TGTTTGTAACTGTTGTGGATACAACCTCGCAGCACTAACTTAACCTTGTGTGCATCCACTG  
>HPV91\_Alpha\_22023568\_nt6861\_L1\_Tile|1  
TGTTGTGGATACAACCTCGCAGCACTAACTTAACCTTGTGTGCATCCACTGAGTCTGTGCT  
>HPV91\_Alpha\_22023568\_nt6866\_L1\_Tile|1  
TGGATACAACCTCGCAGCACTAACTTAACCTTGTGTGCATCCACTGAGTCTGTGCTACCTA  
>HPV91\_Alpha\_22023568\_nt6871\_L1\_Tile|1  
ACAACCTCGCAGCACTAACTTAACCTTGTGTGCATCCACTGAGTCTGTGCTACCTACTACA  
>HPV91\_Alpha\_22023568\_nt6881\_L1\_Tile|1  
GCACTAACTTAACCTTGTGTGCATCCACTGAGTCTGTGCTACCTACTACATATGACAACA  
>HPV91\_Alpha\_22023568\_nt6886\_L1\_Tile|1  
AACTTAACCTTGTGTGCATCCACTGAGTCTGTGCTACCTACTACATATGACAACACAAAG  
>HPV91\_Alpha\_22023568\_nt6891\_L1\_Tile|1  
AACCTTGTGTGCATCCACTGAGTCTGTGCTACCTACTACATATGACAACACAAAGTTCAA  
>HPV91\_Alpha\_22023568\_nt6896\_L1\_Tile|1  
TGTGTGCATCCACTGAGTCTGTGCTACCTACTACATATGACAACACAAAGTTCAAAGAAT  
>HPV91\_Alpha\_22023568\_nt6901\_L1\_Tile|1

GCATCCACTGAGTCTGTGCTACCTACTACATATGACAACACAAAGTTCAAAGAATATTTA  
>HPV91\_Alpha\_22023568\_nt6906\_L1\_Tile|1  
CACTGAGTCTGTGCTACCTACTACATATGACAACACAAAGTTCAAAGAATATTTAAGGCA  
>HPV91\_Alpha\_22023568\_nt6911\_L1\_Tile|1  
AGTCTGTGCTACCTACTACATATGACAACACAAAGTTCAAAGAATATTTAAGGCATGCAG  
>HPV91\_Alpha\_22023568\_nt6986\_L1\_Tile|1  
AGTTTATATTTCAATTATGCATTATAACACTTAATCCAGAGGTAATGACATACATCCACA  
>HPV91\_Alpha\_22023568\_nt7001\_L1\_Tile|1  
TATGCATTATAACACTTAATCCAGAGGTAATGACATACATCCACACTATGGATGCATCAT  
>HPV91\_Alpha\_22023568\_nt7006\_L1\_Tile|1  
ATTATAACACTTAATCCAGAGGTAATGACATACATCCACACTATGGATGCATCATTATTA  
>HPV91\_Alpha\_22023568\_nt7011\_L1\_Tile|1  
AACACTTAATCCAGAGGTAATGACATACATCCACACTATGGATGCATCATTATTAGAAGA  
>HPV91\_Alpha\_22023568\_nt7026\_L1\_Tile|1  
GGTAATGACATACATCCACACTATGGATGCATCATTATTAGAAGACTGGAACTTTGGGGT  
>HPV91\_Alpha\_22023568\_nt7051\_L1\_Tile|1  
GATGCATCATTATTAGAAGACTGGAACTTTGGGGTATCCCCTCCAGCCACGGCATCACTA  
>HPV91\_Alpha\_22023568\_nt7076\_L1\_Tile|1  
ACTTTGGGGTATCCCCTCCAGCCACGGCATCACTAGAGGATACTTATCGCTTTTTGGCTA  
>HPV91\_Alpha\_22023568\_nt7081\_L1\_Tile|1  
GGGGTATCCCCTCCAGCCACGGCATCACTAGAGGATACTTATCGCTTTTTGGCTAATAAG  
>HPV91\_Alpha\_22023568\_nt7086\_L1\_Tile|1  
ATCCCCTCCAGCCACGGCATCACTAGAGGATACTTATCGCTTTTTGGCTAATAAGGCAAT  
>HPV91\_Alpha\_22023568\_nt7131\_L1\_Tile|1  
GGCTAATAAGGCAATTGCCTGTCAAAAAAATGTCCCACCAAAGCCAAAGAGGACCCATA  
>HPV91\_Alpha\_22023568\_nt7136\_L1\_Tile|1  
ATAAGGCAATTGCCTGTCAAAAAAATGTCCCACCAAAGCCAAAGAGGACCCATACAAAA  
>HPV91\_Alpha\_22023568\_nt7141\_L1\_Tile|1  
GCAATTGCCTGTCAAAAAAATGTCCCACCAAAGCCAAAGAGGACCCATACAAAAACTAT  
>HPV91\_Alpha\_22023568\_nt7146\_L1\_Tile|1  
TGCCTGTCAAAAAAATGTCCCACCAAAGCCAAAGAGGACCCATACAAAAACTATACTTT  
>HPV91\_Alpha\_22023568\_nt7166\_L1\_Tile|1  
CACCAAAGCCAAAGAGGACCCATACAAAAACTATACTTTTTGGGATGTGGATCTTACCG  
>HPV91\_Alpha\_22023568\_nt7171\_L1\_Tile|1  
AAAGCCAAAGAGGACCCATACAAAAACTATACTTTTTGGGATGTGGATCTTACCGAAAG  
>HPV91\_Alpha\_22023568\_nt7316\_L1\_Tile|1  
GGAAGCGTGCAGCACCATCTCCAGTTCAGCGCCTGCCTCCAAACGAAAGAAAACCTAAGC  
>HPV92\_Beta\_27531786\_nt5719\_L1\_Tile|1  
ATTTGTTCAAAGGACCAACATCTTTTATCATGCAAATAGTGATCGCCTGCTGACAGTTGG  
>HPV92\_Beta\_27531786\_nt5729\_L1\_Tile|1  
AGGACCAACATCTTTTATCATGCAAATAGTGATCGCCTGCTGACAGTTGGACACCCTTAT  
>HPV92\_Beta\_27531786\_nt5754\_L1\_Tile|1  
ATAGTGATCGCCTGCTGACAGTTGGACACCCTTATTTTGAAGTGAGAAGCTCAGTTGATC  
>HPV92\_Beta\_27531786\_nt5759\_L1\_Tile|1  
GATCGCCTGCTGACAGTTGGACACCCTTATTTTGAAGTGAGAAGCTCAGTTGATCCACAT  
>HPV92\_Beta\_27531786\_nt5764\_L1\_Tile|1  
CCTGCTGACAGTTGGACACCCTTATTTTGAAGTGAGAAGCTCAGTTGATCCACATGATGT  
>HPV92\_Beta\_27531786\_nt5769\_L1\_Tile|1  
TGACAGTTGGACACCCTTATTTTGAAGTGAGAAGCTCAGTTGATCCACATGATGTATTAG  
>HPV92\_Beta\_27531786\_nt5774\_L1\_Tile|1  
GTTGGACACCCTTATTTTGAAGTGAGAAGCTCAGTTGATCCACATGATGTATTAGTGCCT  
>HPV92\_Beta\_27531786\_nt5779\_L1\_Tile|1  
ACACCCTTATTTTGAAGTGAGAAGCTCAGTTGATCCACATGATGTATTAGTGCCTAAGGT  
>HPV92\_Beta\_27531786\_nt5799\_L1\_Tile|1  
GAAGCTCAGTTGATCCACATGATGTATTAGTGCCTAAGGTGTCAGGGAATCAGTTTAGAG

>HPV92\_Beta\_27531786\_nt6034\_L1\_Tile|1  
AAATCCAAATAAGTACAATACTGGAACAAAGGATGACAGAGTAAACACATCTTTTGATCC  
>HPV92\_Beta\_27531786\_nt6039\_L1\_Tile|1  
CAAATAAGTACAATACTGGAACAAAGGATGACAGAGTAAACACATCTTTTGATCCAAAGC  
>HPV92\_Beta\_27531786\_nt6044\_L1\_Tile|1  
AAGTACAATACTGGAACAAAGGATGACAGAGTAAACACATCTTTTGATCCAAAGCAAATT  
>HPV92\_Beta\_27531786\_nt6049\_L1\_Tile|1  
CAATACTGGAACAAAGGATGACAGAGTAAACACATCTTTTGATCCAAAGCAAATTCAGTT  
>HPV92\_Beta\_27531786\_nt6059\_L1\_Tile|1  
ACAAAGGATGACAGAGTAAACACATCTTTTGATCCAAAGCAAATTCAGTTATTTGTTTTTA  
>HPV92\_Beta\_27531786\_nt6064\_L1\_Tile|1  
GGATGACAGAGTAAACACATCTTTTGATCCAAAGCAAATTCAGTTATTTGTTTTAGGATG  
>HPV92\_Beta\_27531786\_nt6069\_L1\_Tile|1  
ACAGAGTAAACACATCTTTTGATCCAAAGCAAATTCAGTTATTTGTTTTAGGATGTACAC  
>HPV92\_Beta\_27531786\_nt6084\_L1\_Tile|1  
CTTTTGATCCAAAGCAAATTCAGTTATTTGTTTTAGGATGTACACCATGCTTAGGTGAAC  
>HPV92\_Beta\_27531786\_nt6119\_L1\_Tile|1  
GGATGTACACCATGCTTAGGTGAACATTGGGACACAGCCTTACCATGTGCTGAAAAGCAA  
>HPV92\_Beta\_27531786\_nt6139\_L1\_Tile|1  
TGAACATTGGGACACAGCCTTACCATGTGCTGAAAAGCAACCAGATACTGGGGGATGCCC  
>HPV92\_Beta\_27531786\_nt6154\_L1\_Tile|1  
AGCCTTACCATGTGCTGAAAAGCAACCAGATACTGGGGGATGCCCACCATTAGAGTTAAA  
>HPV92\_Beta\_27531786\_nt6159\_L1\_Tile|1  
TACCATGTGCTGAAAAGCAACCAGATACTGGGGGATGCCCACCATTAGAGTTAAAAAACA  
>HPV92\_Beta\_27531786\_nt6164\_L1\_Tile|1  
TGTGCTGAAAAGCAACCAGATACTGGGGGATGCCCACCATTAGAGTTAAAAAACACTGTT  
>HPV92\_Beta\_27531786\_nt6169\_L1\_Tile|1  
TGAAAAGCAACCAGATACTGGGGGATGCCCACCATTAGAGTTAAAAAACACTGTTATCTC  
>HPV92\_Beta\_27531786\_nt6174\_L1\_Tile|1  
AGCAACCAGATACTGGGGGATGCCCACCATTAGAGTTAAAAAACACTGTTATCTCTGATG  
>HPV92\_Beta\_27531786\_nt6179\_L1\_Tile|1  
CCAGATACTGGGGGATGCCCACCATTAGAGTTAAAAAACACTGTTATCTCTGATGGAGAT  
>HPV92\_Beta\_27531786\_nt6224\_L1\_Tile|1  
ATCTCTGATGGAGATATGGTTGACATAGGCTTCGGTAATATGAATTTTAAGGCCTTATCA  
>HPV92\_Beta\_27531786\_nt6229\_L1\_Tile|1  
TGATGGAGATATGGTTGACATAGGCTTCGGTAATATGAATTTTAAGGCCTTATCAGTAAC  
>HPV92\_Beta\_27531786\_nt6234\_L1\_Tile|1  
GAGATATGGTTGACATAGGCTTCGGTAATATGAATTTTAAGGCCTTATCAGTAACCAAAT  
>HPV92\_Beta\_27531786\_nt6239\_L1\_Tile|1  
ATGGTTGACATAGGCTTCGGTAATATGAATTTTAAGGCCTTATCAGTAACCAAATCTGAC  
>HPV92\_Beta\_27531786\_nt6244\_L1\_Tile|1  
TGACATAGGCTTCGGTAATATGAATTTTAAGGCCTTATCAGTAACCAAATCTGACGTAAG  
>HPV92\_Beta\_27531786\_nt6249\_L1\_Tile|1  
TAGGCTTCGGTAATATGAATTTTAAGGCCTTATCAGTAACCAAATCTGACGTAAGTTTGG  
>HPV92\_Beta\_27531786\_nt6254\_L1\_Tile|1  
TTCGGTAATATGAATTTTAAGGCCTTATCAGTAACCAAATCTGACGTAAGTTTGGATATA  
>HPV92\_Beta\_27531786\_nt6259\_L1\_Tile|1  
TAATATGAATTTTAAGGCCTTATCAGTAACCAAATCTGACGTAAGTTTGGATATAGTAGA  
>HPV92\_Beta\_27531786\_nt6264\_L1\_Tile|1  
TGAATTTTAAGGCCTTATCAGTAACCAAATCTGACGTAAGTTTGGATATAGTAGACTCCA  
>HPV92\_Beta\_27531786\_nt6394\_L1\_Tile|1  
ACGAGAACAATGTTATGTTAGGCATATGTTTGTGCGCGGTGGTGTGTGGGTGATACCAT  
>HPV92\_Beta\_27531786\_nt6399\_L1\_Tile|1  
AACAAATGTTATGTTAGGCATATGTTTGTGCGCGGTGGTGTGTGGGTGATACCATCCCAG  
>HPV92\_Beta\_27531786\_nt6439\_L1\_Tile|1

TGTGGGTGATACCATCCCAGATGCAGTTGTAAATGAAGACCATAA CTTTATGTTACCTGC  
>HPV92\_Beta\_27531786\_nt6454\_L1\_Tile|1  
CCCAGATGCAGTTGTAAATGAAGACCATAA CTTTATGTTACCTGCAGCATCCAGTGACCA  
>HPV92\_Beta\_27531786\_nt6459\_L1\_Tile|1  
ATGCAGTTGTAAATGAAGACCATAA CTTTATGTTACCTGCAGCATCCAGTGACCAGTCTA  
>HPV92\_Beta\_27531786\_nt6469\_L1\_Tile|1  
AAATGAAGACCATAA CTTTATGTTACCTGCAGCATCCAGTGACCAGTCTAGAAGTCAAAT  
>HPV92\_Beta\_27531786\_nt6474\_L1\_Tile|1  
AAGACCATAA CTTTATGTTACCTGCAGCATCCAGTGACCAGTCTAGAAGTCAAATTGCCA  
>HPV92\_Beta\_27531786\_nt6479\_L1\_Tile|1  
CATAA CTTTATGTTACCTGCAGCATCCAGTGACCAGTCTAGAAGTCAAATTGCCAGTTCT  
>HPV92\_Beta\_27531786\_nt6489\_L1\_Tile|1  
TGTTACCTGCAGCATCCAGTGACCAGTCTAGAAGTCAAATTGCCAGTTCTATCTATTTCC  
>HPV92\_Beta\_27531786\_nt6499\_L1\_Tile|1  
AGCATCCAGTGACCAGTCTAGAAGTCAAATTGCCAGTTCTATCTATTTCCCTACTGTTAG  
>HPV92\_Beta\_27531786\_nt6644\_L1\_Tile|1  
TGGAGTAATGAAC TGTTC TGACAGTTTGTGATAATACCAGGAATACTA A CTTTAATATT  
>HPV92\_Beta\_27531786\_nt6649\_L1\_Tile|1  
TAATGAAC TGTTC TGACAGTTTGTGATAATACCAGGAATACTA A CTTTAATATTAGTGT  
>HPV92\_Beta\_27531786\_nt6654\_L1\_Tile|1  
AACTGTTTC TGACAGTTTGTGATAATACCAGGAATACTA A CTTTAATATTAGTGTCCCTA  
>HPV92\_Beta\_27531786\_nt6659\_L1\_Tile|1  
TTTCTGACAGTTTGTGATAATACCAGGAATACTA A CTTTAATATTAGTGTCCCTAAGGAA  
>HPV92\_Beta\_27531786\_nt6664\_L1\_Tile|1  
GACAGTTTGTGATAATACCAGGAATACTA A CTTTAATATTAGTGTCCCTAAGGAAGGTGG  
>HPV92\_Beta\_27531786\_nt6669\_L1\_Tile|1  
TTTGTGATAATACCAGGAATACTA A CTTTAATATTAGTGTCCCTAAGGAAGGTGGTCAA  
>HPV92\_Beta\_27531786\_nt6674\_L1\_Tile|1  
GATAATACCAGGAATACTA A CTTTAATATTAGTGTCCCTAAGGAAGGTGGTCAAATAACC  
>HPV92\_Beta\_27531786\_nt6679\_L1\_Tile|1  
TACCAGGAATACTA A CTTTAATATTAGTGTCCCTAAGGAAGGTGGTCAAATAACCGACTA  
>HPV92\_Beta\_27531786\_nt6684\_L1\_Tile|1  
GGAATACTA A CTTTAATATTAGTGTCCCTAAGGAAGGTGGTCAAATAACCGACTATGATT  
>HPV92\_Beta\_27531786\_nt6689\_L1\_Tile|1  
ACTA A CTTTAATATTAGTGTCCCTAAGGAAGGTGGTCAAATAACCGACTATGATTACAA  
>HPV92\_Beta\_27531786\_nt6694\_L1\_Tile|1  
CTTTAATATTAGTGTCCCTAAGGAAGGTGGTCAAATAACCGACTATGATTACAAAAGAT  
>HPV92\_Beta\_27531786\_nt6699\_L1\_Tile|1  
ATATTAGTGTCCCTAAGGAAGGTGGTCAAATAACCGACTATGATTACAAAAGATTAGAG  
>HPV92\_Beta\_27531786\_nt6704\_L1\_Tile|1  
AGTGTCCCTAAGGAAGGTGGTCAAATAACCGACTATGATTACAAAAGATTAGAGAATAC  
>HPV92\_Beta\_27531786\_nt6709\_L1\_Tile|1  
CCCTAAGGAAGGTGGTCAAATAACCGACTATGATTACAAAAGATTAGAGAATACACTAG  
>HPV92\_Beta\_27531786\_nt6719\_L1\_Tile|1  
GGTGGTCAAATAACCGACTATGATTACAAAAGATTAGAGAATACACTAGACATGTTGAA  
>HPV92\_Beta\_27531786\_nt6724\_L1\_Tile|1  
TCAAATAACCGACTATGATTACAAAAGATTAGAGAATACACTAGACATGTTGAAGAATA  
>HPV92\_Beta\_27531786\_nt6739\_L1\_Tile|1  
TGATTACAAAAGATTAGAGAATACACTAGACATGTTGAAGAATATGAAATATCACTAAT  
>HPV92\_Beta\_27531786\_nt6894\_L1\_Tile|1  
TTCCTACTCCAGATAAC CTTATTCAGGATGCATACAGATTTATTCATTCTAAAGCAACAC  
>HPV92\_Beta\_27531786\_nt6899\_L1\_Tile|1  
ACTCCAGATAAC CTTATTCAGGATGCATACAGATTTATTCATTCTAAAGCAACACCTTGT  
>HPV92\_Beta\_27531786\_nt6904\_L1\_Tile|1  
AGATAAC CTTATTCAGGATGCATACAGATTTATTCATTCTAAAGCAACACCTTGTCCAGA

>HPV92\_Beta\_27531786\_nt7059\_L1\_Tile|1  
ATTCATTGGGTAGAAAATTTTATTTCAAGCTGGATTAACATAACATCTGTTAATGGTC  
>HPV92\_Beta\_27531786\_nt7064\_L1\_Tile|1  
TTGGGTAGAAAATTTTATTTCAAGCTGGATTAACATAACATCTGTTAATGGTCTTAAA  
>HPV92\_Beta\_27531786\_nt7069\_L1\_Tile|1  
TAGAAAATTTTATTTCAAGCTGGATTAACATAACATCTGTTAATGGTCTTAAAAGAAC  
>HPV92\_Beta\_27531786\_nt7074\_L1\_Tile|1  
AATTTTTATTTCAAGCTGGATTAACATAACATCTGTTAATGGTCTTAAAAGAACTAGAA  
>HPV92\_Beta\_27531786\_nt7084\_L1\_Tile|1  
TCAAGCTGGATTAACATAACATCTGTTAATGGTCTTAAAAGAACTAGAAGCAGTTCTCA  
>HPV92\_Beta\_27531786\_nt7089\_L1\_Tile|1  
CTGGATTAACATAACATCTGTTAATGGTCTTAAAAGAACTAGAAGCAGTTCTCAAAGAG  
>HPV92\_Beta\_27531786\_nt7094\_L1\_Tile|1  
TTAATAACATCTGTTAATGGTCTTAAAAGAACTAGAAGCAGTTCTCAAAGAGGTACT  
>HPV92\_Beta\_27531786\_nt7099\_L1\_Tile|1  
TAATAACATCTGTTAATGGTCTTAAAAGAACTAGAAGCAGTTCTCAAAGAGGTACTAAACG  
>HPV92\_Beta\_27531786\_nt7104\_L1\_Tile|1  
CATCTGTTAATGGTCTTAAAAGAACTAGAAGCAGTTCTCAAAGAGGTACTAAACGAAAAA  
>HPV92\_Beta\_27531786\_nt7109\_L1\_Tile|1  
GTTAATGGTCTTAAAAGAACTAGAAGCAGTTCTCAAAGAGGTACTAAACGAAAAAGAAAA  
>HPV92\_Beta\_27531786\_nt7114\_L1\_Tile|1  
TGGTCTTAAAAGAACTAGAAGCAGTTCTCAAAGAGGTACTAAACGAAAAAGAAAAAGTAA  
>HPV92\_Beta\_27531786\_nt7118\_L1\_Tile|1  
CTTAAAAGAACTAGAAGCAGTTCTCAAAGAGGTACTAAACGAAAAAGAAAAAGTAACTAA  
>HPV93\_Beta\_37089393\_nt5771\_L1\_Tile|1  
TAACAGTAGGTCACCCATATTACAATGTTTACAATAATAATGGAACAGTATTGGAAGTAC  
>HPV93\_Beta\_37089393\_nt5776\_L1\_Tile|1  
GTAGGTCACCCATATTACAATGTTTACAATAATAATGGAACAGTATTGGAAGTACCAAAG  
>HPV93\_Beta\_37089393\_nt6016\_L1\_Tile|1  
AAGGTAAATGATACAGAAAATCCTTTAAATTACAGAACTCAGGCATTTTCTACTGATGAT  
>HPV93\_Beta\_37089393\_nt6146\_L1\_Tile|1  
AACACTGGGATGTTGCACCTAAATGTGATGGAGCCAATGACCAAAATGGGATTTGCCAC  
>HPV93\_Beta\_37089393\_nt6151\_L1\_Tile|1  
TGGGATGTTGCACCTAAATGTGATGGAGCCAATGACCAAAATGGGATTTGCCACCTATA  
>HPV93\_Beta\_37089393\_nt6161\_L1\_Tile|1  
CACCTAAATGTGATGGAGCCAATGACCAAAATGGGATTTGCCACCTATACAATTAGTAA  
>HPV93\_Beta\_37089393\_nt6166\_L1\_Tile|1  
AAATGTGATGGAGCCAATGACCAAAATGGGATTTGCCACCTATACAATTAGTAAACACT  
>HPV93\_Beta\_37089393\_nt6176\_L1\_Tile|1  
GAGCCAATGACCAAAATGGGATTTGCCACCTATACAATTAGTAAACACTGTTATTCAAG  
>HPV93\_Beta\_37089393\_nt6206\_L1\_Tile|1  
CTATACAATTAGTAAACACTGTTATTCAAGATGGGGATATGGCAGATATCGGGTATGGTA  
>HPV93\_Beta\_37089393\_nt6211\_L1\_Tile|1  
CAATTAGTAAACACTGTTATTCAAGATGGGGATATGGCAGATATCGGGTATGGTAATCTT  
>HPV93\_Beta\_37089393\_nt6236\_L1\_Tile|1  
ATGGGGATATGGCAGATATCGGGTATGGTAATCTTAATTTTAAGGCTTTGCAGGAAAATA  
>HPV93\_Beta\_37089393\_nt6251\_L1\_Tile|1  
ATATCGGGTATGGTAATCTTAATTTTAAGGCTTTGCAGGAAAATAGATCTGATGTTAGTC  
>HPV93\_Beta\_37089393\_nt6256\_L1\_Tile|1  
GGGTATGGTAATCTTAATTTTAAGGCTTTGCAGGAAAATAGATCTGATGTTAGTCTTGAC  
>HPV93\_Beta\_37089393\_nt6421\_L1\_Tile|1  
CACTTTTTTGTAAAGAGGTGGCAACGTAGGAGATGACATTCCTGGTGAACAAATAGACGCA  
>HPV93\_Beta\_37089393\_nt6426\_L1\_Tile|1  
TTTTGTAAAGAGGTGGCAACGTAGGAGATGACATTCCTGGTGAACAAATAGACGCAGGCAC  
>HPV93\_Beta\_37089393\_nt6431\_L1\_Tile|1

TAAGAGGTGGCAACGTAGGAGATGACATTCCTGGTGAACAAATAGACGCAGGCACATATA  
>HPV93\_Beta\_37089393\_nt6436\_L1\_Tile|1  
GGTGGCAACGTAGGAGATGACATTCCTGGTGAACAAATAGACGCAGGCACATATAAAAAAT  
>HPV93\_Beta\_37089393\_nt6441\_L1\_Tile|1  
CAACGTAGGAGATGACATTCCTGGTGAACAAATAGACGCAGGCACATATAAAAAATGATTT  
>HPV93\_Beta\_37089393\_nt6446\_L1\_Tile|1  
TAGGAGATGACATTCCTGGTGAACAAATAGACGCAGGCACATATAAAAAATGATTTTTTACA  
>HPV93\_Beta\_37089393\_nt6681\_L1\_Tile|1  
TG TAGACAACACAAGAAACACAAACTTCAGTATTAGTGTTTATACAGACCCTGGGAAAAT  
>HPV93\_Beta\_37089393\_nt6686\_L1\_Tile|1  
ACAACACAAGAAACACAAACTTCAGTATTAGTGTTTATACAGACCCTGGGAAAATAAGGG  
>HPV93\_Beta\_37089393\_nt6691\_L1\_Tile|1  
ACAAGAAACACAAACTTCAGTATTAGTGTTTATACAGACCCTGGGAAAATAAGGGATATA  
>HPV93\_Beta\_37089393\_nt6696\_L1\_Tile|1  
AAACACAAACTTCAGTATTAGTGTTTATACAGACCCTGGGAAAATAAGGGATATAAATGA  
>HPV93\_Beta\_37089393\_nt6891\_L1\_Tile|1  
AGAGGAATGGCAATTAGGGTTTGTCCCAACTCCAGACAATCCGTTACAGAGTACTTATCG  
>HPV93\_Beta\_37089393\_nt6896\_L1\_Tile|1  
AATGGCAATTAGGGTTTGTCCCAACTCCAGACAATCCGTTACAGAGTACTTATCGATATA  
>HPV93\_Beta\_37089393\_nt6901\_L1\_Tile|1  
CAATTAGGGTTTGTCCCAACTCCAGACAATCCGTTACAGAGTACTTATCGATATATTAAT  
>HPV93\_Beta\_37089393\_nt6906\_L1\_Tile|1  
AGGGTTTGTCCCAACTCCAGACAATCCGTTACAGAGTACTTATCGATATATTAATAGTTT  
>HPV93\_Beta\_37089393\_nt6911\_L1\_Tile|1  
TTGTCCCAACTCCAGACAATCCGTTACAGAGTACTTATCGATATATTAATAGTTT TAGCTA  
>HPV93\_Beta\_37089393\_nt6916\_L1\_Tile|1  
CCA ACTCCAGACAATCCGTTACAGAGTACTTATCGATATATTAATAGTTT TAGCTACACCA  
>HPV93\_Beta\_37089393\_nt6921\_L1\_Tile|1  
TCCAGACAATCCGTTACAGAGTACTTATCGATATATTAATAGTTT TAGCTACACCATGTCC  
>HPV93\_Beta\_37089393\_nt6926\_L1\_Tile|1  
ACAATCCGTTACAGAGTACTTATCGATATATTAATAGTTT TAGCTACACCATGTCCCGATA  
>HPV93\_Beta\_37089393\_nt6931\_L1\_Tile|1  
CCGTTACAGAGTACTTATCGATATATTAATAGTTT TAGCTACACCATGTCCCGATAAGGTT  
>HPV93\_Beta\_37089393\_nt6941\_L1\_Tile|1  
GTACTTATCGATATATTAATAGTTT TAGCTACACCATGTCCCGATAAGGTTCCACCAAAGG  
>HPV93\_Beta\_37089393\_nt6951\_L1\_Tile|1  
ATATATTAATAGTTT TAGCTACACCATGTCCCGATAAGGTTCCACCAAAGGAAAAGGAAGA  
>HPV93\_Beta\_37089393\_nt7066\_L1\_Tile|1  
GATCTAGATCAATACTCCTTAGGGCGCAAATTTCTGTATCAGGCAAATCTTG TACAATCA  
>HPV93\_Beta\_37089393\_nt7076\_L1\_Tile|1  
AATACTCCTTAGGGCGCAAATTTCTGTATCAGGCAAATCTTG TACAATCACCAGCTAAAC  
>HPV93\_Beta\_37089393\_nt7086\_L1\_Tile|1  
AGGGCGCAAATTTCTGTATCAGGCAAATCTTG TACAATCACCAGCTAAACGGTCATCATC  
>HPV93\_Beta\_37089393\_nt7091\_L1\_Tile|1  
GCAAATTTCTGTATCAGGCAAATCTTG TACAATCACCAGCTAAACGGTCATCATCTATTT  
>HPV93\_Beta\_37089393\_nt7096\_L1\_Tile|1  
TTTCTGTATCAGGCAAATCTTG TACAATCACCAGCTAAACGGTCATCATCTATTTCTCGA  
>HPV93\_Beta\_37089393\_nt7101\_L1\_Tile|1  
GTATCAGGCAAATCTTG TACAATCACCAGCTAAACGGTCATCATCTATTTCTCGAGGAAC  
>HPV93\_Beta\_37089393\_nt7111\_L1\_Tile|1  
AATCTTG TACAATCACCAGCTAAACGGTCATCATCTATTTCTCGAGGA ACTAAAAGAAAA  
>HPV93\_Beta\_37089393\_nt7121\_L1\_Tile|1  
AATCACCAGCTAAACGGTCATCATCTATTTCTCGAGGA ACTAAAAGAAAAAGCAAAAT  
>HPV93\_Beta\_37089393\_nt7123\_L1\_Tile|1  
TCACCAGCTAAACGGTCATCATCTATTTCTCGAGGA ACTAAAAGAAAAAGCAAAATAA



>HPV94\_Alpha\_40804528\_nt6540\_L1\_Tile|1  
TTGCAAGACATTTTTTCAATAGAGCCAGTGCAGTGGGAGACACCATTCCCTGACACTCTAA  
>HPV94\_Alpha\_40804528\_nt6545\_L1\_Tile|1  
AGACATTTTTTCAATAGAGCCAGTGCAGTGGGAGACACCATTCCCTGACACTCTAATATTG  
>HPV94\_Alpha\_40804528\_nt6550\_L1\_Tile|1  
TTTTTTCATAGAGCCAGTGCAGTGGGAGACACCATTCCCTGACACTCTAATATTGAAGTC  
>HPV94\_Alpha\_40804528\_nt6555\_L1\_Tile|1  
TCAATAGAGCCAGTGCAGTGGGAGACACCATTCCCTGACACTCTAATATTGAAGTCGGCCG  
>HPV94\_Alpha\_40804528\_nt6575\_L1\_Tile|1  
GGAGACACCATTCCCTGACACTCTAATATTGAAGTCGGCCGGTGGTGACCAAAACGTTGGT  
>HPV94\_Alpha\_40804528\_nt7035\_L1\_Tile|1  
TCTTGTCGTCCCTCCGCAATAACTTGTGCAAGGAGGCACCCCCACTGAAAAGCAAGATC  
>HPV95\_Gamma\_40804520\_nt5534\_L1\_Tile|1  
GTAGGTGAACCTAAGAAAGTTTTAGTTCCAAAGGTATCTGGAAGTCAATATAGAGTCTTT  
>HPV95\_Gamma\_40804520\_nt5539\_L1\_Tile|1  
TGAACCTAAGAAAGTTTTAGTTCCAAAGGTATCTGGAAGTCAATATAGAGTCTTTAGGTT  
>HPV95\_Gamma\_40804520\_nt5544\_L1\_Tile|1  
CTAAGAAAGTTTTAGTTCCAAAGGTATCTGGAAGTCAATATAGAGTCTTTAGGTTTCAAT  
>HPV95\_Gamma\_40804520\_nt5579\_L1\_Tile|1  
CAATATAGAGTCTTTAGGTTTCAATTGCCAGATCCTAACAGATTTGCTTTGATAGATAAT  
>HPV95\_Gamma\_40804520\_nt5624\_L1\_Tile|1  
GCTTTGATAGATAATGGCTTTTATGACTCTGACCATGAAAGGTTAGTATGGCGTCTAAGA  
>HPV95\_Gamma\_40804520\_nt5629\_L1\_Tile|1  
GATAGATAATGGCTTTTATGACTCTGACCATGAAAGGTTAGTATGGCGTCTAAGAGGAAT  
>HPV95\_Gamma\_40804520\_nt5634\_L1\_Tile|1  
ATAATGGCTTTTATGACTCTGACCATGAAAGGTTAGTATGGCGTCTAAGAGGAATTGAAA  
>HPV95\_Gamma\_40804520\_nt5654\_L1\_Tile|1  
GACCATGAAAGGTTAGTATGGCGTCTAAGAGGAATTGAAATAGGCCGAGGTGGACCTTTA  
>HPV95\_Gamma\_40804520\_nt5804\_L1\_Tile|1  
CAGGATGTCTCATTAGACCCTAAACAGACCCAAATGTTTCATAATTGGTTGTATTCCAGCT  
>HPV95\_Gamma\_40804520\_nt5839\_L1\_Tile|1  
GTTTCATAATTGGTTGTATTCCAGCTATTGGGGAGCACTGGGATAAAGCTGAGGCATGCAG  
>HPV95\_Gamma\_40804520\_nt5844\_L1\_Tile|1  
TAATTGGTTGTATTCCAGCTATTGGGGAGCACTGGGATAAAGCTGAGGCATGCAGAGAAC  
>HPV95\_Gamma\_40804520\_nt5894\_L1\_Tile|1  
TGCAGAGAACCAGCACCTCAGAAGGGTGATTGCCACCTATAGAACTTGTAACACATAC  
>HPV95\_Gamma\_40804520\_nt6014\_L1\_Tile|1  
GATGATAAATCCAGTGCACCATTAGATGTAGTTGGTACTTTGTGTAAATGGCCTGACTTC  
>HPV95\_Gamma\_40804520\_nt6019\_L1\_Tile|1  
TAAATCCAGTGCACCATTAGATGTAGTTGGTACTTTGTGTAAATGGCCTGACTTCTTAAA  
>HPV95\_Gamma\_40804520\_nt6034\_L1\_Tile|1  
ATTAGATGTAGTTGGTACTTTGTGTAAATGGCCTGACTTCTTAAAGATGAGTAAGGACAT  
>HPV95\_Gamma\_40804520\_nt6039\_L1\_Tile|1  
ATGTAGTTGGTACTTTGTGTAAATGGCCTGACTTCTTAAAGATGAGTAAGGACATTTATG  
>HPV95\_Gamma\_40804520\_nt6044\_L1\_Tile|1  
GTTGGTACTTTGTGTAAATGGCCTGACTTCTTAAAGATGAGTAAGGACATTTATGGTGAC  
>HPV95\_Gamma\_40804520\_nt6049\_L1\_Tile|1  
TACTTTGTGTAAATGGCCTGACTTCTTAAAGATGAGTAAGGACATTTATGGTGACAGTTT  
>HPV95\_Gamma\_40804520\_nt6054\_L1\_Tile|1  
TGTGTAAATGGCCTGACTTCTTAAAGATGAGTAAGGACATTTATGGTGACAGTTTATTCT  
>HPV95\_Gamma\_40804520\_nt6064\_L1\_Tile|1  
GCCTGACTTCTTAAAGATGAGTAAGGACATTTATGGTGACAGTTTATTCTTCTTTGGCCG  
>HPV95\_Gamma\_40804520\_nt6069\_L1\_Tile|1  
ACTTCTTAAAGATGAGTAAGGACATTTATGGTGACAGTTTATTCTTCTTTGGCCGAAGGG  
>HPV95\_Gamma\_40804520\_nt6074\_L1\_Tile|1

TTAAAGATGAGTAAGGACATTTATGGTGACAGTTTATTCTTCTTTGGCCGAAGGGAACAG  
>HPV95\_Gamma\_40804520\_nt6079\_L1\_Tile|1  
GATGAGTAAGGACATTTATGGTGACAGTTTATTCTTCTTTGGCCGAAGGGAACAGCTTTA  
>HPV95\_Gamma\_40804520\_nt6084\_L1\_Tile|1  
GTAAGGACATTTATGGTGACAGTTTATTCTTCTTTGGCCGAAGGGAACAGCTTTATGCAA  
>HPV95\_Gamma\_40804520\_nt6094\_L1\_Tile|1  
TTATGGTGACAGTTTATTCTTCTTTGGCCGAAGGGAACAGCTTTATGCAAGACACTTTTT  
>HPV95\_Gamma\_40804520\_nt6099\_L1\_Tile|1  
GTGACAGTTTATTCTTCTTTGGCCGAAGGGAACAGCTTTATGCAAGACACTTTTTTGTTA  
>HPV95\_Gamma\_40804520\_nt6104\_L1\_Tile|1  
AGTTTATTCTTCTTTGGCCGAAGGGAACAGCTTTATGCAAGACACTTTTTTGTTAGAGCT  
>HPV95\_Gamma\_40804520\_nt6109\_L1\_Tile|1  
ATTCTTCTTTGGCCGAAGGGAACAGCTTTATGCAAGACACTTTTTTGTTAGAGCTGGGAC  
>HPV95\_Gamma\_40804520\_nt6149\_L1\_Tile|1  
TTTTTTGTTAGAGCTGGGACAATGGGTGATGCGTTACCAGAGCCTTTTGAAGTGAAGTCT  
>HPV95\_Gamma\_40804520\_nt6154\_L1\_Tile|1  
TGTTAGAGCTGGGACAATGGGTGATGCGTTACCAGAGCCTTTTGAAGTGAAGTCTGATTA  
>HPV95\_Gamma\_40804520\_nt6159\_L1\_Tile|1  
GAGCTGGGACAATGGGTGATGCGTTACCAGAGCCTTTTGAAGTGAAGTCTGATTACATAA  
>HPV95\_Gamma\_40804520\_nt6164\_L1\_Tile|1  
GGGACAATGGGTGATGCGTTACCAGAGCCTTTTGAAGTGAAGTCTGATTACATAATTGCT  
>HPV95\_Gamma\_40804520\_nt6179\_L1\_Tile|1  
GCGTTACCAGAGCCTTTTGAAGTGAAGTCTGATTACATAATTGCTGCTCAGAGTAACCAA  
>HPV95\_Gamma\_40804520\_nt6189\_L1\_Tile|1  
AGCCTTTTGAAGTGAAGTCTGATTACATAATTGCTGCTCAGAGTAACCAAGAACAAAATA  
>HPV95\_Gamma\_40804520\_nt6194\_L1\_Tile|1  
TTTGAAGTGAAGTCTGATTACATAATTGCTGCTCAGAGTAACCAAGAACAAAATAATCTT  
>HPV95\_Gamma\_40804520\_nt6199\_L1\_Tile|1  
AGTGAAGTCTGATTACATAATTGCTGCTCAGAGTAACCAAGAACAAAATAATCTTGGCCC  
>HPV95\_Gamma\_40804520\_nt6209\_L1\_Tile|1  
GATTACATAATTGCTGCTCAGAGTAACCAAGAACAAAATAATCTTGGCCCTCACATTTAT  
>HPV95\_Gamma\_40804520\_nt6214\_L1\_Tile|1  
CATAATTGCTGCTCAGAGTAACCAAGAACAAAATAATCTTGGCCCTCACATTTATTTTGG  
>HPV95\_Gamma\_40804520\_nt6219\_L1\_Tile|1  
TTGCTGCTCAGAGTAACCAAGAACAAAATAATCTTGGCCCTCACATTTATTTTGGAACTC  
>HPV95\_Gamma\_40804520\_nt6224\_L1\_Tile|1  
GCTCAGAGTAACCAAGAACAAAATAATCTTGGCCCTCACATTTATTTTGGAACTCCTAGC  
>HPV95\_Gamma\_40804520\_nt6229\_L1\_Tile|1  
GAGTAACCAAGAACAAAATAATCTTGGCCCTCACATTTATTTTGGAACTCCTAGCGGTTCT  
>HPV95\_Gamma\_40804520\_nt6234\_L1\_Tile|1  
ACCAAGAACAAAATAATCTTGGCCCTCACATTTATTTTGGAACTCCTAGCGGTTCTCTTG  
>HPV95\_Gamma\_40804520\_nt6239\_L1\_Tile|1  
GAACAAAATAATCTTGGCCCTCACATTTATTTTGGAACTCCTAGCGGTTCTCTTGTATCA  
>HPV95\_Gamma\_40804520\_nt6244\_L1\_Tile|1  
AAATAATCTTGGCCCTCACATTTATTTTGGAACTCCTAGCGGTTCTCTTGTATCAAGTGA  
>HPV95\_Gamma\_40804520\_nt6249\_L1\_Tile|1  
ATCTTGGCCCTCACATTTATTTTGGAACTCCTAGCGGTTCTCTTGTATCAAGTGAATCTC  
>HPV95\_Gamma\_40804520\_nt6259\_L1\_Tile|1  
TCACATTTATTTTGGAACTCCTAGCGGTTCTCTTGTATCAAGTGAATCTCAGCTTTTTTAA  
>HPV95\_Gamma\_40804520\_nt6264\_L1\_Tile|1  
TTTATTTTGGAACTCCTAGCGGTTCTCTTGTATCAAGTGAATCTCAGCTTTTTTAACCGAC  
>HPV95\_Gamma\_40804520\_nt6269\_L1\_Tile|1  
TTTGGAACTCCTAGCGGTTCTCTTGTATCAAGTGAATCTCAGCTTTTTTAACCGACCGTAT  
>HPV95\_Gamma\_40804520\_nt6274\_L1\_Tile|1  
AACTCCTAGCGGTTCTCTTGTATCAAGTGAATCTCAGCTTTTTTAACCGACCGTATTGGTT

>HPV95\_Gamma\_40804520\_nt6364\_L1\_Tile|1  
TTGTTGGGATAATCAGCTTTTTGTAACTCTGGTTGATAATACCCATAACACTAACTTTAC  
>HPV95\_Gamma\_40804520\_nt6369\_L1\_Tile|1  
GGGATAATCAGCTTTTTGTAACTCTGGTTGATAATACCCATAACACTAACTTTACTATTT  
>HPV95\_Gamma\_40804520\_nt6374\_L1\_Tile|1  
AATCAGCTTTTTGTAACTCTGGTTGATAATACCCATAACACTAACTTTACTATTTCTGTA  
>HPV95\_Gamma\_40804520\_nt6384\_L1\_Tile|1  
TTGTAACCTCTGGTTGATAATACCCATAACACTAACTTTACTATTTCTGTAAAGCATGAAG  
>HPV95\_Gamma\_40804520\_nt6389\_L1\_Tile|1  
ACTCTGGTTGATAATACCCATAACACTAACTTTACTATTTCTGTAAAGCATGAAGGAGAG  
>HPV95\_Gamma\_40804520\_nt6394\_L1\_Tile|1  
GGTTGATAATACCCATAACACTAACTTTACTATTTCTGTAAAGCATGAAGGAGAGGATAA  
>HPV95\_Gamma\_40804520\_nt6399\_L1\_Tile|1  
ATAATACCCATAACACTAACTTTACTATTTCTGTAAAGCATGAAGGAGAGGATAACAATT  
>HPV95\_Gamma\_40804520\_nt6404\_L1\_Tile|1  
ACCCATAACACTAACTTTACTATTTCTGTAAAGCATGAAGGAGAGGATAACAATTATACA  
>HPV95\_Gamma\_40804520\_nt6409\_L1\_Tile|1  
TAACACTAACTTTACTATTTCTGTAAAGCATGAAGGAGAGGATAACAATTATACATATAA  
>HPV95\_Gamma\_40804520\_nt6414\_L1\_Tile|1  
CTAACTTTACTATTTCTGTAAAGCATGAAGGAGAGGATAACAATTATACATATAAAGCAA  
>HPV95\_Gamma\_40804520\_nt6419\_L1\_Tile|1  
TTTACTATTTCTGTAAAGCATGAAGGAGAGGATAACAATTATACATATAAAGCAAATGAT  
>HPV95\_Gamma\_40804520\_nt6424\_L1\_Tile|1  
TATTTCTGTAAAGCATGAAGGAGAGGATAACAATTATACATATAAAGCAAATGATTTTAA  
>HPV95\_Gamma\_40804520\_nt6429\_L1\_Tile|1  
CTGTAAAGCATGAAGGAGAGGATAACAATTATACATATAAAGCAAATGATTTTAAACAGT  
>HPV95\_Gamma\_40804520\_nt6434\_L1\_Tile|1  
AAGCATGAAGGAGAGGATAACAATTATACATATAAAGCAAATGATTTTAAACAGTATTTA  
>HPV95\_Gamma\_40804520\_nt6539\_L1\_Tile|1  
AGAGTGCCCTCTTACAGCAGATGTAATGGCTCATTTGAATGTCATGAACCCAAATATATTA  
>HPV95\_Gamma\_40804520\_nt6544\_L1\_Tile|1  
GCCTCTTACAGCAGATGTAATGGCTCATTTGAATGTCATGAACCCAAATATATTAGATAA  
>HPV95\_Gamma\_40804520\_nt6624\_L1\_Tile|1  
CCCCACCACCTTCTGGTATTGAGGATCAATACAGATTTCATTACATCCAGAGCTACTCGTT  
>HPV95\_Gamma\_40804520\_nt6644\_L1\_Tile|1  
GAGGATCAATACAGATTTCATTACATCCAGAGCTACTCGTTGTCCAACCTCAAAATCCACCA  
>HPV95\_Gamma\_40804520\_nt6649\_L1\_Tile|1  
TCAATACAGATTTCATTACATCCAGAGCTACTCGTTGTCCAACCTCAAAATCCACCAGCAGA  
>HPV95\_Gamma\_40804520\_nt6654\_L1\_Tile|1  
ACAGATTTCATTACATCCAGAGCTACTCGTTGTCCAACCTCAAAATCCACCAGCAGAAAGAG  
>HPV95\_Gamma\_40804520\_nt6659\_L1\_Tile|1  
TTCATTACATCCAGAGCTACTCGTTGTCCAACCTCAAAATCCACCAGCAGAAAGAGAAGAC  
>HPV95\_Gamma\_40804520\_nt6679\_L1\_Tile|1  
TCGTTGTCCAACCTCAAAATCCACCAGCAGAAAGAGAAGACCCTTTTAAAGATTTGTCCTT  
>HPV95\_Gamma\_40804520\_nt6694\_L1\_Tile|1  
AAATCCACCAGCAGAAAGAGAAGACCCTTTTAAAGATTTGTCCTTTTGGACAGTTGATCT  
>HPV95\_Gamma\_40804520\_nt6699\_L1\_Tile|1  
CACCAGCAGAAAGAGAAGACCCTTTTAAAGATTTGTCCTTTTGGACAGTTGATCTTTCTG  
>HPV95\_Gamma\_40804520\_nt6704\_L1\_Tile|1  
GCAGAAAGAGAAGACCCTTTTAAAGATTTGTCCTTTTGGACAGTTGATCTTTCTGAGCGT  
>HPV95\_Gamma\_40804520\_nt6709\_L1\_Tile|1  
AAGAGAAGACCCTTTTAAAGATTTGTCCTTTTGGACAGTTGATCTTTCTGAGCGTTTTTC  
>HPV95\_Gamma\_40804520\_nt6714\_L1\_Tile|1  
AAGACCCTTTTAAAGATTTGTCCTTTTGGACAGTTGATCTTTCTGAGCGTTTTCTTCAG  
>HPV95\_Gamma\_40804520\_nt6724\_L1\_Tile|1

TAAAGATTTGTCCTTTTGGACAGTTGATCTTTCTGAGCGTTTTTCTTCAGAATTAAGCCA  
>HPV95\_Gamma\_40804520\_nt6734\_L1\_Tile|1  
TCCTTTTGGACAGTTGATCTTTCTGAGCGTTTTTCTTCAGAATTAAGCCAATTTTCATTA  
>HPV95\_Gamma\_40804520\_nt6739\_L1\_Tile|1  
TTGGACAGTTGATCTTTCTGAGCGTTTTTCTTCAGAATTAAGCCAATTTTCATTAGGAAG  
>HPV95\_Gamma\_40804520\_nt6749\_L1\_Tile|1  
GATCTTTCTGAGCGTTTTTCTTCAGAATTAAGCCAATTTTCATTAGGAAGGCGGTTTCTC  
>HPV95\_Gamma\_40804520\_nt6784\_L1\_Tile|1  
ATTTTCATTAGGAAGGCGGTTTCTCTATCAGAGTGGATTAATAAATGGATCTCGTAAAAG  
>HPV95\_Gamma\_40804520\_nt6789\_L1\_Tile|1  
CATTAGGAAGGCGGTTTCTCTATCAGAGTGGATTAATAAATGGATCTCGTAAAAGACAAA  
>HPV95\_Gamma\_40804520\_nt6794\_L1\_Tile|1  
GGAAGGCGGTTTCTCTATCAGAGTGGATTAATAAATGGATCTCGTAAAAGACAAAGAGCT  
>HPV95\_Gamma\_40804520\_nt6799\_L1\_Tile|1  
GCGGTTTCTCTATCAGAGTGGATTAATAAATGGATCTCGTAAAAGACAAAGAGCTATTAC  
>HPV95\_Gamma\_40804520\_nt6804\_L1\_Tile|1  
TTCTCTATCAGAGTGGATTAATAAATGGATCTCGTAAAAGACAAAGAGCTATTACTTCTC  
>HPV95\_Gamma\_40804520\_nt6809\_L1\_Tile|1  
TATCAGAGTGGATTAATAAATGGATCTCGTAAAAGACAAAGAGCTATTACTTCTCAAAC  
>HPV95\_Gamma\_40804520\_nt6819\_L1\_Tile|1  
GATTAATAAATGGATCTCGTAAAAGACAAAGAGCTATTACTTCTCAAACGCAACAGGCA  
>HPV95\_Gamma\_40804520\_nt6829\_L1\_Tile|1  
TGGATCTCGTAAAAGACAAAGAGCTATTACTTCTCAAACGCAACAGGCACAAAACGTTT  
>HPV96\_Beta\_50253426\_nt5987\_L1\_Tile|1  
TGTTAAACAGTAGGACATCCTTATTTTGATGTGAGGAAAAATAATGGAGATCATGAAGTGT  
>HPV96\_Beta\_50253426\_nt5992\_L1\_Tile|1  
ACAGTAGGACATCCTTATTTTGATGTGAGGAAAAATAATGGAGATCATGAAGTGTAGTT  
>HPV96\_Beta\_50253426\_nt5997\_L1\_Tile|1  
AGGACATCCTTATTTTGATGTGAGGAAAAATAATGGAGATCATGAAGTGTAGTTCCCAA  
>HPV96\_Beta\_50253426\_nt6002\_L1\_Tile|2  
ATCCTTATTTTGATGTGAGGAAAAATAATGGAGATCATGAAGTGTAGTTCCCAAGGTGT  
>HPV96\_Beta\_50253426\_nt6222\_L1\_Tile|2  
ACATCCATTATTTAACAAGGTGAAAGACACGGAAAATCCAAATGGCTATAATACAGGTGG  
>HPV96\_Beta\_50253426\_nt6252\_L1\_Tile|1  
GGAAAATCCAAATGGCTATAATACAGGTGGAAGGATGATAGGGTGAATACATCCTTTGA  
>HPV96\_Beta\_50253426\_nt6257\_L1\_Tile|1  
ATCCAAATGGCTATAATACAGGTGGAAGGATGATAGGGTGAATACATCCTTTGATCCCA  
>HPV96\_Beta\_50253426\_nt6367\_L1\_Tile|1  
TGGGACAAGGCTTACCTTGTGTAGAAAATCCTCCTGATCAGGGAGCGTGTCCACCTCTA  
>HPV96\_Beta\_50253426\_nt6377\_L1\_Tile|1  
CCTTACCTTGTGTAGAAAATCCTCCTGATCAGGGAGCGTGTCCACCTCTAGAATTAAAAA  
>HPV96\_Beta\_50253426\_nt6382\_L1\_Tile|2  
CCTTGTGTAGAAAATCCTCCTGATCAGGGAGCGTGTCCACCTCTAGAATTAAAAAATACT  
>HPV96\_Beta\_50253426\_nt6387\_L1\_Tile|1  
TGTAGAAAATCCTCCTGATCAGGGAGCGTGTCCACCTCTAGAATTAAAAAATACTATTAT  
>HPV96\_Beta\_50253426\_nt6487\_L1\_Tile|1  
AATTTTAAACATTATCAGTCACTAAGTCTGATGTTAGTCTGGATATTGTTAATGAAATT  
>HPV96\_Beta\_50253426\_nt6632\_L1\_Tile|1  
CCAGACATATGTTTTGTAGAGGTGGGTGAGTGGAGACAGTATTCCAGATGATGCAGTTG  
>HPV96\_Beta\_50253426\_nt6637\_L1\_Tile|1  
CATATGTTTTGTAGAGGTGGGTGAGTGGAGACAGTATTCCAGATGATGCAGTTGGAGAA  
>HPV96\_Beta\_50253426\_nt6647\_L1\_Tile|1  
GTAGAGGTGGGTGAGTGGAGACAGTATTCCAGATGATGCAGTTGGAGAAGACAACCATT  
>HPV96\_Beta\_50253426\_nt6662\_L1\_Tile|2  
TAGGAGACAGTATTCCAGATGATGCAGTTGGAGAAGACAACCATTATTATTTAAAGGCTG

>HPV96\_Beta\_50253426\_nt6667\_L1\_Tile|1  
GACAGTATTCCAGATGATGCAGTTGGAGAAGACAACCATTATTATTTAAAGGCTGCCAGT  
>HPV96\_Beta\_50253426\_nt6672\_L1\_Tile|1  
TATTCCAGATGATGCAGTTGGAGAAGACAACCATTATTATTTAAAGGCTGCCAGTGATCA  
>HPV96\_Beta\_50253426\_nt6682\_L1\_Tile|2  
GATGCAGTTGGAGAAGACAACCATTATTATTTAAAGGCTGCCAGTGATCAAAACAGAGAT  
>HPV96\_Beta\_50253426\_nt6687\_L1\_Tile|1  
AGTTGGAGAAGACAACCATTATTATTTAAAGGCTGCCAGTGATCAAAACAGAGATACAAT  
>HPV96\_Beta\_50253426\_nt6692\_L1\_Tile|1  
GAGAAGACAACCATTATTATTTAAAGGCTGCCAGTGATCAAAACAGAGATACAATGGCAA  
>HPV96\_Beta\_50253426\_nt6697\_L1\_Tile|1  
GACAACCATTATTATTTAAAGGCTGCCAGTGATCAAAACAGAGATACAATGGCAAGTTCC  
>HPV96\_Beta\_50253426\_nt6702\_L1\_Tile|2  
CCATTATTATTTAAAGGCTGCCAGTGATCAAAACAGAGATACAATGGCAAGTTCCATTTA  
>HPV96\_Beta\_50253426\_nt6707\_L1\_Tile|1  
ATTATTTAAAGGCTGCCAGTGATCAAAACAGAGATACAATGGCAAGTTCCATTTACACTC  
>HPV96\_Beta\_50253426\_nt6727\_L1\_Tile|1  
GATCAAAACAGAGATACAATGGCAAGTTCCATTTACACTCCCACAGTCAGTGGATCTTTA  
>HPV96\_Beta\_50253426\_nt6732\_L1\_Tile|1  
AAACAGAGATACAATGGCAAGTTCCATTTACACTCCCACAGTCAGTGGATCTTTAGTTTC  
>HPV96\_Beta\_50253426\_nt6737\_L1\_Tile|1  
GAGATACAATGGCAAGTTCCATTTACACTCCCACAGTCAGTGGATCTTTAGTTTCTACAG  
>HPV96\_Beta\_50253426\_nt6742\_L1\_Tile|2  
ACAATGGCAAGTTCCATTTACACTCCCACAGTCAGTGGATCTTTAGTTTCTACAGATGCA  
>HPV96\_Beta\_50253426\_nt6747\_L1\_Tile|1  
GGCAAGTTCCATTTACACTCCCACAGTCAGTGGATCTTTAGTTTCTACAGATGCACAGAT  
>HPV96\_Beta\_50253426\_nt6757\_L1\_Tile|1  
ATTTACACTCCCACAGTCAGTGGATCTTTAGTTTCTACAGATGCACAGATTTTCAATAGG  
>HPV96\_Beta\_50253426\_nt6777\_L1\_Tile|1  
TGGATCTTTAGTTTCTACAGATGCACAGATTTTCAATAGGCCTTTTTGGCTGCAAAGGGC  
>HPV96\_Beta\_50253426\_nt6782\_L1\_Tile|2  
CTTTAGTTTCTACAGATGCACAGATTTTCAATAGGCCTTTTTGGCTGCAAAGGGCTCAAG  
>HPV96\_Beta\_50253426\_nt6862\_L1\_Tile|2  
TGGGGTAATCAAATCTTTCTCACAGTAATAGATAATACCAGGAATACTAATTTCTGTATC  
>HPV96\_Beta\_50253426\_nt6867\_L1\_Tile|1  
TAATCAAATCTTTCTCACAGTAATAGATAATACCAGGAATACTAATTTCTGTATCAGTGT  
>HPV96\_Beta\_50253426\_nt6877\_L1\_Tile|1  
TTTCTCACAGTAATAGATAATACCAGGAATACTAATTTCTGTATCAGTGTCTCCTCAAAT  
>HPV96\_Beta\_50253426\_nt6882\_L1\_Tile|2  
CACAGTAATAGATAATACCAGGAATACTAATTTCTGTATCAGTGTCTCCTCAAATGATCA  
>HPV96\_Beta\_50253426\_nt6887\_L1\_Tile|1  
TAATAGATAATACCAGGAATACTAATTTCTGTATCAGTGTCTCCTCAAATGATCAGGCAT  
>HPV96\_Beta\_50253426\_nt6892\_L1\_Tile|1  
GATAATACCAGGAATACTAATTTCTGTATCAGTGTCTCCTCAAATGATCAGGCATTACAG  
>HPV96\_Beta\_50253426\_nt6897\_L1\_Tile|1  
TACCAGGAATACTAATTTCTGTATCAGTGTCTCCTCAAATGATCAGGCATTACAGGAATA  
>HPV96\_Beta\_50253426\_nt6902\_L1\_Tile|2  
GGAATACTAATTTCTGTATCAGTGTCTCCTCAAATGATCAGGCATTACAGGAATACAATA  
>HPV96\_Beta\_50253426\_nt6907\_L1\_Tile|1  
ACTAATTTCTGTATCAGTGTCTCCTCAAATGATCAGGCATTACAGGAATACAATACTGCA  
>HPV96\_Beta\_50253426\_nt6912\_L1\_Tile|1  
TTTCTGTATCAGTGTCTCCTCAAATGATCAGGCATTACAGGAATACAATACTGCAAACCTT  
>HPV96\_Beta\_50253426\_nt6917\_L1\_Tile|1  
GTATCAGTGTCTCCTCAAATGATCAGGCATTACAGGAATACAATACTGCAAACCTTTAGAG  
>HPV96\_Beta\_50253426\_nt6922\_L1\_Tile|2

AGTGTCTCCTCAAATGATCAGGCATTACAGGAATACAATACTGCAAACCTTAGAGAATAT  
>HPV96\_Beta\_50253426\_nt6927\_L1\_Tile|1  
CTCCTCAAATGATCAGGCATTACAGGAATACAATACTGCAAACCTTAGAGAATATTTGAG  
>HPV96\_Beta\_50253426\_nt6932\_L1\_Tile|1  
CAAATGATCAGGCATTACAGGAATACAATACTGCAAACCTTAGAGAATATTTGAGACATG  
>HPV96\_Beta\_50253426\_nt6987\_L1\_Tile|1  
ACATGTAGAAGAGTATGAATTATCCTTTATATTACAATTATGTAAAGTTCCATTAGAGCC  
>HPV96\_Beta\_50253426\_nt6992\_L1\_Tile|1  
TAGAAGAGTATGAATTATCCTTTATATTACAATTATGTAAAGTTCCATTAGAGCCAGAAG  
>HPV96\_Beta\_50253426\_nt6997\_L1\_Tile|1  
GAGTATGAATTATCCTTTATATTACAATTATGTAAAGTTCCATTAGAGCCAGAAGTATTA  
>HPV96\_Beta\_50253426\_nt7122\_L1\_Tile|2  
TGACAATCCCATCAATGATACATATAGATACATACATTTCAGCAGCCACACGGTGTCCAGA  
>HPV96\_Beta\_50253426\_nt7127\_L1\_Tile|1  
ATCCCATCAATGATACATATAGATACATACATTTCAGCAGCCACACGGTGTCCAGATAAAA  
>HPV96\_Beta\_50253426\_nt7132\_L1\_Tile|1  
ATCAATGATACATATAGATACATACATTTCAGCAGCCACACGGTGTCCAGATAAACTACA  
>HPV96\_Beta\_50253426\_nt7182\_L1\_Tile|2  
TAAAACTACACCTAAAGAAAAAGCAGATCCCTTTGCAGGTTATCACTTTTGGGATGTTGA  
>HPV96\_Beta\_50253426\_nt7187\_L1\_Tile|1  
CTACACCTAAAGAAAAAGCAGATCCCTTTGCAGGTTATCACTTTTGGGATGTTGATTTGT  
>HPV96\_Beta\_50253426\_nt7197\_L1\_Tile|1  
AGAAAAAGCAGATCCCTTTGCAGGTTATCACTTTTGGGATGTTGATTTGTCTGAAAAGTT  
>HPV96\_Beta\_50253426\_nt7272\_L1\_Tile|1  
TCAGTATTCTCTGGGACGTAAATTCTTATTTCAAGCCAACCTGCAAAACAAAAGAGTTAA  
>HPV96\_Beta\_50253426\_nt7292\_L1\_Tile|1  
AATTCTTATTTCAAGCCAACCTGCAAAACAAAAGAGTTAACAGAGGGGTTACTGTAACCG  
>HPV96\_Beta\_50253426\_nt7297\_L1\_Tile|1  
TTATTTCAAGCCAACCTGCAAAACAAAAGAGTTAACAGAGGGGTTACTGTAACCGGGAGG  
>HPV96\_Beta\_50253426\_nt7302\_L1\_Tile|2  
TCAAGCCAACCTGCAAAACAAAAGAGTTAACAGAGGGGTTACTGTAACCGGGAGGGCTAC  
>HPV96\_Beta\_50253426\_nt7317\_L1\_Tile|1  
AAACAAAAGAGTTAACAGAGGGGTTACTGTAACCGGGAGGGCTACAACCTCAAGAGGTAC  
>HPV96\_Beta\_50253426\_nt7322\_L1\_Tile|2  
AAAGAGTTAACAGAGGGGTTACTGTAACCGGGAGGGCTACAACCTCAAGAGGTACAAAAC  
>HPV96\_Beta\_50253426\_nt7336\_L1\_Tile|1  
GGGGTTACTGTAACCGGGAGGGCTACAACCTCAAGAGGTACAAAACGAAAACGACGCTGA  
>HPV97\_Alpha\_71726694\_nt5612\_L1\_Tile|1  
TCTAGATTATTAGCTGTAGGCAATCCTTATTTTAAAGTTTCTAAAGGTGCAGGTAGTAGG  
>HPV97\_Alpha\_71726694\_nt5617\_L1\_Tile|1  
ATTATTAGCTGTAGGCAATCCTTATTTTAAAGTTTCTAAAGGTGCAGGTAGTAGGCAAGA  
>HPV97\_Alpha\_71726694\_nt5622\_L1\_Tile|2  
TAGCTGTAGGCAATCCTTATTTTAAAGTTTCTAAAGGTGCAGGTAGTAGGCAAGATGTTT  
>HPV97\_Alpha\_71726694\_nt5642\_L1\_Tile|2  
TTTAAAGTTTCTAAAGGTGCAGGTAGTAGGCAAGATGTTCCCAAAGTATCTGCCTACCAA  
>HPV97\_Alpha\_71726694\_nt5647\_L1\_Tile|1  
AGTTTCTAAAGGTGCAGGTAGTAGGCAAGATGTTCCCAAAGTATCTGCCTACCAATATAG  
>HPV97\_Alpha\_71726694\_nt5657\_L1\_Tile|1  
GGTGCAGGTAGTAGGCAAGATGTTCCCAAAGTATCTGCCTACCAATATAGAGTGTTTAGG  
>HPV97\_Alpha\_71726694\_nt5662\_L1\_Tile|2  
AGGTAGTAGGCAAGATGTTCCCAAAGTATCTGCCTACCAATATAGAGTGTTTAGGGTAAC  
>HPV97\_Alpha\_71726694\_nt5667\_L1\_Tile|1  
GTAGGCAAGATGTTCCCAAAGTATCTGCCTACCAATATAGAGTGTTTAGGGTAACCTTGC  
>HPV97\_Alpha\_71726694\_nt5857\_L1\_Tile|1  
TTTATATAACAAATTAGATGACACTGAAAGTTCACATGCTGCTACAGCTGTTGTTACACA

>HPV97\_Alpha\_71726694\_nt5982\_L1\_Tile|2  
CTGCTATTGGTGAACATTGGGCTAAAGGTACACCATGTAAATCTACTCACATACAGCAAG  
>HPV97\_Alpha\_71726694\_nt6017\_L1\_Tile|1  
TGTAATCTACTCACATACAGCAAGGTGACTGTCCTCCTTTAGAGCTTAAAAATACAGTG  
>HPV97\_Alpha\_71726694\_nt6287\_L1\_Tile|1  
GGAACAATGGGTGACACTATTCCACAGGAGTTATATATTAAAGGAACTGGTATGCGTGAA  
>HPV97\_Alpha\_71726694\_nt6302\_L1\_Tile|2  
ACTATTCCACAGGAGTTATATATTAAAGGAACTGGTATGCGTGAAACTCCTGGCAGTTTT  
>HPV97\_Alpha\_71726694\_nt6517\_L1\_Tile|1  
TTTAACACTGTGTGCTTCTACACAAAATGGCGTAGCTACCACATATGACCCTACAAAATA  
>HPV97\_Alpha\_71726694\_nt6522\_L1\_Tile|2  
CACTGTGTGCTTCTACACAAAATGGCGTAGCTACCACATATGACCCTACAAAATATAAAC  
>HPV97\_Alpha\_71726694\_nt6712\_L1\_Tile|1  
TGTCCACCGCCACCCACTACCAGTTTAGTAGATACATATCGCTTTGTACAGTCTGTTGC  
>HPV97\_Alpha\_71726694\_nt6717\_L1\_Tile|1  
CACCGCCACCCACTACCAGTTTAGTAGATACATATCGCTTTGTACAGTCTGTTGCTATAA  
>HPV97\_Alpha\_71726694\_nt6952\_L1\_Tile|1  
TTCTGCCCCGTCTGCCCTACTACTTCCAAACCTGCTAAGCGTTTACGTGTCCGTCGTAA  
>HPVFA75/KI88-03\_Unclassified\_206902429\_nt5666\_L1\_Tile|1  
TCAACTCCAGTAGCTAAGGTGTTAAGCACTGATGAATATGTAGAAAGAACTAACATATTT  
>HPVFA75/KI88-03\_Unclassified\_206902429\_nt6136\_L1\_Tile|1  
TGAGCCATGTGAAAATGCAGGAGATCAACAGGAAAATGTCCACCTATAGAACTGAAAAA  
>HPVFA75/KI88-03\_Unclassified\_206902429\_nt6141\_L1\_Tile|1  
CATGTGAAAATGCAGGAGATCAACAGGAAAATGTCCACCTATAGAACTGAAAAATTCTG  
>HPVFA75/KI88-03\_Unclassified\_206902429\_nt6166\_L1\_Tile|1  
GGGAAAATGTCCACCTATAGAACTGAAAAATTCTGTGATTCAAGATGGCGATATGATGGA  
>HPVFA75/KI88-03\_Unclassified\_206902429\_nt6186\_L1\_Tile|1  
AACTGAAAAATTCTGTGATTCAAGATGGCGATATGATGGACATTGGATTGGAAATATAA  
>HPVFA75/KI88-03\_Unclassified\_206902429\_nt6236\_L1\_Tile|1  
GGAAATATAAATTTTAAACTCTATCCCTGAATAGATCAGATGTTAGCTTAGATTTAGTA  
>HPVFA75/KI88-03\_Unclassified\_206902429\_nt6241\_L1\_Tile|1  
TATAAATTTTAAACTCTATCCCTGAATAGATCAGATGTTAGCTTAGATTTAGTAGACGA  
>HPVFA75/KI88-03\_Unclassified\_206902429\_nt6246\_L1\_Tile|1  
ATTTTAAACTCTATCCCTGAATAGATCAGATGTTAGCTTAGATTTAGTAGACGAAATTG  
>HPVFA75/KI88-03\_Unclassified\_206902429\_nt6251\_L1\_Tile|1  
AAACTCTATCCCTGAATAGATCAGATGTTAGCTTAGATTTAGTAGACGAAATTGCTAAA  
>HPVFA75/KI88-03\_Unclassified\_206902429\_nt6391\_L1\_Tile|1  
AAGACATTATTTTACCAGAGGAGGTAATGTTGGAGACGCTACTCCAGATGGAGCAAATAA  
>HPVFA75/KI88-03\_Unclassified\_206902429\_nt6396\_L1\_Tile|1  
ATTATTTTACCAGAGGAGGTAATGTTGGAGACGCTACTCCAGATGGAGCAAATAATCAAG  
>HPVFA75/KI88-03\_Unclassified\_206902429\_nt6401\_L1\_Tile|1  
TTTACCAGAGGAGGTAATGTTGGAGACGCTACTCCAGATGGAGCAAATAATCAAGATCAT  
>HPVFA75/KI88-03\_Unclassified\_206902429\_nt6406\_L1\_Tile|1  
CAGAGGAGGTAATGTTGGAGACGCTACTCCAGATGGAGCAAATAATCAAGATCATAAATT  
>HPVFA75/KI88-03\_Unclassified\_206902429\_nt6416\_L1\_Tile|1  
AATGTTGGAGACGCTACTCCAGATGGAGCAAATAATCAAGATCATAAATTTTATTACCT  
>HPVFA75/KI88-03\_Unclassified\_206902429\_nt6421\_L1\_Tile|1  
TGGAGACGCTACTCCAGATGGAGCAAATAATCAAGATCATAAATTTTATTACCTCCTAA  
>HPVFA75/KI88-03\_Unclassified\_206902429\_nt6426\_L1\_Tile|1  
ACGCTACTCCAGATGGAGCAAATAATCAAGATCATAAATTTTATTACCTCCTAAGTCAT  
>HPVFA75/KI88-03\_Unclassified\_206902429\_nt6436\_L1\_Tile|1  
AGATGGAGCAAATAATCAAGATCATAAATTTTATTACCTCCTAAGTCATCACAAAGTCA  
>HPVFA75/KI88-03\_Unclassified\_206902429\_nt6441\_L1\_Tile|1  
GAGCAAATAATCAAGATCATAAATTTTATTACCTCCTAAGTCATCACAAAGTCAAACAC  
>HPVFA75/KI88-03\_Unclassified\_206902429\_nt6446\_L1\_Tile|1

AATAATCAAGATCATAAATTTTATTTACCTCCTAAGTCATCACAAAGTCAAACACTAGGA  
>HPVFA75/KI88-03\_Unclassified\_206902429\_nt6451\_L1\_Tile|1  
TCAAGATCATAAATTTTATTTACCTCCTAAGTCATCACAAAGTCAAACACTAGGAAATTC  
>HPVFA75/KI88-03\_Unclassified\_206902429\_nt6456\_L1\_Tile|1  
ATCATAAATTTTATTTACCTCCTAAGTCATCACAAAGTCAAACACTAGGAAATTCATTT  
>HPVFA75/KI88-03\_Unclassified\_206902429\_nt6461\_L1\_Tile|1  
AAATTTTATTTACCTCCTAAGTCATCACAAAGTCAAACACTAGGAAATTCATTTACTTT  
>HPVFA75/KI88-03\_Unclassified\_206902429\_nt6466\_L1\_Tile|1  
TTATTTACCTCCTAAGTCATCACAAAGTCAAACACTAGGAAATTCATTTACTTTCTCTAC  
>HPVFA75/KI88-03\_Unclassified\_206902429\_nt6471\_L1\_Tile|1  
TACCTCCTAAGTCATCACAAAGTCAAACACTAGGAAATTCATTTACTTTCTCTACTGTTA  
>HPVFA75/KI88-03\_Unclassified\_206902429\_nt6476\_L1\_Tile|1  
CCTAAGTCATCACAAAGTCAAACACTAGGAAATTCATTTACTTTCTCTACTGTTAGTGGT  
>HPVFA75/KI88-03\_Unclassified\_206902429\_nt6481\_L1\_Tile|1  
GTCATCACAAAGTCAAACACTAGGAAATTCATTTACTTTCTCTACTGTTAGTGGTCTCT  
>HPVFA75/KI88-03\_Unclassified\_206902429\_nt6491\_L1\_Tile|1  
AGTCAAACACTAGGAAATTCATTTACTTTCTCTACTGTTAGTGGTCTCTAGTCTCTTCA  
>HPVFA75/KI88-03\_Unclassified\_206902429\_nt6641\_L1\_Tile|1  
GTTGCTGATAACACTAGAAACACTAACTTTACCATTTGTGTACCTTCAGATAATGGTGCT  
>HPVFA75/KI88-03\_Unclassified\_206902429\_nt6646\_L1\_Tile|1  
TGATAACACTAGAAACACTAACTTTACCATTTGTGTACCTTCAGATAATGGTGCTATAAC  
>HPVFA75/KI88-03\_Unclassified\_206902429\_nt6656\_L1\_Tile|1  
AGAAACACTAACTTTACCATTTGTGTACCTTCAGATAATGGTGCTATAACTGAGTATGAT  
>HPVFA75/KI88-03\_Unclassified\_206902429\_nt6661\_L1\_Tile|1  
CACTAACTTTACCATTTGTGTACCTTCAGATAATGGTGCTATAACTGAGTATGATTCTAG  
>HPVFA75/KI88-03\_Unclassified\_206902429\_nt6666\_L1\_Tile|1  
ACTTTACCATTTGTGTACCTTCAGATAATGGTGCTATAACTGAGTATGATTCTAGCAAAT  
>HPVFA75/KI88-03\_Unclassified\_206902429\_nt6676\_L1\_Tile|1  
TTGTGTACCTTCAGATAATGGTGCTATAACTGAGTATGATTCTAGCAAATTTAGAGAATT  
>HPVFA75/KI88-03\_Unclassified\_206902429\_nt6681\_L1\_Tile|1  
TACCTTCAGATAATGGTGCTATAACTGAGTATGATTCTAGCAAATTTAGAGAATTTTTAA  
>HPVFA75/KI88-03\_Unclassified\_206902429\_nt6691\_L1\_Tile|1  
TAATGGTGCTATAACTGAGTATGATTCTAGCAAATTTAGAGAATTTTTAAGGCACGTGGA  
>HPVFA75/KI88-03\_Unclassified\_206902429\_nt6701\_L1\_Tile|1  
ATAACTGAGTATGATTCTAGCAAATTTAGAGAATTTTTAAGGCACGTGGAAGAGTATCAA  
>HPVFA75/KI88-03\_Unclassified\_206902429\_nt6706\_L1\_Tile|1  
TGAGTATGATTCTAGCAAATTTAGAGAATTTTTAAGGCACGTGGAAGAGTATCAAATATC  
>HPVFA75/KI88-03\_Unclassified\_206902429\_nt6711\_L1\_Tile|1  
ATGATTCTAGCAAATTTAGAGAATTTTTAAGGCACGTGGAAGAGTATCAAATATCTGTAA  
>HPVFA75/KI88-03\_Unclassified\_206902429\_nt6766\_L1\_Tile|1  
TGTAATATTACAACCTGTGTAAAGTATCACTGCAACCTGATGTGCTAGCCCAGATCAATGC  
>HPVFA75/KI88-03\_Unclassified\_206902429\_nt6771\_L1\_Tile|1  
TATTACAACCTGTGTAAAGTATCACTGCAACCTGATGTGCTAGCCCAGATCAATGCAATGA  
>HPVFA75/KI88-03\_Unclassified\_206902429\_nt6786\_L1\_Tile|1  
AAGTATCACTGCAACCTGATGTGCTAGCCCAGATCAATGCAATGAATTCAGGTATATTAG  
>HPVFA75/KI88-03\_Unclassified\_206902429\_nt6861\_L1\_Tile|1  
GATTTGTACCAACTCCTGACAATGCAGTACATGACACCTATAGATTTATAAATTCCTCAG  
>HPVFA75/KI88-03\_Unclassified\_206902429\_nt6871\_L1\_Tile|1  
AACTCCTGACAATGCAGTACATGACACCTATAGATTTATAAATTCCTCAGCCACTAAATG  
>HPVFA75/KI88-03\_Unclassified\_206902429\_nt6891\_L1\_Tile|1  
ATGACACCTATAGATTTATAAATTCCTCAGCCACTAAATGTCCAGATAAGGTTCTCTGCAA  
>HPVFA75/KI88-03\_Unclassified\_206902429\_nt6896\_L1\_Tile|1  
ACCTATAGATTTATAAATTCCTCAGCCACTAAATGTCCAGATAAGGTTCTCTGCAAAAGAT  
>HPVFA75/KI88-03\_Unclassified\_206902429\_nt6901\_L1\_Tile|1  
TAGATTTATAAATTCCTCAGCCACTAAATGTCCAGATAAGGTTCTCTGCAAAAGATAGAGA



>HPVFA75/KI88-03\_Unclassified\_206902429\_nt6906\_L1\_Tile|1  
TTATAAATTCCTCAGCCACTAAATGTCCAGATAAGGTTCTTGCAAAAGATAGAGAGGATC  
>HPVFA75/KI88-03\_Unclassified\_206902429\_nt6911\_L1\_Tile|1  
AATTCCTCAGCCACTAAATGTCCAGATAAGGTTCTTGCAAAAGATAGAGAGGATCCATTT  
>HPVFA75/KI88-03\_Unclassified\_206902429\_nt6926\_L1\_Tile|1  
AAATGTCCAGATAAGGTTCTTGCAAAAGATAGAGAGGATCCATTTGCTCAATATTTCTTT  
>HPVFA75/KI88-03\_Unclassified\_206902429\_nt7021\_L1\_Tile|1  
TTTAGATCAATATCCTTTAGGAAGAAAGTTTTTGTTCGAAGCAGGATTACAGAACACCAG  
>HPVFA75/KI88-03\_Unclassified\_206902429\_nt7026\_L1\_Tile|1  
ATCAATATCCTTTAGGAAGAAAGTTTTTGTTCGAAGCAGGATTACAGAACACCAGGGTCA  
>HPVFA75/KI88-03\_Unclassified\_206902429\_nt7031\_L1\_Tile|1  
TATCCTTTAGGAAGAAAGTTTTTGTTCGAAGCAGGATTACAGAACACCAGGGTCAAATCA  
>HPVFA75/KI88-03\_Unclassified\_206902429\_nt7036\_L1\_Tile|1  
TTTAGGAAGAAAGTTTTTGTTCGAAGCAGGATTACAGAACACCAGGGTCAAATCATTA  
>HPVFA75/KI88-03\_Unclassified\_206902429\_nt7041\_L1\_Tile|1  
GAAGAAAGTTTTTGTTCGAAGCAGGATTACAGAACACCAGGGTCAAATCATTAAGCGTA  
>HPVFA75/KI88-03\_Unclassified\_206902429\_nt7046\_L1\_Tile|1  
AAGTTTTTGTTCGAAGCAGGATTACAGAACACCAGGGTCAAATCATTAAGCGTAGCAGA  
>HPVFA75/KI88-03\_Unclassified\_206902429\_nt7051\_L1\_Tile|1  
TTTGTTCGAAGCAGGATTACAGAACACCAGGGTCAAATCATTAAGCGTAGCAGATCTGT  
>HPVFA75/KI88-03\_Unclassified\_206902429\_nt7071\_L1\_Tile|1  
AGAACACCAGGGTCAAATCATTAAGCGTAGCAGATCTGTTTCTCGGGGTACTGCAAAAC  
>HPVFA75/KI88-03\_Unclassified\_206902429\_nt7081\_L1\_Tile|1  
GGTCAAATCATTAAGCGTAGCAGATCTGTTTCTCGGGGTACTGCAAAACGACGACGGAC  
>HPVRTRX7\_Unclassified\_30315616\_nt6412\_L1\_Tile|1  
GTGTGGGAGAGCATTGGGAAAAGGCCTTACCTTGTGGAGATGCGCCTGCAGATAATGGTA  
>HPVRTRX7\_Unclassified\_30315616\_nt6427\_L1\_Tile|1  
GGGAAAAGGCCTTACCTTGTGGAGATGCGCCTGCAGATAATGGTATTTGCCCTCCAATTG  
>HPVRTRX7\_Unclassified\_30315616\_nt6447\_L1\_Tile|1  
GGAGATGCGCCTGCAGATAATGGTATTTGCCCTCCAATTGAATTAACAAAAACACTTTTATT  
>HPVRTRX7\_Unclassified\_30315616\_nt6532\_L1\_Tile|1  
GTTTTGGCAATATGAATTTCAAACTTTACAGCAGAATAGGGCTGATGTCAGTCTGGATA  
>HPVRTRX7\_Unclassified\_30315616\_nt6537\_L1\_Tile|1  
GGCAATATGAATTTCAAACTTTACAGCAGAATAGGGCTGATGTCAGTCTGGATATAGTT  
>HPVRTRX7\_Unclassified\_30315616\_nt6542\_L1\_Tile|2  
TATGAATTTCAAACTTTACAGCAGAATAGGGCTGATGTCAGTCTGGATATAGTTAATGA  
>HPVRTRX7\_Unclassified\_30315616\_nt6547\_L1\_Tile|1  
ATTTCAAACTTTACAGCAGAATAGGGCTGATGTCAGTCTGGATATAGTTAATGAACTT  
>HPVRTRX7\_Unclassified\_30315616\_nt6987\_L1\_Tile|1  
ATATCTATATCTAGTGAAAATCAAGATATACAGCAAATACAATCATATGACTCACAAAAG  
>HPVRTRX7\_Unclassified\_30315616\_nt6997\_L1\_Tile|1  
CTAGTGAAAATCAAGATATACAGCAAATACAATCATATGACTCACAAAAGTTTAGGGAAT  
>HPVRTRX7\_Unclassified\_30315616\_nt7002\_L1\_Tile|2  
GAAAATCAAGATATACAGCAAATACAATCATATGACTCACAAAAGTTTAGGGAATATTTA  
>HPVRTRX7\_Unclassified\_30315616\_nt7007\_L1\_Tile|1  
TCAAGATATACAGCAAATACAATCATATGACTCACAAAAGTTTAGGGAATATTTAAGGCA  
>HPVRTRX7\_Unclassified\_30315616\_nt7012\_L1\_Tile|1  
ATATACAGCAAATACAATCATATGACTCACAAAAGTTTAGGGAATATTTAAGGCACGTAG  
>HPVRTRX7\_Unclassified\_30315616\_nt7107\_L1\_Tile|1  
AAGATCCCACTACAAGCAGAAGTTTTAGCACAAATAAATGCAATGAACCCCTCCTTACTA  
>HPVRTRX7\_Unclassified\_30315616\_nt7182\_L1\_Tile|2  
GGATTTGTGCCAACTCCCGATAATCCTATCCAGGACACATACAGATTTATTGATTCCTTA  
>HPVRTRX7\_Unclassified\_30315616\_nt7197\_L1\_Tile|1  
CCCGATAATCCTATCCAGGACACATACAGATTTATTGATTCCTTAGCTACCAGGTGTCCC  
>HPVRTRX7\_Unclassified\_30315616\_nt7202\_L1\_Tile|2

TAATCCTATCCAGGACACATACAGATTTATTGATTCCTTAGCTACCAGGTGTCCCGATAA  
>HPVRTRX7\_Unclassified\_30315616\_nt7207\_L1\_Tile|1  
CTATCCAGGACACATACAGATTTATTGATTCCTTAGCTACCAGGTGTCCCGATAAAAATC  
>HPVRTRX7\_Unclassified\_30315616\_nt7212\_L1\_Tile|1  
CAGGACACATACAGATTTATTGATTCCTTAGCTACCAGGTGTCCCGATAAAAATCCACCA  
>HPVRTRX7\_Unclassified\_30315616\_nt7217\_L1\_Tile|1  
CACATACAGATTTATTGATTCCTTAGCTACCAGGTGTCCCGATAAAAATCCACCAAAGGA  
>HPVRTRX7\_Unclassified\_30315616\_nt7397\_L1\_Tile|1  
AACGACCGTTAACGGTACAAAGCCTTCAACGTATAGAAGTTCTGTACGGGGGATCAAAAG  
>HPV1\_Mu\_9626063\_nt5414\_L1\_Tile\_rc|1  
AGGAAGATAGAACTTATTCTGCGCTGGTAACCAGACAGCCATCTGAAAAACATTATACAT  
>HPV1\_Mu\_9626063\_nt5419\_L1\_Tile\_rc|1  
TGGGGAGGAAGATAGAACTTATTCTGCGCTGGTAACCAGACAGCCATCTGAAAAACATTA  
>HPV1\_Mu\_9626063\_nt5434\_L1\_Tile\_rc|1  
ATTCTAGTGATGGGCTGGGGAGGAAGATAGAACTTATTCTGCGCTGGTAACCAGACAGCC  
>HPV1\_Mu\_9626063\_nt5439\_L1\_Tile\_rc|1  
ACAGGATTCTAGTGATGGGCTGGGGAGGAAGATAGAACTTATTCTGCGCTGGTAACCAGA  
>HPV1\_Mu\_9626063\_nt5449\_L1\_Tile\_rc|1  
TCATCAGTGGACAGGATTCTAGTGATGGGCTGGGGAGGAAGATAGAACTTATTCTGCGCT  
>HPV1\_Mu\_9626063\_nt5454\_L1\_Tile\_rc|1  
CATATTCATCAGTGGACAGGATTCTAGTGATGGGCTGGGGAGGAAGATAGAACTTATTCT  
>HPV1\_Mu\_9626063\_nt5459\_L1\_Tile\_rc|1  
GGTTACATATTCATCAGTGGACAGGATTCTAGTGATGGGCTGGGGAGGAAGATAGAACTT  
>HPV1\_Mu\_9626063\_nt5474\_L1\_Tile\_rc|1  
GAAGAGATTGGTTCTGGTTACATATTCATCAGTGGACAGGATTCTAGTGATGGGCTGGGG  
>HPV1\_Mu\_9626063\_nt5479\_L1\_Tile\_rc|1  
TGGTAGAAGAGATTGGTTCTGGTTACATATTCATCAGTGGACAGGATTCTAGTGATGGGC  
>HPV1\_Mu\_9626063\_nt5484\_L1\_Tile\_rc|1  
TTGCATGGTAGAAGAGATTGGTTCTGGTTACATATTCATCAGTGGACAGGATTCTAGTGA  
>HPV1\_Mu\_9626063\_nt5489\_L1\_Tile\_rc|1  
AGATGTTGCATGGTAGAAGAGATTGGTTCTGGTTACATATTCATCAGTGGACAGGATTCT  
>HPV1\_Mu\_9626063\_nt5499\_L1\_Tile\_rc|1  
GTAGACGTTTCAGATGTTGCATGGTAGAAGAGATTGGTTCTGGTTACATATTCATCAGTGG  
>HPV1\_Mu\_9626063\_nt5504\_L1\_Tile\_rc|1  
CAGCAGTAGACGTTTCAGATGTTGCATGGTAGAAGAGATTGGTTCTGGTTACATATTCATC  
>HPV1\_Mu\_9626063\_nt5509\_L1\_Tile\_rc|1  
CCGACCAGCAGTAGACGTTTCAGATGTTGCATGGTAGAAGAGATTGGTTCTGGTTACATAT  
>HPV1\_Mu\_9626063\_nt5514\_L1\_Tile\_rc|1  
GATGTCCGACCAGCAGTAGACGTTTCAGATGTTGCATGGTAGAAGAGATTGGTTCTGGTTA  
>HPV1\_Mu\_9626063\_nt5529\_L1\_Tile\_rc|1  
AGATCTCAAACAAAGGATGTCCGACCAGCAGTAGACGTTTCAGATGTTGCATGGTAGAAGA  
>HPV1\_Mu\_9626063\_nt5534\_L1\_Tile\_rc|1  
ACTGGAGATCTCAAACAAAGGATGTCCGACCAGCAGTAGACGTTTCAGATGTTGCATGGTA  
>HPV1\_Mu\_9626063\_nt5539\_L1\_Tile\_rc|1  
TGATTACTGGAGATCTCAAACAAAGGATGTCCGACCAGCAGTAGACGTTTCAGATGTTGCA  
>HPV1\_Mu\_9626063\_nt5544\_L1\_Tile\_rc|1  
CAGTTTGATTACTGGAGATCTCAAACAAAGGATGTCCGACCAGCAGTAGACGTTTCAGATG  
>HPV1\_Mu\_9626063\_nt5549\_L1\_Tile\_rc|1  
AGTTACAGTTTGATTACTGGAGATCTCAAACAAAGGATGTCCGACCAGCAGTAGACGTTTC  
>HPV1\_Mu\_9626063\_nt5554\_L1\_Tile\_rc|1  
GGTATAGTTACAGTTTGATTACTGGAGATCTCAAACAAAGGATGTCCGACCAGCAGTAGA  
>HPV1\_Mu\_9626063\_nt5559\_L1\_Tile\_rc|1  
CTTTTGGTATAGTTACAGTTTGATTACTGGAGATCTCAAACAAAGGATGTCCGACCAGCA  
>HPV1\_Mu\_9626063\_nt5564\_L1\_Tile\_rc|1  
TGACACTTTTGGTATAGTTACAGTTTGATTACTGGAGATCTCAAACAAAGGATGTCCGAC

>HPV1\_Mu\_9626063\_nt5579\_L1\_Tile\_rc|1  
TCTAAATGCATTTGGTGACACTTTTGGTATAGTTACAGTTTGATTACTGGAGATCTCAAA  
>HPV1\_Mu\_9626063\_nt5584\_L1\_Tile\_rc|1  
AAAACTCTAAATGCATTTGGTGACACTTTTGGTATAGTTACAGTTTGATTACTGGAGATC  
>HPV1\_Mu\_9626063\_nt5594\_L1\_Tile\_rc|1  
ACGCACCCTAAAACTCTAAATGCATTTGGTGACACTTTTGGTATAGTTACAGTTTGATT  
>HPV1\_Mu\_9626063\_nt5599\_L1\_Tile\_rc|1  
GCAAAACGCACCCTAAAACTCTAAATGCATTTGGTGACACTTTTGGTATAGTTACAGTT  
>HPV1\_Mu\_9626063\_nt5604\_L1\_Tile\_rc|1  
GATCAGCAAAAACGCACCCTAAAACTCTAAATGCATTTGGTGACACTTTTGGTATAGTTA  
>HPV1\_Mu\_9626063\_nt5609\_L1\_Tile\_rc|1  
ATTTGGATCAGCAAAACGCACCCTAAAACTCTAAATGCATTTGGTGACACTTTTGGTAT  
>HPV1\_Mu\_9626063\_nt5614\_L1\_Tile\_rc|1  
AATCTATTTGGATCAGCAAAACGCACCCTAAAACTCTAAATGCATTTGGTGACACTTTT  
>HPV1\_Mu\_9626063\_nt5644\_L1\_Tile\_rc|1  
GGATTAAAAATTGCCTTATCCCCAAATGCAATCTATTTGGATCAGCAAAACGCACCCTA  
>HPV1\_Mu\_9626063\_nt5729\_L1\_Tile\_rc|1  
AGGGTGGCCCGTTATTCCCTATACCTAAAGGCTGGCCTCTACCTATCTCTATCCCTCTTAG  
>HPV1\_Mu\_9626063\_nt5734\_L1\_Tile\_rc|1  
AAAAGAGGGTGGCCCGTTATTCCCTATACCTAAAGGCTGGCCTCTACCTATCTCTATCCCT  
>HPV1\_Mu\_9626063\_nt5739\_L1\_Tile\_rc|1  
TATTTAAAAGAGGGTGGCCCGTTATTCCCTATACCTAAAGGCTGGCCTCTACCTATCTCTA  
>HPV1\_Mu\_9626063\_nt5744\_L1\_Tile\_rc|1  
TAACTTATTTAAAAGAGGGTGGCCCGTTATTCCCTATACCTAAAGGCTGGCCTCTACCTAT  
>HPV1\_Mu\_9626063\_nt5754\_L1\_Tile\_rc|1  
CTGCATCATCTAACTTATTTAAAAGAGGGTGGCCCGTTATTCCCTATACCTAAAGGCTGGC  
>HPV1\_Mu\_9626063\_nt5759\_L1\_Tile\_rc|1  
ATTTTCTGCATCATCTAACTTATTTAAAAGAGGGTGGCCCGTTATTCCCTATACCTAAAGG  
>HPV1\_Mu\_9626063\_nt5764\_L1\_Tile\_rc|1  
GTTGGATTTTCTGCATCATCTAACTTATTTAAAAGAGGGTGGCCCGTTATTCCCTATACCT  
>HPV1\_Mu\_9626063\_nt5769\_L1\_Tile\_rc|1  
AATTTGTTGGATTTTCTGCATCATCTAACTTATTTAAAAGAGGGTGGCCCGTTATTCCCTA  
>HPV1\_Mu\_9626063\_nt5774\_L1\_Tile\_rc|1  
AATATAATTTGTTGGATTTTCTGCATCATCTAACTTATTTAAAAGAGGGTGGCCCGTTAT  
>HPV1\_Mu\_9626063\_nt5784\_L1\_Tile\_rc|1  
CATGAGTATTAATATAATTTGTTGGATTTTCTGCATCATCTAACTTATTTAAAAGAGGGT  
>HPV1\_Mu\_9626063\_nt5789\_L1\_Tile\_rc|1  
ATTTGCATGAGTATTAATATAATTTGTTGGATTTTCTGCATCATCTAACTTATTTAAAAG  
>HPV1\_Mu\_9626063\_nt5794\_L1\_Tile\_rc|1  
TCTCCATTTGCATGAGTATTAATATAATTTGTTGGATTTTCTGCATCATCTAACTTATTT  
>HPV1\_Mu\_9626063\_nt5799\_L1\_Tile\_rc|1  
TAGAATCTCCATTTGCATGAGTATTAATATAATTTGTTGGATTTTCTGCATCATCTAACT  
>HPV1\_Mu\_9626063\_nt5809\_L1\_Tile\_rc|1  
GTATTTTGTCTAGAATCTCCATTTGCATGAGTATTAATATAATTTGTTGGATTTTCTGCA  
>HPV1\_Mu\_9626063\_nt5819\_L1\_Tile\_rc|1  
ATCAAAAGCAGTATTTTGTCTAGAATCTCCATTTGCATGAGTATTAATATAATTTGTTGG  
>HPV1\_Mu\_9626063\_nt5844\_L1\_Tile\_rc|1  
CGAGGAACATTTGTGTCTGTTTTGCATCAAAAGCAGTATTTTGTCTAGAATCTCCATTTG  
>HPV1\_Mu\_9626063\_nt5849\_L1\_Tile\_rc|1  
GCCGACGAGGAACATTTGTGTCTGTTTTGCATCAAAAGCAGTATTTTGTCTAGAATCTCC  
>HPV1\_Mu\_9626063\_nt5864\_L1\_Tile\_rc|1  
TGAAGCAGGAGTACAGCCGACGAGGAACATTTGTGTCTGTTTTGCATCAAAAGCAGTATT  
>HPV1\_Mu\_9626063\_nt5874\_L1\_Tile\_rc|1  
AGTGTTCACCTGAAGCAGGAGTACAGCCGACGAGGAACATTTGTGTCTGTTTTGCATCAA  
>HPV1\_Mu\_9626063\_nt5884\_L1\_Tile\_rc|1

CTACTTGTCCAGTGTTCACCTGAAGCAGGAGTACAGCCGACGAGGAACATTTGTGTCTGT  
>HPV1\_Mu\_9626063\_nt5889\_L1\_Tile\_rc|1  
AACGACTACTTGTCCAGTGTTCACCTGAAGCAGGAGTACAGCCGACGAGGAACATTTGTG  
>HPV1\_Mu\_9626063\_nt5894\_L1\_Tile\_rc|1  
TGGGCAACGACTACTTGTCCAGTGTTCACCTGAAGCAGGAGTACAGCCGACGAGGAACAT  
>HPV1\_Mu\_9626063\_nt5904\_L1\_Tile\_rc|1  
CTTGTTCCCCCTGGGCAACGACTACTTGTCCAGTGTTCACCTGAAGCAGGAGTACAGCCGA  
>HPV1\_Mu\_9626063\_nt5909\_L1\_Tile\_rc|1  
TTTCACTTGTTCCTTGGGCAACGACTACTTGTCCAGTGTTCACCTGAAGCAGGAGTACA  
>HPV1\_Mu\_9626063\_nt5914\_L1\_Tile\_rc|1  
CCAAGTTTCACTTGTTCCTTGGGCAACGACTACTTGTCCAGTGTTCACCTGAAGCAGGA  
>HPV1\_Mu\_9626063\_nt5929\_L1\_Tile\_rc|1  
ACCCTGGGGCAGTCCCCAAGTTTCACTTGTTCCTTGGGCAACGACTACTTGTCCAGTGT  
>HPV1\_Mu\_9626063\_nt5954\_L1\_Tile\_rc|1  
TTCTATGACAGACTCTATCATTTGCACCTTGGGGCAGTCCCCAAGTTTCACTTGTTCCTT  
>HPV1\_Mu\_9626063\_nt5964\_L1\_Tile\_rc|1  
TGTCACCATCTTCTATGACAGACTCTATCATTTGCACCTTGGGGCAGTCCCCAAGTTTCA  
>HPV1\_Mu\_9626063\_nt5974\_L1\_Tile\_rc|1  
ATATCCATCATGTACCATCTTCTATGACAGACTCTATCATTTGCACCTTGGGGCAGTCC  
>HPV1\_Mu\_9626063\_nt6044\_L1\_Tile\_rc|1  
TTGAACAACATCTAAAGGGACATCAGACTTGTCTTGCTGTAAAGCAGCAAAATCCATAGC  
>HPV1\_Mu\_9626063\_nt6049\_L1\_Tile\_rc|1  
GTTGCTTGAACAACATCTAAAGGGACATCAGACTTGTCTTGCTGTAAAGCAGCAAAATCC  
>HPV1\_Mu\_9626063\_nt6079\_L1\_Tile\_rc|1  
TTCATTCTGATATAATCAGGATATTTGCATGTTGCTTGAACAACATCTAAAGGGACATCA  
>HPV1\_Mu\_9626063\_nt6084\_L1\_Tile\_rc|1  
CATGGTTCATTCTGATATAATCAGGATATTTGCATGTTGCTTGAACAACATCTAAAGGGA  
>HPV1\_Mu\_9626063\_nt6089\_L1\_Tile\_rc|1  
GGCTTCATGGTTCATTCTGATATAATCAGGATATTTGCATGTTGCTTGAACAACATCTAA  
>HPV1\_Mu\_9626063\_nt6099\_L1\_Tile\_rc|1  
AGTTGCCATAGGCTTCATGGTTCATTCTGATATAATCAGGATATTTGCATGTTGCTTGAA  
>HPV1\_Mu\_9626063\_nt6104\_L1\_Tile\_rc|1  
CATAGAGTTGCCATAGGCTTCATGGTTCATTCTGATATAATCAGGATATTTGCATGTTGC  
>HPV1\_Mu\_9626063\_nt6114\_L1\_Tile\_rc|1  
CAAAAAAAAAACATAGAGTTGCCATAGGCTTCATGGTTCATTCTGATATAATCAGGATATT  
>HPV1\_Mu\_9626063\_nt6119\_L1\_Tile\_rc|1  
ACGTGCAAAAAAAAAACATAGAGTTGCCATAGGCTTCATGGTTCATTCTGATATAATCAGG  
>HPV1\_Mu\_9626063\_nt6129\_L1\_Tile\_rc|1  
TTTGCTCGCGACGTGCAAAAAAAAAACATAGAGTTGCCATAGGCTTCATGGTTCATTCTGA  
>HPV1\_Mu\_9626063\_nt6134\_L1\_Tile\_rc|1  
ATACATTTGCTCGCGACGTGCAAAAAAAAAACATAGAGTTGCCATAGGCTTCATGGTTCAT  
>HPV1\_Mu\_9626063\_nt6139\_L1\_Tile\_rc|1  
CTGGTATACATTTGCTCGCGACGTGCAAAAAAAAAACATAGAGTTGCCATAGGCTTCATGG  
>HPV1\_Mu\_9626063\_nt6184\_L1\_Tile\_rc|1  
ACTGCCTCCTTATCACCCACCGAACCCCCGCGAGTAAAAAAGTGCCTGGTATACATTTGC  
>HPV1\_Mu\_9626063\_nt6194\_L1\_Tile\_rc|1  
GCTTTGTGGGACTGCCTCCTTATCACCCACCGAACCCCCGCGAGTAAAAAAGTGCCTGGT  
>HPV1\_Mu\_9626063\_nt6199\_L1\_Tile\_rc|1  
TACAGGCTTTGTGGGACTGCCTCCTTATCACCCACCGAACCCCCGCGAGTAAAAAAGTGC  
>HPV1\_Mu\_9626063\_nt6209\_L1\_Tile\_rc|1  
TGCTGTTAAATACAGGCTTTGTGGGACTGCCTCCTTATCACCCACCGAACCCCCGCGAGT  
>HPV1\_Mu\_9626063\_nt6224\_L1\_Tile\_rc|1  
TCTTGGTTCAGCATCTGCTGTTAAATACAGGCTTTGTGGGACTGCCTCCTTATCACCCAC  
>HPV1\_Mu\_9626063\_nt6229\_L1\_Tile\_rc|1  
GTTGTTCTTGGTTCAGCATCTGCTGTTAAATACAGGCTTTGTGGGACTGCCTCCTTATCA

>HPV1\_Mu\_9626063\_nt6239\_L1\_Tile\_rc|1  
TGTTGCTAAAGTTGTTCTTGGTTCAGCATCTGCTGTAAATACAGGCTTGTGGGACTGC  
>HPV1\_Mu\_9626063\_nt6244\_L1\_Tile\_rc|1  
TTTGTGTGTTGCTAAAGTTGTTCTTGGTTCAGCATCTGCTGTAAATACAGGCTTGTGGG  
>HPV1\_Mu\_9626063\_nt6249\_L1\_Tile\_rc|1  
CATAATTTGTTGTTGCTAAAGTTGTTCTTGGTTCAGCATCTGCTGTAAATACAGGCTTT  
>HPV1\_Mu\_9626063\_nt6254\_L1\_Tile\_rc|1  
GCCTACATAATTTGTTGTTGCTAAAGTTGTTCTTGGTTCAGCATCTGCTGTAAATACAG  
>HPV1\_Mu\_9626063\_nt6264\_L1\_Tile\_rc|1  
CACTTGGTGTGCCTACATAATTTGTTGTTGCTAAAGTTGTTCTTGGTTCAGCATCTGCTG  
>HPV1\_Mu\_9626063\_nt6269\_L1\_Tile\_rc|1  
AGAGCCACTTGGTGTGCCTACATAATTTGTTGTTGCTAAAGTTGTTCTTGGTTCAGCATC  
>HPV1\_Mu\_9626063\_nt6279\_L1\_Tile\_rc|1  
ATGAAACCATAGAGCCACTTGGTGTGCCTACATAATTTGTTGTTGCTAAAGTTGTTCTTG  
>HPV1\_Mu\_9626063\_nt6359\_L1\_Tile\_rc|1  
CTGGTTTCTCCAGCAAATGCCATTATTCTGGCCTTGACATCGCTGAAGCCAGTAAGATCT  
>HPV1\_Mu\_9626063\_nt6369\_L1\_Tile\_rc|1  
TAATAAAATACTGGTTTCTCCAGCAAATGCCATTATTCTGGCCTTGACATCGCTGAAGCC  
>HPV1\_Mu\_9626063\_nt6379\_L1\_Tile\_rc|1  
TCTCCAACCTGTAATAAAATACTGGTTTCTCCAGCAAATGCCATTATTCTGGCCTTGACAT  
>HPV1\_Mu\_9626063\_nt6384\_L1\_Tile\_rc|1  
TATTATCTCCAACCTGTAATAAAATACTGGTTTCTCCAGCAAATGCCATTATTCTGGCCTT  
>HPV1\_Mu\_9626063\_nt6394\_L1\_Tile\_rc|1  
GTTCTCTGGTATTATCTCCAACCTGTAATAAAATACTGGTTTCTCCAGCAAATGCCATTA  
>HPV1\_Mu\_9626063\_nt6409\_L1\_Tile\_rc|1  
CTGATAGATAAACTTGTTCCTCTGGTATTATCTCCAACCTGTAATAAAATACTGGTTTCTC  
>HPV1\_Mu\_9626063\_nt6414\_L1\_Tile\_rc|1  
TCATACTGATAGATAAACTTGTTCCTCTGGTATTATCTCCAACCTGTAATAAAATACTGGT  
>HPV1\_Mu\_9626063\_nt6419\_L1\_Tile\_rc|1  
GTTTTTTCATACTGATAGATAAACTTGTTCCTCTGGTATTATCTCCAACCTGTAATAAATA  
>HPV1\_Mu\_9626063\_nt6424\_L1\_Tile\_rc|1  
GCATTGTTTTTCATACTGATAGATAAACTTGTTCCTCTGGTATTATCTCCAACCTGTAATA  
>HPV1\_Mu\_9626063\_nt6429\_L1\_Tile\_rc|1  
TACTTGCACTGTTTTTTCATACTGATAGATAAACTTGTTCCTCTGGTATTATCTCCAACCTG  
>HPV1\_Mu\_9626063\_nt6434\_L1\_Tile\_rc|1  
TGTAGTACTTGCATTGTTTTTTCATACTGATAGATAAACTTGTTCCTCTGGTATTATCTCC  
>HPV1\_Mu\_9626063\_nt6439\_L1\_Tile\_rc|1  
GAATATGTAGTACTTGCATTGTTTTTTCATACTGATAGATAAACTTGTTCCTCTGGTATTA  
>HPV1\_Mu\_9626063\_nt6444\_L1\_Tile\_rc|1  
CATTGGAATATGTAGTACTTGCATTGTTTTTTCATACTGATAGATAAACTTGTTCCTCTGG  
>HPV1\_Mu\_9626063\_nt6449\_L1\_Tile\_rc|1  
ATTAGCATTGGAATATGTAGTACTTGCATTGTTTTTTCATACTGATAGATAAACTTGTTC  
>HPV1\_Mu\_9626063\_nt6454\_L1\_Tile\_rc|1  
TTAAAATTAGCATTGGAATATGTAGTACTTGCATTGTTTTTTCATACTGATAGATAAACTT  
>HPV1\_Mu\_9626063\_nt6459\_L1\_Tile\_rc|1  
AATCATTAATAATTAGCATTGGAATATGTAGTACTTGCATTGTTTTTTCATACTGATAGATA  
>HPV1\_Mu\_9626063\_nt6464\_L1\_Tile\_rc|1  
TAGAAAATCATTAATAATTAGCATTGGAATATGTAGTACTTGCATTGTTTTTTCATACTGAT  
>HPV1\_Mu\_9626063\_nt6469\_L1\_Tile\_rc|1  
TGTCTTAGAAAATCATTAATAATTAGCATTGGAATATGTAGTACTTGCATTGTTTTTCATA  
>HPV1\_Mu\_9626063\_nt6474\_L1\_Tile\_rc|1  
CAGTATGTCTTAGAAAATCATTAATAATTAGCATTGGAATATGTAGTACTTGCATTGTTTT  
>HPV1\_Mu\_9626063\_nt6479\_L1\_Tile\_rc|1  
TTCTTCAGTATGTCTTAGAAAATCATTAATAATTAGCATTGGAATATGTAGTACTTGCATT  
>HPV1\_Mu\_9626063\_nt6484\_L1\_Tile\_rc|1

TCAAATTCTTCAGTATGTCTTAGAAAAATCATTAAAATTAGCATTGGAATATGTAGTACTT  
>HPV1\_Mu\_9626063\_nt6489\_L1\_Tile\_rc|1  
AAAGATCAAATTCTTCAGTATGTCTTAGAAAAATCATTAAAATTAGCATTGGAATATGTAG  
>HPV1\_Mu\_9626063\_nt6494\_L1\_Tile\_rc|1  
AAAAGAAAGATCAAATTCTTCAGTATGTCTTAGAAAAATCATTAAAATTAGCATTGGAATA  
>HPV1\_Mu\_9626063\_nt6499\_L1\_Tile\_rc|1  
ACTATAAAAAGAAAGATCAAATTCTTCAGTATGTCTTAGAAAAATCATTAAAATTAGCATTG  
>HPV1\_Mu\_9626063\_nt6504\_L1\_Tile\_rc|1  
GCTGAACTATAAAAAGAAAGATCAAATTCTTCAGTATGTCTTAGAAAAATCATTAAAATTAG  
>HPV1\_Mu\_9626063\_nt6509\_L1\_Tile\_rc|1  
ACAAAGCTGAACTATAAAAAGAAAGATCAAATTCTTCAGTATGTCTTAGAAAAATCATTAAA  
>HPV1\_Mu\_9626063\_nt6519\_L1\_Tile\_rc|1  
ACTTTACTTTTACAAAGCTGAACTATAAAAAGAAAGATCAAATTCTTCAGTATGTCTTAGAA  
>HPV1\_Mu\_9626063\_nt6524\_L1\_Tile\_rc|1  
AGTTAACTTTACTTTTACAAAGCTGAACTATAAAAAGAAAGATCAAATTCTTCAGTATGTCT  
>HPV1\_Mu\_9626063\_nt6529\_L1\_Tile\_rc|1  
TCGGGAGTTAACTTTACTTTTACAAAGCTGAACTATAAAAAGAAAGATCAAATTCTTCAGTA  
>HPV1\_Mu\_9626063\_nt6539\_L1\_Tile\_rc|1  
GGCTAGATTTTCGGGAGTTAACTTTACTTTTACAAAGCTGAACTATAAAAAGAAAGATCAAA  
>HPV1\_Mu\_9626063\_nt6544\_L1\_Tile\_rc|1  
ATGTAGGCTAGATTTTCGGGAGTTAACTTTACTTTTACAAAGCTGAACTATAAAAAGAAAGA  
>HPV1\_Mu\_9626063\_nt6549\_L1\_Tile\_rc|1  
TATGAATGTAGGCTAGATTTTCGGGAGTTAACTTTACTTTTACAAAGCTGAACTATAAAAAG  
>HPV1\_Mu\_9626063\_nt6554\_L1\_Tile\_rc|1  
CATTGTATGAATGTAGGCTAGATTTTCGGGAGTTAACTTTACTTTTACAAAGCTGAACTAT  
>HPV1\_Mu\_9626063\_nt6559\_L1\_Tile\_rc|1  
GGGTCCATTGTATGAATGTAGGCTAGATTTTCGGGAGTTAACTTTACTTTTACAAAGCTGA  
>HPV1\_Mu\_9626063\_nt6564\_L1\_Tile\_rc|1  
TATTAGGGTCCATTGTATGAATGTAGGCTAGATTTTCGGGAGTTAACTTTACTTTTACAAA  
>HPV1\_Mu\_9626063\_nt6569\_L1\_Tile\_rc|1  
TAAAATATTAGGGTCCATTGTATGAATGTAGGCTAGATTTTCGGGAGTTAACTTTACTTT  
>HPV1\_Mu\_9626063\_nt6574\_L1\_Tile\_rc|1  
TCCTCTAAAATATTAGGGTCCATTGTATGAATGTAGGCTAGATTTTCGGGAGTTAACTTT  
>HPV1\_Mu\_9626063\_nt6579\_L1\_Tile\_rc|1  
GCCAATCCTCTAAAATATTAGGGTCCATTGTATGAATGTAGGCTAGATTTTCGGGAGTTA  
>HPV1\_Mu\_9626063\_nt6594\_L1\_Tile\_rc|1  
GAGATACAGATAGTTGCCAATCCTCTAAAATATTAGGGTCCATTGTATGAATGTAGGCTA  
>HPV1\_Mu\_9626063\_nt6629\_L1\_Tile\_rc|1  
CCTATATTGATCTTCTAGAGGATTGGTAGGTGGTTGAGATACAGATAGTTGCCAATCCTC  
>HPV1\_Mu\_9626063\_nt6639\_L1\_Tile\_rc|1  
ACCCTAAAAACCTATATTGATCTTCTAGAGGATTGGTAGGTGGTTGAGATACAGATAGTT  
>HPV1\_Mu\_9626063\_nt6644\_L1\_Tile\_rc|1  
GGAAGACCCTAAAAACCTATATTGATCTTCTAGAGGATTGGTAGGTGGTTGAGATACAGA  
>HPV1\_Mu\_9626063\_nt6649\_L1\_Tile\_rc|1  
GCCAAGGAAGACCCTAAAAACCTATATTGATCTTCTAGAGGATTGGTAGGTGGTTGAGAT  
>HPV1\_Mu\_9626063\_nt6654\_L1\_Tile\_rc|1  
TTGCTGCCAAGGAAGACCCTAAAAACCTATATTGATCTTCTAGAGGATTGGTAGGTGGTT  
>HPV1\_Mu\_9626063\_nt6659\_L1\_Tile\_rc|1  
ACATTTTGCTGCCAAGGAAGACCCTAAAAACCTATATTGATCTTCTAGAGGATTGGTAGG  
>HPV1\_Mu\_9626063\_nt6664\_L1\_Tile\_rc|1  
TCTGGACATTTTGCTGCCAAGGAAGACCCTAAAAACCTATATTGATCTTCTAGAGGATTG  
>HPV1\_Mu\_9626063\_nt6669\_L1\_Tile\_rc|1  
CCTGTTCTGGACATTTTGCTGCCAAGGAAGACCCTAAAAACCTATATTGATCTTCTAGAG  
>HPV1\_Mu\_9626063\_nt6694\_L1\_Tile\_rc|1  
GGATCAGTCTGGGGCTCAGGAGGCGCTGTTCTGGACATTTTGCTGCCAAGGAAGACCCT

>HPV1\_Mu\_9626063\_nt6709\_L1\_Tile\_rc|1  
TTATATTGACTATAAGGATCAGTCTGGGGCTCAGGAGGCGCCTGTTCTGGACATTTTGCT  
>HPV1\_Mu\_9626063\_nt6719\_L1\_Tile\_rc|1  
TTCCCAGAATTTATATTGACTATAAGGATCAGTCTGGGGCTCAGGAGGCGCCTGTTCTGG  
>HPV1\_Mu\_9626063\_nt6729\_L1\_Tile\_rc|1  
TGAGATCGACTTCCCAGAATTTATATTGACTATAAGGATCAGTCTGGGGCTCAGGAGGCG  
>HPV1\_Mu\_9626063\_nt6734\_L1\_Tile\_rc|1  
TTCTGTGAGATCGACTTCCCAGAATTTATATTGACTATAAGGATCAGTCTGGGGCTCAGG  
>HPV1\_Mu\_9626063\_nt6744\_L1\_Tile\_rc|1  
CGGACATCCTTTCTGTGAGATCGACTTCCCAGAATTTATATTGACTATAAGGATCAGTCT  
>HPV1\_Mu\_9626063\_nt6749\_L1\_Tile\_rc|1  
TTGTTTCGGACATCCTTTCTGTGAGATCGACTTCCCAGAATTTATATTGACTATAAGGATC  
>HPV1\_Mu\_9626063\_nt6754\_L1\_Tile\_rc|1  
TCTAATTGTTTCGGACATCCTTTCTGTGAGATCGACTTCCCAGAATTTATATTGACTATAA  
>HPV1\_Mu\_9626063\_nt6759\_L1\_Tile\_rc|1  
ATTGGTCTAATTGTTTCGGACATCCTTTCTGTGAGATCGACTTCCCAGAATTTATATTGAC  
>HPV1\_Mu\_9626063\_nt6764\_L1\_Tile\_rc|1  
TGGAAATTGGTCTAATTGTTTCGGACATCCTTTCTGTGAGATCGACTTCCCAGAATTTATA  
>HPV1\_Mu\_9626063\_nt6769\_L1\_Tile\_rc|1  
CCTAGTGGAAATTGGTCTAATTGTTTCGGACATCCTTTCTGTGAGATCGACTTCCCAGAAT  
>HPV1\_Mu\_9626063\_nt6774\_L1\_Tile\_rc|1  
TCCTTCCTAGTGGAAATTGGTCTAATTGTTTCGGACATCCTTTCTGTGAGATCGACTTCCC  
>HPV1\_Mu\_9626063\_nt6779\_L1\_Tile\_rc|1  
AAATTTTCCTTCCTAGTGGAAATTGGTCTAATTGTTTCGGACATCCTTTCTGTGAGATCGAC  
>HPV1\_Mu\_9626063\_nt6784\_L1\_Tile\_rc|1  
TATAGAAATTTTCCTTCCTAGTGGAAATTGGTCTAATTGTTTCGGACATCCTTTCTGTGAGA  
>HPV1\_Mu\_9626063\_nt6789\_L1\_Tile\_rc|1  
TTTGATATAGAAATTTTCCTTCCTAGTGGAAATTGGTCTAATTGTTTCGGACATCCTTTCTG  
>HPV1\_Mu\_9626063\_nt6794\_L1\_Tile\_rc|1  
GCCACTTTGATATAGAAATTTTCCTTCCTAGTGGAAATTGGTCTAATTGTTTCGGACATCCT  
>HPV1\_Mu\_9626063\_nt6799\_L1\_Tile\_rc|1  
GTCATGCCACTTTGATATAGAAATTTTCCTTCCTAGTGGAAATTGGTCTAATTGTTTCGGAC  
>HPV1\_Mu\_9626063\_nt6804\_L1\_Tile\_rc|1  
GTTGTGTCATGCCACTTTGATATAGAAATTTTCCTTCCTAGTGGAAATTGGTCTAATTGTT  
>HPV1\_Mu\_9626063\_nt6809\_L1\_Tile\_rc|1  
AGTACGTTGTGTCATGCCACTTTGATATAGAAATTTTCCTTCCTAGTGGAAATTGGTCTAA  
>HPV1\_Mu\_9626063\_nt6814\_L1\_Tile\_rc|1  
GTAGCAGTACGTTGTGTCATGCCACTTTGATATAGAAATTTTCCTTCCTAGTGGAAATTGG  
>HPV1\_Mu\_9626063\_nt6819\_L1\_Tile\_rc|1  
AACTAGTAGCAGTACGTTGTGTCATGCCACTTTGATATAGAAATTTTCCTTCCTAGTGGAA  
>HPV1\_Mu\_9626063\_nt6824\_L1\_Tile\_rc|1  
GGTGGAACTAGTAGCAGTACGTTGTGTCATGCCACTTTGATATAGAAATTTTCCTTCCTAG  
>HPV1\_Mu\_9626063\_nt6834\_L1\_Tile\_rc|1  
TGCGCTTTGTGGTGGAACTAGTAGCAGTACGTTGTGTCATGCCACTTTGATATAGAAATT  
>HPV1\_Mu\_9626063\_nt6839\_L1\_Tile\_rc|1  
TGTTTTGCGCTTTGTGGTGGAACTAGTAGCAGTACGTTGTGTCATGCCACTTTGATATAG  
>HPV1\_Mu\_9626063\_nt6844\_L1\_Tile\_rc|1  
CGCACTGTTTTGCGCTTTGTGGTGGAACTAGTAGCAGTACGTTGTGTCATGCCACTTTGA  
>HPV1\_Mu\_9626063\_nt6849\_L1\_Tile\_rc|1  
ATACACGCACTGTTTTGCGCTTTGTGGTGGAACTAGTAGCAGTACGTTGTGTCATGCCAC  
>HPV1\_Mu\_9626063\_nt6854\_L1\_Tile\_rc|1  
CGTAGATACACGCACTGTTTTGCGCTTTGTGGTGGAACTAGTAGCAGTACGTTGTGTCAT  
>HPV1\_Mu\_9626063\_nt6859\_L1\_Tile\_rc|1  
GCTGACGTAGATACACGCACTGTTTTGCGCTTTGTGGTGGAACTAGTAGCAGTACGTTGT  
>HPV1\_Mu\_9626063\_nt6864\_L1\_Tile\_rc|1

GCTTGGCTGACGTAGATACACGCACTGTTTTGCGCTTTGTGGTGGAACTAGTAGCAGTAC  
>HPV1\_Mu\_9626063\_nt6879\_L1\_Tile\_rc|1  
AAGCCTTACGCCTGCGCTTGGCTGACGTAGATACACGCACTGTTTTGCGCTTTGTGGTGG  
>HPV1\_Mu\_9626063\_nt6881\_L1\_Tile\_rc|1  
CTAAGCCTTACGCCTGCGCTTGGCTGACGTAGATACACGCACTGTTTTGCGCTTTGTGGT  
>HPV2\_Alpha\_9626032\_nt5908\_L1\_Tile\_rc|1  
CACCTTATTATTACTCTTCTTTATAGAGTAATATGGATGACCCACAGTGAGAAGCCTAGA  
>HPV2\_Alpha\_9626032\_nt5913\_L1\_Tile\_rc|1  
ACAGCCACCTTATTATTACTCTTCTTTATAGAGTAATATGGATGACCCACAGTGAGAAGC  
>HPV2\_Alpha\_9626032\_nt6793\_L1\_Tile\_rc|1  
AAAATTGGTAGCCTTATAATTAGTATCAGACGCCTCAGTGGCACACAGAGATACATTAGT  
>HPV2\_Alpha\_9626032\_nt7193\_L1\_Tile\_rc|1  
TACTAGTGGGCGGCGTGGTCCCCGAAACAGCGGCGCGCTTGCGAGACACGGTAGGCATAG  
>HPV2\_Alpha\_9626032\_nt7198\_L1\_Tile\_rc|1  
TCGTTTACTAGTGGGCGGCGTGGTCCCCGAAACAGCGGCGCGCTTGCGAGACACGGTAGG  
>HPV3\_Alpha\_397005\_nt5878\_L1\_Tile\_rc|1  
AATATCCATCTTGGAATTAGAAGATTTGGGGATAGCAAAATAAGGATGACCCACGGTCAG  
>HPV3\_Alpha\_397005\_nt5883\_L1\_Tile\_rc|1  
TTAGGAATATCCATCTTGGAATTAGAAGATTTGGGGATAGCAAAATAAGGATGACCCACG  
>HPV3\_Alpha\_397005\_nt5903\_L1\_Tile\_rc|1  
TATATTGAAAGGCGGACACCTTAGGAATATCCATCTTGGAATTAGAAGATTTGGGGATAG  
>HPV3\_Alpha\_397005\_nt5908\_L1\_Tile\_rc|1  
CACTCTATATTGAAAGGCGGACACCTTAGGAATATCCATCTTGGAATTAGAAGATTTGGG  
>HPV3\_Alpha\_397005\_nt6273\_L1\_Tile\_rc|1  
ATAGGTGCAGTAATAAGCTCTAGAGGAGGACAATCACCCGGTGACGCATTCTGCTTACAT  
>HPV3\_Alpha\_397005\_nt6278\_L1\_Tile\_rc|1  
CTTGTATAGGTGCAGTAATAAGCTCTAGAGGAGGACAATCACCCGGTGACGCATTCTGCT  
>HPV3\_Alpha\_397005\_nt6518\_L1\_Tile\_rc|1  
TGTACAACGCGTCAGGCACGGTGTCTCCAGCCATACCAGCTCTGTTAAGAAAATGTCTTG  
>HPV3\_Alpha\_397005\_nt6523\_L1\_Tile\_rc|1  
TTTAATGTACAACGCGTCAGGCACGGTGTCTCCAGCCATACCAGCTCTGTTAAGAAAATG  
>HPV3\_Alpha\_397005\_nt6528\_L1\_Tile\_rc|1  
TCACCTTTAATGTACAACGCGTCAGGCACGGTGTCTCCAGCCATACCAGCTCTGTTAAGA  
>HPV3\_Alpha\_397005\_nt6533\_L1\_Tile\_rc|1  
GACTGTACCTTTAATGTACAACGCGTCAGGCACGGTGTCTCCAGCCATACCAGCTCTGT  
>HPV3\_Alpha\_397005\_nt6538\_L1\_Tile\_rc|1  
GCTCTGACTGTCACCTTTAATGTACAACGCGTCAGGCACGGTGTCTCCAGCCATACCAGC  
>HPV3\_Alpha\_397005\_nt6543\_L1\_Tile\_rc|1  
CCGCCGCTCTGACTGTCACCTTTAATGTACAACGCGTCAGGCACGGTGTCTCCAGCCATA  
>HPV3\_Alpha\_397005\_nt6553\_L1\_Tile\_rc|1  
TTTATCCCGACCGCGCTCTGACTGTCACCTTTAATGTACAACGCGTCAGGCACGGTGTCT  
>HPV3\_Alpha\_397005\_nt6563\_L1\_Tile\_rc|1  
CACTACCAATTTTATCCCGACCGCGCTCTGACTGTCACCTTTAATGTACAACGCGTCAG  
>HPV3\_Alpha\_397005\_nt6783\_L1\_Tile\_rc|1  
TACTCTTTAAATTTAGTAGCATCATATGTAGCCGAGGTTTCAGTAGAAACACACAATGTC  
>HPV3\_Alpha\_397005\_nt6788\_L1\_Tile\_rc|1  
TTAAATACTCTTTAAATTTAGTAGCATCATATGTAGCCGAGGTTTCAGTAGAAACACACA  
>HPV3\_Alpha\_397005\_nt6793\_L1\_Tile\_rc|1  
GTGTCTTAAATACTCTTTAAATTTAGTAGCATCATATGTAGCCGAGGTTTCAGTAGAAAC  
>HPV3\_Alpha\_397005\_nt7003\_L1\_Tile\_rc|1  
CTCAGTGGGAGGTGCATCTTTCTGGCAGGTAATGGCAGAGGAAGTTAAAAATCTATAGGT  
>HPV3\_Alpha\_397005\_nt7028\_L1\_Tile\_rc|1  
TTAGTTTGGCGTAGGGGTCTTGCTTCTCAGTGGGAGGTGCATCTTTCTGGCAGGTAATGG  
>HPV3\_Alpha\_397005\_nt7103\_L1\_Tile\_rc|1  
TGAGAAATTTCTTGCCAAGGGGGAAGTGCAGAAAGATCCAGGGAAAAACGATCCTTAAGAT



>HPV3\_Alpha\_397005\_nt7118\_L1\_Tile\_rc|1  
CTACACCGAGCTGCATGAGAAATTTCTGCGCAAGGGGGAAGTGCAGAAAGATCCAGGGAAA  
>HPV3\_Alpha\_397005\_nt7123\_L1\_Tile\_rc|1  
GGTACCTACACCGAGCTGCATGAGAAATTTCTGCGCAAGGGGGAAGTGCAGAAAGATCCAG  
>HPV3\_Alpha\_397005\_nt7138\_L1\_Tile\_rc|1  
AGATATACTAGAGCGGGTACCTACACCGAGCTGCATGAGAAATTTCTGCGCAAGGGGGA  
>HPV3\_Alpha\_397005\_nt7153\_L1\_Tile\_rc|1  
CGAGCGTTTACGAACAGATATACTAGAGCGGGTACCTACACCGAGCTGCATGAGAAATTT  
>HPV3\_Alpha\_397005\_nt7173\_L1\_Tile\_rc|1  
GTTCTAGATGTGGTTGTGCGCGAGCGTTTACGAACAGATATACTAGAGCGGGTACCTACA  
>HPV3\_Alpha\_397005\_nt7178\_L1\_Tile\_rc|1  
CAGCTGTTCTAGATGTGGTTGTGCGCGAGCGTTTACGAACAGATATACTAGAGCGGGTAC  
>HPV4\_Gamma\_9626597\_nt5516\_L1\_Tile\_rc|1  
AATCTAAACACTCTAAATTGACTTCCTGAAACCTTAGGAACTAATACTTTGTGAGGTTCC  
>HPV4\_Gamma\_9626597\_nt5541\_L1\_Tile\_rc|1  
AAATCTGTTGGGTCTGGCAAATTGAATCTAAACACTCTAAATTGACTTCCTGAAACCTT  
>HPV4\_Gamma\_9626597\_nt5556\_L1\_Tile\_rc|1  
ATTATCAATTAAAGCAAATCTGTTTGGGTCTGGCAAATTGAATCTAAACACTCTAAATTG  
>HPV4\_Gamma\_9626597\_nt5621\_L1\_Tile\_rc|1  
CCTCTTCCTATTTCTATTCCCCTCAGTTTCCATACTAGGCGTTCATGATCAGAATCATAA  
>HPV4\_Gamma\_9626597\_nt5631\_L1\_Tile\_rc|1  
AAGCGGTCCCTCCTCTTCTATTCTATTCCCCTCAGTTTCCATACTAGGCGTTCATGATC  
>HPV4\_Gamma\_9626597\_nt5636\_L1\_Tile\_rc|1  
ATACCAAGCGGTCCCTCCTCTTCTATTCTATTCCCCTCAGTTTCCATACTAGGCGTTCA  
>HPV4\_Gamma\_9626597\_nt5646\_L1\_Tile\_rc|1  
TGTAGTACCTATACCAAGCGGTCCCTCCTCTTCTATTCTATTCCCCTCAGTTTCCATAC  
>HPV4\_Gamma\_9626597\_nt5671\_L1\_Tile\_rc|1  
CAAACCTATTATATAAAGGATGACCTGTAGTACCTATACCAAGCGGTCCCTCCTCTTCCTA  
>HPV4\_Gamma\_9626597\_nt6071\_L1\_Tile\_rc|1  
AAGAAATGTCTGGCATATAGTTGTTCTCTTCTTCCAAAGAAAAACAAGCTATCTCCATAG  
>HPV4\_Gamma\_9626597\_nt6076\_L1\_Tile\_rc|1  
TGACAAAGAAATGTCTGGCATATAGTTGTTCTCTTCTTCCAAAGAAAAACAAGCTATCTC  
>HPV4\_Gamma\_9626597\_nt6086\_L1\_Tile\_rc|1  
GTGCGTCTCTGACAAAGAAATGTCTGGCATATAGTTGTTCTCTTCTTCCAAAGAAAAAC  
>HPV4\_Gamma\_9626597\_nt6151\_L1\_Tile\_rc|1  
GGTTTTGAGCACCAATAAAATAATCTGAGGTAGCTTCAAAGGTTCTGGTAGAGCATCTC  
>HPV4\_Gamma\_9626597\_nt6156\_L1\_Tile\_rc|1  
TTGTTGGTTTTGAGCACCAATAAAATAATCTGAGGTAGCTTCAAAGGTTCTGGTAGAGC  
>HPV4\_Gamma\_9626597\_nt6161\_L1\_Tile\_rc|1  
TGATCTTGTTGGTTTTGAGCACCAATAAAATAATCTGAGGTAGCTTCAAAGGTTCTGGT  
>HPV4\_Gamma\_9626597\_nt6166\_L1\_Tile\_rc|1  
TGTAATGATCTTGTTGGTTTTGAGCACCAATAAAATAATCTGAGGTAGCTTCAAAGGTT  
>HPV4\_Gamma\_9626597\_nt6171\_L1\_Tile\_rc|1  
TAAAGTGTACTGATCTTGTTGGTTTTGAGCACCAATAAAATAATCTGAGGTAGCTTCAA  
>HPV4\_Gamma\_9626597\_nt6176\_L1\_Tile\_rc|1  
GGTCCTAAAGTGTACTGATCTTGTTGGTTTTGAGCACCAATAAAATAATCTGAGGTAGCT  
>HPV4\_Gamma\_9626597\_nt6181\_L1\_Tile\_rc|1  
TATGAGGTCCCTAAAGTGTACTGATCTTGTTGGTTTTGAGCACCAATAAAATAATCTGAGG  
>HPV4\_Gamma\_9626597\_nt6186\_L1\_Tile\_rc|1  
ATAAATATGAGGTCCTAAAGTGTACTGATCTTGTTGGTTTTGAGCACCAATAAAATAATC  
>HPV4\_Gamma\_9626597\_nt6191\_L1\_Tile\_rc|1  
CCTACATAAAATATGAGGTCCTAAAGTGTACTGATCTTGTTGGTTTTGAGCACCAATAAAA  
>HPV4\_Gamma\_9626597\_nt6196\_L1\_Tile\_rc|1  
GGGTCCCTACATAAAATATGAGGTCCTAAAGTGTACTGATCTTGTTGGTTTTGAGCACCAA  
>HPV4\_Gamma\_9626597\_nt6206\_L1\_Tile\_rc|1

GAGCCACTAGGGGTCCCTACATAAATATGAGGTCCTAAAGTGACTGATCTTGTTGGTTT  
>HPV4\_Gamma\_9626597\_nt6211\_L1\_Tile\_rc|1  
CTAAAGAGCCACTAGGGGTCCCTACATAAATATGAGGTCCTAAAGTGACTGATCTTGTT  
>HPV4\_Gamma\_9626597\_nt6216\_L1\_Tile\_rc|1  
GGATACTAAAGAGCCACTAGGGGTCCCTACATAAATATGAGGTCCTAAAGTGACTGATC  
>HPV4\_Gamma\_9626597\_nt6221\_L1\_Tile\_rc|1  
TCACTGGATACTAAAGAGCCACTAGGGGTCCCTACATAAATATGAGGTCCTAAAGTGACT  
>HPV4\_Gamma\_9626597\_nt6226\_L1\_Tile\_rc|1  
GGGATTCACTGGATACTAAAGAGCCACTAGGGGTCCCTACATAAATATGAGGTCCTAAAG  
>HPV4\_Gamma\_9626597\_nt6356\_L1\_Tile\_rc|1  
GACTTCACAGAAATTGTAAAGTTTGTATTATGAGTGTTATCTACAAGAGTAACAAACAAC  
>HPV4\_Gamma\_9626597\_nt6361\_L1\_Tile\_rc|1  
CATCTGACTTCACAGAAATTGTAAAGTTTGTATTATGAGTGTTATCTACAAGAGTAACAA  
>HPV4\_Gamma\_9626597\_nt6366\_L1\_Tile\_rc|1  
AGCACCATCTGACTTCACAGAAATTGTAAAGTTTGTATTATGAGTGTTATCTACAAGAGT  
>HPV4\_Gamma\_9626597\_nt6371\_L1\_Tile\_rc|1  
TCATTAGCACCATCTGACTTCACAGAAATTGTAAAGTTTGTATTATGAGTGTTATCTACA  
>HPV4\_Gamma\_9626597\_nt6376\_L1\_Tile\_rc|1  
AATTGTCATTAGCACCATCTGACTTCACAGAAATTGTAAAGTTTGTATTATGAGTGTTAT  
>HPV4\_Gamma\_9626597\_nt6381\_L1\_Tile\_rc|1  
CTGATAATTGTCATTAGCACCATCTGACTTCACAGAAATTGTAAAGTTTGTATTATGAGT  
>HPV4\_Gamma\_9626597\_nt6386\_L1\_Tile\_rc|1  
TTATACTGATAATTGTCATTAGCACCATCTGACTTCACAGAAATTGTAAAGTTTGTATTA  
>HPV4\_Gamma\_9626597\_nt6391\_L1\_Tile\_rc|1  
TAGCTTTATACTGATAATTGTCATTAGCACCATCTGACTTCACAGAAATTGTAAAGTTTG  
>HPV4\_Gamma\_9626597\_nt6396\_L1\_Tile\_rc|1  
ATCACTAGCTTTATACTGATAATTGTCATTAGCACCATCTGACTTCACAGAAATTGTAAA  
>HPV4\_Gamma\_9626597\_nt6401\_L1\_Tile\_rc|1  
TTAAAATCACTAGCTTTATACTGATAATTGTCATTAGCACCATCTGACTTCACAGAAATT  
>HPV4\_Gamma\_9626597\_nt6406\_L1\_Tile\_rc|1  
ACTGTTTAAAATCACTAGCTTTATACTGATAATTGTCATTAGCACCATCTGACTTCACAG  
>HPV4\_Gamma\_9626597\_nt6411\_L1\_Tile\_rc|1  
GAGGTACTGTTTAAAATCACTAGCTTTATACTGATAATTGTCATTAGCACCATCTGACTT  
>HPV4\_Gamma\_9626597\_nt6416\_L1\_Tile\_rc|1  
TGTCTGAGGTACTGTTTAAAATCACTAGCTTTATACTGATAATTGTCATTAGCACCATCT  
>HPV4\_Gamma\_9626597\_nt6626\_L1\_Tile\_rc|1  
TCAGTTGCAGGGGTCTGTGTAGGGCATCTTGTAGCTCTAGATTGCAAAAATCTATATTGA  
>HPV4\_Gamma\_9626597\_nt6631\_L1\_Tile\_rc|1  
CTTTTTTCAGTTGCAGGGGTCTGTGTAGGGCATCTTGTAGCTCTAGATTGCAAAAATCTAT  
>HPV4\_Gamma\_9626597\_nt6636\_L1\_Tile\_rc|1  
ATCTTCTTTTTTCAGTTGCAGGGGTCTGTGTAGGGCATCTTGTAGCTCTAGATTGCAAAA  
>HPV4\_Gamma\_9626597\_nt6641\_L1\_Tile\_rc|1  
TATGGATCTTCTTTTTTCAGTTGCAGGGGTCTGTGTAGGGCATCTTGTAGCTCTAGATTGC  
>HPV4\_Gamma\_9626597\_nt6646\_L1\_Tile\_rc|1  
CTTTATATGGATCTTCTTTTTTCAGTTGCAGGGGTCTGTGTAGGGCATCTTGTAGCTCTAG  
>HPV4\_Gamma\_9626597\_nt6651\_L1\_Tile\_rc|1  
CAAATCTTTATATGGATCTTCTTTTTTCAGTTGCAGGGGTCTGTGTAGGGCATCTTGTAGC  
>HPV4\_Gamma\_9626597\_nt6656\_L1\_Tile\_rc|1  
AAAGACAAATCTTTATATGGATCTTCTTTTTTCAGTTGCAGGGGTCTGTGTAGGGCATCTT  
>HPV4\_Gamma\_9626597\_nt6771\_L1\_Tile\_rc|1  
TATTCTTTTACGTTTTAGAGAACCATTAATTAAACCACTTTGATATAAAAACCGCTGCC  
>HPV4\_Gamma\_9626597\_nt6776\_L1\_Tile\_rc|1  
CTTATTATTCTTTTACGTTTTAGAGAACCATTAATTAAACCACTTTGATATAAAAACCGC  
>HPV4\_Gamma\_9626597\_nt6781\_L1\_Tile\_rc|1  
AAGAACTTATTATTCTTTTACGTTTTAGAGAACCATTAATTAAACCACTTTGATATAAAA

>HPV4\_Gamma\_9626597\_nt6786\_L1\_Tile\_rc|1  
ATGAGAAGAACTTATTATTCTTTTACGTTTTAGAGAACCATTAATTAAACCACTTTGATA  
>HPV4\_Gamma\_9626597\_nt6791\_L1\_Tile\_rc|1  
TGTGCATGAGAAGAACTTATTATTCTTTTACGTTTTAGAGAACCATTAATTAAACCACTT  
>HPV4\_Gamma\_9626597\_nt6801\_L1\_Tile\_rc|1  
GGTATTAGTTTGTGCATGAGAAGAACTTATTATTCTTTTACGTTTTAGAGAACCATTAAT  
>HPV4\_Gamma\_9626597\_nt6811\_L1\_Tile\_rc|1  
CAGAACGTTTGGTATTAGTTTGTGCATGAGAAGAACTTATTATTCTTTTACGTTTTAGAG  
>HPV4\_Gamma\_9626597\_nt6816\_L1\_Tile\_rc|1  
TTTGGCAGAACGTTTGGTATTAGTTTGTGCATGAGAAGAACTTATTATTCTTTTACGTTT  
>HPV5\_Beta\_9627145\_nt6278\_L1\_Tile\_rc|1  
AGAAAATGTTATGTATGCATTACTGTTTTCTGTATCTTTTACTTTATTGAAATAAGGGTG  
>HPV5\_Beta\_9627145\_nt6283\_L1\_Tile\_rc|1  
TCTTTAGAAAATGTTATGTATGCATTACTGTTTTCTGTATCTTTTACTTTATTGAAATAA  
>HPV5\_Beta\_9627145\_nt6513\_L1\_Tile\_rc|1  
CTGATCTACTATCTTGAAGTGCCTTAAAATTCATGTTCCCAAACCTATGTCTGCCATAT  
>HPV5\_Beta\_9627145\_nt6518\_L1\_Tile\_rc|1  
GACATCTGATCTACTATCTTGAAGTGCCTTAAAATTCATGTTCCCAAACCTATGTCTGTC  
>HPV5\_Beta\_9627145\_nt6523\_L1\_Tile\_rc|1  
AAACTGACATCTGATCTACTATCTTGAAGTGCCTTAAAATTCATGTTCCCAAACCTATG  
>HPV5\_Beta\_9627145\_nt6533\_L1\_Tile\_rc|1  
GACGATGTCTAAACTGACATCTGATCTACTATCTTGAAGTGCCTTAAAATTCATGTTCCC  
>HPV5\_Beta\_9627145\_nt6538\_L1\_Tile\_rc|1  
TCATTGACGATGTCTAAACTGACATCTGATCTACTATCTTGAAGTGCCTTAAAATTCATG  
>HPV5\_Beta\_9627145\_nt6958\_L1\_Tile\_rc|1  
TCTTTTAGTGCTCCAGCCTGATTATATACAGAAATACTGAAATTAGTATTTCTTGTGTTG  
>HPV5\_Beta\_9627145\_nt6963\_L1\_Tile\_rc|1  
CAACATCTTTTAGTGCTCCAGCCTGATTATATACAGAAATACTGAAATTAGTATTTCTTG  
>HPV5\_Beta\_9627145\_nt6968\_L1\_Tile\_rc|1  
GTCTGCAACATCTTTTAGTGCTCCAGCCTGATTATATACAGAAATACTGAAATTAGTATT  
>HPV5\_Beta\_9627145\_nt6988\_L1\_Tile\_rc|1  
CTAAATTGATCTGCATTATAGTCTGCAACATCTTTTAGTGCTCCAGCCTGATTATATACA  
>HPV5\_Beta\_9627145\_nt6993\_L1\_Tile\_rc|1  
ATTCTCTAAATTGATCTGCATTATAGTCTGCAACATCTTTTAGTGCTCCAGCCTGATTAT  
>HPV5\_Beta\_9627145\_nt6998\_L1\_Tile\_rc|1  
TTGATATTCTCTAAATTGATCTGCATTATAGTCTGCAACATCTTTTAGTGCTCCAGCCTG  
>HPV5\_Beta\_9627145\_nt7003\_L1\_Tile\_rc|1  
TGTCTTTGATATTCTCTAAATTGATCTGCATTATAGTCTGCAACATCTTTTAGTGCTCCA  
>HPV5\_Beta\_9627145\_nt7008\_L1\_Tile\_rc|1  
CTACATGTCTTTGATATTCTCTAAATTGATCTGCATTATAGTCTGCAACATCTTTTAGTG  
>HPV5\_Beta\_9627145\_nt7068\_L1\_Tile\_rc|1  
ATACCTGTGCCTTTAAAGGAACCTTACAGAGTTGTAGAATTAAAGATATTTTCATATTCTT  
>HPV5\_Beta\_9627145\_nt7073\_L1\_Tile\_rc|1  
TGCCAATACCTGTGCCTTTAAAGGAACCTTACAGAGTTGTAGAATTAAAGATATTTTCATA  
>HPV5\_Beta\_9627145\_nt7078\_L1\_Tile\_rc|1  
ATCTGTGCCAATACCTGTGCCTTTAAAGGAACCTTACAGAGTTGTAGAATTAAAGATATT  
>HPV5\_Beta\_9627145\_nt7223\_L1\_Tile\_rc|1  
GTCTTCCTTTCTTTTCGGAGGATTCTTATCTGGACACCGTGTAGCCAAAGAGTCAATATA  
>HPV6\_Alpha\_6002612\_nt5926\_L1\_Tile\_rc|1  
ATATCCTGACACCTTTGGCACAACAGTTTGTGTAGCCCGTTTTATGGAAAAATAAGGATG  
>HPV6\_Alpha\_6002612\_nt6131\_L1\_Tile\_rc|1  
TACCACCACTCCCTGAATTTTCAACATCATCATATTTATTTAGGAAAGGATGTCCACTTA  
>HPV6\_Alpha\_6002612\_nt6141\_L1\_Tile\_rc|1  
TGTCCAGGGTTACCACCACTCCCTGAATTTTCAACATCATCATATTTATTTAGGAAAGGA  
>HPV6\_Alpha\_6002612\_nt6146\_L1\_Tile\_rc|1

TATCCTGTCCAGGGTTACCACCACTCCCTGAATTTTCAACATCATCATATTTATTTAGGA  
>HPV6\_Alpha\_6002612\_nt6151\_L1\_Tile\_rc|1  
CCTGTTATCCTGTCCAGGGTTACCACCACTCCCTGAATTTTCAACATCATCATATTTATT  
>HPV6\_Alpha\_6002612\_nt6266\_L1\_Tile\_rc|1  
CAGCCTGTACAGGTGTATTAGTACACTGTTTACCTTTACCCCAATGCTCGCCCAAAGGGG  
>HPV6\_Alpha\_6002612\_nt6561\_L1\_Tile\_rc|1  
CCACTACCTTAATTATAAGAGTATCAGGCACAGGTTCCCCACCTCGCCAGCCCTGTTA  
>HPV6\_Alpha\_6002612\_nt6566\_L1\_Tile\_rc|1  
GATTTCCACTACCCTTAATTATAAGAGTATCAGGCACAGGTTCCCCACCTCGCCAGCCC  
>HPV6\_Alpha\_6002612\_nt6571\_L1\_Tile\_rc|1  
CGTTCGATTTCCACTACCCTTAATTATAAGAGTATCAGGCACAGGTTCCCCACCTCGCC  
>HPV6\_Alpha\_6002612\_nt6591\_L1\_Tile\_rc|1  
TATATACTACTCCCTACAGACGTTTCGATTTCCACTACCCTTAATTATAAGAGTATCAGGC  
>HPV6\_Alpha\_6002612\_nt6596\_L1\_Tile\_rc|1  
TAACATATATACTACTCCCTACAGACGTTTCGATTTCCACTACCCTTAATTATAAGAGTAT  
>HPV6\_Alpha\_6002612\_nt6601\_L1\_Tile\_rc|1  
GGTGTAAACATATATACTACTCCCTACAGACGTTTCGATTTCCACTACCCTTAATTATAAG  
>HPV6\_Alpha\_6002612\_nt6611\_L1\_Tile\_rc|1  
AGCCGCTTGGGGTGTAAACATATATACTACTCCCTACAGACGTTTCGATTTCCACTACCCT  
>HPV6\_Alpha\_6002612\_nt6616\_L1\_Tile\_rc|1  
CAAAGAGCCGCTTGGGGTGTAAACATATATACTACTCCCTACAGACGTTTCGATTTCCACT  
>HPV6\_Alpha\_6002612\_nt6621\_L1\_Tile\_rc|1  
GACACCAAAGAGCCGCTTGGGGTGTAAACATATATACTACTCCCTACAGACGTTTCGATTT  
>HPV6\_Alpha\_6002612\_nt6791\_L1\_Tile\_rc|1  
CAGAATTGGTGTATGTGGAAGATGTAGTTACGGATGCACATAATGTCATGTTGGTACTGC  
>HPV6\_Alpha\_6002612\_nt6796\_L1\_Tile\_rc|1  
ATAATCAGAATTGGTGTATGTGGAAGATGTAGTTACGGATGCACATAATGTCATGTTGGT  
>HPV6\_Alpha\_6002612\_nt6801\_L1\_Tile\_rc|1  
TCTTTATAATCAGAATTGGTGTATGTGGAAGATGTAGTTACGGATGCACATAATGTCATG  
>HPV6\_Alpha\_6002612\_nt6806\_L1\_Tile\_rc|1  
TGTACTCTTTATAATCAGAATTGGTGTATGTGGAAGATGTAGTTACGGATGCACATAATG  
>HPV6\_Alpha\_6002612\_nt6811\_L1\_Tile\_rc|1  
ACGCATGTACTCTTTATAATCAGAATTGGTGTATGTGGAAGATGTAGTTACGGATGCACA  
>HPV6\_Alpha\_6002612\_nt6816\_L1\_Tile\_rc|1  
ACATGACGCATGTACTCTTTATAATCAGAATTGGTGTATGTGGAAGATGTAGTTACGGAT  
>HPV6\_Alpha\_6002612\_nt6821\_L1\_Tile\_rc|1  
CTTCCACATGACGCATGTACTCTTTATAATCAGAATTGGTGTATGTGGAAGATGTAGTTA  
>HPV6\_Alpha\_6002612\_nt6826\_L1\_Tile\_rc|1  
ATACTCTTCCACATGACGCATGTACTCTTTATAATCAGAATTGGTGTATGTGGAAGATGT  
>HPV6\_Alpha\_6002612\_nt7171\_L1\_Tile\_rc|1  
CTTAACACCGGTACGAATAGAGGACCGTCCCCATATCCACTTTGTAACAAAACTTGCG  
>HPV6\_Alpha\_6002612\_nt7191\_L1\_Tile\_rc|1  
GCTTTGGAAACAGCAGGGCGCTTAACACCGGTACGAATAGAGGACCGTCCCCATATATCCA  
>HPV7\_Alpha\_9627389\_nt5904\_L1\_Tile\_rc|1  
ATTAGGCTTTTTCAATTCAAATATGGATGTCCTATGGTTAATAACCTGGTACTACCTGC  
>HPV7\_Alpha\_9627389\_nt5909\_L1\_Tile\_rc|1  
TCGCCATTAGGCTTTTTCAATTCAAATATGGATGTCCTATGGTTAATAACCTGGTACTA  
>HPV7\_Alpha\_9627389\_nt5914\_L1\_Tile\_rc|1  
ATACATCGCCATTAGGCTTTTTCAATTCAAATATGGATGTCCTATGGTTAATAACCTGG  
>HPV7\_Alpha\_9627389\_nt5919\_L1\_Tile\_rc|1  
CACCGATACATCGCCATTAGGCTTTTTCAATTCAAATATGGATGTCCTATGGTTAATAA  
>HPV7\_Alpha\_9627389\_nt5924\_L1\_Tile\_rc|1  
TTAGGCACCGATACATCGCCATTAGGCTTTTTCAATTCAAATATGGATGTCCTATGGTT  
>HPV7\_Alpha\_9627389\_nt5929\_L1\_Tile\_rc|1  
ACACTTTAGGCACCGATACATCGCCATTAGGCTTTTTCAATTCAAATATGGATGTCCTA

>HPV7\_Alpha\_9627389\_nt5934\_L1\_Tile\_rc|1  
TCCAGACACTTTAGGCACCGATACATCGCCATTAGGCTTTTTCAATTCAAAATATGGATG  
>HPV7\_Alpha\_9627389\_nt5939\_L1\_Tile\_rc|1  
TGATGTCCAGACACTTTAGGCACCGATACATCGCCATTAGGCTTTTTCAATTCAAAATAT  
>HPV7\_Alpha\_9627389\_nt5944\_L1\_Tile\_rc|1  
TGTATTGATGTCCAGACACTTTAGGCACCGATACATCGCCATTAGGCTTTTTCAATTCAA  
>HPV7\_Alpha\_9627389\_nt6004\_L1\_Tile\_rc|1  
ATAAAGACGTGTCTGATAATCCAAATTTATTAGGGTCGGGCAAGCGTACTCTAAACACTC  
>HPV7\_Alpha\_9627389\_nt6014\_L1\_Tile\_rc|1  
TCAGAATTAAATAAAGACGTGTCTGATAATCCAAATTTATTAGGGTCGGGCAAGCGTACT  
>HPV7\_Alpha\_9627389\_nt6029\_L1\_Tile\_rc|1  
ACAAGGCGTTGGGTTTCAGAATTAAATAAAGACGTGTCTGATAATCCAAATTTATTAGGG  
>HPV7\_Alpha\_9627389\_nt6584\_L1\_Tile\_rc|1  
GCGCGATTAGATGAACCTGTTATATATAAAATCATTGGAACACTGTCTCCAGTAGTTCCT  
>HPV7\_Alpha\_9627389\_nt6589\_L1\_Tile\_rc|1  
TAGAAGCGCGATTAGATGAACCTGTTATATATAAAATCATTGGAACACTGTCTCCAGTAG  
>HPV7\_Alpha\_9627389\_nt6594\_L1\_Tile\_rc|1  
TGCAATAGAAGCGCGATTAGATGAACCTGTTATATATAAAATCATTGGAACACTGTCTCC  
>HPV7\_Alpha\_9627389\_nt6959\_L1\_Tile\_rc|1  
GGACCAATTTTAAATTCGAATCATCTAATAAGGAAGAATCCATAGCATGTATATATGTC  
>HPV7\_Alpha\_9627389\_nt6979\_L1\_Tile\_rc|1  
CCAAGGTTGCAGACGCTGGAGGACCAATTTTAAATTCGAATCATCTAATAAGGAAGAAT  
>HPV7\_Alpha\_9627389\_nt6984\_L1\_Tile\_rc|1  
ATCTTCCAAGGTTGCAGACGCTGGAGGACCAATTTTAAATTCGAATCATCTAATAAGGA  
>HPV7\_Alpha\_9627389\_nt7034\_L1\_Tile\_rc|1  
GGTGCATCACGCTGACATGCTATGGCTTTATTGGTAAGAAACCTATAAGTATCTTCCAAG  
>HPV7\_Alpha\_9627389\_nt7044\_L1\_Tile\_rc|1  
TTCTTTTGGGGTGCATCACGCTGACATGCTATGGCTTTATTGGTAAGAAACCTATAAGT  
>HPV8\_Beta\_333074\_nt6007\_L1\_Tile\_rc|1  
CTGTGTTGATTCCCGATACTTTGGGAACCTGTAATGTGTACCATTTATTGTTGTAAACA  
>HPV8\_Beta\_333074\_nt6012\_L1\_Tile\_rc|1  
AGACCCTGTGTTGATTTCCTGATACTTTGGGAACCTGTAATGTGTACCATTTATTGTTGT  
>HPV8\_Beta\_333074\_nt6027\_L1\_Tile\_rc|1  
GTAACCTTTAAGCGAAAGACCCTGTGTTGATTTCCTGATACTTTGGGAACCTGTAATGTGT  
>HPV8\_Beta\_333074\_nt6042\_L1\_Tile\_rc|2  
ACCTATTTGGATCTGGTAACCTTTAAGCGAAAGACCCTGTGTTGATTTCCTGATACTTTGG  
>HPV8\_Beta\_333074\_nt6197\_L1\_Tile\_rc|1  
TGAATTGCTGTTTTTCAGTGTCTTTTCACTTTATTAAATAGGGATGGCCGGTGCTCCCAAC  
>HPV8\_Beta\_333074\_nt6202\_L1\_Tile\_rc|2  
GTGTATGAATTGCTGTTTTTCAGTGTCTTTTCACTTTATTAAATAGGGATGGCCGGTGCTC  
>HPV8\_Beta\_333074\_nt6207\_L1\_Tile\_rc|1  
TTGTGGTGTATGAATTGCTGTTTTTCAGTGTCTTTTCACTTTATTAAATAGGGATGGCCGG  
>HPV8\_Beta\_333074\_nt6357\_L1\_Tile\_rc|1  
GTTCAATGGGTGGGCACAGACCTTGCTGTTGGTCCTCTGCACATGGAATGGCTTTTCCC  
>HPV8\_Beta\_333074\_nt6362\_L1\_Tile\_rc|2  
TTTTAGTTCAATGGGTGGGCACAGACCTTGCTGTTGGTCCTCTGCACATGGAATGGCTTT  
>HPV8\_Beta\_333074\_nt6367\_L1\_Tile\_rc|1  
GTATTTTTTAGTTCAATGGGTGGGCACAGACCTTGCTGTTGGTCCTCTGCACATGGAATG  
>HPV8\_Beta\_333074\_nt6372\_L1\_Tile\_rc|1  
TAAGTGTATTTTTAGTTCAATGGGTGGGCACAGACCTTGCTGTTGGTCCTCTGCACATG  
>HPV8\_Beta\_333074\_nt6377\_L1\_Tile\_rc|1  
TTCAATAACTGTATTTTTTAGTTCAATGGGTGGGCACAGACCTTGCTGTTGGTCCTCTGC  
>HPV8\_Beta\_333074\_nt6382\_L1\_Tile\_rc|2  
CCATCTTCAATAACTGTATTTTTTAGTTCAATGGGTGGGCACAGACCTTGCTGTTGGTCC  
>HPV8\_Beta\_333074\_nt6457\_L1\_Tile\_rc|1

TCGAGACTTACATCAGATCTGTTCTGTTGTAAAGTCTTAAAGTTCATATTACCAAACCA  
>HPV8\_Beta\_333074\_nt6462\_L1\_Tile\_rc|2  
CTATGTCGAGACTTACATCAGATCTGTTCTGTTGTAAAGTCTTAAAGTTCATATTACCAA  
>HPV8\_Beta\_333074\_nt6467\_L1\_Tile\_rc|1  
ATTTACTATGTCGAGACTTACATCAGATCTGTTCTGTTGTAAAGTCTTAAAGTTCATATT  
>HPV8\_Beta\_333074\_nt6472\_L1\_Tile\_rc|1  
ATCTCATTTACTATGTCGAGACTTACATCAGATCTGTTCTGTTGTAAAGTCTTAAAGTTC  
>HPV8\_Beta\_333074\_nt6477\_L1\_Tile\_rc|1  
TGCATATCTCATTTACTATGTCGAGACTTACATCAGATCTGTTCTGTTGTAAAGTCTTAA  
>HPV8\_Beta\_333074\_nt6482\_L1\_Tile\_rc|2  
ATATTTGCATATCTCATTTACTATGTCGAGACTTACATCAGATCTGTTCTGTTGTAAAGT  
>HPV8\_Beta\_333074\_nt6892\_L1\_Tile\_rc|1  
ATGTTCTTAAGTTCCTTCAAGTGTAAAGTGTAAAGTGTAAAGTGTAAAGTGTAAAGTGT  
>HPV8\_Beta\_333074\_nt6897\_L1\_Tile\_rc|1  
CTGTGATGTTCTTAAGTTCCTTCAAGTGTAAAGTGTAAAGTGTAAAGTGTAAAGTGT  
>HPV8\_Beta\_333074\_nt6902\_L1\_Tile\_rc|2  
ATAGTCTGTGATGTTCTTAAGTTCCTTCAAGTGTAAAGTGTAAAGTGTAAAGTGTAAAGT  
>HPV8\_Beta\_333074\_nt6907\_L1\_Tile\_rc|1  
GATTTATAGTCTGTGATGTTCTTAAGTTCCTTCAAGTGTAAAGTGTAAAGTGTAAAGTGT  
>HPV8\_Beta\_333074\_nt6912\_L1\_Tile\_rc|1  
GGGTTGATTTATAGTCTGTGATGTTCTTAAGTTCCTTCAAGTGTAAAGTGTAAAGTGT  
>HPV8\_Beta\_333074\_nt6917\_L1\_Tile\_rc|1  
GAACTGGGTTGATTTATAGTCTGTGATGTTCTTAAGTTCCTTCAAGTGTAAAGTGTAAAGT  
>HPV8\_Beta\_333074\_nt6922\_L1\_Tile\_rc|2  
TCTCTGAACTGGGTTGATTTATAGTCTGTGATGTTCTTAAGTTCCTTCAAGTGTAAAGT  
>HPV8\_Beta\_333074\_nt6927\_L1\_Tile\_rc|1  
GATATTCTCTGAACTGGGTTGATTTATAGTCTGTGATGTTCTTAAGTTCCTTCAAGTGTAAAGT  
>HPV8\_Beta\_333074\_nt6932\_L1\_Tile\_rc|1  
TCTCAGATATTCTCTGAACTGGGTTGATTTATAGTCTGTGATGTTCTTAAGTTCCTTCAAGT  
>HPV8\_Beta\_333074\_nt6937\_L1\_Tile\_rc|1  
ACATGTCTCAGATATTCTCTGAACTGGGTTGATTTATAGTCTGTGATGTTCTTAAGTTCCT  
>HPV8\_Beta\_333074\_nt6942\_L1\_Tile\_rc|2  
CTTCTACATGTCTCAGATATTCTCTGAACTGGGTTGATTTATAGTCTGTGATGTTCTTAAGT  
>HPV8\_Beta\_333074\_nt7002\_L1\_Tile\_rc|2  
CTAAAACATCAGCCTTTAGTGGTATCTTACACAATTGTAATATGAGGGAAATTTTCATATT  
>HPV8\_Beta\_333074\_nt7012\_L1\_Tile\_rc|1  
TTGATTTGTGCTAAAACATCAGCCTTTAGTGGTATCTTACACAATTGTAATATGAGGGAA  
>HPV8\_Beta\_333074\_nt7077\_L1\_Tile\_rc|1  
TTGGAGTATCAGGGGTAGGTACAAATCCCAGTTGCCATTCCCTCAAGTAGTGATGAATTCA  
>HPV8\_Beta\_333074\_nt7082\_L1\_Tile\_rc|2  
ATGAATTGGAGTATCAGGGGTAGGTACAAATCCCAGTTGCCATTCCCTCAAGTAGTGATGA  
>HPV8\_Beta\_333074\_nt7197\_L1\_Tile\_rc|1  
GTTCTGTAAGGTCCACATTCCAGAAGTTAAACTTTGCATATGGATCAGGCTTTTCCTTAG  
>HPV8\_Beta\_333074\_nt7202\_L1\_Tile\_rc|2  
AAGTCGTTCTGTAAGGTCCACATTCCAGAAGTTAAACTTTGCATATGGATCAGGCTTTTC  
>HPV8\_Beta\_333074\_nt7207\_L1\_Tile\_rc|1  
AGGGAAAGTCGTTCTGTAAGGTCCACATTCCAGAAGTTAAACTTTGCATATGGATCAGGC  
>HPV8\_Beta\_333074\_nt7217\_L1\_Tile\_rc|1  
ATCCAAATCCAGGGAAAGTCGTTCTGTAAGGTCCACATTCCAGAAGTTAAACTTTGCATA  
>HPV8\_Beta\_333074\_nt7222\_L1\_Tile\_rc|2  
TATTGATCCAAATCCAGGGAAAGTCGTTCTGTAAGGTCCACATTCCAGAAGTTAAACTTT  
>HPV9\_Beta\_9627396\_nt5861\_L1\_Tile\_rc|1  
GTCCGTCGCCTGAGCGGACATCATAATATGGATGACCCACTGTTAGCAAACGGTCACTAA  
>HPV9\_Beta\_9627396\_nt5866\_L1\_Tile\_rc|1  
CCTTTGTCCGTCGCCTGAGCGGACATCATAATATGGATGACCCACTGTTAGCAAACGGTC

>HPV9\_Beta\_9627396\_nt5871\_L1\_Tile\_rc|1  
TCAATCCTTTGTCCGTCGCCTGAGCGGACATCATAATATGGATGACCCACTGTTAGCAAA  
>HPV9\_Beta\_9627396\_nt5881\_L1\_Tile\_rc|1  
TTTAGGGACTTCAATCCTTTGTCCGTCGCCTGAGCGGACATCATAATATGGATGACCCAC  
>HPV9\_Beta\_9627396\_nt5901\_L1\_Tile\_rc|1  
CGATACTGATTACCAGACACTTTAGGGACTTCAATCCTTTGTCCGTCGCCTGAGCGGACA  
>HPV9\_Beta\_9627396\_nt6181\_L1\_Tile\_rc|1  
TAAGCATGGAATACATCCTATAATGAACATTTGTACCTGTTTGGGGTCAAAAGATGTGTT  
>HPV9\_Beta\_9627396\_nt6236\_L1\_Tile\_rc|1  
CTAGTTGATTATTAGCATCCTTTTCACACACTTTGGCTTTATCCCAGTGTTCTCCTAAGC  
>HPV9\_Beta\_9627396\_nt6241\_L1\_Tile\_rc|1  
TAAGCCTAGTTGATTATTAGCATCCTTTTCACACACTTTGGCTTTATCCCAGTGTTCTCC  
>HPV9\_Beta\_9627396\_nt6246\_L1\_Tile\_rc|1  
GGACATAAGCCTAGTTGATTATTAGCATCCTTTTCACACACTTTGGCTTTATCCCAGTGT  
>HPV9\_Beta\_9627396\_nt6251\_L1\_Tile\_rc|1  
TAGGAGGACATAAGCCTAGTTGATTATTAGCATCCTTTTCACACACTTTGGCTTTATCCC  
>HPV9\_Beta\_9627396\_nt6256\_L1\_Tile\_rc|1  
TTCTATAGGAGGACATAAGCCTAGTTGATTATTAGCATCCTTTTCACACACTTTGGCTTT  
>HPV9\_Beta\_9627396\_nt6261\_L1\_Tile\_rc|1  
CTTAATTCTATAGGAGGACATAAGCCTAGTTGATTATTAGCATCCTTTTCACACACTTTG  
>HPV9\_Beta\_9627396\_nt6266\_L1\_Tile\_rc|1  
TGTTTCTTAATTCTATAGGAGGACATAAGCCTAGTTGATTATTAGCATCCTTTTCACACA  
>HPV9\_Beta\_9627396\_nt6366\_L1\_Tile\_rc|1  
TCAACAATATCTAAGCTTACATCAGACTTATTAAAGGACAGTTCCTTATTGTTGATATTT  
>HPV9\_Beta\_9627396\_nt6371\_L1\_Tile\_rc|1  
TTTCATCAACAATATCTAAGCTTACATCAGACTTATTAAAGGACAGTTCCTTATTGTTGA  
>HPV9\_Beta\_9627396\_nt6521\_L1\_Tile\_rc|1  
GGTTTACTGCACCATCAGGAACAGCGTCACCAACTGAACCTCCTCTAACATAATAATGCC  
>HPV9\_Beta\_9627396\_nt6526\_L1\_Tile\_rc|1  
ATCCTGGTTTACTGCACCATCAGGAACAGCGTCACCAACTGAACCTCCTCTAACATAATA  
>HPV9\_Beta\_9627396\_nt6536\_L1\_Tile\_rc|1  
AGAAATTATGATCCTGGTTTACTGCACCATCAGGAACAGCGTCACCAACTGAACCTCCTC  
>HPV9\_Beta\_9627396\_nt6551\_L1\_Tile\_rc|1  
TTTTTGTCTGGCAAAAAGAAATTATGATCCTGGTTTACTGCACCATCAGGAACAGCGTCAC  
>HPV9\_Beta\_9627396\_nt6556\_L1\_Tile\_rc|1  
ATCACTTTTTGCTGGCAAAAAGAAATTATGATCCTGGTTTACTGCACCATCAGGAACAGC  
>HPV9\_Beta\_9627396\_nt6586\_L1\_Tile\_rc|1  
GGTGGAATTAGCTATTGTTTCGTTGTTGTTGATCACTTTTTGCTGGCAAAAAGAAATTATG  
>HPV9\_Beta\_9627396\_nt6596\_L1\_Tile\_rc|1  
TAGGATAGTAGGTGGAATTAGCTATTGTTTCGTTGTTGTTGATCACTTTTTGCTGGCAAAA  
>HPV9\_Beta\_9627396\_nt6601\_L1\_Tile\_rc|1  
TACTGTAGGATAGTAGGTGGAATTAGCTATTGTTTCGTTGTTGTTGATCACTTTTTGCTGG  
>HPV9\_Beta\_9627396\_nt6606\_L1\_Tile\_rc|1  
CCACTTACTGTAGGATAGTAGGTGGAATTAGCTATTGTTTCGTTGTTGTTGATCACTTTTT  
>HPV9\_Beta\_9627396\_nt6616\_L1\_Tile\_rc|1  
TACTAATGACCCACTTACTGTAGGATAGTAGGTGGAATTAGCTATTGTTTCGTTGTTGTTG  
>HPV9\_Beta\_9627396\_nt6621\_L1\_Tile\_rc|1  
GAAGTTACTAATGACCCACTTACTGTAGGATAGTAGGTGGAATTAGCTATTGTTTCGTTGT  
>HPV9\_Beta\_9627396\_nt6756\_L1\_Tile\_rc|1  
GACACACTAATGGTAAAATTGGTGTTACGTGTATTGTCTGCCACTGTAACAAATATCTGA  
>HPV9\_Beta\_9627396\_nt6766\_L1\_Tile\_rc|1  
TGCCTCTGTAGACACACTAATGGTAAAATTGGTGTTACGTGTATTGTCTGCCACTGTAAC  
>HPV9\_Beta\_9627396\_nt6776\_L1\_Tile\_rc|1  
CTGTTTGAGCTGCCTCTGTAGACACACTAATGGTAAAATTGGTGTTACGTGTATTGTCTG  
>HPV9\_Beta\_9627396\_nt6781\_L1\_Tile\_rc|1

TTCTTCTGTTTGAGCTGCCTCTGTAGACACACTAATGGTAAAATTGGTGTTACGTGTATT  
>HPV9\_Beta\_9627396\_nt6786\_L1\_Tile\_rc|1  
TTATATTCTTCTGTTTGAGCTGCCTCTGTAGACACACTAATGGTAAAATTGGTGTTACGT  
>HPV9\_Beta\_9627396\_nt6791\_L1\_Tile\_rc|1  
TGGCATTATATTCTTCTGTTTGAGCTGCCTCTGTAGACACACTAATGGTAAAATTGGTGT  
>HPV9\_Beta\_9627396\_nt6796\_L1\_Tile\_rc|1  
ATTATTGGCATTATATTCTTCTGTTTGAGCTGCCTCTGTAGACACACTAATGGTAAAATT  
>HPV9\_Beta\_9627396\_nt6801\_L1\_Tile\_rc|1  
CTAATATTATTGGCATTATATTCTTCTGTTTGAGCTGCCTCTGTAGACACACTAATGGTA  
>HPV9\_Beta\_9627396\_nt6806\_L1\_Tile\_rc|1  
ATTCTCTAATATTATTGGCATTATATTCTTCTGTTTGAGCTGCCTCTGTAGACACACTAA  
>HPV9\_Beta\_9627396\_nt6886\_L1\_Tile\_rc|1  
GGATAATACTTCAGCTACTAAAGGCACCTTACACAACCTGTAAGATTAATGAAATCTGATA  
>HPV9\_Beta\_9627396\_nt6891\_L1\_Tile\_rc|1  
ATCTGGGATAATACTTCAGCTACTAAAGGCACCTTACACAACCTGTAAGATTAATGAAATC  
>HPV9\_Beta\_9627396\_nt7026\_L1\_Tile\_rc|1  
TCTGTAGGCTCAACAGCATCTGGGCATTTTGTGGCTTTTGAATCAATATATCTGTAGATA  
>HPV9\_Beta\_9627396\_nt7096\_L1\_Tile\_rc|1  
AAGATCCAACGATAATCTTTCAGTTAGATCCACTTTCCAAATGAGTATTTGGCAAAGGG  
>HPV9\_Beta\_9627396\_nt7101\_L1\_Tile\_rc|1  
TGATCAAGATCCAACGATAATCTTTCAGTTAGATCCACTTTCCAAATGAGTATTTGGCA  
>HPV9\_Beta\_9627396\_nt7136\_L1\_Tile\_rc|1  
CAGCTTGAAAAAGAAATTTTCTACCTAAAGGATATTGATCAAGATCCAACGATAATCTTT  
>HPV9\_Beta\_9627396\_nt7166\_L1\_Tile\_rc|1  
TTTTAATAGGACGTTTTTCGTGTTTGCAAACCAGCTTGAAAAAGAAATTTTCTACCTAAAG  
>HPV9\_Beta\_9627396\_nt7171\_L1\_Tile\_rc|1  
AGATGTTTTAATAGGACGTTTTTCGTGTTTGCAAACCAGCTTGAAAAAGAAATTTTCTACC  
>HPV9\_Beta\_9627396\_nt7176\_L1\_Tile\_rc|1  
TTAACAGATGTTTTAATAGGACGTTTTTCGTGTTTGCAAACCAGCTTGAAAAAGAAATTTT  
>HPV9\_Beta\_9627396\_nt7181\_L1\_Tile\_rc|1  
ATGTTTTAACAGATGTTTTAATAGGACGTTTTTCGTGTTTGCAAACCAGCTTGAAAAAGAA  
>HPV9\_Beta\_9627396\_nt7186\_L1\_Tile\_rc|1  
TTTAGATGTTTTAACAGATGTTTTAATAGGACGTTTTTCGTGTTTGCAAACCAGCTTGAAA  
>HPV9\_Beta\_9627396\_nt7191\_L1\_Tile\_rc|1  
GCATTTTTAGATGTTTTAACAGATGTTTTAATAGGACGTTTTTCGTGTTTGCAAACCAGCT  
>HPV9\_Beta\_9627396\_nt7196\_L1\_Tile\_rc|1  
TCTTAGCATTTTTTAGATGTTTTAACAGATGTTTTAATAGGACGTTTTTCGTGTTTGCAAAC  
>HPV9\_Beta\_9627396\_nt7201\_L1\_Tile\_rc|1  
CCTTCTCTTAGCATTTTTTAGATGTTTTAACAGATGTTTTAATAGGACGTTTTTCGTGTTTG  
>HPV9\_Beta\_9627396\_nt7206\_L1\_Tile\_rc|1  
GTTTCGCTTCTCTTAGCATTTTTTAGATGTTTTAACAGATGTTTTAATAGGACGTTTTTCGT  
>HPV9\_Beta\_9627396\_nt7210\_L1\_Tile\_rc|1  
TTAGGTTCGCCCTTCTCTTAGCATTTTTTAGATGTTTTAACAGATGTTTTAATAGGACGTTT  
>HPV10\_Alpha\_9627257\_nt6590\_L1\_Tile\_rc|1  
ATATGAAAGTGCTGGGATGGCGTCTCCAACAGCACTAGCCCGATTAAAGAAATGTCTTG  
>HPV10\_Alpha\_9627257\_nt6595\_L1\_Tile\_rc|1  
CTTTAATATGAAAGTGCTGGGATGGCGTCTCCAACAGCACTAGCCCGATTAAAGAAATG  
>HPV10\_Alpha\_9627257\_nt6600\_L1\_Tile\_rc|1  
TTGCTCTTTAATATGAAAGTGCTGGGATGGCGTCTCCAACAGCACTAGCCCGATTAAAG  
>HPV10\_Alpha\_9627257\_nt6615\_L1\_Tile\_rc|1  
TCTCGCCCCCACC GTTGCTCTTTAATATGAAAGTGCTGGGATGGCGTCTCCAACAGCA  
>HPV10\_Alpha\_9627257\_nt6625\_L1\_Tile\_rc|1  
ACTACCAACGTCTCGCCCCCACC GTTGCTCTTTAATATGAAAGTGCTGGGATGGCGTC  
>HPV10\_Alpha\_9627257\_nt6815\_L1\_Tile\_rc|1  
GGGAGGCCTCAGAAGGAACACACAAGCACATATTGGTACTGCGAGTCGTGTCTACCACAG



>HPV10\_Alpha\_9627257\_nt6820\_L1\_Tile\_rc|1  
GGCAGGGGAGGCTCAGAAGGAACACACAAGCACATATTGGTACTGCGAGTCGTGTCTAC  
>HPV10\_Alpha\_9627257\_nt6825\_L1\_Tile\_rc|1  
GTAGTGGCAGGGGAGGCTCAGAAGGAACACACAAGCACATATTGGTACTGCGAGTCGTG  
>HPV10\_Alpha\_9627257\_nt6840\_L1\_Tile\_rc|1  
TTGGTGGCGTCATACGTAGTGGCAGGGGAGGCTCAGAAGGAACACACAAGCACATATTG  
>HPV101\_Unclassified\_109390389\_nt4918\_L1\_Tile\_rc|1  
GCAAATAAAATGTATCAAATGCATCAAACCATCCACAACAATAGGAGGTTTCAGACACAT  
>HPV101\_Unclassified\_109390389\_nt4923\_L1\_Tile\_rc|1  
TGGATGCAAATAAAATGTATCAAATGCATCAAAACCATCCACAACAATAGGAGGTTTCAG  
>HPV101\_Unclassified\_109390389\_nt4928\_L1\_Tile\_rc|1  
TGACTTGGATGCAAATAAAATGTATCAAATGCATCAAACCATCCACAACAATAGGAGGT  
>HPV101\_Unclassified\_109390389\_nt4933\_L1\_Tile\_rc|1  
GTCTGTGACTTGGATGCAAATAAAATGTATCAAATGCATCAAAACCATCCACAACAATAG  
>HPV101\_Unclassified\_109390389\_nt4938\_L1\_Tile\_rc|1  
TTTGCCTGTGTGACTTGGATGCAAATAAAATGTATCAAATGCATCAAAACCATCCACAAC  
>HPV101\_Unclassified\_109390389\_nt4963\_L1\_Tile\_rc|1  
AAAAACCAGACCGTTTGCCTTGCCTTGCCTTGCCTGTGTGACTTGGATGCAAATAAAATGTAT  
>HPV101\_Unclassified\_109390389\_nt4968\_L1\_Tile\_rc|1  
ACATTAAAAACCAGACCGTTTGCCTTGCCTTGCCTTGCCTGTGTGACTTGGATGCAAATAAAA  
>HPV101\_Unclassified\_109390389\_nt5008\_L1\_Tile\_rc|1  
TTTACCAGTCTGAGGTAGCCACAAACCAGCCATCTGCAAAACATTAAAAACCAGACCGTT  
>HPV101\_Unclassified\_109390389\_nt5013\_L1\_Tile\_rc|1  
TATATTTTACCAGTCTGAGGTAGCCACAAACCAGCCATCTGCAAAACATTAAAAACCAGA  
>HPV101\_Unclassified\_109390389\_nt5018\_L1\_Tile\_rc|1  
GTAGGTATATTTTACCAGTCTGAGGTAGCCACAAACCAGCCATCTGCAAAACATTAAAA  
>HPV101\_Unclassified\_109390389\_nt5043\_L1\_Tile\_rc|1  
CTCCTAGACACAGGAGGAGCTGGAGGTAGGTATATTTTACCAGTCTGAGGTAGCCACAAA  
>HPV101\_Unclassified\_109390389\_nt5048\_L1\_Tile\_rc|1  
TAAGACTCCTAGACACAGGAGGAGCTGGAGGTAGGTATATTTTACCAGTCTGAGGTAGCC  
>HPV101\_Unclassified\_109390389\_nt5053\_L1\_Tile\_rc|1  
GGTGGTAAGACTCCTAGACACAGGAGGAGCTGGAGGTAGGTATATTTTACCAGTCTGAGG  
>HPV101\_Unclassified\_109390389\_nt5058\_L1\_Tile\_rc|1  
TCATCGGTGGTAAGACTCCTAGACACAGGAGGAGCTGGAGGTAGGTATATTTTACCAGTC  
>HPV101\_Unclassified\_109390389\_nt5063\_L1\_Tile\_rc|1  
CATATTCATCGGTGGTAAGACTCCTAGACACAGGAGGAGCTGGAGGTAGGTATATTTTAC  
>HPV101\_Unclassified\_109390389\_nt5083\_L1\_Tile\_rc|1  
GAATACAGATGTTTCCACAACATATTCATCGGTGGTAAGACTCCTAGACACAGGAGGAGC  
>HPV101\_Unclassified\_109390389\_nt5088\_L1\_Tile\_rc|1  
TGGAAGAATACAGATGTTTCCACAACATATTCATCGGTGGTAAGACTCCTAGACACAGGA  
>HPV101\_Unclassified\_109390389\_nt5118\_L1\_Tile\_rc|1  
CCCACAGTTACTAGACGATCACTGGATGCATGGAAGAATACAGATGTTTCCACAACATAT  
>HPV101\_Unclassified\_109390389\_nt5128\_L1\_Tile\_rc|1  
ATAGGGGTGACCCACAGTTACTAGACGATCACTGGATGCATGGAAGAATACAGATGTTTC  
>HPV101\_Unclassified\_109390389\_nt5133\_L1\_Tile\_rc|1  
GGAAAATAGGGGTGACCCACAGTTACTAGACGATCACTGGATGCATGGAAGAATACAGAT  
>HPV101\_Unclassified\_109390389\_nt5138\_L1\_Tile\_rc|1  
TAACGGGAAAATAGGGGTGACCCACAGTTACTAGACGATCACTGGATGCATGGAAGAATA  
>HPV101\_Unclassified\_109390389\_nt5143\_L1\_Tile\_rc|1  
TTTTATAACGGGAAAATAGGGGTGACCCACAGTTACTAGACGATCACTGGATGCATGGAA  
>HPV101\_Unclassified\_109390389\_nt5148\_L1\_Tile\_rc|1  
CCTGGTTTTATAACGGGAAAATAGGGGTGACCCACAGTTACTAGACGATCACTGGATGCA  
>HPV101\_Unclassified\_109390389\_nt5153\_L1\_Tile\_rc|1  
GATTGCCTGGTTTTTATAACGGGAAAATAGGGGTGACCCACAGTTACTAGACGATCACTGG  
>HPV101\_Unclassified\_109390389\_nt5158\_L1\_Tile\_rc|1

GGTGTGATTGCCTGGTTTTATAACGGGAAAATAGGGGTGACCCACAGTTACTAGACGATC  
>HPV101\_Unclassified\_109390389\_nt5163\_L1\_Tile\_rc|1  
TCAACGGTGTGATTGCCTGGTTTTATAACGGGAAAATAGGGGTGACCCACAGTTACTAGA  
>HPV101\_Unclassified\_109390389\_nt5168\_L1\_Tile\_rc|1  
GAACCTCAACGGTGTGATTGCCTGGTTTTATAACGGGAAAATAGGGGTGACCCACAGTTA  
>HPV101\_Unclassified\_109390389\_nt5178\_L1\_Tile\_rc|1  
GAAACCTTAGGAACCTCAACGGTGTGATTGCCTGGTTTTATAACGGGAAAATAGGGGTGA  
>HPV101\_Unclassified\_109390389\_nt5183\_L1\_Tile\_rc|1  
TGCCAGAAACCTTAGGAACCTCAACGGTGTGATTGCCTGGTTTTATAACGGGAAAATAGG  
>HPV101\_Unclassified\_109390389\_nt5188\_L1\_Tile\_rc|1  
CTGGTTGCCAGAAACCTTAGGAACCTCAACGGTGTGATTGCCTGGTTTTATAACGGGAAA  
>HPV101\_Unclassified\_109390389\_nt5193\_L1\_Tile\_rc|1  
CTAAACTGGTTGCCAGAAACCTTAGGAACCTCAACGGTGTGATTGCCTGGTTTTATAACG  
>HPV101\_Unclassified\_109390389\_nt5198\_L1\_Tile\_rc|1  
AAGCCCTAAACTGGTTGCCAGAAACCTTAGGAACCTCAACGGTGTGATTGCCTGGTTTTA  
>HPV101\_Unclassified\_109390389\_nt5208\_L1\_Tile\_rc|1  
CGTAGGCGAAAAGCCCTAAACTGGTTGCCAGAAACCTTAGGAACCTCAACGGTGTGATTG  
>HPV101\_Unclassified\_109390389\_nt5223\_L1\_Tile\_rc|1  
TTGGGATCTGGGAGACGTAGGCGAAAAGCCCTAAACTGGTTGCCAGAAACCTTAGGAACC  
>HPV101\_Unclassified\_109390389\_nt5233\_L1\_Tile\_rc|1  
AGCAAACCTATTGGGATCTGGGAGACGTAGGCGAAAAGCCCTAAACTGGTTGCCAGAAAC  
>HPV101\_Unclassified\_109390389\_nt5238\_L1\_Tile\_rc|1  
ATTAAAGCAAACCTATTGGGATCTGGGAGACGTAGGCGAAAAGCCCTAAACTGGTTGCCA  
>HPV101\_Unclassified\_109390389\_nt5298\_L1\_Tile\_rc|1  
TCAATTCCCTCTAAGACGCCACACGAGGCGCTCCGATTCAACATTATACAATTGTTTGTCA  
>HPV101\_Unclassified\_109390389\_nt5303\_L1\_Tile\_rc|1  
CAATATCAATTCCCTCTAAGACGCCACACGAGGCGCTCCGATTCAACATTATACAATTGTT  
>HPV101\_Unclassified\_109390389\_nt5308\_L1\_Tile\_rc|1  
TCTGCCAATATCAATTCCCTCTAAGACGCCACACGAGGCGCTCCGATTCAACATTATACAA  
>HPV101\_Unclassified\_109390389\_nt5313\_L1\_Tile\_rc|1  
CCTCCTCTGCCAATATCAATTCCCTCTAAGACGCCACACGAGGCGCTCCGATTCAACATTA  
>HPV101\_Unclassified\_109390389\_nt5403\_L1\_Tile\_rc|1  
TTAGCACCACCCTTTTGATATCCATTAGGATTTTCAGTATCCTTTAACTTATTAAATAAA  
>HPV101\_Unclassified\_109390389\_nt5408\_L1\_Tile\_rc|1  
CGTCCTTAGCACCACCCTTTTGATATCCATTAGGATTTTCAGTATCCTTTAACTTATTAA  
>HPV101\_Unclassified\_109390389\_nt5413\_L1\_Tile\_rc|1  
TCTAGCGTCCCTTAGCACCACCCTTTTGATATCCATTAGGATTTTCAGTATCCTTTAACTT  
>HPV101\_Unclassified\_109390389\_nt5423\_L1\_Tile\_rc|1  
AAACATTTTGTCTAGCGTCCCTTAGCACCACCCTTTTGATATCCATTAGGATTTTCAGTAT  
>HPV101\_Unclassified\_109390389\_nt5428\_L1\_Tile\_rc|1  
CATAGAAACATTTTGTCTAGCGTCCCTTAGCACCACCCTTTTGATATCCATTAGGATTTTC  
>HPV101\_Unclassified\_109390389\_nt5433\_L1\_Tile\_rc|1  
GGATCCATAGAAACATTTTGTCTAGCGTCCCTTAGCACCACCCTTTTGATATCCATTAGGA  
>HPV101\_Unclassified\_109390389\_nt5438\_L1\_Tile\_rc|1  
GTTTAGGATCCATAGAAACATTTTGTCTAGCGTCCCTTAGCACCACCCTTTTGATATCCAT  
>HPV101\_Unclassified\_109390389\_nt5543\_L1\_Tile\_rc|1  
GTAAAGGAGGACAGGTGCCTTTAGGAGGATTTTGTACATGCAGGAGCAACATCCCAGT  
>HPV101\_Unclassified\_109390389\_nt5548\_L1\_Tile\_rc|1  
CAACTGTAAAGGAGGACAGGTGCCTTTAGGAGGATTTTGTACATGCAGGAGCAACATC  
>HPV101\_Unclassified\_109390389\_nt5558\_L1\_Tile\_rc|1  
CAGAGGACACCAACTGTAAAGGAGGACAGGTGCCTTTAGGAGGATTTTGTACATGCAG  
>HPV101\_Unclassified\_109390389\_nt5563\_L1\_Tile\_rc|1  
AATAACAGAGGACACCAACTGTAAAGGAGGACAGGTGCCTTTAGGAGGATTTTGTACACA  
>HPV101\_Unclassified\_109390389\_nt5568\_L1\_Tile\_rc|1  
TCCTGAATAACAGAGGACACCAACTGTAAAGGAGGACAGGTGCCTTTAGGAGGATTTTGT

>HPV101\_Unclassified\_109390389\_nt5658\_L1\_Tile\_rc|1  
TCTGCAACAATATCTAGGGGTACCCCTGAGTGATCAGCCTGCAAGGCAGCAAAATTCATG  
>HPV101\_Unclassified\_109390389\_nt5663\_L1\_Tile\_rc|1  
AAGTATCTGCAACAATATCTAGGGGTACCCCTGAGTGATCAGCCTGCAAGGCAGCAAAAT  
>HPV101\_Unclassified\_109390389\_nt5668\_L1\_Tile\_rc|1  
TTTACAAGTATCTGCAACAATATCTAGGGGTACCCCTGAGTGATCAGCCTGCAAGGCAGC  
>HPV101\_Unclassified\_109390389\_nt5678\_L1\_Tile\_rc|1  
AGTCTGGCCATTTACAAGTATCTGCAACAATATCTAGGGGTACCCCTGAGTGATCAGCCT  
>HPV101\_Unclassified\_109390389\_nt5683\_L1\_Tile\_rc|1  
AAGAAAGTCTGGCCATTTACAAGTATCTGCAACAATATCTAGGGGTACCCCTGAGTGATC  
>HPV101\_Unclassified\_109390389\_nt5688\_L1\_Tile\_rc|1  
ATACCAAGAAAGTCTGGCCATTTACAAGTATCTGCAACAATATCTAGGGGTACCCCTGAG  
>HPV101\_Unclassified\_109390389\_nt5698\_L1\_Tile\_rc|1  
ATCATTGGCCATACCAAGAAAGTCTGGCCATTTACAAGTATCTGCAACAATATCTAGGGG  
>HPV101\_Unclassified\_109390389\_nt5723\_L1\_Tile\_rc|1  
AGAAAAACATACCATCCCCAAACCTATCATTGGCCATACCAAGAAAGTCTGGCCATTTAC  
>HPV101\_Unclassified\_109390389\_nt5743\_L1\_Tile\_rc|1  
CACCTGCTCGCGGCGGCCAAAGAAAAACATACCATCCCCAAACCTATCATTGGCCATACC  
>HPV101\_Unclassified\_109390389\_nt5748\_L1\_Tile\_rc|1  
GCATACACCTGCTCGCGGCGGCCAAAGAAAAACATACCATCCCCAAACCTATCATTGGCC  
>HPV101\_Unclassified\_109390389\_nt5758\_L1\_Tile\_rc|1  
ATAATGACGTGCATACACCTGCTCGCGGCGGCCAAAGAAAAACATACCATCCCCAAACCT  
>HPV101\_Unclassified\_109390389\_nt5763\_L1\_Tile\_rc|1  
GTGAAATAATGACGTGCATACACCTGCTCGCGGCGGCCAAAGAAAAACATACCATCCCCA  
>HPV101\_Unclassified\_109390389\_nt5768\_L1\_Tile\_rc|1  
TATGGGTGAAATAATGACGTGCATACACCTGCTCGCGGCGGCCAAAGAAAAACATACCAT  
>HPV101\_Unclassified\_109390389\_nt5773\_L1\_Tile\_rc|1  
GCCATTATGGGTGAAATAATGACGTGCATACACCTGCTCGCGGCGGCCAAAGAAAAACAT  
>HPV101\_Unclassified\_109390389\_nt5778\_L1\_Tile\_rc|1  
ACAGTGCCATTATGGGTGAAATAATGACGTGCATACACCTGCTCGCGGCGGCCAAAGAAA  
>HPV101\_Unclassified\_109390389\_nt5793\_L1\_Tile\_rc|1  
GGAACACTGTCACCAACAGTGCCATTATGGGTGAAATAATGACGTGCATACACCTGCTCG  
>HPV101\_Unclassified\_109390389\_nt5798\_L1\_Tile\_rc|1  
CCTCTGGAACACTGTCACCAACAGTGCCATTATGGGTGAAATAATGACGTGCATACACCT  
>HPV101\_Unclassified\_109390389\_nt5808\_L1\_Tile\_rc|1  
TCAAACCCCTCCTCTGGAACACTGTCACCAACAGTGCCATTATGGGTGAAATAATGACGT  
>HPV101\_Unclassified\_109390389\_nt5818\_L1\_Tile\_rc|1  
ACCATTACCCCTCAAACCCCTCCTCTGGAACACTGTCACCAACAGTGCCATTATGGGTGAA  
>HPV101\_Unclassified\_109390389\_nt5828\_L1\_Tile\_rc|1  
AATACTTTTTTACCATTACCCTCAAACCCCTCCTCTGGAACACTGTCACCAACAGTGCCAT  
>HPV101\_Unclassified\_109390389\_nt5833\_L1\_Tile\_rc|1  
AATAAAATACTTTTTTACCATTACCCTCAAACCCCTCCTCTGGAACACTGTCACCAACAGT  
>HPV101\_Unclassified\_109390389\_nt5848\_L1\_Tile\_rc|1  
GCCTTGCTCAGCACCAATAAAATACTTTTTTACCATTACCCTCAAACCCCTCCTCTGGAAC  
>HPV101\_Unclassified\_109390389\_nt5863\_L1\_Tile\_rc|1  
CTGATGCTGGTCCTGGCCTTGCTCAGCACCAATAAAATACTTTTTTACCATTACCCTCAA  
>HPV101\_Unclassified\_109390389\_nt5868\_L1\_Tile\_rc|1  
GCCAGCTGATGCTGGTCCTGGCCTTGCTCAGCACCAATAAAATACTTTTTTACCATTACCC  
>HPV101\_Unclassified\_109390389\_nt5878\_L1\_Tile\_rc|1  
TAAAGAGGGAGCCAGCTGATGCTGGTCCTGGCCTTGCTCAGCACCAATAAAATACTTTTT  
>HPV101\_Unclassified\_109390389\_nt5883\_L1\_Tile\_rc|1  
AAATATAAAGAGGGAGCCAGCTGATGCTGGTCCTGGCCTTGCTCAGCACCAATAAAATAC  
>HPV101\_Unclassified\_109390389\_nt5888\_L1\_Tile\_rc|1  
TAGCAAAATATAAAGAGGGAGCCAGCTGATGCTGGTCCTGGCCTTGCTCAGCACCAATAA  
>HPV101\_Unclassified\_109390389\_nt5893\_L1\_Tile\_rc|1

AGGTGTAGCAAAATATAAAGAGGGAGCCAGCTGATGCTGGTCCTGGCCTTGCTCAGCACC  
>HPV101\_Unclassified\_109390389\_nt5913\_L1\_Tile\_rc|1  
CTAGATGCTAAGGACCCACTAGGTGTAGCAAAATATAAAGAGGGAGCCAGCTGATGCTGG  
>HPV101\_Unclassified\_109390389\_nt5918\_L1\_Tile\_rc|1  
AGTCACTAGATGCTAAGGACCCACTAGGTGTAGCAAAATATAAAGAGGGAGCCAGCTGAT  
>HPV101\_Unclassified\_109390389\_nt5928\_L1\_Tile\_rc|1  
AATAACTGGGAGTCACTAGATGCTAAGGACCCACTAGGTGTAGCAAAATATAAAGAGGGA  
>HPV101\_Unclassified\_109390389\_nt5933\_L1\_Tile\_rc|1  
TACTAAATAACTGGGAGTCACTAGATGCTAAGGACCCACTAGGTGTAGCAAAATATAAAG  
>HPV101\_Unclassified\_109390389\_nt5958\_L1\_Tile\_rc|1  
TGAGCCCGTTCAATCCAGTAGGGCCTACTAAATAACTGGGAGTCACTAGATGCTAAGGAC  
>HPV101\_Unclassified\_109390389\_nt5978\_L1\_Tile\_rc|1  
ATACAGCATTATTAGCACCCCTGAGCCCGTTCAATCCAGTAGGGCCTACTAAATAACTGGG  
>HPV101\_Unclassified\_109390389\_nt5983\_L1\_Tile\_rc|1  
CCATAATACAGCATTATTAGCACCCCTGAGCCCGTTCAATCCAGTAGGGCCTACTAAATAA  
>HPV101\_Unclassified\_109390389\_nt5988\_L1\_Tile\_rc|1  
TTATTCCATAATACAGCATTATTAGCACCCCTGAGCCCGTTCAATCCAGTAGGGCCTACTA  
>HPV101\_Unclassified\_109390389\_nt5993\_L1\_Tile\_rc|1  
CATTATTATTCCATAATACAGCATTATTAGCACCCCTGAGCCCGTTCAATCCAGTAGGGCC  
>HPV101\_Unclassified\_109390389\_nt5998\_L1\_Tile\_rc|1  
AAATACATTATTATTCCATAATACAGCATTATTAGCACCCCTGAGCCCGTTCAATCCAGTA  
>HPV101\_Unclassified\_109390389\_nt6003\_L1\_Tile\_rc|1  
GTAACAAATACATTATTATTCCATAATACAGCATTATTAGCACCCCTGAGCCCGTTCAATC  
>HPV101\_Unclassified\_109390389\_nt6008\_L1\_Tile\_rc|1  
CCAAAGTAACAAATACATTATTATTCCATAATACAGCATTATTAGCACCCCTGAGCCCGTT  
>HPV101\_Unclassified\_109390389\_nt6018\_L1\_Tile\_rc|1  
GTATTATCAACCAAAGTAACAAATACATTATTATTCCATAATACAGCATTATTAGCACCC  
>HPV101\_Unclassified\_109390389\_nt6023\_L1\_Tile\_rc|1  
TGTGGGTATTATCAACCAAAGTAACAAATACATTATTATTCCATAATACAGCATTATTAG  
>HPV101\_Unclassified\_109390389\_nt6033\_L1\_Tile\_rc|1  
AAATTCACATTGTGGGTATTATCAACCAAAGTAACAAATACATTATTATTCCATAATACA  
>HPV101\_Unclassified\_109390389\_nt6038\_L1\_Tile\_rc|1  
TAGTAAAATTCACATTGTGGGTATTATCAACCAAAGTAACAAATACATTATTATTCCATA  
>HPV101\_Unclassified\_109390389\_nt6043\_L1\_Tile\_rc|1  
ATTAATAGTAAAATTCACATTGTGGGTATTATCAACCAAAGTAACAAATACATTATTATT  
>HPV101\_Unclassified\_109390389\_nt6048\_L1\_Tile\_rc|1  
GCAACATTAATAGTAAAATTCACATTGTGGGTATTATCAACCAAAGTAACAAATACATTA  
>HPV101\_Unclassified\_109390389\_nt6053\_L1\_Tile\_rc|1  
CTGTAGCAACATTAATAGTAAAATTCACATTGTGGGTATTATCAACCAAAGTAACAAATA  
>HPV101\_Unclassified\_109390389\_nt6058\_L1\_Tile\_rc|1  
ATCTTCTGTAGCAACATTAATAGTAAAATTCACATTGTGGGTATTATCAACCAAAGTAAC  
>HPV101\_Unclassified\_109390389\_nt6063\_L1\_Tile\_rc|1  
ATATTATCTTCTGTAGCAACATTAATAGTAAAATTCACATTGTGGGTATTATCAACCAAA  
>HPV101\_Unclassified\_109390389\_nt6068\_L1\_Tile\_rc|1  
ACTGAATATTATCTTCTGTAGCAACATTAATAGTAAAATTCACATTGTGGGTATTATCAA  
>HPV101\_Unclassified\_109390389\_nt6073\_L1\_Tile\_rc|1  
ATAGGACTGAATATTATCTTCTGTAGCAACATTAATAGTAAAATTCACATTGTGGGTATT  
>HPV101\_Unclassified\_109390389\_nt6078\_L1\_Tile\_rc|1  
GAATCATAGGACTGAATATTATCTTCTGTAGCAACATTAATAGTAAAATTCACATTGTGG  
>HPV101\_Unclassified\_109390389\_nt6088\_L1\_Tile\_rc|1  
GTACTTTGCAGAATCATAGGACTGAATATTATCTTCTGTAGCAACATTAATAGTAAAATT  
>HPV101\_Unclassified\_109390389\_nt6093\_L1\_Tile\_rc|1  
TGCTTGTACTTTGCAGAATCATAGGACTGAATATTATCTTCTGTAGCAACATTAATAGTA  
>HPV101\_Unclassified\_109390389\_nt6098\_L1\_Tile\_rc|1  
GGTAGTGCTTGTACTTTGCAGAATCATAGGACTGAATATTATCTTCTGTAGCAACATTA

>HPV101\_Unclassified\_109390389\_nt6103\_L1\_Tile\_rc|1  
TCTGAGGTAGTGCTTGTACTTTGCAGAATCATAGGACTGAATATTATCTTCTGTAGCAAC  
>HPV101\_Unclassified\_109390389\_nt6108\_L1\_Tile\_rc|1  
ACATGTCTGAGGTAGTGCTTGTACTTTGCAGAATCATAGGACTGAATATTATCTTCTGTA  
>HPV101\_Unclassified\_109390389\_nt6113\_L1\_Tile\_rc|1  
CCTCCACATGTCTGAGGTAGTGCTTGTACTTTGCAGAATCATAGGACTGAATATTATCTT  
>HPV101\_Unclassified\_109390389\_nt6118\_L1\_Tile\_rc|1  
AAATTCCTCCACATGTCTGAGGTAGTGCTTGTACTTTGCAGAATCATAGGACTGAATATT  
>HPV101\_Unclassified\_109390389\_nt6123\_L1\_Tile\_rc|1  
ATTTCAAATTCCTCCACATGTCTGAGGTAGTGCTTGTACTTTGCAGAATCATAGGACTGA  
>HPV101\_Unclassified\_109390389\_nt6128\_L1\_Tile\_rc|1  
GAGAAATTTCAAATTCCTCCACATGTCTGAGGTAGTGCTTGTACTTTGCAGAATCATAGG  
>HPV101\_Unclassified\_109390389\_nt6133\_L1\_Tile\_rc|1  
AATGAGAGAAATTTCAAATTCCTCCACATGTCTGAGGTAGTGCTTGTACTTTGCAGAATC  
>HPV101\_Unclassified\_109390389\_nt6138\_L1\_Tile\_rc|1  
TGCACAATGAGAGAAATTTCAAATTCCTCCACATGTCTGAGGTAGTGCTTGTACTTTGCA  
>HPV101\_Unclassified\_109390389\_nt6143\_L1\_Tile\_rc|1  
AGAGCTGCACAATGAGAGAAATTTCAAATTCCTCCACATGTCTGAGGTAGTGCTTGTACT  
>HPV101\_Unclassified\_109390389\_nt6158\_L1\_Tile\_rc|1  
TAAGAGACACTTTACAGAGCTGCACAATGAGAGAAATTTCAAATTCCTCCACATGTCTGA  
>HPV101\_Unclassified\_109390389\_nt6163\_L1\_Tile\_rc|1  
GGGAGTAAGAGACACTTTACAGAGCTGCACAATGAGAGAAATTTCAAATTCCTCCACATG  
>HPV101\_Unclassified\_109390389\_nt6173\_L1\_Tile\_rc|1  
CCAATACATCGGGAGTAAGAGACACTTTACAGAGCTGCACAATGAGAGAAATTTCAAATT  
>HPV101\_Unclassified\_109390389\_nt6178\_L1\_Tile\_rc|1  
GTGTGCCAATACATCGGGAGTAAGAGACACTTTACAGAGCTGCACAATGAGAGAAATTTTC  
>HPV101\_Unclassified\_109390389\_nt6183\_L1\_Tile\_rc|1  
TGTATGTGTGCCAATACATCGGGAGTAAGAGACACTTTACAGAGCTGCACAATGAGAGAA  
>HPV101\_Unclassified\_109390389\_nt6193\_L1\_Tile\_rc|1  
ATTCATTAAAGTGTATGTGTGCCAATACATCGGGAGTAAGAGACACTTTACAGAGCTGCAC  
>HPV101\_Unclassified\_109390389\_nt6198\_L1\_Tile\_rc|1  
GAGGGATTCATTAAAGTGTATGTGTGCCAATACATCGGGAGTAAGAGACACTTTACAGAGC  
>HPV101\_Unclassified\_109390389\_nt6203\_L1\_Tile\_rc|1  
GAATAGAGGGATTCATTAAAGTGTATGTGTGCCAATACATCGGGAGTAAGAGACACTTTAC  
>HPV101\_Unclassified\_109390389\_nt6208\_L1\_Tile\_rc|1  
ATCCAGAATAGAGGGATTCATTAAAGTGTATGTGTGCCAATACATCGGGAGTAAGAGACAC  
>HPV101\_Unclassified\_109390389\_nt6213\_L1\_Tile\_rc|1  
CATTCATCCAGAATAGAGGGATTCATTAAAGTGTATGTGTGCCAATACATCGGGAGTAAGA  
>HPV101\_Unclassified\_109390389\_nt6218\_L1\_Tile\_rc|1  
ATTGCCATTCATCCAGAATAGAGGGATTCATTAAAGTGTATGTGTGCCAATACATCGGGAG  
>HPV101\_Unclassified\_109390389\_nt6223\_L1\_Tile\_rc|1  
ACCTAATTGCCATTCATCCAGAATAGAGGGATTCATTAAAGTGTATGTGTGCCAATACATC  
>HPV101\_Unclassified\_109390389\_nt6238\_L1\_Tile\_rc|1  
CGGTGGAGCCGCAATACCTAATTGCCATTCATCCAGAATAGAGGGATTCATTAAAGTGTAT  
>HPV101\_Unclassified\_109390389\_nt6243\_L1\_Tile\_rc|1  
GTAGACGGTGGAGCCGCAATACCTAATTGCCATTCATCCAGAATAGAGGGATTCATTAAAG  
>HPV101\_Unclassified\_109390389\_nt6248\_L1\_Tile\_rc|1  
TAGAGGTAGACGGTGGAGCCGCAATACCTAATTGCCATTCATCCAGAATAGAGGGATTCA  
>HPV101\_Unclassified\_109390389\_nt6253\_L1\_Tile\_rc|1  
TTCAATAGAGGTAGACGGTGGAGCCGCAATACCTAATTGCCATTCATCCAGAATAGAGGG  
>HPV101\_Unclassified\_109390389\_nt6263\_L1\_Tile\_rc|1  
TGTAAGTGGTTTCAATAGAGGTAGACGGTGGAGCCGCAATACCTAATTGCCATTCATCCA  
>HPV101\_Unclassified\_109390389\_nt6268\_L1\_Tile\_rc|1  
ATATCTGTAAAGTGGTTTCAATAGAGGTAGACGGTGGAGCCGCAATACCTAATTGCCATTTC  
>HPV101\_Unclassified\_109390389\_nt6273\_L1\_Tile\_rc|1

TCAATATATCTGTAAGTGGTTTCAATAGAGGTAGACGGTGGAGCCGCAATACCTAATTGC  
>HPV101\_Unclassified\_109390389\_nt6278\_L1\_Tile\_rc|1  
GAGAATCAATATATCTGTAAGTGGTTTCAATAGAGGTAGACGGTGGAGCCGCAATACCTA  
>HPV101\_Unclassified\_109390389\_nt6283\_L1\_Tile\_rc|1  
AGCAAGAGAATCAATATATCTGTAAGTGGTTTCAATAGAGGTAGACGGTGGAGCCGCAAT  
>HPV101\_Unclassified\_109390389\_nt6303\_L1\_Tile\_rc|1  
TCTGCTGTGGGACACATTGTAGCAAGAGAATCAATATATCTGTAAGTGGTTTCAATAGAG  
>HPV101\_Unclassified\_109390389\_nt6343\_L1\_Tile\_rc|1  
AGACATTTTGTTCATATGGATCTTCTTTTCTTAGGAGGCTCTGCTGTGGGACACATTGT  
>HPV101\_Unclassified\_109390389\_nt6383\_L1\_Tile\_rc|1  
ATTCAGAGGACATTCTGTCTGATAAATCAACCACCCAAAAAGACATTTTGTTCATATGGAT  
>HPV101\_Unclassified\_109390389\_nt6388\_L1\_Tile\_rc|1  
CCCTAATTCAGAGGACATTCTGTCTGATAAATCAACCACCCAAAAAGACATTTTGTTCATA  
>HPV101\_Unclassified\_109390389\_nt6393\_L1\_Tile\_rc|1  
TAGGCCCCCTAATTCAGAGGACATTCTGTCTGATAAATCAACCACCCAAAAAGACATTTTG  
>HPV101\_Unclassified\_109390389\_nt6398\_L1\_Tile\_rc|1  
GAGGATAGGCCCTAATTCAGAGGACATTCTGTCTGATAAATCAACCACCCAAAAAGACA  
>HPV101\_Unclassified\_109390389\_nt6403\_L1\_Tile\_rc|1  
ACCAAGAGGATAGGCCCTAATTCAGAGGACATTCTGTCTGATAAATCAACCACCCAAAA  
>HPV101\_Unclassified\_109390389\_nt6413\_L1\_Tile\_rc|1  
AAAAGCGCCTACCAAGAGGATAGGCCCTAATTCAGAGGACATTCTGTCTGATAAATCAA  
>HPV101\_Unclassified\_109390389\_nt6418\_L1\_Tile\_rc|1  
ATGTAAAAAGCGCCTACCAAGAGGATAGGCCCTAATTCAGAGGACATTCTGTCTGATAA  
>HPV101\_Unclassified\_109390389\_nt6423\_L1\_Tile\_rc|1  
GTTTGTATGTAAAAAGCGCCTACCAAGAGGATAGGCCCTAATTCAGAGGACATTCTGTCT  
>HPV101\_Unclassified\_109390389\_nt6433\_L1\_Tile\_rc|1  
GGCAGACCTGTTTGTATGTAAAAAGCGCCTACCAAGAGGATAGGCCCTAATTCAGAGGA  
>HPV101\_Unclassified\_109390389\_nt6453\_L1\_Tile\_rc|1  
TTTAGGGGGCGCGCAGGCCGGGCAGACCCTGTTTGTATGTAAAAAGCGCCTACCAAGAGGA  
>HPV101\_Unclassified\_109390389\_nt6458\_L1\_Tile\_rc|1  
GTCGCTTTAGGGGGCGCGCAGGCCGGGCAGACCCTGTTTGTATGTAAAAAGCGCCTACCAA  
>HPV101\_Unclassified\_109390389\_nt6468\_L1\_Tile\_rc|1  
GAAGGACGGGGTCGCTTTAGGGGGCGCGCAGGCCGGGCAGACCCTGTTTGTATGTAAAAAG  
>HPV101\_Unclassified\_109390389\_nt6473\_L1\_Tile\_rc|1  
GCGTAGAAGGACGGGGTCGCTTTAGGGGGCGCGCAGGCCGGGCAGACCCTGTTTGTATGTA  
>HPV101\_Unclassified\_109390389\_nt6518\_L1\_Tile\_rc|1  
CTTGCCCTGCGTCGGCGTTTGAAGACCTGGAGGTAGGCCTGGTAGGCGTAGAAGGACGGG  
>HPV101\_Unclassified\_109390389\_nt6523\_L1\_Tile\_rc|1  
TTAAACTTGCCCTGCGTCGGCGTTTGAAGACCTGGAGGTAGGCCTGGTAGGCGTAGAAGG  
>HPV102\_Alpha\_71726718\_nt5359\_L1\_Tile\_rc|1  
AGCAATGGAAGGCTGCAAGGGGCGAAGTTCAATATGCTCTGCACCTGCAATAGGACTAAT  
>HPV102\_Alpha\_71726718\_nt5364\_L1\_Tile\_rc|1  
GCAGTAGCAATGGAAGGCTGCAAGGGGCGAAGTTCAATATGCTCTGCACCTGCAATAGGA  
>HPV102\_Alpha\_71726718\_nt5379\_L1\_Tile\_rc|1  
AAGGAGTCCCCTGGGGCAGTAGCAATGGAAGGCTGCAAGGGGCGAAGTTCAATATGCTCT  
>HPV102\_Alpha\_71726718\_nt5384\_L1\_Tile\_rc|1  
CATATAAGGAGTCCCCTGGGGCAGTAGCAATGGAAGGCTGCAAGGGGCGAAGTTCAATAT  
>HPV102\_Alpha\_71726718\_nt5389\_L1\_Tile\_rc|1  
AATATCATATAAGGAGTCCCCTGGGGCAGTAGCAATGGAAGGCTGCAAGGGGCGAAGTTC  
>HPV102\_Alpha\_71726718\_nt5394\_L1\_Tile\_rc|1  
GCATAAATATCATATAAGGAGTCCCCTGGGGCAGTAGCAATGGAAGGCTGCAAGGGGCGA  
>HPV102\_Alpha\_71726718\_nt5399\_L1\_Tile\_rc|1  
TATCAGCATAAATATCATATAAGGAGTCCCCTGGGGCAGTAGCAATGGAAGGCTGCAAGG  
>HPV102\_Alpha\_71726718\_nt5404\_L1\_Tile\_rc|1  
GCCATTATCAGCATAAATATCATATAAGGAGTCCCCTGGGGCAGTAGCAATGGAAGGCTG

>HPV102\_Alpha\_71726718\_nt5409\_L1\_Tile\_rc|1  
AAGTGGCCATTATCAGCATAAAATATCATATAAGGAGTCCCCTGGGGCAGTAGCAATGGAA  
>HPV102\_Alpha\_71726718\_nt5414\_L1\_Tile\_rc|1  
AGTCCAAGTGGCCATTATCAGCATAAAATATCATATAAGGAGTCCCCTGGGGCAGTAGCAA  
>HPV102\_Alpha\_71726718\_nt5419\_L1\_Tile\_rc|1  
CAAGGAGTCCAAGTGGCCATTATCAGCATAAAATATCATATAAGGAGTCCCCTGGGGCAGT  
>HPV102\_Alpha\_71726718\_nt5429\_L1\_Tile\_rc|1  
GTGGAGACGCCAAGGAGTCCAAGTGGCCATTATCAGCATAAAATATCATATAAGGAGTCCC  
>HPV102\_Alpha\_71726718\_nt5434\_L1\_Tile\_rc|1  
AACATGTGGAGACGCCAAGGAGTCCAAGTGGCCATTATCAGCATAAAATATCATATAAGGA  
>HPV102\_Alpha\_71726718\_nt5444\_L1\_Tile\_rc|1  
AAGTATATGAAACATGTGGAGACGCCAAGGAGTCCAAGTGGCCATTATCAGCATAAAATAT  
>HPV102\_Alpha\_71726718\_nt5449\_L1\_Tile\_rc|1  
GGAAGAAGTATATGAAACATGTGGAGACGCCAAGGAGTCCAAGTGGCCATTATCAGCATA  
>HPV102\_Alpha\_71726718\_nt5454\_L1\_Tile\_rc|1  
GACGTGGAAGAAGTATATGAAACATGTGGAGACGCCAAGGAGTCCAAGTGGCCATTATCA  
>HPV102\_Alpha\_71726718\_nt5474\_L1\_Tile\_rc|1  
TTGTAGATTGCAAAGGAACAGACGTGGAAGAAGTATATGAAACATGTGGAGACGCCAAGG  
>HPV102\_Alpha\_71726718\_nt5484\_L1\_Tile\_rc|1  
GCTGAAATATTTGTAGATTGCAAAGGAACAGACGTGGAAGAAGTATATGAAACATGTGGA  
>HPV102\_Alpha\_71726718\_nt5489\_L1\_Tile\_rc|1  
ATGTAGCTGAAATATTTGTAGATTGCAAAGGAACAGACGTGGAAGAAGTATATGAAACAT  
>HPV102\_Alpha\_71726718\_nt5504\_L1\_Tile\_rc|1  
GCGCAGAGACCACAGATGTAGCTGAAATATTTGTAGATTGCAAAGGAACAGACGTGGAAG  
>HPV102\_Alpha\_71726718\_nt5509\_L1\_Tile\_rc|1  
ATACCGCGCAGAGACCACAGATGTAGCTGAAATATTTGTAGATTGCAAAGGAACAGACGT  
>HPV102\_Alpha\_71726718\_nt5514\_L1\_Tile\_rc|1  
TTGTCATACCGCGCAGAGACCACAGATGTAGCTGAAATATTTGTAGATTGCAAAGGAACA  
>HPV102\_Alpha\_71726718\_nt5529\_L1\_Tile\_rc|1  
AGTGGTACTGTGACATTGTCATACCGCGCAGAGACCACAGATGTAGCTGAAATATTTGTA  
>HPV102\_Alpha\_71726718\_nt5534\_L1\_Tile\_rc|1  
AAGAGAGTGGTACTGTGACATTGTCATACCGCGCAGAGACCACAGATGTAGCTGAAATAT  
>HPV102\_Alpha\_71726718\_nt5539\_L1\_Tile\_rc|1  
CCCAGAAGAGAGTGGTACTGTGACATTGTCATACCGCGCAGAGACCACAGATGTAGCTGA  
>HPV102\_Alpha\_71726718\_nt5544\_L1\_Tile\_rc|1  
TCAAACCCAGAAGAGAGTGGTACTGTGACATTGTCATACCGCGCAGAGACCACAGATGTA  
>HPV102\_Alpha\_71726718\_nt5549\_L1\_Tile\_rc|1  
GCAAATCAAACCCAGAAGAGAGTGGTACTGTGACATTGTCATACCGCGCAGAGACCACAG  
>HPV102\_Alpha\_71726718\_nt5554\_L1\_Tile\_rc|1  
TGCAGGCAAATCAAACCCAGAAGAGAGTGGTACTGTGACATTGTCATACCGCGCAGAGAC  
>HPV102\_Alpha\_71726718\_nt5564\_L1\_Tile\_rc|1  
GGCCTGTATATGCAGGCAAATCAAACCCAGAAGAGAGTGGTACTGTGACATTGTCATACC  
>HPV102\_Alpha\_71726718\_nt5574\_L1\_Tile\_rc|1  
GGAATGTCAGGGCCTGTATATGCAGGCAAATCAAACCCAGAAGAGAGTGGTACTGTGACA  
>HPV102\_Alpha\_71726718\_nt5579\_L1\_Tile\_rc|1  
CAATTGGAATGTCAGGGCCTGTATATGCAGGCAAATCAAACCCAGAAGAGAGTGGTACTG  
>HPV102\_Alpha\_71726718\_nt5584\_L1\_Tile\_rc|1  
AGTGGCAATTGGAATGTCAGGGCCTGTATATGCAGGCAAATCAAACCCAGAAGAGAGTGG  
>HPV102\_Alpha\_71726718\_nt5589\_L1\_Tile\_rc|1  
GTAGGAGTGGCAATTGGAATGTCAGGGCCTGTATATGCAGGCAAATCAAACCCAGAAGAG  
>HPV102\_Alpha\_71726718\_nt5594\_L1\_Tile\_rc|1  
TGGTAGTAGGAGTGGCAATTGGAATGTCAGGGCCTGTATATGCAGGCAAATCAAACCCAG  
>HPV102\_Alpha\_71726718\_nt5619\_L1\_Tile\_rc|1  
GAGGACTGGGAAACATGCAGCACACTGGTAGTAGGAGTGGCAATTGGAATGTCAGGGCCT  
>HPV102\_Alpha\_71726718\_nt5624\_L1\_Tile\_rc|1

CATTAGAGGACTGGGAAACATGCAGCACACTGGTAGTAGGAGTGGCAATTGGAATGTCAG  
>HPV102\_Alpha\_71726718\_nt5629\_L1\_Tile\_rc|1  
AGGAACATTAGAGGACTGGGAAACATGCAGCACACTGGTAGTAGGAGTGGCAATTGGAAT  
>HPV102\_Alpha\_71726718\_nt5639\_L1\_Tile\_rc|1  
CAGATTGGGAAGGAACATTAGAGGACTGGGAAACATGCAGCACACTGGTAGTAGGAGTGG  
>HPV102\_Alpha\_71726718\_nt5644\_L1\_Tile\_rc|1  
AAACACAGATTGGGAAGGAACATTAGAGGACTGGGAAACATGCAGCACACTGGTAGTAGG  
>HPV102\_Alpha\_71726718\_nt5649\_L1\_Tile\_rc|1  
TCCACAAACACAGATTGGGAAGGAACATTAGAGGACTGGGAAACATGCAGCACACTGGTA  
>HPV102\_Alpha\_71726718\_nt5669\_L1\_Tile\_rc|1  
ATAAAAAATAGTCTGTACCATCCACAAACACAGATTGGGAAGGAACATTAGAGGACTGGG  
>HPV102\_Alpha\_71726718\_nt5679\_L1\_Tile\_rc|1  
TAATTAGGCAATAAAAAATAGTCTGTACCATCCACAAACACAGATTGGGAAGGAACATTA  
>HPV102\_Alpha\_71726718\_nt5684\_L1\_Tile\_rc|1  
ATAAGTAATTAGGCAATAAAAAATAGTCTGTACCATCCACAAACACAGATTGGGAAGGAA  
>HPV102\_Alpha\_71726718\_nt5694\_L1\_Tile\_rc|1  
TTAGGAAAGAATAAGTAATTAGGCAATAAAAAATAGTCTGTACCATCCACAAACACAGAT  
>HPV102\_Alpha\_71726718\_nt6219\_L1\_Tile\_rc|1  
TAGGGGGTTTACACCCAATAATAAGTAGTTGGGTTTGTGTTGTAATCTACAGAAACATTGT  
>HPV102\_Alpha\_71726718\_nt6224\_L1\_Tile\_rc|1  
CCCAATAGGGGTTTACACCCAATAATAAGTAGTTGGGTTTGTGTTGTAATCTACAGAAAC  
>HPV102\_Alpha\_71726718\_nt6559\_L1\_Tile\_rc|1  
GGTATGTAATAGGAGGCAGGGAGTTTCCTCGCCCATGGTTCCATGTCTGTAAAGAAATGC  
>HPV102\_Alpha\_71726718\_nt6579\_L1\_Tile\_rc|1  
TATTATTTCCAGAGGTGCCAGGTATGTAATAGGAGGCAGGGAGTTCTCGCCCATGGTTC  
>HPV102\_Alpha\_71726718\_nt6584\_L1\_Tile\_rc|1  
TTGTCTATTATTTCCAGAGGTGCCAGGTATGTAATAGGAGGCAGGGAGTTCTCGCCCAT  
>HPV102\_Alpha\_71726718\_nt6589\_L1\_Tile\_rc|1  
GGAGTTTGTCTATTATTTCCAGAGGTGCCAGGTATGTAATAGGAGGCAGGGAGTTCTCTG  
>HPV102\_Alpha\_71726718\_nt6604\_L1\_Tile\_rc|1  
TATACATAACTGGTAGGAGTTTGTCTATTATTTCCAGAGGTGCCAGGTATGTAATAGGAG  
>HPV102\_Alpha\_71726718\_nt6609\_L1\_Tile\_rc|1  
GGGCATATACATAACTGGTAGGAGTTTGTCTATTATTTCCAGAGGTGCCAGGTATGTAAT  
>HPV102\_Alpha\_71726718\_nt7109\_L1\_Tile\_rc|1  
CAGATCCATAGACAGTTTGTCTTTGAGATCCACCTCCCAAAAAGCAAGGCCATCATATGG  
>HPV102\_Alpha\_71726718\_nt7114\_L1\_Tile\_rc|1  
TGATCCAGATCCATAGACAGTTTGTCTTTGAGATCCACCTCCCAAAAAGCAAGGCCATCA  
>HPV103\_Unclassified\_109390382\_nt4981\_L1\_Tile\_rc|1  
GTTTCCACAACGTATTCATCAGTAGGCAGTATTTTAGCCACTGGCTGAGAAGGTGGTAGA  
>HPV103\_Unclassified\_109390382\_nt4986\_L1\_Tile\_rc|1  
TAGACGTTTCCACAACGTATTCATCAGTAGGCAGTATTTTAGCCACTGGCTGAGAAGGTG  
>HPV103\_Unclassified\_109390382\_nt4991\_L1\_Tile\_rc|1  
GAAAATAGACGTTTCCACAACGTATTCATCAGTAGGCAGTATTTTAGCCACTGGCTGAGA  
>HPV103\_Unclassified\_109390382\_nt4996\_L1\_Tile\_rc|1  
TGGAAGAAAATAGACGTTTCCACAACGTATTCATCAGTAGGCAGTATTTTAGCCACTGGC  
>HPV103\_Unclassified\_109390382\_nt5016\_L1\_Tile\_rc|1  
GCAGGCGGTCGCTGGAGGCATGGAAGAAAATAGACGTTTCCACAACGTATTCATCAGTAG  
>HPV103\_Unclassified\_109390382\_nt5021\_L1\_Tile\_rc|1  
AGTAAGCAGGCGGTCGCTGGAGGCATGGAAGAAAATAGACGTTTCCACAACGTATTCATC  
>HPV103\_Unclassified\_109390382\_nt5031\_L1\_Tile\_rc|1  
GGTGTCTACAGTAAGCAGGCGGTCGCTGGAGGCATGGAAGAAAATAGACGTTTCCACAA  
>HPV103\_Unclassified\_109390382\_nt5076\_L1\_Tile\_rc|1  
GTACAACAATTGTACCTTCACCCACTTTTGTAAATTGGAAAATATGGGTGTCCTACAGTAA  
>HPV103\_Unclassified\_109390382\_nt5081\_L1\_Tile\_rc|1  
CTTAGGTACAACAATTGTACCTTCACCCACTTTTGTAAATTGGAAAATATGGGTGTCCTAC



>HPV103\_Unclassified\_109390382\_nt5086\_L1\_Tile\_rc|1  
GATACCTTAGGTACAACAATTGTACCTTCACCCACTTTTGTAAATTGGAAAATATGGGTGT  
>HPV103\_Unclassified\_109390382\_nt5091\_L1\_Tile\_rc|1  
TACCAGATACCTTAGGTACAACAATTGTACCTTCACCCACTTTTGTAAATTGGAAAATATG  
>HPV103\_Unclassified\_109390382\_nt5096\_L1\_Tile\_rc|1  
TTGATTACCAGATACCTTAGGTACAACAATTGTACCTTCACCCACTTTTGTAAATTGGAAA  
>HPV103\_Unclassified\_109390382\_nt5101\_L1\_Tile\_rc|1  
CTGAATTGATTACCAGATACCTTAGGTACAACAATTGTACCTTCACCCACTTTTGTAAATT  
>HPV103\_Unclassified\_109390382\_nt5106\_L1\_Tile\_rc|1  
AGGCCCTGAATTGATTACCAGATACCTTAGGTACAACAATTGTACCTTCACCCACTTTTG  
>HPV103\_Unclassified\_109390382\_nt5116\_L1\_Tile\_rc|1  
AGGATGTGAAAGGCCCTGAATTGATTACCAGATACCTTAGGTACAACAATTGTACCTTCA  
>HPV103\_Unclassified\_109390382\_nt5121\_L1\_Tile\_rc|1  
GTAAAAGGATGTGAAAGGCCCTGAATTGATTACCAGATACCTTAGGTACAACAATTGTAC  
>HPV103\_Unclassified\_109390382\_nt5141\_L1\_Tile\_rc|1  
TGCCAACTTGTTAGGATCAGGTAAAAGGATGTGAAAGGCCCTGAATTGATTACCAGATAC  
>HPV103\_Unclassified\_109390382\_nt5146\_L1\_Tile\_rc|1  
ACAAGTGCCAACTTGTTAGGATCAGGTAAAAGGATGTGAAAGGCCCTGAATTGATTACCA  
>HPV103\_Unclassified\_109390382\_nt5151\_L1\_Tile\_rc|1  
AATCCACAAGTGCCAACTTGTTAGGATCAGGTAAAAGGATGTGAAAGGCCCTGAATTGAT  
>HPV103\_Unclassified\_109390382\_nt5161\_L1\_Tile\_rc|1  
TATATATTGGAATCCACAAGTGCCAACTTGTTAGGATCAGGTAAAAGGATGTGAAAGGCC  
>HPV103\_Unclassified\_109390382\_nt5166\_L1\_Tile\_rc|1  
CATTATATATATTGGAATCCACAAGTGCCAACTTGTTAGGATCAGGTAAAAGGATGTGAA  
>HPV103\_Unclassified\_109390382\_nt5171\_L1\_Tile\_rc|1  
CTCGGCATTATATATATTGGAATCCACAAGTGCCAACTTGTTAGGATCAGGTAAAAGGAT  
>HPV103\_Unclassified\_109390382\_nt5176\_L1\_Tile\_rc|1  
TCTGACTCGGCATTATATATATTGGAATCCACAAGTGCCAACTTGTTAGGATCAGGTAAA  
>HPV103\_Unclassified\_109390382\_nt5181\_L1\_Tile\_rc|1  
GCCGTTCTGACTCGGCATTATATATATTGGAATCCACAAGTGCCAACTTGTTAGGATCAG  
>HPV103\_Unclassified\_109390382\_nt5186\_L1\_Tile\_rc|1  
AACAAGCCGTTCTGACTCGGCATTATATATATTGGAATCCACAAGTGCCAACTTGTTAGG  
>HPV103\_Unclassified\_109390382\_nt5191\_L1\_Tile\_rc|1  
TTCCAAACAAGCCGTTCTGACTCGGCATTATATATATTGGAATCCACAAGTGCCAACTTG  
>HPV103\_Unclassified\_109390382\_nt5201\_L1\_Tile\_rc|1  
ACCCCGTAACTTCCAAACAAGCCGTTCTGACTCGGCATTATATATATTGGAATCCACAAG  
>HPV103\_Unclassified\_109390382\_nt5206\_L1\_Tile\_rc|1  
TCCAGACCCCGTAACTTCCAAACAAGCCGTTCTGACTCGGCATTATATATATTGGAATCC  
>HPV103\_Unclassified\_109390382\_nt5216\_L1\_Tile\_rc|1  
ACGACCAATATCCAGACCCCGTAACTTCCAAACAAGCCGTTCTGACTCGGCATTATATAT  
>HPV103\_Unclassified\_109390382\_nt5221\_L1\_Tile\_rc|1  
CCACCACGACCAATATCCAGACCCCGTAACTTCCAAACAAGCCGTTCTGACTCGGCATTA  
>HPV103\_Unclassified\_109390382\_nt5226\_L1\_Tile\_rc|1  
GGGGTCCACCACGACCAATATCCAGACCCCGTAACTTCCAAACAAGCCGTTCTGACTCGG  
>HPV103\_Unclassified\_109390382\_nt5231\_L1\_Tile\_rc|1  
GCTAAGGGGTCCACCACGACCAATATCCAGACCCCGTAACTTCCAAACAAGCCGTTCTGA  
>HPV103\_Unclassified\_109390382\_nt5236\_L1\_Tile\_rc|1  
CCAACGCTAAGGGGTCCACCACGACCAATATCCAGACCCCGTAACTTCCAAACAAGCCGT  
>HPV103\_Unclassified\_109390382\_nt5241\_L1\_Tile\_rc|1  
AAGAGCCAACGCTAAGGGGTCCACCACGACCAATATCCAGACCCCGTAACTTCCAAACAA  
>HPV103\_Unclassified\_109390382\_nt5246\_L1\_Tile\_rc|1  
TCCAGAAGAGCCAACGCTAAGGGGTCCACCACGACCAATATCCAGACCCCGTAACTTCCA  
>HPV103\_Unclassified\_109390382\_nt5251\_L1\_Tile\_rc|1  
GGGTGTCCAGAAGAGCCAACGCTAAGGGGTCCACCACGACCAATATCCAGACCCCGTAAAC  
>HPV103\_Unclassified\_109390382\_nt5261\_L1\_Tile\_rc|1

ATTAAATAAAGGGTGTCCAGAAGAGCCAACGCTAAGGGGTCCACCACGACCAATATCCAG  
>HPV103\_Unclassified\_109390382\_nt5271\_L1\_Tile\_rc|1  
CCTTAAGTTTATTAAATAAAGGGTGTCCAGAAGAGCCAACGCTAAGGGGTCCACCACGAC  
>HPV103\_Unclassified\_109390382\_nt5276\_L1\_Tile\_rc|1  
AGTATCCTTAAGTTTATTAAATAAAGGGTGTCCAGAAGAGCCAACGCTAAGGGGTCCACC  
>HPV103\_Unclassified\_109390382\_nt5281\_L1\_Tile\_rc|1  
TTTTCAGTATCCTTAAGTTTATTAAATAAAGGGTGTCCAGAAGAGCCAACGCTAAGGGGT  
>HPV103\_Unclassified\_109390382\_nt5301\_L1\_Tile\_rc|1  
TTTTAACATAACTATTAGGATTTTCAGTATCCTTAAGTTTATTAAATAAAGGGTGTCCAG  
>HPV103\_Unclassified\_109390382\_nt5306\_L1\_Tile\_rc|1  
TCCTGTTTTAACATAACTATTAGGATTTTCAGTATCCTTAAGTTTATTAAATAAAGGGTG  
>HPV103\_Unclassified\_109390382\_nt5311\_L1\_Tile\_rc|1  
TCCTTTCCTGTTTTAACATAACTATTAGGATTTTCAGTATCCTTAAGTTTATTAAATAAA  
>HPV103\_Unclassified\_109390382\_nt5316\_L1\_Tile\_rc|1  
TGTTTTCTTCTGTTTTAACATAACTATTAGGATTTTCAGTATCCTTAAGTTTATTAA  
>HPV103\_Unclassified\_109390382\_nt5321\_L1\_Tile\_rc|1  
TTGTCTGTTTCTTCTGTTTTAACATAACTATTAGGATTTTCAGTATCCTTAAGTTT  
>HPV103\_Unclassified\_109390382\_nt5326\_L1\_Tile\_rc|1  
ACACTTGTCTGTTTCTTCTGTTTTAACATAACTATTAGGATTTTCAGTATCCTTA  
>HPV103\_Unclassified\_109390382\_nt5331\_L1\_Tile\_rc|1  
TAGAGACACTTGTCTGTTTTCTTCTGTTTTAACATAACTATTAGGATTTTCAGTAT  
>HPV103\_Unclassified\_109390382\_nt5336\_L1\_Tile\_rc|1  
GTCCATAGAGACACTTGTCTGTTTTCTTCTGTTTTAACATAACTATTAGGATTTTC  
>HPV103\_Unclassified\_109390382\_nt5341\_L1\_Tile\_rc|1  
TTTGGGTCCATAGAGACACTTGTCTGTTTTCTTCTGTTTTAACATAACTATTAGGA  
>HPV103\_Unclassified\_109390382\_nt5346\_L1\_Tile\_rc|1  
TTTGCTTTGGGTCCATAGAGACACTTGTCTGTTTTCTTCTGTTTTAACATAACTAT  
>HPV103\_Unclassified\_109390382\_nt5356\_L1\_Tile\_rc|1  
AATAGCTGAGTTTGCTTTGGGTCCATAGAGACACTTGTCTGTTTTCTTCTGTTTTA  
>HPV103\_Unclassified\_109390382\_nt5361\_L1\_Tile\_rc|1  
CTACAAATAGCTGAGTTTGCTTTGGGTCCATAGAGACACTTGTCTGTTTTCTTCTG  
>HPV103\_Unclassified\_109390382\_nt5366\_L1\_Tile\_rc|1  
GCCTACTACAAATAGCTGAGTTTGCTTTGGGTCCATAGAGACACTTGTCTGTTTTCTT  
>HPV103\_Unclassified\_109390382\_nt5406\_L1\_Tile\_rc|1  
GCTTTGCAGCATCCCAATGCTCCCCCAAACAAGGAGTACAGCCTACTACAAATAGCTGAG  
>HPV103\_Unclassified\_109390382\_nt5451\_L1\_Tile\_rc|1  
CTAAAGGAGGACATGCACCCATATCCTGCCTAGCATCTGCACATGGCTTTGCAGCATCCC  
>HPV103\_Unclassified\_109390382\_nt5466\_L1\_Tile\_rc|1  
TGGAACATAACAAGCTCTAAAGGAGGACATGCACCCATATCCTGCCTAGCATCTGCACATG  
>HPV103\_Unclassified\_109390382\_nt5471\_L1\_Tile\_rc|1  
AATAATGGAACATAACAAGCTCTAAAGGAGGACATGCACCCATATCCTGCCTAGCATCTGC  
>HPV103\_Unclassified\_109390382\_nt5566\_L1\_Tile\_rc|1  
GAAGCTACAATGTCCAAGGGTACACCTGAATGGTCCTCCTGCAATGTAGCAAAATTCATT  
>HPV103\_Unclassified\_109390382\_nt5571\_L1\_Tile\_rc|1  
ATTTAGAAGCTACAATGTCCAAGGGTACACCTGAATGGTCCTCCTGCAATGTAGCAAAAT  
>HPV103\_Unclassified\_109390382\_nt5576\_L1\_Tile\_rc|1  
TTTACATTTAGAAGCTACAATGTCCAAGGGTACACCTGAATGGTCCTCCTGCAATGTAGC  
>HPV103\_Unclassified\_109390382\_nt5581\_L1\_Tile\_rc|1  
GGCCATTTACATTTAGAAGCTACAATGTCCAAGGGTACACCTGAATGGTCCTCCTGCAAT  
>HPV103\_Unclassified\_109390382\_nt5586\_L1\_Tile\_rc|1  
AATCAGGCCATTTACATTTAGAAGCTACAATGTCCAAGGGTACACCTGAATGGTCCTCCT  
>HPV103\_Unclassified\_109390382\_nt5591\_L1\_Tile\_rc|1  
AAGAAAATCAGGCCATTTACATTTAGAAGCTACAATGTCCAAGGGTACACCTGAATGGTC  
>HPV103\_Unclassified\_109390382\_nt5596\_L1\_Tile\_rc|1  
ATTCTAAGAAAATCAGGCCATTTACATTTAGAAGCTACAATGTCCAAGGGTACACCTGAA

>HPV103\_Unclassified\_109390382\_nt5631\_L1\_Tile\_rc|1  
AGAAAAACATTTGATTGCCATATGTGTCATTTGCCATTCTAAGAAAATCAGGCCATTTAC  
>HPV103\_Unclassified\_109390382\_nt5636\_L1\_Tile\_rc|1  
TCCAAAGAAAAACATTTGATTGCCATATGTGTCATTTGCCATTCTAAGAAAATCAGGCCA  
>HPV103\_Unclassified\_109390382\_nt5646\_L1\_Tile\_rc|1  
GCTCACGTCTTCCAAAGAAAAACATTTGATTGCCATATGTGTCATTTGCCATTCTAAGAA  
>HPV103\_Unclassified\_109390382\_nt5651\_L1\_Tile\_rc|1  
CAACTGCTCACGTCTTCCAAAGAAAAACATTTGATTGCCATATGTGTCATTTGCCATTCT  
>HPV103\_Unclassified\_109390382\_nt5656\_L1\_Tile\_rc|1  
GCATACAACTGCTCACGTCTTCCAAAGAAAAACATTTGATTGCCATATGTGTCATTTGCC  
>HPV103\_Unclassified\_109390382\_nt5661\_L1\_Tile\_rc|1  
GGCGAGCATACAACTGCTCACGTCTTCCAAAGAAAAACATTTGATTGCCATATGTGTCAT  
>HPV103\_Unclassified\_109390382\_nt5671\_L1\_Tile\_rc|1  
GCAAAAAAGTGGCGAGCATACAACTGCTCACGTCTTCCAAAGAAAAACATTTGATTGCCA  
>HPV103\_Unclassified\_109390382\_nt5676\_L1\_Tile\_rc|1  
CCCTAGCAAAAAAGTGGCGAGCATACAACTGCTCACGTCTTCCAAAGAAAAACATTTGAT  
>HPV103\_Unclassified\_109390382\_nt5696\_L1\_Tile\_rc|1  
ACTGTGCGCCCATGACACCATCCCTAGCAAAAAAGTGGCGAGCATACAACTGCTCACGTCT  
>HPV103\_Unclassified\_109390382\_nt5701\_L1\_Tile\_rc|1  
GGTATACTGTCGCCCATGACACCATCCCTAGCAAAAAAGTGGCGAGCATACAACTGCTCA  
>HPV103\_Unclassified\_109390382\_nt5716\_L1\_Tile\_rc|1  
TCAAATTCAGCCTCAGGTATACTGTCGCCCATGACACCATCCCTAGCAAAAAAGTGGCGA  
>HPV103\_Unclassified\_109390382\_nt5721\_L1\_Tile\_rc|1  
CACCCTCAAATTCAGCCTCAGGTATACTGTCGCCCATGACACCATCCCTAGCAAAAAAGT  
>HPV103\_Unclassified\_109390382\_nt5726\_L1\_Tile\_rc|1  
CTTAACACCCTCAAATTCAGCCTCAGGTATACTGTCGCCCATGACACCATCCCTAGCAA  
>HPV103\_Unclassified\_109390382\_nt5731\_L1\_Tile\_rc|1  
GTGTGCTTAACACCCTCAAATTCAGCCTCAGGTATACTGTCGCCCATGACACCATCCCTA  
>HPV103\_Unclassified\_109390382\_nt5741\_L1\_Tile\_rc|1  
TAAATATAGGTGTGCTTAACACCCTCAAATTCAGCCTCAGGTATACTGTCGCCCATGAC  
>HPV103\_Unclassified\_109390382\_nt5746\_L1\_Tile\_rc|1  
CCCTGTAAATATAGGTGTGCTTAACACCCTCAAATTCAGCCTCAGGTATACTGTCGCC  
>HPV103\_Unclassified\_109390382\_nt5766\_L1\_Tile\_rc|1  
TTTGGTCTTTGTGTCAGACGCCCCCTGTAAATATAGGTGTGCTTAACACCCTCAAATTCAG  
>HPV103\_Unclassified\_109390382\_nt5771\_L1\_Tile\_rc|1  
TGTATTTTGGTCTTTGTGTCAGACGCCCCCTGTAAATATAGGTGTGCTTAACACCCTCAA  
>HPV103\_Unclassified\_109390382\_nt5781\_L1\_Tile\_rc|1  
ACGAGGAGGCTGTATTTTGGTCTTTGTGTCAGACGCCCCCTGTAAATATAGGTGTGCTTAA  
>HPV103\_Unclassified\_109390382\_nt5786\_L1\_Tile\_rc|1  
AACAGACGAGGAGGCTGTATTTTGGTCTTTGTGTCAGACGCCCCCTGTAAATATAGGTGTG  
>HPV103\_Unclassified\_109390382\_nt5791\_L1\_Tile\_rc|1  
TAGTAAACAGACGAGGAGGCTGTATTTTGGTCTTTGTGTCAGACGCCCCCTGTAAATATAG  
>HPV103\_Unclassified\_109390382\_nt5811\_L1\_Tile\_rc|1  
GTGATCCACTGGGGGTTGCATAGTAAACAGACGAGGAGGCTGTATTTTGGTCTTTGTGTCAG  
>HPV103\_Unclassified\_109390382\_nt5816\_L1\_Tile\_rc|1  
AACCAGTGATCCACTGGGGGTTGCATAGTAAACAGACGAGGAGGCTGTATTTTGGTCTTT  
>HPV103\_Unclassified\_109390382\_nt5821\_L1\_Tile\_rc|1  
CTAGAAACAGTGATCCACTGGGGGTTGCATAGTAAACAGACGAGGAGGCTGTATTTTGG  
>HPV103\_Unclassified\_109390382\_nt5826\_L1\_Tile\_rc|1  
AATCACTAGAAACAGTGATCCACTGGGGGTTGCATAGTAAACAGACGAGGAGGCTGTAT  
>HPV103\_Unclassified\_109390382\_nt5836\_L1\_Tile\_rc|1  
AACAACCTGAGAATCACTAGAAACAGTGATCCACTGGGGGTTGCATAGTAAACAGACGAG  
>HPV103\_Unclassified\_109390382\_nt5841\_L1\_Tile\_rc|1  
TGCCAAACAACCTGAGAATCACTAGAAACAGTGATCCACTGGGGGTTGCATAGTAAACAG  
>HPV103\_Unclassified\_109390382\_nt5866\_L1\_Tile\_rc|1

TGAGCCTTTTGTATCCAGTATGGTCTGCCAAACAACCTGAGAATCACTAGAAACCAGTGAT  
>HPV103\_Unclassified\_109390382\_nt5886\_L1\_Tile\_rc|1  
ACACACTATTATTAGGGCCCTGAGCCTTTTGTATCCAGTATGGTCTGCCAAACAACCTGAG  
>HPV103\_Unclassified\_109390382\_nt5896\_L1\_Tile\_rc|1  
TTTCTCCAACACACACTATTATTAGGGCCCTGAGCCTTTTGTATCCAGTATGGTCTGCCA  
>HPV103\_Unclassified\_109390382\_nt5901\_L1\_Tile\_rc|1  
AATTATTTCTCCAACACACACTATTATTAGGGCCCTGAGCCTTTTGTATCCAGTATGGTC  
>HPV103\_Unclassified\_109390382\_nt5941\_L1\_Tile\_rc|1  
AAATTTACATTGTGTGTGTTATCAACCAATGTAATAAATAAATTATTTCTCCAACACACA  
>HPV103\_Unclassified\_109390382\_nt5946\_L1\_Tile\_rc|1  
TTGTAAAATTTACATTGTGTGTGTTATCAACCAATGTAATAAATAAATTATTTCTCCAAC  
>HPV103\_Unclassified\_109390382\_nt5951\_L1\_Tile\_rc|1  
ATTTATTGTAAAATTTACATTGTGTGTGTTATCAACCAATGTAATAAATAAATTATTTCT  
>HPV103\_Unclassified\_109390382\_nt5956\_L1\_Tile\_rc|1  
TTAACATTTATTGTAAAATTTACATTGTGTGTGTTATCAACCAATGTAATAAATAAATTA  
>HPV103\_Unclassified\_109390382\_nt5961\_L1\_Tile\_rc|1  
CTGACTTAACATTTATTGTAAAATTTACATTGTGTGTGTTATCAACCAATGTAATAAATA  
>HPV103\_Unclassified\_109390382\_nt5966\_L1\_Tile\_rc|1  
AGCGTCTGACTTAACATTTATTGTAAAATTTACATTGTGTGTGTTATCAACCAATGTAAT  
>HPV103\_Unclassified\_109390382\_nt5971\_L1\_Tile\_rc|1  
ACGCCAGCGTCTGACTTAACATTTATTGTAAAATTTACATTGTGTGTGTTATCAACCAAT  
>HPV103\_Unclassified\_109390382\_nt5976\_L1\_Tile\_rc|1  
GTGCAACGCCAGCGTCTGACTTAACATTTATTGTAAAATTTACATTGTGTGTGTTATCAA  
>HPV103\_Unclassified\_109390382\_nt5986\_L1\_Tile\_rc|1  
GCATATTGCTGTGCAACGCCAGCGTCTGACTTAACATTTATTGTAAAATTTACATTGTGT  
>HPV103\_Unclassified\_109390382\_nt5991\_L1\_Tile\_rc|1  
TGGCAGCATATTGCTGTGCAACGCCAGCGTCTGACTTAACATTTATTGTAAAATTTACAT  
>HPV103\_Unclassified\_109390382\_nt6016\_L1\_Tile\_rc|1  
TGTCGCAGATAATGTTTATAGCTGGTGGCAGCATATTGCTGTGCAACGCCAGCGTCTGAC  
>HPV103\_Unclassified\_109390382\_nt6026\_L1\_Tile\_rc|1  
TTCCTCTACATGTGCGAGATAATGTTTATAGCTGGTGGCAGCATATTGCTGTGCAACGCC  
>HPV103\_Unclassified\_109390382\_nt6031\_L1\_Tile\_rc|1  
TCAAATTCCTCTACATGTGCGAGATAATGTTTATAGCTGGTGGCAGCATATTGCTGTGCA  
>HPV103\_Unclassified\_109390382\_nt6051\_L1\_Tile\_rc|1  
ATTGCAATATAAGAGCAATCTCAAATTCCTCTACATGTGCGAGATAATGTTTATAGCTGG  
>HPV103\_Unclassified\_109390382\_nt6056\_L1\_Tile\_rc|1  
GCATAATTGCAATATAAGAGCAATCTCAAATTCCTCTACATGTGCGAGATAATGTTTATA  
>HPV103\_Unclassified\_109390382\_nt6061\_L1\_Tile\_rc|1  
ACCTTGCAATAATTGCAATATAAGAGCAATCTCAAATTCCTCTACATGTGCGAGATAATGT  
>HPV103\_Unclassified\_109390382\_nt6071\_L1\_Tile\_rc|1  
TGTGAGAGGAACCTTGCAATAATTGCAATATAAGAGCAATCTCAAATTCCTCTACATGTG  
>HPV103\_Unclassified\_109390382\_nt6081\_L1\_Tile\_rc|1  
ATACATCAGCTGTGAGAGGAACCTTGCAATAATTGCAATATAAGAGCAATCTCAAATTCCT  
>HPV103\_Unclassified\_109390382\_nt6086\_L1\_Tile\_rc|1  
GGCTAATACATCAGCTGTGAGAGGAACCTTGCAATAATTGCAATATAAGAGCAATCTCAA  
>HPV103\_Unclassified\_109390382\_nt6091\_L1\_Tile\_rc|1  
ATATGGGCTAATACATCAGCTGTGAGAGGAACCTTGCAATAATTGCAATATAAGAGCAATC  
>HPV103\_Unclassified\_109390382\_nt6096\_L1\_Tile\_rc|1  
CATGTATATGGGCTAATACATCAGCTGTGAGAGGAACCTTGCAATAATTGCAATATAAGAG  
>HPV103\_Unclassified\_109390382\_nt6101\_L1\_Tile\_rc|1  
CATTACATGTATATGGGCTAATACATCAGCTGTGAGAGGAACCTTGCAATAATTGCAATAT  
>HPV103\_Unclassified\_109390382\_nt6106\_L1\_Tile\_rc|1  
GGATCCATTACATGTATATGGGCTAATACATCAGCTGTGAGAGGAACCTTGCAATAATTGC  
>HPV103\_Unclassified\_109390382\_nt6116\_L1\_Tile\_rc|1  
AATTATAGCTGGATCCATTACATGTATATGGGCTAATACATCAGCTGTGAGAGGAACCTT

>HPV103\_Unclassified\_109390382\_nt6121\_L1\_Tile\_rc|1  
TCCTCAATTATAGCTGGATCCATTACATGTATATGGGCTAATACATCAGCTGTGAGAGGA  
>HPV103\_Unclassified\_109390382\_nt6131\_L1\_Tile\_rc|1  
TAGCTGCCAGTCCTCAATTATAGCTGGATCCATTACATGTATATGGGCTAATACATCAGC  
>HPV103\_Unclassified\_109390382\_nt6136\_L1\_Tile\_rc|1  
AACCCTAGCTGCCAGTCCTCAATTATAGCTGGATCCATTACATGTATATGGGCTAATACA  
>HPV103\_Unclassified\_109390382\_nt6141\_L1\_Tile\_rc|1  
GTACAAACCCTAGCTGCCAGTCCTCAATTATAGCTGGATCCATTACATGTATATGGGCTA  
>HPV103\_Unclassified\_109390382\_nt6146\_L1\_Tile\_rc|1  
CGGTGGTACAAACCCTAGCTGCCAGTCCTCAATTATAGCTGGATCCATTACATGTATATG  
>HPV103\_Unclassified\_109390382\_nt6156\_L1\_Tile\_rc|1  
AAGAAGGAGGCGGTGGTACAAACCCTAGCTGCCAGTCCTCAATTATAGCTGGATCCATTA  
>HPV103\_Unclassified\_109390382\_nt6161\_L1\_Tile\_rc|1  
AATAGAAGAAGGAGGCGGTGGTACAAACCCTAGCTGCCAGTCCTCAATTATAGCTGGATC  
>HPV103\_Unclassified\_109390382\_nt6166\_L1\_Tile\_rc|1  
TCTCCAATAGAAGAAGGAGGCGGTGGTACAAACCCTAGCTGCCAGTCCTCAATTATAGCT  
>HPV103\_Unclassified\_109390382\_nt6171\_L1\_Tile\_rc|1  
ATGTATCTCCAATAGAAGAAGGAGGCGGTGGTACAAACCCTAGCTGCCAGTCCTCAATTA  
>HPV103\_Unclassified\_109390382\_nt6176\_L1\_Tile\_rc|1  
TCTGTATGTATCTCCAATAGAAGAAGGAGGCGGTGGTACAAACCCTAGCTGCCAGTCCTC  
>HPV103\_Unclassified\_109390382\_nt6181\_L1\_Tile\_rc|1  
AAAAATCTGTATGTATCTCCAATAGAAGAAGGAGGCGGTGGTACAAACCCTAGCTGCCAG  
>HPV103\_Unclassified\_109390382\_nt6186\_L1\_Tile\_rc|1  
ATGTTAAAAATCTGTATGTATCTCCAATAGAAGAAGGAGGCGGTGGTACAAACCCTAGCT  
>HPV103\_Unclassified\_109390382\_nt6201\_L1\_Tile\_rc|1  
AGCGTGTGGCTAAAGATGTTAAAAATCTGTATGTATCTCCAATAGAAGAAGGAGGCGGTG  
>HPV103\_Unclassified\_109390382\_nt6211\_L1\_Tile\_rc|1  
GCAGCAGGGCAGCGTGTGGCTAAAGATGTTAAAAATCTGTATGTATCTCCAATAGAAGAA  
>HPV103\_Unclassified\_109390382\_nt6216\_L1\_Tile\_rc|1  
GTTCTGCAGCAGGGCAGCGTGTGGCTAAAGATGTTAAAAATCTGTATGTATCTCCAATAG  
>HPV103\_Unclassified\_109390382\_nt6226\_L1\_Tile\_rc|1  
TCCTTGGGAGGTTCTGCAGCAGGGCAGCGTGTGGCTAAAGATGTTAAAAATCTGTATGTA  
>HPV103\_Unclassified\_109390382\_nt6241\_L1\_Tile\_rc|1  
TATGGGTCTGTTTTCTTGGGAGGTTCTGCAGCAGGGCAGCGTGTGGCTAAAGATGTT  
>HPV103\_Unclassified\_109390382\_nt6246\_L1\_Tile\_rc|1  
TATCATATGGGTCTGTTTTCTTGGGAGGTTCTGCAGCAGGGCAGCGTGTGGCTAAAG  
>HPV103\_Unclassified\_109390382\_nt6346\_L1\_Tile\_rc|1  
GAGCTAACCCAGTTTGAGATAAAAAATCTGCGACCCAAAGGATATCTGTCAAGATCAGAG  
>HPV103\_Unclassified\_109390382\_nt6351\_L1\_Tile\_rc|1  
AAGACGAGCTAACCCAGTTTGAGATAAAAAATCTGCGACCCAAAGGATATCTGTCAAGAT  
>HPV103\_Unclassified\_109390382\_nt6356\_L1\_Tile\_rc|1  
GGTAGAAGACGAGCTAACCCAGTTTGAGATAAAAAATCTGCGACCCAAAGGATATCTGTC  
>HPV103\_Unclassified\_109390382\_nt6361\_L1\_Tile\_rc|1  
GAGGAGGTAGAAGACGAGCTAACCCAGTTTGAGATAAAAAATCTGCGACCCAAAGGATAT  
>HPV103\_Unclassified\_109390382\_nt6366\_L1\_Tile\_rc|1  
TTCTAGAGGAGGTAGAAGACGAGCTAACCCAGTTTGAGATAAAAAATCTGCGACCCAAAG  
>HPV103\_Unclassified\_109390382\_nt6376\_L1\_Tile\_rc|1  
CGAGACCGCTTCTAGAGGAGGTAGAAGACGAGCTAACCCAGTTTGAGATAAAAAATCTG  
>HPV103\_Unclassified\_109390382\_nt6381\_L1\_Tile\_rc|1  
CTACACGAGACCGCTTCTAGAGGAGGTAGAAGACGAGCTAACCCAGTTTGAGATAAAA  
>HPV103\_Unclassified\_109390382\_nt6386\_L1\_Tile\_rc|1  
GGTCTCTACACGAGACCGCTTCTAGAGGAGGTAGAAGACGAGCTAACCCAGTTTGAGA  
>HPV103\_Unclassified\_109390382\_nt6391\_L1\_Tile\_rc|1  
GTAGGGGTCTCTACACGAGACCGCTTCTAGAGGAGGTAGAAGACGAGCTAACCCAGTT  
>HPV103\_Unclassified\_109390382\_nt6396\_L1\_Tile\_rc|1

GGCGGGTAGGGGTCTCTACACGAGACCGCTTTCTAGAGGAGGTAGAAGACGAGCTAACCC  
>HPV103\_Unclassified\_109390382\_nt6401\_L1\_Tile\_rc|1  
TACTGGGCGGGTAGGGGTCTCTACACGAGACCGCTTTCTAGAGGAGGTAGAAGACGAGCT  
>HPV103\_Unclassified\_109390382\_nt6406\_L1\_Tile\_rc|1  
GACCGTACTGGGCGGGTAGGGGTCTCTACACGAGACCGCTTTCTAGAGGAGGTAGAAGAC  
>HPV103\_Unclassified\_109390382\_nt6411\_L1\_Tile\_rc|1  
TAGCAGACCGTACTGGGCGGGTAGGGGTCTCTACACGAGACCGCTTTCTAGAGGAGGTAG  
>HPV103\_Unclassified\_109390382\_nt6416\_L1\_Tile\_rc|1  
TTTTTTTAGCAGACCGTACTGGGCGGGTAGGGGTCTCTACACGAGACCGCTTTCTAGAGGA  
>HPV103\_Unclassified\_109390382\_nt6421\_L1\_Tile\_rc|1  
CTACGTTTTTTTAGCAGACCGTACTGGGCGGGTAGGGGTCTCTACACGAGACCGCTTTCTA  
>HPV103\_Unclassified\_109390382\_nt6426\_L1\_Tile\_rc|1  
CCCGTCTACGTTTTTTTAGCAGACCGTACTGGGCGGGTAGGGGTCTCTACACGAGACCGCT  
>HPV103\_Unclassified\_109390382\_nt6431\_L1\_Tile\_rc|1  
AACCCCCCTCTACGTTTTTTTAGCAGACCGTACTGGGCGGGTAGGGGTCTCTACACGAGA  
>HPV103\_Unclassified\_109390382\_nt6434\_L1\_Tile\_rc|1  
TTAAACCCCCCTCTACGTTTTTTTAGCAGACCGTACTGGGCGGGTAGGGGTCTCTACACG  
>HPV106\_Alpha\_71726710\_nt5675\_L1\_Tile\_rc|1  
ATGAGGGCAATAAATAATATGTAGACCCGTGCACAAGCACATCGCCTGTGGGGTGACCAG  
>HPV106\_Alpha\_71726710\_nt5685\_L1\_Tile\_rc|1  
AGCAACACATATGAGGGCAATAAATAATATGTAGACCCGTGCACAAGCACATCGCCTGTG  
>HPV106\_Alpha\_71726710\_nt5895\_L1\_Tile\_rc|1  
GTCCACTTTGCTTTTTGATAGGATAATATGGATGACCTACGGTCAGCAATCGGGAACCTGC  
>HPV106\_Alpha\_71726710\_nt5900\_L1\_Tile\_rc|1  
GTTCCGTCCACTTTGCTTTTTGATAGGATAATATGGATGACCTACGGTCAGCAATCGGGA  
>HPV106\_Alpha\_71726710\_nt5905\_L1\_Tile\_rc|1  
ATAGGGTTCCGTCCACTTTGCTTTTTGATAGGATAATATGGATGACCTACGGTCAGCAAT  
>HPV106\_Alpha\_71726710\_nt6270\_L1\_Tile\_rc|1  
CAGTGACATTGGAGGTATTGCATGGAGTGCCTTTTGCCAGTGTTCCGCCAATGGCGGTT  
>HPV106\_Alpha\_71726710\_nt6275\_L1\_Tile\_rc|1  
CCCTGCAGTGACATTGGAGGTATTGCATGGAGTGCCTTTTGCCAGTGTTCCGCCAATGG  
>HPV106\_Alpha\_71726710\_nt6555\_L1\_Tile\_rc|1  
GTAAAAACCTTCCGGAACATCCTCCCCCATGGTACCGGCCCTGTTGTAAAAATGCCTAA  
>HPV106\_Alpha\_71726710\_nt6560\_L1\_Tile\_rc|1  
CTTTAGTAAAAACCTTCCGGAACATCCTCCCCCATGGTACCGGCCCTGTTGTAAAAATG  
>HPV106\_Alpha\_71726710\_nt6565\_L1\_Tile\_rc|1  
GGCCCCCTTTAGTAAAAACCTTCCGGAACATCCTCCCCCATGGTACCGGCCCTGTTGTAA  
>HPV106\_Alpha\_71726710\_nt6570\_L1\_Tile\_rc|1  
TAGTAGGCCCTTTAGTAAAAACCTTCCGGAACATCCTCCCCCATGGTACCGGCCCTGT  
>HPV106\_Alpha\_71726710\_nt6575\_L1\_Tile\_rc|1  
TGTAGTAGTAGGCCCTTTAGTAAAAACCTTCCGGAACATCCTCCCCCATGGTACCGGC  
>HPV106\_Alpha\_71726710\_nt6580\_L1\_Tile\_rc|1  
CGGGATGTAGTAGTAGGCCCTTTAGTAAAAACCTTCCGGAACATCCTCCCCCATGGTA  
>HPV106\_Alpha\_71726710\_nt6590\_L1\_Tile\_rc|1  
AGCAGAGGCGCGGATGTAGTAGTAGGCCCTTTAGTAAAAACCTTCCGGAACATCCTC  
>HPV106\_Alpha\_71726710\_nt6595\_L1\_Tile\_rc|1  
CTTGTAGCAGAGGCGCGGATGTAGTAGTAGGCCCTTTAGTAAAAACCTTCCGGAACA  
>HPV106\_Alpha\_71726710\_nt6605\_L1\_Tile\_rc|1  
ATATAGTGAGCTTGTAGCAGAGGCGCGGATGTAGTAGTAGGCCCTTTAGTAAAAACCC  
>HPV106\_Alpha\_71726710\_nt6610\_L1\_Tile\_rc|1  
GACCCATATAGTGAGCTTGTAGCAGAGGCGCGGATGTAGTAGTAGGCCCTTTAGTAAA  
>HPV106\_Alpha\_71726710\_nt6995\_L1\_Tile\_rc|1  
CTGTAAAAACCTATAGGTATCGCCAAGACTGGCGGTAGGGGGGGGCAACGACCCAAAATT  
>HPV106\_Alpha\_71726710\_nt7070\_L1\_Tile\_rc|1  
AAACGTAAAGCCCATCGTAAGGGTCCTTTTTCTTTGCAGGCGCCGCGGAGGGCTTTTGACA

>HPV106\_Alpha\_71726710\_nt7130\_L1\_Tile\_rc|1  
CCTACCCAAGGGAACTGGTCAAGCTCAAGGGAAAAGCGCTCTGATAAATCCACATCCCA  
>HPV106\_Alpha\_71726710\_nt7240\_L1\_Tile\_rc|1  
GAACGCTTGGACCGTTTACGCTTTGTGGCTGGTGGGGTGGACGATGGTGCAGGACGCTTA  
>HPV107\_Beta\_126131393\_nt5829\_L1\_Tile\_rc|1  
TATTGGTCCGCTCCACGTACTCATCGGTACTTAGCACCCGTGCCACCGGAGTTGATGGTG  
>HPV107\_Beta\_126131393\_nt5834\_L1\_Tile\_rc|1  
AAATATATTGGTCCGCTCCACGTACTCATCGGTACTTAGCACCCGTGCCACCGGAGTTGA  
>HPV107\_Beta\_126131393\_nt5839\_L1\_Tile\_rc|1  
TGATAAAATATATTGGTCCGCTCCACGTACTCATCGGTACTTAGCACCCGTGCCACCGGA  
>HPV107\_Beta\_126131393\_nt5849\_L1\_Tile\_rc|1  
ACTAGTGGCGTGATAAAATATATTGGTCCGCTCCACGTACTCATCGGTACTTAGCACCCG  
>HPV107\_Beta\_126131393\_nt5854\_L1\_Tile\_rc|1  
CTGTCACTAGTGGCGTGATAAAATATATTGGTCCGCTCCACGTACTCATCGGTACTTAGC  
>HPV107\_Beta\_126131393\_nt5859\_L1\_Tile\_rc|1  
ATAATCTGTCACTAGTGGCGTGATAAAATATATTGGTCCGCTCCACGTACTCATCGGTAC  
>HPV107\_Beta\_126131393\_nt5864\_L1\_Tile\_rc|1  
TGTTAATAATCTGTCACTAGTGGCGTGATAAAATATATTGGTCCGCTCCACGTACTCATC  
>HPV107\_Beta\_126131393\_nt6154\_L1\_Tile\_rc|1  
TCTGTTGAAGTGTGTTTGTAGCTATTTGTATTTTCAGTGTCTTTACCTTATTGAACAAA  
>HPV107\_Beta\_126131393\_nt6159\_L1\_Tile\_rc|1  
TATCATCTGTTGAAGTGTGTTTGTAGCTATTTGTATTTTCAGTGTCTTTACCTTATTGA  
>HPV107\_Beta\_126131393\_nt6164\_L1\_Tile\_rc|1  
TTGTCTATCATCTGTTGAAGTGTGTTTGTAGCTATTTGTATTTTCAGTGTCTTTACCTT  
>HPV107\_Beta\_126131393\_nt6274\_L1\_Tile\_rc|1  
TGTTGGTCACCAGCATCATCGCATGGCAGTGCCCTATCCCAATATTCCCCTAAACATGGT  
>HPV107\_Beta\_126131393\_nt6284\_L1\_Tile\_rc|1  
ACATTTACCTTGTTGGTCACCAGCATCATCGCATGGCAGTGCCCTATCCCAATATTCCCC  
>HPV107\_Beta\_126131393\_nt6294\_L1\_Tile\_rc|1  
CAATGGGCGGACATTTACCTTGTTGGTCACCAGCATCATCGCATGGCAGTGCCCTATCCC  
>HPV107\_Beta\_126131393\_nt6299\_L1\_Tile\_rc|1  
TAATTC AATGGGCGGACATTTACCTTGTTGGTCACCAGCATCATCGCATGGCAGTGCCCT  
>HPV107\_Beta\_126131393\_nt6304\_L1\_Tile\_rc|1  
TTTTTTAATTC AATGGGCGGACATTTACCTTGTTGGTCACCAGCATCATCGCATGGCAGT  
>HPV107\_Beta\_126131393\_nt6314\_L1\_Tile\_rc|1  
TATAAAAGAATTTTTTAATTC AATGGGCGGACATTTACCTTGTTGGTCACCAGCATCATC  
>HPV107\_Beta\_126131393\_nt6319\_L1\_Tile\_rc|1  
TCTTCTATAAAAGAATTTTTTAATTC AATGGGCGGACATTTACCTTGTTGGTCACCAGCA  
>HPV107\_Beta\_126131393\_nt6364\_L1\_Tile\_rc|1  
GTCTTGTTATTTATATTGCCAAACCCAATATCTATCATATCCCCATCTTCTATAAAAGAA  
>HPV107\_Beta\_126131393\_nt6374\_L1\_Tile\_rc|1  
TACTGATAATGTCCTTGTTATTTATATTGCCAAACCCAATATCTATCATATCCCCATCTTC  
>HPV107\_Beta\_126131393\_nt6379\_L1\_Tile\_rc|1  
TTGTTTACTGATAATGTCTTGTTATTTATATTGCCAAACCCAATATCTATCATATCCCCA  
>HPV107\_Beta\_126131393\_nt6384\_L1\_Tile\_rc|1  
CTGATTTGTTTACTGATAATGTCTTGTTATTTATATTGCCAAACCCAATATCTATCATAT  
>HPV107\_Beta\_126131393\_nt6389\_L1\_Tile\_rc|1  
AACATCTGATTTGTTTACTGATAATGTCTTGTTATTTATATTGCCAAACCCAATATCTAT  
>HPV107\_Beta\_126131393\_nt6394\_L1\_Tile\_rc|1  
AAACTAACATCTGATTTGTTTACTGATAATGTCTTGTTATTTATATTGCCAAACCCAATA  
>HPV107\_Beta\_126131393\_nt6399\_L1\_Tile\_rc|1  
AATCTAAACTAACATCTGATTTGTTTACTGATAATGTCTTGTTATTTATATTGCCAAACC  
>HPV107\_Beta\_126131393\_nt6404\_L1\_Tile\_rc|1  
TACTAAATCTAAACTAACATCTGATTTGTTTACTGATAATGTCTTGTTATTTATATTGCC  
>HPV107\_Beta\_126131393\_nt6409\_L1\_Tile\_rc|1

TCATTTACTAAATCTAAACTAACATCTGATTTGTTTACTGATAATGTCTTGTTATTTATA  
>HPV107\_Beta\_126131393\_nt6559\_L1\_Tile\_rc|1  
TTAGTTGTTGTATCAGGTATAGCATCACCCACAGCTCCTCCTCTAGTGAAATAATGTCTA  
>HPV107\_Beta\_126131393\_nt6564\_L1\_Tile\_rc|1  
CTTGATTAGTTGTTGTATCAGGTATAGCATCACCCACAGCTCCTCCTCTAGTGAAATAAT  
>HPV107\_Beta\_126131393\_nt6579\_L1\_Tile\_rc|1  
TATAGTATTTGTGATCTTGATTAGTTGTTGTATCAGGTATAGCATCACCCACAGCTCCTC  
>HPV107\_Beta\_126131393\_nt6584\_L1\_Tile\_rc|1  
TGCTATATAGTATTTGTGATCTTGATTAGTTGTTGTATCAGGTATAGCATCACCCACAGC  
>HPV107\_Beta\_126131393\_nt6589\_L1\_Tile\_rc|1  
TTAGGTGCTATATAGTATTTGTGATCTTGATTAGTTGTTGTATCAGGTATAGCATCACCC  
>HPV107\_Beta\_126131393\_nt6594\_L1\_Tile\_rc|1  
CACTCTTAGGTGCTATATAGTATTTGTGATCTTGATTAGTTGTTGTATCAGGTATAGCAT  
>HPV107\_Beta\_126131393\_nt6599\_L1\_Tile\_rc|1  
TTGTCCACTCTTAGGTGCTATATAGTATTTGTGATCTTGATTAGTTGTTGTATCAGGTAT  
>HPV107\_Beta\_126131393\_nt6609\_L1\_Tile\_rc|1  
GACTTTGGGATTGTCCACTCTTAGGTGCTATATAGTATTTGTGATCTTGATTAGTTGTTG  
>HPV107\_Beta\_126131393\_nt6614\_L1\_Tile\_rc|1  
CAAAGGACTTTGGGATTGTCCACTCTTAGGTGCTATATAGTATTTGTGATCTTGATTAGT  
>HPV107\_Beta\_126131393\_nt6624\_L1\_Tile\_rc|1  
TAGAATTACCCAAAGGACTTTGGGATTGTCCACTCTTAGGTGCTATATAGTATTTGTGAT  
>HPV107\_Beta\_126131393\_nt6629\_L1\_Tile\_rc|1  
GTAAATAGAATTACCCAAAGGACTTTGGGATTGTCCACTCTTAGGTGCTATATAGTATTT  
>HPV107\_Beta\_126131393\_nt6634\_L1\_Tile\_rc|1  
GGATAGTAAATAGAATTACCCAAAGGACTTTGGGATTGTCCACTCTTAGGTGCTATATAG  
>HPV107\_Beta\_126131393\_nt6639\_L1\_Tile\_rc|1  
CGGTGGGATAGTAAATAGAATTACCCAAAGGACTTTGGGATTGTCCACTCTTAGGTGCTA  
>HPV107\_Beta\_126131393\_nt6654\_L1\_Tile\_rc|1  
CTAAGGAGCCACTAACGGTGGGATAGTAAATAGAATTACCCAAAGGACTTTGGGATTGTC  
>HPV107\_Beta\_126131393\_nt6659\_L1\_Tile\_rc|1  
AGAACTAAGGAGCCACTAACGGTGGGATAGTAAATAGAATTACCCAAAGGACTTTGGGA  
>HPV107\_Beta\_126131393\_nt6664\_L1\_Tile\_rc|1  
TCAGAAGAACTAAGGAGCCACTAACGGTGGGATAGTAAATAGAATTACCCAAAGGACTT  
>HPV107\_Beta\_126131393\_nt6669\_L1\_Tile\_rc|1  
GTGCATCAGAAGAACTAAGGAGCCACTAACGGTGGGATAGTAAATAGAATTACCCAAAG  
>HPV107\_Beta\_126131393\_nt6699\_L1\_Tile\_rc|1  
GTTTCAACCAGAAGGTCTGTTAAAGAGCTGTGCATCAGAAGAACTAAGGAGCCACTAA  
>HPV107\_Beta\_126131393\_nt6809\_L1\_Tile\_rc|1  
TCCATTTTGACTAGGCACACTTATAGTAAAATTGGTGTTCCTTGATTGTCTGCAACAGT  
>HPV107\_Beta\_126131393\_nt6839\_L1\_Tile\_rc|1  
GATATTATTGGCATCATATTCTGTAAGGGGTCCATTTTGACTAGGCACACTTATAGTAAA  
>HPV107\_Beta\_126131393\_nt6844\_L1\_Tile\_rc|1  
TCCCTGATATTATTGGCATCATATTCTGTAAGGGGTCCATTTTGACTAGGCACACTTATA  
>HPV107\_Beta\_126131393\_nt6849\_L1\_Tile\_rc|1  
AAAATTCCCTGATATTATTGGCATCATATTCTGTAAGGGGTCCATTTTGACTAGGCACAC  
>HPV107\_Beta\_126131393\_nt6854\_L1\_Tile\_rc|1  
CCTTAAAAATTCCCTGATATTATTGGCATCATATTCTGTAAGGGGTCCATTTTGACTAGG  
>HPV107\_Beta\_126131393\_nt6879\_L1\_Tile\_rc|1  
CAGATATTTGATATTCCTCAACATGCCTTAAAAATTCCCTGATATTATTGGCATCATATT  
>HPV107\_Beta\_126131393\_nt6884\_L1\_Tile\_rc|1  
TATTACAGATATTTGATATTCCTCAACATGCCTTAAAAATTCCCTGATATTATTGGCATC  
>HPV107\_Beta\_126131393\_nt6909\_L1\_Tile\_rc|1  
GTAAAGACACTTTACAAAGTTGCAGTATTACAGATATTTGATATTCCTCAACATGCCTTA  
>HPV107\_Beta\_126131393\_nt6914\_L1\_Tile\_rc|1  
TGGTTGTAAAGACACTTTACAAAGTTGCAGTATTACAGATATTTGATATTCCTCAACATG



>HPV107\_Beta\_126131393\_nt6919\_L1\_Tile\_rc|1  
ACATCTGGTTGTAAAGACACTTTACAAAGTTGCAGTATTACAGATATTTGATATTCCTCA  
>HPV107\_Beta\_126131393\_nt6934\_L1\_Tile\_rc|1  
TTAATTTGGGCTAACACATCTGGTTGTAAAGACACTTTACAAAGTTGCAGTATTACAGAT  
>HPV107\_Beta\_126131393\_nt6939\_L1\_Tile\_rc|1  
TAGCATTAATTTGGGCTAACACATCTGGTTGTAAAGACACTTTACAAAGTTGCAGTATTA  
>HPV107\_Beta\_126131393\_nt6944\_L1\_Tile\_rc|1  
ATTCATAGCATTAATTTGGGCTAACACATCTGGTTGTAAAGACACTTTACAAAGTTGCAG  
>HPV107\_Beta\_126131393\_nt6954\_L1\_Tile\_rc|1  
AAATGCCTGAATTCATAGCATTAATTTGGGCTAACACATCTGGTTGTAAAGACACTTTAC  
>HPV107\_Beta\_126131393\_nt6959\_L1\_Tile\_rc|1  
TTCCAAAATGCCTGAATTCATAGCATTAATTTGGGCTAACACATCTGGTTGTAAAGACAC  
>HPV107\_Beta\_126131393\_nt7124\_L1\_Tile\_rc|1  
TAATTTTTCTGTCATATCAACTCTCCAGAAAAAGTATTGAGCAAAAGGATCTTCCTTTTC  
>HPV107\_Beta\_126131393\_nt7184\_L1\_Tile\_rc|1  
AGGTAGTGTGTTTGGGAATAGGAATTTACGTCCTAAAGGATACTGATCTAAATCCAAAGA  
>HPV107\_Beta\_126131393\_nt7194\_L1\_Tile\_rc|1  
TTCGAGAGGCAGGTAGTGTGTTTGGGAATAGGAATTTACGTCCTAAAGGATACTGATCTA  
>HPV107\_Beta\_126131393\_nt7199\_L1\_Tile\_rc|1  
ACGTTTTTCGAGAGGCAGGTAGTGTGTTTGGGAATAGGAATTTACGTCCTAAAGGATACTG  
>HPV107\_Beta\_126131393\_nt7209\_L1\_Tile\_rc|1  
TCGGCGCTGCACGTTTTTCGAGAGGCAGGTAGTGTGTTTGGGAATAGGAATTTACGTCCTA  
>HPV107\_Beta\_126131393\_nt7219\_L1\_Tile\_rc|1  
GATTTGGTGGTCGGCGCTGCACGTTTTTCGAGAGGCAGGTAGTGTGTTTGGGAATAGGAAT  
>HPV107\_Beta\_126131393\_nt7224\_L1\_Tile\_rc|1  
CAACCGATTTGGTGGTCGGCGCTGCACGTTTTTCGAGAGGCAGGTAGTGTGTTTGGGAATA  
>HPV107\_Beta\_126131393\_nt7253\_L1\_Tile\_rc|1  
TCAAGTACGTTTTCGTTTTGCTATGCTTTGCAACCGATTTGGTGGTCGGCGCTGCACGTTT  
>HPV11\_Alpha\_333026\_nt5892\_L1\_Tile\_rc|1  
TGGTACAACGTTTTTGTAACTTTTTTGATAGAGTAATATGGATGTCCACAGCAAGGAG  
>HPV11\_Alpha\_333026\_nt5897\_L1\_Tile\_rc|1  
ACCTTTGGTACAACGTTTTTGTAACTTTTTTGATAGAGTAATATGGATGTCCACAGCA  
>HPV11\_Alpha\_333026\_nt5902\_L1\_Tile\_rc|2  
CAGACACCTTTGGTACAACGTTTTTGTAACTTTTTTGATAGAGTAATATGGATGTCCCA  
>HPV11\_Alpha\_333026\_nt6002\_L1\_Tile\_rc|2  
CATACTAAACGCTGTGTAGTGGGGTCAAACAGGGATGAATCAGGTAATGCAAACCTTGTTA  
>HPV11\_Alpha\_333026\_nt6117\_L1\_Tile\_rc|1  
ATTACCACCATACCCACCACTATTTTCTACATCATATTTGTTTAGCAATGGATGCCC  
>HPV11\_Alpha\_333026\_nt6272\_L1\_Tile\_rc|1  
AGTTCCAACGGGGGGCAGTCACCATTTTGTACAGAGGTATTTGAACATTGTGTACCCTTA  
>HPV11\_Alpha\_333026\_nt6277\_L1\_Tile\_rc|1  
TAATAAGTTCCAACGGGGGGCAGTCACCATTTTGTACAGAGGTATTTGAACATTGTGTAC  
>HPV11\_Alpha\_333026\_nt6392\_L1\_Tile\_rc|1  
TTGCAGACAGTTCCACAAATATCAAGGGGAACATCCGATTTATTGGTTTGTAAGTCTGCA  
>HPV11\_Alpha\_333026\_nt6547\_L1\_Tile\_rc|1  
TATTACCCCTTTTACCAACAGGTCATCAGGCACAGGTTCCCCACAGTACCGGCCCTAT  
>HPV11\_Alpha\_333026\_nt6557\_L1\_Tile\_rc|1  
GATGATCTGTTATTACCCCTTTTACCAACAGGTCATCAGGCACAGGTTCCCCACAGTA  
>HPV11\_Alpha\_333026\_nt6572\_L1\_Tile\_rc|1  
ATACTACTAGCTACAGATGATCTGTTATTACCCCTTTTACCAACAGGTCATCAGGCACA  
>HPV11\_Alpha\_333026\_nt6577\_L1\_Tile\_rc|1  
CATAAATACTACTAGCTACAGATGATCTGTTATTACCCCTTTTACCAACAGGTCATCAG  
>HPV11\_Alpha\_333026\_nt6582\_L1\_Tile\_rc|2  
ATGTACATAAATACTACTAGCTACAGATGATCTGTTATTACCCCTTTTACCAACAGGTC  
>HPV11\_Alpha\_333026\_nt6592\_L1\_Tile\_rc|1

CACTAGGTGTATGTACATAAATACTACTAGCTACAGATGATCTGTTATTACCCCTTTTA  
>HPV11\_Alpha\_333026\_nt6607\_L1\_Tile\_rc|1  
AAGACACCAATGAGCCACTAGGTGTATGTACATAAATACTACTAGCTACAGATGATCTGT  
>HPV11\_Alpha\_333026\_nt6622\_L1\_Tile\_rc|2  
ATAATTGAGCCTCTGAAGACACCAATGAGCCACTAGGTGTATGTACATAAATACTACTAG  
>HPV11\_Alpha\_333026\_nt6777\_L1\_Tile\_rc|1  
ATCTGAATTAGTGTATGTAGCAGATTTAGACACAGATGCACATAGTGTTCATATTTGTACT  
>HPV11\_Alpha\_333026\_nt6782\_L1\_Tile\_rc|2  
TTATAATCTGAATTAGTGTATGTAGCAGATTTAGACACAGATGCACATAGTGTTCATATTT  
>HPV11\_Alpha\_333026\_nt6787\_L1\_Tile\_rc|1  
ATTCTTATAATCTGAATTAGTGTATGTAGCAGATTTAGACACAGATGCACATAGTGTCA  
>HPV11\_Alpha\_333026\_nt6792\_L1\_Tile\_rc|1  
CATGTATTCCCTTATAATCTGAATTAGTGTATGTAGCAGATTTAGACACAGATGCACATAG  
>HPV11\_Alpha\_333026\_nt6797\_L1\_Tile\_rc|1  
TGGCGCATGTATTCCTTATAATCTGAATTAGTGTATGTAGCAGATTTAGACACAGATGCA  
>HPV11\_Alpha\_333026\_nt7142\_L1\_Tile\_rc|2  
CGAGCAGACGTCCTCGATATCCACTTTGCAATAAAAACTTACGTCCAAGGGGAAAC  
>HPV11\_Alpha\_333026\_nt7182\_L1\_Tile\_rc|2  
TGTAGAGGGCTTAGACACAGCTGGGCGCTTTATACCTGTACGAGCAGACGTCCTCG  
>HPV11\_Alpha\_333026\_nt7197\_L1\_Tile\_rc|1  
TTTTTCGTTTGGGGGCTGTAGAGGGCTTAGACACAGCTGGGCGCTTTATACCTGTACGAGC  
>HPV11\_Alpha\_333026\_nt7207\_L1\_Tile\_rc|1  
TTTTTGGTACGTTTTCGTTTGGGGGCTGTAGAGGGCTTAGACACAGCTGGGCGCTTTATAC  
>HPV110\_Beta\_186461194\_nt5847\_L1\_Tile\_rc|1  
TGCACCCGGAATGCTCTGTATTGATTTCTTGATACCTTAGGGACTTCTATTTTTGCGCCA  
>HPV110\_Beta\_186461194\_nt6062\_L1\_Tile\_rc|2  
ATGAAGTATTCTGCCTGTCATCAGTAGAGCCTGCTTGATAATTGCTAGAATTTTCAGTAT  
>HPV110\_Beta\_186461194\_nt6167\_L1\_Tile\_rc|1  
CTAACTGATTACCTGCTTCTGATTCACAAACAGGAGCTTTGTCCCAATGCTCTCCCATAC  
>HPV110\_Beta\_186461194\_nt6172\_L1\_Tile\_rc|1  
TAAACCTAACTGATTACCTGCTTCTGATTCACAAACAGGAGCTTTGTCCCAATGCTCTCC  
>HPV110\_Beta\_186461194\_nt6482\_L1\_Tile\_rc|2  
GCTTTGCTGGCAAGAAATAGTTATGATTTTGATTCACTGCACCATCAGGTATTGCATCCC  
>HPV110\_Beta\_186461194\_nt6487\_L1\_Tile\_rc|1  
ATCTTGCTTTGCTGGCAAGAAATAGTTATGATTTTGATTCACTGCACCATCAGGTATTGC  
>HPV110\_Beta\_186461194\_nt6507\_L1\_Tile\_rc|1  
GCTAGTGTGCGTTGTTGTTGATCTTGCTTTGCTGGCAAGAAATAGTTATGATTTTGATT  
>HPV110\_Beta\_186461194\_nt6512\_L1\_Tile\_rc|1  
AGTTTGCTAGTGTGCGTTGTTGTTGATCTTGCTTTGCTGGCAAGAAATAGTTATGATTTT  
>HPV110\_Beta\_186461194\_nt6517\_L1\_Tile\_rc|1  
TGTAGAGTTTGCTAGTGTGCGTTGTTGTTGATCTTGCTTTGCTGGCAAGAAATAGTTATG  
>HPV110\_Beta\_186461194\_nt6532\_L1\_Tile\_rc|1  
TACTGTTGGAAAATATGTAGAGTTTGCTAGTGTGCGTTGTTGTTGATCTTGCTTTGCTGG  
>HPV110\_Beta\_186461194\_nt6537\_L1\_Tile\_rc|1  
CCACTTACTGTTGGAAAATATGTAGAGTTTGCTAGTGTGCGTTGTTGTTGATCTTGCTTT  
>HPV110\_Beta\_186461194\_nt6557\_L1\_Tile\_rc|1  
CATCTGAAGTAACTAGAGAACCCTTACTGTTGGAAAATATGTAGAGTTTGCTAGTGTGC  
>HPV110\_Beta\_186461194\_nt6697\_L1\_Tile\_rc|1  
AGCTTCTGTAGTAACACTAATTGAAAAATTAGTATTACGAGTATTATCAGCAACAGTTAT  
>HPV110\_Beta\_186461194\_nt6702\_L1\_Tile\_rc|2  
GCTCCAGCTTCTGTAGTAACACTAATTGAAAAATTAGTATTACGAGTATTATCAGCAACA  
>HPV110\_Beta\_186461194\_nt6707\_L1\_Tile\_rc|1  
CAGTTGCTCCAGCTTCTGTAGTAACACTAATTGAAAAATTAGTATTACGAGTATTATCAG  
>HPV110\_Beta\_186461194\_nt6712\_L1\_Tile\_rc|1  
GTATTCAGTTGCTCCAGCTTCTGTAGTAACACTAATTGAAAAATTAGTATTACGAGTATT

>HPV110\_Beta\_186461194\_nt6717\_L1\_Tile\_rc|1  
GAATTGTATTTCAGTTGCTCCAGCTTCTGTAGTAACACTAATTGAAAAATTAGTATTACGA  
>HPV110\_Beta\_186461194\_nt6722\_L1\_Tile\_rc|2  
TTTGTGAATTGTATTTCAGTTGCTCCAGCTTCTGTAGTAACACTAATTGAAAAATTAGTAT  
>HPV110\_Beta\_186461194\_nt6727\_L1\_Tile\_rc|1  
TATATTTTGTGAATTGTATTTCAGTTGCTCCAGCTTCTGTAGTAACACTAATTGAAAAATT  
>HPV110\_Beta\_186461194\_nt6732\_L1\_Tile\_rc|1  
TCTCTTATATTTTGTGAATTGTATTTCAGTTGCTCCAGCTTCTGTAGTAACACTAATTGAA  
>HPV110\_Beta\_186461194\_nt6742\_L1\_Tile\_rc|2  
TCTAAGAAATTCTCTTATATTTTGTGAATTGTATTTCAGTTGCTCCAGCTTCTGTAGTAAC  
>HPV110\_Beta\_186461194\_nt6752\_L1\_Tile\_rc|1  
CCTCTACATGTCTAAGAAATTCTCTTATATTTTGTGAATTGTATTTCAGTTGCTCCAGCTT  
>HPV110\_Beta\_186461194\_nt6772\_L1\_Tile\_rc|1  
TATTAAAGAAAGTTGATATTCCTCTACATGTCTAAGAAATTCTCTTATATTTTGTGAATT  
>HPV110\_Beta\_186461194\_nt6777\_L1\_Tile\_rc|1  
TGCAGTATTAAAGAAAGTTGATATTCCTCTACATGTCTAAGAAATTCTCTTATATTTTGT  
>HPV110\_Beta\_186461194\_nt6782\_L1\_Tile\_rc|2  
ATAATTGCAGTATTAAAGAAAGTTGATATTCCTCTACATGTCTAAGAAATTCTCTTATAT  
>HPV110\_Beta\_186461194\_nt6792\_L1\_Tile\_rc|1  
GGTACCTTACATAATTGCAGTATTAAAGAAAGTTGATATTCCTCTACATGTCTAAGAAAT  
>HPV110\_Beta\_186461194\_nt6802\_L1\_Tile\_rc|2  
TGCTTTTAAAGGTACCTTACATAATTGCAGTATTAAAGAAAGTTGATATTCCTCTACATG  
>HPV110\_Beta\_186461194\_nt6807\_L1\_Tile\_rc|1  
ACCTCTGCTTTTAAAGGTACCTTACATAATTGCAGTATTAAAGAAAGTTGATATTCCTCT  
>HPV110\_Beta\_186461194\_nt6812\_L1\_Tile\_rc|1  
TTAAAACCTCTGCTTTTAAAGGTACCTTACATAATTGCAGTATTAAAGAAAGTTGATATT  
>HPV110\_Beta\_186461194\_nt6817\_L1\_Tile\_rc|1  
TTGTGTTAAACCTCTGCTTTTAAAGGTACCTTACATAATTGCAGTATTAAAGAAAGTTG  
>HPV110\_Beta\_186461194\_nt6822\_L1\_Tile\_rc|2  
TTAATTTGTGTTAAACCTCTGCTTTTAAAGGTACCTTACATAATTGCAGTATTAAAGAA  
>HPV110\_Beta\_186461194\_nt7107\_L1\_Tile\_rc|1  
ACCTTAACAGATGTCCTTACAGAGCGAGGTCGACTTTGTAAACCAGCCTGAAATAAAAAAT  
>HPV110\_Beta\_186461194\_nt7112\_L1\_Tile\_rc|1  
TAGAGACCTTAACAGATGTCCTTACAGAGCGAGGTCGACTTTGTAAACCAGCCTGAAATA  
>HPV110\_Beta\_186461194\_nt7117\_L1\_Tile\_rc|1  
ACCCTTAGAGACCTTAACAGATGTCCTTACAGAGCGAGGTCGACTTTGTAAACCAGCCTG  
>HPV110\_Beta\_186461194\_nt7127\_L1\_Tile\_rc|1  
TGCGTTTGGTACCCTTAGAGACCTTAACAGATGTCCTTACAGAGCGAGGTCGACTTTGTA  
>HPV110\_Beta\_186461194\_nt7137\_L1\_Tile\_rc|1  
CACGACCGTTTGCCTTGGTACCCTTAGAGACCTTAACAGATGTCCTTACAGAGCGAGGT  
>HPV110\_Beta\_186461194\_nt7138\_L1\_Tile\_rc|1  
TCACGACCGTTTGCCTTGGTACCCTTAGAGACCTTAACAGATGTCCTTACAGAGCGAGG  
>HPV111\_Beta\_186461202\_nt5988\_L1\_Tile\_rc|1  
TCTTGTGTCACAGCTTGATAATTACTGGAATTTTCAGTGTACGAACCTTATTAAATAAT  
>HPV111\_Beta\_186461202\_nt5993\_L1\_Tile\_rc|1  
TATCATCTTGTGTCACAGCTTGATAATTACTGGAATTTTCAGTGTACGAACCTTATTAA  
>HPV111\_Beta\_186461202\_nt6128\_L1\_Tile\_rc|1  
CAATTGGCGGGCATAAGCCTTGCTGGTTTCCTGCATCATCACAGGGTTTTGCTTTGTCCC  
>HPV111\_Beta\_186461202\_nt6133\_L1\_Tile\_rc|1  
TAATTCAATTGGCGGGCATAAGCCTTGCTGGTTTCCTGCATCATCACAGGGTTTTGCTTT  
>HPV111\_Beta\_186461202\_nt6138\_L1\_Tile\_rc|1  
TTCTTTAATTCAATTGGCGGGCATAAGCCTTGCTGGTTTCCTGCATCATCACAGGGTTTT  
>HPV111\_Beta\_186461202\_nt6148\_L1\_Tile\_rc|1  
TATTACAGAATTCCTTTAATTCAATTGGCGGGCATAAGCCTTGCTGGTTTCCTGCATCATC  
>HPV111\_Beta\_186461202\_nt6158\_L1\_Tile\_rc|1

CTCCATCCTCTATTACAGAATTCTTTAATTCAATTGGCGGGCATAAGCCTTGCTGGTTTC  
>HPV111\_Beta\_186461202\_nt6168\_L1\_Tile\_rc|1  
TCAAACATGTCTCCATCCTCTATTACAGAATTCTTTAATTCAATTGGCGGGCATAAGCCT  
>HPV111\_Beta\_186461202\_nt6288\_L1\_Tile\_rc|1  
TAGACGTCATTAGCCATAGTTAGGAAGTCAGGGTATTTACATACTTCATTGACAATATCT  
>HPV111\_Beta\_186461202\_nt6293\_L1\_Tile\_rc|1  
CCCCATAGACGTCATTAGCCATAGTTAGGAAGTCAGGGTATTTACATACTTCATTGACAA  
>HPV111\_Beta\_186461202\_nt6418\_L1\_Tile\_rc|1  
TGGCAGATAATAATTGTGATTTTGTGCTGCTGCATCTGGAATTGCATCTCCTACATT  
>HPV111\_Beta\_186461202\_nt6423\_L1\_Tile\_rc|1  
TGTGCTGGCAGATAATAATTGTGATTTTGTGCTGCTGCATCTGGAATTGCATCTCCT  
>HPV111\_Beta\_186461202\_nt6433\_L1\_Tile\_rc|1  
TTGATTACCCTGTGCTGGCAGATAATAATTGTGATTTTGTGCTGCTGCATCTGGAAT  
>HPV111\_Beta\_186461202\_nt6448\_L1\_Tile\_rc|1  
CAAAATGTTTGTGTTGATTACCCTGTGCTGGCAGATAATAATTGTGATTTTGTGCTGCTGCATCTGGAAT  
>HPV111\_Beta\_186461202\_nt6453\_L1\_Tile\_rc|1  
TTACCCAAAATGTTTGTGTTGATTACCCTGTGCTGGCAGATAATAATTGTGATTTTGT  
>HPV111\_Beta\_186461202\_nt6458\_L1\_Tile\_rc|1  
TGGAGTTACCCAAAATGTTTGTGTTGATTACCCTGTGCTGGCAGATAATAATTGTGAT  
>HPV111\_Beta\_186461202\_nt6463\_L1\_Tile\_rc|1  
ATAAATGGAGTTACCCAAAATGTTTGTGTTGATTACCCTGTGCTGGCAGATAATAATT  
>HPV111\_Beta\_186461202\_nt6468\_L1\_Tile\_rc|1  
GGATAATAAATGGAGTTACCCAAAATGTTTGTGTTGATTACCCTGTGCTGGCAGATAA  
>HPV111\_Beta\_186461202\_nt6478\_L1\_Tile\_rc|1  
ACTAACAGTAGGATAATAAATGGAGTTACCCAAAATGTTTGTGTTGATTACCCTGTGCT  
>HPV111\_Beta\_186461202\_nt6493\_L1\_Tile\_rc|1  
AGTAACAAGAGAACCCTAACAGTAGGATAATAAATGGAGTTACCCAAAATGTTTGTGTTG  
>HPV111\_Beta\_186461202\_nt6633\_L1\_Tile\_rc|1  
GTGGATACGCTTATAGTAAAATTAGTGTCTGCTGCTACTGTTATAAACATT  
>HPV111\_Beta\_186461202\_nt6638\_L1\_Tile\_rc|1  
CTTCTGTGGATACGCTTATAGTAAAATTAGTGTCTGCTGCTACTGTTATAA  
>HPV111\_Beta\_186461202\_nt6643\_L1\_Tile\_rc|1  
ATTAGCTTCTGTGGATACGCTTATAGTAAAATTAGTGTCTGCTGCTACTGTTATAA  
>HPV111\_Beta\_186461202\_nt6648\_L1\_Tile\_rc|1  
TGTGCATTAGCTTCTGTGGATACGCTTATAGTAAAATTAGTGTCTGCTGCTACTGTTATAA  
>HPV111\_Beta\_186461202\_nt6658\_L1\_Tile\_rc|1  
ATTATATTGCTGTGCATTAGCTTCTGTGGATACGCTTATAGTAAAATTAGTGTCTGCTGCT  
>HPV111\_Beta\_186461202\_nt6663\_L1\_Tile\_rc|1  
CTAGCATTATATTGCTGTGCATTAGCTTCTGTGGATACGCTTATAGTAAAATTAGTGTCT  
>HPV111\_Beta\_186461202\_nt6668\_L1\_Tile\_rc|1  
TATTACTAGCATTATATTGCTGTGCATTAGCTTCTGTGGATACGCTTATAGTAAAATTAG  
>HPV111\_Beta\_186461202\_nt6673\_L1\_Tile\_rc|1  
TCTAATATTACTAGCATTATATTGCTGTGCATTAGCTTCTGTGGATACGCTTATAGTAAA  
>HPV111\_Beta\_186461202\_nt6678\_L1\_Tile\_rc|1  
TATTCTCTAATATTACTAGCATTATATTGCTGTGCATTAGCTTCTGTGGATACGCTTATA  
>HPV111\_Beta\_186461202\_nt6748\_L1\_Tile\_rc|1  
TTCTGGAATAAAGAACTTTACATAGTTGAAGAATCAAAGACAATTGATATTCTTCTAC  
>HPV111\_Beta\_186461202\_nt6753\_L1\_Tile\_rc|1  
AAAACCTCTGGAATAAAGAACTTTACATAGTTGAAGAATCAAAGACAATTGATATTCT  
>HPV111\_Beta\_186461202\_nt6763\_L1\_Tile\_rc|1  
GATTTGAGATAAACTTCTGGAATAAAGAACTTTACATAGTTGAAGAATCAAAGACAA  
>HPV111\_Beta\_186461202\_nt6768\_L1\_Tile\_rc|1  
GCATTGATTTGAGATAAACTTCTGGAATAAAGAACTTTACATAGTTGAAGAATCAA  
>HPV111\_Beta\_186461202\_nt7053\_L1\_Tile\_rc|1  
GATTTACACAGACGAAGTTTTAAAGTCCGTTTTCTGTTTGTAAACCAGCCTGGAATAAA

>HPV111\_Beta\_186461202\_nt7058\_L1\_Tile\_rc|1  
TAGTAGATTTACAGACGAAGGTTTTAAAGTCCGTTTTTCGTGTTTGTAACCAGCCTGGA  
>HPV111\_Beta\_186461202\_nt7063\_L1\_Tile\_rc|1  
AGATTTAGTAGATTTACAGACGAAGGTTTTAAAGTCCGTTTTTCGTGTTTGTAACCAGC  
>HPV111\_Beta\_186461202\_nt7068\_L1\_Tile\_rc|1  
TTTGCAGATTTAGTAGATTTACAGACGAAGGTTTTAAAGTCCGTTTTTCGTGTTTGTA  
>HPV111\_Beta\_186461202\_nt7083\_L1\_Tile\_rc|1  
TAGGTGCGTCTGCGTTTTGCAGATTTAGTAGATTTACAGACGAAGGTTTTAAAGTCCGT  
>HPV111\_Beta\_186461202\_nt7084\_L1\_Tile\_rc|1  
TTAGGTGCGTCTGCGTTTTGCAGATTTAGTAGATTTACAGACGAAGGTTTTAAAGTCCG  
>HPV12\_Beta\_396910\_nt6165\_L1\_Tile\_rc|1  
ATTTTGTTAAAAATAGGGATGTCCAGTACTTCCAACGCCTAAAGGCTGACCCCTACTTATT  
>HPV12\_Beta\_396910\_nt6205\_L1\_Tile\_rc|1  
ACTGCCTGTGGCATAGTTATTTGAGTTTTCCGTGTCTTTAATTTTGTTAAAAATAGGGATG  
>HPV12\_Beta\_396910\_nt6220\_L1\_Tile\_rc|1  
CTGTCTATCATCCTTACTGCCTGTGGCATAGTTATTTGAGTTTTCCGTGTCTTTAATTTT  
>HPV12\_Beta\_396910\_nt6235\_L1\_Tile\_rc|1  
ATCAAATGATGTGTTCTGTCTATCATCCTTACTGCCTGTGGCATAGTTATTTGAGTTTTT  
>HPV12\_Beta\_396910\_nt6330\_L1\_Tile\_rc|1  
TTTTTCAGCTGGTGCATCCCCGCAGGGTAAGGCTTTCTCCAGTGTTCTCCCACACAAGGT  
>HPV12\_Beta\_396910\_nt6335\_L1\_Tile\_rc|1  
CACCATTTTCAGCTGGTGCATCCCCGCAGGGTAAGGCTTTCTCCAGTGTTCTCCCACAC  
>HPV12\_Beta\_396910\_nt6340\_L1\_Tile\_rc|1  
GCAAACACCATTTTCAGCTGGTGCATCCCCGCAGGGTAAGGCTTTCTCCAGTGTTCTCC  
>HPV12\_Beta\_396910\_nt6350\_L1\_Tile\_rc|1  
CTATGGGAGGGCAAACACCATTTTCAGCTGGTGCATCCCCGCAGGGTAAGGCTTTCTCCC  
>HPV12\_Beta\_396910\_nt6355\_L1\_Tile\_rc|1  
TAACTCTATGGGAGGGCAAACACCATTTTCAGCTGGTGCATCCCCGCAGGGTAAGGCTTT  
>HPV12\_Beta\_396910\_nt6375\_L1\_Tile\_rc|1  
TCTTCAATGAAAGTGTTCTTTAACTCTATGGGAGGGCAAACACCATTTTCAGCTGGTGCA  
>HPV12\_Beta\_396910\_nt6380\_L1\_Tile\_rc|1  
CACCATCTTCAATGAAAGTGTTCTTTAACTCTATGGGAGGGCAAACACCATTTTCAGCTG  
>HPV12\_Beta\_396910\_nt6895\_L1\_Tile\_rc|1  
ATTTGGAATGTCGTGTACATTTTGATTATCACTGTAAATAGATATACTGAAATTGGTGTT  
>HPV12\_Beta\_396910\_nt6900\_L1\_Tile\_rc|1  
TCATAATTTGGAATGTCGTGTACATTTTGATTATCACTGTAAATAGATATACTGAAATTG  
>HPV12\_Beta\_396910\_nt6905\_L1\_Tile\_rc|1  
GAGAATCATAATTTGGAATGTCGTGTACATTTTGATTATCACTGTAAATAGATATACTGA  
>HPV12\_Beta\_396910\_nt6910\_L1\_Tile\_rc|1  
TTTTTGAGAATCATAATTTGGAATGTCGTGTACATTTTGATTATCACTGTAAATAGATAT  
>HPV12\_Beta\_396910\_nt6915\_L1\_Tile\_rc|1  
CTAAATTTTGGAGAATCATAATTTGGAATGTCGTGTACATTTTGATTATCACTGTAAATA  
>HPV12\_Beta\_396910\_nt6920\_L1\_Tile\_rc|1  
ATTCTCTAAATTTTGGAGAATCATAATTTGGAATGTCGTGTACATTTTGATTATCACTGT  
>HPV12\_Beta\_396910\_nt6925\_L1\_Tile\_rc|1  
TAAATATTCTCTAAATTTTGGAGAATCATAATTTGGAATGTCGTGTACATTTTGATTATC  
>HPV12\_Beta\_396910\_nt7075\_L1\_Tile\_rc|1  
AATAGGATTGTCAGGAGTTGGCACGAAGCCTAATTGCCAGTCCTCCAGCAAAGAAGAGTT  
>HPV12\_Beta\_396910\_nt7100\_L1\_Tile\_rc|1  
ATTCGATATATCTGTATGTGTCATGAATAGGATTGTCAGGAGTTGGCACGAAGCCTAATT  
>HPV12\_Beta\_396910\_nt7105\_L1\_Tile\_rc|1  
CAGAGATTCGATATATCTGTATGTGTCATGAATAGGATTGTCAGGAGTTGGCACGAAGCC  
>HPV12\_Beta\_396910\_nt7200\_L1\_Tile\_rc|1  
GAAAGTCTCTCAGTCATATCTACAGTCCAAAACTTAAGCCATCATAAGGGTCCGGCTTT  
>HPV12\_Beta\_396910\_nt7205\_L1\_Tile\_rc|1

CTAAAGAAAGTCTCTCAGTCATATCTACAGTCCAAAACTTAAGCCATCATAAGGGTCCG  
>HPV12\_Beta\_396910\_nt7230\_L1\_Tile\_rc|1  
CGCCCTAAGGAATACTGATCCAGGTCTAAAGAAAGTCTCTCAGTCATATCTACAGTCCAA  
>HPV12\_Beta\_396910\_nt7260\_L1\_Tile\_rc|1  
TGTTGGAGGCCAGCCTGGAATAAGAACTTGCGCCCTAAGGAATACTGATCCAGGTCTAAA  
>HPV12\_Beta\_396910\_nt7325\_L1\_Tile\_rc|1  
TTCTTTTGGTCCCCCTTATGGAACCTTCTATAGCTTGATGATTTTGTGTACCGTTAACGG  
>HPV13\_Alpha\_85827580\_nt5873\_L1\_Tile\_rc|1  
CAGATACCTTAGGGACAACAGTTTTGTTTTGTTTCTTAATAGGAAAATAAGGATTTCCCA  
>HPV13\_Alpha\_85827580\_nt5878\_L1\_Tile\_rc|1  
ATAACCAGATACCTTAGGGACAACAGTTTTGTTTTGTTTCTTAATAGGAAAATAAGGATT  
>HPV13\_Alpha\_85827580\_nt5883\_L1\_Tile\_rc|1  
AACTGATAACCAGATACCTTAGGGACAACAGTTTTGTTTTGTTTCTTAATAGGAAAATAA  
>HPV13\_Alpha\_85827580\_nt5888\_L1\_Tile\_rc|1  
CCCTAAACTGATAACCAGATACCTTAGGGACAACAGTTTTGTTTTGTTTCTTAATAGGAA  
>HPV13\_Alpha\_85827580\_nt5893\_L1\_Tile\_rc|1  
AAATACCTTAACTGATAACCAGATACCTTAGGGACAACAGTTTTGTTTTGTTTCTTAAT  
>HPV13\_Alpha\_85827580\_nt6253\_L1\_Tile\_rc|1  
ACTACTAATTAATCTAAAGGAGGGCAATCTCCAGGTTGTACATTTACACCAGTACATTG  
>HPV13\_Alpha\_85827580\_nt6503\_L1\_Tile\_rc|1  
CATATAATTCTGCTGGGATTAGTTCACCAACAGAGCCTGCCCTGTAAAGAAATGCCTTG  
>HPV13\_Alpha\_85827580\_nt6508\_L1\_Tile\_rc|1  
CTTAACATATAATTCTGCTGGGATTAGTTCACCAACAGAGCCTGCCCTGTAAAGAAATG  
>HPV13\_Alpha\_85827580\_nt6513\_L1\_Tile\_rc|1  
CTACCCTTAACATATAATTCTGCTGGGATTAGTTCACCAACAGAGCCTGCCCTGTAAAG  
>HPV13\_Alpha\_85827580\_nt6523\_L1\_Tile\_rc|1  
AAGTGTATTACTACCCTTAACATATAATTCTGCTGGGATTAGTTCACCAACAGAGCCTGC  
>HPV13\_Alpha\_85827580\_nt6528\_L1\_Tile\_rc|1  
TTAGAAAGTGTATTACTACCCTTAACATATAATTCTGCTGGGATTAGTTCACCAACAGAG  
>HPV13\_Alpha\_85827580\_nt6533\_L1\_Tile\_rc|1  
TACTATTAGAAAGTGTATTACTACCCTTAACATATAATTCTGCTGGGATTAGTTCACCAA  
>HPV13\_Alpha\_85827580\_nt6538\_L1\_Tile\_rc|1  
GTAAATACTATTAGAAAGTGTATTACTACCCTTAACATATAATTCTGCTGGGATTAGTTC  
>HPV13\_Alpha\_85827580\_nt6543\_L1\_Tile\_rc|1  
TTATAGTAAATACTATTAGAAAGTGTATTACTACCCTTAACATATAATTCTGCTGGGATT  
>HPV13\_Alpha\_85827580\_nt6548\_L1\_Tile\_rc|1  
GAGTATTATAGTAAATACTATTAGAAAGTGTATTACTACCCTTAACATATAATTCTGCTG  
>HPV13\_Alpha\_85827580\_nt6553\_L1\_Tile\_rc|1  
ACTGGGAGTATTATAGTAAATACTATTAGAAAGTGTATTACTACCCTTAACATATAATTC  
>HPV13\_Alpha\_85827580\_nt6558\_L1\_Tile\_rc|1  
GAGCCACTGGGAGTATTATAGTAAATACTATTAGAAAGTGTATTACTACCCTTAACATAT  
>HPV13\_Alpha\_85827580\_nt6563\_L1\_Tile\_rc|1  
CAAGAGAGCCACTGGGAGTATTATAGTAAATACTATTAGAAAGTGTATTACTACCCTTAA  
>HPV13\_Alpha\_85827580\_nt6743\_L1\_Tile\_rc|1  
CTGTGGCCTTATATGTGTCTGAAAGAGATGATGTAGTGGCTGCACACACAGTCATGTTAG  
>HPV13\_Alpha\_85827580\_nt6748\_L1\_Tile\_rc|1  
ATATTCTGTGGCCTTATATGTGTCTGAAAGAGATGATGTAGTGGCTGCACACACAGTCAT  
>HPV13\_Alpha\_85827580\_nt6753\_L1\_Tile\_rc|1  
TGTTTATATTCTGTGGCCTTATATGTGTCTGAAAGAGATGATGTAGTGGCTGCACACACA  
>HPV13\_Alpha\_85827580\_nt6763\_L1\_Tile\_rc|1  
TCGCATGTACTGTTTATATTCTGTGGCCTTATATGTGTCTGAAAGAGATGATGTAGTGGC  
>HPV13\_Alpha\_85827580\_nt6913\_L1\_Tile\_rc|1  
TTCCAATGTTCCATTAGGAGGGGAGATAGCCCAAAGTTCCAGTCTTCTAGAATTGTAGG  
>HPV13\_Alpha\_85827580\_nt6928\_L1\_Tile\_rc|1  
ATATCTATATGTGTCTTCCAATGTTCCATTAGGAGGGGAGATAGCCCAAAGTTCCAGTC

>HPV13\_Alpha\_85827580\_nt6933\_L1\_Tile\_rc|1  
TGTACATATCTATATGTGTCTTCCAATGTTCCATTAGGAGGGGGAGATAGCCCCAAAGTTC  
>HPV13\_Alpha\_85827580\_nt6938\_L1\_Tile\_rc|1  
GAGATTGTACATATCTATATGTGTCTTCCAATGTTCCATTAGGAGGGGGAGATAGCCCCAA  
>HPV13\_Alpha\_85827580\_nt6943\_L1\_Tile\_rc|1  
GGCCTGAGATTGTACATATCTATATGTGTCTTCCAATGTTCCATTAGGAGGGGGAGATAG  
>HPV13\_Alpha\_85827580\_nt6953\_L1\_Tile\_rc|1  
GACACGTTATGGCCTGAGATTGTACATATCTATATGTGTCTTCCAATGTTCCATTAGGAG  
>HPV13\_Alpha\_85827580\_nt7003\_L1\_Tile\_rc|1  
ACTAAGACCCGCATACGGATCCTGTTTTTCTTTATCAGGTGTAGGCTTTTGACACGTTAT  
>HPV13\_Alpha\_85827580\_nt7133\_L1\_Tile\_rc|1  
ATGCAGCACGTTTTCTACCTACACGAATAGGTGACCTAGACTGAACGCCTGTTTGTAAATA  
>HPV13\_Alpha\_85827580\_nt7138\_L1\_Tile\_rc|1  
TG TAGATGCAGCACGTTTTCTACCTACACGAATAGGTGACCTAGACTGAACGCCTGTTTG  
>HPV13\_Alpha\_85827580\_nt7143\_L1\_Tile\_rc|1  
GTAGATGTAGATGCAGCACGTTTTCTACCTACACGAATAGGTGACCTAGACTGAACGCCT  
>HPV13\_Alpha\_85827580\_nt7153\_L1\_Tile\_rc|1  
AGGTGTGGCAGTAGATGTAGATGCAGCACGTTTTCTACCTACACGAATAGGTGACCTAGA  
>HPV13\_Alpha\_85827580\_nt7163\_L1\_Tile\_rc|1  
TACGTGTAGTAGGTGTGGCAGTAGATGTAGATGCAGCACGTTTTCTACCTACACGAATAG  
>HPV13\_Alpha\_85827580\_nt7168\_L1\_Tile\_rc|1  
TTTTTTACGTGTAGTAGGTGTGGCAGTAGATGTAGATGCAGCACGTTTTCTACCTACACG  
>HPV13\_Alpha\_85827580\_nt7173\_L1\_Tile\_rc|1  
TTAGCTTTTTTTACGTGTAGTAGGTGTGGCAGTAGATGTAGATGCAGCACGTTTTCTACCT  
>HPV13\_Alpha\_85827580\_nt7178\_L1\_Tile\_rc|1  
TCCTTTTAGCTTTTTTTACGTGTAGTAGGTGTGGCAGTAGATGTAGATGCAGCACGTTTTTC  
>HPV13\_Alpha\_85827580\_nt7183\_L1\_Tile\_rc|1  
TTATTTTCCTTTTAGCTTTTTTTACGTGTAGTAGGTGTGGCAGTAGATGTAGATGCAGCACG  
>HPV14D\_Beta\_396918\_nt5969\_L1\_Tile\_rc|1  
GAGTTAGCTTGTTCCTGTATGAGTTGGGATTTTCTGTATCACCAACCTTATTAAATAAT  
>HPV14D\_Beta\_396918\_nt5974\_L1\_Tile\_rc|1  
CAGTGGAGTTAGCTTGTTCCTGTATGAGTTGGGATTTTCTGTATCACCAACCTTATTAA  
>HPV14D\_Beta\_396918\_nt5979\_L1\_Tile\_rc|1  
GTCATCAGTGGAGTTAGCTTGTTCCTGTATGAGTTGGGATTTTCTGTATCACCAACCTT  
>HPV14D\_Beta\_396918\_nt5984\_L1\_Tile\_rc|1  
TGTCTGTCATCAGTGGAGTTAGCTTGTTCCTGTATGAGTTGGGATTTTCTGTATCACCA  
>HPV14D\_Beta\_396918\_nt5989\_L1\_Tile\_rc|1  
CATTTTGTCTGTCATCAGTGGAGTTAGCTTGTTCCTGTATGAGTTGGGATTTTCTGTAT  
>HPV14D\_Beta\_396918\_nt5994\_L1\_Tile\_rc|1  
TGACACATTTTGTCTGTCATCAGTGGAGTTAGCTTGTTCCTGTATGAGTTGGGATTTTC  
>HPV14D\_Beta\_396918\_nt5999\_L1\_Tile\_rc|1  
TCAAATGACACATTTTGTCTGTCATCAGTGGAGTTAGCTTGTTCCTGTATGAGTTGGGA  
>HPV14D\_Beta\_396918\_nt6649\_L1\_Tile\_rc|1  
TGGATACCTCAGTGTTCCTGAACTAACTGATATACTAAAATTTGTGTTACGTGTGTTGT  
>HPV14D\_Beta\_396918\_nt6669\_L1\_Tile\_rc|1  
AGAGGTATAATTGTCAATTTTGGATACCTCAGTGTTCCTGAACTAACTGATATACTAAA  
>HPV14D\_Beta\_396918\_nt7099\_L1\_Tile\_rc|1  
AATTCTTGCCTTTTCGTTTAATACCCTTGATGGATCCCCTAGTCGAAACTGTTTTTGTAC  
>HPV14D\_Beta\_396918\_nt7101\_L1\_Tile\_rc|1  
CTAATTCTTGCCTTTTCGTTTAATACCCTTGATGGATCCCCTAGTCGAAACTGTTTTTGT  
>HPV15\_Beta\_396924\_nt6039\_L1\_Tile\_rc|1  
TTCTCTGTATCTTTTACTTTGTTGAATAAAGGATGGCCTGAAGTACCAACTCCTAATGGT  
>HPV15\_Beta\_396924\_nt6044\_L1\_Tile\_rc|1  
TGTTATTCTCTGTATCTTTTACTTTGTTGAATAAAGGATGGCCTGAAGTACCAACTCCTA  
>HPV15\_Beta\_396924\_nt6049\_L1\_Tile\_rc|1

ATTACTGTTATTCTCTGTATCTTTTACTTTGTTGAATAAAGGATGGCCTGAAGTACCAAC  
>HPV15\_Beta\_396924\_nt6059\_L1\_Tile\_rc|1  
TGCCTTGATAATTACTGTTATTCTCTGTATCTTTTACTTTGTTGAATAAAGGATGGCCTG  
>HPV15\_Beta\_396924\_nt6064\_L1\_Tile\_rc|1  
AGAGTTGCCCTTGATAATTACTGTTATTCTCTGTATCTTTTACTTTGTTGAATAAAGGATG  
>HPV15\_Beta\_396924\_nt6069\_L1\_Tile\_rc|1  
TCAGTAGAGTTGCCCTTGATAATTACTGTTATTCTCTGTATCTTTTACTTTGTTGAATAAA  
>HPV15\_Beta\_396924\_nt6314\_L1\_Tile\_rc|1  
CCAGACTCACATCTGACTTAGTAAGGCTTGTTATTAATGTTACCAAAACCTA  
>HPV15\_Beta\_396924\_nt6319\_L1\_Tile\_rc|1  
TATATCCAGACTCACATCTGACTTAGTAAGGCTTGTTATTAATGTTACCAAA  
>HPV15\_Beta\_396924\_nt6324\_L1\_Tile\_rc|1  
TTCATATATCCAGACTCACATCTGACTTAGTAAGGCTTGTTATTAATGTTA  
>HPV15\_Beta\_396924\_nt6549\_L1\_Tile\_rc|1  
AAGTAAGTAGAATTTGCTAAGTTATTTTGTGTTGGGTTGATTGTGCTGGTAAATAAAAA  
>HPV15\_Beta\_396924\_nt6554\_L1\_Tile\_rc|1  
TGGGAAAGTAAGTAGAATTTGCTAAGTTATTTGTTGTTGGGTTGATTGTGCTGGTAAAT  
>HPV15\_Beta\_396924\_nt6699\_L1\_Tile\_rc|1  
AAATTTGTATTCCCTTGTTGTTATCTGCAACAGTAATAAACATCTGATTACCCCAAAGTATG  
>HPV15\_Beta\_396924\_nt6709\_L1\_Tile\_rc|1  
ACTAATAGTAAAATTTGTATTCCCTGTGTTATCTGCAACAGTAATAAACATCTGATTACC  
>HPV15\_Beta\_396924\_nt6734\_L1\_Tile\_rc|1  
TTATGGCATTACCATCAGAGGTAACACTAATAGTAAAATTTGTATTCCCTGTGTTATCTG  
>HPV15\_Beta\_396924\_nt6744\_L1\_Tile\_rc|1  
TTATATTCAATTTATGGCATTACCATCAGAGGTAACACTAATAGTAAAATTTGTATTCCCT  
>HPV15\_Beta\_396924\_nt6759\_L1\_Tile\_rc|1  
CTGATATTTTGTGAATTATATTCAATTTATGGCATTACCATCAGAGGTAACACTAATAGTA  
>HPV16\_Alpha\_9627100\_nt6015\_L1\_Tile\_rc|1  
CATTCTCTATTATCCACACCTGCATTTGCTGCATAAGCACTAGCATTTTCTGTGTCATCC  
>HPV16\_Alpha\_9627100\_nt6020\_L1\_Tile\_rc|1  
ATATACATTCTCTATTATCCACACCTGCATTTGCTGCATAAGCACTAGCATTTTCTGTGT  
>HPV16\_Alpha\_9627100\_nt6025\_L1\_Tile\_rc|1  
CATAGATATACATTCTCTATTATCCACACCTGCATTTGCTGCATAAGCACTAGCATTTTC  
>HPV16\_Alpha\_9627100\_nt6035\_L1\_Tile\_rc|1  
GTTTGTAATCCATAGATATACATTCTCTATTATCCACACCTGCATTTGCTGCATAAGCAC  
>HPV16\_Alpha\_9627100\_nt6120\_L1\_Tile\_rc|1  
TTTACTGCAACATTGGTACATGGGGATCCTTTGCCCCAGTGTTCCCTTATAGGTGGTTTG  
>HPV16\_Alpha\_9627100\_nt6125\_L1\_Tile\_rc|1  
CTGGATTTACTGCAACATTGGTACATGGGGATCCTTTGCCCCAGTGTTCCCTTATAGGTG  
>HPV16\_Alpha\_9627100\_nt6155\_L1\_Tile\_rc|1  
TGTTTATTAACCTAATGGTGGACAATCACCTGGATTTACTGCAACATTGGTACATGGGG  
>HPV16\_Alpha\_9627100\_nt6160\_L1\_Tile\_rc|1  
AACTGTGTTTATTAACCTAATGGTGGACAATCACCTGGATTTACTGCAACATTGGTACA  
>HPV16\_Alpha\_9627100\_nt6420\_L1\_Tile\_rc|1  
CCAGAGCCTTTAATGTATAAATCGTCTGGTACATTTTCACCAACAGTACCAGCCCTATTA  
>HPV16\_Alpha\_9627100\_nt6425\_L1\_Tile\_rc|1  
TAGACCCAGAGCCTTTAATGTATAAATCGTCTGGTACATTTTCACCAACAGTACCAGCCC  
>HPV16\_Alpha\_9627100\_nt6440\_L1\_Tile\_rc|1  
TGGCTAAATTTGCAGTAGACCCAGAGCCTTTAATGTATAAATCGTCTGGTACATTTTCAC  
>HPV16\_Alpha\_9627100\_nt6445\_L1\_Tile\_rc|1  
TGAAGTGGCTAAATTTGCAGTAGACCCAGAGCCTTTAATGTATAAATCGTCTGGTACATT  
>HPV16\_Alpha\_9627100\_nt6450\_L1\_Tile\_rc|1  
TAATTTGAACTGGCTAAATTTGCAGTAGACCCAGAGCCTTTAATGTATAAATCGTCTGGT  
>HPV16\_Alpha\_9627100\_nt6455\_L1\_Tile\_rc|1  
GAAATAATTTGAACTGGCTAAATTTGCAGTAGACCCAGAGCCTTTAATGTATAAATCGT



>HPV16\_Alpha\_9627100\_nt6460\_L1\_Tile\_rc|1  
TGTAGGAAAAATAATTTGAACTGGCTAAATTTGCAGTAGACCCAGAGCCTTTAATGTATAA  
>HPV16\_Alpha\_9627100\_nt6640\_L1\_Tile\_rc|1  
TGTAGTTTCTGAAGTAGATATGGCAGCACATAATGACATATTTGTACTGCGTGTAGTATC  
>HPV16\_Alpha\_9627100\_nt6650\_L1\_Tile\_rc|1  
TATTTTTATATGTAGTTTCTGAAGTAGATATGGCAGCACATAATGACATATTTGTACTGC  
>HPV16\_Alpha\_9627100\_nt6655\_L1\_Tile\_rc|1  
GTTAGTATTTTTATATGTAGTTTCTGAAGTAGATATGGCAGCACATAATGACATATTTGT  
>HPV16\_Alpha\_9627100\_nt6820\_L1\_Tile\_rc|1  
TAGTGTGCCTCCTGGGGGAGGTTGTAGACCAAAATTCAGTCCTCCAAAATAGTGGAATT  
>HPV16\_Alpha\_9627100\_nt6845\_L1\_Tile\_rc|1  
GGGTTACAAACCTATAAGTATCTTCTAGTGTGCCTCCTGGGGGAGGTTGTAGACCAAAAT  
>HPV16\_Alpha\_9627100\_nt6850\_L1\_Tile\_rc|1  
TGCCTGGGTTACAAACCTATAAGTATCTTCTAGTGTGCCTCCTGGGGGAGGTTGTAGACC  
>HPV16\_Alpha\_9627100\_nt6860\_L1\_Tile\_rc|1  
GACAAGCAATTGCCTGGGTTACAAACCTATAAGTATCTTCTAGTGTGCCTCCTGGGGGAG  
>HPV16\_Alpha\_9627100\_nt6865\_L1\_Tile\_rc|1  
TTTTTGCAGCAATTGCCTGGGTTACAAACCTATAAGTATCTTCTAGTGTGCCTCCTGG  
>HPV16\_Alpha\_9627100\_nt6870\_L1\_Tile\_rc|1  
GTATGTTTTTGCAGCAATTGCCTGGGTTACAAACCTATAAGTATCTTCTAGTGTGCCT  
>HPV16\_Alpha\_9627100\_nt6880\_L1\_Tile\_rc|1  
TGCTGGAGGTGTATGTTTTTGCAGCAATTGCCTGGGTTACAAACCTATAAGTATCTTC  
>HPV16\_Alpha\_9627100\_nt6890\_L1\_Tile\_rc|1  
CTTCTTTAGGTGCTGGAGGTGTATGTTTTTGACAAGCAATTGCCTGGGTTACAAACCTAT  
>HPV16\_Alpha\_9627100\_nt6900\_L1\_Tile\_rc|1  
AGGGGATCATCTTCTTTAGGTGCTGGAGGTGTATGTTTTTGACAAGCAATTGCCTGGGTT  
>HPV16\_Alpha\_9627100\_nt6910\_L1\_Tile\_rc|1  
GTATTTTTTAAGGGATCATCTTCTTTAGGTGCTGGAGGTGTATGTTTTTGACAAGCAAT  
>HPV16\_Alpha\_9627100\_nt6915\_L1\_Tile\_rc|1  
AAAGTGTATTTTTTAAGGGGATCATCTTCTTTAGGTGCTGGAGGTGTATGTTTTTGACAA  
>HPV16\_Alpha\_9627100\_nt6920\_L1\_Tile\_rc|1  
CCCCAAAAGTGATTTTTTTAAGGGGATCATCTTCTTTAGGTGCTGGAGGTGTATGTTTTT  
>HPV16\_Alpha\_9627100\_nt6930\_L1\_Tile\_rc|1  
AAATTTACTTCCCAAAAAGTGTATTTTTTAAGGGGATCATCTTCTTTAGGTGCTGGAGGT  
>HPV16\_Alpha\_9627100\_nt6935\_L1\_Tile\_rc|1  
CCTTTAAATTTACTTCCCAAAAAGTGTATTTTTTAAGGGGATCATCTTCTTTAGGTGCTG  
>HPV16\_Alpha\_9627100\_nt7020\_L1\_Tile\_rc|1  
GTAAATTTTGGTTTGGCCTTCAATCCTGCTTGTAGTAAAAATTTGCGTCCTAAAGGAAAC  
>HPV16\_Alpha\_9627100\_nt7025\_L1\_Tile\_rc|1  
CTAATGTAAATTTTGGTTTGGCCTTCAATCCTGCTTGTAGTAAAAATTTGCGTCCTAAAG  
>HPV16\_Alpha\_9627100\_nt7030\_L1\_Tile\_rc|1  
TTTTCCTAATGTAAATTTTGGTTTGGCCTTCAATCCTGCTTGTAGTAAAAATTTGCGTCC  
>HPV16\_Alpha\_9627100\_nt7035\_L1\_Tile\_rc|1  
TTTCGTTTCCCTAATGTAAATTTTGGTTTGGCCTTCAATCCTGCTTGTAGTAAAAATTTG  
>HPV16\_Alpha\_9627100\_nt7040\_L1\_Tile\_rc|1  
TAGCTTTTCGTTTCCCTAATGTAAATTTTGGTTTGGCCTTCAATCCTGCTTGTAGTAAAA  
>HPV16\_Alpha\_9627100\_nt7050\_L1\_Tile\_rc|1  
GTGGTGGGTGTAGCTTTTCGTTTCCCTAATGTAAATTTTGGTTTGGCCTTCAATCCTGCT  
>HPV16\_Alpha\_9627100\_nt7055\_L1\_Tile\_rc|1  
ATGAGGTGGTGGGTGTAGCTTTTCGTTTCCCTAATGTAAATTTTGGTTTGGCCTTCAATC  
>HPV16\_Alpha\_9627100\_nt7065\_L1\_Tile\_rc|1  
GTAGAGGTAGATGAGGTGGTGGGTGTAGCTTTTCGTTTCCCTAATGTAAATTTTGGTTTGG  
>HPV16\_Alpha\_9627100\_nt7070\_L1\_Tile\_rc|1  
CAGTTGTAGAGGTAGATGAGGTGGTGGGTGTAGCTTTTCGTTTCCCTAATGTAAATTTTGG  
>HPV16\_Alpha\_9627100\_nt7075\_L1\_Tile\_rc|1

TTTAGCAGTTGTAGAGGTAGATGAGGTGGTGGGTGTAGCTTTTCGTTTTCTAATGTAAA  
>HPV16\_Alpha\_9627100\_nt7085\_L1\_Tile\_rc|1  
GTTTTTTGCGTTTAGCAGTTGTAGAGGTAGATGAGGTGGTGGGTGTAGCTTTTCGTTTTC  
>HPV16\_Alpha\_9627100\_nt7095\_L1\_Tile\_rc|1  
TACAGCTTACGTTTTTTGCGTTTAGCAGTTGTAGAGGTAGATGAGGTGGTGGGTGTAGCT  
>HPV16\_Alpha\_9627100\_nt7096\_L1\_Tile\_rc|1  
TTACAGCTTACGTTTTTTGCGTTTAGCAGTTGTAGAGGTAGATGAGGTGGTGGGTGTAGC  
>HPV17\_Beta\_396932\_nt6085\_L1\_Tile\_rc|1  
AGATCCACCTTGATAGCTACTGTTATTTTCAGTGTCTCTTAAGTTATTAAACAAGGGATG  
>HPV17\_Beta\_396932\_nt6205\_L1\_Tile\_rc|1  
GTTTTGTTCATTTTCACATACAGGAGCCCTGTCCCAATGTTCTCCAATACAAGGTACACA  
>HPV17\_Beta\_396932\_nt6210\_L1\_Tile\_rc|1  
TGATTGTTTTGTTTCATTTTCACATACAGGAGCCCTGTCCCAATGTTCTCCAATACAAGGT  
>HPV17\_Beta\_396932\_nt6215\_L1\_Tile\_rc|1  
CTGTTTGATTGTTTTGTTTCATTTTCACATACAGGAGCCCTGTCCCAATGTTCTCCAATAC  
>HPV17\_Beta\_396932\_nt6230\_L1\_Tile\_rc|1  
ATGGTGGACACAGGCCTGTTTGATTGTTTGTTCATTTTCACATACAGGAGCCCTGTCCC  
>HPV17\_Beta\_396932\_nt6240\_L1\_Tile\_rc|1  
TTTAATTCCAATGGTGGACACAGGCCTGTTTGATTGTTTGTTCATTTTCACATACAGGA  
>HPV17\_Beta\_396932\_nt6245\_L1\_Tile\_rc|1  
TGTTTTTTAATTCCAATGGTGGACACAGGCCTGTTTGATTGTTTGTTCATTTTCACATA  
>HPV17\_Beta\_396932\_nt6255\_L1\_Tile\_rc|1  
TCGATAACAGTGTTTTTTAATTCCAATGGTGGACACAGGCCTGTTTGATTGTTTTGTTCA  
>HPV17\_Beta\_396932\_nt6565\_L1\_Tile\_rc|1  
AGTGAATTACCCAAAGTGCCTGTTGTTGGCCAGTTTGAGCTGGTAAATAAAATTTGTG  
>HPV17\_Beta\_396932\_nt6730\_L1\_Tile\_rc|1  
GCTAATAGAAAAATTTGTGTTTCCTAGTGTTGTCAGCTACAGTCACAAATATCTGATTCCC  
>HPV17\_Beta\_396932\_nt6745\_L1\_Tile\_rc|1  
AGCTTCTGTAGACACGCTAATAGAAAAATTTGTGTTTCCTAGTGTTGTCAGCTACAGTCAC  
>HPV17\_Beta\_396932\_nt6755\_L1\_Tile\_rc|1  
TAACAGCCCCAGCTTCTGTAGACACGCTAATAGAAAAATTTGTGTTTCCTAGTGTTGTCAG  
>HPV17\_Beta\_396932\_nt7100\_L1\_Tile\_rc|1  
ATTTTCGTCCTAGGGGATACTGATCTAAATCTAATGATAATTTCTCAGTAAGATTTACAT  
>HPV17\_Beta\_396932\_nt7105\_L1\_Tile\_rc|1  
AATAAATTTTCGTCCTAGGGGATACTGATCTAAATCTAATGATAATTTCTCAGTAAGATT  
>HPV18\_Alpha\_9626069\_nt5436\_L1\_Tile\_rc|1  
TACAATGGGCCATACAGAGGTAGTAGATGGTAATGTAATATCAGGACCCGTGTATACAGG  
>HPV18\_Alpha\_9626069\_nt5441\_L1\_Tile\_rc|1  
GGTGATACAATGGGCCATACAGAGGTAGTAGATGGTAATGTAATATCAGGACCCGTGTAT  
>HPV18\_Alpha\_9626069\_nt5446\_L1\_Tile\_rc|1  
CCGTGGGTGATACAATGGGCCATACAGAGGTAGTAGATGGTAATGTAATATCAGGACCCG  
>HPV18\_Alpha\_9626069\_nt5466\_L1\_Tile\_rc|1  
ATACTGTGTAGAGGCAGGGGCCGTGGGTGATACAATGGGCCATACAGAGGTAGTAGATGG  
>HPV18\_Alpha\_9626069\_nt5476\_L1\_Tile\_rc|1  
GTATACCAATATACTGTGTAGAGGCAGGGGCCGTGGGTGATACAATGGGCCATACAGAGG  
>HPV18\_Alpha\_9626069\_nt5481\_L1\_Tile\_rc|1  
ACCATGTATACCAATATACTGTGTAGAGGCAGGGGCCGTGGGTGATACAATGGGCCATAC  
>HPV18\_Alpha\_9626069\_nt5486\_L1\_Tile\_rc|1  
TGTGTACCATGTATACCAATATACTGTGTAGAGGCAGGGGCCGTGGGTGATACAATGGGC  
>HPV18\_Alpha\_9626069\_nt5491\_L1\_Tile\_rc|1  
AATAATGTGTACCATGTATACCAATATACTGTGTAGAGGCAGGGGCCGTGGGTGATACAA  
>HPV18\_Alpha\_9626069\_nt5496\_L1\_Tile\_rc|1  
CAAATAATAATGTGTACCATGTATACCAATATACTGTGTAGAGGCAGGGGCCGTGGGTGA  
>HPV18\_Alpha\_9626069\_nt5506\_L1\_Tile\_rc|1  
ATAATGGCCACAAATAATAATGTGTACCATGTATACCAATATACTGTGTAGAGGCAGGGG

>HPV18\_Alpha\_9626069\_nt5511\_L1\_Tile\_rc|1  
ATAATATAATGGCCACAAATAATAATGTGTACCATGTATACCAATATACTGTGTAGAGGC  
>HPV18\_Alpha\_9626069\_nt5976\_L1\_Tile\_rc|1  
TCAGAAACATTAGACGTGGCGGCATGGGAACTTTCAGTGTTCATCTAATTTATTATAAAAT  
>HPV18\_Alpha\_9626069\_nt5981\_L1\_Tile\_rc|1  
CGTCCTCAGAAACATTAGACGTGGCGGCATGGGAACTTTCAGTGTTCATCTAATTTATTAT  
>HPV18\_Alpha\_9626069\_nt5996\_L1\_Tile\_rc|1  
ACACATTGTCCCTAACGTCCTCAGAAACATTAGACGTGGCGGCATGGGAACTTTCAGTGT  
>HPV18\_Alpha\_9626069\_nt6131\_L1\_Tile\_rc|1  
TGTTTTTAAAGTTCTAAAGGGGGGCAATCGCCCTGTGATAAAGGACGCGATTTACAAGCAG  
>HPV18\_Alpha\_9626069\_nt6136\_L1\_Tile\_rc|1  
AACTGTGTTTTTAAAGTTCTAAAGGGGGGCAATCGCCCTGTGATAAAGGACGCGATTTACA  
>HPV18\_Alpha\_9626069\_nt6146\_L1\_Tile\_rc|1  
CATCTTCCAAAACGTGTGTTTTTAAAGTTCTAAAGGGGGGCAATCGCCCTGTGATAAAGGAC  
>HPV18\_Alpha\_9626069\_nt6421\_L1\_Tile\_rc|1  
ACAGCTGCCAGGTGAAGCAGGCATACCTGTGCCTTTAATATATAAGGATTGAGGCACAGT  
>HPV18\_Alpha\_9626069\_nt6426\_L1\_Tile\_rc|1  
TACACACAGCTGCCAGGTGAAGCAGGCATACCTGTGCCTTTAATATATAAGGATTGAGGC  
>HPV18\_Alpha\_9626069\_nt6441\_L1\_Tile\_rc|1  
CTTGAGAGGGAGAATACACACAGCTGCCAGGTGAAGCAGGCATACCTGTGCCTTTAATA  
>HPV18\_Alpha\_9626069\_nt6621\_L1\_Tile\_rc|1  
TATTGCCCAGGTACAGGAGACTGTGTAGAACACATATTGTTAAATTGGTACTGGGAGTG  
>HPV18\_Alpha\_9626069\_nt6626\_L1\_Tile\_rc|1  
CATCATATTGCCCAGGTACAGGAGACTGTGTAGAACACATATTGTTAAATTGGTACTGG  
>HPV18\_Alpha\_9626069\_nt6631\_L1\_Tile\_rc|1  
GGTAGCATCATATTGCCCAGGTACAGGAGACTGTGTAGAACACATATTGTTAAATTGGT  
>HPV18\_Alpha\_9626069\_nt6636\_L1\_Tile\_rc|1  
AATTTGGTAGCATCATATTGCCCAGGTACAGGAGACTGTGTAGAACACATATTGTTAAA  
>HPV18\_Alpha\_9626069\_nt6641\_L1\_Tile\_rc|1  
GCTTAAATTTGGTAGCATCATATTGCCCAGGTACAGGAGACTGTGTAGAACACATATTG  
>HPV18\_Alpha\_9626069\_nt6651\_L1\_Tile\_rc|1  
CTGCTATACTGCTTAAATTTGGTAGCATCATATTGCCCAGGTACAGGAGACTGTGTAGAA  
>HPV18\_Alpha\_9626069\_nt6791\_L1\_Tile\_rc|1  
TAGTTGGGGGGGGGGAACACCAAAGTTCCAATCCTCTAAAATACTGCTATTCATACTAT  
>HPV18\_Alpha\_9626069\_nt7078\_L1\_Tile\_rc|1  
TTACTTCCCTGGCACGTACACGCACACGCTTGGCAGGTTTAGAAGACGTAGTGGCAGATGG  
>HPV19\_Beta\_396940\_nt5795\_L1\_Tile\_rc|1  
AGAAAATTATAAATATTTACGTTTTTCGTTTGAATCGCTTGCGAAGGCTGGGATGTAAGTA  
>HPV19\_Beta\_396940\_nt5800\_L1\_Tile\_rc|1  
GCAAAAGAAAATTATAAATATTTACGTTTTTCGTTTGAATCGCTTGCGAAGGCTGGGATGT  
>HPV19\_Beta\_396940\_nt6005\_L1\_Tile\_rc|1  
CCTGAAACTTTTGGAATTTCTAATTTTGATCCTGCAACATTATAAACATTAAAATATGGG  
>HPV19\_Beta\_396940\_nt6010\_L1\_Tile\_rc|1  
GATTTCTTGAACTTTTGGAATTTCTAATTTTGATCCTGCAACATTATAAACATTAAAAT  
>HPV19\_Beta\_396940\_nt6360\_L1\_Tile\_rc|1  
AGGACAGGATCCCTGAGGAATATCTTGCTCAGCACATGGTAATGCTTTATCCCAGTGTTT  
>HPV19\_Beta\_396940\_nt6370\_L1\_Tile\_rc|1  
ACTCTATAGGAGGACAGGATCCCTGAGGAATATCTTGCTCAGCACATGGTAATGCTTTAT  
>HPV19\_Beta\_396940\_nt6375\_L1\_Tile\_rc|1  
AATTAACCTCTATAGGAGGACAGGATCCCTGAGGAATATCTTGCTCAGCACATGGTAATGC  
>HPV19\_Beta\_396940\_nt6380\_L1\_Tile\_rc|1  
GAGTTAATTAACCTCTATAGGAGGACAGGATCCCTGAGGAATATCTTGCTCAGCACATGGT  
>HPV19\_Beta\_396940\_nt6385\_L1\_Tile\_rc|1  
TAACTGAGTTAATTAACCTCTATAGGAGGACAGGATCCCTGAGGAATATCTTGCTCAGCAC  
>HPV19\_Beta\_396940\_nt6400\_L1\_Tile\_rc|1

TGTCTCCATCTTCAATAACTGAGTTAATTAAGTCTATAGGAGGACAGGATCCCTGAGGAA  
>HPV19\_Beta\_396940\_nt6710\_L1\_Tile\_rc|1  
ATGGCATTTCCTAAATTAGTATATTGTTGCTGACTATTGTTAGGAGGTATGTAGTATGTA  
>HPV19\_Beta\_396940\_nt7125\_L1\_Tile\_rc|1  
TAAAGAATCTATATATCTATAAGTGTCTGAATAGGATTATCGGGTGCAGGCACGAAACC  
>HPV19\_Beta\_396940\_nt7160\_L1\_Tile\_rc|1  
TCCTTAGGAGGATTTTTGTCAGGGCATCTAGTAGCTAAAGAATCTATATATCTATAAGTG  
>HPV19\_Beta\_396940\_nt7355\_L1\_Tile\_rc|1  
TAATTTTTTACGCTTTCTTTTAGTTCTCTGCTGGAGACCCGTGAAGATATAGTTTTTGTA  
>HPV19\_Beta\_396940\_nt7356\_L1\_Tile\_rc|1  
TTAATTTTTACGCTTTCTTTTAGTTCTCTGCTGGAGACCCGTGAAGATATAGTTTTTGT  
>HPV20\_Beta\_1020162\_nt6039\_L1\_Tile\_rc|1  
TTCCAGAAACCTTAGGGACTTTTATCTTAGTGCCTTGGATGTCATATATATTTAAATATG  
>HPV20\_Beta\_1020162\_nt6044\_L1\_Tile\_rc|1  
CTGATTTCCAGAAACCTTAGGGACTTTTATCTTAGTGCCTTGGATGTCATATATATTTAA  
>HPV20\_Beta\_1020162\_nt6049\_L1\_Tile\_rc|1  
CTGTGCTGATTTCCAGAAACCTTAGGGACTTTTATCTTAGTGCCTTGGATGTCATATATA  
>HPV20\_Beta\_1020162\_nt6259\_L1\_Tile\_rc|1  
TCAGTTGAATTCCTTTTATATGAATTAGGGTTTTCTGTGTACCAAGTTTATTAAATAAT  
>HPV20\_Beta\_1020162\_nt6264\_L1\_Tile\_rc|1  
TATCATCAGTTGAATTCCTTTTATATGAATTAGGGTTTTCTGTGTACCAAGTTTATTAA  
>HPV20\_Beta\_1020162\_nt6269\_L1\_Tile\_rc|1  
TTGTCTATCATCAGTTGAATTCCTTTTATATGAATTAGGGTTTTCTGTGTACCAAGTTT  
>HPV20\_Beta\_1020162\_nt6274\_L1\_Tile\_rc|1  
ACATTTTGTCTATCATCAGTTGAATTCCTTTTATATGAATTAGGGTTTTCTGTGTACCA  
>HPV20\_Beta\_1020162\_nt6399\_L1\_Tile\_rc|1  
CTATTGGAGGGCATGAACCTGGGTTTGGAAACGTCGTCTGCACATGGTAAAGCCCTGTCCC  
>HPV20\_Beta\_1020162\_nt6739\_L1\_Tile\_rc|1  
ATTGAATTACCTAGGTTGTTCTGTGCCTGATTATTCACAGGTGGAATGTAGAATGCATTC  
>HPV20\_Beta\_1020162\_nt6744\_L1\_Tile\_rc|1  
AATACATTGAATTACCTAGGTTGTTCTGTGCCTGATTATTCACAGGTGGAATGTAGAATG  
>HPV20\_Beta\_1020162\_nt6894\_L1\_Tile\_rc|1  
AATTTGTATTTTCGAGTATTATCTACTACAGTAACAAATAGTTGATTGAACCAGCAGATGC  
>HPV20\_Beta\_1020162\_nt6904\_L1\_Tile\_rc|1  
GATATGCTAAAATTTGTATTTTCGAGTATTATCTACTACAGTAACAAATAGTTGATTGAAC  
>HPV20\_Beta\_1020162\_nt6914\_L1\_Tile\_rc|1  
TGAATGAAGTATGCTAAAATTTGTATTTTCGAGTATTATCTACTACAGTAACAAATAG  
>HPV20\_Beta\_1020162\_nt6919\_L1\_Tile\_rc|1  
TTTTCTGAATGAAGTATGCTAAAATTTGTATTTTCGAGTATTATCTACTACAGTAACA  
>HPV20\_Beta\_1020162\_nt6924\_L1\_Tile\_rc|1  
CAGTGTTTTCTGAATGAAGTATGCTAAAATTTGTATTTTCGAGTATTATCTACTACAG  
>HPV20\_Beta\_1020162\_nt6929\_L1\_Tile\_rc|1  
AACATCAGTGTTTTCTGAATGAAGTATGCTAAAATTTGTATTTTCGAGTATTATCTAC  
>HPV20\_Beta\_1020162\_nt6934\_L1\_Tile\_rc|1  
TTAGAAACATCAGTGTTTTCTGAATGAAGTATGCTAAAATTTGTATTTTCGAGTATTA  
>HPV20\_Beta\_1020162\_nt6949\_L1\_Tile\_rc|1  
TCATAATTTTGAATTTTAGAAACATCAGTGTTTTCTGAATGAAGTATGCTAAAATTT  
>HPV20\_Beta\_1020162\_nt6954\_L1\_Tile\_rc|1  
GAGAATCATAATTTTGAATTTTAGAAACATCAGTGTTTTCTGAATGAAGTATGCTAA  
>HPV20\_Beta\_1020162\_nt7249\_L1\_Tile\_rc|1  
GATAATCTTTCTGATAGGTCAACATTCCAAAAGTTTAGATCCTTGTAAGGATCTTCTCTT  
>HPV20\_Beta\_1020162\_nt7254\_L1\_Tile\_rc|1  
CTAAGGATAATCTTTCTGATAGGTCAACATTCCAAAAGTTTAGATCCTTGTAAGGATCTT  
>HPV20\_Beta\_1020162\_nt7259\_L1\_Tile\_rc|1  
CAATTCTAAGGATAATCTTTCTGATAGGTCAACATTCCAAAAGTTTAGATCCTTGTAAGG

>HPV20\_Beta\_1020162\_nt7384\_L1\_Tile\_rc|1  
TATTGTTTGC GTTTTC GTTTGACGCCCC TAGTAGATAACTTTGAAGATACAGTTTTTGT  
>HPV20\_Beta\_1020162\_nt7385\_L1\_Tile\_rc|1  
TTATTGTTTGC GTTTTC GTTTGACGCCCC TAGTAGATAACTTTGAAGATACAGTTTTTGT  
>HPV21\_Beta\_1020170\_nt6300\_L1\_Tile\_rc|1  
CAGTAGAATTTGGTTGAGTTTTGTATGAACTAGGATTTTCTGTGTCCCCAACTTTATTAA  
>HPV21\_Beta\_1020170\_nt6305\_L1\_Tile\_rc|1  
ATCATCAGTAGAATTTGGTTGAGTTTTGTATGAACTAGGATTTTCTGTGTCCCCAACTTT  
>HPV21\_Beta\_1020170\_nt6430\_L1\_Tile\_rc|1  
CACGATCCTGGAGGTGGATTGTCTAGTTGCACATGGGATAGCTTTATCCCAATGTTCTCCT  
>HPV21\_Beta\_1020170\_nt6445\_L1\_Tile\_rc|1  
AATTCAATCGGAGGGCACGATCCTGGAGGTGGATTGTCTAGTTGCACATGGGATAGCTTTA  
>HPV21\_Beta\_1020170\_nt6450\_L1\_Tile\_rc|1  
TAATTAATTC AATCGGAGGGCACGATCCTGGAGGTGGATTGTCTAGTTGCACATGGGATAG  
>HPV21\_Beta\_1020170\_nt6455\_L1\_Tile\_rc|1  
TGAATTAATTAATTC AATCGGAGGGCACGATCCTGGAGGTGGATTGTCTAGTTGCACATGG  
>HPV21\_Beta\_1020170\_nt6460\_L1\_Tile\_rc|1  
ATTGCTGAATTAATTAATTC AATCGGAGGGCACGATCCTGGAGGTGGATTGTCTAGTTGCA  
>HPV21\_Beta\_1020170\_nt6970\_L1\_Tile\_rc|1  
ACGTCTGCATTCTCAGGATTTACTGAAATACTAAAGTTTGTGTTACGAGTGTTGTCTACT  
>HPV21\_Beta\_1020170\_nt6980\_L1\_Tile\_rc|1  
AATTTTACGACACGTCTGCATTCTCAGGATTTACTGAAATACTAAAGTTTGTGTTACGAGT  
>HPV21\_Beta\_1020170\_nt6985\_L1\_Tile\_rc|1  
TTTTCAATTTTACGACACGTCTGCATTCTCAGGATTTACTGAAATACTAAAGTTTGTGTTA  
>HPV21\_Beta\_1020170\_nt6990\_L1\_Tile\_rc|1  
TATAATTTTCAATTTTACGACACGTCTGCATTCTCAGGATTTACTGAAATACTAAAGTTTG  
>HPV21\_Beta\_1020170\_nt6995\_L1\_Tile\_rc|1  
GGCTTTTATAATTTTCAATTTTACGACACGTCTGCATTCTCAGGATTTACTGAAATACTAAA  
>HPV21\_Beta\_1020170\_nt7000\_L1\_Tile\_rc|1  
CTCTCGGCTTTATAATTTTCAATTTTACGACACGTCTGCATTCTCAGGATTTACTGAAATA  
>HPV21\_Beta\_1020170\_nt7005\_L1\_Tile\_rc|1  
GAAAGCTCTCGGCTTTATAATTTTCAATTTTACGACACGTCTGCATTCTCAGGATTTACTG  
>HPV21\_Beta\_1020170\_nt7425\_L1\_Tile\_rc|1  
AATTTTTGCGTTTTTCGTTTAATTCCTCTGGTAGATACCCTTGAAGAAAGTGCTTTTGTAC  
>HPV21\_Beta\_1020170\_nt7427\_L1\_Tile\_rc|1  
CTAATTTTTGCGTTTTTCGTTTAATTCCTCTGGTAGATACCCTTGAAGAAAGTGCTTTTGT  
>HPV22\_Beta\_1020178\_nt5883\_L1\_Tile\_rc|1  
GATCATGGATTGTCATATCTCCCAAAGCAAATTTGTTAGGATCTGGAAATGTTACTCTAA  
>HPV22\_Beta\_1020178\_nt5893\_L1\_Tile\_rc|1  
TACCTTTTCGGGATCATGGATTGTCATATCTCCCAAAGCAAATTTGTTAGGATCTGGAAAT  
>HPV22\_Beta\_1020178\_nt5898\_L1\_Tile\_rc|1  
ATCTATACCTTTTCGGGATCATGGATTGTCATATCTCCCAAAGCAAATTTGTTAGGATCTG  
>HPV22\_Beta\_1020178\_nt5903\_L1\_Tile\_rc|1  
TACTAATCTATACCTTTTCGGGATCATGGATTGTCATATCTCCCAAAGCAAATTTGTTAGG  
>HPV22\_Beta\_1020178\_nt5908\_L1\_Tile\_rc|1  
GCCCATACTAATCTATACCTTTTCGGGATCATGGATTGTCATATCTCCCAAAGCAAATTTG  
>HPV22\_Beta\_1020178\_nt5913\_L1\_Tile\_rc|1  
TACAAGCCCATACTAATCTATACCTTTTCGGGATCATGGATTGTCATATCTCCCAAAGCAA  
>HPV22\_Beta\_1020178\_nt5918\_L1\_Tile\_rc|1  
CCCTTTACAAGCCCATACTAATCTATACCTTTTCGGGATCATGGATTGTCATATCTCCCAA  
>HPV22\_Beta\_1020178\_nt5923\_L1\_Tile\_rc|1  
TCTAACCTTTTACAAGCCCATACTAATCTATACCTTTTCGGGATCATGGATTGTCATATCT  
>HPV22\_Beta\_1020178\_nt5928\_L1\_Tile\_rc|1  
CTATTTCTAACCTTTTACAAGCCCATACTAATCTATACCTTTTCGGGATCATGGATTGTCA  
>HPV22\_Beta\_1020178\_nt5933\_L1\_Tile\_rc|1

TCTTCCTATTTCTAACCCTTTACAAGCCCATACTAATCTATACCTTTCTGGGATCATGGAT  
>HPV22\_Beta\_1020178\_nt6028\_L1\_Tile\_rc|1  
TCTGATGTTCCCTTCCTGGCGTTCAGTAGGGTTTTTCAGTATCATGTAATTTATTAAATAAT  
>HPV22\_Beta\_1020178\_nt6033\_L1\_Tile\_rc|1  
TATCATCTGATGTTCCCTTCCTGGCGTTCAGTAGGGTTTTTCAGTATCATGTAATTTATTAA  
>HPV22\_Beta\_1020178\_nt6038\_L1\_Tile\_rc|1  
TCTTCTATCATCTGATGTTCCCTTCCTGGCGTTCAGTAGGGTTTTTCAGTATCATGTAATTT  
>HPV22\_Beta\_1020178\_nt6043\_L1\_Tile\_rc|1  
ACATTTCTTCTATCATCTGATGTTCCCTTCCTGGCGTTCAGTAGGGTTTTTCAGTATCATGT  
>HPV22\_Beta\_1020178\_nt6288\_L1\_Tile\_rc|1  
AGATTTTCATTTACAATGTCTAAGCTTACATCAGATCTATTAAATGATAGTGTTTTATTAT  
>HPV22\_Beta\_1020178\_nt6358\_L1\_Tile\_rc|1  
CTACGTGCACAAAAAAGCATGAGTCGCCATAGACATCATTTGACATTGTAAGAAAATCA  
>HPV22\_Beta\_1020178\_nt6363\_L1\_Tile\_rc|1  
GCTCCCTACGTGCACAAAAAAGCATGAGTCGCCATAGACATCATTTGACATTGTAAGAA  
>HPV22\_Beta\_1020178\_nt6428\_L1\_Tile\_rc|1  
TGCATCATCTGGTATAGCATCACCAACAAGACCACCACGTACAAAATTGTGTCGTGCATA  
>HPV22\_Beta\_1020178\_nt6433\_L1\_Tile\_rc|1  
TGAAGTGCATCATCTGGTATAGCATCACCAACAAGACCACCACGTACAAAATTGTGTCGT  
>HPV22\_Beta\_1020178\_nt6443\_L1\_Tile\_rc|1  
ATGATCTTGTTGAACTGCATCATCTGGTATAGCATCACCAACAAGACCACCACGTACAAA  
>HPV22\_Beta\_1020178\_nt6453\_L1\_Tile\_rc|1  
AGTAATATTTATGATCTTGTTGAACTGCATCATCTGGTATAGCATCACCAACAAGACCAC  
>HPV22\_Beta\_1020178\_nt6458\_L1\_Tile\_rc|1  
AGGCAAGTAATATTTATGATCTTGTTGAACTGCATCATCTGGTATAGCATCACCAACAAG  
>HPV22\_Beta\_1020178\_nt6473\_L1\_Tile\_rc|1  
AGTCTGTGAAGCTGCAGGCAAGTAATATTTATGATCTTGTTGAACTGCATCATCTGGTAT  
>HPV22\_Beta\_1020178\_nt6498\_L1\_Tile\_rc|1  
GAAAGTAAGTGGAGTTTTCTAAAGCAGTCTGTGAAGCTGCAGGCAAGTAATATTTATGAT  
>HPV22\_Beta\_1020178\_nt6503\_L1\_Tile\_rc|1  
GGTTGGAAAGTAAGTGGAGTTTTCTAAAGCAGTCTGTGAAGCTGCAGGCAAGTAATATTT  
>HPV22\_Beta\_1020178\_nt6508\_L1\_Tile\_rc|1  
CTAACGGTTGGAAAGTAAGTGGAGTTTTCTAAAGCAGTCTGTGAAGCTGCAGGCAAGTAA  
>HPV22\_Beta\_1020178\_nt6513\_L1\_Tile\_rc|1  
AACCACCTAACGGTTGGAAAGTAAGTGGAGTTTTCTAAAGCAGTCTGTGAAGCTGCAGGCA  
>HPV22\_Beta\_1020178\_nt6518\_L1\_Tile\_rc|1  
TAAAGAACCACCTAACGGTTGGAAAGTAAGTGGAGTTTTCTAAAGCAGTCTGTGAAGCTGC  
>HPV22\_Beta\_1020178\_nt6573\_L1\_Tile\_rc|1  
CCTGCGCGCGCTTCAACCAAAAAGCCTGTTGAATAGTTGGGCATCAGAGGTTACTAAAG  
>HPV22\_Beta\_1020178\_nt6683\_L1\_Tile\_rc|1  
ATTAAGTGTGGTGCCGTCACCTTGCCACACTAATAGAAAAATTAGTGTTACGGGTATTATC  
>HPV22\_Beta\_1020178\_nt6688\_L1\_Tile\_rc|1  
TCATAATTAAGTGTGGTGCCGTCACCTTGCCACACTAATAGAAAAATTAGTGTTACGGGTA  
>HPV22\_Beta\_1020178\_nt6693\_L1\_Tile\_rc|1  
TAGCATCATAATTAAGTGTGGTGCCGTCACCTTGCCACACTAATAGAAAAATTAGTGTTAC  
>HPV22\_Beta\_1020178\_nt6698\_L1\_Tile\_rc|1  
TTTTTTTAGCATCATAATTAAGTGTGGTGCCGTCACCTTGCCACACTAATAGAAAAATTAGT  
>HPV22\_Beta\_1020178\_nt6703\_L1\_Tile\_rc|1  
CTGATTTTTTTAGCATCATAATTAAGTGTGGTGCCGTCACCTTGCCACACTAATAGAAAA  
>HPV22\_Beta\_1020178\_nt6708\_L1\_Tile\_rc|1  
ATTCTCTGATTTTTTTTAGCATCATAATTAAGTGTGGTGCCGTCACCTTGCCACACTAATAG  
>HPV22\_Beta\_1020178\_nt6718\_L1\_Tile\_rc|1  
TGGCGCATAAATTCTCTGATTTTTTTTAGCATCATAATTAAGTGTGGTGCCGTCACCTGCC  
>HPV22\_Beta\_1020178\_nt6738\_L1\_Tile\_rc|1  
ATAATTGGTATTCTTCCACATGGCGCATAAATTCTCTGATTTTTTTTAGCATCATAATTAA

>HPV22\_Beta\_1020178\_nt6763\_L1\_Tile\_rc|1  
ATTCTACATAGCTGCAAAATAAAGGATAATTGGTATTCTTCCACATGGCGCATAAATTCT  
>HPV22\_Beta\_1020178\_nt6768\_L1\_Tile\_rc|1  
ATGGTATTCTACATAGCTGCAAAATAAAGGATAATTGGTATTCTTCCACATGGCGCATAA  
>HPV22\_Beta\_1020178\_nt6773\_L1\_Tile\_rc|1  
TTCTAATGGTATTCTACATAGCTGCAAAATAAAGGATAATTGGTATTCTTCCACATGGCG  
>HPV22\_Beta\_1020178\_nt6783\_L1\_Tile\_rc|1  
ATACCTCTGCTTCTAATGGTATTCTACATAGCTGCAAAATAAAGGATAATTGGTATTCTT  
>HPV22\_Beta\_1020178\_nt6788\_L1\_Tile\_rc|1  
AGTTAATACCTCTGCTTCTAATGGTATTCTACATAGCTGCAAAATAAAGGATAATTGGTA  
>HPV22\_Beta\_1020178\_nt6793\_L1\_Tile\_rc|1  
ATTTGAGTTAATACCTCTGCTTCTAATGGTATTCTACATAGCTGCAAAATAAAGGATAAT  
>HPV22\_Beta\_1020178\_nt6808\_L1\_Tile\_rc|1  
TGATTCATGGCATTAAATTTGAGTTAATACCTCTGCTTCTAATGGTATTCTACATAGCTGC  
>HPV22\_Beta\_1020178\_nt6813\_L1\_Tile\_rc|1  
TGCCATGATTCATGGCATTAAATTTGAGTTAATACCTCTGCTTCTAATGGTATTCTACATA  
>HPV22\_Beta\_1020178\_nt7063\_L1\_Tile\_rc|1  
GCACTGGCCCTTGACGTTGTAACCCAGATTGAAATAAAAATTTACGACCCAGTGGATAC  
>HPV22\_Beta\_1020178\_nt7083\_L1\_Tile\_rc|1  
AACGTTTCACACTGACCCTGGCACTGGCCCTTGACGTTGTAACCCAGATTGAAATAAAA  
>HPV22\_Beta\_1020178\_nt7088\_L1\_Tile\_rc|1  
AGCAGAACGTTTCACACTGACCCTGGCACTGGCCCTTGACGTTGTAACCCAGATTGAAA  
>HPV22\_Beta\_1020178\_nt7098\_L1\_Tile\_rc|1  
TTTTCCGCGTAGCAGAACGTTTCACACTGACCCTGGCACTGGCCCTTGACGTTGTAACC  
>HPV22\_Beta\_1020178\_nt7128\_L1\_Tile\_rc|1  
TAAGTTTCCCTCGTTTTACAGTTTTAGACGTTTTCCGCGTAGCAGAACGTTTCACACTGA  
>HPV23\_Beta\_1020186\_nt5816\_L1\_Tile\_rc|1  
CTGAATTGATTCCCTGAAACCTTTGGTACATCTATTTTACTACCATCCGGTGATCTAACA  
>HPV23\_Beta\_1020186\_nt5896\_L1\_Tile\_rc|1  
ACCTGTATTTATCAGGATCATAGATAGTCATGTCTGCTAATGCAAACCTATTAGGGTCTG  
>HPV23\_Beta\_1020186\_nt5971\_L1\_Tile\_rc|1  
ATAGCGGGTGTCCTGTACTGCCGACCCCTAAAGGTTGGCCGCGGCCGATTTCAGTCCTG  
>HPV23\_Beta\_1020186\_nt6001\_L1\_Tile\_rc|1  
TAGAATTTTCTGCATCACGGAGCTTATTAAATAGCGGGTGTCCTGTACTGCCGACCCCTA  
>HPV23\_Beta\_1020186\_nt6006\_L1\_Tile\_rc|1  
TTCCTAGAAATTTTCTGCATCACGGAGCTTATTAAATAGCGGGTGTCCTGTACTGCCGAC  
>HPV23\_Beta\_1020186\_nt6026\_L1\_Tile\_rc|1  
TCTACAGTACCTTCCTGACGTTCACTAGAATTTTCTGCATCACGGAGCTTATTAAATAGC  
>HPV23\_Beta\_1020186\_nt6031\_L1\_Tile\_rc|1  
TGTCATCTACAGTACCTTCCTGACGTTCACTAGAATTTTCTGCATCACGGAGCTTATTAA  
>HPV23\_Beta\_1020186\_nt6041\_L1\_Tile\_rc|1  
ATATTTCTTCTGTCATCTACAGTACCTTCCTGACGTTCACTAGAATTTTCTGCATCACGG  
>HPV23\_Beta\_1020186\_nt6046\_L1\_Tile\_rc|1  
ATGAGATATTTCTTCTGTCATCTACAGTACCTTCCTGACGTTCACTAGAATTTTCTGCAT  
>HPV23\_Beta\_1020186\_nt6051\_L1\_Tile\_rc|1  
ATCAAATGAGATATTTCTTCTGTCATCTACAGTACCTTCCTGACGTTCACTAGAATTTTC  
>HPV23\_Beta\_1020186\_nt6166\_L1\_Tile\_rc|1  
CTAAAGGAGGACACAACCCTAGTTGGCTACCTGCATCTTTACAGACAGGAGCTGTATCCC  
>HPV23\_Beta\_1020186\_nt6181\_L1\_Tile\_rc|1  
CACTGTTTTTAAATTCTAAAGGAGGACACAACCCTAGTTGGCTACCTGCATCTTTACAGA  
>HPV23\_Beta\_1020186\_nt6236\_L1\_Tile\_rc|1  
GTTTTATTATTGATATTACCAAAGCCAATGTCTGAACATGTCCCCATCTTCTATAACACTG  
>HPV23\_Beta\_1020186\_nt6246\_L1\_Tile\_rc|1  
AAAGGATAATGTTTTATTATTGATATTACCAAAGCCAATGTCTGAACATGTCCCCATCTTC  
>HPV23\_Beta\_1020186\_nt6256\_L1\_Tile\_rc|1

CTGATCTATTAAAGGATAATGTTTTATTATTGATATTACCAAAGCCAATGTCGAACATGT  
>HPV23\_Beta\_1020186\_nt6286\_L1\_Tile\_rc|1  
AAACCTCATTTACAAGATCTAAACTAACATCTGATCTATTAAAGGATAATGTTTTATTAT  
>HPV23\_Beta\_1020186\_nt6476\_L1\_Tile\_rc|1  
AAAGTGTTTTGTTGGTCTGCAGGTAAATAATATTTGTGATCCTGTTGAACTGCACCATCA  
>HPV23\_Beta\_1020186\_nt6491\_L1\_Tile\_rc|1  
TAAAGTGAGTTTTCTAAAGTGTTTTGTTGGTCTGCAGGTAAATAATATTTGTGATCCTGT  
>HPV23\_Beta\_1020186\_nt6501\_L1\_Tile\_rc|1  
AGTAGGAAAAATAAAGTGAGTTTTCTAAAGTGTTTTGTTGGTCTGCAGGTAAATAATATTT  
>HPV23\_Beta\_1020186\_nt6506\_L1\_Tile\_rc|1  
CTGACAGTAGGAAAAATAAAGTGAGTTTTCTAAAGTGTTTTGTTGGTCTGCAGGTAAATAA  
>HPV23\_Beta\_1020186\_nt6516\_L1\_Tile\_rc|1  
CAAAGATCCACTGACAGTAGGAAAAATAAAGTGAGTTTTCTAAAGTGTTTTGTTGGTCTGC  
>HPV23\_Beta\_1020186\_nt6521\_L1\_Tile\_rc|1  
GTTACCAAAGATCCACTGACAGTAGGAAAAATAAAGTGAGTTTTCTAAAGTGTTTTGTTGG  
>HPV23\_Beta\_1020186\_nt6526\_L1\_Tile\_rc|1  
CAGAAGTTACCAAAGATCCACTGACAGTAGGAAAAATAAAGTGAGTTTTCTAAAGTGTTTT  
>HPV23\_Beta\_1020186\_nt6646\_L1\_Tile\_rc|1  
TAAAGTTTGATTACGTGTATTATCTGCTACAGTCACAAACATCTGGTTGTTCCATAAAA  
>HPV23\_Beta\_1020186\_nt6651\_L1\_Tile\_rc|1  
GATACTAAAGTTTGTATTACGTGTATTATCTGCTACAGTCACAAACATCTGGTTGTTCCA  
>HPV23\_Beta\_1020186\_nt6666\_L1\_Tile\_rc|1  
GTCATTGGTAACACTGATACTAAAGTTTGTATTACGTGTATTATCTGCTACAGTCACAAA  
>HPV23\_Beta\_1020186\_nt6671\_L1\_Tile\_rc|1  
CTGCTGTCATTGGTAACACTGATACTAAAGTTTGTATTACGTGTATTATCTGCTACAGTC  
>HPV23\_Beta\_1020186\_nt6676\_L1\_Tile\_rc|1  
CTAAACTGCTGTCATTGGTAACACTGATACTAAAGTTTGTATTACGTGTATTATCTGCTA  
>HPV23\_Beta\_1020186\_nt6681\_L1\_Tile\_rc|1  
CTTTTCTAAACTGCTGTCATTGGTAACACTGATACTAAAGTTTGTATTACGTGTATTATC  
>HPV23\_Beta\_1020186\_nt6686\_L1\_Tile\_rc|1  
TCATACTTTTCTAAACTGCTGTCATTGGTAACACTGATACTAAAGTTTGTATTACGTGTA  
>HPV23\_Beta\_1020186\_nt6691\_L1\_Tile\_rc|1  
TGGCATCATACTTTTCTAAACTGCTGTCATTGGTAACACTGATACTAAAGTTTGTATTAC  
>HPV23\_Beta\_1020186\_nt6696\_L1\_Tile\_rc|1  
TTTAGTGGCATCATACTTTTCTAAACTGCTGTCATTGGTAACACTGATACTAAAGTTTGT  
>HPV23\_Beta\_1020186\_nt6701\_L1\_Tile\_rc|1  
CTAATTTTAGTGGCATCATACTTTTCTAAACTGCTGTCATTGGTAACACTGATACTAAAG  
>HPV23\_Beta\_1020186\_nt6706\_L1\_Tile\_rc|1  
ACTCTCTAATTTTAGTGGCATCATACTTTTCTAAACTGCTGTCATTGGTAACACTGATAC  
>HPV23\_Beta\_1020186\_nt6711\_L1\_Tile\_rc|1  
TGTAAACTCTCTAATTTTAGTGGCATCATACTTTTCTAAACTGCTGTCATTGGTAACACT  
>HPV23\_Beta\_1020186\_nt6716\_L1\_Tile\_rc|1  
TGTCTTGTAAACTCTCTAATTTTAGTGGCATCATACTTTTCTAAACTGCTGTCATTGGTA  
>HPV23\_Beta\_1020186\_nt6721\_L1\_Tile\_rc|1  
CAACATGTCTTGTAAACTCTCTAATTTTAGTGGCATCATACTTTTCTAAACTGCTGTCAT  
>HPV23\_Beta\_1020186\_nt6741\_L1\_Tile\_rc|1  
AAAAGAAAGTTGGTATTCTTCAACATGTCTTGTAAACTCTCTAATTTTAGTGGCATCATA  
>HPV23\_Beta\_1020186\_nt6761\_L1\_Tile\_rc|1  
ATCCTGCACAACCTGTAGTATAAAAGAAAGTTGGTATTCTTCAACATGTCTTGTAAACTCT  
>HPV23\_Beta\_1020186\_nt6781\_L1\_Tile\_rc|1  
AGACCTCGGCCTTTAAAGGTATCCTGCACAACCTGTAGTATAAAAGAAAGTTGGTATTCTT  
>HPV23\_Beta\_1020186\_nt6786\_L1\_Tile\_rc|1  
TGTTAAGACCTCGGCCTTTAAAGGTATCCTGCACAACCTGTAGTATAAAAGAAAGTTGGTA  
>HPV23\_Beta\_1020186\_nt6791\_L1\_Tile\_rc|1  
ATTTGTGTTAAGACCTCGGCCTTTAAAGGTATCCTGCACAACCTGTAGTATAAAAGAAAGT



>HPV23\_Beta\_1020186\_nt6796\_L1\_Tile\_rc|1  
CATTAATTTGTGTTAAGACCTCGGCCTTTAAAGGTATCCTGCACAACCTGTAGTATAAAAG  
>HPV23\_Beta\_1020186\_nt6801\_L1\_Tile\_rc|1  
CATGGCATTAAATTTGTGTTAAGACCTCGGCCTTTAAAGGTATCCTGCACAACCTGTAGTAT  
>HPV23\_Beta\_1020186\_nt6896\_L1\_Tile\_rc|1  
GTGGCCTTTGAAGCCAAATATCTGTATGTGTCATGAACCTGCATTATCTGGTGTAGGAACA  
>HPV23\_Beta\_1020186\_nt6926\_L1\_Tile\_rc|1  
TGCGTGTTCAGTACTGCATCTGGACATTTTGTGGCCTTTGAAGCCAAATATCTGTATGTG  
>HPV23\_Beta\_1020186\_nt6936\_L1\_Tile\_rc|1  
ATCCTCTTTTTGCGTGTTCAGGACTGCATCTGGACATTTTGTGGCCTTTGAAGCCAAATA  
>HPV23\_Beta\_1020186\_nt7021\_L1\_Tile\_rc|1  
ACTTACGGCCTAAGGGATATTGATCTAGGTCTAGAGACAATTTTCTGTTCATATCAACAT  
>HPV23\_Beta\_1020186\_nt7026\_L1\_Tile\_rc|1  
CAGAACTTACGGCCTAAGGGATATTGATCTAGGTCTAGAGACAATTTTCTGTTCATATC  
>HPV23\_Beta\_1020186\_nt7041\_L1\_Tile\_rc|1  
CACTCCAATTTGAAACAGAACTTACGGCCTAAGGGATATTGATCTAGGTCTAGAGACAA  
>HPV23\_Beta\_1020186\_nt7051\_L1\_Tile\_rc|1  
GTACACGCTGCACTCCAATTTGAAACAGAACTTACGGCCTAAGGGATATTGATCTAGGT  
>HPV23\_Beta\_1020186\_nt7061\_L1\_Tile\_rc|1  
GTACCGGACCGTACACGCTGCACTCCAATTTGAAACAGAACTTACGGCCTAAGGGATAT  
>HPV23\_Beta\_1020186\_nt7066\_L1\_Tile\_rc|1  
GTTTGGTACCGGACCGTACACGCTGCACTCCAATTTGAAACAGAACTTACGGCCTAAGG  
>HPV23\_Beta\_1020186\_nt7086\_L1\_Tile\_rc|1  
CACTTTTCGAGTTGCAGGCCGTTTGGTACCGGACCGTACACGCTGCACTCCAATTTGAAA  
>HPV23\_Beta\_1020186\_nt7096\_L1\_Tile\_rc|1  
CAGTTTGGTCACTTTTCGAGTTGCAGGCCGTTTGGTACCGGACCGTACACGCTGCACTC  
>HPV23\_Beta\_1020186\_nt7106\_L1\_Tile\_rc|1  
TTCCTTTTGACAGTTTGGTCACTTTTCGAGTTGCAGGCCGTTTGGTACCGGACCGTACA  
>HPV23\_Beta\_1020186\_nt7111\_L1\_Tile\_rc|1  
CTTTTTTCCTTTTGACAGTTTGGTCACTTTTCGAGTTGCAGGCCGTTTGGTACCGGACC  
>HPV23\_Beta\_1020186\_nt7116\_L1\_Tile\_rc|1  
TTGCACTTTTTCCTTTTGACAGTTTGGTCACTTTTCGAGTTGCAGGCCGTTTGGTACC  
>HPV23\_Beta\_1020186\_nt7122\_L1\_Tile\_rc|2  
TTACAATTGCACTTTTTTCCTTTTGACAGTTTGGTCACTTTTCGAGTTGCAGGCCGTTT  
>HPV24\_Unclassified\_9628486\_nt6079\_L1\_Tile\_rc|1  
GACGATGCTTGTGTCCTATATGATACAGGGTTTTCTGTGTCATTCACCTTTGTTAAATAAT  
>HPV24\_Unclassified\_9628486\_nt6089\_L1\_Tile\_rc|1  
ATCATCTGTGGACGATGCTTGTGTCCTATATGATACAGGGTTTTCTGTGTCATTCACCTT  
>HPV24\_Unclassified\_9628486\_nt6094\_L1\_Tile\_rc|1  
TGTCTATCATCTGTGGACGATGCTTGTGTCCTATATGATACAGGGTTTTCTGTGTCATTC  
>HPV24\_Unclassified\_9628486\_nt6104\_L1\_Tile\_rc|1  
TGAGGTATTTTGTCTATCATCTGTGGACGATGCTTGTGTCCTATATGATACAGGGTTTTCT  
>HPV24\_Unclassified\_9628486\_nt6204\_L1\_Tile\_rc|1  
CATCATTATTATCACCAGCACACCTCTCAGCTACTTCCCAATGTTCTCCTATGCAGGGTG  
>HPV24\_Unclassified\_9628486\_nt6209\_L1\_Tile\_rc|1  
ACCAGCATCATTATTATCACCAGCACACCTCTCAGCTACTTCCCAATGTTCTCCTATGCA  
>HPV24\_Unclassified\_9628486\_nt6214\_L1\_Tile\_rc|1  
CATCTACCAGCATCATTATTATCACCAGCACACCTCTCAGCTACTTCCCAATGTTCTCCT  
>HPV24\_Unclassified\_9628486\_nt6234\_L1\_Tile\_rc|1  
TTACTAACTTAATAGGTGGACATCTACCAGCATCATTATTATCACCAGCACACCTCTCAG  
>HPV24\_Unclassified\_9628486\_nt6244\_L1\_Tile\_rc|1  
ATTACTGAATTTACTAACTTAATAGGTGGACATCTACCAGCATCATTATTATCACCAGCA  
>HPV24\_Unclassified\_9628486\_nt6249\_L1\_Tile\_rc|1  
CTTGAATTACTGAATTTACTAACTTAATAGGTGGACATCTACCAGCATCATTATTATCAC  
>HPV24\_Unclassified\_9628486\_nt6254\_L1\_Tile\_rc|1

ACCATCTTGAATTACTGAATTTACTAACTTAATAGGTGGACATCTACCAGCATCATTATT  
>HPV24\_Unclassified\_9628486\_nt6324\_L1\_Tile\_rc|1  
AACTTACGTCTGATCTACTTTGTTGTAGTGTTCTAAAATTTAAATTCCCATAACCAATAT  
>HPV24\_Unclassified\_9628486\_nt6329\_L1\_Tile\_rc|1  
ATCCAAACTTACGTCTGATCTACTTTGTTGTAGTGTTCTAAAATTTAAATTCCCATAACC  
>HPV24\_Unclassified\_9628486\_nt6334\_L1\_Tile\_rc|1  
ACAATATCCAAACTTACGTCTGATCTACTTTGTTGTAGTGTTCTAAAATTTAAATTCCCA  
>HPV24\_Unclassified\_9628486\_nt6339\_L1\_Tile\_rc|1  
CATTTACAATATCCAAACTTACGTCTGATCTACTTTGTTGTAGTGTTCTAAAATTTAAAT  
>HPV24\_Unclassified\_9628486\_nt6344\_L1\_Tile\_rc|1  
GGTTTCATTTACAATATCCAAACTTACGTCTGATCTACTTTGTTGTAGTGTTCTAAAAT  
>HPV24\_Unclassified\_9628486\_nt6514\_L1\_Tile\_rc|1  
AAGTCATTTTTGTAGGTCCCTGCATCAATTTGCTCACCAGGTATGTCATCCCCTGGTTTA  
>HPV24\_Unclassified\_9628486\_nt6739\_L1\_Tile\_rc|1  
GTGTATACACTTATACTAAAATTGGTGTTCCTGGTGTTATCTACTACCGTAATGAACAAT  
>HPV24\_Unclassified\_9628486\_nt6774\_L1\_Tile\_rc|1  
CATACTCGTTAATATCTGTTACTTTGCCATTTTCAGTGTATACACTTATACTAAAATTGG  
>HPV24\_Unclassified\_9628486\_nt6779\_L1\_Tile\_rc|1  
AGCATCATACTCGTTAATATCTGTTACTTTGCCATTTTCAGTGTATACACTTATACTAAA  
>HPV24\_Unclassified\_9628486\_nt6784\_L1\_Tile\_rc|1  
TTATTAGCATCATACTCGTTAATATCTGTTACTTTGCCATTTTCAGTGTATACACTTATA  
>HPV24\_Unclassified\_9628486\_nt6794\_L1\_Tile\_rc|1  
TTCCCTAAAATTTATTAGCATCATACTCGTTAATATCTGTTACTTTGCCATTTTCAGTGTA  
>HPV24\_Unclassified\_9628486\_nt6799\_L1\_Tile\_rc|1  
TGATATTCCCTAAATTTATTAGCATCATACTCGTTAATATCTGTTACTTTGCCATTTTCA  
>HPV24\_Unclassified\_9628486\_nt6804\_L1\_Tile\_rc|1  
GTCTCTGATATTCCCTAAATTTATTAGCATCATACTCGTTAATATCTGTTACTTTGCCAT  
>HPV24\_Unclassified\_9628486\_nt6809\_L1\_Tile\_rc|1  
TACATGTCTCTGATATTCCCTAAATTTATTAGCATCATACTCGTTAATATCTGTTACTTT  
>HPV24\_Unclassified\_9628486\_nt6839\_L1\_Tile\_rc|1  
CTGCAGTATAAGTGAAATTTTCACTCTTCTACATGTCTCTGATATTCCCTAAATTTATT  
>HPV24\_Unclassified\_9628486\_nt6844\_L1\_Tile\_rc|1  
CATAGCTGCAGTATAAGTGAAATTTTCACTCTTCTACATGTCTCTGATATTCCCTAAAT  
>HPV24\_Unclassified\_9628486\_nt6854\_L1\_Tile\_rc|1  
AGGGATTTTACATAGCTGCAGTATAAGTGAAATTTTCACTCTTCTACATGTCTCTGATA  
>HPV24\_Unclassified\_9628486\_nt6864\_L1\_Tile\_rc|1  
CTGCTTTTAAAGGGATTTTACATAGCTGCAGTATAAGTGAAATTTTCACTCTTCTACAT  
>HPV24\_Unclassified\_9628486\_nt6869\_L1\_Tile\_rc|1  
CACATCTGCTTTTAAAGGGATTTTACATAGCTGCAGTATAAGTGAAATTTTCACTCTTC  
>HPV24\_Unclassified\_9628486\_nt6884\_L1\_Tile\_rc|1  
ATTGATCTGTGCTAACACATCTGCTTTTAAAGGGATTTTACATAGCTGCAGTATAAGTGA  
>HPV24\_Unclassified\_9628486\_nt6904\_L1\_Tile\_rc|1  
AATAGAGATGGATTCATAGCATTGATCTGTGCTAACACATCTGCTTTTAAAGGGATTTTA  
>HPV24\_Unclassified\_9628486\_nt6989\_L1\_Tile\_rc|1  
AGGTGTTGCCAAACTTTCTATATATCTGTAGGTACTTTGAAGAGGATTGTCTGGTGCAGG  
>HPV24\_Unclassified\_9628486\_nt6994\_L1\_Tile\_rc|1  
GGACAAGGTGTTGCCAAACTTTCTATATATCTGTAGGTACTTTGAAGAGGATTGTCTGGT  
>HPV24\_Unclassified\_9628486\_nt7119\_L1\_Tile\_rc|1  
GAAACAGGAACTTTCGTCCCTAAGGAATATTGATCCAGTTCCAAAGATAAGCGTTCAGATA  
>HPV24\_Unclassified\_9628486\_nt7149\_L1\_Tile\_rc|1  
TTTTAGATGTTTTTTGTACAAGACCCGCTTGAAACAGGAACTTTCGTCCCTAAGGAATATT  
>HPV24\_Unclassified\_9628486\_nt7154\_L1\_Tile\_rc|1  
TGTTTTTTTTAGATGTTTTTTGTACAAGACCCGCTTGAAACAGGAACTTTCGTCCCTAAGGA  
>HPV24\_Unclassified\_9628486\_nt7159\_L1\_Tile\_rc|1  
TTAGATGTTTTTTTTAGATGTTTTTTGTACAAGACCCGCTTGAAACAGGAACTTTCGTCCCT

>HPV24\_Unclassified\_9628486\_nt7164\_L1\_Tile\_rc|1  
ATACATTAGATGTTTTTTTAGATGTTTTTTGTACAAGACCCGCTTGAAACAGGAACTTTC  
>HPV24\_Unclassified\_9628486\_nt7169\_L1\_Tile\_rc|1  
CTTGGATACATTAGATGTTTTTTTAGATGTTTTTTGTACAAGACCCGCTTGAAACAGGAA  
>HPV24\_Unclassified\_9628486\_nt7174\_L1\_Tile\_rc|1  
GTCCCCCTTGGATACATTAGATGTTTTTTTAGATGTTTTTTGTACAAGACCCGCTTGAAAC  
>HPV24\_Unclassified\_9628486\_nt7179\_L1\_Tile\_rc|1  
GTTTGGTCCCCCTTGGATACATTAGATGTTTTTTTAGATGTTTTTTGTACAAGACCCGCTT  
>HPV24\_Unclassified\_9628486\_nt7184\_L1\_Tile\_rc|1  
TTTTCGTTTTGGTCCCCCTTGGATACATTAGATGTTTTTTTAGATGTTTTTTGTACAAGACC  
>HPV24\_Unclassified\_9628486\_nt7193\_L1\_Tile\_rc|1  
TTACGTGCGTTTTCTGTTTGGTCCCCCTTGGATACATTAGATGTTTTTTTAGATGTTTTTTG  
>HPV25\_Beta\_396948\_nt6030\_L1\_Tile\_rc|1  
GACACTTTTGGAAATTTGCAATTTAGAGCCTTGGACGTTGTACACATTAAATATGGGTGA  
>HPV25\_Beta\_396948\_nt6035\_L1\_Tile\_rc|1  
TTCCTGACACTTTTGGAAATTTGCAATTTAGAGCCTTGGACGTTGTACACATTAAATATG  
>HPV25\_Beta\_396948\_nt6040\_L1\_Tile\_rc|1  
TTGATTTCTGACACTTTTGGAAATTTGCAATTTAGAGCCTTGGACGTTGTACACATTAAA  
>HPV25\_Beta\_396948\_nt6245\_L1\_Tile\_rc|1  
TAGCTTTATAAGAATTTGGATTTCTGTGTCGCCAACCTTGTTAAACAATGGGTGACCCA  
>HPV25\_Beta\_396948\_nt6250\_L1\_Tile\_rc|1  
AGAAGTAGCTTTATAAGAATTTGGATTTTCTGTGTCGCCAACCTTGTTAAACAATGGGTG  
>HPV25\_Beta\_396948\_nt6255\_L1\_Tile\_rc|1  
TCTGTAGAACTAGCTTTATAAGAATTTGGATTTTCTGTGTCGCCAACCTTGTTAAACAAT  
>HPV25\_Beta\_396948\_nt6275\_L1\_Tile\_rc|1  
ATGATACATTTTGCCTGTCTGTAGAACTAGCTTTATAAGAATTTGGATTTTCTGTGT  
>HPV25\_Beta\_396948\_nt6280\_L1\_Tile\_rc|1  
GTCAAATGATACATTTTGCCTGTCTGTAGAACTAGCTTTATAAGAATTTGGATTTTCT  
>HPV25\_Beta\_396948\_nt6415\_L1\_Tile\_rc|1  
AATGACAGAATTAATTAATTCTATTGGAGGGCATGACCCTTGTTGAATATTGCCATCATC  
>HPV25\_Beta\_396948\_nt6735\_L1\_Tile\_rc|1  
GAGTTACCTAGATTATTATATTGAGCCTGACTACTGTTAGGTGGTATGTAAAATGCATTT  
>HPV25\_Beta\_396948\_nt6740\_L1\_Tile\_rc|1  
ACATTGAGTTACCTAGATTATTATATTGAGCCTGACTACTGTTAGGTGGTATGTAAAATG  
>HPV25\_Beta\_396948\_nt6975\_L1\_Tile\_rc|1  
CTCAAATATTCTGTAAATTTTTGAGAATTATAATCAGTGATTTTGGAAACATCTGTTCCA  
>HPV25\_Beta\_396948\_nt6980\_L1\_Tile\_rc|1  
CATGTCTCAAAATATTCTGTAAATTTTTGAGAATTATAATCAGTGATTTTGGAAACATCTG  
>HPV25\_Beta\_396948\_nt7030\_L1\_Tile\_rc|1  
CAACGGTACTTTGCAAAGTTGTAATATTAATGATAACTCATATTCTTCTACATGTCTCAA  
>HPV25\_Beta\_396948\_nt7035\_L1\_Tile\_rc|1  
GCCTTCAACGGTACTTTGCAAAGTTGTAATATTAATGATAACTCATATTCTTCTACATGT  
>HPV25\_Beta\_396948\_nt7040\_L1\_Tile\_rc|1  
TTTCTGCCTTCAACGGTACTTTGCAAAGTTGTAATATTAATGATAACTCATATTCTTCTA  
>HPV25\_Beta\_396948\_nt7045\_L1\_Tile\_rc|1  
CAATATTTCTGCCTTCAACGGTACTTTGCAAAGTTGTAATATTAATGATAACTCATATTC  
>HPV25\_Beta\_396948\_nt7050\_L1\_Tile\_rc|1  
TGAGCCAATATTTCTGCCTTCAACGGTACTTTGCAAAGTTGTAATATTAATGATAACTCA  
>HPV25\_Beta\_396948\_nt7065\_L1\_Tile\_rc|1  
TTCATTGCATTAATCTGAGCCAATATTTCTGCCTTCAACGGTACTTTGCAAAGTTGTAAT  
>HPV25\_Beta\_396948\_nt7070\_L1\_Tile\_rc|1  
TGGAATTCATTGCATTAATCTGAGCCAATATTTCTGCCTTCAACGGTACTTTGCAAAGTT  
>HPV25\_Beta\_396948\_nt7075\_L1\_Tile\_rc|1  
AATGTTGGAATTCATTGCATTAATCTGAGCCAATATTTCTGCCTTCAACGGTACTTTGCA  
>HPV25\_Beta\_396948\_nt7080\_L1\_Tile\_rc|1

TCTAAAATGTTGGAATTCATTGCATTAATCTGAGCCAATATTTCTGCCTTCAACGGTACT  
>HPV25\_Beta\_396948\_nt7165\_L1\_Tile\_rc|1  
ACAACGTGTGGCTAAAGAATCAATGTAGCGATAAGTATCCTGAATAGAATTGTCCGGTGC  
>HPV25\_Beta\_396948\_nt7170\_L1\_Tile\_rc|1  
TCTGGACAACGTGTGGCTAAAGAATCAATGTAGCGATAAGTATCCTGAATAGAATTGTCC  
>HPV25\_Beta\_396948\_nt7175\_L1\_Tile\_rc|1  
TTTTATCTGGACAACGTGTGGCTAAAGAATCAATGTAGCGATAAGTATCCTGAATAGAAT  
>HPV25\_Beta\_396948\_nt7180\_L1\_Tile\_rc|1  
AGGATTTTTATCTGGACAACGTGTGGCTAAAGAATCAATGTAGCGATAAGTATCCTGAAT  
>HPV25\_Beta\_396948\_nt7384\_L1\_Tile\_rc|1  
CTAATTTTTACGTTTTCTTTTTATTCCCTAGTAGATATTCGGGAGGAACTGTTTTTGT  
>HPV26\_Alpha\_9627305\_nt5944\_L1\_Tile\_rc|1  
CTGCATTTACAGTAGCCAAATGAGAGTTTTTCGGTATCATCCAACCTATTAAACAAAGGAT  
>HPV26\_Alpha\_9627305\_nt5954\_L1\_Tile\_rc|1  
TTGTCACTGTCTGCATTTACAGTAGCCAAATGAGAGTTTTTCGGTATCATCCAACCTATTA  
>HPV26\_Alpha\_9627305\_nt5959\_L1\_Tile\_rc|1  
CCCTGTTGTCACTGTCTGCATTTACAGTAGCCAAATGAGAGTTTTTCGGTATCATCCAAC  
>HPV26\_Alpha\_9627305\_nt5964\_L1\_Tile\_rc|1  
ATTGTCCCTGTTGTCACTGTCTGCATTTACAGTAGCCAAATGAGAGTTTTTCGGTATCATC  
>HPV26\_Alpha\_9627305\_nt5969\_L1\_Tile\_rc|1  
GAAACATTGTCCCTGTTGTCACTGTCTGCATTTACAGTAGCCAAATGAGAGTTTTTCGGTA  
>HPV26\_Alpha\_9627305\_nt5974\_L1\_Tile\_rc|1  
CAACTGAAACATTGTCCCTGTTGTCACTGTCTGCATTTACAGTAGCCAAATGAGAGTTTT  
>HPV26\_Alpha\_9627305\_nt5979\_L1\_Tile\_rc|1  
ATTATCAACTGAAACATTGTCCCTGTTGTCACTGTCTGCATTTACAGTAGCCAAATGAGA  
>HPV26\_Alpha\_9627305\_nt6059\_L1\_Tile\_rc|1  
GTATTTTTACATATAGTGCCAATACCCCAGTGCTCTCCCAAGGGCGGTGTACAACCTATA  
>HPV26\_Alpha\_9627305\_nt6094\_L1\_Tile\_rc|1  
ATTCTAAGGGGGGGCAATCCCCACGTTGTGTCTGTGTATTTTTACATATAGTGCCAATAC  
>HPV26\_Alpha\_9627305\_nt6099\_L1\_Tile\_rc|1  
AATTAATTCTAAGGGGGGGCAATCCCCACGTTGTGTCTGTGTATTTTTACATATAGTGCC  
>HPV26\_Alpha\_9627305\_nt6104\_L1\_Tile\_rc|1  
CTGGAAATTAATTCTAAGGGGGGGCAATCCCCACGTTGTGTCTGTGTATTTTTACATATA  
>HPV26\_Alpha\_9627305\_nt6109\_L1\_Tile\_rc|1  
TAATGCTGGAAATTAATTCTAAGGGGGGGCAATCCCCACGTTGTGTCTGTGTATTTTTAC  
>HPV26\_Alpha\_9627305\_nt6114\_L1\_Tile\_rc|1  
CTCAATAATGCTGGAAATTAATTCTAAGGGGGGGCAATCCCCACGTTGTGTCTGTGTATT  
>HPV26\_Alpha\_9627305\_nt6354\_L1\_Tile\_rc|1  
ATACAAAGTGTTGGGTATAGCATCCCCAACAGCCCCCGCCTTATTATAAAAATGTCTGGC  
>HPV26\_Alpha\_9627305\_nt6359\_L1\_Tile\_rc|1  
TTAATATACAAAGTGTTGGGTATAGCATCCCCAACAGCCCCCGCCTTATTATAAAAATGT  
>HPV26\_Alpha\_9627305\_nt6364\_L1\_Tile\_rc|1  
CACCTTTAATATACAAAGTGTTGGGTATAGCATCCCCAACAGCCCCCGCCTTATTATAAA  
>HPV26\_Alpha\_9627305\_nt6369\_L1\_Tile\_rc|1  
TTCAGCACCTTTAATATACAAAGTGTTGGGTATAGCATCCCCAACAGCCCCCGCCTTATT  
>HPV26\_Alpha\_9627305\_nt6379\_L1\_Tile\_rc|1  
CCCTGCCTGATTACAGCACCTTTAATATACAAAGTGTTGGGTATAGCATCCCCAACAGCCC  
>HPV26\_Alpha\_9627305\_nt6389\_L1\_Tile\_rc|1  
GTAGGGGGCTCCCTGCCTGATTACAGCACCTTTAATATACAAAGTGTTGGGTATAGCATCC  
>HPV26\_Alpha\_9627305\_nt6399\_L1\_Tile\_rc|1  
AATAGAAGATGTAGGGGGCTCCCTGCCTGATTACAGCACCTTTAATATACAAAGTGTTGGG  
>HPV26\_Alpha\_9627305\_nt6404\_L1\_Tile\_rc|1  
GAATAAATAGAAGATGTAGGGGGCTCCCTGCCTGATTACAGCACCTTTAATATACAAAGTG  
>HPV26\_Alpha\_9627305\_nt6409\_L1\_Tile\_rc|1  
TAGCAGAATAAATAGAAGATGTAGGGGGCTCCCTGCCTGATTACAGCACCTTTAATATACA

>HPV26\_Alpha\_9627305\_nt6414\_L1\_Tile\_rc|1  
AGGTGTAGCAGAATAAATAGAAGATGTAGGGGGCTCCCTGCCTGATTAGCACCTTTAAT  
>HPV26\_Alpha\_9627305\_nt6719\_L1\_Tile\_rc|1  
GCATTCATTAAATGTATGTAAGCCATAACATCTGTTGTAAGTGTTATTTTACACAACTGA  
>HPV26\_Alpha\_9627305\_nt6724\_L1\_Tile\_rc|1  
TGGAGGCATTCATTAAATGTATGTAAGCCATAACATCTGTTGTAAGTGTTATTTTACACA  
>HPV26\_Alpha\_9627305\_nt6729\_L1\_Tile\_rc|1  
CAATATGGAGGCATTCATTAAATGTATGTAAGCCATAACATCTGTTGTAAGTGTTATTTT  
>HPV26\_Alpha\_9627305\_nt6739\_L1\_Tile\_rc|1  
TCCAATCCTCCAATATGGAGGCATTCATTAAATGTATGTAAGCCATAACATCTGTTGTAA  
>HPV26\_Alpha\_9627305\_nt6759\_L1\_Tile\_rc|1  
AGGTAAGGTTAGTCCAAAATTCCAATCCTCCAATATGGAGGCATTCATTAAATGTATGTA  
>HPV26\_Alpha\_9627305\_nt6974\_L1\_Tile\_rc|1  
CCTAGTTTCGGCCGCCGTTGTATGCCGGCCTGTAACATAAACTTACGCCCTAGTGGAAT  
>HPV26\_Alpha\_9627305\_nt6979\_L1\_Tile\_rc|1  
TGGTGCCTAGTTTCGGCCGCCGTTGTATGCCGGCCTGTAACATAAACTTACGCCCTAGTG  
>HPV26\_Alpha\_9627305\_nt6984\_L1\_Tile\_rc|1  
ACGTTTGGTGCCTAGTTTCGGCCGCCGTTGTATGCCGGCCTGTAACATAAACTTACGCCC  
>HPV26\_Alpha\_9627305\_nt6989\_L1\_Tile\_rc|1  
AAGGGACGTTTGGTGCCTAGTTTCGGCCGCCGTTGTATGCCGGCCTGTAACATAAACTTA  
>HPV26\_Alpha\_9627305\_nt6994\_L1\_Tile\_rc|1  
AAGATAAGGGACGTTTGGTGCCTAGTTTCGGCCGCCGTTGTATGCCGGCCTGTAACATAA  
>HPV27\_Alpha\_396964\_nt5458\_L1\_Tile\_rc|1  
GGTATTAGCCAGGGAGCCGCGAGGGGCTGGGTAGTAATCGTCCAATGGCTGCAGGACATC  
>HPV27\_Alpha\_396964\_nt5468\_L1\_Tile\_rc|1  
CAGATACCGTGGTATTAGCCAGGGAGCCGCGAGGGGCTGGGTAGTAATCGTCCAATGGCT  
>HPV27\_Alpha\_396964\_nt5483\_L1\_Tile\_rc|1  
TAGATGCAGAGGAGGCAGATACCGTGGTATTAGCCAGGGAGCCGCGAGGGGCTGGGTAGT  
>HPV27\_Alpha\_396964\_nt5513\_L1\_Tile\_rc|1  
AGAGAGGGGCTGTAGTGGACCCTCGCAGTGTAGATGCAGAGGAGGCAGATACCGTGGTAT  
>HPV27\_Alpha\_396964\_nt5903\_L1\_Tile\_rc|1  
GGACACCTTAGGCACTGCCAACCTATTATTGCTACCCTTCTTTATAGAATAATATGGGTG  
>HPV27\_Alpha\_396964\_nt5918\_L1\_Tile\_rc|1  
ACGGTATTGGTAGCCGGACACCTTAGGCACTGCCAACCTATTATTGCTACCCTTCTTTAT  
>HPV27\_Alpha\_396964\_nt5923\_L1\_Tile\_rc|1  
AATACACGGTATTGGTAGCCGGACACCTTAGGCACTGCCAACCTATTATTGCTACCCTTC  
>HPV27\_Alpha\_396964\_nt6763\_L1\_Tile\_rc|1  
GCTTTATAATTAGTATTATCAGACACCTCAGCTGCACACAGAGAGACATTGGTACTCCGT  
>HPV27\_Alpha\_396964\_nt6773\_L1\_Tile\_rc|1  
AAAATTTCGTAGCTTTATAATTAGTATTATCAGACACCTCAGCTGCACACAGAGAGACATT  
>HPV28\_Alpha\_1020202\_nt5881\_L1\_Tile\_rc|1  
GCGGACACTTTGGGCACATCTGCTTTGTTAGTGGATGATTTAGGAATGGGAAAATAAGGA  
>HPV28\_Alpha\_1020202\_nt5886\_L1\_Tile\_rc|1  
GAAAGGCGGACACTTTGGGCACATCTGCTTTGTTAGTGGATGATTTAGGAATGGGAAAAT  
>HPV28\_Alpha\_1020202\_nt5891\_L1\_Tile\_rc|1  
ATACTGAAAGGCGGACACTTTGGGCACATCTGCTTTGTTAGTGGATGATTTAGGAATGGG  
>HPV28\_Alpha\_1020202\_nt5901\_L1\_Tile\_rc|1  
GGAATACCTTATACTGAAAGGCGGACACTTTGGGCACATCTGCTTTGTTAGTGGATGATT  
>HPV28\_Alpha\_1020202\_nt6491\_L1\_Tile\_rc|1  
AATGGTGTCCCCAGCAACACCAGCTCTATTAAAAAATGCCGAGCGAAAAGTTGTTCCCTT  
>HPV28\_Alpha\_1020202\_nt6521\_L1\_Tile\_rc|1  
GCCCTGACCTTTAATATACAATGTTTCAGGAATGGTGTCCCCAGCAACACCAGCTCTATT  
>HPV28\_Alpha\_1020202\_nt6531\_L1\_Tile\_rc|1  
CCCTCCCGTTGCCCTGACCTTTAATATACAATGTTTCAGGAATGGTGTCCCCAGCAACAC  
>HPV28\_Alpha\_1020202\_nt6536\_L1\_Tile\_rc|1

CACATCCCTCCCGTTGCCCTGACCTTTAATATACAATGTTTCAGGAATGGTGTCCCCAGC  
>HPV28\_Alpha\_1020202\_nt6541\_L1\_Tile\_rc|1  
CCAATCACATCCCTCCCGTTGCCCTGACCTTTAATATACAATGTTTCAGGAATGGTGTCC  
>HPV28\_Alpha\_1020202\_nt6546\_L1\_Tile\_rc|1  
CACTACCAATCACATCCCTCCCGTTGCCCTGACCTTTAATATACAATGTTTCAGGAATGG  
>HPV28\_Alpha\_1020202\_nt6746\_L1\_Tile\_rc|1  
ATCGTACGTAGCTGAAGAGTCAGTAGAAACACACAACGTCATGTTTGTACTGCGTGTAGT  
>HPV28\_Alpha\_1020202\_nt6771\_L1\_Tile\_rc|1  
TTAAGTATTCCCTTAAATTTACTAGCATCGTACGTAGCTGAAGAGTCAGTAGAAACACACA  
>HPV28\_Alpha\_1020202\_nt6776\_L1\_Tile\_rc|1  
GTGCCTTAAGTATTCCCTTAAATTTACTAGCATCGTACGTAGCTGAAGAGTCAGTAGAAAC  
>HPV28\_Alpha\_1020202\_nt6791\_L1\_Tile\_rc|1  
ATCGTACTCCTCCCGTGCCTTAAGTATTCCCTTAAATTTACTAGCATCGTACGTAGCTGA  
>HPV28\_Alpha\_1020202\_nt6796\_L1\_Tile\_rc|1  
TGCAAATCGTACTCCTCCCGTGCCTTAAGTATTCCCTTAAATTTACTAGCATCGTACGTA  
>HPV28\_Alpha\_1020202\_nt7086\_L1\_Tile\_rc|1  
TTAAAAATTTCCCTTCCCAGAGGGAATTGCGATAGATCAAGAGAAAAGCGATCCTTAAGAT  
>HPV28\_Alpha\_1020202\_nt7106\_L1\_Tile\_rc|1  
GGCACCTACACCAACTGCATTAAAAATTTCCCTTCCCAGAGGGAATTGCGATAGATCAAG  
>HPV28\_Alpha\_1020202\_nt7156\_L1\_Tile\_rc|1  
GATCCTCTCGTGGTGGACGCTGGACGTTTGCGAACGGAGACACTGGAGCGGGCACCTACA  
>HPV28\_Alpha\_1020202\_nt7186\_L1\_Tile\_rc|1  
TTTTTGGCGCGTTTTTCGTTTTGCAGCAGACGATCCTCTCGTGGTGGACGCTGGACGTTTG  
>HPV29\_Alpha\_1020210\_nt6329\_L1\_Tile\_rc|1  
GTCATTAACTCCAGGGGGGGCAATCACCAGCAGCGGAAGTAGTGCGTGACACACAGTG  
>HPV29\_Alpha\_1020210\_nt6334\_L1\_Tile\_rc|1  
GTGTGGTCATTAATCCAGGGGGGGCAATCACCAGCAGCGGAAGTAGTGCGTGACACACA  
>HPV29\_Alpha\_1020210\_nt6339\_L1\_Tile\_rc|1  
AATATGTGTGGTCATTAATCCAGGGGGGGCAATCACCAGCAGCGGAAGTAGTGCGTGC  
>HPV29\_Alpha\_1020210\_nt6579\_L1\_Tile\_rc|1  
CAAGGAATCTGGGATTTTGTCCCCTACTACACCAGCACGATTAAAGAAGTGCCTGGCAAA  
>HPV29\_Alpha\_1020210\_nt6584\_L1\_Tile\_rc|1  
AAGTACAAGGAATCTGGGATTTTGTCCCCTACTACACCAGCACGATTAAAGAAGTGCCTG  
>HPV29\_Alpha\_1020210\_nt6594\_L1\_Tile\_rc|1  
GTTACCCCTTAAAGTACAAGGAATCTGGGATTTTGTCCCCTACTACACCAGCACGATTAAA  
>HPV29\_Alpha\_1020210\_nt6599\_L1\_Tile\_rc|1  
CCGTTGTTACCCTTTAAGTACAAGGAATCTGGGATTTTGTCCCCTACTACACCAGCACGA  
>HPV29\_Alpha\_1020210\_nt6604\_L1\_Tile\_rc|1  
CTCGCCCGTTGTTACCCTTTAAGTACAAGGAATCTGGGATTTTGTCCCCTACTACACCAG  
>HPV29\_Alpha\_1020210\_nt6609\_L1\_Tile\_rc|1  
AGTTTCTCGCCCGTTGTTACCCTTTAAGTACAAGGAATCTGGGATTTTGTCCCCTACTAC  
>HPV29\_Alpha\_1020210\_nt6614\_L1\_Tile\_rc|1  
CCAGGAGTTTCTCGCCCGTTGTTACCCTTTAAGTACAAGGAATCTGGGATTTTGTCCCCT  
>HPV29\_Alpha\_1020210\_nt6624\_L1\_Tile\_rc|1  
TATGGCACTGCCAGGAGTTTCTCGCCCGTTGTTACCCTTTAAGTACAAGGAATCTGGGAT  
>HPV29\_Alpha\_1020210\_nt6629\_L1\_Tile\_rc|1  
CTGTATATGGCACTGCCAGGAGTTTCTCGCCCGTTGTTACCCTTTAAGTACAAGGAATCT  
>HPV29\_Alpha\_1020210\_nt6829\_L1\_Tile\_rc|1  
TAGCATCATAAGTGGTCAACGGTTGAGACTCTGTGGTAGCACACAACGACATATTGGTGC  
>HPV29\_Alpha\_1020210\_nt6834\_L1\_Tile\_rc|1  
CTTGGTAGCATCATAAGTGGTCAACGGTTGAGACTCTGTGGTAGCACACAACGACATATT  
>HPV29\_Alpha\_1020210\_nt6844\_L1\_Tile\_rc|1  
ATTCTTTAATCTTGGTAGCATCATAAGTGGTCAACGGTTGAGACTCTGTGGTAGCACACA  
>HPV29\_Alpha\_1020210\_nt6849\_L1\_Tile\_rc|1  
CAAATATTCTTTAATCTTGGTAGCATCATAAGTGGTCAACGGTTGAGACTCTGTGGTAGC

>HPV29\_Alpha\_1020210\_nt6854\_L1\_Tile\_rc|1  
TGTCTCAAATATTCTTTAATCTTGGTAGCATCATAAGTGGTCAACGGTTGAGACTCTGTG  
>HPV29\_Alpha\_1020210\_nt6859\_L1\_Tile\_rc|1  
CCCCATGTCTCAAATATTCTTTAATCTTGGTAGCATCATAAGTGGTCAACGGTTGAGACT  
>HPV29\_Alpha\_1020210\_nt6959\_L1\_Tile\_rc|1  
TCTTCAAGTAAGGCACTGTTTCATAGTATGAAGGTAAGCCATAATTTTCAGGTGTCAATGTA  
>HPV29\_Alpha\_1020210\_nt6984\_L1\_Tile\_rc|1  
TGGCAATGTCAATCCAAAATTCCAGTCTTCAAGTAAGGCACTGTTTCATAGTATGAAGGTA  
>HPV29\_Alpha\_1020210\_nt7224\_L1\_Tile\_rc|1  
GGTGGTTCGTTTCGGCGCTTTCTGGAGGGGACTACTGAACGCCGGCGCGCACCGATCTGTAA  
>HPV29\_Alpha\_1020210\_nt7229\_L1\_Tile\_rc|1  
GCCGTGGTGGTTCGTTTCGGCGCTTTCTGGAGGGGACTACTGAACGCCGGCGCGCACCGATC  
>HPV29\_Alpha\_1020210\_nt7249\_L1\_Tile\_rc|1  
TTCGCTTTGCAGGGGTGGGGGCCGTGGTGGTTCGTTTCGGCGCTTTCTGGAGGGGACTACTG  
>HPV29\_Alpha\_1020210\_nt7254\_L1\_Tile\_rc|1  
GCGTTTTTCGCTTTCAGGGGTGGGGGCCGTGGTGGTTCGTTTCGGCGCTTTCTGGAGGGGAC  
>HPV29\_Alpha\_1020210\_nt7259\_L1\_Tile\_rc|1  
TTCGAGCGTTTTTCGCTTTCAGGGGTGGGGGCCGTGGTGGTTCGTTTCGGCGCTTTCTGGAG  
>HPV30\_Alpha\_396973\_L1\_Tile\_rc|1  
GTTTTTGGAAATTACCAGCCTTAGAAATAGAATAATATGGATGTCCAACAGCAAGCAAACGT  
>HPV30\_Alpha\_396973\_L1\_Tile\_rc|1  
CATCTGTTTTTGAATTACCAGCCTTAGAAATAGAATAATATGGATGTCCAACAGCAAGCA  
>HPV30\_Alpha\_396973\_nt6032\_L1\_Tile\_rc|1  
TGTTGTCCCTACTATCCTCTGCTGTATCCTGATTAGCTATAGTGGAACTTTCAGTGTCAAT  
>HPV30\_Alpha\_396973\_nt6037\_L1\_Tile\_rc|1  
AGAAATGTTGTCCCTACTATCCTCTGCTGTATCCTGATTAGCTATAGTGGAACTTTCAGT  
>HPV30\_Alpha\_396973\_nt6042\_L1\_Tile\_rc|2  
TCAACAGAAATGTTGTCCCTACTATCCTCTGCTGTATCCTGATTAGCTATAGTGGAACTT  
>HPV30\_Alpha\_396973\_nt6047\_L1\_Tile\_rc|1  
TTGGATCAACAGAAATGTTGTCCCTACTATCCTCTGCTGTATCCTGATTAGCTATAGTGG  
>HPV30\_Alpha\_396973\_nt6087\_L1\_Tile\_rc|1  
ATAGCAGGAGTGCACCCAATAATACACAATTGGGTTTGCTTTGGATCAACAGAAATGTTG  
>HPV30\_Alpha\_396973\_nt6092\_L1\_Tile\_rc|1  
CTCCTATAGCAGGAGTGCACCCAATAATACACAATTGGGTTTGCTTTGGATCAACAGAAA  
>HPV30\_Alpha\_396973\_nt6097\_L1\_Tile\_rc|1  
ATGTTCTCCTATAGCAGGAGTGCACCCAATAATACACAATTGGGTTTGCTTTGGATCAAC  
>HPV30\_Alpha\_396973\_nt6412\_L1\_Tile\_rc|1  
GCTAGGTAATTGTTTCACCAATAGCACCTGCCCTATTAAAGTAGTGCTAGCAAATAACTG  
>HPV30\_Alpha\_396973\_nt6447\_L1\_Tile\_rc|1  
GGATCCCTGTTATTTGTACCTTTTATATATAATGTGCTAGGTAATTGTTTCACCAATAGCA  
>HPV30\_Alpha\_396973\_nt6457\_L1\_Tile\_rc|1  
GCTTGGCGGGGGATCCCTGTTATTTGTACCTTTTATATATAATGTGCTAGGTAATTGTTTC  
>HPV30\_Alpha\_396973\_nt6462\_L1\_Tile\_rc|2  
ACTGAGCTTGGCGGGGGATCCCTGTTATTTGTACCTTTTATATATAATGTGCTAGGTAAT  
>HPV30\_Alpha\_396973\_nt6467\_L1\_Tile\_rc|1  
CATATACTGAGCTTGGCGGGGGATCCCTGTTATTTGTACCTTTTATATATAATGTGCTAG  
>HPV30\_Alpha\_396973\_nt6472\_L1\_Tile\_rc|1  
AGCAACATATACTGAGCTTGGCGGGGGATCCCTGTTATTTGTACCTTTTATATATAATGT  
>HPV30\_Alpha\_396973\_nt6482\_L1\_Tile\_rc|2  
CACTAGGAGTAGCAACATATACTGAGCTTGGCGGGGGATCCCTGTTATTTGTACCTTTTA  
>HPV30\_Alpha\_396973\_nt6822\_L1\_Tile\_rc|2  
GCAGCTGGGGGTGACAATCCAATATTCCAGCCCTCAAGTAAAGTGGAGTTCATAGTATGT  
>HPV30\_Alpha\_396973\_nt6832\_L1\_Tile\_rc|1  
TAAGCTTGTGGCAGCTGGGGGTGACAATCCAATATTCCAGCCCTCAAGTAAAGTGGAGTT  
>HPV30\_Alpha\_396973\_nt7022\_L1\_Tile\_rc|2

GTTTAGTACGAACCCCAAGTTGCATTAAAACTTTCTGCCCAGTGGGAATTGGTCAAGGT  
>HPV30\_Alpha\_396973\_nt7032\_L1\_Tile\_rc|1  
GTAGTAGAAGGTTTAGTACGAACCCCAAGTTGCATTAAAACTTTCTGCCCAGTGGGAAT  
>HPV30\_Alpha\_396973\_nt7077\_L1\_Tile\_rc|1  
GATGGTGTAGAGGTAGAGGAAGTGGGGGCCGAGCGTTTTTTTAGTAGTAGTAGAAGGTTTA  
>HPV30\_Alpha\_396973\_nt7092\_L1\_Tile\_rc|1  
CGCTTGCGTTTGGCTGATGGTGTAGAGGTAGAGGAAGTGGGGGCCGAGCGTTTTTTAGTA  
>HPV31\_Alpha\_333048\_nt5633\_L1\_Tile\_rc|1  
TGGCCTACTGTAAGCAGCCTAGCACTGCCTGCGTGATAATATATGTTGGTTCGTGTTACA  
>HPV31\_Alpha\_333048\_nt5668\_L1\_Tile\_rc|1  
TAGGATTGTCAGATTTAGGTATGGAATAATATGGATGGCCTACTGTAAGCAGCCTAGCAC  
>HPV31\_Alpha\_333048\_nt5673\_L1\_Tile\_rc|1  
TTTTTTTAGGATTGTCAGATTTAGGTATGGAATAATATGGATGGCCTACTGTAAGCAGCCT  
>HPV31\_Alpha\_333048\_nt5678\_L1\_Tile\_rc|1  
ACTATTTTTTTAGGATTGTCAGATTTAGGTATGGAATAATATGGATGGCCTACTGTAAGC  
>HPV31\_Alpha\_333048\_nt5683\_L1\_Tile\_rc|1  
GTACAACTATTTTTTTTAGGATTGTCAGATTTAGGTATGGAATAATATGGATGGCCTACTG  
>HPV31\_Alpha\_333048\_nt5688\_L1\_Tile\_rc|1  
CTTTGGTACAACCTATTTTTTTTAGGATTGTCAGATTTAGGTATGGAATAATATGGATGGCC  
>HPV31\_Alpha\_333048\_nt5693\_L1\_Tile\_rc|1  
GACACCTTTGGTACAACCTATTTTTTTTAGGATTGTCAGATTTAGGTATGGAATAATATGGA  
>HPV31\_Alpha\_333048\_nt5938\_L1\_Tile\_rc|1  
ATATACATTCCCTATTATCAGTGCCAGGACCACCGGCATATCTATTAGAGTTTTTCAGTGT  
>HPV31\_Alpha\_333048\_nt5943\_L1\_Tile\_rc|1  
CATTGATATACATTCCCTATTATCAGTGCCAGGACCACCGGCATATCTATTAGAGTTTTTC  
>HPV31\_Alpha\_333048\_nt6028\_L1\_Tile\_rc|1  
TGTTACTACAAGGACTACCTTTACCCCAATGCTCTCCAATAGGTGGTTTGCAACCAAGTA  
>HPV31\_Alpha\_333048\_nt6033\_L1\_Tile\_rc|1  
AGCATTGTTACTACAAGGACTACCTTTACCCCAATGCTCTCCAATAGGTGGTTTGCAACC  
>HPV31\_Alpha\_333048\_nt6038\_L1\_Tile\_rc|1  
GTAATAGCATTTGTTACTACAAGGACTACCTTTACCCCAATGCTCTCCAATAGGTGGTTTG  
>HPV31\_Alpha\_333048\_nt6043\_L1\_Tile\_rc|1  
CAGGGGTAATAGCATTTGTTACTACAAGGACTACCTTTACCCCAATGCTCTCCAATAGGTG  
>HPV31\_Alpha\_333048\_nt6063\_L1\_Tile\_rc|1  
TTCTAATGGAGGACAATCACCAGGGGTAATAGCATTTGTTACTACAAGGACTACCTTTACC  
>HPV31\_Alpha\_333048\_nt6338\_L1\_Tile\_rc|1  
CCGGAGCCTTTAATATATAAGTCAGTAGGGACCGATTACCAACCGTGCCTGATCTATTA  
>HPV31\_Alpha\_333048\_nt6353\_L1\_Tile\_rc|1  
AAAGTAGCTGTTGAACCGGAGCCTTTAATATATAAGTCAGTAGGGACCGATTACCAACC  
>HPV31\_Alpha\_333048\_nt6358\_L1\_Tile\_rc|1  
TAGCTAAAGTAGCTGTTGAACCGGAGCCTTTAATATATAAGTCAGTAGGGACCGATTAC  
>HPV31\_Alpha\_333048\_nt6368\_L1\_Tile\_rc|1  
TATGTACTGTTAGCTAAAGTAGCTGTTGAACCGGAGCCTTTAATATATAAGTCAGTAGGG  
>HPV31\_Alpha\_333048\_nt6373\_L1\_Tile\_rc|1  
GAAAGTATGTACTGTTAGCTAAAGTAGCTGTTGAACCGGAGCCTTTAATATATAAGTCAG  
>HPV31\_Alpha\_333048\_nt6378\_L1\_Tile\_rc|1  
TGTAGGAAAGTATGTACTGTTAGCTAAAGTAGCTGTTGAACCGGAGCCTTTAATATATAA  
>HPV31\_Alpha\_333048\_nt6383\_L1\_Tile\_rc|1  
CTAGGTGTAGGAAAGTATGTACTGTTAGCTAAAGTAGCTGTTGAACCGGAGCCTTTAATA  
>HPV31\_Alpha\_333048\_nt6393\_L1\_Tile\_rc|1  
CATGGAGCCGCTAGGTGTAGGAAAGTATGTACTGTTAGCTAAAGTAGCTGTTGAACCGGA  
>HPV31\_Alpha\_333048\_nt6398\_L1\_Tile\_rc|1  
GTAACCATGGAGCCGCTAGGTGTAGGAAAGTATGTACTGTTAGCTAAAGTAGCTGTTGAA  
>HPV31\_Alpha\_333048\_nt6403\_L1\_Tile\_rc|1  
CTGAAGTAACCATGGAGCCGCTAGGTGTAGGAAAGTATGTACTGTTAGCTAAAGTAGCTG



>HPV31\_Alpha\_333048\_nt6568\_L1\_Tile\_rc|1  
TACTTTTAAATGTAGTATCACTGTTTGCAATTGCAGCACAAACAGACATATTGGTACTAC  
>HPV31\_Alpha\_333048\_nt6573\_L1\_Tile\_rc|1  
ATTACTACTTTTAAATGTAGTATCACTGTTTGCAATTGCAGCACAAACAGACATATTGGT  
>HPV31\_Alpha\_333048\_nt6578\_L1\_Tile\_rc|1  
TTAAAATTACTACTTTTAAATGTAGTATCACTGTTTGCAATTGCAGCACAAACAGACATA  
>HPV31\_Alpha\_333048\_nt6588\_L1\_Tile\_rc|1  
TAAATACTCTTTAAAATTACTACTTTTAAATGTAGTATCACTGTTTGCAATTGCAGCACAA  
>HPV31\_Alpha\_333048\_nt6593\_L1\_Tile\_rc|1  
TGTCTTAAATACTCTTTAAAATTACTACTTTTAAATGTAGTATCACTGTTTGCAATTGCA  
>HPV31\_Alpha\_333048\_nt6768\_L1\_Tile\_rc|1  
CTGTGAGGTGACAAACCTATAGGTATCCTCCAAAGAACCTGAGGGAGGTGTGGTCAATCC  
>HPV31\_Alpha\_333048\_nt6828\_L1\_Tile\_rc|1  
ATAATCTTTAAATGGATCTTCCTTGGGCTTTTGGGGGGCAGTTTTTTGACATGTAATGGC  
>HPV31\_Alpha\_333048\_nt6948\_L1\_Tile\_rc|1  
TTTACCTGCTTTAAATTTAGGACGTGCCCTATATCCTGCCTGTAATAAAAAATTTGCGACC  
>HPV31\_Alpha\_333048\_nt6953\_L1\_Tile\_rc|1  
CTACGTTTACCTGCTTTAAATTTAGGACGTGCCCTATATCCTGCCTGTAATAAAAAATTTG  
>HPV31\_Alpha\_333048\_nt6958\_L1\_Tile\_rc|1  
GTGCACTACGTTTACCTGCTTTAAATTTAGGACGTGCCCTATATCCTGCCTGTAATAAAA  
>HPV31\_Alpha\_333048\_nt6963\_L1\_Tile\_rc|1  
TGAGGGTGCACCTACGTTTACCTGCTTTAAATTTAGGACGTGCCCTATATCCTGCCTGTAA  
>HPV31\_Alpha\_333048\_nt6973\_L1\_Tile\_rc|1  
TGGTAGATGCTGAGGGTGCACTACGTTTACCTGCTTTAAATTTAGGACGTGCCCTATATC  
>HPV31\_Alpha\_333048\_nt6983\_L1\_Tile\_rc|1  
GCTGGTGTAGTGGTAGATGCTGAGGGTGCACTACGTTTACCTGCTTTAAATTTAGGACGT  
>HPV31\_Alpha\_333048\_nt6988\_L1\_Tile\_rc|1  
GTTTTGCTGGTGTAGTGGTAGATGCTGAGGGTGCACTACGTTTACCTGCTTTAAATTTAG  
>HPV31\_Alpha\_333048\_nt7003\_L1\_Tile\_rc|1  
TTTTAGTTTTTTTACGTTTTGCTGGTGTAGTGGTAGATGCTGAGGGTGCACTACGTTTAC  
>HPV32\_Alpha\_9627327\_nt5988\_L1\_Tile\_rc|1  
TTCTATTGGGTGTCTTCTTAATAGTATAATATGGATGCCCAACAGCCAAAAGCCTAGAAC  
>HPV32\_Alpha\_9627327\_nt5993\_L1\_Tile\_rc|1  
AGATGTTCTATTGGGTGTCTTCTTAATAGTATAATATGGATGCCCAACAGCCAAAAGCCT  
>HPV32\_Alpha\_9627327\_nt5998\_L1\_Tile\_rc|1  
GGAATAGATGTTCTATTGGGTGTCTTCTTAATAGTATAATATGGATGCCCAACAGCCAAA  
>HPV32\_Alpha\_9627327\_nt6003\_L1\_Tile\_rc|1  
CCTTTGGAATAGATGTTCTATTGGGTGTCTTCTTAATAGTATAATATGGATGCCCAACAG  
>HPV32\_Alpha\_9627327\_nt6008\_L1\_Tile\_rc|1  
AGACACCTTTGGAATAGATGTTCTATTGGGTGTCTTCTTAATAGTATAATATGGATGCCC  
>HPV32\_Alpha\_9627327\_nt6013\_L1\_Tile\_rc|1  
AATCCAGACACCTTTGGAATAGATGTTCTATTGGGTGTCTTCTTAATAGTATAATATGGA  
>HPV32\_Alpha\_9627327\_nt6018\_L1\_Tile\_rc|1  
ACTGCAATCCAGACACCTTTGGAATAGATGTTCTATTGGGTGTCTTCTTAATAGTATAAT  
>HPV32\_Alpha\_9627327\_nt6023\_L1\_Tile\_rc|1  
TCTATACTGCAATCCAGACACCTTTGGAATAGATGTTCTATTGGGTGTCTTCTTAATAGT  
>HPV32\_Alpha\_9627327\_nt6038\_L1\_Tile\_rc|1  
CCTAACCCCTAAATACTCTATACTGCAATCCAGACACCTTTGGAATAGATGTTCTATTGGG  
>HPV32\_Alpha\_9627327\_nt6263\_L1\_Tile\_rc|1  
ACAATCCATAGATACATTTTCTCTATTATCAGTTCCAGGCCCTGCAGCATATCTAGGCCC  
>HPV32\_Alpha\_9627327\_nt6338\_L1\_Tile\_rc|1  
AGAGCAAGCAGCACCCCTTACCCCAATGCTCGCCAATGGCAGGTTTACAACCCACCAAACA  
>HPV32\_Alpha\_9627327\_nt6358\_L1\_Tile\_rc|1  
CAGTCGCCATTTGATTGTGCAGAGCAAGCAGCACCCCTTACCCCAATGCTCGCCAATGGCA  
>HPV32\_Alpha\_9627327\_nt6378\_L1\_Tile\_rc|1

TTTGTAATTCCAAAGGTGGGCAGTCGCCATTTGATTGTGCAGAGCAAGCAGCACCCCTTAC  
>HPV32\_Alpha\_9627327\_nt6453\_L1\_Tile\_rc|1  
TTGAAGTTTGCAAAGCACTAAAGTCCATTGCTCCAAACCCTACATCTGCCATATCACCAT  
>HPV32\_Alpha\_9627327\_nt6458\_L1\_Tile\_rc|1  
AGCTTTTGAAGTTTGCAAAGCACTAAAGTCCATTGCTCCAAACCCTACATCTGCCATATC  
>HPV32\_Alpha\_9627327\_nt6483\_L1\_Tile\_rc|1  
AGTTCATAATATCTAATGGCACCTCAGCTTTTGAAGTTTGCAAAGCACTAAAGTCCATTG  
>HPV32\_Alpha\_9627327\_nt6488\_L1\_Tile\_rc|1  
AATGGAGTTCATAATATCTAATGGCACCTCAGCTTTTGAAGTTTGCAAAGCACTAAAGTC  
>HPV32\_Alpha\_9627327\_nt6648\_L1\_Tile\_rc|1  
CATTAGAAGCTTTTATATACATGTCTCAGGAACAGGTTACCAAGGGTTCCTGCCCTAT  
>HPV32\_Alpha\_9627327\_nt6653\_L1\_Tile\_rc|1  
AGCACCATTAGAAGCTTTTATATACATGTCTCAGGAACAGGTTACCAAGGGTTCCTGC  
>HPV32\_Alpha\_9627327\_nt6658\_L1\_Tile\_rc|1  
CCAGAAGCACCATTAGAAGCTTTTATATACATGTCTCAGGAACAGGTTACCAAGGGTT  
>HPV32\_Alpha\_9627327\_nt6668\_L1\_Tile\_rc|1  
ATTATTTCTGCCAGAAGCACCATTAGAAGCTTTTATATACATGTCTCAGGAACAGGTT  
>HPV32\_Alpha\_9627327\_nt6673\_L1\_Tile\_rc|1  
GCTAAATTATTTCTGCCAGAAGCACCATTAGAAGCTTTTATATACATGTCTCAGGAACA  
>HPV32\_Alpha\_9627327\_nt6678\_L1\_Tile\_rc|1  
TACTAGCTAAATTATTTCTGCCAGAAGCACCATTAGAAGCTTTTATATACATGTCTCAG  
>HPV32\_Alpha\_9627327\_nt6683\_L1\_Tile\_rc|1  
AATACTACTAGCTAAATTATTTCTGCCAGAAGCACCATTAGAAGCTTTTATATACATGTC  
>HPV32\_Alpha\_9627327\_nt6888\_L1\_Tile\_rc|1  
AGTTAGTAGACTTGTATGTGTCTTCAGTTGTTACAGTAGCACACACAGTCATGTTAGTAC  
>HPV32\_Alpha\_9627327\_nt6893\_L1\_Tile\_rc|1  
CTTAAAGTTAGTAGACTTGTATGTGTCTTCAGTTGTTACAGTAGCACACACAGTCATGTT  
>HPV32\_Alpha\_9627327\_nt6898\_L1\_Tile\_rc|1  
TATTCCTTAAAGTTAGTAGACTTGTATGTGTCTTCAGTTGTTACAGTAGCACACACAGTC  
>HPV32\_Alpha\_9627327\_nt6903\_L1\_Tile\_rc|1  
GTAGATATTCCTTAAAGTTAGTAGACTTGTATGTGTCTTCAGTTGTTACAGTAGCACACA  
>HPV32\_Alpha\_9627327\_nt6908\_L1\_Tile\_rc|1  
ATGGCGTAGATATTCCTTAAAGTTAGTAGACTTGTATGTGTCTTCAGTTGTTACAGTAGC  
>HPV32\_Alpha\_9627327\_nt7008\_L1\_Tile\_rc|1  
CTAGTATGTCAGGATTCATGGTGTGGATATATGACATAACCTCTACAGATAATGTAATTT  
>HPV32\_Alpha\_9627327\_nt7038\_L1\_Tile\_rc|1  
GCGGTGGAGCTACACCAACATTCCAATCGTCTAGTATGTCAGGATTCATGGTGTGGATAT  
>HPV32\_Alpha\_9627327\_nt7113\_L1\_Tile\_rc|1  
GTGCTGTTACCTTAGCTTGACATCGTATGGCCTGAGACTGCACAAATCTATAACTATCTT  
>HPV32\_Alpha\_9627327\_nt7273\_L1\_Tile\_rc|1  
GATGCTGTTTCGTTTACTGCTGTAAGTTTAGGTCTTGACGTAACCCAGCTTGCAGTAAA  
>HPV32\_Alpha\_9627327\_nt7278\_L1\_Tile\_rc|1  
TGGAAGATGCTGTTTCGTTTACTGCTGTAAGTTTAGGTCTTGACGTAACCCAGCTTGCA  
>HPV32\_Alpha\_9627327\_nt7283\_L1\_Tile\_rc|1  
TTGACTGGAAGATGCTGTTTCGTTTACTGCTGTAAGTTTAGGTCTTGACGTAACCCAGC  
>HPV32\_Alpha\_9627327\_nt7288\_L1\_Tile\_rc|1  
GACTTTTGACTGGAAGATGCTGTTTCGTTTACTGCTGTAAGTTTAGGTCTTGACGTAAC  
>HPV32\_Alpha\_9627327\_nt7298\_L1\_Tile\_rc|1  
AGGAGAAGAAGACTTTTACTGGAAGATGCTGTTTCGTTTACTGCTGTAAGTTTAGGTCT  
>HPV32\_Alpha\_9627327\_nt7325\_L1\_Tile\_rc|1  
TTATTTACGTGTTTTCTGCGTTTTGCAGGAGAAGAAGACTTTTACTGGAAGATGCTGT  
>HPV33\_Alpha\_333049\_nt5725\_L1\_Tile\_rc|1  
GTACCAATAATTTTTAGCGTTAGTAGGATTTTTAATAGAAAAATATGGATGGCCAACAG  
>HPV33\_Alpha\_333049\_nt5730\_L1\_Tile\_rc|1  
TTTGGGTACCAATAATTTTTAGCGTTAGTAGGATTTTTAATAGAAAAATATGGATGGCC

>HPV33\_Alpha\_333049\_nt5735\_L1\_Tile\_rc|1  
GATACTTTGGGTACCAATAATTTTTTAGCGTTAGTAGGATTTTAAATAGAAAAATATGGA  
>HPV33\_Alpha\_333049\_nt5740\_L1\_Tile\_rc|1  
AGCCTGATACTTTGGGTACCAATAATTTTTTAGCGTTAGTAGGATTTTAAATAGAAAAAT  
>HPV33\_Alpha\_333049\_nt5745\_L1\_Tile\_rc|1  
TTGCAAGCCTGATACTTTGGGTACCAATAATTTTTTAGCGTTAGTAGGATTTTAAATAGA  
>HPV33\_Alpha\_333049\_nt5750\_L1\_Tile\_rc|1  
CTATATTGCAAGCCTGATACTTTGGGTACCAATAATTTTTTAGCGTTAGTAGGATTTTAA  
>HPV33\_Alpha\_333049\_nt6385\_L1\_Tile\_rc|1  
CAGTAGTTCTTGAACCTTTAATGTACAGGTCATCGGGAACAGCCTCTCCTAATGTACCAG  
>HPV33\_Alpha\_333049\_nt6390\_L1\_Tile\_rc|1  
AGAGGCAGTAGTTCCTGAACCTTTAATGTACAGGTCATCGGGAACAGCCTCTCCTAATGT  
>HPV33\_Alpha\_333049\_nt6395\_L1\_Tile\_rc|1  
TGAATAGAGGCAGTAGTTCCTGAACCTTTAATGTACAGGTCATCGGGAACAGCCTCTCCT  
>HPV33\_Alpha\_333049\_nt6400\_L1\_Tile\_rc|1  
TGCTTTGAATAGAGGCAGTAGTTCCTGAACCTTTAATGTACAGGTCATCGGGAACAGCCT  
>HPV33\_Alpha\_333049\_nt6405\_L1\_Tile\_rc|1  
AGCACTGCTTTGAATAGAGGCAGTAGTTCCTGAACCTTTAATGTACAGGTCATCGGGAAC  
>HPV33\_Alpha\_333049\_nt6865\_L1\_Tile\_rc|1  
TATATTTACCTAAGGGGTCTTCCTTTTCCTTTGGAGGTACTGTTTTTTGACACGTAATAG  
>HPV33\_Alpha\_333049\_nt6995\_L1\_Tile\_rc|1  
GTGGATGTGGGGCTGCACGTTTAAAGTTTAGGTTTTGCTTTAAGACCTGCCTGTAATAAA  
>HPV33\_Alpha\_333049\_nt7000\_L1\_Tile\_rc|1  
TGCGGGTGGATGTGGGGCTGCACGTTTAAAGTTTAGGTTTTGCTTTAAGACCTGCCTGTA  
>HPV33\_Alpha\_333049\_nt7010\_L1\_Tile\_rc|1  
GCAGACGATGTGCGGGTGGATGTGGGGCTGCACGTTTAAAGTTTAGGTTTTGCTTTAAGA  
>HPV34\_Alpha\_9627334\_nt5616\_L1\_Tile\_rc|1  
TTCCCATAGTATCCTTTATAGGATAATAGGGATGTCCTACTGCCAGCAAGCGTGTA  
>HPV34\_Alpha\_9627334\_nt5626\_L1\_Tile\_rc|1  
AATCTTACGTTTCCCATAGTATCCTTTATAGGATAATAGGGATGTCCTACTGCCAGCAA  
>HPV34\_Alpha\_9627334\_nt5631\_L1\_Tile\_rc|1  
ACAGCAATCTTACGTTTCCCATAGTATCCTTTATAGGATAATAGGGATGTCCTACTGCC  
>HPV34\_Alpha\_9627334\_nt5636\_L1\_Tile\_rc|1  
TAGGTACAGCAATCTTACGTTTCCCATAGTATCCTTTATAGGATAATAGGGATGTCCTA  
>HPV34\_Alpha\_9627334\_nt5646\_L1\_Tile\_rc|1  
CCTGAAACTTTAGGTACAGCAATCTTACGTTTCCCATAGTATCCTTTATAGGATAATAG  
>HPV34\_Alpha\_9627334\_nt5866\_L1\_Tile\_rc|1  
TATGTTTCCACCAATATATTTTGCAGCATTTTCAGTATCCTCAAGTTTATTCATAAAAGG  
>HPV34\_Alpha\_9627334\_nt5876\_L1\_Tile\_rc|1  
TACTATCTGCTATGTTTCCACCAATATATTTTGCAGCATTTTCAGTATCCTCAAGTTTAT  
>HPV34\_Alpha\_9627334\_nt5881\_L1\_Tile\_rc|1  
CTCCCTACTATCTGCTATGTTTCCACCAATATATTTTGCAGCATTTTCAGTATCCTCAAG  
>HPV34\_Alpha\_9627334\_nt5886\_L1\_Tile\_rc|1  
ATACACTCCCTACTATCTGCTATGTTTCCACCAATATATTTTGCAGCATTTTCAGTATCC  
>HPV34\_Alpha\_9627334\_nt5901\_L1\_Tile\_rc|1  
TTATAATCTACTGACATACACTCCCTACTATCTGCTATGTTTCCACCAATATATTTTGCA  
>HPV34\_Alpha\_9627334\_nt6011\_L1\_Tile\_rc|1  
TTAATTCAAGCGGAGGACATTCCCCAGCATTTTGGGTACCACATGGTGTGCCTGTACCCC  
>HPV34\_Alpha\_9627334\_nt6016\_L1\_Tile\_rc|1  
GTTCTTTAATTCAAGCGGAGGACATTCCCCAGCATTTTGGGTACCACATGGTGTGCCTGT  
>HPV34\_Alpha\_9627334\_nt6026\_L1\_Tile\_rc|1  
GTATAGTGGTGTCTTTAATTCAAGCGGAGGACATTCCCCAGCATTTTGGGTACCACATG  
>HPV34\_Alpha\_9627334\_nt6266\_L1\_Tile\_rc|1  
TTAAGTCATCTGGAATAGCATCGCCTACGTACCTGCCCTGTTAAATAGGTGTCTAACAA  
>HPV34\_Alpha\_9627334\_nt6276\_L1\_Tile\_rc|1

CCCTTAATCATTAAGTCATCTGGAATAGCATCGCCTACAGTACCTGCCCTGTTAAATAGG  
>HPV34\_Alpha\_9627334\_nt6281\_L1\_Tile\_rc|1  
CTGTACCCTTAATCATTAAGTCATCTGGAATAGCATCGCCTACAGTACCTGCCCTGTTAA  
>HPV34\_Alpha\_9627334\_nt6506\_L1\_Tile\_rc|1  
GTGCAGTTGTACTTGTGGATTGTGTACCTACACAACTGAAAAGTTTGTGCTTCTAGTAG  
>HPV34\_Alpha\_9627334\_nt6511\_L1\_Tile\_rc|1  
ATATGGTGCAGTTGTACTTGTGGATTGTGTACCTACACAACTGAAAAGTTTGTGCTTCT  
>HPV34\_Alpha\_9627334\_nt6516\_L1\_Tile\_rc|1  
TTTGCATATGGTGCAGTTGTACTTGTGGATTGTGTACCTACACAACTGAAAAGTTTGTG  
>HPV34\_Alpha\_9627334\_nt6536\_L1\_Tile\_rc|1  
GGTATTCCCTTAAATTAAGTGTGTTTGCATATGGTGCAGTTGTACTTGTGGATTGTGTACCTA  
>HPV34\_Alpha\_9627334\_nt6541\_L1\_Tile\_rc|1  
TCTGAGGTATTCCCTTAAATTAAGTGTGTTTGCATATGGTGCAGTTGTACTTGTGGATTGTGT  
>HPV34\_Alpha\_9627334\_nt6546\_L1\_Tile\_rc|1  
GCATGTCTGAGGTATTCCCTTAAATTAAGTGTGTTTGCATATGGTGCAGTTGTACTTGTGGAT  
>HPV34\_Alpha\_9627334\_nt6936\_L1\_Tile\_rc|1  
TTCTTAGGTGCTGTACTAGATGATGAAGGTGCAGACCGTTTAGAGGCCTGTAACCTAGGA  
>HPV35\_Alpha\_333050\_nt5690\_L1\_Tile\_rc|1  
TATTAGAATCTTGTGTTTTTAATAGCATAGTATGGGTGACCCACAGCTAATAGCCTAGAAC  
>HPV35\_Alpha\_333050\_nt5695\_L1\_Tile\_rc|1  
TATTTTATTAGAATCTTGTGTTTTTAATAGCATAGTATGGGTGACCCACAGCTAATAGCCT  
>HPV35\_Alpha\_333050\_nt5700\_L1\_Tile\_rc|1  
ACTGCTATTTTATTAGAATCTTGTGTTTTTAATAGCATAGTATGGGTGACCCACAGCTAAT  
>HPV35\_Alpha\_333050\_nt5710\_L1\_Tile\_rc|1  
TACCTTGGGTACTGCTATTTTATTAGAATCTTGTGTTTTTAATAGCATAGTATGGGTGACC  
>HPV35\_Alpha\_333050\_nt5720\_L1\_Tile\_rc|1  
GCAAACCAGATACCTTGGGTACTGCTATTTTATTAGAATCTTGTGTTTTTAATAGCATAGT  
>HPV35\_Alpha\_333050\_nt5725\_L1\_Tile\_rc|1  
GTATTGCAAACCAGATACCTTGGGTACTGCTATTTTATTAGAATCTTGTGTTTTTAATAGC  
>HPV35\_Alpha\_333050\_nt5730\_L1\_Tile\_rc|1  
ACTCTGTATTGCAAACCAGATACCTTGGGTACTGCTATTTTATTAGAATCTTGTGTTTTTA  
>HPV35\_Alpha\_333050\_nt5735\_L1\_Tile\_rc|1  
TAAATACTCTGTATTGCAAACCAGATACCTTGGGTACTGCTATTTTATTAGAATCTTGTGTT  
>HPV35\_Alpha\_333050\_nt5955\_L1\_Tile\_rc|1  
CTGTTATCTGTACCAGAGTTACCAGAGTTACCAACATATTTATTAAGATTTTCAGTATCA  
>HPV35\_Alpha\_333050\_nt5960\_L1\_Tile\_rc|1  
ATTCCTGTATCTGTACCAGAGTTACCAGAGTTACCAACATATTTATTAAGATTTTCAG  
>HPV35\_Alpha\_333050\_nt5970\_L1\_Tile\_rc|1  
ATAGAAATGCATTCCTGTATCTGTACCAGAGTTACCAGAGTTACCAACATATTTATTA  
>HPV35\_Alpha\_333050\_nt6085\_L1\_Tile\_rc|1  
AGGAGGACATTCTCCTGCTTTTACCTGGTTAGCATTACAAGGTGTGCCTTTTCCCCAATG  
>HPV35\_Alpha\_333050\_nt6090\_L1\_Tile\_rc|1  
TCCAAAGGAGGACATTCTCCTGCTTTTACCTGGTTAGCATTACAAGGTGTGCCTTTTCCC  
>HPV35\_Alpha\_333050\_nt6095\_L1\_Tile\_rc|1  
GTAACCTCAAAGGAGGACATTCTCCTGCTTTTACCTGGTTAGCATTACAAGGTGTGCCTT  
>HPV35\_Alpha\_333050\_nt6100\_L1\_Tile\_rc|1  
GTTTAGTAACCTCAAAGGAGGACATTCTCCTGCTTTTACCTGGTTAGCATTACAAGGTGT  
>HPV35\_Alpha\_333050\_nt6105\_L1\_Tile\_rc|1  
ACAGTGTTTAGTAACCTCAAAGGAGGACATTCTCCTGCTTTTACCTGGTTAGCATTACAA  
>HPV35\_Alpha\_333050\_nt6110\_L1\_Tile\_rc|1  
GTAGTACAGTGTTTAGTAACCTCAAAGGAGGACATTCTCCTGCTTTTACCTGGTTAGCAT  
>HPV35\_Alpha\_333050\_nt6140\_L1\_Tile\_rc|1  
CAAATCCTGTGTCTACCATGTCCCGTCTTGTAGTACAGTGTTTAGTAACCTCAAAGGAG  
>HPV35\_Alpha\_333050\_nt6200\_L1\_Tile\_rc|1  
TGCATATATCTAGGGGAACATCACTTTTATTAGCTTGTAAATGTAGTAAAATCCATTGCAC

>HPV35\_Alpha\_333050\_nt6205\_L1\_Tile\_rc|1  
GGAAGTGCATATATCTAGGGGAACATCACTTTTATTAGCTTGTAATGTAGTAAAATCCAT  
>HPV35\_Alpha\_333050\_nt6210\_L1\_Tile\_rc|1  
CAAATGGAAGTGCATATATCTAGGGGAACATCACTTTTATTAGCTTGTAATGTAGTAAAA  
>HPV35\_Alpha\_333050\_nt6375\_L1\_Tile\_rc|1  
AATGTGCCAGTGGTACCCTTAATATATAGGTCTGCAGGTACTGTTTCACCTACAGTTCCA  
>HPV35\_Alpha\_333050\_nt6380\_L1\_Tile\_rc|1  
TAGGCAATGTGCCAGTGGTACCCTTAATATATAGGTCTGCAGGTACTGTTTCACCTACAG  
>HPV35\_Alpha\_333050\_nt6395\_L1\_Tile\_rc|1  
GAAAATAACTAGTACTAGGCAATGTGCCAGTGGTACCCTTAATATATAGGTCTGCAGGTA  
>HPV35\_Alpha\_333050\_nt6405\_L1\_Tile\_rc|1  
CTAGGAGTAGGAAAATAACTAGTACTAGGCAATGTGCCAGTGGTACCCTTAATATATAGG  
>HPV35\_Alpha\_333050\_nt6410\_L1\_Tile\_rc|1  
AGCCACTAGGAGTAGGAAAATAACTAGTACTAGGCAATGTGCCAGTGGTACCCTTAATAT  
>HPV35\_Alpha\_333050\_nt6570\_L1\_Tile\_rc|1  
CTAGAAGACACAGCAGAACACACAGACATATTTGTACTACGGGTTGTATCAACTACAGTA  
>HPV35\_Alpha\_333050\_nt6575\_L1\_Tile\_rc|1  
TGTCACTAGAAGACACAGCAGAACACACAGACATATTTGTACTACGGGTTGTATCAACTA  
>HPV35\_Alpha\_333050\_nt6580\_L1\_Tile\_rc|1  
TGTACTGTCACTAGAAGACACAGCAGAACACACAGACATATTTGTACTACGGGTTGTATC  
>HPV35\_Alpha\_333050\_nt6710\_L1\_Tile\_rc|1  
TGGACGGGTTTCATCTATGAATATATGTCATAACATCTGCTGTTAGTGTTATTTTACATA  
>HPV35\_Alpha\_333050\_nt6815\_L1\_Tile\_rc|1  
CACTGGGTTTTTTGACAAGTTACAGCCTGTGATGTTACATAGCGATATGTGTCCTCTAAGG  
>HPV35\_Alpha\_333050\_nt6840\_L1\_Tile\_rc|1  
AATGGATCATCTTTAGGTTTTTGGTGCCTGGGTTTTTTGACAAGTTACAGCCTGTGATGTT  
>HPV35\_Alpha\_333050\_nt6970\_L1\_Tile\_rc|1  
CCTGCCTAATCTAAAATTAGGCCTGGCCTTTAGTCCTGCTTGTAACAAAAATTTACGGCC  
>HPV35\_Alpha\_333050\_nt6980\_L1\_Tile\_rc|1  
GAGCTGCACGCCTGCCTAATCTAAAATTAGGCCTGGCCTTTAGTCCTGCTTGTAACAAAA  
>HPV35\_Alpha\_333050\_nt6985\_L1\_Tile\_rc|1  
TGCTGGAGCTGCACGCCTGCCTAATCTAAAATTAGGCCTGGCCTTTAGTCCTGCTTGTA  
>HPV35\_Alpha\_333050\_nt6990\_L1\_Tile\_rc|1  
GTAGATGCTGGAGCTGCACGCCTGCCTAATCTAAAATTAGGCCTGGCCTTTAGTCCTGCT  
>HPV35\_Alpha\_333050\_nt6995\_L1\_Tile\_rc|1  
TAGATGTAGATGCTGGAGCTGCACGCCTGCCTAATCTAAAATTAGGCCTGGCCTTTAGTC  
>HPV35\_Alpha\_333050\_nt7000\_L1\_Tile\_rc|1  
TTTTTTTAGATGTAGATGCTGGAGCTGCACGCCTGCCTAATCTAAAATTAGGCCTGGCCTT  
>HPV35\_Alpha\_333050\_nt7005\_L1\_Tile\_rc|1  
GAAGATTTTTTTAGATGTAGATGCTGGAGCTGCACGCCTGCCTAATCTAAAATTAGGCCTG  
>HPV35\_Alpha\_333050\_nt7010\_L1\_Tile\_rc|1  
TAGTAGAAGATTTTTTTAGATGTAGATGCTGGAGCTGCACGCCTGCCTAATCTAAAATTAG  
>HPV35\_Alpha\_333050\_nt7015\_L1\_Tile\_rc|1  
ACGTTTGTAGTAGAAGATTTTTTTAGATGTAGATGCTGGAGCTGCACGCCTGCCTAATCTAAA  
>HPV35\_Alpha\_333050\_nt7025\_L1\_Tile\_rc|1  
TTACTTTTCTACGTTTGTAGTAGAAGATTTTTTTAGATGTAGATGCTGGAGCTGCACGCCTGC  
>HPV36\_Beta\_1020218\_nt5967\_L1\_Tile\_rc|1  
AGTCAGTAGTCTGTCGCTGAATGCATGATAATAAATATTTGTCCTTTGTATATATTCATC  
>HPV36\_Beta\_1020218\_nt5972\_L1\_Tile\_rc|1  
CCTACAGTCAGTAGTCTGTCGCTGAATGCATGATAATAAATATTTGTCCTTTGTATATAT  
>HPV36\_Beta\_1020218\_nt5987\_L1\_Tile\_rc|1  
TTGAAGTATGGATGGCCTACAGTCAGTAGTCTGTCGCTGAATGCATGATAATAAATATTT  
>HPV36\_Beta\_1020218\_nt6022\_L1\_Tile\_rc|2  
GGACTTCTAATTTGTTACCAGTAATATCGTAAACATTGAAGTATGGATGGCCTACAGTCA  
>HPV36\_Beta\_1020218\_nt6027\_L1\_Tile\_rc|1

TTTAGGGACTTCTAATTTGTTACCAGTAATATCGTAAACATTGAAGTATGGATGGCCTAC  
>HPV36\_Beta\_1020218\_nt6047\_L1\_Tile\_rc|1  
CTGTGTTGGTTACCAGACACTTTAGGGACTTCTAATTTGTTACCAGTAATATCGTAAACA  
>HPV36\_Beta\_1020218\_nt6062\_L1\_Tile\_rc|2  
TTCAAGCGAAAAACCCTGTGTTGGTTACCAGACACTTTAGGGACTTCTAATTTGTTACCA  
>HPV36\_Beta\_1020218\_nt6387\_L1\_Tile\_rc|1  
GCATAGTCTGTTGTCCTGGCGCTCCTTTTCACAAGGTATAGCCTTGTCCCAATGTTCCACC  
>HPV36\_Beta\_1020218\_nt6397\_L1\_Tile\_rc|1  
CAATTGGTGGGCATAGTCTGTTGTCCTGGCGCTCCTTTTCACAAGGTATAGCCTTGTCCC  
>HPV36\_Beta\_1020218\_nt6402\_L1\_Tile\_rc|2  
CAATTCAATTGGTGGGCATAGTCTGTTGTCCTGGCGCTCCTTTTCACAAGGTATAGCCTT  
>HPV36\_Beta\_1020218\_nt6407\_L1\_Tile\_rc|1  
GTTTTCAATTCAATTGGTGGGCATAGTCTGTTGTCCTGGCGCTCCTTTTCACAAGGTATA  
>HPV36\_Beta\_1020218\_nt6427\_L1\_Tile\_rc|1  
CGCCATCTTCTATATAAGTAGTTTTCAATTCAATTGGTGGGCATAGTCTGTTGTCCTGGC  
>HPV36\_Beta\_1020218\_nt6487\_L1\_Tile\_rc|1  
CTGACCTACTCTCTTGCAGATTTTTGAAGTTTAAATTTCCAAAACCTATATCTGCCATGT  
>HPV36\_Beta\_1020218\_nt6492\_L1\_Tile\_rc|1  
TACATCTGACCTACTCTCTTGCAGATTTTTGAAGTTTAAATTTCCAAAACCTATATCTGC  
>HPV36\_Beta\_1020218\_nt6497\_L1\_Tile\_rc|1  
AAACTTACATCTGACCTACTCTCTTGCAGATTTTTGAAGTTTAAATTTCCAAAACCTATA  
>HPV36\_Beta\_1020218\_nt6502\_L1\_Tile\_rc|2  
TATCCAAACTTACATCTGACCTACTCTCTTGCAGATTTTTGAAGTTTAAATTTCCAAAAC  
>HPV36\_Beta\_1020218\_nt6687\_L1\_Tile\_rc|1  
AAACTGATTCTTAAAGTCCATTATCAATTCTGGCGTCAGGGATGTCGTCACCCGTTTT  
>HPV36\_Beta\_1020218\_nt6692\_L1\_Tile\_rc|1  
ATGAAAACTGATTCTTAAAGTCCATTATCAATTCTGGCGTCAGGGATGTCGTCACCC  
>HPV36\_Beta\_1020218\_nt6707\_L1\_Tile\_rc|1  
CCGTCAGCCCCAGGAATGAAAACTGATTCTTAAAGTCCATTATCAATTCTGGCGTCA  
>HPV36\_Beta\_1020218\_nt6927\_L1\_Tile\_rc|1  
TAGTGCCCCATTATTGTTATATATTGAAATACTAAAGTTAGTATTTTCGTGTGTTGTCTAC  
>HPV36\_Beta\_1020218\_nt6942\_L1\_Tile\_rc|2  
ATCATTGATGTCCTTTAGTGCCCCATTATTGTTATATATTGAAATACTAAAGTTAGTATT  
>HPV36\_Beta\_1020218\_nt6947\_L1\_Tile\_rc|1  
GTGTAATCATTGATGTCCTTTAGTGCCCCATTATTGTTATATATTGAAATACTAAAGTTA  
>HPV36\_Beta\_1020218\_nt6952\_L1\_Tile\_rc|1  
CTGCAGTGTAATCATTGATGTCCTTTAGTGCCCCATTATTGTTATATATTGAAATACTAA  
>HPV36\_Beta\_1020218\_nt6962\_L1\_Tile\_rc|2  
CTAAATTGCTCTGCAGTGTAATCATTGATGTCCTTTAGTGCCCCATTATTGTTATATATT  
>HPV36\_Beta\_1020218\_nt6967\_L1\_Tile\_rc|1  
ATTCTCTAAATTGCTCTGCAGTGTAATCATTGATGTCCTTTAGTGCCCCATTATTGTTAT  
>HPV36\_Beta\_1020218\_nt6987\_L1\_Tile\_rc|1  
TTCCTCCACGTGCCTTTGATATTCTCTAAATTGCTCTGCAGTGTAATCATTGATGTCCTT  
>HPV36\_Beta\_1020218\_nt7152\_L1\_Tile\_rc|1  
TAATGAATCAATATATCGATAGGTGTCTGAATAGGGTTATCTGGAGTAGGTACAAAACC  
>HPV36\_Beta\_1020218\_nt7162\_L1\_Tile\_rc|2  
AGCGAGTGGCTAATGAATCAATATATCGATAGGTGTCTTGAATAGGGTTATCTGGAGTAG  
>HPV36\_Beta\_1020218\_nt7167\_L1\_Tile\_rc|1  
AGGACAGCGAGTGGCTAATGAATCAATATATCGATAGGTGTCTTGAATAGGGTTATCTGG  
>HPV36\_Beta\_1020218\_nt7242\_L1\_Tile\_rc|2  
CCGTTCAAGATCCACATCCAGAAGTTTAAACCCCTTGAGGGATCCTCTTTTTCCCTT  
>HPV36\_Beta\_1020218\_nt7252\_L1\_Tile\_rc|1  
CTAGTGACAACCGTTCAGTAAGATCCACATCCAGAAGTTTAAACCCCTTGAGGGATCCT  
>HPV36\_Beta\_1020218\_nt7257\_L1\_Tile\_rc|1  
CAAATCTAGTGACAACCGTTCAGTAAGATCCACATCCAGAAGTTTAAACCCCTTGAGGG

>HPV36\_Beta\_1020218\_nt7382\_L1\_Tile\_rc|2  
TACTGTTTTTCGCTTGCGCTTGGTTCCCTCTGGTGAACCCTCGATAAGACACTGATTTTGTA  
>HPV36\_Beta\_1020218\_nt7383\_L1\_Tile\_rc|1  
TTACTGTTTTTCGCTTGCGCTTGGTTCCCTCTGGTGAACCCTCGATAAGACACTGATTTTGT  
>HPV37\_Beta\_1020226\_nt6027\_L1\_Tile\_rc|1  
ATAAAGGGTGACCTGTCGTTCCCTACTCCAAGTGGTTGCCCTCGGCCTATCTCCAAGCCCG  
>HPV37\_Beta\_1020226\_nt6082\_L1\_Tile\_rc|2  
TCCCGTGACCCCCCTTGGTAATTACTATTATTCTCAGTGTCCCTTAATTTATTAAATAAA  
>HPV37\_Beta\_1020226\_nt6087\_L1\_Tile\_rc|1  
TATCATCCCCGTGACCCCCCTTGGTAATTACTATTATTCTCAGTGTCCCTTAATTTATTAA  
>HPV37\_Beta\_1020226\_nt6092\_L1\_Tile\_rc|1  
TTGTCTATCATCCCCGTGACCCCCCTTGGTAATTACTATTATTCTCAGTGTCCCTTAATTT  
>HPV37\_Beta\_1020226\_nt6097\_L1\_Tile\_rc|1  
GTGTTTTGTCTATCATCCCCGTGACCCCCCTTGGTAATTACTATTATTCTCAGTGTCCCTT  
>HPV37\_Beta\_1020226\_nt6102\_L1\_Tile\_rc|2  
ATGATGTGTTTTGTCTATCATCCCCGTGACCCCCCTTGGTAATTACTATTATTCTCAGTGT  
>HPV37\_Beta\_1020226\_nt6107\_L1\_Tile\_rc|1  
ATCAAATGATGTGTTTTGTCTATCATCCCCGTGACCCCCCTTGGTAATTACTATTATTCTC  
>HPV37\_Beta\_1020226\_nt6227\_L1\_Tile\_rc|1  
TTCAAGTGGTGGACACTGTCCTGTCTGATTATTTTCCTCTGATGCACAACTGGTGCTTT  
>HPV37\_Beta\_1020226\_nt6232\_L1\_Tile\_rc|1  
TTTAATTCAAGTGGTGGACACTGTCCTGTCTGATTATTTTCCTCTGATGCACAACTGGT  
>HPV37\_Beta\_1020226\_nt6247\_L1\_Tile\_rc|1  
TCAATCACTGTGTTTTTTTAATTCAAGTGGTGGACACTGTCCTGTCTGATTATTTTCCTCT  
>HPV37\_Beta\_1020226\_nt6312\_L1\_Tile\_rc|1  
ATTTATTAGTAGAGAGAACCTTATTGTTAATATTTCCGAACCCTATATCAAACATGTCCC  
>HPV37\_Beta\_1020226\_nt6317\_L1\_Tile\_rc|1  
ATCTGATTTATTAGTAGAGAGAACCTTATTGTTAATATTTCCGAACCCTATATCAAACAT  
>HPV37\_Beta\_1020226\_nt6322\_L1\_Tile\_rc|2  
CTAACATCTGATTTATTAGTAGAGAGAACCTTATTGTTAATATTTCCGAACCCTATATCA  
>HPV37\_Beta\_1020226\_nt6327\_L1\_Tile\_rc|1  
CTAAACTAACATCTGATTTATTAGTAGAGAGAACCTTATTGTTAATATTTCCGAACCCTA  
>HPV37\_Beta\_1020226\_nt6332\_L1\_Tile\_rc|1  
TATATCTAAACTAACATCTGATTTATTAGTAGAGAGAACCTTATTGTTAATATTTCCGAA  
>HPV37\_Beta\_1020226\_nt6337\_L1\_Tile\_rc|1  
TTTACTATATCTAAACTAACATCTGATTTATTAGTAGAGAGAACCTTATTGTTAATATTT  
>HPV37\_Beta\_1020226\_nt6342\_L1\_Tile\_rc|2  
TTTCATTTACTATATCTAAACTAACATCTGATTTATTAGTAGAGAGAACCTTATTGTTAA  
>HPV37\_Beta\_1020226\_nt6527\_L1\_Tile\_rc|1  
GTCTGATTTGGCAGGTAAGTAATATTTGTGGTCCTGATTAACAGTGCCATCGGGAATAGC  
>HPV37\_Beta\_1020226\_nt6532\_L1\_Tile\_rc|1  
TGCTGGTCTGATTTGGCAGGTAAGTAATATTTGTGGTCCTGATTAACAGTGCCATCGGGA  
>HPV37\_Beta\_1020226\_nt6542\_L1\_Tile\_rc|2  
CAGATACTGCTGCTGGTCTGATTTGGCAGGTAAGTAATATTTGTGGTCCTGATTAACAGT  
>HPV37\_Beta\_1020226\_nt6547\_L1\_Tile\_rc|1  
CCTAACAGATACTGCTGCTGGTCTGATTTGGCAGGTAAGTAATATTTGTGGTCCTGATTA  
>HPV37\_Beta\_1020226\_nt6552\_L1\_Tile\_rc|1  
AATTGCCCTAACAGATACTGCTGCTGGTCTGATTTGGCAGGTAAGTAATATTTGTGGTCCT  
>HPV37\_Beta\_1020226\_nt6562\_L1\_Tile\_rc|2  
AAATAGGTAGAATTGCCTAACAGATACTGCTGCTGGTCTGATTTGGCAGGTAAGTAATAT  
>HPV37\_Beta\_1020226\_nt6567\_L1\_Tile\_rc|1  
TGGGAAAATAGGTAGAATTGCCTAACAGATACTGCTGCTGGTCTGATTTGGCAGGTAAGT  
>HPV37\_Beta\_1020226\_nt6572\_L1\_Tile\_rc|1  
AACAGTGGGAAAATAGGTAGAATTGCCTAACAGATACTGCTGCTGGTCTGATTTGGCAGG  
>HPV37\_Beta\_1020226\_nt6577\_L1\_Tile\_rc|1

CCACTAACAGTGGGAAAATAGGTAGAATTGCCTAACAGATACTGCTGCTGGTCTGATTTG  
>HPV37\_Beta\_1020226\_nt6972\_L1\_Tile\_rc|1  
ACTTGGTAGCCTTTGAATTAATGTACCTATAAAGGTCATGTACTGAATTATCTGGAGTAG  
>HPV37\_Beta\_1020226\_nt7112\_L1\_Tile\_rc|1  
CAATCCCGACTGAAAGATGAATTTCTCCCTAAAGGATATTGATCTAAATCCAATGATAA  
>HPV37\_Beta\_1020226\_nt7122\_L1\_Tile\_rc|2  
GTCTACTTTGCAATCCCGACTGAAAGATGAATTTCTCCCTAAAGGATATTGATCTAAAT  
>HPV37\_Beta\_1020226\_nt7127\_L1\_Tile\_rc|1  
TCTAGGTCTACTTTGCAATCCCGACTGAAAGATGAATTTCTCCCTAAAGGATATTGATC  
>HPV37\_Beta\_1020226\_nt7132\_L1\_Tile\_rc|1  
ACAATTCTAGGTCTACTTTGCAATCCCGACTGAAAGATGAATTTCTCCCTAAAGGATAT  
>HPV37\_Beta\_1020226\_nt7137\_L1\_Tile\_rc|1  
ATCGAACAATTCTAGGTCTACTTTGCAATCCCGACTGAAAGATGAATTTCTCCCTAAAG  
>HPV37\_Beta\_1020226\_nt7142\_L1\_Tile\_rc|2  
AGACGATCGAACAATTCTAGGTCTACTTTGCAATCCCGACTGAAAGATGAATTTCTCCCT  
>HPV37\_Beta\_1020226\_nt7147\_L1\_Tile\_rc|1  
TTTACAGACGATCGAACAATTCTAGGTCTACTTTGCAATCCCGACTGAAAGATGAATTTCT  
>HPV37\_Beta\_1020226\_nt7152\_L1\_Tile\_rc|1  
ACACTTTTACAGACGATCGAACAATTCTAGGTCTACTTTGCAATCCCGACTGAAAGATGA  
>HPV37\_Beta\_1020226\_nt7157\_L1\_Tile\_rc|1  
TTTAGACACTTTTACAGACGATCGAACAATTCTAGGTCTACTTTGCAATCCCGACTGAAA  
>HPV37\_Beta\_1020226\_nt7167\_L1\_Tile\_rc|1  
GCTTTGTACCTTTAGACACTTTTACAGACGATCGAACAATTCTAGGTCTACTTTGCAATC  
>HPV37\_Beta\_1020226\_nt7172\_L1\_Tile\_rc|1  
TTTACGCTTTGTACCTTTAGACACTTTTACAGACGATCGAACAATTCTAGGTCTACTTTG  
>HPV37\_Beta\_1020226\_nt7181\_L1\_Tile\_rc|1  
TCACGACCGTTTACGCTTTGTACCTTTAGACACTTTTACAGACGATCGAACAATTCTAGG  
>HPV38\_Beta\_1020234\_nt6352\_L1\_Tile\_rc|1  
CACAAAAAGAAGCAGGAATCACCATAAACATCATTAGACATGGTAAGAAAATCTGGGTA  
>HPV38\_Beta\_1020234\_nt6437\_L1\_Tile\_rc|1  
TTTGGTTGACAGTACCATCTGGAATAGCGTCACCCACTGCACCACCTCGAACAAAATAAT  
>HPV38\_Beta\_1020234\_nt6442\_L1\_Tile\_rc|2  
ATGATTTTGGTTGACAGTACCATCTGGAATAGCGTCACCCACTGCACCACCTCGAACAAA  
>HPV38\_Beta\_1020234\_nt6462\_L1\_Tile\_rc|2  
TTTGCAGGTAAATAATAATTATGATTTTGGTTGACAGTACCATCTGGAATAGCGTCACCC  
>HPV38\_Beta\_1020234\_nt6467\_L1\_Tile\_rc|1  
CATTTTTTGCAGGTAAATAATAATTATGATTTTGGTTGACAGTACCATCTGGAATAGCGT  
>HPV38\_Beta\_1020234\_nt6477\_L1\_Tile\_rc|1  
TGACCCTGTCCATTTTTTGCAGGTAAATAATAATTATGATTTTGGTTGACAGTACCATCT  
>HPV38\_Beta\_1020234\_nt6482\_L1\_Tile\_rc|2  
TGCGTTGACCTGTCCATTTTTTGCAGGTAAATAATAATTATGATTTTGGTTGACAGTAC  
>HPV38\_Beta\_1020234\_nt6487\_L1\_Tile\_rc|1  
TAAAGTGCGTTGACCCTGTCCATTTTTTGCAGGTAAATAATAATTATGATTTTGGTTGAC  
>HPV38\_Beta\_1020234\_nt6492\_L1\_Tile\_rc|1  
TTCCCTAAAGTGCGTTGACCCTGTCCATTTTTTGCAGGTAAATAATAATTATGATTTTGG  
>HPV38\_Beta\_1020234\_nt6497\_L1\_Tile\_rc|1  
TAGAGTTCCCTAAAGTGCGTTGACCCTGTCCATTTTTTGCAGGTAAATAATAATTATGAT  
>HPV38\_Beta\_1020234\_nt6502\_L1\_Tile\_rc|2  
ATACGTAGAGTTCCCTAAAGTGCGTTGACCCTGTCCATTTTTTGCAGGTAAATAATAATT  
>HPV38\_Beta\_1020234\_nt6507\_L1\_Tile\_rc|1  
GGAAAATACGTAGAGTTCCCTAAAGTGCGTTGACCCTGTCCATTTTTTGCAGGTAAATAA  
>HPV38\_Beta\_1020234\_nt6537\_L1\_Tile\_rc|1  
TCAGACGTCACCAAGGATCCACTAACTGTTGGAAAATACGTAGAGTTCCCTAAAGTGCGT  
>HPV38\_Beta\_1020234\_nt6667\_L1\_Tile\_rc|1  
TACACTGATTGTAAAGTTTGTATTTTCGGGTATTATCAGCGACTGTAACAAACATTTGATT



>HPV38\_Beta\_1020234\_nt6672\_L1\_Tile\_rc|1  
GTGGATACACTGATTGTAAAGTTTGTATTTTCGGGTATTATCAGCGACTGTAACAAACATT  
>HPV38\_Beta\_1020234\_nt6677\_L1\_Tile\_rc|1  
TTTCAGTGGATACACTGATTGTAAAGTTTGTATTTTCGGGTATTATCAGCGACTGTAACAA  
>HPV38\_Beta\_1020234\_nt6682\_L1\_Tile\_rc|2  
CCCGTTTTTCAGTGGATACACTGATTGTAAAGTTTGTATTTTCGGGTATTATCAGCGACTGT  
>HPV38\_Beta\_1020234\_nt6692\_L1\_Tile\_rc|1  
CTTGAGCACCCCCGTTTTTCAGTGGATACACTGATTGTAAAGTTTGTATTTTCGGGTATTAT  
>HPV38\_Beta\_1020234\_nt6702\_L1\_Tile\_rc|2  
GAATCATATTCTTGAGCACCCCCGTTTTTCAGTGGATACACTGATTGTAAAGTTTGTATTT  
>HPV38\_Beta\_1020234\_nt6797\_L1\_Tile\_rc|1  
TCAGCACTTCAGCATTTAAAGGAACCTTACACAATTGCAATATAAATGACAATTGGTATT  
>HPV38\_Beta\_1020234\_nt6802\_L1\_Tile\_rc|2  
CTGTGTCAGCACTTCAGCATTTAAAGGAACCTTACACAATTGCAATATAAATGACAATTG  
>HPV38\_Beta\_1020234\_nt6807\_L1\_Tile\_rc|1  
TTAATCTGTGTCAGCACTTCAGCATTTAAAGGAACCTTACACAATTGCAATATAAATGAC  
>HPV38\_Beta\_1020234\_nt6897\_L1\_Tile\_rc|1  
GTTATGTAACGATATGTATCGTGTACAGAATTGTCTGGGGTGGGTACAAAGCCTAATTGC  
>HPV38\_Beta\_1020234\_nt6907\_L1\_Tile\_rc|1  
TGCTTTAGATGTTATGTAACGATATGTATCGTGTACAGAATTGTCTGGGGTGGGTACAAA  
>HPV38\_Beta\_1020234\_nt6922\_L1\_Tile\_rc|2  
ATCTGGACATTTAGTTGCTTTAGATGTTATGTAACGATATGTATCGTGTACAGAATTGTC  
>HPV38\_Beta\_1020234\_nt6927\_L1\_Tile\_rc|1  
ACTGCATCTGGACATTTAGTTGCTTTAGATGTTATGTAACGATATGTATCGTGTACAGAA  
>HPV38\_Beta\_1020234\_nt6937\_L1\_Tile\_rc|1  
TGTTTTCAGGCACTGCATCTGGACATTTAGTTGCTTTAGATGTTATGTAACGATATGTATC  
>HPV38\_Beta\_1020234\_nt6942\_L1\_Tile\_rc|2  
TTTTCTGTTTCAGGCACTGCATCTGGACATTTAGTTGCTTTAGATGTTATGTAACGATAT  
>HPV38\_Beta\_1020234\_nt7092\_L1\_Tile\_rc|1  
ACTAACGGCCGTTTGACAGCACGTGTTTCGTGCTGTTTGTAACCTGCTTGGAATAAAAAAT  
>HPV38\_Beta\_1020234\_nt7097\_L1\_Tile\_rc|1  
TTCTTACTAACGGCCGTTTGACAGCACGTGTTTCGTGCTGTTTGTAACCTGCTTGGAATA  
>HPV38\_Beta\_1020234\_nt7102\_L1\_Tile\_rc|2  
AGATTTTCTTACTAACGGCCGTTTGACAGCACGTGTTTCGTGCTGTTTGTAACCTGCTTG  
>HPV38\_Beta\_1020234\_nt7107\_L1\_Tile\_rc|1  
TTGGAAGATTTTCTTACTAACGGCCGTTTGACAGCACGTGTTTCGTGCTGTTTGTAACCT  
>HPV38\_Beta\_1020234\_nt7112\_L1\_Tile\_rc|1  
CAGATTTGGAAGATTTTCTTACTAACGGCCGTTTGACAGCACGTGTTTCGTGCTGTTTGTA  
>HPV38\_Beta\_1020234\_nt7127\_L1\_Tile\_rc|1  
TCCTTTTGCGTTTTACAGATTTGGAAGATTTTCTTACTAACGGCCGTTTGACAGCACGTG  
>HPV38\_Beta\_1020234\_nt7135\_L1\_Tile\_rc|1  
TTACTGGGTCCTTTTGCGTTTTACAGATTTGGAAGATTTTCTTACTAACGGCCGTTTGAC  
>HPV39\_Alpha\_333245\_nt6004\_L1\_Tile\_rc|1  
CTTATTGGTGGTTGATGAAAATGGTGAGTTTTTCAGTATCATCCTGTCTATTATATAATGG  
>HPV39\_Alpha\_333245\_nt6009\_L1\_Tile\_rc|1  
CTGTCCTTATTGGTGGTTGATGAAAATGGTGAGTTTTTCAGTATCATCCTGTCTATTATAT  
>HPV39\_Alpha\_333245\_nt6014\_L1\_Tile\_rc|1  
CCCTACTGTCCTTATTGGTGGTTGATGAAAATGGTGAGTTTTTCAGTATCATCCTGTCTAT  
>HPV39\_Alpha\_333245\_nt6419\_L1\_Tile\_rc|1  
TGCCCCTAATATACAATTGGGCAGGAATGGCGTCACCCACCATAACCACCACGATTCCAAA  
>HPV39\_Alpha\_333245\_nt6424\_L1\_Tile\_rc|1  
ATCTGTGCCCTTAATATACAATTGGGCAGGAATGGCGTCACCCACCATAACCACCACGATT  
>HPV39\_Alpha\_333245\_nt6429\_L1\_Tile\_rc|1  
CGTATATCTGTGCCCTTAATATACAATTGGGCAGGAATGGCGTCACCCACCATAACCACCA  
>HPV39\_Alpha\_333245\_nt6439\_L1\_Tile\_rc|1

GGGGTTTGCACGTATATCTGTGCCCTTAATATACAATTGGGCAGGAATGGCGTCACCCAC  
>HPV39\_Alpha\_333245\_nt6454\_L1\_Tile\_rc|1  
GTATACAGAACTACCGGGTTTGCACGTATATCTGTGCCCTTAATATACAATTGGGCAGG  
>HPV39\_Alpha\_333245\_nt6469\_L1\_Tile\_rc|1  
GCTGGGAGAGGGGCAGTATACAGAACTACCGGGTTTGCACGTATATCTGTGCCCTTAAT  
>HPV39\_Alpha\_333245\_nt6479\_L1\_Tile\_rc|1  
CCATGGAACCGCTGGGAGAGGGGCAGTATACAGAACTACCGGGTTTGCACGTATATCTG  
>HPV39\_Alpha\_333245\_nt6489\_L1\_Tile\_rc|1  
TCAGAGGTTACCATGGAACCGCTGGGAGAGGGGCAGTATACAGAACTACCGGGTTTGC  
>HPV39\_Alpha\_333245\_nt6499\_L1\_Tile\_rc|1  
TAACTGGGAATCAGAGGTTACCATGGAACCGCTGGGAGAGGGGCAGTATACAGAACTACC  
>HPV39\_Alpha\_333245\_nt6619\_L1\_Tile\_rc|1  
GGTAGATAATGTAAAGTTGGTACTACGGGTAGTGTCCACAACAGTAAGAAATAATTGATT  
>HPV39\_Alpha\_333245\_nt6624\_L1\_Tile\_rc|1  
ATAGAGGTAGATAATGTAAAGTTGGTACTACGGGTAGTGTCCACAACAGTAAGAAATAAT  
>HPV39\_Alpha\_333245\_nt6629\_L1\_Tile\_rc|1  
ACTCTATAGAGGTAGATAATGTAAAGTTGGTACTACGGGTAGTGTCCACAACAGTAAGAA  
>HPV39\_Alpha\_333245\_nt6634\_L1\_Tile\_rc|1  
GGAAGACTCTATAGAGGTAGATAATGTAAAGTTGGTACTACGGGTAGTGTCCACAACAGT  
>HPV39\_Alpha\_333245\_nt6639\_L1\_Tile\_rc|1  
GGTATGGAAGACTCTATAGAGGTAGATAATGTAAAGTTGGTACTACGGGTAGTGTCCACA  
>HPV39\_Alpha\_333245\_nt6644\_L1\_Tile\_rc|1  
TAGAAGGTATGGAAGACTCTATAGAGGTAGATAATGTAAAGTTGGTACTACGGGTAGTGT  
>HPV39\_Alpha\_333245\_nt6649\_L1\_Tile\_rc|1  
ATATGTAGAAGGTATGGAAGACTCTATAGAGGTAGATAATGTAAAGTTGGTACTACGGGT  
>HPV39\_Alpha\_333245\_nt6654\_L1\_Tile\_rc|1  
GGATCATATGTAGAAGGTATGGAAGACTCTATAGAGGTAGATAATGTAAAGTTGGTACTA  
>HPV39\_Alpha\_333245\_nt6664\_L1\_Tile\_rc|1  
AAACTTAGAAGGATCATATGTAGAAGGTATGGAAGACTCTATAGAGGTAGATAATGTAAA  
>HPV39\_Alpha\_333245\_nt6674\_L1\_Tile\_rc|1  
TATATTCCCTTAACTTAGAAGGATCATATGTAGAAGGTATGGAAGACTCTATAGAGGTAG  
>HPV39\_Alpha\_333245\_nt6679\_L1\_Tile\_rc|1  
CCTGGTATATTCCCTTAACTTAGAAGGATCATATGTAGAAGGTATGGAAGACTCTATAGA  
>HPV39\_Alpha\_333245\_nt6764\_L1\_Tile\_rc|1  
TAGTGTGAATATAAGACATAACATCAGTTGTTAATGTGACAGTACACAGTTGAAATATAA  
>HPV39\_Alpha\_333245\_nt6779\_L1\_Tile\_rc|1  
ATATAGAGGAATTCATAGTGTGAATATAAGACATAACATCAGTTGTTAATGTGACAGTAC  
>HPV39\_Alpha\_333245\_nt6789\_L1\_Tile\_rc|1  
CAATTGTCCAATATAGAGGAATTCATAGTGTGAATATAAGACATAACATCAGTTGTTAAT  
>HPV39\_Alpha\_333245\_nt6844\_L1\_Tile\_rc|1  
GTATCTGTAAAGTGTCTACCAAACCTGGCAGATGGTGGAGGAGCTACAGCAAAATTCGAATT  
>HPV39\_Alpha\_333245\_nt6849\_L1\_Tile\_rc|1  
TGTAGGTATCTGTAAAGTGTCTACCAAACCTGGCAGATGGTGGAGGAGCTACAGCAAAATTC  
>HPV39\_Alpha\_333245\_nt6854\_L1\_Tile\_rc|1  
CAGACTGTAGGTATCTGTAAAGTGTCTACCAAACCTGGCAGATGGTGGAGGAGCTACAGCAA  
>HPV39\_Alpha\_333245\_nt6869\_L1\_Tile\_rc|1  
GACATGTAATGGCTGCAGACTGTAGGTATCTGTAAAGTGTCTACCAAACCTGGCAGATGGTG  
>HPV39\_Alpha\_333245\_nt7054\_L1\_Tile\_rc|1  
AGTGGATGCAGCAGGCCGCTTTTCGGGGACCTATAGTAGGGCGCCTGCGGACCCTGGCCTG  
>HPV39\_Alpha\_333245\_nt7059\_L1\_Tile\_rc|1  
GAGGAAGTGGATGCAGCAGGCCGCTTTTCGGGGACCTATAGTAGGGCGCCTGCGGACCCTG  
>HPV40\_Alpha\_397014\_nt5885\_L1\_Tile\_rc|1  
ATTGGGTTTTTTTTAACTCAAAGTATGGATGTCCTATAGTCAGTAACCTGGCACTACCAGC  
>HPV40\_Alpha\_397014\_nt5890\_L1\_Tile\_rc|1  
TCACCATTGGGTTTTTTTTAACTCAAAGTATGGATGTCCTATAGTCAGTAACCTGGCACTA

>HPV40\_Alpha\_397014\_nt5900\_L1\_Tile\_rc|1  
CACTGAAATGTCACCATTGGGTTTTTTTAACTCAAAGTATGGATGTCCTATAGTCAGTAA  
>HPV40\_Alpha\_397014\_nt5905\_L1\_Tile\_rc|1  
TTAGGCACTGAAATGTCACCATTGGGTTTTTTTAACTCAAAGTATGGATGTCCTATAGTC  
>HPV40\_Alpha\_397014\_nt6145\_L1\_Tile\_rc|1  
CTACTATCCTGCCCCGACCTGTGCCATAGGCAGATGAGTTTTCCACATCCTCATCCTTA  
>HPV40\_Alpha\_397014\_nt6160\_L1\_Tile\_rc|1  
ATAGCTACATTTTCCCTACTATCCTGCCCCGACCTGTGCCATAGGCAGATGAGTTTTCC  
>HPV40\_Alpha\_397014\_nt6565\_L1\_Tile\_rc|1  
GTCCGACCAGATGTACCTGTTATATATAAGTCAGTTGGGACACTATCACCAGTAGTACCT  
>HPV40\_Alpha\_397014\_nt6575\_L1\_Tile\_rc|1  
TGCAATAGGAGTCCGACCAGATGTACCTGTTATATATAAGTCAGTTGGGACACTATCACC  
>HPV40\_Alpha\_397014\_nt6795\_L1\_Tile\_rc|1  
AATTACTGTTATTATATGGGGTTGGTGTGGGGGACTGTGTGGCAGCACATAAGGTAAAT  
>HPV40\_Alpha\_397014\_nt6800\_L1\_Tile\_rc|1  
CTTGAAATTACTGTTATTATATGGGGTTGGTGTGGGGGACTGTGTGGCAGCACATAAGGT  
>HPV40\_Alpha\_397014\_nt6810\_L1\_Tile\_rc|1  
GCAAATATTCCTTGAAATTACTGTTATTATATGGGGTTGGTGTGGGGGACTGTGTGGCAG  
>HPV40\_Alpha\_397014\_nt6990\_L1\_Tile\_rc|1  
CCTTGTTGGTAAGGAACCTATATGTATCCTCTAAGGATGCAGAGGCTGGAGGAGCAATTT  
>HPV40\_Alpha\_397014\_nt6995\_L1\_Tile\_rc|1  
AATAGCCTTGTGGTAAGGAACCTATATGTATCCTCTAAGGATGCAGAGGCTGGAGGAGC  
>HPV40\_Alpha\_397014\_nt7000\_L1\_Tile\_rc|1  
CAGGCAATAGCCTTGTGGTAAGGAACCTATATGTATCCTCTAAGGATGCAGAGGCTGGA  
>HPV40\_Alpha\_397014\_nt7005\_L1\_Tile\_rc|1  
GCTGACAGGCAATAGCCTTGTGGTAAGGAACCTATATGTATCCTCTAAGGATGCAGAGG  
>HPV40\_Alpha\_397014\_nt7010\_L1\_Tile\_rc|1  
ATCGCGCTGACAGGCAATAGCCTTGTGGTAAGGAACCTATATGTATCCTCTAAGGATGC  
>HPV41\_Nu\_9626041\_nt5337\_L1\_Tile\_rc|1  
TAGTAGGATAGACAATGTGAGTGCCATCATCGCTAAAAATAAATACTGAAGGCCTGTCAT  
>HPV41\_Nu\_9626041\_nt5342\_L1\_Tile\_rc|2  
TGTGCTAGTAGGATAGACAATGTGAGTGCCATCATCGCTAAAAATAAATACTGAAGGCCT  
>HPV41\_Nu\_9626041\_nt5357\_L1\_Tile\_rc|1  
TGGGGTGGTGGCTGTTGTGCTAGTAGGATAGACAATGTGAGTGCCATCATCGCTAAAAAT  
>HPV41\_Nu\_9626041\_nt5367\_L1\_Tile\_rc|1  
CAGGCACGAGTGGGGTGGTGGCTGTTGTGCTAGTAGGATAGACAATGTGAGTGCCATCAT  
>HPV41\_Nu\_9626041\_nt5372\_L1\_Tile\_rc|1  
CTGTGCAGGCACGAGTGGGGTGGTGGCTGTTGTGCTAGTAGGATAGACAATGTGAGTGCC  
>HPV41\_Nu\_9626041\_nt5397\_L1\_Tile\_rc|1  
CAACAATGTAGGGCACATCGCTGGGCTGTGCAGGCACGAGTGGGGTGGTGGCTGTTGTGC  
>HPV41\_Nu\_9626041\_nt5407\_L1\_Tile\_rc|1  
TACAAGTCAACAACAATGTAGGGCACATCGCTGGGCTGTGCAGGCACGAGTGGGGTGGTG  
>HPV41\_Nu\_9626041\_nt5427\_L1\_Tile\_rc|1  
CATAATCCATACTTCCACTATACAAGTCAACAACAATGTAGGGCACATCGCTGGGCTGTG  
>HPV41\_Nu\_9626041\_nt5432\_L1\_Tile\_rc|1  
TATATCATAATCCATACTTCCACTATACAAGTCAACAACAATGTAGGGCACATCGCTGGG  
>HPV41\_Nu\_9626041\_nt5442\_L1\_Tile\_rc|2  
GGCTAGGATGTATATCATAATCCATACTTCCACTATACAAGTCAACAACAATGTAGGGCA  
>HPV41\_Nu\_9626041\_nt5447\_L1\_Tile\_rc|1  
CAACAGGCTAGGATGTATATCATAATCCATACTTCCACTATACAAGTCAACAACAATGTA  
>HPV41\_Nu\_9626041\_nt5452\_L1\_Tile\_rc|1  
CTGCGCAACAGGCTAGGATGTATATCATAATCCATACTTCCACTATACAAGTCAACAACA  
>HPV41\_Nu\_9626041\_nt5467\_L1\_Tile\_rc|1  
CGTTTTTTTACGTTTCCTGCGCAACAGGCTAGGATGTATATCATAATCCATACTTCCACTA  
>HPV41\_Nu\_9626041\_nt5472\_L1\_Tile\_rc|1

GTTTGC GTTTTTTACGTTTCCTGCGCAACAGGCTAGGATGTATATCATAATCCATACTTC  
>HPV41\_Nu\_9626041\_nt5522\_L1\_Tile\_rc|2  
TAAAAATCTATTTGGGCCTGGAAGCCACACGGCCATCTGAAAAATAAACACGTTTGC GTTT  
>HPV41\_Nu\_9626041\_nt5527\_L1\_Tile\_rc|1  
GTAAGTAAAATCTATTTGGGCCTGGAAGCCACACGGCCATCTGAAAAATAAACACGTTTG  
>HPV41\_Nu\_9626041\_nt5537\_L1\_Tile\_rc|1  
GGTTGAGGGGGTAAGTAAAATCTATTTGGGCCTGGAAGCCACACGGCCATCTGAAAAATA  
>HPV41\_Nu\_9626041\_nt5542\_L1\_Tile\_rc|2  
GTATAGGTTGAGGGGGTAAGTAAAATCTATTTGGGCCTGGAAGCCACACGGCCATCTGAA  
>HPV41\_Nu\_9626041\_nt5552\_L1\_Tile\_rc|1  
AATGTCCGTTGTATAGGTTGAGGGGGTAAGTAAAATCTATTTGGGCCTGGAAGCCACACG  
>HPV41\_Nu\_9626041\_nt5557\_L1\_Tile\_rc|1  
TGTTCAATGTCCGTTGTATAGGTTGAGGGGGTAAGTAAAATCTATTTGGGCCTGGAAGCC  
>HPV41\_Nu\_9626041\_nt5572\_L1\_Tile\_rc|1  
TCACGTATTCCTCTGTGTTCAATGTCCGTTGTATAGGTTGAGGGGGTAAGTAAAATCTAT  
>HPV41\_Nu\_9626041\_nt5577\_L1\_Tile\_rc|1  
GCGTCTCACGTATTCCTCTGTGTTCAATGTCCGTTGTATAGGTTGAGGGGGTAAGTAAA  
>HPV41\_Nu\_9626041\_nt5587\_L1\_Tile\_rc|1  
AAGTACTGGTGC GTCTCACGTATTCCTCTGTGTTCAATGTCCGTTGTATAGGTTGAGGGG  
>HPV41\_Nu\_9626041\_nt5612\_L1\_Tile\_rc|1  
AAACGGTCAGTGGCAGCATGGAGGAAAGTACTGGTGC GTCTCACGTATTCCTCTGTGTT  
>HPV41\_Nu\_9626041\_nt5622\_L1\_Tile\_rc|2  
AACAGTAAGCAAACGGTCAGTGGCAGCATGGAGGAAAGTACTGGTGC GTCTCACGTATTC  
>HPV41\_Nu\_9626041\_nt5642\_L1\_Tile\_rc|3  
ATATTGTAAAATGGATGTCCAACAGTAAGCAAACGGTCAGTGGCAGCATGGAGGAAAGTA  
>HPV41\_Nu\_9626041\_nt5647\_L1\_Tile\_rc|1  
TAGTAATATTGTAAAATGGATGTCCAACAGTAAGCAAACGGTCAGTGGCAGCATGGAGGA  
>HPV41\_Nu\_9626041\_nt5657\_L1\_Tile\_rc|1  
CCATCCGCATTAGTAATATTGTAAAATGGATGTCCAACAGTAAGCAAACGGTCAGTGGCA  
>HPV41\_Nu\_9626041\_nt5662\_L1\_Tile\_rc|2  
CTTTGCCATCCGCATTAGTAATATTGTAAAATGGATGTCCAACAGTAAGCAAACGGTCAG  
>HPV41\_Nu\_9626041\_nt5672\_L1\_Tile\_rc|1  
GGGACCACCTCTTTGCCATCCGCATTAGTAATATTGTAAAATGGATGTCCAACAGTAAGC  
>HPV41\_Nu\_9626041\_nt5682\_L1\_Tile\_rc|2  
GGAAACTTTAGGGACCACCTCTTTGCCATCCGCATTAGTAATATTGTAAAATGGATGTCC  
>HPV41\_Nu\_9626041\_nt5687\_L1\_Tile\_rc|1  
TTAGAGGAAACTTTAGGGACCACCTCTTTGCCATCCGCATTAGTAATATTGTAAAATGGA  
>HPV41\_Nu\_9626041\_nt5692\_L1\_Tile\_rc|1  
ACTGATTAGAGGAAACTTTAGGGACCACCTCTTTGCCATCCGCATTAGTAATATTGTAAA  
>HPV41\_Nu\_9626041\_nt5697\_L1\_Tile\_rc|1  
CCTGAACTGATTAGAGGAAACTTTAGGGACCACCTCTTTGCCATCCGCATTAGTAATATT  
>HPV41\_Nu\_9626041\_nt5707\_L1\_Tile\_rc|1  
CACGGAAGGCCCTGAACTGATTAGAGGAAACTTTAGGGACCACCTCTTTGCCATCCGCAT  
>HPV41\_Nu\_9626041\_nt5722\_L1\_Tile\_rc|2  
GATTTGGGAAACGGACACGGAAGGCCCTGAACTGATTAGAGGAAACTTTAGGGACCACCT  
>HPV41\_Nu\_9626041\_nt5727\_L1\_Tile\_rc|1  
ATTGGGATTGGGAAACGGACACGGAAGGCCCTGAACTGATTAGAGGAAACTTTAGGGAC  
>HPV41\_Nu\_9626041\_nt5732\_L1\_Tile\_rc|1  
AAGGTATTGGGATTGGGAAACGGACACGGAAGGCCCTGAACTGATTAGAGGAAACTTTA  
>HPV41\_Nu\_9626041\_nt5737\_L1\_Tile\_rc|1  
ATGCAAAGGTATTGGGATTGGGAAACGGACACGGAAGGCCCTGAACTGATTAGAGGAAA  
>HPV41\_Nu\_9626041\_nt5742\_L1\_Tile\_rc|2  
ACAAAATGCAAAGGTATTGGGATTGGGAAACGGACACGGAAGGCCCTGAACTGATTAGA  
>HPV41\_Nu\_9626041\_nt5747\_L1\_Tile\_rc|1  
TTATCACAAAATGCAAAGGTATTGGGATTGGGAAACGGACACGGAAGGCCCTGAACTGA

>HPV41\_Nu\_9626041\_nt5757\_L1\_Tile\_rc|1  
AAAAAGGGACTTATCACAAAATGCAAAGGTATTGGGATTTGGGAAACGGACACGGAAGGC  
>HPV41\_Nu\_9626041\_nt5762\_L1\_Tile\_rc|2  
GGGTAAAAAGGGACTTATCACAAAATGCAAAGGTATTGGGATTTGGGAAACGGACACGG  
>HPV41\_Nu\_9626041\_nt5772\_L1\_Tile\_rc|1  
CTCCTTGTTCAGGGTTAAAAAGGGACTTATCACAAAATGCAAAGGTATTGGGATTTGGGAA  
>HPV41\_Nu\_9626041\_nt5777\_L1\_Tile\_rc|1  
AGACGCTCCTTGTTCAGGGTTAAAAAGGGACTTATCACAAAATGCAAAGGTATTGGGATTT  
>HPV41\_Nu\_9626041\_nt5782\_L1\_Tile\_rc|2  
AGACCAGACGCTCCTTGTTCAGGGTTAAAAAGGGACTTATCACAAAATGCAAAGGTATTGG  
>HPV41\_Nu\_9626041\_nt5792\_L1\_Tile\_rc|1  
CGAATACCCAGACCAGACGCTCCTTGTTCAGGGTTAAAAAGGGACTTATCACAAAATGCA  
>HPV41\_Nu\_9626041\_nt5852\_L1\_Tile\_rc|1  
AAAAAAGGGTTCCCTGTTACACCAATACCTAAGGGCTGTCCCCTAGAAACCTCAATCCCA  
>HPV41\_Nu\_9626041\_nt5857\_L1\_Tile\_rc|1  
TATTAAAAAAGGGTTCCCTGTTACACCAATACCTAAGGGCTGTCCCCTAGAAACCTCAA  
>HPV41\_Nu\_9626041\_nt5862\_L1\_Tile\_rc|2  
AAACTTATTAAAAAAGGGTTCCCTGTTACACCAATACCTAAGGGCTGTCCCCTAGAAAC  
>HPV41\_Nu\_9626041\_nt5882\_L1\_Tile\_rc|2  
TAGGGATTTTCAGCATCATCAAACCTATTAAAAAAGGGTTCCCTGTTACACCAATACCT  
>HPV41\_Nu\_9626041\_nt5887\_L1\_Tile\_rc|1  
CATTGTAGGGATTTTCAGCATCATCAAACCTATTAAAAAAGGGTTCCCTGTTACACCAA  
>HPV41\_Nu\_9626041\_nt5892\_L1\_Tile\_rc|1  
TATACCATTTGTAGGGATTTTCAGCATCATCAAACCTATTAAAAAAGGGTTCCCTGTTAC  
>HPV41\_Nu\_9626041\_nt5897\_L1\_Tile\_rc|1  
TTGTTTATACCATTTGTAGGGATTTTCAGCATCATCAAACCTATTAAAAAAGGGTTCCCT  
>HPV41\_Nu\_9626041\_nt5902\_L1\_Tile\_rc|2  
TATTTTTGTTTATACCATTTGTAGGGATTTTCAGCATCATCAAACCTATTAAAAAAGGGT  
>HPV41\_Nu\_9626041\_nt5907\_L1\_Tile\_rc|1  
AATGTTATTTTGTTTTATACCATTTGTAGGGATTTTCAGCATCATCAAACCTATTAAAAA  
>HPV41\_Nu\_9626041\_nt5912\_L1\_Tile\_rc|1  
TCAGTAATGTTATTTTTGTTTATACCATTTGTAGGGATTTTCAGCATCATCAAACCTATTA  
>HPV41\_Nu\_9626041\_nt5917\_L1\_Tile\_rc|1  
CTTGGTCAGTAATGTTATTTTTGTTTATACCATTTGTAGGGATTTTCAGCATCATCAAAC  
>HPV41\_Nu\_9626041\_nt5922\_L1\_Tile\_rc|2  
TGAACCTTGGTCAGTAATGTTATTTTTGTTTATACCATTTGTAGGGATTTTCAGCATCATC  
>HPV41\_Nu\_9626041\_nt5927\_L1\_Tile\_rc|1  
GAGTCTGAACCTTGGTCAGTAATGTTATTTTTGTTTATACCATTTGTAGGGATTTTCAGCA  
>HPV41\_Nu\_9626041\_nt5932\_L1\_Tile\_rc|1  
ACCTTGAGTCTGAACCTTGGTCAGTAATGTTATTTTTGTTTATACCATTTGTAGGGATTTT  
>HPV41\_Nu\_9626041\_nt5937\_L1\_Tile\_rc|1  
GCTCAACCTTGAGTCTGAACCTTGGTCAGTAATGTTATTTTTGTTTATACCATTTGTAGGG  
>HPV41\_Nu\_9626041\_nt5942\_L1\_Tile\_rc|2  
GCAATGCTCAACCTTGAGTCTGAACCTTGGTCAGTAATGTTATTTTTGTTTATACCATTTG  
>HPV41\_Nu\_9626041\_nt5982\_L1\_Tile\_rc|2  
AGCACCTACTATCAGCAGCTGTGTTTGCTTAGGGTCAAATGCAATGCTCAACCTTGAGTC  
>HPV41\_Nu\_9626041\_nt5987\_L1\_Tile\_rc|1  
GGTTTAGCACCTACTATCAGCAGCTGTGTTTGCTTAGGGTCAAATGCAATGCTCAACCTT  
>HPV41\_Nu\_9626041\_nt5997\_L1\_Tile\_rc|1  
ACCCTTTGCAGGTTTAGCACCTACTATCAGCAGCTGTGTTTGCTTAGGGTCAAATGCAAT  
>HPV41\_Nu\_9626041\_nt6002\_L1\_Tile\_rc|2  
TACTCACCTTTGCAGGTTTAGCACCTACTATCAGCAGCTGTGTTTGCTTAGGGTCAAAT  
>HPV41\_Nu\_9626041\_nt6017\_L1\_Tile\_rc|1  
GCAGCAACGTCCCAGTACTACCTTTGCAGGTTTAGCACCTACTATCAGCAGCTGTGTT  
>HPV41\_Nu\_9626041\_nt6022\_L1\_Tile\_rc|2

ATGTTGCAGCAACGTCCCAGTACTCACCCCTTTGCAGGTTTAGCACCTACTATCAGCAGCT  
>HPV41\_Nu\_9626041\_nt6027\_L1\_Tile\_rc|1  
TTCACATGTTGCAGCAACGTCCCAGTACTCACCCCTTTGCAGGTTTAGCACCTACTATCAG  
>HPV41\_Nu\_9626041\_nt6032\_L1\_Tile\_rc|1  
GGGTTTTTCACATGTTGCAGCAACGTCCCAGTACTCACCCCTTTGCAGGTTTAGCACCTACT  
>HPV41\_Nu\_9626041\_nt6057\_L1\_Tile\_rc|1  
TTTGTGCATCTGCTTTGGTCAGTGGAGGGTTTTTCACATGTTGCAGCAACGTCCCAGTACTC  
>HPV41\_Nu\_9626041\_nt6077\_L1\_Tile\_rc|1  
TTAAGCTCTAGAGCAGGACATTTGTGCATCTGCTTTGGTCAGTGGAGGGTTTTTCACATGTT  
>HPV41\_Nu\_9626041\_nt6082\_L1\_Tile\_rc|2  
AGGACTTAAGCTCTAGAGCAGGACATTTGTGCATCTGCTTTGGTCAGTGGAGGGTTTTTCAC  
>HPV41\_Nu\_9626041\_nt6087\_L1\_Tile\_rc|1  
GTATGAGGACTTAAGCTCTAGAGCAGGACATTTGTGCATCTGCTTTGGTCAGTGGAGGGTT  
>HPV41\_Nu\_9626041\_nt6092\_L1\_Tile\_rc|1  
TCAATGTATGAGGACTTAAGCTCTAGAGCAGGACATTTGTGCATCTGCTTTGGTCAGTGGGA  
>HPV41\_Nu\_9626041\_nt6102\_L1\_Tile\_rc|2  
GTCTGCATCCTCAATGTATGAGGACTTAAGCTCTAGAGCAGGACATTTGTGCATCTGCTTT  
>HPV41\_Nu\_9626041\_nt6112\_L1\_Tile\_rc|1  
TGTCACCTCATGTCTGCATCCTCAATGTATGAGGACTTAAGCTCTAGAGCAGGACATTTGT  
>HPV41\_Nu\_9626041\_nt6122\_L1\_Tile\_rc|2  
CCCAGGCCTATGTCACTCATGTCTGCATCCTCAATGTATGAGGACTTAAGCTCTAGAGCA  
>HPV41\_Nu\_9626041\_nt6127\_L1\_Tile\_rc|1  
AGTTTTCCAGGCCTATGTCACTCATGTCTGCATCCTCAATGTATGAGGACTTAAGCTCTA  
>HPV41\_Nu\_9626041\_nt6132\_L1\_Tile\_rc|1  
ATTCAAGTTTCCAGGCCTATGTCACTCATGTCTGCATCCTCAATGTATGAGGACTTAAG  
>HPV41\_Nu\_9626041\_nt6137\_L1\_Tile\_rc|1  
GAAAAATTCAAGTTTCCAGGCCTATGTCACTCATGTCTGCATCCTCAATGTATGAGGAC  
>HPV41\_Nu\_9626041\_nt6147\_L1\_Tile\_rc|1  
CTGCAGTGTAGAAAAATTCAAGTTTCCAGGCCTATGTCACTCATGTCTGCATCCTCAAT  
>HPV41\_Nu\_9626041\_nt6152\_L1\_Tile\_rc|1  
TTTCTCTGCAGTGTAGAAAAATTCAAGTTTCCAGGCCTATGTCACTCATGTCTGCATCC  
>HPV41\_Nu\_9626041\_nt6157\_L1\_Tile\_rc|1  
ATTTGTTTCTCTGCAGTGTAGAAAAATTCAAGTTTCCAGGCCTATGTCACTCATGTCTG  
>HPV41\_Nu\_9626041\_nt6162\_L1\_Tile\_rc|2  
ATCGGATTTGTTTCTCTGCAGTGTAGAAAAATTCAAGTTTCCAGGCCTATGTCACTCAT  
>HPV41\_Nu\_9626041\_nt6167\_L1\_Tile\_rc|1  
GGGGCATCGGATTTGTTTCTCTGCAGTGTAGAAAAATTCAAGTTTCCAGGCCTATGTCA  
>HPV41\_Nu\_9626041\_nt6172\_L1\_Tile\_rc|1  
CTAATGGGGCATCGGATTTGTTTCTCTGCAGTGTAGAAAAATTCAAGTTTCCAGGCCTA  
>HPV41\_Nu\_9626041\_nt6177\_L1\_Tile\_rc|1  
AATATCTAATGGGGCATCGGATTTGTTTCTCTGCAGTGTAGAAAAATTCAAGTTTCCAG  
>HPV41\_Nu\_9626041\_nt6182\_L1\_Tile\_rc|2  
TCCACAATATCTAATGGGGCATCGGATTTGTTTCTCTGCAGTGTAGAAAAATTCAAGTTT  
>HPV41\_Nu\_9626041\_nt6187\_L1\_Tile\_rc|1  
TAGAATCCACAATATCTAATGGGGCATCGGATTTGTTTCTCTGCAGTGTAGAAAAATTCA  
>HPV41\_Nu\_9626041\_nt6192\_L1\_Tile\_rc|1  
GCAGATAGAATCCACAATATCTAATGGGGCATCGGATTTGTTTCTCTGCAGTGTAGAAAA  
>HPV41\_Nu\_9626041\_nt6197\_L1\_Tile\_rc|1  
TATTTGCAGATAGAATCCACAATATCTAATGGGGCATCGGATTTGTTTCTCTGCAGTGTA  
>HPV41\_Nu\_9626041\_nt6202\_L1\_Tile\_rc|2  
CAGGATATTTGCAGATAGAATCCACAATATCTAATGGGGCATCGGATTTGTTTCTCTGCA  
>HPV41\_Nu\_9626041\_nt6207\_L1\_Tile\_rc|1  
GTAGTCAGGATATTTGCAGATAGAATCCACAATATCTAATGGGGCATCGGATTTGTTTCT  
>HPV41\_Nu\_9626041\_nt6257\_L1\_Tile\_rc|1  
CGCACATAGAAAAACATGTGGTCTCCATATAGTTCTTCTATCATTTGCAGGTAGTCAGGA

>HPV41\_Nu\_9626041\_nt6267\_L1\_Tile\_rc|1  
AGCTTCACGCCGCACATAGAAAAACATGTGGTCTCCATATAGTTCTTCTATCATTTGCAG  
>HPV41\_Nu\_9626041\_nt6272\_L1\_Tile\_rc|1  
TACAGAGCTTCACGCCGCACATAGAAAAACATGTGGTCTCCATATAGTTCTTCTATCATT  
>HPV41\_Nu\_9626041\_nt6277\_L1\_Tile\_rc|1  
TAGCATACAGAGCTTCACGCCGCACATAGAAAAACATGTGGTCTCCATATAGTTCTTCTA  
>HPV41\_Nu\_9626041\_nt6282\_L1\_Tile\_rc|2  
ATGCCTAGCATACAGAGCTTCACGCCGCACATAGAAAAACATGTGGTCTCCATATAGTTC  
>HPV41\_Nu\_9626041\_nt6287\_L1\_Tile\_rc|1  
ATTATATGCCTAGCATACAGAGCTTCACGCCGCACATAGAAAAACATGTGGTCTCCATAT  
>HPV41\_Nu\_9626041\_nt6302\_L1\_Tile\_rc|2  
TTGCCCCGCTGTTGCATTATATGCCTAGCATACAGAGCTTCACGCCGCACATAGAAAAAC  
>HPV41\_Nu\_9626041\_nt6307\_L1\_Tile\_rc|1  
CCATCTTGCCCCGCTGTTGCATTATATGCCTAGCATACAGAGCTTCACGCCGCACATAGA  
>HPV41\_Nu\_9626041\_nt6317\_L1\_Tile\_rc|1  
TGCTCAGCATCCATCTTGCCCCGCTGTTGCATTATATGCCTAGCATACAGAGCTTCACGC  
>HPV41\_Nu\_9626041\_nt6322\_L1\_Tile\_rc|2  
GAAATTGCTCAGCATCCATCTTGCCCCGCTGTTGCATTATATGCCTAGCATACAGAGCTT  
>HPV41\_Nu\_9626041\_nt6327\_L1\_Tile\_rc|1  
AGTGGGAAATTGCTCAGCATCCATCTTGCCCCGCTGTTGCATTATATGCCTAGCATACAG  
>HPV41\_Nu\_9626041\_nt6332\_L1\_Tile\_rc|1  
AGAGAAGTGGGAAATTGCTCAGCATCCATCTTGCCCCGCTGTTGCATTATATGCCTAGCA  
>HPV41\_Nu\_9626041\_nt6337\_L1\_Tile\_rc|1  
TGTACAGAGAAGTGGGAAATTGCTCAGCATCCATCTTGCCCCGCTGTTGCATTATATGCC  
>HPV41\_Nu\_9626041\_nt6342\_L1\_Tile\_rc|2  
GTCTATGTACAGAGAAGTGGGAAATTGCTCAGCATCCATCTTGCCCCGCTGTTGCATTAT  
>HPV41\_Nu\_9626041\_nt6352\_L1\_Tile\_rc|1  
CTACAGAGGAGTCTATGTACAGAGAAGTGGGAAATTGCTCAGCATCCATCTTGCCCCGCT  
>HPV41\_Nu\_9626041\_nt6357\_L1\_Tile\_rc|1  
ACCTTCTACAGAGGAGTCTATGTACAGAGAAGTGGGAAATTGCTCAGCATCCATCTTGCC  
>HPV41\_Nu\_9626041\_nt6362\_L1\_Tile\_rc|2  
TTCTCACCTTCTACAGAGGAGTCTATGTACAGAGAAGTGGGAAATTGCTCAGCATCCATC  
>HPV41\_Nu\_9626041\_nt6367\_L1\_Tile\_rc|1  
TTAATTTCTCACCTTCTACAGAGGAGTCTATGTACAGAGAAGTGGGAAATTGCTCAGCAT  
>HPV41\_Nu\_9626041\_nt6372\_L1\_Tile\_rc|1  
GGAATTTAATTTCTCACCTTCTACAGAGGAGTCTATGTACAGAGAAGTGGGAAATTGCTC  
>HPV41\_Nu\_9626041\_nt6377\_L1\_Tile\_rc|1  
TGCAAGGAATTTAATTTCTCACCTTCTACAGAGGAGTCTATGTACAGAGAAGTGGGAAAT  
>HPV41\_Nu\_9626041\_nt6387\_L1\_Tile\_rc|1  
ATCAGTGCGCTGCAAGGAATTTAATTTCTCACCTTCTACAGAGGAGTCTATGTACAGAGA  
>HPV41\_Nu\_9626041\_nt6392\_L1\_Tile\_rc|1  
TACCTATCAGTGCGCTGCAAGGAATTTAATTTCTCACCTTCTACAGAGGAGTCTATGTAC  
>HPV41\_Nu\_9626041\_nt6397\_L1\_Tile\_rc|1  
TGAAATACCTATCAGTGCGCTGCAAGGAATTTAATTTCTCACCTTCTACAGAGGAGTCTA  
>HPV41\_Nu\_9626041\_nt6402\_L1\_Tile\_rc|2  
TGTCATGAAATACCTATCAGTGCGCTGCAAGGAATTTAATTTCTCACCTTCTACAGAGGA  
>HPV41\_Nu\_9626041\_nt6407\_L1\_Tile\_rc|1  
CTGGGTGTCATGAAATACCTATCAGTGCGCTGCAAGGAATTTAATTTCTCACCTTCTACA  
>HPV41\_Nu\_9626041\_nt6417\_L1\_Tile\_rc|1  
CAGGGAGCCGCTGGGTGTCATGAAATACCTATCAGTGCGCTGCAAGGAATTTAATTTCTC  
>HPV41\_Nu\_9626041\_nt6422\_L1\_Tile\_rc|2  
GCTACCAGGGAGCCGCTGGGTGTCATGAAATACCTATCAGTGCGCTGCAAGGAATTTAAT  
>HPV41\_Nu\_9626041\_nt6427\_L1\_Tile\_rc|1  
CAGTAGCTACCAGGGAGCCGCTGGGTGTCATGAAATACCTATCAGTGCGCTGCAAGGAAT  
>HPV41\_Nu\_9626041\_nt6447\_L1\_Tile\_rc|1

CCTGTTAAACAGCTGCTGCTCAGTAGCTACCAGGGAGCCGCTGGGTGTCATGAAATACCT  
>HPV41\_Nu\_9626041\_nt6457\_L1\_Tile\_rc|1  
GCCAAAAGGCCTGTTAAACAGCTGCTGCTCAGTAGCTACCAGGGAGCCGCTGGGTGTCA  
>HPV41\_Nu\_9626041\_nt6517\_L1\_Tile\_rc|1  
ATGTTACAAAGGCCTCGTTGTGCCACAGTATGCCATTGTTATGGCCCTGGGATCTCTGCA  
>HPV41\_Nu\_9626041\_nt6522\_L1\_Tile\_rc|2  
AACCAATGTTACAAAGGCCTCGTTGTGCCACAGTATGCCATTGTTATGGCCCTGGGATCT  
>HPV41\_Nu\_9626041\_nt6547\_L1\_Tile\_rc|1  
TAAAGTTAGTTCCCCTGGTAGTGTCAACCAATGTTACAAAGGCCTCGTTGTGCCACAGTA  
>HPV41\_Nu\_9626041\_nt6552\_L1\_Tile\_rc|1  
GATGGTAAAGTTAGTTCCCCTGGTAGTGTCAACCAATGTTACAAAGGCCTCGTTGTGCCA  
>HPV41\_Nu\_9626041\_nt6557\_L1\_Tile\_rc|1  
ACACTGATGGTAAAGTTAGTTCCCCTGGTAGTGTCAACCAATGTTACAAAGGCCTCGTTG  
>HPV41\_Nu\_9626041\_nt6567\_L1\_Tile\_rc|1  
CCCCTCAGGAACACTGATGGTAAAGTTAGTTCCCCTGGTAGTGTCAACCAATGTTACAAA  
>HPV41\_Nu\_9626041\_nt6577\_L1\_Tile\_rc|1  
AAGAAGCATCCCCCTCAGGAACACTGATGGTAAAGTTAGTTCCCCTGGTAGTGTCAACCA  
>HPV41\_Nu\_9626041\_nt6582\_L1\_Tile\_rc|2  
ATATGAAGAAGCATCCCCCTCAGGAACACTGATGGTAAAGTTAGTTCCCCTGGTAGTGTC  
>HPV41\_Nu\_9626041\_nt6587\_L1\_Tile\_rc|1  
TTGTTATATGAAGAAGCATCCCCCTCAGGAACACTGATGGTAAAGTTAGTTCCCCTGGTA  
>HPV41\_Nu\_9626041\_nt6592\_L1\_Tile\_rc|1  
TAGAATTGTTATATGAAGAAGCATCCCCCTCAGGAACACTGATGGTAAAGTTAGTTCCCC  
>HPV41\_Nu\_9626041\_nt6597\_L1\_Tile\_rc|1  
AAACTTAGAATTGTTATATGAAGAAGCATCCCCCTCAGGAACACTGATGGTAAAGTTAGT  
>HPV41\_Nu\_9626041\_nt6602\_L1\_Tile\_rc|2  
TCAAAAAACTTAGAATTGTTATATGAAGAAGCATCCCCCTCAGGAACACTGATGGTAAAG  
>HPV41\_Nu\_9626041\_nt6607\_L1\_Tile\_rc|1  
AAAACCTCAAAAAACTTAGAATTGTTATATGAAGAAGCATCCCCCTCAGGAACACTGATGG  
>HPV41\_Nu\_9626041\_nt6627\_L1\_Tile\_rc|1  
AAACTCCTCGGTGTGCCTTAAAAACTCAAAAAACTTAGAATTGTTATATGAAGAAGCATC  
>HPV41\_Nu\_9626041\_nt6632\_L1\_Tile\_rc|1  
AGCTGAAACTCCTCGGTGTGCCTTAAAAACTCAAAAAACTTAGAATTGTTATATGAAGAA  
>HPV41\_Nu\_9626041\_nt6637\_L1\_Tile\_rc|1  
AGGCAAGCTGAAACTCCTCGGTGTGCCTTAAAAACTCAAAAAACTTAGAATTGTTATATG  
>HPV41\_Nu\_9626041\_nt6642\_L1\_Tile\_rc|2  
AATAAAGGCAAGCTGAAACTCCTCGGTGTGCCTTAAAAACTCAAAAAACTTAGAATTGTT  
>HPV41\_Nu\_9626041\_nt6657\_L1\_Tile\_rc|1  
CTTACACAGCTGTAGAATAAAGGCAAGCTGAAACTCCTCGGTGTGCCTTAAAAACTCAAA  
>HPV41\_Nu\_9626041\_nt6662\_L1\_Tile\_rc|2  
TCTACCTTACACAGCTGTAGAATAAAGGCAAGCTGAAACTCCTCGGTGTGCCTTAAAAAC  
>HPV41\_Nu\_9626041\_nt6667\_L1\_Tile\_rc|1  
TAAGGTCTACCTTACACAGCTGTAGAATAAAGGCAAGCTGAAACTCCTCGGTGTGCCTTA  
>HPV41\_Nu\_9626041\_nt6672\_L1\_Tile\_rc|1  
AGGGGTAAAGGTCTACCTTACACAGCTGTAGAATAAAGGCAAGCTGAAACTCCTCGGTGTG  
>HPV41\_Nu\_9626041\_nt6677\_L1\_Tile\_rc|1  
TTCTCAGGGGTAAAGGTCTACCTTACACAGCTGTAGAATAAAGGCAAGCTGAAACTCCTCG  
>HPV41\_Nu\_9626041\_nt6687\_L1\_Tile\_rc|1  
GTAAGCCAAATTCTCAGGGGTAAAGGTCTACCTTACACAGCTGTAGAATAAAGGCAAGCTG  
>HPV41\_Nu\_9626041\_nt6692\_L1\_Tile\_rc|1  
TGTATGTAAGCCAAATTCTCAGGGGTAAAGGTCTACCTTACACAGCTGTAGAATAAAGGCA  
>HPV41\_Nu\_9626041\_nt6697\_L1\_Tile\_rc|1  
TTGTGTGTATGTAAGCCAAATTCTCAGGGGTAAAGGTCTACCTTACACAGCTGTAGAATAA  
>HPV41\_Nu\_9626041\_nt6702\_L1\_Tile\_rc|2  
ATCCATTGTGTGTATGTAAGCCAAATTCTCAGGGGTAAAGGTCTACCTTACACAGCTGTAG



>HPV41\_Nu\_9626041\_nt6707\_L1\_Tile\_rc|1  
GATGGATCCATTGTGTGTATGTAAGCCAAATTCTCAGGGGTAAGGTCTACCTTACACAGC  
>HPV41\_Nu\_9626041\_nt6712\_L1\_Tile\_rc|1  
TAATGGATGGATCCATTGTGTGTATGTAAGCCAAATTCTCAGGGGTAAGGTCTACCTTAC  
>HPV41\_Nu\_9626041\_nt6722\_L1\_Tile\_rc|2  
CAGTCTTCAATAATGGATGGATCCATTGTGTGTATGTAAGCCAAATTCTCAGGGGTAAGG  
>HPV41\_Nu\_9626041\_nt6732\_L1\_Tile\_rc|1  
AGCTAAATGCCAGTCTTCAATAATGGATGGATCCATTGTGTGTATGTAAGCCAAATTCTC  
>HPV41\_Nu\_9626041\_nt6742\_L1\_Tile\_rc|2  
GTGAAGTGACAGCTAAATGCCAGTCTTCAATAATGGATGGATCCATTGTGTGTATGTAAG  
>HPV41\_Nu\_9626041\_nt6747\_L1\_Tile\_rc|1  
GGGAGGTGAAGTGACAGCTAAATGCCAGTCTTCAATAATGGATGGATCCATTGTGTGTAT  
>HPV41\_Nu\_9626041\_nt6752\_L1\_Tile\_rc|1  
GAATTGGGAGGTGAAGTGACAGCTAAATGCCAGTCTTCAATAATGGATGGATCCATTGTG  
>HPV41\_Nu\_9626041\_nt6757\_L1\_Tile\_rc|1  
GTACAGAATTGGGAGGTGAAGTGACAGCTAAATGCCAGTCTTCAATAATGGATGGATCCA  
>HPV41\_Nu\_9626041\_nt6762\_L1\_Tile\_rc|2  
CTCCAGTACAGAATTGGGAGGTGAAGTGACAGCTAAATGCCAGTCTTCAATAATGGATGG  
>HPV41\_Nu\_9626041\_nt6767\_L1\_Tile\_rc|1  
TGATCCTCCAGTACAGAATTGGGAGGTGAAGTGACAGCTAAATGCCAGTCTTCAATAATG  
>HPV41\_Nu\_9626041\_nt6772\_L1\_Tile\_rc|1  
TATAATGATCCTCCAGTACAGAATTGGGAGGTGAAGTGACAGCTAAATGCCAGTCTTCAA  
>HPV41\_Nu\_9626041\_nt6777\_L1\_Tile\_rc|1  
GTACCTATAATGATCCTCCAGTACAGAATTGGGAGGTGAAGTGACAGCTAAATGCCAGTC  
>HPV41\_Nu\_9626041\_nt6782\_L1\_Tile\_rc|2  
AGTATGTACCTATAATGATCCTCCAGTACAGAATTGGGAGGTGAAGTGACAGCTAAATGC  
>HPV41\_Nu\_9626041\_nt6787\_L1\_Tile\_rc|1  
TGGACAGTATGTACCTATAATGATCCTCCAGTACAGAATTGGGAGGTGAAGTGACAGCTA  
>HPV41\_Nu\_9626041\_nt6792\_L1\_Tile\_rc|1  
TGCAATGGACAGTATGTACCTATAATGATCCTCCAGTACAGAATTGGGAGGTGAAGTGAC  
>HPV41\_Nu\_9626041\_nt6797\_L1\_Tile\_rc|1  
TTAGTTGCAATGGACAGTATGTACCTATAATGATCCTCCAGTACAGAATTGGGAGGTGAA  
>HPV41\_Nu\_9626041\_nt6802\_L1\_Tile\_rc|2  
GACATTTAGTTGCAATGGACAGTATGTACCTATAATGATCCTCCAGTACAGAATTGGGAG  
>HPV41\_Nu\_9626041\_nt6807\_L1\_Tile\_rc|1  
AGAGGGACATTTAGTTGCAATGGACAGTATGTACCTATAATGATCCTCCAGTACAGAATT  
>HPV41\_Nu\_9626041\_nt6812\_L1\_Tile\_rc|1  
TCCTTAGAGGGACATTTAGTTGCAATGGACAGTATGTACCTATAATGATCCTCCAGTACA  
>HPV41\_Nu\_9626041\_nt6822\_L1\_Tile\_rc|2  
ATCATCTGCATCCTTAGAGGGACATTTAGTTGCAATGGACAGTATGTACCTATAATGATC  
>HPV41\_Nu\_9626041\_nt6832\_L1\_Tile\_rc|1  
CAGTGGAGGTATCATCTGCATCCTTAGAGGGACATTTAGTTGCAATGGACAGTATGTACC  
>HPV41\_Nu\_9626041\_nt6837\_L1\_Tile\_rc|1  
TGGGTCACTGGAGGTATCATCTGCATCCTTAGAGGGACATTTAGTTGCAATGGACAGTAT  
>HPV41\_Nu\_9626041\_nt6872\_L1\_Tile\_rc|1  
CGTAGATCAACCTCCCAAACTTAAGATCTTTGTATGGGTCAGTGGAGGTATCATCTGCA  
>HPV41\_Nu\_9626041\_nt6877\_L1\_Tile\_rc|1  
GATCCCGTAGATCAACCTCCCAAACTTAAGATCTTTGTATGGGTCAGTGGAGGTATCAT  
>HPV41\_Nu\_9626041\_nt6887\_L1\_Tile\_rc|1  
TCTGTCATACGATCCCGTAGATCAACCTCCCAAACTTAAGATCTTTGTATGGGTCAGTG  
>HPV41\_Nu\_9626041\_nt6927\_L1\_Tile\_rc|1  
AAACAAAAAACTTCCTGCCAAGGGGAGTCTGGTCCAATTGCTCTGTCATACGATCCCGTAG  
>HPV41\_Nu\_9626041\_nt6932\_L1\_Tile\_rc|1  
GTTTGAACAAAACTTCCTGCCAAGGGGAGTCTGGTCCAATTGCTCTGTCATACGATCC  
>HPV41\_Nu\_9626041\_nt6942\_L1\_Tile\_rc|2

AGTGATACCAGTTTGAACAAAAAATTCTGCCAAGGGGAGTCTGGTCCAATTGCTCTGT  
>HPV41\_Nu\_9626041\_nt6947\_L1\_Tile\_rc|1  
GACTGAGTGATACCAGTTTGAACAAAAAATTCTGCCAAGGGGAGTCTGGTCCAATTGC  
>HPV41\_Nu\_9626041\_nt6952\_L1\_Tile\_rc|1  
ATGATGACTGAGTGATACCAGTTTGAACAAAAAATTCTGCCAAGGGGAGTCTGGTCCA  
>HPV41\_Nu\_9626041\_nt6962\_L1\_Tile\_rc|2  
CGCTTATTTGATGATGACTGAGTGATACCAGTTTGAACAAAAAATTCTGCCAAGGGGA  
>HPV41\_Nu\_9626041\_nt6967\_L1\_Tile\_rc|1  
ACACCCGCTTATTTGATGATGACTGAGTGATACCAGTTTGAACAAAAAATTCTGCCAA  
>HPV41\_Nu\_9626041\_nt6972\_L1\_Tile\_rc|1  
CGTGGACACCCGCTTATTTGATGATGACTGAGTGATACCAGTTTGAACAAAAAATTCTCT  
>HPV41\_Nu\_9626041\_nt6977\_L1\_Tile\_rc|1  
GACTGCGTGGACACCCGCTTATTTGATGATGACTGAGTGATACCAGTTTGAACAAAAAC  
>HPV41\_Nu\_9626041\_nt6982\_L1\_Tile\_rc|2  
CAGTAGACTGCGTGGACACCCGCTTATTTGATGATGACTGAGTGATACCAGTTTGAACA  
>HPV41\_Nu\_9626041\_nt6987\_L1\_Tile\_rc|1  
AAGGGCAGTAGACTGCGTGGACACCCGCTTATTTGATGATGACTGAGTGATACCAGTTTG  
>HPV41\_Nu\_9626041\_nt6992\_L1\_Tile\_rc|1  
GTAGTAAGGGCAGTAGACTGCGTGGACACCCGCTTATTTGATGATGACTGAGTGATACCA  
>HPV41\_Nu\_9626041\_nt6997\_L1\_Tile\_rc|1  
TGTAGGTAGTAAGGGCAGTAGACTGCGTGGACACCCGCTTATTTGATGATGACTGAGTGA  
>HPV41\_Nu\_9626041\_nt7012\_L1\_Tile\_rc|1  
GCTTAGTAGGCCGCCTGTAGGTAGTAAGGGCAGTAGACTGCGTGGACACCCGCTTATTTG  
>HPV41\_Nu\_9626041\_nt7022\_L1\_Tile\_rc|2  
TTCCGGCGGCGCTTAGTAGGCCGCCTGTAGGTAGTAAGGGCAGTAGACTGCGTGGACACC  
>HPV41\_Nu\_9626041\_nt7029\_L1\_Tile\_rc|1  
TTAAGCCTTCCGGCGGCGCTTAGTAGGCCGCCTGTAGGTAGTAAGGGCAGTAGACTGCGT  
>HPV42\_Alpha\_333211\_nt5942\_L1\_Tile\_rc|2  
CTTTTTGTAAATAGAGTAATAAGGGTGACCAACAACCAATAGCCTAGAACTGCTGGCATGG  
>HPV42\_Alpha\_333211\_nt5947\_L1\_Tile\_rc|1  
TTGGCCTTTTTGTAAATAGAGTAATAAGGGTGACCAACAACCAATAGCCTAGAACTGCTGG  
>HPV42\_Alpha\_333211\_nt5952\_L1\_Tile\_rc|1  
CTTATTTGGCCTTTTTGTAAATAGAGTAATAAGGGTGACCAACAACCAATAGCCTAGAACT  
>HPV42\_Alpha\_333211\_nt5957\_L1\_Tile\_rc|1  
GATGTCTTATTTGGCCTTTTTGTAAATAGAGTAATAAGGGTGACCAACAACCAATAGCCTA  
>HPV42\_Alpha\_333211\_nt5962\_L1\_Tile\_rc|2  
GGATAGATGTCTTATTTGGCCTTTTTGTAAATAGAGTAATAAGGGTGACCAACAACCAATA  
>HPV42\_Alpha\_333211\_nt5967\_L1\_Tile\_rc|1  
TTTGGGGATAGATGTCTTATTTGGCCTTTTTGTAAATAGAGTAATAAGGGTGACCAACAAC  
>HPV42\_Alpha\_333211\_nt5972\_L1\_Tile\_rc|1  
GACACTTTGGGGATAGATGTCTTATTTGGCCTTTTTGTAAATAGAGTAATAAGGGTGACCA  
>HPV42\_Alpha\_333211\_nt5977\_L1\_Tile\_rc|1  
AACCAGACACTTTGGGGATAGATGTCTTATTTGGCCTTTTTGTAAATAGAGTAATAAGGGT  
>HPV42\_Alpha\_333211\_nt5982\_L1\_Tile\_rc|2  
CTGTAAACCAGACACTTTGGGGATAGATGTCTTATTTGGCCTTTTTGTAAATAGAGTAATA  
>HPV42\_Alpha\_333211\_nt5992\_L1\_Tile\_rc|1  
ATACTCTGTACTGTAAACCAGACACTTTGGGGATAGATGTCTTATTTGGCCTTTTTGTAA  
>HPV42\_Alpha\_333211\_nt5997\_L1\_Tile\_rc|1  
TCTAAATACTCTGTACTGTAAACCAGACACTTTGGGGATAGATGTCTTATTTGGCCTTTT  
>HPV42\_Alpha\_333211\_nt6002\_L1\_Tile\_rc|2  
CTAACTCTAAATACTCTGTACTGTAAACCAGACACTTTGGGGATAGATGTCTTATTTGGC  
>HPV42\_Alpha\_333211\_nt6007\_L1\_Tile\_rc|1  
GGAGCCTAACTCTAAATACTCTGTACTGTAAACCAGACACTTTGGGGATAGATGTCTTAT  
>HPV42\_Alpha\_333211\_nt6052\_L1\_Tile\_rc|1  
GGTTATATAAATTAGTTTCAGGCAATGTAAACTTATTAGGATCAGGGAGCCTAACTCTAA

>HPV42\_Alpha\_333211\_nt6217\_L1\_Tile\_rc|1  
AAACATTTTCCCTATTGTCTGTACCAGGGCCTCCACCATATGTAGGCGCATTTTCAGTAT  
>HPV42\_Alpha\_333211\_nt6222\_L1\_Tile\_rc|2  
CATAGAAACATTTTCCCTATTGTCTGTACCAGGGCCTCCACCATATGTAGGCGCATTTTC  
>HPV42\_Alpha\_333211\_nt6347\_L1\_Tile\_rc|1  
CTATTTTTTTAATTCTAATGGTGGGCAGTCACCATTGGACTGTGGTGTACAGGCAGTACCT  
>HPV42\_Alpha\_333211\_nt6352\_L1\_Tile\_rc|1  
TAAAACTATTTTTTAATTCTAATGGTGGGCAGTCACCATTGGACTGTGGTGTACAGGCAG  
>HPV42\_Alpha\_333211\_nt6357\_L1\_Tile\_rc|1  
CTGAATAAAACTATTTTTTTAATTCTAATGGTGGGCAGTCACCATTGGACTGTGGTGTACA  
>HPV42\_Alpha\_333211\_nt6422\_L1\_Tile\_rc|2  
GCTTTGGAGGATTGTAAAGCACCAAAATCTAGTGCCCCAAACCCTACATCCACCATATCC  
>HPV42\_Alpha\_333211\_nt6442\_L1\_Tile\_rc|2  
CAATATCCAAAGGTACCTCAGCTTTGGAGGATTGTAAAGCACCAAAATCTAGTGCCCCAA  
>HPV42\_Alpha\_333211\_nt6447\_L1\_Tile\_rc|1  
ATTTACAATATCCAAAGGTACCTCAGCTTTGGAGGATTGTAAAGCACCAAAATCTAGTGC  
>HPV42\_Alpha\_333211\_nt6452\_L1\_Tile\_rc|1  
ATTGAATTTACAATATCCAAAGGTACCTCAGCTTTGGAGGATTGTAAAGCACCAAAATCT  
>HPV42\_Alpha\_333211\_nt6457\_L1\_Tile\_rc|1  
TAGTAATTGAATTTACAATATCCAAAGGTACCTCAGCTTTGGAGGATTGTAAAGCACCAA  
>HPV42\_Alpha\_333211\_nt6462\_L1\_Tile\_rc|2  
ATATTTAGTAATTGAATTTACAATATCCAAAGGTACCTCAGCTTTGGAGGATTGTAAAGC  
>HPV42\_Alpha\_333211\_nt6467\_L1\_Tile\_rc|1  
TCAGGATATTTAGTAATTGAATTTACAATATCCAAAGGTACCTCAGCTTTGGAGGATTGT  
>HPV42\_Alpha\_333211\_nt6472\_L1\_Tile\_rc|1  
AGTAATCAGGATATTTAGTAATTGAATTTACAATATCCAAAGGTACCTCAGCTTTGGAGG  
>HPV42\_Alpha\_333211\_nt6477\_L1\_Tile\_rc|1  
TTTTAAGTAATCAGGATATTTAGTAATTGAATTTACAATATCCAAAGGTACCTCAGCTTT  
>HPV42\_Alpha\_333211\_nt6612\_L1\_Tile\_rc|1  
ATTAGCAGCCTTGGTATACAGTTCATCAGGTACAGGTTACCAATTGCGCCAGCCCTATT  
>HPV42\_Alpha\_333211\_nt6622\_L1\_Tile\_rc|2  
CAGATGCATTATTAGCAGCCTTGGTATACAGTTCATCAGGTACAGGTTACCAATTGCGC  
>HPV42\_Alpha\_333211\_nt6632\_L1\_Tile\_rc|1  
TTATGTCTGCCAGATGCATTATTAGCAGCCTTGGTATACAGTTCATCAGGTACAGGTTCA  
>HPV42\_Alpha\_333211\_nt6642\_L1\_Tile\_rc|2  
ACTACCTAAATTATGTCTGCCAGATGCATTATTAGCAGCCTTGGTATACAGTTCATCAGG  
>HPV42\_Alpha\_333211\_nt6647\_L1\_Tile\_rc|1  
ATACTACTACCTAAATTATGTCTGCCAGATGCATTATTAGCAGCCTTGGTATACAGTTCA  
>HPV42\_Alpha\_333211\_nt6852\_L1\_Tile\_rc|1  
ATTAGCAGCTGTATATGTATCACCAGATGTTGCAGTGGCACACAAAGTCATGTTAGTACT  
>HPV42\_Alpha\_333211\_nt6857\_L1\_Tile\_rc|1  
TTAAAATTAGCAGCTGTATATGTATCACCAGATGTTGCAGTGGCACACAAAGTCATGTTA  
>HPV42\_Alpha\_333211\_nt6862\_L1\_Tile\_rc|2  
ATTCCTTAAATTAGCAGCTGTATATGTATCACCAGATGTTGCAGTGGCACACAAAGTCA  
>HPV42\_Alpha\_333211\_nt6877\_L1\_Tile\_rc|1  
CAGCATGTCTTAAATATTCCTTAAATTAGCAGCTGTATATGTATCACCAGATGTTGCAG  
>HPV42\_Alpha\_333211\_nt6972\_L1\_Tile\_rc|1  
TAATATGTTAGGATTCATATTGTGTATATATGACATAACTTCAACAGTTAATGTTATTTT  
>HPV42\_Alpha\_333211\_nt7057\_L1\_Tile\_rc|1  
AGCGAATAGCTTCTGATTGTACATACCTATAACTATCTTCTAAAGTTCCTGAAGGTGGTG  
>HPV42\_Alpha\_333211\_nt7062\_L1\_Tile\_rc|2  
CTGACAGCGAATAGCTTCTGATTGTACATACCTATAACTATCTTCTAAAGTTCCTGAAGG  
>HPV42\_Alpha\_333211\_nt7067\_L1\_Tile\_rc|1  
TTAGCCTGACAGCGAATAGCTTCTGATTGTACATACCTATAACTATCTTCTAAAGTTCCT  
>HPV42\_Alpha\_333211\_nt7072\_L1\_Tile\_rc|1

TTACCTTAGCCTGACAGCGAATAGCTTCTGATTGTACATACCTATAACTATCTTCTAAAG  
>HPV42\_Alpha\_333211\_nt7077\_L1\_Tile\_rc|1  
CGTTGTTACCTTAGCCTGACAGCGAATAGCTTCTGATTGTACATACCTATAACTATCTTC  
>HPV42\_Alpha\_333211\_nt7082\_L1\_Tile\_rc|2  
TCTGGCGTTGTTACCTTAGCCTGACAGCGAATAGCTTCTGATTGTACATACCTATAACTA  
>HPV42\_Alpha\_333211\_nt7097\_L1\_Tile\_rc|1  
TAAGGATCCTTTTTTCTGGCGTTGTTACCTTAGCCTGACAGCGAATAGCTTCTGATTGT  
>HPV42\_Alpha\_333211\_nt7102\_L1\_Tile\_rc|2  
CTGAATAAGGATCCTTTTTTCTGGCGTTGTTACCTTAGCCTGACAGCGAATAGCTTCTG  
>HPV42\_Alpha\_333211\_nt7107\_L1\_Tile\_rc|1  
AAAGTCTGAATAAGGATCCTTTTTTCTGGCGTTGTTACCTTAGCCTGACAGCGAATAGC  
>HPV42\_Alpha\_333211\_nt7247\_L1\_Tile\_rc|1  
TTAGCTGTAGACGCCTTTCGTTTACCTACAGACAGTTTAGGCCTTGCACGCAACCCGGCC  
>HPV42\_Alpha\_333211\_nt7252\_L1\_Tile\_rc|1  
CAGATTTAGCTGTAGACGCCTTTCGTTTACCTACAGACAGTTTAGGCCTTGCACGCAACC  
>HPV42\_Alpha\_333211\_nt7257\_L1\_Tile\_rc|1  
AGAAACAGATTTAGCTGTAGACGCCTTTCGTTTACCTACAGACAGTTTAGGCCTTGCACG  
>HPV42\_Alpha\_333211\_nt7262\_L1\_Tile\_rc|2  
GCTGAAGAAACAGATTTAGCTGTAGACGCCTTTCGTTTACCTACAGACAGTTTAGGCCTT  
>HPV42\_Alpha\_333211\_nt7267\_L1\_Tile\_rc|1  
GTTTAGCTGAAGAAACAGATTTAGCTGTAGACGCCTTTCGTTTACCTACAGACAGTTTAG  
>HPV42\_Alpha\_333211\_nt7272\_L1\_Tile\_rc|1  
CTTACGTTTAGCTGAAGAAACAGATTTAGCTGTAGACGCCTTTCGTTTACCTACAGACAG  
>HPV42\_Alpha\_333211\_nt7277\_L1\_Tile\_rc|1  
GTTTTCTTACGTTTAGCTGAAGAAACAGATTTAGCTGTAGACGCCTTTCGTTTACCTACA  
>HPV42\_Alpha\_333211\_nt7287\_L1\_Tile\_rc|1  
CTATTTGTGTGTTTTCTTACGTTTAGCTGAAGAAACAGATTTAGCTGTAGACGCCTTTCG  
>HPV43\_Alpha\_40804474\_nt5863\_L1\_Tile\_rc|1  
AGAGGAATTTTAAAGGGGAAATATGGGTGACCCACTGCAAGCAAACGTGAACTGCCAGC  
>HPV43\_Alpha\_40804474\_nt5868\_L1\_Tile\_rc|1  
TTACCAGAGGAATTTTAAAGGGGAAATATGGGTGACCCACTGCAAGCAAACGTGAACTG  
>HPV43\_Alpha\_40804474\_nt5873\_L1\_Tile\_rc|1  
TTATTTTACCAGAGGAATTTTAAAGGGGAAATATGGGTGACCCACTGCAAGCAAACGTG  
>HPV43\_Alpha\_40804474\_nt5878\_L1\_Tile\_rc|1  
TACAGTTATTTTACCAGAGGAATTTTAAAGGGGAAATATGGGTGACCCACTGCAAGCAA  
>HPV43\_Alpha\_40804474\_nt5883\_L1\_Tile\_rc|1  
TTAGGTACAGTTATTTTACCAGAGGAATTTTAAAGGGGAAATATGGGTGACCCACTGCA  
>HPV43\_Alpha\_40804474\_nt5893\_L1\_Tile\_rc|1  
ACCAGAAACCTTAGGTACAGTTATTTTACCAGAGGAATTTTAAAGGGGAAATATGGGTG  
>HPV43\_Alpha\_40804474\_nt5898\_L1\_Tile\_rc|1  
TGATAACCAGAAACCTTAGGTACAGTTATTTTACCAGAGGAATTTTAAAGGGGAAATAT  
>HPV43\_Alpha\_40804474\_nt6518\_L1\_Tile\_rc|1  
ACATATCGGAAGGCACAACGTCGCCAGTTTACCAGCTTTATTAATAAATGTCTAAGGA  
>HPV43\_Alpha\_40804474\_nt6528\_L1\_Tile\_rc|1  
CCAGCAATATACATATCGGAAGGCACAACGTCGCCAGTTTACCAGCTTTATTAATAA  
>HPV43\_Alpha\_40804474\_nt6533\_L1\_Tile\_rc|1  
TAGAGCCAGCAATATACATATCGGAAGGCACAACGTCGCCAGTTTACCAGCTTTATTA  
>HPV43\_Alpha\_40804474\_nt6538\_L1\_Tile\_rc|1  
GGTATTAGAGCCAGCAATATACATATCGGAAGGCACAACGTCGCCAGTTTACCAGCTTT  
>HPV43\_Alpha\_40804474\_nt6543\_L1\_Tile\_rc|1  
GACCTGGTATTAGAGCCAGCAATATACATATCGGAAGGCACAACGTCGCCAGTTTACCA  
>HPV43\_Alpha\_40804474\_nt6548\_L1\_Tile\_rc|1  
TTTTGGACCTGGTATTAGAGCCAGCAATATACATATCGGAAGGCACAACGTCGCCAGTTT  
>HPV43\_Alpha\_40804474\_nt6553\_L1\_Tile\_rc|1  
TGCAATTTTGGACCTGGTATTAGAGCCAGCAATATACATATCGGAAGGCACAACGTCGCC

>HPV43\_Alpha\_40804474\_nt6558\_L1\_Tile\_rc|1  
CTATCTGCAATTTTGGACCTGGTATTAGAGCCAGCAATATACATATCGGAAGGCACAACG  
>HPV43\_Alpha\_40804474\_nt6563\_L1\_Tile\_rc|1  
ATATACTATCTGCAATTTTGGACCTGGTATTAGAGCCAGCAATATACATATCGGAAGGCA  
>HPV43\_Alpha\_40804474\_nt6568\_L1\_Tile\_rc|1  
AAAATATATACTATCTGCAATTTTGGACCTGGTATTAGAGCCAGCAATATACATATCGGA  
>HPV43\_Alpha\_40804474\_nt6573\_L1\_Tile\_rc|1  
GTAGAAAAATATATACTATCTGCAATTTTGGACCTGGTATTAGAGCCAGCAATATACATA  
>HPV43\_Alpha\_40804474\_nt6578\_L1\_Tile\_rc|1  
TGGGTGTAGAAAAATATATACTATCTGCAATTTTGGACCTGGTATTAGAGCCAGCAATAT  
>HPV43\_Alpha\_40804474\_nt6583\_L1\_Tile\_rc|1  
CCCACTGGGTGTAGAAAAATATATACTATCTGCAATTTTGGACCTGGTATTAGAGCCAGC  
>HPV43\_Alpha\_40804474\_nt6588\_L1\_Tile\_rc|1  
AAAGACCCACTGGGTGTAGAAAAATATATACTATCTGCAATTTTGGACCTGGTATTAGAG  
>HPV43\_Alpha\_40804474\_nt6593\_L1\_Tile\_rc|1  
TAACCAAAGACCCACTGGGTGTAGAAAAATATATACTATCTGCAATTTTGGACCTGGTAT  
>HPV43\_Alpha\_40804474\_nt6598\_L1\_Tile\_rc|1  
AGAAGTAACCAAAGACCCACTGGGTGTAGAAAAATATATACTATCTGCAATTTTGGACCT  
>HPV43\_Alpha\_40804474\_nt6753\_L1\_Tile\_rc|1  
CTGGGCACAGTAGGGTCAGTAGAGGCACATAACGTTAAGTTTGTACTACGAGTGGTATCT  
>HPV43\_Alpha\_40804474\_nt6788\_L1\_Tile\_rc|1  
GCAGGTATTCCCTAAACTTTGCATTGTGCATATGTACTGGGCACAGTAGGGTCAGTAGAGG  
>HPV43\_Alpha\_40804474\_nt6888\_L1\_Tile\_rc|1  
AATGTGGGATCCATAGTATGAATATATGTCATAACCTCTGGGTTTAGCGTTATTATGCAT  
>HPV43\_Alpha\_40804474\_nt6893\_L1\_Tile\_rc|1  
CTAATAATGTGGGATCCATAGTATGAATATATGTCATAACCTCTGGGTTTAGCGTTATTA  
>HPV43\_Alpha\_40804474\_nt6973\_L1\_Tile\_rc|1  
AATGGCCTTGTTAGACAAAAAGCGATAAGTATCTTCCAAAGAAGCAGAGGCAGGTGGGGA  
>HPV43\_Alpha\_40804474\_nt7068\_L1\_Tile\_rc|1  
TGTGCAGAAAACCTTTTCTGTAAGATTTATATCCCAAATGTATACTTTTATAGGGATCC  
>HPV43\_Alpha\_40804474\_nt7193\_L1\_Tile\_rc|1  
TGCGTTTAGAGGCAGGGGCAGACGTAGAGGAGGATGGTGCAGAACGCTTTACAGTTTTTA  
>HPV43\_Alpha\_40804474\_nt7203\_L1\_Tile\_rc|1  
TTAGTTTTTTTGCCTTTAGAGGCAGGGGCAGACGTAGAGGAGGATGGTGCAGAACGCTTT  
>HPV44\_Alpha\_1020242\_nt6475\_L1\_Tile\_rc|1  
ATTTTTACTAGCACTTTTAATAACCAGATCCTGGGAAACGTCCTCACCAACTGTTCCAGC  
>HPV44\_Alpha\_1020242\_nt6480\_L1\_Tile\_rc|1  
ACAGTATTTTTACTAGCACTTTTAATAACCAGATCCTGGGAAACGTCCTCACCAACTGTT  
>HPV44\_Alpha\_1020242\_nt6720\_L1\_Tile\_rc|1  
CGCATGTATTGCTTATATTGTTCACTAGTATATGTAGACGGAGGGGACTGTGTAGTGGCA  
>HPV45\_Alpha\_397022\_nt5731\_L1\_Tile\_rc|1  
TGTTTATTACCTGCACCATTAGGTACAACCCTAAAATATGGATTGCCTACAGTTAATAAT  
>HPV45\_Alpha\_397022\_nt5736\_L1\_Tile\_rc|1  
CAGCCTGTTTATTACCTGCACCATTAGGTACAACCCTAAAATATGGATTGCCTACAGTTA  
>HPV45\_Alpha\_397022\_nt5751\_L1\_Tile\_rc|1  
CGGATACCTTAGGAACAGCCTGTTTATTACCTGCACCATTAGGTACAACCCTAAAATATG  
>HPV45\_Alpha\_397022\_nt5756\_L1\_Tile\_rc|1  
ATATGCGGATACCTTAGGAACAGCCTGTTTATTACCTGCACCATTAGGTACAACCCTAAA  
>HPV45\_Alpha\_397022\_nt5761\_L1\_Tile\_rc|1  
TACTGATATGCGGATACCTTAGGAACAGCCTGTTTATTACCTGCACCATTAGGTACAACC  
>HPV45\_Alpha\_397022\_nt5971\_L1\_Tile\_rc|1  
GTAATAACAGCTGTAGCTGCATGAGCACTTTCTGTATCATCCAATTTATTATAAAATGGA  
>HPV45\_Alpha\_397022\_nt6136\_L1\_Tile\_rc|1  
ATAATGGTGTTTTAAAGTTCCAAAGGAGGACAGTCACCAGGTTGCAATTGTGCAGGTTTA  
>HPV45\_Alpha\_397022\_nt6416\_L1\_Tile\_rc|1

AGGGGTTTCACGCATATTAGCGCTAGTGCCTTTAATATATAGGTCCGTAGGTACTGTGTC  
>HPV45\_Alpha\_397022\_nt6426\_L1\_Tile\_rc|1  
CACAACTGCCAGGGTTTCACGCATATTAGCGCTAGTGCCTTTAATATATAGGTCCGTAG  
>HPV45\_Alpha\_397022\_nt6936\_L1\_Tile\_rc|1  
AATCGGAGGAAAAATTTTTCCTTTAGGTCAACAGTCCAAAACTTTAATTTATCATATGGAT  
>HPV45\_Alpha\_397022\_nt6941\_L1\_Tile\_rc|1  
ATCCAAATCGGAGGAAAAATTTTTCCTTTAGGTCAACAGTCCAAAACTTTAATTTATCATA  
>HPV45\_Alpha\_397022\_nt6946\_L1\_Tile\_rc|1  
TATTGATCCAAATCGGAGGAAAAATTTTTCCTTTAGGTCAACAGTCCAAAACTTTAATTTA  
>HPV45\_Alpha\_397022\_nt7056\_L1\_Tile\_rc|1  
GCCTAGATGCAGTAGATGCAGTAGACGTGGAAGCAGCAGGACGCTTACGAGGTCCTATGG  
>HPV45\_Alpha\_397022\_nt7091\_L1\_Tile\_rc|1  
TTATTTCTTACTACGTATACGTACACGTTTGGCAGGCCTAGATGCAGTAGATGCAGTAGA  
>HPV47\_Beta\_333062\_nt6269\_L1\_Tile\_rc|1  
TCTTTTGAGTTTGTGATATAGGAATTACTGTTTTCTGTATCTTTTACCTTATTAAAATAT  
>HPV47\_Beta\_333062\_nt6289\_L1\_Tile\_rc|1  
AAGAGGTGTCTTGTCTGTCATCTTTTGAGTTTGTGATATAGGAATTACTGTTTTCTGTAT  
>HPV47\_Beta\_333062\_nt6294\_L1\_Tile\_rc|1  
ATCAAAAGAGGTGTCTTGTCTGTCATCTTTTGAGTTTGTGATATAGGAATTACTGTTTTC  
>HPV47\_Beta\_333062\_nt6729\_L1\_Tile\_rc|1  
AGTGCTCTGAGCCTGACCCGTAGCACCAGGAATGTAAAATTGATTTTTTCATATTACCATT  
>HPV47\_Beta\_333062\_nt6934\_L1\_Tile\_rc|1  
TTATGTCCCCCTGCCTGAGAGTAAACAGAGATGCTGAAATTTGTATTTCTTGTGTTGTCTA  
>HPV47\_Beta\_333062\_nt6939\_L1\_Tile\_rc|1  
ATCCTTTATGTCCCCCTGCCTGAGAGTAAACAGAGATGCTGAAATTTGTATTTCTTGTGTT  
>HPV47\_Beta\_333062\_nt6944\_L1\_Tile\_rc|1  
TGTATATCCTTTATGTCCCCCTGCCTGAGAGTAAACAGAGATGCTGAAATTTGTATTTCTT  
>HPV47\_Beta\_333062\_nt6949\_L1\_Tile\_rc|1  
AATCCTGTATATCCTTTATGTCCCCCTGCCTGAGAGTAAACAGAGATGCTGAAATTTGTAT  
>HPV47\_Beta\_333062\_nt6954\_L1\_Tile\_rc|1  
ATTATAATCCTGTATATCCTTTATGTCCCCCTGCCTGAGAGTAAACAGAGATGCTGAAATT  
>HPV47\_Beta\_333062\_nt6964\_L1\_Tile\_rc|1  
AATTGTCTGCATTATAATCCTGTATATCCTTTATGTCCCCCTGCCTGAGAGTAAACAGAGA  
>HPV47\_Beta\_333062\_nt6969\_L1\_Tile\_rc|1  
TCTAAAATTGTCTGCATTATAATCCTGTATATCCTTTATGTCCCCCTGCCTGAGAGTAAAC  
>HPV47\_Beta\_333062\_nt6974\_L1\_Tile\_rc|1  
TACTCTCTAAAATTGTCTGCATTATAATCCTGTATATCCTTTATGTCCCCCTGCCTGAGAG  
>HPV47\_Beta\_333062\_nt6984\_L1\_Tile\_rc|1  
ATGTCTTTGATACTCTCTAAAATTGTCTGCATTATAATCCTGTATATCCTTTATGTCCCC  
>HPV47\_Beta\_333062\_nt7164\_L1\_Tile\_rc|1  
AGTGGCCAAAGATTCTAGATATCTATATGTATCCTGAATAGGGTTGTCTGGAGTAGGCAC  
>HPV47\_Beta\_333062\_nt7179\_L1\_Tile\_rc|1  
CTTTTCAGGACACCTAGTGGCCAAAGATTCTAGATATCTATATGTATCCTGAATAGGGTT  
>HPV47\_Beta\_333062\_nt7184\_L1\_Tile\_rc|1  
GGAGACTTTTCAGGACACCTAGTGGCCAAAGATTCTAGATATCTATATGTATCCTGAATA  
>HPV47\_Beta\_333062\_nt7189\_L1\_Tile\_rc|1  
TTGGAGGAGACTTTTCAGGACACCTAGTGGCCAAAGATTCTAGATATCTATATGTATCCT  
>HPV47\_Beta\_333062\_nt7204\_L1\_Tile\_rc|1  
GGTCAACCTTCTCTTTTGGAGGAGACTTTTCAGGACACCTAGTGGCCAAAGATTCTAGAT  
>HPV47\_Beta\_333062\_nt7214\_L1\_Tile\_rc|1  
CCTTTGTAGGGGTCAACCTTCTCTTTTGGAGGAGACTTTTCAGGACACCTAGTGGCCAAA  
>HPV47\_Beta\_333062\_nt7224\_L1\_Tile\_rc|1  
AAAGTTTAAACCTTTGTAGGGGTCAACCTTCTCTTTTGGAGGAGACTTTTCAGGACACCT  
>HPV47\_Beta\_333062\_nt7264\_L1\_Tile\_rc|1  
CTAAATCCAGGGAAGGCGCTCTGTCATATCGACATCCCAAAGTTTAAACCTTTGTAGG

>HPV48\_Gamma\_9628542\_nt5248\_L1\_Tile\_rc|1  
ATATACATCCGTTTCTTGACGTATTCATCAGTGCGCAACACACGAGCTACTGGTGCAC  
>HPV48\_Gamma\_9628542\_nt5253\_L1\_Tile\_rc|1  
TAAAAATATACATCCGTTTCTTGACGTATTCATCAGTGCGCAACACACGAGCTACTGGT  
>HPV48\_Gamma\_9628542\_nt5258\_L1\_Tile\_rc|1  
TTGTATAAAAAATATACATCCGTTTCTTGACGTATTCATCAGTGCGCAACACACGAGCTA  
>HPV48\_Gamma\_9628542\_nt5263\_L1\_Tile\_rc|1  
AGTGCTTGTATAAAAAATATACATCCGTTTCTTGACGTATTCATCAGTGCGCAACACACG  
>HPV48\_Gamma\_9628542\_nt5273\_L1\_Tile\_rc|1  
AAAGTCTTTTCAGTGCTTGTATAAAAAATATACATCCGTTTCTTGACGTATTCATCAGTGC  
>HPV48\_Gamma\_9628542\_nt5278\_L1\_Tile\_rc|1  
TATTAAAAGTCTTTCAGTGCTTGTATAAAAAATATACATCCGTTTCTTGACGTATTCATC  
>HPV48\_Gamma\_9628542\_nt5283\_L1\_Tile\_rc|1  
CCAACTATTAAAAGTCTTTCAGTGCTTGTATAAAAAATATACATCCGTTTCTTGACGTAT  
>HPV48\_Gamma\_9628542\_nt5288\_L1\_Tile\_rc|1  
GATTACCAACTATTAAAAGTCTTTCAGTGCTTGTATAAAAAATATACATCCGTTTCTTGCA  
>HPV48\_Gamma\_9628542\_nt5293\_L1\_Tile\_rc|1  
ATAAGGATTACCAACTATTAAAAGTCTTTCAGTGCTTGTATAAAAAATATACATCCGTTTC  
>HPV48\_Gamma\_9628542\_nt5298\_L1\_Tile\_rc|1  
TCAAAATAAGGATTACCAACTATTAAAAGTCTTTCAGTGCTTGTATAAAAAATATACATCC  
>HPV48\_Gamma\_9628542\_nt5303\_L1\_Tile\_rc|1  
CAACATCAAAATAAGGATTACCAACTATTAAAAGTCTTTCAGTGCTTGTATAAAAAATATA  
>HPV48\_Gamma\_9628542\_nt5308\_L1\_Tile\_rc|1  
GTTTTCAACATCAAAATAAGGATTACCAACTATTAAAAGTCTTTCAGTGCTTGTATAAAA  
>HPV48\_Gamma\_9628542\_nt5313\_L1\_Tile\_rc|1  
TCTCTGTTTTCAACATCAAAATAAGGATTACCAACTATTAAAAGTCTTTCAGTGCTTGTA  
>HPV48\_Gamma\_9628542\_nt5318\_L1\_Tile\_rc|1  
TAGTGTCTCTGTTTTCAACATCAAAATAAGGATTACCAACTATTAAAAGTCTTTCAGTGC  
>HPV48\_Gamma\_9628542\_nt5323\_L1\_Tile\_rc|1  
TGTTATAGTGTCTCTGTTTTCAACATCAAAATAAGGATTACCAACTATTAAAAGTCTTTC  
>HPV48\_Gamma\_9628542\_nt5328\_L1\_Tile\_rc|1  
GGTACTGTTATAGTGTCTCTGTTTTCAACATCAAAATAAGGATTACCAACTATTAAAAGT  
>HPV48\_Gamma\_9628542\_nt5333\_L1\_Tile\_rc|1  
CTTTAGGTACTGTTATAGTGTCTCTGTTTTCAACATCAAAATAAGGATTACCAACTATTA  
>HPV48\_Gamma\_9628542\_nt5338\_L1\_Tile\_rc|1  
AGAACTTTAGGTACTGTTATAGTGTCTCTGTTTTCAACATCAAAATAAGGATTACCAAC  
>HPV48\_Gamma\_9628542\_nt5343\_L1\_Tile\_rc|1  
TTAGCAGAACTTTAGGTACTGTTATAGTGTCTCTGTTTTCAACATCAAAATAAGGATTA  
>HPV48\_Gamma\_9628542\_nt5348\_L1\_Tile\_rc|1  
ATTGATTAGCAGAACTTTAGGTACTGTTATAGTGTCTCTGTTTTCAACATCAAAATAAG  
>HPV48\_Gamma\_9628542\_nt5353\_L1\_Tile\_rc|1  
TCGGTATTGATTAGCAGAACTTTAGGTACTGTTATAGTGTCTCTGTTTTCAACATCAAA  
>HPV48\_Gamma\_9628542\_nt5373\_L1\_Tile\_rc|1  
GGAAGTTTACATCTAAATACTCGGTATTGATTAGCAGAACTTTAGGTACTGTTATAGTG  
>HPV48\_Gamma\_9628542\_nt5408\_L1\_Tile\_rc|1  
AATTTTTATCAACTAGAGCAAACCTTGTTAGGATCTGGAAGTTTACATCTAAATACTCGGT  
>HPV48\_Gamma\_9628542\_nt5418\_L1\_Tile\_rc|1  
GAATTATATAAATTTTTATCAACTAGAGCAAACCTTGTTAGGATCTGGAAGTTTACATCTA  
>HPV48\_Gamma\_9628542\_nt5453\_L1\_Tile\_rc|1  
AACCAACAAGTTTCCAAACTAAACGTTTCCTTATCTGAATTATATAAATTTTTATCAACTA  
>HPV48\_Gamma\_9628542\_nt5458\_L1\_Tile\_rc|1  
TTCCAAACCAACAAGTTTCCAAACTAAACGTTTCCTTATCTGAATTATATAAATTTTTATC  
>HPV48\_Gamma\_9628542\_nt5463\_L1\_Tile\_rc|1  
CCTACTTCCAAACCAACAAGTTTCCAAACTAAACGTTTCCTTATCTGAATTATATAAATTT  
>HPV48\_Gamma\_9628542\_nt5483\_L1\_Tile\_rc|1

CGCCAAGAGGACCCCCTCTGCCTACTTCCAAACCAACAAGTTTCCAAACTAAACGTTTCCT  
>HPV48\_Gamma\_9628542\_nt5488\_L1\_Tile\_rc|1  
TCCTACGCCAAGAGGACCCCCTCTGCCTACTTCCAAACCAACAAGTTTCCAAACTAAACG  
>HPV48\_Gamma\_9628542\_nt5493\_L1\_Tile\_rc|1  
GTAGATCCTACGCCAAGAGGACCCCCTCTGCCTACTTCCAAACCAACAAGTTTCCAAACT  
>HPV48\_Gamma\_9628542\_nt5498\_L1\_Tile\_rc|1  
GACCTGTAGATCCTACGCCAAGAGGACCCCCTCTGCCTACTTCCAAACCAACAAGTTTCC  
>HPV48\_Gamma\_9628542\_nt5503\_L1\_Tile\_rc|1  
AGGATGACCTGTAGATCCTACGCCAAGAGGACCCCCTCTGCCTACTTCCAAACCAACAAG  
>HPV48\_Gamma\_9628542\_nt5508\_L1\_Tile\_rc|1  
AGTAAAGGATGACCTGTAGATCCTACGCCAAGAGGACCCCCTCTGCCTACTTCCAAACCA  
>HPV48\_Gamma\_9628542\_nt5513\_L1\_Tile\_rc|1  
TATTTAGTAAAGGATGACCTGTAGATCCTACGCCAAGAGGACCCCCTCTGCCTACTTCCA  
>HPV48\_Gamma\_9628542\_nt5518\_L1\_Tile\_rc|1  
TATCTTATTTAGTAAAGGATGACCTGTAGATCCTACGCCAAGAGGACCCCCTCTGCCTAC  
>HPV48\_Gamma\_9628542\_nt5523\_L1\_Tile\_rc|1  
TCCCCTATCTTATTTAGTAAAGGATGACCTGTAGATCCTACGCCAAGAGGACCCCCTCTG  
>HPV48\_Gamma\_9628542\_nt5588\_L1\_Tile\_rc|1  
CCATGGAAACATTTTGTCTCTCATCCTTTGTTTGTCTCTCTAAATAAAAGCTAGGATTTT  
>HPV48\_Gamma\_9628542\_nt5603\_L1\_Tile\_rc|1  
GACTCTGCTTAGGATCCATGGAAACATTTTGTCTCTCATCCTTTGTTTGTCTCTCTAAAT  
>HPV48\_Gamma\_9628542\_nt5613\_L1\_Tile\_rc|1  
ATTAGTATCTGACTCTGCTTAGGATCCATGGAAACATTTTGTCTCTCATCCTTTGTTTGT  
>HPV48\_Gamma\_9628542\_nt5638\_L1\_Tile\_rc|1  
TCCAGTGGCTGGAGCACAACCAACTATTAGTATCTGACTCTGCTTAGGATCCATGGAAAC  
>HPV48\_Gamma\_9628542\_nt5643\_L1\_Tile\_rc|1  
TATTCTCCAGTGGCTGGAGCACAACCAACTATTAGTATCTGACTCTGCTTAGGATCCATG  
>HPV48\_Gamma\_9628542\_nt5648\_L1\_Tile\_rc|1  
CCCAGTATTCTCCAGTGGCTGGAGCACAACCAACTATTAGTATCTGACTCTGCTTAGGAT  
>HPV48\_Gamma\_9628542\_nt5653\_L1\_Tile\_rc|1  
TAAATCCCAGTATTCTCCAGTGGCTGGAGCACAACCAACTATTAGTATCTGACTCTGCTT  
>HPV48\_Gamma\_9628542\_nt5658\_L1\_Tile\_rc|1  
TTAGCTAAATCCCAGTATTCTCCAGTGGCTGGAGCACAACCAACTATTAGTATCTGACTC  
>HPV48\_Gamma\_9628542\_nt5663\_L1\_Tile\_rc|1  
ATGGTTTAGCTAAATCCCAGTATTCTCCAGTGGCTGGAGCACAACCAACTATTAGTATCT  
>HPV48\_Gamma\_9628542\_nt5673\_L1\_Tile\_rc|1  
AAATCATTGCATGGTTTAGCTAAATCCCAGTATTCTCCAGTGGCTGGAGCACAACCAACT  
>HPV48\_Gamma\_9628542\_nt5698\_L1\_Tile\_rc|1  
AATTGGTGGTGCAGCCCCGTTTTCCAAATCATTGCATGGTTTAGCTAAATCCCAGTATTC  
>HPV48\_Gamma\_9628542\_nt5703\_L1\_Tile\_rc|1  
AGTTGAATTGGTGGTGCAGCCCCGTTTTCCAAATCATTGCATGGTTTAGCTAAATCCCAG  
>HPV48\_Gamma\_9628542\_nt5708\_L1\_Tile\_rc|1  
TAACTAGTTGAATTGGTGGTGCAGCCCCGTTTTCCAAATCATTGCATGGTTTAGCTAAAT  
>HPV48\_Gamma\_9628542\_nt5713\_L1\_Tile\_rc|1  
AGTATTAAGTGAATTGGTGGTGCAGCCCCGTTTTCCAAATCATTGCATGGTTTAGC  
>HPV48\_Gamma\_9628542\_nt5723\_L1\_Tile\_rc|1  
CCTGAATAACAGTATTAAGTGAATTGGTGGTGCAGCCCCGTTTTCCAAATCATTGC  
>HPV48\_Gamma\_9628542\_nt5728\_L1\_Tile\_rc|1  
ACCATCCTGAATAACAGTATTAAGTGAATTGGTGGTGCAGCCCCGTTTTCCAAATC  
>HPV48\_Gamma\_9628542\_nt5733\_L1\_Tile\_rc|1  
ATATCACCATCCTGAATAACAGTATTAAGTGAATTGGTGGTGCAGCCCCGTTTTCC  
>HPV48\_Gamma\_9628542\_nt5798\_L1\_Tile\_rc|1  
GAGGGACGCCAGCACGATCCTGCATCAACTTAGGAAAATTAGCAGCCCCAAAGCCTATAT  
>HPV48\_Gamma\_9628542\_nt5803\_L1\_Tile\_rc|1  
CTCTAGAGGGACGCCAGCACGATCCTGCATCAACTTAGGAAAATTAGCAGCCCCAAAGCC



>HPV48\_Gamma\_9628542\_nt5808\_L1\_Tile\_rc|1  
ATTAACTCTAGAGGGACGCCAGCACGATCCTGCATCAACTTAGGAAAATTAGCAGCCCCA  
>HPV48\_Gamma\_9628542\_nt5813\_L1\_Tile\_rc|1  
AATCTATTAACCTCTAGAGGGACGCCAGCACGATCCTGCATCAACTTAGGAAAATTAGCAG  
>HPV48\_Gamma\_9628542\_nt5818\_L1\_Tile\_rc|1  
AATAGAATCTATTAACCTCTAGAGGGACGCCAGCACGATCCTGCATCAACTTAGGAAAATT  
>HPV48\_Gamma\_9628542\_nt5823\_L1\_Tile\_rc|1  
ATACTAATAGAATCTATTAACCTCTAGAGGGACGCCAGCACGATCCTGCATCAACTTAGGA  
>HPV48\_Gamma\_9628542\_nt5833\_L1\_Tile\_rc|1  
ATCTGGCCATATACTAATAGAATCTATTAACCTCTAGAGGGACGCCAGCACGATCCTGCAT  
>HPV48\_Gamma\_9628542\_nt5838\_L1\_Tile\_rc|1  
AAAAAATCTGGCCATATACTAATAGAATCTATTAACCTCTAGAGGGACGCCAGCACGATCC  
>HPV48\_Gamma\_9628542\_nt5843\_L1\_Tile\_rc|1  
TCTTTAAAAAATCTGGCCATATACTAATAGAATCTATTAACCTCTAGAGGGACGCCAGCAC  
>HPV48\_Gamma\_9628542\_nt5853\_L1\_Tile\_rc|1  
TCTTTGGTCATCTTTAAAAAATCTGGCCATATACTAATAGAATCTATTAACCTCTAGAGGG  
>HPV48\_Gamma\_9628542\_nt5858\_L1\_Tile\_rc|1  
AAATATCTTTGGTCATCTTTAAAAAATCTGGCCATATACTAATAGAATCTATTAACCTCTA  
>HPV48\_Gamma\_9628542\_nt5868\_L1\_Tile\_rc|1  
GAGTCTCCATAAAATATCTTTGGTCATCTTTAAAAAATCTGGCCATATACTAATAGAATCT  
>HPV48\_Gamma\_9628542\_nt5888\_L1\_Tile\_rc|1  
GTTTACCAAAAAAGAAGACAGAGTCTCCATAAATATCTTTGGTCATCTTTAAAAAATCTG  
>HPV48\_Gamma\_9628542\_nt5893\_L1\_Tile\_rc|1  
TTCCCGTTTACCAAAAAAGAAGACAGAGTCTCCATAAATATCTTTGGTCATCTTTAAAAA  
>HPV48\_Gamma\_9628542\_nt5898\_L1\_Tile\_rc|1  
CATTGTTCCCGTTTACCAAAAAAGAAGACAGAGTCTCCATAAATATCTTTGGTCATCTTT  
>HPV48\_Gamma\_9628542\_nt5903\_L1\_Tile\_rc|1  
CATAACATTGTTCCCGTTTACCAAAAAAGAAGACAGAGTCTCCATAAATATCTTTGGTCA  
>HPV48\_Gamma\_9628542\_nt5918\_L1\_Tile\_rc|1  
CAAAAAGATGACGAGCATAACATTGTTCCCGTTTACCAAAAAAGAAGACAGAGTCTCCAT  
>HPV48\_Gamma\_9628542\_nt5928\_L1\_Tile\_rc|1  
CCAGCTCTTGCAAAAAGATGACGAGCATAACATTGTTCCCGTTTACCAAAAAAGAAGACA  
>HPV48\_Gamma\_9628542\_nt5933\_L1\_Tile\_rc|1  
TTTGGCCAGCTCTTGCAAAAAGATGACGAGCATAACATTGTTCCCGTTTACCAAAAAAGA  
>HPV48\_Gamma\_9628542\_nt5938\_L1\_Tile\_rc|1  
CCCCATTTGGCCAGCTCTTGCAAAAAGATGACGAGCATAACATTGTTCCCGTTTACCAAA  
>HPV48\_Gamma\_9628542\_nt5948\_L1\_Tile\_rc|1  
GTATAGGCTCCCCCATTTGGCCAGCTCTTGCAAAAAGATGACGAGCATAACATTGTTCCC  
>HPV48\_Gamma\_9628542\_nt5953\_L1\_Tile\_rc|1  
TGTTGGTATAGGCTCCCCCATTTGGCCAGCTCTTGCAAAAAGATGACGAGCATAACATTG  
>HPV48\_Gamma\_9628542\_nt5958\_L1\_Tile\_rc|1  
TTTTCTGTTGGTATAGGCTCCCCCATTTGGCCAGCTCTTGCAAAAAGATGACGAGCATAA  
>HPV48\_Gamma\_9628542\_nt5963\_L1\_Tile\_rc|1  
CTCCATTTTCTGTTGGTATAGGCTCCCCCATTTGGCCAGCTCTTGCAAAAAGATGACGAG  
>HPV48\_Gamma\_9628542\_nt5968\_L1\_Tile\_rc|1  
ATATACTCCATTTTCTGTTGGTATAGGCTCCCCCATTTGGCCAGCTCTTGCAAAAAGATG  
>HPV48\_Gamma\_9628542\_nt5973\_L1\_Tile\_rc|1  
ATATAATATACTCCATTTTCTGTTGGTATAGGCTCCCCCATTTGGCCAGCTCTTGCAAAA  
>HPV48\_Gamma\_9628542\_nt5988\_L1\_Tile\_rc|1  
GCAGAATCAGGAGTTATATAATATACTCCATTTTCTGTTGGTATAGGCTCCCCCATTTGG  
>HPV48\_Gamma\_9628542\_nt5993\_L1\_Tile\_rc|1  
GATCGGCAGAATCAGGAGTTATATAATATACTCCATTTTCTGTTGGTATAGGCTCCCCCA  
>HPV48\_Gamma\_9628542\_nt5998\_L1\_Tile\_rc|1  
GTTTTGATCGGCAGAATCAGGAGTTATATAATATACTCCATTTTCTGTTGGTATAGGCTC  
>HPV48\_Gamma\_9628542\_nt6008\_L1\_Tile\_rc|1

AAGATCTGTTGTTTTGATCGGCAGAATCAGGAGTTATATAATATACTCCATTTTCTGTTG  
>HPV48\_Gamma\_9628542\_nt6013\_L1\_Tile\_rc|1  
ATGAGAAGATCTGTTGTTTTGATCGGCAGAATCAGGAGTTATATAATATACTCCATTTTC  
>HPV48\_Gamma\_9628542\_nt6018\_L1\_Tile\_rc|1  
CCTAAATGAGAAGATCTGTTGTTTTGATCGGCAGAATCAGGAGTTATATAATATACTCCA  
>HPV48\_Gamma\_9628542\_nt6023\_L1\_Tile\_rc|1  
AAGATCCTAAATGAGAAGATCTGTTGTTTTGATCGGCAGAATCAGGAGTTATATAATATA  
>HPV48\_Gamma\_9628542\_nt6028\_L1\_Tile\_rc|1  
CACAGAAGATCCTAAATGAGAAGATCTGTTGTTTTGATCGGCAGAATCAGGAGTTATATA  
>HPV48\_Gamma\_9628542\_nt6033\_L1\_Tile\_rc|1  
AAATACACAGAAGATCCTAAATGAGAAGATCTGTTGTTTTGATCGGCAGAATCAGGAGTT  
>HPV48\_Gamma\_9628542\_nt6038\_L1\_Tile\_rc|1  
TTGTAAAATACACAGAAGATCCTAAATGAGAAGATCTGTTGTTTTGATCGGCAGAATCAG  
>HPV48\_Gamma\_9628542\_nt6043\_L1\_Tile\_rc|1  
TGGTGTGTGAAAATACACAGAAGATCCTAAATGAGAAGATCTGTTGTTTTGATCGGCAGA  
>HPV48\_Gamma\_9628542\_nt6058\_L1\_Tile\_rc|1  
ATTC AAGGATCCACTTGGTGTGTGAAAATACACAGAAGATCCTAAATGAGAAGATCTGTT  
>HPV48\_Gamma\_9628542\_nt6063\_L1\_Tile\_rc|1  
CTAGTATTCAAGGATCCACTTGGTGTGTGAAAATACACAGAAGATCCTAAATGAGAAGAT  
>HPV48\_Gamma\_9628542\_nt6068\_L1\_Tile\_rc|1  
AATCGCTAGTATTCAAGGATCCACTTGGTGTGTGAAAATACACAGAAGATCCTAAATGAG  
>HPV48\_Gamma\_9628542\_nt6178\_L1\_Tile\_rc|1  
CACATTATGAGTATTATCAAAAACCTGTAATAAACAGCTCATTTCCCCAACAAATGCCATT  
>HPV48\_Gamma\_9628542\_nt6183\_L1\_Tile\_rc|1  
AAATTCACATTATGAGTATTATCAAAAACCTGTAATAAACAGCTCATTTCCCCAACAAATG  
>HPV48\_Gamma\_9628542\_nt6188\_L1\_Tile\_rc|1  
TAGTAAAATTCACATTATGAGTATTATCAAAAACCTGTAATAAACAGCTCATTTCCCCAAC  
>HPV48\_Gamma\_9628542\_nt6193\_L1\_Tile\_rc|1  
ACTAATAGTAAAATTCACATTATGAGTATTATCAAAAACCTGTAATAAACAGCTCATTTCC  
>HPV48\_Gamma\_9628542\_nt6198\_L1\_Tile\_rc|1  
TTAACACTAATAGTAAAATTCACATTATGAGTATTATCAAAAACCTGTAATAAACAGCTCA  
>HPV48\_Gamma\_9628542\_nt6203\_L1\_Tile\_rc|1  
CATTCTTAACACTAATAGTAAAATTCACATTATGAGTATTATCAAAAACCTGTAATAAACA  
>HPV48\_Gamma\_9628542\_nt6208\_L1\_Tile\_rc|1  
TTTATCATTCCTTAACACTAATAGTAAAATTCACATTATGAGTATTATCAAAAACCTGTAAT  
>HPV48\_Gamma\_9628542\_nt6213\_L1\_Tile\_rc|1  
GCAGTTTTTATCATTCCTTAACACTAATAGTAAAATTCACATTATGAGTATTATCAAAAAC  
>HPV48\_Gamma\_9628542\_nt6218\_L1\_Tile\_rc|1  
TTAATGCAGTTTTATCATTCCTTAACACTAATAGTAAAATTCACATTATGAGTATTATCAA  
>HPV48\_Gamma\_9628542\_nt6223\_L1\_Tile\_rc|1  
TTCAGTTAATGCAGTTTTATCATTCCTTAACACTAATAGTAAAATTCACATTATGAGTATT  
>HPV48\_Gamma\_9628542\_nt6228\_L1\_Tile\_rc|1  
TAGTTTTTCAGTTAATGCAGTTTTATCATTCCTTAACACTAATAGTAAAATTCACATTATGA  
>HPV48\_Gamma\_9628542\_nt6233\_L1\_Tile\_rc|1  
CTATGTAGTTTTTCAGTTAATGCAGTTTTATCATTCCTTAACACTAATAGTAAAATTCACAT  
>HPV48\_Gamma\_9628542\_nt6238\_L1\_Tile\_rc|1  
ATTATCTATGTAGTTTTTCAGTTAATGCAGTTTTATCATTCCTTAACACTAATAGTAAAATT  
>HPV48\_Gamma\_9628542\_nt6243\_L1\_Tile\_rc|1  
TAACCATTATCTATGTAGTTTTTCAGTTAATGCAGTTTTATCATTCCTTAACACTAATAGTA  
>HPV48\_Gamma\_9628542\_nt6248\_L1\_Tile\_rc|1  
ATTTGTAAACCATTATCTATGTAGTTTTTCAGTTAATGCAGTTTTATCATTCCTTAACACTAA  
>HPV48\_Gamma\_9628542\_nt6253\_L1\_Tile\_rc|1  
ATTATATTTGTAAACCATTATCTATGTAGTTTTTCAGTTAATGCAGTTTTATCATTCCTTAAC  
>HPV48\_Gamma\_9628542\_nt6258\_L1\_Tile\_rc|1  
GCATTATTATATTTGTAAACCATTATCTATGTAGTTTTTCAGTTAATGCAGTTTTATCATTC

>HPV48\_Gamma\_9628542\_nt6263\_L1\_Tile\_rc|1  
AATCTGCATTATTATATTTGTAACCATTATCTATGTAGTTTTTCAGTTAATGCAGTTTTAT  
>HPV48\_Gamma\_9628542\_nt6268\_L1\_Tile\_rc|1  
TTTAAATCTGCATTATTATATTTGTAACCATTATCTATGTAGTTTTTCAGTTAATGCAGT  
>HPV48\_Gamma\_9628542\_nt6273\_L1\_Tile\_rc|1  
TATTGTTTAAATCTGCATTATTATATTTGTAACCATTATCTATGTAGTTTTTCAGTTAAT  
>HPV48\_Gamma\_9628542\_nt6278\_L1\_Tile\_rc|1  
GAAGATATTGTTTAAATCTGCATTATTATATTTGTAACCATTATCTATGTAGTTTTTCAG  
>HPV48\_Gamma\_9628542\_nt6283\_L1\_Tile\_rc|1  
ATGTGGAAGATATTGTTTAAATCTGCATTATTATATTTGTAACCATTATCTATGTAGTT  
>HPV48\_Gamma\_9628542\_nt6288\_L1\_Tile\_rc|1  
TCTGTATGTCGAAGATATTGTTTAAATCTGCATTATTATATTTGTAACCATTATCTATG  
>HPV48\_Gamma\_9628542\_nt6293\_L1\_Tile\_rc|1  
ATTCTTCTGTATGTCGAAGATATTGTTTAAATCTGCATTATTATATTTGTAACCATTAT  
>HPV48\_Gamma\_9628542\_nt6298\_L1\_Tile\_rc|1  
TTCATATTCTTCTGTATGTCGAAGATATTGTTTAAATCTGCATTATTATATTTGTAACC  
>HPV48\_Gamma\_9628542\_nt6303\_L1\_Tile\_rc|1  
TCTATTTTCATATTCTTCTGTATGTCGAAGATATTGTTTAAATCTGCATTATTATTTG  
>HPV48\_Gamma\_9628542\_nt6308\_L1\_Tile\_rc|1  
CCAACTCTATTTTCATATTCTTCTGTATGTCGAAGATATTGTTTAAATCTGCATTATTAT  
>HPV48\_Gamma\_9628542\_nt6313\_L1\_Tile\_rc|1  
AAAAACCAACTCTATTTTCATATTCTTCTGTATGTCGAAGATATTGTTTAAATCTGCATT  
>HPV48\_Gamma\_9628542\_nt6318\_L1\_Tile\_rc|1  
AACTGAAAAACCAACTCTATTTTCATATTCTTCTGTATGTCGAAGATATTGTTTAAATCT  
>HPV48\_Gamma\_9628542\_nt6323\_L1\_Tile\_rc|1  
TGCATAACTGAAAAACCAACTCTATTTTCATATTCTTCTGTATGTCGAAGATATTGTTTAA  
>HPV48\_Gamma\_9628542\_nt6348\_L1\_Tile\_rc|1  
AGAACATCTGCAGTCAAGTTCACCTTTCGATAACTGAAAAACCAACTCTATTTTCATATTCT  
>HPV48\_Gamma\_9628542\_nt6353\_L1\_Tile\_rc|1  
GTGCCAGAACATCTGCAGTCAAGTTCACCTTTCGATAACTGAAAAACCAACTCTATTTTCAT  
>HPV48\_Gamma\_9628542\_nt6363\_L1\_Tile\_rc|1  
ACGTGTAAATGTGCCAGAACATCTGCAGTCAAGTTCACCTTTCGATAACTGAAAAACCAAC  
>HPV48\_Gamma\_9628542\_nt6368\_L1\_Tile\_rc|1  
TCATAACGTGTAAATGTGCCAGAACATCTGCAGTCAAGTTCACCTTTCGATAACTGAAAAA  
>HPV48\_Gamma\_9628542\_nt6373\_L1\_Tile\_rc|1  
GGGATTTCATAACGTGTAAATGTGCCAGAACATCTGCAGTCAAGTTCACCTTTCGATAACTG  
>HPV48\_Gamma\_9628542\_nt6378\_L1\_Tile\_rc|1  
ATTCTGGGATTTCATAACGTGTAAATGTGCCAGAACATCTGCAGTCAAGTTCACCTTTCGAT  
>HPV48\_Gamma\_9628542\_nt6383\_L1\_Tile\_rc|1  
CTAATATTCTGGGATTTCATAACGTGTAAATGTGCCAGAACATCTGCAGTCAAGTTCACCT  
>HPV48\_Gamma\_9628542\_nt6388\_L1\_Tile\_rc|1  
CTCCTCTAATATTCTGGGATTTCATAACGTGTAAATGTGCCAGAACATCTGCAGTCAAGTT  
>HPV48\_Gamma\_9628542\_nt6398\_L1\_Tile\_rc|1  
CTAATTGCCACTCCTCTAATATTCTGGGATTTCATAACGTGTAAATGTGCCAGAACATCTG  
>HPV48\_Gamma\_9628542\_nt6458\_L1\_Tile\_rc|1  
CCATGGATTTGATATACCTGTAAGTATCTTCAATGCCCGTTGGAGCTGGTGAACAAAAG  
>HPV48\_Gamma\_9628542\_nt6463\_L1\_Tile\_rc|1  
AGTAGCCATGGATTTGATATACCTGTAAGTATCTTCAATGCCCGTTGGAGCTGGTGAAC  
>HPV48\_Gamma\_9628542\_nt6468\_L1\_Tile\_rc|1  
CATTTAGTAGCCATGGATTTGATATACCTGTAAGTATCTTCAATGCCCGTTGGAGCTGGT  
>HPV48\_Gamma\_9628542\_nt6473\_L1\_Tile\_rc|1  
TAGGGCATTTAGTAGCCATGGATTTGATATACCTGTAAGTATCTTCAATGCCCGTTGGAG  
>HPV48\_Gamma\_9628542\_nt6478\_L1\_Tile\_rc|1  
AGCAGTAGGGCATTTAGTAGCCATGGATTTGATATACCTGTAAGTATCTTCAATGCCCGT  
>HPV48\_Gamma\_9628542\_nt6483\_L1\_Tile\_rc|1

GGTTCAGCAGTAGGGCATTCTAGTAGCCATGGATTTGATATACCTGTAAGTATCTTCAATG  
>HPV48\_Gamma\_9628542\_nt6488\_L1\_Tile\_rc|1  
CTTCTGGTTCAGCAGTAGGGCATTCTAGTAGCCATGGATTTGATATACCTGTAAGTATCTT  
>HPV48\_Gamma\_9628542\_nt6493\_L1\_Tile\_rc|1  
GTCTTCTTCTGGTTCAGCAGTAGGGCATTCTAGTAGCCATGGATTTGATATACCTGTAAGT  
>HPV48\_Gamma\_9628542\_nt6503\_L1\_Tile\_rc|1  
ATGGATCTGTGTCTTCTTCTGGTTCAGCAGTAGGGCATTCTAGTAGCCATGGATTTGATAT  
>HPV48\_Gamma\_9628542\_nt6518\_L1\_Tile\_rc|1  
AACTGTAAGCTTTGTATGGATCTGTGTCTTCTTCTGGTTCAGCAGTAGGGCATTCTAGTAG  
>HPV48\_Gamma\_9628542\_nt6528\_L1\_Tile\_rc|1  
AAAGTCCAGAACTGTAAGCTTTGTATGGATCTGTGTCTTCTTCTGGTTCAGCAGTAGGG  
>HPV48\_Gamma\_9628542\_nt6533\_L1\_Tile\_rc|1  
TATCTAAAGTCCAGAACTGTAAGCTTTGTATGGATCTGTGTCTTCTTCTGGTTCAGCAG  
>HPV48\_Gamma\_9628542\_nt6538\_L1\_Tile\_rc|1  
TGTCATATCTAAAGTCCAGAACTGTAAGCTTTGTATGGATCTGTGTCTTCTTCTGGTTC  
>HPV48\_Gamma\_9628542\_nt6543\_L1\_Tile\_rc|1  
CGCTCTGTCATATCTAAAGTCCAGAACTGTAAGCTTTGTATGGATCTGTGTCTTCTTCT  
>HPV48\_Gamma\_9628542\_nt6548\_L1\_Tile\_rc|1  
AGAAGCGCTCTGTCATATCTAAAGTCCAGAACTGTAAGCTTTGTATGGATCTGTGTCTT  
>HPV48\_Gamma\_9628542\_nt6553\_L1\_Tile\_rc|1  
AGACGAGAAGCGCTCTGTCATATCTAAAGTCCAGAACTGTAAGCTTTGTATGGATCTGT  
>HPV48\_Gamma\_9628542\_nt6558\_L1\_Tile\_rc|1  
AAATCAGACGAGAAGCGCTCTGTCATATCTAAAGTCCAGAACTGTAAGCTTTGTATGGA  
>HPV48\_Gamma\_9628542\_nt6563\_L1\_Tile\_rc|1  
GACTTAAATCAGACGAGAAGCGCTCTGTCATATCTAAAGTCCAGAACTGTAAGCTTTGT  
>HPV48\_Gamma\_9628542\_nt6568\_L1\_Tile\_rc|1  
AAACTGACTTAAATCAGACGAGAAGCGCTCTGTCATATCTAAAGTCCAGAACTGTAAGC  
>HPV48\_Gamma\_9628542\_nt6573\_L1\_Tile\_rc|1  
AAGGAAAAGTACTTAAATCAGACGAGAAGCGCTCTGTCATATCTAAAGTCCAGAACTG  
>HPV48\_Gamma\_9628542\_nt6578\_L1\_Tile\_rc|1  
GACCCAAGGAAAAGTACTTAAATCAGACGAGAAGCGCTCTGTCATATCTAAAGTCCAGA  
>HPV48\_Gamma\_9628542\_nt6583\_L1\_Tile\_rc|1  
TTTTTCGACCCAAGGAAAAGTACTTAAATCAGACGAGAAGCGCTCTGTCATATCTAAAGT  
>HPV48\_Gamma\_9628542\_nt6588\_L1\_Tile\_rc|1  
AAAAATTTTCGACCCAAGGAAAAGTACTTAAATCAGACGAGAAGCGCTCTGTCATATCT  
>HPV48\_Gamma\_9628542\_nt6593\_L1\_Tile\_rc|1  
GATATAAAAAATTTTCGACCCAAGGAAAAGTACTTAAATCAGACGAGAAGCGCTCTGTCA  
>HPV48\_Gamma\_9628542\_nt6598\_L1\_Tile\_rc|1  
AGTTTGATATAAAAAATTTTCGACCCAAGGAAAAGTACTTAAATCAGACGAGAAGCGCTC  
>HPV48\_Gamma\_9628542\_nt6603\_L1\_Tile\_rc|1  
AAACAGTTTGATATAAAAAATTTTCGACCCAAGGAAAAGTACTTAAATCAGACGAGAAG  
>HPV48\_Gamma\_9628542\_nt6613\_L1\_Tile\_rc|1  
ACCATTTAACAACAGTTTGATATAAAAAATTTTCGACCCAAGGAAAAGTACTTAAATC  
>HPV48\_Gamma\_9628542\_nt6623\_L1\_Tile\_rc|1  
TAGCTCGTTTACCATTTAACAACAGTTTGATATAAAAAATTTTCGACCCAAGGAAAAGT  
>HPV48\_Gamma\_9628542\_nt6628\_L1\_Tile\_rc|1  
TGTTCTAGCTCGTTTACCATTTAACAACAGTTTGATATAAAAAATTTTCGACCCAAGGA  
>HPV48\_Gamma\_9628542\_nt6633\_L1\_Tile\_rc|1  
TAGTCTGTTCTAGCTCGTTTACCATTTAACAACAGTTTGATATAAAAAATTTTCGACCC  
>HPV48\_Gamma\_9628542\_nt6638\_L1\_Tile\_rc|1  
CTGTATAGTCTGTTCTAGCTCGTTTACCATTTAACAACAGTTTGATATAAAAAATTTTC  
>HPV48\_Gamma\_9628542\_nt6648\_L1\_Tile\_rc|1  
GATCCTGCAGCTGTATAGTCTGTTCTAGCTCGTTTACCATTTAACAACAGTTTGATAT  
>HPV48\_Gamma\_9628542\_nt6653\_L1\_Tile\_rc|1  
TACTAGATCCTGCAGCTGTATAGTCTGTTCTAGCTCGTTTACCATTTAACAACAGTTT

>HPV48\_Gamma\_9628542\_nt6658\_L1\_Tile\_rc|1  
TCTGGTACTAGATCCTGCAGCTGTATAGTCTGTTCTAGCTCGTTTACCATTTAACAAACC  
>HPV48\_Gamma\_9628542\_nt6663\_L1\_Tile\_rc|1  
GTAGATCTGGTACTAGATCCTGCAGCTGTATAGTCTGTTCTAGCTCGTTTACCATTTAAC  
>HPV48\_Gamma\_9628542\_nt6668\_L1\_Tile\_rc|1  
GCTTTGTAGATCTGGTACTAGATCCTGCAGCTGTATAGTCTGTTCTAGCTCGTTTACCAT  
>HPV48\_Gamma\_9628542\_nt6673\_L1\_Tile\_rc|1  
CCTACGCTTTGTAGATCTGGTACTAGATCCTGCAGCTGTATAGTCTGTTCTAGCTCGTTT  
>HPV48\_Gamma\_9628542\_nt6678\_L1\_Tile\_rc|1  
ACTCTCCTACGCTTTGTAGATCTGGTACTAGATCCTGCAGCTGTATAGTCTGTTCTAGCT  
>HPV48\_Gamma\_9628542\_nt6683\_L1\_Tile\_rc|1  
ATCTTACTCTCCTACGCTTTGTAGATCTGGTACTAGATCCTGCAGCTGTATAGTCTGTTC  
>HPV48\_Gamma\_9628542\_nt6685\_L1\_Tile\_rc|1  
CTATCTTACTCTCCTACGCTTTGTAGATCTGGTACTAGATCCTGCAGCTGTATAGTCTGT  
>HPV49\_Beta\_9627363\_nt5952\_L1\_Tile\_rc|1  
TTTGGTACTAAAATTTTAGAATTGTCTGCTGTATCTCTCACATCAAAATATGGATGTCCT  
>HPV49\_Beta\_9627363\_nt5957\_L1\_Tile\_rc|1  
AAACCTTTGGTACTAAAATTTTAGAATTGTCTGCTGTATCTCTCACATCAAAATATGGAT  
>HPV49\_Beta\_9627363\_nt6167\_L1\_Tile\_rc|1  
TATAGTTATTAGCATTTTTCAGTATCTTTGACTTTGTTAAACAATGGATGTCCTGTTGTAC  
>HPV49\_Beta\_9627363\_nt6177\_L1\_Tile\_rc|1  
GAAGTTACTATATAGTTATTAGCATTTTTCAGTATCTTTGACTTTGTTAAACAATGGATGT  
>HPV49\_Beta\_9627363\_nt6182\_L1\_Tile\_rc|2  
CTTTAGAAAGTTACTATATAGTTATTAGCATTTTTCAGTATCTTTGACTTTGTTAAACAATG  
>HPV49\_Beta\_9627363\_nt6292\_L1\_Tile\_rc|1  
ATCTGCATCACAAAGGTTTAGCAGCGTCCCAGTACTCACCCATACAAGGAGTACAACCTAT  
>HPV49\_Beta\_9627363\_nt6297\_L1\_Tile\_rc|1  
CCAGCATCTGCATCACAAAGGTTTAGCAGCGTCCCAGTACTCACCCATACAAGGAGTACAA  
>HPV49\_Beta\_9627363\_nt6332\_L1\_Tile\_rc|1  
AATTGATTAATTCTAATGGAGGGCATTACCTGACCAGCATCTGCATCACAAAGGTTTAG  
>HPV49\_Beta\_9627363\_nt6337\_L1\_Tile\_rc|1  
AACTGAATTGATTAATTCTAATGGAGGGCATTACCTGACCAGCATCTGCATCACAAAGG  
>HPV49\_Beta\_9627363\_nt6392\_L1\_Tile\_rc|1  
ATGTCTTATTATTGATATTACCAAAACCTATATCAATCATATCACCATCTTGTATAACTG  
>HPV49\_Beta\_9627363\_nt6587\_L1\_Tile\_rc|1  
GACCTACAGCAGTATTGGGTATCGCATCCCCTACATTACCACCTCTAACAAAGAAGTGCC  
>HPV49\_Beta\_9627363\_nt6592\_L1\_Tile\_rc|1  
ATCCTGACCTACAGCAGTATTGGGTATCGCATCCCCTACATTACCACCTCTAACAAAGAA  
>HPV49\_Beta\_9627363\_nt6602\_L1\_Tile\_rc|2  
TGTAATTGTTATCCTGACCTACAGCAGTATTGGGTATCGCATCCCCTACATTACCACCTC  
>HPV49\_Beta\_9627363\_nt6607\_L1\_Tile\_rc|1  
TAATATGTAATTGTTATCCTGACCTACAGCAGTATTGGGTATCGCATCCCCTACATTACC  
>HPV49\_Beta\_9627363\_nt6612\_L1\_Tile\_rc|1  
GCAGGTAATATGTAATTGTTATCCTGACCTACAGCAGTATTGGGTATCGCATCCCCTACA  
>HPV49\_Beta\_9627363\_nt6617\_L1\_Tile\_rc|1  
TTGCTGCAGGTAATATGTAATTGTTATCCTGACCTACAGCAGTATTGGGTATCGCATCCC  
>HPV49\_Beta\_9627363\_nt6622\_L1\_Tile\_rc|2  
TTGACTTGCTGCAGGTAATATGTAATTGTTATCCTGACCTACAGCAGTATTGGGTATCGC  
>HPV49\_Beta\_9627363\_nt6627\_L1\_Tile\_rc|1  
GCCTGTTGACTTGCTGCAGGTAATATGTAATTGTTATCCTGACCTACAGCAGTATTGGGT  
>HPV49\_Beta\_9627363\_nt6632\_L1\_Tile\_rc|1  
TTTGGGCCTGTTGACTTGCTGCAGGTAATATGTAATTGTTATCCTGACCTACAGCAGTAT  
>HPV49\_Beta\_9627363\_nt6647\_L1\_Tile\_rc|1  
AGCTGCCAAGAGTATTTTGGGCCTGTTGACTTGCTGCAGGTAATATGTAATTGTTATCCT  
>HPV49\_Beta\_9627363\_nt6652\_L1\_Tile\_rc|1

GATGGAGCTGCCAAGAGTATTTTGGGCCTGTTGACTTGCTGCAGGTAATATGTAATTGTT  
>HPV49\_Beta\_9627363\_nt6657\_L1\_Tile\_rc|1  
AAATAGATGGAGCTGCCAAGAGTATTTTGGGCCTGTTGACTTGCTGCAGGTAATATGTAA  
>HPV49\_Beta\_9627363\_nt6677\_L1\_Tile\_rc|1  
AAGAGCCACTGACGGTAGGGAAATAGATGGAGCTGCCAAGAGTATTTTGGGCCTGTTGAC  
>HPV49\_Beta\_9627363\_nt6822\_L1\_Tile\_rc|2  
CTTACACTAATAGTAAAATTGGTATTTCTGGTATTATCAGCCACTGTTATAAAAAGCTGA  
>HPV49\_Beta\_9627363\_nt6827\_L1\_Tile\_rc|1  
CCGTACTTACACTAATAGTAAAATTGGTATTTCTGGTATTATCAGCCACTGTTATAAAA  
>HPV49\_Beta\_9627363\_nt6832\_L1\_Tile\_rc|1  
GCCATCCGTACTTACACTAATAGTAAAATTGGTATTTCTGGTATTATCAGCCACTGTTAT  
>HPV49\_Beta\_9627363\_nt6847\_L1\_Tile\_rc|1  
TTCTGTAGGTGTCCTGGCCATCCGTACTTACACTAATAGTAAAATTGGTATTTCTGGTATT  
>HPV49\_Beta\_9627363\_nt6852\_L1\_Tile\_rc|1  
TCATATTCTGTAGGTGTCTGGCCATCCGTACTTACACTAATAGTAAAATTGGTATTTCTG  
>HPV49\_Beta\_9627363\_nt6857\_L1\_Tile\_rc|1  
TACTGTCATATTCTGTAGGTGTCTGGCCATCCGTACTTACACTAATAGTAAAATTGGTAT  
>HPV49\_Beta\_9627363\_nt6862\_L1\_Tile\_rc|2  
CTTGGTACTGTCATATTCTGTAGGTGTCTGGCCATCCGTACTTACACTAATAGTAAAATT  
>HPV49\_Beta\_9627363\_nt6867\_L1\_Tile\_rc|1  
CTAACCTTGGTACTGTCATATTCTGTAGGTGTCTGGCCATCCGTACTTACACTAATAGTA  
>HPV49\_Beta\_9627363\_nt7052\_L1\_Tile\_rc|1  
ATGTAAGATACCTATATGTGTCATGTATAGGATTATCAGGGGTAGGAACAAATCCCAATT  
>HPV49\_Beta\_9627363\_nt7057\_L1\_Tile\_rc|1  
CTGTGATGTAAGATACCTATATGTGTCATGTATAGGATTATCAGGGGTAGGAACAAATCC  
>HPV49\_Beta\_9627363\_nt7067\_L1\_Tile\_rc|1  
ATCGTGTTGCCTGTGATGTAAGATACCTATATGTGTCATGTATAGGATTATCAGGGGTAG  
>HPV49\_Beta\_9627363\_nt7072\_L1\_Tile\_rc|1  
AGGGCATCGTGTTGCCTGTGATGTAAGATACCTATATGTGTCATGTATAGGATTATCAGG  
>HPV49\_Beta\_9627363\_nt7077\_L1\_Tile\_rc|1  
TTGTCAGGGCATCGTGTTGCCTGTGATGTAAGATACCTATATGTGTCATGTATAGGATTA  
>HPV49\_Beta\_9627363\_nt7082\_L1\_Tile\_rc|2  
GTTGTTTGTGTCAGGGCATCGTGTTGCCTGTGATGTAAGATACCTATATGTGTCATGTATAG  
>HPV49\_Beta\_9627363\_nt7087\_L1\_Tile\_rc|1  
AGCAGGTTGTTTGTGTCAGGGCATCGTGTTGCCTGTGATGTAAGATACCTATATGTGTCATG  
>HPV49\_Beta\_9627363\_nt7097\_L1\_Tile\_rc|1  
TCCTTTCTGGAGCAGGTTGTTTGTGTCAGGGCATCGTGTTGCCTGTGATGTAAGATACCTAT  
>HPV49\_Beta\_9627363\_nt7112\_L1\_Tile\_rc|1  
GTCATATGGATCTTTCCTTTCTGGAGCAGGTTGTTTGTGTCAGGGCATCGTGTTGCCTGTG  
>HPV49\_Beta\_9627363\_nt7117\_L1\_Tile\_rc|1  
ATACTGCTCATATGGATCTTTCCTTTCTGGAGCAGGTTGTTTGTGTCAGGGCATCGTGTTGC  
>HPV49\_Beta\_9627363\_nt7122\_L1\_Tile\_rc|2  
AAGTTATACTGCTCATATGGATCTTTCCTTTCTGGAGCAGGTTGTTTGTGTCAGGGCATCGT  
>HPV49\_Beta\_9627363\_nt7232\_L1\_Tile\_rc|1  
ATTTAGACACTCTAGAAGCCCGTTGTAGCCAGCTTGAAATAAAAACTTCTTCCTAAAG  
>HPV49\_Beta\_9627363\_nt7242\_L1\_Tile\_rc|2  
GCAGCAGAGGATTTAGACACTCTAGAAGCCCGTTGTAGCCAGCTTGAAATAAAAACTTT  
>HPV49\_Beta\_9627363\_nt7247\_L1\_Tile\_rc|1  
CTCTAGCAGCAGAGGATTTAGACACTCTAGAAGCCCGTTGTAGCCAGCTTGAAATAAAA  
>HPV49\_Beta\_9627363\_nt7252\_L1\_Tile\_rc|1  
GGAAGCTCTAGCAGCAGAGGATTTAGACACTCTAGAAGCCCGTTGTAGCCAGCTTGAAA  
>HPV49\_Beta\_9627363\_nt7257\_L1\_Tile\_rc|1  
CGTGTGGAAGCTCTAGCAGCAGAGGATTTAGACACTCTAGAAGCCCGTTGTAGCCAGCT  
>HPV49\_Beta\_9627363\_nt7262\_L1\_Tile\_rc|2  
TACCCCGTGTGGAAGCTCTAGCAGCAGAGGATTTAGACACTCTAGAAGCCCGTTGTAGCC

>HPV49\_Beta\_9627363\_nt7267\_L1\_Tile\_rc|1  
TTTAATACCCCGTGTGGAAGCTCTAGCAGCAGAGGATTTAGACACTCTAGAAGCCCGTTG  
>HPV49\_Beta\_9627363\_nt7282\_L1\_Tile\_rc|2  
TCATCTCCGTTTTCTGTTTAATACCCCGTGTGGAAGCTCTAGCAGCAGAGGATTTAGACAC  
>HPV50\_Gamma\_9628550\_nt5232\_L1\_Tile\_rc|1  
GGCAACAGGAGTACTTGGTGGAAGGTATAACTTTCCAGAGGTTGAGGACCAATGAGCCAT  
>HPV50\_Gamma\_9628550\_nt5237\_L1\_Tile\_rc|1  
ACTCTGGCAACAGGAGTACTTGGTGGAAGGTATAACTTTCCAGAGGTTGAGGACCAATGA  
>HPV50\_Gamma\_9628550\_nt5242\_L1\_Tile\_rc|2  
TTAAAACTCTGGCAACAGGAGTACTTGGTGGAAGGTATAACTTTCCAGAGGTTGAGGACC  
>HPV50\_Gamma\_9628550\_nt5247\_L1\_Tile\_rc|1  
GGTGCTTAAAACTCTGGCAACAGGAGTACTTGGTGGAAGGTATAACTTTCCAGAGGTTGA  
>HPV50\_Gamma\_9628550\_nt5272\_L1\_Tile\_rc|1  
CATCAGTTTCTTTTCACATATTCATCGGTGCTTAAAACTCTGGCAACAGGAGTACTTGGTG  
>HPV50\_Gamma\_9628550\_nt5277\_L1\_Tile\_rc|1  
GTAAACATCAGTTTCTTTTCACATATTCATCGGTGCTTAAAACTCTGGCAACAGGAGTACT  
>HPV50\_Gamma\_9628550\_nt5322\_L1\_Tile\_rc|2  
ATATGGGTGTCCCACAATTAGTAAACGCTCACTGCGTGCATGAAAGTAAACATCAGTTTC  
>HPV50\_Gamma\_9628550\_nt5347\_L1\_Tile\_rc|1  
TATCTCCACCATCTTCTATATCATAATATGGGTGTCCCACAATTAGTAAACGCTCACTGC  
>HPV50\_Gamma\_9628550\_nt5352\_L1\_Tile\_rc|1  
TTTGATATCTCCACCATCTTCTATATCATAATATGGGTGTCCCACAATTAGTAAACGCTC  
>HPV50\_Gamma\_9628550\_nt5357\_L1\_Tile\_rc|1  
GGAACCTTTGATATCTCCACCATCTTCTATATCATAATATGGGTGTCCCACAATTAGTAAA  
>HPV50\_Gamma\_9628550\_nt5362\_L1\_Tile\_rc|2  
CTTTAGGAACTTTGATATCTCCACCATCTTCTATATCATAATATGGGTGTCCCACAATTA  
>HPV50\_Gamma\_9628550\_nt5372\_L1\_Tile\_rc|1  
TTTGCTGATACTTTAGGAACTTTGATATCTCCACCATCTTCTATATCATAATATGGGTGT  
>HPV50\_Gamma\_9628550\_nt5377\_L1\_Tile\_rc|1  
ATTGATTTGCTGATACTTTAGGAACTTTGATATCTCCACCATCTTCTATATCATAATATG  
>HPV50\_Gamma\_9628550\_nt5397\_L1\_Tile\_rc|1  
TTCACAACGAAAACTCTGTATTGATTGTGCTGATACTTTAGGAACTTTGATATCTCCACC  
>HPV50\_Gamma\_9628550\_nt5482\_L1\_Tile\_rc|2  
TACCTACTAGTTTCCAAACCAAACGTTCTGTATCTGAGTTATACAATGTAGTATCAATTA  
>HPV50\_Gamma\_9628550\_nt5487\_L1\_Tile\_rc|1  
TTCTATACCTACTAGTTTCCAAACCAAACGTTCTGTATCTGAGTTATACAATGTAGTATC  
>HPV50\_Gamma\_9628550\_nt5492\_L1\_Tile\_rc|1  
CCGACTTCTATACCTACTAGTTTCCAAACCAAACGTTCTGTATCTGAGTTATACAATGTA  
>HPV50\_Gamma\_9628550\_nt5497\_L1\_Tile\_rc|1  
CTCTCCCGACTTCTATACCTACTAGTTTCCAAACCAAACGTTCTGTATCTGAGTTATACA  
>HPV50\_Gamma\_9628550\_nt5507\_L1\_Tile\_rc|1  
AAAGGCCACCTCTCCCGACTTCTATACCTACTAGTTTCCAAACCAAACGTTCTGTATCT  
>HPV50\_Gamma\_9628550\_nt5522\_L1\_Tile\_rc|2  
GTAGATCCAACACCTAAAGGCCACCTCTCCCGACTTCTATACCTACTAGTTTCCAAACC  
>HPV50\_Gamma\_9628550\_nt5527\_L1\_Tile\_rc|1  
GACCAGTAGATCCAACACCTAAAGGCCACCTCTCCCGACTTCTATACCTACTAGTTTCC  
>HPV50\_Gamma\_9628550\_nt5617\_L1\_Tile\_rc|1  
CTATAGACAAGTTTTGTCTTTTCATCTTTTCTTGTGGACCTAAGTAAAAGCTAGGATTTT  
>HPV50\_Gamma\_9628550\_nt5622\_L1\_Tile\_rc|2  
AGGATCTATAGACAAGTTTTGTCTTTTCATCTTTTCTTGTGGACCTAAGTAAAAGCTAGG  
>HPV50\_Gamma\_9628550\_nt5632\_L1\_Tile\_rc|1  
GTGTTTGTTTAGGATCTATAGACAAGTTTTGTCTTTTCATCTTTTCTTGTGGACCTAAGT  
>HPV50\_Gamma\_9628550\_nt5642\_L1\_Tile\_rc|2  
ATCAATAACTGTGTTTGTTTAGGATCTATAGACAAGTTTTGTCTTTTCATCTTTTCTTGT  
>HPV50\_Gamma\_9628550\_nt5647\_L1\_Tile\_rc|1

CTACAATCAATAACTGTGTTTGTGTTAGGATCTATAGACAAGTTTTGTCTTTCATCTTTTT  
>HPV50\_Gamma\_9628550\_nt5652\_L1\_Tile\_rc|1  
GCAGCCTACAATCAATAACTGTGTTTGTGTTAGGATCTATAGACAAGTTTTGTCTTTCATC  
>HPV50\_Gamma\_9628550\_nt5667\_L1\_Tile\_rc|1  
ACCAACAGCTGGTTTGCAGCCTACAATCAATAACTGTGTTTGTGTTAGGATCTATAGACAA  
>HPV50\_Gamma\_9628550\_nt5687\_L1\_Tile\_rc|1  
TCTGCTAAATCCCAATATTCACCAACAGCTGGTTTGCAGCCTACAATCAATAACTGTGTT  
>HPV50\_Gamma\_9628550\_nt5692\_L1\_Tile\_rc|1  
AAGGTTCTGCTAAATCCCAATATTCACCAACAGCTGGTTTGCAGCCTACAATCAATAACT  
>HPV50\_Gamma\_9628550\_nt5702\_L1\_Tile\_rc|2  
TTTTTGTGTCACAAGGTTCTGCTAAATCCCAATATTCACCAACAGCTGGTTTGCAGCCTACA  
>HPV50\_Gamma\_9628550\_nt5717\_L1\_Tile\_rc|1  
CCATTATTTAAGCTGTTTTTGTGTCACAAGGTTCTGCTAAATCCCAATATTCACCAACAGCT  
>HPV50\_Gamma\_9628550\_nt5742\_L1\_Tile\_rc|2  
TACTAGTTGTATTGGAGGACACTTGCCATTATTTAAGCTGTTTTTGTGTCACAAGGTTCTGC  
>HPV50\_Gamma\_9628550\_nt5747\_L1\_Tile\_rc|1  
CTGTTTACTAGTTGTATTGGAGGACACTTGCCATTATTTAAGCTGTTTTTGTGTCACAAGGT  
>HPV50\_Gamma\_9628550\_nt5752\_L1\_Tile\_rc|1  
TATAACTGTTTACTAGTTGTATTGGAGGACACTTGCCATTATTTAAGCTGTTTTTGTGTCAC  
>HPV50\_Gamma\_9628550\_nt5757\_L1\_Tile\_rc|1  
CTGAATATAACTGTTTACTAGTTGTATTGGAGGACACTTGCCATTATTTAAGCTGTTTTT  
>HPV50\_Gamma\_9628550\_nt5827\_L1\_Tile\_rc|1  
CCCCTGCTCTGCTCTGTTGTAGTTTAGGAAAGTTTGCATTACCAAATCCTATATCTCCCA  
>HPV50\_Gamma\_9628550\_nt5832\_L1\_Tile\_rc|1  
AGGGACCCCTGCTCTGCTCTGTTGTAGTTTAGGAAAGTTTGCATTACCAAATCCTATATC  
>HPV50\_Gamma\_9628550\_nt5837\_L1\_Tile\_rc|1  
TCTAAAGGGACCCCTGCTCTGCTCTGTTGTAGTTTAGGAAAGTTTGCATTACCAAATCCT  
>HPV50\_Gamma\_9628550\_nt5847\_L1\_Tile\_rc|1  
ATCCACTATATCTAAAGGGACCCCTGCTCTGCTCTGTTGTAGTTTAGGAAAGTTTGCATT  
>HPV50\_Gamma\_9628550\_nt5852\_L1\_Tile\_rc|1  
ATTGAATCCACTATATCTAAAGGGACCCCTGCTCTGCTCTGTTGTAGTTTAGGAAAGTTT  
>HPV50\_Gamma\_9628550\_nt5862\_L1\_Tile\_rc|2  
CCATAAGCTGATTGAATCCACTATATCTAAAGGGACCCCTGCTCTGCTCTGTTGTAGTTT  
>HPV50\_Gamma\_9628550\_nt5872\_L1\_Tile\_rc|1  
ATAGATCAGGCCATAAGCTGATTGAATCCACTATATCTAAAGGGACCCCTGCTCTGCTCT  
>HPV50\_Gamma\_9628550\_nt5882\_L1\_Tile\_rc|2  
GTCATTTTTTAATAGATCAGGCCATAAGCTGATTGAATCCACTATATCTAAAGGGACCCCT  
>HPV50\_Gamma\_9628550\_nt5887\_L1\_Tile\_rc|1  
CTTTAGTCATTTTTTAATAGATCAGGCCATAAGCTGATTGAATCCACTATATCTAAAGGGA  
>HPV50\_Gamma\_9628550\_nt5892\_L1\_Tile\_rc|1  
GACATCTTTAGTCATTTTTTAATAGATCAGGCCATAAGCTGATTGAATCCACTATATCTAA  
>HPV50\_Gamma\_9628550\_nt5897\_L1\_Tile\_rc|1  
CCATAGACATCTTTAGTCATTTTTTAATAGATCAGGCCATAAGCTGATTGAATCCACTATA  
>HPV50\_Gamma\_9628550\_nt5902\_L1\_Tile\_rc|2  
GGTCCCACATAGACATCTTTAGTCATTTTTTAATAGATCAGGCCATAAGCTGATTGAATCCA  
>HPV50\_Gamma\_9628550\_nt5917\_L1\_Tile\_rc|1  
CATAGAAAAACACATGGTCCCACATAGACATCTTTAGTCATTTTTTAATAGATCAGGCCATA  
>HPV50\_Gamma\_9628550\_nt5927\_L1\_Tile\_rc|1  
TCTTGCTTTGCATAGAAAAACACATGGTCCCACATAGACATCTTTAGTCATTTTTTAATAGA  
>HPV50\_Gamma\_9628550\_nt5937\_L1\_Tile\_rc|1  
ATATAATTGCTCTTGCTTTGCATAGAAAAACACATGGTCCCACATAGACATCTTTAGTCAT  
>HPV50\_Gamma\_9628550\_nt5977\_L1\_Tile\_rc|1  
GTTCCCCAATTGGTCCTGCATGGGTAAACAAATGTCTGGCATATAATTGCTCTTGCTTTG  
>HPV50\_Gamma\_9628550\_nt5982\_L1\_Tile\_rc|2  
TATAGGTTCCCCAATTGGTCCTGCATGGGTAAACAAATGTCTGGCATATAATTGCTCTTG



>HPV50\_Gamma\_9628550\_nt5987\_L1\_Tile\_rc|1  
TTAGGTATAGGTTCCCCAATTGGTCCTGCATGGGTAAACAAATGTCTGGCATATAATTGC  
>HPV50\_Gamma\_9628550\_nt5992\_L1\_Tile\_rc|1  
AGACATTAGGTATAGGTTCCCCAATTGGTCCTGCATGGGTAAACAAATGTCTGGCATATA  
>HPV50\_Gamma\_9628550\_nt5997\_L1\_Tile\_rc|1  
TCCTGAGACATTAGGTATAGGTTCCCCAATTGGTCCTGCATGGGTAAACAAATGTCTGGC  
>HPV50\_Gamma\_9628550\_nt6002\_L1\_Tile\_rc|2  
TAAACTCCTGAGACATTAGGTATAGGTTCCCCAATTGGTCCTGCATGGGTAAACAAATGT  
>HPV50\_Gamma\_9628550\_nt6007\_L1\_Tile\_rc|1  
AATTATAAACTCCTGAGACATTAGGTATAGGTTCCCCAATTGGTCCTGCATGGGTAAACA  
>HPV50\_Gamma\_9628550\_nt6022\_L1\_Tile\_rc|2  
TAGGGTTTACTGCATAATTATAAACTCCTGAGACATTAGGTATAGGTTCCCCAATTGGTC  
>HPV50\_Gamma\_9628550\_nt6027\_L1\_Tile\_rc|1  
TTGATTAGGGTTTACTGCATAATTATAAACTCCTGAGACATTAGGTATAGGTTCCCCAAT  
>HPV50\_Gamma\_9628550\_nt6032\_L1\_Tile\_rc|1  
TCTGGTTGATTAGGGTTTACTGCATAATTATAAACTCCTGAGACATTAGGTATAGGTTCC  
>HPV50\_Gamma\_9628550\_nt6037\_L1\_Tile\_rc|1  
TTTGCTCTGGTTGATTAGGGTTTACTGCATAATTATAAACTCCTGAGACATTAGGTATAG  
>HPV50\_Gamma\_9628550\_nt6042\_L1\_Tile\_rc|2  
ACGATTTTGCTCTGGTTGATTAGGGTTTACTGCATAATTATAAACTCCTGAGACATTAGG  
>HPV50\_Gamma\_9628550\_nt6047\_L1\_Tile\_rc|1  
GTTCTACGATTTTGCTCTGGTTGATTAGGGTTTACTGCATAATTATAAACTCCTGAGACA  
>HPV50\_Gamma\_9628550\_nt6057\_L1\_Tile\_rc|1  
ACCAATATTGGTTCTACGATTTTGCTCTGGTTGATTAGGGTTTACTGCATAATTATAAAC  
>HPV50\_Gamma\_9628550\_nt6062\_L1\_Tile\_rc|2  
TAGGAACCAATATTGGTTCTACGATTTTGCTCTGGTTGATTAGGGTTTACTGCATAATTA  
>HPV50\_Gamma\_9628550\_nt6067\_L1\_Tile\_rc|1  
ATAAGTAGGAACCAATATTGGTTCTACGATTTTGCTCTGGTTGATTAGGGTTTACTGCAT  
>HPV50\_Gamma\_9628550\_nt6072\_L1\_Tile\_rc|1  
AAAATATAAGTAGGAACCAATATTGGTTCTACGATTTTGCTCTGGTTGATTAGGGTTTAC  
>HPV50\_Gamma\_9628550\_nt6077\_L1\_Tile\_rc|1  
GTAGTAAATATAAGTAGGAACCAATATTGGTTCTACGATTTTGCTCTGGTTGATTAGGG  
>HPV50\_Gamma\_9628550\_nt6082\_L1\_Tile\_rc|2  
TTGGTGTAGTAAATATAAGTAGGAACCAATATTGGTTCTACGATTTTGCTCTGGTTGAT  
>HPV50\_Gamma\_9628550\_nt6092\_L1\_Tile\_rc|1  
AAAGATCCACTTGGTGTAGTAAATATAAGTAGGAACCAATATTGGTTCTACGATTTTGC  
>HPV50\_Gamma\_9628550\_nt6097\_L1\_Tile\_rc|1  
TATTTAAAGATCCACTTGGTGTAGTAAATATAAGTAGGAACCAATATTGGTTCTACGAT  
>HPV50\_Gamma\_9628550\_nt6102\_L1\_Tile\_rc|2  
GCTTGTATTTAAAGATCCACTTGGTGTAGTAAATATAAGTAGGAACCAATATTGGTTCT  
>HPV50\_Gamma\_9628550\_nt6107\_L1\_Tile\_rc|1  
GAACTGCTTGTATTTAAAGATCCACTTGGTGTAGTAAATATAAGTAGGAACCAATATTG  
>HPV50\_Gamma\_9628550\_nt6112\_L1\_Tile\_rc|1  
ACTGTGAAGTCTTGTATTTAAAGATCCACTTGGTGTAGTAAATATAAGTAGGAACCAA  
>HPV50\_Gamma\_9628550\_nt6117\_L1\_Tile\_rc|1  
AAATAACTGTGAAGTCTTGTATTTAAAGATCCACTTGGTGTAGTAAATATAAGTAGGA  
>HPV50\_Gamma\_9628550\_nt6137\_L1\_Tile\_rc|1  
CGAATCCAATATGGTCTATTAAATAACTGTGAAGTCTTGTATTTAAAGATCCACTTGGT  
>HPV50\_Gamma\_9628550\_nt6207\_L1\_Tile\_rc|1  
GGTGTATCAAATACTGTAACAAATACCTCATTACCCCAACAAATACAATTGTTTCGTACC  
>HPV50\_Gamma\_9628550\_nt6217\_L1\_Tile\_rc|1  
TAATGTTTCTGGTGTATCAAATACTGTAACAAATACCTCATTACCCCAACAAATACAAT  
>HPV50\_Gamma\_9628550\_nt6222\_L1\_Tile\_rc|2  
AAAGTTAATGTTTCTGGTGTATCAAATACTGTAACAAATACCTCATTACCCCAACAAAT  
>HPV50\_Gamma\_9628550\_nt6227\_L1\_Tile\_rc|1

ATATTAAAGTTAATGTTTCTGGTGTTATCAAATACTGTAACAAATACCTCATTACCCCCAA  
>HPV50\_Gamma\_9628550\_nt6232\_L1\_Tile\_rc|1  
CACTAATATTAAAGTTAATGTTTCTGGTGTTATCAAATACTGTAACAAATACCTCATTAC  
>HPV50\_Gamma\_9628550\_nt6237\_L1\_Tile\_rc|1  
CTTAACACTAATATTAAAGTTAATGTTTCTGGTGTTATCAAATACTGTAACAAATACCTC  
>HPV50\_Gamma\_9628550\_nt6242\_L1\_Tile\_rc|2  
TCTTTCTTAACACTAATATTAAAGTTAATGTTTCTGGTGTTATCAAATACTGTAACAAAT  
>HPV50\_Gamma\_9628550\_nt6247\_L1\_Tile\_rc|1  
TGACATCTTTCTTAACACTAATATTAAAGTTAATGTTTCTGGTGTTATCAAATACTGTAA  
>HPV50\_Gamma\_9628550\_nt6252\_L1\_Tile\_rc|1  
AGGATTGACATCTTTCTTAACACTAATATTAAAGTTAATGTTTCTGGTGTTATCAAATAC  
>HPV50\_Gamma\_9628550\_nt6257\_L1\_Tile\_rc|1  
TCCAAAGGATTGACATCTTTCTTAACACTAATATTAAAGTTAATGTTTCTGGTGTTATCA  
>HPV50\_Gamma\_9628550\_nt6262\_L1\_Tile\_rc|2  
AAGGATCCAAAGGATTGACATCTTTCTTAACACTAATATTAAAGTTAATGTTTCTGGTGT  
>HPV50\_Gamma\_9628550\_nt6267\_L1\_Tile\_rc|1  
ATTTAAAGGATCCAAAGGATTGACATCTTTCTTAACACTAATATTAAAGTTAATGTTTCT  
>HPV50\_Gamma\_9628550\_nt6272\_L1\_Tile\_rc|1  
GCTACATTTAAAGGATCCAAAGGATTGACATCTTTCTTAACACTAATATTAAAGTTAATG  
>HPV50\_Gamma\_9628550\_nt6277\_L1\_Tile\_rc|1  
AACTTGCTACATTTAAAGGATCCAAAGGATTGACATCTTTCTTAACACTAATATTAAAGT  
>HPV50\_Gamma\_9628550\_nt6287\_L1\_Tile\_rc|1  
TACATATAAGAACTTGCTACATTTAAAGGATCCAAAGGATTGACATCTTTCTTAACACTA  
>HPV50\_Gamma\_9628550\_nt6292\_L1\_Tile\_rc|1  
TTGAGTACATATAAGAACTTGCTACATTTAAAGGATCCAAAGGATTGACATCTTTCTTAA  
>HPV50\_Gamma\_9628550\_nt6297\_L1\_Tile\_rc|1  
ATCCTTTGAGTACATATAAGAACTTGCTACATTTAAAGGATCCAAAGGATTGACATCTTT  
>HPV50\_Gamma\_9628550\_nt6302\_L1\_Tile\_rc|2  
AAATCATCCTTTGAGTACATATAAGAACTTGCTACATTTAAAGGATCCAAAGGATTGACA  
>HPV50\_Gamma\_9628550\_nt6307\_L1\_Tile\_rc|1  
GATTAAAATCATCCTTTGAGTACATATAAGAACTTGCTACATTTAAAGGATCCAAAGGAT  
>HPV50\_Gamma\_9628550\_nt6322\_L1\_Tile\_rc|2  
TATGACGGCTGTACTGATTAAAATCATCCTTTGAGTACATATAAGAACTTGCTACATTTA  
>HPV50\_Gamma\_9628550\_nt6327\_L1\_Tile\_rc|1  
TTCAGTATGACGGCTGTACTGATTAAAATCATCCTTTGAGTACATATAAGAACTTGCTAC  
>HPV50\_Gamma\_9628550\_nt6332\_L1\_Tile\_rc|1  
TATTCTTCAGTATGACGGCTGTACTGATTAAAATCATCCTTTGAGTACATATAAGAACTT  
>HPV50\_Gamma\_9628550\_nt6337\_L1\_Tile\_rc|1  
ATTCATATTCTTCAGTATGACGGCTGTACTGATTAAAATCATCCTTTGAGTACATATAAG  
>HPV50\_Gamma\_9628550\_nt6342\_L1\_Tile\_rc|2  
TTCTAATTCATATTCTTCAGTATGACGGCTGTACTGATTAAAATCATCCTTTGAGTACAT  
>HPV50\_Gamma\_9628550\_nt6347\_L1\_Tile\_rc|1  
ATAAATTCTAATTCATATTCTTCAGTATGACGGCTGTACTGATTAAAATCATCCTTTGAG  
>HPV50\_Gamma\_9628550\_nt6387\_L1\_Tile\_rc|1  
TAATATATCAGCATCCAATCCTACTTTACATAACTGAAATATAAATTCTAATTCATATTC  
>HPV50\_Gamma\_9628550\_nt6392\_L1\_Tile\_rc|1  
TGAGCTAATATATCAGCATCCAATCCTACTTTACATAACTGAAATATAAATTCTAATTC  
>HPV50\_Gamma\_9628550\_nt6397\_L1\_Tile\_rc|1  
TAAGATGAGCTAATATATCAGCATCCAATCCTACTTTACATAACTGAAATATAAATTCTA  
>HPV50\_Gamma\_9628550\_nt6402\_L1\_Tile\_rc|2  
TACATTAAGATGAGCTAATATATCAGCATCCAATCCTACTTTACATAACTGAAATATAAA  
>HPV50\_Gamma\_9628550\_nt6407\_L1\_Tile\_rc|1  
TCCATTACATTAAGATGAGCTAATATATCAGCATCCAATCCTACTTTACATAACTGAAAT  
>HPV50\_Gamma\_9628550\_nt6417\_L1\_Tile\_rc|1  
AATTCTGGGGTCCATTACATTAAGATGAGCTAATATATCAGCATCCAATCCTACTTTACA

>HPV50\_Gamma\_9628550\_nt6422\_L1\_Tile\_rc|2  
TCCAAAATTCTGGGGTCCATTACATTAAGATGAGCTAATATATCAGCATCCAATCCTACT  
>HPV50\_Gamma\_9628550\_nt6427\_L1\_Tile\_rc|1  
AATTTTCCAAAATTCTGGGGTCCATTACATTAAGATGAGCTAATATATCAGCATCCAATC  
>HPV50\_Gamma\_9628550\_nt6432\_L1\_Tile\_rc|1  
TTGCCAATTTTCCAAAATTCTGGGGTCCATTACATTAAGATGAGCTAATATATCAGCATC  
>HPV50\_Gamma\_9628550\_nt6437\_L1\_Tile\_rc|1  
GCTAATTGCCAATTTTCCAAAATTCTGGGGTCCATTACATTAAGATGAGCTAATATATCA  
>HPV50\_Gamma\_9628550\_nt6442\_L1\_Tile\_rc|2  
CATAAGCTAATTGCCAATTTTCCAAAATTCTGGGGTCCATTACATTAAGATGAGCTAATA  
>HPV50\_Gamma\_9628550\_nt6447\_L1\_Tile\_rc|1  
TGGAACATAAGCTAATTGCCAATTTTCCAAAATTCTGGGGTCCATTACATTAAGATGAGC  
>HPV50\_Gamma\_9628550\_nt6472\_L1\_Tile\_rc|1  
TATCGCCTATACCACTGGGAGCTGGTGGAACATAAGCTAATTGCCAATTTTCCAAAATTC  
>HPV50\_Gamma\_9628550\_nt6522\_L1\_Tile\_rc|2  
ACTGTCTTTTGCAGGACATTTTGTAGCATCAGATTTTAAGTATCTGTAAGTATCGCCTAT  
>HPV50\_Gamma\_9628550\_nt6527\_L1\_Tile\_rc|1  
GCGCTACTGTCTTTTGCAGGACATTTTGTAGCATCAGATTTTAAGTATCTGTAAGTATCG  
>HPV50\_Gamma\_9628550\_nt6532\_L1\_Tile\_rc|1  
CTTCGGCGCTACTGTCTTTTGCAGGACATTTTGTAGCATCAGATTTTAAGTATCTGTAAG  
>HPV50\_Gamma\_9628550\_nt6537\_L1\_Tile\_rc|1  
TACTACTTCGGCGCTACTGTCTTTTGCAGGACATTTTGTAGCATCAGATTTTAAGTATCT  
>HPV50\_Gamma\_9628550\_nt6542\_L1\_Tile\_rc|2  
GGGTCTACTACTTCGGCGCTACTGTCTTTTGCAGGACATTTTGTAGCATCAGATTTTAAG  
>HPV50\_Gamma\_9628550\_nt6547\_L1\_Tile\_rc|1  
TATAAGGGTCTACTACTTCGGCGCTACTGTCTTTTGCAGGACATTTTGTAGCATCAGATT  
>HPV50\_Gamma\_9628550\_nt6552\_L1\_Tile\_rc|1  
TTCTTTTATAAGGGTCTACTACTTCGGCGCTACTGTCTTTTGCAGGACATTTTGTAGCATC  
>HPV50\_Gamma\_9628550\_nt6572\_L1\_Tile\_rc|1  
TTGACATTCCAAAAGTATATTCTTTTATAAGGGTCTACTACTTCGGCGCTACTGTCTTTT  
>HPV50\_Gamma\_9628550\_nt6587\_L1\_Tile\_rc|1  
AACTTTTCTGTAAGGTTGACATTCCAAAAGTATATTCTTTTATAAGGGTCTACTACTTCG  
>HPV50\_Gamma\_9628550\_nt6592\_L1\_Tile\_rc|1  
ACGAAAACCTTTTCTGTAAGGTTGACATTCCAAAAGTATATTCTTTTATAAGGGTCTACTA  
>HPV50\_Gamma\_9628550\_nt6597\_L1\_Tile\_rc|1  
TTCAGACGAAAACCTTTTCTGTAAGGTTGACATTCCAAAAGTATATTCTTTTATAAGGGTC  
>HPV50\_Gamma\_9628550\_nt6602\_L1\_Tile\_rc|2  
TCAAGTTCAGACGAAAACCTTTTCTGTAAGGTTGACATTCCAAAAGTATATTCTTTTATAA  
>HPV50\_Gamma\_9628550\_nt6607\_L1\_Tile\_rc|1  
ACTGATCAAGTTCAGACGAAAACCTTTTCTGTAAGGTTGACATTCCAAAAGTATATTCTT  
>HPV50\_Gamma\_9628550\_nt6612\_L1\_Tile\_rc|1  
GGCATACTGATCAAGTTCAGACGAAAACCTTTTCTGTAAGGTTGACATTCCAAAAGTATA  
>HPV50\_Gamma\_9628550\_nt6617\_L1\_Tile\_rc|1  
CCTAGGGCATACTGATCAAGTTCAGACGAAAACCTTTTCTGTAAGGTTGACATTCCAAAAA  
>HPV50\_Gamma\_9628550\_nt6627\_L1\_Tile\_rc|1  
AAATTTTCGTCCCTAGGGCATACTGATCAAGTTCAGACGAAAACCTTTTCTGTAAGGTTGAC  
>HPV50\_Gamma\_9628550\_nt6642\_L1\_Tile\_rc|2  
TCCAGTCTGAAACAAAATTTTCGTCCCTAGGGCATACTGATCAAGTTCAGACGAAAACCT  
>HPV50\_Gamma\_9628550\_nt6647\_L1\_Tile\_rc|1  
AATAATCCAGTCTGAAACAAAATTTTCGTCCCTAGGGCATACTGATCAAGTTCAGACGAA  
>HPV50\_Gamma\_9628550\_nt6652\_L1\_Tile\_rc|1  
TCTTTAATAATCCAGTCTGAAACAAAATTTTCGTCCCTAGGGCATACTGATCAAGTTCAG  
>HPV50\_Gamma\_9628550\_nt6657\_L1\_Tile\_rc|1  
TCTTCTCTTTAATAATCCAGTCTGAAACAAAATTTTCGTCCCTAGGGCATACTGATCAAG  
>HPV50\_Gamma\_9628550\_nt6662\_L1\_Tile\_rc|2

CTAACTCTTCTCTTTAATAATCCAGTCTGAAACAAAAATTTTCGTCCTAGGGCATACTGA  
>HPV50\_Gamma\_9628550\_nt6667\_L1\_Tile\_rc|1  
CAGTTCTAACTCTTCTCTTTAATAATCCAGTCTGAAACAAAAATTTTCGTCCTAGGGCAT  
>HPV50\_Gamma\_9628550\_nt6672\_L1\_Tile\_rc|1  
GTAATCAGTTCTAACTCTTCTCTTTAATAATCCAGTCTGAAACAAAAATTTTCGTCCTAG  
>HPV50\_Gamma\_9628550\_nt6677\_L1\_Tile\_rc|1  
ACAGTGTAATCAGTTCTAACTCTTCTCTTTAATAATCCAGTCTGAAACAAAAATTTTCGT  
>HPV50\_Gamma\_9628550\_nt6682\_L1\_Tile\_rc|2  
TAGCAACAGTGTAATCAGTTCTAACTCTTCTCTTTAATAATCCAGTCTGAAACAAAAAT  
>HPV50\_Gamma\_9628550\_nt6687\_L1\_Tile\_rc|1  
AACTGTAGCAACAGTGTAATCAGTTCTAACTCTTCTCTTTAATAATCCAGTCTGAAACAA  
>HPV50\_Gamma\_9628550\_nt6692\_L1\_Tile\_rc|1  
TTGGAAACTGTAGCAACAGTGTAATCAGTTCTAACTCTTCTCTTTAATAATCCAGTCTGA  
>HPV50\_Gamma\_9628550\_nt6697\_L1\_Tile\_rc|1  
TTGGTTTGGAACTGTAGCAACAGTGTAATCAGTTCTAACTCTTCTCTTTAATAATCCAG  
>HPV50\_Gamma\_9628550\_nt6702\_L1\_Tile\_rc|2  
CTTGTTTGGTTTGGAACTGTAGCAACAGTGTAATCAGTTCTAACTCTTCTCTTTAATAA  
>HPV50\_Gamma\_9628550\_nt6707\_L1\_Tile\_rc|1  
TTTCTCTTGTTTGGTTTGGAACTGTAGCAACAGTGTAATCAGTTCTAACTCTTCTCTTT  
>HPV50\_Gamma\_9628550\_nt6712\_L1\_Tile\_rc|1  
TACGTTTTCTCTTGTTTGGTTTGGAACTGTAGCAACAGTGTAATCAGTTCTAACTCTTC  
>HPV50\_Gamma\_9628550\_nt6720\_L1\_Tile\_rc|1  
TTATCTGGTACGTTTTCTCTTGTTTGGTTTGGAACTGTAGCAACAGTGTAATCAGTTCT  
>HPV51\_Alpha\_333087\_nt5667\_L1\_Tile\_rc|1  
ATTGAAATGCAGATACTTTAGGAATAGCAGCACGCGTTGAGGTTTTAGGTATTGGAAAAT  
>HPV51\_Alpha\_333087\_nt5892\_L1\_Tile\_rc|1  
CTCTAACATCTTGTTGTGCATTGCCATTTGCTATGCGTGAATTTTCTGTGTCATCATATT  
>HPV51\_Alpha\_333087\_nt5897\_L1\_Tile\_rc|1  
GTTATCTCTAACATCTTGTTGTGCATTGCCATTTGCTATGCGTGAATTTTCTGTGTCATC  
>HPV51\_Alpha\_333087\_nt5902\_L1\_Tile\_rc|2  
GATGTGTTATCTCTAACATCTTGTTGTGCATTGCCATTTGCTATGCGTGAATTTTCTGTG  
>HPV51\_Alpha\_333087\_nt5907\_L1\_Tile\_rc|1  
CAACAGATGTGTTATCTCTAACATCTTGTTGTGCATTGCCATTTGCTATGCGTGAATTTT  
>HPV51\_Alpha\_333087\_nt5912\_L1\_Tile\_rc|1  
GTTGTCAACAGATGTGTTATCTCTAACATCTTGTTGTGCATTGCCATTTGCTATGCGTGA  
>HPV51\_Alpha\_333087\_nt6027\_L1\_Tile\_rc|1  
GTTCCAGGGGGGGCAGTCTCCTGGAGGTACAGGTGTGTTTTTGCATGTAGTGCCAATAC  
>HPV51\_Alpha\_333087\_nt6032\_L1\_Tile\_rc|1  
TACAAGTTCCAGGGGGGGCAGTCTCCTGGAGGTACAGGTGTGTTTTTGCATGTAGTGCC  
>HPV51\_Alpha\_333087\_nt6272\_L1\_Tile\_rc|1  
AATGTCTTCCCCAACACCTACAAGTTTATTATAATAGTGCCTAGCAAAGATTTGCTCCCT  
>HPV51\_Alpha\_333087\_nt6282\_L1\_Tile\_rc|2  
AATCGTTAGGAATGTCTTCCCCAACACCTACAAGTTTATTATAATAGTGCCTAGCAAAGA  
>HPV51\_Alpha\_333087\_nt6287\_L1\_Tile\_rc|1  
ATAATAATCGTTAGGAATGTCTTCCCCAACACCTACAAGTTTATTATAATAGTGCCTAGC  
>HPV51\_Alpha\_333087\_nt6292\_L1\_Tile\_rc|1  
TTAATATAATAATCGTTAGGAATGTCTTCCCCAACACCTACAAGTTTATTATAATAGTGC  
>HPV51\_Alpha\_333087\_nt6297\_L1\_Tile\_rc|1  
TACCCCTAATATAATAATCGTTAGGAATGTCTTCCCCAACACCTACAAGTTTATTATAAT  
>HPV51\_Alpha\_333087\_nt6302\_L1\_Tile\_rc|2  
ACCACTACCCCTAATATAATAATCGTTAGGAATGTCTTCCCCAACACCTACAAGTTTATT  
>HPV51\_Alpha\_333087\_nt6307\_L1\_Tile\_rc|1  
CCATTACCACTACCCCTAATATAATAATCGTTAGGAATGTCTTCCCCAACACCTACAAGT  
>HPV51\_Alpha\_333087\_nt6312\_L1\_Tile\_rc|1  
CACGGCCATTACCACTACCCCTAATATAATAATCGTTAGGAATGTCTTCCCCAACACCTA

>HPV51\_Alpha\_333087\_nt6517\_L1\_Tile\_rc|1  
GAAACCGCAGCAGTGGCAGTGCTAATAGTTAAATTTGTACTTCTGGTAGTATCAACACAG  
>HPV51\_Alpha\_333087\_nt6522\_L1\_Tile\_rc|2  
TTGGGGAAACCGCAGCAGTGGCAGTGCTAATAGTTAAATTTGTACTTCTGGTAGTATCAA  
>HPV51\_Alpha\_333087\_nt6527\_L1\_Tile\_rc|1  
AAATGTTGGGGAAACCGCAGCAGTGGCAGTGCTAATAGTTAAATTTGTACTTCTGGTAGT  
>HPV51\_Alpha\_333087\_nt6532\_L1\_Tile\_rc|1  
GGAGTAAATGTTGGGGAAACCGCAGCAGTGGCAGTGCTAATAGTTAAATTTGTACTTCTG  
>HPV51\_Alpha\_333087\_nt6537\_L1\_Tile\_rc|1  
TACTTGGAGTAAATGTTGGGGAAACCGCAGCAGTGGCAGTGCTAATAGTTAAATTTGTAC  
>HPV51\_Alpha\_333087\_nt6542\_L1\_Tile\_rc|2  
AAAGTTACTTGGAGTAAATGTTGGGGAAACCGCAGCAGTGGCAGTGCTAATAGTTAAATT  
>HPV51\_Alpha\_333087\_nt6547\_L1\_Tile\_rc|1  
TGCTTAAAGTTACTTGGAGTAAATGTTGGGGAAACCGCAGCAGTGGCAGTGCTAATAGTT  
>HPV51\_Alpha\_333087\_nt6552\_L1\_Tile\_rc|1  
TATATTGCTTAAAGTTACTTGGAGTAAATGTTGGGGAAACCGCAGCAGTGGCAGTGCTAA  
>HPV51\_Alpha\_333087\_nt6557\_L1\_Tile\_rc|1  
CCTAATATATTGCTTAAAGTTACTTGGAGTAAATGTTGGGGAAACCGCAGCAGTGGCAGT  
>HPV51\_Alpha\_333087\_nt6652\_L1\_Tile\_rc|1  
GTAGGATCCATTGTGTGTAAATAAGCCATTACCTCTGTAGTTAAAGTAATTTTACATAAT  
>HPV51\_Alpha\_333087\_nt6667\_L1\_Tile\_rc|1  
CACTGTTCAAGAATGGTAGGATCCATTGTGTGTAAATAAGCCATTACCTCTGTAGTTAAA  
>HPV52\_Alpha\_397038\_nt5756\_L1\_Tile\_rc|1  
CACTACTGGTGTTTTTAATAGAAAAATAGGGATGTCCTACTGTTAGTAATCGAGAACTGC  
>HPV52\_Alpha\_397038\_nt5761\_L1\_Tile\_rc|1  
ATTACCACTACTGGTGTTTTTAATAGAAAAATAGGGATGTCCTACTGTTAGTAATCGAGA  
>HPV52\_Alpha\_397038\_nt5771\_L1\_Tile\_rc|1  
CTTTTTTACCATTACCCTACTGGTGTTTTTAATAGAAAAATAGGGATGTCCTACTGTTA  
>HPV52\_Alpha\_397038\_nt5776\_L1\_Tile\_rc|1  
TAAAACTTTTTTACCATTACCCTACTGGTGTTTTTAATAGAAAAATAGGGATGTCCTAC  
>HPV52\_Alpha\_397038\_nt5781\_L1\_Tile\_rc|1  
GGAACATAAACTTTTTTACCATTACCCTACTGGTGTTTTTAATAGAAAAATAGGGATGT  
>HPV52\_Alpha\_397038\_nt5791\_L1\_Tile\_rc|1  
AGACACCTTGGGAATAAACTTTTTTACCATTACCCTACTGGTGTTTTTAATAGAAAA  
>HPV52\_Alpha\_397038\_nt6021\_L1\_Tile\_rc|1  
TTATCTATACCAGGTTTACCAGCATATTTGTTACTGGTTTCAGTATCATCAAACCTTGTTT  
>HPV52\_Alpha\_397038\_nt6131\_L1\_Tile\_rc|1  
CTGAATTATTATTACAAGGGGTTCCCTTACCCCAATGTTACCTATAGGAGGTTTGCATC  
>HPV52\_Alpha\_397038\_nt6156\_L1\_Tile\_rc|1  
AGGGGAGGACAATCCCCAGGATTTCTGAATTATTATTACAAGGGGTTCCCTTACCCCAA  
>HPV52\_Alpha\_397038\_nt6161\_L1\_Tile\_rc|1  
GCTGTAGGGGAGGACAATCCCCAGGATTTCTGAATTATTATTACAAGGGGTTCCCTTAC  
>HPV52\_Alpha\_397038\_nt6166\_L1\_Tile\_rc|1  
AATGAGCTGTAGGGGAGGACAATCCCCAGGATTTCTGAATTATTATTACAAGGGGTTCC  
>HPV52\_Alpha\_397038\_nt6171\_L1\_Tile\_rc|1  
CTGTTAATGAGCTGTAGGGGAGGACAATCCCCAGGATTTCTGAATTATTATTACAAGGG  
>HPV52\_Alpha\_397038\_nt6176\_L1\_Tile\_rc|1  
TTACACTGTTAATGAGCTGTAGGGGAGGACAATCCCCAGGATTTCTGAATTATTATTAC  
>HPV52\_Alpha\_397038\_nt6436\_L1\_Tile\_rc|1  
GTTAGACCCTTGATATATATAAATCACCTGGCACAGGGTCACCTAAGGTACCGGCCCTATT  
>HPV52\_Alpha\_397038\_nt6446\_L1\_Tile\_rc|1  
TATTGCCAGAGTTAGACCCTTGATATATATAAATCACCTGGCACAGGGTCACCTAAGGTAC  
>HPV52\_Alpha\_397038\_nt6451\_L1\_Tile\_rc|1  
GGCAGTATTGCCAGAGTTAGACCCTTGATATATATAAATCACCTGGCACAGGGTCACCTAA  
>HPV52\_Alpha\_397038\_nt6461\_L1\_Tile\_rc|1

TTTGTACAGTGGCAGTATTGCCAGAGTTAGACCCTTGTATATATAAAATCACCTGGCACAG  
>HPV52\_Alpha\_397038\_nt6466\_L1\_Tile\_rc|1  
ACTGCTTTGTACAGTGGCAGTATTGCCAGAGTTAGACCCTTGTATATATAAAATCACCTGG  
>HPV52\_Alpha\_397038\_nt6471\_L1\_Tile\_rc|1  
AAAGCACTGCTTTGTACAGTGGCAGTATTGCCAGAGTTAGACCCTTGTATATATAAAATCA  
>HPV52\_Alpha\_397038\_nt6671\_L1\_Tile\_rc|1  
TTTCATTTTTATATGTGCTTTTCCTTTTTAACCTCAGCACATAAAGTCATGTTAGTGCTAC  
>HPV52\_Alpha\_397038\_nt6781\_L1\_Tile\_rc|1  
ATCCATCTTATGAATGTATGTCATAACATCAGCTGTTAATGTAATTTTGCACAATTGAAA  
>HPV52\_Alpha\_397038\_nt6786\_L1\_Tile\_rc|1  
GTGGCATCCATCTTATGAATGTATGTCATAACATCAGCTGTTAATGTAATTTTGCACAAT  
>HPV52\_Alpha\_397038\_nt6791\_L1\_Tile\_rc|1  
AAATAGTGGCATCCATCTTATGAATGTATGTCATAACATCAGCTGTTAATGTAATTTTGC  
>HPV52\_Alpha\_397038\_nt6891\_L1\_Tile\_rc|1  
GTGTTTTTTTGACAAGTTATAGCAGTAGAAGTGACAAATCTGTATGTGTCTCCAAAGAT  
>HPV52\_Alpha\_397038\_nt6906\_L1\_Tile\_rc|1  
TTTCCTTTAGGTGGTGTGTTTTTTTGACAAGTTATAGCAGTAGAAGTGACAAATCTGTAT  
>HPV52\_Alpha\_397038\_nt6911\_L1\_Tile\_rc|1  
CTTCCTTTCCCTTTAGGTGGTGTGTTTTTTTGACAAGTTATAGCAGTAGAAGTGACAAATC  
>HPV52\_Alpha\_397038\_nt6916\_L1\_Tile\_rc|1  
AGGATCTTCCTTTCCCTTTAGGTGGTGTGTTTTTTTGACAAGTTATAGCAGTAGAAGTGAC  
>HPV52\_Alpha\_397038\_nt6931\_L1\_Tile\_rc|1  
CATATAGTCCCTTTAAAGGATCTTCCTTTCCCTTTAGGTGGTGTGTTTTTTTGACAAGTTAT  
>HPV52\_Alpha\_397038\_nt7041\_L1\_Tile\_rc|1  
CGTTTTAGTTTGGGCCTAGCCTGTAGCCCTGCCTGTAACAAAAACTTCCTACCTAAAGGA  
>HPV52\_Alpha\_397038\_nt7046\_L1\_Tile\_rc|1  
CAGGGCGTTTTAGTTTGGGCCTAGCCTGTAGCCCTGCCTGTAACAAAAACTTCCTACCTA  
>HPV52\_Alpha\_397038\_nt7051\_L1\_Tile\_rc|1  
TGATGCAGGGCGTTTTAGTTTGGGCCTAGCCTGTAGCCCTGCCTGTAACAAAAACTTCCT  
>HPV52\_Alpha\_397038\_nt7056\_L1\_Tile\_rc|1  
GCCGATGATGCAGGGCGTTTTAGTTTGGGCCTAGCCTGTAGCCCTGCCTGTAACAAAAAC  
>HPV52\_Alpha\_397038\_nt7071\_L1\_Tile\_rc|1  
GTGGAGGTACGTGGGGCCGATGATGCAGGGCGTTTTAGTTTGGGCCTAGCCTGTAGCCCT  
>HPV52\_Alpha\_397038\_nt7076\_L1\_Tile\_rc|1  
TCTTTGTGGAGGTACGTGGGGCCGATGATGCAGGGCGTTTTAGTTTGGGCCTAGCCTGTA  
>HPV52\_Alpha\_397038\_nt7081\_L1\_Tile\_rc|1  
TTTCTTCTTTGTGGAGGTACGTGGGGCCGATGATGCAGGGCGTTTTAGTTTGGGCCTAGC  
>HPV52\_Alpha\_397038\_nt7086\_L1\_Tile\_rc|1  
ACCTTTTTCTTCTTTGTGGAGGTACGTGGGGCCGATGATGCAGGGCGTTTTAGTTTGGGC  
>HPV52\_Alpha\_397038\_nt7091\_L1\_Tile\_rc|1  
TTTTAACCTTTTTCTTCTTTGTGGAGGTACGTGGGGCCGATGATGCAGGGCGTTTTAGTT  
>HPV52\_Alpha\_397038\_nt7096\_L1\_Tile\_rc|1  
TTACCTTTTAACCTTTTTCTTCTTTGTGGAGGTACGTGGGGCCGATGATGCAGGGCGTTT  
>HPV53\_Alpha\_9627377\_nt5751\_L1\_Tile\_rc|1  
ATGGGGTAATAAGGATGTCCACGGTAAGCAAGCGAGAGCTTCCAGCATGATAAAATATA  
>HPV53\_Alpha\_9627377\_nt5791\_L1\_Tile\_rc|1  
TGCAGACACCTTAGGGATGTCTGCTTTACCAGATTTAGAAATGGGGTAATAAGGATGTCC  
>HPV53\_Alpha\_9627377\_nt5796\_L1\_Tile\_rc|1  
TGAAATGCAGACACCTTAGGGATGTCTGCTTTACCAGATTTAGAAATGGGGTAATAAGGA  
>HPV53\_Alpha\_9627377\_nt6136\_L1\_Tile\_rc|1  
CGCTGTAGTAGGTGTGGAACGACAGGCCGTACCCTTTGTCCAGTGTTACCTATAGCGGG  
>HPV53\_Alpha\_9627377\_nt6161\_L1\_Tile\_rc|1  
TAAGTTCCAATGGGGGGCAGTCGCCCCTGTAGTAGGTGTGGAACGACAGGCCGTACCCT  
>HPV53\_Alpha\_9627377\_nt6176\_L1\_Tile\_rc|1  
CAATAGGTGAATTGATAAGTTCCAATGGGGGGCAGTCGCCCCTGTAGTAGGTGTGGAAC

>HPV53\_Alpha\_9627377\_nt6251\_L1\_Tile\_rc|1  
GCACATCAGATTTAGATTCTTGCAAAGCTTTAAAGTTTAATGCACCAAAACCTGTGTCCA  
>HPV53\_Alpha\_9627377\_nt6441\_L1\_Tile\_rc|1  
TCCCTGCCATTACTACCCTTAATATATAAGTCATTAGGTATTTCTCACCATAACGCCT  
>HPV53\_Alpha\_9627377\_nt6456\_L1\_Tile\_rc|1  
GAGCTAGGGGGCGGGTCCCTGCCATTACTACCCTTAATATATAAGTCATTAGGTATTTCC  
>HPV53\_Alpha\_9627377\_nt6461\_L1\_Tile\_rc|1  
ATACAGAGCTAGGGGGCGGGTCCCTGCCATTACTACCCTTAATATATAAGTCATTAGGTA  
>HPV53\_Alpha\_9627377\_nt6466\_L1\_Tile\_rc|1  
AACATATACAGAGCTAGGGGGCGGGTCCCTGCCATTACTACCCTTAATATATAAGTCATT  
>HPV53\_Alpha\_9627377\_nt6816\_L1\_Tile\_rc|1  
ACAGGAGGCGACAAACCTATATTCCAGTCTTCCAGTAAGGTAGAATTCATAGTATGTAAA  
>HPV53\_Alpha\_9627377\_nt6821\_L1\_Tile\_rc|1  
TGGCAACAGGAGGCGACAAACCTATATTCCAGTCTTCCAGTAAGGTAGAATTCATAGTAT  
>HPV53\_Alpha\_9627377\_nt6831\_L1\_Tile\_rc|1  
TCTAAGCTAGTGGCAACAGGAGGCGACAAACCTATATTCCAGTCTTCCAGTAAGGTAGAA  
>HPV53\_Alpha\_9627377\_nt6946\_L1\_Tile\_rc|1  
GTTTTGCAAATTGACCTCCCAAATTTATATTTAGATAGTGGGTCCTGCTTTTCAGGAGG  
>HPV53\_Alpha\_9627377\_nt6966\_L1\_Tile\_rc|1  
TCCAAATCAGCAGAAAACTGTTTTGCAAATTGACCTCCCAAATTTATATTTAGATAGT  
>HPV53\_Alpha\_9627377\_nt6991\_L1\_Tile\_rc|1  
AAACTTCCTGCCAAGAGGAACTGATCCAAATCAGCAGAAAACTGTTTTGCAAATTGAC  
>HPV53\_Alpha\_9627377\_nt6996\_L1\_Tile\_rc|1  
ATTAATAAATCTCCTGCCAAGAGGAACTGATCCAAATCAGCAGAAAACTGTTTTGCAA  
>HPV53\_Alpha\_9627377\_nt7081\_L1\_Tile\_rc|1  
CTTGAGGAGGGGGCTGAGGTAGATGTAGTAGAAGCAGAGCGTTTTTTAGAGGATACAGG  
>HPV53\_Alpha\_9627377\_nt7086\_L1\_Tile\_rc|1  
TTGCGCTTGAGGAGGGGGCTGAGGTAGATGTAGTAGAAGCAGAGCGTTTTTTAGAGGAT  
>HPV54\_Alpha\_9628437\_nt5985\_L1\_Tile\_rc|1  
TAACATTTTCCCTATTGTCAGCTCCTGCACCAACATATTTAGGTGCATTTTCAGTATCAT  
>HPV54\_Alpha\_9628437\_nt5995\_L1\_Tile\_rc|1  
TAGTCCATGCTAACATTTTCCCTATTGTCAGCTCCTGCACCAACATATTTAGGTGCATTT  
>HPV54\_Alpha\_9628437\_nt6085\_L1\_Tile\_rc|1  
GCCAATGTATTAGGTGTACATAGGTTGCCTTTAGCCCAGTGTTACCTATAGGTGGTGTG  
>HPV54\_Alpha\_9628437\_nt6095\_L1\_Tile\_rc|1  
GTCACCAGCAGCCAATGTATTAGGTGTACATAGGTTGCCTTTAGCCCAGTGTTACCTAT  
>HPV54\_Alpha\_9628437\_nt6215\_L1\_Tile\_rc|1  
TACATCAAGGGGTACCTCACTTTTTGAGGTTTGTAGGGTTTTAAATCCATAGCCCCAAA  
>HPV54\_Alpha\_9628437\_nt6220\_L1\_Tile\_rc|1  
GTAGCTACATCAAGGGGTACCTCACTTTTTGAGGTTTGTAGGGTTTTAAATCCATAGCC  
>HPV54\_Alpha\_9628437\_nt6225\_L1\_Tile\_rc|1  
TTGAGGTAGCTACATCAAGGGGTACCTCACTTTTTGAGGTTTGTAGGGTTTTAAATCCA  
>HPV54\_Alpha\_9628437\_nt6235\_L1\_Tile\_rc|1  
TATTTACAAATTGAGGTAGCTACATCAAGGGGTACCTCACTTTTTGAGGTTTGTAGGGTT  
>HPV54\_Alpha\_9628437\_nt6240\_L1\_Tile\_rc|1  
CAGGATATTTACAAATTGAGGTAGCTACATCAAGGGGTACCTCACTTTTTGAGGTTTGT  
>HPV54\_Alpha\_9628437\_nt6250\_L1\_Tile\_rc|1  
TTAAGGTAATCAGGATATTTACAAATTGAGGTAGCTACATCAAGGGGTACCTCACTTTTT  
>HPV54\_Alpha\_9628437\_nt6415\_L1\_Tile\_rc|1  
GCAGCATAAATAGAACTGTCAAGGTTACCTGAGGATTTCTTAATGTATAAGTCATTAGGT  
>HPV54\_Alpha\_9628437\_nt6585\_L1\_Tile\_rc|1  
TGGATGCTGTAGCACACAATGTTAGGTTAGTACTACGGGTGGTATCTACAACCTGTTAAAA  
>HPV54\_Alpha\_9628437\_nt6605\_L1\_Tile\_rc|1  
ATTATTAAGCTATCCTGCGTGGATGCTGTAGCACACAATGTTAGGTTAGTACTACGGGT  
>HPV54\_Alpha\_9628437\_nt6610\_L1\_Tile\_rc|1

TCAGAATTATTAAAGCTATCCTGCGTGGATGCTGTAGCACACAATGTTAGGTTAGTACTA  
>HPV54\_Alpha\_9628437\_nt6615\_L1\_Tile\_rc|1  
TAAAGTCAGAATTATTAAAGCTATCCTGCGTGGATGCTGTAGCACACAATGTTAGGTTAG  
>HPV54\_Alpha\_9628437\_nt6620\_L1\_Tile\_rc|1  
CTCCCTAAAGTCAGAATTATTAAAGCTATCCTGCGTGGATGCTGTAGCACACAATGTTAG  
>HPV54\_Alpha\_9628437\_nt6625\_L1\_Tile\_rc|1  
ATATACTCCCTAAAGTCAGAATTATTAAAGCTATCCTGCGTGGATGCTGTAGCACACAAT  
>HPV54\_Alpha\_9628437\_nt6635\_L1\_Tile\_rc|1  
CACATGTCTAATACTACTCCCTAAAGTCAGAATTATTAAAGCTATCCTGCGTGGATGCTGT  
>HPV54\_Alpha\_9628437\_nt6725\_L1\_Tile\_rc|1  
AGTGGGATTCATTCCATGAATATAGGCCATAACATCTGCTGTAAGGGTTATGGTACATAA  
>HPV54\_Alpha\_9628437\_nt6730\_L1\_Tile\_rc|1  
AGAATAGTGGGATTCATTCCATGAATATAGGCCATAACATCTGCTGTAAGGGTTATGGTA  
>HPV54\_Alpha\_9628437\_nt6735\_L1\_Tile\_rc|1  
CCTCTAGAATAGTGGGATTCATTCCATGAATATAGGCCATAACATCTGCTGTAAGGGTTA  
>HPV54\_Alpha\_9628437\_nt6770\_L1\_Tile\_rc|1  
ACTTGTAGCTGGGGGGTTATACCAAAGTTCAGTCCTCTAGAATAGTGGGATTCATTCC  
>HPV54\_Alpha\_9628437\_nt6805\_L1\_Tile\_rc|1  
TGTGACTGTACAAACCTATATGTGTCTCCAAACTACTTGTAGCTGGGGGGTTATACCA  
>HPV54\_Alpha\_9628437\_nt6915\_L1\_Tile\_rc|1  
CAAGGTCAGATGAAAATCGTTTCCTTAAGGTCAACAGTCCAAAAATTAAATTTACTGTAAG  
>HPV54\_Alpha\_9628437\_nt6920\_L1\_Tile\_rc|1  
CTGGTCAAGGTCAGATGAAAATCGTTTCCTTAAGGTCAACAGTCCAAAAATTAAATTTACT  
>HPV54\_Alpha\_9628437\_nt6925\_L1\_Tile\_rc|1  
GGAAACTGGTCAAGGTCAGATGAAAATCGTTTCCTTAAGGTCAACAGTCCAAAAATTAAAT  
>HPV54\_Alpha\_9628437\_nt6930\_L1\_Tile\_rc|1  
CCAAGGGAACTGGTCAAGGTCAGATGAAAATCGTTTCCTTAAGGTCAACAGTCCAAAAAT  
>HPV54\_Alpha\_9628437\_nt6990\_L1\_Tile\_rc|1  
GCTTTACAGGCCGAAGGCGCGGACGTGCACGTAGGCCAGCCTGTAGTAAAAACTTGCGAC  
>HPV54\_Alpha\_9628437\_nt6995\_L1\_Tile\_rc|1  
TGCACGCTTTACAGGCCGAAGGCGCGGACGTGCACGTAGGCCAGCCTGTAGTAAAAACTT  
>HPV55\_Alpha\_1020266\_nt6470\_L1\_Tile\_rc|1  
TAGTAGCACCTTTAAAAACCAAATCCTGTGGAATGTCCTCTCCAACCGTTCCCGCCCTAT  
>HPV55\_Alpha\_1020266\_nt6480\_L1\_Tile\_rc|1  
ACTGTACTTTTAGTAGCACCTTTAAAAACCAAATCCTGTGGAATGTCCTCTCCAACCGTT  
>HPV55\_Alpha\_1020266\_nt6495\_L1\_Tile\_rc|1  
TATATGGCATTAGGAAGTGTACTTTTAGTAGCACCTTTAAAAACCAAATCCTGTGGAATG  
>HPV55\_Alpha\_1020266\_nt6705\_L1\_Tile\_rc|1  
TATTCTGTACTATTATATGTTGTAGATGGAGACTGAGTTGTAGCAGCACATATTGTCATG  
>HPV55\_Alpha\_1020266\_nt6715\_L1\_Tile\_rc|1  
GTATTGTTTATATTCTGTACTATTATATGTTGTAGATGGAGACTGAGTTGTAGCAGCACA  
>HPV55\_Alpha\_1020266\_nt6720\_L1\_Tile\_rc|1  
CGCATGTATTGTTTATATTCTGTACTATTATATGTTGTAGATGGAGACTGAGTTGTAGCA  
>HPV56\_Alpha\_397053\_nt5708\_L1\_Tile\_rc|1  
GTATTGTCCCTAGTCACAGAGTAATAGGGATGTCCTACGGCAAGCAATCGTGAAGTGCCT  
>HPV56\_Alpha\_397053\_nt5713\_L1\_Tile\_rc|1  
TTTTGGTATTGTCCTTAGTCACAGAGTAATAGGGATGTCCTACGGCAAGCAATCGTGAAC  
>HPV56\_Alpha\_397053\_nt5728\_L1\_Tile\_rc|1  
CTTTGGGAATGTTTGTGTTTGGTATTGTCCTTAGTCACAGAGTAATAGGGATGTCCTACGG  
>HPV56\_Alpha\_397053\_nt6033\_L1\_Tile\_rc|1  
ACCCATAGCGGGAGTACATCCAACAATACACAACGTGTGTTTGCTTGCCATCAACTGATAT  
>HPV56\_Alpha\_397053\_nt6058\_L1\_Tile\_rc|1  
ACACAGCACCTTTAGTCCAATGTTACCCATAGCGGGAGTACATCCAACAATACACAAC  
>HPV56\_Alpha\_397053\_nt6068\_L1\_Tile\_rc|1  
GTGGACTTACACACAGCACCTTTAGTCCAATGTTACCCATAGCGGGAGTACATCCAACA



>HPV56\_Alpha\_397053\_nt6073\_L1\_Tile\_rc|1  
CTTGTGTGGACTTACACACAGCACCTTTAGTCCAATGTTACCCATAGCGGGAGTACATC  
>HPV56\_Alpha\_397053\_nt6078\_L1\_Tile\_rc|1  
GGTAACTTGTGTGGACTTACACACAGCACCTTTAGTCCAATGTTACCCATAGCGGGAGT  
>HPV56\_Alpha\_397053\_nt6083\_L1\_Tile\_rc|1  
CCTGTGGTAACTTGTGTGGACTTACACACAGCACCTTTAGTCCAATGTTACCCATAGCG  
>HPV56\_Alpha\_397053\_nt6108\_L1\_Tile\_rc|1  
AATTAATGCAAGAGGCGGGCAGTCCCCTGTGGTAACTTGTGTGGACTTACACACAGCACC  
>HPV56\_Alpha\_397053\_nt6118\_L1\_Tile\_rc|1  
TAGGTGTATTAATTAATGCAAGAGGCGGGCAGTCCCCTGTGGTAACTTGTGTGGACTTAC  
>HPV56\_Alpha\_397053\_nt6128\_L1\_Tile\_rc|1  
CCATCCTCTATAGGTGTATTAATTAATGCAAGAGGCGGGCAGTCCCCTGTGGTAACTTGT  
>HPV56\_Alpha\_397053\_nt6368\_L1\_Tile\_rc|1  
TTTAAATATAACTCTGCAGGTATTGTTTCCCCAACTTTACCAGCCCTATTAAAATAATGT  
>HPV56\_Alpha\_397053\_nt6383\_L1\_Tile\_rc|1  
CTACCATTGCTACCCCTTAAATATAACTCTGCAGGTATTGTTTCCCCAACTTTACCAGCC  
>HPV56\_Alpha\_397053\_nt6408\_L1\_Tile\_rc|1  
ATATACAGAACTCGGAGGGGGTTCTCTACCATTGCTACCCCTTAAATATAACTCTGCAGG  
>HPV56\_Alpha\_397053\_nt6413\_L1\_Tile\_rc|1  
GCAACATATACAGAACTCGGAGGGGGTTCTCTACCATTGCTACCCCTTAAATATAACTCT  
>HPV56\_Alpha\_397053\_nt6588\_L1\_Tile\_rc|1  
TAACTGTTCTGTAGCAGTACTAATAGTCATGTTAGTACTTCTAGTAGTATCTACTACAGT  
>HPV56\_Alpha\_397053\_nt6593\_L1\_Tile\_rc|1  
TTACTTAACTGTTCTGTAGCAGTACTAATAGTCATGTTAGTACTTCTAGTAGTATCTACT  
>HPV56\_Alpha\_397053\_nt6608\_L1\_Tile\_rc|1  
TTTCGTGCATCATATTTACTTAACTGTTCTGTAGCAGTACTAATAGTCATGTTAGTACTT  
>HPV56\_Alpha\_397053\_nt6613\_L1\_Tile\_rc|1  
TAATTTTTTCGTGCATCATATTTACTTAACTGTTCTGTAGCAGTACTAATAGTCATGTTAG  
>HPV56\_Alpha\_397053\_nt6618\_L1\_Tile\_rc|1  
CTGATTAATTTTTTCGTGCATCATATTTACTTAACTGTTCTGTAGCAGTACTAATAGTCAT  
>HPV56\_Alpha\_397053\_nt6628\_L1\_Tile\_rc|1  
GTCTAAGGTACTGATTAATTTTTTCGTGCATCATATTTACTTAACTGTTCTGTAGCAGTAC  
>HPV56\_Alpha\_397053\_nt6633\_L1\_Tile\_rc|1  
CACATGTCTAAGGTACTGATTAATTTTTTCGTGCATCATATTTACTTAACTGTTCTGTAGC  
>HPV56\_Alpha\_397053\_nt6773\_L1\_Tile\_rc|1  
AGGCTGGTGGCCACTGGCGGGGATAACCCAATATTCCAGTCCCTCCAGTAGGTTAGCATTC  
>HPV56\_Alpha\_397053\_nt6778\_L1\_Tile\_rc|1  
CTTCTAGGCTGGTGGCCACTGGCGGGGATAACCCAATATTCCAGTCCCTCCAGTAGGTTAG  
>HPV56\_Alpha\_397053\_nt6803\_L1\_Tile\_rc|1  
GTGCTTCTAACATATCTATATTTATCTTCTAGGCTGGTGGCCACTGGCGGGGATAACCCA  
>HPV56\_Alpha\_397053\_nt6808\_L1\_Tile\_rc|1  
TAGCTGTGCTTCTAACATATCTATATTTATCTTCTAGGCTGGTGGCCACTGGCGGGGATA  
>HPV56\_Alpha\_397053\_nt6818\_L1\_Tile\_rc|1  
TGACATGTTATAGCTGTGCTTCTAACATATCTATATTTATCTTCTAGGCTGGTGGCCACT  
>HPV56\_Alpha\_397053\_nt6988\_L1\_Tile\_rc|1  
GCTTTTTAGAGGTAGCTACAGCAGGCTTTGACCTAGTGCCCAGTTGCATTAAAAATTTTC  
>HPV56\_Alpha\_397053\_nt6993\_L1\_Tile\_rc|1  
AGATCGCTTTTTAGAGGTAGCTACAGCAGGCTTTGACCTAGTGCCCAGTTGCATTAAAAA  
>HPV56\_Alpha\_397053\_nt6998\_L1\_Tile\_rc|1  
GGAGCAGATCGCTTTTTAGAGGTAGCTACAGCAGGCTTTGACCTAGTGCCCAGTTGCATT  
>HPV56\_Alpha\_397053\_nt7013\_L1\_Tile\_rc|1  
GTAGAGGTGGAGGTAGGAGCAGATCGCTTTTTAGAGGTAGCTACAGCAGGCTTTGACCTA  
>HPV56\_Alpha\_397053\_nt7023\_L1\_Tile\_rc|1  
TTTTGCTGGTGTAGAGGTGGAGGTAGGAGCAGATCGCTTTTTAGAGGTAGCTACAGCAGG  
>HPV57\_Alpha\_60882\_nt5879\_L1\_Tile\_rc|1

GCACAGACACCTTATTATTGCCACTTTTTTTTATAGAATAATATGGATGGCCTACTGTGA  
>HPV57\_Alpha\_60882\_nt5884\_L1\_Tile\_rc|1  
CTTGGGCACAGACACCTTATTATTGCCACTTTTTTTTATAGAATAATATGGATGGCCTAC  
>HPV57\_Alpha\_60882\_nt5894\_L1\_Tile\_rc|1  
AGCCCCGATACCTTGGGCACAGACACCTTATTATTGCCACTTTTTTTTATAGAATAATATG  
>HPV57\_Alpha\_60882\_nt5989\_L1\_Tile\_rc|1  
CAGCAGACGCTGGGTGTCGGGATCATAGAGGTTGGCATCAGGCAGACCAAACCTATTAGG  
>HPV57\_Alpha\_60882\_nt6094\_L1\_Tile\_rc|1  
ATTGTGTGAATTTTCAGTATCATCCTGTTTGTATAATAAGGGTGGCCGGATATCCCTAC  
>HPV57\_Alpha\_60882\_nt6099\_L1\_Tile\_rc|1  
TCGGGATTGTGTGAATTTTCAGTATCATCCTGTTTGTATAATAAGGGTGGCCGGATATC  
>HPV57\_Alpha\_60882\_nt6349\_L1\_Tile\_rc|1  
CAAGGGGACATCTGATTTGTTGGACTGTAGAGCGGCAAAATCCAGCGCCCCGAACCCGGT  
>HPV57\_Alpha\_60882\_nt6364\_L1\_Tile\_rc|1  
GTTAGTACAGATATCCAAGGGGACATCTGATTTGTTGGACTGTAGAGCGGCAAAATCCAG  
>HPV57\_Alpha\_60882\_nt6369\_L1\_Tile\_rc|1  
CATATGTTAGTACAGATATCCAAGGGGACATCTGATTTGTTGGACTGTAGAGCGGCAAAA  
>HPV57\_Alpha\_60882\_nt6389\_L1\_Tile\_rc|1  
TCAGATAGTCTGGATATTTACATATGTTAGTACAGATATCCAAGGGGACATCTGATTTGT  
>HPV57\_Alpha\_60882\_nt6534\_L1\_Tile\_rc|1  
GTCTGGACGGTAGAACTCTTGACATATAGCTCATCCGGGAGGGCGTCACCCATCGACCCA  
>HPV57\_Alpha\_60882\_nt6539\_L1\_Tile\_rc|1  
CGGGGGTCTGGACGGTAGAACTCTTGACATATAGCTCATCCGGGAGGGCGTCACCCATCG  
>HPV57\_Alpha\_60882\_nt6544\_L1\_Tile\_rc|1  
ACTACCGGGGGTCTGGACGGTAGAACTCTTGACATATAGCTCATCCGGGAGGGCGTCACC  
>HPV57\_Alpha\_60882\_nt6549\_L1\_Tile\_rc|1  
ACATAACTACCGGGGGTCTGGACGGTAGAACTCTTGACATATAGCTCATCCGGGAGGGCG  
>HPV57\_Alpha\_60882\_nt6554\_L1\_Tile\_rc|1  
TATAAACATAACTACCGGGGGTCTGGACGGTAGAACTCTTGACATATAGCTCATCCGGGA  
>HPV57\_Alpha\_60882\_nt6559\_L1\_Tile\_rc|1  
GGAGGTATAAACATAACTACCGGGGGTCTGGACGGTAGAACTCTTGACATATAGCTCATC  
>HPV57\_Alpha\_60882\_nt6564\_L1\_Tile\_rc|1  
GGAGTGGAGGTATAAACATAACTACCGGGGGTCTGGACGGTAGAACTCTTGACATATAGC  
>HPV57\_Alpha\_60882\_nt6754\_L1\_Tile\_rc|1  
ATTGGAGGCTTTATAATTAGTTTCTGTGTTACAGTGGCACACAAAGAGACATTTGTGCT  
>HPV57\_Alpha\_60882\_nt6759\_L1\_Tile\_rc|1  
TTATAATTGGAGGCTTTATAATTAGTTTCTGTGTTACAGTGGCACACAAAGAGACATTT  
>HPV57\_Alpha\_60882\_nt6944\_L1\_Tile\_rc|1  
ATTGCAAATACCTGTAGGTGTCCTGCAGGCTGGCGGACGGGGGTGGGGGGACACCAAAGT  
>HPV57\_Alpha\_60882\_nt6984\_L1\_Tile\_rc|1  
GTCTTAGGGGGTGTGGGCTTCTGACATGTTATCGCTTGGGATTGCAAATACCTGTAGGTG  
>HPV58\_Alpha\_222386\_nt5766\_L1\_Tile\_rc|1  
ACTTTTTTATTGTTATTGGGACTTTTGATGGAAAAATATGGATTGCCAACAGCCAAAAGT  
>HPV58\_Alpha\_222386\_nt5776\_L1\_Tile\_rc|1  
GGGAACATAACTTTTTTATTGTTATTGGGACTTTTGATGGAAAAATATGGATTGCCAAC  
>HPV58\_Alpha\_222386\_nt5786\_L1\_Tile\_rc|1  
CTGATACCTTGGGAACATAACTTTTTTATTGTTATTGGGACTTTTGATGGAAAAATATG  
>HPV58\_Alpha\_222386\_nt5791\_L1\_Tile\_rc|1  
TAAGCCTGATACCTTGGGAACATAACTTTTTTATTGTTATTGGGACTTTTGATGGAAAA  
>HPV58\_Alpha\_222386\_nt5796\_L1\_Tile\_rc|1  
TACTGTAAGCCTGATACCTTGGGAACATAACTTTTTTATTGTTATTGGGACTTTTGATG  
>HPV58\_Alpha\_222386\_nt5801\_L1\_Tile\_rc|1  
CCCTATACTGTAAGCCTGATACCTTGGGAACATAACTTTTTTATTGTTATTGGGACTTT  
>HPV58\_Alpha\_222386\_nt5806\_L1\_Tile\_rc|1  
AAAGACCCTATACTGTAAGCCTGATACCTTGGGAACATAACTTTTTTATTGTTATTGGG

>HPV58\_Alpha\_222386\_nt6166\_L1\_Tile\_rc|1  
AATAGAATTAAAAAGTTCCAATGGAGGACAATCAGTAGCAGCTGCATTATTGTTACAGGC  
>HPV58\_Alpha\_222386\_nt6431\_L1\_Tile\_rc|1  
TATTACCGGACCCCTTTAATATAAAGGTCATCCGGGACAGCCTCGCCAAGTTTTCCAGCCC  
>HPV58\_Alpha\_222386\_nt6436\_L1\_Tile\_rc|1  
TGCAGTATTACCGGACCCCTTTAATATAAAGGTCATCCGGGACAGCCTCGCCAAGTTTTCC  
>HPV58\_Alpha\_222386\_nt6441\_L1\_Tile\_rc|1  
ATAACTGCAGTATTACCGGACCCCTTTAATATAAAGGTCATCCGGGACAGCCTCGCCAAGT  
>HPV58\_Alpha\_222386\_nt6446\_L1\_Tile\_rc|1  
TTTGGATAACTGCAGTATTACCGGACCCCTTTAATATAAAGGTCATCCGGGACAGCCTCGC  
>HPV58\_Alpha\_222386\_nt6456\_L1\_Tile\_rc|1  
AATGCACTACTTTGGATAACTGCAGTATTACCGGACCCCTTTAATATAAAGGTCATCCGGG  
>HPV58\_Alpha\_222386\_nt6461\_L1\_Tile\_rc|1  
GAAAAAATGCACTACTTTGGATAACTGCAGTATTACCGGACCCCTTTAATATAAAGGTCAT  
>HPV58\_Alpha\_222386\_nt6466\_L1\_Tile\_rc|1  
AGTTGGAAAAAATGCACTACTTTGGATAACTGCAGTATTACCGGACCCCTTTAATATAAAG  
>HPV58\_Alpha\_222386\_nt7041\_L1\_Tile\_rc|1  
GTAGTAGGGGCCGAACGTTTTAGTCTGGGCTTTGCTTTAAGGCCTGATTGTAATAAAAC  
>HPV58\_Alpha\_222386\_nt7046\_L1\_Tile\_rc|1  
CACGGGTAGTAGGGGCCGAACGTTTTAGTCTGGGCTTTGCTTTAAGGCCTGATTGTAATA  
>HPV58\_Alpha\_222386\_nt7051\_L1\_Tile\_rc|1  
TGGTGCACGGGTAGTAGGGGCCGAACGTTTTAGTCTGGGCTTTGCTTTAAGGCCTGATTG  
>HPV58\_Alpha\_222386\_nt7056\_L1\_Tile\_rc|1  
GTGGATGGTGCACGGGTAGTAGGGGCCGAACGTTTTAGTCTGGGCTTTGCTTTAAGGCCT  
>HPV59\_Alpha\_557236\_nt5647\_L1\_Tile\_rc|1  
AAATACTGGTACGGGTGACATACTCATCAGTGCTGACAACCTTAGCTACCGAAGGTGGAG  
>HPV59\_Alpha\_557236\_nt5652\_L1\_Tile\_rc|1  
GTAGAAAATACTGGTACGGGTGACATACTCATCAGTGCTGACAACCTTAGCTACCGAAGG  
>HPV59\_Alpha\_557236\_nt5662\_L1\_Tile\_rc|2  
TGCCTGCGTGGTAGAAAATACTGGTACGGGTGACATACTCATCAGTGCTGACAACCTTAG  
>HPV59\_Alpha\_557236\_nt5677\_L1\_Tile\_rc|1  
TAAGAAGTCTGGAAGTGCCTGCGTGGTAGAAAATACTGGTACGGGTGACATACTCATCAG  
>HPV59\_Alpha\_557236\_nt5682\_L1\_Tile\_rc|2  
AACTGTAAGAAGTCTGGAAGTGCCTGCGTGGTAGAAAATACTGGTACGGGTGACATACTC  
>HPV59\_Alpha\_557236\_nt5722\_L1\_Tile\_rc|2  
TACCATTACCACCTTTAGGTACTTTAAAATATGGATGTCCAACCTGTAAGAAGTCTGGAAC  
>HPV59\_Alpha\_557236\_nt5727\_L1\_Tile\_rc|1  
CTGTCTACCATTACCACCTTTAGGTACTTTAAAATATGGATGTCCAACCTGTAAGAAGTCT  
>HPV59\_Alpha\_557236\_nt5842\_L1\_Tile\_rc|2  
CCAAGCGTTGAGAGTTAGGATCATATACTGTGTTATCTGGAAGGCCAAAATTTATTGGGAT  
>HPV59\_Alpha\_557236\_nt5862\_L1\_Tile\_rc|2  
AACACCTACACAGGCCCAGACCAAGCGTTGAGAGTTAGGATCATATACTGTGTTATCTGG  
>HPV59\_Alpha\_557236\_nt5972\_L1\_Tile\_rc|1  
TCTTTGGTATCAACAGCAGATGCTACATGAGAGTTTTTCAGTGTCATCCAATTTATTATAT  
>HPV59\_Alpha\_557236\_nt5977\_L1\_Tile\_rc|1  
GTGTATCTTTGGTATCAACAGCAGATGCTACATGAGAGTTTTTCAGTGTCATCCAATTTAT  
>HPV59\_Alpha\_557236\_nt5982\_L1\_Tile\_rc|2  
ATCACGTGTATCTTTGGTATCAACAGCAGATGCTACATGAGAGTTTTTCAGTGTCATCCAA  
>HPV59\_Alpha\_557236\_nt5987\_L1\_Tile\_rc|1  
ACATTATCACGTGTATCTTTGGTATCAACAGCAGATGCTACATGAGAGTTTTTCAGTGTC  
>HPV59\_Alpha\_557236\_nt6002\_L1\_Tile\_rc|2  
TTATAATCCACAGATACATTATCACGTGTATCTTTGGTATCAACAGCAGATGCTACATGA  
>HPV59\_Alpha\_557236\_nt6117\_L1\_Tile\_rc|1  
TAATTCTAGTGGAGGACAATCGCCCTGAACCACAGTAGTAGGCTTACAAGCAGTGCCCTT  
>HPV59\_Alpha\_557236\_nt6127\_L1\_Tile\_rc|1

GTGTATTTATTAATTCTAGTGGAGGACAATCGCCCTGAACCACAGTAGTAGGCTTACAAG  
>HPV59\_Alpha\_557236\_nt6417\_L1\_Tile\_rc|1  
TAAATAACTGCCTGGGTGGGCACGTATGTCAGTACCTTTAATATATAGTGATTCAGGAAG  
>HPV59\_Alpha\_557236\_nt6422\_L1\_Tile\_rc|2  
GAATATAAATAACTGCCTGGGTGGGCACGTATGTCAGTACCTTTAATATATAGTGATTCA  
>HPV59\_Alpha\_557236\_nt6427\_L1\_Tile\_rc|1  
AAGGGGAATATAAATAACTGCCTGGGTGGGCACGTATGTCAGTACCTTTAATATATAGTG  
>HPV59\_Alpha\_557236\_nt6432\_L1\_Tile\_rc|1  
TGGGGAAGGGGAATATAAATAACTGCCTGGGTGGGCACGTATGTCAGTACCTTTAATATA  
>HPV59\_Alpha\_557236\_nt6442\_L1\_Tile\_rc|2  
CAGACCCACTTGGGGAAGGGGAATATAAATAACTGCCTGGGTGGGCACGTATGTCAGTAC  
>HPV59\_Alpha\_557236\_nt6602\_L1\_Tile\_rc|2  
ATAGAAGAAGTAGTAGAAGCACACACAGAAAGATTGGTGCTGCGAGTAGTATCTACAAC  
>HPV59\_Alpha\_557236\_nt6607\_L1\_Tile\_rc|1  
TAGGAATAGAAGAAGTAGTAGAAGCACACACAGAAAGATTGGTGCTGCGAGTAGTATCTA  
>HPV59\_Alpha\_557236\_nt6612\_L1\_Tile\_rc|1  
TACATTAGGAATAGAAGAAGTAGTAGAAGCACACACAGAAAGATTGGTGCTGCGAGTAGT  
>HPV59\_Alpha\_557236\_nt6617\_L1\_Tile\_rc|1  
GTGTATACATTAGGAATAGAAGAAGTAGTAGAAGCACACACAGAAAGATTGGTGCTGCGA  
>HPV59\_Alpha\_557236\_nt6627\_L1\_Tile\_rc|1  
ACTGGTAGGTGTGTATACATTAGGAATAGAAGAAGTAGTAGAAGCACACACAGAAAGATT  
>HPV59\_Alpha\_557236\_nt6632\_L1\_Tile\_rc|1  
TTAAAACCTGGTAGGTGTGTATACATTAGGAATAGAAGAAGTAGTAGAAGCACACACAGAA  
>HPV59\_Alpha\_557236\_nt6637\_L1\_Tile\_rc|1  
ATTCTTTAAAACCTGGTAGGTGTGTATACATTAGGAATAGAAGAAGTAGTAGAAGCACACA  
>HPV59\_Alpha\_557236\_nt6642\_L1\_Tile\_rc|2  
GGCATATTCTTTAAAACCTGGTAGGTGTGTATACATTAGGAATAGAAGAAGTAGTAGAAGC  
>HPV59\_Alpha\_557236\_nt6652\_L1\_Tile\_rc|1  
CCACATGTCTGGCATATTCTTTAAAACCTGGTAGGTGTGTATACATTAGGAATAGAAGAAG  
>HPV59\_Alpha\_557236\_nt6737\_L1\_Tile\_rc|1  
GTATTCATATTATGAATGTATGACATTACCTCTGTAGTTAATGTTATTTTACACAGTTGA  
>HPV59\_Alpha\_557236\_nt6742\_L1\_Tile\_rc|2  
TAGTGGTATTTCATATTATGAATGTATGACATTACCTCTGTAGTTAATGTTATTTTACACA  
>HPV59\_Alpha\_557236\_nt6817\_L1\_Tile\_rc|1  
ATTGAACAAAACGGTATGTGTCAACTAACTAGCAGTAGGAGGTGGTGTAAACACCAAAT  
>HPV59\_Alpha\_557236\_nt6822\_L1\_Tile\_rc|2  
AGCAGATTGAACAAAACGGTATGTGTCAACTAACTAGCAGTAGGAGGTGGTGTAAACACC  
>HPV59\_Alpha\_557236\_nt6827\_L1\_Tile\_rc|1  
ACAGCAGCAGATTGAACAAAACGGTATGTGTCAACTAACTAGCAGTAGGAGGTGGTGTAA  
>HPV59\_Alpha\_557236\_nt6832\_L1\_Tile\_rc|1  
AAGTTACAGCAGCAGATTGAACAAAACGGTATGTGTCAACTAACTAGCAGTAGGAGGTG  
>HPV59\_Alpha\_557236\_nt6842\_L1\_Tile\_rc|2  
TCCTTTTGACAAGTTACAGCAGCAGATTGAACAAAACGGTATGTGTCAACTAACTAGCA  
>HPV59\_Alpha\_557236\_nt6862\_L1\_Tile\_rc|2  
GTTTAACTGGCGGTGCGGTGTCCTTTTGACAAGTTACAGCAGCAGATTGAACAAAACGGT  
>HPV59\_Alpha\_557236\_nt6867\_L1\_Tile\_rc|1  
GTCCTGTTTAACTGGCGGTGCGGTGTCCTTTTGACAAGTTACAGCAGCAGATTGAACAAA  
>HPV59\_Alpha\_557236\_nt6882\_L1\_Tile\_rc|2  
TAGTTTGTGCATAAGGGTCCTGTTTAACTGGCGGTGCGGTGTCCTTTTGACAAGTTACAGC  
>HPV59\_Alpha\_557236\_nt6887\_L1\_Tile\_rc|1  
AACTTTAGTTTGTGCATAAGGGTCCTGTTTAACTGGCGGTGCGGTGTCCTTTTGACAAGTT  
>HPV59\_Alpha\_557236\_nt6892\_L1\_Tile\_rc|1  
GCCAAAACCTTTAGTTTGTGCATAAGGGTCCTGTTTAACTGGCGGTGCGGTGTCCTTTTGAC  
>HPV59\_Alpha\_557236\_nt6907\_L1\_Tile\_rc|1  
CCTTAAGATCTACAGGCCAAAACCTTTAGTTTGTGCATAAGGGTCCTGTTTAACTGGCGGTG

>HPV59\_Alpha\_557236\_nt6912\_L1\_Tile\_rc|1  
CCTTTCCTTAAGATCTACAGGCCAAAACCTTAGTTTGTGCATAAGGGTCCTGTTTAACTGG  
>HPV59\_Alpha\_557236\_nt7042\_L1\_Tile\_rc|2  
GTTTTGGTGATGGGGTAGAGGTAGGGGCAGGCGCTGCACGTTTGCCTGGGCCTATAGTGG  
>HPV59\_Alpha\_557236\_nt7057\_L1\_Tile\_rc|1  
TGCGACGCTTAACACGTTTTTGGTGATGGGGTAGAGGTAGGGGCAGGCGCTGCACGTTTGC  
>HPV60\_Gamma\_9628566\_nt5401\_L1\_Tile\_rc|1  
ACACGAGCAACAGGCTTGCTTGGTGGAAGATACAATTGTCCAGCTGTCTGCAACCAAAGA  
>HPV60\_Gamma\_9628566\_nt5411\_L1\_Tile\_rc|1  
CGTACTGAGTACACGAGCAACAGGCTTGCTTGGTGGAAGATACAATTGTCCAGCTGTCTG  
>HPV60\_Gamma\_9628566\_nt5436\_L1\_Tile\_rc|1  
AATTTGTTGGCTGTACATATTCATCCGTACTGAGTACACGAGCAACAGGCTTGCTTGGTG  
>HPV60\_Gamma\_9628566\_nt5441\_L1\_Tile\_rc|1  
AACTAAATTTGTTGGCTGTACATATTCATCCGTACTGAGTACACGAGCAACAGGCTTGCT  
>HPV60\_Gamma\_9628566\_nt5446\_L1\_Tile\_rc|1  
TGAAAAACTAAATTTGTTGGCTGTACATATTCATCCGTACTGAGTACACGAGCAACAGGC  
>HPV60\_Gamma\_9628566\_nt5451\_L1\_Tile\_rc|1  
CTGTATGAAAACTAAATTTGTTGGCTGTACATATTCATCCGTACTGAGTACACGAGCAA  
>HPV60\_Gamma\_9628566\_nt5456\_L1\_Tile\_rc|1  
AGTTCCTGTATGAAAACTAAATTTGTTGGCTGTACATATTCATCCGTACTGAGTACACG  
>HPV60\_Gamma\_9628566\_nt5461\_L1\_Tile\_rc|1  
CTGTACAGTTCCCTGTATGAAAACTAAATTTGTTGGCTGTACATATTCATCCGTACTGAGT  
>HPV60\_Gamma\_9628566\_nt5466\_L1\_Tile\_rc|1  
GCATTCTGTACAGTTCCCTGTATGAAAACTAAATTTGTTGGCTGTACATATTCATCCGTAC  
>HPV60\_Gamma\_9628566\_nt5471\_L1\_Tile\_rc|1  
AATTAGCATTCTGTACAGTTCCCTGTATGAAAACTAAATTTGTTGGCTGTACATATTCATC  
>HPV60\_Gamma\_9628566\_nt5476\_L1\_Tile\_rc|1  
CCTACAATTAGCATTCTGTACAGTTCCCTGTATGAAAACTAAATTTGTTGGCTGTACATAT  
>HPV60\_Gamma\_9628566\_nt5486\_L1\_Tile\_rc|1  
ATAAGGGTGTCTTACAATTAGCATTCTGTACAGTTCCCTGTATGAAAACTAAATTTGTTGG  
>HPV60\_Gamma\_9628566\_nt5491\_L1\_Tile\_rc|1  
TCAAAATAAGGGTGTCTTACAATTAGCATTCTGTACAGTTCCCTGTATGAAAACTAAATTT  
>HPV60\_Gamma\_9628566\_nt5496\_L1\_Tile\_rc|1  
TAATATCAAAATAAGGGTGTCTTACAATTAGCATTCTGTACAGTTCCCTGTATGAAAACTA  
>HPV60\_Gamma\_9628566\_nt5501\_L1\_Tile\_rc|1  
GTCTATAATATCAAAATAAGGGTGTCTTACAATTAGCATTCTGTACAGTTCCCTGTATGAAA  
>HPV60\_Gamma\_9628566\_nt5506\_L1\_Tile\_rc|1  
CCACTGTCTATAATATCAAAATAAGGGTGTCTTACAATTAGCATTCTGTACAGTTCCCTGTA  
>HPV60\_Gamma\_9628566\_nt5511\_L1\_Tile\_rc|1  
TTGAACCACTGTCTATAATATCAAAATAAGGGTGTCTTACAATTAGCATTCTGTACAGTTC  
>HPV60\_Gamma\_9628566\_nt5516\_L1\_Tile\_rc|1  
ATTATTTGAACCACTGTCTATAATATCAAAATAAGGGTGTCTTACAATTAGCATTCTGTCT  
>HPV60\_Gamma\_9628566\_nt5521\_L1\_Tile\_rc|1  
GTAATATTATTTGAACCACTGTCTATAATATCAAAATAAGGGTGTCTTACAATTAGCATT  
>HPV60\_Gamma\_9628566\_nt5526\_L1\_Tile\_rc|1  
GTACAGTAATATTATTTGAACCACTGTCTATAATATCAAAATAAGGGTGTCTTACAATTA  
>HPV60\_Gamma\_9628566\_nt5531\_L1\_Tile\_rc|1  
TTTAGGTACAGTAATATTATTTGAACCACTGTCTATAATATCAAAATAAGGGTGTCTTAC  
>HPV60\_Gamma\_9628566\_nt5536\_L1\_Tile\_rc|1  
CTACATTTAGGTACAGTAATATTATTTGAACCACTGTCTATAATATCAAAATAAGGGTGT  
>HPV60\_Gamma\_9628566\_nt5541\_L1\_Tile\_rc|1  
TTCCACTACATTTAGGTACAGTAATATTATTTGAACCACTGTCTATAATATCAAAATAAG  
>HPV60\_Gamma\_9628566\_nt5546\_L1\_Tile\_rc|1  
CTGATTTCCACTACATTTAGGTACAGTAATATTATTTGAACCACTGTCTATAATATCAAA  
>HPV60\_Gamma\_9628566\_nt5551\_L1\_Tile\_rc|1

CTAAACTGATTTCCACTACATTTAGGTACAGTAATATTATTTGAACCACTGTCTATAATA  
>HPV60\_Gamma\_9628566\_nt5556\_L1\_Tile\_rc|1  
TAACTCTAAACTGATTTCCACTACATTTAGGTACAGTAATATTATTTGAACCACTGTCTA  
>HPV60\_Gamma\_9628566\_nt5561\_L1\_Tile\_rc|1  
TCGCATAACTCTAAACTGATTTCCACTACATTTAGGTACAGTAATATTATTTGAACCACT  
>HPV60\_Gamma\_9628566\_nt5566\_L1\_Tile\_rc|1  
AGTAGTCGCATAACTCTAAACTGATTTCCACTACATTTAGGTACAGTAATATTATTTGAA  
>HPV60\_Gamma\_9628566\_nt5571\_L1\_Tile\_rc|1  
GAAATAGTAGTCGCATAACTCTAAACTGATTTCCACTACATTTAGGTACAGTAATATTAT  
>HPV60\_Gamma\_9628566\_nt5601\_L1\_Tile\_rc|1  
TGTCTATCATTTGCAAATTTGTTTGGATCTGGAAATAGTAGTCGCATAACTCTAAACTGAT  
>HPV60\_Gamma\_9628566\_nt5606\_L1\_Tile\_rc|1  
AGCTCTGTCTATCATTTGCAAATTTGTTTGGATCTGGAAATAGTAGTCGCATAACTCTAAA  
>HPV60\_Gamma\_9628566\_nt5611\_L1\_Tile\_rc|1  
AAGACAGCTCTGTCTATCATTTGCAAATTTGTTTGGATCTGGAAATAGTAGTCGCATAACT  
>HPV60\_Gamma\_9628566\_nt5616\_L1\_Tile\_rc|1  
GGTTAAAGACAGCTCTGTCTATCATTTGCAAATTTGTTTGGATCTGGAAATAGTAGTCGCA  
>HPV60\_Gamma\_9628566\_nt5626\_L1\_Tile\_rc|1  
TCTCTTTCTGGGTTAAAGACAGCTCTGTCTATCATTTGCAAATTTGTTTGGATCTGGAAAT  
>HPV60\_Gamma\_9628566\_nt5631\_L1\_Tile\_rc|1  
ATCTCTCTCTTTCTGGGTTAAAGACAGCTCTGTCTATCATTTGCAAATTTGTTTGGATCTG  
>HPV60\_Gamma\_9628566\_nt5636\_L1\_Tile\_rc|1  
GACTAATCTCTCTCTTTCTGGGTTAAAGACAGCTCTGTCTATCATTTGCAAATTTGTTTGG  
>HPV60\_Gamma\_9628566\_nt5641\_L1\_Tile\_rc|1  
CTCCAGACTAATCTCTCTCTTTCTGGGTTAAAGACAGCTCTGTCTATCATTTGCAAATTTG  
>HPV60\_Gamma\_9628566\_nt5646\_L1\_Tile\_rc|1  
CCAATCTCCAGACTAATCTCTCTCTTTCTGGGTTAAAGACAGCTCTGTCTATCATTTGCAA  
>HPV60\_Gamma\_9628566\_nt5651\_L1\_Tile\_rc|1  
GCCTTCCAATCTCCAGACTAATCTCTCTCTTTCTGGGTTAAAGACAGCTCTGTCTATCAT  
>HPV60\_Gamma\_9628566\_nt5661\_L1\_Tile\_rc|1  
CAATTTCAAGGCCTTCCAATCTCCAGACTAATCTCTCTCTTTCTGGGTTAAAGACAGCTC  
>HPV60\_Gamma\_9628566\_nt5666\_L1\_Tile\_rc|1  
TCTACCAATTTCAAGGCCTTCCAATCTCCAGACTAATCTCTCTCTTTCTGGGTTAAAGAC  
>HPV60\_Gamma\_9628566\_nt5671\_L1\_Tile\_rc|1  
CCACCTCTACCAATTTCAAGGCCTTCCAATCTCCAGACTAATCTCTCTCTTTCTGGGTTA  
>HPV60\_Gamma\_9628566\_nt5676\_L1\_Tile\_rc|1  
AAGGCCCACCTCTACCAATTTCAAGGCCTTCCAATCTCCAGACTAATCTCTCTCTTTCTG  
>HPV60\_Gamma\_9628566\_nt5761\_L1\_Tile\_rc|1  
TTATTCTGCTTTAAAGGATATGCGGCAGGATTTTCTGTATCTCCATATTTATTAAATAAT  
>HPV60\_Gamma\_9628566\_nt5766\_L1\_Tile\_rc|1  
CACCATTATTCTGCTTTAAAGGATATGCGGCAGGATTTTCTGTATCTCCATATTTATTAA  
>HPV60\_Gamma\_9628566\_nt5771\_L1\_Tile\_rc|1  
GTCATCACCATTATTCTGCTTTAAAGGATATGCGGCAGGATTTTCTGTATCTCCATATTT  
>HPV60\_Gamma\_9628566\_nt5776\_L1\_Tile\_rc|1  
CTATTGTCATCACCATTATTCTGCTTTAAAGGATATGCGGCAGGATTTTCTGTATCTCCA  
>HPV60\_Gamma\_9628566\_nt5781\_L1\_Tile\_rc|1  
CCATTCTATTGTCATCACCATTATTCTGCTTTAAAGGATATGCGGCAGGATTTTCTGTAT  
>HPV60\_Gamma\_9628566\_nt5786\_L1\_Tile\_rc|1  
AACATCCATTCTATTGTCATCACCATTATTCTGCTTTAAAGGATATGCGGCAGGATTTTC  
>HPV60\_Gamma\_9628566\_nt5796\_L1\_Tile\_rc|1  
GATCCATTGAAACATCCATTCTATTGTCATCACCATTATTCTGCTTTAAAGGATATGCGG  
>HPV60\_Gamma\_9628566\_nt5806\_L1\_Tile\_rc|1  
ATTTGTTTTGGATCCATTGAAACATCCATTCTATTGTCATCACCATTATTCTGCTTTAAA  
>HPV60\_Gamma\_9628566\_nt5811\_L1\_Tile\_rc|1  
ATTGCATTTGTTTTGGATCCATTGAAACATCCATTCTATTGTCATCACCATTATTCTGCT

>HPV60\_Gamma\_9628566\_nt5816\_L1\_Tile\_rc|1  
AAACAATTGCATTTGTTTTGGATCCATTGAAACATCCATTCTATTGTCATCACCATTATT  
>HPV60\_Gamma\_9628566\_nt5831\_L1\_Tile\_rc|1  
TTTACATCCTACAATAAACAATTGCATTTGTTTTGGATCCATTGAAACATCCATTCTATT  
>HPV60\_Gamma\_9628566\_nt5836\_L1\_Tile\_rc|1  
GCTGGTTTACATCCTACAATAAACAATTGCATTTGTTTTGGATCCATTGAAACATCCATT  
>HPV60\_Gamma\_9628566\_nt5841\_L1\_Tile\_rc|1  
CAGTGGCTGGTTTACATCCTACAATAAACAATTGCATTTGTTTTGGATCCATTGAAACAT  
>HPV60\_Gamma\_9628566\_nt5866\_L1\_Tile\_rc|1  
GGTTTAGCAATATCCCAGTGTTCACCAGTGGCTGGTTTACATCCTACAATAAACAATTGC  
>HPV60\_Gamma\_9628566\_nt5881\_L1\_Tile\_rc|1  
GGAGCAGGATCACAAAGTTTAGCAATATCCCAGTGTTCACCAGTGGCTGGTTTACATCCT  
>HPV60\_Gamma\_9628566\_nt5886\_L1\_Tile\_rc|1  
TTGCTGGAGCAGGATCACAAAGTTTAGCAATATCCCAGTGTTCACCAGTGGCTGGTTTAC  
>HPV60\_Gamma\_9628566\_nt5906\_L1\_Tile\_rc|1  
AATTGGGGGACAGGATCCTTTTGCTGGAGCAGGATCACAAAGTTTAGCAATATCCCAGTG  
>HPV60\_Gamma\_9628566\_nt5911\_L1\_Tile\_rc|1  
AATTTAATTGGGGGACAGGATCCTTTTGCTGGAGCAGGATCACAAAGTTTAGCAATATCC  
>HPV60\_Gamma\_9628566\_nt5921\_L1\_Tile\_rc|1  
AGACTGTGTTAATTTAATTGGGGGACAGGATCCTTTTGCTGGAGCAGGATCACAAAGTTT  
>HPV60\_Gamma\_9628566\_nt5926\_L1\_Tile\_rc|1  
ATTATAGACTGTGTTAATTTAATTGGGGGACAGGATCCTTTTGCTGGAGCAGGATCACAA  
>HPV60\_Gamma\_9628566\_nt5941\_L1\_Tile\_rc|1  
ATTTACCGTCCTGAATTATAGACTGTGTTAATTTAATTGGGGGACAGGATCCTTTTGCT  
>HPV60\_Gamma\_9628566\_nt5946\_L1\_Tile\_rc|1  
CGCACATTTACCGTCCTGAATTATAGACTGTGTTAATTTAATTGGGGGACAGGATCCTT  
>HPV60\_Gamma\_9628566\_nt5961\_L1\_Tile\_rc|1  
TTCCAAAGCCTGTATCGCACATTTACCGTCCTGAATTATAGACTGTGTTAATTTAATTG  
>HPV60\_Gamma\_9628566\_nt5966\_L1\_Tile\_rc|1  
TGCATTTCCAAAGCCTGTATCGCACATTTACCGTCCTGAATTATAGACTGTGTTAATTT  
>HPV60\_Gamma\_9628566\_nt5976\_L1\_Tile\_rc|1  
TAATAAAATTTGCATTTCCAAAGCCTGTATCGCACATTTACCGTCCTGAATTATAGACT  
>HPV60\_Gamma\_9628566\_nt5991\_L1\_Tile\_rc|1  
TATCTTCTTGCAAGGTAATAAAATTTGCATTTCCAAAGCCTGTATCGCACATTTACCGT  
>HPV60\_Gamma\_9628566\_nt5996\_L1\_Tile\_rc|1  
TGATTTATCTTCTTGCAAGGTAATAAAATTTGCATTTCCAAAGCCTGTATCGCACATTT  
>HPV60\_Gamma\_9628566\_nt6011\_L1\_Tile\_rc|1  
ATCTAGAGGAACACCTGATTTATCTTCTTGCAAGGTAATAAAATTTGCATTTCCAAAGCC  
>HPV60\_Gamma\_9628566\_nt6016\_L1\_Tile\_rc|1  
GTAATATCTAGAGGAACACCTGATTTATCTTCTTGCAAGGTAATAAAATTTGCATTTCCA  
>HPV60\_Gamma\_9628566\_nt6021\_L1\_Tile\_rc|1  
CATTGGTAATATCTAGAGGAACACCTGATTTATCTTCTTGCAAGGTAATAAAATTTGCAT  
>HPV60\_Gamma\_9628566\_nt6026\_L1\_Tile\_rc|1  
AATTTTCATTGGTAATATCTAGAGGAACACCTGATTTATCTTCTTGCAAGGTAATAAAAT  
>HPV60\_Gamma\_9628566\_nt6031\_L1\_Tile\_rc|1  
TTACAAATTTTCATTGGTAATATCTAGAGGAACACCTGATTTATCTTCTTGCAAGGTAATA  
>HPV60\_Gamma\_9628566\_nt6036\_L1\_Tile\_rc|1  
GATATTTACAAATTTTCATTGGTAATATCTAGAGGAACACCTGATTTATCTTCTTGCAAGG  
>HPV60\_Gamma\_9628566\_nt6056\_L1\_Tile\_rc|1  
TGTCATTTTGTAGTAAATCAGGATATTTACAAATTTTCATTGGTAATATCTAGAGGAACACC  
>HPV60\_Gamma\_9628566\_nt6061\_L1\_Tile\_rc|1  
TCTTTTGTTCATTTTGTAGTAAATCAGGATATTTACAAATTTTCATTGGTAATATCTAGAGGA  
>HPV60\_Gamma\_9628566\_nt6066\_L1\_Tile\_rc|1  
AGATATCTTTTGTTCATTTTGTAGTAAATCAGGATATTTACAAATTTTCATTGGTAATATCTA  
>HPV60\_Gamma\_9628566\_nt6081\_L1\_Tile\_rc|1

ATACTGCATCTCCATAGATATCTTTTGTCAATTTTGTAGTAAATCAGGATATTTACAAATTT  
>HPV60\_Gamma\_9628566\_nt6136\_L1\_Tile\_rc|1  
CCTCCTCTTACAAAATAATGCCTGGAATAAATTTGTTCACGTTTACCAAAGAAAAATACT  
>HPV60\_Gamma\_9628566\_nt6146\_L1\_Tile\_rc|1  
TCCATCTATCCCTCCTCTTACAAAATAATGCCTGGAATAAATTTGTTCACGTTTACCAA  
>HPV60\_Gamma\_9628566\_nt6151\_L1\_Tile\_rc|1  
CTATCTCCATCTATCCCTCCTCTTACAAAATAATGCCTGGAATAAATTTGTTCACGTTTA  
>HPV60\_Gamma\_9628566\_nt6156\_L1\_Tile\_rc|1  
GCAAACCTATCTCCATCTATCCCTCCTCTTACAAAATAATGCCTGGAATAAATTTGTTCAC  
>HPV60\_Gamma\_9628566\_nt6166\_L1\_Tile\_rc|1  
CCAGAATCTGGCAAACCTATCTCCATCTATCCCTCCTCTTACAAAATAATGCCTGGAATAA  
>HPV60\_Gamma\_9628566\_nt6171\_L1\_Tile\_rc|1  
AATATCCAGAATCTGGCAAACCTATCTCCATCTATCCCTCCTCTTACAAAATAATGCCTGG  
>HPV60\_Gamma\_9628566\_nt6181\_L1\_Tile\_rc|1  
GGTGCTAAGTAATATCCAGAATCTGGCAAACCTATCTCCATCTATCCCTCCTCTTACAAAA  
>HPV60\_Gamma\_9628566\_nt6186\_L1\_Tile\_rc|1  
TTTGTGGTGCTAAGTAATATCCAGAATCTGGCAAACCTATCTCCATCTATCCCTCCTCTTA  
>HPV60\_Gamma\_9628566\_nt6191\_L1\_Tile\_rc|1  
ATCAGTTTGTGGTGCTAAGTAATATCCAGAATCTGGCAAACCTATCTCCATCTATCCCTCC  
>HPV60\_Gamma\_9628566\_nt6196\_L1\_Tile\_rc|1  
GGTTTATCAGTTTGTGGTGCTAAGTAATATCCAGAATCTGGCAAACCTATCTCCATCTATC  
>HPV60\_Gamma\_9628566\_nt6201\_L1\_Tile\_rc|1  
TTTGAGGTTTATCAGTTTGTGGTGCTAAGTAATATCCAGAATCTGGCAAACCTATCTCCAT  
>HPV60\_Gamma\_9628566\_nt6206\_L1\_Tile\_rc|1  
GTTATTTTGTAGGTTTATCAGTTTGTGGTGCTAAGTAATATCCAGAATCTGGCAAACCTATC  
>HPV60\_Gamma\_9628566\_nt6211\_L1\_Tile\_rc|1  
CCAAGGTTATTTTGTAGGTTTATCAGTTTGTGGTGCTAAGTAATATCCAGAATCTGGCAA  
>HPV60\_Gamma\_9628566\_nt6216\_L1\_Tile\_rc|1  
AACCACCAAGGTTATTTTGTAGGTTTATCAGTTTGTGGTGCTAAGTAATATCCAGAATCTG  
>HPV60\_Gamma\_9628566\_nt6221\_L1\_Tile\_rc|1  
ACTATAACCACCAAGGTTATTTTGTAGGTTTATCAGTTTGTGGTGCTAAGTAATATCCAGA  
>HPV60\_Gamma\_9628566\_nt6226\_L1\_Tile\_rc|1  
AAGTAACCTATAACCACCAAGGTTATTTTGTAGGTTTATCAGTTTGTGGTGCTAAGTAATAT  
>HPV60\_Gamma\_9628566\_nt6231\_L1\_Tile\_rc|1  
TAGGGAAGTAACCTATAACCACCAAGGTTATTTTGTAGGTTTATCAGTTTGTGGTGCTAAGT  
>HPV60\_Gamma\_9628566\_nt6241\_L1\_Tile\_rc|1  
CCACTTGGTGCTAGGGAAGTAACCTATAACCACCAAGGTTATTTTGTAGGTTTATCAGTTTGT  
>HPV60\_Gamma\_9628566\_nt6246\_L1\_Tile\_rc|1  
CAGAACCCTTGGTGCTAGGGAAGTAACCTATAACCACCAAGGTTATTTTGTAGGTTTATCAG  
>HPV60\_Gamma\_9628566\_nt6251\_L1\_Tile\_rc|1  
AGCTACAGAACCCTTGGTGCTAGGGAAGTAACCTATAACCACCAAGGTTATTTTGTAGGTTT  
>HPV60\_Gamma\_9628566\_nt6256\_L1\_Tile\_rc|1  
CTAGAAGCTACAGAACCCTTGGTGCTAGGGAAGTAACCTATAACCACCAAGGTTATTTTGA  
>HPV60\_Gamma\_9628566\_nt6261\_L1\_Tile\_rc|1  
TATCACTAGAAGCTACAGAACCCTTGGTGCTAGGGAAGTAACCTATAACCACCAAGGTTAT  
>HPV60\_Gamma\_9628566\_nt6271\_L1\_Tile\_rc|1  
AAAAGTTGATTATCACTAGAAGCTACAGAACCCTTGGTGCTAGGGAAGTAACCTATAACCA  
>HPV60\_Gamma\_9628566\_nt6276\_L1\_Tile\_rc|1  
TATTAAAAAGTTGATTATCACTAGAAGCTACAGAACCCTTGGTGCTAGGGAAGTAACCTAT  
>HPV60\_Gamma\_9628566\_nt6281\_L1\_Tile\_rc|1  
AGGTCTATTAAAAAGTTGATTATCACTAGAAGCTACAGAACCCTTGGTGCTAGGGAAGTA  
>HPV60\_Gamma\_9628566\_nt6286\_L1\_Tile\_rc|1  
CAATAAGGTCTATTAAAAAGTTGATTATCACTAGAAGCTACAGAACCCTTGGTGCTAGGG  
>HPV60\_Gamma\_9628566\_nt6306\_L1\_Tile\_rc|1  
CACCTTGGGCTCTGTGAAGCCAATAAGGTCTATTAAAAAGTTGATTATCACTAGAAGCTA



>HPV60\_Gamma\_9628566\_nt6376\_L1\_Tile\_rc|1  
AAATTAGTATTTTCGAGTATTATCTACTATAGTAATGAATAATTGGTTACCCCAACAAATA  
>HPV60\_Gamma\_9628566\_nt6381\_L1\_Tile\_rc|1  
TAGATAAATTAGTATTTTCGAGTATTATCTACTATAGTAATGAATAATTGGTTACCCCAAC  
>HPV60\_Gamma\_9628566\_nt6386\_L1\_Tile\_rc|1  
TGAAATAGATAAATTAGTATTTTCGAGTATTATCTACTATAGTAATGAATAATTGGTTACC  
>HPV60\_Gamma\_9628566\_nt6391\_L1\_Tile\_rc|1  
TAAACTGAAATAGATAAATTAGTATTTTCGAGTATTATCTACTATAGTAATGAATAATTGG  
>HPV60\_Gamma\_9628566\_nt6401\_L1\_Tile\_rc|1  
ATCTTGTTTTGTAACTGAAATAGATAAATTAGTATTTTCGAGTATTATCTACTATAGTAAT  
>HPV60\_Gamma\_9628566\_nt6406\_L1\_Tile\_rc|1  
GCAGCATCTTGTTGTAACTGAAATAGATAAATTAGTATTTTCGAGTATTATCTACTATA  
>HPV60\_Gamma\_9628566\_nt6411\_L1\_Tile\_rc|1  
CAATAGCAGCATCTTGTTGTAACTGAAATAGATAAATTAGTATTTTCGAGTATTATCTA  
>HPV60\_Gamma\_9628566\_nt6416\_L1\_Tile\_rc|1  
GTTATCAATAGCAGCATCTTGTTGTAACTGAAATAGATAAATTAGTATTTTCGAGTATT  
>HPV60\_Gamma\_9628566\_nt6421\_L1\_Tile\_rc|1  
TATCTGTTATCAATAGCAGCATCTTGTTGTAACTGAAATAGATAAATTAGTATTTTCGA  
>HPV60\_Gamma\_9628566\_nt6426\_L1\_Tile\_rc|1  
ATTTATATCTGTTATCAATAGCAGCATCTTGTTGTAACTGAAATAGATAAATTAGTAT  
>HPV60\_Gamma\_9628566\_nt6431\_L1\_Tile\_rc|1  
TTTATATTTATATCTGTTATCAATAGCAGCATCTTGTTGTAACTGAAATAGATAAATT  
>HPV60\_Gamma\_9628566\_nt6476\_L1\_Tile\_rc|1  
TTCATATTCTTCAGTATGGCGTAAATACTGTCTAAAATCTTCCTGTTTATATTTATATCT  
>HPV60\_Gamma\_9628566\_nt6481\_L1\_Tile\_rc|1  
TCTACTTCATATTCTTCAGTATGGCGTAAATACTGTCTAAAATCTTCCTGTTTATATTTA  
>HPV60\_Gamma\_9628566\_nt6486\_L1\_Tile\_rc|1  
TTAACTCTACTTCATATTCTTCAGTATGGCGTAAATACTGTCTAAAATCTTCCTGTTTAT  
>HPV60\_Gamma\_9628566\_nt6491\_L1\_Tile\_rc|1  
CAGAATTAACCTCTACTTCATATTCTTCAGTATGGCGTAAATACTGTCTAAAATCTTCCTG  
>HPV60\_Gamma\_9628566\_nt6496\_L1\_Tile\_rc|1  
AGTCTCAGAATTAACCTCTACTTCATATTCTTCAGTATGGCGTAAATACTGTCTAAAATCT  
>HPV60\_Gamma\_9628566\_nt6506\_L1\_Tile\_rc|1  
CACTTTACAGAGTCTCAGAATTAACCTCTACTTCATATTCTTCAGTATGGCGTAAATACTG  
>HPV60\_Gamma\_9628566\_nt6511\_L1\_Tile\_rc|1  
AAAGGCACCTTTACAGAGTCTCAGAATTAACCTCTACTTCATATTCTTCAGTATGGCGTAAA  
>HPV60\_Gamma\_9628566\_nt6516\_L1\_Tile\_rc|1  
GATTCAAAGGCACCTTTACAGAGTCTCAGAATTAACCTCTACTTCATATTCTTCAGTATGGC  
>HPV60\_Gamma\_9628566\_nt6521\_L1\_Tile\_rc|1  
ATCTGGATTCAAAGGCACCTTTACAGAGTCTCAGAATTAACCTCTACTTCATATTCTTCAGT  
>HPV60\_Gamma\_9628566\_nt6526\_L1\_Tile\_rc|1  
AGAACATCTGGATTCAAAGGCACCTTTACAGAGTCTCAGAATTAACCTCTACTTCATATTCT  
>HPV60\_Gamma\_9628566\_nt6531\_L1\_Tile\_rc|1  
GAGCTAGAACATCTGGATTCAAAGGCACCTTTACAGAGTCTCAGAATTAACCTCTACTTCAT  
>HPV60\_Gamma\_9628566\_nt6536\_L1\_Tile\_rc|1  
TAAATGAGCTAGAACATCTGGATTCAAAGGCACCTTTACAGAGTCTCAGAATTAACCTCTAC  
>HPV60\_Gamma\_9628566\_nt6541\_L1\_Tile\_rc|1  
ACATTTAAATGAGCTAGAACATCTGGATTCAAAGGCACCTTTACAGAGTCTCAGAATTAAC  
>HPV60\_Gamma\_9628566\_nt6631\_L1\_Tile\_rc|1  
GACATTATATCTGTAAGCATCTTCAATACCTTGTTGGTGGTGGAGGTACAAATGAAAGT  
>HPV60\_Gamma\_9628566\_nt6641\_L1\_Tile\_rc|1  
TGTTGCCTGAGACATTATATATCTGTAAGCATCTTCAATACCTTGTTGGTGGTGGAGGTAC  
>HPV60\_Gamma\_9628566\_nt6666\_L1\_Tile\_rc|1  
TATTAGGAACATCTGTTGGACACATTGTTGCCTGAGACATTATATATCTGTAAGCATCTT  
>HPV60\_Gamma\_9628566\_nt6671\_L1\_Tile\_rc|1

TTCAGTATTAGGAACATCTGTTGGACACATTGTTGCCTGAGACATTATATATCTGTAAGC  
>HPV60\_Gamma\_9628566\_nt6676\_L1\_Tile\_rc|1  
TCCCTTTTCAGTATTAGGAACATCTGTTGGACACATTGTTGCCTGAGACATTATATATCTG  
>HPV60\_Gamma\_9628566\_nt6691\_L1\_Tile\_rc|1  
TGTTTATAAGGGTCTTCCCTTTTCAGTATTAGGAACATCTGTTGGACACATTGTTGCCTGA  
>HPV60\_Gamma\_9628566\_nt6696\_L1\_Tile\_rc|1  
TATACTGTTTATAAGGGTCTTCCCTTTTCAGTATTAGGAACATCTGTTGGACACATTGTTG  
>HPV60\_Gamma\_9628566\_nt6726\_L1\_Tile\_rc|1  
AACGTTCTTGCAAATCTATTGTCCAAAATGTATACTGTTTATAAGGGTCTTCCCTTTTCAG  
>HPV60\_Gamma\_9628566\_nt6741\_L1\_Tile\_rc|1  
ATAATTTCGTTAGAAAAACGTTCTTGCAAATCTATTGTCCAAAATGTATACTGTTTATAAG  
>HPV60\_Gamma\_9628566\_nt6746\_L1\_Tile\_rc|1  
CTGGGATAATTCGTTAGAAAAACGTTCTTGCAAATCTATTGTCCAAAATGTATACTGTTT  
>HPV60\_Gamma\_9628566\_nt6751\_L1\_Tile\_rc|1  
GAAAACCTGGGATAATTCGTTAGAAAAACGTTCTTGCAAATCTATTGTCCAAAATGTATAC  
>HPV60\_Gamma\_9628566\_nt6756\_L1\_Tile\_rc|1  
CAAGAGAAAACCTGGGATAATTCGTTAGAAAAACGTTCTTGCAAATCTATTGTCCAAAATG  
>HPV60\_Gamma\_9628566\_nt6761\_L1\_Tile\_rc|1  
TTTTCCAAGAGAAAACCTGGGATAATTCGTTAGAAAAACGTTCTTGCAAATCTATTGTCCA  
>HPV60\_Gamma\_9628566\_nt6811\_L1\_Tile\_rc|1  
CTAGCAGACCGTTTTTCGTCCGTTAAGTAAGCCATACTGATATAAATATCTTTTTTCCAAGA  
>HPV60\_Gamma\_9628566\_nt6816\_L1\_Tile\_rc|1  
AACTACTAGCAGACCGTTTTTCGTCCGTTAAGTAAGCCATACTGATATAAATATCTTTTTTC  
>HPV60\_Gamma\_9628566\_nt6821\_L1\_Tile\_rc|1  
TACAAAACCTACTAGCAGACCGTTTTTCGTCCGTTAAGTAAGCCATACTGATATAAATATCT  
>HPV60\_Gamma\_9628566\_nt6826\_L1\_Tile\_rc|1  
TTCGTTACAAAACCTACTAGCAGACCGTTTTTCGTCCGTTAAGTAAGCCATACTGATATAAA  
>HPV60\_Gamma\_9628566\_nt6831\_L1\_Tile\_rc|1  
ATTTCTTCGTTACAAAACCTACTAGCAGACCGTTTTTCGTCCGTTAAGTAAGCCATACTGAT  
>HPV60\_Gamma\_9628566\_nt6836\_L1\_Tile\_rc|1  
TTTTGATTTCTTCGTTACAAAACCTACTAGCAGACCGTTTTTCGTCCGTTAAGTAAGCCATA  
>HPV60\_Gamma\_9628566\_nt6841\_L1\_Tile\_rc|1  
ACAGTTTTTTGATTTCTTCGTTACAAAACCTACTAGCAGACCGTTTTTCGTCCGTTAAGTAAG  
>HPV60\_Gamma\_9628566\_nt6846\_L1\_Tile\_rc|1  
GTTTCACAGTTTTTTGATTTCTTCGTTACAAAACCTACTAGCAGACCGTTTTTCGTCCGTTAA  
>HPV60\_Gamma\_9628566\_nt6851\_L1\_Tile\_rc|1  
TTTACGTTTTCACAGTTTTTTGATTTCTTCGTTACAAAACCTACTAGCAGACCGTTTTTCGTCC  
>HPV60\_Gamma\_9628566\_nt6861\_L1\_Tile\_rc|1  
ATTTAGTTCTTTTACGTTTTCACAGTTTTTTGATTTCTTCGTTACAAAACCTACTAGCAGACC  
>HPV60\_Gamma\_9628566\_nt6863\_L1\_Tile\_rc|1  
TTATTTAGTTCTTTTACGTTTTCACAGTTTTTTGATTTCTTCGTTACAAAACCTACTAGCAGA  
>HPV61\_Alpha\_9628574\_nt5880\_L1\_Tile\_rc|1  
CCTGCAGCCCATCAAGCTGCAAACCTACAATAGGGATGTCCTACAGTAAGCAGACGGGAAC  
>HPV61\_Alpha\_9628574\_nt5890\_L1\_Tile\_rc|1  
TTTTTCTTGCCCTGCAGCCCATCAAGCTGCAAACCTACAATAGGGATGTCCTACAGTAAGC  
>HPV61\_Alpha\_9628574\_nt5895\_L1\_Tile\_rc|1  
TAGTGTTTTCTTGCCCTGCAGCCCATCAAGCTGCAAACCTACAATAGGGATGTCCTACAG  
>HPV61\_Alpha\_9628574\_nt5900\_L1\_Tile\_rc|1  
GGGGATAGTGTTTTCTTGCCCTGCAGCCCATCAAGCTGCAAACCTACAATAGGGATGTCC  
>HPV61\_Alpha\_9628574\_nt5910\_L1\_Tile\_rc|1  
CAGACACCTTGGGGATAGTGTTTTCTTGCCCTGCAGCCCATCAAGCTGCAAACCTACAAT  
>HPV61\_Alpha\_9628574\_nt6195\_L1\_Tile\_rc|1  
GTTTGCAACCTACAATAAGTAGCTGGGTCTGCTTATAATCAACAGACACATTGTACGAC  
>HPV61\_Alpha\_9628574\_nt6285\_L1\_Tile\_rc|1  
TATTTGTAAATTCCAATGGAGGACAGTCAGTGGGCCGGGGCGCGGGGTTAGCACAAGCAG

>HPV61\_Alpha\_9628574\_nt6550\_L1\_Tile\_rc|1  
TTCGCACCCCTTAAGATAATAAGAGTCAGGCAGTGCCTCACCCATGACACCCCTGGCGATTG  
>HPV61\_Alpha\_9628574\_nt6585\_L1\_Tile\_rc|1  
GGGAATAAATACTAACTACCAGGGGGCCGCTTGTTCATTCGCACCCCTTAAGATAATAAGAGT  
>HPV61\_Alpha\_9628574\_nt6780\_L1\_Tile\_rc|1  
TGGCTTTTATATTCAGATACAGGGGGGGATGTAGCAGTACAAATGGTTAAATTAGTACTGC  
>HPV61\_Alpha\_9628574\_nt6785\_L1\_Tile\_rc|1  
GCTTGTGGCTTTATATTCAGATACAGGGGGGGATGTAGCAGTACAAATGGTTAAATTAGT  
>HPV61\_Alpha\_9628574\_nt6790\_L1\_Tile\_rc|1  
CTAAAGCTTGTGGCTTTATATTCAGATACAGGGGGGGATGTAGCAGTACAAATGGTTAAA  
>HPV61\_Alpha\_9628574\_nt6795\_L1\_Tile\_rc|1  
ATTCCTTAAAGCTTGTGGCTTTATATTCAGATACAGGGGGGGATGTAGCAGTACAAATGG  
>HPV61\_Alpha\_9628574\_nt6800\_L1\_Tile\_rc|1  
CAAATATTCCCTAAAGCTTGTGGCTTTATATTCAGATACAGGGGGGGATGTAGCAGTACA  
>HPV61\_Alpha\_9628574\_nt6805\_L1\_Tile\_rc|1  
TGGCGCAAATATTCCCTAAAGCTTGTGGCTTTATATTCAGATACAGGGGGGGATGTAGCA  
>HPV61\_Alpha\_9628574\_nt6810\_L1\_Tile\_rc|1  
CTGTATGGCGCAAATATTCCCTAAAGCTTGTGGCTTTATATTCAGATACAGGGGGGGATG  
>HPV61\_Alpha\_9628574\_nt6820\_L1\_Tile\_rc|1  
TCAAACCTCCTGTATGGCGCAAATATTCCCTAAAGCTTGTGGCTTTATATTCAGATACA  
>HPV61\_Alpha\_9628574\_nt6985\_L1\_Tile\_rc|1  
ATAGCTCTGGACTGCAAAAACCTATATGTGTCTTCTAAACTGGTAGAGGGTGGTGGTACC  
>HPVcand62\_Alpha\_39932599\_nt6163\_L1\_Tile\_rc|1  
CCACAGAGATATTGTCCCGACTGTCATCATTAGCAGCAGCCAACAAAGAGGTATTTTCTG  
>HPVcand62\_Alpha\_39932599\_nt6168\_L1\_Tile\_rc|1  
ATAATCCACAGAGATATTGTCCCGACTGTCATCATTAGCAGCAGCCAACAAAGAGGTATT  
>HPVcand62\_Alpha\_39932599\_nt6238\_L1\_Tile\_rc|1  
ATAAGGTACCTTTGGTCCAGTGCTCTCCTATAGGGGGCTTACACCCCACAATTAACAACCT  
>HPVcand62\_Alpha\_39932599\_nt6243\_L1\_Tile\_rc|1  
GGGGCATAAGGTACCTTTGGTCCAGTGCTCTCCTATAGGGGGCTTACACCCCACAATTAA  
>HPVcand62\_Alpha\_39932599\_nt6248\_L1\_Tile\_rc|1  
GCATTGGGGCATAAGGTACCTTTGGTCCAGTGCTCTCCTATAGGGGGCTTACACCCCACA  
>HPVcand62\_Alpha\_39932599\_nt6253\_L1\_Tile\_rc|1  
GGGCAGCATTTGGGGCATAAGGTACCTTTGGTCCAGTGCTCTCCTATAGGGGGCTTACACC  
>HPVcand62\_Alpha\_39932599\_nt6588\_L1\_Tile\_rc|1  
GTAACCTGCCCGCATTTGTCTGTCACTGCCTGGGGTACCTTTTCATATACAGGTCAGTGGG  
>HPVcand62\_Alpha\_39932599\_nt6593\_L1\_Tile\_rc|1  
TAAATGTAACTGCCCAGCATTTGTCTGTCACTGCCTGGGGTACCTTTTCATATACAGGTCA  
>HPVcand62\_Alpha\_39932599\_nt6603\_L1\_Tile\_rc|1  
AGTGGGGGCATAAATGTAACTGCCCAGCATTTGTCTGTCACTGCCTGGGGTACCTTTTCAT  
>HPVcand62\_Alpha\_39932599\_nt7073\_L1\_Tile\_rc|1  
AGATCCACAGTCCAAAATGTCATTTGCGCATACGGGTCCACCTTGGGGGACGGGGAAGCA  
>HPVcand62\_Alpha\_39932599\_nt7230\_L1\_Tile\_rc|1  
TTACTTCCTGCGCTTTCGTTTAGCAGAGGTAGGGGACTGCTTAGTAGGTGCAGAACGCTT  
>HPV63\_Mu\_9626605\_nt5372\_L1\_Tile\_rc|1  
CTTGGTGATCGGTTGGGTAGGAAGGTAAACTTATTCTGGGCAGGAAGCCAAACAGCCAT  
>HPV63\_Mu\_9626605\_nt5377\_L1\_Tile\_rc|1  
AGAATCTTGGTGATCGGTTGGGTAGGAAGGTAAACTTATTCTGGGCAGGAAGCCAAACA  
>HPV63\_Mu\_9626605\_nt5392\_L1\_Tile\_rc|1  
TAATCATCGCTGCTTAGAATCTTGGTGATCGGTTGGGTAGGAAGGTAAACTTATTCTGG  
>HPV63\_Mu\_9626605\_nt5397\_L1\_Tile\_rc|1  
ACACATAATCATCGCTGCTTAGAATCTTGGTGATCGGTTGGGTAGGAAGGTAAACTTAT  
>HPV63\_Mu\_9626605\_nt5407\_L1\_Tile\_rc|1  
TTGGTGCGAGACACATAATCATCGCTGCTTAGAATCTTGGTGATCGGTTGGGTAGGAAGG  
>HPV63\_Mu\_9626605\_nt5412\_L1\_Tile\_rc|1

AGATGTTGGTGCGAGACACATAATCATCGCTGCTTAGAATCTTGGTGATCGGTTGGGTAG  
>HPV63\_Mu\_9626605\_nt5417\_L1\_Tile\_rc|1  
ATAGAAGATGTTGGTGCGAGACACATAATCATCGCTGCTTAGAATCTTGGTGATCGGTTG  
>HPV63\_Mu\_9626605\_nt5422\_L1\_Tile\_rc|2  
GCGTGATAGAAGATGTTGGTGCGAGACACATAATCATCGCTGCTTAGAATCTTGGTGATC  
>HPV63\_Mu\_9626605\_nt5427\_L1\_Tile\_rc|1  
TGGTAGCGTGATAGAAGATGTTGGTGCGAGACACATAATCATCGCTGCTTAGAATCTTGG  
>HPV63\_Mu\_9626605\_nt5442\_L1\_Tile\_rc|2  
TGAGCAGTCGATCACTGGTAGCGTGATAGAAGATGTTGGTGCGAGACACATAATCATCGC  
>HPV63\_Mu\_9626605\_nt5447\_L1\_Tile\_rc|1  
CACAATGAGCAGTCGATCACTGGTAGCGTGATAGAAGATGTTGGTGCGAGACACATAATC  
>HPV63\_Mu\_9626605\_nt5462\_L1\_Tile\_rc|2  
ATAGAGCGGGTGTCACCAATGAGCAGTCGATCACTGGTAGCGTGATAGAAGATGTTGGT  
>HPV63\_Mu\_9626605\_nt5467\_L1\_Tile\_rc|1  
ACCTCATAGAGCGGGTGTCACCAATGAGCAGTCGATCACTGGTAGCGTGATAGAAGATG  
>HPV63\_Mu\_9626605\_nt5472\_L1\_Tile\_rc|1  
GGGTAACTTCATAGAGCGGGTGTCACCAATGAGCAGTCGATCACTGGTAGCGTGATAGA  
>HPV63\_Mu\_9626605\_nt5487\_L1\_Tile\_rc|1  
TGTTATCATTTGCACGGGTAACTTCATAGAGCGGGTGTCACCAATGAGCAGTCGATCAC  
>HPV63\_Mu\_9626605\_nt5492\_L1\_Tile\_rc|1  
CATAGTGTTATCATTTGCACGGGTAACTTCATAGAGCGGGTGTCACCAATGAGCAGTCG  
>HPV63\_Mu\_9626605\_nt5497\_L1\_Tile\_rc|1  
ACAGTCATAGTGTTATCATTTGCACGGGTAACTTCATAGAGCGGGTGTCACCAATGAGC  
>HPV63\_Mu\_9626605\_nt5512\_L1\_Tile\_rc|1  
GGAGAACTTTAGGCACAGTCATAGTGTTATCATTTGCACGGGTAACTTCATAGAGCGGG  
>HPV63\_Mu\_9626605\_nt5517\_L1\_Tile\_rc|1  
GATTTGGAGAACTTTAGGCACAGTCATAGTGTTATCATTTGCACGGGTAACTTCATAGA  
>HPV63\_Mu\_9626605\_nt5522\_L1\_Tile\_rc|2  
ATACTGATTTGGAGAACTTTAGGCACAGTCATAGTGTTATCATTTGCACGGGTAACTTC  
>HPV63\_Mu\_9626605\_nt5532\_L1\_Tile\_rc|1  
GAAAGACTCTATACTGATTTGGAGAACTTTAGGCACAGTCATAGTGTTATCATTTGCAC  
>HPV63\_Mu\_9626605\_nt5537\_L1\_Tile\_rc|1  
AACACGAAAGACTCTATACTGATTTGGAGAACTTTAGGCACAGTCATAGTGTTATCATTT  
>HPV63\_Mu\_9626605\_nt5542\_L1\_Tile\_rc|2  
AATCTAACACGAAAGACTCTATACTGATTTGGAGAACTTTAGGCACAGTCATAGTGTTA  
>HPV63\_Mu\_9626605\_nt5547\_L1\_Tile\_rc|1  
CTGGAAATCTAACACGAAAGACTCTATACTGATTTGGAGAACTTTAGGCACAGTCATAG  
>HPV63\_Mu\_9626605\_nt5577\_L1\_Tile\_rc|1  
CCTTATCTCCAAAGGCAAATCGGTTAGGATCTGGAAATCTAACACGAAAGACTCTATACT  
>HPV63\_Mu\_9626605\_nt5582\_L1\_Tile\_rc|2  
AATATCCTTATCTCCAAAGGCAAATCGGTTAGGATCTGGAAATCTAACACGAAAGACTCT  
>HPV63\_Mu\_9626605\_nt5622\_L1\_Tile\_rc|2  
CTCTAAGACCCCAAAGTAGTCTCTCAGTTTCTGGGTCAAAAATATCCTTATCTCCAAAGG  
>HPV63\_Mu\_9626605\_nt5627\_L1\_Tile\_rc|1  
TATGCCTCTAAGACCCCAAAGTAGTCTCTCAGTTTCTGGGTCAAAAATATCCTTATCTCC  
>HPV63\_Mu\_9626605\_nt5632\_L1\_Tile\_rc|1  
ATTTCTATGCCTCTAAGACCCCAAAGTAGTCTCTCAGTTTCTGGGTCAAAAATATCCTTA  
>HPV63\_Mu\_9626605\_nt5637\_L1\_Tile\_rc|1  
TACCGATTCTATGCCTCTAAGACCCCAAAGTAGTCTCTCAGTTTCTGGGTCAAAAATAT  
>HPV63\_Mu\_9626605\_nt5712\_L1\_Tile\_rc|1  
TGCTAGGATTTTCAGCATCATCAAACCTATTTAATAATGGATTGCCTGAAATACCCACAC  
>HPV63\_Mu\_9626605\_nt5722\_L1\_Tile\_rc|2  
TTATTATATCTGCTAGGATTTTCAGCATCATCAAACCTATTTAATAATGGATTGCCTGAA  
>HPV63\_Mu\_9626605\_nt5727\_L1\_Tile\_rc|1  
GTGTATTATTATATCTGCTAGGATTTTCAGCATCATCAAACCTATTTAATAATGGATTGC

>HPV63\_Mu\_9626605\_nt5732\_L1\_Tile\_rc|1  
TGCATGTGTATTATTATATCTGCTAGGATTTTCAGCATCATCAAACCTATTTAATAATGG  
>HPV63\_Mu\_9626605\_nt5742\_L1\_Tile\_rc|2  
TATCACCAGTTGCATGTGTATTATTATATCTGCTAGGATTTTCAGCATCATCAAACCTAT  
>HPV63\_Mu\_9626605\_nt5747\_L1\_Tile\_rc|1  
CCTATTATCACCAGTTGCATGTGTATTATTATATCTGCTAGGATTTTCAGCATCATCAA  
>HPV63\_Mu\_9626605\_nt5757\_L1\_Tile\_rc|1  
CAACATTTTGCCTATTATCACCAGTTGCATGTGTATTATTATATCTGCTAGGATTTTCAG  
>HPV63\_Mu\_9626605\_nt5762\_L1\_Tile\_rc|2  
AAAAGCAACATTTTGCCTATTATCACCAGTTGCATGTGTATTATTATATCTGCTAGGATT  
>HPV63\_Mu\_9626605\_nt5792\_L1\_Tile\_rc|1  
AATTAGAAAACATTTGGGTTTGTTCATCAAAGCAACATTTTGCCTATTATCACCAGT  
>HPV63\_Mu\_9626605\_nt5852\_L1\_Tile\_rc|1  
CTGTGTTCTGCACAGCGTCGAGCTATTGACCAGTGTTCCCCAGTGGCTGGTGTACAGCC  
>HPV63\_Mu\_9626605\_nt5857\_L1\_Tile\_rc|1  
TGAAACTGTGTTCCCTGCACAGCGTCGAGCTATTGACCAGTGTTCCCCAGTGGCTGGTGT  
>HPV63\_Mu\_9626605\_nt5872\_L1\_Tile\_rc|1  
GGACAATCTCCAAGCTGAAACTGTGTTCCCTGCACAGCGTCGAGCTATTGACCAGTGTTCC  
>HPV63\_Mu\_9626605\_nt5877\_L1\_Tile\_rc|1  
TAGGAGGACAATCTCCAAGCTGAAACTGTGTTCCCTGCACAGCGTCGAGCTATTGACCAGT  
>HPV63\_Mu\_9626605\_nt5967\_L1\_Tile\_rc|1  
CTTTGTTTGCCTTGCAAAGAACCAGTCCATAGCACCTAGACCTATGTCAAACATATCAC  
>HPV63\_Mu\_9626605\_nt5972\_L1\_Tile\_rc|1  
ATCTGCTTTGTTTGCCTTGCAAAGAACCAGTCCATAGCACCTAGACCTATGTCAAACAT  
>HPV63\_Mu\_9626605\_nt5977\_L1\_Tile\_rc|1  
GGAGCATCTGCTTTGTTTGCCTTGCAAAGAACCAGTCCATAGCACCTAGACCTATGTCA  
>HPV63\_Mu\_9626605\_nt5982\_L1\_Tile\_rc|2  
CCAAAGGAGCATCTGCTTTGTTTGCCTTGCAAAGAACCAGTCCATAGCACCTAGACCTA  
>HPV63\_Mu\_9626605\_nt5992\_L1\_Tile\_rc|1  
CCTGCAATATCCAAAGGAGCATCTGCTTTGTTTGCCTTGCAAAGAACCAGTCCATAGCA  
>HPV63\_Mu\_9626605\_nt5997\_L1\_Tile\_rc|1  
CAGTGCTTGCAATATCCAAAGGAGCATCTGCTTTGTTTGCCTTGCAAAGAACCAGTCCA  
>HPV63\_Mu\_9626605\_nt6002\_L1\_Tile\_rc|2  
GCAGACAGTGCCTGCAATATCCAAAGGAGCATCTGCTTTGTTTGCCTTGCAAAGAACCAG  
>HPV63\_Mu\_9626605\_nt6072\_L1\_Tile\_rc|1  
CTCTGCGAGCAAAGAAAAACAGAGAATTACCATGTACTTCCTGTCCCATTTTAATATAAT  
>HPV63\_Mu\_9626605\_nt6077\_L1\_Tile\_rc|1  
TTGTTCTCTGCGAGCAAAGAAAAACAGAGAATTACCATGTACTTCCTGTCCCATTTTAAT  
>HPV63\_Mu\_9626605\_nt6082\_L1\_Tile\_rc|2  
TACATTTGTTCTCTGCGAGCAAAGAAAAACAGAGAATTACCATGTACTTCCTGTCCCATT  
>HPV63\_Mu\_9626605\_nt6087\_L1\_Tile\_rc|1  
TTAAATACATTTGTTCTCTGCGAGCAAAGAAAAACAGAGAATTACCATGTACTTCCTGTC  
>HPV63\_Mu\_9626605\_nt6112\_L1\_Tile\_rc|1  
ATTCCAGCATGTGTAAATACATGCCTTAAATACATTTGTTCTCTGCGAGCAAAGAAAAAC  
>HPV63\_Mu\_9626605\_nt6117\_L1\_Tile\_rc|1  
TAACAATTCCAGCATGTGTAAATACATGCCTTAAATACATTTGTTCTCTGCGAGCAAAGA  
>HPV63\_Mu\_9626605\_nt6122\_L1\_Tile\_rc|2  
TTCATAACAATTCCAGCATGTGTAAATACATGCCTTAAATACATTTGTTCTCTGCGAGC  
>HPV63\_Mu\_9626605\_nt6127\_L1\_Tile\_rc|1  
TCTTTTTCATAACAATTCCAGCATGTGTAAATACATGCCTTAAATACATTTGTTCTCTG  
>HPV63\_Mu\_9626605\_nt6132\_L1\_Tile\_rc|1  
CTTTCTCTTTTTCATAACAATTCCAGCATGTGTAAATACATGCCTTAAATACATTTGTT  
>HPV63\_Mu\_9626605\_nt6137\_L1\_Tile\_rc|1  
AGGGACTTTCTCTTTTTCATAACAATTCCAGCATGTGTAAATACATGCCTTAAATACAT  
>HPV63\_Mu\_9626605\_nt6142\_L1\_Tile\_rc|2

CTGGTAGGGACTTTCTCTTTTTCTACTAACAATTCCAGCATGTGTAAATACATGCCTTAAA  
>HPV63\_Mu\_9626605\_nt6147\_L1\_Tile\_rc|1  
ATGCACTGGTAGGGACTTTCTCTTTTTCTACTAACAATTCCAGCATGTGTAAATACATGCC  
>HPV63\_Mu\_9626605\_nt6152\_L1\_Tile\_rc|1  
AATATATGCACTGGTAGGGACTTTCTCTTTTTCTACTAACAATTCCAGCATGTGTAAATAC  
>HPV63\_Mu\_9626605\_nt6157\_L1\_Tile\_rc|1  
GCAGCAATATATGCACTGGTAGGGACTTTCTCTTTTTCTACTAACAATTCCAGCATGTGTAA  
>HPV63\_Mu\_9626605\_nt6167\_L1\_Tile\_rc|1  
CTCGGCTTTAGCAGCAATATATGCACTGGTAGGGACTTTCTCTTTTTCTACTAACAATTCC  
>HPV63\_Mu\_9626605\_nt6172\_L1\_Tile\_rc|1  
GGTTGCTCGGCTTTAGCAGCAATATATGCACTGGTAGGGACTTTCTCTTTTTCTACTAACA  
>HPV63\_Mu\_9626605\_nt6182\_L1\_Tile\_rc|2  
AGTATTTTGGGGTTGCTCGGCTTTAGCAGCAATATATGCACTGGTAGGGACTTTCTCTTT  
>HPV63\_Mu\_9626605\_nt6187\_L1\_Tile\_rc|1  
GCAATAGTATTTTGGGGTTGCTCGGCTTTAGCAGCAATATATGCACTGGTAGGGACTTTC  
>HPV63\_Mu\_9626605\_nt6192\_L1\_Tile\_rc|1  
CTGTAGCAATAGTATTTTGGGGTTGCTCGGCTTTAGCAGCAATATATGCACTGGTAGGGA  
>HPV63\_Mu\_9626605\_nt6202\_L1\_Tile\_rc|2  
AAATAATTATCTGTAGCAATAGTATTTTGGGGTTGCTCGGCTTTAGCAGCAATATATGCA  
>HPV63\_Mu\_9626605\_nt6212\_L1\_Tile\_rc|1  
GGGAGCTACAAAATAATTATCTGTAGCAATAGTATTTTGGGGTTGCTCGGCTTTAGCAGC  
>HPV63\_Mu\_9626605\_nt6217\_L1\_Tile\_rc|1  
CCACTGGGAGCTACAAAATAATTATCTGTAGCAATAGTATTTTGGGGTTGCTCGGCTTTA  
>HPV63\_Mu\_9626605\_nt6222\_L1\_Tile\_rc|2  
AAGATCCACTGGGAGCTACAAAATAATTATCTGTAGCAATAGTATTTTGGGGTTGCTCGG  
>HPV63\_Mu\_9626605\_nt6227\_L1\_Tile\_rc|1  
CACTAAAGATCCACTGGGAGCTACAAAATAATTATCTGTAGCAATAGTATTTTGGGGTTG  
>HPV63\_Mu\_9626605\_nt6237\_L1\_Tile\_rc|1  
CATCAGAGGACACTAAAGATCCACTGGGAGCTACAAAATAATTATCTGTAGCAATAGTAT  
>HPV63\_Mu\_9626605\_nt6242\_L1\_Tile\_rc|2  
TTGCACATCAGAGGACACTAAAGATCCACTGGGAGCTACAAAATAATTATCTGTAGCAAT  
>HPV63\_Mu\_9626605\_nt6247\_L1\_Tile\_rc|1  
AAAATTTGCACATCAGAGGACACTAAAGATCCACTGGGAGCTACAAAATAATTATCTGTA  
>HPV63\_Mu\_9626605\_nt6252\_L1\_Tile\_rc|1  
TATTAAAAATTTGCACATCAGAGGACACTAAAGATCCACTGGGAGCTACAAAATAATTAT  
>HPV63\_Mu\_9626605\_nt6257\_L1\_Tile\_rc|1  
GGGCCTATTAAAAATTTGCACATCAGAGGACACTAAAGATCCACTGGGAGCTACAAAATA  
>HPV63\_Mu\_9626605\_nt6282\_L1\_Tile\_rc|2  
GTCCTTGAGAACGTTGTAACCAATAGGGCTATTAAAAATTTGCACATCAGAGGACACTA  
>HPV63\_Mu\_9626605\_nt6342\_L1\_Tile\_rc|2  
CTCTGGTATTATCAGCTACAGTTACAAATAACTCATTTCTCCAACAGATACCATTGTTCT  
>HPV63\_Mu\_9626605\_nt6352\_L1\_Tile\_rc|1  
ATCGTGGTTCCTCTGGTATTATCAGCTACAGTTACAAATAACTCATTTCTCCAACAGATA  
>HPV63\_Mu\_9626605\_nt6362\_L1\_Tile\_rc|2  
ATTTATATTCATCGTGGTTCCTCTGGTATTATCAGCTACAGTTACAAATAACTCATTTCT  
>HPV63\_Mu\_9626605\_nt6367\_L1\_Tile\_rc|1  
AGAACATTTATATTCATCGTGGTTCCTCTGGTATTATCAGCTACAGTTACAAATAACTCA  
>HPV63\_Mu\_9626605\_nt6372\_L1\_Tile\_rc|1  
TGTTAAGAACATTTATATTCATCGTGGTTCCTCTGGTATTATCAGCTACAGTTACAAATA  
>HPV63\_Mu\_9626605\_nt6377\_L1\_Tile\_rc|1  
TGCTTTGTTAAGAACATTTATATTCATCGTGGTTCCTCTGGTATTATCAGCTACAGTTAC  
>HPV63\_Mu\_9626605\_nt6387\_L1\_Tile\_rc|1  
TCTCAGGGGTTGCTTTGTTAAGAACATTTATATTCATCGTGGTTCCTCTGGTATTATCAG  
>HPV63\_Mu\_9626605\_nt6392\_L1\_Tile\_rc|1  
ATAAGTCTCAGGGGTTGCTTTGTTAAGAACATTTATATTCATCGTGGTTCCTCTGGTATT

>HPV63\_Mu\_9626605\_nt6402\_L1\_Tile\_rc|2  
CTGCGCTATCATAAGTCTCAGGGGTTGCTTTGTTAAGAACATTTATATTCATCGTGGTTC  
>HPV63\_Mu\_9626605\_nt6407\_L1\_Tile\_rc|1  
ATAATCTGCGCTATCATAAGTCTCAGGGGTTGCTTTGTTAAGAACATTTATATTCATCGT  
>HPV63\_Mu\_9626605\_nt6412\_L1\_Tile\_rc|1  
TCATTATAATCTGCGCTATCATAAGTCTCAGGGGTTGCTTTGTTAAGAACATTTATATTC  
>HPV63\_Mu\_9626605\_nt6422\_L1\_Tile\_rc|2  
GCGAGTATACTCATTATAATCTGCGCTATCATAAGTCTCAGGGGTTGCTTTGTTAAGAAC  
>HPV63\_Mu\_9626605\_nt6427\_L1\_Tile\_rc|1  
ACATGGCGAGTATACTCATTATAATCTGCGCTATCATAAGTCTCAGGGGTTGCTTTGTTA  
>HPV63\_Mu\_9626605\_nt6437\_L1\_Tile\_rc|1  
ATATTCCTCCACATGGCGAGTATACTCATTATAATCTGCGCTATCATAAGTCTCAGGGGT  
>HPV63\_Mu\_9626605\_nt6447\_L1\_Tile\_rc|1  
AGGATAACTCATATTCCTCCACATGGCGAGTATACTCATTATAATCTGCGCTATCATAAG  
>HPV63\_Mu\_9626605\_nt6452\_L1\_Tile\_rc|1  
TATAAAGGATAACTCATATTCCTCCACATGGCGAGTATACTCATTATAATCTGCGCTATC  
>HPV63\_Mu\_9626605\_nt6457\_L1\_Tile\_rc|1  
TGAAGTATAAAGGATAACTCATATTCCTCCACATGGCGAGTATACTCATTATAATCTGCG  
>HPV63\_Mu\_9626605\_nt6462\_L1\_Tile\_rc|2  
AAAGCTGAACTATAAAGGATAACTCATATTCCTCCACATGGCGAGTATACTCATTATAAT  
>HPV63\_Mu\_9626605\_nt6492\_L1\_Tile\_rc|1  
CTAAATTTTCAGGTGTTAGTTTTACCTTACAAAGCTGAACTATAAAGGATAACTCATATT  
>HPV63\_Mu\_9626605\_nt6497\_L1\_Tile\_rc|1  
AAATGCTAAATTTTCAGGTGTTAGTTTTACCTTACAAAGCTGAACTATAAAGGATAACTC  
>HPV63\_Mu\_9626605\_nt6502\_L1\_Tile\_rc|2  
TGCAAAAATGCTAAATTTTCAGGTGTTAGTTTTACCTTACAAAGCTGAACTATAAAGGAT  
>HPV63\_Mu\_9626605\_nt6537\_L1\_Tile\_rc|1  
ACTGCCAGGAATCGATAATTGTTGGATCCATATTATGCAAAAATGCTAAATTTTCAGGTG  
>HPV63\_Mu\_9626605\_nt6542\_L1\_Tile\_rc|2  
TGTTAACTGCCAGGAATCGATAATTGTTGGATCCATATTATGCAAAAATGCTAAATTTTC  
>HPV63\_Mu\_9626605\_nt6547\_L1\_Tile\_rc|1  
GAAACTGTAACTGCCAGGAATCGATAATTGTTGGATCCATATTATGCAAAAATGCTAAA  
>HPV63\_Mu\_9626605\_nt6552\_L1\_Tile\_rc|1  
GTTGAGAACTGTAACTGCCAGGAATCGATAATTGTTGGATCCATATTATGCAAAAATG  
>HPV63\_Mu\_9626605\_nt6562\_L1\_Tile\_rc|2  
TTTGCAGGAGGTTGAGAACTGTAACTGCCAGGAATCGATAATTGTTGGATCCATATTA  
>HPV63\_Mu\_9626605\_nt6572\_L1\_Tile\_rc|1  
CTCTATAGCATTTGCAGGAGGTTGAGAACTGTAACTGCCAGGAATCGATAATTGTTGG  
>HPV63\_Mu\_9626605\_nt6582\_L1\_Tile\_rc|2  
TATACTTGTCCTCTATAGCATTTGCAGGAGGTTGAGAACTGTAACTGCCAGGAATCGA  
>HPV63\_Mu\_9626605\_nt6587\_L1\_Tile\_rc|1  
AAATCTATACTTGTCTCTATAGCATTTGCAGGAGGTTGAGAACTGTAACTGCCAGGA  
>HPV63\_Mu\_9626605\_nt6592\_L1\_Tile\_rc|1  
TCAATAAATCTATACTTGTCTCTATAGCATTTGCAGGAGGTTGAGAACTGTAACTGC  
>HPV63\_Mu\_9626605\_nt6597\_L1\_Tile\_rc|1  
ATGATTCAATAAATCTATACTTGTCTCTATAGCATTTGCAGGAGGTTGAGAACTGTAA  
>HPV63\_Mu\_9626605\_nt6607\_L1\_Tile\_rc|1  
TTTGTTGCTAATGATTCAATAAATCTATACTTGTCTCTATAGCATTTGCAGGAGGTTGA  
>HPV63\_Mu\_9626605\_nt6612\_L1\_Tile\_rc|1  
GACATTTTGTGCTAATGATTCAATAAATCTATACTTGTCTCTATAGCATTTGCAGGAG  
>HPV63\_Mu\_9626605\_nt6617\_L1\_Tile\_rc|1  
ATCAGGACATTTTGTGCTAATGATTCAATAAATCTATACTTGTCTCTATAGCATTTGC  
>HPV63\_Mu\_9626605\_nt6622\_L1\_Tile\_rc|2  
ACGTTATCAGGACATTTTGTGCTAATGATTCAATAAATCTATACTTGTCTCTATAGCA  
>HPV63\_Mu\_9626605\_nt6632\_L1\_Tile\_rc|1

GGGTGGGGGCACGTTATCAGGACATTTTGTGCTAATGATTCAATAAATCTATACTTGTC  
>HPV63\_Mu\_9626605\_nt6637\_L1\_Tile\_rc|1  
GGAGTGGGTGGGGGCACGTTATCAGGACATTTTGTGCTAATGATTCAATAAATCTATAC  
>HPV63\_Mu\_9626605\_nt6657\_L1\_Tile\_rc|1  
AATCTTTGTAAGGATCAGTAGGAGTGGGTGGGGGCACGTTATCAGGACATTTTGTGCTA  
>HPV63\_Mu\_9626605\_nt6662\_L1\_Tile\_rc|2  
ACGTAAATCTTTGTAAGGATCAGTAGGAGTGGGTGGGGGCACGTTATCAGGACATTTTGT  
>HPV63\_Mu\_9626605\_nt6672\_L1\_Tile\_rc|1  
CATCCCCAAAACGTAAATCTTTGTAAGGATCAGTAGGAGTGGGTGGGGGCACGTTATCAG  
>HPV63\_Mu\_9626605\_nt6677\_L1\_Tile\_rc|1  
GTCTACATCCCCAAAACGTAAATCTTTGTAAGGATCAGTAGGAGTGGGTGGGGGCACGTT  
>HPV63\_Mu\_9626605\_nt6682\_L1\_Tile\_rc|2  
CTGAGGTCTACATCCCCAAAACGTAAATCTTTGTAAGGATCAGTAGGAGTGGGTGGGGGC  
>HPV63\_Mu\_9626605\_nt6687\_L1\_Tile\_rc|1  
GCTCACTGAGGTCTACATCCCCAAAACGTAAATCTTTGTAAGGATCAGTAGGAGTGGGTG  
>HPV63\_Mu\_9626605\_nt6692\_L1\_Tile\_rc|1  
CATTCGCTCACTGAGGTCTACATCCCCAAAACGTAAATCTTTGTAAGGATCAGTAGGAGT  
>HPV63\_Mu\_9626605\_nt6697\_L1\_Tile\_rc|1  
TCCGACATTCGCTCACTGAGGTCTACATCCCCAAAACGTAAATCTTTGTAAGGATCAGTA  
>HPV63\_Mu\_9626605\_nt6702\_L1\_Tile\_rc|2  
GCTGCTCCGACATTCGCTCACTGAGGTCTACATCCCCAAAACGTAAATCTTTGTAAGGAT  
>HPV63\_Mu\_9626605\_nt6707\_L1\_Tile\_rc|1  
ATCAAGCTGCTCCGACATTCGCTCACTGAGGTCTACATCCCCAAAACGTAAATCTTTGTA  
>HPV63\_Mu\_9626605\_nt6712\_L1\_Tile\_rc|1  
AATTGATCAAGCTGCTCCGACATTCGCTCACTGAGGTCTACATCCCCAAAACGTAAATCT  
>HPV63\_Mu\_9626605\_nt6717\_L1\_Tile\_rc|1  
AAGGAAATTGATCAAGCTGCTCCGACATTCGCTCACTGAGGTCTACATCCCCAAAACGTA  
>HPV63\_Mu\_9626605\_nt6722\_L1\_Tile\_rc|2  
GCCTAAAGGAAATTGATCAAGCTGCTCCGACATTCGCTCACTGAGGTCTACATCCCCAAA  
>HPV63\_Mu\_9626605\_nt6732\_L1\_Tile\_rc|1  
AAAATTTGCGGCCTAAAGGAAATTGATCAAGCTGCTCCGACATTCGCTCACTGAGGTCTA  
>HPV63\_Mu\_9626605\_nt6737\_L1\_Tile\_rc|1  
ATACAAAAATTGCGGCCTAAAGGAAATTGATCAAGCTGCTCCGACATTCGCTCACTGAG  
>HPV63\_Mu\_9626605\_nt6742\_L1\_Tile\_rc|2  
CTTTGATACAAAAATTTGCGGCCTAAAGGAAATTGATCAAGCTGCTCCGACATTCGCTCA  
>HPV63\_Mu\_9626605\_nt6782\_L1\_Tile\_rc|2  
GAAATTCACAGTTTTTTGGAACAGAACGCTGTGCAAGACCACTTTGATACAAAAATTTGCG  
>HPV63\_Mu\_9626605\_nt6787\_L1\_Tile\_rc|1  
TTTCTGAAATTCACAGTTTTTTGGAACAGAACGCTGTGCAAGACCACTTTGATACAAAAAT  
>HPV63\_Mu\_9626605\_nt6792\_L1\_Tile\_rc|1  
TACGTTTTCTGAAATTCACAGTTTTTTGGAACAGAACGCTGTGCAAGACCACTTTGATACA  
>HPV63\_Mu\_9626605\_nt6797\_L1\_Tile\_rc|1  
GGATCTACGTTTTCTGAAATTCACAGTTTTTTGGAACAGAACGCTGTGCAAGACCACTTTG  
>HPV63\_Mu\_9626605\_nt6802\_L1\_Tile\_rc|2  
TTGGAGGATCTACGTTTTCTGAAATTCACAGTTTTTTGGAACAGAACGCTGTGCAAGACCA  
>HPV63\_Mu\_9626605\_nt6807\_L1\_Tile\_rc|1  
TAGTATTGGAGGATCTACGTTTTCTGAAATTCACAGTTTTTTGGAACAGAACGCTGTGCAA  
>HPV63\_Mu\_9626605\_nt6832\_L1\_Tile\_rc|1  
GCCCCGTCGCCTCCGTTTGGCCACAGTAGTATTGGAGGATCTACGTTTTCTGAAATTCACA  
>HPV63\_Mu\_9626605\_nt6836\_L1\_Tile\_rc|1  
TCAGGCCCGTCGCCTCCGTTTGGCCACAGTAGTATTGGAGGATCTACGTTTTCTGAAATT  
>HPV65\_Gamma\_312100\_nt5552\_L1\_Tile\_rc|1  
AGAATCATAGAAACCATTATCAATCAATGCAAACCTATTAGGATCTGGTAAATAGAATCT  
>HPV65\_Gamma\_312100\_nt5567\_L1\_Tile\_rc|1  
AAGACGTTTCATGGTCAGAATCATAGAAACCATTATCAATCAATGCAAACCTATTAGGATC



>HPV65\_Gamma\_312100\_nt5582\_L1\_Tile\_rc|2  
TCTGAGTCTCCAAACAAGACGTTTCATGGTCAGAATCATAGAAACCATTATCAATCAATGC  
>HPV65\_Gamma\_312100\_nt5587\_L1\_Tile\_rc|1  
ATTCTCTGAGTCTCCAAACAAGACGTTTCATGGTCAGAATCATAGAAACCATTATCAATC  
>HPV65\_Gamma\_312100\_nt5592\_L1\_Tile\_rc|1  
TTTCTATTCTCTGAGTCTCCAAACAAGACGTTTCATGGTCAGAATCATAGAAACCATTAT  
>HPV65\_Gamma\_312100\_nt5597\_L1\_Tile\_rc|1  
ACCTATTTCTATTCCTCTGAGTCTCCAAACAAGACGTTTCATGGTCAGAATCATAGAAACC  
>HPV65\_Gamma\_312100\_nt5612\_L1\_Tile\_rc|1  
AAGGGGACCACCCCTACCTATTTCTATTCCTCTGAGTCTCCAAACAAGACGTTTCATGGTC  
>HPV65\_Gamma\_312100\_nt5617\_L1\_Tile\_rc|1  
ATCCCAAGGGGACCACCCCTACCTATTTCTATTCCTCTGAGTCTCCAAACAAGACGTTCA  
>HPV65\_Gamma\_312100\_nt5622\_L1\_Tile\_rc|2  
TTCCAATCCCAAGGGGACCACCCCTACCTATTTCTATTCCTCTGAGTCTCCAAACAAGAC  
>HPV65\_Gamma\_312100\_nt5637\_L1\_Tile\_rc|1  
AAGGATGGCCTGTTGTTCCAATCCCAAGGGGACCACCCCTACCTATTTCTATTCCTCTGA  
>HPV65\_Gamma\_312100\_nt5642\_L1\_Tile\_rc|2  
ATATAAAGGATGGCCTGTTGTTCCAATCCCAAGGGGACCACCCCTACCTATTTCTATTCC  
>HPV65\_Gamma\_312100\_nt5652\_L1\_Tile\_rc|1  
CAAACCTATTATATAAAGGATGGCCTGTTGTTCCAATCCCAAGGGGACCACCCCTACCTA  
>HPV65\_Gamma\_312100\_nt5832\_L1\_Tile\_rc|1  
TAGGAGGACAATCTCCTGGTTGAGGAACAGGACTTGCACAAGGCTCAGCCTTATCCCAAT  
>HPV65\_Gamma\_312100\_nt6037\_L1\_Tile\_rc|1  
TATAACTGTTCTCGCCTACCATAAAAAGAATAAGCTATCTCCATAGACATCTTTACTCATT  
>HPV65\_Gamma\_312100\_nt6052\_L1\_Tile\_rc|1  
AAAAAGTGCCTGGCATATAACTGTTCTCGCCTACCATAAAAAGAATAAGCTATCTCCATAG  
>HPV65\_Gamma\_312100\_nt6117\_L1\_Tile\_rc|1  
TCCAGTAATCAGTTTTTAACCTCGAAAGGTTCTGGTAGTGCATCTCCCATTGCTCCTGCTC  
>HPV65\_Gamma\_312100\_nt6122\_L1\_Tile\_rc|2  
AGGAATCCAGTAATCAGTTTTTAACCTCGAAAGGTTCTGGTAGTGCATCTCCCATTGCTCC  
>HPV65\_Gamma\_312100\_nt6127\_L1\_Tile\_rc|1  
TGAGCAGGAATCCAGTAATCAGTTTTTAACCTCGAAAGGTTCTGGTAGTGCATCTCCCATT  
>HPV65\_Gamma\_312100\_nt6132\_L1\_Tile\_rc|1  
CTTCTTGAGCAGGAATCCAGTAATCAGTTTTTAACCTCGAAAGGTTCTGGTAGTGCATCTC  
>HPV65\_Gamma\_312100\_nt6137\_L1\_Tile\_rc|1  
CTGACCTTCTTGAGCAGGAATCCAGTAATCAGTTTTTAACCTCGAAAGGTTCTGGTAGTGC  
>HPV65\_Gamma\_312100\_nt6142\_L1\_Tile\_rc|2  
TGATCCTGACCTTCTTGAGCAGGAATCCAGTAATCAGTTTTTAACCTCGAAAGGTTCTGGT  
>HPV65\_Gamma\_312100\_nt6147\_L1\_Tile\_rc|1  
TATTCTGATCCTGACCTTCTTGAGCAGGAATCCAGTAATCAGTTTTTAACCTCGAAAGGTT  
>HPV65\_Gamma\_312100\_nt6157\_L1\_Tile\_rc|1  
GGACCTAAAGTATTCTGATCCTGACCTTCTTGAGCAGGAATCCAGTAATCAGTTTTTAACC  
>HPV65\_Gamma\_312100\_nt6162\_L1\_Tile\_rc|2  
TATGTGGACCTAAAGTATTCTGATCCTGACCTTCTTGAGCAGGAATCCAGTAATCAGTTT  
>HPV65\_Gamma\_312100\_nt6167\_L1\_Tile\_rc|1  
ATATATATGTGGACCTAAAGTATTCTGATCCTGACCTTCTTGAGCAGGAATCCAGTAATC  
>HPV65\_Gamma\_312100\_nt6182\_L1\_Tile\_rc|2  
ACTAGGAGTGCCTATATATATATGTGGACCTAAAGTATTCTGATCCTGACCTTCTTGAGC  
>HPV65\_Gamma\_312100\_nt6187\_L1\_Tile\_rc|1  
GATCCACTAGGAGTGCCTATATATATATGTGGACCTAAAGTATTCTGATCCTGACCTTCT  
>HPV65\_Gamma\_312100\_nt6197\_L1\_Tile\_rc|1  
TGAAACTAAAGATCCACTAGGAGTGCCTATATATATATGTGGACCTAAAGTATTCTGATC  
>HPV65\_Gamma\_312100\_nt6202\_L1\_Tile\_rc|2  
TCACTTGAAACTAAAGATCCACTAGGAGTGCCTATATATATATGTGGACCTAAAGTATTCT  
>HPV65\_Gamma\_312100\_nt6207\_L1\_Tile\_rc|1

GGGACTCACTTGAACTAAAGATCCACTAGGAGTGCCTATATATATATGTGGACCTAAAG  
>HPV65\_Gamma\_312100\_nt6337\_L1\_Tile\_rc|1  
GTTTTTACAGAAATAGTAAAATTAGTATTATGAGTATTGTCAACAAGTGCACAAATAAT  
>HPV65\_Gamma\_312100\_nt6392\_L1\_Tile\_rc|1  
TAAATACTGTTTAAATCACCTGCTTTATATTTATAGGATTCATCAGCTGCTTCTGTTTT  
>HPV65\_Gamma\_312100\_nt6612\_L1\_Tile\_rc|1  
CCTTTTCAGTACTGGGAGACTGAGTAGGACATCTCGTAGCTCTGGATTGTATAAATCTAT  
>HPV65\_Gamma\_312100\_nt6617\_L1\_Tile\_rc|1  
GTCTTCCTTTTCAGTACTGGGAGACTGAGTAGGACATCTCGTAGCTCTGGATTGTATAAA  
>HPV65\_Gamma\_312100\_nt6632\_L1\_Tile\_rc|1  
TAAATCTTTATAAGGGTCTTCCTTTTCAGTACTGGGAGACTGAGTAGGACATCTCGTAGC  
>HPV65\_Gamma\_312100\_nt6752\_L1\_Tile\_rc|1  
AGTACGTTTTCTTTAAGTGTTCATTAATTAAACCACTTTGATATAAAAAAGCGTCTCCC  
>HPV65\_Gamma\_312100\_nt6757\_L1\_Tile\_rc|1  
TTAATAGTACGTTTTCTTTAAGTGTTCATTAATTAAACCACTTTGATATAAAAAAGCGT  
>HPV65\_Gamma\_312100\_nt6762\_L1\_Tile\_rc|2  
GAGAATTAATAGTACGTTTTCTTTAAGTGTTCATTAATTAAACCACTTTGATATAAAA  
>HPV65\_Gamma\_312100\_nt6767\_L1\_Tile\_rc|1  
AGCTTGAGAATTAATAGTACGTTTTCTTTAAGTGTTCATTAATTAAACCACTTTGATA  
>HPV65\_Gamma\_312100\_nt6772\_L1\_Tile\_rc|1  
GTTGGAGCTTGAGAATTAATAGTACGTTTTCTTTAAGTGTTCATTAATTAAACCACTT  
>HPV65\_Gamma\_312100\_nt6777\_L1\_Tile\_rc|1  
TACTAGTTGGAGCTTGAGAATTAATAGTACGTTTTCTTTAAGTGTTCATTAATTAAAC  
>HPV65\_Gamma\_312100\_nt6782\_L1\_Tile\_rc|2  
TTTAATACTAGTTGGAGCTTGAGAATTAATAGTACGTTTTCTTTAAGTGTTCATTAAT  
>HPV65\_Gamma\_312100\_nt6787\_L1\_Tile\_rc|1  
GAACGTTTAATACTAGTTGGAGCTTGAGAATTAATAGTACGTTTTCTTTAAGTGTTCAC  
>HPV66\_Alpha\_1020290\_nt5763\_L1\_Tile\_rc|1  
TTTTGGTACCAGATTTGGAAACAGAGTAATAAGGATGGCCAACAGCAACCTAGAGC  
>HPV66\_Alpha\_1020290\_nt5778\_L1\_Tile\_rc|1  
CTTTAGGGATGTTTGTTTGGTACCAGATTTGGAAACAGAGTAATAAGGATGGCCAACAG  
>HPV66\_Alpha\_1020290\_nt6148\_L1\_Tile\_rc|1  
AGAGGTGGACAATCCCCTGTATTACCTGGTGTAGACTTACACACCGCGCCCTTAGTCCAA  
>HPV66\_Alpha\_1020290\_nt6153\_L1\_Tile\_rc|1  
ATGCAAGAGGTGGACAATCCCCTGTATTACCTGGTGTAGACTTACACACCGCGCCCTTAG  
>HPV66\_Alpha\_1020290\_nt6168\_L1\_Tile\_rc|1  
TCGGGGTATTAACCTAATGCAAGAGGTGGACAATCCCCTGTATTACCTGGTGTAGACTTAC  
>HPV66\_Alpha\_1020290\_nt6183\_L1\_Tile\_rc|1  
TGTCACCGTCTCTATCGGGGTATTAACCTAATGCAAGAGGTGGACAATCCCCTGTATTAC  
>HPV66\_Alpha\_1020290\_nt6418\_L1\_Tile\_rc|1  
TTCCAATACAAATCTGTAGGAATGGCTTCCCCAACATTACCTGCCCTATTAAAGTAATGT  
>HPV66\_Alpha\_1020290\_nt6428\_L1\_Tile\_rc|1  
ATTGCCACCCTTCCAATACAAATCTGTAGGAATGGCTTCCCCAACATTACCTGCCCTATT  
>HPV66\_Alpha\_1020290\_nt6438\_L1\_Tile\_rc|1  
GGTCCCTGCCATTGCCACCCTTCCAATACAAATCTGTAGGAATGGCTTCCCCAACATTAC  
>HPV66\_Alpha\_1020290\_nt6443\_L1\_Tile\_rc|1  
AGGAGGGTCCCTGCCATTGCCACCCTTCCAATACAAATCTGTAGGAATGGCTTCCCCAAC  
>HPV66\_Alpha\_1020290\_nt6448\_L1\_Tile\_rc|1  
CTGGGAGGAGGTCCCTGCCATTGCCACCCTTCCAATACAAATCTGTAGGAATGGCTTCC  
>HPV66\_Alpha\_1020290\_nt6453\_L1\_Tile\_rc|1  
CAGAACTGGGAGGAGGTCCCTGCCATTGCCACCCTTCCAATACAAATCTGTAGGAATGG  
>HPV66\_Alpha\_1020290\_nt6458\_L1\_Tile\_rc|1  
ATATACAGAAGTGGGAGGAGGTCCCTGCCATTGCCACCCTTCCAATACAAATCTGTAGG  
>HPV66\_Alpha\_1020290\_nt6718\_L1\_Tile\_rc|1  
CAAAGTTGAAACACAACTGTAGTTCATATTCCTCCACATGGCGAAGGTATTGATTGATT

>HPV66\_Alpha\_1020290\_nt6793\_L1\_Tile\_rc|1  
ATATTCCAATCGTCTAATAAAGTATTATTTCATATTATGCAAATATGCCATAACTTCTGCA  
>HPV66\_Alpha\_1020290\_nt6798\_L1\_Tile\_rc|1  
AGCCAATATTCCAATCGTCTAATAAAGTATTATTTCATATTATGCAAATATGCCATAACTT  
>HPV66\_Alpha\_1020290\_nt6808\_L1\_Tile\_rc|1  
GGTGGGGATAAGCCAATATTCCAATCGTCTAATAAAGTATTATTTCATATTATGCAAATAT  
>HPV66\_Alpha\_1020290\_nt6813\_L1\_Tile\_rc|1  
CAACTGGTGGGGATAAGCCAATATTCCAATCGTCTAATAAAGTATTATTTCATATTATGCA  
>HPV66\_Alpha\_1020290\_nt6823\_L1\_Tile\_rc|1  
AAGCTAGTTGCAACTGGTGGGGATAAGCCAATATTCCAATCGTCTAATAAAGTATTATTC  
>HPV66\_Alpha\_1020290\_nt6828\_L1\_Tile\_rc|1  
CCTCTAAGCTAGTTGCAACTGGTGGGGATAAGCCAATATTCCAATCGTCTAATAAAGTAT  
>HPV66\_Alpha\_1020290\_nt6833\_L1\_Tile\_rc|1  
TTTATCCTCTAAGCTAGTTGCAACTGGTGGGGATAAGCCAATATTCCAATCGTCTAATAA  
>HPV66\_Alpha\_1020290\_nt6838\_L1\_Tile\_rc|1  
CTATATTTATCCTCTAAGCTAGTTGCAACTGGTGGGGATAAGCCAATATTCCAATCGTCT  
>HPV66\_Alpha\_1020290\_nt6853\_L1\_Tile\_rc|1  
GTGCTTTTAATATACCTATATTTATCCTCTAAGCTAGTTGCAACTGGTGGGGATAAGCCA  
>HPV66\_Alpha\_1020290\_nt6863\_L1\_Tile\_rc|1  
TGTAATAGCTGTGCTTTTAAATATACCTATATTTATCCTCTAAGCTAGTTGCAACTGGTGG  
>HPV66\_Alpha\_1020290\_nt7038\_L1\_Tile\_rc|1  
AGGCAGATACACTAGCCTTGGGTCTAGGGGGTCTAGGGCCTAGTTGCATTAAAAATTTTC  
>HPV66\_Alpha\_1020290\_nt7043\_L1\_Tile\_rc|1  
TTTAGAGGCAGATACACTAGCCTTGGGTCTAGGGGGTCTAGGGCCTAGTTGCATTAAAA  
>HPV66\_Alpha\_1020290\_nt7063\_L1\_Tile\_rc|1  
GAGGTAGGAGCCGCCGCCTTTTAGAGGCAGATACACTAGCCTTGGGTCTAGGGGGTCTA  
>HPV66\_Alpha\_1020290\_nt7078\_L1\_Tile\_rc|1  
GGTGAAGAAGAGGAAGAGGTAGGAGCCGCCGCCTTTTAGAGGCAGATACACTAGCCTTG  
>HPV66\_Alpha\_1020290\_nt7083\_L1\_Tile\_rc|1  
TAGCTGGTGAAGAAGAGGAAGAGGTAGGAGCCGCCGCCTTTTAGAGGCAGATACACTAG  
>HPV67\_Alpha\_3228267\_nt5725\_L1\_Tile\_rc|1  
GGAGGGATTAGGAATGGAAAAGTAAGGATGGCCTACAGCTAAAAGTCTGGAGCTACCAGC  
>HPV67\_Alpha\_3228267\_nt5735\_L1\_Tile\_rc|1  
TTTTAGTGTTGGAGGGATTAGGAATGGAAAAGTAAGGATGGCCTACAGCTAAAAGTCTGG  
>HPV67\_Alpha\_3228267\_nt5740\_L1\_Tile\_rc|1  
CACCTTTTTAGTGTTGGAGGGATTAGGAATGGAAAAGTAAGGATGGCCTACAGCTAAAAG  
>HPV67\_Alpha\_3228267\_nt5750\_L1\_Tile\_rc|1  
TGGGCACTAACACCTTTTTAGTGTTGGAGGGATTAGGAATGGAAAAGTAAGGATGGCCTA  
>HPV67\_Alpha\_3228267\_nt5760\_L1\_Tile\_rc|1  
CCTGACACCTTGGGCACTAACACCTTTTTAGTGTTGGAGGGATTAGGAATGGAAAAGTAA  
>HPV67\_Alpha\_3228267\_nt5765\_L1\_Tile\_rc|1  
GCAAACCTGACACCTTGGGCACTAACACCTTTTTAGTGTTGGAGGGATTAGGAATGGAAA  
>HPV67\_Alpha\_3228267\_nt5970\_L1\_Tile\_rc|1  
CTAGGGTATTTATTATTTGTTTCAGTATCATCAAACCTATTAAAGTAATGGATGTCCACTA  
>HPV67\_Alpha\_3228267\_nt5975\_L1\_Tile\_rc|1  
GCTGGCTAGGGTATTTATTATTTGTTTCAGTATCATCAAACCTATTAAAGTAATGGATGTC  
>HPV67\_Alpha\_3228267\_nt5985\_L1\_Tile\_rc|1  
TCAGTACCAGGCTGGCTAGGGTATTTATTATTTGTTTCAGTATCATCAAACCTATTAAAGT  
>HPV67\_Alpha\_3228267\_nt6005\_L1\_Tile\_rc|1  
TAGACAAGCATTCCTATTATCAGTACCAGGCTGGCTAGGGTATTTATTATTTGTTTCAG  
>HPV67\_Alpha\_3228267\_nt6020\_L1\_Tile\_rc|1  
TTTGCTTAGCATCCATAGACAAGCATTCCTATTATCAGTACCAGGCTGGCTAGGGTATT  
>HPV67\_Alpha\_3228267\_nt6105\_L1\_Tile\_rc|1  
GGCCCATTAAGTTACCACTACACGGGGTACCTTTACCCAGTGTTACCTGTAGGAGGT  
>HPV67\_Alpha\_3228267\_nt6280\_L1\_Tile\_rc|1

CTCGCTAGCCATACCAAGATAATCAGGATATTTACAAATACTGGTACATATATCTAACGG  
>HPV67\_Alpha\_3228267\_nt6320\_L1\_Tile\_rc|1  
GCTCACGTCGCAGGAAGAAAAATAAACTGTCCCCATAAGCCTCGCTAGCCATACCAAGAT  
>HPV67\_Alpha\_3228267\_nt6360\_L1\_Tile\_rc|1  
AATTTACCTGCTCTGTTAAACAAATGCCTAACAAACATTTGCTCACGTCGCAGGAAGAAA  
>HPV67\_Alpha\_3228267\_nt6385\_L1\_Tile\_rc|1  
CAAATCTGTAGGTACATCCTCCCCTAATTTACCTGCTCTGTTAAACAAATGCCTAACAAA  
>HPV67\_Alpha\_3228267\_nt6395\_L1\_Tile\_rc|1  
CCTTAAAAATACAAATCTGTAGGTACATCCTCCCCTAATTTACCTGCTCTGTTAAACAAAT  
>HPV67\_Alpha\_3228267\_nt6400\_L1\_Tile\_rc|1  
AGATCCCTTAAAAATACAAATCTGTAGGTACATCCTCCCCTAATTTACCTGCTCTGTTAAA  
>HPV67\_Alpha\_3228267\_nt6405\_L1\_Tile\_rc|1  
TTTGCAGATCCCTTAAAAATACAAATCTGTAGGTACATCCTCCCCTAATTTACCTGCTCTG  
>HPV67\_Alpha\_3228267\_nt6410\_L1\_Tile\_rc|1  
AAGTGTTCGAGATCCCTTAAAAATACAAATCTGTAGGTACATCCTCCCCTAATTTACCTG  
>HPV67\_Alpha\_3228267\_nt6415\_L1\_Tile\_rc|1  
TGCAGAAGTGTTCGAGATCCCTTAAAAATACAAATCTGTAGGTACATCCTCCCCTAATTT  
>HPV67\_Alpha\_3228267\_nt6430\_L1\_Tile\_rc|1  
AGCTGAGGTTCGAGTGCAGAAGTGTTCGAGATCCCTTAAAAATACAAATCTGTAGGTAC  
>HPV67\_Alpha\_3228267\_nt6435\_L1\_Tile\_rc|1  
AAAAAAGCTGAGGTTCGAGTGCAGAAGTGTTCGAGATCCCTTAAAAATACAAATCTGTA  
>HPV67\_Alpha\_3228267\_nt6440\_L1\_Tile\_rc|1  
TAGGAAAAAAGCTGAGGTTCGAGTGCAGAAGTGTTCGAGATCCCTTAAAAATACAAAT  
>HPV67\_Alpha\_3228267\_nt6450\_L1\_Tile\_rc|1  
CCACTGGGAGTAGGAAAAAAGCTGAGGTTCGAGTGCAGAAGTGTTCGAGATCCCTTA  
>HPV67\_Alpha\_3228267\_nt6620\_L1\_Tile\_rc|1  
ATGTAGCCTCTGATTTTTCTCAGAACATAAAGTCATGTTGGTACTACGTGTAGTGTCTA  
>HPV67\_Alpha\_3228267\_nt6625\_L1\_Tile\_rc|1  
TTTGTATGTAGCCTCTGATTTTTCTCAGAACATAAAGTCATGTTGGTACTACGTGTAGT  
>HPV67\_Alpha\_3228267\_nt6630\_L1\_Tile\_rc|1  
TCATTTTTGTATGTAGCCTCTGATTTTTCTCAGAACATAAAGTCATGTTGGTACTACGT  
>HPV67\_Alpha\_3228267\_nt6735\_L1\_Tile\_rc|1  
GTGTGTATGTATTGCATAACATTTGCAGTAAGGGATATTTTGCACAGCTGAAATATAAAC  
>HPV67\_Alpha\_3228267\_nt6750\_L1\_Tile\_rc|1  
ATATCTGGATTTCATGGTGTGTATGTATTGCATAACATTTGCAGTAAGGGATATTTTGCAC  
>HPV67\_Alpha\_3228267\_nt6755\_L1\_Tile\_rc|1  
CTAATATATCTGGATTTCATGGTGTGTATGTATTGCATAACATTTGCAGTAAGGGATATTT  
>HPV67\_Alpha\_3228267\_nt6760\_L1\_Tile\_rc|1  
GTCTCTAATATATCTGGATTTCATGGTGTGTATGTATTGCATAACATTTGCAGTAAGGGA  
>HPV67\_Alpha\_3228267\_nt6765\_L1\_Tile\_rc|1  
TGCCAGTCCTCTAATATATCTGGATTTCATGGTGTGTATGTATTGCATAACATTTGCAGTA  
>HPV67\_Alpha\_3228267\_nt6770\_L1\_Tile\_rc|1  
CAAATTGCCAGTCCTCTAATATATCTGGATTTCATGGTGTGTATGTATTGCATAACATTTG  
>HPV67\_Alpha\_3228267\_nt6890\_L1\_Tile\_rc|1  
TGTACTTTTTAAGAGGATCTTCCTTTGCTGTTGGAGGGGATGTTTTTTGACAGGTAATAG  
>HPV67\_Alpha\_3228267\_nt6895\_L1\_Tile\_rc|1  
AAAAGTGTACTTTTTAAGAGGATCTTCCTTTGCTGTTGGAGGGGATGTTTTTTGACAGGT  
>HPV67\_Alpha\_3228267\_nt7015\_L1\_Tile\_rc|1  
AGAAGGTGAAGAACGTTTTAGTTTAGGTTAGCTGTAAACCTGCCTGCAATAAAAAATTT  
>HPV67\_Alpha\_3228267\_nt7020\_L1\_Tile\_rc|1  
GAAGAAGAAGGTGAAGAACGTTTTAGTTTAGGTTAGCTGTAAACCTGCCTGCAATAAAA  
>HPV68a\_Alpha\_71726685\_nt5599\_L1\_Tile\_rc|1  
CCCCCAGACATAGGAACCTTAAAAATATGGATGGCCTACAGTTAATAACCTAGATGTACCA  
>HPV68a\_Alpha\_71726685\_nt5979\_L1\_Tile\_rc|1  
CCCCTTGTTGTACATTGGTAGGCTTACAAGATTTACCTTTGGCCCAGTGCTCGCCAATAG

>HPV68a\_Alpha\_71726685\_nt5999\_L1\_Tile\_rc|1  
CAATTCCAATGGGGGACAGTCCCCTTGTTGTACATTGGTAGGCTTACAAGATTTACCTTT  
>HPV68a\_Alpha\_71726685\_nt6004\_L1\_Tile\_rc|1  
TTTACCAATTCCAATGGGGGACAGTCCCCTTGTTGTACATTGGTAGGCTTACAAGATTTA  
>HPV68a\_Alpha\_71726685\_nt6009\_L1\_Tile\_rc|1  
GAGTATTTACCAATTCCAATGGGGGACAGTCCCCTTGTTGTACATTGGTAGGCTTACAAG  
>HPV68a\_Alpha\_71726685\_nt6114\_L1\_Tile\_rc|1  
AAACAGATTGACATATATCCAAAGGTACCTCGCTTTTCGTTTCTTGTAATGTACCAAAGT  
>HPV68a\_Alpha\_71726685\_nt6254\_L1\_Tile\_rc|1  
CATGTCTAGTGGGAATAGTGTCCCCTACCATGCCTCCCCTATTCCAAAAATGCCTGGCAAA  
>HPV68a\_Alpha\_71726685\_nt6259\_L1\_Tile\_rc|1  
ATATACATGTCAGTGGGAATAGTGTCCCCTACCATGCCTCCCCTATTCCAAAAATGCCTG  
>HPV68a\_Alpha\_71726685\_nt6264\_L1\_Tile\_rc|1  
CCTTAATATACATGTCAGTGGGAATAGTGTCCCCTACCATGCCTCCCCTATTCCAAAAAT  
>HPV68a\_Alpha\_71726685\_nt6279\_L1\_Tile\_rc|1  
CACGAATGTCAGTGCCCTTAATATACATGTCAGTGGGAATAGTGTCCCCTACCATGCCTC  
>HPV68a\_Alpha\_71726685\_nt6289\_L1\_Tile\_rc|1  
CTAGGAGTTTCACGAATGTCAGTGCCTTAATATACATGTCAGTGGGAATAGTGTCCCCT  
>HPV68a\_Alpha\_71726685\_nt6294\_L1\_Tile\_rc|1  
AACTACTAGGAGTTTCACGAATGTCAGTGCCTTAATATACATGTCAGTGGGAATAGTGT  
>HPV68a\_Alpha\_71726685\_nt6299\_L1\_Tile\_rc|1  
CACATAACTACTAGGAGTTTCACGAATGTCAGTGCCTTAATATACATGTCAGTGGGAAT  
>HPV68a\_Alpha\_71726685\_nt6304\_L1\_Tile\_rc|1  
GCATACACATAACTACTAGGAGTTTCACGAATGTCAGTGCCTTAATATACATGTCAGTG  
>HPV68a\_Alpha\_71726685\_nt6469\_L1\_Tile\_rc|1  
GTAGTGGACAATGTAAATTAGTACTGCGCGTTGTATCCACAACGGTAAGAAATAATTGA  
>HPV68a\_Alpha\_71726685\_nt6489\_L1\_Tile\_rc|1  
CTGGTACAGTAGAGTCTGTAGTAGTGACAATGTAAATTAGTACTGCGCGTTGTATCCA  
>HPV68a\_Alpha\_71726685\_nt6504\_L1\_Tile\_rc|1  
TAGAATCATACACAGCTGGTACAGTAGAGTCTGTAGTAGTGACAATGTAAATTAGTAC  
>HPV68a\_Alpha\_71726685\_nt6509\_L1\_Tile\_rc|1  
TTTATTAGAATCATACACAGCTGGTACAGTAGAGTCTGTAGTAGTGACAATGTAAATTT  
>HPV68a\_Alpha\_71726685\_nt6514\_L1\_Tile\_rc|1  
TTAAATTTATTAGAATCATACACAGCTGGTACAGTAGAGTCTGTAGTAGTGACAATGTA  
>HPV68a\_Alpha\_71726685\_nt6624\_L1\_Tile\_rc|1  
TAGCAGGATTCATAGTATGTATATATGACATTACATCAGTGGATAATGTTATAGTACACA  
>HPV68a\_Alpha\_71726685\_nt6729\_L1\_Tile\_rc|1  
GGGCGTCCCTTTTGACATGTAATTGCTGCTGATTGTAGGTAGCGGTATGTATCTACAAGAC  
>HPV68a\_Alpha\_71726685\_nt6819\_L1\_Tile\_rc|1  
GGAATTGGTCCAGTTCAGAACTAACTTTTCCTTTAAATCCACATTCCAAAAGTTAAGAC  
>HPV68a\_Alpha\_71726685\_nt6824\_L1\_Tile\_rc|1  
TAATGGGAATTGGTCCAGTTCAGAACTAACTTTTCCTTTAAATCCACATTCCAAAAGTT  
>HPV68a\_Alpha\_71726685\_nt6839\_L1\_Tile\_rc|1  
CAGAAATTTGCGTCCTAATGGGAATTGGTCCAGTTCAGAACTAACTTTTCCTTTAAATC  
>HPV68a\_Alpha\_71726685\_nt6844\_L1\_Tile\_rc|1  
TGTAACAGAAATTTGCGTCCTAATGGGAATTGGTCCAGTTCAGAACTAACTTTTCCTTT  
>HPV68a\_Alpha\_71726685\_nt6849\_L1\_Tile\_rc|1  
CTGCCTGTAACAGAAATTTGCGTCCTAATGGGAATTGGTCCAGTTCAGAACTAACTTTT  
>HPV68a\_Alpha\_71726685\_nt6859\_L1\_Tile\_rc|1  
CTGCGAACACCTGCCTGTAACAGAAATTTGCGTCCTAATGGGAATTGGTCCAGTTCAGAA  
>HPV68a\_Alpha\_71726685\_nt6864\_L1\_Tile\_rc|1  
GCCGTCTGCGAACACCTGCCTGTAACAGAAATTTGCGTCCTAATGGGAATTGGTCCAGTT  
>HPV68a\_Alpha\_71726685\_nt6869\_L1\_Tile\_rc|1  
GGTGGGCCGTCTGCGAACACCTGCCTGTAACAGAAATTTGCGTCCTAATGGGAATTGGTC  
>HPV68a\_Alpha\_71726685\_nt6874\_L1\_Tile\_rc|1

CCTATGGTGGGCCGTCTGCGAACACCTGCCTGTAACAGAAATTTGCGTCCTAATGGGAAT  
>HPV68a\_Alpha\_71726685\_nt6924\_L1\_Tile\_rc|1  
TGTGTTTAGAGGTAGATGTGGTAGCTGCAGTGGCAGTGCCTTTACGAGGGCCTATGGTGG  
>HPV68a\_Alpha\_71726685\_nt6929\_L1\_Tile\_rc|1  
ACGTTTGTGTTTAGAGGTAGATGTGGTAGCTGCAGTGGCAGTGCCTTTACGAGGGCCTAT  
>HPV69\_Alpha\_6970418\_nt5592\_L1\_Tile\_rc|1  
CCTGCATAGTAATATATCCGGTGCCTGTACATATTCATCCGTCTGACAACCCGGGACACA  
>HPV69\_Alpha\_6970418\_nt5602\_L1\_Tile\_rc|2  
TCGAGAGCTGCCTGCATAGTAATATATCCGGTGCCTGTACATATTCATCCGTCTGACAAC  
>HPV69\_Alpha\_6970418\_nt5607\_L1\_Tile\_rc|1  
AATAATCGAGAGCTGCCTGCATAGTAATATATCCGGTGCCTGTACATATTCATCCGTCTG  
>HPV69\_Alpha\_6970418\_nt5612\_L1\_Tile\_rc|1  
AAGTTAATAATCGAGAGCTGCCTGCATAGTAATATATCCGGTGCCTGTACATATTCATCC  
>HPV69\_Alpha\_6970418\_nt5617\_L1\_Tile\_rc|1  
ACCCAAAGTTAATAATCGAGAGCTGCCTGCATAGTAATATATCCGGTGCCTGTACATATT  
>HPV69\_Alpha\_6970418\_nt5652\_L1\_Tile\_rc|1  
GTTGAACCAGATTTAGGAATTGGAAAATAGGGATGACCCAAAGTTAATAATCGAGAGCTG  
>HPV69\_Alpha\_6970418\_nt5657\_L1\_Tile\_rc|1  
CTGCTGTTGAACCAGATTTAGGAATTGGAAAATAGGGATGACCCAAAGTTAATAATCGAG  
>HPV69\_Alpha\_6970418\_nt5662\_L1\_Tile\_rc|2  
AATTTCTGCTGTTGAACCAGATTTAGGAATTGGAAAATAGGGATGACCCAAAGTTAATAA  
>HPV69\_Alpha\_6970418\_nt5682\_L1\_Tile\_rc|2  
TGGTAAGCAGACACTTTAGGAATTTCTGCTGTTGAACCAGATTTAGGAATTGGAAAATAG  
>HPV69\_Alpha\_6970418\_nt5687\_L1\_Tile\_rc|1  
TATATTGGTAAGCAGACACTTTAGGAATTTCTGCTGTTGAACCAGATTTAGGAATTGGAA  
>HPV69\_Alpha\_6970418\_nt5917\_L1\_Tile\_rc|1  
CACGTTGTCCCTATTATCAGTGTCTGCATTAGCAGTGGCAAGATGTGAATTTTCAGTGTG  
>HPV69\_Alpha\_6970418\_nt5927\_L1\_Tile\_rc|1  
TATCTACACACACGTTGTCCCTATTATCAGTGTCTGCATTAGCAGTGGCAAGATGTGAAT  
>HPV69\_Alpha\_6970418\_nt5932\_L1\_Tile\_rc|1  
TTTATTATCTACACACACGTTGTCCCTATTATCAGTGTCTGCATTAGCAGTGGCAAGATG  
>HPV69\_Alpha\_6970418\_nt6007\_L1\_Tile\_rc|1  
ATTTTTACATACAGTGCCAACGCCCCAGTGTTACCTAAAGGAGGGGTACATCCAATAAT  
>HPV69\_Alpha\_6970418\_nt6012\_L1\_Tile\_rc|1  
TGTGCATTTTTACATACAGTGCCAACGCCCCAGTGTTACCTAAAGGAGGGGTACATCCA  
>HPV69\_Alpha\_6970418\_nt6017\_L1\_Tile\_rc|1  
GAGACTGTGCATTTTTACATACAGTGCCAACGCCCCAGTGTTACCTAAAGGAGGGGTAC  
>HPV69\_Alpha\_6970418\_nt6167\_L1\_Tile\_rc|1  
AAATAGATTGATTAATATCAAGTGGCACATCACATTTTGTAGCTTGCAAAGCTGTAAAAT  
>HPV69\_Alpha\_6970418\_nt6172\_L1\_Tile\_rc|1  
TTTGCAAATAGATTGATTAATATCAAGTGGCACATCACATTTTGTAGCTTGCAAAGCTGT  
>HPV69\_Alpha\_6970418\_nt6317\_L1\_Tile\_rc|1  
CTTTAATATACATAGATACTGGTACAGAATCACCTATAGTGCCAGCTTTATTAATAA  
>HPV69\_Alpha\_6970418\_nt6322\_L1\_Tile\_rc|2  
AGCGCCTTTAATATACATAGATACTGGTACAGAATCACCTATAGTGCCAGCTTTATTA  
>HPV69\_Alpha\_6970418\_nt6327\_L1\_Tile\_rc|1  
TGACCAGCGCCTTTAATATACATAGATACTGGTACAGAATCACCTATAGTGCCAGCTTTA  
>HPV69\_Alpha\_6970418\_nt6332\_L1\_Tile\_rc|1  
GACCTTGACCAGCGCCTTTAATATACATAGATACTGGTACAGAATCACCTATAGTGCCAG  
>HPV69\_Alpha\_6970418\_nt6337\_L1\_Tile\_rc|1  
TTCACGACCTTGACCAGCGCCTTTAATATACATAGATACTGGTACAGAATCACCTATAGT  
>HPV69\_Alpha\_6970418\_nt6342\_L1\_Tile\_rc|2  
GGAGGTTACAGACCTTGACCAGCGCCTTTAATATACATAGATACTGGTACAGAATCACCT  
>HPV69\_Alpha\_6970418\_nt6357\_L1\_Tile\_rc|1  
TATATAGAAGTAGTTGGAGGTTACAGACCTTGACCAGCGCCTTTAATATACATAGATACT

>HPV69\_Alpha\_6970418\_nt6362\_L1\_Tile\_rc|2  
GTGAGTATATAGAAGTAGTTGGAGGTTACGACCTTGACCAGCGCCTTTAATATACATAG  
>HPV69\_Alpha\_6970418\_nt6367\_L1\_Tile\_rc|1  
CGTACGTGAGTATATAGAAGTAGTTGGAGGTTACGACCTTGACCAGCGCCTTTAATATA  
>HPV69\_Alpha\_6970418\_nt6377\_L1\_Tile\_rc|1  
AGCCACTAGGCGTACGTGAGTATATAGAAGTAGTTGGAGGTTACGACCTTGACCAGCGC  
>HPV69\_Alpha\_6970418\_nt6387\_L1\_Tile\_rc|1  
GTCACCATGGAGCCACTAGGCGTACGTGAGTATATAGAAGTAGTTGGAGGTTACGACCT  
>HPV69\_Alpha\_6970418\_nt6402\_L1\_Tile\_rc|2  
AATTGAGCATCAGAGGTCACCATGGAGCCACTAGGCGTACGTGAGTATATAGAAGTAGTT  
>HPV69\_Alpha\_6970418\_nt6677\_L1\_Tile\_rc|1  
TAGAATTCATTGTATGGATATAGGCCATTACATCAGTGGTAAGAGTAATTTTACACAATT  
>HPV69\_Alpha\_6970418\_nt6682\_L1\_Tile\_rc|2  
AATAGTAGAATTCATTGTATGGATATAGGCCATTACATCAGTGGTAAGAGTAATTTTACA  
>HPV69\_Alpha\_6970418\_nt6717\_L1\_Tile\_rc|1  
GGAGGCAAGGTAAGGCCAAAATTCCAATTTTCCAAAATAGTAGAATTCATTGTATGGATA  
>HPV69\_Alpha\_6970418\_nt6927\_L1\_Tile\_rc|1  
AACTTAGGACGTCGCTGTATACCAGCCTGCAGCATAAAATTTTCTGCCCAGTGGAATTGA  
>HPV69\_Alpha\_6970418\_nt6932\_L1\_Tile\_rc|1  
TGCCTAACTTAGGACGTCGCTGTATACCAGCCTGCAGCATAAAATTTTCTGCCCAGTGGA  
>HPV69\_Alpha\_6970418\_nt6937\_L1\_Tile\_rc|1  
TTTGGTGCCTAACTTAGGACGTCGCTGTATACCAGCCTGCAGCATAAAATTTTCTGCCCAG  
>HPV69\_Alpha\_6970418\_nt6942\_L1\_Tile\_rc|2  
GGACGTTTGGTGCCTAACTTAGGACGTCGCTGTATACCAGCCTGCAGCATAAAATTTTCTG  
>HPV69\_Alpha\_6970418\_nt6947\_L1\_Tile\_rc|1  
AAGCTGGACGTTTGGTGCCTAACTTAGGACGTCGCTGTATACCAGCCTGCAGCATAAAATT  
>HPV69\_Alpha\_6970418\_nt6957\_L1\_Tile\_rc|1  
GATAAGGAAGAAGCTGGACGTTTGGTGCCTAACTTAGGACGTCGCTGTATACCAGCCTGC  
>HPV69\_Alpha\_6970418\_nt6962\_L1\_Tile\_rc|2  
ATGCAGATAAGGAAGAAGCTGGACGTTTGGTGCCTAACTTAGGACGTCGCTGTATACCAG  
>HPV69\_Alpha\_6970418\_nt6967\_L1\_Tile\_rc|1  
GGAAGATGCAGATAAGGAAGAAGCTGGACGTTTGGTGCCTAACTTAGGACGTCGCTGTAT  
>HPV70\_Alpha\_1173493\_nt6391\_L1\_Tile\_rc|1  
TGAGTACCAGGACGCTCACGTATATCCGTGCCTTTAATATATAACTCTGAAGGTATTGTG  
>HPV70\_Alpha\_1173493\_nt6396\_L1\_Tile\_rc|1  
ATACATGAGTACCAGGACGCTCACGTATATCCGTGCCTTTAATATATAACTCTGAAGGTA  
>HPV70\_Alpha\_1173493\_nt6406\_L1\_Tile\_rc|1  
GAAGGGGAATATACATGAGTACCAGGACGCTCACGTATATCCGTGCCTTTAATATATAAC  
>HPV70\_Alpha\_1173493\_nt6586\_L1\_Tile\_rc|1  
GCAGGTATGGCCGTTTCGGTGCAGGCAGACAATGTAAAATTAGTACTACGTGTAGTGTCC  
>HPV70\_Alpha\_1173493\_nt6591\_L1\_Tile\_rc|1  
ATACAGCAGGTATGGCCGTTTCGGTGCAGGCAGACAATGTAAAATTAGTACTACGTGTAG  
>HPV70\_Alpha\_1173493\_nt6596\_L1\_Tile\_rc|1  
GCTATATACAGCAGGTATGGCCGTTTCGGTGCAGGCAGACAATGTAAAATTAGTACTACG  
>HPV70\_Alpha\_1173493\_nt6601\_L1\_Tile\_rc|1  
GTAGGGCTATATACAGCAGGTATGGCCGTTTCGGTGCAGGCAGACAATGTAAAATTAGTA  
>HPV70\_Alpha\_1173493\_nt6606\_L1\_Tile\_rc|1  
ACTTTGTAGGGCTATATACAGCAGGTATGGCCGTTTCGGTGCAGGCAGACAATGTAAAAT  
>HPV70\_Alpha\_1173493\_nt6611\_L1\_Tile\_rc|1  
CTTAAACTTTGTAGGGCTATATACAGCAGGTATGGCCGTTTCGGTGCAGGCAGACAATGT  
>HPV70\_Alpha\_1173493\_nt6626\_L1\_Tile\_rc|1  
ATGCCTAGTATATTCTTAAACTTTGTAGGGCTATATACAGCAGGTATGGCCGTTTCGGT  
>HPV70\_Alpha\_1173493\_nt6711\_L1\_Tile\_rc|1  
TCATAGTATGGATGTAGGCCATAACGTCAGCAGTTAATGTGATAGTACACAATTGAAATA  
>HPV70\_Alpha\_1173493\_nt6746\_L1\_Tile\_rc|1

AACTCCTATATTCCAATTGTCCAAAATTGCAGGATTCATAGTATGGATGTAGGCCATAAC  
>HPV70\_Alpha\_1173493\_nt6791\_L1\_Tile\_rc|1  
TAAATACCTATACGTGTCCACCAAGCTTGCAGATGGTGGAGGGGTAACCTATATTCCA  
>HPV70\_Alpha\_1173493\_nt6796\_L1\_Tile\_rc|1  
GATTGTAAATACCTATACGTGTCCACCAAGCTTGCAGATGGTGGAGGGGTAACCTCTATA  
>HPV70\_Alpha\_1173493\_nt6801\_L1\_Tile\_rc|1  
CTGCTGATTGTAAATACCTATACGTGTCCACCAAGCTTGCAGATGGTGGAGGGGTAACCTC  
>HPV70\_Alpha\_1173493\_nt6806\_L1\_Tile\_rc|1  
TATAGCTGCTGATTGTAAATACCTATACGTGTCCACCAAGCTTGCAGATGGTGGAGGGGT  
>HPV70\_Alpha\_1173493\_nt6811\_L1\_Tile\_rc|1  
CATGCTATAGCTGCTGATTGTAAATACCTATACGTGTCCACCAAGCTTGCAGATGGTGGA  
>HPV70\_Alpha\_1173493\_nt6831\_L1\_Tile\_rc|1  
GTGTAGGAGCATCCTTTTGACATGCTATAGCTGCTGATTGTAAATACCTATACGTGTCCA  
>HPV70\_Alpha\_1173493\_nt6836\_L1\_Tile\_rc|1  
TTCAGGTGTAGGAGCATCCTTTTGACATGCTATAGCTGCTGATTGTAAATACCTATACGT  
>HPV70\_Alpha\_1173493\_nt7001\_L1\_Tile\_rc|1  
CGATTTAGCTGACGCAGGGCGTTTGCGAGGGCCTATAGTAGGACGTCTGCGAGCCCCTAC  
>HPV70\_Alpha\_1173493\_nt7016\_L1\_Tile\_rc|1  
AGAGGCTGAGGAAGACGATTTAGCTGACGCAGGGCGTTTGCGAGGGCCTATAGTAGGACG  
>HPV70\_Alpha\_1173493\_nt7021\_L1\_Tile\_rc|1  
TGTTTAGAGGCTGAGGAAGACGATTTAGCTGACGCAGGGCGTTTGCGAGGGCCTATAGTA  
>HPV70\_Alpha\_1173493\_nt7026\_L1\_Tile\_rc|1  
GTTTGTGTTTAGAGGCTGAGGAAGACGATTTAGCTGACGCAGGGCGTTTGCGAGGGCCTA  
>HPV70\_Alpha\_1173493\_nt7031\_L1\_Tile\_rc|1  
TTTCCGTTTGTGTTTAGAGGCTGAGGAAGACGATTTAGCTGACGCAGGGCGTTTGCGAGG  
>HPV71\_Alpha\_12084981\_nt5907\_L1\_Tile\_rc|1  
CAGTAAGTAATCTAGAACTACCAGCATAATAAAATAGTTTTGTTCTGGTAACATAGTCGT  
>HPV71\_Alpha\_12084981\_nt5952\_L1\_Tile\_rc|1  
GATTTTTTACCCTTGCCTGGCGAATAGGAAAATATGGATGGCCAACAGTAAGTAATCTAG  
>HPV71\_Alpha\_12084981\_nt5957\_L1\_Tile\_rc|1  
TATACGATTTTTTACCCTTGCCTGGCGAATAGGAAAATATGGATGGCCAACAGTAAGTAA  
>HPV71\_Alpha\_12084981\_nt5967\_L1\_Tile\_rc|1  
TGGGGACAACCTATACGATTTTTTACCCTTGCCTGGCGAATAGGAAAATATGGATGGCCAA  
>HPV71\_Alpha\_12084981\_nt5972\_L1\_Tile\_rc|1  
CACTTTGGGGACAACCTATACGATTTTTTACCCTTGCCTGGCGAATAGGAAAATATGGATG  
>HPV71\_Alpha\_12084981\_nt6072\_L1\_Tile\_rc|1  
CTAAGCGCTGGGTATCGGGATTGTATAATGAAGCATCAGGTAGTCCAAATTTATTTGGGT  
>HPV71\_Alpha\_12084981\_nt6087\_L1\_Tile\_rc|1  
CCTTACAAGCCCACCTAAGCGCTGGGTATCGGGATTGTATAATGAAGCATCAGGTAGTC  
>HPV71\_Alpha\_12084981\_nt6192\_L1\_Tile\_rc|1  
GATTAAACATCAAACAGCGTGGCATTTCAGTGTCATTAAGCTTGTTAAACAATGGATGGC  
>HPV71\_Alpha\_12084981\_nt6197\_L1\_Tile\_rc|1  
ACCAGGATTAACATCAAACAGCGTGGCATTTCAGTGTCATTAAGCTTGTTAAACAATGG  
>HPV71\_Alpha\_12084981\_nt6207\_L1\_Tile\_rc|1  
GAGTATCCTCACCAGGATTAACATCAAACAGCGTGGCATTTCAGTGTCATTAAGCTTGT  
>HPV71\_Alpha\_12084981\_nt6222\_L1\_Tile\_rc|2  
TAGAAACATTATCCCGAGTATCCTCACCAGGATTAACATCAAACAGCGTGGCATTTCAG  
>HPV71\_Alpha\_12084981\_nt6322\_L1\_Tile\_rc|2  
GCGGCAGCTGAAGCGCCACTGCATGGAGTACCTTTTGCCCAATGTTTCACCTAAGGGAGGC  
>HPV71\_Alpha\_12084981\_nt6347\_L1\_Tile\_rc|1  
AAGTTCAAGTGGGGGGCAACTACCAGCGGCAGCTGAAGCGCCACTGCATGGAGTACCTTT  
>HPV71\_Alpha\_12084981\_nt6352\_L1\_Tile\_rc|1  
CTGGCAAGTTCAAGTGGGGGGCAACTACCAGCGGCAGCTGAAGCGCCACTGCATGGAGTA  
>HPV71\_Alpha\_12084981\_nt6442\_L1\_Tile\_rc|2  
AAGGGAACGTCAGACCTATTTGTTTGCAGGGCTGCAAAATCCATTGCCCCAAAACCTGTG



>HPV71\_Alpha\_12084981\_nt6452\_L1\_Tile\_rc|1  
AACAAATATCCAAGGGAACGTCAGACCTATTTGTTTGCAGGGCTGCAAAATCCATTGCCCC  
>HPV71\_Alpha\_12084981\_nt6467\_L1\_Tile\_rc|1  
TTTACATGTTGTAGTAACAATATCCAAGGGAACGTCAGACCTATTTGTTTGCAGGGCTGC  
>HPV71\_Alpha\_12084981\_nt6517\_L1\_Tile\_rc|1  
AAAAACATGCGATCACCAATGGCTCTGCAGCCATTTCGAAATAATCTGATATTTACATGTT  
>HPV71\_Alpha\_12084981\_nt6522\_L1\_Tile\_rc|2  
GCAAGAAAAACATGCGATCACCAATGGCTCTGCAGCCATTTCGAAATAATCTGATATTTAC  
>HPV71\_Alpha\_12084981\_nt6532\_L1\_Tile\_rc|1  
TGCTCTCGGCGCAAGAAAAACATGCGATCACCAATGGCTCTGCAGCCATTTCGAAATAATC  
>HPV71\_Alpha\_12084981\_nt6547\_L1\_Tile\_rc|1  
AATGTCTTAAACATTGCTCTCGGCGCAAGAAAAACATGCGATCACCAATGGCTCTGCAG  
>HPV71\_Alpha\_12084981\_nt6552\_L1\_Tile\_rc|1  
TATAAAATGTCTTAAACATTGCTCTCGGCGCAAGAAAAACATGCGATCACCAATGGCTC  
>HPV71\_Alpha\_12084981\_nt6592\_L1\_Tile\_rc|1  
TAATAGTCATCAGGAACCCCTGCCTAGGTGTGCCTGCCTATTATAAAATGTCTTAAACAT  
>HPV71\_Alpha\_12084981\_nt6602\_L1\_Tile\_rc|2  
AACCTTTAAATAATAGTCATCAGGAACCCCTGCCTAGGTGTGCCTGCCTATTATAAAATGT  
>HPV71\_Alpha\_12084981\_nt6607\_L1\_Tile\_rc|1  
AGGTGAACCTTTAAATAATAGTCATCAGGAACCCCTGCCTAGGTGTGCCTGCCTATTATAA  
>HPV71\_Alpha\_12084981\_nt6617\_L1\_Tile\_rc|1  
GAAAGGTAGAAGGTGAACCTTTAAATAATAGTCATCAGGAACCCCTGCCTAGGTGTGCCTG  
>HPV71\_Alpha\_12084981\_nt6632\_L1\_Tile\_rc|1  
TTGTAGGGGAAGCACGAAAGGTAGAAGGTGAACCTTTAAATAATAGTCATCAGGAACCCCT  
>HPV71\_Alpha\_12084981\_nt6637\_L1\_Tile\_rc|1  
AGAGCTTGTAGGGGAAGCACGAAAGGTAGAAGGTGAACCTTTAAATAATAGTCATCAGGA  
>HPV71\_Alpha\_12084981\_nt6642\_L1\_Tile\_rc|2  
TAAAGAGAGCTTGTAGGGGAAGCACGAAAGGTAGAAGGTGAACCTTTAAATAATAGTCAT  
>HPV71\_Alpha\_12084981\_nt6647\_L1\_Tile\_rc|1  
ATGCATAAAGAGAGCTTGTAGGGGAAGCACGAAAGGTAGAAGGTGAACCTTTAAATAATA  
>HPV71\_Alpha\_12084981\_nt6657\_L1\_Tile\_rc|1  
CTAGGTGTGGATGCATAAAGAGAGCTTGTAGGGGAAGCACGAAAGGTAGAAGGTGAACCT  
>HPV71\_Alpha\_12084981\_nt6777\_L1\_Tile\_rc|1  
ATGTGTCACAACCTGTTACAAAAGCAGATTGCCCAACAAATGCCATTGTTTGTGCCCTGT  
>HPV71\_Alpha\_12084981\_nt6782\_L1\_Tile\_rc|2  
ACGTGATGTGTCACAACCTGTTACAAAAGCAGATTGCCCAACAAATGCCATTGTTTGTGC  
>HPV71\_Alpha\_12084981\_nt6787\_L1\_Tile\_rc|1  
GTACTACGTGATGTGTCACAACCTGTTACAAAAGCAGATTGCCCAACAAATGCCATTGTT  
>HPV71\_Alpha\_12084981\_nt6792\_L1\_Tile\_rc|1  
TATTTGTACTACGTGATGTGTCACAACCTGTTACAAAAGCAGATTGCCCAACAAATGCCA  
>HPV71\_Alpha\_12084981\_nt6802\_L1\_Tile\_rc|2  
CAGATGGACATATTTGTACTACGTGATGTGTCACAACCTGTTACAAAAGCAGATTGCCCA  
>HPV71\_Alpha\_12084981\_nt6807\_L1\_Tile\_rc|1  
TAGCACAGATGGACATATTTGTACTACGTGATGTGTCACAACCTGTTACAAAAGCAGATT  
>HPV71\_Alpha\_12084981\_nt6812\_L1\_Tile\_rc|1  
TTTGGTAGCACAGATGGACATATTTGTACTACGTGATGTGTCACAACCTGTTACAAAAGC  
>HPV71\_Alpha\_12084981\_nt6817\_L1\_Tile\_rc|1  
ACAGTTTTGGTAGCACAGATGGACATATTTGTACTACGTGATGTGTCACAACCTGTTACAA  
>HPV71\_Alpha\_12084981\_nt6822\_L1\_Tile\_rc|2  
ACTCAACAGTTTTGGTAGCACAGATGGACATATTTGTACTACGTGATGTGTCACAACCTGT  
>HPV71\_Alpha\_12084981\_nt6827\_L1\_Tile\_rc|1  
TGTAGACTCAACAGTTTTGGTAGCACAGATGGACATATTTGTACTACGTGATGTGTCACA  
>HPV71\_Alpha\_12084981\_nt6832\_L1\_Tile\_rc|1  
TTATATGTAGACTCAACAGTTTTGGTAGCACAGATGGACATATTTGTACTACGTGATGTG  
>HPV71\_Alpha\_12084981\_nt6837\_L1\_Tile\_rc|1

AGGCTTTTATATGTAGACTCAACAGTTTTGGTAGCACAGATGGACATATTTGTACTACGTG  
>HPV71\_Alpha\_12084981\_nt6852\_L1\_Tile\_rc|1  
ATTCCATGAAACTAGAGGCTTTATATGTAGACTCAACAGTTTTGGTAGCACAGATGGACA  
>HPV71\_Alpha\_12084981\_nt6857\_L1\_Tile\_rc|1  
CAAATATTCCATGAAACTAGAGGCTTTATATGTAGACTCAACAGTTTTGGTAGCACAGAT  
>HPV71\_Alpha\_12084981\_nt6862\_L1\_Tile\_rc|2  
TGTCTCAAATATTCCATGAAACTAGAGGCTTTATATGTAGACTCAACAGTTTTGGTAGCA  
>HPV71\_Alpha\_12084981\_nt6867\_L1\_Tile\_rc|1  
CTCCATGTCTCAAATATTCCATGAAACTAGAGGCTTTATATGTAGACTCAACAGTTTTGG  
>HPV71\_Alpha\_12084981\_nt6872\_L1\_Tile\_rc|1  
TTCTTCTCCATGTCTCAAATATTCCATGAAACTAGAGGCTTTATATGTAGACTCAACAGT  
>HPV71\_Alpha\_12084981\_nt6882\_L1\_Tile\_rc|2  
GCAAATCAAATCTTCTCCATGTCTCAAATATTCCATGAAACTAGAGGCTTTATATGTAG  
>HPV71\_Alpha\_12084981\_nt6887\_L1\_Tile\_rc|1  
AAATTGCAAATCAAATCTTCTCCATGTCTCAAATATTCCATGAAACTAGAGGCTTTATA  
>HPV71\_Alpha\_12084981\_nt6967\_L1\_Tile\_rc|1  
TCCTCCAGTAATGTAGCATCCATGCCATGTAAGTAGGCCATAATTTTCAGCTGTTAAATTA  
>HPV71\_Alpha\_12084981\_nt7092\_L1\_Tile\_rc|1  
CATAGGGGTCTTTTTTCTGCAGGAGGAGGACTGTTTTTCTGACAGGTTATGGCCTGAG  
>HPV71\_Alpha\_12084981\_nt7102\_L1\_Tile\_rc|2  
GTAAGATCTGCATAGGGGTCTTTTTTCTGCAGGAGGAGGACTGTTTTTCTGACAGGTT  
>HPV71\_Alpha\_12084981\_nt7107\_L1\_Tile\_rc|1  
AAAATGTAAGATCTGCATAGGGGTCTTTTTTCTGCAGGAGGAGGACTGTTTTTCTGAC  
>HPV71\_Alpha\_12084981\_nt7237\_L1\_Tile\_rc|1  
GTAGATGCTGCAACCCTTTTACGGGACAATGCAGTAGGCCGCGAGCGGGTGCCACTTTGC  
>HPV71\_Alpha\_12084981\_nt7257\_L1\_Tile\_rc|1  
GTTTGGGGGCGGTGGATGTGGTAGATGCTGCAACCCTTTTACGGGACAATGCAGTAGGCC  
>HPV72\_Alpha\_1491683\_nt5899\_L1\_Tile\_rc|1  
CTGTCCGTTGAGAGGTATGGCACAGTAAGGATGTCCTACAGTTAGTAGACGAGAACTGCC  
>HPV72\_Alpha\_1491683\_nt5909\_L1\_Tile\_rc|1  
TTTTTTTTGCCCTGTCCGTTGAGAGGTATGGCACAGTAAGGATGTCCTACAGTTAGTAGAC  
>HPV72\_Alpha\_1491683\_nt5914\_L1\_Tile\_rc|1  
GGTGTTTTTTTTGCCCTGTCCGTTGAGAGGTATGGCACAGTAAGGATGTCCTACAGTTAG  
>HPV72\_Alpha\_1491683\_nt5919\_L1\_Tile\_rc|1  
GGAATGGTGTTTTTTTTTGCCCTGTCCGTTGAGAGGTATGGCACAGTAAGGATGTCCTACA  
>HPV72\_Alpha\_1491683\_nt6184\_L1\_Tile\_rc|1  
TTTGTAGTCAACAGATACATTGTCCCGACTGTCAGAATTGTCAGCCACAAGTAAGGAAGT  
>HPV72\_Alpha\_1491683\_nt6219\_L1\_Tile\_rc|1  
GGAGGCTTGACCCTATAATAAGCAATTGGGTCTGTTTGTAGTCAACAGATACATTGTCC  
>HPV72\_Alpha\_1491683\_nt6229\_L1\_Tile\_rc|1  
CTCACCAATGGGAGGCTTGACCCTATAATAAGCAATTGGGTCTGTTTGTAGTCAACAGA  
>HPV72\_Alpha\_1491683\_nt6234\_L1\_Tile\_rc|1  
CAATGCTCACCAATGGGAGGCTTGACCCTATAATAAGCAATTGGGTCTGTTTGTAGTCA  
>HPV72\_Alpha\_1491683\_nt6269\_L1\_Tile\_rc|1  
GAGAATTAGAGCCTGCACAAGGAGTGCCCTTGGTCCAATGCTCACCAATGGGAGGCTTGC  
>HPV72\_Alpha\_1491683\_nt6279\_L1\_Tile\_rc|1  
TCAGTTGGCTGAGAATTAGAGCCTGCACAAGGAGTGCCCTTGGTCCAATGCTCACCAATG  
>HPV72\_Alpha\_1491683\_nt6284\_L1\_Tile\_rc|1  
GGCAGTCAGTTGGCTGAGAATTAGAGCCTGCACAAGGAGTGCCCTTGGTCCAATGCTCAC  
>HPV72\_Alpha\_1491683\_nt6314\_L1\_Tile\_rc|1  
GTATAGTGGAATTTGTAAATTCTAAAGGGGGCAGTCAGTTGGCTGAGAATTAGAGCCTG  
>HPV72\_Alpha\_1491683\_nt6564\_L1\_Tile\_rc|1  
CCTTTAAGATATAAACTGGCTGGTAGTGCCTCACCCATTGTGCCCTGCCTATTAAAAAAA  
>HPV72\_Alpha\_1491683\_nt6569\_L1\_Tile\_rc|1  
AGGCACCTTTAAGATATAAACTGGCTGGTAGTGCCTCACCCATTGTGCCCTGCCTATTAA

>HPV72\_Alpha\_1491683\_nt6574\_L1\_Tile\_rc|1  
ACCCGAGGCACCTTTAAGATATAAACTGGCTGGTAGTGCCTCACCCATTGTGCCCTGCCT  
>HPV72\_Alpha\_1491683\_nt6579\_L1\_Tile\_rc|1  
TCGCTACCCGAGGCACCTTTAAGATATAAACTGGCTGGTAGTGCCTCACCCATTGTGCCC  
>HPV72\_Alpha\_1491683\_nt6584\_L1\_Tile\_rc|1  
CCCTGTCTCGCTACCCGAGGCACCTTTAAGATATAAACTGGCTGGTAGTGCCTCACCCATTG  
>HPV72\_Alpha\_1491683\_nt6589\_L1\_Tile\_rc|1  
TGTCACCCCTGTCTCGCTACCCGAGGCACCTTTAAGATATAAACTGGCTGGTAGTGCCTCACC  
>HPV72\_Alpha\_1491683\_nt6614\_L1\_Tile\_rc|1  
TGGGAGAATAAAATATAACTACCAGGTGTCACCCTGTCTCGCTACCCGAGGCACCTTTAAGAT  
>HPV72\_Alpha\_1491683\_nt6624\_L1\_Tile\_rc|1  
CCGCTGGGGGTGGGAGAATAAAATATAACTACCAGGTGTCACCCTGTCTCGCTACCCGAGGCA  
>HPV72\_Alpha\_1491683\_nt6629\_L1\_Tile\_rc|1  
TAGAGCCGCTGGGGGTGGGAGAATAAAATATAACTACCAGGTGTCACCCTGTCTCGCTACCCG  
>HPV72\_Alpha\_1491683\_nt6809\_L1\_Tile\_rc|1  
TAGAAGCTGTATATTCTGATACAGAGGACGCTGTGGCAGTACAAATAGTTACATTAGTAC  
>HPV72\_Alpha\_1491683\_nt6814\_L1\_Tile\_rc|1  
AAAATTAGAAGCTGTATATTCTGATACAGAGGACGCTGTGGCAGTACAAATAGTTACATT  
>HPV72\_Alpha\_1491683\_nt6819\_L1\_Tile\_rc|1  
TCACGAAAATTAGAAGCTGTATATTCTGATACAGAGGACGCTGTGGCAGTACAAATAGTT  
>HPV72\_Alpha\_1491683\_nt6824\_L1\_Tile\_rc|1  
GATACTCACGAAAATTAGAAGCTGTATATTCTGATACAGAGGACGCTGTGGCAGTACAAA  
>HPV72\_Alpha\_1491683\_nt6844\_L1\_Tile\_rc|1  
AAATTCTCAGTGTGGCGAAGATACTCACGAAAATTAGAAGCTGTATATTCTGATACAGA  
>HPV72\_Alpha\_1491683\_nt7069\_L1\_Tile\_rc|1  
TAAGTTAGCATATGGATCTTCTTTAGGAGGAGGGGTGGCAGCCCCCTTTTGACAGGTAAT  
>HPV73\_Alpha\_1491692\_nt5595\_L1\_Tile\_rc|1  
GAGAATCCTTGATAGGAAAATATGGGTGTCCACAGCCAACAAACGTGTGCTACCTGCAT  
>HPV73\_Alpha\_1491692\_nt5600\_L1\_Tile\_rc|1  
TTTTTTGAGAATCCTTGATAGGAAAATATGGGTGTCCACAGCCAACAAACGTGTGCTACC  
>HPV73\_Alpha\_1491692\_nt5610\_L1\_Tile\_rc|1  
TGGTTTTACGTTTTTGAGAATCCTTGATAGGAAAATATGGGTGTCCACAGCCAACAAAC  
>HPV73\_Alpha\_1491692\_nt5620\_L1\_Tile\_rc|1  
TTAGGAACATATGGTTTTACGTTTTTGAGAATCCTTGATAGGAAAATATGGGTGTCCACA  
>HPV73\_Alpha\_1491692\_nt5625\_L1\_Tile\_rc|1  
AAACTTTAGGAACATATGGTTTTACGTTTTTGAGAATCCTTGATAGGAAAATATGGGTGTC  
>HPV73\_Alpha\_1491692\_nt5630\_L1\_Tile\_rc|1  
ACCTGAAACTTTAGGAACATATGGTTTTACGTTTTTGAGAATCCTTGATAGGAAAATATGG  
>HPV73\_Alpha\_1491692\_nt5850\_L1\_Tile\_rc|1  
TATTTTGTCCAGCAATGTATTTAGGAGCATTTTCAGTATCATCTAATTTATTCATAAATG  
>HPV73\_Alpha\_1491692\_nt5860\_L1\_Tile\_rc|1  
CTACCATCTGTATTTTGTCCAGCAATGTATTTAGGAGCATTTTCAGTATCATCTAATTTA  
>HPV73\_Alpha\_1491692\_nt5865\_L1\_Tile\_rc|1  
ATTCTCTACCATCTGTATTTTGTCCAGCAATGTATTTAGGAGCATTTTCAGTATCATCTA  
>HPV73\_Alpha\_1491692\_nt5870\_L1\_Tile\_rc|1  
CATACATTCTCTACCATCTGTATTTTGTCCAGCAATGTATTTAGGAGCATTTTCAGTATC  
>HPV73\_Alpha\_1491692\_nt5875\_L1\_Tile\_rc|1  
ACTGACATACATTCTCTACCATCTGTATTTTGTCCAGCAATGTATTTAGGAGCATTTTCA  
>HPV73\_Alpha\_1491692\_nt5880\_L1\_Tile\_rc|1  
AATCCACTGACATACATTCTCTACCATCTGTATTTTGTCCAGCAATGTATTTAGGAGCAT  
>HPV73\_Alpha\_1491692\_nt5885\_L1\_Tile\_rc|1  
TTTATAATCCACTGACATACATTCTCTACCATCTGTATTTTGTCCAGCAATGTATTTAGG  
>HPV73\_Alpha\_1491692\_nt6010\_L1\_Tile\_rc|1  
GGGGTGTCTTTAATTCAGTGGGGGACAATCACCAGTATTAACAGTTTGTGAAGTACAT  
>HPV73\_Alpha\_1491692\_nt6015\_L1\_Tile\_rc|1

GTATAGGGGTGTTCTTTAATTCCAGTGGGGGACAATCACCAGTATTAACAGTTTGTGAAG  
>HPV73\_Alpha\_1491692\_nt6255\_L1\_Tile\_rc|1  
TTAGGTCATCTGGGATTTTATCACCAGGTATCACCAGCCCTGTTAAATAAGTGTCGAACAA  
>HPV73\_Alpha\_1491692\_nt6265\_L1\_Tile\_rc|1  
CCTTTAATCATTAGGTCATCTGGGATTTTATCACCAGGTATCACCAGCCCTGTTAAATAAG  
>HPV73\_Alpha\_1491692\_nt6285\_L1\_Tile\_rc|1  
GTGTTGCAGTATTGCCTGTGCCTTTAATCATTAGGTCATCTGGGATTTTATCACCAGGTAT  
>HPV73\_Alpha\_1491692\_nt6495\_L1\_Tile\_rc|1  
TTGTAGTAGAGCTACTAGCCTGTGTACCTACACATACAGAAAAATTAGTGCTTCTAGTAG  
>HPV73\_Alpha\_1491692\_nt6500\_L1\_Tile\_rc|1  
ATACGTTGTAGTAGAGCTACTAGCCTGTGTACCTACACATACAGAAAAATTAGTGCTTCT  
>HPV73\_Alpha\_1491692\_nt6505\_L1\_Tile\_rc|1  
TTGGCATACGTTGTAGTAGAGCTACTAGCCTGTGTACCTACACATACAGAAAAATTAGTG  
>HPV73\_Alpha\_1491692\_nt6510\_L1\_Tile\_rc|1  
TAGAGTTGGCATACGTTGTAGTAGAGCTACTAGCCTGTGTACCTACACATACAGAAAAAT  
>HPV73\_Alpha\_1491692\_nt6515\_L1\_Tile\_rc|1  
AAAATTAGAGTTGGCATACGTTGTAGTAGAGCTACTAGCCTGTGTACCTACACATACAGA  
>HPV73\_Alpha\_1491692\_nt6520\_L1\_Tile\_rc|1  
TCCTTAAATTAGAGTTGGCATACGTTGTAGTAGAGCTACTAGCCTGTGTACCTACACAT  
>HPV73\_Alpha\_1491692\_nt6525\_L1\_Tile\_rc|1  
AATATTCCTTAAATTAGAGTTGGCATACGTTGTAGTAGAGCTACTAGCCTGTGTACCTA  
>HPV73\_Alpha\_1491692\_nt6920\_L1\_Tile\_rc|1  
AGGTGTGGCACTTGTGGTAGCAGATGCAGAACGTTTAGAAGCTTGTAACCTAGGACGTGC  
>HPV73\_Alpha\_1491692\_nt6925\_L1\_Tile\_rc|1  
TTCTTAGGTGTGGCACTTGTGGTAGCAGATGCAGAACGTTTAGAAGCTTGTAACCTAGGA  
>HPV74\_Alpha\_27462483\_nt5714\_L1\_Tile\_rc|1  
TTAGGAACAACCTGTTTTGTAACTGTTTTATAGGGAAATAGGGATTTTCCTACAGCAAGT  
>HPV74\_Alpha\_27462483\_nt5719\_L1\_Tile\_rc|1  
ACACTTTAGGAACAACCTGTTTTGTAACTGTTTTATAGGGAAATAGGGATTTTCCTACAG  
>HPV74\_Alpha\_27462483\_nt5724\_L1\_Tile\_rc|1  
TCCAGACACTTTAGGAACAACCTGTTTTGTAACTGTTTTATAGGGAAATAGGGATTTCC  
>HPV74\_Alpha\_27462483\_nt6099\_L1\_Tile\_rc|1  
AGTAATTAATTCTAATGCAGGGCAATCGCCTGGCTTTACAGTAACATTAGAACATTGCTT  
>HPV74\_Alpha\_27462483\_nt6104\_L1\_Tile\_rc|1  
ACACTAGTAATTAATTCTAATGCAGGGCAATCGCCTGGCTTTACAGTAACATTAGAACAT  
>HPV74\_Alpha\_27462483\_nt6109\_L1\_Tile\_rc|1  
GAATTACACTAGTAATTAATTCTAATGCAGGGCAATCGCCTGGCTTTACAGTAACATTAG  
>HPV74\_Alpha\_27462483\_nt6374\_L1\_Tile\_rc|1  
GTACCACGTGTAGTACCCTTAATATATAGGTCCTGGGGAATGTCTCACCCTGTTCCA  
>HPV74\_Alpha\_27462483\_nt6399\_L1\_Tile\_rc|1  
ATTAAAGTAAATAGCATTGGCAAGTGTAACACGTGTAGTACCCTTAATATATAGGTCCTG  
>HPV74\_Alpha\_27462483\_nt6404\_L1\_Tile\_rc|1  
GGGGTATTAAAGTAAATAGCATTGGCAAGTGTAACACGTGTAGTACCCTTAATATATAGG  
>HPV74\_Alpha\_27462483\_nt6594\_L1\_Tile\_rc|1  
AGTATATGTAGCAGCAGGAGGGGATTGTGTAGTAGGCGCACACACTGTCATGTTAGTACT  
>HPV74\_Alpha\_27462483\_nt6599\_L1\_Tile\_rc|1  
GTACTAGTATATGTAGCAGCAGGAGGGGATTGTGTAGTAGGCGCACACACTGTCATGTTA  
>HPV74\_Alpha\_27462483\_nt6604\_L1\_Tile\_rc|1  
AGTCTGTACTAGTATATGTAGCAGCAGGAGGGGATTGTGTAGTAGGCGCACACACTGTCA  
>HPV74\_Alpha\_27462483\_nt6609\_L1\_Tile\_rc|1  
TTTGTAGTCTGTACTAGTATATGTAGCAGCAGGAGGGGATTGTGTAGTAGGCGCACACAC  
>HPV74\_Alpha\_27462483\_nt6619\_L1\_Tile\_rc|1  
TCATGTATTGTTGTAGTCTGTACTAGTATATGTAGCAGCAGGAGGGGATTGTGTAGTAG  
>HPV74\_Alpha\_27462483\_nt6624\_L1\_Tile\_rc|1  
ATGTCTCATGTATTGTTGTAGTCTGTACTAGTATATGTAGCAGCAGGAGGGGATTGTGT

>HPV74\_Alpha\_27462483\_nt7014\_L1\_Tile\_rc|1  
AGTGGTTGAGGAGGGGGCTGTAGGGGCCGAACGCTTTTTACCTACACGAACCGAAGAGCG  
>HPV74\_Alpha\_27462483\_nt7029\_L1\_Tile\_rc|1  
AGAGCGTTTCTGTTTAGTGGTTGAGGAGGGGGCTGTAGGGGCCGAACGCTTTTTACCTAC  
>HPV74\_Alpha\_27462483\_nt7034\_L1\_Tile\_rc|1  
TTCCTAGAGCGTTTCTGTTTAGTGGTTGAGGAGGGGGCTGTAGGGGCCGAACGCTTTTTTA  
>HPV74\_Alpha\_27462483\_nt7041\_L1\_Tile\_rc|1  
CTATCGTTTCTCTAGAGCGTTTCTGTTTAGTGGTTGAGGAGGGGGCTGTAGGGGCCGAACG  
>HPV75\_Beta\_2911544\_nt6142\_L1\_Tile\_rc|2  
CTTTAGACATTGTTATATAATTATTTGAATTTTCAGTATCCTTTACTTTATTGAACAAAG  
>HPV75\_Beta\_2911544\_nt7112\_L1\_Tile\_rc|1  
GATAATTTTTCAGTTAGATCCACAGGCCAGAAAGTATATTGCTCATAAGGATCTTTCTTT  
>HPV75\_Beta\_2911544\_nt7122\_L1\_Tile\_rc|2  
CAAATCCAACGATAATTTTTCAGTTAGATCCACAGGCCAGAAAGTATATTGCTCATAAGG  
>HPV75\_Beta\_2911544\_nt7187\_L1\_Tile\_rc|1  
GTTACCTTGGAAGCCCTTCGTAAGCCTGCCTGAAAAAGGAATTTGCGTCCTAACGAGTAT  
>HPV75\_Beta\_2911544\_nt7192\_L1\_Tile\_rc|1  
TTCTGGTTACCTTGGAAGCCCTTCGTAAGCCTGCCTGAAAAAGGAATTTGCGTCCTAACG  
>HPV76\_Beta\_2911551\_nt6035\_L1\_Tile\_rc|1  
CCTTCTCAGGATTATAGACATTCATGTCTACCAAGGCGAATCTATTGGGATCTGGTAGTA  
>HPV76\_Beta\_2911551\_nt6045\_L1\_Tile\_rc|1  
ACCAGTCTTTCCTTCTCAGGATTATAGACATTCATGTCTACCAAGGCGAATCTATTGGGA  
>HPV76\_Beta\_2911551\_nt6050\_L1\_Tile\_rc|1  
CCCAAACAGTCTTTCCTTCTCAGGATTATAGACATTCATGTCTACCAAGGCGAATCTAT  
>HPV76\_Beta\_2911551\_nt6330\_L1\_Tile\_rc|1  
TCTATTACAGTATTTACCAGTTCCAAAGGTGGACATTTGCCTACCCCTCTGTCAGCATCA  
>HPV76\_Beta\_2911551\_nt6335\_L1\_Tile\_rc|1  
CATCTTCTATTACAGTATTTACCAGTTCCAAAGGTGGACATTTGCCTACCCCTCTGTCAG  
>HPV76\_Beta\_2911551\_nt6340\_L1\_Tile\_rc|1  
ATCTCCATCTTCTATTACAGTATTTACCAGTTCCAAAGGTGGACATTTGCCTACCCCTCT  
>HPV76\_Beta\_2911551\_nt7145\_L1\_Tile\_rc|1  
CTAATGACAATTTCTCAGTTAGATCCACTTGCCAAAAAATTGTATTGCTCATATGGATCCT  
>HPV76\_Beta\_2911551\_nt7150\_L1\_Tile\_rc|1  
CAAATCTAATGACAATTTCTCAGTTAGATCCACTTGCCAAAAAATTGTATTGCTCATATGG  
>HPV76\_Beta\_2911551\_nt7215\_L1\_Tile\_rc|1  
GATACTCTGGAAGCCCGTCGCAGGCCTGCTTGAAACAGAACTTGCGTCCTAAGGAATAT  
>HPV77\_Alpha\_2911558\_nt5914\_L1\_Tile\_rc|1  
CATCCACCTTAGTACCAGAAGTTTTGGGAATAGCAAAATAGGGATGACCTACAGTTAACA  
>HPV77\_Alpha\_2911558\_nt6284\_L1\_Tile\_rc|1  
CAGTCTCCTGGGGTAGTATTAGTACGTGCACAAGGGGTACCCTTACCCCAGTATTCCCCC  
>HPV77\_Alpha\_2911558\_nt6289\_L1\_Tile\_rc|1  
GAGGACAGTCTCCTGGGGTAGTATTAGTACGTGCACAAGGGGTACCCTTACCCCAGTATT  
>HPV77\_Alpha\_2911558\_nt6304\_L1\_Tile\_rc|1  
TCATTAACCTCCAAGGGAGGACAGTCTCCTGGGGTAGTATTAGTACGTGCACAAGGGGTAC  
>HPV77\_Alpha\_2911558\_nt6309\_L1\_Tile\_rc|1  
AGATGTCATTAACCTCCAAGGGAGGACAGTCTCCTGGGGTAGTATTAGTACGTGCACAAGG  
>HPV77\_Alpha\_2911558\_nt6319\_L1\_Tile\_rc|1  
CCTGAATATAAGATGTCATTAACCTCCAAGGGAGGACAGTCTCCTGGGGTAGTATTAGTAC  
>HPV77\_Alpha\_2911558\_nt6564\_L1\_Tile\_rc|1  
TTTGAGGTACAAAGATTCTGGAATTTTGTCTCCAACATCACCCGCACGATTGAAAAAGTG  
>HPV77\_Alpha\_2911558\_nt6569\_L1\_Tile\_rc|1  
CTCCCTTTGAGGTACAAAGATTCTGGAATTTTGTCTCCAACATCACCCGCACGATTGAAA  
>HPV77\_Alpha\_2911558\_nt6574\_L1\_Tile\_rc|1  
CGCTACTCCCTTTGAGGTACAAAGATTCTGGAATTTTGTCTCCAACATCACCCGCACGAT  
>HPV77\_Alpha\_2911558\_nt6579\_L1\_Tile\_rc|1

ACGCCCCGCTACTCCCTTTGAGGTACAAAGATTCTGGAATTTTGTCTCCAACATCACCCGC  
>HPV77\_Alpha\_2911558\_nt6584\_L1\_Tile\_rc|1  
GTCTCAGCCCCGCTACTCCCTTTGAGGTACAAAGATTCTGGAATTTTGTCTCCAACATCA  
>HPV77\_Alpha\_2911558\_nt6589\_L1\_Tile\_rc|1  
CGGGAGTCTCAGCCCCGCTACTCCCTTTGAGGTACAAAGATTCTGGAATTTTGTCTCCAA  
>HPV77\_Alpha\_2911558\_nt6594\_L1\_Tile\_rc|1  
ACTGCCGGGAGTCTCAGCCCCGCTACTCCCTTTGAGGTACAAAGATTCTGGAATTTTGTCT  
>HPV77\_Alpha\_2911558\_nt6599\_L1\_Tile\_rc|1  
ATAGCACTGCCGGGAGTCTCAGCCCCGCTACTCCCTTTGAGGTACAAAGATTCTGGAATT  
>HPV77\_Alpha\_2911558\_nt6604\_L1\_Tile\_rc|1  
TGTATATAGCACTGCCGGGAGTCTCAGCCCCGCTACTCCCTTTGAGGTACAAAGATTCTG  
>HPV77\_Alpha\_2911558\_nt6804\_L1\_Tile\_rc|1  
GGCATCATAGGTAGATGGGGTTTGAGACTCAGTGGAGGCACTGAGAGACATATTTGTGCT  
>HPV77\_Alpha\_2911558\_nt6809\_L1\_Tile\_rc|1  
TTAGTGGCATCATAGGTAGATGGGGTTTGAGACTCAGTGGAGGCACTGAGAGACATATTT  
>HPV77\_Alpha\_2911558\_nt6814\_L1\_Tile\_rc|1  
TTATTTTAGTGGCATCATAGGTAGATGGGGTTTGAGACTCAGTGGAGGCACTGAGAGACA  
>HPV77\_Alpha\_2911558\_nt6819\_L1\_Tile\_rc|1  
TTCCTTTATTTAGTGGCATCATAGGTAGATGGGGTTTGAGACTCAGTGGAGGCACTGAG  
>HPV77\_Alpha\_2911558\_nt7229\_L1\_Tile\_rc|1  
CGCTTCCGTTTGGTCTGAAGCTGGGGAGGGGTGGGCGCCCGCGTTTGCAGAGAGGGAACC  
>HPV77\_Alpha\_2911558\_nt7242\_L1\_Tile\_rc|2  
TCACTTTTTTGGAGCGCTTCCGTTTGGTCTGAAGCTGGGGAGGGGGTGGGCGCCCGCGTTT  
>HPV80\_Beta\_2911565\_nt6084\_L1\_Tile\_rc|1  
TCAGTAGAACCTCCCTGGTAGCCACTATTATTTTCTGTGTCCTTAACTTTATTAAATAAA  
>HPV80\_Beta\_2911565\_nt6089\_L1\_Tile\_rc|1  
TGTCATCAGTAGAACCTCCCTGGTAGCCACTATTATTTTCTGTGTCCTTAACTTTATTAA  
>HPV80\_Beta\_2911565\_nt6094\_L1\_Tile\_rc|1  
CTGTCTGTTCATCAGTAGAACCTCCCTGGTAGCCACTATTATTTTCTGTGTCCTTAACTTT  
>HPV80\_Beta\_2911565\_nt6099\_L1\_Tile\_rc|1  
GTATTCTGTCTGTTCATCAGTAGAACCTCCCTGGTAGCCACTATTATTTTCTGTGTCCTTA  
>HPV80\_Beta\_2911565\_nt6249\_L1\_Tile\_rc|1  
TCAATCAGTATTTTTTAAGTTCTAATGGAGGACATTTTCCAGCTTGTTATTTTCTTCT  
>HPV80\_Beta\_2911565\_nt6579\_L1\_Tile\_rc|1  
CCACTAACAGTAGGAAAATATGTGGAATTTGCTAAAACACGTTGTTGCTGGCCTGTTTGT  
>HPV80\_Beta\_2911565\_nt6589\_L1\_Tile\_rc|1  
TACTAAAGAGCCACTAACAGTAGGAAAATATGTGGAATTTGCTAAAACACGTTGTTGCTG  
>HPV80\_Beta\_2911565\_nt6594\_L1\_Tile\_rc|1  
GAAGTTACTAAAGAGCCACTAACAGTAGGAAAATATGTGGAATTTGCTAAAACACGTTGT  
>HPV80\_Beta\_2911565\_nt6734\_L1\_Tile\_rc|1  
CAGAAGTAACACTTATGGTGAAATTAGTGTTCCTTGTATTATCAGCAACAGTAATAAACA  
>HPV80\_Beta\_2911565\_nt6744\_L1\_Tile\_rc|1  
GTACTACCATCAGAAGTAACACTTATGGTGAAATTAGTGTTCCTTGTATTATCAGCAACA  
>HPV80\_Beta\_2911565\_nt6749\_L1\_Tile\_rc|1  
TTATAGTACTACCATCAGAAGTAACACTTATGGTGAAATTAGTGTTCCTTGTATTATCAG  
>HPV80\_Beta\_2911565\_nt6754\_L1\_Tile\_rc|1  
TTCAGTTATAGTACTACCATCAGAAGTAACACTTATGGTGAAATTAGTGTTCCTTGTATT  
>HPV80\_Beta\_2911565\_nt6769\_L1\_Tile\_rc|1  
ATTTTGTGTATTATATTACAGTTATAGTACTACCATCAGAAGTAACACTTATGGTGAAATT  
>HPV80\_Beta\_2911565\_nt6774\_L1\_Tile\_rc|1  
CTAATATTTTGTGTATTATATTACAGTTATAGTACTACCATCAGAAGTAACACTTATGGTG  
>HPV80\_Beta\_2911565\_nt7139\_L1\_Tile\_rc|1  
ATCTGATGGTTTTGGGACGTCTTTGTAAACCTGCCTGAAATATAAAATTTCCCTTCCTAAAG  
>HPV80\_Beta\_2911565\_nt7144\_L1\_Tile\_rc|1  
AGAAGATCTGATGGTTTTGGGACGTCTTTGTAAACCTGCCTGAAATATAAAATTTCCCTTC

>HPV80\_Beta\_2911565\_nt7149\_L1\_Tile\_rc|1  
TTTACAGAAGATCTGATGGTTTTGGGACGTCTTTGTAAACCTGCCTGAAATATAAATTTTC  
>HPV80\_Beta\_2911565\_nt7154\_L1\_Tile\_rc|1  
AAACTTTTACAGAAGATCTGATGGTTTTGGGACGTCTTTGTAAACCTGCCTGAAATATAA  
>HPV81\_Alpha\_40804509\_nt5775\_L1\_Tile\_rc|1  
TATGTTTTTTAGGGAAGAATATATAAGAAGGAAACAAGTAAAAATCAGTGCCAACAACAT  
>HPV81\_Alpha\_40804509\_nt5780\_L1\_Tile\_rc|1  
ACGTTTATGTTTTTTAGGGAAGAATATATAAGAAGGAAACAAGTAAAAATCAGTGCCAAC  
>HPV81\_Alpha\_40804509\_nt5985\_L1\_Tile\_rc|1  
AGTGGAAACGCTTTCCTTGGGTACCAATAGTTAATGTACAATATGGATGCCCTACAGTAAG  
>HPV81\_Alpha\_40804509\_nt5990\_L1\_Tile\_rc|1  
GGAATAGTGGAACGCTTTCCTTGGGTACCAATAGTTAATGTACAATATGGATGCCCTACA  
>HPV81\_Alpha\_40804509\_nt5995\_L1\_Tile\_rc|1  
CCTTGGGAATAGTGGAACGCTTTCCTTGGGTACCAATAGTTAATGTACAATATGGATGCC  
>HPV81\_Alpha\_40804509\_nt6275\_L1\_Tile\_rc|1  
ATAATTAATAATTGTGTTTGCTTATAATCAACTGAAATATTGTCACGACTGTCCTCACTG  
>HPV81\_Alpha\_40804509\_nt6355\_L1\_Tile\_rc|1  
GGCATTTCGTTTTGTGCTGGAGCAACATTAGCACAAAAGGTACCCCGGGCCAGTGCTCCC  
>HPV81\_Alpha\_40804509\_nt6370\_L1\_Tile\_rc|1  
TAAACTCCAAGGGGGGGCATTCGTTTTGTGCTGGAGCAACATTAGCACAAAAGGTACCCC  
>HPV81\_Alpha\_40804509\_nt6375\_L1\_Tile\_rc|1  
ATTTTTAAACTCCAAGGGGGGGCATTCGTTTTGTGCTGGAGCAACATTAGCACAAAAGGT  
>HPV81\_Alpha\_40804509\_nt6380\_L1\_Tile\_rc|1  
GTTGTATTTTTAAACTCCAAGGGGGGGCATTCGTTTTGTGCTGGAGCAACATTAGCACAA  
>HPV81\_Alpha\_40804509\_nt6675\_L1\_Tile\_rc|1  
AATATAACTCCCGGGGGTTATTCTGTCACTGCCTGCAGCACCCCTTCATATATAAGTCTGC  
>HPV81\_Alpha\_40804509\_nt6870\_L1\_Tile\_rc|1  
CTTGTATTCTGCAGCAGCAGATGTAGCTGTGCAAATAGTAAATTTGGTGCTTCTGGTAGT  
>HPV82\_Alpha\_6970427\_nt5927\_L1\_Tile\_rc|1  
GGTCGTTGCCATTGGCAAACCTAGAGTTTTTCAGTATCATCATACTTATTAAATAAAGGAT  
>HPV82\_Alpha\_6970427\_nt5932\_L1\_Tile\_rc|1  
CTGTTGGTTCGTTGCCATTGGCAAACCTAGAGTTTTTCAGTATCATCATACTTATTAAATAA  
>HPV82\_Alpha\_6970427\_nt5937\_L1\_Tile\_rc|1  
ACATCCTGTTGGTTCGTTGCCATTGGCAAACCTAGAGTTTTTCAGTATCATCATACTTATTA  
>HPV82\_Alpha\_6970427\_nt5942\_L1\_Tile\_rc|2  
CCCTAACATCCTGTTGGTTCGTTGCCATTGGCAAACCTAGAGTTTTTCAGTATCATCATACT  
>HPV82\_Alpha\_6970427\_nt5947\_L1\_Tile\_rc|1  
GTTGTCCCTAACATCCTGTTGGTTCGTTGCCATTGGCAAACCTAGAGTTTTTCAGTATCATC  
>HPV82\_Alpha\_6970427\_nt5952\_L1\_Tile\_rc|1  
GATATGTTGTCCCTAACATCCTGTTGGTTCGTTGCCATTGGCAAACCTAGAGTTTTTCAGTA  
>HPV82\_Alpha\_6970427\_nt5957\_L1\_Tile\_rc|1  
CCACAGATATGTTGTCCCTAACATCCTGTTGGTTCGTTGCCATTGGCAAACCTAGAGTTTT  
>HPV82\_Alpha\_6970427\_nt5962\_L1\_Tile\_rc|2  
GTTGTCCACAGATATGTTGTCCCTAACATCCTGTTGGTTCGTTGCCATTGGCAAACCTAGA  
>HPV82\_Alpha\_6970427\_nt6187\_L1\_Tile\_rc|1  
CTGAGCAATATCCAATGGAACATCTGATTTAGTAGCTTGTAATAGCAAAATCCATGGC  
>HPV82\_Alpha\_6970427\_nt6207\_L1\_Tile\_rc|1  
TCAGGGTATTTACACACAGACTGAGCAATATCCAATGGAACATCTGATTTAGTAGCTTGT  
>HPV82\_Alpha\_6970427\_nt6322\_L1\_Tile\_rc|2  
AATGGCATCACCACACACAGCCTTATTATAGTAATGCCTAGCAAATATTTGCTCCCT  
>HPV82\_Alpha\_6970427\_nt6327\_L1\_Tile\_rc|1  
TCTGGAATGGCATCACCACACACAGCCTTATTATAGTAATGCCTAGCAAATATTTGCTCCCT  
>HPV82\_Alpha\_6970427\_nt6337\_L1\_Tile\_rc|1  
ATAAGCCTTGCTGGAATGGCATCACCACACACAGCCTTATTATAGTAATGCCTAGC  
>HPV82\_Alpha\_6970427\_nt6352\_L1\_Tile\_rc|1

ACCAGTACCCTTAATATAAGCCTTGTCTGGAATGGCATCACCAACCACACCAGCCTTATT  
>HPV82\_Alpha\_6970427\_nt6372\_L1\_Tile\_rc|1  
CTAATAGGGTCGCGGCCAGCACCAGTACCCTTAATATAAGCCTTGTCTGGAATGGCATCA  
>HPV82\_Alpha\_6970427\_nt6562\_L1\_Tile\_rc|2  
TGGAGTAACAGCAGTGCTAATGGTTAAATTGGTACTTTTAGTAGTGTCAACACAAGTAAT  
>HPV82\_Alpha\_6970427\_nt6567\_L1\_Tile\_rc|1  
ACAGATGGAGTAACAGCAGTGCTAATGGTTAAATTGGTACTTTTAGTAGTGTCAACACAA  
>HPV82\_Alpha\_6970427\_nt6572\_L1\_Tile\_rc|1  
GTGCAACAGATGGAGTAACAGCAGTGCTAATGGTTAAATTGGTACTTTTAGTAGTGTCAA  
>HPV82\_Alpha\_6970427\_nt6577\_L1\_Tile\_rc|1  
TGTTTGTGCAACAGATGGAGTAACAGCAGTGCTAATGGTTAAATTGGTACTTTTAGTAGT  
>HPV82\_Alpha\_6970427\_nt6582\_L1\_Tile\_rc|2  
GTAAATGTTTGTGCAACAGATGGAGTAACAGCAGTGCTAATGGTTAAATTGGTACTTTTA  
>HPV82\_Alpha\_6970427\_nt6587\_L1\_Tile\_rc|1  
CTGGAGTAAATGTTTGTGCAACAGATGGAGTAACAGCAGTGCTAATGGTTAAATTGGTAC  
>HPV82\_Alpha\_6970427\_nt6592\_L1\_Tile\_rc|1  
GTTTGTCTGGAGTAAATGTTTGTGCAACAGATGGAGTAACAGCAGTGCTAATGGTTAAATT  
>HPV82\_Alpha\_6970427\_nt6597\_L1\_Tile\_rc|1  
TTAAAGTTTGTCTGGAGTAAATGTTTGTGCAACAGATGGAGTAACAGCAGTGCTAATGGTT  
>HPV82\_Alpha\_6970427\_nt6607\_L1\_Tile\_rc|1  
AATGTACTGCTTAAAGTTTGTCTGGAGTAAATGTTTGTGCAACAGATGGAGTAACAGCAGT  
>HPV82\_Alpha\_6970427\_nt6612\_L1\_Tile\_rc|1  
TGCCTAATGTACTGCTTAAAGTTTGTCTGGAGTAAATGTTTGTGCAACAGATGGAGTAACA  
>HPV82\_Alpha\_6970427\_nt6702\_L1\_Tile\_rc|2  
GAATCCATGGTGTGCAGGTAAGCCATAATTTTCAGTAGTTAAAGTGATTTTACACAATTGA  
>HPV82\_Alpha\_6970427\_nt6707\_L1\_Tile\_rc|1  
TTGTAGAATCCATGGTGTGCAGGTAAGCCATAATTTTCAGTAGTTAAAGTGATTTTACACA  
>HPV82\_Alpha\_6970427\_nt6712\_L1\_Tile\_rc|1  
TAAATTTGTAGAATCCATGGTGTGCAGGTAAGCCATAATTTTCAGTAGTTAAAGTGATTTT  
>HPV82\_Alpha\_6970427\_nt6717\_L1\_Tile\_rc|1  
TGTTCTAAAATTGTAGAATCCATGGTGTGCAGGTAAGCCATAATTTTCAGTAGTTAAAGTG  
>HPV82\_Alpha\_6970427\_nt6722\_L1\_Tile\_rc|2  
TCCACTGTTCTAAAATTGTAGAATCCATGGTGTGCAGGTAAGCCATAATTTTCAGTAGTTA  
>HPV82\_Alpha\_6970427\_nt6792\_L1\_Tile\_rc|1  
GTTGCTGCATTTTTTACAAATCGATAGGCATCCTCCAAACTAGCGGAGGGGGGCAATGTT  
>HPV82\_Alpha\_6970427\_nt6882\_L1\_Tile\_rc|2  
GAAAAGCGTTCCTTAAAGGTCTACATTCCAAAATTTATATTTTGCCAAAGGGTCTTCTTTA  
>HPV83\_Alpha\_5059324\_nt5868\_L1\_Tile\_rc|1  
GTGGCTTTTTTTCCTTGACCATTAACCTGTACAGGATAATATGGATGTCCTACGGTAAGA  
>HPV83\_Alpha\_5059324\_nt5873\_L1\_Tile\_rc|1  
GGATAGTGGCTTTTTTTCCTTGACCATTAACCTGTACAGGATAATATGGATGTCCTACGG  
>HPV83\_Alpha\_5059324\_nt5878\_L1\_Tile\_rc|1  
CTTGGGGATAGTGGCTTTTTTTCCTTGACCATTAACCTGTACAGGATAATATGGATGTCC  
>HPV83\_Alpha\_5059324\_nt6158\_L1\_Tile\_rc|1  
TGATAATAAGCTGCGTTTGTGTGTAATCCACTGAGACATTGTCACGCCTATCTGTGTCTG  
>HPV83\_Alpha\_5059324\_nt6163\_L1\_Tile\_rc|1  
CCCAATGATAATAAGCTGCGTTTGTGTGTAATCCACTGAGACATTGTCACGCCTATCTGT  
>HPV83\_Alpha\_5059324\_nt6168\_L1\_Tile\_rc|1  
TTACACCCAATGATAATAAGCTGCGTTTGTGTGTAATCCACTGAGACATTGTCACGCCTA  
>HPV83\_Alpha\_5059324\_nt6178\_L1\_Tile\_rc|1  
TATTGGGGGCTTACACCCAATGATAATAAGCTGCGTTTGTGTGTAATCCACTGAGACATT  
>HPV83\_Alpha\_5059324\_nt6528\_L1\_Tile\_rc|1  
GCAGATGTGCCTGGAATATAATAAGAGGTAGGCAGCACCTCGCCCATAGTGCCATGCCTA  
>HPV83\_Alpha\_5059324\_nt6533\_L1\_Tile\_rc|1  
TATTAGCAGATGTGCCTGGAATATAATAAGAGGTAGGCAGCACCTCGCCCATAGTGCCAT



>HPV83\_Alpha\_5059324\_nt6538\_L1\_Tile\_rc|1  
CCTACTATTAGCAGATGTGCCTGGAATATAATAAGAGGTAGGCAGCACCTCGCCCATAGT  
>HPV83\_Alpha\_5059324\_nt6543\_L1\_Tile\_rc|1  
GTGTTCCCTACTATTAGCAGATGTGCCTGGAATATAATAAGAGGTAGGCAGCACCTCGCCC  
>HPV83\_Alpha\_5059324\_nt6548\_L1\_Tile\_rc|1  
TAAGAGTGTTCCCTACTATTAGCAGATGTGCCTGGAATATAATAAGAGGTAGGCAGCACCT  
>HPV83\_Alpha\_5059324\_nt6553\_L1\_Tile\_rc|1  
GCTGGTAAGAGTGTTCCCTACTATTAGCAGATGTGCCTGGAATATAATAAGAGGTAGGCAG  
>HPV83\_Alpha\_5059324\_nt6558\_L1\_Tile\_rc|1  
ATGTAGCTGGTAAGAGTGTTCCCTACTATTAGCAGATGTGCCTGGAATATAATAAGAGGTA  
>HPV83\_Alpha\_5059324\_nt6563\_L1\_Tile\_rc|1  
CATAGATGTAGCTGGTAAGAGTGTTCCCTACTATTAGCAGATGTGCCTGGAATATAATAAG  
>HPV83\_Alpha\_5059324\_nt6573\_L1\_Tile\_rc|1  
GGAGTAGGAGCATAGATGTAGCTGGTAAGAGTGTTCCCTACTATTAGCAGATGTGCCTGGA  
>HPV83\_Alpha\_5059324\_nt6583\_L1\_Tile\_rc|1  
GGAGCCACTAGGAGTAGGAGCATAGATGTAGCTGGTAAGAGTGTTCCCTACTATTAGCAGA  
>HPV83\_Alpha\_5059324\_nt6593\_L1\_Tile\_rc|1  
ACGATACCAGGGAGCCACTAGGAGTAGGAGCATAGATGTAGCTGGTAAGAGTGTTCCCTAC  
>HPV83\_Alpha\_5059324\_nt6598\_L1\_Tile\_rc|1  
ATCGGACGATACCAGGGAGCCACTAGGAGTAGGAGCATAGATGTAGCTGGTAAGAGTGTT  
>HPV83\_Alpha\_5059324\_nt6838\_L1\_Tile\_rc|1  
GGTCAGATGTATTTTGCAAAGTTGCAATATAACCTGTAAGTCATATTCCTCTGTGTGGCG  
>HPV83\_Alpha\_5059324\_nt6843\_L1\_Tile\_rc|1  
TCAGGGGTCAGATGTATTTTGCAAAGTTGCAATATAACCTGTAAGTCATATTCCTCTGTG  
>HPV83\_Alpha\_5059324\_nt6858\_L1\_Tile\_rc|1  
AGGTATGCCATAATTTTCAGGGGTCAGATGTATTTTGCAAAGTTGCAATATAACCTGTAAG  
>HPV83\_Alpha\_5059324\_nt7108\_L1\_Tile\_rc|1  
ACCCAGTTGCAAAAGAACTTACGGCCCAAAGGAACTGATCTAAATCTGTGGATAGTTT  
>HPV84\_Alpha\_12958167\_nt6196\_L1\_Tile\_rc|1  
GTAGAATTAGTGAAGTCAAAGGGGGGCAATCACCCGCACGATATTGCACATTAGTACAT  
>HPV84\_Alpha\_12958167\_nt6201\_L1\_Tile\_rc|1  
CAATGGTAGAATTAGTGAAGTCAAAGGGGGGCAATCACCCGCACGATATTGCACATTAG  
>HPV84\_Alpha\_12958167\_nt6466\_L1\_Tile\_rc|1  
GCCCCGGGAGGAGTCCCCTTAAGGTAAAAAGACTGAGGCACCTCCTCACCCATAGTACCC  
>HPV84\_Alpha\_12958167\_nt6471\_L1\_Tile\_rc|1  
GGGTGCCCCGGGAGGAGTCCCCTTAAGGTAAAAAGACTGAGGCACCTCCTCACCCATAG  
>HPV84\_Alpha\_12958167\_nt6481\_L1\_Tile\_rc|1  
GAACTGCTAAGGGTTGCCCCGGGAGGAGTCCCCTTAAGGTAAAAAGACTGAGGCACCTCC  
>HPV84\_Alpha\_12958167\_nt6486\_L1\_Tile\_rc|1  
ACACAGAACTGCTAAGGGTTGCCCCGGGAGGAGTCCCCTTAAGGTAAAAAGACTGAGGCA  
>HPV84\_Alpha\_12958167\_nt6691\_L1\_Tile\_rc|1  
AAATTGGTAGGTTTATATTCTGATTCCGGTGTGGTAGCAGCACTAATAGTAAAATTGGTG  
>HPV84\_Alpha\_12958167\_nt6696\_L1\_Tile\_rc|1  
CCTTAAAATTGGTAGGTTTATATTCTGATTCCGGTGTGGTAGCAGCACTAATAGTAAAAT  
>HPV84\_Alpha\_12958167\_nt6701\_L1\_Tile\_rc|1  
GTATTCCTTAAAATTGGTAGGTTTATATTCTGATTCCGGTGTGGTAGCAGCACTAATAGT  
>HPV84\_Alpha\_12958167\_nt7076\_L1\_Tile\_rc|1  
GGCAGACGCTGTACGTTTACGGGACACCAGGGTGGAACGTGGGGCAGACTGCAATAAAAA  
>HPV84\_Alpha\_12958167\_nt7111\_L1\_Tile\_rc|1  
TTGGCCTTACGCCGTTTGGAGGCAGGGGGGGTAGAGGCAGACGCTGTACGTTTACGGGAC  
>HPV84\_Alpha\_12958167\_nt7116\_L1\_Tile\_rc|1  
ACTTTTTTGGCCTTACGCCGTTTGGAGGCAGGGGGGGTAGAGGCAGACGCTGTACGTTTAC  
>HPV84\_Alpha\_12958167\_nt7118\_L1\_Tile\_rc|1  
TTACTTTTTTGGCCTTACGCCGTTTGGAGGCAGGGGGGGTAGAGGCAGACGCTGTACGTTT  
>HPVcand85\_Alpha\_4574720\_nt5721\_L1\_Tile\_rc|1

CCTCCATTTGAGGTAAC TTTATAGTATGGATGTCCAACGGTTAGAAGCCTAGAGCTGCCA  
>HPVcand85\_Alpha\_4574720\_nt5736\_L1\_Tile\_rc|1  
ATGTCTTGCTTGCGGCCTCCATTTGAGGTAAC TTTATAGTATGGATGTCCAACGGTTAGA  
>HPVcand85\_Alpha\_4574720\_nt5966\_L1\_Tile\_rc|1  
CTACAGAAGTAGCAACATGGGAATTTTCTGTGTCATCCAATTTGTTGTAAAAGGGATGAC  
>HPVcand85\_Alpha\_4574720\_nt5971\_L1\_Tile\_rc|1  
TGTAAC TACAGAAGTAGCAACATGGGAATTTTCTGTGTCATCCAATTTGTTGTAAAAGGG  
>HPVcand85\_Alpha\_4574720\_nt5976\_L1\_Tile\_rc|1  
TCGTGTGTAACTACAGAAGTAGCAACATGGGAATTTTCTGTGTCATCCAATTTGTTGTAA  
>HPVcand85\_Alpha\_4574720\_nt5981\_L1\_Tile\_rc|1  
TAGTGTGCTGTGTAACTACAGAAGTAGCAACATGGGAATTTTCTGTGTCATCCAATTTGT  
>HPVcand85\_Alpha\_4574720\_nt5986\_L1\_Tile\_rc|1  
ATCTCTAGTGTGCTGTGTAACTACAGAAGTAGCAACATGGGAATTTTCTGTGTCATCCAA  
>HPVcand85\_Alpha\_4574720\_nt6001\_L1\_Tile\_rc|1  
ATCCACTGACACATTATCTCTAGTGTGCTGTGTAACTACAGAAGTAGCAACATGGGAATT  
>HPVcand85\_Alpha\_4574720\_nt6131\_L1\_Tile\_rc|1  
GTGTATTTACTAGTTCTAATGGAGGACAGTCACCTGTTTGCACAGCACCGGGCTTACAGG  
>HPVcand85\_Alpha\_4574720\_nt6136\_L1\_Tile\_rc|1  
AATAGGTGTATTTACTAGTTCTAATGGAGGACAGTCACCTGTTTGCACAGCACCGGGCTT  
>HPVcand85\_Alpha\_4574720\_nt6376\_L1\_Tile\_rc|1  
TAATGTTTCCGGTACTGCATCTCCTATAGTGCCTCCCCTGTTCCAAAAATGGCGTGCAAA  
>HPVcand85\_Alpha\_4574720\_nt6381\_L1\_Tile\_rc|1  
ATATATAATGTTTCCGGTACTGCATCTCCTATAGTGCCTCCCCTGTTCCAAAAATGGCGT  
>HPVcand85\_Alpha\_4574720\_nt6386\_L1\_Tile\_rc|1  
CTTTTATATATAATGTTTCCGGTACTGCATCTCCTATAGTGCCTCCCCTGTTCCAAAAAT  
>HPVcand85\_Alpha\_4574720\_nt6391\_L1\_Tile\_rc|1  
AGTACCTTTTATATATAATGTTTCCGGTACTGCATCTCCTATAGTGCCTCCCCTGTTCCA  
>HPVcand85\_Alpha\_4574720\_nt6396\_L1\_Tile\_rc|1  
TCATTAGTACCTTTTATATATAATGTTTCCGGTACTGCATCTCCTATAGTGCCTCCCCTG  
>HPVcand85\_Alpha\_4574720\_nt6401\_L1\_Tile\_rc|1  
CCCTATCATTAGTACCTTTTATATATAATGTTTCCGGTACTGCATCTCCTATAGTGCCTC  
>HPVcand85\_Alpha\_4574720\_nt6406\_L1\_Tile\_rc|1  
TGTTGCCCTATCATTAGTACCTTTTATATATAATGTTTCCGGTACTGCATCTCCTATAGT  
>HPVcand85\_Alpha\_4574720\_nt6411\_L1\_Tile\_rc|1  
CCAGGTGTTGCCCTATCATTAGTACCTTTTATATATAATGTTTCCGGTACTGCATCTCCT  
>HPVcand85\_Alpha\_4574720\_nt6416\_L1\_Tile\_rc|1  
AGCTTCCAGGTGTTGCCCTATCATTAGTACCTTTTATATATAATGTTTCCGGTACTGCAT  
>HPVcand85\_Alpha\_4574720\_nt6421\_L1\_Tile\_rc|1  
AATACAGCTTCCAGGTGTTGCCCTATCATTAGTACCTTTTATATATAATGTTTCCGGTAC  
>HPVcand85\_Alpha\_4574720\_nt6426\_L1\_Tile\_rc|1  
GAATAAATACAGCTTCCAGGTGTTGCCCTATCATTAGTACCTTTTATATATAATGTTTCC  
>HPVcand85\_Alpha\_4574720\_nt6431\_L1\_Tile\_rc|1  
ATGGAGAATAAATACAGCTTCCAGGTGTTGCCCTATCATTAGTACCTTTTATATATAATG  
>HPVcand85\_Alpha\_4574720\_nt6436\_L1\_Tile\_rc|1  
AGGTGATGGAGAATAAATACAGCTTCCAGGTGTTGCCCTATCATTAGTACCTTTTATATA  
>HPVcand85\_Alpha\_4574720\_nt6441\_L1\_Tile\_rc|1  
CCACTAGGTGATGGAGAATAAATACAGCTTCCAGGTGTTGCCCTATCATTAGTACCTTTT  
>HPVcand85\_Alpha\_4574720\_nt6446\_L1\_Tile\_rc|1  
TAGACCCACTAGGTGATGGAGAATAAATACAGCTTCCAGGTGTTGCCCTATCATTAGTAC  
>HPVcand85\_Alpha\_4574720\_nt6586\_L1\_Tile\_rc|1  
AGATAAGGTAAGATTGGTACTACGTGTTGTGTCTACCACAGTTATAAATAATTGGTTGTG  
>HPVcand85\_Alpha\_4574720\_nt6606\_L1\_Tile\_rc|1  
ACTGGATTAGTAGTTGCAGTAGATAAGGTAAGATTGGTACTACGTGTTGTGTCTACCACA  
>HPVcand85\_Alpha\_4574720\_nt6611\_L1\_Tile\_rc|1  
ATGGAAC TGGATTAGTAGTTGCAGTAGATAAGGTAAGATTGGTACTACGTGTTGTGTCTA

>HPVcand85\_Alpha\_4574720\_nt6616\_L1\_Tile\_rc|1  
TATAGATGGAAGTGGATTAGTAGTTGCAGTAGATAAGGTAAGATTGGTACTACGTGTTGT  
>HPVcand85\_Alpha\_4574720\_nt6621\_L1\_Tile\_rc|1  
TCATATATAGATGGAAGTGGATTAGTAGTTGCAGTAGATAAGGTAAGATTGGTACTACGT  
>HPVcand85\_Alpha\_4574720\_nt6661\_L1\_Tile\_rc|1  
TTCTCTACATGGCGTGTGTATTCCCTTAAATTTAGAAGGTTTCATATATAGATGGAAGTGG  
>HPVcand85\_Alpha\_4574720\_nt6741\_L1\_Tile\_rc|1  
GGATCCATGTTATGTATATAAGACATAACATCAGTAGTAAGTGTAATTTTACACAATTGA  
>HPVcand85\_Alpha\_4574720\_nt6746\_L1\_Tile\_rc|1  
TAGTAGGATCCATGTTATGTATATAAGACATAACATCAGTAGTAAGTGTAATTTTACACA  
>HPVcand85\_Alpha\_4574720\_nt6751\_L1\_Tile\_rc|1  
TAAATAGTAGGATCCATGTTATGTATATAAGACATAACATCAGTAGTAAGTGTAATTTT  
>HPVcand85\_Alpha\_4574720\_nt6756\_L1\_Tile\_rc|1  
CTATCTAAAATAGTAGGATCCATGTTATGTATATAAGACATAACATCAGTAGTAAGTGTA  
>HPVcand85\_Alpha\_4574720\_nt6761\_L1\_Tile\_rc|1  
TCCAACATCTAAAATAGTAGGATCCATGTTATGTATATAAGACATAACATCAGTAGTAA  
>HPVcand85\_Alpha\_4574720\_nt6826\_L1\_Tile\_rc|1  
AGATGACTGTAAAAACCTATATGTATCTACTAAGCTAGCAGATGGGGGAGGACTAACACC  
>HPVcand85\_Alpha\_4574720\_nt6886\_L1\_Tile\_rc|1  
TAATTTTTCATATGGATCCTTTTTTTGTGGAACAACCATCCTTCTGACATGTAATGGC  
>HPVcand85\_Alpha\_4574720\_nt6931\_L1\_Tile\_rc|1  
TAAATCAGATGAAAAATGTTCTTTAAGATCCACATTCCAAAACCTTAATTTTTCATATGG  
>HPVcand85\_Alpha\_4574720\_nt7011\_L1\_Tile\_rc|1  
ACACGTTTCCTAGGGCCTATGGTGGGTTTAGGTCGTAACCCAGCCTGTAATAAAAACTTA  
>HPVcand85\_Alpha\_4574720\_nt7026\_L1\_Tile\_rc|1  
GTAGAAGTAGAAGCAACACGTTTCCTAGGGCCTATGGTGGGTTTAGGTCGTAACCCAGCC  
>HPVcand85\_Alpha\_4574720\_nt7031\_L1\_Tile\_rc|1  
TAGCAGTAGAAGTAGAAGCAACACGTTTCCTAGGGCCTATGGTGGGTTTAGGTCGTAACC  
>HPVcand85\_Alpha\_4574720\_nt7036\_L1\_Tile\_rc|1  
CCTAGTAGCAGTAGAAGTAGAAGCAACACGTTTCCTAGGGCCTATGGTGGGTTTAGGTCG  
>HPVcand85\_Alpha\_4574720\_nt7041\_L1\_Tile\_rc|1  
GAGGGCCTAGTAGCAGTAGAAGTAGAAGCAACACGTTTCCTAGGGCCTATGGTGGGTTTA  
>HPVcand85\_Alpha\_4574720\_nt7051\_L1\_Tile\_rc|1  
TTTCCGTTTGGAGGGCCTAGTAGCAGTAGAAGTAGAAGCAACACGTTTCCTAGGGCCTAT  
>HPVcand85\_Alpha\_4574720\_nt7056\_L1\_Tile\_rc|1  
GTACGTTTCCGTTTGGAGGGCCTAGTAGCAGTAGAAGTAGAAGCAACACGTTTCCTAGGG  
>HPVcand85\_Alpha\_4574720\_nt7061\_L1\_Tile\_rc|1  
TAGCAGTACGTTTCCGTTTGGAGGGCCTAGTAGCAGTAGAAGTAGAAGCAACACGTTTCC  
>HPVcand86\_Alpha\_15741127\_nt6186\_L1\_Tile\_rc|1  
GAATTGGTAAACTGTAATGGGGGGCAGTCCCTGGTTTAGGCTGCACATTAGAACACACT  
>HPVcand86\_Alpha\_15741127\_nt6486\_L1\_Tile\_rc|1  
GCATATACATAACTGCTAAGGGATCCTCGGGGGCCTGAGGAGCCCTTTAAATAATAAGTT  
>HPVcand86\_Alpha\_15741127\_nt6491\_L1\_Tile\_rc|1  
TGGGTGCATATACATAACTGCTAAGGGATCCTCGGGGGCCTGAGGAGCCCTTTAAATAAT  
>HPVcand86\_Alpha\_15741127\_nt6701\_L1\_Tile\_rc|1  
TTAGATATTCATTAACTTAGAGGGGTCATATTCAGAGGCCTTCTGGGTAGCGGCACTAA  
>HPVcand87\_Alpha\_14475578\_nt5878\_L1\_Tile\_rc|1  
TTGTTCTGACCAGGGGTGGTAACAGTAAGGATAGTAAGGGTGACCCACAGTAAGCAGG  
>HPVcand87\_Alpha\_14475578\_nt5883\_L1\_Tile\_rc|1  
ATTTCTTGTCTGACCAGGGGTGGTAACAGTAAGGATAGTAAGGGTGACCCACAGTAA  
>HPVcand87\_Alpha\_14475578\_nt5888\_L1\_Tile\_rc|1  
ATTGGATTTCTTGTCTGACCAGGGGTGGTAACAGTAAGGATAGTAAGGGTGACCCAC  
>HPVcand87\_Alpha\_14475578\_nt5893\_L1\_Tile\_rc|1  
GGAATATTGGATTTCTTGTCTGACCAGGGGTGGTAACAGTAAGGATAGTAAGGGTGA  
>HPVcand87\_Alpha\_14475578\_nt5898\_L1\_Tile\_rc|1

CCTTTGGAATATTGGATTTCTTGTCTGACCAGGGGTGGTAACAGTAACTGGATAGTAAG  
>HPVcand87\_Alpha\_14475578\_nt5903\_L1\_Tile\_rc|1  
AGACACCTTTGGAATATTGGATTTCTTGTCTGACCAGGGGTGGTAACAGTAACTGGATA  
>HPVcand87\_Alpha\_14475578\_nt5908\_L1\_Tile\_rc|1  
TAGCCAGACACCTTTGGAATATTGGATTTCTTGTCTGACCAGGGGTGGTAACAGTAACT  
>HPVcand87\_Alpha\_14475578\_nt6243\_L1\_Tile\_rc|1  
TGGGCTGTACATTGGCACAACAGTACCCTTACTCCAATGCTCCCCCTATAGAGGGCTTAC  
>HPVcand87\_Alpha\_14475578\_nt6248\_L1\_Tile\_rc|1  
TGTCTTGGGCTGTACATTGGCACAACAGTACCCTTACTCCAATGCTCCCCCTATAGAGGG  
>HPVcand87\_Alpha\_14475578\_nt6253\_L1\_Tile\_rc|1  
TCCCCCTGTCTTGGGCTGTACATTGGCACAACAGTACCCTTACTCCAATGCTCCCCCTATA  
>HPVcand87\_Alpha\_14475578\_nt6268\_L1\_Tile\_rc|1  
TGCAATGGTGGACAATCCCCTGTCTTGGGCTGTACATTGGCACAACAGTACCCTTACTC  
>HPVcand87\_Alpha\_14475578\_nt6283\_L1\_Tile\_rc|1  
GTAGAATTAGTAAATTGCAATGGTGGACAATCCCCTGTCTTGGGCTGTACATTGGCACA  
>HPVcand87\_Alpha\_14475578\_nt6288\_L1\_Tile\_rc|1  
GAATAGTAGAATTAGTAAATTGCAATGGTGGACAATCCCCTGTCTTGGGCTGTACATTGG  
>HPVcand87\_Alpha\_14475578\_nt6558\_L1\_Tile\_rc|1  
CCCTAGGGCCAGACGACGCCCCCTTCAAAAAATAGGTGTCAGGGACCTCCTCGCCCATAG  
>HPVcand87\_Alpha\_14475578\_nt6568\_L1\_Tile\_rc|1  
CTTAAAGAGGCCCTAGGGCCAGACGACGCCCCCTTCAAAAAATAGGTGTCAGGGACCTCC  
>HPVcand87\_Alpha\_14475578\_nt6583\_L1\_Tile\_rc|1  
GCATACACATAACTGCTTAAAGAGGCCCTAGGGCCAGACGACGCCCCCTTCAAAAAATAG  
>HPVcand87\_Alpha\_14475578\_nt6798\_L1\_Tile\_rc|1  
TTAAATATTCTTAAACTTTGTGGGGTCATATTCAGTGGTTGTTTGAGTGGCAGCACTAA  
>HPV88\_Gamma\_167600365\_nt5321\_L1\_Tile\_rc|1  
ATAATATTTTTGCCACAGGTTTAGCCGGCGGAAGGAACAGCTTCCCAGTTTGTGTGGCC  
>HPV88\_Gamma\_167600365\_nt5326\_L1\_Tile\_rc|1  
TGTAGATAATATTTTTGCCACAGGTTTAGCCGGCGGAAGGAACAGCTTCCCAGTTTGTG  
>HPV88\_Gamma\_167600365\_nt5336\_L1\_Tile\_rc|1  
CATAATCATCTGTAGATAATATTTTTGCCACAGGTTTAGCCGGCGGAAGGAACAGCTTCC  
>HPV88\_Gamma\_167600365\_nt5341\_L1\_Tile\_rc|1  
AATAACATAATCATCTGTAGATAATATTTTTGCCACAGGTTTAGCCGGCGGAAGGAACAG  
>HPV88\_Gamma\_167600365\_nt5356\_L1\_Tile\_rc|1  
ATGTAAGTGAAGTTCCAATAACATAATCATCTGTAGATAATATTTTTGCCACAGGTTTAGC  
>HPV88\_Gamma\_167600365\_nt5361\_L1\_Tile\_rc|1  
TGAAAATGTAAGTGAAGTTCCAATAACATAATCATCTGTAGATAATATTTTTGCCACAGGT  
>HPV88\_Gamma\_167600365\_nt5366\_L1\_Tile\_rc|1  
CAGCATGAAAATGTAAGTGAAGTTCCAATAACATAATCATCTGTAGATAATATTTTTGCCA  
>HPV88\_Gamma\_167600365\_nt5376\_L1\_Tile\_rc|1  
CGATCAGTGCCAGCATGAAAATGTAAGTGAAGTTCCAATAACATAATCATCTGTAGATAAT  
>HPV88\_Gamma\_167600365\_nt5381\_L1\_Tile\_rc|1  
ACAGACGATCAGTGCCAGCATGAAAATGTAAGTGAAGTTCCAATAACATAATCATCTGTAG  
>HPV88\_Gamma\_167600365\_nt5386\_L1\_Tile\_rc|1  
TGTTAACAGACGATCAGTGCCAGCATGAAAATGTAAGTGAAGTTCCAATAACATAATCATC  
>HPV88\_Gamma\_167600365\_nt5391\_L1\_Tile\_rc|1  
TCTACTGTTAACAGACGATCAGTGCCAGCATGAAAATGTAAGTGAAGTTCCAATAACATAA  
>HPV88\_Gamma\_167600365\_nt5396\_L1\_Tile\_rc|1  
GATGGTCTACTGTTAACAGACGATCAGTGCCAGCATGAAAATGTAAGTGAAGTTCCAATAA  
>HPV88\_Gamma\_167600365\_nt5411\_L1\_Tile\_rc|1  
TAATTTTCATAGTAGGGATGGTCTACTGTTAACAGACGATCAGTGCCAGCATGAAAATGTA  
>HPV88\_Gamma\_167600365\_nt5426\_L1\_Tile\_rc|1  
GATCTCCATCATTCCTAATTTTCATAGTAGGGATGGTCTACTGTTAACAGACGATCAGTGC  
>HPV88\_Gamma\_167600365\_nt5436\_L1\_Tile\_rc|1  
ATTTTGTGGGATCTCCATCATTCCTAATTTTCATAGTAGGGATGGTCTACTGTTAACAGA

>HPV88\_Gamma\_167600365\_nt5441\_L1\_Tile\_rc|1  
TCTCAATTTTGTGTTGGGATCTCCATCATTCCTAATTTTCATAGTAGGGATGGTCTACTGTTA  
>HPV88\_Gamma\_167600365\_nt5446\_L1\_Tile\_rc|1  
AGGAATCTCAATTTTGTGTTGGGATCTCCATCATTCCTAATTTTCATAGTAGGGATGGTCTAC  
>HPV88\_Gamma\_167600365\_nt5451\_L1\_Tile\_rc|1  
ACCTTAGGAATCTCAATTTTGTGTTGGGATCTCCATCATTCCTAATTTTCATAGTAGGGATGG  
>HPV88\_Gamma\_167600365\_nt5456\_L1\_Tile\_rc|1  
CAGACACCTTAGGAATCTCAATTTTGTGTTGGGATCTCCATCATTCCTAATTTTCATAGTAGG  
>HPV88\_Gamma\_167600365\_nt5461\_L1\_Tile\_rc|1  
GCATGCAGACACCTTAGGAATCTCAATTTTGTGTTGGGATCTCCATCATTCCTAATTTTCATA  
>HPV88\_Gamma\_167600365\_nt5516\_L1\_Tile\_rc|1  
CTATTAAGGCAAATTTATTTGGATCAGGCAATTTTCAGCCTAAACACTCGATATTGGCATG  
>HPV88\_Gamma\_167600365\_nt5521\_L1\_Tile\_rc|1  
CTGATCTATTAAGGCAAATTTATTTGGATCAGGCAATTTTCAGCCTAAACACTCGATATTG  
>HPV88\_Gamma\_167600365\_nt5526\_L1\_Tile\_rc|1  
ATTGACTGATCTATTAAGGCAAATTTATTTGGATCAGGCAATTTTCAGCCTAAACACTCGA  
>HPV88\_Gamma\_167600365\_nt5531\_L1\_Tile\_rc|1  
TGAAAATTGACTGATCTATTAAGGCAAATTTATTTGGATCAGGCAATTTTCAGCCTAAACA  
>HPV88\_Gamma\_167600365\_nt5536\_L1\_Tile\_rc|1  
AGGATTGAAAATTGACTGATCTATTAAGGCAAATTTATTTGGATCAGGCAATTTTCAGCCT  
>HPV88\_Gamma\_167600365\_nt5541\_L1\_Tile\_rc|1  
CGTTTCAGGATTGAAAATTGACTGATCTATTAAGGCAAATTTATTTGGATCAGGCAATTTTC  
>HPV88\_Gamma\_167600365\_nt5546\_L1\_Tile\_rc|1  
GTTTCACGTTTCAGGATTGAAAATTGACTGATCTATTAAGGCAAATTTATTTGGATCAGGCA  
>HPV88\_Gamma\_167600365\_nt5551\_L1\_Tile\_rc|1  
TAAACGTTTCACGTTTCAGGATTGAAAATTGACTGATCTATTAAGGCAAATTTATTTGGATC  
>HPV88\_Gamma\_167600365\_nt5556\_L1\_Tile\_rc|1  
CAAACCTAAACGTTTCACGTTTCAGGATTGAAAATTGACTGATCTATTAAGGCAAATTTATTT  
>HPV88\_Gamma\_167600365\_nt5566\_L1\_Tile\_rc|1  
TTTTAATTTCCAAACTAAACGTTTCACGTTTCAGGATTGAAAATTGACTGATCTATTAAGGC  
>HPV88\_Gamma\_167600365\_nt5571\_L1\_Tile\_rc|1  
ATACCTTTTAATTTCCAAACTAAACGTTTCACGTTTCAGGATTGAAAATTGACTGATCTATT  
>HPV88\_Gamma\_167600365\_nt5576\_L1\_Tile\_rc|1  
TTTGAATACCTTTTAATTTCCAAACTAAACGTTTCACGTTTCAGGATTGAAAATTGACTGAT  
>HPV88\_Gamma\_167600365\_nt5581\_L1\_Tile\_rc|1  
ACCAATTTGAATACCTTTTAATTTCCAAACTAAACGTTTCACGTTTCAGGATTGAAAATTGA  
>HPV88\_Gamma\_167600365\_nt5586\_L1\_Tile\_rc|1  
CCTCTACCAATTTGAATACCTTTTAATTTCCAAACTAAACGTTTCACGTTTCAGGATTGAAA  
>HPV88\_Gamma\_167600365\_nt5591\_L1\_Tile\_rc|1  
GTCCACCTCTACCAATTTGAATACCTTTTAATTTCCAAACTAAACGTTTCACGTTTCAGGAT  
>HPV88\_Gamma\_167600365\_nt5596\_L1\_Tile\_rc|1  
TAGTGGTCCACCTCTACCAATTTGAATACCTTTTAATTTCCAAACTAAACGTTTCACGTTTC  
>HPV88\_Gamma\_167600365\_nt5601\_L1\_Tile\_rc|1  
ACATTTAGTGGTCCACCTCTACCAATTTGAATACCTTTTAATTTCCAAACTAAACGTTTCA  
>HPV88\_Gamma\_167600365\_nt5616\_L1\_Tile\_rc|1  
TGACCTGCAGTACCTACATTTAGTGGTCCACCTCTACCAATTTGAATACCTTTTAATTTTC  
>HPV88\_Gamma\_167600365\_nt5621\_L1\_Tile\_rc|1  
AAGGATGACCTGCAGTACCTACATTTAGTGGTCCACCTCTACCAATTTGAATACCTTTTA  
>HPV88\_Gamma\_167600365\_nt5626\_L1\_Tile\_rc|1  
AAATAAAGGATGACCTGCAGTACCTACATTTAGTGGTCCACCTCTACCAATTTGAATACC  
>HPV88\_Gamma\_167600365\_nt5631\_L1\_Tile\_rc|1  
TTGTTAAATAAAGGATGACCTGCAGTACCTACATTTAGTGGTCCACCTCTACCAATTTGA  
>HPV88\_Gamma\_167600365\_nt5636\_L1\_Tile\_rc|1  
GAGCTTTGTTAAATAAAGGATGACCTGCAGTACCTACATTTAGTGGTCCACCTCTACCAA  
>HPV88\_Gamma\_167600365\_nt5666\_L1\_Tile\_rc|1

GTGGATAATCATTAGGATTTTCAGTATCTGGAGCTTTGTTAAATAAAGGATGACCTGCAG  
>HPV88\_Gamma\_167600365\_nt5676\_L1\_Tile\_rc|1  
GTTTGAGCTGGTGGATAATCATTAGGATTTTCAGTATCTGGAGCTTTGTTAAATAAAGGA  
>HPV88\_Gamma\_167600365\_nt5681\_L1\_Tile\_rc|1  
CATCTGTTTGAGCTGGTGGATAATCATTAGGATTTTCAGTATCTGGAGCTTTGTTAAATA  
>HPV88\_Gamma\_167600365\_nt5731\_L1\_Tile\_rc|1  
TATAAATAATTGGGTATGTTTGGGGTCCATAGACACGTTACGTCTGTCTTCATCTGTTTG  
>HPV88\_Gamma\_167600365\_nt5736\_L1\_Tile\_rc|1  
CCAATTATAAATAATTGGGTATGTTTGGGGTCCATAGACACGTTACGTCTGTCTTCATCT  
>HPV88\_Gamma\_167600365\_nt5741\_L1\_Tile\_rc|1  
TGCAACCAATTATAAATAATTGGGTATGTTTGGGGTCCATAGACACGTTACGTCTGTCTT  
>HPV88\_Gamma\_167600365\_nt5746\_L1\_Tile\_rc|1  
AGGAATGCAACCAATTATAAATAATTGGGTATGTTTGGGGTCCATAGACACGTTACGTCT  
>HPV88\_Gamma\_167600365\_nt5751\_L1\_Tile\_rc|1  
TCTGCAGGAATGCAACCAATTATAAATAATTGGGTATGTTTGGGGTCCATAGACACGTTA  
>HPV88\_Gamma\_167600365\_nt5756\_L1\_Tile\_rc|1  
CACCATCTGCAGGAATGCAACCAATTATAAATAATTGGGTATGTTTGGGGTCCATAGACA  
>HPV88\_Gamma\_167600365\_nt5761\_L1\_Tile\_rc|1  
ATATTCACCATCTGCAGGAATGCAACCAATTATAAATAATTGGGTATGTTTGGGGTCCAT  
>HPV88\_Gamma\_167600365\_nt5806\_L1\_Tile\_rc|1  
TCCTGCATTTCGCCTGATCTCCAACACATGGTTTAGCAACATCCCAATATTCACCATCTGC  
>HPV88\_Gamma\_167600365\_nt5811\_L1\_Tile\_rc|1  
CAGTCTCCTGCATTTCGCCTGATCTCCAACACATGGTTTAGCAACATCCCAATATTCACCA  
>HPV88\_Gamma\_167600365\_nt5816\_L1\_Tile\_rc|1  
GTGGACAGTCTCCTGCATTTCGCCTGATCTCCAACACATGGTTTAGCAACATCCCAATATT  
>HPV88\_Gamma\_167600365\_nt5826\_L1\_Tile\_rc|1  
AACTGTATAGGTGGACAGTCTCCTGCATTTCGCCTGATCTCCAACACATGGTTTAGCAACA  
>HPV88\_Gamma\_167600365\_nt5831\_L1\_Tile\_rc|1  
TAACTAACTGTATAGGTGGACAGTCTCCTGCATTTCGCCTGATCTCCAACACATGGTTTAG  
>HPV88\_Gamma\_167600365\_nt5836\_L1\_Tile\_rc|1  
AGCATTAACCTAAGTGTATAGGTGGACAGTCTCCTGCATTTCGCCTGATCTCCAACACATGG  
>HPV88\_Gamma\_167600365\_nt5841\_L1\_Tile\_rc|1  
ATAACAGCATTAACCTAAGTGTATAGGTGGACAGTCTCCTGCATTTCGCCTGATCTCCAACA  
>HPV88\_Gamma\_167600365\_nt5846\_L1\_Tile\_rc|1  
CCTGAATAACAGCATTAACCTAAGTGTATAGGTGGACAGTCTCCTGCATTTCGCCTGATCTC  
>HPV88\_Gamma\_167600365\_nt5851\_L1\_Tile\_rc|1  
TCCGTCCTGAATAACAGCATTAACCTAAGTGTATAGGTGGACAGTCTCCTGCATTTCGCCTG  
>HPV88\_Gamma\_167600365\_nt5856\_L1\_Tile\_rc|1  
ATTGTTCCGTCCTGAATAACAGCATTAACCTAAGTGTATAGGTGGACAGTCTCCTGCATTTC  
>HPV88\_Gamma\_167600365\_nt5861\_L1\_Tile\_rc|1  
CACCCATTGTTCCGTCCTGAATAACAGCATTAACCTAAGTGTATAGGTGGACAGTCTCCTG  
>HPV88\_Gamma\_167600365\_nt5866\_L1\_Tile\_rc|1  
TGTGTCAACCATTTGTTCCGTCCTGAATAACAGCATTAACCTAAGTGTATAGGTGGACAGTC  
>HPV88\_Gamma\_167600365\_nt5901\_L1\_Tile\_rc|1  
TGCAAAAAGTTCTTAAAATTTGCTGCCCCAAAACCTGTGTCACCCATTGTTCCGTCCTGA  
>HPV88\_Gamma\_167600365\_nt5926\_L1\_Tile\_rc|1  
ATCCAGAGGAACACCTGCTTTGTCTTGCAAAAAGTTCTTAAAATTTGCTGCCCCAAAACC  
>HPV88\_Gamma\_167600365\_nt5941\_L1\_Tile\_rc|1  
TATATCATTAATAATATCCAGAGGAACCTGCTTTGTCTTGCAAAAAGTTCTTAAAATT  
>HPV88\_Gamma\_167600365\_nt5986\_L1\_Tile\_rc|1  
GCCATAAACATCTTTGTCCATTTTAAGGAAGTCTGGATACATACATATATCATTAATAAT  
>HPV88\_Gamma\_167600365\_nt5991\_L1\_Tile\_rc|1  
TTATCGCCATAAACATCTTTGTCCATTTTAAGGAAGTCTGGATACATACATATATCATTA  
>HPV88\_Gamma\_167600365\_nt6011\_L1\_Tile\_rc|1  
GTTTTCCAAAAAAGAAACATTTATCGCCATAAACATCTTTGTCCATTTTAAGGAAGTCTG

>HPV88\_Gamma\_167600365\_nt6016\_L1\_Tile\_rc|1  
CTCACGTTTTCCAAAAAGAAACATTTATCGCCATAAACATCTTTGTCCATTTTAAGGAA  
>HPV88\_Gamma\_167600365\_nt6031\_L1\_Tile\_rc|1  
GCGAGCATACGACTGCTCACGTTTTCCAAAAAGAAACATTTATCGCCATAAACATCTTT  
>HPV88\_Gamma\_167600365\_nt6041\_L1\_Tile\_rc|1  
CCATAAAATGGCGAGCATACGACTGCTCACGTTTTCCAAAAAGAAACATTTATCGCCAT  
>HPV88\_Gamma\_167600365\_nt6051\_L1\_Tile\_rc|1  
CCTTCACGAGCCATAAAATGGCGAGCATACGACTGCTCACGTTTTCCAAAAAGAAACAT  
>HPV88\_Gamma\_167600365\_nt6056\_L1\_Tile\_rc|1  
TTTTACCTTCACGAGCCATAAAATGGCGAGCATACGACTGCTCACGTTTTCCAAAAAGA  
>HPV88\_Gamma\_167600365\_nt6066\_L1\_Tile\_rc|1  
GCATCTCCCATTTTACCTTCACGAGCCATAAAATGGCGAGCATACGACTGCTCACGTTTT  
>HPV88\_Gamma\_167600365\_nt6071\_L1\_Tile\_rc|1  
GTATGGCATCTCCCATTTTACCTTCACGAGCCATAAAATGGCGAGCATACGACTGCTCAC  
>HPV88\_Gamma\_167600365\_nt6076\_L1\_Tile\_rc|1  
CTCTGGTATGGCATCTCCCATTTTACCTTCACGAGCCATAAAATGGCGAGCATACGACTG  
>HPV88\_Gamma\_167600365\_nt6081\_L1\_Tile\_rc|1  
TTTCCCTCTGGTATGGCATCTCCCATTTTACCTTCACGAGCCATAAAATGGCGAGCATAC  
>HPV88\_Gamma\_167600365\_nt6086\_L1\_Tile\_rc|1  
ATTTATTTCCCTCTGGTATGGCATCTCCCATTTTACCTTCACGAGCCATAAAATGGCGAG  
>HPV88\_Gamma\_167600365\_nt6091\_L1\_Tile\_rc|1  
TAAGTATTTATTTCCCTCTGGTATGGCATCTCCCATTTTACCTTCACGAGCCATAAAATG  
>HPV88\_Gamma\_167600365\_nt6096\_L1\_Tile\_rc|1  
GGCAATAAGTATTTATTTCCCTCTGGTATGGCATCTCCCATTTTACCTTCACGAGCCATA  
>HPV88\_Gamma\_167600365\_nt6106\_L1\_Tile\_rc|1  
ATTTGTAGGTGGCAATAAGTATTTATTTCCCTCTGGTATGGCATCTCCCATTTTACCTTC  
>HPV88\_Gamma\_167600365\_nt6116\_L1\_Tile\_rc|1  
AATTCACAGCATTTGTAGGTGGCAATAAGTATTTATTTCCCTCTGGTATGGCATCTCCCA  
>HPV88\_Gamma\_167600365\_nt6121\_L1\_Tile\_rc|1  
TTTAAATTCACAGCATTTGTAGGTGGCAATAAGTATTTATTTCCCTCTGGTATGGCATC  
>HPV88\_Gamma\_167600365\_nt6126\_L1\_Tile\_rc|1  
CCCATTTTAAATTCACAGCATTTGTAGGTGGCAATAAGTATTTATTTCCCTCTGGTATG  
>HPV88\_Gamma\_167600365\_nt6131\_L1\_Tile\_rc|1  
GAGATCCCATTTTAAATTCACAGCATTTGTAGGTGGCAATAAGTATTTATTTCCCTCTG  
>HPV88\_Gamma\_167600365\_nt6136\_L1\_Tile\_rc|1  
AACATGAGATCCCATTTTAAATTCACAGCATTTGTAGGTGGCAATAAGTATTTATTTCC  
>HPV88\_Gamma\_167600365\_nt6141\_L1\_Tile\_rc|1  
AAATAAACATGAGATCCCATTTTAAATTCACAGCATTTGTAGGTGGCAATAAGTATTTA  
>HPV88\_Gamma\_167600365\_nt6161\_L1\_Tile\_rc|1  
GTGATCCACTAGCAGTAGGGAAATAAACATGAGATCCCATTTTAAATTCACAGCATTTG  
>HPV88\_Gamma\_167600365\_nt6166\_L1\_Tile\_rc|1  
AGTAAGTGATCCACTAGCAGTAGGGAAATAAACATGAGATCCCATTTTAAATTCACAGC  
>HPV88\_Gamma\_167600365\_nt6171\_L1\_Tile\_rc|1  
CTAGTAGTAAGTGATCCACTAGCAGTAGGGAAATAAACATGAGATCCCATTTTAAATTC  
>HPV88\_Gamma\_167600365\_nt6176\_L1\_Tile\_rc|1  
AATCACTAGTAGTAAGTGATCCACTAGCAGTAGGGAAATAAACATGAGATCCCATTTTAA  
>HPV88\_Gamma\_167600365\_nt6181\_L1\_Tile\_rc|1  
GTTAGAATCACTAGTAGTAAGTGATCCACTAGCAGTAGGGAAATAAACATGAGATCCCAT  
>HPV88\_Gamma\_167600365\_nt6186\_L1\_Tile\_rc|1  
AATAAGTTAGAATCACTAGTAGTAAGTGATCCACTAGCAGTAGGGAAATAAACATGAGAT  
>HPV88\_Gamma\_167600365\_nt6196\_L1\_Tile\_rc|1  
AGGTCTGTTAAATAAGTTAGAATCACTAGTAGTAAGTGATCCACTAGCAGTAGGGAAATA  
>HPV88\_Gamma\_167600365\_nt6201\_L1\_Tile\_rc|1  
CAATAAGGTCTGTTAAATAAGTTAGAATCACTAGTAGTAAGTGATCCACTAGCAGTAGGG  
>HPV88\_Gamma\_167600365\_nt6211\_L1\_Tile\_rc|1

TCTCTGTAGCCAATAAGGTCTGTAAATAAGTTAGAATCACTAGTAGTAAGTGATCCACT  
>HPV88\_Gamma\_167600365\_nt6221\_L1\_Tile\_rc|1  
CACCTAAAGATCTCTGTAGCCAATAAGGTCTGTAAATAAGTTAGAATCACTAGTAGTAA  
>HPV88\_Gamma\_167600365\_nt6316\_L1\_Tile\_rc|1  
TCCCTGATTATAAATGGAAAGAGTAAAATTAGTATTCCTGCTGTTATCAAGAACAGTAAC  
>HPV88\_Gamma\_167600365\_nt6321\_L1\_Tile\_rc|1  
GCTCCTCCCTGATTATAAATGGAAAGAGTAAAATTAGTATTCCTGCTGTTATCAAGAACA  
>HPV88\_Gamma\_167600365\_nt6326\_L1\_Tile\_rc|1  
CAATAGCTCCTCCCTGATTATAAATGGAAAAGAGTAAAATTAGTATTCCTGCTGTTATCAA  
>HPV88\_Gamma\_167600365\_nt6336\_L1\_Tile\_rc|1  
TACTGATTTCCAATAGCTCCTCCCTGATTATAAATGGAAAGAGTAAAATTAGTATTCCTG  
>HPV88\_Gamma\_167600365\_nt6341\_L1\_Tile\_rc|1  
AAGTATACTGATTTCCAATAGCTCCTCCCTGATTATAAATGGAAAGAGTAAAATTAGTAT  
>HPV88\_Gamma\_167600365\_nt6346\_L1\_Tile\_rc|1  
TTTATAAGTATACTGATTTCCAATAGCTCCTCCCTGATTATAAATGGAAAGAGTAAAATT  
>HPV88\_Gamma\_167600365\_nt6351\_L1\_Tile\_rc|1  
TGAGATTTATAAGTATACTGATTTCCAATAGCTCCTCCCTGATTATAAATGGAAAGAGTA  
>HPV88\_Gamma\_167600365\_nt6356\_L1\_Tile\_rc|1  
AATCTTGAGATTTATAAGTATACTGATTTCCAATAGCTCCTCCCTGATTATAAATGGAAA  
>HPV88\_Gamma\_167600365\_nt6361\_L1\_Tile\_rc|1  
AGTAAAATCTTGAGATTTATAAGTATACTGATTTCCAATAGCTCCTCCCTGATTATAAAT  
>HPV88\_Gamma\_167600365\_nt6366\_L1\_Tile\_rc|1  
TACTGAGTAAAATCTTGAGATTTATAAGTATACTGATTTCCAATAGCTCCTCCCTGATTA  
>HPV88\_Gamma\_167600365\_nt6371\_L1\_Tile\_rc|1  
GAGTATACTGAGTAAAATCTTGAGATTTATAAGTATACTGATTTCCAATAGCTCCTCCCT  
>HPV88\_Gamma\_167600365\_nt6376\_L1\_Tile\_rc|1  
ATGTCGAGTATACTGAGTAAAATCTTGAGATTTATAAGTATACTGATTTCCAATAGCTCC  
>HPV88\_Gamma\_167600365\_nt6381\_L1\_Tile\_rc|1  
TCTGCATGTCGAGTATACTGAGTAAAATCTTGAGATTTATAAGTATACTGATTTCCAATA  
>HPV88\_Gamma\_167600365\_nt6386\_L1\_Tile\_rc|1  
ATTCCTCTGCATGTCGAGTATACTGAGTAAAATCTTGAGATTTATAAGTATACTGATTTCC  
>HPV88\_Gamma\_167600365\_nt6391\_L1\_Tile\_rc|1  
TTCGTATTCCTCTGCATGTCGAGTATACTGAGTAAAATCTTGAGATTTATAAGTATACTG  
>HPV88\_Gamma\_167600365\_nt6396\_L1\_Tile\_rc|1  
TCCAATTCGTATTCCTCTGCATGTCGAGTATACTGAGTAAAATCTTGAGATTTATAAGTA  
>HPV88\_Gamma\_167600365\_nt6401\_L1\_Tile\_rc|1  
TAGCTTCCAATTCGTATTCCTCTGCATGTCGAGTATACTGAGTAAAATCTTGAGATTTAT  
>HPV88\_Gamma\_167600365\_nt6406\_L1\_Tile\_rc|1  
GAATATAGCTTCCAATTCGTATTCCTCTGCATGTCGAGTATACTGAGTAAAATCTTGAGA  
>HPV88\_Gamma\_167600365\_nt6411\_L1\_Tile\_rc|1  
AGCTGGAATATAGCTTCCAATTCGTATTCCTCTGCATGTCGAGTATACTGAGTAAAATCT  
>HPV88\_Gamma\_167600365\_nt6421\_L1\_Tile\_rc|1  
AACTCTACAAAGCTGGAATATAGCTTCCAATTCGTATTCCTCTGCATGTCGAGTATACTG  
>HPV88\_Gamma\_167600365\_nt6426\_L1\_Tile\_rc|1  
AAAGGAACCTCTACAAAGCTGGAATATAGCTTCCAATTCGTATTCCTCTGCATGTCGAGTA  
>HPV88\_Gamma\_167600365\_nt6431\_L1\_Tile\_rc|1  
GCTCCAAAGGAACCTCTACAAAGCTGGAATATAGCTTCCAATTCGTATTCCTCTGCATGTC  
>HPV88\_Gamma\_167600365\_nt6451\_L1\_Tile\_rc|1  
TAAGTGAGCTAAAATATCAGGCTCCAAAGGAACCTCTACAAAGCTGGAATATAGCTTCCAA  
>HPV88\_Gamma\_167600365\_nt6456\_L1\_Tile\_rc|1  
ACATTTAAGTGAGCTAAAATATCAGGCTCCAAAGGAACCTCTACAAAGCTGGAATATAGCT  
>HPV88\_Gamma\_167600365\_nt6566\_L1\_Tile\_rc|1  
TAGGACATCTTGTGGCCAAAGATGTTATATATCTATAATTGTCCTCTATACTCTGAGGAG  
>HPV88\_Gamma\_167600365\_nt6571\_L1\_Tile\_rc|1  
TTCAGTAGGACATCTTGTGGCCAAAGATGTTATATATCTATAATTGTCCTCTATACTCTG



>HPV88\_Gamma\_167600365\_nt6576\_L1\_Tile\_rc|1  
GGATTTTCAGTAGGACATCTTGTTGCCAAAGATGTTATATATCTATAATTGTCCTCTATA  
>HPV88\_Gamma\_167600365\_nt6581\_L1\_Tile\_rc|1  
GAGCAGGATTTTCAGTAGGACATCTTGTTGCCAAAGATGTTATATATCTATAATTGTCCT  
>HPV88\_Gamma\_167600365\_nt6596\_L1\_Tile\_rc|1  
GGTCAGGTATTTCTGGAGCAGGATTTTCAGTAGGACATCTTGTTGCCAAAGATGTTATAT  
>HPV88\_Gamma\_167600365\_nt6601\_L1\_Tile\_rc|1  
ATAAGGGTCAGGTATTTCTGGAGCAGGATTTTCAGTAGGACATCTTGTTGCCAAAGATGT  
>HPV88\_Gamma\_167600365\_nt6606\_L1\_Tile\_rc|1  
TCTTTATAAGGGTCAGGTATTTCTGGAGCAGGATTTTCAGTAGGACATCTTGTTGCCAA  
>HPV88\_Gamma\_167600365\_nt6611\_L1\_Tile\_rc|1  
TATAATCTTTATAAGGGTCAGGTATTTCTGGAGCAGGATTTTCAGTAGGACATCTTGTTG  
>HPV88\_Gamma\_167600365\_nt6621\_L1\_Tile\_rc|1  
AACCAGGATTTCTGGAGCAGGATTTTCAGTAGGA  
>HPV88\_Gamma\_167600365\_nt6626\_L1\_Tile\_rc|1  
CAACTAACCAAAAATTATAATCTTTATAAGGGTCAGGTATTTCTGGAGCAGGATTTTCAG  
>HPV88\_Gamma\_167600365\_nt6631\_L1\_Tile\_rc|1  
CAAATCAACTAACCAAAAATTATAATCTTTATAAGGGTCAGGTATTTCTGGAGCAGGATT  
>HPV88\_Gamma\_167600365\_nt6641\_L1\_Tile\_rc|1  
ACTTCTCTTGCAAATCAACTAACCAAAAATTATAATCTTTATAAGGGTCAGGTATTTCTG  
>HPV88\_Gamma\_167600365\_nt6646\_L1\_Tile\_rc|1  
GGAGAACTTCTCTTGCAAATCAACTAACCAAAAATTATAATCTTTATAAGGGTCAGGTAT  
>HPV88\_Gamma\_167600365\_nt6651\_L1\_Tile\_rc|1  
TCACTGGAGAACTTCTCTTGCAAATCAACTAACCAAAAATTATAATCTTTATAAGGGTCA  
>HPV88\_Gamma\_167600365\_nt6656\_L1\_Tile\_rc|1  
CAAGTTCCTGGAAGTCTCTTGCAAATCAACTAACCAAAAATTATAATCTTTATAAG  
>HPV88\_Gamma\_167600365\_nt6661\_L1\_Tile\_rc|1  
TTGGTCAAGTTCCTGGAAGTCTCTTGCAAATCAACTAACCAAAAATTATAATCTTT  
>HPV88\_Gamma\_167600365\_nt6666\_L1\_Tile\_rc|1  
CTAAATTGGTCAAGTTCCTGGAAGTCTCTTGCAAATCAACTAACCAAAAATTATAA  
>HPV88\_Gamma\_167600365\_nt6676\_L1\_Tile\_rc|1  
GCGACCTAAGCTAAATTGGTCAAGTTCCTGGAAGTCTCTTGCAAATCAACTAACCA  
>HPV88\_Gamma\_167600365\_nt6681\_L1\_Tile\_rc|1  
AATTTGCGACCTAAGCTAAATTGGTCAAGTTCCTGGAAGTCTCTTGCAAATCAACT  
>HPV88\_Gamma\_167600365\_nt6686\_L1\_Tile\_rc|1  
ACAAAAATTTGCGACCTAAGCTAAATTGGTCAAGTTCCTGGAAGTCTCTTGCAAAT  
>HPV88\_Gamma\_167600365\_nt6691\_L1\_Tile\_rc|1  
TTGAAACAAAAATTTGCGACCTAAGCTAAATTGGTCAAGTTCCTGGAAGTCTCTTG  
>HPV88\_Gamma\_167600365\_nt6731\_L1\_Tile\_rc|1  
TGGCAACTGTCCTGACACGTTTTGTGGGCAGCAAACCACTTTGAAACAAAAATTTGCGAC  
>HPV88\_Gamma\_167600365\_nt6736\_L1\_Tile\_rc|1  
ACTATTGGCAACTGTCCTGACACGTTTTGTGGGCAGCAAACCACTTTGAAACAAAAATTT  
>HPV88\_Gamma\_167600365\_nt6761\_L1\_Tile\_rc|1  
CTGTTCTGGAAGTATTTCTAACAGAACTATTGGCAACTGTCCTGACACGTTTTGTGGGCA  
>HPV88\_Gamma\_167600365\_nt6766\_L1\_Tile\_rc|1  
TTTTACTGTTCTGGAAGTATTTCTAACAGAACTATTGGCAACTGTCCTGACACGTTTTGT  
>HPV88\_Gamma\_167600365\_nt6771\_L1\_Tile\_rc|1  
TTTCTTTTACTGTTCTGGAAGTATTTCTAACAGAACTATTGGCAACTGTCCTGACACGT  
>HPV88\_Gamma\_167600365\_nt6776\_L1\_Tile\_rc|1  
TTCGTTTTCTTTTACTGTTCTGGAAGTATTTCTAACAGAACTATTGGCAACTGTCCTGA  
>HPV88\_Gamma\_167600365\_nt6784\_L1\_Tile\_rc|1  
TTATCGTGTTCGTTTTCTTTTACTGTTCTGGAAGTATTTCTAACAGAACTATTGGCAAC  
>HPVcand89\_Alpha\_22095322\_nt5808\_L1\_Tile\_rc|1  
CTCCATAATAGTACAGGTTGGTACGCTGGACATAGCGGTCCGTACTTAAACTTTGGACA  
>HPVcand89\_Alpha\_22095322\_nt5853\_L1\_Tile\_rc|1

GTACAGTATAATAAGGGTGGCCAACTGTAATAAGGCGGGAGCTGCCTCCATAATAGTACA  
>HPVcand89\_Alpha\_22095322\_nt5868\_L1\_Tile\_rc|1  
TAGCACCATTGACCTGTACAGTATAATAAGGGTGGCCAACTGTAATAAGGCGGGAGCTGC  
>HPVcand89\_Alpha\_22095322\_nt5873\_L1\_Tile\_rc|1  
TTTGTTAGCACCATTGACCTGTACAGTATAATAAGGGTGGCCAACTGTAATAAGGCGGGA  
>HPVcand89\_Alpha\_22095322\_nt5883\_L1\_Tile\_rc|1  
TGTTGGCCTTTTTGTTAGCACCATTGACCTGTACAGTATAATAAGGGTGGCCAACTGTAA  
>HPVcand89\_Alpha\_22095322\_nt5888\_L1\_Tile\_rc|1  
AGGTATGTTGGCCTTTTTGTTAGCACCATTGACCTGTACAGTATAATAAGGGTGGCCAAAC  
>HPVcand89\_Alpha\_22095322\_nt5898\_L1\_Tile\_rc|1  
CTGATACCTTAGGTATGTTGGCCTTTTTGTTAGCACCATTGACCTGTACAGTATAATAAG  
>HPVcand89\_Alpha\_22095322\_nt6123\_L1\_Tile\_rc|1  
TGTC AACATCTGCAGCAACCAATAAGGAAGCATTTTCAGTGT CATCCAAACGGTTGTATA  
>HPVcand89\_Alpha\_22095322\_nt6138\_L1\_Tile\_rc|1  
ATATATTATCCCTACTGTCAACATCTGCAGCAACCAATAAGGAAGCATTTTCAGTGT CAT  
>HPVcand89\_Alpha\_22095322\_nt6143\_L1\_Tile\_rc|1  
AACAGATATATTATCCCTACTGTCAACATCTGCAGCAACCAATAAGGAAGCATTTTCAGT  
>HPVcand89\_Alpha\_22095322\_nt6153\_L1\_Tile\_rc|1  
GTTTATAGTCAACAGATATATTATCCCTACTGTCAACATCTGCAGCAACCAATAAGGAAG  
>HPVcand89\_Alpha\_22095322\_nt6158\_L1\_Tile\_rc|1  
TGTTTGTTTATAGTCAACAGATATATTATCCCTACTGTCAACATCTGCAGCAACCAATAA  
>HPVcand89\_Alpha\_22095322\_nt6273\_L1\_Tile\_rc|1  
TATTTAGCAACTGCAAAGGTGGGCAATCCCCCTGCTGAGGCACAACACTAGAGCACACAG  
>HPVcand89\_Alpha\_22095322\_nt6278\_L1\_Tile\_rc|1  
AGTAGTATTTAGCAACTGCAAAGGTGGGCAATCCCCCTGCTGAGGCACAACACTAGAGCA  
>HPVcand89\_Alpha\_22095322\_nt6538\_L1\_Tile\_rc|1  
GCAGACCCAGGCATATACAAGGTTTTTGGCAGGTCCTCACCCATAACACCCCTGCCTATTA  
>HPVcand89\_Alpha\_22095322\_nt6548\_L1\_Tile\_rc|1  
GTTATTAGCAGCAGACCCAGGCATATACAAGGTTTTTGGCAGGTCCTCACCCATAACACC  
>HPVcand89\_Alpha\_22095322\_nt6553\_L1\_Tile\_rc|1  
TTTCTGTTATTAGCAGCAGACCCAGGCATATACAAGGTTTTTGGCAGGTCCTCACCCATA  
>HPVcand89\_Alpha\_22095322\_nt6558\_L1\_Tile\_rc|1  
GTGTATTTCTGTTATTAGCAGCAGACCCAGGCATATACAAGGTTTTTGGCAGGTCCTCAC  
>HPVcand89\_Alpha\_22095322\_nt6563\_L1\_Tile\_rc|1  
AGTAAGTGTATTTCTGTTATTAGCAGCAGACCCAGGCATATACAAGGTTTTTGGCAGGTC  
>HPVcand89\_Alpha\_22095322\_nt6568\_L1\_Tile\_rc|1  
TAGCTAGTAAGTGTATTTCTGTTATTAGCAGCAGACCCAGGCATATACAAGGTTTTTGGC  
>HPVcand89\_Alpha\_22095322\_nt6573\_L1\_Tile\_rc|1  
ATACATAGCTAGTAAGTGTATTTCTGTTATTAGCAGCAGACCCAGGCATATACAAGGTTT  
>HPVcand89\_Alpha\_22095322\_nt6578\_L1\_Tile\_rc|1  
GGCATATACATAGCTAGTAAGTGTATTTCTGTTATTAGCAGCAGACCCAGGCATATACAA  
>HPVcand89\_Alpha\_22095322\_nt6583\_L1\_Tile\_rc|1  
GTTGGGGCATATACATAGCTAGTAAGTGTATTTCTGTTATTAGCAGCAGACCCAGGCATA  
>HPVcand89\_Alpha\_22095322\_nt6598\_L1\_Tile\_rc|1  
ATAGACCCACTGGGCGTTGGGGCATATACATAGCTAGTAAGTGTATTTCTGTTATTAGCA  
>HPVcand89\_Alpha\_22095322\_nt6603\_L1\_Tile\_rc|1  
TAACCATAGACCCACTGGGCGTTGGGGCATATACATAGCTAGTAAGTGTATTTCTGTTAT  
>HPVcand89\_Alpha\_22095322\_nt6608\_L1\_Tile\_rc|1  
AGATGTAACCATAGACCCACTGGGCGTTGGGGCATATACATAGCTAGTAAGTGTATTTCT  
>HPVcand89\_Alpha\_22095322\_nt6778\_L1\_Tile\_rc|1  
AAGCGTGTAAGTGTATTTCTGTGCCAGACTGGGAAGCAGCACAAATGGTAAGGTTGGTA  
>HPVcand89\_Alpha\_22095322\_nt6783\_L1\_Tile\_rc|1  
CCTTAAAGCGTGTAAGTGTATTTCTGTGCCAGACTGGGAAGCAGCACAAATGGTAAGGT  
>HPVcand89\_Alpha\_22095322\_nt6788\_L1\_Tile\_rc|1  
ATATTCCTTAAAGCGTGTAAGTGTATTTCTGTGCCAGACTGGGAAGCAGCACAAATGGT

>HPVcand89\_Alpha\_22095322\_nt6793\_L1\_Tile\_rc|1  
CTTAAATATTCCCTTAAAGCGTGTAGAACTGTATTCTGTGCCAGACTGGGAAGCAGCACAA  
>HPVcand89\_Alpha\_22095322\_nt6798\_L1\_Tile\_rc|1  
TGTGTCTTAAATATTCCCTTAAAGCGTGTAGAACTGTATTCTGTGCCAGACTGGGAAGCAG  
>HPVcand89\_Alpha\_22095322\_nt6858\_L1\_Tile\_rc|1  
TCTCAGGCGTTAGGTGTATCTTACATAGTTGGAATATAAACTGTAGGTCATATTCCTCAG  
>HPVcand89\_Alpha\_22095322\_nt6863\_L1\_Tile\_rc|1  
CATTATCTCAGGCGTTAGGTGTATCTTACATAGTTGGAATATAAACTGTAGGTCATATTC  
>HPVcand89\_Alpha\_22095322\_nt6873\_L1\_Tile\_rc|1  
GTAAATAGGACATTATCTCAGGCGTTAGGTGTATCTTACATAGTTGGAATATAAACTGTA  
>HPVcand89\_Alpha\_22095322\_nt6878\_L1\_Tile\_rc|1  
ATTGTGTAAATAGGACATTATCTCAGGCGTTAGGTGTATCTTACATAGTTGGAATATAAA  
>HPVcand89\_Alpha\_22095322\_nt6883\_L1\_Tile\_rc|1  
TTCATATTGTGTAAATAGGACATTATCTCAGGCGTTAGGTGTATCTTACATAGTTGGAAT  
>HPVcand89\_Alpha\_22095322\_nt6888\_L1\_Tile\_rc|1  
TGTCATTCATATTGTGTAAATAGGACATTATCTCAGGCGTTAGGTGTATCTTACATAGTT  
>HPVcand89\_Alpha\_22095322\_nt6893\_L1\_Tile\_rc|1  
CAATGTGTCAATTCATATTGTGTAAATAGGACATTATCTCAGGCGTTAGGTGTATCTTACA  
>HPVcand89\_Alpha\_22095322\_nt6898\_L1\_Tile\_rc|1  
TCTAACAATGTGTCAATTCATATTGTGTAAATAGGACATTATCTCAGGCGTTAGGTGTATC  
>HPVcand89\_Alpha\_22095322\_nt6903\_L1\_Tile\_rc|1  
ATTCATCTAACAATGTGTCAATTCATATTGTGTAAATAGGACATTATCTCAGGCGTTAGGT  
>HPVcand89\_Alpha\_22095322\_nt7198\_L1\_Tile\_rc|1  
TTGGCCTTTTTGCGTTTTGGGGGCTTTGGAGGTAGACACGGGGGCAGCACGCTTGCGAGGT  
>HPV90\_Alpha\_22138122\_nt5908\_L1\_Tile\_rc|1  
TTTTTCTTGATTGCTTTTTTGATAGCAAAATAAGGATGGCCAACAGTTAACAGTCGGGAAC  
>HPV90\_Alpha\_22138122\_nt6258\_L1\_Tile\_rc|1  
TGGGGTACCCTTTGCCCAGTGCTCGCCTAAAGGAGGTTTGCACCCTATAATAAATAGCTG  
>HPV90\_Alpha\_22138122\_nt6263\_L1\_Tile\_rc|1  
TTGCATGGGGTACCCTTTGCCCAGTGCTCGCCTAAAGGAGGTTTGCACCCTATAATAAAT  
>HPV90\_Alpha\_22138122\_nt6273\_L1\_Tile\_rc|1  
ATTAGACATATTGCATGGGGTACCCTTTGCCCAGTGCTCGCCTAAAGGAGGTTTGCACCC  
>HPV90\_Alpha\_22138122\_nt6278\_L1\_Tile\_rc|1  
TGTACATTAGACATATTGCATGGGGTACCCTTTGCCCAGTGCTCGCCTAAAGGAGGTTTG  
>HPV90\_Alpha\_22138122\_nt6283\_L1\_Tile\_rc|1  
CAGCCTGTACATTAGACATATTGCATGGGGTACCCTTTGCCCAGTGCTCGCCTAAAGGAG  
>HPV90\_Alpha\_22138122\_nt6308\_L1\_Tile\_rc|1  
TTAAGTTCTATAGGAGGGCAATCCCCAGCCTGTACATTAGACATATTGCATGGGGTACCC  
>HPV90\_Alpha\_22138122\_nt6313\_L1\_Tile\_rc|1  
AAGATTTAAGTTCTATAGGAGGGCAATCCCCAGCCTGTACATTAGACATATTGCATGGGG  
>HPV90\_Alpha\_22138122\_nt6523\_L1\_Tile\_rc|1  
TGTTATAAAAAGTGCCTTATAAACATCTGTTCCCTACGTAAACAGAAAAACATAAGGTCAC  
>HPV90\_Alpha\_22138122\_nt6548\_L1\_Tile\_rc|1  
ATTGCGTCGCCCATAGTACCTGCTCTGTTATAAAAAGTGCCTTATAAACATCTGTTCCCTA  
>HPV90\_Alpha\_22138122\_nt6558\_L1\_Tile\_rc|1  
GCCATCGGGAATTGCGTCGCCCATAGTACCTGCTCTGTTATAAAAAGTGCCTTATAAACAT  
>HPV90\_Alpha\_22138122\_nt6563\_L1\_Tile\_rc|1  
ACAAAGCCATCGGGAATTGCGTCGCCCATAGTACCTGCTCTGTTATAAAAAGTGCCTTATA  
>HPV90\_Alpha\_22138122\_nt6568\_L1\_Tile\_rc|1  
TTAGCACAAAGCCATCGGGAATTGCGTCGCCCATAGTACCTGCTCTGTTATAAAAAGTGCC  
>HPV90\_Alpha\_22138122\_nt6573\_L1\_Tile\_rc|1  
TCCTTTTAGCACAAAGCCATCGGGAATTGCGTCGCCCATAGTACCTGCTCTGTTATAAAA  
>HPV90\_Alpha\_22138122\_nt6578\_L1\_Tile\_rc|1  
GATGTTCCCTTTTAGCACAAAGCCATCGGGAATTGCGTCGCCCATAGTACCTGCTCTGTTA  
>HPV90\_Alpha\_22138122\_nt6583\_L1\_Tile\_rc|1

TAGAAGATGTTCCCTTTTAGCACAAAGCCATCGGGAATTGCGTCGCCCATAGTACCTGCTC  
>HPV90\_Alpha\_22138122\_nt6593\_L1\_Tile\_rc|1  
CCACGAGAGGTAGAAGATGTTCCCTTTTAGCACAAAGCCATCGGGAATTGCGTCGCCCATA  
>HPV90\_Alpha\_22138122\_nt6603\_L1\_Tile\_rc|1  
TGTAGGAGTGCCACGAGAGGTAGAAGATGTTCCCTTTTAGCACAAAGCCATCGGGAATTGC  
>HPV90\_Alpha\_22138122\_nt7058\_L1\_Tile\_rc|1  
TCCTTGTTCTCTGTAGGGACAGCAGAAGGTTTTTGACAGGAAATAGCCTGGGACTGTAGG  
>HPV90\_Alpha\_22138122\_nt7148\_L1\_Tile\_rc|1  
AAAAATTTCCCTGCCAAGAGGGAATTGGTCTAGCTCAAGGGAAAAACGTTTCAGACAAATCC  
>HPV90\_Alpha\_22138122\_nt7173\_L1\_Tile\_rc|1  
CCGTACCCGGGTGCCACGCTGCAGCAAAAATTTCCCTGCCAAGAGGGAATTGGTCTAGCTC  
>HPV90\_Alpha\_22138122\_nt7178\_L1\_Tile\_rc|1  
GACGACCGTACCCGGGTGCCACGCTGCAGCAAAAATTTCCCTGCCAAGAGGGAATTGGTCT  
>HPV90\_Alpha\_22138122\_nt7251\_L1\_Tile\_rc|1  
TTAGGAACGTTTGGACCGTTTACGTTTTGTAGAGGGGCGGTAGAGGGTGCGGGACGCTT  
>HPV91\_Alpha\_22023568\_nt5596\_L1\_Tile\_rc|1  
TGTTAACAATTTTTGTTGTGTTAGGCAGTGTAGACACATTGGTGTGGTATGAGGTACAT  
>HPV91\_Alpha\_22023568\_nt5601\_L1\_Tile\_rc|1  
TGTAAGTGTAAACAATTTTTGTTGTGTTAGGCAGTGTAGACACATTGGTGTGGTATGAGG  
>HPV91\_Alpha\_22023568\_nt5606\_L1\_Tile\_rc|1  
GGGACTGTAGTGTTAACAATTTTTGTTGTGTTAGGCAGTGTAGACACATTGGTGTGGTA  
>HPV91\_Alpha\_22023568\_nt5611\_L1\_Tile\_rc|1  
CAAGTGGGACTGTAGTGTTAACAATTTTTGTTGTGTTAGGCAGTGTAGACACATTGGTGT  
>HPV91\_Alpha\_22023568\_nt5616\_L1\_Tile\_rc|1  
TGTTGCAAGTGGGACTGTAGTGTTAACAATTTTTGTTGTGTTAGGCAGTGTAGACACATT  
>HPV91\_Alpha\_22023568\_nt5621\_L1\_Tile\_rc|1  
GGTACTGTTGCAAGTGGGACTGTAGTGTTAACAATTTTTGTTGTGTTAGGCAGTGTAGAC  
>HPV91\_Alpha\_22023568\_nt5626\_L1\_Tile\_rc|1  
TATCAGGTACTGTTGCAAGTGGGACTGTAGTGTTAACAATTTTTGTTGTGTTAGGCAGTG  
>HPV91\_Alpha\_22023568\_nt5631\_L1\_Tile\_rc|1  
ATATATATCAGGTACTGTTGCAAGTGGGACTGTAGTGTTAACAATTTTTGTTGTGTTAGG  
>HPV91\_Alpha\_22023568\_nt5646\_L1\_Tile\_rc|1  
AGGTCCTGCTTGTGTATATATATCAGGTACTGTTGCAAGTGGGACTGTAGTGTTAACAAT  
>HPV91\_Alpha\_22023568\_nt5651\_L1\_Tile\_rc|1  
ATATCAGGTCTGCTTGTGTATATATATCAGGTACTGTTGCAAGTGGGACTGTAGTGTTA  
>HPV91\_Alpha\_22023568\_nt5656\_L1\_Tile\_rc|1  
ATGTAATATCAGGTCCTGCTTGTGTATATATATCAGGTACTGTTGCAAGTGGGACTGTAG  
>HPV91\_Alpha\_22023568\_nt5666\_L1\_Tile\_rc|1  
ACTGTAGGAAATGTAATATCAGGTCCTGCTTGTGTATATATATCAGGTACTGTTGCAAGT  
>HPV91\_Alpha\_22023568\_nt5676\_L1\_Tile\_rc|1  
ACTAAGTGGCACTGTAGGAAATGTAATATCAGGTCCTGCTTGTGTATATATATCAGGTAC  
>HPV91\_Alpha\_22023568\_nt5681\_L1\_Tile\_rc|1  
GGGACACTAAGTGGCACTGTAGGAAATGTAATATCAGGTCCTGCTTGTGTATATATATCA  
>HPV91\_Alpha\_22023568\_nt5691\_L1\_Tile\_rc|1  
TGGCACATAGGGGACACTAAGTGGCACTGTAGGAAATGTAATATCAGGTCCTGCTTGTGT  
>HPV91\_Alpha\_22023568\_nt5696\_L1\_Tile\_rc|1  
GACAATGGCACATAGGGGACACTAAGTGGCACTGTAGGAAATGTAATATCAGGTCCTGCT  
>HPV91\_Alpha\_22023568\_nt5706\_L1\_Tile\_rc|1  
AACAGACGGTGACAATGGCACATAGGGGACACTAAGTGGCACTGTAGGAAATGTAATATC  
>HPV91\_Alpha\_22023568\_nt5711\_L1\_Tile\_rc|1  
GGTGTAACAGACGGTGACAATGGCACATAGGGGACACTAAGTGGCACTGTAGGAAATGTA  
>HPV91\_Alpha\_22023568\_nt5716\_L1\_Tile\_rc|1  
CAGAAGGTGTAACAGACGGTGACAATGGCACATAGGGGACACTAAGTGGCACTGTAGGAA  
>HPV91\_Alpha\_22023568\_nt5726\_L1\_Tile\_rc|1  
ATTGATACTGCAGAAGGTGTAACAGACGGTGACAATGGCACATAGGGGACACTAAGTGGC

>HPV91\_Alpha\_22023568\_nt5731\_L1\_Tile\_rc|1  
CATATATTGATACTGCAGAAGGTGTAACAGACGGTGACAATGGCACATAGGGGACACTAA  
>HPV91\_Alpha\_22023568\_nt5736\_L1\_Tile\_rc|1  
TGTGCCATATATTGATACTGCAGAAGGTGTAACAGACGGTGACAATGGCACATAGGGGAC  
>HPV91\_Alpha\_22023568\_nt5751\_L1\_Tile\_rc|1  
ATGTAAATAAAAAATCTGTGCCATATATTGATACTGCAGAAGGTGTAACAGACGGTGACAA  
>HPV91\_Alpha\_22023568\_nt5761\_L1\_Tile\_rc|1  
ACAATGAAGGATGTAAATAAAAAATCTGTGCCATATATTGATACTGCAGAAGGTGTAACAG  
>HPV91\_Alpha\_22023568\_nt5971\_L1\_Tile\_rc|1  
ATTTTTTTATAGGAAAAAAAGGGTGGCCACAGCCAGTAAACGGGAACTGCCAGCATGGTA  
>HPV91\_Alpha\_22023568\_nt5976\_L1\_Tile\_rc|1  
GAATTATTTTTTATAGGAAAAAAAGGGTGGCCACAGCCAGTAAACGGGAACTGCCAGCA  
>HPV91\_Alpha\_22023568\_nt5981\_L1\_Tile\_rc|1  
TACCAGAATTATTTTTTATAGGAAAAAAAGGGTGGCCACAGCCAGTAAACGGGAACTGC  
>HPV91\_Alpha\_22023568\_nt5986\_L1\_Tile\_rc|1  
TACTTTACCAGAATTATTTTTTATAGGAAAAAAAGGGTGGCCACAGCCAGTAAACGGGA  
>HPV91\_Alpha\_22023568\_nt5991\_L1\_Tile\_rc|1  
ACAATTACTTTACCAGAATTATTTTTTATAGGAAAAAAAGGGTGGCCACAGCCAGTAAA  
>HPV91\_Alpha\_22023568\_nt6006\_L1\_Tile\_rc|1  
CCTGAAACTTTAGGAACAATTACTTTACCAGAATTATTTTTTATAGGAAAAAAAGGGTGG  
>HPV91\_Alpha\_22023568\_nt6011\_L1\_Tile\_rc|1  
GGTGACCTGAAACTTTAGGAACAATTACTTTACCAGAATTATTTTTTATAGGAAAAAAAG  
>HPV91\_Alpha\_22023568\_nt6561\_L1\_Tile\_rc|1  
CTACGTAAAAAGAAAAATAAACTATTTCCGTATGGCTCGGCTGCCATTTCCTAAATAATCT  
>HPV91\_Alpha\_22023568\_nt6651\_L1\_Tile\_rc|1  
TTGCCTGTTCCCTGCAATATACAAATCCTTAGGGACAGCATCGCCTGTAGTACCAGCCCTA  
>HPV91\_Alpha\_22023568\_nt6666\_L1\_Tile\_rc|1  
GCTATGTTCCGCTGTTGCCTGTTCCCTGCAATATACAAATCCTTAGGGACAGCATCGCCT  
>HPV91\_Alpha\_22023568\_nt6671\_L1\_Tile\_rc|1  
TGCCTGCTATGTTCCGCTGTTGCCTGTTCCCTGCAATATACAAATCCTTAGGGACAGCAT  
>HPV91\_Alpha\_22023568\_nt6676\_L1\_Tile\_rc|1  
TATACTGCCTGCTATGTTCCGCTGTTGCCTGTTCCCTGCAATATACAAATCCTTAGGGAC  
>HPV91\_Alpha\_22023568\_nt6681\_L1\_Tile\_rc|1  
TAATATATACTGCCTGCTATGTTCCGCTGTTGCCTGTTCCCTGCAATATACAAATCCTTA  
>HPV91\_Alpha\_22023568\_nt6686\_L1\_Tile\_rc|1  
TAGAATAATATATACTGCCTGCTATGTTCCGCTGTTGCCTGTTCCCTGCAATATACAAAT  
>HPV91\_Alpha\_22023568\_nt6691\_L1\_Tile\_rc|1  
AGGAGTAGAATAATATATACTGCCTGCTATGTTCCGCTGTTGCCTGTTCCCTGCAATATA  
>HPV91\_Alpha\_22023568\_nt6791\_L1\_Tile\_rc|1  
CCTGGTTACCAAAACAGATGCCGTTATTATGCCCTGTGCTTTTTGCATCCAAAGCGGTT  
>HPV91\_Alpha\_22023568\_nt6826\_L1\_Tile\_rc|1  
AGTGCTGCGAGTTGTATCCACAACAGTTACAAACACCTGGTTACCAAAACAGATGCCGTT  
>HPV91\_Alpha\_22023568\_nt6851\_L1\_Tile\_rc|1  
CAGTGATGCACACAAGGTTAAGTTAGTGCTGCGAGTTGTATCCACAACAGTTACAAACA  
>HPV91\_Alpha\_22023568\_nt6861\_L1\_Tile\_rc|1  
AGCACAGACTCAGTGGATGCACACAAGGTTAAGTTAGTGCTGCGAGTTGTATCCACAACA  
>HPV91\_Alpha\_22023568\_nt6866\_L1\_Tile\_rc|1  
TAGGTAGCACAGACTCAGTGGATGCACACAAGGTTAAGTTAGTGCTGCGAGTTGTATCCA  
>HPV91\_Alpha\_22023568\_nt6871\_L1\_Tile\_rc|1  
TGTAGTAGGTAGCACAGACTCAGTGGATGCACACAAGGTTAAGTTAGTGCTGCGAGTTGT  
>HPV91\_Alpha\_22023568\_nt6881\_L1\_Tile\_rc|1  
TGTTGTGCATATGTAGTAGGTAGCACAGACTCAGTGGATGCACACAAGGTTAAGTTAGTGC  
>HPV91\_Alpha\_22023568\_nt6886\_L1\_Tile\_rc|1  
CTTTGTGTTGTGCATATGTAGTAGGTAGCACAGACTCAGTGGATGCACACAAGGTTAAGTT  
>HPV91\_Alpha\_22023568\_nt6891\_L1\_Tile\_rc|1

TTGAACTTTGTGTTGTCATATGTAGTAGGTAGCACAGACTCAGTGGATGCACACAAGGTT  
>HPV91\_Alpha\_22023568\_nt6896\_L1\_Tile\_rc|1  
ATTCTTTGAACTTTGTGTTGTCATATGTAGTAGGTAGCACAGACTCAGTGGATGCACACA  
>HPV91\_Alpha\_22023568\_nt6901\_L1\_Tile\_rc|1  
TAAATATTCTTTGAACTTTGTGTTGTCATATGTAGTAGGTAGCACAGACTCAGTGGATGC  
>HPV91\_Alpha\_22023568\_nt6906\_L1\_Tile\_rc|1  
TGCCTTAAATATTCTTTGAACTTTGTGTTGTCATATGTAGTAGGTAGCACAGACTCAGTG  
>HPV91\_Alpha\_22023568\_nt6911\_L1\_Tile\_rc|1  
CTGCATGCCCTTAAATATTCTTTGAACTTTGTGTTGTCATATGTAGTAGGTAGCACAGACT  
>HPV91\_Alpha\_22023568\_nt6986\_L1\_Tile\_rc|1  
TGTGGATGTATGTCATTACCTCTGGATTAAGTGTTATAATGCATAATTGAAATATAAACT  
>HPV91\_Alpha\_22023568\_nt7001\_L1\_Tile\_rc|1  
ATGATGCATCCATAGTGTGGATGTATGTCATTACCTCTGGATTAAGTGTTATAATGCATA  
>HPV91\_Alpha\_22023568\_nt7006\_L1\_Tile\_rc|1  
TAATAATGATGCATCCATAGTGTGGATGTATGTCATTACCTCTGGATTAAGTGTTATAAT  
>HPV91\_Alpha\_22023568\_nt7011\_L1\_Tile\_rc|1  
TCTTCTAATAATGATGCATCCATAGTGTGGATGTATGTCATTACCTCTGGATTAAGTGTT  
>HPV91\_Alpha\_22023568\_nt7026\_L1\_Tile\_rc|1  
ACCCCAAAGTTCAGTCTTCTAATAATGATGCATCCATAGTGTGGATGTATGTCATTACC  
>HPV91\_Alpha\_22023568\_nt7051\_L1\_Tile\_rc|1  
TAGTGATGCCGTGGCTGGAGGGGATACCCCAAAGTTCAGTCTTCTAATAATGATGCATC  
>HPV91\_Alpha\_22023568\_nt7076\_L1\_Tile\_rc|1  
TAGCCAAAAAGCGATAAGTATCCTCTAGTGATGCCGTGGCTGGAGGGGATACCCCAAAGT  
>HPV91\_Alpha\_22023568\_nt7081\_L1\_Tile\_rc|1  
CTTATTAGCCAAAAAGCGATAAGTATCCTCTAGTGATGCCGTGGCTGGAGGGGATACCCC  
>HPV91\_Alpha\_22023568\_nt7086\_L1\_Tile\_rc|1  
ATTGCCTTATTAGCCAAAAAGCGATAAGTATCCTCTAGTGATGCCGTGGCTGGAGGGGAT  
>HPV91\_Alpha\_22023568\_nt7131\_L1\_Tile\_rc|1  
TATGGGTCTCTTTGGCTTTTGGTGGGACATTTTTTTTGACAGGCAATTGCCTTATTAGCC  
>HPV91\_Alpha\_22023568\_nt7136\_L1\_Tile\_rc|1  
TTTTGTATGGGTCTCTTTGGCTTTTGGTGGGACATTTTTTTTGACAGGCAATTGCCTTAT  
>HPV91\_Alpha\_22023568\_nt7141\_L1\_Tile\_rc|1  
ATAGTTTTTTGTATGGGTCTCTTTGGCTTTTGGTGGGACATTTTTTTTGACAGGCAATTGC  
>HPV91\_Alpha\_22023568\_nt7146\_L1\_Tile\_rc|1  
AAAGTATAGTTTTTTGTATGGGTCTCTTTGGCTTTTGGTGGGACATTTTTTTTGACAGGCA  
>HPV91\_Alpha\_22023568\_nt7166\_L1\_Tile\_rc|1  
CGGTAAGATCCACATCCCAAAAAGTATAGTTTTTTGTATGGGTCTCTTTGGCTTTTGGTG  
>HPV91\_Alpha\_22023568\_nt7171\_L1\_Tile\_rc|1  
CCTTTTCGGTAAGATCCACATCCCAAAAAGTATAGTTTTTTGTATGGGTCTCTTTGGCTTT  
>HPV91\_Alpha\_22023568\_nt7316\_L1\_Tile\_rc|1  
GCTTAGTTTTCTTTCGTTTGGAGGCAGGCGCTGAACTGGAGGATGGTGCTGCACGCTTCC  
>HPV92\_Beta\_27531786\_nt5719\_L1\_Tile\_rc|1  
CCAAGTGTGAGGCGATCACTATTTGCATGATAAAAGATGTTGGTCTTTGAACAAAT  
>HPV92\_Beta\_27531786\_nt5729\_L1\_Tile\_rc|1  
ATAAGGGTGTCCAAGTGTGAGGCGATCACTATTTGCATGATAAAAGATGTTGGTCTCT  
>HPV92\_Beta\_27531786\_nt5754\_L1\_Tile\_rc|1  
GATCAAGTGTGAGCTTCTCACTTCAAAATAAGGGTGTCCAAGTGTGAGGCGATCACTAT  
>HPV92\_Beta\_27531786\_nt5759\_L1\_Tile\_rc|1  
ATGTGGATCAAGTGTGAGCTTCTCACTTCAAAATAAGGGTGTCCAAGTGTGAGGCGATC  
>HPV92\_Beta\_27531786\_nt5764\_L1\_Tile\_rc|1  
ACATCATGTGGATCAAGTGTGAGCTTCTCACTTCAAAATAAGGGTGTCCAAGTGTGAGGCG  
>HPV92\_Beta\_27531786\_nt5769\_L1\_Tile\_rc|1  
CTAATACATCATGTGGATCAAGTGTGAGCTTCTCACTTCAAAATAAGGGTGTCCAAGTGTCA  
>HPV92\_Beta\_27531786\_nt5774\_L1\_Tile\_rc|1  
AGGCACTAATACATCATGTGGATCAAGTGTGAGCTTCTCACTTCAAAATAAGGGTGTCCAAC

>HPV92\_Beta\_27531786\_nt5779\_L1\_Tile\_rc|1  
ACCTTAGGCACTAATACATCATGTGGATCAACTGAGCTTCTCACTTCAAAATAAGGGTGT  
>HPV92\_Beta\_27531786\_nt5799\_L1\_Tile\_rc|1  
CTCTAAACTGATTCCCTGACACCTTAGGCACTAATACATCATGTGGATCAACTGAGCTTC  
>HPV92\_Beta\_27531786\_nt6034\_L1\_Tile\_rc|1  
GGATCAAAAGATGTGTTTACTCTGTTCATCCTTTGTTCCAGTATTGTACTTATTTGGATTT  
>HPV92\_Beta\_27531786\_nt6039\_L1\_Tile\_rc|1  
GCTTTGGATCAAAAGATGTGTTTACTCTGTTCATCCTTTGTTCCAGTATTGTACTTATTTG  
>HPV92\_Beta\_27531786\_nt6044\_L1\_Tile\_rc|1  
AATTTGCTTTGGATCAAAAGATGTGTTTACTCTGTTCATCCTTTGTTCCAGTATTGTACTT  
>HPV92\_Beta\_27531786\_nt6049\_L1\_Tile\_rc|1  
AACTGAATTTGCTTTGGATCAAAAGATGTGTTTACTCTGTTCATCCTTTGTTCCAGTATTG  
>HPV92\_Beta\_27531786\_nt6059\_L1\_Tile\_rc|1  
TAAACAAATAACTGAATTTGCTTTGGATCAAAAGATGTGTTTACTCTGTTCATCCTTTGT  
>HPV92\_Beta\_27531786\_nt6064\_L1\_Tile\_rc|1  
CATCCTAAACAAATAACTGAATTTGCTTTGGATCAAAAGATGTGTTTACTCTGTTCATCC  
>HPV92\_Beta\_27531786\_nt6069\_L1\_Tile\_rc|1  
GTGTACATCCTAAACAAATAACTGAATTTGCTTTGGATCAAAAGATGTGTTTACTCTGT  
>HPV92\_Beta\_27531786\_nt6084\_L1\_Tile\_rc|1  
GTTACCTAAGCATGGTGTACATCCTAAACAAATAACTGAATTTGCTTTGGATCAAAAG  
>HPV92\_Beta\_27531786\_nt6119\_L1\_Tile\_rc|1  
TTGCTTTTCAGCACATGGTAAGGCTGTGTCCCAATGTTACCTAAGCATGGTGTACATCC  
>HPV92\_Beta\_27531786\_nt6139\_L1\_Tile\_rc|1  
GGGCATCCCCAGTATCTGGTTGCTTTTCAGCACATGGTAAGGCTGTGTCCCAATGTTCA  
>HPV92\_Beta\_27531786\_nt6154\_L1\_Tile\_rc|1  
TTTAACTCTAATGGTGGGCATCCCCAGTATCTGGTTGCTTTTCAGCACATGGTAAGGCT  
>HPV92\_Beta\_27531786\_nt6159\_L1\_Tile\_rc|1  
TGTTTTTTTAACTCTAATGGTGGGCATCCCCAGTATCTGGTTGCTTTTCAGCACATGGTA  
>HPV92\_Beta\_27531786\_nt6164\_L1\_Tile\_rc|1  
AACAGTGTTTTTTAACTCTAATGGTGGGCATCCCCAGTATCTGGTTGCTTTTCAGCACA  
>HPV92\_Beta\_27531786\_nt6169\_L1\_Tile\_rc|1  
GAGATAACAGTGTTTTTTTAACTCTAATGGTGGGCATCCCCAGTATCTGGTTGCTTTTCA  
>HPV92\_Beta\_27531786\_nt6174\_L1\_Tile\_rc|1  
CATCAGAGATAACAGTGTTTTTTTAACTCTAATGGTGGGCATCCCCAGTATCTGGTTGCT  
>HPV92\_Beta\_27531786\_nt6179\_L1\_Tile\_rc|1  
ATCTCCATCAGAGATAACAGTGTTTTTTTAACTCTAATGGTGGGCATCCCCAGTATCTGG  
>HPV92\_Beta\_27531786\_nt6224\_L1\_Tile\_rc|1  
TGATAAGGCCTTAAATTCATATTACCGAAGCCTATGTCAACCATATCTCCATCAGAGAT  
>HPV92\_Beta\_27531786\_nt6229\_L1\_Tile\_rc|1  
GTTACTGATAAGGCCTTAAATTCATATTACCGAAGCCTATGTCAACCATATCTCCATCA  
>HPV92\_Beta\_27531786\_nt6234\_L1\_Tile\_rc|1  
ATTTGGTTACTGATAAGGCCTTAAATTCATATTACCGAAGCCTATGTCAACCATATCTC  
>HPV92\_Beta\_27531786\_nt6239\_L1\_Tile\_rc|1  
GTCAGATTTGGTTACTGATAAGGCCTTAAATTCATATTACCGAAGCCTATGTCAACCAT  
>HPV92\_Beta\_27531786\_nt6244\_L1\_Tile\_rc|1  
CTTACGTCAGATTTGGTTACTGATAAGGCCTTAAATTCATATTACCGAAGCCTATGTCA  
>HPV92\_Beta\_27531786\_nt6249\_L1\_Tile\_rc|1  
CCAACTTACGTCAGATTTGGTTACTGATAAGGCCTTAAATTCATATTACCGAAGCCTA  
>HPV92\_Beta\_27531786\_nt6254\_L1\_Tile\_rc|1  
TATATCCAACTTACGTCAGATTTGGTTACTGATAAGGCCTTAAATTCATATTACCGAA  
>HPV92\_Beta\_27531786\_nt6259\_L1\_Tile\_rc|1  
TCTACTATATCCAACTTACGTCAGATTTGGTTACTGATAAGGCCTTAAATTCATATTA  
>HPV92\_Beta\_27531786\_nt6264\_L1\_Tile\_rc|1  
TGGAGTCTACTATATCCAACTTACGTCAGATTTGGTTACTGATAAGGCCTTAAATTC  
>HPV92\_Beta\_27531786\_nt6394\_L1\_Tile\_rc|1

ATGGTATCACCCACAACACCACCGCGCACAAACATATGCCTAACATAACATTGTTCTCGT  
>HPV92\_Beta\_27531786\_nt6399\_L1\_Tile\_rc|1  
CTGGGATGGTATCACCCACAACACCACCGCGCACAAACATATGCCTAACATAACATTGTT  
>HPV92\_Beta\_27531786\_nt6439\_L1\_Tile\_rc|1  
GCAGGTAACATAAAGTTATGGTCTTCATTTACAACCTGCATCTGGGATGGTATCACCCACA  
>HPV92\_Beta\_27531786\_nt6454\_L1\_Tile\_rc|1  
TGGTCACTGGATGCTGCAGGTAACATAAAGTTATGGTCTTCATTTACAACCTGCATCTGGG  
>HPV92\_Beta\_27531786\_nt6459\_L1\_Tile\_rc|1  
TAGACTGGTCACTGGATGCTGCAGGTAACATAAAGTTATGGTCTTCATTTACAACCTGCAT  
>HPV92\_Beta\_27531786\_nt6469\_L1\_Tile\_rc|1  
ATTTGACTTCTAGACTGGTCACTGGATGCTGCAGGTAACATAAAGTTATGGTCTTCATTT  
>HPV92\_Beta\_27531786\_nt6474\_L1\_Tile\_rc|1  
TGGCAATTTGACTTCTAGACTGGTCACTGGATGCTGCAGGTAACATAAAGTTATGGTCTT  
>HPV92\_Beta\_27531786\_nt6479\_L1\_Tile\_rc|1  
AGAACTGGCAATTTGACTTCTAGACTGGTCACTGGATGCTGCAGGTAACATAAAGTTATG  
>HPV92\_Beta\_27531786\_nt6489\_L1\_Tile\_rc|1  
GGAAATAGATAGAAGCTGGCAATTTGACTTCTAGACTGGTCACTGGATGCTGCAGGTAACA  
>HPV92\_Beta\_27531786\_nt6499\_L1\_Tile\_rc|1  
CTAACAGTAGGGAAATAGATAGAAGCTGGCAATTTGACTTCTAGACTGGTCACTGGATGCT  
>HPV92\_Beta\_27531786\_nt6644\_L1\_Tile\_rc|1  
AATATTAAAGTTAGTATTCTCGGTATTATCACAACTGTCAGAAACAGTTCATTACTCCA  
>HPV92\_Beta\_27531786\_nt6649\_L1\_Tile\_rc|1  
ACACTAATATTAAAGTTAGTATTCTCGGTATTATCACAACTGTCAGAAACAGTTCATTA  
>HPV92\_Beta\_27531786\_nt6654\_L1\_Tile\_rc|1  
TAGGGACACTAATATTAAAGTTAGTATTCTCGGTATTATCACAACTGTCAGAAACAGTT  
>HPV92\_Beta\_27531786\_nt6659\_L1\_Tile\_rc|1  
TTCCTTAGGGACACTAATATTAAAGTTAGTATTCTCGGTATTATCACAACTGTCAGAAA  
>HPV92\_Beta\_27531786\_nt6664\_L1\_Tile\_rc|1  
CCACCTTCCTTAGGGACACTAATATTAAAGTTAGTATTCTCGGTATTATCACAACTGTC  
>HPV92\_Beta\_27531786\_nt6669\_L1\_Tile\_rc|1  
TTTGACCACCTTCCTTAGGGACACTAATATTAAAGTTAGTATTCTCGGTATTATCACAAA  
>HPV92\_Beta\_27531786\_nt6674\_L1\_Tile\_rc|1  
GGTTATTTGACCACCTTCCTTAGGGACACTAATATTAAAGTTAGTATTCTCGGTATTATC  
>HPV92\_Beta\_27531786\_nt6679\_L1\_Tile\_rc|1  
TAGTCGGTTATTTGACCACCTTCCTTAGGGACACTAATATTAAAGTTAGTATTCTCGGTA  
>HPV92\_Beta\_27531786\_nt6684\_L1\_Tile\_rc|1  
AATCATAGTCGGTTATTTGACCACCTTCCTTAGGGACACTAATATTAAAGTTAGTATTCC  
>HPV92\_Beta\_27531786\_nt6689\_L1\_Tile\_rc|1  
TTGTGAATCATAGTCGGTTATTTGACCACCTTCCTTAGGGACACTAATATTAAAGTTAGT  
>HPV92\_Beta\_27531786\_nt6694\_L1\_Tile\_rc|1  
ATCTTTTGTGAATCATAGTCGGTTATTTGACCACCTTCCTTAGGGACACTAATATTAAAG  
>HPV92\_Beta\_27531786\_nt6699\_L1\_Tile\_rc|1  
CTCTAATCTTTTGTGAATCATAGTCGGTTATTTGACCACCTTCCTTAGGGACACTAATAT  
>HPV92\_Beta\_27531786\_nt6704\_L1\_Tile\_rc|1  
GTATTCTCTAATCTTTTGTGAATCATAGTCGGTTATTTGACCACCTTCCTTAGGGACACT  
>HPV92\_Beta\_27531786\_nt6709\_L1\_Tile\_rc|1  
CTAGTGTATTCTCTAATCTTTTGTGAATCATAGTCGGTTATTTGACCACCTTCCTTAGGG  
>HPV92\_Beta\_27531786\_nt6719\_L1\_Tile\_rc|1  
TTCAACATGTCTAGTGTATTCTCTAATCTTTTGTGAATCATAGTCGGTTATTTGACCACC  
>HPV92\_Beta\_27531786\_nt6724\_L1\_Tile\_rc|1  
TATTCTTCAACATGTCTAGTGTATTCTCTAATCTTTTGTGAATCATAGTCGGTTATTTGA  
>HPV92\_Beta\_27531786\_nt6739\_L1\_Tile\_rc|1  
ATTAGTGATATTTTCATATTCTTCAACATGTCTAGTGTATTCTCTAATCTTTTGTGAATCA  
>HPV92\_Beta\_27531786\_nt6894\_L1\_Tile\_rc|1  
GTGTTGCTTTAGAATGAATAAATCTGTATGCATCCTGAATAGGGTTATCTGGAGTAGGAA



>HPV92\_Beta\_27531786\_nt6899\_L1\_Tile\_rc|1  
ACAAGGTGTTGCTTTAGAATGAATAAATCTGTATGCATCCTGAATAGGGTTATCTGGAGT  
>HPV92\_Beta\_27531786\_nt6904\_L1\_Tile\_rc|1  
TCTGGACAAGGTGTTGCTTTAGAATGAATAAATCTGTATGCATCCTGAATAGGGTTATCT  
>HPV92\_Beta\_27531786\_nt7059\_L1\_Tile\_rc|1  
GACCATTAACAGATGTATTAGTTAATCCAGCTTGAAATAAAAAATTTTCTACCCAATGAAT  
>HPV92\_Beta\_27531786\_nt7064\_L1\_Tile\_rc|1  
TTTAAGACCATTAACAGATGTATTAGTTAATCCAGCTTGAAATAAAAAATTTTCTACCCAA  
>HPV92\_Beta\_27531786\_nt7069\_L1\_Tile\_rc|1  
GTTCTTTTAAAGACCATTAACAGATGTATTAGTTAATCCAGCTTGAAATAAAAAATTTTCTA  
>HPV92\_Beta\_27531786\_nt7074\_L1\_Tile\_rc|1  
TTCTAGTTCTTTTAAAGACCATTAACAGATGTATTAGTTAATCCAGCTTGAAATAAAAAAT  
>HPV92\_Beta\_27531786\_nt7084\_L1\_Tile\_rc|1  
TGAGAACTGCTTCTAGTTCTTTTAAAGACCATTAACAGATGTATTAGTTAATCCAGCTTGA  
>HPV92\_Beta\_27531786\_nt7089\_L1\_Tile\_rc|1  
CTCTTTGAGAACTGCTTCTAGTTCTTTTAAAGACCATTAACAGATGTATTAGTTAATCCAG  
>HPV92\_Beta\_27531786\_nt7094\_L1\_Tile\_rc|1  
AGTACCTCTTTGAGAACTGCTTCTAGTTCTTTTAAAGACCATTAACAGATGTATTAGTTAA  
>HPV92\_Beta\_27531786\_nt7099\_L1\_Tile\_rc|1  
CGTTTAGTACCTCTTTGAGAACTGCTTCTAGTTCTTTTAAAGACCATTAACAGATGTATTA  
>HPV92\_Beta\_27531786\_nt7104\_L1\_Tile\_rc|1  
TTTTTCGTTTAGTACCTCTTTGAGAACTGCTTCTAGTTCTTTTAAAGACCATTAACAGATG  
>HPV92\_Beta\_27531786\_nt7109\_L1\_Tile\_rc|1  
TTTTCTTTTTTCGTTTAGTACCTCTTTGAGAACTGCTTCTAGTTCTTTTAAAGACCATTAAC  
>HPV92\_Beta\_27531786\_nt7114\_L1\_Tile\_rc|1  
TTACTTTTTCTTTTTTCGTTTAGTACCTCTTTGAGAACTGCTTCTAGTTCTTTTAAAGACCA  
>HPV92\_Beta\_27531786\_nt7118\_L1\_Tile\_rc|1  
TTAGTTACTTTTTCTTTTTTCGTTTAGTACCTCTTTGAGAACTGCTTCTAGTTCTTTTAAAG  
>HPV93\_Beta\_37089393\_nt5771\_L1\_Tile\_rc|1  
GTACTTCCAATACTGTTCCATTATTATTGTAAACATTGTAATATGGGTGACCTACTGTTA  
>HPV93\_Beta\_37089393\_nt5776\_L1\_Tile\_rc|1  
CTTTGGTACTTCCAATACTGTTCCATTATTATTGTAAACATTGTAATATGGGTGACCTAC  
>HPV93\_Beta\_37089393\_nt6016\_L1\_Tile\_rc|1  
ATCATCAGTAGAAAATGCCTGAGTTCTGTAATTTAAAGGATTTTCTGTATCATTTACCTT  
>HPV93\_Beta\_37089393\_nt6146\_L1\_Tile\_rc|1  
GTGGGCAAATCCCATTTTGGTCATTGGCTCCATCACATTTAGGTGCAACATCCCAGTGTT  
>HPV93\_Beta\_37089393\_nt6151\_L1\_Tile\_rc|1  
TATAGGTGGGCAAATCCCATTTTGGTCATTGGCTCCATCACATTTAGGTGCAACATCCCA  
>HPV93\_Beta\_37089393\_nt6161\_L1\_Tile\_rc|1  
TTACTAATTGTATAGGTGGGCAAATCCCATTTTGGTCATTGGCTCCATCACATTTAGGTG  
>HPV93\_Beta\_37089393\_nt6166\_L1\_Tile\_rc|1  
AGTGTTTACTAATTGTATAGGTGGGCAAATCCCATTTTGGTCATTGGCTCCATCACATTT  
>HPV93\_Beta\_37089393\_nt6176\_L1\_Tile\_rc|1  
CTTGAATAACAGTGTTTACTAATTGTATAGGTGGGCAAATCCCATTTTGGTCATTGGCTC  
>HPV93\_Beta\_37089393\_nt6206\_L1\_Tile\_rc|1  
TACCATACCCGATATCTGCCATATCCCATCTTGAATAACAGTGTTTACTAATTGTATAG  
>HPV93\_Beta\_37089393\_nt6211\_L1\_Tile\_rc|1  
AAGATTACCATACCCGATATCTGCCATATCCCATCTTGAATAACAGTGTTTACTAATTG  
>HPV93\_Beta\_37089393\_nt6236\_L1\_Tile\_rc|1  
TATTTTCCTGCAAAGCCTTAAAATTAAGATTACCATACCCGATATCTGCCATATCCCAT  
>HPV93\_Beta\_37089393\_nt6251\_L1\_Tile\_rc|1  
GACTAACATCAGATCTATTTTCCTGCAAAGCCTTAAAATTAAGATTACCATACCCGATAT  
>HPV93\_Beta\_37089393\_nt6256\_L1\_Tile\_rc|1  
GTCAAGACTAACATCAGATCTATTTTCCTGCAAAGCCTTAAAATTAAGATTACCATACCC  
>HPV93\_Beta\_37089393\_nt6421\_L1\_Tile\_rc|1

TGCGTCTATTTGTTTACCAGGAATGTCATCTCCTACGTTGCCACCTCTTACAAAAAGTG  
>HPV93\_Beta\_37089393\_nt6426\_L1\_Tile\_rc|1  
GTGCCTGCGTCTATTTGTTTACCAGGAATGTCATCTCCTACGTTGCCACCTCTTACAAAA  
>HPV93\_Beta\_37089393\_nt6431\_L1\_Tile\_rc|1  
TATATGTGCCTGCGTCTATTTGTTTACCAGGAATGTCATCTCCTACGTTGCCACCTCTTA  
>HPV93\_Beta\_37089393\_nt6436\_L1\_Tile\_rc|1  
ATTTTTATATGTGCCTGCGTCTATTTGTTTACCAGGAATGTCATCTCCTACGTTGCCACC  
>HPV93\_Beta\_37089393\_nt6441\_L1\_Tile\_rc|1  
AAATCATTTTTATATGTGCCTGCGTCTATTTGTTTACCAGGAATGTCATCTCCTACGTTG  
>HPV93\_Beta\_37089393\_nt6446\_L1\_Tile\_rc|1  
TGTA AAAATCATTTTTATATGTGCCTGCGTCTATTTGTTTACCAGGAATGTCATCTCCTA  
>HPV93\_Beta\_37089393\_nt6681\_L1\_Tile\_rc|1  
ATTTTCCCAGGGTCTGTATAAACACTAATACTGAAGTTTGTGTTTCTTGTGTTGTCTACA  
>HPV93\_Beta\_37089393\_nt6686\_L1\_Tile\_rc|1  
CCCTTATTTTCCCAGGGTCTGTATAAACACTAATACTGAAGTTTGTGTTTCTTGTGTTGT  
>HPV93\_Beta\_37089393\_nt6691\_L1\_Tile\_rc|1  
TATATCCCTTATTTTCCCAGGGTCTGTATAAACACTAATACTGAAGTTTGTGTTTCTTGT  
>HPV93\_Beta\_37089393\_nt6696\_L1\_Tile\_rc|1  
TCATTTATATCCCTTATTTTCCCAGGGTCTGTATAAACACTAATACTGAAGTTTGTGTTT  
>HPV93\_Beta\_37089393\_nt6891\_L1\_Tile\_rc|1  
CGATAAGTACTCTGTAACGGATTGTCTGGAGTTGGGACAAACCCTAATTGCCATTCTCT  
>HPV93\_Beta\_37089393\_nt6896\_L1\_Tile\_rc|1  
TATATCGATAAGTACTCTGTAACGGATTGTCTGGAGTTGGGACAAACCCTAATTGCCATT  
>HPV93\_Beta\_37089393\_nt6901\_L1\_Tile\_rc|1  
ATTAATATATCGATAAGTACTCTGTAACGGATTGTCTGGAGTTGGGACAAACCCTAATTG  
>HPV93\_Beta\_37089393\_nt6906\_L1\_Tile\_rc|1  
AAACTATTAATATATCGATAAGTACTCTGTAACGGATTGTCTGGAGTTGGGACAAACCCT  
>HPV93\_Beta\_37089393\_nt6911\_L1\_Tile\_rc|1  
TAGCTAAACTATTAATATATCGATAAGTACTCTGTAACGGATTGTCTGGAGTTGGGACAA  
>HPV93\_Beta\_37089393\_nt6916\_L1\_Tile\_rc|1  
TGGTGTAGCTAAACTATTAATATATCGATAAGTACTCTGTAACGGATTGTCTGGAGTTGG  
>HPV93\_Beta\_37089393\_nt6921\_L1\_Tile\_rc|1  
GGACATGGTGTAGCTAAACTATTAATATATCGATAAGTACTCTGTAACGGATTGTCTGGA  
>HPV93\_Beta\_37089393\_nt6926\_L1\_Tile\_rc|1  
TATCGGGACATGGTGTAGCTAAACTATTAATATATCGATAAGTACTCTGTAACGGATTGT  
>HPV93\_Beta\_37089393\_nt6931\_L1\_Tile\_rc|1  
AACCTTATCGGGACATGGTGTAGCTAAACTATTAATATATCGATAAGTACTCTGTAACGG  
>HPV93\_Beta\_37089393\_nt6941\_L1\_Tile\_rc|1  
CCTTTGGTGGAACCTTATCGGGACATGGTGTAGCTAAACTATTAATATATCGATAAGTAC  
>HPV93\_Beta\_37089393\_nt6951\_L1\_Tile\_rc|1  
TCTTCCTTTTCTTTGGTGGAACCTTATCGGGACATGGTGTAGCTAAACTATTAATATAT  
>HPV93\_Beta\_37089393\_nt7066\_L1\_Tile\_rc|1  
TGATTGTACAAGATTTGCCTGATACAGAAATTTGCGCCCTAAGGAGTATTGATCTAGATC  
>HPV93\_Beta\_37089393\_nt7076\_L1\_Tile\_rc|1  
GTTTAGCTGGTGATTGTACAAGATTTGCCTGATACAGAAATTTGCGCCCTAAGGAGTATT  
>HPV93\_Beta\_37089393\_nt7086\_L1\_Tile\_rc|1  
GATGATGACCGTTTAGCTGGTGATTGTACAAGATTTGCCTGATACAGAAATTTGCGCCCT  
>HPV93\_Beta\_37089393\_nt7091\_L1\_Tile\_rc|1  
AAATAGATGATGACCGTTTAGCTGGTGATTGTACAAGATTTGCCTGATACAGAAATTTGC  
>HPV93\_Beta\_37089393\_nt7096\_L1\_Tile\_rc|1  
TCGAGAAATAGATGATGACCGTTTAGCTGGTGATTGTACAAGATTTGCCTGATACAGAAA  
>HPV93\_Beta\_37089393\_nt7101\_L1\_Tile\_rc|1  
GTTCTCGAGAAATAGATGATGACCGTTTAGCTGGTGATTGTACAAGATTTGCCTGATAC  
>HPV93\_Beta\_37089393\_nt7111\_L1\_Tile\_rc|1  
TTTTCTTTTAGTTCCTCGAGAAATAGATGATGACCGTTTAGCTGGTGATTGTACAAGATT

>HPV93\_Beta\_37089393\_nt7121\_L1\_Tile\_rc|1  
ATTTGCTTCTTTTCTTTTCTTTAGTTCCCTCGAGAAATAGATGATGACCGTTTAGCTGGTGATT  
>HPV93\_Beta\_37089393\_nt7123\_L1\_Tile\_rc|1  
TTATTTGCTTCTTTTCTTTTCTTTAGTTCCCTCGAGAAATAGATGATGACCGTTTAGCTGGTGA  
>HPV94\_Alpha\_40804528\_nt6540\_L1\_Tile\_rc|1  
TTAGAGTGTCTCAGGAATGGTGTCTCCCACTGCACTGGCTCTATTGAAAAAATGTCTTGCAA  
>HPV94\_Alpha\_40804528\_nt6545\_L1\_Tile\_rc|1  
CAATATTAGAGTGTCTCAGGAATGGTGTCTCCCACTGCACTGGCTCTATTGAAAAAATGTCT  
>HPV94\_Alpha\_40804528\_nt6550\_L1\_Tile\_rc|1  
GACTTCAATATTAGAGTGTCTCAGGAATGGTGTCTCCCACTGCACTGGCTCTATTGAAAAA  
>HPV94\_Alpha\_40804528\_nt6555\_L1\_Tile\_rc|1  
CGGCCGACTTCAATATTAGAGTGTCTCAGGAATGGTGTCTCCCACTGCACTGGCTCTATTGA  
>HPV94\_Alpha\_40804528\_nt6575\_L1\_Tile\_rc|1  
ACCAACGTTTGGTCTCACCACCGCCGACTTCAATATTAGAGTGTCTCAGGAATGGTGTCTCC  
>HPV94\_Alpha\_40804528\_nt7035\_L1\_Tile\_rc|1  
GATCTTGCTTTTCTAGTGGGGGTGCCTCCTTCTGACAAGTTATTGCGGAGGACGACAAGA  
>HPV95\_Gamma\_40804520\_nt5534\_L1\_Tile\_rc|1  
AAAGACTCTATATTGACTTCCAGATACCTTTGGAACATAAACTTTCTTAGGTTACCTAC  
>HPV95\_Gamma\_40804520\_nt5539\_L1\_Tile\_rc|1  
AACCTAAAGACTCTATATTGACTTCCAGATACCTTTGGAACATAAACTTTCTTAGGTTCA  
>HPV95\_Gamma\_40804520\_nt5544\_L1\_Tile\_rc|1  
ATTGAAACCTAAAGACTCTATATTGACTTCCAGATACCTTTGGAACATAAACTTTCTTAG  
>HPV95\_Gamma\_40804520\_nt5579\_L1\_Tile\_rc|1  
ATTATCTATCAAAGCAAATCTGTTAGGATCTGGCAATTGAAACCTAAAGACTCTATATTG  
>HPV95\_Gamma\_40804520\_nt5624\_L1\_Tile\_rc|1  
TCTTAGACGCCATACTAACCTTTTCATGGTCTCAGAGTCATAAAAGCCATTATCTATCAAAGC  
>HPV95\_Gamma\_40804520\_nt5629\_L1\_Tile\_rc|1  
ATTCTCTTAGACGCCATACTAACCTTTTCATGGTCTCAGAGTCATAAAAGCCATTATCTATC  
>HPV95\_Gamma\_40804520\_nt5634\_L1\_Tile\_rc|1  
TTTCAATTCTCTTAGACGCCATACTAACCTTTTCATGGTCTCAGAGTCATAAAAGCCATTAT  
>HPV95\_Gamma\_40804520\_nt5654\_L1\_Tile\_rc|1  
TAAAGGTCCACCTCGGCCTATTTCAATTCTCTTAGACGCCATACTAACCTTTTCATGGTCT  
>HPV95\_Gamma\_40804520\_nt5804\_L1\_Tile\_rc|1  
AGCTGGAATACAACCAATTATGAACATTTGGGTCTGTTTAGGGTCTAATGAGACATCCTG  
>HPV95\_Gamma\_40804520\_nt5839\_L1\_Tile\_rc|1  
CTGCATGCCTCAGCTTTATCCCAGTGCTCCCCAATAGCTGGAATACAACCAATTATGAAC  
>HPV95\_Gamma\_40804520\_nt5844\_L1\_Tile\_rc|1  
GTTCTCTGCATGCCTCAGCTTTATCCCAGTGCTCCCCAATAGCTGGAATACAACCAATTA  
>HPV95\_Gamma\_40804520\_nt5894\_L1\_Tile\_rc|1  
GTATGTGTTTACAAGTTCTATAGGTGGGCAATCACCTTCTGAGGTGCTGGTTCTCTGCA  
>HPV95\_Gamma\_40804520\_nt6014\_L1\_Tile\_rc|1  
GAAGTCAGGCCATTTACACAAAGTACCAACTACATCTAATGGTGCCTGGATTTATCATC  
>HPV95\_Gamma\_40804520\_nt6019\_L1\_Tile\_rc|1  
TTTAAGAAGTCAGGCCATTTACACAAAGTACCAACTACATCTAATGGTGCCTGGATTTA  
>HPV95\_Gamma\_40804520\_nt6034\_L1\_Tile\_rc|1  
ATGTCCTTACTCATCTTTAAGAAGTCAGGCCATTTACACAAAGTACCAACTACATCTAAT  
>HPV95\_Gamma\_40804520\_nt6039\_L1\_Tile\_rc|1  
CATAAATGTCCTTACTCATCTTTAAGAAGTCAGGCCATTTACACAAAGTACCAACTACAT  
>HPV95\_Gamma\_40804520\_nt6044\_L1\_Tile\_rc|1  
GTCACCATAAATGTCCTTACTCATCTTTAAGAAGTCAGGCCATTTACACAAAGTACCAAC  
>HPV95\_Gamma\_40804520\_nt6049\_L1\_Tile\_rc|1  
AAACTGTCACCATAAATGTCCTTACTCATCTTTAAGAAGTCAGGCCATTTACACAAAGTA  
>HPV95\_Gamma\_40804520\_nt6054\_L1\_Tile\_rc|1  
AGAATAAACTGTCACCATAAATGTCCTTACTCATCTTTAAGAAGTCAGGCCATTTACACA  
>HPV95\_Gamma\_40804520\_nt6064\_L1\_Tile\_rc|1

CGGCCAAAGAAGAATAAACTGTCACCATAAAATGTCCTTACTCATCTTTAAGAAGTCAGGC  
>HPV95\_Gamma\_40804520\_nt6069\_L1\_Tile\_rc|1  
CCCTTCGGCCAAAGAAGAATAAACTGTCACCATAAAATGTCCTTACTCATCTTTAAGAAGT  
>HPV95\_Gamma\_40804520\_nt6074\_L1\_Tile\_rc|1  
CTGTTCCCTTCGGCCAAAGAAGAATAAACTGTCACCATAAAATGTCCTTACTCATCTTTAA  
>HPV95\_Gamma\_40804520\_nt6079\_L1\_Tile\_rc|1  
TAAAGCTGTTCCCTTCGGCCAAAGAAGAATAAACTGTCACCATAAAATGTCCTTACTCATC  
>HPV95\_Gamma\_40804520\_nt6084\_L1\_Tile\_rc|1  
TTGCATAAAGCTGTTCCCTTCGGCCAAAGAAGAATAAACTGTCACCATAAAATGTCCTTAC  
>HPV95\_Gamma\_40804520\_nt6094\_L1\_Tile\_rc|1  
AAAAAGTGTCCTTGCATAAAGCTGTTCCCTTCGGCCAAAGAAGAATAAACTGTCACCATAA  
>HPV95\_Gamma\_40804520\_nt6099\_L1\_Tile\_rc|1  
TAACAAAAAAGTGTCCTTGCATAAAGCTGTTCCCTTCGGCCAAAGAAGAATAAACTGTCAC  
>HPV95\_Gamma\_40804520\_nt6104\_L1\_Tile\_rc|1  
AGCTCTAACAAAAAAGTGTCCTTGCATAAAGCTGTTCCCTTCGGCCAAAGAAGAATAAACT  
>HPV95\_Gamma\_40804520\_nt6109\_L1\_Tile\_rc|1  
GTCCCAGCTCTAACAAAAAAGTGTCCTTGCATAAAGCTGTTCCCTTCGGCCAAAGAAGAAT  
>HPV95\_Gamma\_40804520\_nt6149\_L1\_Tile\_rc|1  
AGACTTCACTTCAAAAGGCTCTGGTAACGCATCACCCATTGTCCCAGCTCTAACAAAAAA  
>HPV95\_Gamma\_40804520\_nt6154\_L1\_Tile\_rc|1  
TAATCAGACTTCACTTCAAAAGGCTCTGGTAACGCATCACCCATTGTCCCAGCTCTAACAA  
>HPV95\_Gamma\_40804520\_nt6159\_L1\_Tile\_rc|1  
TTATGTAATCAGACTTCACTTCAAAAGGCTCTGGTAACGCATCACCCATTGTCCCAGCTC  
>HPV95\_Gamma\_40804520\_nt6164\_L1\_Tile\_rc|1  
AGCAATTATGTAATCAGACTTCACTTCAAAAGGCTCTGGTAACGCATCACCCATTGTCCC  
>HPV95\_Gamma\_40804520\_nt6179\_L1\_Tile\_rc|1  
TTGGTTACTCTGAGCAGCAATTATGTAATCAGACTTCACTTCAAAAGGCTCTGGTAACGC  
>HPV95\_Gamma\_40804520\_nt6189\_L1\_Tile\_rc|1  
TATTTTGTCTTGGTTACTCTGAGCAGCAATTATGTAATCAGACTTCACTTCAAAAGGCT  
>HPV95\_Gamma\_40804520\_nt6194\_L1\_Tile\_rc|1  
AAGATTATTTTGTCTTGGTTACTCTGAGCAGCAATTATGTAATCAGACTTCACTTCAAA  
>HPV95\_Gamma\_40804520\_nt6199\_L1\_Tile\_rc|1  
GGGCCAAGATTATTTTGTCTTGGTTACTCTGAGCAGCAATTATGTAATCAGACTTCACT  
>HPV95\_Gamma\_40804520\_nt6209\_L1\_Tile\_rc|1  
ATAAATGTGAGGGCCAAGATTATTTTGTCTTGGTTACTCTGAGCAGCAATTATGTAATC  
>HPV95\_Gamma\_40804520\_nt6214\_L1\_Tile\_rc|1  
CCAAAATAAATGTGAGGGCCAAGATTATTTTGTCTTGGTTACTCTGAGCAGCAATTATG  
>HPV95\_Gamma\_40804520\_nt6219\_L1\_Tile\_rc|1  
GAGTTCCAAAATAAATGTGAGGGCCAAGATTATTTTGTCTTGGTTACTCTGAGCAGCAA  
>HPV95\_Gamma\_40804520\_nt6224\_L1\_Tile\_rc|1  
GCTAGGAGTTCCAAAATAAATGTGAGGGCCAAGATTATTTTGTCTTGGTTACTCTGAGC  
>HPV95\_Gamma\_40804520\_nt6229\_L1\_Tile\_rc|1  
GAACCGCTAGGAGTTCCAAAATAAATGTGAGGGCCAAGATTATTTTGTCTTGGTTACTC  
>HPV95\_Gamma\_40804520\_nt6234\_L1\_Tile\_rc|1  
CAAGAGAACCGCTAGGAGTTCCAAAATAAATGTGAGGGCCAAGATTATTTTGTCTTGGT  
>HPV95\_Gamma\_40804520\_nt6239\_L1\_Tile\_rc|1  
TGATACAAGAGAACCGCTAGGAGTTCCAAAATAAATGTGAGGGCCAAGATTATTTTGTTC  
>HPV95\_Gamma\_40804520\_nt6244\_L1\_Tile\_rc|1  
TCACTTGATACAAGAGAACCGCTAGGAGTTCCAAAATAAATGTGAGGGCCAAGATTATTT  
>HPV95\_Gamma\_40804520\_nt6249\_L1\_Tile\_rc|1  
GAGATTCACTTGATACAAGAGAACCGCTAGGAGTTCCAAAATAAATGTGAGGGCCAAGAT  
>HPV95\_Gamma\_40804520\_nt6259\_L1\_Tile\_rc|1  
TTAAAAAGCTGAGATTCACTTGATACAAGAGAACCGCTAGGAGTTCCAAAATAAATGTGA  
>HPV95\_Gamma\_40804520\_nt6264\_L1\_Tile\_rc|1  
GTCGGTTAAAAAGCTGAGATTCACTTGATACAAGAGAACCGCTAGGAGTTCCAAAATAAA

>HPV95\_Gamma\_40804520\_nt6269\_L1\_Tile\_rc|1  
ATACGGTCGGTTAAAAAGCTGAGATTCACCTTGATACAAGAGAACCGCTAGGAGTTCCAAA  
>HPV95\_Gamma\_40804520\_nt6274\_L1\_Tile\_rc|1  
AACCAATACGGTCGGTTAAAAAGCTGAGATTCACCTTGATACAAGAGAACCGCTAGGAGTT  
>HPV95\_Gamma\_40804520\_nt6364\_L1\_Tile\_rc|1  
GTAAAGTTAGTGTATATGGGTATTATCAACCAGAGTTACAAAAAGCTGATTATCCCAACAA  
>HPV95\_Gamma\_40804520\_nt6369\_L1\_Tile\_rc|1  
AAATAGTAAAGTTAGTGTATATGGGTATTATCAACCAGAGTTACAAAAAGCTGATTATCCC  
>HPV95\_Gamma\_40804520\_nt6374\_L1\_Tile\_rc|1  
TACAGAAATAGTAAAGTTAGTGTATATGGGTATTATCAACCAGAGTTACAAAAAGCTGATT  
>HPV95\_Gamma\_40804520\_nt6384\_L1\_Tile\_rc|1  
CTTCATGCTTTACAGAAATAGTAAAGTTAGTGTATATGGGTATTATCAACCAGAGTTACAA  
>HPV95\_Gamma\_40804520\_nt6389\_L1\_Tile\_rc|1  
CTCTCCTTCATGCTTTACAGAAATAGTAAAGTTAGTGTATATGGGTATTATCAACCAGAGT  
>HPV95\_Gamma\_40804520\_nt6394\_L1\_Tile\_rc|1  
TTATCCTCTCCTTCATGCTTTACAGAAATAGTAAAGTTAGTGTATATGGGTATTATCAACC  
>HPV95\_Gamma\_40804520\_nt6399\_L1\_Tile\_rc|1  
AATTGTTATCCTCTCCTTCATGCTTTACAGAAATAGTAAAGTTAGTGTATATGGGTATTAT  
>HPV95\_Gamma\_40804520\_nt6404\_L1\_Tile\_rc|1  
TGTATAATTGTTATCCTCTCCTTCATGCTTTACAGAAATAGTAAAGTTAGTGTATATGGGT  
>HPV95\_Gamma\_40804520\_nt6409\_L1\_Tile\_rc|1  
TTATATGTATAATTGTTATCCTCTCCTTCATGCTTTACAGAAATAGTAAAGTTAGTGTTA  
>HPV95\_Gamma\_40804520\_nt6414\_L1\_Tile\_rc|1  
TTGCTTTATATGTATAATTGTTATCCTCTCCTTCATGCTTTACAGAAATAGTAAAGTTAG  
>HPV95\_Gamma\_40804520\_nt6419\_L1\_Tile\_rc|1  
ATCATTTGCTTTATATGTATAATTGTTATCCTCTCCTTCATGCTTTACAGAAATAGTAAA  
>HPV95\_Gamma\_40804520\_nt6424\_L1\_Tile\_rc|1  
TTAAAATCATTTGCTTTATATGTATAATTGTTATCCTCTCCTTCATGCTTTACAGAAATA  
>HPV95\_Gamma\_40804520\_nt6429\_L1\_Tile\_rc|1  
ACTGTTTAAAATCATTTGCTTTATATGTATAATTGTTATCCTCTCCTTCATGCTTTACAG  
>HPV95\_Gamma\_40804520\_nt6434\_L1\_Tile\_rc|1  
TAAATACTGTTTAAAATCATTTGCTTTATATGTATAATTGTTATCCTCTCCTTCATGCTT  
>HPV95\_Gamma\_40804520\_nt6539\_L1\_Tile\_rc|1  
TAATATATTTGGGTTTCATGACATTCAAATGAGCCATTACATCTGCTGTAAGAGGCACTCT  
>HPV95\_Gamma\_40804520\_nt6544\_L1\_Tile\_rc|1  
TTATCTAATATATTTGGGTTTCATGACATTCAAATGAGCCATTACATCTGCTGTAAGAGGC  
>HPV95\_Gamma\_40804520\_nt6624\_L1\_Tile\_rc|1  
AACGAGTAGCTCTGGATGTAATGAATCTGTATTGATCCTCAATACCAGAAGGTGGTGGGG  
>HPV95\_Gamma\_40804520\_nt6644\_L1\_Tile\_rc|1  
TGGTGGATTTTGAGTTGGACAACGAGTAGCTCTGGATGTAATGAATCTGTATTGATCCTC  
>HPV95\_Gamma\_40804520\_nt6649\_L1\_Tile\_rc|1  
TCTGCTGGTGGATTTTGAGTTGGACAACGAGTAGCTCTGGATGTAATGAATCTGTATTGA  
>HPV95\_Gamma\_40804520\_nt6654\_L1\_Tile\_rc|1  
CTCTTTCTGCTGGTGGATTTTGAGTTGGACAACGAGTAGCTCTGGATGTAATGAATCTGT  
>HPV95\_Gamma\_40804520\_nt6659\_L1\_Tile\_rc|1  
GTCTTCTCTTCTGCTGGTGGATTTTGAGTTGGACAACGAGTAGCTCTGGATGTAATGAA  
>HPV95\_Gamma\_40804520\_nt6679\_L1\_Tile\_rc|1  
AAGGACAAATCTTTAAAAGGGTCTTCTCTTCTGCTGGTGGATTTTGAGTTGGACAACGA  
>HPV95\_Gamma\_40804520\_nt6694\_L1\_Tile\_rc|1  
AGATCAACTGTCCAAAAGGACAAATCTTTAAAAGGGTCTTCTCTTCTGCTGGTGGATTT  
>HPV95\_Gamma\_40804520\_nt6699\_L1\_Tile\_rc|1  
CAGAAAGATCAACTGTCCAAAAGGACAAATCTTTAAAAGGGTCTTCTCTTCTGCTGGTG  
>HPV95\_Gamma\_40804520\_nt6704\_L1\_Tile\_rc|1  
ACGCTCAGAAAGATCAACTGTCCAAAAGGACAAATCTTTAAAAGGGTCTTCTCTTCTGCT  
>HPV95\_Gamma\_40804520\_nt6709\_L1\_Tile\_rc|1

GAAAAACGCTCAGAAAGATCAACTGTCCAAAAGGACAAATCTTTAAAAGGGTCTTCTCTT  
>HPV95\_Gamma\_40804520\_nt6714\_L1\_Tile\_rc|1  
CTGAAGAAAAACGCTCAGAAAGATCAACTGTCCAAAAGGACAAATCTTTAAAAGGGTCTT  
>HPV95\_Gamma\_40804520\_nt6724\_L1\_Tile\_rc|1  
TGGCTTAATTCTGAAGAAAAACGCTCAGAAAGATCAACTGTCCAAAAGGACAAATCTTTA  
>HPV95\_Gamma\_40804520\_nt6734\_L1\_Tile\_rc|1  
TAATGAAAATTGGCTTAATTCTGAAGAAAAACGCTCAGAAAGATCAACTGTCCAAAAGGA  
>HPV95\_Gamma\_40804520\_nt6739\_L1\_Tile\_rc|1  
CTTCCTAATGAAAATTGGCTTAATTCTGAAGAAAAACGCTCAGAAAGATCAACTGTCCAA  
>HPV95\_Gamma\_40804520\_nt6749\_L1\_Tile\_rc|1  
GAGAAACCGCCTTCCTAATGAAAATTGGCTTAATTCTGAAGAAAAACGCTCAGAAAGATC  
>HPV95\_Gamma\_40804520\_nt6784\_L1\_Tile\_rc|1  
CTTTTACGAGATCCATTTATTAATCCACTCTGATAGAGAAACCGCCTTCCTAATGAAAAT  
>HPV95\_Gamma\_40804520\_nt6789\_L1\_Tile\_rc|1  
TTTGTCTTTTACGAGATCCATTTATTAATCCACTCTGATAGAGAAACCGCCTTCCTAATG  
>HPV95\_Gamma\_40804520\_nt6794\_L1\_Tile\_rc|1  
AGCTCTTTGTCTTTTACGAGATCCATTTATTAATCCACTCTGATAGAGAAACCGCCTTCC  
>HPV95\_Gamma\_40804520\_nt6799\_L1\_Tile\_rc|1  
GTAATAGCTCTTTGTCTTTTACGAGATCCATTTATTAATCCACTCTGATAGAGAAACCGC  
>HPV95\_Gamma\_40804520\_nt6804\_L1\_Tile\_rc|1  
GAGAAGTAATAGCTCTTTGTCTTTTACGAGATCCATTTATTAATCCACTCTGATAGAGAA  
>HPV95\_Gamma\_40804520\_nt6809\_L1\_Tile\_rc|1  
AGTTTGAGAAGTAATAGCTCTTTGTCTTTTACGAGATCCATTTATTAATCCACTCTGATA  
>HPV95\_Gamma\_40804520\_nt6819\_L1\_Tile\_rc|1  
TGCCTGTTGCAGTTTGAGAAGTAATAGCTCTTTGTCTTTTACGAGATCCATTTATTAATC  
>HPV95\_Gamma\_40804520\_nt6829\_L1\_Tile\_rc|1  
GAACGTTTTGTGCCTGTTGCAGTTTGAGAAGTAATAGCTCTTTGTCTTTTACGAGATCCA  
>HPV96\_Beta\_50253426\_nt5987\_L1\_Tile\_rc|1  
ACACTTCATGATCTCCATTATTTTTCTCACATCAAATAAGGATGTCTTACTGTTAACA  
>HPV96\_Beta\_50253426\_nt5992\_L1\_Tile\_rc|1  
AACTAACACTTCATGATCTCCATTATTTTTCTCACATCAAATAAGGATGTCTTACTGT  
>HPV96\_Beta\_50253426\_nt5997\_L1\_Tile\_rc|1  
TTGGGAACATAACACTTCATGATCTCCATTATTTTTCTCACATCAAATAAGGATGTCTCT  
>HPV96\_Beta\_50253426\_nt6002\_L1\_Tile\_rc|2  
ACACCTTGGAACATAACACTTCATGATCTCCATTATTTTTCTCACATCAAATAAGGAT  
>HPV96\_Beta\_50253426\_nt6222\_L1\_Tile\_rc|2  
CCACCTGTATTATAGCCATTTGGATTTTCCGTGTCTTTCACCTTGTTAAATAATGGATGT  
>HPV96\_Beta\_50253426\_nt6252\_L1\_Tile\_rc|1  
TCAAAGGATGTATTCACCCTATCATCTTTCCACCTGTATTATAGCCATTTGGATTTTCC  
>HPV96\_Beta\_50253426\_nt6257\_L1\_Tile\_rc|1  
TGGGATCAAAGGATGTATTCACCCTATCATCTTTCCACCTGTATTATAGCCATTTGGAT  
>HPV96\_Beta\_50253426\_nt6367\_L1\_Tile\_rc|1  
TAGAGGTGGACACGCTCCCTGATCAGGAGGATTTTCTACACAAGGTAAGGCCTTGTCCCA  
>HPV96\_Beta\_50253426\_nt6377\_L1\_Tile\_rc|1  
TTTTTAATTCTAGAGGTGGACACGCTCCCTGATCAGGAGGATTTTCTACACAAGGTAAGG  
>HPV96\_Beta\_50253426\_nt6382\_L1\_Tile\_rc|2  
AGTATTTTTTAATTCTAGAGGTGGACACGCTCCCTGATCAGGAGGATTTTCTACACAAGG  
>HPV96\_Beta\_50253426\_nt6387\_L1\_Tile\_rc|1  
ATAATAGTATTTTTTAATTCTAGAGGTGGACACGCTCCCTGATCAGGAGGATTTTCTACA  
>HPV96\_Beta\_50253426\_nt6487\_L1\_Tile\_rc|1  
AATTTTCATTAACAATATCCAGACTAACATCAGACTTAGTGACTGATAATGTTTTAAATTT  
>HPV96\_Beta\_50253426\_nt6632\_L1\_Tile\_rc|1  
CAACTGCATCATCTGGAATACTGTCTCTACTGACCCACCTCTACAAAACATATGTCTGG  
>HPV96\_Beta\_50253426\_nt6637\_L1\_Tile\_rc|1  
TTCTCCAACATGCATCATCTGGAATACTGTCTCTACTGACCCACCTCTACAAAACATATG

>HPV96\_Beta\_50253426\_nt6647\_L1\_Tile\_rc|1  
AATGGTTGTCTTCTCCAACCTGCATCATCTGGAATACTGTCTCTCTACTGACCCACCTCTAC  
>HPV96\_Beta\_50253426\_nt6662\_L1\_Tile\_rc|2  
CAGCCTTTAAATAATAATGGTTGTCTTCTCCAACCTGCATCATCTGGAATACTGTCTCTTA  
>HPV96\_Beta\_50253426\_nt6667\_L1\_Tile\_rc|1  
ACTGGCAGCCTTTAAATAATAATGGTTGTCTTCTCCAACCTGCATCATCTGGAATACTGTC  
>HPV96\_Beta\_50253426\_nt6672\_L1\_Tile\_rc|1  
TGATCACTGGCAGCCTTTAAATAATAATGGTTGTCTTCTCCAACCTGCATCATCTGGAATA  
>HPV96\_Beta\_50253426\_nt6682\_L1\_Tile\_rc|2  
ATCTCTGTTTTGATCACTGGCAGCCTTTAAATAATAATGGTTGTCTTCTCCAACCTGCATC  
>HPV96\_Beta\_50253426\_nt6687\_L1\_Tile\_rc|1  
ATTGTATCTCTGTTTTGATCACTGGCAGCCTTTAAATAATAATGGTTGTCTTCTCCAACCT  
>HPV96\_Beta\_50253426\_nt6692\_L1\_Tile\_rc|1  
TTGCCATTGTATCTCTGTTTTGATCACTGGCAGCCTTTAAATAATAATGGTTGTCTTCTC  
>HPV96\_Beta\_50253426\_nt6697\_L1\_Tile\_rc|1  
GGAACCTTGCCATTGTATCTCTGTTTTGATCACTGGCAGCCTTTAAATAATAATGGTTGTC  
>HPV96\_Beta\_50253426\_nt6702\_L1\_Tile\_rc|2  
TAAATGGAACCTTGCCATTGTATCTCTGTTTTGATCACTGGCAGCCTTTAAATAATAATGG  
>HPV96\_Beta\_50253426\_nt6707\_L1\_Tile\_rc|1  
GAGTGTAATGGAACCTTGCCATTGTATCTCTGTTTTGATCACTGGCAGCCTTTAAATAAT  
>HPV96\_Beta\_50253426\_nt6727\_L1\_Tile\_rc|1  
TAAAGATCCACTGACTGTGGGAGTGTAATGGAACCTTGCCATTGTATCTCTGTTTTGATC  
>HPV96\_Beta\_50253426\_nt6732\_L1\_Tile\_rc|1  
GAAACTAAAGATCCACTGACTGTGGGAGTGTAATGGAACCTTGCCATTGTATCTCTGTTT  
>HPV96\_Beta\_50253426\_nt6737\_L1\_Tile\_rc|1  
CTGTAGAAACTAAAGATCCACTGACTGTGGGAGTGTAATGGAACCTTGCCATTGTATCTC  
>HPV96\_Beta\_50253426\_nt6742\_L1\_Tile\_rc|2  
TGCATCTGTAGAAACTAAAGATCCACTGACTGTGGGAGTGTAATGGAACCTTGCCATTGT  
>HPV96\_Beta\_50253426\_nt6747\_L1\_Tile\_rc|1  
ATCTGTGCATCTGTAGAAACTAAAGATCCACTGACTGTGGGAGTGTAATGGAACCTTGCC  
>HPV96\_Beta\_50253426\_nt6757\_L1\_Tile\_rc|1  
CCTATTGAAAATCTGTGCATCTGTAGAAACTAAAGATCCACTGACTGTGGGAGTGTAAT  
>HPV96\_Beta\_50253426\_nt6777\_L1\_Tile\_rc|1  
GCCCTTTGCAGCCAAAAGGCCTATTGAAAATCTGTGCATCTGTAGAAACTAAAGATCCA  
>HPV96\_Beta\_50253426\_nt6782\_L1\_Tile\_rc|2  
CTTGAGCCCTTTGCAGCCAAAAGGCCTATTGAAAATCTGTGCATCTGTAGAAACTAAAG  
>HPV96\_Beta\_50253426\_nt6862\_L1\_Tile\_rc|2  
GATACAGAAATTAGTATTCTGGTATTATCTATTACTGTGAGAAAGATTTGATTACCCCA  
>HPV96\_Beta\_50253426\_nt6867\_L1\_Tile\_rc|1  
ACACTGATACAGAAATTAGTATTCTGGTATTATCTATTACTGTGAGAAAGATTTGATTA  
>HPV96\_Beta\_50253426\_nt6877\_L1\_Tile\_rc|1  
ATTTGAGGAGACACTGATACAGAAATTAGTATTCTGGTATTATCTATTACTGTGAGAAA  
>HPV96\_Beta\_50253426\_nt6882\_L1\_Tile\_rc|2  
TGATCATTTGAGGAGACACTGATACAGAAATTAGTATTCTGGTATTATCTATTACTGTG  
>HPV96\_Beta\_50253426\_nt6887\_L1\_Tile\_rc|1  
ATGCCTGATCATTTGAGGAGACACTGATACAGAAATTAGTATTCTGGTATTATCTATTA  
>HPV96\_Beta\_50253426\_nt6892\_L1\_Tile\_rc|1  
CTGTAATGCCTGATCATTTGAGGAGACACTGATACAGAAATTAGTATTCTGGTATTATC  
>HPV96\_Beta\_50253426\_nt6897\_L1\_Tile\_rc|1  
TATTCTGTAATGCCTGATCATTTGAGGAGACACTGATACAGAAATTAGTATTCTGGTA  
>HPV96\_Beta\_50253426\_nt6902\_L1\_Tile\_rc|2  
TATTGTATTCTGTAATGCCTGATCATTTGAGGAGACACTGATACAGAAATTAGTATTCC  
>HPV96\_Beta\_50253426\_nt6907\_L1\_Tile\_rc|1  
TGCAGTATTGTATTCTGTAATGCCTGATCATTTGAGGAGACACTGATACAGAAATTAGT  
>HPV96\_Beta\_50253426\_nt6912\_L1\_Tile\_rc|1

AAGTTTGCAGTATTGTATTCCTGTAATGCCTGATCATTTGAGGAGACACTGATACAGAAA  
>HPV96\_Beta\_50253426\_nt6917\_L1\_Tile\_rc|1  
CTCTAAAGTTTGCAGTATTGTATTCCTGTAATGCCTGATCATTTGAGGAGACACTGATAC  
>HPV96\_Beta\_50253426\_nt6922\_L1\_Tile\_rc|2  
ATATTCTCTAAAGTTTGCAGTATTGTATTCCTGTAATGCCTGATCATTTGAGGAGACACT  
>HPV96\_Beta\_50253426\_nt6927\_L1\_Tile\_rc|1  
CTCAAATATTCTCTAAAGTTTGCAGTATTGTATTCCTGTAATGCCTGATCATTTGAGGAG  
>HPV96\_Beta\_50253426\_nt6932\_L1\_Tile\_rc|1  
CATGTCTCAAAATATTCTCTAAAGTTTGCAGTATTGTATTCCTGTAATGCCTGATCATTTG  
>HPV96\_Beta\_50253426\_nt6987\_L1\_Tile\_rc|1  
GGCTCTAATGGAACCTTTACATAATTGTAATATAAAGGATAATTCATACTCTTCTACATGT  
>HPV96\_Beta\_50253426\_nt6992\_L1\_Tile\_rc|1  
CTTCTGGCTCTAATGGAACCTTTACATAATTGTAATATAAAGGATAATTCATACTCTTCTA  
>HPV96\_Beta\_50253426\_nt6997\_L1\_Tile\_rc|1  
TAATACTTCTGGCTCTAATGGAACCTTTACATAATTGTAATATAAAGGATAATTCATACTC  
>HPV96\_Beta\_50253426\_nt7122\_L1\_Tile\_rc|2  
TCTGGACACCGTGTGGCTGCTGAATGTATGTATCTATATGTATCATTTGATGGGATTGTCA  
>HPV96\_Beta\_50253426\_nt7127\_L1\_Tile\_rc|1  
TTTTATCTGGACACCGTGTGGCTGCTGAATGTATGTATCTATATGTATCATTTGATGGGAT  
>HPV96\_Beta\_50253426\_nt7132\_L1\_Tile\_rc|1  
TGTAGTTTTATCTGGACACCGTGTGGCTGCTGAATGTATGTATCTATATGTATCATTTGAT  
>HPV96\_Beta\_50253426\_nt7182\_L1\_Tile\_rc|2  
TCAACATCCCAAAAGTGATAACCTGCAAAGGGATCTGCTTTTTCTTTAGGTGTAGTTTTA  
>HPV96\_Beta\_50253426\_nt7187\_L1\_Tile\_rc|1  
ACAAATCAACATCCCAAAAGTGATAACCTGCAAAGGGATCTGCTTTTTCTTTAGGTGTAG  
>HPV96\_Beta\_50253426\_nt7197\_L1\_Tile\_rc|1  
AACTTTTCAGACAAATCAACATCCCAAAAGTGATAACCTGCAAAGGGATCTGCTTTTTCT  
>HPV96\_Beta\_50253426\_nt7272\_L1\_Tile\_rc|1  
TTAACTCTTTTGTTTTGCAGGTTGGCTTGAAATAAGAATTTACGTCCCAGAGAATACTGA  
>HPV96\_Beta\_50253426\_nt7292\_L1\_Tile\_rc|1  
CGGTTACAGTAACCCCTCTGTAACTCTTTTGTTTTGCAGGTTGGCTTGAAATAAGAATT  
>HPV96\_Beta\_50253426\_nt7297\_L1\_Tile\_rc|1  
CCTCCCGGTTACAGTAACCCCTCTGTAACTCTTTTGTTTTGCAGGTTGGCTTGAAATAA  
>HPV96\_Beta\_50253426\_nt7302\_L1\_Tile\_rc|2  
GTAGCCCTCCCGGTTACAGTAACCCCTCTGTAACTCTTTTGTTTTGCAGGTTGGCTTGA  
>HPV96\_Beta\_50253426\_nt7317\_L1\_Tile\_rc|1  
GTACCTCTTGAGGTTGTAGCCCTCCCGGTTACAGTAACCCCTCTGTAACTCTTTTGT  
>HPV96\_Beta\_50253426\_nt7322\_L1\_Tile\_rc|2  
GTTTTGTACCTCTTGAGGTTGTAGCCCTCCCGGTTACAGTAACCCCTCTGTAACTCTTT  
>HPV96\_Beta\_50253426\_nt7336\_L1\_Tile\_rc|1  
TCAGCGTCGTTTTCGTTTTGTACCTCTTGAGGTTGTAGCCCTCCCGGTTACAGTAACCCC  
>HPV97\_Alpha\_71726694\_nt5612\_L1\_Tile\_rc|1  
CCTACTACCTGCACCTTTAGAACTTTAAAATAAGGATTGCCTACAGCTAATAATCTAGA  
>HPV97\_Alpha\_71726694\_nt5617\_L1\_Tile\_rc|1  
TCTTGCTACTACCTGCACCTTTAGAACTTTAAAATAAGGATTGCCTACAGCTAATAAT  
>HPV97\_Alpha\_71726694\_nt5622\_L1\_Tile\_rc|2  
GAACATCTTGCTACTACCTGCACCTTTAGAACTTTAAAATAAGGATTGCCTACAGCTA  
>HPV97\_Alpha\_71726694\_nt5642\_L1\_Tile\_rc|2  
TTGGTAGGCAGATACTTTGGGAACATCTTGCTACTACCTGCACCTTTAGAACTTTAAA  
>HPV97\_Alpha\_71726694\_nt5647\_L1\_Tile\_rc|1  
CTATATTGGTAGGCAGATACTTTGGGAACATCTTGCTACTACCTGCACCTTTAGAACT  
>HPV97\_Alpha\_71726694\_nt5657\_L1\_Tile\_rc|1  
CCTAAACACTCTATATTGGTAGGCAGATACTTTGGGAACATCTTGCTACTACCTGCACC  
>HPV97\_Alpha\_71726694\_nt5662\_L1\_Tile\_rc|2  
GTTACCCATAACACTCTATATTGGTAGGCAGATACTTTGGGAACATCTTGCTACTACCT



>HPV97\_Alpha\_71726694\_nt5667\_L1\_Tile\_rc|1  
GCAAAGTTACCCTAAACACTCTATATTGGTAGGCAGATACTTTGGGAACATCTTGCCTAC  
>HPV97\_Alpha\_71726694\_nt5857\_L1\_Tile\_rc|1  
TGTGTAACAACAGCTGTAGCAGCATGTGAACCTTTCAGTGTCTAATTTGTTATATAAA  
>HPV97\_Alpha\_71726694\_nt5982\_L1\_Tile\_rc|2  
CTTGCTGTATGTGAGTAGATTTACATGGTGTACCTTTAGCCCAATGTTCCACCAATAGCAG  
>HPV97\_Alpha\_71726694\_nt6017\_L1\_Tile\_rc|1  
CACTGTATTTTTTAAGCTCTAAAGGAGGACAGTCACCTTGCTGTATGTGAGTAGATTTACA  
>HPV97\_Alpha\_71726694\_nt6287\_L1\_Tile\_rc|1  
TTCACGCATACCAGTTCCTTTAATATATAAATCCTGTGGAATAGTGTCACCCATTGTTCC  
>HPV97\_Alpha\_71726694\_nt6302\_L1\_Tile\_rc|2  
AAAACTGCCAGGAGTTTCACGCATACCAGTTCCTTTAATATATAAATCCTGTGGAATAGT  
>HPV97\_Alpha\_71726694\_nt6517\_L1\_Tile\_rc|1  
TATTTTGTAGGGTCATATGTGGTAGCTACGCCATTTTGTGTAGAAGCACACAGTGTTAAA  
>HPV97\_Alpha\_71726694\_nt6522\_L1\_Tile\_rc|2  
GTTTATATTTTGTAGGGTCATATGTGGTAGCTACGCCATTTTGTGTAGAAGCACACAGTG  
>HPV97\_Alpha\_71726694\_nt6712\_L1\_Tile\_rc|1  
GCAACAGACTGTACAAAGCGATATGTATCTACTAACTGGTAGTGGGTGGCGGTGGGACA  
>HPV97\_Alpha\_71726694\_nt6717\_L1\_Tile\_rc|1  
TTATAGCAACAGACTGTACAAAGCGATATGTATCTACTAACTGGTAGTGGGTGGCGGTG  
>HPV97\_Alpha\_71726694\_nt6952\_L1\_Tile\_rc|1  
TTACGACGGACACGTAAACGCTTAGCAGGTTTGGGAAGTAGAGGGGCAGACGGGGCAGAA  
>HPVFA75/KI88-03\_Unclassified\_206902429\_nt5666\_L1\_Tile\_rc|1  
AAATATGTTAGTTCCTTTCTACATATTCATCAGTGCCTTAACACCTTAGCTACTGGAGTTGA  
>HPVFA75/KI88-03\_Unclassified\_206902429\_nt6136\_L1\_Tile\_rc|1  
TTTTTTCAGTTCATAGGTGGACATTTTCCCTGTTGATCTCCTGCATTTTCACATGGCTCA  
>HPVFA75/KI88-03\_Unclassified\_206902429\_nt6141\_L1\_Tile\_rc|1  
CAGAATTTTTCAGTTCATAGGTGGACATTTTCCCTGTTGATCTCCTGCATTTTCACATG  
>HPVFA75/KI88-03\_Unclassified\_206902429\_nt6166\_L1\_Tile\_rc|1  
TCCATCATATCGCCATCTTGAATCACAGAATTTTTCAGTTCATAGGTGGACATTTTCCC  
>HPVFA75/KI88-03\_Unclassified\_206902429\_nt6186\_L1\_Tile\_rc|1  
TTATATTTCCAAATCCAATGTCCATCATATCGCCATCTTGAATCACAGAATTTTTCAGTT  
>HPVFA75/KI88-03\_Unclassified\_206902429\_nt6236\_L1\_Tile\_rc|1  
TACTAAATCTAAGCTAACATCTGATCTATTTCAGGGATAGAGTTTTAAATTTATATTTCC  
>HPVFA75/KI88-03\_Unclassified\_206902429\_nt6241\_L1\_Tile\_rc|1  
TCGTCTACTAAATCTAAGCTAACATCTGATCTATTTCAGGGATAGAGTTTTAAATTTATA  
>HPVFA75/KI88-03\_Unclassified\_206902429\_nt6246\_L1\_Tile\_rc|1  
CAATTTTCGTCTACTAAATCTAAGCTAACATCTGATCTATTTCAGGGATAGAGTTTTAAAT  
>HPVFA75/KI88-03\_Unclassified\_206902429\_nt6251\_L1\_Tile\_rc|1  
TTTAGCAATTTCTGTCTACTAAATCTAAGCTAACATCTGATCTATTTCAGGGATAGAGTTTT  
>HPVFA75/KI88-03\_Unclassified\_206902429\_nt6391\_L1\_Tile\_rc|1  
TTATTTGCTCCATCTGGAGTAGCGTCTCCAACATTACCTCCTCTGGTAAAATAATGTCTT  
>HPVFA75/KI88-03\_Unclassified\_206902429\_nt6396\_L1\_Tile\_rc|1  
CTTGATTATTTGCTCCATCTGGAGTAGCGTCTCCAACATTACCTCCTCTGGTAAAATAAT  
>HPVFA75/KI88-03\_Unclassified\_206902429\_nt6401\_L1\_Tile\_rc|1  
ATGATCTTGATTATTTGCTCCATCTGGAGTAGCGTCTCCAACATTACCTCCTCTGGTAAA  
>HPVFA75/KI88-03\_Unclassified\_206902429\_nt6406\_L1\_Tile\_rc|1  
AATTTATGATCTTGATTATTTGCTCCATCTGGAGTAGCGTCTCCAACATTACCTCCTCTG  
>HPVFA75/KI88-03\_Unclassified\_206902429\_nt6416\_L1\_Tile\_rc|1  
AGGTAAATAAAATTTATGATCTTGATTATTTGCTCCATCTGGAGTAGCGTCTCCAACATT  
>HPVFA75/KI88-03\_Unclassified\_206902429\_nt6421\_L1\_Tile\_rc|1  
TTAGGAGGTAAATAAAATTTATGATCTTGATTATTTGCTCCATCTGGAGTAGCGTCTCCA  
>HPVFA75/KI88-03\_Unclassified\_206902429\_nt6426\_L1\_Tile\_rc|1  
ATGACTTAGGAGGTAAATAAAATTTATGATCTTGATTATTTGCTCCATCTGGAGTAGCGT  
>HPVFA75/KI88-03\_Unclassified\_206902429\_nt6436\_L1\_Tile\_rc|1

TGACTTTGTGATGACTTAGGAGGTAAATAAAAATTTATGATCTTGATTATTTGCTCCATCT  
>HPVFA75/KI88-03\_Unclassified\_206902429\_nt6441\_L1\_Tile\_rc|1  
GTGTTTGAAGTTTGTGATGACTTAGGAGGTAAATAAAAATTTATGATCTTGATTATTTGCTC  
>HPVFA75/KI88-03\_Unclassified\_206902429\_nt6446\_L1\_Tile\_rc|1  
TCCTAGTGTGTTGACTTTGTGATGACTTAGGAGGTAAATAAAAATTTATGATCTTGATTATT  
>HPVFA75/KI88-03\_Unclassified\_206902429\_nt6451\_L1\_Tile\_rc|1  
GAATTTCCCTAGTGTGTTGACTTTGTGATGACTTAGGAGGTAAATAAAAATTTATGATCTTGA  
>HPVFA75/KI88-03\_Unclassified\_206902429\_nt6456\_L1\_Tile\_rc|1  
AAATTGAATTTCCCTAGTGTGTTGACTTTGTGATGACTTAGGAGGTAAATAAAAATTTATGAT  
>HPVFA75/KI88-03\_Unclassified\_206902429\_nt6461\_L1\_Tile\_rc|1  
AAAGTAAATTGAATTTCCCTAGTGTGTTGACTTTGTGATGACTTAGGAGGTAAATAAAAATTT  
>HPVFA75/KI88-03\_Unclassified\_206902429\_nt6466\_L1\_Tile\_rc|1  
GTAGGAAAGTAAATTGAATTTCCCTAGTGTGTTGACTTTGTGATGACTTAGGAGGTAAATAA  
>HPVFA75/KI88-03\_Unclassified\_206902429\_nt6471\_L1\_Tile\_rc|1  
TAACAGTAGGAAAGTAAATTGAATTTCCCTAGTGTGTTGACTTTGTGATGACTTAGGAGGTA  
>HPVFA75/KI88-03\_Unclassified\_206902429\_nt6476\_L1\_Tile\_rc|1  
ACCACTAACAGTAGGAAAGTAAATTGAATTTCCCTAGTGTGTTGACTTTGTGATGACTTAGG  
>HPVFA75/KI88-03\_Unclassified\_206902429\_nt6481\_L1\_Tile\_rc|1  
AGAGAACCACTAACAGTAGGAAAGTAAATTGAATTTCCCTAGTGTGTTGACTTTGTGATGAC  
>HPVFA75/KI88-03\_Unclassified\_206902429\_nt6491\_L1\_Tile\_rc|1  
TGAAGAGACTAGAGAACCCTAACAGTAGGAAAGTAAATTGAATTTCCCTAGTGTGTTGACT  
>HPVFA75/KI88-03\_Unclassified\_206902429\_nt6641\_L1\_Tile\_rc|1  
AGCACCATTATCTGAAGGTACACAAATGGTAAAGTTAGTGTTTCTAGTGTTATCAGCAAC  
>HPVFA75/KI88-03\_Unclassified\_206902429\_nt6646\_L1\_Tile\_rc|1  
GTTATAGCACCATTATCTGAAGGTACACAAATGGTAAAGTTAGTGTTTCTAGTGTTATCA  
>HPVFA75/KI88-03\_Unclassified\_206902429\_nt6656\_L1\_Tile\_rc|1  
ATCATACTCAGTTATAGCACCATTATCTGAAGGTACACAAATGGTAAAGTTAGTGTTTCT  
>HPVFA75/KI88-03\_Unclassified\_206902429\_nt6661\_L1\_Tile\_rc|1  
CTAGAATCATACTCAGTTATAGCACCATTATCTGAAGGTACACAAATGGTAAAGTTAGTG  
>HPVFA75/KI88-03\_Unclassified\_206902429\_nt6666\_L1\_Tile\_rc|1  
ATTTGCTAGAAATCATACTCAGTTATAGCACCATTATCTGAAGGTACACAAATGGTAAAGT  
>HPVFA75/KI88-03\_Unclassified\_206902429\_nt6676\_L1\_Tile\_rc|1  
AATTCTCTAAATTTGCTAGAAATCATACTCAGTTATAGCACCATTATCTGAAGGTACACAA  
>HPVFA75/KI88-03\_Unclassified\_206902429\_nt6681\_L1\_Tile\_rc|1  
TTAAAAATTTCTCTAAATTTGCTAGAAATCATACTCAGTTATAGCACCATTATCTGAAGGTA  
>HPVFA75/KI88-03\_Unclassified\_206902429\_nt6691\_L1\_Tile\_rc|1  
TCCACGTGCCTTAAAAATTTCTCTAAATTTGCTAGAAATCATACTCAGTTATAGCACCATTA  
>HPVFA75/KI88-03\_Unclassified\_206902429\_nt6701\_L1\_Tile\_rc|1  
TTGATACTCTTCCACGTGCCTTAAAAATTTCTCTAAATTTGCTAGAAATCATACTCAGTTAT  
>HPVFA75/KI88-03\_Unclassified\_206902429\_nt6706\_L1\_Tile\_rc|1  
GATATTTGATACTCTTCCACGTGCCTTAAAAATTTCTCTAAATTTGCTAGAAATCATACTCA  
>HPVFA75/KI88-03\_Unclassified\_206902429\_nt6711\_L1\_Tile\_rc|1  
TTACAGATATTTGATACTCTTCCACGTGCCTTAAAAATTTCTCTAAATTTGCTAGAAATCAT  
>HPVFA75/KI88-03\_Unclassified\_206902429\_nt6766\_L1\_Tile\_rc|1  
GCATTGATCTGGGCTAGCACATCAGGTTGCAGTGATACTTTACACAGTTGTAATATTACA  
>HPVFA75/KI88-03\_Unclassified\_206902429\_nt6771\_L1\_Tile\_rc|1  
TCATTGCATTGATCTGGGCTAGCACATCAGGTTGCAGTGATACTTTACACAGTTGTAATA  
>HPVFA75/KI88-03\_Unclassified\_206902429\_nt6786\_L1\_Tile\_rc|1  
CTAATATACCTGAATTCATTGCATTGATCTGGGCTAGCACATCAGGTTGCAGTGATACTT  
>HPVFA75/KI88-03\_Unclassified\_206902429\_nt6861\_L1\_Tile\_rc|1  
CTGAGGAATTTATAAATCTATAGGTGTCATGTACTGCATTGTCAGGAGTTGGTACAAATC  
>HPVFA75/KI88-03\_Unclassified\_206902429\_nt6871\_L1\_Tile\_rc|1  
CATTTAGTGCTGAGGAATTTATAAATCTATAGGTGTCATGTACTGCATTGTCAGGAGTT  
>HPVFA75/KI88-03\_Unclassified\_206902429\_nt6891\_L1\_Tile\_rc|1  
TTGCAGGAACCTTATCTGGACATTTAGTGGCTGAGGAATTTATAAATCTATAGGTGTCAT

>HPVFA75/KI88-03\_Unclassified\_206902429\_nt6896\_L1\_Tile\_rc|1  
ATCTTTTGCAGGAACCTTATCTGGACATTTAGTGGCTGAGGAATTTATAAATCTATAGGT  
>HPVFA75/KI88-03\_Unclassified\_206902429\_nt6901\_L1\_Tile\_rc|1  
TCTCTATCTTTTGCAGGAACCTTATCTGGACATTTAGTGGCTGAGGAATTTATAAATCTA  
>HPVFA75/KI88-03\_Unclassified\_206902429\_nt6906\_L1\_Tile\_rc|1  
GATCCTCTCTATCTTTTGCAGGAACCTTATCTGGACATTTAGTGGCTGAGGAATTTATAA  
>HPVFA75/KI88-03\_Unclassified\_206902429\_nt6911\_L1\_Tile\_rc|1  
AAATGGATCCTCTCTATCTTTTGCAGGAACCTTATCTGGACATTTAGTGGCTGAGGAATT  
>HPVFA75/KI88-03\_Unclassified\_206902429\_nt6926\_L1\_Tile\_rc|1  
AAAGAAATATTGAGCAAATGGATCCTCTCTATCTTTTGCAGGAACCTTATCTGGACATTT  
>HPVFA75/KI88-03\_Unclassified\_206902429\_nt7021\_L1\_Tile\_rc|1  
CTGGTGTCTGTAAATCCTGCTTGGAACAAAAACTTTCTTCCTAAAGGATATTGATCTAAA  
>HPVFA75/KI88-03\_Unclassified\_206902429\_nt7026\_L1\_Tile\_rc|1  
TGACCCTGGTGTCTGTAAATCCTGCTTGGAACAAAAACTTTCTTCCTAAAGGATATTGAT  
>HPVFA75/KI88-03\_Unclassified\_206902429\_nt7031\_L1\_Tile\_rc|1  
TGATTTGACCCTGGTGTCTGTAAATCCTGCTTGGAACAAAAACTTTCTTCCTAAAGGATA  
>HPVFA75/KI88-03\_Unclassified\_206902429\_nt7036\_L1\_Tile\_rc|1  
TTTAATGATTTGACCCTGGTGTCTGTAAATCCTGCTTGGAACAAAAACTTTCTTCCTAAA  
>HPVFA75/KI88-03\_Unclassified\_206902429\_nt7041\_L1\_Tile\_rc|1  
TACGCTTTAATGATTTGACCCTGGTGTCTGTAAATCCTGCTTGGAACAAAAACTTTCTTC  
>HPVFA75/KI88-03\_Unclassified\_206902429\_nt7046\_L1\_Tile\_rc|1  
TCTGCTACGCTTTAATGATTTGACCCTGGTGTCTGTAAATCCTGCTTGGAACAAAAACTT  
>HPVFA75/KI88-03\_Unclassified\_206902429\_nt7051\_L1\_Tile\_rc|1  
ACAGATCTGCTACGCTTTAATGATTTGACCCTGGTGTCTGTAAATCCTGCTTGGAACAAA  
>HPVFA75/KI88-03\_Unclassified\_206902429\_nt7071\_L1\_Tile\_rc|1  
GTTTTGCAGTACCCCGAGAAACAGATCTGCTACGCTTTAATGATTTGACCCTGGTGTCT  
>HPVFA75/KI88-03\_Unclassified\_206902429\_nt7081\_L1\_Tile\_rc|1  
GTCCGTCGTCGTTTTGCAGTACCCCGAGAAACAGATCTGCTACGCTTTAATGATTTGACC  
>HPVRTRX7\_Unclassified\_30315616\_nt6412\_L1\_Tile\_rc|1  
TACCATTATCTGCAGGCGCATCTCCACAAGGTAAGGCCTTTTCCCAATGCTCTCCCACAC  
>HPVRTRX7\_Unclassified\_30315616\_nt6427\_L1\_Tile\_rc|1  
CAATTGGAGGGCAAATACCATTATCTGCAGGCGCATCTCCACAAGGTAAGGCCTTTTCCC  
>HPVRTRX7\_Unclassified\_30315616\_nt6447\_L1\_Tile\_rc|1  
AATAAAAGTGTTTTTTAATTCAATTGGAGGGCAAATACCATTATCTGCAGGCGCATCTCC  
>HPVRTRX7\_Unclassified\_30315616\_nt6532\_L1\_Tile\_rc|1  
TATCCAGACTGACATCAGCCCTATTCTGCTGTAAAGTTTTGAAATTCATATTGCCAAAAC  
>HPVRTRX7\_Unclassified\_30315616\_nt6537\_L1\_Tile\_rc|1  
AACTATATCCAGACTGACATCAGCCCTATTCTGCTGTAAAGTTTTGAAATTCATATTGCC  
>HPVRTRX7\_Unclassified\_30315616\_nt6542\_L1\_Tile\_rc|2  
TCATTAACTATATCCAGACTGACATCAGCCCTATTCTGCTGTAAAGTTTTGAAATTCATA  
>HPVRTRX7\_Unclassified\_30315616\_nt6547\_L1\_Tile\_rc|1  
AAGTTTCATTAACTATATCCAGACTGACATCAGCCCTATTCTGCTGTAAAGTTTTGAAAT  
>HPVRTRX7\_Unclassified\_30315616\_nt6987\_L1\_Tile\_rc|1  
CTTTTGTGAGTCATATGATTGTATTTGCTGTATATCTTGATTTTCACTAGATATAGATAT  
>HPVRTRX7\_Unclassified\_30315616\_nt6997\_L1\_Tile\_rc|1  
ATTCCCTAAACTTTTGTGAGTCATATGATTGTATTTGCTGTATATCTTGATTTTCACTAG  
>HPVRTRX7\_Unclassified\_30315616\_nt7002\_L1\_Tile\_rc|2  
TAAATATTCCCTAAACTTTTGTGAGTCATATGATTGTATTTGCTGTATATCTTGATTTTC  
>HPVRTRX7\_Unclassified\_30315616\_nt7007\_L1\_Tile\_rc|1  
TGCCTTAAATATTCCTAAACTTTTGTGAGTCATATGATTGTATTTGCTGTATATCTTGA  
>HPVRTRX7\_Unclassified\_30315616\_nt7012\_L1\_Tile\_rc|1  
CTACGTGCCTTAAATATTCCTAAACTTTTGTGAGTCATATGATTGTATTTGCTGTATAT  
>HPVRTRX7\_Unclassified\_30315616\_nt7107\_L1\_Tile\_rc|1  
TAGTAAGGAGGGGTTTCATTGCATTTATTTGTGCTAAAACCTTCTGCTTGTAGTGAATCTT  
>HPVRTRX7\_Unclassified\_30315616\_nt7182\_L1\_Tile\_rc|2

TAAGGAATCAATAAATCTGTATGTGTCTCTGGATAGGATTATCGGGAGTTGGCACAAATCC  
>HPVRTRX7\_Unclassified\_30315616\_nt7197\_L1\_Tile\_rc|1  
GGGACACCTGGTAGCTAAGGAATCAATAAATCTGTATGTGTCTCTGGATAGGATTATCGGG  
>HPVRTRX7\_Unclassified\_30315616\_nt7202\_L1\_Tile\_rc|2  
TTATCGGGACACCTGGTAGCTAAGGAATCAATAAATCTGTATGTGTCTCTGGATAGGATTA  
>HPVRTRX7\_Unclassified\_30315616\_nt7207\_L1\_Tile\_rc|1  
GATTTTTATCGGGACACCTGGTAGCTAAGGAATCAATAAATCTGTATGTGTCTCTGGATAG  
>HPVRTRX7\_Unclassified\_30315616\_nt7212\_L1\_Tile\_rc|1  
TGGTGGATTTTTATCGGGACACCTGGTAGCTAAGGAATCAATAAATCTGTATGTGTCTCTG  
>HPVRTRX7\_Unclassified\_30315616\_nt7217\_L1\_Tile\_rc|1  
TCCTTTGGTGGATTTTTATCGGGACACCTGGTAGCTAAGGAATCAATAAATCTGTATGTG  
>HPVRTRX7\_Unclassified\_30315616\_nt7397\_L1\_Tile\_rc|1  
CTTTTGATCCCCGTACAGAACTTCTATACGTTGAAGGCTTTGTACCGTTAACGGTCGTT  
>HPV90\_Alpha\_22138122\_nt6001\_VE|1  
ATATAGGGTGTTTAGGGTACGTTTGCCTGATCCCAATAAGTTTGGCCTTCCTGATGCATC  
>HPV96\_Beta\_50253426\_nt4321\_VE|1  
ATTTACAGGGGCTGTAAGGCAGCTGGCACATGCCCCCTGATGTTATTAATAAAGTTGAA  
>HPV65\_Gamma\_312100\_nt5791\_VE|1  
CAAATGTTTATCATAGGTTGCACTCCTGCTATTGGGGAACATTGGGATAAGGCTGAGCCT  
>HPV14D\_Beta\_396918\_nt2461\_VE|1  
GCTGAGTGACCAAGAAGACGAGGGAGACAATGGAGAATCTCAGCGACCGTTTCAATGCTC  
>HPV73\_Alpha\_1491692\_nt5521\_VE|1  
TACCTGCCCCCTGTGTCTGTGTCTAAGGTTGTAAGCACAGATGAATATGTAACAAGAACA  
>HPV75\_Beta\_2911544\_nt6721\_VE|1  
TAACAGGCCATTTTGGCTGCAACGAGCACAGGGTCATAACAATGGTATATGTTGGGAAAA  
>HPV103\_Unclassified\_109390382\_nt511\_VE|1  
TCAGCTACTAACAGTGCTAAACGAAAGTATGTTAGTCCTAGCCCGAAGCAGCGGGTAAT  
>HPV39\_Alpha\_333245\_nt6541\_VE|1  
CCTCTGATTCCCAGTTATTTAATAAGCCTTATTGGCTACATAAGGCCAGGGCCACAACA  
>HPV96\_Beta\_50253426\_nt6811\_VE|1  
ATAGGCCTTTTTGGCTGCAAAGGGCTCAAGGCCATAATAATGGTATTTGCTGGGGTAATC  
>HPV106\_Alpha\_71726710\_nt2641\_VE|1  
CAATGGAGACATTGGCCAGCCGTTTAGATGTGTGCCAGGAGAAGTTGCTAGAACTGTATG  
>HPV82\_Alpha\_6970427\_nt6151\_VE|1  
TTGAGGATGGCGATATGGTGGACACTGGTTTTGGGGCCATGGATTTTGCTAATTTACAAG  
>HPV31\_Alpha\_333048\_nt6481\_VE|1  
ACCATATTGGATGCAACGTGCTCAGGGACACAATAATGGTATTTGTTGGGGCAATCAGTT  
>HPV31\_Alpha\_333048\_nt6541\_VE|1  
ATTTGTTACTGTGGTAGATACCACACGTAGTACCAATATGTCTGTTTGTGCTGCAATTGC  
>HPV71\_Alpha\_12084981\_nt5821\_VE|1  
ATTTTTTTGCGATGGCTTTGTGGCGGCCTAGTGACAGCAAGGTATACCTGCCTCCTGCC  
>HPV88\_Gamma\_167600365\_nt2221\_VE|1  
TGCAACACATCCATGTTGGGTGTATATGGATATTAACCTTCGGAATGGACTAGATGGTAA  
>HPV93\_Beta\_37089393\_nt2521\_VE|1  
AATCTTTTTTACAAGGCTTTGGACACAATTAGAAGTGAAGTACCAAGAAGACGAGGGAG  
>HPV60\_Gamma\_9628566\_nt5851\_VE|1  
GATCCAAAACAAATGCAATTGTTTATTGTAGGATGTAAACCAGCCACTGGTGAACACTGG  
>HPV21\_Beta\_1020170\_nt2731\_VE|1  
CCAAGAAGACGAGGGAGAAAATGGAGAATCTCAGCGATCGTTTTCAATGTTCTGCAAGATC  
>HPV74\_Alpha\_27462483\_nt6511\_VE|1  
TTGGCTACAAAAGGCGCAAGGCCACAATAATGGCATTTGTTGGGGTAATCAATTGTTTGT  
>HPV16\_Alpha\_9627100\_nt6571\_VE|1  
GGTTACAACGAGCACAGGGCCACAATAATGGCATTTGTTGGGGTAACCAACTATTTGTTA  
>HPV60\_Gamma\_9628566\_nt4681\_VE|1  
GTCCTTCCCGCGTGTACAATTTGAATTTGAAAATCCCGCCTTTTTTAATGATGAGGTGA

>HPV1\_Mu\_9626063\_nt2191\_VE|1  
AGTGATTTTCATACTGTAACAGTAAAAGTCAGTTTTGGTTGCAGCCTCTGGCTGATGCTAA  
>HPV61\_Alpha\_9628574\_nt6691\_VE|1  
AAGCCATATTGGCTGCAACGTGCCCAGGGCCACAACAATGGTATTTGTTGGTTTAATGAA  
>HPV34\_Alpha\_9627334\_nt6181\_VE|1  
TATGTAAATATCCAGATTATCTAGGCATGGCCGAGATCCCTATGGCGATTCTATGTGGT  
>HPVcand85\_Alpha\_4574720\_nt31\_VE|1  
AAGGGTGTAACCGAAAACGGTCATGACCGAAAATCGGTGCATATATATAACCCAGCTTACA  
>HPV16\_Alpha\_9627100\_nt6211\_VE|1  
ACACAGTTATTCAGGATGGTGATATGGTTCATACTGGCTTTGGTGCTATGGACTTTACTA  
>HPVFA75/KI88-03\_Unclassified\_206902429\_nt2581\_VE|1  
AATCTTTTTTTGAAAGGCTTTGGACACAATTAGAGCTCAGTGATCAAGAAGACGAGGGAG  
>HPVcand85\_Alpha\_4574720\_nt5581\_VE|1  
ACGTAAACGTGTTCCCTATTTTCTTACAGATGGCTTTGTGGCGTTCTAGTGACAGCAAGG  
>HPV1\_Mu\_9626063\_nt6001\_VE|1  
TCTGTCTATAGAAGATGGTGACATGATGGATATTGGTTTTGGGGCTATGGATTTTGCTGCT  
>HPV43\_Alpha\_40804474\_nt6691\_VE|1  
AAAAGGCCAGGGACATAATAATGGCATTGTGTTTGGGAATCAGTTGTTTGTACAGTGG  
>HPV7\_Alpha\_9627389\_nt31\_VE|1  
GTAACCGAAAACGGTCCGACCGAAAACGGTACATATAAAAACCAACCCAAAAAACCTGAT  
>HPV101\_Unclassified\_109390389\_nt5611\_VE|1  
CCTCTGTTATTTCAGGATGGGGATATGTGTGATATTGGCTTTGGTGCCATGAATTTTGCTG  
>HPV45\_Alpha\_397022\_nt6541\_VE|1  
AAGCCATATTGGTTACATAAGGCCCAGGGCCATAACAATGGTATTTGTTGGCATAATCAG  
>HPV5\_Beta\_9627145\_nt4411\_VE|1  
GCAGGCACCTTGCCCCCTGATGTTATTAATAAAGTGGAAACAAACAACAGTTGCTGACAAT  
>HPV52\_Alpha\_397038\_nt5191\_VE|1  
ACGTACACGTAGTGGAACAAATTTGGGGCACGGGTACATTATTATCATGATATTAGTCC  
>HPVcand62\_Alpha\_39932599\_nt6691\_VE|1  
TCAGTTGTTTAATAAGCCATATTGGCTGCAGCGGGCGAGGGCCATAATAATGGTATTTG  
>HPV60\_Gamma\_9628566\_nt2101\_VE|2  
TAGTGTTTTGGGGACCTCCAGATACAGGAAAGTCTTATATTTGTTCTTCACTTACACGGT  
>HPV67\_Alpha\_3228267\_nt4291\_VE|1  
TCAAACATGCAAGGCGGCAGGCACCTGTCCCCCGGATGTTATTCTTAAAGTGGAAGAAC  
>HPV91\_Alpha\_22023568\_nt6301\_VE|1  
ACGTAGCAATGGATTATAAACAAACACAGCTATGTATTGTTGGCTGTACACCTCCCATGG  
>HPV35\_Alpha\_333050\_nt1231\_VE|1  
AAGCGACGATTATTTGAACTACCAGACAGCGGTTATGGCAATTCTGAAGTGGAATACAC  
>HPV34\_Alpha\_9627334\_nt1231\_VE|1  
GGAACAAGACAGCGGATATGGCAATACTGAAGTGGAACGTACGAGAGACAGGTACCGGG  
>HPV2\_Alpha\_9626032\_nt5761\_VE|1  
ACGTAAACGTGTCCACTATTTCTTTGCAGATGGCTTTGTGGCGGCCTAATGAAAGCAAGG  
>HPV53\_Alpha\_9627377\_nt5611\_VE|1  
TTTGAAACGTAGGCGTCGTAAACGTATTCCTATTTTCTTGCAGATGGCGGTGTGGCGGC  
>HPV33\_Alpha\_333049\_nt1261\_VE|1  
TAGAAGACAGCGGATATGGCAATACTGAAGTGGAACCTCAGCAGATGGTACAACAGGTAG  
>HPV6\_Alpha\_6002612\_nt2731\_VE|1  
CAATAGCCAAGCGTTTAGATGCGTGCCAGGAACAGTTGTTAGAACTTTATGAAGAAAACA  
>HPV76\_Beta\_2911551\_nt6751\_VE|1  
ATAGGCCCTTTTGGCTACAACGAGCACAGGGTCATAACAATGGCATTGTTGGGAAAATC  
>HPV8\_Beta\_333074\_nt2641\_VE|1  
AATCTTTTTTTGCAAGGCTTTGGACACAATTAGAGCTGAGTGATCAAGAAGACGAGGGCG  
>HPV50\_Gamma\_9628550\_nt6181\_VE|1  
ACCATATTGGATTTCGACAGAGCTCAGGGTACGAACAATTGTATTTGTTGGGGTAATGAGGT  
>HPV48\_Gamma\_9628542\_nt4501\_VE|1

GCCTTCTCGATTGGTGCAGTTTGTAGTTTGAAAATCCCGCCTTTGATCCAGATATTAGTAT  
>HPV32\_Alpha\_9627327\_nt2701\_VE|1  
TCAGAGGACGAGGAAGAAAATGGAGACACTGGCCAAACGTTTAGATGCGTGCCAGGAACA  
>HPV4\_Gamma\_9626597\_nt4651\_VE|1  
ATTTGAAAATCCCGCCTTTGATGCTGACATCACTCAAACATTTGAGCGGGATTTAGAACA  
>HPV26\_Alpha\_9627305\_nt2731\_VE|1  
AGAAAATGGAGAACCTTTGCCAGCGTTTAAATGCGTGCCAGGAGAAAATACTAGACTATT  
>HPV36\_Beta\_1020218\_nt4381\_VE|1  
CAAGCAGGCACATGCCCCCTGATGTTGTGAATAAAGTGGAACAAACAACAGTTGCTGAC  
>HPV10\_Alpha\_9627257\_nt2401\_VE|1  
CAGCCATTTTGGTTGCAGCCATTATCTGAAGCCAAAATAGGACTGTTAGATGATGCAAC  
>HPV41\_Nu\_9626041\_nt6481\_VE|1  
TACTGAGCAGCAGCTGTTTAACAGGCCCTTTTGGCTGCAGAGATCCCAGGGCCATAACAA  
>HPV61\_Alpha\_9628574\_nt6661\_VE|1  
ATGGTGTCTCTGATTCCCAATTATTTAATAAGCCATATTGGCTGCAACGTGCCAGGGC  
>HPV72\_Alpha\_1491683\_nt5761\_VE|1  
TAAACGTGTGCCCTATTCTTTTGCAGATGGCTTTGTGGCGGCCTGGTGACGGCAAGGTAT  
>HPV40\_Alpha\_397014\_nt2611\_VE|1  
AGGGTTCAAGTGTTTGAATTTCCAAATCCATTTCCATTTGACAGCAACGGCAATGCTGTG  
>HPV18\_Alpha\_9626069\_nt31\_VE|1  
AAAAGGGAGTAACCGAAAACGGTCGGGACGAAAACGGTGTATATAAAAAGATGTGAGAAA  
>HPV101\_Unclassified\_109390389\_nt6151\_VE|1  
ACTACCTCAGACATGTGGAGGAATTTGAAATTTCTCTCATTGTGCAGCTCTGTAAAGTGT  
>HPV69\_Alpha\_6970418\_nt2731\_VE|1  
AATGGAGAACCCTTTGCCAGCGTTTAAATGCGTGCCAGGAGAAAATACTAGACTATTATGA  
>HPV32\_Alpha\_9627327\_nt2731\_VE|1  
GGCCAAACGTTTAGATGCGTGCCAGGAACAGTTGTTAGAACTGTATGAGGAAGATAGTAA  
>HPV56\_Alpha\_397053\_nt5791\_VE|1  
TGCATATCAATATAGGGTATTTAGGGTACGGTTGCCCCGACCCTAATAAGTTTGGGCTTCC  
>HPV2\_Alpha\_9626032\_nt2701\_VE|1  
ACCGTTTAGATGCGTGCCAGGAGACGTTGCTAGAACTGTATGAAAAGGATAGCAACAAAC  
>HPV88\_Gamma\_167600365\_nt6031\_VE|1  
AAGATGTTTATGGCGATAAATGTTTCTTTTGGAAAACGTGAGCAGTCGTATGCTCGCC  
>HPV48\_Gamma\_9628542\_nt6151\_VE|1  
GGCTTAGACGAGCCAGGGAACAAATAATGGCATTGTTGGGGAAATGAGCTGTTTATTA  
>HPV103\_Unclassified\_109390382\_nt5491\_VE|1  
GGTGCATGTCTCCTTTAGAGCTTGTTAGTTCCATTATTGAGGATGGGGATATGTGTGAT  
>HPV34\_Alpha\_9627334\_nt6421\_VE|1  
ATAAGCCTTATTGGTTGCAAAAGGCCCAGGGACAAAACAATGGCATTGCTGGCATAATC  
>HPV68a\_Alpha\_71726685\_nt6421\_VE|1  
TGGCTGCACAAGGCACAGGGACACAACAATGGTATTTGTTGGCATAATCAATTATTTCTT  
>HPV34\_Alpha\_9627334\_nt5701\_VE|1  
CAGGTTTGCAATACAGGTATTTAGAATACGTTTGCCAGATCCCAATAAATTTGGGTTC  
>HPV58\_Alpha\_222386\_nt1261\_VE|1  
GAGCTAGAAGACAGCGGATATGGCAATACTGAAGTGGAACCTGAGCAGATGGCACACCAG  
>HPV68a\_Alpha\_71726685\_nt1741\_VE|1  
GCAGCATTATATTGGTATAGAACAGGAATATCTAATATTAGTGAGGTGTGTGGCGACACG  
>HPV69\_Alpha\_6970418\_nt6121\_VE|1  
TTATTGAGGATGGTGATATGATTGATACTGGCTTTGGTGCCATGGATTTTACAGCTTTGC  
>HPV31\_Alpha\_333048\_nt2641\_VE|1  
TCAAGGACGTGGTGAGATTAAATTTGCACGAGGAAGAGGACAAAGAAAACGATGGAGAC  
>HPV54\_Alpha\_9628437\_nt6511\_VE|1  
ATATTTAATAAGCCATACTGGTTACAACGGGCCAGGGTCAAAACAATGGTATTTGTTGG  
>HPV41\_Nu\_9626041\_nt2281\_VE|1  
CGTCGGACACAGGCAAATCATATTTTGCCAATGGTCTTAACAAATTTTGGATGGACACG

>HPV27\_Alpha\_396964\_nt2701\_VE|1  
ACACTAGCGAACCGTTTAGATGCGTGCCAGGAGACGTTGCTAGAACTTTATGAAAAAGAT  
>HPV88\_Gamma\_167600365\_nt2191\_VE|1  
GCAAGATACTAAATTAGGCTTCCTAGATGATGCAACACATCCATGTTGGGTGTATATGGA  
>HPV35\_Alpha\_333050\_nt5641\_VE|1  
GCACTGATGAATATGTAACACGCACAAACATCTACTATCATGCAGGCAGTTCTAGGCTAT  
>HPV69\_Alpha\_6970418\_nt6481\_VE|1  
TACAGCGTGCCAGGGTCATAATAATGGCATTTGTTGGGGCAACCAATTGTTTGTACTT  
>HPV41\_Nu\_9626041\_nt4051\_VE|1  
AGTGTAGGGGTTTTCTTTGGCGGTCTGGGCATTGGCACAGGACGTGGTGGCGGTGGCACA  
>HPV41\_Nu\_9626041\_nt6511\_VE|1  
TTGGCTGCAGAGATCCCAGGGCCATAACAAATGGCATACTGTGGCACAACGAGGCCTTTGT  
>HPV55\_Alpha\_1020266\_nt6601\_VE|1  
TTAATAAGCCTTTTTGGTTGCAAAGGGCGCAGGGCCACAATAATGGTATTTGTTGGGGGA  
>HPV51\_Alpha\_333087\_nt2731\_VE|1  
ATGCCACCGTTTAAATGTGTGCCAGGAGAAAATACTAGACTGTTATGAACTGGACAGTGA  
>HPV1\_Mu\_9626063\_nt2551\_VE|1  
GCAACAGTTAGAATTAAGTGACCAAGAAGACGAGGGAAACGATGGAAAACCTCAGCAGTC  
>HPV65\_Gamma\_312100\_nt5881\_VE|1  
TGTCTCCTATAGAGCTTGTGAACACATATATTGAGGATGGGGATATGTGTGATATTGGT  
>HPV29\_Alpha\_1020210\_nt2731\_VE|1  
AGAACCTAGCGAACCGTTTAGATGCGTGCCAGGACAAAATACTAGAACTGTATGAAAGAG  
>HPV70\_Alpha\_1173493\_nt6481\_VE|1  
GTCTCTTCTGATTCCCAGTTGTTTAATAAGCCCTATTGGTTGCATAAGGCCAGGGACAC  
>HPV1\_Mu\_9626063\_nt6361\_VE|2  
TCTTACTGGCTTCAGCGATGTCAAGGCCAGAATAATGGCATTTGCTGGAGAAACCAGTTA  
>HPV60\_Gamma\_9628566\_nt6331\_VE|1  
AATAGACCTTATTGGCTTCACAGAGCCCAGGTGCAAATAATGGTATTTGTTGGGGTAAC  
>HPV26\_Alpha\_9627305\_nt6511\_VE|1  
TAAGCCATACTGGTTACAACGTGCACAGGGTCATAATAATGGTATCTGTTGGGGCAATCA  
>HPV30\_Alpha\_396973\_nt6571\_VE|1  
TTAATAAACCTTACTGGTTGCAACGCGCACAGGGACACAATAATGGCATTTGTTGGGGCA  
>HPV63\_Mu\_9626605\_nt2581\_VE|1  
GCCAGTTAGACTTAAGTGACCAAGAAGACGAGGAGAGTGATGGAAAGCCTCAACAACCGC  
>HPV101\_Unclassified\_109390389\_nt5641\_VE|1  
ATATTGGCTTTGGTGCCATGAATTTTGTGCTGCTTGCAGGCTGATCACTCAGGGGTACCCC  
>HPV42\_Alpha\_333211\_nt2701\_VE|1  
TATGGAGAGACTGGCCAAACGTTTAGATGCGTGCCAGGAACAGTTGTTAGAACTGTATGA  
>HPV53\_Alpha\_9627377\_nt5641\_VE|1  
CTATTTTCTTGCAGATGGCGGTGTGGCGGCCTAGTGACAGCAAGGTTTATCTGCCTCCTA  
>HPV61\_Alpha\_9628574\_nt5731\_VE|1  
AACGTCGTAAACGTGTACCCTATTCTTTTCAGATGGCTTTGTGGCGGCCTGGTGACGGC  
>HPVTRX7\_Unclassified\_30315616\_nt4411\_VE|1  
AAACAAGCAGGCACTTGCCCCCTGATGTTCTTAATAAAGTGGAGCAAACAACAGTTGCT  
>HPV67\_Alpha\_3228267\_nt1201\_VE|1  
CGCAAAACGCAGAGCATACGACATAGAAGACGCGGATATGGCAATACTGAAGTGGAAAC  
>HPV58\_Alpha\_222386\_nt6571\_VE|1  
CTTATTGGCTACAGCGTGCACAAGGTCATAACAATGGCATTTGCTGGGGCAATCAGTTAT  
>HPVFA75/KI88-03\_Unclassified\_206902429\_nt2611\_VE|1  
TAGAGCTCAGTGATCAAGAAGACGAGGGAGAGGATGGAACTCTCAGCGCACGTTTCAAT  
>HPV40\_Alpha\_397014\_nt6361\_VE|1  
GATGGCGACATGGTGGATACTGGCTTTGGTGCTATGGATTTTGCTTCCTTGCAGGCCAAT  
>HPV52\_Alpha\_397038\_nt5731\_VE|1  
GCACAAGCATCTATTATTATGCAGGCAGTTCTCGATTACTAACAGTAGGACATCCCTATT  
>HPV10\_Alpha\_9627257\_nt2791\_VE|1

CGAACCGTTTAGATGCGTGCCAGGACAAAATGCTAGAACTATATGAAAAGGATAGCGACA  
>HPV52\_Alpha\_397038\_nt6601\_VE|1  
GTGCGCAGGGCCACAATAATGGCATATGTTGGGGCAATCAGTTGTTTGTACAGTTGTGG  
>HPV58\_Alpha\_222386\_nt6601\_VE|1  
ACAATGGCATTGCTGGGGCAATCAGTTATTTGTTACCGTGGTTGATACCACTCGTAGCA  
>HPV96\_Beta\_50253426\_nt2761\_VE|1  
TTTTTTTCAAAGGCTTTGGAAGCAGTTAGATCTAAGTGACCAAGAAGACGAGGGGGAGGA  
>HPV48\_Gamma\_9628542\_nt6421\_VE|1  
TTATGAATCCCAGAATATTAGAGGAGTGGAATTAGCTTTTGTTCACCAGCTCCAACGG  
>HPV72\_Alpha\_1491683\_nt2731\_VE|1  
GCACTAGCCGACCGTTTAGATGCGTGCCAGGAGAAATTGCTAGACCTTTATGAAAAAGAT  
>HPV91\_Alpha\_22023568\_nt6451\_VE|1  
AGGATGGTGATATGGTAGATACAGGGTTTGGTGCACCTTGATTTTGCATCCTTACAAGCCA  
>HPV97\_Alpha\_71726694\_nt2311\_VE|1  
CATTTGTAAATTCAAATAGCCATTTTTGGTTAGAACC GTTAGCGGATGCCAAGGTAGCCA  
>HPV60\_Gamma\_9628566\_nt5701\_VE|1  
TTGGAAGGCCTTGAAATTGGTAGAGGTGGGCCCTTAGGAATTGGAACCTCTGGCCATCCA  
>HPV71\_Alpha\_12084981\_nt2701\_VE|1  
ACAATGGAGACACTGGCCAGCCGTTTAGATGCGTGCCAGGAGACGTTACTAGAACTGTAT  
>HPV9\_Beta\_9627396\_nt2641\_VE|1  
GTTAGATCTGAGTGATCAAGAAGACGAGGGAGAGGATGGAACTCTCAGCGCACGTTTCA  
>HPV51\_Alpha\_333087\_nt631\_VE|1  
ATGCTACGAGCAATTTGACAGCTCAGAGGAGGATGAAGTAGATAATATGCGTGACCA  
>HPV26\_Alpha\_9627305\_nt6541\_VE|1  
TCATAATAATGGTATCTGTTGGGGCAATCAATTGTTTGTACCTGTGTTGATACCACCCG  
>HPV67\_Alpha\_3228267\_nt6541\_VE|1  
ATAAACCATATTGGTTACAACGCGCACAAAGGTCATAACAATGGTATATGCTGGGGTAATC  
>HPV92\_Beta\_27531786\_nt2521\_VE|1  
TGGAGGCAATTAGATCTAAGTGACCAAGAAGACGAGGGTGAGGATGGAGGCTCTCAGCGA  
>HPV13\_Alpha\_85827580\_nt6661\_VE|1  
TACAAAAGGCCCAGGGACACAATAATGGTATATGTTGGGGCAATCACTTGTTTGTACTG  
>HPV95\_Gamma\_40804520\_nt5461\_VE|1  
ACATCACTATACTTCCACGCTGGAACAGAAAGACTTTTAACTGTAGGCCATCCTTATTTT  
>HPV15\_Beta\_396924\_nt2581\_VE|1  
GAAATCTTTTTTTGAAAGGCTTTGGAGACAGTTAGAGCTCAGTGATCAAGAAGACGAGGG  
>HPV88\_Gamma\_167600365\_nt4591\_VE|1  
CCGGCCTTCACGCGCGGTTCAATTTGAATTTGAAAATCCCGCCTTTACTGGTGATGTAAG  
>HPV36\_Beta\_1020218\_nt2671\_VE|1  
TGGACACAATTAGAACTCAGTGACCAAGAAGACGAGGGCGAAAATGGAGAATCTCAGCGA  
>HPV23\_Beta\_1020186\_nt2671\_VE|1  
TTGGATACAATTAGGACTCAGTGACCAAGAGGACGAGGGAGAGGATGGAAGCACTCAGCG  
>HPV21\_Beta\_1020170\_nt2701\_VE|1  
AAGGCTTTGGAATCAATTAGAGCTGAGTGACCAAGAAGACGAGGGAGAAAATGGAGAATC  
>HPV88\_Gamma\_167600365\_nt5491\_VE|1  
AAATTGAGATTCCTAAGGTGTCTGCATGCCAATATCGAGTGTTTAGGCTGAAATTGCCTG  
>HPV50\_Gamma\_9628550\_nt5341\_VE|1  
TGCACGCAGTGAGCGTTTACTAATTGTGGGACACCCATATTATGATATAGAAGATGGTGG  
>HPV73\_Alpha\_1491692\_nt4141\_VE|1  
ATAAAACATGTAAACAAGCAGGTACGTGCCCTCCTGATGTAATTCCCAAGGTTGAAGGTA  
>HPV12\_Beta\_396910\_nt2641\_VE|1  
GACCAAAGCTGGAAATCTTTTTTTGAAAGGCTTTGGACACAATTAGACCTGAGTGACCAA  
>HPV15\_Beta\_396924\_nt2611\_VE|1  
GTTAGAGCTCAGTGATCAAGAAGACGAGGGAGACGATGGATACTCTCAGCGAACGTTTCA  
>HPVcand89\_Alpha\_22095322\_nt2641\_VE|1  
CGACCGTTTAGATGCGTGCCAGGAGAGGTTAATAGACCTTTATGAAAAGGATAGCAACAA



>HPV73\_Alpha\_1491692\_nt1231\_VE|1  
TTTGAGGAGCAGGACAGTGGATATGGCAATACTGAAGTGGAACTTACGAGACAGAGGTA  
>HPV77\_Alpha\_2911558\_nt4441\_VE|1  
AAAACCTGCAAAGCAGCAGGCACATGCCCCCTGATGTTATTCCCAAGGTTGAGGGCACT  
>HPV31\_Alpha\_333048\_nt1231\_VE|1  
AGACTCTTTGAACTTCCAGACAGCGGGTATGGCAATACTGAAGTGGAAACGCAGCAGATG  
>HPV59\_Alpha\_557236\_nt5161\_VE|1  
CAAATTGGGGCCCGTGACATTTTTTATCATGATATAAGCCCTATACCACATGCTGAAGAT  
>HPV56\_Alpha\_397053\_nt6511\_VE|1  
ATTTAATAAAACCTTATTGGTTGCAACGTGCCCAAGGCCATAATAATGGCATTGTGCTGGGG  
>HPVTRX7\_Unclassified\_30315616\_nt5941\_VE|1  
TAACGGTAAGGCTCTATCTACCACCATCAACACCAGTGGCCAGGGTGCAAAGCACGGATGA  
>HPV11\_Alpha\_333026\_nt2701\_VE|1  
GAGGATTTCAGAGGACGAGGAAGATGGAAGCAATAGCCAAGCGTTTAGATGCGTGCCAGGA  
>HPV24\_Unclassified\_9628486\_nt2611\_VE|1  
TAAAAGGCTTTGGAGACAATTAGACCTCAGTGACCAAGAAGACGAGGGAGAGGATGGAGA  
>HPV81\_Alpha\_40804509\_nt6781\_VE|1  
GTTTAATAAGCCTTATTGGCTACAACGGGCACAGGGCCATAATAATGGCATTGTGTTGGTT  
>HPV7\_Alpha\_9627389\_nt6361\_VE|1  
AAAAAGTGAAGTTATTGAGGATGGCGACATGGTTGATGCAGGCTTTGGTGCCATGGATTT  
>HPV107\_Beta\_126131393\_nt7351\_VE|1  
AAGTGGTATGTGAAGCATTTTTTAACCGTGTCGTGACTAAACCGAACAAGTCAACACCA  
>HPV4\_Gamma\_9626597\_nt5461\_VE|1  
TACAGAAAAGGCTTTTAACTGTAGGCCATCCTTATTTTCCAGTGAAAGATGTACAGGAACC  
>HPV4\_Gamma\_9626597\_nt4621\_VE|1  
GACACAGCCTTCCCGCGCAATAGTATTTGGATTTGAAAATCCCGCCTTTGATGCTGACAT  
>HPV44\_Alpha\_1020242\_nt6601\_VE|1  
TTAATAAGCCTTTTGGTTGCAAAAGGCGCAGGGCCACAATAATGGTATTTGTTGGGGAA  
>HPV94\_Alpha\_40804528\_nt2791\_VE|1  
CGAACCGTTTAGATGCGTGCCAGGACAAAATGCTAGAACTTTATGAAAAGGATAGCAACA  
>HPV69\_Alpha\_6970418\_nt6451\_VE|1  
ATGCTCAATTGTTTAATAAACCTTACTGGTTACAGCGTGCCAGGGTCATAATAATGGCA  
>HPV107\_Beta\_126131393\_nt2701\_VE|1  
AAATCTTTTTTTGAAAGGCTTTGGACACAATTAGAGCTGAGTGACCAAGAAGACGAGGGA  
>HPV11\_Alpha\_333026\_nt2731\_VE|1  
AATAGCCAAGCGTTTAGATGCGTGCCAGGATCAGTTGTTAGAACTTTATGAAGAAAACAG  
>HPV50\_Gamma\_9628550\_nt5581\_VE|1  
TGGTCATCCCTTGTTTAATAAGGTTGGAGACACAGAAAATCCTAGCTTTTACTTAGGTCC  
>HPV38\_Beta\_1020234\_nt2611\_VE|1  
CTTTAAAAGGCTGTGGACACAATTAGAGCTCAGTGATCAAGAAGACGAGGGAGACAATGG  
>HPVcand89\_Alpha\_22095322\_nt5731\_VE|1  
AACGTGTCCCTATTCTTTTGCAGATGGCTTTGTGGCGGCCTGGTGACGGCAAGGTATAC  
>HPV110\_Beta\_186461194\_nt2611\_VE|1  
AGTGATCAAGAAGAAGAGGGAGACGATGGAAACTCTCAGCGATCGTTTCAATGCACTGCA  
>HPV13\_Alpha\_85827580\_nt6631\_VE|1  
AGGCCCAGTTGTTTAATAAACCTTATTGGTTACAAAAGGCCAGGGACACAATAATGGTA  
>HPV70\_Alpha\_1173493\_nt6511\_VE|1  
CCCTATTGGTTGCATAAGGCCAGGGACACAATAATGGCATTGTGTTGGCATAACCAGTTG  
>HPV111\_Beta\_186461202\_nt2581\_VE|1  
AGCTCTGATCAAGAAGACGAGGGAGAGGATGGAAACACTCAGCGAACGTTTCAATGCACT  
>HPV103\_Unclassified\_109390382\_nt5551\_VE|1  
ATTGGCTTTGGTGCAATGAATTTTGCTACATTGCAGGAGGACCATTTCAGGTGTACCCTTG  
>HPV50\_Gamma\_9628550\_nt5551\_VE|1  
GAGAGGTGGGCCCTTTAGGTGTTGGATCTACTGGTCATCCCTTGTTTAATAAGGTTGGAGA  
>HPV59\_Alpha\_557236\_nt2011\_VE|1

TAGTAACGCCGCTGCATTTTTTAAAAAGCAACTGCCAGGCAAAATACCTAAAAGATTGTGC  
>HPV65\_Gamma\_312100\_nt4621\_VE|1  
AATAGTTTTTGGATTTGAAAATCCCGCCTTTGACGCTGACATCAAGTATTTGAGCG  
>HPV52\_Alpha\_397038\_nt2041\_VE|1  
CGCAAGCAAAAATAGTAAAGGACTGTGCAACCATGTGTAGACATTATAAACGGGCAGAAA  
>HPV48\_Gamma\_9628542\_nt3391\_VE|1  
ACGGTTACTCACGACTTGGACGATTACAGGAAGAAGCTCGGGATCCGCCATTAGTGTTAT  
>HPV95\_Gamma\_40804520\_nt6121\_VE|1  
CGAAGGGAACAGCTTTTATGCAAGACACTTTTTTGTAGAGCTGGGACAATGGGTGATGCG  
>HPV48\_Gamma\_9628542\_nt6121\_VE|1  
GCGATTCTCAGTTATTTAATAGGCCTTATTGGCTTAGACGAGCCCAGGGAACAAATAATG  
>HPV12\_Beta\_396910\_nt5881\_VE|1  
TACCACCATCAACACAGTGGCCAGGGTGCAAAGCACGGATGAATACATTCAAAGGACTA  
>HPV57\_Alpha\_60882\_nt2701\_VE|1  
CGTTTAGATGCGTGCCAGGAGACGTTGCTAGAACTGTATGAAAAAGATAGCAACAACTT  
>HPV43\_Alpha\_40804474\_nt6331\_VE|1  
TTATACAGGATGGTGACATGGTAGATACAGGATTTGGTGCAATGGATTTTGCTTCCCTAC  
>HPV82\_Alpha\_6970427\_nt6511\_VE|1  
ATCGCGCCCAGGGCCACAATAATGGCATTGCTGGAATAATCAGCTTTTTTATTACTTGTG  
>HPV65\_Gamma\_312100\_nt5431\_VE|1  
TTCCACGCTGGAACAGAAAGCCTTTTAACGTAGGCCATCCTTATTTTCCAGTGAAAGAT  
>HPV82\_Alpha\_6970427\_nt6481\_VE|1  
CTCAGATTTTTTAATAAGCCTTATTGGTTGCATCGCGCCCAGGGCCACAATAATGGCATT  
>HPV94\_Alpha\_40804528\_nt4441\_VE|1  
GCAAAGCCTCAGGCACATGCCCCCAGATGTTATTCCCAAAGTGGAAGGCACCACTTTGG  
>HPV58\_Alpha\_222386\_nt31\_VE|1  
TAGGGTGTAACCGAAAACGGTCTGACCGAAAACCGGTGCATATATAAAGCAGACATTTTTT  
>HPV30\_Alpha\_396973\_nt5641\_VE|1  
TTTTCTTGACAGATGGCGGTGTGGCGGCCTAGTGAAACCAAGGTTTACCTGCCTCCTACAC  
>HPV8\_Beta\_333074\_nt4321\_VE|1  
ACATTTATCAAACCTGCAAACAGGCAGGTACATGCCCCCTGATGTTATTAATAAAGTTG  
>HPV54\_Alpha\_9628437\_nt6541\_VE|1  
GCCCAGGGTCAAAACAATGGTATTTGTTGGGGCAATCAGGTGTTTTTAACAGTTGTAGAT  
>HPV97\_Alpha\_71726694\_nt6421\_VE|1  
CCATATTGGTTGCATAGGGCCCAGGGCCATAACAATGGTATTTGTTGGCATAATCAATTA  
>HPV101\_Unclassified\_109390389\_nt1741\_VE|1  
GTTTGTAATAGCAGAAGCAATTTTGGTTGCAACCACTAGTAGATGGGAAAATAGGGCT  
>HPV68a\_Alpha\_71726685\_nt6061\_VE|1  
AATACTCCTATTGAGGATGGCGATATGATTGATACAGGATATGGTGCTATGGACTTTGGT  
>HPV1\_Mu\_9626063\_nt4711\_VE|1  
AGTCAATGGTCACTTTTGATAATCCAGCATTTGAGCCAGAGCTTGATGAGGTGTCTATTA  
>HPV66\_Alpha\_1020290\_nt6541\_VE|1  
ATTACCTCTGAGGCCCAATTATTTAATAAACCTTATTGGTTGCAACGTGCACAGGGCCAT  
>HPV68a\_Alpha\_71726685\_nt2221\_VE|1  
GGGCCGCCAAATACAGGCAAGTCATATTTTGCATGAGCCTTATACATTTTTTACAAGGC  
>HPV101\_Unclassified\_109390389\_nt481\_VE|1  
GCAGCTAGAGGACGACACGACGAGCTTAAGATTCTAAAACGAAAGTACTTTAGTCCTAG  
>HPV55\_Alpha\_1020266\_nt1051\_VE|1  
GCGGCTGTGCAGGACCTAAAACGAAAGTATTTAGGTAGTCCATATGTGAGTCCTTTAAGC  
>HPV34\_Alpha\_9627334\_nt6391\_VE|1  
CTATGGTATCCTCAGATGCACAAATTTTTTAATAAGCCTTATTGGTTGCAAAAGGCCAGG  
>HPV59\_Alpha\_557236\_nt1261\_VE|1  
AGACAGCGGCTATGGCTATTCTGAAGTGGAATGCTCGAGACTCAGGTAACCGTGGAGAA  
>HPV67\_Alpha\_3228267\_nt4261\_VE|1  
GCGCAAACGTGCCCTCTGCAACACAACCTATATCAAACATGCAAGGCGGCAGGCACCTGTCC

>HPV77\_Alpha\_2911558\_nt2731\_VE|1  
TGGAGAACCTAGCGAGCCGTTTAGATGCGTGCCAGGACAAAATGCTAGAACTCTATGAAA  
>HPV43\_Alpha\_40804474\_nt31\_VE|1  
GGGACCGAAAACGGTCCGACCGAAAGCGGTACATATATAAACACCCAAAAACCATAGCT  
>HPV42\_Alpha\_333211\_nt1951\_VE|1  
CAACGGGCAGACAGGGATAGCAATGCTGCTGCATTTTTTAAAAAGTAACTGCCAGGCAAAA  
>HPV82\_Alpha\_6970427\_nt631\_VE|1  
TTGCAATGCTACGAGCAATTTGACAGCTCAGACGAGGAGGATGAAGTAGATAATATGCGT  
>HPV44\_Alpha\_1020242\_nt1051\_VE|1  
TATGCGGCTGTGCAGGACCTAAACGAAAAGTATTTAGGTAGTCCATATGTTAGTCCTTTA  
>HPV18\_Alpha\_9626069\_nt5581\_VE|1  
GAAACGTAAACGTGTTCCCTATTTTTTGCAGATGGCTTTGTGGCGGCCTAGTGACAATA  
>HPV50\_Gamma\_9628550\_nt2491\_VE|1  
CTTAGATTTACCTGAAGATGACCCAGATGGAGACACAGGAACTCTGAGCGCACGTTTTTC  
>HPV37\_Beta\_1020226\_nt2641\_VE|1  
TCTCAGTGACCAAGAAGACGAGGGAGACGATGGACACACTCAGCGATCGTTTCAATGCAC  
>HPV54\_Alpha\_9628437\_nt5581\_VE|1  
GTAAACGTTTCCCATATTTTCTTGCGATGGCTATGTGGCGGCCTAGCGAAAACAAAGTA  
>HPV91\_Alpha\_22023568\_nt91\_VE|1  
GCTTGTAATAAGGGAGTAACCGAAAACGGTCCGACCGAAAGCGGTACATATATAAACCA  
>HPV66\_Alpha\_1020290\_nt6571\_VE|1  
CCTTATTGGTTGCAACGTGCACAGGGCCATAATAATGGCATATGCTGGGGTAATCAGGTA  
>HPV70\_Alpha\_1173493\_nt6031\_VE|1  
TCTGTGGACTATAAGCAAACACAGTTATGTATTATAGGCTGTGTTCTTGCTATGGGAGAG  
>HPV90\_Alpha\_22138122\_nt6001\_VE\_rc|1  
GATGCATCAGGAAGGCCAACTTATTGGGATCAGGCAAACGTACCCTAAACACCCTATAT  
>HPV96\_Beta\_50253426\_nt4321\_VE\_rc|1  
TTCAACTTTATTAATAACATCAGGGGGGCATGTGCCAGCTGCCTTACAGCCCCTGTAAAT  
>HPV65\_Gamma\_312100\_nt5791\_VE\_rc|1  
AGGCTCAGCCTTATCCCAATGTTCCCAATAGCAGGAGTGCAACCTATGATAAACATTTG  
>HPV14D\_Beta\_396918\_nt2461\_VE\_rc|1  
GAGCATTGAAACGGTCGCTGAGATTCTCCATTGTCTCCCTCGTCTTCTTGGTCACTCAGC  
>HPV73\_Alpha\_1491692\_nt5521\_VE\_rc|1  
TGTTCTTGTTACATATTCATCTGTGCTTACAACCTTAGACACAGACACAGGGGGCAGGTA  
>HPV75\_Beta\_2911544\_nt6721\_VE\_rc|1  
TTTTCCCAACATATACCATTGTTATGACCTGTGCTCGTTGCAGCCAAAATGGCCTGTTA  
>HPV103\_Unclassified\_109390382\_nt511\_VE\_rc|1  
ATTACCCGCTGCTTCGGGCTAGGACTAACATACTTTTCGTTTTAGCACTGTTAGTAGCTGA  
>HPV39\_Alpha\_333245\_nt6541\_VE\_rc|1  
TGTTGTGGCCCTGGGCCTTATGTAGCCAATAAGGCTTATTAAATAACTGGGAATCAGAGG  
>HPV96\_Beta\_50253426\_nt6811\_VE\_rc|1  
GATTACCCCAGCAAATACCATTATTATGGCCTTGAGCCCTTTGCAGCCAAAAAGGCCTAT  
>HPV106\_Alpha\_71726710\_nt2641\_VE\_rc|1  
CATACAGTTCTAGCAACTTCTCCTGGCACACATCTAAACGGCTGGCCAATGTCTCCATTG  
>HPV82\_Alpha\_6970427\_nt6151\_VE\_rc|1  
CTTGTAATTAGCAAAATCCATGGCCCCAAAACAGTGTCCACCATATCGCCATCCTCAA  
>HPV31\_Alpha\_333048\_nt6481\_VE\_rc|1  
AACTGATTGCCCCAACAAATACCATTATTGTGTGCCCTGAGCACGTTGCATCCAATATGGT  
>HPV31\_Alpha\_333048\_nt6541\_VE\_rc|1  
GCAATTGCAGCACAAACAGACATATTGGTACTACGTGTGGTATCTACCACAGTAACAAAT  
>HPV71\_Alpha\_12084981\_nt5821\_VE\_rc|1  
GGCAGGAGGCAGGTATACCTTGCTGTCACTAGGCCGCCACAAAGCCATCTGCAAAAAAAT  
>HPV88\_Gamma\_167600365\_nt2221\_VE\_rc|1  
TTACCATCTAGTCCATTCCGAAGGTTAATATCCATATACACCCAACATGGATGTGTTGCA  
>HPV93\_Beta\_37089393\_nt2521\_VE\_rc|1

CTCCCTCGTCTTCTTGGTCACTCAGTTCTAATTGTGTCCAAAGCCTTGTAAGGATTT  
>HPV60\_Gamma\_9628566\_nt5851\_VE\_rc|1  
CCAGTGTTTACCAGTGGCTGGTTTACATCTTACAATAACAATTGCATTTGTTTTGGATC  
>HPV21\_Beta\_1020170\_nt2731\_VE\_rc|1  
GATCTTGCAGAACATTGAAACGATCGCTGAGATTCTCCATTTTCTCCCTCGTCTTCTTGG  
>HPV74\_Alpha\_27462483\_nt6511\_VE\_rc|1  
ACAAACAATTGATTACCCCAACAAATGCCATTATTGTGGCCTTGCGCCTTTTGTAGCCAA  
>HPV16\_Alpha\_9627100\_nt6571\_VE\_rc|1  
TAACAAATAGTTGGTTACCCCAACAAATGCCATTATTGTGGCCCTGTGCTCGTTGTAACC  
>HPV60\_Gamma\_9628566\_nt4681\_VE\_rc|1  
TCACCTCATCATTAAGGCGGGGATTTTCAAATTCAAATTGTACAGCGCGGAAGGAC  
>HPV1\_Mu\_9626063\_nt2191\_VE\_rc|1  
TTAGCATCAGCCAGAGGCTGCAACCAAACTGACTTTTACTGTTACAGTATGAAATCACT  
>HPV61\_Alpha\_9628574\_nt6691\_VE\_rc|1  
TTCATTAAACCAACAAATACCATTGTTGTGGCCCTGGGCACGTTGCAGCCAATATGGCTT  
>HPV34\_Alpha\_9627334\_nt6181\_VE\_rc|1  
ACCACATAGAATCGCCATAGGGATCTGCGGCCATGCCTAGATAATCTGGATATTTACATA  
>HPVcand85\_Alpha\_4574720\_nt31\_VE\_rc|1  
TGTAAGCTGGGTTATATATATGCACCGATTTCGGTCATGACCGTTTTTCGGTTACACCCTT  
>HPV16\_Alpha\_9627100\_nt6211\_VE\_rc|1  
TAGTAAAGTCCATAGCACCAAGCCAGTATGAACCATATCACCATCTGAATAACTGTGT  
>HPVFA75/KI88-03\_Unclassified\_206902429\_nt2581\_VE\_rc|1  
CTCCCTCGTCTTCTTGATCACTGAGCTCTAATTGTGTCCAAAGCCTTTCAAGGATTT  
>HPVcand85\_Alpha\_4574720\_nt5581\_VE\_rc|1  
CCTTGCTGTCACTAGAACGCCACAAAGCCATCTGTAAGAAAATAGGGAACACGTTTACGT  
>HPV1\_Mu\_9626063\_nt6001\_VE\_rc|1  
AGCAGCAAAATCCATAGCCCCAAAACCAATATCCATCATGTCAACATCTTCTATGACAGA  
>HPV43\_Alpha\_40804474\_nt6691\_VE\_rc|1  
CCACTGTAACAAACAACACTGATTCCCAAAACAAATGCCATTATTATGTCCCTGGGCCTTTT  
>HPV7\_Alpha\_9627389\_nt31\_VE\_rc|1  
ATCAGGTTTTTTGGGTTGGTTTTTATATGTACCGTTTTTCGGTCGGACCGTTTTTCGGTTAC  
>HPV101\_Unclassified\_109390389\_nt5611\_VE\_rc|1  
CAGCAAAATTCATGGCACCAAGCCAATATCACACATATCCCCATCTGAATAACAGAGG  
>HPV45\_Alpha\_397022\_nt6541\_VE\_rc|1  
CTGATTATGCCAACAATACCATTGTTATGGCCCTGGGCCTTATGTAACCAATATGGCTT  
>HPV5\_Beta\_9627145\_nt4411\_VE\_rc|1  
ATTGTGCACTGTTGTTTGTTCACCTTTATTAATAACATCAGGGGGGCAAGTGCCTGC  
>HPV52\_Alpha\_397038\_nt5191\_VE\_rc|1  
GGACTAATATCATGATAATAATGTACCCGTGCCCAATTTGTTTTCCACTACGTGTACGT  
>HPVcand62\_Alpha\_39932599\_nt6691\_VE\_rc|1  
CAAATACCATTTATTATGGCCCTGCGCCCGCTGCAGCCAATATGGCTTATTAAACAACTGA  
>HPV60\_Gamma\_9628566\_nt2101\_VE\_rc|2  
ACCGTGTAAGTGAAGAACAATATAAGACTTTCCTGTATCTGGAGGTCCCCAAAACACTA  
>HPV67\_Alpha\_3228267\_nt4291\_VE\_rc|1  
GTTCTTTCCACTTTAGGAATAACATCCGGGGGACAGGTGCCTGCCGCCTGCATGTTTGA  
>HPV91\_Alpha\_22023568\_nt6301\_VE\_rc|1  
CCATGGGAGGTGTACAGCCAACAATACATAGCTGTGTTTGTATAATCCATTGCTACGT  
>HPV35\_Alpha\_333050\_nt1231\_VE\_rc|1  
GTGTATTTCACCTTCAGAATTGCCATAACCGCTGTCTGGTAGTTCAAATAATCGTCGCTT  
>HPV34\_Alpha\_9627334\_nt1231\_VE\_rc|1  
CCCGGTACCTGTCTCTCGTACGTTTCCACTTCAGTATTGCCATATCCGCTGTCTTGTTC  
>HPV2\_Alpha\_9626032\_nt5761\_VE\_rc|1  
CCTTGCTTTTCATTAGGCCGCCACAAAGCCATCTGCAAAGAAATAGTGGACACGTTTACGT  
>HPV53\_Alpha\_9627377\_nt5611\_VE\_rc|1  
GCCGCCACACCGCCATCTGCAAGAAAATAGGGAATACGTTTACGACGCTACGTTTCAAA

>HPV33\_Alpha\_333049\_nt1261\_VE\_rc|1  
CTACCTGTTGTACCATCTGCTGAGTTTCCACTTCAGTATTGCCATATCCGCTGTCTTCTA  
>HPV6\_Alpha\_6002612\_nt2731\_VE\_rc|1  
TGTTTTCTTCATAAAGTTCTAACAACCTGTTCTCGGCACGCATCTAAACGCTTGGCTATTG  
>HPV76\_Beta\_2911551\_nt6751\_VE\_rc|1  
GATTTTCCCAACAAATGCCATTGTTATGACCCTGTGCTCGTTGTAGCCAAAAGGGCCTAT  
>HPV8\_Beta\_333074\_nt2641\_VE\_rc|1  
CGCCCTCGTCTTCTTGATCACTCAGCTCTAATTGTGTCCAAAGCCTTGCAAAAAAAGATT  
>HPV50\_Gamma\_9628550\_nt6181\_VE\_rc|1  
ACCTCATTACCCCAACAAATACAATTGTTTCGTACCCCTGAGCTCTGCGAATCCAATATGGT  
>HPV48\_Gamma\_9628542\_nt4501\_VE\_rc|1  
ATACTAATATCTGGATCAAAGGCGGGATTTTCAAACCTCAAACCTGCACCAATCGAGAAGGC  
>HPV32\_Alpha\_9627327\_nt2701\_VE\_rc|1  
TGTTTCCTGGCAGCATCTAAACGTTTGGCCAGTGTCTCCATTTTCTTCTCGTCTCTGA  
>HPV4\_Gamma\_9626597\_nt4651\_VE\_rc|1  
TGTTCTAAATCCCGCTCAAATGTTTGAGTGATGCTCAGCATCAAAGGCGGGATTTTCAAAT  
>HPV26\_Alpha\_9627305\_nt2731\_VE\_rc|1  
AATAGTCTAGTATTTTCTCCTGGCAGCATTTAAACGCTGGCAAAGGTTCTCCATTTTCT  
>HPV36\_Beta\_1020218\_nt4381\_VE\_rc|1  
GTCAGCAACTGTTGTTTGTTCACCTTTATTACACAACATCAGGGGGGCATGTGCCTGCTTG  
>HPV10\_Alpha\_9627257\_nt2401\_VE\_rc|1  
GTTGCATCATCTAACAGTCCTATTTTGGCTTCAGATAATGGCTGCAACCAAAAAATGGCTG  
>HPV41\_Nu\_9626041\_nt6481\_VE\_rc|1  
TTGTTATGGCCCTGGGATCTCTGCAGCCAAAAGGGCCTGTAAACAGCTGCTGCTCAGTA  
>HPV61\_Alpha\_9628574\_nt6661\_VE\_rc|1  
GCCCTGGGCACGTTGCAGCCAATATGGCTTATTAAATAATTGGGAATCAGAGGACACCAT  
>HPV72\_Alpha\_1491683\_nt5761\_VE\_rc|1  
ATACCTTGCCGTCACCAGGCCGCCACAAAGCCATCTGCAAAGAATAGGGCACACGTTTA  
>HPV40\_Alpha\_397014\_nt2611\_VE\_rc|1  
CACAGCATTGCCGTTGCTGTCAAATGGAAATGGATTGGAAATTCAAACACTTGAACCCCT  
>HPV18\_Alpha\_9626069\_nt31\_VE\_rc|1  
TTTCTCACATCTTTTATATACACCGTTTTTCGGTCCCGACCGTTTTTCGGTTACTCCCTTTT  
>HPV101\_Unclassified\_109390389\_nt6151\_VE\_rc|1  
ACACTTTACAGAGCTGCACAATGAGAGAAATTTCAAATTCCTCCACATGTCTGAGGTAGT  
>HPV69\_Alpha\_9670418\_nt2731\_VE\_rc|1  
TCATAATAGTCTAGTATTTTCTCCTGGCAGCATTTAAACGCTGGCAAAGGTTCTCCATT  
>HPV32\_Alpha\_9627327\_nt2731\_VE\_rc|1  
TTACTATCTTCTTCATACAGTTCTAACAACCTGTTCTTGGCAGCATCTAAACGTTTGGCC  
>HPV56\_Alpha\_397053\_nt5791\_VE\_rc|1  
GGAAGCCCAAACCTTATTAGGGTCGGGCAACCGTACCCTAAATACCCTATATTGATATGCA  
>HPV2\_Alpha\_9626032\_nt2701\_VE\_rc|1  
GTTTGTGCTATCCTTTTCATACAGTTCTAGCAACGTCTCCTGGCAGCATCTAAACGGT  
>HPV88\_Gamma\_167600365\_nt6031\_VE\_rc|1  
GGCGAGCATACGACTGCTCACGTTTTTCAAAAAAGAAACATTTATCGCCATAAACATCTT  
>HPV48\_Gamma\_9628542\_nt6151\_VE\_rc|1  
TAATAAACAGCTCATTTCCCAACAAATGCCATTATTTGTTCCCTGGGCTCGTCTAAGCC  
>HPV103\_Unclassified\_109390382\_nt5491\_VE\_rc|1  
ATCACACATATCCCCATCCTCAATAATGGAACCTAACAAGCTCTAAAGGAGGACATGCACC  
>HPV34\_Alpha\_9627334\_nt6421\_VE\_rc|1  
GATTATGCCAGCAAATGCCATTGTTTTGTCCCTGGGCCTTTTGCAACCAATAAGGCTTAT  
>HPV68a\_Alpha\_71726685\_nt6421\_VE\_rc|1  
AAGAAATAATTGATTATGCCAACAATAACCATTTGTGTGTCCTGTGCCTTGTGCAGCCA  
>HPV34\_Alpha\_9627334\_nt5701\_VE\_rc|1  
GGAACCCAAATTTATTGGGATCTGGCAAACGTATTCTAAATACCCTGTATTGCAAACCTG  
>HPV58\_Alpha\_222386\_nt1261\_VE\_rc|1

CTGGTGTGCCATCTGCTCAGTTTCCACTTCAGTATTGCCATATCCGCTGTCTTCTAGCTC  
>HPV68a\_Alpha\_71726685\_nt1741\_VE\_rc|1  
CGTGTGCGCCACACACCTCACTAATATTAGATATTCCTGTTCTATACCAATATAATGCTGC  
>HPV69\_Alpha\_6970418\_nt6121\_VE\_rc|1  
GCAAAGCTGTAAAATCCATGGCACCAAAGCCAGTATCAATCATATCACCATCCTCAATAA  
>HPV31\_Alpha\_333048\_nt2641\_VE\_rc|1  
GTCTCCATCGTTTTCTTTGTCTCTTCTCGTGCAAATTTAATCTGCACCACGTCCTTGA  
>HPV54\_Alpha\_9628437\_nt6511\_VE\_rc|1  
CCAACAAATACCATTTGTTTTGACCCTGGGCCCGTTGTAACCAGTATGGCTTATTAAATAT  
>HPV41\_Nu\_9626041\_nt2281\_VE\_rc|1  
CGTGTCCATCCAAAAATTTGTTAAGACCATTGGCAAATATGATTTGCCTGTGTCCGACG  
>HPV27\_Alpha\_396964\_nt2701\_VE\_rc|1  
ATCTTTTTTCATAAAGTTCTAGCAACGTCTCCTGGCACGCATCTAAACGGTTCGCTAGTGT  
>HPV88\_Gamma\_167600365\_nt2191\_VE\_rc|1  
TCCATATACACCCAACATGGATGTGTTGCATCATCTAGGAAGCCTAATTTAGTATCTTGC  
>HPV35\_Alpha\_333050\_nt5641\_VE\_rc|1  
ATAGCCTAGAACTGCCTGCATGATAGTAGATGTTTGTGCGTGTACATATTCATCAGTGC  
>HPV69\_Alpha\_6970418\_nt6481\_VE\_rc|1  
AAGTAACAAACAATTGGTTGCCCCAACAAATGCCATTATTATGACCCTGGGCACGCTGTA  
>HPV41\_Nu\_9626041\_nt4051\_VE\_rc|1  
TGTGCCACCGCCACCACGTCCTGTGCCAATGCCAGACCGCCAAAGAAAACCCCTACACT  
>HPV41\_Nu\_9626041\_nt6511\_VE\_rc|1  
ACAAAGGCCCTCGTTGTGCCACAGTATGCCATTGTTATGGCCCTGGGATCTCTGCAGCCAA  
>HPV55\_Alpha\_1020266\_nt6601\_VE\_rc|1  
TCCCCCAACAAATACCATTATTGTGGCCCTGCGCCCTTTGCAACCAAAAAAGGCTTATTAA  
>HPV51\_Alpha\_333087\_nt2731\_VE\_rc|1  
TCACTGTCCAGTTCATAACAGTCTAGTATTTTCTCCTGGCACACATTTAAACGGTGGCAT  
>HPV1\_Mu\_9626063\_nt2551\_VE\_rc|1  
GACTGCTGAGGTTTTCCATCGTTTCCCTCGTCTTCTTGGTCACTTAATTCTAACTGTTGC  
>HPV65\_Gamma\_312100\_nt5881\_VE\_rc|1  
ACCAATATCACACATATCCCCATCCTCAATATATGTGTTACAAGCTCTATAGGAGGACA  
>HPV29\_Alpha\_1020210\_nt2731\_VE\_rc|1  
CTCTTTTCATACAGTTCTAGTATTTTGTCTTGGCACGCATCTAAACGGTTCGCTAGGTTCT  
>HPV70\_Alpha\_1173493\_nt6481\_VE\_rc|1  
GTGTCCCTGGGCCTTATGCAACCAATAGGGCTTATTAAACAACCTGGGAATCAGAAGAGAC  
>HPV1\_Mu\_9626063\_nt6361\_VE\_rc|2  
TAACTGGTTTCTCCAGCAAATGCCATTATTCTGGCCTTGACATCGCTGAAGCCAGTAAGA  
>HPV60\_Gamma\_9628566\_nt6331\_VE\_rc|1  
GTTACCCCAACAAATACCATTATTTGCACCTTGGGCTCTGTGAAGCCAATAAGGTCTATT  
>HPV26\_Alpha\_9627305\_nt6511\_VE\_rc|1  
TGATTGCCCCAACAGATACCATTATTATGACCCTGTGCACGTTGTAACCAGTATGGCTTA  
>HPV30\_Alpha\_396973\_nt6571\_VE\_rc|1  
TGCCCCAACAAATGCCATTATTGTGTCCCTGTGCGCGTTGCAACCAGTAAGGTTTATTAA  
>HPV63\_Mu\_9626605\_nt2581\_VE\_rc|1  
GCGGTTGTTGAGGCTTTCCATCACTCTCCTCGTCTTCTTGGTCACTTAAGTCTAACTGGC  
>HPV101\_Unclassified\_109390389\_nt5641\_VE\_rc|1  
GGGGTACCCCTGAGTGATCAGCCTGCAAGGCAGCAAAATTCATGGCACCAAAGCCAATAT  
>HPV42\_Alpha\_333211\_nt2701\_VE\_rc|1  
TCATACAGTTCTAACAACCTGTTCTTGGCACGCATCTAAACGTTTGGCCAGTCTCTCCATA  
>HPV53\_Alpha\_9627377\_nt5641\_VE\_rc|1  
TAGGAGGCAGATAAACCTTGCTGTCACTAGGCCGCCACACCGCCATCTGCAAGAAAATAG  
>HPV61\_Alpha\_9628574\_nt5731\_VE\_rc|1  
GCCGTCACCAGGCCGCCACAAAGCCATCTGAAAAAGAATAGGGTACAGTTTACGACGTT  
>HPVRTRX7\_Unclassified\_30315616\_nt4411\_VE\_rc|1  
AGCAACTGTTGTTTGCTCCACTTTATTAAGAACATCAGGGGGGCAAGTGCCTGCTTGTTT

>HPV67\_Alpha\_3228267\_nt1201\_VE\_rc|1  
GTTTCCACTTCAGTATTGCCATATCCGCTGTCTTCTATGTCTGCTATGCTCTGCGTTTTGCG  
>HPV58\_Alpha\_222386\_nt6571\_VE\_rc|1  
ATAACTGATTGCCCCAGCAAATGCCATTGTTATGACCTTGTGCACGCTGTAGCCAATAAG  
>HPVFA75/KI88-03\_Unclassified\_206902429\_nt2611\_VE\_rc|1  
ATTGAAACGTGCGCTGAGAGTTTCCATCCTCTCCCTCGTCTTCTTGATCACTGAGCTCTA  
>HPV40\_Alpha\_397014\_nt6361\_VE\_rc|1  
ATTGGCCTGCAAGGAAGCAAAATCCATAGCACCAAAGCCAGTATCCACCATGTGCGCCATC  
>HPV52\_Alpha\_397038\_nt5731\_VE\_rc|1  
AATAGGGATGTCCTACTGTTAGTAATCGAGAACTGCCTGCATAATAATAGATGCTTGTGC  
>HPV10\_Alpha\_9627257\_nt2791\_VE\_rc|1  
TGTCGCTATCCTTTTCATATAGTTCTAGCATTTTGTCTGGCACGCATCTAAACGGTTTCG  
>HPV52\_Alpha\_397038\_nt6601\_VE\_rc|1  
CCACAACTGTGACAAACAACTGATTGCCCCAACATATGCCATTATTGTGGCCCTGCGCAC  
>HPV58\_Alpha\_222386\_nt6601\_VE\_rc|1  
TGCTACGAGTGGTATCAACCACGGTAACAAATAACTGATTGCCCCAGCAAATGCCATTGT  
>HPV96\_Beta\_50253426\_nt2761\_VE\_rc|1  
TCCTCCCCCTCGTCTTCTTGGTCACCTAGATCTAACTGCTTCCAAAGCCTTTGAAAAAAA  
>HPV48\_Gamma\_9628542\_nt6421\_VE\_rc|1  
CCGTTGGAGCTGGTGGAAACAAAAGCTAATTGCCACTCCTCTAATATTCTGGGATTCATAA  
>HPV72\_Alpha\_1491683\_nt2731\_VE\_rc|1  
ATCTTTTTTCATAAAGGTCTAGCAATTTCTCCTGGCACGCATCTAAACGGTCGGCTAGTGC  
>HPV91\_Alpha\_22023568\_nt6451\_VE\_rc|1  
TGGCTTGTAAGGATGCAAAATCAAGTGCACCAAACCCTGTATCTACCATATCACCATCCT  
>HPV97\_Alpha\_71726694\_nt2311\_VE\_rc|1  
TGGCTACCTTGGCATCCGCTAACGGTTCTAACCAAAAATGGCTATTTGAATTTACAAATG  
>HPV60\_Gamma\_9628566\_nt5701\_VE\_rc|1  
TGGATGGCCAGAAGTTCCAATTCCTAAAGGCCACCTCTACCAATTTCAAGGCCTTCCAA  
>HPV71\_Alpha\_12084981\_nt2701\_VE\_rc|1  
ATACAGTTCTAGTAACGTCTCCTGGCACGCATCTAAACGGCTGGCCAGTGTCTCCATTGT  
>HPV9\_Beta\_9627396\_nt2641\_VE\_rc|1  
TGAAACGTGCGCTGAGAGTTTCCATCCTCTCCCTCGTCTTCTTGATCACTCAGATCTAAC  
>HPV51\_Alpha\_333087\_nt631\_VE\_rc|1  
TGGTCACGCATATTATCTACTTCATCCTCCTCCTCTGAGCTGTCAAATTGCTCGTAGCAT  
>HPV26\_Alpha\_9627305\_nt6541\_VE\_rc|1  
CGGGTGGTATCAACACAGGTAACAAACAATTGATTGCCCCAACAGATACCATTATTATGA  
>HPV67\_Alpha\_3228267\_nt6541\_VE\_rc|1  
GATTACCCCAGCATATACCATTGTTATGACCTTGTGCGCGTTGTAACCAATATGGTTTAT  
>HPV92\_Beta\_27531786\_nt2521\_VE\_rc|1  
TCGCTGAGAGCCTCCATCCTCACCTCGTCTTCTTGGTCACTTAGATCTAATTGCCTCCA  
>HPV13\_Alpha\_85827580\_nt6661\_VE\_rc|1  
CAGTAACAAACAAGTGATTGCCCCAACATATACCATTATTGTGTCCCTGGGCCTTTTGTA  
>HPV95\_Gamma\_40804520\_nt5461\_VE\_rc|1  
GAAATAAGGATGGCCTACAGTTAAAGTCTTTCTGTTCCAGCGTGGAAGTATAGTGATGT  
>HPV15\_Beta\_396924\_nt2581\_VE\_rc|1  
CCCTCGTCTTCTTGATCACTGAGCTCTAACTGTCTCCAAAGCCTTTCAAAAAAAGATTTT  
>HPV88\_Gamma\_167600365\_nt4591\_VE\_rc|1  
CTTACATCACCAAGTAAAGCGGGATTTTCAAATTCAAATTGAACCGCGCGTGAAGGCCGG  
>HPV36\_Beta\_1020218\_nt2671\_VE\_rc|1  
TCGCTGAGATTCTCCATTTTCGCCCTCGTCTTCTTGGTCACTGAGTTCTAATTGTGTCCA  
>HPV23\_Beta\_1020186\_nt2671\_VE\_rc|1  
CGCTGAGTGCTTCCATCCTCTCCCTCGTCTTCTTGGTCACTGAGTCCCTAATTGTATCCAA  
>HPV21\_Beta\_1020170\_nt2701\_VE\_rc|1  
GATTCTCCATTTTCTCCCTCGTCTTCTTGGTCACTCAGCTCTAATTGATTCCAAAGCCTT  
>HPV88\_Gamma\_167600365\_nt5491\_VE\_rc|1

CAGGCAATTTTCAGCCTAAACACTCGATATTGGCATGCAGACACCTTAGGAATCTCAATTT  
>HPV50\_Gamma\_9628550\_nt5341\_VE\_rc|1  
CCACCATCTTCTATATCATAATATGGGTGTCCACAATTAGTAAACGCTCACTGCGTGCA  
>HPV73\_Alpha\_1491692\_nt4141\_VE\_rc|1  
TACCTTCAACCTTGGGAATTACATCAGGAGGGCACGTACCTGCTTGTTTACATGTTTTAT  
>HPV12\_Beta\_396910\_nt2641\_VE\_rc|1  
TTGGTCACTCAGGTCTAATTGTGTCCAAAGCCTTTCAAAAAAGATTTCCAGCTTTGGTC  
>HPV15\_Beta\_396924\_nt2611\_VE\_rc|1  
TGAAACGTTTCGCTGAGAGTATCCATCGTCTCCCTCGTCTTCTTGATCACTGAGCTCTAAC  
>HPVcand89\_Alpha\_22095322\_nt2641\_VE\_rc|1  
TTGTTGCTATCCTTTTCATAAAGGTCTATTAACCTCTCCTGGCACGCATCTAAACGGTCG  
>HPV73\_Alpha\_1491692\_nt1231\_VE\_rc|1  
TACCTCTGTCTCGTAAGTTTCCACTTCAGTATTGCCATATCCACTGTCTGCTCCTCAAA  
>HPV77\_Alpha\_2911558\_nt4441\_VE\_rc|1  
AGTGCCCTCAACCTTGGGAATAACATCAGGGGGGCATGTGCCTGCTGCTTGCAGGTTTT  
>HPV31\_Alpha\_333048\_nt1231\_VE\_rc|1  
CATCTGCTGCGTTTCCACTTCAGTATTGCCATACCCGCTGTCTGGAAGTTCAAAGAGTCT  
>HPV59\_Alpha\_557236\_nt5161\_VE\_rc|1  
ATCTTCAGCATGTGGTATAGGGCTTATATCATGATAAAAATGTACACGGGCCCCAATTTG  
>HPV56\_Alpha\_397053\_nt6511\_VE\_rc|1  
CCCCAGCAAATGCCATTATTATGGCCTTGGGCACGTTGCAACCAATAAGGTTTATTAAAT  
>HPVTRX7\_Unclassified\_30315616\_nt5941\_VE\_rc|1  
TCATCCGTGCTTTGCACCCTGGCCACTGGTGTTGATGGTGGTAGATAGACCTTACCGTTA  
>HPV11\_Alpha\_333026\_nt2701\_VE\_rc|1  
TCCTGGCACGCATCTAAACGCTTGGCTATTGCTTCCATCTTCTCGTCTCTGAATCCTC  
>HPV24\_Unclassified\_9628486\_nt2611\_VE\_rc|1  
TCTCCATCTCTCCCTCGTCTTCTTGGTCACTGAGGTCTAATTGTCTCCAAAGCCTTTTA  
>HPV81\_Alpha\_40804509\_nt6781\_VE\_rc|1  
AACCAACAAATGCCATTATTATGGCCCTGTGCCCCTGTAGCCAATAAGGCTTATTAAAC  
>HPV7\_Alpha\_9627389\_nt6361\_VE\_rc|1  
AAATCCATGGCACCAAAGCCTGCATCAACCATGTCGCCATCCTCAATAACTTCACTTTTT  
>HPV107\_Beta\_126131393\_nt7351\_VE\_rc|1  
TGGTGTGACTTGTTTCGGTTTAGTCACGAACACGGTTAAAAAATGCTTCACATACCACTT  
>HPV4\_Gamma\_9626597\_nt5461\_VE\_rc|1  
GGTTCCTGTACATCTTTCCTGGAATAAGGATGGCCTACAGTTAAAAGCCTTTCTGTA  
>HPV4\_Gamma\_9626597\_nt4621\_VE\_rc|1  
ATGTCAGCATCAAAGGCGGGATTTTCAAATCCAAATACTATTGCGCGGGAAGGCTGTGTC  
>HPV44\_Alpha\_1020242\_nt6601\_VE\_rc|1  
TTCCCCAACAAATACCATTATTGTGGCCCTGCGCCTTTTGCAACCAAAAAAGGCTTATTAA  
>HPV94\_Alpha\_40804528\_nt2791\_VE\_rc|1  
TGTTGCTATCCTTTTCATAAAGTTCTAGCATTTTGTCTGGCACGCATCTAAACGGTTCG  
>HPV69\_Alpha\_6970418\_nt6451\_VE\_rc|1  
TGCCATTATTATGACCCTGGGCACGCTGTAACCAGTAAGGTTTATTAAACAATTGAGCAT  
>HPV107\_Beta\_126131393\_nt2701\_VE\_rc|1  
TCCCTCGTCTTCTTGGTCACTCAGCTCTAATTGTGTCCAAAGCCTTTCAAAAAAGATTT  
>HPV11\_Alpha\_333026\_nt2731\_VE\_rc|1  
CTGTTTTCTTCATAAAGTTCTAACAACCTGATCCTGGCACGCATCTAAACGCTTGGCTATT  
>HPV50\_Gamma\_9628550\_nt5581\_VE\_rc|1  
GGACCTAAGTAAAAGCTAGGATTTTCTGTGTCTCCAACCTTATTAAACAAGGGATGACCA  
>HPV38\_Beta\_1020234\_nt2611\_VE\_rc|1  
CCATTGTCTCCCTCGTCTTCTTGATCACTGAGCTCTAATTGTGTCCACAGCCTTTTAAAG  
>HPVcand89\_Alpha\_22095322\_nt5731\_VE\_rc|1  
GTATACCTTGCCGTACCAGGCCGCCACAAAGCCATCTGCAAAAGAATAGGGGACACGTT  
>HPV110\_Beta\_186461194\_nt2611\_VE\_rc|1  
TGCAGTGCATTGAAACGATCGCTGAGAGTTCCATCGTCTCCCTCTTCTTCTTGATCACT



>HPV13\_Alpha\_85827580\_nt6631\_VE\_rc|1  
TACCATTATTGTGTCCCTGGGCCTTTTGTAACCAATAAGGTTTATTAAACAACCTGGGCCT  
>HPV70\_Alpha\_1173493\_nt6511\_VE\_rc|1  
CAACTGGTTATGCCAACAAATGCCATTATTGTGTCCCTGGGCCTTATGCAACCAATAGGG  
>HPV111\_Beta\_186461202\_nt2581\_VE\_rc|1  
AGTGCATTGAAACGTTGCTGAGTGTTCATCCTCTCCCTCGTCTTCTTGATCAGAGCT  
>HPV103\_Unclassified\_109390382\_nt5551\_VE\_rc|1  
CAAGGGTACACCTGAATGGTCCTCCTGCAATGTAGCAAAATTCATTGCACCAAAGCCAAT  
>HPV50\_Gamma\_9628550\_nt5551\_VE\_rc|1  
TCTCCAACCTTATTAAACAAGGGATGACCAGTAGATCCAACACCTAAAGGCCACCTCTC  
>HPV59\_Alpha\_557236\_nt2011\_VE\_rc|1  
GCACAATCTTTTAGGTATTTTGCTGGCAGTTGCTTTTAAAAATGCAGCGGCGTTACTA  
>HPV65\_Gamma\_312100\_nt4621\_VE\_rc|1  
CGCTCAAATACTTGAGTGATGTGTCAGCGTCAAAGCGGGATTTTCAAATCCAAAACTATT  
>HPV52\_Alpha\_397038\_nt2041\_VE\_rc|1  
TTTCTGCCCCTTTATAATGTCTACACATGGTTGCACAGTCCTTTACTATTTTGTCTGCG  
>HPV48\_Gamma\_9628542\_nt3391\_VE\_rc|1  
ATAACACTAATGGCGGATCCCGAGCTTCTTCTGTAAATCGTCCAAGTCGTGAGTAACCGT  
>HPV95\_Gamma\_40804520\_nt6121\_VE\_rc|1  
CGCATCACCCATTGTCCCAGCTCTAACAAAAAGTGTCTTGCATAAAGCTGTTCCCTTCG  
>HPV48\_Gamma\_9628542\_nt6121\_VE\_rc|1  
CATTATTTGTTCCCTGGGCTCGTCTAAGCCAATAAGGCCTATTAAATAACTGAGAATCGC  
>HPV12\_Beta\_396910\_nt5881\_VE\_rc|1  
TAGTCCTTTGAATGTATTCATCCGTGCTTTGCACCCTGGCCACTGGTGTGATGGTGGTA  
>HPV57\_Alpha\_60882\_nt2701\_VE\_rc|1  
AAGTTTGTGCTATCTTTTTCATACAGTTCTAGCAACGTCTCCTGGCACGCATCTAAACG  
>HPV43\_Alpha\_40804474\_nt6331\_VE\_rc|1  
GTAGGGAAGCAAAATCCATTGCACCAATCCTGTATCTACCATGTACCATCCTGTATAA  
>HPV82\_Alpha\_6970427\_nt6511\_VE\_rc|1  
CACAAGTAATAAAAAGCTGATTATTCCAGCAAATGCCATTATTGTGGCCCTGGGCGCGAT  
>HPV65\_Gamma\_312100\_nt5431\_VE\_rc|1  
ATCTTTTACTGGAAAATAAGGATGGCCTACAGTTAAAAGCCTTTCTGTTCCAGCGTGGAA  
>HPV82\_Alpha\_6970427\_nt6481\_VE\_rc|1  
AAATGCCATTATTGTGGCCCTGGGCGCGATGCAACCAATAAGGCTTATTAAAAATCTGAG  
>HPV94\_Alpha\_40804528\_nt4441\_VE\_rc|1  
CCAAAGTGGTGCCTTCCACTTTGGGAATAACATCTGGGGGGCATGTGCCTGAGGCTTTGC  
>HPV58\_Alpha\_222386\_nt31\_VE\_rc|1  
AAAAAATGTCTGCTTTATATATGCACCGGTTTCGGTCAGACCGTTTTTCGGTTACACCCTA  
>HPV30\_Alpha\_396973\_nt5641\_VE\_rc|1  
GTGTAGGAGGCAGGTAAACCTTGGTTTCACTAGGCCGCCACACCGCCATCTGCAAGAAAA  
>HPV8\_Beta\_333074\_nt4321\_VE\_rc|1  
CAACTTTATTAATAACATCAGGGGGGCATGTACCTGCCTGTTTGCAGGTTTGATAAATGT  
>HPV54\_Alpha\_9628437\_nt6541\_VE\_rc|1  
ATCTACAACCTGTTAAAAACACCTGATTGCCCAACAATACCATTGTTTGGACCCTGGGC  
>HPV97\_Alpha\_71726694\_nt6421\_VE\_rc|1  
TAATTGATTATGCCAACAAATACCATTGTTATGGCCCTGGGCCCTATGCAACCAATATGG  
>HPV101\_Unclassified\_109390389\_nt1741\_VE\_rc|1  
AGCCCTATTTTCCCATCTACTAGTGGTTGCAACCAAAATTGGCTTCTGCTATTTACAAAC  
>HPV68a\_Alpha\_71726685\_nt6061\_VE\_rc|1  
ACCAAAGTCCATAGCACCATATCCTGTATCAATCATATCGCCATCCTCAATAGGAGTATT  
>HPV1\_Mu\_9626063\_nt4711\_VE\_rc|1  
TAATAGACACCTCATCAAGCTCTGGCTCAAATGCTGGATTATCAAAAAGTGACCATTGACT  
>HPV66\_Alpha\_1020290\_nt6541\_VE\_rc|1  
ATGGCCCTGTGCACGTTGCAACCAATAAGGTTTATTAAATAATTGGGCCCTCAGAGGTAAT  
>HPV68a\_Alpha\_71726685\_nt2221\_VE\_rc|1

GCCTTGTAATAAATGTATAAGGCTCATGCAAAAATATGACTTGCTGTATTTGGCGGCCC  
>HPV101\_Unclassified\_109390389\_nt481\_VE\_rc|1  
CTAGGACTAAAGTACTTTTCGTTTTAGAACTTAAGCTGCTGCGTGTCTCCTCTAGCTGC  
>HPV55\_Alpha\_1020266\_nt1051\_VE\_rc|1  
GCTTAAAGGACTCACATATGGACTACCTAAATACTTTTCGTTTTAGGTCTGCACAGCCGC  
>HPV34\_Alpha\_9627334\_nt6391\_VE\_rc|1  
CCTGGGCCTTTTGCAACCAATAAGGCTTATTAATAATTTGTGCATCTGAGGATACCATAG  
>HPV59\_Alpha\_557236\_nt1261\_VE\_rc|1  
TTCTCCACGGTTACCTGAGTCTCGAGCATTTCCACTTCAGAATAGCCATAGCCGCTGTCT  
>HPV67\_Alpha\_3228267\_nt4261\_VE\_rc|1  
GGACAGGTGCTGCCGCTTGCATGTTTGATATAGTTGTGTTGCAGAGGCACGTTTGCGC  
>HPV77\_Alpha\_2911558\_nt2731\_VE\_rc|1  
TTTCATAGAGTTCTAGCATTTTGTCTCTGGCAGCATCTAAACGGCTCGCTAGGTTCTCCA  
>HPV43\_Alpha\_40804474\_nt31\_VE\_rc|1  
AGCTATGGTTTTTGGGTGGTTTATATATGTACCGCTTTCGGTCGGACCGTTTTTCGGTCCC  
>HPV42\_Alpha\_333211\_nt1951\_VE\_rc|1  
TTTTGCCTGGCAGTTACTTTTTAAATAATGCAGCAGCATTTGCTATCCCTGTCTGCCCCGTTG  
>HPV82\_Alpha\_6970427\_nt631\_VE\_rc|1  
ACGCATATTATCTACTTCATCTCCTCGTCTGAGCTGTCAAATTGCTCGTAGCATTTGCAA  
>HPV44\_Alpha\_1020242\_nt1051\_VE\_rc|1  
TAAAGGACTAACATATGGACTACCTAAATACTTTTCGTTTTAGGTCTGCACAGCCGCATA  
>HPV18\_Alpha\_9626069\_nt5581\_VE\_rc|1  
TATTGTCACTAGGCCGCCACAAAGCCATCTGCAAAAAAATAGGGAACACGTTTACGTTTTC  
>HPV50\_Gamma\_9628550\_nt2491\_VE\_rc|1  
GAAACCGTGCCTCAGAGTTTCTGTGTCTCCATCTGGGTCATCTTCAGGTAAATCTAAG  
>HPV37\_Beta\_1020226\_nt2641\_VE\_rc|1  
GTGCATTGAAACGATCGCTGAGTGTGTCCATCGTCTCCCTCGTCTTCTTGCTCACTGAGA  
>HPV54\_Alpha\_9628437\_nt5581\_VE\_rc|1  
TACTTTGTTTTCGCTAGGCCGCCACATAGCCATCTGCAAGAAAATATGGGAAACGTTTAC  
>HPV91\_Alpha\_22023568\_nt91\_VE\_rc|1  
TGGTTTATATATGTACCGCTTTCGGTCTGACCGTTTTTCGGTTACTCCCTTTAGTACAAGC  
>HPV66\_Alpha\_1020290\_nt6571\_VE\_rc|1  
TACCTGATTACCCAGCATATGCCATTATTATGGCCCTGTGCACGTTGCAACCAATAAGG  
>HPV70\_Alpha\_1173493\_nt6031\_VE\_rc|1  
CTCTCCCATAGCAGGAACACAGCCTATAATACATAACTGTGTTTGCTTATAGTCCACAGA  
>HPV16\_Alpha\_9627100\_nt0081\_Genome\_Tile|1  
TTATGCACCAAAAAGAGAAGTGAATGTTTCAGGACCCACAGGAGCGACCCAGAAAGTTAC  
>HPV16\_Alpha\_9627100\_nt0101\_Genome\_Tile|1  
GCAATGTTTCAGGACCCACAGGAGCGACCCAGAAAGTTACCACAGTTATGCACAGAGCTG  
>HPV16\_Alpha\_9627100\_nt0121\_Genome\_Tile|1  
GGAGCGACCCAGAAAGTTACCACAGTTATGCACAGAGCTGCAACAACCTATACATGATAT  
>HPV16\_Alpha\_9627100\_nt0141\_Genome\_Tile|1  
CACAGTTATGCACAGAGCTGCAACAACCTATACATGATATAATATTAGAATGTGTGTACT  
>HPV16\_Alpha\_9627100\_nt0161\_Genome\_Tile|1  
CAAACAACCTATACATGATATAATATTAGAATGTGTGTACTGCAAGCAACAGTTACTGCGA  
>HPV16\_Alpha\_9627100\_nt0201\_Genome\_Tile|1  
GCAAGCAACAGTTACTGCGACGTGAGGTATATGACTTTGCTTTTCGGGATTTATGCATAG  
>HPV16\_Alpha\_9627100\_nt0241\_Genome\_Tile|1  
TTTTTCGGGATTTATGCATAGTATAGAGATGGGAATCCATATGCTGTATGTGATAAATG  
>HPV16\_Alpha\_9627100\_nt0301\_Genome\_Tile|1  
TTTAAAGTTTTATTCTAAATTAGTGAGTATAGACATTATTGTTATAGTTTGTATGGAAC  
>HPV16\_Alpha\_9627100\_nt0441\_Genome\_Tile|1  
AAGAAAAGCAAAGACATCTGGACAAAAAGCAAAGATTCCATAATATAAGGGGTGCGGTGGA  
>HPV16\_Alpha\_9627100\_nt0461\_Genome\_Tile|1  
GACAAAAAGCAAAGATTCCATAATATAAGGGGTGCGGTGACCGGTGATGTATGTCTTGT

>HPV16\_Alpha\_9627100\_nt0481\_Genome\_Tile|1  
TAATATAAGGGGTCGGTGGACCGGTTCGATGTATGTCTTGTTCAGATCATCAAGAACACG  
>HPV16\_Alpha\_9627100\_nt0741\_Genome\_Tile|1  
GTGTGACTCTACGCTTCGGTTGTGCGTACAAAGCACACACGTAGACATTCGTACTTTGGA  
>HPV16\_Alpha\_9627100\_nt1021\_Genome\_Tile|1  
GTAAATGATAATGATTATTTAACACAGGCAGAAACAGAGACAGCACATGCGTTGTTTACT  
>HPV16\_Alpha\_9627100\_nt1061\_Genome\_Tile|1  
CAGCACATGCGTTGTTTACTGCACAGGAAGCAAAACAACATAGAGATGCAGTACAGGTTT  
>HPV16\_Alpha\_9627100\_nt1101\_Genome\_Tile|1  
TAGAGATGCAGTACAGGTTCTAAAACGAAAGTATTTGGTAGTCCACTTAGTGATATTAGT  
>HPV16\_Alpha\_9627100\_nt1121\_Genome\_Tile|1  
TAAAACGAAAGTATTTGGTAGTCCACTTAGTGATATTAGTGGATGTGTAGACAATAATAT  
>HPV16\_Alpha\_9627100\_nt1281\_Genome\_Tile|1  
GAAACTCAGCAGATGTTACAGGTAGAAGGGCGCCATGAGACTGAAACACCATGTAGTCAG  
>HPV16\_Alpha\_9627100\_nt1301\_Genome\_Tile|1  
GGTAGAAGGGCGCCATGAGACTGAAACACCATGTAGTCAGTATAGTGGTGGAAAGTGGGGG  
>HPV16\_Alpha\_9627100\_nt1381\_Genome\_Tile|1  
GTGGAAGTGGGGGAGAGGGTGTAGTGAAAGACACACTATATGCCAAACACCACTTACAA  
>HPV16\_Alpha\_9627100\_nt1401\_Genome\_Tile|1  
GTTAGTGAAAGACACACTATATGCCAAACCACTTACAAATATTTTAAATGTACTAAAA  
>HPV16\_Alpha\_9627100\_nt1421\_Genome\_Tile|1  
ATGCCAAACCACTTACAAATATTTTAAATGTACTAAAAACTAGTAATGCAAAGGCAGC  
>HPV16\_Alpha\_9627100\_nt1441\_Genome\_Tile|1  
ATATTTTAAATGTACTAAAAACTAGTAATGCAAAGGCAGCAATGTTAGCAAAATTTAAAG  
>HPV16\_Alpha\_9627100\_nt1501\_Genome\_Tile|1  
AGTTATACGGGGTGAGTTTTTTCAGAATTAGTAAGACCATTTAAAAGTAATAAATCAACGT  
>HPV16\_Alpha\_9627100\_nt1561\_Genome\_Tile|1  
GTTGCGATTGGTGTATTGCTGCATTTGGACTTACACCCAGTATAGCTGACAGTATAAAAA  
>HPV16\_Alpha\_9627100\_nt1581\_Genome\_Tile|1  
GCATTTGGACTTACACCCAGTATAGCTGACAGTATAAAAAACACTATTACAACAATATTGT  
>HPV16\_Alpha\_9627100\_nt1601\_Genome\_Tile|1  
TATAGCTGACAGTATAAAAAACACTATTACAACAATATTGTTTATTTTACACATTCAAAG  
>HPV16\_Alpha\_9627100\_nt1741\_Genome\_Tile|1  
TGCTGTCTAAACTATTATGTGTGTCTCCAATGTGTATGATGATAGAGCCTCCAAAATTGC  
>HPV16\_Alpha\_9627100\_nt2181\_Genome\_Tile|1  
AAGCAAATTGTTATGTTTTTAAAGGTATCAAGGTGTAGAGTTTATGTCAATTTTAACTGCA  
>HPV16\_Alpha\_9627100\_nt2201\_Genome\_Tile|1  
AAGGTATCAAGGTGTAGAGTTTATGTCATTTTAACTGCATTAAAAAGATTTTGTCAAGG  
>HPV16\_Alpha\_9627100\_nt2241\_Genome\_Tile|1  
TAAAAAAGATTTTGTCAAGGCATACCTAAAAAAAATTGCATATTACTATATGGTGCAGCT  
>HPV16\_Alpha\_9627100\_nt2321\_Genome\_Tile|1  
TGGTATGAGTTTAAATGAAATTTCTGCAAGGGTCTGTAATATGTTTTGTAAATTCTAAAAG  
>HPV16\_Alpha\_9627100\_nt2521\_Genome\_Tile|1  
CATTGGTACAACATAAATGCCCTCCATTATTAATTACATCTAACATTAATGCTGGTACAG  
>HPV16\_Alpha\_9627100\_nt2541\_Genome\_Tile|1  
CCTCCATTATTAATTACATCTAACATTAATGCTGGTACAGATTCTAGGTGGCCTTATTTA  
>HPV16\_Alpha\_9627100\_nt2821\_Genome\_Tile|1  
AGTACAGACCTACGTGACCATATAGACTATTGGAAACACATGCGCCTAGAATGTGCTATT  
>HPV16\_Alpha\_9627100\_nt2841\_Genome\_Tile|1  
TATAGACTATTGGAAACACATGCGCCTAGAATGTGCTATTATTACAAGGCCAGAGAAAT  
>HPV16\_Alpha\_9627100\_nt2941\_Genome\_Tile|1  
GCTGTATCAAAAGAATAAAGCATTACAAGCAATTGAACTGCAACTAACGTTAGAAACAATA  
>HPV16\_Alpha\_9627100\_nt2961\_Genome\_Tile|1  
ATTACAAGCAATTGAACTGCAACTAACGTTAGAAACAATATATAACTCACAATATAGTAA  
>HPV16\_Alpha\_9627100\_nt2981\_Genome\_Tile|1

AACTAACGTTAGAAACAATATATAACTCACAATATAGTAATGAAAAGTGGACATTACAAG  
>HPV16\_Alpha\_9627100\_nt3001\_Genome\_Tile|1  
TATAACTCACAATATAGTAATGAAAAGTGGACATTACAAGACGTTAGCCTTGAAGTGTAT  
>HPV16\_Alpha\_9627100\_nt3021\_Genome\_Tile|1  
TGAAAAGTGGACATTACAAGACGTTAGCCTTGAAGTGTATTTAACTGCACCAACAGGATG  
>HPV16\_Alpha\_9627100\_nt3081\_Genome\_Tile|1  
TATAAAAAAACATGGATATACAGTGGAAAGTGCAGTTTGATGGAGACATATGCAATACAAT  
>HPV16\_Alpha\_9627100\_nt3181\_Genome\_Tile|1  
GCATCAGTAACTGTGGTAGAGGGTCAAGTTGACTATTATGGTTTATATTATGTTTCATGAA  
>HPV16\_Alpha\_9627100\_nt3201\_Genome\_Tile|1  
GGGTCAAGTTGACTATTATGGTTTATATTATGTTTCATGAAGGAATACGAACATATTTTGT  
>HPV16\_Alpha\_9627100\_nt3341\_Genome\_Tile|1  
CTACATCTGTGTTTAGCAGCAACGAAGTATCCTCTCCTGAAATTATTAGGCAGCACTTGG  
>HPV16\_Alpha\_9627100\_nt3381\_Genome\_Tile|1  
AATTATTAGGCAGCACTTGGCCAACCAACCCCGCCGCGACCCATACCAAAGCCGTCGCCTT  
>HPV16\_Alpha\_9627100\_nt3421\_Genome\_Tile|1  
CATACCAAAGCCGTCGCCTTGGGCACCGAAGAAACACAGACGACTATCCAGCGACCAAGA  
>HPV16\_Alpha\_9627100\_nt3541\_Genome\_Tile|1  
GACAGTGTCTCCAATCCTCACTGCATTTAACAGCTCACACAAAGGACGGATTAACTGTAAT  
>HPV16\_Alpha\_9627100\_nt3561\_Genome\_Tile|1  
TGCATTTAACAGCTCACACAAAGGACGGATTAACTGTAATAGTAACACTACACCCATAGT  
>HPV16\_Alpha\_9627100\_nt3721\_Genome\_Tile|1  
GGACATAATGTAAAACATAAAAGTGCAAATTGTTACACTTACATATGATAGTGAATGGCAA  
>HPV16\_Alpha\_9627100\_nt3741\_Genome\_Tile|1  
AAGTGCAAATTGTTACACTTACATATGATAGTGAATGGCAACGTGACCAATTTTTGTCTCA  
>HPV16\_Alpha\_9627100\_nt3761\_Genome\_Tile|1  
CATATGATAGTGAATGGCAACGTGACCAATTTTTGTCTCAAGTTAAAATACCAAAAATA  
>HPV16\_Alpha\_9627100\_nt3781\_Genome\_Tile|1  
CGTGACCAATTTTTGTCTCAAGTTAAAATACCAAAAATACTATTACAGTGTCTACTGGATTT  
>HPV16\_Alpha\_9627100\_nt3801\_Genome\_Tile|1  
AGTTAAAATACCAAAAATACTATTACAGTGTCTACTGGATTTATGTCTATATGACAAATCTT  
>HPV16\_Alpha\_9627100\_nt3821\_Genome\_Tile|1  
TTACAGTGTCTACTGGATTTATGTCTATATGACAAATCTTGATACTGCATCCACAACATT  
>HPV16\_Alpha\_9627100\_nt3841\_Genome\_Tile|1  
ATGTCTATATGACAAATCTTGATACTGCATCCACAACATTACTGGCGTGCTTTTTGCTTT  
>HPV16\_Alpha\_9627100\_nt3881\_Genome\_Tile|1  
ACTGGCGTGCTTTTTGCTTTGCTTTGTGTGCTTTTGTGTGTCTGCCTATTAATACGTCCG  
>HPV16\_Alpha\_9627100\_nt3901\_Genome\_Tile|1  
GCTTTGTGTGCTTTTGTGTGTCTGCCTATTAATACGTCCGCTGCTTTTGTCTGTGTCTAC  
>HPV16\_Alpha\_9627100\_nt3961\_Genome\_Tile|1  
ATACACATCATTAATAATATTGGTATTACTATTGTGGATAACAGCAGCCTCTGCGTTTAG  
>HPV16\_Alpha\_9627100\_nt3981\_Genome\_Tile|1  
TGGTATTACTATTGTGGATAACAGCAGCCTCTGCGTTTAGGTGTTTATGTATATATTA  
>HPV16\_Alpha\_9627100\_nt4101\_Genome\_Tile|1  
GTATATGTACATAATGTAATTGTTACATATAATTGTTGTATACCATAACTTACTATTTTT  
>HPV16\_Alpha\_9627100\_nt4121\_Genome\_Tile|1  
TGTTACATATAATTGTTGTATACCATAACTTACTATTTTTCTTTTTTATTTTCATATAT  
>HPV16\_Alpha\_9627100\_nt4141\_Genome\_Tile|1  
TACCATAACTTACTATTTTTCTTTTTTATTTTCATATATAATTTTTTTTTTTGTTTGTT  
>HPV16\_Alpha\_9627100\_nt4161\_Genome\_Tile|1  
TCTTTTTTATTTTCATATATAATTTTTTTTTTTGTTTGTGTTTGTGTTTTTAATAAACT  
>HPV16\_Alpha\_9627100\_nt4181\_Genome\_Tile|1  
AATTTTTTTTTTTGTTTGTGTTGTTTGTGTTTTTAATAAACTGTTATTACTTAACAATGCGA  
>HPV16\_Alpha\_9627100\_nt4201\_Genome\_Tile|1  
TGTTTGTGTTTTTAATAAACTGTTATTACTTAACAATGCGACACAAACGTTCTGCAAAACG

>HPV16\_Alpha\_9627100\_nt4341\_Genome\_Tile|1  
TTGAAGGCAAACTATTGCTGAACAAATATTACAATATGGAAGTATGGGTGTATTTTTTG  
>HPV16\_Alpha\_9627100\_nt4461\_Genome\_Tile|1  
GAACAAGGCCTCCCACAGCTACAGATACACTTGCTCCTGTAAGACCCCTTTAACAGTAG  
>HPV16\_Alpha\_9627100\_nt4481\_Genome\_Tile|1  
ACAGATACACTTGCTCCTGTAAGACCCCTTTAACAGTAGATCCTGTGGGCCCTTCTGAT  
>HPV16\_Alpha\_9627100\_nt4561\_Genome\_Tile|1  
GGAAGAACTAGTTTTATTGATGCTGGTGCACCAACATCTGTACCTTCCATTCCCCCAGA  
>HPV16\_Alpha\_9627100\_nt4581\_Genome\_Tile|1  
ATGCTGGTGCACCAACATCTGTACCTTCCATTCCCCCAGATGTATCAGGATTTAGTATTA  
>HPV16\_Alpha\_9627100\_nt4601\_Genome\_Tile|1  
GTACCTTCCATTCCCCCAGATGTATCAGGATTTAGTATTACTACTTCAACTGATACCACA  
>HPV16\_Alpha\_9627100\_nt4621\_Genome\_Tile|1  
TGTATCAGGATTTAGTATTACTACTTCAACTGATACCACACCTGCTATATTAGATATTAA  
>HPV16\_Alpha\_9627100\_nt4641\_Genome\_Tile|1  
CTACTTCAACTGATACCACACCTGCTATATTAGATATTAATAATACTGTTACTACTGTTA  
>HPV16\_Alpha\_9627100\_nt4661\_Genome\_Tile|1  
CCTGCTATATTAGATATTAATAATACTGTTACTACTGTTACTACACATAATAATCCCACT  
>HPV16\_Alpha\_9627100\_nt4841\_Genome\_Tile|1  
GTTAGCACAAACCCTAACACAGTAGTAGCACACCCATACCAGGGTCTCGCCCAGTG  
>HPV16\_Alpha\_9627100\_nt5001\_Genome\_Tile|1  
CATATGAAGGTATAGATGTGGATAATACATTATATTTTTCTAGTAATGATAATAGTATTA  
>HPV16\_Alpha\_9627100\_nt5021\_Genome\_Tile|1  
GATAATACATTATATTTTTCTAGTAATGATAATAGTATTAATATAGCTCCAGATCCTGAC  
>HPV16\_Alpha\_9627100\_nt5201\_Genome\_Tile|1  
AAGGTACATTATTATTATGATTTAAGTACTATTGATCCTGCAGAAGAAATAGAATTACAA  
>HPV16\_Alpha\_9627100\_nt5221\_Genome\_Tile|1  
TTTAAGTACTATTGATCCTGCAGAAGAAATAGAATTACAACTATAACACCTTCTACATA  
>HPV16\_Alpha\_9627100\_nt5241\_Genome\_Tile|1  
CAGAAGAAATAGAATTACAACTATAACACCTTCTACATATACTACCACTTCACATGCAG  
>HPV16\_Alpha\_9627100\_nt5261\_Genome\_Tile|1  
ACTATAACACCTTCTACATATACTACCACTTCACATGCAGCCTCACCTACTTCTATTAAT  
>HPV16\_Alpha\_9627100\_nt5281\_Genome\_Tile|1  
TACTACCACTTCACATGCAGCCTCACCTACTTCTATTAATAATGGATTATATGATATTTA  
>HPV16\_Alpha\_9627100\_nt5301\_Genome\_Tile|1  
CCTCACCTACTTCTATTAATAATGGATTATATGATATTTATGCAGATGACTTTATTACAG  
>HPV16\_Alpha\_9627100\_nt5321\_Genome\_Tile|1  
AATGGATTATATGATATTTATGCAGATGACTTTATTACAGATACTTCTACAACCCCGGTA  
>HPV16\_Alpha\_9627100\_nt5341\_Genome\_Tile|1  
TGCAGATGACTTTATTACAGATACTTCTACAACCCCGGTACCATCTGTACCCTCTACATC  
>HPV16\_Alpha\_9627100\_nt5361\_Genome\_Tile|1  
ATACTTCTACAACCCCGGTACCATCTGTACCCTCTACATCTTTATCAGGTTATATTCCTG  
>HPV16\_Alpha\_9627100\_nt5401\_Genome\_Tile|1  
TTTATCAGGTTATATTCCTGCAAATACAACAATTCCTTTTGGTGGTGCATACAATATTCC  
>HPV16\_Alpha\_9627100\_nt5421\_Genome\_Tile|1  
CAAATACAACAATTCCTTTTGGTGGTGCATACAATATTCCTTTAGTATCAGGTCCTGATA  
>HPV16\_Alpha\_9627100\_nt5461\_Genome\_Tile|1  
TTTAGTATCAGGTCCTGATATACCCATTAATATAACTGACCAAGCTCCTTCATTAATTCC  
>HPV16\_Alpha\_9627100\_nt5481\_Genome\_Tile|1  
TACCCATTAATATAACTGACCAAGCTCCTTCATTAATTCCTATAGTTCCAGGGTCTCCAC  
>HPV16\_Alpha\_9627100\_nt5501\_Genome\_Tile|1  
CAAGCTCCTTCATTAATTCCTATAGTTCCAGGGTCTCCACAATATACAATTATTGCTGAT  
>HPV16\_Alpha\_9627100\_nt6021\_Genome\_Tile|1  
ACAGAAAATGCTAGTGCTTATGCAGCAAATGCAGGTGTGGATAATAGAGAATGTATATCT  
>HPV16\_Alpha\_9627100\_nt6121\_Genome\_Tile|1

AACCACCTATAGGGGAACACTGGGGCAAAGGATCCCCATGTACCAATGTTGCAGTAAATC  
>HPV16\_Alpha\_9627100\_nt6161\_Genome\_Tile|1  
TACCAATGTTGCAGTAAATCCAGGTGATTGTCCACCATTAGAGTTAATAAACACAGTTAT  
>HPV16\_Alpha\_9627100\_nt6421\_Genome\_Tile|1  
ATAGGGCTGGTACTGTTGGTGAAAATGTACCAGACGATTTATACATTAAAGGCTCTGGGT  
>HPV16\_Alpha\_9627100\_nt6461\_Genome\_Tile|1  
ATACATTAAAGGCTCTGGGTCTACTGCAAATTTAGCCAGTTCAAATTATTTTCCTACACC  
>HPV16\_Alpha\_9627100\_nt6641\_Genome\_Tile|1  
TACTACACGCAGTACAAATATGTCATTATGTGCTGCCATATCTACTTCAGAACTACATA  
>HPV16\_Alpha\_9627100\_nt6861\_Genome\_Tile|1  
CCCCCAGGAGGCACACTAGAAGATACTTATAGGTTTGTAAACCAGGCAATTGCTTGTCAA  
>HPV16\_Alpha\_9627100\_nt6881\_Genome\_Tile|1  
AGATACTTATAGGTTTGTAAACCAGGCAATTGCTTGTCAAAAACATACACCTCCAGCACC  
>HPV16\_Alpha\_9627100\_nt6921\_Genome\_Tile|1  
AAACATACACCTCCAGCACCTAAAGAAGATGATCCCCTTAAAAAATACACTTTTTTGGGAA  
>HPV16\_Alpha\_9627100\_nt7021\_Genome\_Tile|1  
TTCCTTTAGGACGCAAATTTTTACTACAAGCAGGATTGAAGGCCAAACCAAATTTACAT  
>HPV16\_Alpha\_9627100\_nt7041\_Genome\_Tile|1  
TTACTACAAGCAGGATTGAAGGCCAAACCAAATTTACATTAGGAAAACGAAAAGCTACA  
>HPV16\_Alpha\_9627100\_nt7061\_Genome\_Tile|1  
GGCCAAACCAAATTTACATTAGGAAAACGAAAAGCTACACCCACCACCTCATCTACCTC  
>HPV16\_Alpha\_9627100\_nt7101\_Genome\_Tile|1  
CCCACCACCTCATCTACCTCTACAACGCTAAACGCAAAAACGTAAGCTGTAAGTATTG  
>HPV16\_Alpha\_9627100\_nt7121\_Genome\_Tile|1  
TACAACGCTAAACGCAAAAACGTAAGCTGTAAGTATTGTATGTATGTTGAATTAGTGT  
>HPV16\_Alpha\_9627100\_nt7141\_Genome\_Tile|1  
AACGTAAGCTGTAAGTATTGTATGTATGTTGAATTAGTGTGTTGTTTGTGTATATGTTT  
>HPV16\_Alpha\_9627100\_nt7161\_Genome\_Tile|1  
TATGTATGTTGAATTAGTGTGTTGTTGTTGTGTATATGTTTGTATGTGCTTGTATGTGCTT  
>HPV16\_Alpha\_9627100\_nt7201\_Genome\_Tile|1  
GTATGTGCTTGTATGTGCTTGTAAATATTAAGTTGTATGTGTGTTTGTATGTATGGTATA  
>HPV16\_Alpha\_9627100\_nt7241\_Genome\_Tile|1  
GTGTTTGTATGTATGGTATAATAAACACGTGTGTATGTGTTTTTAAATGCTTGTGTAAC  
>HPV16\_Alpha\_9627100\_nt7261\_Genome\_Tile|1  
ATAAACACGTGTGTATGTGTTTTTAAATGCTTGTGTAACCTATTGTGTGTCATGCAACATAAA  
>HPV16\_Alpha\_9627100\_nt7281\_Genome\_Tile|1  
TTTTTAAATGCTTGTGTAACCTATTGTGTGTCATGCAACATAAATAAACTTATTGTTTCAACAC  
>HPV16\_Alpha\_9627100\_nt7301\_Genome\_Tile|1  
ATTGTGTGTCATGCAACATAAATAAACTTATTGTTTCAACACCTACTAATTGTGTTGTGGTT  
>HPV16\_Alpha\_9627100\_nt7321\_Genome\_Tile|1  
TAAACTTATTGTTTCAACACCTACTAATTGTGTTGTGGTTATTCATTGTATATAAACTAT  
>HPV16\_Alpha\_9627100\_nt7341\_Genome\_Tile|1  
CTACTAATTGTGTTGTGGTTATTCATTGTATATAAACTATATTTGCTACATCCTGTTTTT  
>HPV16\_Alpha\_9627100\_nt7361\_Genome\_Tile|1  
ATTCATTGTATATAAACTATATTTGCTACATCCTGTTTTTGTGTTTATATATACTATATTT  
>HPV16\_Alpha\_9627100\_nt7461\_Genome\_Tile|1  
TTGCATGCTTTTTGGCACAAAATGTGTTTTTTTAAATAGTTCTATGTCAGCAACTATGGT  
>HPV16\_Alpha\_9627100\_nt7501\_Genome\_Tile|1  
TCTATGTCAGCAACTATGGTTTTAAACTTGTACGTTTCCTGCTTGCCATGCGTGCCAAATC  
>HPV16\_Alpha\_9627100\_nt7541\_Genome\_Tile|1  
CTTGCCATGCGTGCCAAATCCCTGTTTTCTGACCTGCACTGCTTGCCAACCATTCATT  
>HPV16\_Alpha\_9627100\_nt7581\_Genome\_Tile|1  
TGCTTGCCAACCATTCATTGTTTTTTTACACTGCACTATGTGCAACTACTGAATCACTAT  
>HPV16\_Alpha\_9627100\_nt7601\_Genome\_Tile|1  
GTTTTTTTACACTGCACTATGTGCAACTACTGAATCACTATGTACATTGTGTCATATAAAA

>HPV16\_Alpha\_9627100\_nt7621\_Genome\_Tile|1  
TGCAACTACTGAATCACTATGTACATTGTGTCATATAAAATAAATCACTATGCGCCAACG  
>HPV16\_Alpha\_9627100\_nt7641\_Genome\_Tile|1  
GTACATTGTGTCATATAAAATAAATCACTATGCGCCAACGCCTTACATACCGCTGTTAGG  
>HPV16\_Alpha\_9627100\_nt7701\_Genome\_Tile|1  
CACATATTTTTGGCTTGTTTTAACTAACCTAATTGCATATTTGGCATAAGGTTTAACTT  
>HPV16\_Alpha\_9627100\_nt7741\_Genome\_Tile|1  
TTGGCATAAGGTTTAACTTCTAAGGCCAACTAAATGTCACCCTAGTTCATACATGAACT  
>HPV16\_Alpha\_9627100\_nt7761\_Genome\_Tile|1  
CTAAGGCCAACTAAATGTCACCCTAGTTCATACATGAACTGTGTAAAGGTTAGTCATACA  
>HPV16\_Alpha\_9627100\_nt7781\_Genome\_Tile|1  
CCCTAGTTCATACATGAACTGTGTAAAGGTTAGTCATACATTGTTCAATTTGTAAACTGC  
>HPV16\_Alpha\_9627100\_nt7801\_Genome\_Tile|1  
GTGTAAAGGTTAGTCATACATTGTTCAATTTGTAAACTGCACATGGGTGTGTGCAAACCG  
>HPV16\_Alpha\_9627100\_nt7821\_Genome\_Tile|1  
TTGTTCAATTTGTAAACTGCACATGGGTGTGTGCAAACCGATTTTGGGTACACATTTAC  
>HPV16\_Alpha\_9627100\_nt7841\_Genome\_Tile|1  
ACATGGGTGTGTGCAAACCGATTTTGGGTACACATTTACAAGCAACTTATATAATAATA  
>HPV71\_Alpha\_12084981\_nt0001\_Genome\_Tile|1  
TTGTTCTACTTCTTACTCATTATTATAAATTATAATGTTTGTATAAGAAATATAGGTGTA  
>HPV71\_Alpha\_12084981\_nt0021\_Genome\_Tile|1  
TATTATAAATTATAATGTTTGTATAAGAAATATAGGTGTAACCGAAAACGGTGTAAACCGA  
>HPV71\_Alpha\_12084981\_nt0081\_Genome\_Tile|1  
AATGGGTGCATATATAAAGCAATGCTTGGTTCAGCAGATTTAGCTATGTCCAGCGGGGAC  
>HPV71\_Alpha\_12084981\_nt0121\_Genome\_Tile|1  
TAGCTATGTCCAGCGGGGACGCATACCCACCAACCTCTTCAGACTGTGTAAACCAGTACG  
>HPV71\_Alpha\_12084981\_nt0141\_Genome\_Tile|1  
GCATACCCACCAACCTCTTCAGACTGTGTAAACCAGTACGACGTGGACCTGCAGGACCTG  
>HPV71\_Alpha\_12084981\_nt0201\_Genome\_Tile|1  
AACCTAACCTGCATATTCTGCAGAACAATTAACAGACGTGGAAGTCGTGGCCTTGCATAT  
>HPV71\_Alpha\_12084981\_nt0301\_Genome\_Tile|1  
CTGCATGTGCCTGCTGTTTGGAAATAGCTGGAAAATAAGGCAACTTAGATATTGGCAAT  
>HPV71\_Alpha\_12084981\_nt0321\_Genome\_Tile|1  
GAAATAGCTGGAAAATAAGGCAACTTAGATATTGGCAATTTTCAGGCTTTGCAAACACA  
>HPV71\_Alpha\_12084981\_nt0341\_Genome\_Tile|1  
GCAACTTAGATATTGGCAATTTTCAGGCTTTGCAAACACAGTGGAATTAGACACCGGAAC  
>HPV71\_Alpha\_12084981\_nt0361\_Genome\_Tile|1  
TTTTCAGGCTTTGCAAACACAGTGGAATTAGACACCGGAACGCCAGTTACAGAGCAACTAA  
>HPV71\_Alpha\_12084981\_nt0381\_Genome\_Tile|1  
GTGGAATTAGACACCGGAACGCCAGTTACAGAGCAACTAATACGGTGCTACGTGTGTAC  
>HPV71\_Alpha\_12084981\_nt0401\_Genome\_Tile|1  
GCCAGTTACAGAGCAACTAATACGGTGCTACGTGTGTACAAAGCCATTGTGTAGTGTGGA  
>HPV71\_Alpha\_12084981\_nt0421\_Genome\_Tile|1  
TACGGTGCTACGTGTGTACAAAGCCATTGTGTAGTGTGAAAAAGAAAGAATAATTACAG  
>HPV71\_Alpha\_12084981\_nt0441\_Genome\_Tile|1  
AAGCCATTGTGTAGTGTGAAAAAGAAAGAATAATTACAGAAGGCAGGCGATTTTCATAAA  
>HPV71\_Alpha\_12084981\_nt0541\_Genome\_Tile|1  
AACCATGCGAGGCCAACAATGTACCTTAAAGACATTGTCCTGCAGCTACAGCCAGAGGTT  
>HPV71\_Alpha\_12084981\_nt0861\_Genome\_Tile|1  
GATGATGATGGGGGCGAAGCGGGAACAGGCGGGGAGGGTGGTTTTTTGTAGAAGCTATT  
>HPV71\_Alpha\_12084981\_nt0901\_Genome\_Tile|1  
GGTTTTTTGTAGAAGCTATTGTGGACAGATGTACCGGCCACAGCCATCCAGTGATGAGG  
>HPV71\_Alpha\_12084981\_nt1141\_Genome\_Tile|1  
TAGACAAAGAGTTAAGCCGCGGCTAGATGCTATATCCATAGGCAGGGAATCCCCAAAAG  
>HPV71\_Alpha\_12084981\_nt1261\_Genome\_Tile|1

AAGCGGCAGGAAACCAGGTACCAAGGGACGGGACGCCAGGGGGGCTGCACACAGAACAGG  
>HPV71\_Alpha\_12084981\_nt1601\_Genome\_Tile|1  
CATACAACAACAAACATGTTCCCTGGGGAGTGTTATATTAATGCTGTTGCGATATAAGTG  
>HPV71\_Alpha\_12084981\_nt2081\_Genome\_Tile|1  
ACAATGGATATCATTTAGAGTGTCAAATAACAGAAGAAGGGGATTGGCGAACAATAGT  
>HPV71\_Alpha\_12084981\_nt2101\_Genome\_Tile|1  
GTGCTAAAATAACAGAAGAAGGGGATTGGCGAACAATAGTAAAATATTTAAGACACCAGG  
>HPV71\_Alpha\_12084981\_nt2261\_Genome\_Tile|1  
ATCCTATTTTTGCATGAGCCTATTACGGTTTTTGGGTGGGGTTGTCATTTCCCTATGCCAA  
>HPV71\_Alpha\_12084981\_nt2361\_Genome\_Tile|1  
AAATTAGGACTAATAGATGATGTAACCCCTAATTGCTGGAGCTATATAGATGTATATCTA  
>HPV71\_Alpha\_12084981\_nt2441\_Genome\_Tile|1  
TCAAATATGTATAGATAGAAAACACAGGCCATTACTGCAGTTAAAGTGTCCCCCATTGTT  
>HPV71\_Alpha\_12084981\_nt2901\_Genome\_Tile|1  
AGCCAAAGCTTGTAAGCAATTGAAATTCAGTTGGCATTAAAGACATTACTTAACAGTCC  
>HPV71\_Alpha\_12084981\_nt3021\_Genome\_Tile|1  
TAAGCAATGCTGGAAAAAAAAGGCTACACTGTAGAAGTGCATACGATTGCAAAGAGGA  
>HPV71\_Alpha\_12084981\_nt3041\_Genome\_Tile|1  
AAGGCTACACTGTAGAAGTGCATACGATTGCAAAGAGGAAAAGACAATGTGTTACACAT  
>HPV71\_Alpha\_12084981\_nt3061\_Genome\_Tile|1  
CGATACGATTGCAAAGAGGAAAAGACAATGTGTTACACATGTTGGAGGGAAATATATGTG  
>HPV71\_Alpha\_12084981\_nt3081\_Genome\_Tile|1  
AAAGACAATGTGTTACACATGTTGGAGGGAAAATATATGTGCAAAACAGTACAAATGAGAC  
>HPV71\_Alpha\_12084981\_nt3121\_Genome\_Tile|1  
CAAAACAGTACAAATGAGACATGGGAAAAAGTGTGTGGCCTGGTGGACCATGCGGGCATA  
>HPV71\_Alpha\_12084981\_nt3141\_Genome\_Tile|1  
ATGGGAAAAAGTGTGTGGCCTGGTGGACCATGCGGGCATATACTATTTACACGATGGGAT  
>HPV71\_Alpha\_12084981\_nt3161\_Genome\_Tile|1  
TGGTGGACCATGCGGGCATATACTATTTACACGATGGGATACGTGTAGACTGTGTATTAT  
>HPV71\_Alpha\_12084981\_nt3181\_Genome\_Tile|1  
TACTATTTACACGATGGGATACGTGTAGACTGTGTATTATTCTCCAAGGAAGCAGTAATA  
>HPV71\_Alpha\_12084981\_nt3201\_Genome\_Tile|1  
ACGTGTAGACTGTGTATTATTCTCCAAGGAAGCAGTAATATATGGGGACACAGGCATCTG  
>HPV71\_Alpha\_12084981\_nt3341\_Genome\_Tile|1  
AAGTACCCACTATTAAACCTACTGACCACGGACCCGACTCGCACCCCCAACAGGCCTCCA  
>HPV71\_Alpha\_12084981\_nt3701\_Genome\_Tile|1  
CGTGGCATTGGGCCACTGGCACAGAGGACAATACATGTAAACAACATTTGTAACATTGT  
>HPV71\_Alpha\_12084981\_nt3761\_Genome\_Tile|1  
GGCATGATAGTGTGGAACAGCGGGCACAATTTCTAGCCACTGTACATATTCCTAAGGGCA  
>HPV71\_Alpha\_12084981\_nt3801\_Genome\_Tile|1  
TGTACATATTCCTAAGGGCATAGAGGCCTTACCAGGATATATGTCATTGTTGCATAATC  
>HPV71\_Alpha\_12084981\_nt3821\_Genome\_Tile|1  
TAGAGGCCTTACCAGGATATATGTCATTGTTTGCATAATCTTTGTAAATATTGTATATAT  
>HPV71\_Alpha\_12084981\_nt3901\_Genome\_Tile|1  
GGAACGTTAAGGGTACACACCTACCTGTAGTGCTGGAGCCCTTTCTATGCTGGGTGTCTG  
>HPV71\_Alpha\_12084981\_nt3941\_Genome\_Tile|1  
CTTTCTATGCTGGGTGTCTGCATGGACCTATGCACTACTACTACTAATTAGCTTTTGGCT  
>HPV71\_Alpha\_12084981\_nt3961\_Genome\_Tile|1  
CATGGACCTATGCACTACTACTAATTAGCTTTTGGCTGTCTATTTTATCTTCTCTTA  
>HPV71\_Alpha\_12084981\_nt3981\_Genome\_Tile|1  
CTACTAATTAGCTTTTGGCTGTCTATTTTATCTTCTCTTACTGCCTTTTAAATTTTTTTT  
>HPV71\_Alpha\_12084981\_nt4001\_Genome\_Tile|1  
GTCTATTTTATCTTCTCTTACTGCCTTTTAAATTTTTTTTGTACTGTGTTTCTTGGGTT  
>HPV71\_Alpha\_12084981\_nt4021\_Genome\_Tile|1  
CTGCCTTTTAAATTTTTTTTGTACTGTGTTTCTTGGGTTTCTAGCACTATATATACAGG



>HPV71\_Alpha\_12084981\_nt4061\_Genome\_Tile|1  
TCTAGCACTATATATACAGGCAGCAGCGTCCCTTACCTAACTGTGACTTGTGACTACCAC  
>HPV71\_Alpha\_12084981\_nt4121\_Genome\_Tile|1  
ACAACCAGCCAATACTGCTACTACGTGTACATAACCTATCCATTTGTGTTATAGATTGCA  
>HPV71\_Alpha\_12084981\_nt4141\_Genome\_Tile|1  
CTACGTGTACATAACCTATCCATTTGTGTTATAGATTGCATATATGTATCCTGTTGTGGT  
>HPV71\_Alpha\_12084981\_nt4181\_Genome\_Tile|1  
TATATGTATCCTGTTGTGGTAAAGGATTCCCAAGGCGGACATTATGATATTGTGGTGTGG  
>HPV71\_Alpha\_12084981\_nt4221\_Genome\_Tile|1  
ATTATGATATTGTGGTGTGGGGCCCTGATGATGTAGATGTATTGTTTGTGTTTTTAGTGT  
>HPV71\_Alpha\_12084981\_nt4241\_Genome\_Tile|1  
GGCCCTGATGATGTAGATGTATTGTTTGTGTTTTTAGTGTGGTGTGTCTTATGTTGCTT  
>HPV71\_Alpha\_12084981\_nt4261\_Genome\_Tile|1  
ATTGTTTGTGTTTTTAGTGTGGTGTGTCTTATGTTGCTTCTGTTTTTGTACGGTTGAT  
>HPV71\_Alpha\_12084981\_nt4281\_Genome\_Tile|1  
TGGTGTGTCTTATGTTGCTTCTGTTTTTGTACGGTTGATGCAGTAGGTACCCCCCTTT  
>HPV71\_Alpha\_12084981\_nt4301\_Genome\_Tile|1  
CTGTTTTTGTACGGTTGATGCAGTAGGTACCCCCCTTTTGTATTGCCCTGTTTATACA  
>HPV71\_Alpha\_12084981\_nt4381\_Genome\_Tile|1  
TTATTTGGTTTTTGTTTTTTGTTTTTTGTGTGTGCCTGTGTGTGTAAATAAACACATTTA  
>HPV71\_Alpha\_12084981\_nt4781\_Genome\_Tile|1  
AGCAGGAGCACCATATCCTAACTTTACTGGCACAGGTGGGTTTGAGGTCACACAGCATC  
>HPV71\_Alpha\_12084981\_nt4861\_Genome\_Tile|1  
TAGACATTACTCCAGGTAACACTGTGCAGGTTAGTAGCAGTAGTTTTACTAACCCATCCT  
>HPV71\_Alpha\_12084981\_nt4921\_Genome\_Tile|1  
TTACTGAACCTGCCTTAGTGGAGCCCCCTCAAACAGGTGAGGTTTCGGGACATATTTTGG  
>HPV71\_Alpha\_12084981\_nt5141\_Genome\_Tile|1  
GGTGGATGAATCCACATTTCTTCGCCACCTGCATCTATGGTTACATATGACAACCCTGT  
>HPV71\_Alpha\_12084981\_nt5281\_Genome\_Tile|1  
CCTTGACAGGCCGGCCCTTACTGCCCCGTAAAGGTACGGTACGTTTCAGTCGTTTAGGAC  
>HPV71\_Alpha\_12084981\_nt5401\_Genome\_Tile|1  
ATGACATTAGCCCTATACAACCCACCGAACACTTAGAACTGCAGCCACTAGGGCGGGCCT  
>HPV71\_Alpha\_12084981\_nt5421\_Genome\_Tile|1  
CCCACCGAACACTTAGAACTGCAGCCACTAGGGCGGGCCTTACAACAAGAACCTATTGAC  
>HPV71\_Alpha\_12084981\_nt5441\_Genome\_Tile|1  
GCAGCCACTAGGGCGGGCCTTACAACAAGAACCTATTGACACATTATATGACATATATCT  
>HPV71\_Alpha\_12084981\_nt5481\_Genome\_Tile|1  
ACATTATATGACATATATCTGACACAGATTATTCCAATGATACTGTCAATCAACCTACTT  
>HPV71\_Alpha\_12084981\_nt5501\_Genome\_Tile|1  
GACACAGATTATTCCAATGATACTGTCAATCAACCTACTTCTGTGTCCAGCAGGCCTACA  
>HPV71\_Alpha\_12084981\_nt5521\_Genome\_Tile|1  
TACTGTCAATCAACCTACTTCTGTGTCCAGCAGGCCTACACCTACTACTATACCCCTCTG  
>HPV71\_Alpha\_12084981\_nt5561\_Genome\_Tile|1  
CCTACTACTATACCCCTCTGTAACCTGCCACATCAGCCGTGTCTGCCTCTCGCACACAAAA  
>HPV71\_Alpha\_12084981\_nt5601\_Genome\_Tile|1  
TCTGCCTCTCGCACACAAAATGTTACAGCACCTTTGTCTGCAGGAGCAGATGTTCCAGTG  
>HPV71\_Alpha\_12084981\_nt5621\_Genome\_Tile|1  
TGTTACAGCACCTTTGTCTGCAGGAGCAGATGTTCCAGTGTTTGATGGCCCTGACATTGA  
>HPV71\_Alpha\_12084981\_nt5681\_Genome\_Tile|1  
TTTTTCCACCTCCCATGCCACTACTCCTACTCCTGTAGTGCCGTCCATTGCACCTCCCAG  
>HPV71\_Alpha\_12084981\_nt7421\_Genome\_Tile|1  
ATGTATATGTGTTTGTGTGTATATTGTATGTTGTTGTGTACGTGTGTATATACTGTGCG  
>HPV71\_Alpha\_12084981\_nt7501\_Genome\_Tile|1  
CATGTTTGTGTTGTTAATAAATGCGTGTATGTATGTGTGTTATTTGGTTGCACCCCTGT  
>HPV71\_Alpha\_12084981\_nt7561\_Genome\_Tile|1

GAGTAAGTGTGCAAGCAGATATAACCCCCCTGTCCGGTGACGCCTTACTGACCAGTGAC  
>HPV71\_Alpha\_12084981\_nt7721\_Genome\_Tile|1  
TACTATACAATGGGTAATCCTTGTATTGCTTCATATCCTTTCCAACACAGGTGTGCATAC  
>HPV71\_Alpha\_12084981\_nt7741\_Genome\_Tile|1  
TTGTATTGCTTCATATCCTTTCCAACACAGGTGTGCATACCATCATAAGGTGTGCCTGGC  
>HPV71\_Alpha\_12084981\_nt7801\_Genome\_Tile|1  
AGTTATTTGGCACACTATAAATGCATGTTATAATTAACCTTTAATACATGTGTTACTCACC  
>HPV71\_Alpha\_12084981\_nt7821\_Genome\_Tile|1  
ATGCATGTTATAATTAACCTTTAATACATGTGTTACTCACCGTGCAATACCCATTGTTTGG  
>HPV71\_Alpha\_12084981\_nt7841\_Genome\_Tile|1  
TAATACATGTGTTACTCACCGTGCAATACCCATTGTTTGGGGCATATAGTTGTGCTGACT  
>HPV71\_Alpha\_12084981\_nt7861\_Genome\_Tile|1  
GTGCAATACCCATTGTTTGGGGCATATAGTTGTGCTGACTATGTTTCGCCTAAGTACGTTT  
>HPV71\_Alpha\_12084981\_nt7921\_Genome\_Tile|1  
TTGGCAACAGCAGTGTAGTTTCTGTCCAAGAATGTGTCTGCTAACTTTTATAATGTACTT  
>HPV71\_Alpha\_12084981\_nt7941\_Genome\_Tile|1  
TCTGTCCAAGAATGTGTCTGCTAACTTTTATAATGTACTTAGCAACATGGTTTATACACA  
>HPV61\_Alpha\_9628574\_nt0061\_Genome\_Tile|1  
ATATATAAAGAAACCGTAGGGTCAGCAAAGCACACTCATCTATGGGACCGTGCAATCCAA  
>HPV61\_Alpha\_9628574\_nt0421\_Genome\_Tile|1  
TAAGTATACAGGAAAAGGAGCATCAGGTACAGGCATACATCCACTTCCACTATATAGCTG  
>HPV61\_Alpha\_9628574\_nt1321\_Genome\_Tile|1  
GGGGGGGACGGAGAGGCCGAGGCCACAGGTAACCAGGAAACGCAAGCGCAGGAGCAGGCG  
>HPV61\_Alpha\_9628574\_nt1361\_Genome\_Tile|1  
CGCAAGCGCAGGAGCAGGCGGCAGACATATTAGAGGTGTTTAAGGTTAGTAATTTAAAAG  
>HPV61\_Alpha\_9628574\_nt1381\_Genome\_Tile|1  
GCAGACATATTAGAGGTGTTTAAGGTTAGTAATTTAAAAGCAAAATTACTGTACAAATTC  
>HPV61\_Alpha\_9628574\_nt2521\_Genome\_Tile|1  
GAGGATCCTACGTTTAAATACCTGCACAGTAGAATAGTGGTGTTCAGTTTTTACATAAG  
>HPV61\_Alpha\_9628574\_nt2561\_Genome\_Tile|1  
TGTTTTAGTTTTTACATAAGTGTCCACTAAACAGTAATGGGGACCCAGTATATACCCTGA  
>HPV61\_Alpha\_9628574\_nt3081\_Genome\_Tile|1  
AGGACCACAAAGCAGTGAATACGTTAGTTGGGGGTATATTTATGTACAAAGCACAGAAA  
>HPV61\_Alpha\_9628574\_nt3101\_Genome\_Tile|1  
TACGTTAGTTGGGGGTATATTTATGTACAAAGCACAGAACTGATCTGTGGTATAAGGTT  
>HPV61\_Alpha\_9628574\_nt3141\_Genome\_Tile|1  
CTGATCTGTGGTATAAGGTTCTTGGAAAAGTGTCATATAAGGGCCTATATTATGAAATGG  
>HPV61\_Alpha\_9628574\_nt3161\_Genome\_Tile|1  
CCTGGAAAAGTGTCATATAAGGGCCTATATTATGAAATGGAGGGACAGGAACACTATTAT  
>HPV61\_Alpha\_9628574\_nt3181\_Genome\_Tile|1  
GGGCCTATATTATGAAATGGAGGGACAGGAACACTATTATGTGACATTTGCACAGGAGGC  
>HPV61\_Alpha\_9628574\_nt3761\_Genome\_Tile|1  
GTTAATGTGGAACAACGAAAACAATTTTAAATCGTGTAAACCATTCCAAAGGGTATACAA  
>HPV61\_Alpha\_9628574\_nt3901\_Genome\_Tile|1  
GCTACAGCTATTTACATACCACACCTGCATTATTGTGTAAACCATAAACAATCCTGGACG  
>HPV61\_Alpha\_9628574\_nt4041\_Genome\_Tile|1  
AGCGCATTTTTGGTGTTTTTCTGTGCCATATATGTAGGATTGTTGTGCATATACATGCAA  
>HPV61\_Alpha\_9628574\_nt4141\_Genome\_Tile|1  
ACACTGCTGCTCATATGTAAATAGTGTTCCCTTGTGTCTGTTGTTTCGTTTGCAATATGTAT  
>HPV61\_Alpha\_9628574\_nt4161\_Genome\_Tile|1  
ATAGTGTTCCTTGTGTCTGTTGTTTCGTTTGCAATATGTATCCCCTTGTAGTTAGTTCCCC  
>HPV61\_Alpha\_9628574\_nt4181\_Genome\_Tile|1  
TGTTTCGTTTGCAATATGTATCCCCTTGTAGTTAGTTCCCCTCAGGGGTTTGCATTACTGG  
>HPV61\_Alpha\_9628574\_nt4201\_Genome\_Tile|1  
CCCCTTGTAGTTAGTTCCCCTCAGGGGTTTGCATTACTGGTTGTGGATCAGCAAACTGC

>HPV61\_Alpha\_9628574\_nt4221\_Genome\_Tile|1  
TCAGGGGTTTGCATTACTGGTTGTGGATCAGCAAACTGCGGATTGTTATTTTTGTTTTT  
>HPV61\_Alpha\_9628574\_nt4241\_Genome\_Tile|1  
TTGTGGATCAGCAAACTGCGGATTGTTATTTTTGTTTTTGCTATTACTGCTTATTGCAA  
>HPV61\_Alpha\_9628574\_nt4261\_Genome\_Tile|1  
GGATTGTTATTTTTGTTTTTGTCTATTACTGCTTATTGCAATACTGTTGTACAGGCTTTTA  
>HPV61\_Alpha\_9628574\_nt4281\_Genome\_Tile|1  
GCTATTACTGCTTATTGCAATACTGTTGTACAGGCTTTTACATTAGGTGGTGTACCTTGT  
>HPV61\_Alpha\_9628574\_nt4321\_Genome\_Tile|1  
CATTAGGTGGTGTACCTTGTGTGTTTTCCCTCCCCACAGTTTTTTACTTTGTTATATTTT  
>HPV61\_Alpha\_9628574\_nt4361\_Genome\_Tile|1  
TTTTTACTTTGTTATATTTTTTATATGTTTATGGCCTAATAAACATTATGGCTCTTAAACG  
>HPV61\_Alpha\_9628574\_nt4681\_Genome\_Tile|1  
ATCCAGTGGGTGCTGCCGATCCCTCTATAGTTACCCTTGTAGAGGAATCCAGCGTCATTG  
>HPV61\_Alpha\_9628574\_nt4761\_Genome\_Tile|1  
ACATTTTCCGGGTCCGGGGGCTTCAATGTCACGTCGTCTTCTACTACCACCCCGGCTGTG  
>HPV61\_Alpha\_9628574\_nt4781\_Genome\_Tile|1  
CTTCAATGTCACGTCGTCTTCTACTACCACCCCGGCTGTGTTGGACATTACTCCATCGGG  
>HPV61\_Alpha\_9628574\_nt4981\_Genome\_Tile|1  
AAATCCCAATGCACACCTTTGCTACCTCTGAGGGTCCTGGAAGTAGTACCCCGCTGCCTG  
>HPV61\_Alpha\_9628574\_nt5081\_Genome\_Tile|1  
TAAGGCTAACCAACAAATTAAGGTTGCTAACCTACATTTATGTCTGATCCAGCCTCCTT  
>HPV61\_Alpha\_9628574\_nt5381\_Genome\_Tile|1  
ATCGGATGCTGTGGAGTTACAGCCTTTGGTGCCGTCCTCGTCCCTAGTATAACATATGA  
>HPV61\_Alpha\_9628574\_nt5421\_Genome\_Tile|1  
TCCCTTAGTATAACATATGATATATATGCTGACCCTGAGGTGTTGGATCTTCCTGCACAA  
>HPV61\_Alpha\_9628574\_nt5441\_Genome\_Tile|1  
TATATATGCTGACCCTGAGGTGTTGGATCTTCCTGCACAACATACACAACCCACACTTAC  
>HPV61\_Alpha\_9628574\_nt5461\_Genome\_Tile|1  
TGTTGGATCTTCCTGCACAACATACACAACCCACACTTACAGTACAGGGCCCTTCCCTCT  
>HPV61\_Alpha\_9628574\_nt5481\_Genome\_Tile|1  
CATACACAACCCACACTTACAGTACAGGGCCCTTCCCTCTCTGCTGCATCTGCATCTACC  
>HPV61\_Alpha\_9628574\_nt5501\_Genome\_Tile|1  
AGTACAGGGCCCTTCCCTCTCTGCTGCATCTGCATCTACCAAGGTACACAATGTCACTGT  
>HPV61\_Alpha\_9628574\_nt5561\_Genome\_Tile|1  
TCCACTGGCCACAGGGCTTGATACGCCTGTGACATCTGGCCCTGATGTTGATTTTGCACA  
>HPV61\_Alpha\_9628574\_nt5881\_Genome\_Tile|1  
TCCCGTCTGCTTACTGTAGGACATCCCTATTGTAGTTTGCAGCTTGATGGGCTGCAGGGC  
>HPV61\_Alpha\_9628574\_nt5901\_Genome\_Tile|1  
ACATCCCTATTGTAGTTTGCAGCTTGATGGGCTGCAGGGCAAGAAAAACACTATCCCCAA  
>HPV61\_Alpha\_9628574\_nt6281\_Genome\_Tile|1  
GTACTGCTTGTGCTAACCCCGCGCCCCGGCCCACTGACTGTCTCCATTGGAATTTACAA  
>HPV61\_Alpha\_9628574\_nt6781\_Genome\_Tile|1  
AGTACTAATTTAACCATTTGTACTGCTACATCCCCCCTGTATCTGAATATAAAGCCACA  
>HPV61\_Alpha\_9628574\_nt6801\_Genome\_Tile|1  
TACTGCTACATCCCCCCTGTATCTGAATATAAAGCCACAAGCTTTAGGGAATATTTGCG  
>HPV61\_Alpha\_9628574\_nt6981\_Genome\_Tile|1  
TGTGGTACCACCACCCTCTACCAGTTTAGAAGACACATATAGGTTTTTGCAGTCCAGAGC  
>HPV61\_Alpha\_9628574\_nt7261\_Genome\_Tile|1  
CGCAAAAAGCGTAAACAGTAGTGATGTTTGTCTGTATGCTGTTGTTGTGCATGTGTTGTT  
>HPV61\_Alpha\_9628574\_nt7321\_Genome\_Tile|1  
TTGTATTGTGCTGTACTGGCCTTGTGCATGTGCTGTTTGTATGGTGCCTGGTTTGTATGA  
>HPV61\_Alpha\_9628574\_nt7361\_Genome\_Tile|1  
ATGGTGCCTGGTTTGTATGACTGTATTTGCTATGGTTGTGTATTGTGTGACCCTGTACTG  
>HPV61\_Alpha\_9628574\_nt7381\_Genome\_Tile|1

CTGTATTTGCTATGGTTGTGTATTGTGTGACCCTGTACTGACCCTTGTCCCCTGTGTTGT  
>HPV61\_Alpha\_9628574\_nt7401\_Genome\_Tile|1  
TATTGTGTGACCCTGTACTGACCCTTGTCCCCTGTGTTGTGTATCTGTGGAATGTGTGTT  
>HPV61\_Alpha\_9628574\_nt7521\_Genome\_Tile|1  
GAGTAAGTGTGTTTATTGTTGCACGCCTTATTTTGTGCAGCTTCCCCATTTCTGTGTTCC  
>HPV61\_Alpha\_9628574\_nt7661\_Genome\_Tile|1  
GCCTTTTTGGTTGTGGCACTATGCCACTGTACACATACCACATCCTGTTTAAACAAACTT  
>HPV61\_Alpha\_9628574\_nt7681\_Genome\_Tile|1  
ATGCCACTGTACACATACCACATCCTGTTTAAACAAACTTTATGTGTTGCACCTGGGTGT  
>HPV61\_Alpha\_9628574\_nt7701\_Genome\_Tile|1  
CATCCTGTTTAAACAAACTTTATGTGTTGCACCTGGGTGTGTTTGACAGGTTGCTAACAC  
>HPV61\_Alpha\_9628574\_nt7741\_Genome\_Tile|1  
GTTTGACAGGTTGCTAACACACACAGTTTGGAAACAATGCTCCATCTATCTTTTTTGACAT  
>HPV61\_Alpha\_9628574\_nt7761\_Genome\_Tile|1  
ACACAGTTTGGAAACAATGCTCCATCTATCTTTTTTGACATGTTGTGCAATTACTGTGCTT  
>HPV61\_Alpha\_9628574\_nt7841\_Genome\_Tile|1  
GACTACTTTCCTTAATTGCTGGTTTGGCATTGCTTGTATACTTTTCTAGCCAGGAAACT  
>HPV61\_Alpha\_9628574\_nt7861\_Genome\_Tile|1  
TGGTTTGGCATTGCTTGTATACTTTTCTAGCCAGGAACTGTCTTGCAACTTTGGGCATG  
>HPV61\_Alpha\_9628574\_nt7881\_Genome\_Tile|1  
ACTTTTCTAGCCAGGAAACTGTCTTGCAACTTTGGGCATGTTTTACACACATTATGTTAC  
>HPV7\_Alpha\_9627389\_nt0281\_Genome\_Tile|1  
TGCAGCGTGTGTAAAGTGTTTAGAATTTTATGGAAAAGTGAATCAGTATAGGAACTTTAG  
>HPV7\_Alpha\_9627389\_nt0721\_Genome\_Tile|1  
TAAATAGTAACACATTGTGTATTTTGTCACTGTTTAGTTCGCCTAGTAGTCCATTGTAC  
>HPV7\_Alpha\_9627389\_nt0741\_Genome\_Tile|1  
TATTTTGTCACTGTTTAGTTCGCCTAGTAGTCCATTGTACTGCTACTGATATAAGGCAGG  
>HPV7\_Alpha\_9627389\_nt0981\_Genome\_Tile|1  
GGATGCTATAGAGGACAGTGGATATGATATGGTAGATTTTATTAATGATACTGTAGTAAG  
>HPV7\_Alpha\_9627389\_nt1001\_Genome\_Tile|1  
GATATGATATGGTAGATTTTATTAATGATACTGTAGTAAGTGAACATGAAGAACTAAGTA  
>HPV7\_Alpha\_9627389\_nt1341\_Genome\_Tile|1  
AGGTATAGAGGGGGCAGTGGGAGGGCTGCGACAGTTGAAACGGAAGCGGTTGAAGTGCT  
>HPV7\_Alpha\_9627389\_nt1381\_Genome\_Tile|1  
ACGGAAGCGGTTGAAGTGCTAGAAGAAAGCAGTGATGTTATACAGCAACTTAGTCCGCGT  
>HPV7\_Alpha\_9627389\_nt1481\_Genome\_Tile|1  
CTAAACTGTGTGGTAAGTTTAAAGAACTTTTGGAGTGGGCTTTCACGATTTGGTTAGAC  
>HPV7\_Alpha\_9627389\_nt1621\_Genome\_Tile|1  
CATACATTATTAAAAGGACAGGCATTATACTTACATACACAGTGGACAACGTGTAGATGG  
>HPV7\_Alpha\_9627389\_nt1761\_Genome\_Tile|1  
AAATGTACCAGATAATCAACTAATGGTACAACCACCTAAATTACAAAGTTCTGCAGCGGC  
>HPV7\_Alpha\_9627389\_nt2521\_Genome\_Tile|1  
TCATTGGCTGTGATTAAATGTCCTCCATTATTGTTAACATCAAATATAAACATTAAACAT  
>HPV7\_Alpha\_9627389\_nt2541\_Genome\_Tile|1  
TCCTCCATTATTGTTAACATCAAATATAAACATTAAACATGATTGCAAATATCAATATTT  
>HPV7\_Alpha\_9627389\_nt2561\_Genome\_Tile|1  
CAAATATAAACATTAAACATGATTGCAAATATCAATATTTACAGAGTAGAGTGACAGTGT  
>HPV7\_Alpha\_9627389\_nt3341\_Genome\_Tile|1  
ACTGTCGAAGGGCTACCCATTGTTGCGCCTGTTGACATCAGACATCCCGCGGCCACCGAC  
>HPV7\_Alpha\_9627389\_nt3501\_Genome\_Tile|1  
GAGACGGAGACTTGTCCATCAGTGCAGTGGACGGATGTAGTGAAGAAAATACGTGGACA  
>HPV7\_Alpha\_9627389\_nt3821\_Genome\_Tile|1  
CTTGTAATAAATACCTAAACTATTAAACATAGTTTAGGCATGTAACTATAATGTAAATA  
>HPV7\_Alpha\_9627389\_nt3841\_Genome\_Tile|1  
TATTAAACATAGTTTAGGCATGTAACTATAATGTAAATATGTTTGTATATTTGTAAAAA

>HPV7\_Alpha\_9627389\_nt3861\_Genome\_Tile|1  
TGTTAACTATAATGTAAATATGTTTGTATATTTGTAAAAAACATATGTATGGAACGCAAC  
>HPV7\_Alpha\_9627389\_nt3881\_Genome\_Tile|1  
TGTTTGTATATTTGTAAAAAACATATGTATGGAACGCAACTGTGAAGGGTAATGCATATG  
>HPV7\_Alpha\_9627389\_nt4001\_Genome\_Tile|1  
TACTAATAGTATATATACTCTGTCTTATAACTGCAATTTTAATATGCATGCATATACCTG  
>HPV7\_Alpha\_9627389\_nt4021\_Genome\_Tile|1  
TGTCTTATAACTGCAATTTTAATATGCATGCATATACCTGATTTCTGTGTCTGGAGCTCT  
>HPV7\_Alpha\_9627389\_nt4041\_Genome\_Tile|1  
AATATGCATGCATATACCTGATTTCTGTGTCTGGAGCTCTTTGATGGCCACTATTTCTAT  
>HPV7\_Alpha\_9627389\_nt4061\_Genome\_Tile|1  
ATTTCTGTGTCTGGAGCTCTTTGATGGCCACTATTTCTATTCTTTGCTTTATAACGTGGG  
>HPV7\_Alpha\_9627389\_nt4081\_Genome\_Tile|1  
TTGATGGCCACTATTTCTATTCTTTGCTTTATAACGTGGGGTGCACCTAACATCTATTATT  
>HPV7\_Alpha\_9627389\_nt4101\_Genome\_Tile|1  
TCTTTGCTTTATAACGTGGGGTGCACCTAACATCTATTATTAAACGTATTTTTTTTAGTGTT  
>HPV7\_Alpha\_9627389\_nt4141\_Genome\_Tile|1  
AACGTATTTTTTTTAGTGTTGTTAGTGTGGTATTTGCCTGCACTGTTCCCTCATATGTCA  
>HPV7\_Alpha\_9627389\_nt4161\_Genome\_Tile|1  
GTTAGTGTGGTATTTGCCTGCACTGTTCCCTCATATGTCAATTGTGTATGCTATACAACA  
>HPV7\_Alpha\_9627389\_nt4341\_Genome\_Tile|1  
CATTGTAGGACATTATATGTATACAAATATAGTAAGTAAAATACTGTGTATTAAATAAAT  
>HPV7\_Alpha\_9627389\_nt4781\_Genome\_Tile|1  
AGTCTGGGGCTCCTTCGCCAGTAATTCCACAGAGGGTGGGTTTTCAATAACATCATCAG  
>HPV7\_Alpha\_9627389\_nt4821\_Genome\_Tile|1  
GTTTTCAATAACATCATCAGGTACAGATGTCCCTGCAATTTTAGATATATCTTCTACTAA  
>HPV7\_Alpha\_9627389\_nt4841\_Genome\_Tile|1  
GTACAGATGTCCCTGCAATTTTAGATATATCTTCTACTAATACAGTACATGTTACATCTA  
>HPV7\_Alpha\_9627389\_nt4861\_Genome\_Tile|1  
TTAGATATATCTTCTACTAATACAGTACATGTTACATCTACCACACACCATAACCCATA  
>HPV7\_Alpha\_9627389\_nt5081\_Genome\_Tile|1  
TGTCAGCGCGGCCTAAAGTTGGGCTATATAGCAAAGCTTTGCAGCAAGTAGAAATAGTAG  
>HPV7\_Alpha\_9627389\_nt5101\_Genome\_Tile|1  
GGGCTATATAGCAAAGCTTTGCAGCAAGTAGAAATAGTAGATCCAACATTTATGTCCACC  
>HPV7\_Alpha\_9627389\_nt5201\_Genome\_Tile|1  
ACATTGAAGATACACTACATTTTGAACAGCCTTCTATTTCATAACGCACCAGATCCTGCCT  
>HPV7\_Alpha\_9627389\_nt5221\_Genome\_Tile|1  
TTTGAACAGCCTTCTATTTCATAACGCACCAGATCCTGCCTTTATGGATATCATTACTTTA  
>HPV7\_Alpha\_9627389\_nt5261\_Genome\_Tile|1  
TTATGGATATCATTACTTTACATAGGCCTGCCTTGACCTCTAGGCGTGGTGTGGTACGTT  
>HPV7\_Alpha\_9627389\_nt5441\_Genome\_Tile|1  
CTCTAGTGGCCTCACCTAATAACAGTGACCTTTTGTATGTTTATGCAGATATAGATGATA  
>HPV7\_Alpha\_9627389\_nt5461\_Genome\_Tile|1  
AACAGTGACCTTTTTGTATGTTTATGCAGATATAGATGATATTGATGAAAATATATTATAT  
>HPV7\_Alpha\_9627389\_nt5481\_Genome\_Tile|1  
TTATGCAGATATAGATGATATTGATGAAAATATATTATATTCTACTATAGACAATAATAC  
>HPV7\_Alpha\_9627389\_nt5501\_Genome\_Tile|1  
TTGATGAAAATATATTATATTCTACTATAGACAATAATACCAACTTCTACCTATTCCT  
>HPV7\_Alpha\_9627389\_nt5521\_Genome\_Tile|1  
TCTACTATAGACAATAATACCAACTTCTACCTATTCCTTGTATCCAGGTAATTCTACA  
>HPV7\_Alpha\_9627389\_nt5541\_Genome\_Tile|1  
ACCAACTTCTACCTATTCCTTGTATCCAGGTAATTCTACACGCATAGCAAATACATCTAT  
>HPV7\_Alpha\_9627389\_nt5561\_Genome\_Tile|1  
TGTATCCAGGTAATTCTACACGCATAGCAAATACATCTATACCTCTTGCCACAATTCCCTG  
>HPV7\_Alpha\_9627389\_nt5901\_Genome\_Tile|1

ATGCAGGTTAGTACCAGGTTATTAACCATAGGACATCCATATTTTGAATTGAAAAAGCCTA  
>HPV7\_Alpha\_9627389\_nt5921\_Genome\_Tile|1  
TTAACCATAGGACATCCATATTTTGAATTGAAAAAGCCTAATGGCGATGTATCGGTGCCT  
>HPV7\_Alpha\_9627389\_nt5941\_Genome\_Tile|1  
TTTTGAATTGAAAAAGCCTAATGGCGATGTATCGGTGCCTAAAGTGTCTGGACATCAATA  
>HPV7\_Alpha\_9627389\_nt6161\_Genome\_Tile|1  
AATAAAGATGAAGATGTGGAAACTCGTCTGTATATGGAACAGTACCTGGTCAGGACAGC  
>HPV7\_Alpha\_9627389\_nt6961\_Genome\_Tile|1  
ATATATACATGCTATGGATTCTTCCTTATTAGATGATTGGAATTTTAAAAATTGGTCCTCC  
>HPV7\_Alpha\_9627389\_nt6981\_Genome\_Tile|1  
CTTCCTTATTAGATGATTGGAATTTTAAAAATTGGTCCTCCAGCGTCTGCAACCTTGGAAG  
>HPV7\_Alpha\_9627389\_nt7021\_Genome\_Tile|1  
AGCGTCTGCAACCTTGGAAGATACTTATAGGTTTCTTACCAATAAAGCCATAGCATGTCA  
>HPV7\_Alpha\_9627389\_nt7361\_Genome\_Tile|1  
GTTGTTACTCTGGAATGTATGTATGTGTGTTTATGTATGTGTGTTTGTATATGTTGTTT  
>HPV7\_Alpha\_9627389\_nt7421\_Genome\_Tile|1  
ATGTGTGAGAAATGTATTTGTGTGTATGAATGTAATGTATTGTTGTTGTGTTGTTAATAA  
>HPV7\_Alpha\_9627389\_nt7461\_Genome\_Tile|1  
GTTGTTGTGTTTGTAAATAATAAATATATTGTGTGTTGTGTGGTAAAGTACTTTCTTTGT  
>HPV7\_Alpha\_9627389\_nt7481\_Genome\_Tile|1  
TAAATATATTGTGTGTTGTGTGGTAAAGTACTTTCTTTGTTTAAAAAGTTACTTATTA  
>HPV7\_Alpha\_9627389\_nt7601\_Genome\_Tile|1  
CTCATTACATTTGTCTAGCATGTTTTTATAACATGTTTAAAAATTGTTAGCTTTATATAACT  
>HPV7\_Alpha\_9627389\_nt7621\_Genome\_Tile|1  
GTTTTTATAACATGTTTAAAAATTGTTAGCTTTATATAACTATATAAATCCTTCAATTTCC  
>HPV7\_Alpha\_9627389\_nt7641\_Genome\_Tile|1  
ATTGTTAGCTTTATATAACTATATAAATCCTTCAATTTCCACCCATAACCGTTTCCAGTC  
>HPV7\_Alpha\_9627389\_nt7681\_Genome\_Tile|1  
ACCCATAACCGTTTCCAGTCTCGGTTGGCAAGTCACCATGTTTGTCTAGCATATTTGCATT  
>HPV7\_Alpha\_9627389\_nt7761\_Genome\_Tile|1  
TCAAAGTTCCCTGCCAAAAATGCCGCCAATATGTACTATTAGGGTGAGGTTGCCACACC  
>HPV7\_Alpha\_9627389\_nt7801\_Genome\_Tile|1  
TAGGGTGAGGTTGCCACACCTTTAATTACACTTTTATTGCACTGTTACTCATCTTATTTT  
>HPV10\_Alpha\_9627257\_nt3901\_Genome\_Tile|1  
TATTCTAATATGTCAGATATTTCTATACATATATAGATCTATAGGGTGATTGTACATTCT  
>HPV10\_Alpha\_9627257\_nt3921\_Genome\_Tile|1  
TTCTATACATATATAGATCTATAGGGTGATTGTACATTCTGGATTTTTACTTGTGTCTGAC  
>HPV10\_Alpha\_9627257\_nt4221\_Genome\_Tile|1  
ACTACTGTGTGTAATCATTTTTTGTATATAATAGCACTGTTTGTGTTATATAGACATCTTGG  
>HPV10\_Alpha\_9627257\_nt4241\_Genome\_Tile|1  
TTGTTATAATAGCACTGTTTGTGTTATATAGACATCTTGGTGTATTGTAACATAATATGT  
>HPV10\_Alpha\_9627257\_nt4261\_Genome\_Tile|1  
GTGTTATATAGACATCTTGGTGTATTGTAACATAATATGTGGTAGCCTGTACGGATCCCA  
>HPV10\_Alpha\_9627257\_nt4281\_Genome\_Tile|1  
TGTATTGTAACATAATATGTGGTAGCCTGTACGGATCCCACATAGGGGGTGTATATCAT  
>HPV10\_Alpha\_9627257\_nt4301\_Genome\_Tile|1  
GGTAGCCTGTACGGATCCCACATAGGGGGTGTATATCATATGTTGTTGTGTGTGTACC  
>HPV10\_Alpha\_9627257\_nt4321\_Genome\_Tile|1  
CATAGGGGGTGTATATCATATGTTGTTGTTGTGTGTACCCTAGTGTGCTATTGTGGCAC  
>HPV10\_Alpha\_9627257\_nt4341\_Genome\_Tile|1  
ATGTTGTTGTTGTGTGTACCTAGTGTGCTATTGTGGCACCATTCTTTTTCTATTTTTGT  
>HPV10\_Alpha\_9627257\_nt4361\_Genome\_Tile|1  
CTAGTGTGCTATTGTGGCACCATTCTTTTTCTATTTTTTGTTTTTTTTTTACAGTTAAAT  
>HPV10\_Alpha\_9627257\_nt5501\_Genome\_Tile|1  
GATGATGGTGATGTTGCTTTTACAGAGGGATATCGTAGTACCACACAGTCCAGGGGATAT

>HPV10\_Alpha\_9627257\_nt6621\_Genome\_Tile|1  
GGAGACGCCATCCCAGACACTTTCATATTAAAGAGCAACGGTGGGGGGCGAGACGTTGGT  
>HPV10\_Alpha\_9627257\_nt6821\_Genome\_Tile|1  
AGACACGACTCGCAGTACCAATATGTGCTTGTGTGTTCTTCTGAGGCCTCCCCTGCCAC  
>HPV5\_Beta\_9627145\_nt0001\_Genome\_Tile|1  
AACGGTAAGTTGCAATTTCTTGTACCAGGTGCGGTATTGGGATTTTACAATTATAATGG  
>HPV5\_Beta\_9627145\_nt0121\_Genome\_Tile|1  
ATAATATCCAATATATGTATACATAAAATAAATATATATATATAAGTGTCTAAGATTGG  
>HPV5\_Beta\_9627145\_nt0141\_Genome\_Tile|1  
ACATAAAATAAATATATATATATATAAGTGTCTAAGATTGGGTTCTTCTGTAATCAGGCAA  
>HPV5\_Beta\_9627145\_nt0161\_Genome\_Tile|1  
ATATAAGTGTCTAAGATTGGGTTCTTCTGTAATCAGGCAATGGCTGAGGGAGCCGAACAC  
>HPV5\_Beta\_9627145\_nt0181\_Genome\_Tile|1  
GTTCTTCTGTAATCAGGCAATGGCTGAGGGAGCCGAACACCAACAGAACTGACAGAAAA  
>HPV5\_Beta\_9627145\_nt0201\_Genome\_Tile|1  
TGGCTGAGGGAGCCGAACACCAACAGAACTGACAGAAAAAGATAAGGCAGAATTACCTT  
>HPV5\_Beta\_9627145\_nt0221\_Genome\_Tile|1  
CAACAGAACTGACAGAAAAAGATAAGGCAGAATTACCTTTAAGTATTAGAGACTTAGCT  
>HPV5\_Beta\_9627145\_nt0241\_Genome\_Tile|1  
AGATAAGGCAGAATTACCTTTAAGTATTAGAGACTTAGCTGAAGCCTTAGGCATCCCTGT  
>HPV5\_Beta\_9627145\_nt0261\_Genome\_Tile|1  
TAAGTATTAGAGACTTAGCTGAAGCCTTAGGCATCCCTGTGATTGATTGTTTAATACCTT  
>HPV5\_Beta\_9627145\_nt0281\_Genome\_Tile|1  
GAAGCCTTAGGCATCCCTGTGATTGATTGTTTAATACCTTGCAATTTCTGTGGCAACTTT  
>HPV5\_Beta\_9627145\_nt0341\_Genome\_Tile|1  
CTAAATTATTTGGAAGCTTGTGAATTCGACTACAAAAGGCTTAGTCTAATTTGGAAAGAT  
>HPV5\_Beta\_9627145\_nt0381\_Genome\_Tile|1  
TTAGTCTAATTTGGAAAGATTATTGTGTGTTTTCGTGCTGTGCGTATGCTGTGGCGCCA  
>HPV5\_Beta\_9627145\_nt0421\_Genome\_Tile|1  
TCGCGTATGCTGTGGCGCCACTGCAACTTATGAATTTAACCAATTTTATGAGCAGACAGT  
>HPV5\_Beta\_9627145\_nt2041\_Genome\_Tile|1  
GAATGTGCATATATGGTACGATTTTATAAGAAGGGACAAATGAGAGACATGAGTATATCT  
>HPV5\_Beta\_9627145\_nt2061\_Genome\_Tile|1  
ATTTTATAAGAAGGGACAAATGAGAGACATGAGTATATCTGAATGGATATACACTAAAAT  
>HPV5\_Beta\_9627145\_nt2081\_Genome\_Tile|1  
TGAGAGACATGAGTATATCTGAATGGATATACACTAAAATCAATGAAGTAGAAGGGGAAG  
>HPV5\_Beta\_9627145\_nt2161\_Genome\_Tile|1  
AAGTTTATTAGATACCAAAATATAAACTTTATTTGTATTCCTAACTGCATTAAAAGAATTC  
>HPV5\_Beta\_9627145\_nt2961\_Genome\_Tile|1  
AGTCACTACAGACATCTGATTTTGCTCATGAGCCATGGACTCTAGTTGATACCAGCATAG  
>HPV5\_Beta\_9627145\_nt3761\_Genome\_Tile|1  
CAGCGGGCACGAGCCGAAAGTTCAACAACCAGAGGGGGCCGAGGGTCGAGAGGGTCACGA  
>HPV5\_Beta\_9627145\_nt4021\_Genome\_Tile|1  
AATCATTTGTCAAAGGGGCGGCTAACACACTGAAAAATGTCCGCAACAGAGCTAAAATTAA  
>HPV5\_Beta\_9627145\_nt4181\_Genome\_Tile|1  
TCCTATACTCAAAGGAGAGATTTTGATGAAGCGGTGCGATACCCCAAAGGAGTTGATAAG  
>HPV5\_Beta\_9627145\_nt4661\_Genome\_Tile|1  
ATACAGTTAACCCCGTGGAACTACAGCATCATCCGTGGTCCCTCTAACTGAGTCCACAG  
>HPV5\_Beta\_9627145\_nt4921\_Genome\_Tile|1  
GAGTCTACTCCAGCACAAAGGGGAATCGTCTCTTGCAGATCACGTTTTGGTGACATCGGGT  
>HPV5\_Beta\_9627145\_nt5001\_Genome\_Tile|1  
GGGTGATATAACTGACATAATTGAGTTAGAGGAAATTCCTAGTAGGTATACATTTGAAAT  
>HPV5\_Beta\_9627145\_nt5101\_Genome\_Tile|1  
CCACGCAATCAATCTGTAGGCCGTAGGAGGGGTTTCTCTTTGACTAATAGACGTTTAGTA  
>HPV5\_Beta\_9627145\_nt5161\_Genome\_Tile|1

CAGCAGGTACAAGTGGACAATCCATTGTTTCTAACTCAACCATCTAAGTTAGTTCGTTTT  
>HPV5\_Beta\_9627145\_nt5441\_Genome\_Tile|1  
TTTACAGAGATCTTAGCTCTATTAATACTGAAGATCCTATTGAATTACAATTATTAGGCC  
>HPV5\_Beta\_9627145\_nt5561\_Genome\_Tile|1  
ATATTTCTGAAAATCCATTATCTGAAAGCATTGAAGCATATTCACATGATTTATTATTAG  
>HPV5\_Beta\_9627145\_nt5581\_Genome\_Tile|1  
TCTGAAAGCATTGAAGCATATTCACATGATTTATTATTAGATGAAACGGTGGAAAGATTC  
>HPV5\_Beta\_9627145\_nt5601\_Genome\_Tile|1  
TTCACATGATTTATTATTAGATGAAACGGTGGAAAGATTTTCAGTGGGTCTCAGCTGGTTAT  
>HPV5\_Beta\_9627145\_nt5621\_Genome\_Tile|1  
ATGAAACGGTGGAAAGATTTTCAGTGGGTCTCAGCTGGTTATAGGTAATCGAAGGAGCACAA  
>HPV5\_Beta\_9627145\_nt6281\_Genome\_Tile|1  
CTTATTTCAATAAAGTAAAGATACAGAAAACAGTAATGCATACATAACATTTTCTAAAG  
>HPV5\_Beta\_9627145\_nt6521\_Genome\_Tile|1  
ACATAGGTTTGGGAACATGAATTTTAAAGGCACTTCAAGATAGTAGATCAGATGTCAGTT  
>HPV5\_Beta\_9627145\_nt6961\_Genome\_Tile|1  
ACAAGAAATACTAATTTTCAGTATTTCTGTATATAATCAGGCTGGAGCACTAAAAGATGTT  
>HPV5\_Beta\_9627145\_nt7001\_Genome\_Tile|1  
CTGGAGCACTAAAAGATGTTGCAGACTATAATGCAGATCAATTTAGAGAATATCAAAGAC  
>HPV5\_Beta\_9627145\_nt7081\_Genome\_Tile|1  
TCTTTAATTCTACAACCTCTGTAAGGTTCCTTTAAAGGCACAGGTATTGGCACAGATCAAT  
>HPV5\_Beta\_9627145\_nt7221\_Genome\_Tile|1  
ATATATTGACTCTTTGGCTACACGGTGTCCAGATAAGAATCCTCCGAAAGAAAAGGAAGA  
>HPV5\_Beta\_9627145\_nt7441\_Genome\_Tile|1  
GGAACAAAACGCAAACGTAAAAATTGAGGTCTGACCGAAAGTGGTACATTTTTTATAAACT  
>HPV5\_Beta\_9627145\_nt7581\_Genome\_Tile|1  
CAGTCAAGTTGTTGCCAATATAGAATCAGATCAGTGCCAAACACACCGTCTTGGACTCAG  
>HPV5\_Beta\_9627145\_nt7601\_Genome\_Tile|1  
TAGAATCAGATCAGTGCCAAACACACCGTCTTGGACTCAGAACAGACCGTGTTTCGTTATA  
>HPV4\_Gamma\_9626597\_nt0201\_Genome\_Tile|1  
GTCGATCTTGCGGATCTTGCTTTATTCTATCTTAAGAACTTAGTTTAGTATTTAGAGGA  
>HPV4\_Gamma\_9626597\_nt0221\_Genome\_Tile|1  
TTTATTCTATCTTAAGAACTTAGTTTAGTATTTAGAGGAAATTGTTATTATGCATGTTG  
>HPV4\_Gamma\_9626597\_nt0241\_Genome\_Tile|1  
TTAGTTTAGTATTTAGAGGAAATTGTTATTATGCATGTTGTTCTGAATGCTTAAGATTAA  
>HPV4\_Gamma\_9626597\_nt0361\_Genome\_Tile|1  
AAATTGCTCAGAAAAAGATTAAGGAAATTTGCATTAGATGCATTTGCTGCCTTAGATTAC  
>HPV4\_Gamma\_9626597\_nt0381\_Genome\_Tile|1  
AAGGAAATTTGCATTAGATGCATTTGCTGCCTTAGATTACTTGATATTGTTGAGAAATTA  
>HPV4\_Gamma\_9626597\_nt0401\_Genome\_Tile|1  
CATTTGCTGCCTTAGATTACTTGATATTGTTGAGAAATTAGATTTATTATACTCTGACGA  
>HPV4\_Gamma\_9626597\_nt0681\_Genome\_Tile|1  
GCTATAGATGTGAAGTTGCTGTAAGAATTACATTGTATGCTGCTGAGCTCGGACTACGGA  
>HPV4\_Gamma\_9626597\_nt0721\_Genome\_Tile|1  
TGCTGAGCTCGGACTACGGACCTTGAACAACCTTCTGTAGAAGGAAAGCTGACGTTTTG  
>HPV4\_Gamma\_9626597\_nt0901\_Genome\_Tile|1  
CGTTGGATGATTTATGCGACGAAAGTAATGACGATTCAAACATTTCTAACTTAATTGATG  
>HPV4\_Gamma\_9626597\_nt1381\_Genome\_Tile|1  
TAATAGTTATTTTATAGAGCTGCTGTTGAAGTATTAGAAAGTTCAAAGATTGTTTTAAAGC  
>HPV4\_Gamma\_9626597\_nt1521\_Genome\_Tile|1  
GAAACTGTACAAAAGTTGATGTGTTCTATATTAAATATCCAAGAATATCAAATGTTATGT  
>HPV4\_Gamma\_9626597\_nt2761\_Genome\_Tile|1  
AAGCAAGCTATTCAGATACATTTAACTTTGCAATCATTGTTAAATCTCCCTTTGCATCT  
>HPV4\_Gamma\_9626597\_nt2781\_Genome\_Tile|1  
TTTAACTTTGCAATCATTGTTAAATCTCCCTTTGCATCTGAACGGTGGACATTGACAGA



>HPV4\_Gamma\_9626597\_nt2801\_Genome\_Tile|1  
TAAAAATCTCCCTTTGCATCTGAACGGTGGACATTGACAGATGTTAGTGCAGAACTGATAA  
>HPV4\_Gamma\_9626597\_nt3621\_Genome\_Tile|1  
GAACTGGGTGGAGATTGCTCACATAATCATAGTCGCATGCTTATTGCATTTGATAGCAC  
>HPV4\_Gamma\_9626597\_nt3641\_Genome\_Tile|1  
CACATAATCATAGTCGCATGCTTATTGCATTTGATAGCACTGACCAAAGAGACGCTTTTG  
>HPV4\_Gamma\_9626597\_nt3661\_Genome\_Tile|1  
CTTATTGCATTTGATAGCACTGACCAAAGAGACGCTTTTGTA AAAACACAACCTTTTTTCCT  
>HPV4\_Gamma\_9626597\_nt3681\_Genome\_Tile|1  
TGACCAAAGAGACGCTTTTGTA AAAACACAACCTTTTTTCCTAAACTGTGTACATATACCTA  
>HPV4\_Gamma\_9626597\_nt3701\_Genome\_Tile|1  
TAAAAACACAACCTTTTTTCCTAAACTGTGTACATATACCTACGGCTCATTGAATAGTTTAT  
>HPV4\_Gamma\_9626597\_nt3721\_Genome\_Tile|1  
AAACTGTGTACATATACCTACGGCTCATTGAATAGTTTATAAAATGCAAAGCTTGAGTAG  
>HPV4\_Gamma\_9626597\_nt3741\_Genome\_Tile|1  
CGGCTCATTGAATAGTTTATAAAATGCAAAGCTTGAGTAGAAGGAAAAGAGATTCAGTTC  
>HPV4\_Gamma\_9626597\_nt4001\_Genome\_Tile|1  
CCTAGTGGTACTTTAGTAAGGCCTACAGTGCCTGTGGAAAGTTTGGGACCCTCAGAAATA  
>HPV4\_Gamma\_9626597\_nt4021\_Genome\_Tile|1  
GCCTACAGTGCCTGTGGAAAGTTTGGGACCCTCAGAAATAATCCCAATAGATGCAATAGA  
>HPV4\_Gamma\_9626597\_nt4041\_Genome\_Tile|1  
GTTTGGGACCCTCAGAAATAATCCCAATAGATGCAATAGACCCAACAACATCTTCTGTTG  
>HPV4\_Gamma\_9626597\_nt4061\_Genome\_Tile|1  
ATCCCAATAGATGCAATAGACCCAACAACATCTTCTGTTGTGCCATTAGAGGATCTGACC  
>HPV4\_Gamma\_9626597\_nt4101\_Genome\_Tile|1  
TGCCATTAGAGGATCTGACCATCCAGATGTCACAGTAGATAGTGAGATACAAGAGGAA  
>HPV4\_Gamma\_9626597\_nt4121\_Genome\_Tile|1  
ATCCCAGATGTCACAGTAGATAGTGGAGATACAAGAGGAATAGGGGAGACTACTCTTCAG  
>HPV4\_Gamma\_9626597\_nt4141\_Genome\_Tile|1  
TAGTGGAGATACAAGAGGAATAGGGGAGACTACTCTTCAGCCTGCACAAGTAGATATTTT  
>HPV4\_Gamma\_9626597\_nt4161\_Genome\_Tile|1  
TAGGGGAGACTACTCTTCAGCCTGCACAAGTAGATATTTCAACATCACATGACCCTATAT  
>HPV4\_Gamma\_9626597\_nt4181\_Genome\_Tile|1  
CCTGCACAAGTAGATATTTCAACATCACATGACCCTATATCAGATGTCACTGGTGCTAGC  
>HPV4\_Gamma\_9626597\_nt4281\_Genome\_Tile|1  
CAGTGTTAGATGTGTCCCCTATAGAACCTCCCACAAAACGGATAGCATTGGCAACTAGGG  
>HPV4\_Gamma\_9626597\_nt4301\_Genome\_Tile|1  
ATAGAACCTCCCACAAAACGGATAGCATTGGCAACTAGGGGAGCCTCAGCAACTCCACAT  
>HPV4\_Gamma\_9626597\_nt4321\_Genome\_Tile|1  
GATAGCATTGGCAACTAGGGGAGCCTCAGCAACTCCACATGTAAGTGT CATATCTGGCAC  
>HPV4\_Gamma\_9626597\_nt4441\_Genome\_Tile|1  
TTCCATTGGTTATACAGAAGAAATTCCATTAGAACCGTTGAACCCCTTTCAAGAATTCGA  
>HPV4\_Gamma\_9626597\_nt4521\_Genome\_Tile|1  
CTAGTACACCACGTGACGTTTTAAATCGTGCAATAGGAAGAGCACGGGATTTATATAATA  
>HPV4\_Gamma\_9626597\_nt5041\_Genome\_Tile|1  
TACAGAAGATTTTAGTCAGTCACACTTGGTGCTTACTAGTAGCAGACGTGGGACATCATT  
>HPV4\_Gamma\_9626597\_nt5061\_Genome\_Tile|1  
CACACTTGGTGCTTACTAGTAGCAGACGTGGGACATCATTTACTATACCTACAATACCAC  
>HPV4\_Gamma\_9626597\_nt5081\_Genome\_Tile|1  
AGCAGACGTGGGACATCATTTACTATACCTACAATACCACCTGGATTAGGTCTTAGAATT  
>HPV4\_Gamma\_9626597\_nt5101\_Genome\_Tile|1  
TACTATACCTACAATACCACCTGGATTAGGTCTTAGAATTTATGTAGATGATGTAGGTTT  
>HPV4\_Gamma\_9626597\_nt5181\_Genome\_Tile|1  
CAGAATCTAGAGTAATACCTGCTGGAGGTTTACCAACTGAGCCATTTGTTTCCTCTAGAAC  
>HPV4\_Gamma\_9626597\_nt5201\_Genome\_Tile|1

GCTGGAGGTTTACCAACTGAGCCATTTGTTCTCTAGAACCCAGCTTTGTTATCTGATATA  
>HPV4\_Gamma\_9626597\_nt5241\_Genome\_Tile|1  
CAGCTTTGTTATCTGATATATTTAGTACGGATTTTGTATATCGTCCTAGTTTATATCGCA  
>HPV4\_Gamma\_9626597\_nt5601\_Genome\_Tile|1  
CTTTAATTGATAATGGCTTTTATGATTCTGATCATGAACGCCTAGTATGGAACTGAGGG  
>HPV4\_Gamma\_9626597\_nt6161\_Genome\_Tile|1  
CCAGAACCTTTTGAAGCTACCTCAGATTATTTTATTGGTGCTCAAAACCAACAAGATCAG  
>HPV4\_Gamma\_9626597\_nt6181\_Genome\_Tile|1  
CTCAGATTATTTTATTGGTGCTCAAAACCAACAAGATCAGTACACTTTAGGACCTCATAT  
>HPV4\_Gamma\_9626597\_nt6201\_Genome\_Tile|1  
CTCAAAACCAACAAGATCAGTACACTTTAGGACCTCATATTTATGTAGGGACCCCTAGTG  
>HPV4\_Gamma\_9626597\_nt6221\_Genome\_Tile|1  
TACACTTTAGGACCTCATATTTATGTAGGGACCCCTAGTGGCTCTTTAGTATCCAGTGAA  
>HPV4\_Gamma\_9626597\_nt6361\_Genome\_Tile|1  
TGTTACTCTGTAGATAACACTCATAATACAACTTTACAATTTCTGTGAAGTCAGATGG  
>HPV4\_Gamma\_9626597\_nt6381\_Genome\_Tile|1  
CTCATAATACAACTTTACAATTTCTGTGAAGTCAGATGGTCTAATGACAATTATCAGT  
>HPV4\_Gamma\_9626597\_nt6401\_Genome\_Tile|1  
ATTTCTGTGAAGTCAGATGGTGCTAATGACAATTATCAGTATAAAGCTAGTGATTTTAAA  
>HPV4\_Gamma\_9626597\_nt6421\_Genome\_Tile|1  
TGCTAATGACAATTATCAGTATAAAGCTAGTGATTTTAAACAGTACCTCAGACATATAGA  
>HPV4\_Gamma\_9626597\_nt6641\_Genome\_Tile|1  
CAATCTAGAGCTACAAGATGCCCTACACAGACCCCTGCAACTGAAAAAGAAGATCCATAT  
>HPV4\_Gamma\_9626597\_nt6781\_Genome\_Tile|1  
TTTATATCAAAGTGGTTTAATTAATGGTTCTCTAAAACGTAAAAGAATAATAAGTTCTTC  
>HPV4\_Gamma\_9626597\_nt6801\_Genome\_Tile|1  
TTAATGGTTCTCTAAAACGTAAAAGAATAATAAGTTCTTCTCATGCACAACTAATACCA  
>HPV4\_Gamma\_9626597\_nt6881\_Genome\_Tile|1  
CGGTCTCTGAAATAACAATGTGAACTCTTCTGGAATGTTTTATTCTGCCAGGAAAACCTT  
>HPV4\_Gamma\_9626597\_nt6901\_Genome\_Tile|1  
TGAACCTCTTCTGGAATGTTTTATTCTGCCAGGAAAACCTTCAACTGAGCCAAATTATTAT  
>HPV4\_Gamma\_9626597\_nt6921\_Genome\_Tile|1  
TATTCTGCCAGGAAAACCTTCAACTGAGCCAAATTATTATATAATCGTTCTTAATCTCAA  
>HPV4\_Gamma\_9626597\_nt6981\_Genome\_Tile|1  
AATTGAGCTAATTATATAAGATTTGCAAACGTGTATGTATCTGTTTTTGTGAACATAGT  
>HPV4\_Gamma\_9626597\_nt7001\_Genome\_Tile|1  
ATTTGCAAACGTGTATGTATCTGTTTTTGTGAACTATAGTGAAATAAACTGCCACATACT  
>HPV4\_Gamma\_9626597\_nt7081\_Genome\_Tile|1  
GAGTCATTTGGTCAACATGCGTCCGCACCCCAATAATTATTTGCATACACAGATCAGTAG  
>HPV4\_Gamma\_9626597\_nt7101\_Genome\_Tile|1  
GTCCGCACCCCAATAATTATTTGCATACACAGATCAGTAGGAGAGGCGCCAAGACGGACA  
>HPV4\_Gamma\_9626597\_nt7121\_Genome\_Tile|1  
TTGCATACACAGATCAGTAGGAGAGGCGCCAAGACGGACATATCCTCTTCAAATTCCTT  
>HPV4\_Gamma\_9626597\_nt7161\_Genome\_Tile|1  
TATCCTCTTCAAATTCCTTAAATTTATTGAATTTAACAACCTGTAAGCTACAAAAGACCG  
>HPV4\_Gamma\_9626597\_nt7201\_Genome\_Tile|1  
CTGTAAGCTACAAAAGACCGTTATCGTTTCTCTAACCTTGGGAAAAAGGTGAGTGAAAG  
>HPV18\_Alpha\_9626069\_nt0061\_Genome\_Tile|1  
GAAAACGGTGTATATAAAAGATGTGAGAAACACACCACAATACTATGGCGCGCTTTGAGG  
>HPV18\_Alpha\_9626069\_nt0141\_Genome\_Tile|1  
AAGCTACCTGATCTGTGCACGGAACCTGAACACTTCACTGCAAGACATAGAAATAACCTGT  
>HPV18\_Alpha\_9626069\_nt0161\_Genome\_Tile|1  
GGAACCTGAACACTTCACTGCAAGACATAGAAATAACCTGTGTATATTGCAAGACAGTATT  
>HPV18\_Alpha\_9626069\_nt0501\_Genome\_Tile|1  
CACTATAGAGGCCAGTGCCATTCGTGCTGCAACCGAGCACGACAGGAACGACTCCAACGA

>HPV18\_Alpha\_9626069\_nt1361\_Genome\_Tile|1  
ACTACAAATGGCGAACATGGCGGCAATGTATGTAGTGGCGGCAGTACGGAGGCTATAGAC  
>HPV18\_Alpha\_9626069\_nt1401\_Genome\_Tile|1  
GCAGTACGGAGGCTATAGACAACGGGGGCACAGAGGGCAACAACAGCAGTGTAGACGGTA  
>HPV18\_Alpha\_9626069\_nt1441\_Genome\_Tile|1  
CAACAGCAGTGTAGACGGTACAAGTGACAATAGCAATATAGAAAATGTAAATCCACAATG  
>HPV18\_Alpha\_9626069\_nt1481\_Genome\_Tile|1  
GAAAATGTAAATCCACAATGTACCATAGCACAAATTAAGACTTGTAAAAAGTAAACAAT  
>HPV18\_Alpha\_9626069\_nt1501\_Genome\_Tile|1  
TACCATAGCACAAATTAAGACTTGTAAAAAGTAAACAATAACAAGGAGCTATGTTAGC  
>HPV18\_Alpha\_9626069\_nt1521\_Genome\_Tile|1  
ACTTGTAAAAAGTAAACAATAACAAGGAGCTATGTTAGCAGTATTTAAAGACACATATG  
>HPV18\_Alpha\_9626069\_nt2241\_Genome\_Tile|1  
GGGGAGATTGGAGACCAATAGTGCAATTCCTGCGATACCAACAAATAGAGTTTATAACAT  
>HPV18\_Alpha\_9626069\_nt2261\_Genome\_Tile|1  
GTGCAATTCCTGCGATACCAACAAATAGAGTTTATAACATTTTATAGGAGCCTTAAATCA  
>HPV18\_Alpha\_9626069\_nt3281\_Genome\_Tile|1  
CTGTGTAAGTCACAGGGGATTGTATTATGTAAAGGAAGGGTACAACACGTTTTATATAGA  
>HPV18\_Alpha\_9626069\_nt3301\_Genome\_Tile|1  
TGTATTATGTAAAGGAAGGGTACAACACGTTTTATATAGAATTTAAAGTGAATGTGAAA  
>HPV18\_Alpha\_9626069\_nt3461\_Genome\_Tile|1  
TCAGCTTGTTAAACAGCTACAGCACACCCCTCACCGTATTCCAGCACCGTGTCCGTGGG  
>HPV18\_Alpha\_9626069\_nt3561\_Genome\_Tile|1  
CCTGGACACTGTGGACTCGCGGAGAAGCAGCATTGTGGACCTGTCAACCCACTTCTCGGT  
>HPV18\_Alpha\_9626069\_nt3581\_Genome\_Tile|1  
GGAGAAGCAGCATTGTGGACCTGTCAACCCACTTCTCGGTGCAGCTACACCTACAGGCAA  
>HPV18\_Alpha\_9626069\_nt3601\_Genome\_Tile|1  
CTGTCAACCCACTTCTCGGTGCAGCTACACCTACAGGCAACAACAAAAGACGGAACTCT  
>HPV18\_Alpha\_9626069\_nt3701\_Genome\_Tile|1  
CAGAAACAGTTTAAATGTTTACGGTACAGATTGCGAAAACATAGCGACCACTATAGAGA  
>HPV18\_Alpha\_9626069\_nt3721\_Genome\_Tile|1  
TACGGTACAGATTGCGAAAACATAGCGACCACTATAGAGATATATCATCCACCTGGCATT  
>HPV18\_Alpha\_9626069\_nt3761\_Genome\_Tile|1  
TATATCATCCACCTGGCATTGGACAGGTGCAGGCAATGAAAAACAGGAATACTGACTGT  
>HPV18\_Alpha\_9626069\_nt3901\_Genome\_Tile|1  
ACATGACAATGTAATACATATGCTGTAGTACCAATATGTTATCACTTATTTTTTTATTTT  
>HPV18\_Alpha\_9626069\_nt4041\_Genome\_Tile|1  
GTATTTGTGTATATTGTGGTAATAACGTCCCTGCCACAGCATTACAGTATATGTATTT  
>HPV18\_Alpha\_9626069\_nt4101\_Genome\_Tile|1  
TGTTTTTTTATTGCCCATGTTACTATTGCATATACATGCTATATTGTCTTTACAGTAATTG  
>HPV18\_Alpha\_9626069\_nt4121\_Genome\_Tile|1  
ACTATTGCATATACATGCTATATTGTCTTTACAGTAATTGTATAGGTTGTTTTATACAGT  
>HPV18\_Alpha\_9626069\_nt4141\_Genome\_Tile|1  
TATTGTCTTTACAGTAATTGTATAGGTTGTTTTATACAGTGTATTGTACATTGTATATTT  
>HPV18\_Alpha\_9626069\_nt4161\_Genome\_Tile|1  
TATAGGTTGTTTTATACAGTGTATTGTACATTGTATATTTTGTTTTATACCTTTTATGCT  
>HPV18\_Alpha\_9626069\_nt4181\_Genome\_Tile|1  
GTATTGTACATTGTATATTTTGTTTTATACCTTTTATGCTTTTGTATTTTGTAAATAAA  
>HPV18\_Alpha\_9626069\_nt4541\_Genome\_Tile|1  
GACCCATCTATTGTTACATTAATAGAGGACTCCAGTGTGGTTACATCAGGTGCACCTAGG  
>HPV18\_Alpha\_9626069\_nt4621\_Genome\_Tile|1  
TGGGTTTGATATAACATCTGCGGGTACAACCTACACCTGCGGTTTTGGATATCACACCTTC  
>HPV18\_Alpha\_9626069\_nt4641\_Genome\_Tile|1  
CGGGTACAACCTACACCTGCGGTTTTGGATATCACACCTTCGTCTACCTCTGTGTCTATTT  
>HPV18\_Alpha\_9626069\_nt4661\_Genome\_Tile|1

GTTTTGGATATCACACCTTCGTCTACCTCTGTGTCTATTTCCACAACCAATTTTACCAAT  
>HPV18\_Alpha\_9626069\_nt5301\_Genome\_Tile|1  
ATGACATGGACCCTGCAGTGCCTGTACCATCGCGTTCTACTACCTCCTTGCATTTTTTTA  
>HPV18\_Alpha\_9626069\_nt5321\_Genome\_Tile|1  
CCTGTACCATCGCGTTCTACTACCTCCTTGCATTTTTTTAAATATTTCGCCCACTATATCT  
>HPV18\_Alpha\_9626069\_nt5341\_Genome\_Tile|1  
TACCTCCTTTGCATTTTTTTAAATATTTCGCCCACTATATCTTCTGCCTCTTCCTATAGTAA  
>HPV18\_Alpha\_9626069\_nt5361\_Genome\_Tile|1  
AATATTTCGCCCACTATATCTTCTGCCTCTTCCTATAGTAATGTAACGGTCCCTTTAACCT  
>HPV18\_Alpha\_9626069\_nt5421\_Genome\_Tile|1  
CCTCTTGGGATGTGCCTGTATACACGGGTCCTGATATTACATTACCATCTACTACCTCTG  
>HPV18\_Alpha\_9626069\_nt5481\_Genome\_Tile|1  
TATGGCCCATTTGTATACCCACGGCCCTGCCTCTACACAGTATATTGGTATACATGGTA  
>HPV18\_Alpha\_9626069\_nt5981\_Genome\_Tile|1  
TAATAAATTAGATGACACTGAAAGTTCCTATGCCGCCACGTCTAATGTTTCTGAGGACGT  
>HPV18\_Alpha\_9626069\_nt6001\_Genome\_Tile|1  
AAAGTTCCCATGCCGCCACGTCTAATGTTTCTGAGGACGTTAGGGACAATGTGTCTGTAG  
>HPV18\_Alpha\_9626069\_nt6441\_Genome\_Tile|1  
ATTAAAGGCACAGGTATGCCTGCCTCACCTGGCAGCTGTGTGTTCTCCCTCTCCAAGT  
>HPV18\_Alpha\_9626069\_nt6621\_Genome\_Tile|1  
ACTCCAGTACCAATTTAACAATATGTGCTTCTACACAGTCTCCTGTACCTGGGCAATAT  
>HPV18\_Alpha\_9626069\_nt6641\_Genome\_Tile|1  
AATATGTGCTTCTACACAGTCTCCTGTACCTGGGCAATATGATGCTACCAAATTTAAGCA  
>HPV18\_Alpha\_9626069\_nt7081\_Genome\_Tile|1  
CTGCCACTACGTCTTCTAAACCTGCCAAGCGTGTGCGTGTACGTGCCAGGAAGTAATATG  
>HPV18\_Alpha\_9626069\_nt7161\_Genome\_Tile|1  
CATCTATTGTTGTGTTTGTATGTCCTGTGTTTGTGTTTGTGTTGTATGATTGCATTGTATGG  
>HPV18\_Alpha\_9626069\_nt7201\_Genome\_Tile|1  
TGTATGATTGCATTGTATGGTATGTATGGTTGTTGTTGTATGTTGTATGTTACTATATTT  
>HPV18\_Alpha\_9626069\_nt7221\_Genome\_Tile|1  
TATGTATGGTTGTTGTTGTATGTTGTATGTTACTATATTTGTTGGTATGTGGCATTAAAT  
>HPV18\_Alpha\_9626069\_nt7281\_Genome\_Tile|1  
AAAATATGTTTTGTGGTTCTGTGTGTTATGTGGTTGCGCCCTAGTGAGTAACAACGTAT  
>HPV18\_Alpha\_9626069\_nt7321\_Genome\_Tile|1  
CTAGTGAGTAACAACGTATTTGTGTTTGTGGTATGGGTGTTGCTTGTGTTGGGCTATATAT  
>HPV18\_Alpha\_9626069\_nt7341\_Genome\_Tile|1  
TTGTGTTTGTGGTATGGGTGTTGCTTGTGTTGGGCTATATATTGTCCTGTATTTCAAGTTAT  
>HPV18\_Alpha\_9626069\_nt7541\_Genome\_Tile|1  
GGGCACTGCTCCTACATATTTTGAACAATTGGCGCGCCTCTTTGGCGCATATAAGGCGCA  
>HPV18\_Alpha\_9626069\_nt7721\_Genome\_Tile|1  
AATTGCATACTTGGCTTGTACAACACTTTTCATGTCCAACATTCTGTCTACCCTTAACAT  
>HPV18\_Alpha\_9626069\_nt7741\_Genome\_Tile|1  
CAACTACTTTCATGTCCAACATTCTGTCTACCCTTAACATGAACTATAATATGACTAAGC  
>HPVFA75/KI88-03\_Unclassified\_206902429\_nt0001\_Genome\_Tile|1  
AACGGTAAGTTTTTATTTGTTTGAACCGCTGCCGGTTGCTATATTACTCATTTATCTGAT  
>HPVFA75/KI88-03\_Unclassified\_206902429\_nt0041\_Genome\_Tile|1  
ATATTACTCATTTATCTGATTGTGGTTTACAACAACCATTCCTTAATTAAATACATGTGA  
>HPVFA75/KI88-03\_Unclassified\_206902429\_nt0121\_Genome\_Tile|1  
CCTATAAAATTACTTGAAGAATATTAGAGACACATATACTGATGGAGAGGCCTAGAACAG  
>HPVFA75/KI88-03\_Unclassified\_206902429\_nt0141\_Genome\_Tile|1  
ATATTAGAGACACATATACTGATGGAGAGGCCTAGAACAGTACAAGTTCTGAGTCGGCAT  
>HPVFA75/KI88-03\_Unclassified\_206902429\_nt0161\_Genome\_Tile|1  
GATGGAGAGGCCTAGAACAGTACAAGTTCTGAGTCGGCATTTAGAAATACCAATAGAAGA  
>HPVFA75/KI88-03\_Unclassified\_206902429\_nt0181\_Genome\_Tile|1  
TACAAGTTCTGAGTCGGCATTTAGAAATACCAATAGAAGATTTATTGGTACCATGCAAGT

>HPVFA75/KI88-03\_Unclassified\_206902429\_nt0201\_Genome\_Tile|1  
TTAGAAATACCAATAGAAAGATTTATTGGTACCATGCAAGTTTTGTGAGCGCTTTTAAACA  
>HPVFA75/KI88-03\_Unclassified\_206902429\_nt0221\_Genome\_Tile|1  
TTTATTGGTACCATGCAAGTTTTGTGAGCGCTTTTAAACATATATAGAACTTTTGCAATT  
>HPVFA75/KI88-03\_Unclassified\_206902429\_nt0261\_Genome\_Tile|1  
TATATAGAACTTTTGCAATTTGATTACAAACAATTGCAACTCATTGGATTGAAGATTTA  
>HPVFA75/KI88-03\_Unclassified\_206902429\_nt0301\_Genome\_Tile|1  
TCATTTGGATTGAAGATTTAGTGTATGCTCTTTGCTCTAGTTGTGCATATGCATCTGCTG  
>HPVFA75/KI88-03\_Unclassified\_206902429\_nt0321\_Genome\_Tile|1  
GTGTATGCTCTTTGCTCTAGTTGTGCATATGCATCTGCTGCATTTGAATACAAAATTAT  
>HPVFA75/KI88-03\_Unclassified\_206902429\_nt0361\_Genome\_Tile|1  
CATTTGAATACAAAATTATTTAGAAGGCACAGTCAAAGGCAGAGAAATAGAGCAGGTGA  
>HPVFA75/KI88-03\_Unclassified\_206902429\_nt0381\_Genome\_Tile|1  
TTAGAAGGCACAGTCAAAGGCAGAGAAATAGAGCAGGTGACTCAACAGTCTGTAGGCTTT  
>HPVFA75/KI88-03\_Unclassified\_206902429\_nt0401\_Genome\_Tile|1  
CAGAGAAATAGAGCAGGTGACTCAACAGTCTGTAGGCTTTATTACTATCAGATGCATTTA  
>HPVFA75/KI88-03\_Unclassified\_206902429\_nt0421\_Genome\_Tile|1  
CTCAACAGTCTGTAGGCTTTATTACTATCAGATGCATTTATTGTTTAAAGCATCTAGACC  
>HPVFA75/KI88-03\_Unclassified\_206902429\_nt0441\_Genome\_Tile|1  
ATTACTATCAGATGCATTTATTGTTTAAAGCATCTAGACCTTTTAGAAAAGTTAGACAAT  
>HPVFA75/KI88-03\_Unclassified\_206902429\_nt0761\_Genome\_Tile|1  
CGCCTTCGACTATTTGTGATTGCTACCTTCTTTGGAATCCGCACACAGCAAGAACTTTTA  
>HPVFA75/KI88-03\_Unclassified\_206902429\_nt0841\_Genome\_Tile|1  
GTGTCCTCAGTGCCGAGAGGTCATTTCGCAATGGCGGACAAGGACCATAAAGGTATTGATG  
>HPVFA75/KI88-03\_Unclassified\_206902429\_nt1121\_Genome\_Tile|1  
CCTCAGTCCTAAAGAGAAAGAGATCCTGCAGCTCAGTCCGCAGCTGGAGTCAATCTCCCT  
>HPVFA75/KI88-03\_Unclassified\_206902429\_nt1341\_Genome\_Tile|1  
TATAAAGCGCTGTTAAAGTGCAAGCAATGCAAAAGCAACATTGTTAAAGTAAATTTAAGGAT  
>HPVFA75/KI88-03\_Unclassified\_206902429\_nt1361\_Genome\_Tile|1  
CAGCAATGCAAAAGCAACATTGTTAAGTAAATTTAAGGATGCGTTTGGAGTGAGTTTTAA  
>HPVFA75/KI88-03\_Unclassified\_206902429\_nt1381\_Genome\_Tile|1  
TGTTAAGTAAATTTAAGGATGCGTTTGGAGTGAGTTTTAATGAGCTCACAAGGCACTATC  
>HPVFA75/KI88-03\_Unclassified\_206902429\_nt1421\_Genome\_Tile|1  
TGAGCTCACAAGGCACTATCAAAGTAATAAGACATGTTGTAGGGATCGGGTTGTTAGTAT  
>HPVFA75/KI88-03\_Unclassified\_206902429\_nt1481\_Genome\_Tile|1  
TTATGCAGTGAAAGATGATCTGTTAGAAGGGTCTAAGCATTTATTACAAAAGCATTGTTT  
>HPVFA75/KI88-03\_Unclassified\_206902429\_nt1521\_Genome\_Tile|1  
TTATTACAAAAGCATTGTTTCATATATTTGGATGCATGTTTTACAACCAATGTCATTATTT  
>HPVFA75/KI88-03\_Unclassified\_206902429\_nt1621\_Genome\_Tile|1  
TTAGATTACTATCTTCTATTTTGCAAGTAAATGAAATTCAAACATTGTCTGAACCACCTA  
>HPVFA75/KI88-03\_Unclassified\_206902429\_nt1741\_Genome\_Tile|1  
ATACTTTTGGAACATATCCTGATTGGATAGTGACACAACTATGATTAGCCATCAATCTT  
>HPVFA75/KI88-03\_Unclassified\_206902429\_nt1761\_Genome\_Tile|1  
GATTGGATAGTGACACAACTATGATTAGCCATCAATCTTTGGAGGCCACGCAATTTTCT  
>HPVFA75/KI88-03\_Unclassified\_206902429\_nt1781\_Genome\_Tile|1  
TATGATTAGCCATCAATCTTTGGAGGCCACGCAATTTCTTTATCTGACATGATACAGTG  
>HPVFA75/KI88-03\_Unclassified\_206902429\_nt2121\_Genome\_Tile|1  
TTAGATAAGTTTAGGACATTTTTCGAGAATACACCTAAAAGGAATTGCATTTTATTTTCA  
>HPVFA75/KI88-03\_Unclassified\_206902429\_nt2141\_Genome\_Tile|1  
TTTGCAGAATACACCTAAAAGGAATTGCATTTTATTTTATGAGGCTCCTGATTCAGGGAA  
>HPVFA75/KI88-03\_Unclassified\_206902429\_nt2301\_Genome\_Tile|1  
AAAATAGCACTGCTAGACGATGCTACATATGAGTGTTGGAATTATTTTGATACATTCTTA  
>HPVFA75/KI88-03\_Unclassified\_206902429\_nt2341\_Genome\_Tile|1  
ATTATTTTGATACATTCTTAAGAAATGGCATTGATGGAAACCCAGTCAGTCTAGATATAA  
>HPVFA75/KI88-03\_Unclassified\_206902429\_nt2421\_Genome\_Tile|1

ATACAATTTCCACCTTTAATGATAACATCTAATATAGATATTAATAAAGAAGATAGATAT  
>HPVFA75/KI88-03\_Unclassified\_206902429\_nt2441\_Genome\_Tile|1  
GATAACATCTAATATAGATATTAATAAAGAAGATAGATATAGGTATTTGCAAAGTAGAAT  
>HPVFA75/KI88-03\_Unclassified\_206902429\_nt2461\_Genome\_Tile|1  
TTAATAAAGAAGATAGATATAGGTATTTGCAAAGTAGAATCATGTCATTTGAATTTCCCTA  
>HPVFA75/KI88-03\_Unclassified\_206902429\_nt2481\_Genome\_Tile|1  
AGGTATTTGCAAAGTAGAATCATGTCATTTGAATTTCCCTAATAAATTTCCCTTTTGATAGT  
>HPVFA75/KI88-03\_Unclassified\_206902429\_nt2761\_Genome\_Tile|1  
CAGGTGCTTTTAAATTATGCAAGGAGGAATGGTGTTATGCGCCTAGGATATCAACCTGTA  
>HPVFA75/KI88-03\_Unclassified\_206902429\_nt2881\_Genome\_Tile|1  
CAAAGTTTACAACTTCTGAGTATGCTGATGAACCGTGGAACCTGGTGCAGACTAGCCTT  
>HPVFA75/KI88-03\_Unclassified\_206902429\_nt3021\_Genome\_Tile|1  
AAATCTTATGATTTATACTGTATGGACATGGATATATTATCAAAACTCAGATGATAAGTG  
>HPVFA75/KI88-03\_Unclassified\_206902429\_nt3081\_Genome\_Tile|1  
GCAAAAGGTAGAAGGTGCTGTGGACTATGAGGGTGCTTACTATACAGAGGGAAACATAA  
>HPVFA75/KI88-03\_Unclassified\_206902429\_nt3101\_Genome\_Tile|1  
TGGACTATGAGGGTGCTTACTATACAGAGGGAAACATAAGCACTACTACCTTAGATTTG  
>HPVFA75/KI88-03\_Unclassified\_206902429\_nt3121\_Genome\_Tile|1  
TATACAGAGGGAAACATAAGCACTACTACCTTAGATTTGAAGCAGATGCTAACAGATTT  
>HPVFA75/KI88-03\_Unclassified\_206902429\_nt3281\_Genome\_Tile|1  
CCTCCGACACCACATCCCTCCAGCCCTCTTCCAGCGTCTCCACCACACAAAAACGATACG  
>HPVFA75/KI88-03\_Unclassified\_206902429\_nt3401\_Genome\_Tile|1  
AAGGAGACGGAGAAGGAACGCAGGCGACATCGAGACAACGTGTCAGATCAAGATCAAGAC  
>HPVFA75/KI88-03\_Unclassified\_206902429\_nt3481\_Genome\_Tile|1  
CAAGAAACCTCAGTCAAACGAGGGAAAGGGCGAGGAGGAGGGTCACGAGGGAGAAGAGAA  
>HPVFA75/KI88-03\_Unclassified\_206902429\_nt3761\_Genome\_Tile|1  
ATCAGCTTAAATGCTATCGCTACAGGGTGCATAAAAGGCATAAGGGTGGCTACAAATATG  
>HPVFA75/KI88-03\_Unclassified\_206902429\_nt3821\_Genome\_Tile|1  
TCAGTAGTACTTGGTCATGGATCACAGAACATAACAATGACAGAGTGGGACGCGCTCGGA  
>HPVFA75/KI88-03\_Unclassified\_206902429\_nt3841\_Genome\_Tile|1  
ATCACAGAACATAACAATGACAGAGTGGGACGCGCTCGGATGCTTGTTCTGTTTTTCATCA  
>HPVFA75/KI88-03\_Unclassified\_206902429\_nt3861\_Genome\_Tile|1  
CAGAGTGGGACGCGCTCGGATGCTTGTTCTGTTTTTCATCAACAGAACAAAGGGAAGCATT  
>HPVFA75/KI88-03\_Unclassified\_206902429\_nt3881\_Genome\_Tile|1  
TGCTTGTTCTGTTTTTCATCAACAGAACAAAGGGAAGCATTCTAGACACTATGAAATTAC  
>HPVFA75/KI88-03\_Unclassified\_206902429\_nt3941\_Genome\_Tile|1  
CTCAGGGTGTTGATTGGTCTATGGGAATCTTGATAATTTTTTAATTAACCTAACCCTTTTT  
>HPVFA75/KI88-03\_Unclassified\_206902429\_nt3961\_Genome\_Tile|1  
TATGGGAATCTTGATAATTTTTTAATTAACCTAACCCTTTTTTACTAATTGCATGCTTTTACA  
>HPVFA75/KI88-03\_Unclassified\_206902429\_nt3981\_Genome\_Tile|1  
TTAATTAACCTAACCCTTTTTTACTAATTGCATGCTTTTACACTAATATACTAATCTGCTAA  
>HPVFA75/KI88-03\_Unclassified\_206902429\_nt4621\_Genome\_Tile|1  
CTGAGTCTACACCAATAGCTGGGGAGTCTTCATTATCAGATCATATATTGGTGTTTGAAA  
>HPVFA75/KI88-03\_Unclassified\_206902429\_nt4641\_Genome\_Tile|1  
GGGGAGTCTTCATTATCAGATCATATATTGGTGTTTGAAAACACAGGGGGTCAAGCTATA  
>HPVFA75/KI88-03\_Unclassified\_206902429\_nt4661\_Genome\_Tile|1  
TCATATATTGGTGTTTGAAAACACAGGGGGTCAAGCTATAGGTGGTACAAGAGAAGAAAT  
>HPVFA75/KI88-03\_Unclassified\_206902429\_nt4681\_Genome\_Tile|1  
ACACAGGGGGTCAAGCTATAGGTGGTACAAGAGAAGAAATTGAACTACAATCATTACCTT  
>HPVFA75/KI88-03\_Unclassified\_206902429\_nt4721\_Genome\_Tile|1  
TGAACCTACAATCATTACCTTCCAGGTATAGCTTTGAAATAGAAGAGGCCACTCCTACTCG  
>HPVFA75/KI88-03\_Unclassified\_206902429\_nt4801\_Genome\_Tile|1  
AAAGAGGTAGGCAAGCTGTTTCTGCTTTACGTAGGGCCTTGACAATCGAAGATTAACCTC  
>HPVFA75/KI88-03\_Unclassified\_206902429\_nt4841\_Genome\_Tile|1  
GTACAATCGAAGATTAACCTCAACAGATAGCTGTAGAAGACCCTTTATTTTTTATCCAAACC

>HPVFA75/KI88-03\_Unclassified\_206902429\_nt5041\_Genome\_Tile|1  
ATTCTGAAACTCCTCAAGGCTATGTTAGGGTAAGTAGGCTAGGGCGACGCGCTTCCCTAA  
>HPVFA75/KI88-03\_Unclassified\_206902429\_nt5061\_Genome\_Tile|1  
TATGTTAGGGTAAGTAGGCTAGGGCGACGCGCTTCCCTAAGGACTAGGAGTGGTACTCAG  
>HPVFA75/KI88-03\_Unclassified\_206902429\_nt5081\_Genome\_Tile|1  
AGGGCGACGCGCTTCCCTAAGGACTAGGAGTGGTACTCAGGTTGGTGCACAGGTTCAATTT  
>HPVFA75/KI88-03\_Unclassified\_206902429\_nt5141\_Genome\_Tile|1  
CTACAGGGACCTTAGTACAATTAACACTGAGGAGCCCATAGAATTACAACCTTTTAGGAGA  
>HPVFA75/KI88-03\_Unclassified\_206902429\_nt5221\_Genome\_Tile|1  
TTGTACAAGGGCCTGTTGAAAGTACACTTATAGATGTTAATATTAATGAAACACCTAGCC  
>HPVFA75/KI88-03\_Unclassified\_206902429\_nt5241\_Genome\_Tile|1  
AGTACACTTATAGATGTTAATATTAATGAAACACCTAGCCTTTTGGAAACTTCAGAATTT  
>HPVFA75/KI88-03\_Unclassified\_206902429\_nt5261\_Genome\_Tile|1  
TATTAATGAAACACCTAGCCTTTTGGAAACTTCAGAATTTAATTCTGAAGATTTATTACT  
>HPVFA75/KI88-03\_Unclassified\_206902429\_nt5361\_Genome\_Tile|1  
TTTGGTACATCTAGGAGGTCAACTTCATCTGTTACTGTACCTAGATTCTAGTTCTCCTAGG  
>HPVFA75/KI88-03\_Unclassified\_206902429\_nt5381\_Genome\_Tile|1  
AACTTCATCTGTTACTGTACCTAGATTCTAGTTCTCCTAGGGAACAAGTTTATATATTCA  
>HPVFA75/KI88-03\_Unclassified\_206902429\_nt5401\_Genome\_Tile|1  
CTAGATTCTAGTTCTCCTAGGGAACAAGTTTATATATTCAAGATATTGAAGGTTATAATG  
>HPVFA75/KI88-03\_Unclassified\_206902429\_nt6141\_Genome\_Tile|1  
ATGTGAAAATGCAGGAGATCAACAGGGAAAATGTCCACCTATAGAAGTGAATAATCTGT  
>HPVFA75/KI88-03\_Unclassified\_206902429\_nt6241\_Genome\_Tile|1  
ATAAATTTTAAACTCTATCCCTGAATAGATCAGATGTTAGCTTAGATTTAGTAGACGAA  
>HPVFA75/KI88-03\_Unclassified\_206902429\_nt6401\_Genome\_Tile|1  
TTACCAGAGGAGGTAATGTTGGAGACGCTACTCCAGATGGAGCAAATAATCAAGATCATA  
>HPVFA75/KI88-03\_Unclassified\_206902429\_nt6421\_Genome\_Tile|1  
GGAGACGCTACTCCAGATGGAGCAAATAATCAAGATCATAAATTTTATTACCTCCTAAG  
>HPVFA75/KI88-03\_Unclassified\_206902429\_nt6441\_Genome\_Tile|1  
AGCAAATAATCAAGATCATAAATTTTATTACCTCCTAAGTCATCACAAAGTCAAACACT  
>HPVFA75/KI88-03\_Unclassified\_206902429\_nt6461\_Genome\_Tile|1  
AATTTTATTACCTCCTAAGTCATCACAAAGTCAAACACTAGGAAATTCATTTACTTTC  
>HPVFA75/KI88-03\_Unclassified\_206902429\_nt6481\_Genome\_Tile|1  
TCATCACAAAGTCAAACACTAGGAAATTCATTTACTTTCCTACTGTTAGTGGTCTCTA  
>HPVFA75/KI88-03\_Unclassified\_206902429\_nt6641\_Genome\_Tile|1  
TTGCTGATAACACTAGAAACACTAACTTTACCATTTGTGTACCTTCAGATAATGGTGCTA  
>HPVFA75/KI88-03\_Unclassified\_206902429\_nt6661\_Genome\_Tile|1  
ACTAACTTTACCATTTGTGTACCTTCAGATAATGGTGCTATAACTGAGTATGATTCTAGC  
>HPVFA75/KI88-03\_Unclassified\_206902429\_nt6681\_Genome\_Tile|1  
ACCTTCAGATAATGGTGCTATAACTGAGTATGATTCTAGCAAATTTAGAGAATTTTAAAG  
>HPVFA75/KI88-03\_Unclassified\_206902429\_nt6701\_Genome\_Tile|1  
TAACTGAGTATGATTCTAGCAAATTTAGAGAATTTTAAAGGCACGTGGAAGAGTATCAA  
>HPVFA75/KI88-03\_Unclassified\_206902429\_nt6761\_Genome\_Tile|1  
TATCTGTAATATTACAAGTGTGTAAAGTATCACTGCAACCTGATGTGCTAGCCCAGATCA  
>HPVFA75/KI88-03\_Unclassified\_206902429\_nt6861\_Genome\_Tile|1  
ATTTGTACCAACTCCTGACAATGCAGTACATGACACCTATAGATTTATAAATTCCTCAGC  
>HPVFA75/KI88-03\_Unclassified\_206902429\_nt6881\_Genome\_Tile|1  
ATGCAGTACATGACACCTATAGATTTATAAATTCCTCAGCCACTAAATGTCCAGATAAGG  
>HPVFA75/KI88-03\_Unclassified\_206902429\_nt6901\_Genome\_Tile|1  
AGATTTATAAATTCCTCAGCCACTAAATGTCCAGATAAGGTTCTGCAAAAGATAGAGAG  
>HPVFA75/KI88-03\_Unclassified\_206902429\_nt7021\_Genome\_Tile|1  
TTAGATCAATATCCTTTAGGAAGAAAGTTTTTGTTCCTCAAGCAGGATTACAGAACACCAGG  
>HPVFA75/KI88-03\_Unclassified\_206902429\_nt7041\_Genome\_Tile|1  
AAGAAAGTTTTTGTTCCTCAAGCAGGATTACAGAACACCAGGGTCAAATCATTAAGCGTAG  
>HPVFA75/KI88-03\_Unclassified\_206902429\_nt7081\_Genome\_Tile|1

GTCAAATCATTAAGCGTAGCAGATCTGTTTCTCGGGGTACTGCAAAACGACGACGGACA  
>HPVFA75/KI88-03\_Unclassified\_206902429\_nt7261\_Genome\_Tile|1  
GTATAATCTGCTTATAAATCGCAGCCGGTACTTCACCTTACAAAGACTTGGCAGTCTGTC  
>HPV9\_Beta\_9627396\_nt0141\_Genome\_Tile|1  
CATTTTCATATGACCGCCTTCGTTAATAAGCTTATATAGACATAAATATATAAGGTGCCA  
>HPV9\_Beta\_9627396\_nt0161\_Genome\_Tile|1  
CGTTAATAAGCTTATATAGACATAAATATATAAGGTGCCATGTATTTAACAGAGCAGATT  
>HPV9\_Beta\_9627396\_nt0181\_Genome\_Tile|1  
CATAAATATATAAGGTGCCATGTATTTAACAGAGCAGATTATGGACAGGCCAAAACCTAG  
>HPV9\_Beta\_9627396\_nt0261\_Genome\_Tile|1  
ACACTCTTGATTCCTTTAATAGATTTGTTGATACCTTGTAATTTTGCAATAGATTTT  
>HPV9\_Beta\_9627396\_nt0281\_Genome\_Tile|1  
ATAGATTTGTTGATACCTTGTAATTTTGCAATAGATTTTATCTTATTTTGAGCTACTT  
>HPV9\_Beta\_9627396\_nt0301\_Genome\_Tile|1  
TAAATTTTGCAATAGATTTTATCTTATTTGAGCTACTTAATTTTGATCACAAGTGTTT  
>HPV9\_Beta\_9627396\_nt0321\_Genome\_Tile|1  
TATCTTATTTTGAGCTACTTAATTTTGATCACAAGTGTTTACAGCTTATTTGGACAGAGG  
>HPV9\_Beta\_9627396\_nt0341\_Genome\_Tile|1  
AATTTTGATCACAAGTGTTTACAGCTTATTTGGACAGAGGAGGATTTGGTGTATGGACTC  
>HPV9\_Beta\_9627396\_nt0401\_Genome\_Tile|1  
TGTAGTAGCTGTGCTTATGCGTCTGCACAGTTAGAATTTACACATTTTTTTCAATTTGCT  
>HPV9\_Beta\_9627396\_nt0421\_Genome\_Tile|1  
GTCTGCACAGTTAGAATTTACACATTTTTTTTCAATTTGCTGTAGTTGGAAAAGATATAGA  
>HPV9\_Beta\_9627396\_nt0441\_Genome\_Tile|1  
CACATTTTTTTTCAATTTGCTGTAGTTGGAAAAGATATAGAACTGTAGAAGGAACAGCTA  
>HPV9\_Beta\_9627396\_nt0481\_Genome\_Tile|1  
AACTGTAGAAGGAACAGCTATTGGAAATATTTGTATTAGGTGTCGCTACTGTTTTAAGTT  
>HPV9\_Beta\_9627396\_nt0521\_Genome\_Tile|1  
TGTCGCTACTGTTTTAAGTTATTAGACTTAGTGGAGAAGTTAGCTACATGCTATAAGTTT  
>HPV9\_Beta\_9627396\_nt0541\_Genome\_Tile|1  
ATTAGACTTAGTGGAGAAGTTAGCTACATGCTATAAGTTTGAGCAGTTTTATAAGGTCAG  
>HPV9\_Beta\_9627396\_nt0761\_Genome\_Tile|1  
AGTGTCTCACTCCCTACAAGATCGTAGCTGGCTGTGGTTGCGGTGCAAGACTTCGTTTAT  
>HPV9\_Beta\_9627396\_nt0781\_Genome\_Tile|1  
ATCGTAGCTGGCTGTGGTTGCGGTGCAAGACTTCGTTTATACGTGCTTGCTACAAATTTA  
>HPV9\_Beta\_9627396\_nt0821\_Genome\_Tile|1  
ACGTGCTTGCTACAAATTTAGGAATTCGAGCGCAACAGGAACTTTTGCTGGGTGATATAC  
>HPV9\_Beta\_9627396\_nt1661\_Genome\_Tile|1  
TTAAGCACTTTGCTGCAAGTATCTGAAGTGCAATTATTAAGTGAGCCTCCAAAGTTGCGA  
>HPV9\_Beta\_9627396\_nt1881\_Genome\_Tile|1  
ATCATGAATATTTTGATGAAGCTACCATTGCATATCAATATGCAAAGCTGGCTGAAACAG  
>HPV9\_Beta\_9627396\_nt2061\_Genome\_Tile|1  
TACATAGAAAACCTGCTTACAGTGGAAAGCAATGGGCAATGGTCAGATATAGTACGGTTTA  
>HPV9\_Beta\_9627396\_nt2121\_Genome\_Tile|1  
TTAGATACCAGGATATTAATTTTATTGAATTTCTAACAGTATTTAAAGCATTTCTGCAAA  
>HPV9\_Beta\_9627396\_nt2281\_Genome\_Tile|1  
GTCATTTGCCAATTGCAAAAGTACTTTTTGGCTACAACCTATAGCTGATACTAACTTGC  
>HPV9\_Beta\_9627396\_nt2461\_Genome\_Tile|1  
TCCACCCCTTATGTTAACGTCTAACATAGATATTACTAAAGACCAAAAGTACAAATATTT  
>HPV9\_Beta\_9627396\_nt2501\_Genome\_Tile|1  
GACCAAAAGTACAAATATTTGCACAGCAGAGTTAAATCCTTTGCTTTCAATAACAAATTT  
>HPV9\_Beta\_9627396\_nt2521\_Genome\_Tile|1  
GCACAGCAGAGTTAAATCCTTTGCTTTCAATAACAAATTTCCACTTGATGCTAATCACAA  
>HPV9\_Beta\_9627396\_nt3121\_Genome\_Tile|1  
TTCAAGGTCACGTGGATTATTTTGGAGCCTATTACTTTGAAGGGACTGTAAAAACATATT



>HPV9\_Beta\_9627396\_nt3141\_Genome\_Tile|1  
TTTGGAGCCTATTACTTTGAAGGGACTGTAAAAACATATTATATTAAGTTTGACAAAGAT  
>HPV9\_Beta\_9627396\_nt3161\_Genome\_Tile|1  
AGGGACTGTAAAAACATATTATATTAAGTTTGACAAAGATGCAGCCAGGTATGGCAGAAC  
>HPV9\_Beta\_9627396\_nt3301\_Genome\_Tile|1  
GAGAGACCTCCAAGCACACCCTTTCCAGGTCGGGGTCGCCAACAACATCGCGACTCCCTG  
>HPV9\_Beta\_9627396\_nt3441\_Genome\_Tile|1  
AAAAGACAGAGACAAGGAGAAGGAGAAGGAGAAGGAGAAGGAGAAGAAACCAACTACAGG  
>HPV9\_Beta\_9627396\_nt3481\_Genome\_Tile|1  
GAGAAGAAACCAACTACAGGAGACAAAGGTCCAGATCCAAGGGTCGAACAGAAACCGAAA  
>HPV9\_Beta\_9627396\_nt3921\_Genome\_Tile|1  
GGGGAAGACAGTTGTGATAGAGTTGGAAGAGCGCAATGATTTTAGCCTTTGACACATAT  
>HPV9\_Beta\_9627396\_nt3941\_Genome\_Tile|1  
AGTTGGAAGAGCGCAATGATTTTAGCCTTTGACACATATGAGCACAGACAACAATTCAT  
>HPV9\_Beta\_9627396\_nt3961\_Genome\_Tile|1  
TTTTAGCCTTTGACACATATGAGCACAGACAACAATTCATTAGGACTATGAAATTACCAC  
>HPV9\_Beta\_9627396\_nt3981\_Genome\_Tile|1  
GAGCACAGACAACAATTCATTAGGACTATGAAATTACCACCTACAGTAGATTGGTCTTTA  
>HPV9\_Beta\_9627396\_nt4021\_Genome\_Tile|1  
CTACAGTAGATTGGTCTTTAGGAAATGTTGATGATCTGTAAGCTTTACTAACGCTAACGC  
>HPV9\_Beta\_9627396\_nt4041\_Genome\_Tile|1  
GGAAATGTTGATGATCTGTAAGCTTTACTAACGCTAACGCTGGCATTGCTACTAACCCAT  
>HPV9\_Beta\_9627396\_nt4061\_Genome\_Tile|1  
AGCTTTACTAACGCTAACGCTGGCATTGCTACTAACCCATACTAACTAACAAACCCATAC  
>HPV9\_Beta\_9627396\_nt4541\_Genome\_Tile|1  
TACACCCAGTACCAGTGGACAATGCTGTAGTAGATACTCCAGTTGTAAACAGAAGGTAGAA  
>HPV9\_Beta\_9627396\_nt4561\_Genome\_Tile|1  
AATGCTGTAGTAGATACTCCAGTTGTAACAGAAGGTAGAAGAGGCTCGTCTGCCATTTTA  
>HPV9\_Beta\_9627396\_nt4721\_Genome\_Tile|1  
GTGAATCTTCCTTAGCAGATCATATTATAGTTTTTTGAAGGATCTGGGGGCCAGCTAGTAG  
>HPV9\_Beta\_9627396\_nt4741\_Genome\_Tile|1  
CATATTATAGTTTTTTGAAGGATCTGGGGGCCAGCTAGTAGGTGGTCCTAGGGAATCATA  
>HPV9\_Beta\_9627396\_nt4761\_Genome\_Tile|1  
ATCTGGGGGCCAGCTAGTAGGTGGTCCTAGGGAATCATACACAGCATCTTCTGAAAACAT  
>HPV9\_Beta\_9627396\_nt4781\_Genome\_Tile|1  
GTGGTCCTAGGGAATCATACACAGCATCTTCTGAAAACATAGAATTACAAGAATTTCTTA  
>HPV9\_Beta\_9627396\_nt4881\_Genome\_Tile|1  
GACTAGTACACCTGTCCAAAGAGCAGTACAATCATTATCTAGTCTGCGTAGAGCTCTATA  
>HPV9\_Beta\_9627396\_nt4901\_Genome\_Tile|1  
GAGCAGTACAATCATTATCTAGTCTGCGTAGAGCTCTATATAACAGACGTCTTACAGAAC  
>HPV9\_Beta\_9627396\_nt5181\_Genome\_Tile|1  
CCGAAGAGCAACAATCCGCACACGTAGTGGTGCACAGGTGGGCGCACAGGTTCATTTCTA  
>HPV9\_Beta\_9627396\_nt5381\_Genome\_Tile|1  
AGGTGGGAAGACAGGAAACCCCTTCTGTTGAAGATGTGGATTTTAATTCTGAAGACTTAC  
>HPV9\_Beta\_9627396\_nt5401\_Genome\_Tile|1  
CCTTCTGTTGAAGATGTGGATTTTAATTCTGAAGACTTACTGTTAGATGAGGGTGTAGAA  
>HPV9\_Beta\_9627396\_nt5421\_Genome\_Tile|1  
TTTTAATTCTGAAGACTTACTGTTAGATGAGGGTGTAGAAGATTTTAGTGGGTCTCAGCT  
>HPV9\_Beta\_9627396\_nt5541\_Genome\_Tile|1  
GGACACTAGTTTTTATATTACAGGATATACAAGGCTACACAGTGTCTATCCCGAGTCTAG  
>HPV9\_Beta\_9627396\_nt5561\_Genome\_Tile|1  
AGGATATACAAGGCTACACAGTGTCTATCCCGAGTCTAGACAAACCACAGATATAATTT  
>HPV9\_Beta\_9627396\_nt5601\_Genome\_Tile|1  
ACAAACCACAGATATAATTTTTCCACATCCTGACACCCCCACAGTAGTAATCCACATCAA  
>HPV9\_Beta\_9627396\_nt5641\_Genome\_Tile|1

ACAGTAGTAATCCACATCAATGATACATCAGGAGATTATTATTTACACCCAAGTCTCCAA  
>HPV9\_Beta\_9627396\_nt5861\_Genome\_Tile|1  
TAGTGACCGTTTGCTAACAGTGGGTCATCCATATTATGATGTCCGCTCAGGCGACGGACA  
>HPV9\_Beta\_9627396\_nt5901\_Genome\_Tile|1  
GTCCGCTCAGGCGACGGACAAAGGATTGAAGTCCCTAAAGTGTCTGGTAATCAGTATCGG  
>HPV9\_Beta\_9627396\_nt6241\_Genome\_Tile|1  
GAGAACACTGGGATAAAGCCAAAGTGTGTGAAAAGGATGCTAATAATCAACTAGGCTTAT  
>HPV9\_Beta\_9627396\_nt6261\_Genome\_Tile|1  
AAAGTGTGTGAAAAGGATGCTAATAATCAACTAGGCTTATGTCCTCCTATAGAATTAAGA  
>HPV9\_Beta\_9627396\_nt6541\_Genome\_Tile|1  
GTTTCAGTTGGTGACGCTGTTCTTGATGGTGCAGTAAACCAGGATCATAATTTCTTTTTGC  
>HPV9\_Beta\_9627396\_nt6601\_Genome\_Tile|1  
CAGCAAAAAGTGATCAACAACAACGAACAATAGCTAATTCACCTACTATCCTACAGTAA  
>HPV9\_Beta\_9627396\_nt6621\_Genome\_Tile|1  
CAACGAACAATAGCTAATTCACCTACTATCCTACAGTAAGTGGGTCATTAGTAACTTCA  
>HPV9\_Beta\_9627396\_nt6781\_Genome\_Tile|1  
ATACACGTAAACACCAATTTTACCATTAGTGTGTCTACAGAGGCAGCTCAAACAGAAGAAT  
>HPV9\_Beta\_9627396\_nt6801\_Genome\_Tile|1  
ACCATTAGTGTGTCTACAGAGGCAGCTCAAACAGAAGAATATAATGCCAATAATATTAGA  
>HPV9\_Beta\_9627396\_nt7021\_Genome\_Tile|1  
ATGATATCTACAGATATATTGATTCAAAGCCACAAAATGCCCAGATGCTGTTGAGCCTA  
>HPV9\_Beta\_9627396\_nt7181\_Genome\_Tile|1  
TCTTTTTTCAAGCTGGTTTGCAAACACGAAAACGTCCTATTAAAACATCTGTAAAAACATC  
>HPV9\_Beta\_9627396\_nt7201\_Genome\_Tile|1  
AAACACGAAAACGTCCTATTAAAACATCTGTAAAAACATCTAAAAATGCTAAGAGAAGGC  
>HPV9\_Beta\_9627396\_nt7241\_Genome\_Tile|1  
TAAAAATGCTAAGAGAAGGCGAACCTAACCGATATCGGTTTCCAATAAAAATTTAAGTTAT  
>HPV111\_Beta\_186461202\_nt0201\_Genome\_Tile|1  
CTAGCAATTCCTGTAATAGATTTATTATTACCATGCAACTTTTGCAATAGATTCTTATCT  
>HPV111\_Beta\_186461202\_nt0221\_Genome\_Tile|1  
TTTATTATTACCATGCAACTTTTGCAATAGATTCTTATCTTACTTTGAGTTGCTGAGTTT  
>HPV111\_Beta\_186461202\_nt0241\_Genome\_Tile|1  
TTTGCAATAGATTCTTATCTTACTTTGAGTTGCTGAGTTTTGATTATAAGTATTTGCAAC  
>HPV111\_Beta\_186461202\_nt0261\_Genome\_Tile|1  
TACTTTGAGTTGCTGAGTTTTGATTATAAGTATTTGCAACTGATATGGACTGTTGAAGAC  
>HPV111\_Beta\_186461202\_nt0281\_Genome\_Tile|1  
TGATTATAAGTATTTGCAACTGATATGGACTGTTGAAGACTTAGTATATGCTATATGTAG  
>HPV111\_Beta\_186461202\_nt0341\_Genome\_Tile|1  
TAGTTGTGCTTTTGCTTCAGCACAGTTTGAATTTATGAAATATTTTGAATACTCTGTTGT  
>HPV111\_Beta\_186461202\_nt0361\_Genome\_Tile|1  
CACAGTTTGAATTTATGAAATATTTTGAATACTCTGTTGTAGGAAAAACAGATAGAACTG  
>HPV111\_Beta\_186461202\_nt0381\_Genome\_Tile|1  
TATTTTGAATACTCTGTTGTAGGAAAACAGATAGAACTGTAGCAAACCAGCCTATTGGA  
>HPV111\_Beta\_186461202\_nt0421\_Genome\_Tile|1  
TAGCAAACCAGCCTATTGGAAATATTACTGTTAGGTGTCAATATTGTTTGAAAAAATTGG  
>HPV111\_Beta\_186461202\_nt0441\_Genome\_Tile|1  
AATATTACTGTTAGGTGTCAATATTGTTTGAAAAAATTGGATCTGGTAGAGAAGCTAGGA  
>HPV111\_Beta\_186461202\_nt0461\_Genome\_Tile|1  
ATATTGTTTGAAAAAATTGGATCTGGTAGAGAAGCTAGGAGTGTGCTACAAACAACAATA  
>HPV111\_Beta\_186461202\_nt0501\_Genome\_Tile|1  
GTGTGCTACAAACAACAATATTTTCATAGAGTTAGGGATAATTGGAAAGGATTGTGCAGA  
>HPV111\_Beta\_186461202\_nt0701\_Genome\_Tile|1  
ACTCCTTACAAAATTGTAGTTGCTTGCAATTGTGGTACAAGACTTCGCTTATACGTCTTT  
>HPV111\_Beta\_186461202\_nt0741\_Genome\_Tile|1  
GACTTCGCTTATACGTCTTTGCTACGGAACCTGGAATAAGAGCCCCAACAAAGAACTATTAC

>HPV111\_Beta\_186461202\_nt0761\_Genome\_Tile|1  
GCTACGGAACCTTGAATAAGAGCCCAACAAGAACTATTACTGGGTGAAGTACAGCTTGTG  
>HPV111\_Beta\_186461202\_nt1301\_Genome\_Tile|1  
GGAGATTGTAAAAGAATTACTTAAATCTAATAATGTGAAAGCTGTGTTACTGGCTAAATT  
>HPV111\_Beta\_186461202\_nt1421\_Genome\_Tile|1  
ATGTTGTAGAGATTGGGTAATTAGTATTTATGCAGCTAATGGCGATCTTGTAGAAGGTTT  
>HPV111\_Beta\_186461202\_nt1441\_Genome\_Tile|1  
TTAGTATTTATGCAGCTAATGGCGATCTTGTAGAAGGTTCTAAGCAATTGTTGATACAGC  
>HPV111\_Beta\_186461202\_nt1581\_Genome\_Tile|1  
ACTGTACTACGATTATTAAGCACAAATATTACAAGTATCAGAAGTGCAGGTATTGGCAGAT  
>HPV111\_Beta\_186461202\_nt1601\_Genome\_Tile|1  
CACAATATTACAAGTATCAGAAGTGCAGGTATTGGCAGATCCTCTAAATTGCGCAGCGT  
>HPV111\_Beta\_186461202\_nt1701\_Genome\_Tile|1  
AATGTGTATGCTCACGGTACATACCCAGATTGGATATTAGCACAAACAATGATCAATCAT  
>HPV111\_Beta\_186461202\_nt1921\_Genome\_Tile|1  
TTGTCAGGGAATGTGCTACTATGGTAAGACATTATATTCGAGGGGAGATGCGAGAGATGA  
>HPV111\_Beta\_186461202\_nt2061\_Genome\_Tile|1  
TATCAAGGAATAAATTTTATAGATTTTCTTCTGTATTTACTAAGTTTTTACATAATAGG  
>HPV111\_Beta\_186461202\_nt2101\_Genome\_Tile|1  
CTAAGTTTTTACATAATAGGCCCTAAGCAAACTGCATATTGCTTCATGGACCACCAGATA  
>HPV111\_Beta\_186461202\_nt2161\_Genome\_Tile|1  
CTGGTAAATCTATGTTTACCATGTCTCTCATTAATGTTCTTAAAGGTAAAGTGCTCTCTT  
>HPV111\_Beta\_186461202\_nt2181\_Genome\_Tile|1  
ATGTCTCTCATTAATGTTCTTAAAGGTAAAGTGCTCTCTTTTTGCAAATTGTAGAAGTACT  
>HPV111\_Beta\_186461202\_nt2301\_Genome\_Tile|1  
TGTTGGGATTATATTGATAATTATTTGCGTAATGGATTAGATGGCAATGTTGTCTGTTTA  
>HPV111\_Beta\_186461202\_nt2361\_Genome\_Tile|1  
GACATAAAACATAGAGCACCTTGTCAAGTAAAATTTCCCCACTATTATTAACATCAAAC  
>HPV111\_Beta\_186461202\_nt2381\_Genome\_Tile|1  
TTGTCAAGTAAAATTTCCCCACTATTATTAACATCAAACATAGATATATCCAAGGAGCA  
>HPV111\_Beta\_186461202\_nt2441\_Genome\_Tile|1  
GAAGCATAAATATTTACATAGCAGAATTAAATGCTTTGCTTTTACTAACAAGTTCCCTT  
>HPV111\_Beta\_186461202\_nt2701\_Genome\_Tile|1  
ACATTGGCAAGCATTGAGACAAGAGCAAGTTTTATTGTACTTTGCTCGAAAAAATGGAGT  
>HPV111\_Beta\_186461202\_nt2961\_Genome\_Tile|1  
AAGTAATCTTTGATGGCGATCCAGAGAATCTAATGAGCTATACAGTATGGAAAGATATAT  
>HPV111\_Beta\_186461202\_nt2981\_Genome\_Tile|1  
CCAGAGAATCTAATGAGCTATACAGTATGGAAAGATATATATTATCAAACCTGTGACTGAC  
>HPV111\_Beta\_186461202\_nt3061\_Genome\_Tile|1  
CCAAGTGGATTATTTTCGAGCCTTTTATTTTGAAGGGGCTTTGAAAACCTTATTATATTGA  
>HPV111\_Beta\_186461202\_nt3221\_Genome\_Tile|1  
CCTGGAGACGGGGCCAGTGGAGAGGCCTCCGGCAACACCTCATCCAGGCCGCAATCACCA  
>HPV111\_Beta\_186461202\_nt3361\_Genome\_Tile|1  
CACCACCACGCGGCAAGAAAGACAAAGAAAAAGACAAAAGCCATTACAAGGAAATCAAG  
>HPV111\_Beta\_186461202\_nt3841\_Genome\_Tile|1  
AGTAGGCAGATCTAGAATGCTTTTAGCTTTTGATACATACAAACATCGAGAACAGTTTAT  
>HPV111\_Beta\_186461202\_nt3861\_Genome\_Tile|1  
TTTTAGCTTTTGATACATACAAACATCGAGAACAGTTTATCACTACTATGAAATTACCAC  
>HPV111\_Beta\_186461202\_nt3921\_Genome\_Tile|1  
CTAAGGTAGACTGGTCATTTGGACATTTAGATGATTTATAATTTACTTACTAATTATGC  
>HPV111\_Beta\_186461202\_nt3961\_Genome\_Tile|1  
ATTTACTTACTAATTATGCATTGCTACTAACACACTAACAAATAATGGCTAGGGCAAAA  
>HPV111\_Beta\_186461202\_nt4281\_Genome\_Tile|1  
TCCAGAGGTAATAGGCCCTGCAGAGTTAATACCTATAGACACAGTCAGACCCATTGACCC  
>HPV111\_Beta\_186461202\_nt4621\_Genome\_Tile|1

ATTGTGTTTGAAGGCTCTGGAGGACAGTTGGTTGGAGGTGCTCGAGAACCCTCCATAGTT  
>HPV111\_Beta\_186461202\_nt4641\_Genome\_Tile|1  
AGGACAGTTGGTTGGAGGTGCTCGAGAACCCTCCATAGTTACTGAAACTATAGAAGTACA  
>HPV111\_Beta\_186461202\_nt4661\_Genome\_Tile|1  
CTCGAGAACCCTCCATAGTTACTGAAACTATAGAAGTACAAGAATTACCTTCTAGATACA  
>HPV111\_Beta\_186461202\_nt4781\_Genome\_Tile|1  
AATCACTTAGTACTTTAAGAAGAGCACTGTACAATAGACGTTTGACAGAGCAGGTAGCTG  
>HPV111\_Beta\_186461202\_nt4801\_Genome\_Tile|1  
AGAGCACTGTACAATAGACGTTTGACAGAGCAGGTAGCTGTAAGTACCCCTTTATTCTTA  
>HPV111\_Beta\_186461202\_nt4821\_Genome\_Tile|1  
TTTGACAGAGCAGGTAGCTGTAAGTACCCCTTTATTCTTAACAAAACCTTCACGTCTTGT  
>HPV111\_Beta\_186461202\_nt4841\_Genome\_Tile|1  
TAACTGACCCCTTTATTCTTAACAAAACCTTCACGTCTTGTACACTTTCAGTTTGATAATC  
>HPV111\_Beta\_186461202\_nt5121\_Genome\_Tile|1  
AAGTAGCATTAACACTGAAGCACCAATAGAAATGGAATTATTAGGTGAACATTCTGGAGA  
>HPV111\_Beta\_186461202\_nt5161\_Genome\_Tile|1  
TTAGGTGAACATTCTGGAGATAGCACTATTTTCAAGGACCAGTAGAGAGTTCTTTAGTA  
>HPV111\_Beta\_186461202\_nt5181\_Genome\_Tile|1  
TAGCACTATTTTCAAGGACCAGTAGAGAGTTCTTTAGTAGATGTTAATATTGATGAACC  
>HPV111\_Beta\_186461202\_nt5241\_Genome\_Tile|1  
TGACGCCTTGGTTGTAGGCAGACCGGAAACCCCTCCATTAGAAGATGAAATAGATTTTAA  
>HPV111\_Beta\_186461202\_nt5281\_Genome\_Tile|1  
GAAGATGAAATAGATTTTAAATTCAGAAGATTTGTTATTGGAGGAAGGGGTAGAAGATTTT  
>HPV111\_Beta\_186461202\_nt5301\_Genome\_Tile|1  
TTCAGAAGATTTGTTATTGGAGGAAGGGGTAGAAGATTTTAGTGGCTCACAACTTGTAGT  
>HPV111\_Beta\_186461202\_nt5321\_Genome\_Tile|1  
AGGAAGGGGTAGAAGATTTTAGTGGCTCACAACTTGTAGTAGGTACTAGGCGAAGCACAA  
>HPV111\_Beta\_186461202\_nt5341\_Genome\_Tile|1  
AGTGGCTCACAACTTGTAGTAGGTACTAGGCGAAGCACAAATACATTAACAGTTCCCCGC  
>HPV111\_Beta\_186461202\_nt5481\_Genome\_Tile|1  
TGAAAATATTATTTTCTCATCCAGAAGCTCCACAGTTGTGATTACATATCAGATAC  
>HPV111\_Beta\_186461202\_nt5501\_Genome\_Tile|1  
ATCCAGAAGCTCCACAGTTGTGATTACATATCAGATACTTCTGGTGATTATTATTTAC  
>HPV111\_Beta\_186461202\_nt6301\_Genome\_Tile|1  
AAGTATGTAAATACCCTGACTTCCTAACTATGGCTAATGACGTCTATGGGGACGCTTGT  
>HPV111\_Beta\_186461202\_nt6421\_Genome\_Tile|1  
TAGGAGATGCAATTCCAGATGCAGCAGTGCACAAAATCACAATTATTATCTGCCAGCAC  
>HPV111\_Beta\_186461202\_nt6461\_Genome\_Tile|1  
CAATTATTATCTGCCAGCACAGGGTAATCAACAACAAAACATTTTGGGTAAGTCCATTTA  
>HPV111\_Beta\_186461202\_nt6641\_Genome\_Tile|1  
AACAGTAGCAGATAATACCAGAAACACTAATTTTACTATAAGCGTATCCACAGAAGCTAA  
>HPV111\_Beta\_186461202\_nt6661\_Genome\_Tile|1  
GAAACACTAATTTTACTATAAGCGTATCCACAGAAGCTAATGCACAGCAATATAATGCTA  
>HPV111\_Beta\_186461202\_nt6741\_Genome\_Tile|1  
AGACATGTAGAAGAATATCAATTGTCTTTGATTCTTCAACTATGTAAAGTTTCTTTAGTT  
>HPV111\_Beta\_186461202\_nt6761\_Genome\_Tile|1  
ATTGTCTTTGATTCTTCAACTATGTAAAGTTTCTTTAGTTCCAGAAGTTTATCTCAAAT  
>HPV111\_Beta\_186461202\_nt7061\_Genome\_Tile|1  
GGCTGGTTTACAAACACGAAACGGACTTTAAACCTTCGTCTGTGAAATCTACTAAATC  
>HPV111\_Beta\_186461202\_nt7081\_Genome\_Tile|1  
AACGGACTTTAAACCTTCGTCTGTGAAATCTACTAAATCTGCAAAACGCAGACGCACCT  
>HPV110\_Beta\_186461194\_nt0081\_Genome\_Tile|1  
TTATAGCTACATGTAACCGCATGCGTTACAATTTAGGTACATCTACATAAATATATTTCT  
>HPV110\_Beta\_186461194\_nt0201\_Genome\_Tile|1  
ACAGCTTGCAGATACATTATGCATTCTGTTTTAGACATATTAATACCGTGTAGATTTTG

>HPV110\_Beta\_186461194\_nt0221\_Genome\_Tile|1  
GCATTCCTGTTTTAGACATATTAATACCGTGTAGATTTTGTACTAGGTTTTATCATATA  
>HPV110\_Beta\_186461194\_nt0241\_Genome\_Tile|1  
TTAATACCGTGTAGATTTTGTACTAGGTTTTATCATATATAGAATTATTAGGTTTTGAT  
>HPV110\_Beta\_186461194\_nt0261\_Genome\_Tile|1  
TACTAGGTTTTATCATATATAGAATTATTAGGTTTTGATTATAAAGGGTTACAACCTTAT  
>HPV110\_Beta\_186461194\_nt0381\_Genome\_Tile|1  
ATATGAATTTACAAGGTTTTATGAACATTCTGTAAATGGACGTGAAATAGAAATAGTAGA  
>HPV110\_Beta\_186461194\_nt0401\_Genome\_Tile|1  
ATGAACATTCTGTAAATGGACGTGAAATAGAAATAGTAGAGCAAAAAGGAATTGGGGAAG  
>HPV110\_Beta\_186461194\_nt0461\_Genome\_Tile|1  
TGGTTGTGCGTTGCCAATATTGTTTAAACCGTCTAGATCTAATAGAGAAGCTAGAAGTTT  
>HPV110\_Beta\_186461194\_nt0481\_Genome\_Tile|1  
TGTTTAAACGTCCTAGATCTAATAGAGAAGCTAGAAGTTTGTGTGAAGCATCAGCAATTT  
>HPV110\_Beta\_186461194\_nt0741\_Genome\_Tile|1  
GCTTGTGGCCTTTGTGGTGCAGCTTCCGGCTTTTTGTGCTTGCAACAGTTTTTGAATT  
>HPV110\_Beta\_186461194\_nt0781\_Genome\_Tile|1  
TTGCAACAGTTTTTGAATTTCGTACTCAGCAAGAAATTTGCTTGGTGAAGTACAGCTGC  
>HPV110\_Beta\_186461194\_nt1341\_Genome\_Tile|1  
CTTACTTAAATGCAGCAATGTAAAGGCTGTATTATTGGCCAAATTTAAGGAATCATTTGG  
>HPV110\_Beta\_186461194\_nt1601\_Genome\_Tile|1  
GAGACACTGTTTGTAGATTGCTAATGAGTCTCTTGCAAATTGGAGAGATTCAATTAATAG  
>HPV110\_Beta\_186461194\_nt1621\_Genome\_Tile|1  
CTAATGAGTCTCTTGCAAATTGGAGAGATTCAATTAATAGCTGAGCCACCAAAGTTAAGA  
>HPV110\_Beta\_186461194\_nt2061\_Genome\_Tile|1  
GTCGCATATAGTTAAATTTTTACGGTTTCAGGAAATTAATTTTATTTACTTTCTTGATGT  
>HPV110\_Beta\_186461194\_nt2081\_Genome\_Tile|1  
TACGGTTTCAGGAAATTAATTTTATTTACTTTCTTGATGTATTTAAAGCTTTTTTGCATA  
>HPV110\_Beta\_186461194\_nt2121\_Genome\_Tile|1  
ATTTAAAGCTTTTTTGCATAATACTCCTAAACAAAATTTGTATACTAATACATGGACCTCC  
>HPV110\_Beta\_186461194\_nt2341\_Genome\_Tile|1  
GATAAATATCTTAGAAATGTATTAGATGGGAATGTTGTTTGTCTGGATATGAAACATAAA  
>HPV110\_Beta\_186461194\_nt2361\_Genome\_Tile|1  
ATTAGATGGGAATGTTGTTTGTCTGGATATGAAACATAAAGCTCCATGCCAATTAAATTT  
>HPV110\_Beta\_186461194\_nt2401\_Genome\_Tile|1  
GCTCCATGCCAATTAAATTTTCTCCTTTATTATTAAACATCCAATATGGATATAATGAAA  
>HPV110\_Beta\_186461194\_nt2781\_Genome\_Tile|1  
ATGGCATAATGAGATTGGGGTATCAGTTGGTACCACCATTAGCTACCAGTGAAGCTAAAG  
>HPV110\_Beta\_186461194\_nt2881\_Genome\_Tile|1  
GCAAAGGTCTCCTTATGCTTCTGAGTCATGGACATTAATGCAGACTAGTTTGAAGCAGT  
>HPV110\_Beta\_186461194\_nt3001\_Genome\_Tile|1  
CAGTGATCCAGAGAATCTAATGTCATACACATTATGGTCATTCATTTATTATCAAAGAGT  
>HPV110\_Beta\_186461194\_nt3021\_Genome\_Tile|1  
TGTCATACACATTATGGTCATTCATTTATTATCAAAGAGTAGATGATACTTGAACAAAG  
>HPV110\_Beta\_186461194\_nt3301\_Genome\_Tile|1  
ATCAACCGTCGCGCGACGGTCTGCCTCCCCCTGCCACCCGAACCACCACACAACGGTC  
>HPV110\_Beta\_186461194\_nt3501\_Genome\_Tile|1  
GGGATCGACGCAGAAGGAGGGGAGGAGACTCCTCCACCAGGAGCCACTCCTCCAACAGGG  
>HPV110\_Beta\_186461194\_nt3601\_Genome\_Tile|1  
CCAATCTCGCTCCAAATCAAGGTCGAGATCCAGAGGCCCTTCTACCAGGCGTGGCGTCTC  
>HPV110\_Beta\_186461194\_nt3761\_Genome\_Tile|1  
TTGCGCGGCGCTGCTAACACCTTAAAGTGCTATCGCTACAGAGCTAAAAAGAAGTATAGT  
>HPV110\_Beta\_186461194\_nt3781\_Genome\_Tile|1  
CTTAAAGTGCTATCGCTACAGAGCTAAAAAGAAGTATAGTGCTTTAGTGAAATACCTTTAG  
>HPV110\_Beta\_186461194\_nt3801\_Genome\_Tile|1

GAGCTAAAAAGAAGTATAGTGCTTTAGTGAAATACTTTAGCACTACATGGTCTTGGGTTG  
>HPV110\_Beta\_186461194\_nt3861\_Genome\_Tile|1  
GGGGCGACAATAATGATAGAATAGGGCGTGCTAGAATGCTATTAGCTTTAGCTCAAATA  
>HPV110\_Beta\_186461194\_nt4481\_Genome\_Tile|1  
CAGATAATGTGCCAGTAGACACACCAGTTGTTTCAGGTGGCCGCGGTTCTGCAGCTGTAC  
>HPV110\_Beta\_186461194\_nt4501\_Genome\_Tile|1  
ACACCAGTTGTTTCAGGTGGCCGCGGTTCTGCAGCTGTACTAGAAAGTTGCAGATCCTAGC  
>HPV110\_Beta\_186461194\_nt4621\_Genome\_Tile|1  
ACAGAATCTACACCATTGCTAGGCGAATCTTCTATGGCAGATCATGTTTTAGTATTTGAA  
>HPV110\_Beta\_186461194\_nt4661\_Genome\_Tile|1  
ATCATGTTTTAGTATTTGAAGGTGCAGGTGGACAAAGTATTGGTGGCACTAGACAGGCTG  
>HPV110\_Beta\_186461194\_nt4701\_Genome\_Tile|1  
TGGTGGCACTAGACAGGCTGCCATTGATACAGCACAGGAAAGTATTGAGCTACAATCATG  
>HPV110\_Beta\_186461194\_nt5021\_Genome\_Tile|1  
ATAGACAATTTTTAGATGTGGTAAGATTAGGCCGTCCACAGTCGCTGAAACACCTCAAG  
>HPV110\_Beta\_186461194\_nt5041\_Genome\_Tile|1  
GTAAGATTAGGCCGTCCACAGTCGCTGAAACACCTCAAGGTTATTTAAGAGTCAGTCGG  
>HPV110\_Beta\_186461194\_nt5081\_Genome\_Tile|1  
GTTATTTAAGAGTCAGTCGGCTTGGACGGCGTGCAACCATTAGAACTCGCAGTGGTGCTC  
>HPV110\_Beta\_186461194\_nt5101\_Genome\_Tile|1  
CTTGGACGGCGTGCAACCATTAGAACTCGCAGTGGTGCTCAAGTAGGAACACAAGTACAC  
>HPV110\_Beta\_186461194\_nt5161\_Genome\_Tile|1  
TTTTACAGAGATTTAAGCACAAATTGATTCTGAAGCTCCTATTGAAATGCAAATACCTGGT  
>HPV110\_Beta\_186461194\_nt5261\_Genome\_Tile|1  
AAAGTTCCTTTTGTAGATGTTAATATAGACGAGCCAGATCCTTTAAATGTTGGGCAGTTTG  
>HPV110\_Beta\_186461194\_nt5281\_Genome\_Tile|1  
AATATAGACGAGCCAGATCCTTTAAATGTTGGGCAGTTTGAATCAATGGAAATAGAAGAA  
>HPV110\_Beta\_186461194\_nt5301\_Genome\_Tile|1  
TTTAAATGTTGGGCAGTTTGAATCAATGGAAATAGAAGAACCAGATTATAATTCTGCTGA  
>HPV110\_Beta\_186461194\_nt5321\_Genome\_Tile|1  
AATCAATGGAAATAGAAGAACCAGATTATAATTCTGCTGATTTTTTTACTAGATGACCATG  
>HPV110\_Beta\_186461194\_nt5361\_Genome\_Tile|1  
TTTTTTTACTAGATGACCATGTAGATGATTTTAGTGGTTCACAATTGGTATTTGGAAATCC  
>HPV110\_Beta\_186461194\_nt5481\_Genome\_Tile|1  
TTATATACAAGATATTCAAGGCCATACTGTTGCTTACCCAGAATCTAGAGACAACACTGA  
>HPV110\_Beta\_186461194\_nt5521\_Genome\_Tile|1  
GAATCTAGAGACAACACTGAAATTATACTCCCCTACCTGATACTCCAACCTGTGGTCATA  
>HPV110\_Beta\_186461194\_nt5541\_Genome\_Tile|1  
AATTATACTCCCCTACCTGATACTCCAACCTGTGGTCATACACATCAGTGACACTAGTGG  
>HPV110\_Beta\_186461194\_nt7161\_Genome\_Tile|1  
AAGGTCTCTAAGGTACCAAACGCAAACGGTCGTGACCGATATCGGTGTCAATAAATTTT  
>HPV110\_Beta\_186461194\_nt7201\_Genome\_Tile|1  
TATCGGTGTCAATAAATTTTATAACCAATCTGGTATGTGAAGTATGTTTTTTACCGTGTT  
>HPV107\_Beta\_126131393\_nt0081\_Genome\_Tile|2  
GCCAAAAGTCTGCCAAGTTTTCTTGGCAGAACATCCATTTGGCTGCAACTGTCACCGATA  
>HPV107\_Beta\_126131393\_nt0101\_Genome\_Tile|1  
TCTTGGCAGAACATCCATTTGGCTGCAACTGTCACCGATAACGGTAAGTATTTGTTTTGA  
>HPV107\_Beta\_126131393\_nt0141\_Genome\_Tile|1  
ACGGTAAGTATTTGTTTTGAGCACCGGTGCCGTTGCTAAATTACTCATATGGTGATTGT  
>HPV107\_Beta\_126131393\_nt0201\_Genome\_Tile|1  
GGTTTACAACCATCATCTTGACATATTACATGTAACCGCATGTGTAGTATCTAATATAAA  
>HPV107\_Beta\_126131393\_nt0221\_Genome\_Tile|1  
ACATATTACATGTAACCGCATGTGTAGTATCTAATATAAAAATATTTTGTGCTTCTACAA  
>HPV107\_Beta\_126131393\_nt0241\_Genome\_Tile|1  
TGTGTAGTATCTAATATAAAAATATTTTGTGCTTCTACAACCTGTTTCAGATGCTCATGGAC

>HPV107\_Beta\_126131393\_nt0261\_Genome\_Tile|1  
AATATTTTGTGCTTCTACAACCTGTTTCAGATGCTCATGGACAGGCCAAGGACAATCGTACA  
>HPV107\_Beta\_126131393\_nt0281\_Genome\_Tile|1  
CTGTTTCAGATGCTCATGGACAGGCCAAGGACAATCGTACAGCTTACACAGCATCTTAATA  
>HPV107\_Beta\_126131393\_nt0301\_Genome\_Tile|1  
AGGCCAAGGACAATCGTACAGCTTACACAGCATCTTAATATACCAGTGAAGACTTACTG  
>HPV107\_Beta\_126131393\_nt0321\_Genome\_Tile|1  
GCTTACACAGCATCTTAATATACCAGTGAAGACTTACTGGTACCTTGCAAATTTTGCAA  
>HPV107\_Beta\_126131393\_nt0341\_Genome\_Tile|1  
TACCAGTGAAGACTTACTGGTACCTTGCAAATTTTGCAAACGATTCTTAACCTTTTATAG  
>HPV107\_Beta\_126131393\_nt0381\_Genome\_Tile|1  
ACGATTCTTAACCTTTTATAGAACTTTTACAATTTGATTATAAAAAATTTACAATTAATTTG  
>HPV107\_Beta\_126131393\_nt0401\_Genome\_Tile|1  
AACTTTTACAATTTGATTATAAAAAATTTACAATTAATTTGGCATGAAAAATTTAGTATATG  
>HPV107\_Beta\_126131393\_nt0461\_Genome\_Tile|1  
GTTGTTGTTGCAGCTGTGCTTATGCATCAGCAGCGTTTGAATTTAAAAATCATTTTGAAT  
>HPV107\_Beta\_126131393\_nt0481\_Genome\_Tile|1  
TATGCATCAGCAGCGTTTGAATTTAAAAATCATTTTGAATTTCAGGTTGTAGGTAAGCAG  
>HPV107\_Beta\_126131393\_nt0501\_Genome\_Tile|1  
ATTTAAAAATCATTTTGAATTTCAGGTTGTAGGTAAGCAGATTGAGGAGATCACTCAGCA  
>HPV107\_Beta\_126131393\_nt0521\_Genome\_Tile|1  
TTCAGGTTGTAGGTAAGCAGATTGAGGAGATCACTCAGCAAAGTATTGGATTATTAATA  
>HPV107\_Beta\_126131393\_nt0541\_Genome\_Tile|1  
ATTGAGGAGATCACTCAGCAAAGTATTGGATTATTAATATTAGATGTGTGTTTTGTTTA  
>HPV107\_Beta\_126131393\_nt0901\_Genome\_Tile|1  
GTCTCTACGTTTTTGCACCCATTTTGGCATTTCGGGCATTGCAGGATCTTTTGCTTCAAG  
>HPV107\_Beta\_126131393\_nt0921\_Genome\_Tile|1  
CATTTTGGCATTTCGGGCATTGCAGGATCTTTTGCTTCAAGAAGTCCAACCTGATCTGTCCA  
>HPV107\_Beta\_126131393\_nt1441\_Genome\_Tile|1  
AAGGGAGTGGGAGAGATGCATTTTAAACAGCTGTTAAATCTAGTAATGTTAAAGCTACT  
>HPV107\_Beta\_126131393\_nt1461\_Genome\_Tile|1  
TTTTTAAACAGCTGTTAAATCTAGTAATGTTAAAGCTACTTTAATGGGAAAATTTAAGGA  
>HPV107\_Beta\_126131393\_nt1561\_Genome\_Tile|1  
AAGAGCAATAAGACGTGTTGCAAAGATTGGGTTGTAACCATATACTGTGTTCAAGATGAT  
>HPV107\_Beta\_126131393\_nt1581\_Genome\_Tile|1  
CAAAGATTGGGTTGTAACCATATACTGTGTTCAAGATGATTTATTAGAAGCTTCTAAGAT  
>HPV107\_Beta\_126131393\_nt1641\_Genome\_Tile|1  
ATTGTTACAAAAACATTGTAATTATATATGGATGCATGTACTACAGCCTATGACATTATA  
>HPV107\_Beta\_126131393\_nt1741\_Genome\_Tile|1  
TGTAGATTATTAAAGTTCCATTCTGCAAATTGATGATATGCAGGCATTATTAGAGCCTCCC  
>HPV107\_Beta\_126131393\_nt1861\_Genome\_Tile|1  
TATTCATTTGGTACGTATCCAGACTGGATAGTAGCTCAAACCTATGATAAGTCATCAAGCA  
>HPV107\_Beta\_126131393\_nt1881\_Genome\_Tile|1  
AGACTGGATAGTAGCTCAAACCTATGATAAGTCATCAAGCAGCAGAGGCTACACAGTTTTTC  
>HPV107\_Beta\_126131393\_nt2241\_Genome\_Tile|1  
TTTGGATAAAATTCGTACGTTTTTAAAGAATACTCCAAAAAGAAATTGTATGTGCTTTTA  
>HPV107\_Beta\_126131393\_nt2261\_Genome\_Tile|1  
TTTTTAAAGAATACTCCAAAAAGAAATTGTATGTGCTTTTATGGTCCACCAGATTCTGGTA  
>HPV107\_Beta\_126131393\_nt2321\_Genome\_Tile|1  
AATCTATGTTTACTATGTCCTTAATAAATGATTGAAAGGAAGAGTACTTTCCTTTTGCAA  
>HPV107\_Beta\_126131393\_nt2341\_Genome\_Tile|1  
TTAATAAATGTATTGAAAGGAAGAGTACTTTCCTTTTGCAAACCTCCAGAAGCCAGTTTTGG  
>HPV107\_Beta\_126131393\_nt2421\_Genome\_Tile|1  
TAAGCTTGCTTTTGCTAGATGATGCTACACAAGAATGCTGGAATTATATTGATACATTTTT  
>HPV107\_Beta\_126131393\_nt2481\_Genome\_Tile|1

AAGAAATGGTGTAGATGGTAATTATGTATCTTTAGACATTAAACACAGGGCTCCGTTACA  
>HPV107\_Beta\_126131393\_nt2501\_Genome\_Tile|1  
ATTATGTATCTTTAGACATTAAACACAGGGCTCCGTTACAGATCAAATTCCTCCATTAA  
>HPV107\_Beta\_126131393\_nt2561\_Genome\_Tile|1  
TGATTACCACAAATATGAATATACTAAAGGAGGAAAAGTACAGGTATCTACATACTAGAA  
>HPV107\_Beta\_126131393\_nt2581\_Genome\_Tile|1  
ATACTAAAGGAGGAAAAGTACAGGTATCTACATACTAGAATAGAATTTTTTTGAATTCCTCA  
>HPV107\_Beta\_126131393\_nt2601\_Genome\_Tile|1  
CAGGTATCTACATACTAGAATAGAATTTTTTTGAATTCCTCAACAAATTTCCATTTGATAA  
>HPV107\_Beta\_126131393\_nt2621\_Genome\_Tile|1  
TAGAATTTTTTTGAATTCCTCAACAAATTTCCATTTGATAATAATAACAAGCCACAATTTT  
>HPV107\_Beta\_126131393\_nt2901\_Genome\_Tile|1  
TTGCTAGGCGAAATGGTATTTTGCAGACTGGGATATCAACCAGTCCCAAGTCTTGCAACTT  
>HPV107\_Beta\_126131393\_nt3001\_Genome\_Tile|1  
GTTACAAAGTTTGCAGAACTCCAAATATGCCGAGGAAACATGGAGTTTGGTGCAAACTAG  
>HPV107\_Beta\_126131393\_nt3101\_Genome\_Tile|1  
AAGGAACCACAGACTATTGAAGTGGTGGTTGATGGAGATCCTGAAAATCGTATGATATAC  
>HPV107\_Beta\_126131393\_nt3141\_Genome\_Tile|1  
CTGAAAATCGTATGATATACAGTATGGAAGTGGATTTATTTTCAGAATACAGAGGACA  
>HPV107\_Beta\_126131393\_nt3161\_Genome\_Tile|1  
ACAGTATGGAAGTGGATTTATTTTCAGAATACAGAGGACATATGGCAAAAAGTTAAAGGA  
>HPV107\_Beta\_126131393\_nt3181\_Genome\_Tile|1  
TTTTTCAGAATACAGAGGACATATGGCAAAAAGTTAAAGGACATGTGGACTATGAGGGTGC  
>HPV107\_Beta\_126131393\_nt3201\_Genome\_Tile|1  
TATGGCAAAAAGTTAAAGGACATGTGGACTATGAGGGTGCCTTTTACATGGAAGGCACAC  
>HPV107\_Beta\_126131393\_nt3221\_Genome\_Tile|1  
CATGTGGACTATGAGGGTGCCTTTTACATGGAAGGCACACACAAACATTATTATATAAAG  
>HPV107\_Beta\_126131393\_nt3241\_Genome\_Tile|1  
CTTTTACATGGAAGGCACACACAAACATTATTATATAAAGTTTGAAAATGATGCTAACAG  
>HPV107\_Beta\_126131393\_nt3921\_Genome\_Tile|1  
TTTTGTAAAGAGGGGAAGCAAACAGCTTAAATGCTATCGCTTTAGAGCACGCAAAAAGC  
>HPV107\_Beta\_126131393\_nt3961\_Genome\_Tile|1  
CTTTAGAGCACGCAAAAAGCACAAAGGAACTATAAGTATTTTAGTAGTACCTGGTCCTG  
>HPV107\_Beta\_126131393\_nt3981\_Genome\_Tile|1  
ACAAAGGAACTATAAGTATTTTAGTAGTACCTGGTCCTGGATAGGGGAACATAGTAATG  
>HPV107\_Beta\_126131393\_nt4041\_Genome\_Tile|1  
ATAGAATAGGTAGAGCCGAATGTTAGTTAGTTTACATCCACACACCAACGTGAAATGT  
>HPV107\_Beta\_126131393\_nt4061\_Genome\_Tile|1  
ATGTTAGTTAGTTTACATCCACACACCAACGTGAAATGTTTTTAGATACTATGAAATTA  
>HPV107\_Beta\_126131393\_nt4101\_Genome\_Tile|1  
TTTTTAGATACTATGAAATTACCACAAGGTGTAGACTGGTCATATGGGAATTTTGACAGCT  
>HPV107\_Beta\_126131393\_nt4121\_Genome\_Tile|1  
CCACAAGGTGTAGACTGGTCATATGGGAATTTTGACAGCTTATAATACTAACCTTTTTTGC  
>HPV107\_Beta\_126131393\_nt4141\_Genome\_Tile|1  
ATATGGGAATTTTGACAGCTTATAATACTAACCTTTTTTGCTATTTTAACTGCTGCCTAG  
>HPV107\_Beta\_126131393\_nt4161\_Genome\_Tile|1  
TATAATACTAACCTTTTTGCTATTTTAACTGCTGCCTAGCTACTAACATACTAACATGG  
>HPV107\_Beta\_126131393\_nt4181\_Genome\_Tile|1  
TATTTTAACTGCTGCCTAGCTACTAACATACTAACATGGCGCGTGCAGAACTAAA  
>HPV107\_Beta\_126131393\_nt4621\_Genome\_Tile|1  
TATTGCAGAAAGTGCATCCTGTTCTGTGCCAGATACAGAAATAGACACACCTGTTGTAAC  
>HPV107\_Beta\_126131393\_nt4681\_Genome\_Tile|1  
AGGCGGTCGAGGTTCTCTGCTGTCTAGAGGTGGCAGACCCAGCCCCCAATACGCAC  
>HPV107\_Beta\_126131393\_nt4701\_Genome\_Tile|1  
CTGTCCTAGAGGTGGCAGACCCAGCCCCCAATACGCACACGTGTGTCACGTACCCAGT



>HPV107\_Beta\_126131393\_nt4741\_Genome\_Tile|1  
ACGTGTGTCACGTACCCAGTATCACAATCCATCCTTTCAGATAATATCCGAATCTACACC  
>HPV107\_Beta\_126131393\_nt4781\_Genome\_Tile|1  
ATAATATCCGAATCTACACCTATTGCTGGTGAGGCATCCCTGTCAGACCAAGTGTTAGTG  
>HPV107\_Beta\_126131393\_nt4821\_Genome\_Tile|1  
TGTCAGACCAAGTGTTAGTGTTTGAAAATACTGGAGGACAAACAATCGGTGGGATTCGGG  
>HPV107\_Beta\_126131393\_nt4861\_Genome\_Tile|1  
AACAAATCGGTGGGATTCGGGAAGAAATTGAATTGCAACCCTTACCTTCTAGGTATAGTTT  
>HPV107\_Beta\_126131393\_nt4961\_Genome\_Tile|1  
CCTATTGAAAGAGGTAGGCAAGCGCTTTCCTCCATTTCGAAGAGCCCTGTATAATAGGCGC  
>HPV107\_Beta\_126131393\_nt5161\_Genome\_Tile|1  
TCCTGACAGGCAATTTTTGGATGTTGCCAAGTTAGGTAGGCCTCTATATTCCGAAACCCC  
>HPV107\_Beta\_126131393\_nt5181\_Genome\_Tile|1  
ATGTTGCCAAGTTAGGTAGGCCTCTATATTCCGAAACCCACAAAGGCTATATACGGGTCA  
>HPV107\_Beta\_126131393\_nt5201\_Genome\_Tile|1  
CCTCTATATTCCGAAACCCACAAAGGCTATATACGGGTCAGTAGATTAGGCAACAGAGCC  
>HPV107\_Beta\_126131393\_nt5221\_Genome\_Tile|1  
ACAAGGCTATATACGGGTCAGTAGATTAGGCAACAGAGCCTCTTTACGAACCAGAAGCGG  
>HPV107\_Beta\_126131393\_nt5261\_Genome\_Tile|1  
TCTTTACGAACCAGAAGCGGTGCACAAGTAGGGGCACAAGTACACTTTTATAAAGATGTT  
>HPV107\_Beta\_126131393\_nt5341\_Genome\_Tile|1  
TCCTATTGAACTACAATTACTGGGGGAACATTTCAGGAGACACCAGTATTATCCAAGGGCC  
>HPV107\_Beta\_126131393\_nt5381\_Genome\_Tile|1  
ACCAGTATTATCCAAGGGCCTGTTGAAAAGTACACTGGTGGATATTAATGTAAGGGATACT  
>HPV107\_Beta\_126131393\_nt5401\_Genome\_Tile|1  
TGTTGAAAGTACACTGGTGGATATTAATGTAAGGGATACTCCAGAATTGCTTGAAAGTTC  
>HPV107\_Beta\_126131393\_nt5421\_Genome\_Tile|1  
ATATTAATGTAAGGGATACTCCAGAATTGCTTGAAAGTTCTGAATTTAACTCTCAGGATC  
>HPV107\_Beta\_126131393\_nt5441\_Genome\_Tile|1  
CCAGAATTGCTTGAAAGTTCTGAATTTAACTCTCAGGATCTACTTATTGATGATGCTATA  
>HPV107\_Beta\_126131393\_nt5501\_Genome\_Tile|1  
GAGGATTTTAGTGGGTCACAGCTAGTGTTTGCAACCCTAGACGGTCTACCACTTCTGTGTC  
>HPV107\_Beta\_126131393\_nt5521\_Genome\_Tile|1  
GCTAGTGTTTGCAACCCTAGACGGTCTACCACTTCTGTCACTGTACCCAGATTTAGTTC  
>HPV107\_Beta\_126131393\_nt5541\_Genome\_Tile|1  
GACGGTCTACCACTTCTGTCACTGTACCCAGATTTAGTTCTCCAAGGGAACTACTTTAT  
>HPV107\_Beta\_126131393\_nt5681\_Genome\_Tile|1  
ATTCCTGCAGTTGTTATCCATTTTGGGGAATCAGGTGCTGATTACTATTTACATCCCCAT  
>HPV107\_Beta\_126131393\_nt5701\_Genome\_Tile|1  
TTTTGGGGAATCAGGTGCTGATTACTATTTACATCCCCATTTACAGCGACGCAAGCGCAA  
>HPV107\_Beta\_126131393\_nt5861\_Genome\_Tile|1  
CCGATGAGTACGTGGAGCGGACCAATATATTTATCACGCCACTAGTGACAGATTATTAA  
>HPV107\_Beta\_126131393\_nt6161\_Genome\_Tile|1  
ATAAGGTAAAGGACACTGAAAATACAAATAGCTATCAAAACAGTTCAACAGATGATAGAC  
>HPV107\_Beta\_126131393\_nt6301\_Genome\_Tile|1  
GCACTGCCATGCGATGATGCTGGTGACCAACAAGGTAAATGTCCGCCCATTTGAATTAAAA  
>HPV107\_Beta\_126131393\_nt6321\_Genome\_Tile|1  
TGGTGACCAACAAGGTAAATGTCCGCCCATTTGAATTAAAAAATTCTTTTATAGAAGATGG  
>HPV107\_Beta\_126131393\_nt6361\_Genome\_Tile|1  
AATTCTTTTATAGAAGATGGGGATATGATAGATATTGGGTTTGCGCAATATAAATAACAAG  
>HPV107\_Beta\_126131393\_nt6381\_Genome\_Tile|1  
GGATATGATAGATATTGGGTTTGCGCAATATAAATAACAAGACATTATCAGTAAACAAATC  
>HPV107\_Beta\_126131393\_nt6401\_Genome\_Tile|1  
TTGGCAATATAAATAACAAGACATTATCAGTAAACAAATCAGATGTTAGTTTAGATTTAG  
>HPV107\_Beta\_126131393\_nt6561\_Genome\_Tile|1

ACATTATTTCACTAGAGGAGGAGCTGTGGGTGATGCTATACCTGATACAACAACCTAATCA  
>HPV107\_Beta\_126131393\_nt6581\_Genome\_Tile|1  
GAGCTGTGGGTGATGCTATACCTGATACAACAACCTAATCAAGATCACAAATACTATATAG  
>HPV107\_Beta\_126131393\_nt6601\_Genome\_Tile|1  
CCTGATACAACAACCTAATCAAGATCACAAATACTATATAGCACCTAAGAGTGGACAATCC  
>HPV107\_Beta\_126131393\_nt6621\_Genome\_Tile|1  
AGATCACAAATACTATATAGCACCTAAGAGTGGACAATCCCAAAGTCCTTTGGGTAATTC  
>HPV107\_Beta\_126131393\_nt6661\_Genome\_Tile|1  
CAAAGTCCTTTGGGTAATTCTATTTACTATCCCACCGTTAGTGGCTCCTTAGTTTCTTCT  
>HPV107\_Beta\_126131393\_nt6701\_Genome\_Tile|1  
GTGGCTCCTTAGTTTCTTCTGATGCACAGCTCTTTAACAGACCCTTCTGGTTGAAACGTG  
>HPV107\_Beta\_126131393\_nt6841\_Genome\_Tile|1  
ACTATAAGTGTGCCTAGTCAAAATGGACCCCTTACAGAATATGATGCCAATAATATCAGG  
>HPV107\_Beta\_126131393\_nt6881\_Genome\_Tile|1  
ATGATGCCAATAATATCAGGGAATTTTAAAGGCATGTTGAGGAATATCAAATATCTGTAA  
>HPV107\_Beta\_126131393\_nt6941\_Genome\_Tile|1  
TACTGCAACTTTGTAAAGTGTCTTTACAACCAGATGTGTTAGCCCCAAATTAATGCTATGA  
>HPV107\_Beta\_126131393\_nt7181\_Genome\_Tile|1  
TATCTTTGGATTTAGATCAGTATCCTTTAGGACGTAAATTCTTATCCAAACAACACTAC  
>HPV107\_Beta\_126131393\_nt7301\_Genome\_Tile|1  
AACGTACTTGACCGAAATCGGTCCCTCTCAATAAACAAGTATTCTAACTAAAGTGGTATG  
>HPV60\_Gamma\_9628566\_nt0001\_Genome\_Tile|1  
TATAGGATATACACTGATTGTTGGCAACTATCATTAATCATAAAAAAATATGACCAGA  
>HPV60\_Gamma\_9628566\_nt0021\_Genome\_Tile|1  
TTGGCAACTATCATTAATCATAAAAAAATATGACCAGAAGAGGTATATATAAATAGCT  
>HPV60\_Gamma\_9628566\_nt0041\_Genome\_Tile|1  
ATAAAAAAATATGACCAGAAGAGGTATATATAAATAGCTGAGACGTTTCGTAAACTTTAG  
>HPV60\_Gamma\_9628566\_nt0061\_Genome\_Tile|1  
AGAGGTATATATAAATAGCTGAGACGTTTCGTAAACTTTAGGATGCAGATGGAAGAAGACA  
>HPV60\_Gamma\_9628566\_nt0081\_Genome\_Tile|1  
GAGACGTTTCGTAAACTTTAGGATGCAGATGGAAGAAGACAGGTTTCCAACAACAGTGGCT  
>HPV60\_Gamma\_9628566\_nt0101\_Genome\_Tile|1  
GATGCAGATGGAAGAAGACAGGTTTCCAACAACAGTGGCTGATTATTGCTCTGAATTTGA  
>HPV60\_Gamma\_9628566\_nt0121\_Genome\_Tile|1  
GGTTTCCAACAACAGTGGCTGATTATTGCTCTGAATTTGATATTCTTTAAAAGATCTTA  
>HPV60\_Gamma\_9628566\_nt0181\_Genome\_Tile|1  
AGTTAAAATGTGTATTTTGTAGATTTTACTTAACTGAACAGCAGTTGGCTGCATTTTATA  
>HPV60\_Gamma\_9628566\_nt0261\_Genome\_Tile|1  
TGGA AAAACCGTTATTGCTTTGCTTGTGTACTCCGTGTCTTAGACTTACTGCTAAATTT  
>HPV60\_Gamma\_9628566\_nt0281\_Genome\_Tile|1  
TGCTTGTTGTA TCTCCGTGTCTTAGACTTACTGCTAAATTTGAAGCTGAAAACCTATTTTCA  
>HPV60\_Gamma\_9628566\_nt0301\_Genome\_Tile|1  
TTAGACTTACTGCTAAATTTGAAGCTGAAAACCTATTTTCAGTGTATGTGTAAAGGAGAAG  
>HPV60\_Gamma\_9628566\_nt0321\_Genome\_Tile|1  
GAAGCTGAAAACCTATTTTCAGTGTATGTGTAAAGGAGAAGTATTAGAAGTTCTAACTCGT  
>HPV60\_Gamma\_9628566\_nt0341\_Genome\_Tile|1  
GTGTATGTGTAAAGGAGAAGTATTAGAAGTTCTAACTCGTATTCTTTGAGTTCTCTTTC  
>HPV60\_Gamma\_9628566\_nt0361\_Genome\_Tile|1  
TATTAGAAGTTCTAACTCGTATTCTTTGAGTTCTCTTTCTGTACGCTGTTTTGATTGCC  
>HPV60\_Gamma\_9628566\_nt0381\_Genome\_Tile|1  
ATTCTTTGAGTTCTCTTTCTGTACGCTGTTTTGATTGCCTTACATTGTTATCTTTTGCA  
>HPV60\_Gamma\_9628566\_nt0401\_Genome\_Tile|1  
TGTACGCTGTTTTGATTGCCTTACATTGTTATCTTTTGACAGAAAAAATAGATTGTATAAT  
>HPV60\_Gamma\_9628566\_nt0421\_Genome\_Tile|1  
TTACATTGTTATCTTTTGACAGAAAAAATAGATTGTATAATTAGTGGTCAAAACCTTTTATC

>HPV60\_Gamma\_9628566\_nt0481\_Genome\_Tile|1  
TTGTAAGGGGTCGCTGGAGATCATATTGTAGAAATTGCATTGAGAAATGATTGGTAATCA  
>HPV60\_Gamma\_9628566\_nt0501\_Genome\_Tile|1  
TCATATTGTAGAAATTGCATTGAGAAATGATTGGTAATCAGCCTAATGTTAATAACCTTG  
>HPV60\_Gamma\_9628566\_nt0521\_Genome\_Tile|1  
TGAGAAATGATTGGTAATCAGCCTAATGTTAATAACCTTGATGTAAATTTGGAGGAGTTG  
>HPV60\_Gamma\_9628566\_nt0541\_Genome\_Tile|1  
GCCTAATGTTAATAACCTTGATGTAAATTTGGAGGAGTTGGTTTTACCTGTCAGTCTTTT  
>HPV60\_Gamma\_9628566\_nt0561\_Genome\_Tile|1  
ATGTAAATTTGGAGGAGTTGGTTTTACCTGTCAGTCTTTTAGCTGATGAGGAGTTGTCAC  
>HPV60\_Gamma\_9628566\_nt0581\_Genome\_Tile|1  
GTTTTACCTGTCAGTCTTTTAGCTGATGAGGAGTTGTCACCCGATGGTGATCCTGAGGAG  
>HPV60\_Gamma\_9628566\_nt0661\_Genome\_Tile|1  
AATAGACACCTGTTGCAAACCTTGTGGAGCAGGTGTTAGATTTACTATTATTGCTACTCC  
>HPV60\_Gamma\_9628566\_nt0681\_Genome\_Tile|1  
CTTGTGGAGCAGGTGTTAGATTTACTATTATTGCTACTCCTTCTGCTGTAATAACTCTTC  
>HPV60\_Gamma\_9628566\_nt0701\_Genome\_Tile|1  
TTTACTATTATTGCTACTCCTTCTGCTGTAATAACTCTTCGTCAACTATTGCTTCAAGAA  
>HPV60\_Gamma\_9628566\_nt0741\_Genome\_Tile|1  
GTCAACTATTGCTTCAAGAAGTGTTCTGACCTGTTTGAGGTGCTCCAGATCCCTTTTTTC  
>HPV60\_Gamma\_9628566\_nt0801\_Genome\_Tile|1  
GACATGGCAGATCCTAATAAAGGTATTAATTCCTTGAATTAAATGAGGGGCATAGCGAA  
>HPV60\_Gamma\_9628566\_nt0821\_Genome\_Tile|1  
AGGTATTAATTCCTTGAATTAAATGAGGGGCATAGCGAATGGTATGTTGTGACAGAAGC  
>HPV60\_Gamma\_9628566\_nt0841\_Genome\_Tile|1  
TAAATGAGGGGCATAGCGAATGGTATGTTGTGACAGAAGCTGAGTGTATTAATAGTTTGG  
>HPV60\_Gamma\_9628566\_nt0861\_Genome\_Tile|1  
TGGTATGTTGTGACAGAAGCTGAGTGTATTAATAGTTTGGATACAATGGAAGAGCTATTT  
>HPV60\_Gamma\_9628566\_nt0961\_Genome\_Tile|1  
ACGATTCCGAGGAAGCTGGAGGAGGGAAATTCCTGGCACTCTACAATGAACAGTTAACAG  
>HPV60\_Gamma\_9628566\_nt1021\_Genome\_Tile|1  
AGGATTGCAATAGAGCTATTTTAGCGCTAAAACGAAAGTTAACTAAAACACCTTTGAAAA  
>HPV60\_Gamma\_9628566\_nt1041\_Genome\_Tile|1  
TTAGCGCTAAAACGAAAGTTAACTAAAACACCTTTGAAAAGCCAGGACAGAACGGTTGCT  
>HPV60\_Gamma\_9628566\_nt1081\_Genome\_Tile|1  
GCCAGGACAGAACGGTTGCTGACCTAAGTCCAAGGTTGGAAGCTGTCACAATTTACCTC  
>HPV60\_Gamma\_9628566\_nt1101\_Genome\_Tile|1  
GACCTAAGTCCAAGGTTGGAAGCTGTCACAATTTACCTCAGAGACAAAAGCAAAGGAGA  
>HPV60\_Gamma\_9628566\_nt1181\_Genome\_Tile|1  
AGGAGAAGATGAAGCTACAAATTCATTGAAAAAAGGTAGTTTCGAACTCTTTAGAGAG  
>HPV60\_Gamma\_9628566\_nt1201\_Genome\_Tile|1  
ATTCTATTGAAAAAAGGTAGTTTCGAACTCTTTAGAGAGTAATGAAAGTGGGACCTTGG  
>HPV60\_Gamma\_9628566\_nt1241\_Genome\_Tile|1  
TAATGAAAGTGGGACCTTGGTTGTGGAAACGGACAGTATATTTTCGAGTACTAATAGAAA  
>HPV60\_Gamma\_9628566\_nt1281\_Genome\_Tile|1  
TTTCGCAGTACTAATAGAAAAGCCACTTTATTGGCTAAATTTAAAGAATACTTTGGTGTA  
>HPV60\_Gamma\_9628566\_nt1301\_Genome\_Tile|1  
AGCCACTTTATTGGCTAAATTTAAAGAATACTTTGGTGTAGCATATGGAGATTTAACGCG  
>HPV60\_Gamma\_9628566\_nt1321\_Genome\_Tile|1  
TTAAAGAATACTTTGGTGTAGCATATGGAGATTTAACGCGACCGTTTAAAGTGATAGAT  
>HPV60\_Gamma\_9628566\_nt1381\_Genome\_Tile|1  
CATGTTGTGAAAAGTGGGTTATAAGTGTGTGTGCCGCTGCAGAAGAAGTAATAGAAGCTT  
>HPV60\_Gamma\_9628566\_nt1421\_Genome\_Tile|1  
AGAAGAAGTAATAGAAGCTTCAAAAACAGTTATGCAGCAACATTGTGATTTTTTACAGGT  
>HPV60\_Gamma\_9628566\_nt1441\_Genome\_Tile|1

CAAAAACAGTTATGCAGCAACATTGTGATTTTTTACAGGTTATTTTCATATGGGTTTTATG  
>HPV60\_Gamma\_9628566\_nt1461\_Genome\_Tile|1  
CATTGTGATTTTTTACAGGTTATTTTCATATGGGTTTTATGCTTTATATTTGGTAAAATTT  
>HPV60\_Gamma\_9628566\_nt1481\_Genome\_Tile|1  
TATTTTCATATGGGTTTTATGCTTTATATTTGGTAAAATTTAAAACAGCAAAAAGTAGAGA  
>HPV60\_Gamma\_9628566\_nt1501\_Genome\_Tile|1  
CTTTATATTTGGTAAAATTTAAAACAGCAAAAAGTAGAGATACTATAATGAAATTATTTT  
>HPV60\_Gamma\_9628566\_nt1541\_Genome\_Tile|1  
TACTATAATGAAATTATTTTCTTTAACATTGAATGTACAAGAACAACAATTAATGTGTGA  
>HPV60\_Gamma\_9628566\_nt1601\_Genome\_Tile|1  
TCCACCAAAATCTAGAAGTACCCCAACAGCTCTTTATTTTTTATAGAAGGTCATTTGGAAA  
>HPV60\_Gamma\_9628566\_nt1661\_Genome\_Tile|1  
TGCATCGTTTATTTATGGACCGTTTCCAGATTGGTTAGCAAAATTAACATATGTTAGACCA  
>HPV60\_Gamma\_9628566\_nt1681\_Genome\_Tile|1  
CGTTTCCAGATTGGTTAGCAAAATTAACATATGTTAGACCATGAATCCGCCGCGAGCTCAG  
>HPV60\_Gamma\_9628566\_nt1701\_Genome\_Tile|1  
AAATTAACATATGTTAGACCATGAATCCGCCGCGAGCTCAGAACAGTTTGAACCTTGCTCAA  
>HPV60\_Gamma\_9628566\_nt1721\_Genome\_Tile|1  
TGAATCCGCCGCGAGCTCAGAACAGTTTGAACCTTGCTCAAATGATTCAATTTGCTTATGA  
>HPV60\_Gamma\_9628566\_nt1741\_Genome\_Tile|1  
AACAGTTTGAACCTTGCTCAAATGATTCAATTTGCTTATGACAATAACTTGACAACCTGAAT  
>HPV60\_Gamma\_9628566\_nt1761\_Genome\_Tile|1  
ATGATTCAATTTGCTTATGACAATAACTTGACAACCTGAATCTGAAATAGCTTATAAATAT  
>HPV60\_Gamma\_9628566\_nt1781\_Genome\_Tile|1  
CAATAACTTGACAACCTGAATCTGAAATAGCTTATAAATATGCATTGTTAGCTGATTCTGA  
>HPV60\_Gamma\_9628566\_nt1881\_Genome\_Tile|1  
AAATATGTACGAGACTGCTATGCAATGTTAAGATATTATAAAAGACAAGAAATGAAAGAT  
>HPV60\_Gamma\_9628566\_nt1921\_Genome\_Tile|1  
AAAGACAAGAAATGAAAGATATGTCAATTTCTGAGTGGATATGGAAATGTTGCGATGATT  
>HPV60\_Gamma\_9628566\_nt2001\_Genome\_Tile|1  
AAATTAATAGCACAAATTTTTACGTTATCAAGAAGTTAATTTTCATTTTATTTTATGTGCA  
>HPV60\_Gamma\_9628566\_nt2021\_Genome\_Tile|1  
ACGTTATCAAGAAGTTAATTTTCATTTTCATTTTATGTGCATTAAAGACATTGTTTAAAGG  
>HPV60\_Gamma\_9628566\_nt2061\_Genome\_Tile|1  
TTAAAGACATTGTTTAAAGGTATTCCAAAAAGAAATTGTTTAGTGTTTTGGGGACCTCCA  
>HPV60\_Gamma\_9628566\_nt2121\_Genome\_Tile|1  
GATACAGGAAAAGTCTTATATTTGTTCTTCACTTACACGGTTTATGCAGGGAAAAGTGGTA  
>HPV60\_Gamma\_9628566\_nt2141\_Genome\_Tile|1  
TTGTTCTTCACTTACACGGTTTATGCAGGGAAAAGTGGTATCTTTTCATGAATAGACACAG  
>HPV60\_Gamma\_9628566\_nt2161\_Genome\_Tile|1  
TTATGCAGGGAAAAGTGGTATCTTTTCATGAATAGACACAGTCAATTTTGGCTACAACCTT  
>HPV60\_Gamma\_9628566\_nt2181\_Genome\_Tile|1  
TCTTTTCATGAATAGACACAGTCAATTTTGGCTACAACCTTTACAAGATTGTAAGCTTGGA  
>HPV60\_Gamma\_9628566\_nt2221\_Genome\_Tile|1  
TACAAGATTGTAAGCTTGGATTCTTAGATGATGCTACATTTCAATGTTGGCAATACATGG  
>HPV60\_Gamma\_9628566\_nt2341\_Genome\_Tile|1  
CTCCTTTACAAATAAAATTACCTCCTTTATTAATAACTACCAATGTTGATGTTGAAAATG  
>HPV60\_Gamma\_9628566\_nt2361\_Genome\_Tile|1  
CCTCCTTTATTAATAACTACCAATGTTGATGTTGAAAATGAAGCTAGCTTAATGTATTTA  
>HPV60\_Gamma\_9628566\_nt2381\_Genome\_Tile|1  
CAATGTTGATGTTGAAAATGAAGCTAGCTTAATGTATTTAAAGAGTAGACTAGTATTTTT  
>HPV60\_Gamma\_9628566\_nt2421\_Genome\_Tile|1  
AAGAGTAGACTAGTATTTTTTAAAGTTTCTTAACAAATTACCTTTAAAAAGAAAATGATGAA  
>HPV60\_Gamma\_9628566\_nt2441\_Genome\_Tile|1  
TAAGTTTCTTAACAAATTACCTTTAAAAAGAAAATGATGAAGTACTTTATGAAATTACTGA

>HPV60\_Gamma\_9628566\_nt2461\_Genome\_Tile|1  
CTTTAAAAGAAAATGATGAAGTACTTTATGAAATTACTGATGCATCATGGAAATGTTTTT  
>HPV60\_Gamma\_9628566\_nt2481\_Genome\_Tile|1  
GTACTTTATGAAATTACTGATGCATCATGGAAATGTTTTTTTATCAAATTTGCAAGCCAT  
>HPV60\_Gamma\_9628566\_nt2521\_Genome\_Tile|1  
TTATCAAATTTGCAAGCCATTTAGAGCTGACAGCCAGAGGAGACGAGCAGCATGAATCAG  
>HPV60\_Gamma\_9628566\_nt2541\_Genome\_Tile|1  
TTAGAGCTGACAGCCAGAGGAGACGAGCAGCATGAATCAGGCCGATCTGACCGAGCGTTC  
>HPV60\_Gamma\_9628566\_nt2561\_Genome\_Tile|1  
AGACGAGCAGCATGAATCAGGCCGATCTGACCGAGCGTTCGATGCACTGCAGGAACAAA  
>HPV60\_Gamma\_9628566\_nt2581\_Genome\_Tile|1  
GCCGATCTGACCGAGCGTTCGATGCACTGCAGGAACAAATACTGAATCTATATGAGCAA  
>HPV60\_Gamma\_9628566\_nt2621\_Genome\_Tile|1  
TACTGAATCTATATGAGCAAGATTCAAAGGACATTCAGGCCCAAATACAATATTGGGATT  
>HPV60\_Gamma\_9628566\_nt2641\_Genome\_Tile|1  
GATTCAAAGGACATTCAGGCCCAAATACAATATTGGGATTAAATAGAAAACCTATATGTC  
>HPV60\_Gamma\_9628566\_nt2681\_Genome\_Tile|1  
TAAATAGAAAACCTATATGTCACATACTATTATGCAAGAAAAGAGGCTATTCGCATTTGG  
>HPV60\_Gamma\_9628566\_nt2721\_Genome\_Tile|1  
AGAAGGCTATTCGCATTTGGGTCTTCAACCCCTTACCAGCTTTGCAAGTATCAGAGTACAA  
>HPV60\_Gamma\_9628566\_nt2741\_Genome\_Tile|1  
GTCTTCAACCCCTTACCAGCTTTGCAAGTATCAGAGTACAAAGCCAAGCAGGCAATCGAAA  
>HPV60\_Gamma\_9628566\_nt2761\_Genome\_Tile|1  
TTGCAAGTATCAGAGTACAAAGCCAAGCAGGCAATCGAAATGGGATTGTTATTAACCAGT  
>HPV60\_Gamma\_9628566\_nt2781\_Genome\_Tile|1  
AGCCAAGCAGGCAATCGAAATGGGATTGTTATTAACCAGTTTAAGCAAATCCCAATATGC  
>HPV60\_Gamma\_9628566\_nt2801\_Genome\_Tile|1  
TGGGATTGTTATTAACCAGTTTAAGCAAATCCCAATATGCTTCAGAACTATGGGGTTTAA  
>HPV60\_Gamma\_9628566\_nt2841\_Genome\_Tile|1  
TTCAGAACTATGGGGTTTAAACAGATACAAGTGCAGAATTGTTATTAACCCCTCCAAGAAA  
>HPV60\_Gamma\_9628566\_nt2861\_Genome\_Tile|1  
CAGATACAAGTGCAGAATTGTTATTAACCCCTCCAAGAAATACATTTAAAAAGAAGGGAT  
>HPV60\_Gamma\_9628566\_nt2881\_Genome\_Tile|1  
TTATTAACCCCTCCAAGAAATACATTTAAAAAGAAGGGATATACTGTAAATGTGTGGTTT  
>HPV60\_Gamma\_9628566\_nt2901\_Genome\_Tile|1  
TACATTTAAAAAGAAGGGATATACTGTAAATGTGTGGTTTGATAATAATGAAAATAATAC  
>HPV60\_Gamma\_9628566\_nt2981\_Genome\_Tile|1  
AATATATTTACTATCAGGATGATATTGAACAATGGCACAGGACCAGAGGAGAGGTGGACT  
>HPV60\_Gamma\_9628566\_nt3001\_Genome\_Tile|1  
GATATTGAACAATGGCACAGGACCAGAGGAGAGGTGGACTATAATGGACTTTATTTTACA  
>HPV60\_Gamma\_9628566\_nt3061\_Genome\_Tile|1  
GAAAATAATGGAAATAGAGCATATTTCTCCTATTTGATAGTGATGCACAAACATATTCA  
>HPV60\_Gamma\_9628566\_nt3101\_Genome\_Tile|1  
GTGATGCACAAACATATTCACAAACTGGGACATGGACAGTGCATTATAAAAACCAAATTA  
>HPV60\_Gamma\_9628566\_nt3181\_Genome\_Tile|1  
TCCTCAAAACAATCCTCCGACGACTACACTTCCAAAGCCGGGCAGCAACCCCACTTCTTC  
>HPV60\_Gamma\_9628566\_nt3261\_Genome\_Tile|1  
TACTACCGACGGAGGACAGACCTCACAAGAGGGAGTCTCTAGCTCTACCACGTCGCCGAG  
>HPV60\_Gamma\_9628566\_nt3321\_Genome\_Tile|1  
TGCTGTTTCGATTACGACGCCGAAGATCCAACGAGCAACAAAGAGAACTATCCTCCAGAGA  
>HPV60\_Gamma\_9628566\_nt3341\_Genome\_Tile|1  
GAAGATCCAACGAGCAACAAAGAGAACTATCCTCCAGAGAGTCGCCCCGTACCAAAGAC  
>HPV60\_Gamma\_9628566\_nt3361\_Genome\_Tile|1  
AGAGAACTATCCTCCAGAGAGTCGCCCCGTACCAAAGACGCAGAGTACCCGACGAAGTC  
>HPV60\_Gamma\_9628566\_nt3401\_Genome\_Tile|1

GCAGAGTACCCGACGAAGTCGACCGACAGAGTGCCGTGGGGTCTGCCCCAACTGCTGAAG  
>HPV60\_Gamma\_9628566\_nt3481\_Genome\_Tile|1  
TCTCTTCCTAGAAGCGGTATATCAAGACTTGCAAGACTTCAAGGAGAAGCTCGGGATCCT  
>HPV60\_Gamma\_9628566\_nt3501\_Genome\_Tile|1  
ATCAAGACTTGCAAGACTTCAAGGAGAAGCTCGGGATCCTCCAATCCTGCTAATTAAAGG  
>HPV60\_Gamma\_9628566\_nt3521\_Genome\_Tile|1  
AAGGAGAAGCTCGGGATCCTCCAATCCTGCTAATTAAAGGTCTAGCAAACCTCCCTTAAAT  
>HPV60\_Gamma\_9628566\_nt3541\_Genome\_Tile|1  
CCAATCCTGCTAATTAAAGGTCTAGCAAACCTCCCTTAAATGTTGGAGATATCGATTGAAA  
>HPV60\_Gamma\_9628566\_nt3561\_Genome\_Tile|1  
TCTAGCAAACCTCCCTTAAATGTTGGAGATATCGATTGAAAAAGTATACACGTTATTTTAA  
>HPV60\_Gamma\_9628566\_nt3581\_Genome\_Tile|1  
GTTGGAGATATCGATTGAAAAAGTATACACGTTATTTTAAATGTATGAGTACAGTATTTA  
>HPV60\_Gamma\_9628566\_nt3601\_Genome\_Tile|1  
AAGTATACACGTTATTTTAAATGTATGAGTACAGTATTTAGATGGGTAGACATAGACGTA  
>HPV60\_Gamma\_9628566\_nt3621\_Genome\_Tile|1  
ATGTATGAGTACAGTATTTAGATGGGTAGACATAGACGTACCAGAATCTTCTAGACATAA  
>HPV60\_Gamma\_9628566\_nt3641\_Genome\_Tile|1  
GATGGGTAGACATAGACGTACCAGAATCTTCTAGACATAAATTGTTAGTTGTTTTTAATG  
>HPV60\_Gamma\_9628566\_nt3661\_Genome\_Tile|1  
CCAGAATCTTCTAGACATAAATTGTTAGTTGTTTTTAATGATACCACACAACGAGATGTT  
>HPV60\_Gamma\_9628566\_nt3681\_Genome\_Tile|1  
ATTGTTAGTTGTTTTTAATGATACCACACAACGAGATGTTTTTATGAAATTAGTAACTTT  
>HPV60\_Gamma\_9628566\_nt3721\_Genome\_Tile|1  
TTTATGAAATTAGTAACTTTGCCAAGAGGTTGTACATATACATTTGGAACATTAAACTCT  
>HPV60\_Gamma\_9628566\_nt3761\_Genome\_Tile|1  
CATTTGGAACATTAAACTCTTTGTAATATTTGTAAAACAAAACAAAATGTATGCTAGAGT  
>HPV60\_Gamma\_9628566\_nt3781\_Genome\_Tile|1  
TTGTAATATTTGTAAAACAAAACAAAATGTATGCTAGAGTAAAGCGTGTTAAAAGAGACT  
>HPV60\_Gamma\_9628566\_nt3801\_Genome\_Tile|1  
AACAAAATGTATGCTAGAGTAAAGCGTGTTAAAAGAGACTCTGTTGAAAACCTTATATAAA  
>HPV60\_Gamma\_9628566\_nt3821\_Genome\_Tile|1  
AAAGCGTGTTAAAAGAGACTCTGTTGAAAACCTTATATAAACAATGTCAACTTGGTGCTGA  
>HPV60\_Gamma\_9628566\_nt3841\_Genome\_Tile|1  
CTGTTGAAAACCTTATATAAACAATGTCAACTTGGTGCTGACTGCCCTCCTGATGTACGAA  
>HPV60\_Gamma\_9628566\_nt3881\_Genome\_Tile|1  
CTGCCCTCCTGATGTACGAAATAAAGTAGAAGGAACCACACTTGCAGATCGATTATTACA  
>HPV60\_Gamma\_9628566\_nt3901\_Genome\_Tile|1  
ATAAAGTAGAAGGAACCACACTTGCAGATCGATTATTACAAATATTTGGAAGTATCTTAT  
>HPV60\_Gamma\_9628566\_nt3941\_Genome\_Tile|1  
AATATTTGGAAGTATCTTATACCTGGGGAATTTGGGTATAGGGACAGGTAAAGGATCGGG  
>HPV60\_Gamma\_9628566\_nt3961\_Genome\_Tile|1  
ACCTGGGGAATTTGGGTATAGGGACAGGTAAAGGATCGGGGGGTGCTACAGGCTATACAC  
>HPV60\_Gamma\_9628566\_nt3981\_Genome\_Tile|1  
GGGACAGGTAAAGGATCGGGGGGTGCTACAGGCTATACACCTCTTGGTACTGCAAGAGTG  
>HPV60\_Gamma\_9628566\_nt4021\_Genome\_Tile|1  
CTCTTGGTACTGCAAGAGTGCCAGCGTCTACACCTGGAACAGTTATAAAACCCACACGAC  
>HPV60\_Gamma\_9628566\_nt4061\_Genome\_Tile|1  
AGTTATAAAACCCACACGACCGTTTTTCGGTTCCTTTAGATCCAATAGGTTCTGGAATTCC  
>HPV60\_Gamma\_9628566\_nt4101\_Genome\_Tile|1  
CCAATAGGTTCTGGAATTCATCGCAACCTGTAGGAGGTCGGTTACCTGTGGACATTATA  
>HPV60\_Gamma\_9628566\_nt4121\_Genome\_Tile|1  
ATCGCAACCTGTAGGAGGTGCGTTACCTGTGGACATTATAGATGCCAGTGCTTCCTCTAT  
>HPV60\_Gamma\_9628566\_nt4141\_Genome\_Tile|1  
GGTTACCTGTGGACATTATAGATGCCAGTGCTTCCTCTATTATACCCCTGCAGGAGGTCC

>HPV60\_Gamma\_9628566\_nt4161\_Genome\_Tile|1  
GATGCCAGTGCTTCCTCTATTATACCTTGCAGGAGGTCCTGCCAGAGACCACCATTATA  
>HPV60\_Gamma\_9628566\_nt4201\_Genome\_Tile|1  
TGCCAGAGACCACCATTATAGTAGGCGGTGACAGCGGTCCTGGATTGGGTGCAAGTGAAA  
>HPV60\_Gamma\_9628566\_nt4221\_Genome\_Tile|1  
GTAGGCGGTGACAGCGGTCCTGGATTGGGTGCAAGTGAAATTGATATAGTTTCAGAACCA  
>HPV60\_Gamma\_9628566\_nt4241\_Genome\_Tile|1  
TGGATTGGGTGCAAGTGAAATTGATATAGTTTCAGAACCAAGACCAGATGTGGTCGGTGT  
>HPV60\_Gamma\_9628566\_nt4261\_Genome\_Tile|1  
TTGATATAGTTTCAGAACCAAGACCAGATGTGGTCGGTGTGATACTCAACCAACAGTAT  
>HPV60\_Gamma\_9628566\_nt4281\_Genome\_Tile|1  
AGACCAGATGTGGTCGGTGTGATACTCAACCAACAGTATATACCTCCATTGATAATACA  
>HPV60\_Gamma\_9628566\_nt4301\_Genome\_Tile|1  
TGATACTCAACCAACAGTATATACCTCCATTGATAATACAGTTGCTACATTAGACATTAC  
>HPV60\_Gamma\_9628566\_nt4341\_Genome\_Tile|1  
GTTGCTACATTAGACATTACACCAGCTACACCACCAGTGAAGAAAATAATATTAGACCCT  
>HPV60\_Gamma\_9628566\_nt4361\_Genome\_Tile|1  
ACCAGCTACACCACCAGTGAAGAAAATAATATTAGACCCTATAAGTTCAGGTTCTGAAGG  
>HPV60\_Gamma\_9628566\_nt4381\_Genome\_Tile|1  
AGAAAATAATATTAGACCCTATAAGTTCAGGTTCTGAAGGTGCTGCAGCAATAACATTTT  
>HPV60\_Gamma\_9628566\_nt4401\_Genome\_Tile|1  
ATAAGTTCAGGTTCTGAAGGTGCTGCAGCAATAACATTTTCAGATATAAGTGCTGCAGAT  
>HPV60\_Gamma\_9628566\_nt4421\_Genome\_Tile|1  
TGCTGCAGCAATAACATTTTCAGATATAAGTGCTGCAGATTTAAATGTATTTGTTGATCC  
>HPV60\_Gamma\_9628566\_nt4441\_Genome\_Tile|1  
CAGATATAAGTGCTGCAGATTTAAATGTATTTGTTGATCCTCAGGGAGCAGGAGATAGAA  
>HPV60\_Gamma\_9628566\_nt4461\_Genome\_Tile|1  
TTAAATGTATTTGTTGATCCTCAGGGAGCAGGAGATAGAATAAGTTTTGGAGAAGAAATA  
>HPV60\_Gamma\_9628566\_nt4621\_Genome\_Tile|1  
GGGAATTATATAATAGATTTGTGCAGCAACAGCCAACACAAAATATTGACTTCTTAGGAC  
>HPV60\_Gamma\_9628566\_nt4761\_Genome\_Tile|1  
TTGCAAGAGGTGGCTGCAGCGCCAGACCAGGATTTTGCAGATGTCAGGGAATTAGGACGA  
>HPV60\_Gamma\_9628566\_nt4781\_Genome\_Tile|1  
GCCAGACCAGGATTTTGCAGATGTCAGGGAATTAGGACGAGCTCGGTTTTTCAGAAACATC  
>HPV60\_Gamma\_9628566\_nt4801\_Genome\_Tile|1  
ATGTCAGGGAATTAGGACGAGCTCGGTTTTTCAGAAACATCTGCAGGAACAATACGAGTCA  
>HPV60\_Gamma\_9628566\_nt4861\_Genome\_Tile|1  
GCAGATTAGGAACAAAAGGAACAATGAAAACACGAAGTGGACTAACTATTGGTCAGAAAG  
>HPV60\_Gamma\_9628566\_nt4881\_Genome\_Tile|1  
ACAATGAAAACACGAAGTGGACTAACTATTGGTCAGAAAGTTCACTTTTATTTTGATATT  
>HPV60\_Gamma\_9628566\_nt4921\_Genome\_Tile|1  
TTCACCTTTTATTTTGATATTAGTGATATTCCAGCTGCAGAAACCATACAACTAAGAACAT  
>HPV60\_Gamma\_9628566\_nt4941\_Genome\_Tile|1  
AGTGATATTCCAGCTGCAGAAACCATACAACTAAGAACATTAGGCGAGTCTTCCCACGAT  
>HPV60\_Gamma\_9628566\_nt4961\_Genome\_Tile|1  
AACCATACAACTAAGAACATTAGGCGAGTCTTCCCACGATTTTTCTGCAGTAGATAATAT  
>HPV60\_Gamma\_9628566\_nt4981\_Genome\_Tile|1  
TAGGCGAGTCTTCCCACGATTTTTCTGCAGTAGATAATATTACTGAAAGTACATATATTA  
>HPV60\_Gamma\_9628566\_nt5041\_Genome\_Tile|1  
ATTTAACTGAAACTACAAATGAAGGCCTAATACCTGACAATATACTAGAGGATGAATTTA  
>HPV60\_Gamma\_9628566\_nt5061\_Genome\_Tile|1  
GAAGGCCTAATACCTGACAATATACTAGAGGATGAATTTACAGAAAACCTTAATAATGCA  
>HPV60\_Gamma\_9628566\_nt5081\_Genome\_Tile|1  
TATACTAGAGGATGAATTTACAGAAAACCTTAATAATGCACAGCTGATATTTGCAACAAT  
>HPV60\_Gamma\_9628566\_nt5101\_Genome\_Tile|1

CAGAAAACCTTTAATAATGCACAGCTGATATTTGCAACAATAGATGAAGGAGAATCTATGA  
>HPV60\_Gamma\_9628566\_nt5121\_Genome\_Tile|1  
CAGCTGATATTTGCAACAATAGATGAAGGAGAATCTATGATCATGCCCACAATTCCTCCA  
>HPV60\_Gamma\_9628566\_nt5141\_Genome\_Tile|1  
AGATGAAGGAGAATCTATGATCATGCCCACAATTCCTCCAGGTGTAGCTTTAAAGTTATT  
>HPV60\_Gamma\_9628566\_nt5201\_Genome\_Tile|1  
TATTCCAGAAATAGCTGCAAGCGTGTTAAATGTGGTTCATCCTTCTTCTGAGTGGACTAT  
>HPV60\_Gamma\_9628566\_nt5241\_Genome\_Tile|1  
CCTTCTTCTGAGTGGACTATTTTGATTCCTAATGTTCCAGATGAAATTATTCAGCCTGCT  
>HPV60\_Gamma\_9628566\_nt5261\_Genome\_Tile|1  
TTTGATTCCTAATGTTCCAGATGAAATTATTCAGCCTGCTATGGCAGTAGATGTTTATGA  
>HPV60\_Gamma\_9628566\_nt5281\_Genome\_Tile|1  
ATGAAATTATTCAGCCTGCTATGGCAGTAGATGTTTATGATGACTTTTATTTACATCCTC  
>HPV60\_Gamma\_9628566\_nt5301\_Genome\_Tile|1  
ATGGCAGTAGATGTTTATGATGACTTTTATTTACATCCTCATCTTCTTAGGCGACGCAAA  
>HPV60\_Gamma\_9628566\_nt5401\_Genome\_Tile|1  
CTTTGGTTGCAGACAGCTGGACAATTGTATCTTCCACCAAGCAAGCCTGTTGCTCGTGTA  
>HPV60\_Gamma\_9628566\_nt5441\_Genome\_Tile|1  
GCAAGCCTGTTGCTCGTGTACTCAGTACGGATGAATATGTACAGCCAACAAATTTAGTTT  
>HPV60\_Gamma\_9628566\_nt5501\_Genome\_Tile|1  
TTCATACAGGAACTGACAGAATGCTAATTGTAGGACACCCTTATTTTGATATTATAGACA  
>HPV60\_Gamma\_9628566\_nt5521\_Genome\_Tile|1  
ATGCTAATTGTAGGACACCCTTATTTTGATATTATAGACAGTGGTTCAAATAATATTACT  
>HPV60\_Gamma\_9628566\_nt5541\_Genome\_Tile|1  
TTATTTTGATATTATAGACAGTGGTTCAAATAATATTACTGTACCTAAATGTAGTGGAAA  
>HPV60\_Gamma\_9628566\_nt5561\_Genome\_Tile|1  
GTGGTTCAAATAATATTACTGTACCTAAATGTAGTGGAAATCAGTTTAGAGTTATGCGAC  
>HPV60\_Gamma\_9628566\_nt5601\_Genome\_Tile|1  
TCAGTTTAGAGTTATGCGACTACTATTTCCAGATCCAAACAAATTTGCAATGATAGACAG  
>HPV60\_Gamma\_9628566\_nt5661\_Genome\_Tile|1  
AGCTGTCTTTAACCCAGAAAGAGAGAGATTAGTCTGGAGATTGGAAGGCCTTGAAATTGG  
>HPV60\_Gamma\_9628566\_nt5761\_Genome\_Tile|1  
TTATTTAATAAATATGGAGATACAGAAAATCCTGCCGCATATCCTTTAAAGCAGAATAAT  
>HPV60\_Gamma\_9628566\_nt5781\_Genome\_Tile|1  
TACAGAAAATCCTGCCGCATATCCTTTAAAGCAGAATAATGGTGATGACAATAGAATGGA  
>HPV60\_Gamma\_9628566\_nt5841\_Genome\_Tile|1  
TGTTTCAATGGATCCAAAACAAATGCAATTGTTTATTGTAGGATGTAAACCAGCCACTGG  
>HPV60\_Gamma\_9628566\_nt5861\_Genome\_Tile|1  
AAATGCAATTGTTTATTGTAGGATGTAAACCAGCCACTGGTGAACACTGGGATATTGCTA  
>HPV60\_Gamma\_9628566\_nt5881\_Genome\_Tile|1  
GGATGTAAACCAGCCACTGGTGAACACTGGGATATTGCTAAACCTTGTGATCCTGCTCCA  
>HPV60\_Gamma\_9628566\_nt5921\_Genome\_Tile|1  
AACCTTGTGATCCTGCTCCAGCAAAAGGATCCTGTCCCCCAATTAAATTAACACAGTCTA  
>HPV60\_Gamma\_9628566\_nt5941\_Genome\_Tile|1  
GCAAAAGGATCCTGTCCCCCAATTAAATTAACACAGTCTATAATTCAGGACGGTGAAATG  
>HPV60\_Gamma\_9628566\_nt6021\_Genome\_Tile|1  
TGCAAATTTTATTACCTTGCAAGAAGATAAATCAGGTGTTCTCTAGATATTACCAATGA  
>HPV60\_Gamma\_9628566\_nt6061\_Genome\_Tile|1  
CCTCTAGATATTACCAATGAAATTTGTAAATATCCTGATTTACTAAAAATGACAAAAGAT  
>HPV60\_Gamma\_9628566\_nt6141\_Genome\_Tile|1  
TTTCTTTGGTAAACGTGAACAAATTTATTCCAGGCATTATTTTGTAAGAGGAGGGATAGA  
>HPV60\_Gamma\_9628566\_nt6161\_Genome\_Tile|1  
AAATTTATTCCAGGCATTATTTTGTAAGAGGAGGGATAGATGGAGATAGTTTGCCAGATT  
>HPV60\_Gamma\_9628566\_nt6181\_Genome\_Tile|1  
TTTGTAAGAGGAGGGATAGATGGAGATAGTTTGCCAGATTCTGGATATTACTTAGCACCA



>HPV60\_Gamma\_9628566\_nt6201\_Genome\_Tile|1  
TGGAGATAGTTTGCCAGATTCTGGATATTACTTAGCACCACAAACTGATAAACCTCAAAA  
>HPV60\_Gamma\_9628566\_nt6221\_Genome\_Tile|1  
CTGGATATTACTTAGCACCACAAACTGATAAACCTCAAAATAACCTTGGTGGTTATAGTT  
>HPV60\_Gamma\_9628566\_nt6241\_Genome\_Tile|1  
CAAACCTGATAAACCTCAAAATAACCTTGGTGGTTATAGTTACTTCCCTACACCAAGTGGT  
>HPV60\_Gamma\_9628566\_nt6261\_Genome\_Tile|1  
TAACCTTGGTGGTTATAGTTACTTCCCTACACCAAGTGGTCTGTAGCTTCTAGTGATAA  
>HPV60\_Gamma\_9628566\_nt6381\_Genome\_Tile|1  
TTGGGGTAACCAATTATTCATTACTATAGTAGATAATACTCGAAATACTAATTTATCTAT  
>HPV60\_Gamma\_9628566\_nt6401\_Genome\_Tile|1  
TTACTATAGTAGATAATACTCGAAATACTAATTTATCTATTTTCAGTTTACAAACAAGATG  
>HPV60\_Gamma\_9628566\_nt6421\_Genome\_Tile|1  
CGAAATACTAATTTATCTATTTTCAGTTTACAAACAAGATGCTGCTATTGATAACAGATAT  
>HPV60\_Gamma\_9628566\_nt6481\_Genome\_Tile|1  
AAATATAAACAGGAAGATTTTAGACAGTATTTACGCCATACTGAAGAATATGAAGTAGAG  
>HPV60\_Gamma\_9628566\_nt6501\_Genome\_Tile|1  
TAGACAGTATTTACGCCATACTGAAGAATATGAAGTAGAGTTAATTCTGAGACTCTGTAA  
>HPV60\_Gamma\_9628566\_nt6521\_Genome\_Tile|1  
CTGAAGAATATGAAGTAGAGTTAATTCTGAGACTCTGTAAAGTGCCTTTGAATCCAGATG  
>HPV60\_Gamma\_9628566\_nt6541\_Genome\_Tile|1  
TTAATTCTGAGACTCTGTAAAGTGCCTTTGAATCCAGATGTTCTAGCTCATTTAAATGTA  
>HPV60\_Gamma\_9628566\_nt6741\_Genome\_Tile|1  
TTATAAACAGTATACATTTTGGACAATAGATTTGCAAGAACGTTTTTCTAACGAATTATC  
>HPV60\_Gamma\_9628566\_nt6761\_Genome\_Tile|1  
GGACAATAGATTTGCAAGAACGTTTTTCTAACGAATTATCCAGTTTTTCTCTTGGA AAAA  
>HPV60\_Gamma\_9628566\_nt6821\_Genome\_Tile|1  
GATATTTATATCAGTATGGCTTACTTAACGGACGAAAACGGTCTGCTAGTAGTTTTGTAA  
>HPV60\_Gamma\_9628566\_nt6841\_Genome\_Tile|1  
TTACTTAACGGACGAAAACGGTCTGCTAGTAGTTTTGTAAACGAAGAAATCAAAAACGTG  
>HPV60\_Gamma\_9628566\_nt6861\_Genome\_Tile|1  
GTCTGCTAGTAGTTTTGTAAACGAAGAAATCAAAAACGTGAAACGTAAAAGAACTAAATA  
>HPV60\_Gamma\_9628566\_nt6881\_Genome\_Tile|1  
CGAAGAAATCAAAAACGTGAAACGTAAAAGAACTAAATAAATACATATATATATTATAT  
>HPV60\_Gamma\_9628566\_nt6901\_Genome\_Tile|1  
AAACGTAAAAGAACTAAATAAATACATATATATATTATATGATTAATGAAGGATATATTA  
>HPV60\_Gamma\_9628566\_nt6921\_Genome\_Tile|1  
AATACATATATATATTATATGATTAATGAAGGATATATTAATTAATAATGCTGCTGTTGT  
>HPV60\_Gamma\_9628566\_nt6941\_Genome\_Tile|1  
GATTAATGAAGGATATATTAATTAATAATGCTGCTGTTGTAAAATGAAGGATTAATAAAT  
>HPV60\_Gamma\_9628566\_nt6961\_Genome\_Tile|1  
ATTAATAATGCTGCTGTTGTAAAATGAAGGATTAATAAATTGCACATCAGCAAGTGTCTG  
>HPV60\_Gamma\_9628566\_nt6981\_Genome\_Tile|1  
AAAATGAAGGATTAATAAATTGCACATCAGCAAGTGTCTGACTCACGGGGTCTACATTTT  
>HPV60\_Gamma\_9628566\_nt7001\_Genome\_Tile|1  
TGCACATCAGCAAGTGTCTGACTCACGGGGTCTACATTTTGTCTACCGCGCCTTCATAA  
>HPV60\_Gamma\_9628566\_nt7021\_Genome\_Tile|1  
ACTCACGGGGTCTACATTTTGTCTACCGCGCCTTCATAATTATCTTGGCATTCATATC  
>HPV60\_Gamma\_9628566\_nt7041\_Genome\_Tile|1  
TGTCTACCGCGCCTTCATAATTATCTTGGCATTCATATCGAGACTATAAGAAACAATCA  
>HPV60\_Gamma\_9628566\_nt7061\_Genome\_Tile|1  
TTATCTTGGCATTCATATCGAGACTATAAGAAACAATCACTTGGCACACTCTCGGATTT  
>HPV60\_Gamma\_9628566\_nt7101\_Genome\_Tile|1  
CTTGGCACACTCTCGGATTTAACAAGCATTCGCTGGACACTTACCAACCGTAACTGGTTAA  
>HPV60\_Gamma\_9628566\_nt7121\_Genome\_Tile|1

AACAAGCATTGCTGGACACTTACCAACCGTAACTGGTTAAAAAAGAGCGCCAAAGGGGAA  
>HPV60\_Gamma\_9628566\_nt7201\_Genome\_Tile|1  
TCCTGAAGGAACGTTTTCCAGGTAAGTACATGTTTCATACAAAGTTTTGACTCACTCTCTT  
>HPV60\_Gamma\_9628566\_nt7221\_Genome\_Tile|1  
GGTAAGTACATGTTTCATACAAAGTTTTGACTCACTCTCTTTGTTAGAAACCATTTCCGTT  
>HPV60\_Gamma\_9628566\_nt7241\_Genome\_Tile|1  
AAGTTTTGACTCACTCTCTTTGTTAGAAACCATTTCCGTTCTGTGGATATGCGCCAGACC  
>HPV50\_Gamma\_9628550\_nt0001\_Genome\_Tile|1  
TCTATCTAATAATAGTTGCCAACAATTATTAGACATAGAGACGTGACAACCGACTACGGT  
>HPV50\_Gamma\_9628550\_nt0021\_Genome\_Tile|1  
AACAATTATTAGACATAGAGACGTGACAACCGACTACGGTGCATATAAAAGAGCTGATCA  
>HPV50\_Gamma\_9628550\_nt0041\_Genome\_Tile|1  
ACGTGACAACCGACTACGGTGCATATAAAAGAGCTGATCAGCACAGATTTGAAGGAGACT  
>HPV50\_Gamma\_9628550\_nt0061\_Genome\_Tile|1  
GCATATAAAAGAGCTGATCAGCACAGATTTGAAGGAGACTGATGGAGCCTCAGAGAGCTA  
>HPV50\_Gamma\_9628550\_nt0081\_Genome\_Tile|1  
GCACAGATTTGAAGGAGACTGATGGAGCCTCAGAGAGCTAAAAATTTGGTGGACTATTGC  
>HPV50\_Gamma\_9628550\_nt0101\_Genome\_Tile|1  
GATGGAGCCTCAGAGAGCTAAAAATTTGGTGGACTATTGCAAGCAACAACAGATTAGTTT  
>HPV50\_Gamma\_9628550\_nt0121\_Genome\_Tile|1  
AAAATTTGGTGGACTATTGCAAGCAACAACAGATTAGTTTTTTTTGAATTAGAGCTACAGT  
>HPV50\_Gamma\_9628550\_nt0141\_Genome\_Tile|1  
AAGCAACAACAGATTAGTTTTTTTTGAATTAGAGCTACAGTGCTTGTGTTTTGTAAATTTGTT  
>HPV50\_Gamma\_9628550\_nt0161\_Genome\_Tile|1  
TTTTGAATTAGAGCTACAGTGCTTGTGTTTTGTAAATTTGTTATTACTTTGCCTGACTTAGC  
>HPV50\_Gamma\_9628550\_nt0181\_Genome\_Tile|1  
GCTTGTGTTTTGTAAATTTGTTATTACTTTGCCTGACTTAGCTAGCTTTCATTGTAAAAAGT  
>HPV50\_Gamma\_9628550\_nt0201\_Genome\_Tile|1  
ATTACTTTGCCTGACTTAGCTAGCTTTCATTGTAAAAAGTTAGCTCTTGTTTATAGAGAT  
>HPV50\_Gamma\_9628550\_nt0241\_Genome\_Tile|1  
TAGCTCTTGTTTATAGAGATGGTATTGCTTTTGCTGCGTGCGCTAAATGCTTAAGATTGT  
>HPV50\_Gamma\_9628550\_nt0261\_Genome\_Tile|1  
GGTATTGCTTTTGCTGCGTGCGCTAAATGCTTAAGATTGTCTGCTATCTTTGAAAATGAG  
>HPV50\_Gamma\_9628550\_nt0281\_Genome\_Tile|1  
CGCTAAATGCTTAAGATTGTCTGCTATCTTTGAAAATGAGAGATATTATACTTGCTCTAT  
>HPV50\_Gamma\_9628550\_nt0301\_Genome\_Tile|1  
CTGCTATCTTTGAAAATGAGAGATATTATACTTGCTCTATAAAAGCTTACTTGCTATCTG  
>HPV50\_Gamma\_9628550\_nt0321\_Genome\_Tile|1  
AGATATTATACTTGCTCTATAAAAGCTTACTTGCTATCTGATTTGATTGGTAGACCTTTG  
>HPV50\_Gamma\_9628550\_nt0341\_Genome\_Tile|1  
AAAAGCTTACTTGCTATCTGATTTGATTGGTAGACCTTTGAGTGAAATCGCAATTCGCTG  
>HPV50\_Gamma\_9628550\_nt0381\_Genome\_Tile|1  
AGTGAAATCGCAATTCGCTGTGAAAATGTATGTGTTTGTGGATTATATTGAAAAGTAC  
>HPV50\_Gamma\_9628550\_nt0401\_Genome\_Tile|1  
TGAAAATGTATGTGTTTGTGGATTATATTGAAAAGTACGATTGTATTTGTCACGGTGG  
>HPV50\_Gamma\_9628550\_nt0421\_Genome\_Tile|1  
TGGATTATATTGAAAAGTACGATTGTATTTGTCACGGTGGTTATTTTCATTTAGTTAGAG  
>HPV50\_Gamma\_9628550\_nt0441\_Genome\_Tile|1  
GATTGTATTTGTCACGGTGGTTATTTTCATTTAGTTAGAGGTAATTGGAGGGGCTGTTGT  
>HPV50\_Gamma\_9628550\_nt0461\_Genome\_Tile|1  
TTATTTTCATTTAGTTAGAGGTAATTGGAGGGGCTGTTGTAGAAATTGTTACGAACATGA  
>HPV50\_Gamma\_9628550\_nt0541\_Genome\_Tile|1  
CCTGATATTGTTTTAGAAGAGCTTGTGTTTGCCTGTGAATTTGCTTAGTGACGAATCTATT  
>HPV50\_Gamma\_9628550\_nt0561\_Genome\_Tile|1  
GCTTGTGTTTGCCTGTGAATTTGCTTAGTGACGAATCTATTGAAACTGATGACATAGCAGA

>HPV50\_Gamma\_9628550\_nt0581\_Genome\_Tile|1  
TGCTTAGTGACGAATCTATTGAACTGATGACATAGCAGAATCTGAAAGGTCACCATTCA  
>HPV50\_Gamma\_9628550\_nt0601\_Genome\_Tile|1  
GAAACTGATGACATAGCAGAATCTGAAAGGTCACCATTCAAGATTGATTCTACGTGTAAG  
>HPV50\_Gamma\_9628550\_nt0621\_Genome\_Tile|1  
ATCTGAAAGGTCACCATTCAAGATTGATTCTACGTGTAAGCATTGTCATTGTCGCGTTAG  
>HPV50\_Gamma\_9628550\_nt0641\_Genome\_Tile|1  
AGATTGATTCTACGTGTAAGCATTGTCATTGTCGCGTTAGACTGTGTTGTGTCGCCACCG  
>HPV50\_Gamma\_9628550\_nt0761\_Genome\_Tile|1  
AGTGCTCCAAAAGAATTGCTACGAAATGGCAGAACTTAAAGGTACAGATAATAATTCTAAT  
>HPV50\_Gamma\_9628550\_nt0821\_Genome\_Tile|1  
GTAGAAATTATTAATGAGTTGTTTGATAATGAAGCTGTCTGTGATGATGATTCTTTTCAG  
>HPV50\_Gamma\_9628550\_nt0881\_Genome\_Tile|1  
GAATTGTTTGATGAAAGTACGGATGAATCTACTATCTCTAATTTAATAGATGACTCTGAA  
>HPV50\_Gamma\_9628550\_nt0901\_Genome\_Tile|1  
GGATGAATCTACTATCTCTAATTTAATAGATGACTCTGAAAACGTTGTGCAGGGGAATTC  
>HPV50\_Gamma\_9628550\_nt0921\_Genome\_Tile|1  
ATTTAATAGATGACTCTGAAAACGTTGTGCAGGGGAATTTCCCATGCATTACTAAATGCAC  
>HPV50\_Gamma\_9628550\_nt0961\_Genome\_Tile|1  
CCATGCATTACTAAATGCACAGCTTTCAGAGGAATATGACAAAGACCTGGTTACAGTAAA  
>HPV50\_Gamma\_9628550\_nt0981\_Genome\_Tile|1  
AGCTTTCAGAGGAATATGACAAAGACCTGGTTACAGTAAAACGAAAGTTTTATGCCACCC  
>HPV50\_Gamma\_9628550\_nt1001\_Genome\_Tile|1  
AAAGACCTGGTTACAGTAAAACGAAAGTTTTATGCCACCCCGGAAAAGCTCGCCTCTGAT  
>HPV50\_Gamma\_9628550\_nt1021\_Genome\_Tile|1  
ACGAAAGTTTTATGCCACCCCGGAAAAGCTCGCCTCTGATTTGAGTCCGAGACTTTCAGC  
>HPV50\_Gamma\_9628550\_nt1161\_Genome\_Tile|1  
TTGTTCAGGTACAGGATGATAGTTCGAATGTGGCGGGAAACAAAAATGGCGCTGATGCGG  
>HPV50\_Gamma\_9628550\_nt1181\_Genome\_Tile|1  
AGTTCGAATGTGGCGGGAAACAAAAATGGCGCTGATGCGGAGTTGTATTCGTTGCTTCAT  
>HPV50\_Gamma\_9628550\_nt1221\_Genome\_Tile|1  
AGTTGTATTCGTTGCTTCATAGCAATAATCGTAGAGCTGCTTTGCTTTGTAAGTTTAAAG  
>HPV50\_Gamma\_9628550\_nt1281\_Genome\_Tile|1  
AAAAATATGGCATTCCATTTAATGAAATTACTAGAACTTTTAAAAGTAATAAGAGTTGTA  
>HPV50\_Gamma\_9628550\_nt1301\_Genome\_Tile|1  
AATGAAATTACTAGAACTTTTAAAAGTAATAAGAGTTGTACACAAAATTGGATTATTGTA  
>HPV50\_Gamma\_9628550\_nt1321\_Genome\_Tile|1  
TAAAAGTAATAAGAGTTGTACACAAAATTGGATTATTGTAGTTTTTGCCTGTGCAGAAGA  
>HPV50\_Gamma\_9628550\_nt1341\_Genome\_Tile|1  
CACAAAATTGGATTATTGTAGTTTTTGCCTGTGCAGAAGATTTAATTGAAGCTTCTAAAA  
>HPV50\_Gamma\_9628550\_nt1361\_Genome\_Tile|1  
GTTTTTGCCTGTGCAGAAGATTTAATTGAAGCTTCTAAAACCACGATGCAAAATCATGTT  
>HPV50\_Gamma\_9628550\_nt1381\_Genome\_Tile|1  
TTTAATTGAAGCTTCTAAAACCACGATGCAAAATCATGTTTCTTATTTACAAATGATTAC  
>HPV50\_Gamma\_9628550\_nt1421\_Genome\_Tile|1  
TCCTATTTACAAATGATTACTTCTGATTTTTTCAGCTTTGTATATTATTGCTTTAAGGCT  
>HPV50\_Gamma\_9628550\_nt1441\_Genome\_Tile|1  
TTCTGATTTTTTCAGCTTTGTATATTATTGCTTTAAGGCTGCTAAGAGCAGAGAGACTGT  
>HPV50\_Gamma\_9628550\_nt1461\_Genome\_Tile|1  
ATATTATTTGCTTTAAGGCTGCTAAGAGCAGAGAGACTGTTGTTAAATTGATTAATAGCT  
>HPV50\_Gamma\_9628550\_nt1481\_Genome\_Tile|1  
GCTAAGAGCAGAGAGACTGTTGTTAAATTGATTAATAGCTTGCTAAATACAAAAGAGGAA  
>HPV50\_Gamma\_9628550\_nt1501\_Genome\_Tile|1  
TGTTAAATTGATTAATAGCTTGCTAAATACAAAAGAGGAACAAGTACTATGTGATCCTCC  
>HPV50\_Gamma\_9628550\_nt1521\_Genome\_Tile|1

TGCTAAATACAAAAGAGGAACAAGTACTATGTGATCCTCCTAAAATAAAAAGTATGGCTG  
>HPV50\_Gamma\_9628550\_nt1541\_Genome\_Tile|1  
CAAGTACTATGTGATCCTCCTAAAATAAAAAGTATGGCTGCAGCATTATATTGCTATAAA  
>HPV50\_Gamma\_9628550\_nt1561\_Genome\_Tile|1  
TAAAATAAAAAGTATGGCTGCAGCATTATATTGCTATAAAAAGGTAATAGCAGATACCTG  
>HPV50\_Gamma\_9628550\_nt1581\_Genome\_Tile|1  
CAGCATTATATTGCTATAAAAAGGTAATAGCAGATACCTGTTATAAATATGGAGACTTTC  
>HPV50\_Gamma\_9628550\_nt1601\_Genome\_Tile|1  
AAGGTAATAGCAGATACCTGTTATAAATATGGAGACTTTCCTGACTGGATAGCCACACAT  
>HPV50\_Gamma\_9628550\_nt1621\_Genome\_Tile|1  
TTATAAATATGGAGACTTTCCTGACTGGATAGCCACACATACTGTTATAAATCATCAGCT  
>HPV50\_Gamma\_9628550\_nt1641\_Genome\_Tile|1  
CTGACTGGATAGCCACACATACTGTTATAAATCATCAGCTAGCAACTGCAGACAGCTTTA  
>HPV50\_Gamma\_9628550\_nt1721\_Genome\_Tile|1  
TGGGCATACGATAATGATATGCTGGATGAAGCTGCAATTGCTTACAATTATGCGTGCTAT  
>HPV50\_Gamma\_9628550\_nt1741\_Genome\_Tile|1  
GCTGGATGAAGCTGCAATTGCTTACAATTATGCGTGCTATGCAAGTGAAAATGAAAATGC  
>HPV50\_Gamma\_9628550\_nt1761\_Genome\_Tile|1  
CTTACAATTATGCGTGCTATGCAAGTGAAAATGAAAATGCAGCTGCATTTTTACAACTA  
>HPV50\_Gamma\_9628550\_nt1821\_Genome\_Tile|1  
ATAGTCAATTAAAGTATGTTAAGGAATGTTGTGCAATGGTCAGGTTATACAAAAAGCAAG  
>HPV50\_Gamma\_9628550\_nt1841\_Genome\_Tile|1  
AAGGAATGTTGTGCAATGGTCAGGTTATACAAAAAGCAAGAAATGAGGAATATGACTATG  
>HPV50\_Gamma\_9628550\_nt1861\_Genome\_Tile|1  
CAGGTTATACAAAAAGCAAGAAATGAGGAATATGACTATGCCAGAATGGATTAAATCATG  
>HPV50\_Gamma\_9628550\_nt1921\_Genome\_Tile|1  
TTTCACAAATAATTATAATTCTGATGATTGGAAAGTTATTGTAAGATATTTAAATATCA  
>HPV50\_Gamma\_9628550\_nt2001\_Genome\_Tile|1  
TTTTGTAGCTTTAAAGTTACTTTTAAAAGGCATACCTAAAAAATGTGCTTAGTTATTT  
>HPV50\_Gamma\_9628550\_nt2081\_Genome\_Tile|1  
AAGTCATACTTTTGTATCAATTTATTCAGTTTATGAGAGGAAAAGTTGTATCCTTCATG  
>HPV50\_Gamma\_9628550\_nt2101\_Genome\_Tile|1  
ATTTATTTCAGTTTATGAGAGGAAAAGTTGTATCCTTCATGAACAAAAATAGTCATTTTTG  
>HPV50\_Gamma\_9628550\_nt2121\_Genome\_Tile|1  
GAAAAGTTGTATCCTTCATGAACAAAAATAGTCATTTTTTGTTAATGCCTTTATTAGATT  
>HPV50\_Gamma\_9628550\_nt2141\_Genome\_Tile|1  
AACAAAAATAGTCATTTTTTGTTAATGCCTTTATTAGATTCAAAAAATAGGATTTTTAGAT  
>HPV50\_Gamma\_9628550\_nt2161\_Genome\_Tile|1  
GTTAATGCCTTTATTAGATTCAAAAAATAGGATTTTTAGATGATGCAACTCAATGTTGTTG  
>HPV50\_Gamma\_9628550\_nt2221\_Genome\_Tile|1  
GATGTATTTGGACACACATGAGAAATGCATTTGATGGTAATGCAGTTTCTGTTGATGT  
>HPV50\_Gamma\_9628550\_nt2261\_Genome\_Tile|1  
AATGCAGTTTCTGTTGATGTGAAACATAAAAAATTTACAACAAATAGTTTACCACCTATG  
>HPV50\_Gamma\_9628550\_nt2281\_Genome\_Tile|1  
GAAACATAAAAAATTTACAACAAATAGTTTACCACCTATGTTAATAACAACAAATTGTGA  
>HPV50\_Gamma\_9628550\_nt2301\_Genome\_Tile|1  
AAATAGTTTACCACCTATGTTAATAACAACAAATTGTGATGTATGCAGAGATCCAACGT  
>HPV50\_Gamma\_9628550\_nt2321\_Genome\_Tile|1  
TTAATAACAACAAATTGTGATGTATGCAGAGATCCAACGTTTATGTACTTAAGGAGTAGA  
>HPV50\_Gamma\_9628550\_nt2341\_Genome\_Tile|1  
TGTATGCAGAGATCCAACGTTTATGTACTTAAGGAGTAGATTAAACATGTTTTAACTTTCC  
>HPV50\_Gamma\_9628550\_nt2361\_Genome\_Tile|1  
TTATGTACTTAAGGAGTAGATTAAACATGTTTTAACTTTCCAAATAAGTTACCATTGTATG  
>HPV50\_Gamma\_9628550\_nt2381\_Genome\_Tile|1  
TTAACATGTTTTAACTTTCCAAATAAGTTACCATTGTATGAAAATGGAGAACCAAAATTT

>HPV50\_Gamma\_9628550\_nt2401\_Genome\_Tile|1  
AAATAAGTTACCATTGTATGAAAATGGAGAACC AAAATTTAAATTTACTGATAATTGCTG  
>HPV50\_Gamma\_9628550\_nt2421\_Genome\_Tile|1  
AAAATGGAGAACC AAAATTTAAATTTACTGATAATTGCTGGACGCTCTTTTTTTAGCAAGT  
>HPV50\_Gamma\_9628550\_nt2461\_Genome\_Tile|1  
GACGCTCTTTTTTTAGCAAGTTTTTGAAGCACTTAGATTTACCTGAAGATGACCCAGATGG  
>HPV50\_Gamma\_9628550\_nt2561\_Genome\_Tile|1  
AGACATTCAATTGAATCTGATTGAAAAAGATTCAAAAAATTTAAAAGACCATATAGACTA  
>HPV50\_Gamma\_9628550\_nt2581\_Genome\_Tile|1  
TTGAAAAAGATTCAAAAAATTTAAAAGACCATATAGACTATTGGGAATCTATGAGAAAAG  
>HPV50\_Gamma\_9628550\_nt2601\_Genome\_Tile|1  
TTAAAAGACCATATAGACTATTGGGAATCTATGAGAAAAGAACAAGTGCTTGCATTTTAT  
>HPV50\_Gamma\_9628550\_nt2621\_Genome\_Tile|1  
TTGGGAATCTATGAGAAAAGAACAAGTGCTTGCATTTTATGCAAAAAAGAAAATATGAG  
>HPV50\_Gamma\_9628550\_nt2641\_Genome\_Tile|1  
AACAAGTGCTTGCATTTTATGCAAAAAAGAAAATATGAGCAGGCTTGGATTACAACCTC  
>HPV50\_Gamma\_9628550\_nt2661\_Genome\_Tile|1  
GCAAAAAAGAAAATATGAGCAGGCTTGGATTACAACCTCTTCCTCCTGCTAAGGTTTCT  
>HPV50\_Gamma\_9628550\_nt2701\_Genome\_Tile|1  
TTCCTCCTGCTAAGGTTTCTGAGCAAAAAGCAAAAGATGCAATTAGAATTCAATTACTTT  
>HPV50\_Gamma\_9628550\_nt2741\_Genome\_Tile|1  
AATTAGAATTC AATTACTTTTGCAATCCTTGTATAAGTCTGATTTTGGGTCTGAACCATG  
>HPV50\_Gamma\_9628550\_nt2761\_Genome\_Tile|1  
TGCAATCCTTGTATAAGTCTGATTTTGGGTCTGAACCATGGACTTTATCAGAATGTAGTT  
>HPV50\_Gamma\_9628550\_nt2781\_Genome\_Tile|1  
GATTTTGGGTCTGAACCATGGACTTTATCAGAATGTAGTTTAGAAATGTTAAATGCACCT  
>HPV50\_Gamma\_9628550\_nt2801\_Genome\_Tile|1  
GACTTTATCAGAATGTAGTTTAGAAATGTTAAATGCACCTCCTAGAAATGTTTTAAAAA  
>HPV50\_Gamma\_9628550\_nt2821\_Genome\_Tile|1  
TAGAAATGTTAAATGCACCTCCTAGAAATGTTTTAAAAAACAACCGTTTACTGTAACTG  
>HPV50\_Gamma\_9628550\_nt2901\_Genome\_Tile|1  
AAAAATGTGTATCCTTATATATGTTATGAATATATATATTATCAAGATGATAGAGACAAA  
>HPV50\_Gamma\_9628550\_nt2921\_Genome\_Tile|1  
ATGTTATGAATATATATATTATCAAGATGATAGAGACAAATGGCATAAAGTTAAAGGTCT  
>HPV50\_Gamma\_9628550\_nt2961\_Genome\_Tile|1  
TGGCATAAAGTTAAAGGTCTAGTGGATCACAATGGCCTTTATTTTAAAGAAGTGACTGGT  
>HPV50\_Gamma\_9628550\_nt2981\_Genome\_Tile|1  
AGTGGATCACAATGGCCTTTATTTTAAAGAAGTGACTGGTGATTCAGTATACTTTAAACT  
>HPV50\_Gamma\_9628550\_nt3001\_Genome\_Tile|1  
ATTTTAAAGAAGTGACTGGTGATTCAGTATACTTTAAACTCTTTCAACCTGATGCCACTG  
>HPV50\_Gamma\_9628550\_nt3101\_Genome\_Tile|1  
CAAACTATTCATTCCTCTGTCACTAGCTCCTCAAGGAGTGCGTTTGGGCCTGCTGACGA  
>HPV50\_Gamma\_9628550\_nt3121\_Genome\_Tile|1  
TCACTAGCTCCTCAAGGAGTGCGTTTGGGCCTGCTGACGAACAGCCCGGCCTTCCACAT  
>HPV50\_Gamma\_9628550\_nt3181\_Genome\_Tile|1  
CGTACGACAAGAGCCAACAGGAAAGATCTGGAAGCGGTCAACCAAAAGCCCTACAGGACA  
>HPV50\_Gamma\_9628550\_nt3201\_Genome\_Tile|1  
GAAAGATCTGGAAGCGGTCAACCAAAAGCCCTACAGGACACCGAACCCACCTCGACA  
>HPV50\_Gamma\_9628550\_nt3221\_Genome\_Tile|1  
ACCAAAAGCCCTACAGGACACCGAACCCACCTCGACATCAACAGTACGACTTTCGACG  
>HPV50\_Gamma\_9628550\_nt3241\_Genome\_Tile|1  
CCGAACCAACCCACCTCGACATCAACAGTACGACTTCGACGAGGACGACGAGAAAGAGAAC  
>HPV50\_Gamma\_9628550\_nt3281\_Genome\_Tile|1  
AGGACGACGAGAAAGAGAACACCATTCTACAGACACAGAAAGTCACAATCAGAATTGGG  
>HPV50\_Gamma\_9628550\_nt3301\_Genome\_Tile|1

ACCATTCCTACAGACACAGAAAGTCACAATCAGAATTGGGAGCCGACTCTGCGCCAACTC  
>HPV50\_Gamma\_9628550\_nt3361\_Genome\_Tile|1  
CTGAAGAAGTGGGAAGAAGATCTCACACAGTTGCAGCGCATGGTCTGTCAAGACTTAGAC  
>HPV50\_Gamma\_9628550\_nt3441\_Genome\_Tile|1  
GATCCACCAGTCCCTAATTATTACAGGTCAACAGAATAATCTTAAATGTTGGAGGTATAGG  
>HPV50\_Gamma\_9628550\_nt3481\_Genome\_Tile|1  
TTAAATGTTGGAGGTATAGGTTCTCACAAAAATATGCAGATCTCTATGAGTGTTGTAGCT  
>HPV50\_Gamma\_9628550\_nt3501\_Genome\_Tile|1  
TTCTCACAAAAATATGCAGATCTCTATGAGTGTTGTAGCTCTGCATGGAAGTGGTTGGGC  
>HPV50\_Gamma\_9628550\_nt3521\_Genome\_Tile|1  
TCTCTATGAGTGTTGTAGCTCTGCATGGAAGTGGTTGGGCCCAAAATCAGAGGGATACAG  
>HPV50\_Gamma\_9628550\_nt3541\_Genome\_Tile|1  
CTGCATGGAAGTGGTTGGGCCCAAAATCAGAGGGATACAGGGGTGATGCTAAATTGCTTA  
>HPV50\_Gamma\_9628550\_nt3561\_Genome\_Tile|1  
CCAAAATCAGAGGGATACAGGGGTGATGCTAAATTGCTTATTGCTTTTAAAAATCCTGAA  
>HPV50\_Gamma\_9628550\_nt3581\_Genome\_Tile|1  
GGGTGATGCTAAATTGCTTATTGCTTTTAAAAATCCTGAACAAAGGCTATCTTTTTTAAA  
>HPV50\_Gamma\_9628550\_nt3641\_Genome\_Tile|1  
CACTGTTGGATTACCCAAAAATACTACGTACTCTATGGGACATTTGGACTCTCTATAATG  
>HPV50\_Gamma\_9628550\_nt3841\_Genome\_Tile|1  
ATACTTTGGCAATTTGGGAATTGGAACAGGAAGAGGAAGTGGGGTACTTTTGGCTATAG  
>HPV50\_Gamma\_9628550\_nt3881\_Genome\_Tile|1  
GGGGGTACTTTTGGCTATAGACCTTTTGGGGCCCTGGGTCTGGAAGGCCAACTCAGGAA  
>HPV50\_Gamma\_9628550\_nt3901\_Genome\_Tile|1  
ACCTTTTGGGGCCCTGGGTCTGGAAGGCCAACTCAGGAAGTACCTATCGCAAGACCAA  
>HPV50\_Gamma\_9628550\_nt3941\_Genome\_Tile|1  
CTACCTATCGCAAGACCAAATGTTGTTATAGATCCATTAGGGCCAGCGCCTATTGTACCA  
>HPV50\_Gamma\_9628550\_nt3981\_Genome\_Tile|1  
GGCCAGCGCCTATTGTACCAGTAGATCCCTCTGCAGCTTCAATAGTTCCATTAGTAGAAG  
>HPV50\_Gamma\_9628550\_nt4001\_Genome\_Tile|1  
GTAGATCCCTCTGCAGCTTCAATAGTTCCATTAGTAGAAGGCGCCCTGATGTTGGATTT  
>HPV50\_Gamma\_9628550\_nt4061\_Genome\_Tile|1  
GCAGCTCCAGATGCTGGACCTGCAGCAGGTGGAAGTATGATATTGAATTATATACTATAACA  
>HPV50\_Gamma\_9628550\_nt4081\_Genome\_Tile|1  
TGCAGCAGGTGGAAGTATGATATTGAATTATATACTATAACAAATTCCACAACAGATGTTGG  
>HPV50\_Gamma\_9628550\_nt4121\_Genome\_Tile|1  
AATTCCACAACAGATGTTGGTGCTGTTGGTGGTGGGCCCACTGTTACCTCTAACGAAGAA  
>HPV50\_Gamma\_9628550\_nt4141\_Genome\_Tile|1  
TGCTGTTGGTGGTGGGCCCACTGTTACCTCTAACGAAGAATTTGAAGTAGCTGTTATAGA  
>HPV50\_Gamma\_9628550\_nt4181\_Genome\_Tile|1  
TTTGAAGTAGCTGTTATAGATGCACAACCAATTGCACCCTATCCAAAGCAATTATTATAT  
>HPV50\_Gamma\_9628550\_nt4221\_Genome\_Tile|1  
ATCCAAAGCAATTATTATATGACTCTACTATAGCAGCAACTTTTGAAACACAGATTAATC  
>HPV50\_Gamma\_9628550\_nt4241\_Genome\_Tile|1  
GACTCTACTATAGCAGCAACTTTTGAAACACAGATTAATCCCTTCATAAATCCAGACATA  
>HPV50\_Gamma\_9628550\_nt4261\_Genome\_Tile|1  
TTTTGAAACACAGATTAATCCCTTCATAAATCCAGACATAAATAATGTTAATGTATTAGT  
>HPV50\_Gamma\_9628550\_nt4301\_Genome\_Tile|1  
AATAATGTTAATGTATTAGTTGACCCAGCTTTGCAGGAGACACTGTAGGTGACTACTTT  
>HPV50\_Gamma\_9628550\_nt4321\_Genome\_Tile|1  
TGACCCAGCTTTGCAGGAGACACTGTAGGTGACTACTTTTATGAAGAGATACCTTTGGA  
>HPV50\_Gamma\_9628550\_nt4341\_Genome\_Tile|1  
ACACTGTAGGTGACTACTTTTATGAAGAGATACCTTTGGAACGTTTAGATATTCAAACCT  
>HPV50\_Gamma\_9628550\_nt4381\_Genome\_Tile|1  
ACGTTTAGATATTCAAACCTTTGACATTTTAGAGCCACCTACTGAAAGCACGCCACCCA

>HPV50\_Gamma\_9628550\_nt4401\_Genome\_Tile|1  
TTGACATTTTAGAGCCACCTACTGAAAGCACGCCACCCAATTAGGTAATAGGTTTGT  
>HPV50\_Gamma\_9628550\_nt4441\_Genome\_Tile|1  
ATTAGGTAATAGGTTTGTCTAGGGCAAGAGATCTGTACAGTCGATTTGTTGCACAGCA  
>HPV50\_Gamma\_9628550\_nt4481\_Genome\_Tile|1  
AGTCGATTTGTTGCACAGCAGCCAATATCTGAGCCAGATTTTTTGTAGTCAACCTTCCCGC  
>HPV50\_Gamma\_9628550\_nt4501\_Genome\_Tile|1  
GCCAATATCTGAGCCAGATTTTTTGTAGTCAACCTTCCCGCCTTGTTCAGTTTGAATATAG  
>HPV50\_Gamma\_9628550\_nt4541\_Genome\_Tile|1  
CTTGTTCAGTTTGAATATAGAAATCCCGCCTTTGACCCAGATGTGAGCCTATACTTTGAG  
>HPV50\_Gamma\_9628550\_nt4621\_Genome\_Tile|1  
GGCAGCGCCATTGCAGGAATTTGCTGATGTAGTTTATTTAGGCAGGCCAAGAGTATCCAG  
>HPV50\_Gamma\_9628550\_nt4641\_Genome\_Tile|1  
TTGCTGATGTAGTTTATTTAGGCAGGCCAAGAGTATCCAGCACCTCAGAAGGTACAATAA  
>HPV50\_Gamma\_9628550\_nt4661\_Genome\_Tile|1  
GGCAGGCCAAGAGTATCCAGCACCTCAGAAGGTACAATAAGAGTAAGTAGATTAGGTACC  
>HPV50\_Gamma\_9628550\_nt4681\_Genome\_Tile|1  
CACCTCAGAAGGTACAATAAGAGTAAGTAGATTAGGTACCAGAGCAGCTTTAACAACACG  
>HPV50\_Gamma\_9628550\_nt4701\_Genome\_Tile|1  
GAGTAAGTAGATTAGGTACCAGAGCAGCTTTAACAACACGTAGTGGTCTTTCTGTGGGAC  
>HPV50\_Gamma\_9628550\_nt4721\_Genome\_Tile|1  
AGAGCAGCTTTAACAACACGTAGTGGTCTTTCTGTGGGACCTCAGGTACACTTTTATATG  
>HPV50\_Gamma\_9628550\_nt4741\_Genome\_Tile|1  
TAGTGGTCTTTCTGTGGGACCTCAGGTACACTTTTATATGGATTTAAGTGATATACCTCC  
>HPV50\_Gamma\_9628550\_nt4781\_Genome\_Tile|1  
GATTTAAGTGATATACCTCCAGAGGATTCTATAGAGTTGCATACATTAAACGTTACACCA  
>HPV50\_Gamma\_9628550\_nt4801\_Genome\_Tile|1  
AGAGGATTCTATAGAGTTGCATACATTAAACGTTACACCACAAACAAGTACAATTGTAGA  
>HPV50\_Gamma\_9628550\_nt4821\_Genome\_Tile|1  
ATACATTAAACGTTACACCACAAACAAGTACAATTGTAGATGATATATTAGCAACAACCTA  
>HPV50\_Gamma\_9628550\_nt4841\_Genome\_Tile|1  
CAAACAAGTACAATTGTAGATGATATATTAGCAACAACCTACATTTGATGATCCTGCAAAC  
>HPV50\_Gamma\_9628550\_nt4861\_Genome\_Tile|1  
TGATATATTAGCAACAACCTACATTTGATGATCCTGCAAACCTCCTTATTTACACAGTTTAA  
>HPV50\_Gamma\_9628550\_nt4881\_Genome\_Tile|1  
CATTTGATGATCCTGCAAACCTCCTTATTTACACAGTTTAAATGAAGATGTATTAACAGACG  
>HPV50\_Gamma\_9628550\_nt4901\_Genome\_Tile|1  
TCCTTATTTACACAGTTTAAATGAAGATGTATTAACAGACGATGTTGAACATAATTTTACA  
>HPV50\_Gamma\_9628550\_nt4921\_Genome\_Tile|1  
TGAAGATGTATTAACAGACGATGTTGAACATAATTTTACAGAGTCTCATTTAGTTATACC  
>HPV50\_Gamma\_9628550\_nt4941\_Genome\_Tile|1  
ATGTTGAACATAATTTTACAGAGTCTCATTTAGTTATACCAGCTACTGATGAAGAAAATG  
>HPV50\_Gamma\_9628550\_nt4961\_Genome\_Tile|1  
GAGTCTCATTTAGTTATACCAGCTACTGATGAAGAAAATGACACAGCAATAAATATTATT  
>HPV50\_Gamma\_9628550\_nt5021\_Genome\_Tile|1  
AATTTAAGAAATATTCCTCTTACTGTGGGCATGAATTCAGGTGACATATCTACTACATTA  
>HPV50\_Gamma\_9628550\_nt5041\_Genome\_Tile|1  
TACTGTGGGCATGAATTCAGGTGACATATCTACTACATTATCAGATTATAATATTTTAGA  
>HPV50\_Gamma\_9628550\_nt5061\_Genome\_Tile|1  
GTGACATATCTACTACATTATCAGATTATAATATTTTAGATGCATCCTTGATAGTAAAAT  
>HPV50\_Gamma\_9628550\_nt5081\_Genome\_Tile|1  
TCAGATTATAATATTTTAGATGCATCCTTGATAGTAAAATCAAATGTTTCTGAACAGCCC  
>HPV50\_Gamma\_9628550\_nt5101\_Genome\_Tile|1  
TGCATCCTTGATAGTAAAATCAAATGTTTCTGAACAGCCCCTTTTGTTTTAGATTATTC  
>HPV50\_Gamma\_9628550\_nt5141\_Genome\_Tile|1

CTTTTTGTTTGTAGATTATTCAGATTATGATTACATCCAGGTCTTCTTCCAAAAAGAAGA  
>HPV50\_Gamma\_9628550\_nt5161\_Genome\_Tile|1  
AGATTATGATTACATCCAGGTCTTCTTCCAAAAAGAAGACGCATAGATTATTTTAAATT  
>HPV50\_Gamma\_9628550\_nt5221\_Genome\_Tile|1  
TATTTTACAGATGGCTCATTGGTCCTCAACCTCTGGAAAGTTATACCTTCCACCAAGTAC  
>HPV50\_Gamma\_9628550\_nt6721\_Genome\_Tile|1  
AACTGATTACACTGTTGCTACAGTTTCCAAACCAAACAAGAGAAAACGTACCAGATAAGC  
>HPV50\_Gamma\_9628550\_nt6761\_Genome\_Tile|1  
AGAAAACGTACCAGATAAGCTGCTGACATGCTTTCTTGGCTTTACTGTGAATATTGTACT  
>HPV50\_Gamma\_9628550\_nt6781\_Genome\_Tile|1  
TGCTGACATGCTTTCCTTGGCTTTACTGTGAATATTGTACTGTGAATTCTATACTGTGAAT  
>HPV50\_Gamma\_9628550\_nt6801\_Genome\_Tile|1  
TTTACTGTGAATATTGTACTGTGAATTCTATACTGTGAATGCTTTAGATCTGAGTCTTGA  
>HPV50\_Gamma\_9628550\_nt6821\_Genome\_Tile|1  
GTGAATTCTATACTGTGAATGCTTTAGATCTGAGTCTTGAACATTTACAAAAATGAATAA  
>HPV50\_Gamma\_9628550\_nt6901\_Genome\_Tile|1  
GGTGTGTGTTGTCCTTGTAGTCAGAGTTATTTACTCCCGCCCTTTGTAGTATAAATATGTT  
>HPV50\_Gamma\_9628550\_nt6921\_Genome\_Tile|1  
CAGAGTTATTTACTCCCGCCCTTTGTAGTATAAATATGTTGCACCTCTGTGATCAATCAT  
>HPV50\_Gamma\_9628550\_nt6941\_Genome\_Tile|1  
CTTTGTAGTATAAATATGTTGCACCTCTGTGATCAATCATGTTGACCAGCTGGACGTGCT  
>HPV50\_Gamma\_9628550\_nt7041\_Genome\_Tile|1  
AAGTTTGTATGCCTTTAGGGAATATAAAGCGACCGAAGTCGGTACTTGCTAACAAAGATA  
>HPV50\_Gamma\_9628550\_nt7081\_Genome\_Tile|1  
GGTACTTGCTAACAAAGATAAATCTCACGAGTTAGAACAAACCTCTGAGTCACCTCAGT  
>HPV50\_Gamma\_9628550\_nt7101\_Genome\_Tile|1  
AAATCTCACGAGTTAGAACAAACCTCTGAGTCACCTCAGTGCAGCTGGCAGAAGAAAGTA  
>HPV48\_Gamma\_9628542\_nt0001\_Genome\_Tile|1  
TCTGACGCATAATAATTGTTGGCAACAATCGTGCATAATAAAGTGGAGACGAGTACAGTA  
>HPV48\_Gamma\_9628542\_nt0021\_Genome\_Tile|1  
GGCAACAATCGTGCATAATAAAGTGGAGACGAGTATCATATAAATACTGCTGAAC  
>HPV48\_Gamma\_9628542\_nt0061\_Genome\_Tile|1  
TCATATAAATACTGCTGAACAGTAGATTTCTTCAGAAGCTGATGGAGCCACAATTTCTTA  
>HPV48\_Gamma\_9628542\_nt0081\_Genome\_Tile|1  
AGTAGATTTCTTCAGAAGCTGATGGAGCCACAATTTCTTACTGATTTGGATTTCATACTGC  
>HPV48\_Gamma\_9628542\_nt0101\_Genome\_Tile|1  
GATGGAGCCACAATTTCTTACTGATTTGGATTTCATACTGCAATATTTTAACATAAGCTT  
>HPV48\_Gamma\_9628542\_nt0121\_Genome\_Tile|1  
CTGATTTGGATTTCATACTGCAATATTTTAACATAAGCTTTTTTGGACTTAGTTCCTAAGT  
>HPV48\_Gamma\_9628542\_nt0141\_Genome\_Tile|1  
AAATATTTTAACATAAGCTTTTTTGGACTTAGTTCCTAAGTGTATCTTTTGTAAATTTTCT  
>HPV48\_Gamma\_9628542\_nt0161\_Genome\_Tile|1  
TTTTGGACTTAGTTCCTAAGTGTATCTTTTGTAAATTTTCTGTATCTATTGTTGATCTTGC  
>HPV48\_Gamma\_9628542\_nt0181\_Genome\_Tile|1  
GTATCTTTTGTAAATTTTCTGTATCTATTGTTGATCTTGCTTCTTTTCATAACAAACGAC  
>HPV48\_Gamma\_9628542\_nt0201\_Genome\_Tile|1  
GTATCTATTGTTGATCTTGCTTCTTTTCATAACAAACGACTGTCTGTAATTTGGAGAGAT  
>HPV48\_Gamma\_9628542\_nt0221\_Genome\_Tile|1  
TTCTTTTCATAACAAACGACTGTCTGTAATTTGGAGAGATAATACACCATTTGCATGTTG  
>HPV48\_Gamma\_9628542\_nt0241\_Genome\_Tile|1  
TGTCTGTAATTTGGAGAGATAATACACCATTTGCATGTTGTACTAAATGTTTAAGATTAA  
>HPV48\_Gamma\_9628542\_nt0261\_Genome\_Tile|1  
AATACACCATTTGCATGTTGTACTAAATGTTTAAGATTAACTGCATTATATGAAAAAGAT  
>HPV48\_Gamma\_9628542\_nt0281\_Genome\_Tile|1  
TACTAAATGTTTAAGATTAACTGCATTATATGAAAAAGATAATTTTTTTGTCTGTACTGC



>HPV48\_Gamma\_9628542\_nt0301\_Genome\_Tile|1  
CTGCATTATATGAAAAAGATAATTTTTTTGTCTGTACTGCAAAAAGTCATTTGTTAACTG  
>HPV48\_Gamma\_9628542\_nt0361\_Genome\_Tile|1  
GTTTAGTTAAAAAGGAATTGTCAGATATTAATATTAGGTGCCAACATTGTTATTCATTTT  
>HPV48\_Gamma\_9628542\_nt0461\_Genome\_Tile|1  
TGATTTTCTGTTAATTCGCGGGACTTGGAGAGGTGTTTGTAGAAATTGTATCAGCCATGA  
>HPV48\_Gamma\_9628542\_nt0541\_Genome\_Tile|1  
CCTGACATAGAGTTAGAAGAGCTTGTTTTGCCTGCTAACTTAATTTCTGACGAGTCATTG  
>HPV48\_Gamma\_9628542\_nt0561\_Genome\_Tile|1  
GCTTGTTTTGCCTGCTAACTTAATTTCTGACGAGTCATTGTCCACCAGATGCTACTGCAGA  
>HPV48\_Gamma\_9628542\_nt0581\_Genome\_Tile|1  
TAATTTCTGACGAGTCATTGTCCACCAGATGCTACTGCAGAGGAGGAGTTTTGTCCGTACC  
>HPV48\_Gamma\_9628542\_nt0661\_Genome\_Tile|1  
AATTGTGGCTGTCGCATAAGGGTGACAGTCGCTGCAACTGAATTTGGAATACGTTGTTTT  
>HPV48\_Gamma\_9628542\_nt0681\_Genome\_Tile|1  
GGTGACAGTCGCTGCAACTGAATTTGGAATACGTTGTTTTGAGCAACTGTTACTGAAAGA  
>HPV48\_Gamma\_9628542\_nt0701\_Genome\_Tile|1  
AATTTGGAATACGTTGTTTTGAGCAACTGTTACTGAAAGAGCTTTGTTTATTTTGTCCCTG  
>HPV48\_Gamma\_9628542\_nt0741\_Genome\_Tile|1  
GCTTTGTTTATTTTGTCCGTGCTCCAGACAACCTCCCCGCAATGGCAGATCATAAAG  
>HPV48\_Gamma\_9628542\_nt0781\_Genome\_Tile|1  
CGCAATGGCAGATCATAAAGGTACTGATAATATTGATCATAATGATGTTTTAGATGGGTC  
>HPV48\_Gamma\_9628542\_nt0801\_Genome\_Tile|1  
GTACTGATAATATTGATCATAATGATGTTTTAGATGGGTCTTGGTGTTTAATAACTGAAG  
>HPV48\_Gamma\_9628542\_nt0821\_Genome\_Tile|1  
AATGATGTTTTAGATGGGTCTTGGTGTTTAATAACTGAAGCTGAATGTGAGGACGATACG  
>HPV48\_Gamma\_9628542\_nt0841\_Genome\_Tile|1  
TTGGTGTTTAATAACTGAAGCTGAATGTGAGGACGATACGTTAGTGGATTGTGTTGAGGA  
>HPV48\_Gamma\_9628542\_nt0861\_Genome\_Tile|1  
CTGAATGTGAGGACGATACGTTAGTGGATTGTGTTGAGGAGAGCACAAATGACTCTGTAG  
>HPV48\_Gamma\_9628542\_nt0881\_Genome\_Tile|1  
TTAGTGGATTGTGTTGAGGAGAGCACAAATGACTCTGTAGTTTCGAATCTGTTAGACGAT  
>HPV48\_Gamma\_9628542\_nt0901\_Genome\_Tile|1  
GAGCACAAATGACTCTGTAGTTTCGAATCTGTTAGACGATTCCGAAAGTATAATTCAGGG  
>HPV48\_Gamma\_9628542\_nt0921\_Genome\_Tile|1  
TTTCGAATCTGTTAGACGATTCCGAAAGTATAATTCAGGGGAATTCTGAGGAAAGTGACC  
>HPV48\_Gamma\_9628542\_nt0941\_Genome\_Tile|1  
TCCGAAAGTATAATTCAGGGGAATTCTGAGGAAAGTGACCGCTGTATTCAGGAGCTAAAA  
>HPV48\_Gamma\_9628542\_nt0961\_Genome\_Tile|1  
GAATTCTGAGGAAAGTGACCGCTGTATTCAGGAGCTAAAAAGAAAGTTAAATGTTACTCC  
>HPV48\_Gamma\_9628542\_nt0981\_Genome\_Tile|1  
GCTGTATTCAGGAGCTAAAAAGAAAGTTAAATGTTACTCCTGAAAAACAGATCTCAGAGC  
>HPV48\_Gamma\_9628542\_nt1001\_Genome\_Tile|1  
AGAAAGTTAAATGTTACTCCTGAAAAACAGATCTCAGAGCTAAGTCCGCGGTTATCGGCA  
>HPV48\_Gamma\_9628542\_nt1021\_Genome\_Tile|1  
TGAAAAACAGATCTCAGAGCTAAGTCCGCGGTTATCGGCAGTGCATATAACGCCTGAGAG  
>HPV48\_Gamma\_9628542\_nt1041\_Genome\_Tile|1  
TAAGTCCGCGGTTATCGGCAGTGCATATAACGCCTGAGAGAGCATCTAAGCGGAGACTGT  
>HPV48\_Gamma\_9628542\_nt1061\_Genome\_Tile|1  
GTGCATATAACGCCTGAGAGAGCATCTAAGCGGAGACTGTTTAAATGATAGTGGAGTTGTT  
>HPV48\_Gamma\_9628542\_nt1121\_Genome\_Tile|1  
GAAGATGAAGCTGAAAGTAATACTATTTCAGGTAGATTCACTGTTGGTGAAAAAGACGCG  
>HPV48\_Gamma\_9628542\_nt1181\_Genome\_Tile|1  
GGAAATCAAAATGGCGCTGAGTGTGAACTTAATTTCTATTTTGCCTAGTAATAATATCAGA  
>HPV48\_Gamma\_9628542\_nt1201\_Genome\_Tile|1

GTGTGAACTTAATTCATTTTTCGCTAGTAATAATATCAGAGCTACTGTACTTTGCAAATT  
>HPV48\_Gamma\_9628542\_nt1221\_Genome\_Tile|1  
TGCGTAGTAATAATATCAGAGCTACTGTACTTTGCAAATTTAAAGATAAAATTTGGGGTTT  
>HPV48\_Gamma\_9628542\_nt1261\_Genome\_Tile|1  
TAAAGATAAAATTTGGGGTTTCATTTAATGAGCTTACAAGAAGTTTTAAAAGTGATAAGAC  
>HPV48\_Gamma\_9628542\_nt1301\_Genome\_Tile|1  
AGTTTTTAAAAGTGATAAGACATGTACACCAAATTTGGGTAATAACAGCAATAGGTATTAGA  
>HPV48\_Gamma\_9628542\_nt1321\_Genome\_Tile|1  
ATGTACACCAAATTTGGGTAATAACAGCAATAGGTATTAGAGAAGATTTACGAGATGCTTG  
>HPV48\_Gamma\_9628542\_nt1341\_Genome\_Tile|1  
TAACAGCAATAGGTATTAGAGAAGATTTACGAGATGCTTGTAAGTTTATTACAGCAAC  
>HPV48\_Gamma\_9628542\_nt1361\_Genome\_Tile|1  
GAAGATTTACGAGATGCTTGTAAGTTTATTACAGCAACATGTTGAGTTTTTAGAAATG  
>HPV48\_Gamma\_9628542\_nt1381\_Genome\_Tile|1  
TAAAGTTTTATTACAGCAACATGTTGAGTTTTTAGAAATGATTTGCAATGATTTTTCTGT  
>HPV48\_Gamma\_9628542\_nt1401\_Genome\_Tile|1  
ATGTTGAGTTTTTAGAAATGATTTGCAATGATTTTTCTGTGCTACTATTGGTAGAATTTA  
>HPV48\_Gamma\_9628542\_nt1421\_Genome\_Tile|1  
ATTTGCAATGATTTTTCTGTGCTACTATTGGTAGAATTTAAGGTAACATAAAATAGAGAA  
>HPV48\_Gamma\_9628542\_nt1441\_Genome\_Tile|1  
GCTACTATTGGTAGAATTTAAGGTAACATAAAATAGAGAAACGGTTTTAAAGTTAATGTG  
>HPV48\_Gamma\_9628542\_nt1461\_Genome\_Tile|1  
AGGTAACATAAAATAGAGAAACGGTTTTAAAGTTAATGTGTAGTATGTTAAATGCTAAAG  
>HPV48\_Gamma\_9628542\_nt1481\_Genome\_Tile|1  
ACGGTTTTAAAGTTAATGTGTAGTATGTTAAATGCTAAAGAAGAACAATTTTGTGTGAA  
>HPV48\_Gamma\_9628542\_nt1501\_Genome\_Tile|1  
TAGTATGTTAAATGCTAAAGAAGAACAATTTTGTGTGAACCGCCAAAATTTGAAAAGTAC  
>HPV48\_Gamma\_9628542\_nt1521\_Genome\_Tile|1  
AAGAACAATTTTGTGTGAACCGCCAAAATTTGAAAAGTACAGCTGCAGCTTTATATTTCT  
>HPV48\_Gamma\_9628542\_nt1541\_Genome\_Tile|1  
CCGCCAAAATTTGAAAAGTACAGCTGCAGCTTTATATTTCTATAAGAAGATTATAACTGAT  
>HPV48\_Gamma\_9628542\_nt1561\_Genome\_Tile|1  
AGCTGCAGCTTTATATTTCTATAAGAAGATTATAACTGATACATGTTTTAAATATGGCAC  
>HPV48\_Gamma\_9628542\_nt1581\_Genome\_Tile|1  
ATAAGAAGATTATAACTGATACATGTTTTAAATATGGCACTTTGCCTTCCTGGGTTAGTA  
>HPV48\_Gamma\_9628542\_nt1601\_Genome\_Tile|1  
ACATGTTTTAAATATGGCACTTTGCCTTCCTGGGTTAGTAGATTAACTATAGTAGAACAT  
>HPV48\_Gamma\_9628542\_nt1641\_Genome\_Tile|1  
GATTAACTATAGTAGAACATCAGTTAGCTTCAGCAGACACATTTTCATTATCTGAAATGG  
>HPV48\_Gamma\_9628542\_nt1721\_Genome\_Tile|1  
GATTTTACTGAAGAAGCATCTGTTGCTTATAATTATGCATGTTATGCCACAGAAAATACA  
>HPV48\_Gamma\_9628542\_nt1921\_Genome\_Tile|1  
TATTGGTGAAGAGTGGAAAGAAATGTACAGTTTTTAAAATATCAGGGAGTAACTTTTT  
>HPV48\_Gamma\_9628542\_nt1961\_Genome\_Tile|1  
TATCAGGGAGTAACTTTTTAGAAATTTTAATAGCTTTAAACAATTTTTTAAATGCACT  
>HPV48\_Gamma\_9628542\_nt2081\_Genome\_Tile|1  
TTTAAATTAGTACAATTTTTGAAAGGTCAAGTTGTATCTTATATTAACAAATCGAGTCAG  
>HPV48\_Gamma\_9628542\_nt2101\_Genome\_Tile|1  
GAAAGGTCAAGTTGTATCTTATATTAACAAATCGAGTCAGTTTTGGTTAATGCCATTACA  
>HPV48\_Gamma\_9628542\_nt2121\_Genome\_Tile|1  
ATATTAACAAATCGAGTCAGTTTTTGGTTAATGCCATTACAAGATGCTAAAATTTGGTTTGT  
>HPV48\_Gamma\_9628542\_nt2241\_Genome\_Tile|1  
ATGGTAACACGTTTTTGTTTAGATATTAACATAAAAACCTGCAACAGACAAAACCTCCAC  
>HPV48\_Gamma\_9628542\_nt2261\_Genome\_Tile|1  
GATATTAAACATAAAAACCTGCAACAGACAAAACCTCCACCTATGATAATAACTACTAAT

>HPV48\_Gamma\_9628542\_nt2281\_Genome\_Tile|1  
GCAACAGACAAAACCTCCACCTATGATAATAACTACTAATGTTAATGTAACAACTGATGA  
>HPV48\_Gamma\_9628542\_nt2301\_Genome\_Tile|1  
CTATGATAATAACTACTAATGTTAATGTAACAACTGATGAATCTCTATTTTATTTGAGAA  
>HPV48\_Gamma\_9628542\_nt2321\_Genome\_Tile|1  
GTTAATGTAACAACTGATGAATCTCTATTTTATTTGAGAAGTAGACTTACGTGTTTCAAT  
>HPV48\_Gamma\_9628542\_nt2341\_Genome\_Tile|1  
ATCTCTATTTTATTTGAGAAGTAGACTTACGTGTTTCAATTTTCCGAATAAGTTACCAAT  
>HPV48\_Gamma\_9628542\_nt2361\_Genome\_Tile|1  
GTAGACTTACGTGTTTCAATTTTCCGAATAAGTTACCAATGTCTGACAAAGATGAACCTT  
>HPV48\_Gamma\_9628542\_nt2381\_Genome\_Tile|1  
TTTCCGAATAAGTTACCAATGTCTGACAAAGATGAACCTTGTGTTACCATTTCTGACAAA  
>HPV48\_Gamma\_9628542\_nt2521\_Genome\_Tile|1  
GCACCCGTTTGTCTGCACAGCAAGAAATTCAGTTGACTTTGATTGAAAAAGAATCTTATG  
>HPV48\_Gamma\_9628542\_nt2541\_Genome\_Tile|1  
CAAGAAATTCAGTTGACTTTGATTGAAAAAGAATCTTATGATCTTAAAGATCATTTAGCA  
>HPV48\_Gamma\_9628542\_nt2561\_Genome\_Tile|1  
GATTGAAAAAGAATCTTATGATCTTAAAGATCATTTAGCATACTGGAAAGCTGTAAGATT  
>HPV48\_Gamma\_9628542\_nt2581\_Genome\_Tile|1  
ATCTTAAAGATCATTTAGCATACTGGAAAGCTGTAAGATTAGAAAATGTTATTGCCTATT  
>HPV48\_Gamma\_9628542\_nt2601\_Genome\_Tile|1  
TACTGGAAAGCTGTAAGATTAGAAAATGTTATTGCCTATTATGCTAGAAAAGAACATATT  
>HPV48\_Gamma\_9628542\_nt2641\_Genome\_Tile|1  
ATGCTAGAAAAGAACATATTACTAAATTAGGTCTGCAGCCATTACCAACATTAGCTGTAA  
>HPV48\_Gamma\_9628542\_nt2701\_Genome\_Tile|1  
CTGAATATAAAGCAAAAGAAGCAATTAATATACAGCTGCTTATTCAAAGTTTATTGAAAT  
>HPV48\_Gamma\_9628542\_nt2741\_Genome\_Tile|1  
TATTCAAAGTTTATTGAAATCAGAGTTTGCCTTGGAAAGATGGACTCTTGCAGAAACTAG  
>HPV48\_Gamma\_9628542\_nt2761\_Genome\_Tile|1  
CAGAGTTTGCCTTGGAAAGATGGACTCTTGCAGAAACTAGTGCAGAAACTATAAACAGTT  
>HPV48\_Gamma\_9628542\_nt2781\_Genome\_Tile|1  
TGGACTCTTGCAGAAACTAGTGCAGAAACTATAAACAGTTCCCCCAGAAATTGTTTCAAA  
>HPV48\_Gamma\_9628542\_nt2801\_Genome\_Tile|1  
TGCAGAAACTATAAACAGTTCCCCCAGAAATTGTTTCAAAAAGTACCTTTCATTGTAA  
>HPV48\_Gamma\_9628542\_nt2821\_Genome\_Tile|1  
CCCCCAGAAATTGTTTCAAAAAGTACCTTTCATTGTAAATGTATGGTTTGATAATGATG  
>HPV48\_Gamma\_9628542\_nt2841\_Genome\_Tile|1  
AAAGTACCTTTCATTGTAAATGTATGGTTTGATAATGATGAAAGAAATTCCTTTCCTTAT  
>HPV48\_Gamma\_9628542\_nt2861\_Genome\_Tile|1  
TGTATGGTTTGATAATGATGAAAGAAATTCCTTTCCTTATACCTGTTGGGATTTTATATA  
>HPV48\_Gamma\_9628542\_nt2901\_Genome\_Tile|1  
ACCTGTTGGGATTTTATATATTATCAAGATGACCAAAACAAATGGCACAAGACTGAAGGG  
>HPV48\_Gamma\_9628542\_nt2921\_Genome\_Tile|1  
TTATCAAGATGACCAAAACAAATGGCACAAGACTGAAGGGCTGGTTGATCATAATGGATG  
>HPV48\_Gamma\_9628542\_nt2941\_Genome\_Tile|1  
AATGGCACAAGACTGAAGGGCTGGTTGATCATAATGGATGTTATTATGTAGATCTAAATG  
>HPV48\_Gamma\_9628542\_nt2961\_Genome\_Tile|1  
CTGGTTGATCATAATGGATGTTATTATGTAGATCTAAATGGTGATTTTGTATACTTTACT  
>HPV48\_Gamma\_9628542\_nt3101\_Genome\_Tile|1  
TGTTACTAGCTCCTCGAGAAATACAAATCCCTCTTCTGAAAGCAGGGTCGGGCTCTCGAC  
>HPV48\_Gamma\_9628542\_nt3121\_Genome\_Tile|1  
ATACAAATCCCTCTTCTGAAAGCAGGGTCGGGCTCTCGACCTCCAGCAGCTCGGAGAGCC  
>HPV48\_Gamma\_9628542\_nt3161\_Genome\_Tile|1  
CTCCAGCAGCTCGGAGAGCCCTCGAAGGAGACCGAGCATCTCAGAAAACCTCCAACACCGA  
>HPV48\_Gamma\_9628542\_nt3261\_Genome\_Tile|1

CGACGAGAACCGAGAGAATCTGGAACCAACGACACCACACCCAGAAGACGAGGAACAAAG  
>HPV48\_Gamma\_9628542\_nt3281\_Genome\_Tile|1  
TGGAACCAACGACACCACACCCAGAAGACGAGGAACAAAGAGGAAATTGGGGTCCGACTC  
>HPV48\_Gamma\_9628542\_nt3361\_Genome\_Tile|1  
TGGGATCAAGATCTACAACGCTTGCAAGACACGGTTACTCACGACTTGGACGATTACAGG  
>HPV48\_Gamma\_9628542\_nt3441\_Genome\_Tile|1  
TTAGTGTTATTTACAGGTCAACAAAATAATTTGAAATGTTGGAGAAATCGCTGTACTACA  
>HPV48\_Gamma\_9628542\_nt3461\_Genome\_Tile|1  
ACAAAATAATTTGAAATGTTGGAGAAATCGCTGTACTACAAAATATGCTAGTTTATTTTT  
>HPV48\_Gamma\_9628542\_nt3481\_Genome\_Tile|1  
GGAGAAATCGCTGTACTACAAAATATGCTAGTTTATTTTTATGCTTCAGCTCTGTTTGA  
>HPV48\_Gamma\_9628542\_nt3501\_Genome\_Tile|1  
AAATATGCTAGTTTATTTTTATGCTTCAGCTCTGTTTGGAAAGTGGCTTGGTCCTAATTCT  
>HPV48\_Gamma\_9628542\_nt3521\_Genome\_Tile|1  
ATGCTTCAGCTCTGTTTGGAAAGTGGCTTGGTCCTAATTCTGATGGGGGTGCTGCAAAAGT  
>HPV48\_Gamma\_9628542\_nt3541\_Genome\_Tile|1  
AGTGGCTTGGTCCTAATTCTGATGGGGGTGCTGCAAAAGTGTAGTTGCATTTAAAAGTG  
>HPV48\_Gamma\_9628542\_nt3561\_Genome\_Tile|1  
GATGGGGGTGCTGCAAAAGTGTTAGTTGCATTTAAAAGTGATGCCCAAAGACAAGTGTTT  
>HPV48\_Gamma\_9628542\_nt3581\_Genome\_Tile|1  
GTTAGTTGCATTTAAAAGTGATGCCCAAAGACAAGTGTTCTTAAACACAGTTCATATTCC  
>HPV48\_Gamma\_9628542\_nt3641\_Genome\_Tile|1  
TAAAGGAACACTATAACTCTGGGAAGACTTGACAGTTTATAATGTCCCTTACGTAGAAGA  
>HPV48\_Gamma\_9628542\_nt3661\_Genome\_Tile|1  
TGGGAAGACTTGACAGTTTATAATGTCCCTTACGTAGAAGAAAAAGAGCAAGTCCTACTGA  
>HPV48\_Gamma\_9628542\_nt3681\_Genome\_Tile|1  
TAATGTCCCTTACGTAGAAGAAAAAGAGCAAGTCCTACTGATCTTTATAAAACATGCTTGC  
>HPV48\_Gamma\_9628542\_nt3701\_Genome\_Tile|1  
AAAAGAGCAAGTCCTACTGATCTTTATAAAACATGCTTGCAAGGGGGGGACTGCATTCCT  
>HPV48\_Gamma\_9628542\_nt3821\_Genome\_Tile|1  
AGTTTGGTATATTTTGGAAATTTGGGAATAGGATCTGGAAAAGGGTCTGGGGGATCATTT  
>HPV48\_Gamma\_9628542\_nt3841\_Genome\_Tile|1  
TTTGGGAATAGGATCTGGAAAAGGGTCTGGGGGATCATTTGGATATAGACCATTAGGATC  
>HPV48\_Gamma\_9628542\_nt3861\_Genome\_Tile|1  
AAGGGTCTGGGGGATCATTTGGATATAGACCATTAGGATCCGCAGGAAGTGGAAGACCAG  
>HPV48\_Gamma\_9628542\_nt3881\_Genome\_Tile|1  
GGATATAGACCATTAGGATCCGCAGGAAGTGGAAGACCAGCCACAGACTTACCAGTGACT  
>HPV48\_Gamma\_9628542\_nt3901\_Genome\_Tile|1  
CGCAGGAAGTGGAAGACCAGCCACAGACTTACCAGTGACTAGACCTAATGTTGTGATAGA  
>HPV48\_Gamma\_9628542\_nt3921\_Genome\_Tile|1  
CCACAGACTTACCAGTGACTAGACCTAATGTTGTGATAGAACCTATAGGTCCCTCAAAGTA  
>HPV48\_Gamma\_9628542\_nt3941\_Genome\_Tile|1  
AGACCTAATGTTGTGATAGAACCTATAGGTCCCTCAAAGTATAGTACCCATTGATCCTGGA  
>HPV48\_Gamma\_9628542\_nt3961\_Genome\_Tile|1  
ACCTATAGGTCCCTCAAAGTATAGTACCCATTGATCCTGGAGCGTCATCTATAGTCCCTCT  
>HPV48\_Gamma\_9628542\_nt3981\_Genome\_Tile|1  
TAGTACCCATTGATCCTGGAGCGTCATCTATAGTCCCTCTTGTGAGGGAGGGCCTGATA  
>HPV48\_Gamma\_9628542\_nt4001\_Genome\_Tile|1  
GCGTCATCTATAGTCCCTCTTGTGAGGGAGGGCCTGATATATCTTTTATTGCACCAGAT  
>HPV48\_Gamma\_9628542\_nt4021\_Genome\_Tile|1  
TGTTGAGGGAGGGCCTGATATATCTTTTATTGCACCAGATGCAGGTCCAGGTATAGGAGG  
>HPV48\_Gamma\_9628542\_nt4041\_Genome\_Tile|1  
TATCTTTTATTGCACCAGATGCAGGTCCAGGTATAGGAGGTGAGGATATTGAACTATTCA  
>HPV48\_Gamma\_9628542\_nt4081\_Genome\_Tile|1  
TGAGGATATTGAACTATTCACCTTTAGAGATCCAGCAACTGATGTAGGTGGTGTAGTGG

>HPV48\_Gamma\_9628542\_nt4101\_Genome\_Tile|1  
CCTTTAGAGATCCAGCAACTGATGTAGGTGGTGTAGTGGAGGTCCTACTACTATTTCTA  
>HPV48\_Gamma\_9628542\_nt4161\_Genome\_Tile|1  
CAGAAGAAAGTGAGACAGCTATAATAGATGCTTTACCAAGTGCCACAACCTCCCAAACAGT  
>HPV48\_Gamma\_9628542\_nt4181\_Genome\_Tile|1  
ATAATAGATGCTTTACCAAGTGCCACAACCTCCCAAACAGTTGTTTTATGATTCTTATACA  
>HPV48\_Gamma\_9628542\_nt4201\_Genome\_Tile|1  
TGCCACAACCTCCCAAACAGTTGTTTTATGATTCTTATACACAAACTATCTTGCAAACACA  
>HPV48\_Gamma\_9628542\_nt4221\_Genome\_Tile|1  
TGTTTTATGATTCTTATACACAAACTATCTTGCAAACACAGGTAAACCCATTTTTTAAATA  
>HPV48\_Gamma\_9628542\_nt4241\_Genome\_Tile|1  
CAAACCTATCTTGCAAACACAGGTAAACCCATTTTTTAAATAATGCTATTAGTGATACTAAT  
>HPV48\_Gamma\_9628542\_nt4261\_Genome\_Tile|1  
GGTAAACCCATTTTTTAAATAATGCTATTAGTGATACTAATGTGTTTGTAGATCCATTATT  
>HPV48\_Gamma\_9628542\_nt4281\_Genome\_Tile|1  
ATGCTATTAGTGATACTAATGTGTTTGTAGATCCATTATTTGCAGGAGAGACAATTGGGG  
>HPV48\_Gamma\_9628542\_nt4301\_Genome\_Tile|1  
GTGTTTGTAGATCCATTATTTGCAGGAGAGACAATTGGGGACAACATATTTGAAGAGATA  
>HPV48\_Gamma\_9628542\_nt4321\_Genome\_Tile|1  
TGCAGGAGAGACAATTGGGGACAACATATTTGAAGAGATACCCCTGCAGAATTTAAATTT  
>HPV48\_Gamma\_9628542\_nt4341\_Genome\_Tile|1  
ACAACATATTTGAAGAGATACCCCTGCAGAATTTAAATTTTCAGTTTTCCGCGGGAAAGTA  
>HPV48\_Gamma\_9628542\_nt4381\_Genome\_Tile|1  
CAGTTTTCCGCGGGAAAGTACACCTGTTAAACCTGGGAGGGGTTTACGAACACCAGCTCA  
>HPV48\_Gamma\_9628542\_nt4401\_Genome\_Tile|1  
CACCTGTTAAACCTGGGAGGGGTTTACGAACACCAGCTCAAAGATCTTACAGTAGATTTA  
>HPV48\_Gamma\_9628542\_nt4421\_Genome\_Tile|1  
GGTTTACGAACACCAGCTCAAAGATCTTACAGTAGATTTATGGAACAGTACCCAATCCAA  
>HPV48\_Gamma\_9628542\_nt4441\_Genome\_Tile|1  
AAGATCTTACAGTAGATTTATGGAACAGTACCCAATCCAAGCTCCGGAATTTCTTAGTCA  
>HPV48\_Gamma\_9628542\_nt4461\_Genome\_Tile|1  
TGGAACAGTACCCAATCCAAGCTCCGGAATTTCTTAGTCAGCCTTCTCGATTGGTGCAGT  
>HPV48\_Gamma\_9628542\_nt4521\_Genome\_Tile|1  
TTGAGTTTGAAAATCCCGCCTTTGATCCAGATATTAGTATACAGTTCCAGCGTGATGTAA  
>HPV48\_Gamma\_9628542\_nt4541\_Genome\_Tile|1  
TTTGATCCAGATATTAGTATACAGTTCCAGCGTGATGTAAATAGCCTAGAGGCTGCGCCA  
>HPV48\_Gamma\_9628542\_nt4561\_Genome\_Tile|1  
ACAGTTCCAGCGTGATGTAAATAGCCTAGAGGCTGCGCCAAATCCAGCTTTTGCTGACAT  
>HPV48\_Gamma\_9628542\_nt4581\_Genome\_Tile|1  
ATAGCCTAGAGGCTGCGCCAAATCCAGCTTTTGCTGACATTGCTTATTTAAGTAGGCCGC  
>HPV48\_Gamma\_9628542\_nt4601\_Genome\_Tile|1  
AATCCAGCTTTTGCTGACATTGCTTATTTAAGTAGGCCGCACATGTCTGCTACATCAGAA  
>HPV48\_Gamma\_9628542\_nt4621\_Genome\_Tile|1  
TGCTTATTTAAGTAGGCCGCACATGTCTGCTACATCAGAAGGATTAGTCAGAGTCAGCAG  
>HPV48\_Gamma\_9628542\_nt4641\_Genome\_Tile|1  
ACATGTCTGCTACATCAGAAGGATTAGTCAGAGTCAGCAGAATTGGATCTCGAGCAGTAT  
>HPV48\_Gamma\_9628542\_nt4661\_Genome\_Tile|1  
GGATTAGTCAGAGTCAGCAGAATTGGATCTCGAGCAGTATTACAAACCAGGAGTGGATTA  
>HPV48\_Gamma\_9628542\_nt4681\_Genome\_Tile|1  
AATTGGATCTCGAGCAGTATTACAAACCAGGAGTGGATTAACCTATAGGCCCTAAAGTACA  
>HPV48\_Gamma\_9628542\_nt4701\_Genome\_Tile|1  
TACAAACCAGGAGTGGATTAACCTATAGGCCCTAAAGTACATTATTATATGGATTTGTCTG  
>HPV48\_Gamma\_9628542\_nt4721\_Genome\_Tile|1  
ACTATAGGCCCTAAAGTACATTATTATATGGATTTGTCTGCAATATCAACAGAAGCTATA  
>HPV48\_Gamma\_9628542\_nt4741\_Genome\_Tile|1

TTATTATATGGATTTGTCTGCAATATCAACAGAAGCTATAGAATTGCAAACCTTTGCAGA  
>HPV48\_Gamma\_9628542\_nt4761\_Genome\_Tile|1  
CAATATCAACAGAAGCTATAGAATTGCAAACCTTTGCAGATTCTGGACATGTTACACAAA  
>HPV48\_Gamma\_9628542\_nt4781\_Genome\_Tile|1  
GAATTGCAAACCTTTGCAGATTCTGGACATGTTACACAATAGTTGATGATTTCTTATCA  
>HPV48\_Gamma\_9628542\_nt4801\_Genome\_Tile|1  
TTCTGGACATGTTACACAATAGTTGATGATTTCTTATCAGTTACTGCTTTAGATGATCC  
>HPV48\_Gamma\_9628542\_nt4821\_Genome\_Tile|1  
TAGTTGATGATTTCTTATCAGTTACTGCTTTAGATGATCCAGCAAATATAGCTGATATAA  
>HPV48\_Gamma\_9628542\_nt4921\_Genome\_Tile|1  
CTTTAATAATTCACATATTACAGTACAAGGGGTTGATGAGGAAGGAGAAACAGTTGCTCT  
>HPV48\_Gamma\_9628542\_nt4941\_Genome\_Tile|1  
CAGTACAAGGGGTTGATGAGGAAGGAGAAACAGTTGCTCTTCCAATTCCTTCAATTACTA  
>HPV48\_Gamma\_9628542\_nt4961\_Genome\_Tile|1  
GAAGGAGAAACAGTTGCTCTTCCAATTCCTTCAATTACTAATTCCTCCAAAACTTTTGTT  
>HPV48\_Gamma\_9628542\_nt5001\_Genome\_Tile|1  
ATTCTTCCAAAACTTTTGTTACAGACATTGCAGAAAATGGTCTGTTTGCAAATGATACAG  
>HPV48\_Gamma\_9628542\_nt5021\_Genome\_Tile|1  
ACAGACATTGCAGAAAATGGTCTGTTTGCAAATGATACAGATAGTCTTTTAACCCAGCA  
>HPV48\_Gamma\_9628542\_nt5041\_Genome\_Tile|1  
TCTGTTTGCAAATGATACAGATAGTCTTTTAACCCAGCAAGCACTATTGTACCTGCTAT  
>HPV48\_Gamma\_9628542\_nt5061\_Genome\_Tile|1  
ATAGTCTTTTAACCCAGCAAGCACTATTGTACCTGCTATTAATTGGTTCCCTTTATTTG  
>HPV48\_Gamma\_9628542\_nt5081\_Genome\_Tile|1  
AGCACTATTGTACCTGCTATTAATTGGTTCCCTTTATTTGATAGTTACTCAGACTTTGCT  
>HPV48\_Gamma\_9628542\_nt5101\_Genome\_Tile|1  
TAATTGGTTCCCTTTATTTGATAGTTACTCAGACTTTGCTTTAGATCCCTTTTTTTATTC  
>HPV48\_Gamma\_9628542\_nt5121\_Genome\_Tile|1  
ATAGTTACTCAGACTTTGCTTTAGATCCCTTTTTTTATTCACGTAAGAAACGACGCTTAG  
>HPV48\_Gamma\_9628542\_nt5141\_Genome\_Tile|1  
TTAGATCCCTTTTTTTATTCACGTAAGAAACGACGCTTAGATATCCTTTAATGTTTTTCA  
>HPV48\_Gamma\_9628542\_nt5161\_Genome\_Tile|1  
ACGTAAGAAACGACGCTTAGATATCCTTTAATGTTTTTTCAGATGGCTCTGTGGTCTGCAG  
>HPV48\_Gamma\_9628542\_nt5261\_Genome\_Tile|1  
TCGTGTGTTGCGCACTGATGAATACGTGCAAGAAACGGATGTATATTTTTTATACAAGCAC  
>HPV48\_Gamma\_9628542\_nt5281\_Genome\_Tile|1  
AATACGTGCAAGAAACGGATGTATATTTTTTATACAAGCACTGAAAGACTTTTAATAGTTG  
>HPV48\_Gamma\_9628542\_nt5301\_Genome\_Tile|1  
GTATATTTTTTATACAAGCACTGAAAGACTTTTAATAGTTGGTAATCCTTATTTTGATGTT  
>HPV48\_Gamma\_9628542\_nt5321\_Genome\_Tile|1  
TGAAAGACTTTTAATAGTTGGTAATCCTTATTTTGATGTTGAAAACAGAGACACTATAAC  
>HPV48\_Gamma\_9628542\_nt5341\_Genome\_Tile|1  
GTAATCCTTATTTTGATGTTGAAAACAGAGACACTATAACAGTACCTAAAGTTTCTGCTA  
>HPV48\_Gamma\_9628542\_nt5461\_Genome\_Tile|1  
AAAATTTATATAATTCAGATAAGGAACGTTTAGTTTGGAACCTGTTGGTTTGGAAAGTAG  
>HPV48\_Gamma\_9628542\_nt5481\_Genome\_Tile|1  
AAGGAACGTTTAGTTTGGAACCTGTTGGTTTGGAAAGTAGGCAGAGGGGGTCTCTTGGC  
>HPV48\_Gamma\_9628542\_nt5501\_Genome\_Tile|1  
ACTTGTGTTGTTGGAAGTAGGCAGAGGGGGTCTCTTGGCGTAGGATCTACAGGTCATCC  
>HPV48\_Gamma\_9628542\_nt5521\_Genome\_Tile|1  
GCAGAGGGGGTCTCTTGGCGTAGGATCTACAGGTCATCCTTTACTAAATAAGATAGGGG  
>HPV48\_Gamma\_9628542\_nt5641\_Genome\_Tile|1  
CCATGGATCCTAAGCAGAGTCAGATACTAATAGTTGGTTGTGCTCCAGCCACTGGAGAAT  
>HPV48\_Gamma\_9628542\_nt5661\_Genome\_Tile|1  
CAGATACTAATAGTTGGTTGTGCTCCAGCCACTGGAGAATACTGGGATTTAGCTAAACCA

>HPV48\_Gamma\_9628542\_nt5681\_Genome\_Tile|1  
TGCTCCAGCCACTGGAGAATACTGGGATTTAGCTAAACCATGCAATGATTGGAACGG  
>HPV48\_Gamma\_9628542\_nt5701\_Genome\_Tile|1  
ACTGGGATTTAGCTAAACCATGCAATGATTGGAACGGGGCTGCACCACCAATTCAAC  
>HPV48\_Gamma\_9628542\_nt5721\_Genome\_Tile|1  
TGCAATGATTTGGAACGGGGCTGCACCACCAATTCAACTAGTTAATACTGTTATTCAG  
>HPV48\_Gamma\_9628542\_nt5801\_Genome\_Tile|1  
AGGCTTTGGGGCTGCTAATTTTCTTAAGTTGATGCAGGATCGTGCTGGCGTCCCTCTAGA  
>HPV48\_Gamma\_9628542\_nt5821\_Genome\_Tile|1  
TTCTTAAGTTGATGCAGGATCGTGCTGGCGTCCCTCTAGAGTTAATAGATTCTATTAGTA  
>HPV48\_Gamma\_9628542\_nt5881\_Genome\_Tile|1  
TATGGCCAGATTTTTTAAAGATGACCAAAGATATTTATGGAGACTCTGTCTTCTTTTTTG  
>HPV48\_Gamma\_9628542\_nt5901\_Genome\_Tile|1  
ATGACCAAAGATATTTATGGAGACTCTGTCTTCTTTTTTGGTAAACGGGAACAATGTTAT  
>HPV48\_Gamma\_9628542\_nt5921\_Genome\_Tile|1  
AGACTCTGTCTTCTTTTTTGGTAAACGGGAACAATGTTATGCTCGTCATCTTTTTGCAAG  
>HPV48\_Gamma\_9628542\_nt5961\_Genome\_Tile|1  
GCTCGTCATCTTTTTGCAAGAGCTGGCCAAATGGGGGAGCCTATACCAACAGAAAATGGA  
>HPV48\_Gamma\_9628542\_nt6001\_Genome\_Tile|1  
CTATACCAACAGAAAATGGAGTATATTATATAACTCCTGATTCTGCCGATCAAAACAACA  
>HPV48\_Gamma\_9628542\_nt6021\_Genome\_Tile|1  
GTATATTATATAACTCCTGATTCTGCCGATCAAAACAACAGATCTTCTCATTTAGGATCT  
>HPV48\_Gamma\_9628542\_nt6041\_Genome\_Tile|1  
TTCTGCCGATCAAAACAACAGATCTTCTCATTTAGGATCTTCTGTGTATTTTACAACACC  
>HPV48\_Gamma\_9628542\_nt6061\_Genome\_Tile|1  
GATCTTCTCATTTAGGATCTTCTGTGTATTTTACAACACCAAGTGGATCCTTGAATACTA  
>HPV48\_Gamma\_9628542\_nt6181\_Genome\_Tile|1  
GCATTTGTTGGGGAAATGAGCTGTTTATTACAGTTTTTGGATAATACTCATAATGTGAATT  
>HPV48\_Gamma\_9628542\_nt6201\_Genome\_Tile|1  
CTGTTTATTACAGTTTTTGGATAATACTCATAATGTGAATTTTACTATTAGTGTTAAGAAT  
>HPV48\_Gamma\_9628542\_nt6221\_Genome\_Tile|1  
TAATACTCATAATGTGAATTTTACTATTAGTGTTAAGAATGATAAACTGCATTAAGTGA  
>HPV48\_Gamma\_9628542\_nt6241\_Genome\_Tile|1  
TTACTATTAGTGTTAAGAATGATAAACTGCATTAAGTGAAGTAACTACATAGATAATGGTT  
>HPV48\_Gamma\_9628542\_nt6261\_Genome\_Tile|1  
GATAAACTGCATTAAGTGAAGTAACTACATAGATAATGGTTACAAATATAATAATGCAGAT  
>HPV48\_Gamma\_9628542\_nt6281\_Genome\_Tile|1  
AAACTACATAGATAATGGTTACAAATATAATAATGCAGATTTTAAACAATATCTTCGACA  
>HPV48\_Gamma\_9628542\_nt6301\_Genome\_Tile|1  
ACAAATATAATAATGCAGATTTTAAACAATATCTTCGACATACAGAAGAATATGAAATAG  
>HPV48\_Gamma\_9628542\_nt6321\_Genome\_Tile|1  
TTTAAACAATATCTTCGACATACAGAAGAATATGAAATAGAGTTGGTTTTTCAGTTATGC  
>HPV48\_Gamma\_9628542\_nt6361\_Genome\_Tile|1  
AGTTGGTTTTTCAGTTATGCAAAGTGAAGTGAAGTGAAGTGAAGTGAAGTGAAGTGAAGT  
>HPV48\_Gamma\_9628542\_nt6461\_Genome\_Tile|1  
TGTTCCACCAGCTCCAACGGGCATTGAAGATACTTACAGGTATATCAAATCCATGGCTAC  
>HPV48\_Gamma\_9628542\_nt6481\_Genome\_Tile|1  
GCATTGAAGATACTTACAGGTATATCAAATCCATGGCTACTAAATGCCCTACTGCTGAAC  
>HPV48\_Gamma\_9628542\_nt6501\_Genome\_Tile|1  
TATATCAAATCCATGGCTACTAAATGCCCTACTGCTGAAGCAGAGAAGACACAGATCCA  
>HPV48\_Gamma\_9628542\_nt6521\_Genome\_Tile|1  
TAAATGCCCTACTGCTGAAGCAGAGAAGACACAGATCCATACAAAGCTTACAGTTTCTG  
>HPV48\_Gamma\_9628542\_nt6541\_Genome\_Tile|1  
CAGAAGAAGACACAGATCCATACAAAGCTTACAGTTTCTGGACTTTAGATATGACAGAGC  
>HPV48\_Gamma\_9628542\_nt6561\_Genome\_Tile|1

TACAAAGCTTACAGTTTCTGGACTTTAGATATGACAGAGCGCTTCTCGTCTGATTTAAGT  
>HPV48\_Gamma\_9628542\_nt6581\_Genome\_Tile|1  
GACTTTAGATATGACAGAGCGCTTCTCGTCTGATTTAAGTCAGTTTTCCCTGGGTCGAAA  
>HPV48\_Gamma\_9628542\_nt6601\_Genome\_Tile|1  
GCTTCTCGTCTGATTTAAGTCAGTTTTCCCTGGGTCGAAAATTTTTATATCAAACCTGGTT  
>HPV48\_Gamma\_9628542\_nt6621\_Genome\_Tile|1  
CAGTTTTCCCTGGGTCGAAAATTTTTATATCAAACCTGGTTTGTTAAATGGTAAACGAGCT  
>HPV48\_Gamma\_9628542\_nt6641\_Genome\_Tile|1  
ATTTTTATATCAAACCTGGTTTGTTAAATGGTAAACGAGCTAGAACAGACTATACAGCTGC  
>HPV48\_Gamma\_9628542\_nt6661\_Genome\_Tile|1  
TGTTAAATGGTAAACGAGCTAGAACAGACTATACAGCTGCAGGATCTAGTACCAGATCTA  
>HPV48\_Gamma\_9628542\_nt6681\_Genome\_Tile|1  
AGAACAGACTATACAGCTGCAGGATCTAGTACCAGATCTACAAAGCGTAGGAGAGTAAGA  
>HPV48\_Gamma\_9628542\_nt6701\_Genome\_Tile|1  
AGGATCTAGTACCAGATCTACAAAGCGTAGGAGAGTAAGATAGTAAAGATGTAGAATGTT  
>HPV48\_Gamma\_9628542\_nt6721\_Genome\_Tile|1  
CAAAGCGTAGGAGAGTAAGATAGTAAAGATGTAGAATGTTTACATTATTAATACTGTGAA  
>HPV48\_Gamma\_9628542\_nt6801\_Genome\_Tile|1  
AAACACTGTGAATATTTTACCGTGGTGTCATTTATACGCCTCCATTGGGTGGGTTCTGAC  
>HPV48\_Gamma\_9628542\_nt6861\_Genome\_Tile|1  
CTATAAACTCCTGGGTCAGTCATTTGGTCAGCAGACGCTGAGGAGCAGCAGACGATTCAG  
>HPV48\_Gamma\_9628542\_nt7001\_Genome\_Tile|1  
TAAATGTACTGCCAACTTTTACAAGTTCAGACAGAGATCAACAAGATATCTTAAAACAG  
>HPV48\_Gamma\_9628542\_nt7021\_Genome\_Tile|1  
TACAAGTTCAGACAGAGATCAACAAGATATCTTAAAACAGTACCTAAAGCGGTACTGTAC  
>HPV24\_Unclassified\_9628486\_nt0101\_Genome\_Tile|1  
AGCAACTACTTTTCATTACCTAACAAGTATTTTCATGCACCGTTTCCGTATCACTGTGAAT  
>HPV24\_Unclassified\_9628486\_nt0121\_Genome\_Tile|1  
AACAAGTATTTTCATGCACCGTTTCCGTATCACTGTGAATGTATTTATTGATTAGACATA  
>HPV24\_Unclassified\_9628486\_nt0141\_Genome\_Tile|1  
GTTTCCGTATCACTGTGAATGTATTTATTGATTAGACATATAAAAAGGAAGACATCTTGA  
>HPV24\_Unclassified\_9628486\_nt0161\_Genome\_Tile|1  
GTATTTATTGATTAGACATATAAAAAGGAAGACATCTTGATGGCTCAACCAGGTAAACCT  
>HPV24\_Unclassified\_9628486\_nt0181\_Genome\_Tile|1  
TAAAAGGAAGACATCTTGATGGCTCAACCAGGTAAACCTCAGTCAGTGTTAGAACTTAG  
>HPV24\_Unclassified\_9628486\_nt0221\_Genome\_Tile|1  
CAGTCAGTGTTAGAACTTAGTAGATTATTAATATACCATTAGACGATTGTGTTGTACCA  
>HPV24\_Unclassified\_9628486\_nt0241\_Genome\_Tile|1  
TAGATTATTAAATATACCATTAGACGATTGTGTTGTACCATGTAACCTTTTGCAAAGATT  
>HPV24\_Unclassified\_9628486\_nt0261\_Genome\_Tile|1  
TAGACGATTGTGTTGTACCATGTAACCTTTTGCAAAGATTCTAAGTTATACAGAGTTAA  
>HPV24\_Unclassified\_9628486\_nt0281\_Genome\_Tile|1  
TGTAACCTTTTGCAAAGATTTCTAAGTTATACAGAGTTAACTGACTTTGACACCAAATGC  
>HPV24\_Unclassified\_9628486\_nt0421\_Genome\_Tile|1  
AAATTATTTGTAGAGAGTGTGATAGGTGGGAAATAGAACAAAAAGAAAATACACCTCT  
>HPV24\_Unclassified\_9628486\_nt0441\_Genome\_Tile|1  
TGATAGGTGGGAAATAGAACAAAAAGAAAATACACCTCTTTCGGACATTATTGTAAGGT  
>HPV24\_Unclassified\_9628486\_nt0461\_Genome\_Tile|1  
CAAAAAGAAAATACACCTCTTTCGGACATTATTGTAAGGTGTCACCATTGCTTAAAATTA  
>HPV24\_Unclassified\_9628486\_nt0481\_Genome\_Tile|1  
TTCGGACATTATTGTAAGGTGTCACCATTGCTTAAATTAATCAAATTGAAAAGCT  
>HPV24\_Unclassified\_9628486\_nt0641\_Genome\_Tile|1  
CTCTACAAGACATTGTCTTAGAGTTGACTGAGCCACAGACTGTTGATTTGCACTGTGAAG  
>HPV24\_Unclassified\_9628486\_nt0661\_Genome\_Tile|1  
GAGTTGACTGAGCCACAGACTGTTGATTTGCACTGTGAAGAGGAGTTGCCAGAGCAGGAT



>HPV24\_Unclassified\_9628486\_nt0821\_Genome\_Tile|1  
GAATACGTGGCCTGCAAGACTTACTGCTAGAAGAGGTGGTCATTTTGTGTCCCGACTGCC  
>HPV24\_Unclassified\_9628486\_nt0981\_Genome\_Tile|1  
ATTTGGACACATTGCTTGAGCAAAATTCAGATTCTGATGTATCAGATCTTATAAGTAATG  
>HPV24\_Unclassified\_9628486\_nt1061\_Genome\_Tile|1  
AACTCCCCGAGAAGTGTTC AACAGCAGGAGTTAGAGGAGAGCAATGCTTTGTTGCAAAGT  
>HPV24\_Unclassified\_9628486\_nt1241\_Genome\_Tile|1  
GTAGAATTGACCCCTTACAAATGAACTGAAGATGTTACTACATTGGTGCAGCAGGAGGAA  
>HPV24\_Unclassified\_9628486\_nt1261\_Genome\_Tile|1  
TGAAACTGAAGATGTTACTACATTGGTGCAGCAGGAGGAAGAGGTACCAGCTTTAGAGAC  
>HPV24\_Unclassified\_9628486\_nt1281\_Genome\_Tile|1  
CATTGGTGCAGCAGGAGGAAGAGGTACCAGCTTTAGAGACATCTTCCACCAGTAACTTAA  
>HPV24\_Unclassified\_9628486\_nt1341\_Genome\_Tile|1  
GGAAGGAAGATAATGCACATTATAAAGAACTTATGCGATGCAGTAACTTAAAAGCTACCT  
>HPV24\_Unclassified\_9628486\_nt1361\_Genome\_Tile|1  
TATAAAGAACTTATGCGATGCAGTAACTTAAAAGCTACCTTACTATCAAAAATTTAAAAAT  
>HPV24\_Unclassified\_9628486\_nt1381\_Genome\_Tile|1  
CAGTAACTTAAAAGCTACCTTACTATCAAAAATTTAAAAATGCTTTTGGTGTAAGCTTTGT  
>HPV24\_Unclassified\_9628486\_nt1401\_Genome\_Tile|1  
TACTATCAAAAATTTAAAAATGCTTTTGGTGTAAGCTTTGTTGAACTGACTCGCCAGTTCA  
>HPV24\_Unclassified\_9628486\_nt1421\_Genome\_Tile|1  
GCTTTTGGTGTAAGCTTTGTTGAACTGACTCGCCAGTTCAGAAGTAATAAGACTTGTGT  
>HPV24\_Unclassified\_9628486\_nt1481\_Genome\_Tile|1  
AATGATTGGGTGGTAGCAATATATGGTGTAATTTATGATTTATTTGAAAAGTTCTAAGCAA  
>HPV24\_Unclassified\_9628486\_nt1581\_Genome\_Tile|1  
TGTCTGCAATGTTTTTATATCTGTTGTGTTTCAAGGCTGGCAAAAATAGACAAACTGTTA  
>HPV24\_Unclassified\_9628486\_nt1601\_Genome\_Tile|1  
CTGTTGTGTTTCAAGGCTGGCAAAAATAGACAAACTGTTATAAGGTTATTAGTGTCTATG  
>HPV24\_Unclassified\_9628486\_nt1641\_Genome\_Tile|1  
TAAGGTTATTAGTGTCTATGTTATATGTGGCAGAGGAGCAAATTTTATCAGAACCTCCAA  
>HPV24\_Unclassified\_9628486\_nt1741\_Genome\_Tile|1  
TAGCTCAAAATGCTGCTACCTTTACACATGGGTCTTATCCTAAATGGATTATAGAACAAAC  
>HPV24\_Unclassified\_9628486\_nt2141\_Genome\_Tile|1  
TTAAGTGCTTTAAAAGATTTTTTACATGGTAAACCTAAAAGAAATTGTTTATTAATATAT  
>HPV24\_Unclassified\_9628486\_nt2781\_Genome\_Tile|1  
GCAGTGTTACTTTATTATGCTAGACAAAATGGGGTGCTGCGGCTGGGTACTTACCAGTT  
>HPV24\_Unclassified\_9628486\_nt2821\_Genome\_Tile|1  
GGCTGGGTACTTACCAGTTCCACCACTAGCTACCTCAGAAGCCAAAGCTAAACAGGCTA  
>HPV24\_Unclassified\_9628486\_nt2861\_Genome\_Tile|1  
AGCCAAAGCTAAACAGGCTATTAGTATGGTGTTGCAGCTGCAATCTTTACAACAATCTCC  
>HPV24\_Unclassified\_9628486\_nt2881\_Genome\_Tile|1  
TTAGTATGGTGTTGCAGCTGCAATCTTTACAACAATCTCCTTATGGCACAGAAAAGTGGA  
>HPV24\_Unclassified\_9628486\_nt2901\_Genome\_Tile|1  
CAATCTTTACAACAATCTCCTTATGGCACAGAAAAGTGGACACTGGTGGACACAAGCATA  
>HPV24\_Unclassified\_9628486\_nt3141\_Genome\_Tile|1  
TATTTAATAGGGGAGTTTAAACATTATTATGTGCTGTTTGCTGATGATGCCAATAGATAC  
>HPV24\_Unclassified\_9628486\_nt3281\_Genome\_Tile|1  
CCCAGGAGGGTCCCGAGAACTACCCGGATCCACCGCTAACTCCAAGGCCTCAAGCCCAAC  
>HPV24\_Unclassified\_9628486\_nt3301\_Genome\_Tile|1  
TACCCGGATCCACCGCTAACTCCAAGGCCTCAAGCCCAACCCAACAGCCACAACAAGCCT  
>HPV24\_Unclassified\_9628486\_nt3361\_Genome\_Tile|1  
GTAGTGACGAAACAACCAAGCGGAAGAGGTACGGGCGAAGGGAGTCAAGCCCCACTGACT  
>HPV24\_Unclassified\_9628486\_nt3381\_Genome\_Tile|1  
CGGAAGAGGTACGGGCGAAGGGAGTCAAGCCCCACTGACTCCAGATGCAGACGACGATCC  
>HPV24\_Unclassified\_9628486\_nt3461\_Genome\_Tile|1

AGGGCGACGAGCACGGTCCCGCACCCGGTCGCGCTGCAGCTCCACTCAAACTCGATCTAG  
>HPV24\_Unclassified\_9628486\_nt3501\_Genome\_Tile|1  
TCCACTCAAACTCGATCTAGATCCACCTCAAGGAGGTCCAGATCAACCTCCAGGGGCAAC  
>HPV24\_Unclassified\_9628486\_nt3541\_Genome\_Tile|1  
GATCAACCTCCAGGGGCAACAGGAGGTGTAGGGGAGACACCCCAGAGGGCAACGAGGAG  
>HPV24\_Unclassified\_9628486\_nt4001\_Genome\_Tile|1  
GTTTCTCGACCTAGTAAGATTTCTAAGGGTGTAGATTGGTCACTGGGAAGTTTTGATAA  
>HPV24\_Unclassified\_9628486\_nt4021\_Genome\_Tile|1  
TTCCTAAGGGTGTAGATTGGTCACTGGGAAGTTTTGATAAACTGTAAGTACTAACATAGC  
>HPV24\_Unclassified\_9628486\_nt4041\_Genome\_Tile|1  
TCACTGGGAAGTTTTGATAAACTGTAAGTACTAACATAGCTTTTGCTACTAACACACATA  
>HPV24\_Unclassified\_9628486\_nt4081\_Genome\_Tile|1  
TTTTTGCTACTAACACACATATAACCTATTTTACTTTTTGTATGCTTTGCAATGGTGCGT  
>HPV24\_Unclassified\_9628486\_nt4341\_Genome\_Tile|1  
GCCATTGGGTGAAGGTACTGGAGTTCGTGTGGGCAGTACACCCACAGTCGTCGGCCTGC  
>HPV24\_Unclassified\_9628486\_nt4361\_Genome\_Tile|1  
GAGTTCGTGTGGGCAGTACACCCACAGTCGTCGGCCTGCCCTTGTGCCTGAAGTAATAG  
>HPV24\_Unclassified\_9628486\_nt4421\_Genome\_Tile|1  
GTCCTGCTGACTTATTACCTGTTGATACAATAGCCCCTGTTGACCCAGCATCGTCATCTA  
>HPV24\_Unclassified\_9628486\_nt4441\_Genome\_Tile|1  
GTTGATACAATAGCCCCTGTTGACCCAGCATCGTCATCTATAGTTCCTCTTACTGAATCA  
>HPV24\_Unclassified\_9628486\_nt4461\_Genome\_Tile|1  
TGACCCAGCATCGTCATCTATAGTTCCCTCTTACTGAATCATCAGGTGTAGACCTTTTACC  
>HPV24\_Unclassified\_9628486\_nt4541\_Genome\_Tile|1  
CAGAAGTACATCCTATACCTGATGTGCCACATTTGATACTCCAGTAGTGACAACAAGCA  
>HPV24\_Unclassified\_9628486\_nt4561\_Genome\_Tile|1  
GATGTGCCACATTTGATACTCCAGTAGTGACAACAAGCAAAGGCTCTAGTGCCATTTTA  
>HPV24\_Unclassified\_9628486\_nt4701\_Genome\_Tile|1  
TACAGAATCTACACCAAGTCAAGGTGAGAGTTCATTGTCAGACGAAATAATTGTCGCCTC  
>HPV24\_Unclassified\_9628486\_nt4721\_Genome\_Tile|1  
AAGGTGAGAGTTCATTGTCAGACGAAATAATTGTCGCCTCTGGTGCAGGTGGACAATCAG  
>HPV24\_Unclassified\_9628486\_nt4741\_Genome\_Tile|1  
GACGAAATAATTGTCGCCTCTGGTGCAGGTGGACAATCAGTAGGCGTTTCTGAAAATATA  
>HPV24\_Unclassified\_9628486\_nt4781\_Genome\_Tile|1  
TAGGCGTTTCTGAAAATATAGAACTGCAGGATTTATCAAATAGATATTCTTTTGAAATAG  
>HPV24\_Unclassified\_9628486\_nt4861\_Genome\_Tile|1  
CGTAGCAGTACCCCATTAACAAGAGCTACACAAGCATTTAGACAAAGATCACTTACAAAT  
>HPV24\_Unclassified\_9628486\_nt4881\_Genome\_Tile|1  
AAGAGCTACACAAGCATTTAGACAAAGATCACTTACAAATAGGAGACTGTTACAACAAGT  
>HPV24\_Unclassified\_9628486\_nt4901\_Genome\_Tile|1  
GACAAAGATCACTTACAAATAGGAGACTGTTACAACAAGTGCCTGTTGAAGACCCTTTGT  
>HPV24\_Unclassified\_9628486\_nt5041\_Genome\_Tile|1  
CAAGACCTTGACAGTTTTGTAGAGCCTCCTAACAGAGATTTTTTAGATATTGCAGAACTG  
>HPV24\_Unclassified\_9628486\_nt5101\_Genome\_Tile|1  
GGAAGGCCTAGATTTTCTGAAACACGCGAGGGTTATGTTAGGTTAAGCAGATTGGGTCGT  
>HPV24\_Unclassified\_9628486\_nt5121\_Genome\_Tile|1  
AACACGCGAGGGTTATGTTAGGTTAAGCAGATTGGGTCGTAGAGCAACTATTAGAACAAG  
>HPV24\_Unclassified\_9628486\_nt5141\_Genome\_Tile|1  
GGTTAAGCAGATTGGGTCGTAGAGCAACTATTAGAACAAGGGCAGGAACACAAATAGGAG  
>HPV24\_Unclassified\_9628486\_nt5161\_Genome\_Tile|1  
AGAGCAACTATTAGAACAAGGGCAGGAACACAAATAGGAGCACAAGTACATTTTTATAAA  
>HPV24\_Unclassified\_9628486\_nt5321\_Genome\_Tile|1  
TTATAGATACTAATATAGAGGAAAATCCTTTAGCTGAACAAATGGAGTTGGAAATTGATA  
>HPV24\_Unclassified\_9628486\_nt5341\_Genome\_Tile|1  
GAAAATCCTTTAGCTGAACAAATGGAGTTGGAAATTGATACTTATCCTGAAGCTCATTCA

>HPV24\_Unclassified\_9628486\_nt5361\_Genome\_Tile|1  
AATGGAGTTGGAAATTGATACTTATCCTGAAGCTCATTTCATTTGATGCTTTGTTAGATGA  
>HPV24\_Unclassified\_9628486\_nt5401\_Genome\_Tile|1  
TTTGTATGCTTTGTTAGATGAAGCAACAGACGATTTTAGTGGTTCACAGTTAGTTATAGGC  
>HPV24\_Unclassified\_9628486\_nt5461\_Genome\_Tile|1  
AATAGAAGATCCACTACATCATATACTGTTCCCTAGATTTGAATCCCCAAGAAATCTTCT  
>HPV24\_Unclassified\_9628486\_nt5521\_Genome\_Tile|1  
TATTATGTACAGGATTTGCAGGGATATTATGTAGCCTATCCTGAATCTCGCGATAAAATA  
>HPV24\_Unclassified\_9628486\_nt5541\_Genome\_Tile|1  
GGGATATTATGTAGCCTATCCTGAATCTCGCGATAAAATAGAACTTATTTATCCCTCACC  
>HPV24\_Unclassified\_9628486\_nt5561\_Genome\_Tile|1  
CTGAATCTCGCGATAAAATAGAACTTATTTATCCCTCACCCACATTACCTGCAGTTGTCA  
>HPV24\_Unclassified\_9628486\_nt5581\_Genome\_Tile|1  
GAACTTATTTATCCCTCACCCACATTACCTGCAGTTGTCATACATACAGAAGATAGTAGT  
>HPV24\_Unclassified\_9628486\_nt6101\_Genome\_Tile|1  
CAGAAAACCTGTATCATATAGGACACAAGCATCGTCCACAGATGATAGACAAAATACCT  
>HPV24\_Unclassified\_9628486\_nt6201\_Genome\_Tile|1  
TGCACCCTGCATAGGAGAACATTGGGAAGTAGCTGAGAGGTGTGCTGGTGATAATAATGA  
>HPV24\_Unclassified\_9628486\_nt6321\_Genome\_Tile|1  
AGATATTGGTTATGGGAATTTAAATTTTAGAACACTACAACAAAGTAGATCAGACGTAAG  
>HPV24\_Unclassified\_9628486\_nt6341\_Genome\_Tile|1  
TAAATTTTAGAACACTACAACAAAGTAGATCAGACGTAAGTTTGGATATTGTAAATGAAA  
>HPV24\_Unclassified\_9628486\_nt6721\_Genome\_Tile|1  
ATTTGTTGGGCTAATCAATTGTTTCATTACGGTAGTAGATAACACCAGGAACACCAATTTT  
>HPV24\_Unclassified\_9628486\_nt6741\_Genome\_Tile|1  
GTTTCATTACGGTAGTAGATAACACCAGGAACACCAATTTTAGTATAAGTGTATACACTGA  
>HPV24\_Unclassified\_9628486\_nt6801\_Genome\_Tile|1  
AAATGGCAAAGTAACAGATATTAACGAGTATGATGCTAATAAATTTAGGGAATATCAGAG  
>HPV24\_Unclassified\_9628486\_nt6881\_Genome\_Tile|1  
TTTCACTTATACTGCAGCTATGTAAAATCCCTTTAAAAGCAGATGTGTTAGCACAGATCA  
>HPV24\_Unclassified\_9628486\_nt7161\_Genome\_Tile|1  
ACGAAAGTTCCTGTTTCAAGCGGTCTTGTACAAAAAACATCTAAAAAACATCTAATGT  
>HPV24\_Unclassified\_9628486\_nt7181\_Genome\_Tile|1  
CGGGTCTTGTACAAAAAACATCTAAAAAACATCTAATGTATCCAAGGGGACCAAACGAA  
>HPV24\_Unclassified\_9628486\_nt7241\_Genome\_Tile|1  
AACGCACGTAAAATAAAGGCTGTTTACCGTTTTCGGTACAATATATGTGTATTCCAAGAA  
>HPV24\_Unclassified\_9628486\_nt7261\_Genome\_Tile|1  
TGTTTACCGTTTTCGGTACAATATATGTGTATTCCAAGAATGCTTGTATTTCATGTGCGT  
>HPV1\_Mu\_9626063\_nt0001\_Genome\_Tile|1  
GTTAACCTACCATCATTTCATTATTCTAGTTACAACAAGAACCTAGGAGTTATATGCCAGAA  
>HPV1\_Mu\_9626063\_nt0021\_Genome\_Tile|1  
ATTCTAGTTACAACAAGAACCTAGGAGTTATATGCCAGAAGTAAGCCTATAAAATACACA  
>HPV1\_Mu\_9626063\_nt0041\_Genome\_Tile|1  
CTAGGAGTTATATGCCAGAAGTAAGCCTATAAAATACACAGGTAAGACTCTGCACAGGAC  
>HPV1\_Mu\_9626063\_nt0081\_Genome\_Tile|1  
GGTAAGACTCTGCACAGGACCAGATGGCGACACCAATCCGGACCGTCAGACAGCTTTCCG  
>HPV1\_Mu\_9626063\_nt0101\_Genome\_Tile|1  
CAGATGGCGACACCAATCCGGACCGTCAGACAGCTTTCCGAAAGCCTCTGTATCCCATAT  
>HPV1\_Mu\_9626063\_nt0121\_Genome\_Tile|1  
GACCGTCAGACAGCTTTCCGAAAGCCTCTGTATCCCATATATTGATGTTTTATTGCCTTG  
>HPV1\_Mu\_9626063\_nt0201\_Genome\_Tile|1  
TGTCTAATGCTGAGAAGCTGCTTTTTTGATCATTTTGATTTGCATCTTGTCTGGAGAGACA  
>HPV1\_Mu\_9626063\_nt0241\_Genome\_Tile|1  
GCATCTTGTCTGGAGAGACAATTTGGTGTGTTGGATGCTGTCAAGGGTGTGCTAGAACTGT  
>HPV1\_Mu\_9626063\_nt0261\_Genome\_Tile|1

ATTTGGTGTGTTGGATGCTGTCAAGGGTGTGCTAGAACTGTTAGCCTATTGGAGTTTGTTT  
>HPV1\_Mu\_9626063\_nt0281\_Genome\_Tile|1  
CAAGGGTGTGCTAGAACTGTTAGCCTATTGGAGTTTGTTTTATATTATCAGGAGTCTTAT  
>HPV1\_Mu\_9626063\_nt0301\_Genome\_Tile|1  
TAGCCTATTGGAGTTTGTTTTATATTATCAGGAGTCTTATGAGGTACCGGAAATAGAAGA  
>HPV1\_Mu\_9626063\_nt0321\_Genome\_Tile|1  
TATATTATCAGGAGTCTTATGAGGTACCGGAAATAGAAGAAATTTTGGACAGACCTTTAT  
>HPV1\_Mu\_9626063\_nt0341\_Genome\_Tile|1  
GAGGTACCGGAAATAGAAGAAATTTTGGACAGACCTTTATTGCAAATTGAACTCCGTTGT  
>HPV1\_Mu\_9626063\_nt0381\_Genome\_Tile|1  
TGCAAATTGAACTCCGTTGTGTTACATGCATAAAAAAACTGAGTGTGCTGAAAAATTGG  
>HPV1\_Mu\_9626063\_nt0401\_Genome\_Tile|1  
GTTACATGCATAAAAAAACTGAGTGTGCTGAAAAATTGGAGGTGTGTCAAACGGAGAA  
>HPV1\_Mu\_9626063\_nt0461\_Genome\_Tile|1  
AGAGTGCATAGAGTTAGAAACAGACTTAAAGCAAAGTGTAGTTTGTGTCGCTTGTATGCT  
>HPV1\_Mu\_9626063\_nt0481\_Genome\_Tile|1  
CAGACTTAAAGCAAAGTGTAGTTTGTGTCGCTTGTATGCTATATAACAATGGTGGGCGAA  
>HPV1\_Mu\_9626063\_nt0501\_Genome\_Tile|1  
GTTTGTGTCGCTTGTATGCTATATAACAATGGTGGGCGAAATGCCAGCACTAAAGGACCT  
>HPV1\_Mu\_9626063\_nt0521\_Genome\_Tile|1  
ATATAACAATGGTGGGCGAAATGCCAGCACTAAAGGACCTGGTTCTTCAACTTGAACCAA  
>HPV1\_Mu\_9626063\_nt0541\_Genome\_Tile|1  
ATGCCAGCACTAAAGGACCTGGTTCTTCAACTTGAACCAAGCGTCCTAGATTTAGATCTT  
>HPV1\_Mu\_9626063\_nt0601\_Genome\_Tile|1  
TATTGTTACGAGGAGGTGCCTCCTGATGACATAGAGGAGGAGTTAGTGTGCGCCTCAGCAA  
>HPV1\_Mu\_9626063\_nt0621\_Genome\_Tile|1  
TCCTGATGACATAGAGGAGGAGTTAGTGTGCGCCTCAGCAACCTTATGCTGTGCTTGCTTC  
>HPV1\_Mu\_9626063\_nt0701\_Genome\_Tile|1  
TGGTTCGATTGACCGTCCTCGCGGATCACAGCGCCATTAGACAGCTGGAGGAACTCCTTC  
>HPV1\_Mu\_9626063\_nt0721\_Genome\_Tile|1  
GCGGATCACAGCGCCATTAGACAGCTGGAGGAACTCCTTCTGCGATCTTGAACATCGTG  
>HPV1\_Mu\_9626063\_nt0741\_Genome\_Tile|1  
ACAGCTGGAGGAACTCCTTCTGCGATCTTGAACATCGTGTGCCCCTGTGCACCCTACA  
>HPV1\_Mu\_9626063\_nt0801\_Genome\_Tile|1  
GCGACAGTAAAATGGCAGATAATAAAGGTACTGAAAACGATTGGTTTTTGGTGGAGGCGA  
>HPV1\_Mu\_9626063\_nt0841\_Genome\_Tile|1  
TTGGTTTTTGGTGGAGGCGACAGATTGTGAGGAAACGTTAGAGGAAACCTCACTTGGTGA  
>HPV1\_Mu\_9626063\_nt0881\_Genome\_Tile|1  
GAGGAAACCTCACTTGGTGACCTAGATAATGTTTCTTGTGTTAGCGACTTATCTGATTTA  
>HPV1\_Mu\_9626063\_nt1021\_Genome\_Tile|1  
TAATGCTTTAAACGAAAGTTACTTTACAGTCCTCAGGCGAGAAGCGCGGACGAAACAGA  
>HPV1\_Mu\_9626063\_nt1041\_Genome\_Tile|1  
TACTTTACAGTCCTCAGGCGAGAAGCGCGGACGAAACAGACATTGCTAGCATTAGTCCTA  
>HPV1\_Mu\_9626063\_nt1081\_Genome\_Tile|1  
CATTGCTAGCATTAGTCCTAGATTAGAACTATTTCTATTACAAAGCAAGACAAAAAAG  
>HPV1\_Mu\_9626063\_nt1101\_Genome\_Tile|1  
GATTAGAACTATTTCTATTACAAAGCAAGACAAAAAAGGTATCGAAGGCAACTGTTTT  
>HPV1\_Mu\_9626063\_nt1121\_Genome\_Tile|1  
ACAAAGCAAGACAAAAAAGGTATCGAAGGCAACTGTTTTCTCAGGATGATAGTGGTTTA  
>HPV1\_Mu\_9626063\_nt1141\_Genome\_Tile|1  
GTATCGAAGGCAACTGTTTTCTCAGGATGATAGTGGTTTAGAGCTATCGCTGCTTCAGGA  
>HPV1\_Mu\_9626063\_nt1161\_Genome\_Tile|1  
CTCAGGATGATAGTGGTTTAGAGCTATCGCTGCTTCAGGATGAAACTGAAAATATTGATG  
>HPV1\_Mu\_9626063\_nt1181\_Genome\_Tile|1  
GAGCTATCGCTGCTTCAGGATGAAACTGAAAATATTGATGAATCGACACAGGTAGATCAA

>HPV1\_Mu\_9626063\_nt1201\_Genome\_Tile|1  
TGAAACTGAAAATATTGATGAATCGACACAGGTAGATCAACAGCAGAAAGAACATACTGG  
>HPV1\_Mu\_9626063\_nt1221\_Genome\_Tile|1  
AATCGACACAGGTAGATCAACAGCAGAAAGAACATACTGGGGAAGTTGGGGCCGCTGGGG  
>HPV1\_Mu\_9626063\_nt1241\_Genome\_Tile|1  
CAGCAGAAAGAACATACTGGGGAAGTTGGGGCCGCTGGGGTGAACATTTTGAAAGCTAGT  
>HPV1\_Mu\_9626063\_nt1261\_Genome\_Tile|1  
GGAAGTTGGGGCCGCTGGGGTGAACATTTTGAAAGCTAGTAATATCCGCGCCGCATTATT  
>HPV1\_Mu\_9626063\_nt1281\_Genome\_Tile|1  
TGAACATTTTGAAAGCTAGTAATATCCGCGCCGCATTATTAAGCAGATTTAAAGATACGG  
>HPV1\_Mu\_9626063\_nt1301\_Genome\_Tile|1  
AATATCCGCGCCGCATTATTAAGCAGATTTAAAGATACGGCTGGCGTCAGTTTTACAGAC  
>HPV1\_Mu\_9626063\_nt1321\_Genome\_Tile|1  
AAGCAGATTTAAAGATACGGCTGGCGTCAGTTTTACAGACCTGACGCGGTCGTACAAGAG  
>HPV1\_Mu\_9626063\_nt1401\_Genome\_Tile|1  
ATTGGGTTTTGGCAGTTTGGGGTGTCCGTGAAAATTTAATTGACAGTGTAAGAATTAT  
>HPV1\_Mu\_9626063\_nt1421\_Genome\_Tile|1  
GGTGTCCGTGAAAATTTAATTGACAGTGTAAGAATTATTGCAAACCCATTGTGTGTAT  
>HPV1\_Mu\_9626063\_nt1441\_Genome\_Tile|1  
TGACAGTGTAAGAATTATTGCAAACCCATTGTGTGTATATTCAATTGGAACATGCAGT  
>HPV1\_Mu\_9626063\_nt1461\_Genome\_Tile|1  
TGCAAACCCATTGTGTGTATATTCAATTGGAACATGCAGTAACTGAAAAAATAGATTTT  
>HPV1\_Mu\_9626063\_nt1481\_Genome\_Tile|1  
ATTCAATTGGAACATGCAGTAACTGAAAAAATAGATTTTTATTATTTTATTGGTACGATTT  
>HPV1\_Mu\_9626063\_nt1501\_Genome\_Tile|1  
AACTGAAAAAATAGATTTTTATTATTTTATTGGTACGATTTAAAGCCCAGAAAAGTAGAGA  
>HPV1\_Mu\_9626063\_nt1521\_Genome\_Tile|1  
TATTTTTATTGGTACGATTTAAAGCCCAGAAAAGTAGAGAGACTGTGATAAACTTATAA  
>HPV1\_Mu\_9626063\_nt1541\_Genome\_Tile|1  
AAAGCCCAGAAAAGTAGAGAGACTGTGATAAACTTATAACCACAATTCTTCCAGTTGAT  
>HPV1\_Mu\_9626063\_nt1561\_Genome\_Tile|1  
GACTGTGATAAACTTATAACCACAATTCTTCCAGTTGATGCTAGCTATATTTTGTCTGA  
>HPV1\_Mu\_9626063\_nt1581\_Genome\_Tile|1  
CCACAATTCTTCCAGTTGATGCTAGCTATATTTTGTCTGAGCCTCCAAAATCAAGAAGTG  
>HPV1\_Mu\_9626063\_nt1661\_Genome\_Tile|1  
TATAAAAGATCTATGTCTTCAACTGTTTTTACATGGGGTACAACCTTTGGAGTGGATTGCA  
>HPV1\_Mu\_9626063\_nt1681\_Genome\_Tile|1  
AACTGTTTTTACATGGGGTACAACCTTTGGAGTGGATTGCACAGCAAACCCCTTATTAATCA  
>HPV1\_Mu\_9626063\_nt1701\_Genome\_Tile|1  
CAACTTTGGAGTGGATTGCACAGCAAACCCCTTATTAATCATCAGTTAGATTCCGAAAGTC  
>HPV1\_Mu\_9626063\_nt1901\_Genome\_Tile|1  
TATGTGAAAAGACTGTGCACAAATGGTAAGACACTATTTACGTGCTGAGATGGCACAAATG  
>HPV1\_Mu\_9626063\_nt1941\_Genome\_Tile|1  
GTGCTGAGATGGCACAAATGTCTATGTCAGAGTGGATTTTGTAGAAAAGTAGATAATGTAG  
>HPV1\_Mu\_9626063\_nt1981\_Genome\_Tile|1  
TAGAAAAGTAGATAATGTAGAAGGTTCTGGTAATTGGAAAGAAATTGTAAGATTTTAAAG  
>HPV1\_Mu\_9626063\_nt2081\_Genome\_Tile|1  
AAAGATTTGTTATGTGGTAAGCCAAAGAAAACTGTTTGTGTTAATATTTGGACCTCCAAAT  
>HPV1\_Mu\_9626063\_nt2121\_Genome\_Tile|1  
TAATATTTGGACCTCCAAATACAGGAAAAATCAATGTTTTGTACAAGTTTATTAAAGTTGT  
>HPV1\_Mu\_9626063\_nt2141\_Genome\_Tile|1  
ACAGGAAAAATCAATGTTTTGTACAAGTTTATTAAAGTTGTTAGGAGGGAAAGTGATTTC  
>HPV1\_Mu\_9626063\_nt2161\_Genome\_Tile|1  
TACAAGTTTATTAAAGTTGTTAGGAGGGAAAGTGATTTTCATACTGTAACAGTAAAAGTCA  
>HPV1\_Mu\_9626063\_nt2321\_Genome\_Tile|1

GATGGTAACACTATTTGTATTGATTTAAACATAGAGCTCCTCAACAAATTAAATGCCCCA  
>HPV1\_Mu\_9626063\_nt2381\_Genome\_Tile|1  
CCTTTACTTATTACTAGTAATATTGATGTTAAATCAGATACCTGTTGGATGTATTTGCAT  
>HPV1\_Mu\_9626063\_nt2401\_Genome\_Tile|1  
TATTGATGTTAAATCAGATACCTGTTGGATGTATTTGCATAGTAGAATATCAGCTTTTAA  
>HPV1\_Mu\_9626063\_nt2421\_Genome\_Tile|1  
CCTGTTGGATGTATTTGCATAGTAGAATATCAGCTTTTAAATTTGCTCATGAGTTTCCAT  
>HPV1\_Mu\_9626063\_nt2441\_Genome\_Tile|1  
AGTAGAATATCAGCTTTTAAATTTGCTCATGAGTTTCCATTTAAAGACAATGGTGATCCA  
>HPV1\_Mu\_9626063\_nt2461\_Genome\_Tile|1  
ATTTGCTCATGAGTTTCCATTTAAAGACAATGGTGATCCAGGATTTTCCTTAACAGACGA  
>HPV1\_Mu\_9626063\_nt2641\_Genome\_Tile|1  
ACCTATATGAACAGGACAGTAAATTGATAGAAGATCAAATTAAGCAGTGGAATCTAATTA  
>HPV1\_Mu\_9626063\_nt2661\_Genome\_Tile|1  
AAATTGATAGAAGATCAAATTAAGCAGTGGAATCTAATTAGACAAGAACAAGTTCTTTTC  
>HPV1\_Mu\_9626063\_nt2721\_Genome\_Tile|1  
CATTTCCGCCAGAAAAAATGGGGTAATGAGAATTGGATTGCAGGCAGTCCATCTTTAGCG  
>HPV1\_Mu\_9626063\_nt2741\_Genome\_Tile|1  
GGTAATGAGAATTGGATTGCAGGCAGTCCATCTTTAGCGTCTCACAGGAGAAGGCAAA  
>HPV1\_Mu\_9626063\_nt2761\_Genome\_Tile|1  
AGGCAGTTCATCTTTAGCGTCTCACAGGAGAAGGCAAAGACAGCTATTGAAATGGTGT  
>HPV1\_Mu\_9626063\_nt2781\_Genome\_Tile|1  
TCCTCACAGGAGAAGGCAAAGACAGCTATTGAAATGGTGTTACATTTAGAGTCTTTAAAG  
>HPV1\_Mu\_9626063\_nt2821\_Genome\_Tile|1  
TACATTTAGAGTCTTTAAAGGACTCACCTTATGGCACAGAGGATTGGTCACTTCAAGACA  
>HPV1\_Mu\_9626063\_nt2921\_Genome\_Tile|1  
CAAGAAGAGTGGCAGCACACTTGAGGTTACCTATGACAATAACCCTGATAATCAGACAAG  
>HPV1\_Mu\_9626063\_nt2941\_Genome\_Tile|1  
TTGAGGTTACCTATGACAATAACCCTGATAATCAGACAAGGCACACAATTTGGAATCATG  
>HPV1\_Mu\_9626063\_nt2961\_Genome\_Tile|1  
AACCCTGATAATCAGACAAGGCACACAATTTGGAATCATGTGTATTATCAAAATGGGGAC  
>HPV1\_Mu\_9626063\_nt3001\_Genome\_Tile|1  
TGTATTATCAAAATGGGGACGATGTATGGAGAAAAGTATCCAGTGGTGTGATGCTGTAG  
>HPV1\_Mu\_9626063\_nt3021\_Genome\_Tile|1  
GATGTATGGAGAAAAGTATCCAGTGGTGTGATGCTGTAGGAGTGTACTATTTAGAACAC  
>HPV1\_Mu\_9626063\_nt3041\_Genome\_Tile|1  
CAGTGGTGTGATGCTGTAGGAGTGTACTATTTAGAACACGATGGCTATAAAAATTATTA  
>HPV1\_Mu\_9626063\_nt3061\_Genome\_Tile|1  
GAGTGTACTATTTAGAACACGATGGCTATAAAAATTATTATGTGTTATTTGCTGAGGAGG  
>HPV1\_Mu\_9626063\_nt3101\_Genome\_Tile|1  
TGTGTTATTTGCTGAGGAGGCCTCTAAGTACAGCACAAACAGGACAATATGCTGTAAATTA  
>HPV1\_Mu\_9626063\_nt3121\_Genome\_Tile|1  
CCTCTAAGTACAGCACAAACAGGACAATATGCTGTAAATTACAGGGGTAAAAGGTTTACAA  
>HPV1\_Mu\_9626063\_nt3141\_Genome\_Tile|1  
GGACAATATGCTGTAAATTACAGGGGTAAAAGGTTTACAAATGTTATGTCTTCCACTAGC  
>HPV1\_Mu\_9626063\_nt3181\_Genome\_Tile|1  
ATGTTATGTCTTCCACTAGCTCCCCAAGGGCTGCTGGGGCTCCTGCAGTACACTCCGACT  
>HPV1\_Mu\_9626063\_nt3201\_Genome\_Tile|1  
TCCCCAAGGGCTGCTGGGGCTCCTGCAGTACACTCCGACTACCCAACCCATCCGAGAGT  
>HPV1\_Mu\_9626063\_nt3241\_Genome\_Tile|1  
ACCCAACCCATCCGAGAGTGACACCGCCAGCAATCGACGTCCATCGACTACACCGAAC  
>HPV1\_Mu\_9626063\_nt3281\_Genome\_Tile|1  
GTCCATCGACTACACCGAACTCCCAGGACAGGGGAGACCTCGCAGGTCCGACAAAGACA  
>HPV1\_Mu\_9626063\_nt3301\_Genome\_Tile|1  
TCCCAGGACAGGGGAGACCTCGCAGGTCCGACAAAGACAGCAGAAAAACACCTGTACGCA

>HPV1\_Mu\_9626063\_nt3381\_Genome\_Tile|1  
AGATCCAGAAGTCCCAGAGGTGGAGGACGAAGAGAAGGAGAATCAACGCCCTCTAGGACA  
>HPV1\_Mu\_9626063\_nt3521\_Genome\_Tile|1  
ACTTCTGCAGGAAGCTTGGGATCCACCCGTGGTCTGTGTAAAAGGGGGGTGCCAATCAGCT  
>HPV1\_Mu\_9626063\_nt3581\_Genome\_Tile|1  
TAAGTGTCTCAGGTACAGACTTAAAGCATCTACTCAAGTTGACTTTGACAGCATAAGCAC  
>HPV1\_Mu\_9626063\_nt3621\_Genome\_Tile|1  
GACTTTGACAGCATAAGCACCATGGCATTGGACAGATAGAAAAAACACCGAGAGGATA  
>HPV1\_Mu\_9626063\_nt3641\_Genome\_Tile|1  
CACATGGCATTGGACAGATAGAAAAAACACCGAGAGGATAGGTAGTGCTAGAATGTTAGT  
>HPV1\_Mu\_9626063\_nt3661\_Genome\_Tile|1  
GAAAAAACACCGAGAGGATAGGTAGTGCTAGAATGTTAGTAAAGTTTATTGATGAGGCTC  
>HPV1\_Mu\_9626063\_nt3681\_Genome\_Tile|1  
GGTAGTGCTAGAATGTTAGTAAAGTTTATTGATGAGGCTCAACGAGAGAAGTTTCTTGAG  
>HPV1\_Mu\_9626063\_nt3701\_Genome\_Tile|1  
AAAGTTTATTGATGAGGCTCAACGAGAGAAGTTTCTTGAGAGAGTTGCTTTGCCAGATC  
>HPV1\_Mu\_9626063\_nt3721\_Genome\_Tile|1  
AACGAGAGAAGTTTCTTGAGAGAGTTGCTTTGCCAGATCAGTGTCTGTGTTTTTGGGAC  
>HPV1\_Mu\_9626063\_nt3741\_Genome\_Tile|1  
AGAGTTGCTTTGCCAGATCAGTGTCTGTGTTTTTGGGACAGTTTAATGGGTCTTAAAT  
>HPV1\_Mu\_9626063\_nt3781\_Genome\_Tile|1  
AGTTTAATGGGTCTTAAATTAATGGAAGTTGATTTTGCTTGGACGTGTGTACATAGTCC  
>HPV1\_Mu\_9626063\_nt3801\_Genome\_Tile|1  
TAATGGAAGTTGATTTTGCTTGGACGTGTGTACATAGTCCCTGTATATATTCCCCTCCTA  
>HPV1\_Mu\_9626063\_nt3821\_Genome\_Tile|1  
TGGACGTGTGTACATAGTCCCTGTATATATTCCCCTCCTACCCCCACATACCTTGAAGCT  
>HPV1\_Mu\_9626063\_nt3841\_Genome\_Tile|1  
CTGTATATATTCCCCTCCTACCCCCACATACCTTGAAGCTTGCAACATTGTAACAAATGT  
>HPV1\_Mu\_9626063\_nt3861\_Genome\_Tile|1  
CCCCACATACCTTGAAGCTTGCAACATTGTAACAAATGTATCGCCTACGTAGAAAACGC  
>HPV1\_Mu\_9626063\_nt3881\_Genome\_Tile|1  
TGCAACATTGTAACAAATGTATCGCCTACGTAGAAAACGCGCTGCCCCCAAAGATATATA  
>HPV1\_Mu\_9626063\_nt3941\_Genome\_Tile|1  
CCCCTCATGCAAAATATCAAACACCTGCCCACCTGACATTCAAATAAAATTGAGCATAC  
>HPV1\_Mu\_9626063\_nt4061\_Genome\_Tile|1  
CATTGGAACAGCCAGAGGCTCTGGAGGAAGAATTGGTTATACTCCCCTCGGTGAGGGTGG  
>HPV1\_Mu\_9626063\_nt4121\_Genome\_Tile|1  
TGGGGTTAGAGTTGCTACTCGTCCAACCTCCAGTAAGGCCTACAATACCTGTGGAACAGT  
>HPV1\_Mu\_9626063\_nt4141\_Genome\_Tile|1  
GTCCAACCTCAGTAAGGCCTACAATACCTGTGGAACAGTAGGCCCCAGTGAAATTTTCC  
>HPV1\_Mu\_9626063\_nt4161\_Genome\_Tile|1  
ACAATACCTGTGGAACAGTAGGCCCCAGTGAAATTTTCCCATAGATGTTGTAGATCCT  
>HPV1\_Mu\_9626063\_nt4201\_Genome\_Tile|1  
CCATAGATGTTGTAGATCCTACAGGCCCTGCTGTTATTCCCCTACAAGATTTAGGTAGAG  
>HPV1\_Mu\_9626063\_nt4221\_Genome\_Tile|1  
ACAGGCCCTGCTGTTATTCCCCTACAAGATTTAGGTAGAGACTTCCCAATACCAACTGTG  
>HPV1\_Mu\_9626063\_nt4241\_Genome\_Tile|1  
CCTACAAGATTTAGGTAGAGACTTCCCAATACCAACTGTGCAGGTTATTGCAGAAATTCA  
>HPV1\_Mu\_9626063\_nt4261\_Genome\_Tile|1  
ACTTCCCAATACCAACTGTGCAGGTTATTGCAGAAATTCACCCTATTTCTGACATACCAA  
>HPV1\_Mu\_9626063\_nt4281\_Genome\_Tile|1  
CAGGTTATTGCAGAAATTCACCCTATTTCTGACATACCAAACATTGTTGCATCTTCAACA  
>HPV1\_Mu\_9626063\_nt4301\_Genome\_Tile|1  
CCCTATTTCTGACATACCAAACATTGTTGCATCTTCAACAAATGAAGGAGAATCTGCCAT  
>HPV1\_Mu\_9626063\_nt4321\_Genome\_Tile|1

ACATTGTTGCATCTTCAACAAATGAAGGAGAATCTGCCATATTAGATGTGTTACGAGGGA  
>HPV1\_Mu\_9626063\_nt4341\_Genome\_Tile|1  
AATGAAGGAGAATCTGCCATATTAGATGTGTTACGAGGGAATGCAACCATACGCACTGTT  
>HPV1\_Mu\_9626063\_nt4361\_Genome\_Tile|1  
ATTAGATGTGTTACGAGGGAATGCAACCATACGCACTGTTTCAAGAACACAATACAATAA  
>HPV1\_Mu\_9626063\_nt4381\_Genome\_Tile|1  
ATGCAACCATACGCACTGTTTCAAGAACACAATACAATAACCCCTCTTTCACTGTTGCAT  
>HPV1\_Mu\_9626063\_nt4401\_Genome\_Tile|1  
TCAAGAACACAATACAATAACCCCTCTTTCACTGTTGCATCTACATCTAATATAAGTGCT  
>HPV1\_Mu\_9626063\_nt4421\_Genome\_Tile|1  
CCCCTCTTTCACTGTTGCATCTACATCTAATATAAGTGCTGGAGAAGCATCAACATCAGA  
>HPV1\_Mu\_9626063\_nt4441\_Genome\_Tile|1  
CTACATCTAATATAAGTGCTGGAGAAGCATCAACATCAGATATTGTATTTGTTAGCAATG  
>HPV1\_Mu\_9626063\_nt4481\_Genome\_Tile|1  
TATTGTATTTGTTAGCAATGGTTCAGGTGACAGGGTGGTGGGCGAGGATATCCCCTTGGT  
>HPV1\_Mu\_9626063\_nt4501\_Genome\_Tile|1  
GTTTCAGGTGACAGGGTGGTGGGCGAGGATATCCCCTTGGTAGAATTAACTTAGGCCTTG  
>HPV1\_Mu\_9626063\_nt4521\_Genome\_Tile|1  
GGCGAGGATATCCCCTTGGTAGAATTAACTTAGGCCTGAAACAGACACATCTTCTGTT  
>HPV1\_Mu\_9626063\_nt4541\_Genome\_Tile|1  
AGAATTAACTTAGGCCTGAAACAGACACATCTTCTGTTGTACAAGAAACAGCATTTTC  
>HPV1\_Mu\_9626063\_nt4561\_Genome\_Tile|1  
AAACAGACACATCTTCTGTTGTACAAGAAACAGCATTTTCCAGCAGCACACCAATTGCTG  
>HPV1\_Mu\_9626063\_nt4581\_Genome\_Tile|1  
GTACAAGAAACAGCATTTTCCAGCAGCACACCAATTGCTGAAAGACCCTCTTTTAGGCC  
>HPV1\_Mu\_9626063\_nt4641\_Genome\_Tile|1  
TCAAGATTCTATAATAGGCGTCTATATGAACAGGTGCAAGTACAAGACCCTAGGTTTCGTT  
>HPV1\_Mu\_9626063\_nt4661\_Genome\_Tile|1  
TCTATATGAACAGGTGCAAGTACAAGACCCTAGGTTTCGTTGAGCAGCCACAGTCAATGGT  
>HPV1\_Mu\_9626063\_nt4741\_Genome\_Tile|1  
TTGAGCCAGAGCTTGATGAGGTGTCTATTATCTTCCAAAGAGACTTAGATGCTCTTGCTC  
>HPV1\_Mu\_9626063\_nt4761\_Genome\_Tile|1  
GTGTCTATTATCTTCCAAAGAGACTTAGATGCTCTTGCTCAGACACCAGTGCCTGAATTT  
>HPV1\_Mu\_9626063\_nt4781\_Genome\_Tile|1  
AGACTTAGATGCTCTTGCTCAGACACCAGTGCCTGAATTTAGAGATGTAGTTTATCTGAG  
>HPV1\_Mu\_9626063\_nt4821\_Genome\_Tile|1  
AGAGATGTAGTTTATCTGAGCAAGCCACATTTTCGCGGGAACCAGGGGGACGGTTAAGG  
>HPV1\_Mu\_9626063\_nt4861\_Genome\_Tile|1  
AACCAGGGGGACGGTTAAGGGTTAGCCGCCCTGGCAAAAGTTCAACTATTCGTACACGCC  
>HPV1\_Mu\_9626063\_nt4881\_Genome\_Tile|1  
GTTAGCCGCCCTGGCAAAAGTTCAACTATTCGTACACGCCTGGGCACAGCAATTGGCGCC  
>HPV1\_Mu\_9626063\_nt4921\_Genome\_Tile|1  
TGGGCACAGCAATTGGCGCCAGAACCCACTTTTTCTATGATTTAAGTTCTATTGCTCCAG  
>HPV1\_Mu\_9626063\_nt4941\_Genome\_Tile|1  
AGAACCCACTTTTTCTATGATTTAAGTTCTATTGCTCCAGAAGACTCAATTGAATTATTG  
>HPV1\_Mu\_9626063\_nt4961\_Genome\_Tile|1  
TTTAAGTTCTATTGCTCCAGAAGACTCAATTGAATTATTGCCTTTAGGTGAGCATAGTCA  
>HPV1\_Mu\_9626063\_nt4981\_Genome\_Tile|1  
AAGACTCAATTGAATTATTGCCTTTAGGTGAGCATAGTCAAACAACAGTCATTAGTTCCA  
>HPV1\_Mu\_9626063\_nt5001\_Genome\_Tile|1  
CCTTTAGGTGAGCATAGTCAAACAACAGTCATTAGTTCCAAGTTAGGTGACACAGCATTT  
>HPV1\_Mu\_9626063\_nt5021\_Genome\_Tile|1  
AACAAACAGTCATTAGTTCCAAGTTAGGTGACACAGCATTTATACAAGGTGAGACAGCAGA  
>HPV1\_Mu\_9626063\_nt5041\_Genome\_Tile|1  
ACTTAGGTGACACAGCATTTATACAAGGTGAGACAGCAGAGGATGACTTAGAAGTTATCT



>HPV1\_Mu\_9626063\_nt5061\_Genome\_Tile|1  
ATACAAGGTGAGACAGCAGAGGATGACTTAGAAGTTATCTCTTTAGAAACACCACAATTA  
>HPV1\_Mu\_9626063\_nt5081\_Genome\_Tile|1  
GGATGACTTAGAAGTTATCTCTTTAGAAACACCACAATTATATTCAGAAGAAGAGCTTTT  
>HPV1\_Mu\_9626063\_nt5101\_Genome\_Tile|1  
CTTTAGAAACACCACAATTATATTCAGAAGAAGAGCTTTTAGACACAAACGAAAGTGTGG  
>HPV1\_Mu\_9626063\_nt5121\_Genome\_Tile|1  
TATTCAGAAGAAGAGCTTTTAGACACAAACGAAAGTGTGGGCGAAAATTTGCAACTTACT  
>HPV1\_Mu\_9626063\_nt5141\_Genome\_Tile|1  
AGACACAAACGAAAGTGTGGGCGAAAATTTGCAACTTACTATTACTAACTCAGAGGGTGA  
>HPV1\_Mu\_9626063\_nt5161\_Genome\_Tile|1  
GCGAAAATTTGCAACTTACTATTACTAACTCAGAGGGTGAGGTTTCTATACTAGATTTAA  
>HPV1\_Mu\_9626063\_nt5181\_Genome\_Tile|1  
ATTACTAACTCAGAGGGTGAGGTTTCTATACTAGATTTAACACAAAGCAGAGTCAGGCCA  
>HPV1\_Mu\_9626063\_nt5201\_Genome\_Tile|1  
GGTTTCTATACTAGATTTAACACAAAGCAGAGTCAGGCCACCTTTTGGCACTGAAGATAC  
>HPV1\_Mu\_9626063\_nt5261\_Genome\_Tile|1  
TAGCTTGCATGTATATTACCCAAATCTTCTAAAGGGACTCCAATAATTAATCCTGAAGA  
>HPV1\_Mu\_9626063\_nt5301\_Genome\_Tile|1  
CCAATAATTAATCCTGAAGAATCATTTACACCTTTTGGTTATTATAGCTCTTAACAACCTCA  
>HPV1\_Mu\_9626063\_nt5321\_Genome\_Tile|1  
ATCATTTACACCTTTGGTTATTATAGCTCTTAACAACCTCAACAGGGGATTTTGAGTTACA  
>HPV1\_Mu\_9626063\_nt5361\_Genome\_Tile|1  
ACAGGGGATTTTGAGTTACATCCTAGTCTTAGAAAGCGTCGTAAAAAGAGCTTATGTATAA  
>HPV1\_Mu\_9626063\_nt5381\_Genome\_Tile|1  
TCCTAGTCTTAGAAAGCGTCGTAAAAAGAGCTTATGTATAATGTTTTTCAGATGGCTGTCT  
>HPV1\_Mu\_9626063\_nt5401\_Genome\_Tile|1  
GTAAAAGAGCTTATGTATAATGTTTTTCAGATGGCTGTCTGGTTACCAGCGCAGAATAAG  
>HPV1\_Mu\_9626063\_nt5441\_Genome\_Tile|1  
GGTTACCAGCGCAGAATAAGTTCTATCTTCCTCCCCAGCCCATCACTAGAATCCTGTCCA  
>HPV1\_Mu\_9626063\_nt5461\_Genome\_Tile|1  
TTCTATCTTCCTCCCCAGCCCATCACTAGAATCCTGTCCACTGATGAATATGTAACCAGA  
>HPV1\_Mu\_9626063\_nt5501\_Genome\_Tile|1  
CTGATGAATATGTAACCAGAACCAATCTCTTCTACCATGCAACATCTGAACGTCTACTGC  
>HPV1\_Mu\_9626063\_nt5541\_Genome\_Tile|1  
AACATCTGAACGTCTACTGCTGGTCGGACATCCTTTGTTTGAGATCTCCAGTAATCAAAC  
>HPV1\_Mu\_9626063\_nt5581\_Genome\_Tile|1  
GAGATCTCCAGTAATCAAACGTAACTATAACCAAAGTGTCACCAAATGCATTTAGAGTT  
>HPV1\_Mu\_9626063\_nt5601\_Genome\_Tile|1  
TGTAACATATACCAAAGTGTCACCAAATGCATTTAGAGTTTTTAGGGTGCGTTTTGCTGA  
>HPV1\_Mu\_9626063\_nt5621\_Genome\_Tile|1  
CACCAAATGCATTTAGAGTTTTTAGGGTGCGTTTTGCTGATCCAAATAGATTTGCATTTG  
>HPV1\_Mu\_9626063\_nt5641\_Genome\_Tile|1  
TTTAGGGTGCGTTTTGCTGATCCAAATAGATTTGCATTTGGGGATAAGGCAATTTTTAAT  
>HPV1\_Mu\_9626063\_nt5741\_Genome\_Tile|1  
AGATAGGTAGAGGCCAGCCTTTAGGTATAGGAATAACGGGCCACCCTCTTTTAAATAAGT  
>HPV1\_Mu\_9626063\_nt5781\_Genome\_Tile|1  
CCACCTCTTTTAAATAAGTTAGATGATGCAGAAAATCCAACAAATTATATTAATACTCA  
>HPV1\_Mu\_9626063\_nt5801\_Genome\_Tile|1  
TAGATGATGCAGAAAATCCAACAAATTATATTAATACTCATGCAAATGGAGATTCTAGAC  
>HPV1\_Mu\_9626063\_nt5921\_Genome\_Tile|1  
CAGGTGAACACTGGACAAGTAGTCGTTGCCAGGGGAACAAGTGAAACTTGGGGACTGCC  
>HPV1\_Mu\_9626063\_nt5961\_Genome\_Tile|1  
AGTGAAACTTGGGGACTGCCCCAGGGTGCAAATGATAGAGTCTGTCATAGAAGATGGTGA  
>HPV1\_Mu\_9626063\_nt6041\_Genome\_Tile|1

GGGCTATGGATTTTGGCTGCTTTACAGCAAGACAAGTCTGATGTCCCTTTAGATGTTGTTTC  
>HPV1\_Mu\_9626063\_nt6081\_Genome\_Tile|1  
TGTCCCTTTAGATGTTGTTCAAGCAACATGCAAATATCCTGATTATATCAGAATGAACCA  
>HPV1\_Mu\_9626063\_nt6101\_Genome\_Tile|1  
AAGCAACATGCAAATATCCTGATTATATCAGAATGAACCATGAAGCCTATGGCAACTCTA  
>HPV1\_Mu\_9626063\_nt6141\_Genome\_Tile|1  
TGAAGCCTATGGCAACTCTATGTTTTTTTTTGCACGTCGCGAGCAAATGTATACCAGGCA  
>HPV1\_Mu\_9626063\_nt6201\_Genome\_Tile|1  
CTTTTTTACTCGCGGGGGTTCGGTGGGTGATAAGGAGGCAGTCCCACAAAGCCTGTATTT  
>HPV1\_Mu\_9626063\_nt6241\_Genome\_Tile|1  
GTCCCACAAAGCCTGTATTTAACAGCAGATGCTGAACCAAGAACAACCTTTAGCAACAACA  
>HPV1\_Mu\_9626063\_nt6261\_Genome\_Tile|1  
AACAGCAGATGCTGAACCAAGAACAACCTTTAGCAACAACAATTATGTAGGCACACCAAG  
>HPV1\_Mu\_9626063\_nt6401\_Genome\_Tile|1  
TTTGCTGGAGAAACCAGTTATTTATTACAGTTGGAGATAATACCAGAGGAACAAGTTTAT  
>HPV1\_Mu\_9626063\_nt6421\_Genome\_Tile|1  
TTTATTACAGTTGGAGATAATACCAGAGGAACAAGTTTATCTATCAGTATGAAAAACAAT  
>HPV1\_Mu\_9626063\_nt6441\_Genome\_Tile|1  
TACCAGAGGAACAAGTTTATCTATCAGTATGAAAAACAATGCAAGTACTACATATTCCAA  
>HPV1\_Mu\_9626063\_nt6461\_Genome\_Tile|1  
CTATCAGTATGAAAAACAATGCAAGTACTACATATTCGAATGCTAATTTTAATGATTTTC  
>HPV1\_Mu\_9626063\_nt6481\_Genome\_Tile|1  
GCAAGTACTACATATTCGAATGCTAATTTTAATGATTTTCTAAGACATACTGAAGAATTT  
>HPV1\_Mu\_9626063\_nt6501\_Genome\_Tile|1  
TGCTAATTTTAATGATTTTCTAAGACATACTGAAGAATTTGATCTTTCTTTTATAGTTCA  
>HPV1\_Mu\_9626063\_nt6521\_Genome\_Tile|1  
TAAGACATACTGAAGAATTTGATCTTTCTTTTATAGTTCAGCTTTGTAAAGTAAAGTTAA  
>HPV1\_Mu\_9626063\_nt6541\_Genome\_Tile|1  
GATCTTTCTTTTATAGTTCAGCTTTGTAAAGTAAAGTTAACTCCCGAAAATCTAGCCTAC  
>HPV1\_Mu\_9626063\_nt6561\_Genome\_Tile|1  
GCTTTGTAAAGTAAAGTTAACTCCCGAAAATCTAGCCTACATTCATACAATGGACCCTAA  
>HPV1\_Mu\_9626063\_nt6641\_Genome\_Tile|1  
TATCTGTATCTCAACCACCTACCAATCCTCTAGAAGATCAATATAGGTTTTTAGGGTCTT  
>HPV1\_Mu\_9626063\_nt6661\_Genome\_Tile|1  
ACCAATCCTCTAGAAGATCAATATAGGTTTTTAGGGTCTTCCTTGGCAGCAAAATGTCCA  
>HPV1\_Mu\_9626063\_nt6701\_Genome\_Tile|1  
CCTTGGCAGCAAAATGTCCAGAACAGGCGCCTCCTGAGCCCCAGACTGATCCTTATAGTC  
>HPV1\_Mu\_9626063\_nt6721\_Genome\_Tile|1  
GAACAGGCGCCTCCTGAGCCCCAGACTGATCCTTATAGTCAATATAAAATCTGGGAAGTC  
>HPV1\_Mu\_9626063\_nt6741\_Genome\_Tile|1  
CCAGACTGATCCTTATAGTCAATATAAAATCTGGGAAGTCGATCTCACAGAAAGGATGTC  
>HPV1\_Mu\_9626063\_nt6761\_Genome\_Tile|1  
AATATAAAATCTGGGAAGTCGATCTCACAGAAAGGATGTCCGAACAATTAGACCAATTTTC  
>HPV1\_Mu\_9626063\_nt6781\_Genome\_Tile|1  
GATCTCACAGAAAGGATGTCCGAACAATTAGACCAATTTCCACTAGGAAGGAAATTTCTA  
>HPV1\_Mu\_9626063\_nt6801\_Genome\_Tile|1  
CGAACAATTAGACCAATTTCCACTAGGAAGGAAATTTCTATATCAAAGTGGCATGACACA  
>HPV1\_Mu\_9626063\_nt6821\_Genome\_Tile|1  
CACTAGGAAGGAAATTTCTATATCAAAGTGGCATGACACAACGTACTGCTACTAGTTCCA  
>HPV1\_Mu\_9626063\_nt6861\_Genome\_Tile|1  
ACGTACTGCTACTAGTTCCACCACAAAGCGCAAAACAGTGC GTGTATCTACGTCAGCCAA  
>HPV1\_Mu\_9626063\_nt6881\_Genome\_Tile|1  
CCACAAAGCGCAAAACAGTGC GTGTATCTACGTCAGCCAAGCGCAGGCGTAAGGCTTAGT  
>HPV1\_Mu\_9626063\_nt6901\_Genome\_Tile|1  
CGTGTATCTACGTCAGCCAAGCGCAGGCGTAAGGCTTAGTATATATTATATATAACTATA

>HPV1\_Mu\_9626063\_nt6921\_Genome\_Tile|1  
GCGCAGGCGTAAGGCTTAGTATATATTATATATAACTATATTTATTAGTAGATTATTTAT  
>HPV1\_Mu\_9626063\_nt6961\_Genome\_Tile|1  
TTTATTAGTAGATTATTTATTATATATTTTATATTTTTTATACTTTTTTATACTTGTTT  
>HPV1\_Mu\_9626063\_nt6981\_Genome\_Tile|1  
TATATATTTTTTATATTTTTTATACTTTTTTATACTTGTTTAGTTCTAAATAGACATGTAAGA  
>HPV1\_Mu\_9626063\_nt7001\_Genome\_Tile|1  
TACTTTTTTATACTTGTTTGTAGTTCTAAATAGACATGTAAGATTTACATTAGTATAAGTAGG  
>HPV1\_Mu\_9626063\_nt7021\_Genome\_Tile|1  
TTCTAAATAGACATGTAAGATTTACATTAGTATAAGTAGGCATGTATTTACATAAAATAG  
>HPV1\_Mu\_9626063\_nt7041\_Genome\_Tile|1  
TTTACATTAGTATAAGTAGGCATGTATTTACATAAAATAGTCTTGGAACCTTTTATTAG  
>HPV1\_Mu\_9626063\_nt7061\_Genome\_Tile|1  
CATGTATTTACATAAAATAGTCTTGGAACCTTTTATTAGTGAACCATCATTTACAATAG  
>HPV1\_Mu\_9626063\_nt7081\_Genome\_Tile|1  
TCTTGGAACCTTTTATTAGTGAACCATCATTTACAATAGTGACATCATAGTTCATCTGC  
>HPV1\_Mu\_9626063\_nt7101\_Genome\_Tile|1  
TGAACCATCATTTACAATAGTGACATCATAGTTCATCTGCAATTGCTATTCCATCGTTCT  
>HPV1\_Mu\_9626063\_nt7121\_Genome\_Tile|1  
TGACATCATAGTTCATCTGCAATTGCTATTCCATCGTTCTTCACATATTCTACAGTAGTG  
>HPV1\_Mu\_9626063\_nt7141\_Genome\_Tile|1  
AATTGCTATTCCATCGTTCTTCACATATTCTACAGTAGTGTTCTCTAGATTGTATTGCTA  
>HPV1\_Mu\_9626063\_nt7161\_Genome\_Tile|1  
TCACATATTCTACAGTAGTGTTCTCTAGATTGTATTGCTATTTTCCTGTTAGGCAAACAA  
>HPV1\_Mu\_9626063\_nt7201\_Genome\_Tile|1  
TTTTCTGTTAGGCAAACAACAACATCTGTACATGGACCAAACAACCCACTTTCATTTTA  
>HPV1\_Mu\_9626063\_nt7221\_Genome\_Tile|1  
CAACATCTGTACATGGACCAAACAACCCACTTTCATTTTATTGTGCTGCATATATTCCAG  
>HPV1\_Mu\_9626063\_nt7241\_Genome\_Tile|1  
AACAACCCACTTTCATTTTATTGTGCTGCATATATTCCAGATTGTTGAGGATTTATTTGT  
>HPV1\_Mu\_9626063\_nt7281\_Genome\_Tile|1  
ATTGTTGAGGATTTATTTGTTTAGACTCCGGTGCATTATACACAAGTGTGCATTTTTTGT  
>HPV1\_Mu\_9626063\_nt7321\_Genome\_Tile|1  
CACAAGTGTGCATTTTTTGTGTTCTCTGATTGATTGTGTGTTATTTTCCTGCAATATGCA  
>HPV1\_Mu\_9626063\_nt7341\_Genome\_Tile|1  
GTTCTCTGATTGATTGTGTGTTATTTTCCTGCAATATGCAATAAAAGTGAGCTGTCCTTT  
>HPV1\_Mu\_9626063\_nt7381\_Genome\_Tile|1  
ATAAAAGTGAGCTGTCCTTTCTTTTTGTTAATCCCTCCCTACTCCAATAAAAAATCCCTA  
>HPV1\_Mu\_9626063\_nt7401\_Genome\_Tile|1  
CTTTTTGTTAATCCCTCCCTACTCCAATAAAAAATCCCTACCCCTAAAAATCTGTTTGTGC  
>HPV1\_Mu\_9626063\_nt7481\_Genome\_Tile|1  
CTCTTTTATATAATAAGTACTATTAACACCGCACCCGTTGTGGCTAATCCCTTATGGTAT  
>HPV1\_Mu\_9626063\_nt7501\_Genome\_Tile|1  
TATTAACACCGCACCCGTTGTGGCTAATCCCTTATGGTATTTAAAAGACTACACCTACAG  
>HPV1\_Mu\_9626063\_nt7521\_Genome\_Tile|1  
TGGCTAATCCCTTATGGTATTTAAAAGACTACACCTACAGGATGTATTGTCTTCATTGTT  
>HPV1\_Mu\_9626063\_nt7581\_Genome\_Tile|1  
TATGGTTTACCGCGCTCCAAAGACGGTTTGCCCAAAGACGGTTTGCCAAACCGCGTTAGG  
>HPV1\_Mu\_9626063\_nt7601\_Genome\_Tile|1  
AGACGGTTTGCCCAAAGACGGTTTGCCAAACCGGTTAGGACTTGTTCATTTGCTGCC  
>HPV1\_Mu\_9626063\_nt7621\_Genome\_Tile|1  
GTTTGCCAAACCGCGGTTAGGACTTGTTCATTTGCTGCCAAACTTATCTGGTCGTGCTC  
>HPV1\_Mu\_9626063\_nt7661\_Genome\_Tile|1  
AAACTTATCTGGTCGTGCTCCAACGGTTTCCTGCCAAGCACCTAAAACGGTAGGTGTGT  
>HPV1\_Mu\_9626063\_nt7681\_Genome\_Tile|1

CAACGGGTTTCCTGCCAAGCACCTAAAACGGTAGGTGTGTACTCTTTTCAAGAATTAACA  
>HPV2\_Alpha\_9626032\_nt3841\_Genome\_Tile|1  
ATATGTCTGCATTTGTATAATCCTACATGCTTGATAAACATATGGTCCAATACATTTCA  
>HPV2\_Alpha\_9626032\_nt4061\_Genome\_Tile|1  
ATATGTGCAGGCCTTTTGGTTTTTACCATAGTCGTTATTATTTTCGCCATACGTTGCTGCT  
>HPV2\_Alpha\_9626032\_nt4081\_Genome\_Tile|1  
TTTTACCATAGTCGTTATTATTTTCGCCATACGTTGCTGCTAGCTTGTATACATAGTCTAT  
>HPV2\_Alpha\_9626032\_nt4101\_Genome\_Tile|1  
TTTCGCCATACGTTGCTGCTAGCTTGTATACATAGTCTATATACCCATTGTGTGAGATTT  
>HPV2\_Alpha\_9626032\_nt4321\_Genome\_Tile|1  
TTTTTATATTGTTTTGATACATTTTCATTTTGATACATTTGTGTTTTTTTTGTATTTGCT  
>HPV2\_Alpha\_9626032\_nt4621\_Genome\_Tile|1  
AGGTTTCGCGACCCACCACTGTAGTTGACATTGGTCCAACGCCAGGCCGCTGTTATCAT  
>HPV2\_Alpha\_9626032\_nt4981\_Genome\_Tile|1  
GGAAATACCAATGCAGACGTTTGCCACGTCGGGGGCAGCGGTACAGAGCCTATCAGTAG  
>HPV2\_Alpha\_9626032\_nt5461\_Genome\_Tile|1  
TTATGCTGATTCGGATGTCCTTCAGCCATTGCTTGATGAGTTACCCGCCGCCCTCGCGG  
>HPV2\_Alpha\_9626032\_nt7201\_Genome\_Tile|1  
CCGTGTCTCGCAAGCGCGCGCTGTTTCGGGGACCACGCCGCCACTAGTAAACGAAAAC  
>HPV2\_Alpha\_9626032\_nt7301\_Genome\_Tile|1  
TTCTACTTTTACATATTATTTTGTGTCTGTAATATGTTTATGTTGTTGTTGTGCTTAT  
>HPVRTRX7\_Unclassified\_30315616\_nt0181\_Genome\_Tile|1  
TTTTGCAACTGTGATTGGGACAAATGGCTCAGCAGACTACACCAGACCAACAGAAACCTA  
>HPVRTRX7\_Unclassified\_30315616\_nt0481\_Genome\_Tile|1  
CAGTTTTAGGTAGAGATATAGAGCTAGCTACAGGAAAGTCAATATTTGAATTGAAAATCA  
>HPVRTRX7\_Unclassified\_30315616\_nt0521\_Genome\_Tile|1  
AATATTTGAATTGAAAATCAGGTGTCAGACTTGCTTATCATTTTTTGAGCACCATTGAAAA  
>HPVRTRX7\_Unclassified\_30315616\_nt3621\_Genome\_Tile|1  
ACTAGGAGTCGGAGGTCAGAATCCAGATCACAATCCCAGAAGTACCTCCAGCCGAAGGCA  
>HPVRTRX7\_Unclassified\_30315616\_nt3761\_Genome\_Tile|1  
CTCCCAACGGTCACAACGGGGAGGGAGAGACAGAGGGGAAAGAGGAAGTAGGAGCTGTAG  
>HPVRTRX7\_Unclassified\_30315616\_nt3781\_Genome\_Tile|1  
GAGGGAGAGACAGAGGGGAAAGAGGAAGTAGGAGCTGTAGGGGGTGCGGTAGGGGAACAG  
>HPVRTRX7\_Unclassified\_30315616\_nt4281\_Genome\_Tile|1  
GCTACTAACACCCTAACATTACAGAAATAGTATAGTTTAACATTTTTTTACTTTTTTAT  
>HPVRTRX7\_Unclassified\_30315616\_nt4781\_Genome\_Tile|1  
CTGAAGGTCCCATAGTTGACTCGCCTGTTGTGACCACCAGCAGAGGCTCAAGTGCCATAC  
>HPVRTRX7\_Unclassified\_30315616\_nt5081\_Genome\_Tile|1  
CACCACGGCGCAGTAGCACACCACTTCAAAGAGCACTATCCATTGGCAGGCGTAGGGGGC  
>HPVRTRX7\_Unclassified\_30315616\_nt5101\_Genome\_Tile|1  
CCACTTCAAAGAGCACTATCCATTGGCAGGCGTAGGGGGCCTTCTCTAACAAATAGAAGG  
>HPVRTRX7\_Unclassified\_30315616\_nt5161\_Genome\_Tile|1  
TTAGTTCAGCAAGTACAAGTAGACAATCCTTTATTTGTTTCTCGACCATCCAAATTAGTA  
>HPVRTRX7\_Unclassified\_30315616\_nt5181\_Genome\_Tile|1  
AGACAATCCTTTATTTGTTTCTCGACCATCCAAATTAGTAAGGTTTGCTTTTGATAATCC  
>HPVRTRX7\_Unclassified\_30315616\_nt5301\_Genome\_Tile|1  
CCCTGATAGGGATTTTTTAGACATTCGAAACTGGGACGACCCCAATACTCAACAACACC  
>HPVRTRX7\_Unclassified\_30315616\_nt5321\_Genome\_Tile|1  
ACATTCGCAAACTGGGACGACCCCAATACTCAACAACACCTGCAGGTTATGTTAGGGTAA  
>HPVRTRX7\_Unclassified\_30315616\_nt5521\_Genome\_Tile|1  
GCGACCATCATACAAGGTACTGTGGAAGTACGTTTCATAGACATGGATACAGCAGAAAAT  
>HPVRTRX7\_Unclassified\_30315616\_nt5541\_Genome\_Tile|1  
TGTGGAAGTACGTTTCATAGACATGGATACAGCAGAAAATCCTTTGTCTGAGAGTATTGA  
>HPVRTRX7\_Unclassified\_30315616\_nt5781\_Genome\_Tile|1  
AGATACTGCAGAAATAATTTATCCTACACCAGACATTCCCGTGGTGGTCATTCATACCCA

>HPV90\_Alpha\_22138122\_nt0161\_Genome\_Tile|1  
ATCCTACACCAGACATTCCCGTGGTGGTCATTCATACCCATGATAGCAGTGGTGACTTTT  
>HPV90\_Alpha\_22138122\_nt0861\_Genome\_Tile|1  
GAAAGCATTTTCCATTTGCAGCATGTCCCTGCGTGTCTGGAAGCAGCCGGGAACTAAGGC  
>HPV90\_Alpha\_22138122\_nt1261\_Genome\_Tile|1  
GTGACAGCGGACAGGACATGGTTGATTTTATTGATAATAGTAGGCATCCCGGGGATGGAC  
>HPV90\_Alpha\_22138122\_nt2061\_Genome\_Tile|1  
AGTTACAGCACCGGCACAATCAGGTACAGATGCTATCCTGTCTCTGCTTAAAACAAGTAA  
>HPV90\_Alpha\_22138122\_nt3641\_Genome\_Tile|1  
ACGACATAGAGTTTATTACCTTTGTAATATCGCTGAAAACTTTTTTAAAAGGCATACCAA  
>HPV90\_Alpha\_22138122\_nt3661\_Genome\_Tile|1  
TGTAACCTGTGGCATGATAGTGCGGAACAAAGGGCAACCTTCCTATCAACCATAACCTT  
>HPV90\_Alpha\_22138122\_nt3741\_Genome\_Tile|1  
GTGCGGAACAAAGGGCAACCTTCCTATCAACCATAACCTTACCTAAAGACATTGAAGCAG  
>HPV90\_Alpha\_22138122\_nt3761\_Genome\_Tile|1  
TTCCTATCAACCATAACCTTACCTAAAGACATTGAAGCAGTACTGGGGTACATGACTATG  
>HPV90\_Alpha\_22138122\_nt3771\_Genome\_Tile|1  
TACTGGGGTACATGACTATGTTAGCATAATATACTGGTATATTGTAAATATATGTAACT  
>HPV90\_Alpha\_22138122\_nt3781\_Genome\_Tile|1  
TTAGCATAATATACTGGTATATTGTAAATATATGTAACTGTGTACAGTGCGGAACGTTA  
>HPV90\_Alpha\_22138122\_nt3821\_Genome\_Tile|1  
ATTGTAAATATATGTAACTGTGTACAGTGCGGAACGTTAAGGGACATCTGTTGTATACA  
>HPV90\_Alpha\_22138122\_nt3841\_Genome\_Tile|1  
GTGTGGAGACCTTTATTTGCTACTTGTCTGCCTGGACACAACCTGCTGCTAATACTAATCT  
>HPV90\_Alpha\_22138122\_nt3901\_Genome\_Tile|1  
TACTTGTCTGCCTGGACACAACCTGCTGCTAATACTAATCTTCTTTTGGCTGTCTATCCTT  
>HPV90\_Alpha\_22138122\_nt4061\_Genome\_Tile|1  
CCTGGCGTTACTGCTTTTCTTATTGTATTCCTTACTGTGTTTCTAGGCCCTCCTGATCATA  
>HPV90\_Alpha\_22138122\_nt4161\_Genome\_Tile|1  
CAATAGTAGTATGTATCCTGTTGTAGTACGTGATAGAGATGGGGGGGAATATCCTGTAGT  
>HPV90\_Alpha\_22138122\_nt4181\_Genome\_Tile|1  
TTGCTTTTTCGTGTGTCTTATTTTGTATTATTTTACCTGCGTCTGTTGCAGTAGTTACCT  
>HPV90\_Alpha\_22138122\_nt4201\_Genome\_Tile|1  
TTTGTATTATTTTACCTGCGTCTGTTGCAGTAGTTACCTTACCCATTGTACCTATATGT  
>HPV90\_Alpha\_22138122\_nt4221\_Genome\_Tile|1  
GTCTGTTGCAGTAGTTACCTTACCCATTGTACCTATATGTATTGTATACACAGTGTATGT  
>HPV90\_Alpha\_22138122\_nt4261\_Genome\_Tile|1  
TACCCATTGTACCTATATGTATTGTATACACAGTGTATGTAGACACATGTAGTGGGTTTG  
>HPV90\_Alpha\_22138122\_nt4281\_Genome\_Tile|1  
AGACACATGTAGTGGGTTTGTGGGTGTCATACATTTATTGGGTGTGGGTATTTCATTATA  
>HPV90\_Alpha\_22138122\_nt4481\_Genome\_Tile|1  
TGGGTGTCATACATTTATTGGGTGTGGGTATTTCATTATAGTGGTGTGGTGTGGTGTGTTT  
>HPV90\_Alpha\_22138122\_nt4701\_Genome\_Tile|1  
GTCCCTCCGATGTGATCAATAAGGTGGAACACACCACACTTGCAGACAAAATCCTGCAAT  
>HPV90\_Alpha\_22138122\_nt5081\_Genome\_Tile|1  
CGATCCTTCTATTGTCACATTGGTGGAGGATTCCAGCATAATTGCATCGGGCTCTCCCCA  
>HPV90\_Alpha\_22138122\_nt5101\_Genome\_Tile|1  
TGTACAGCAGGGCATAACCAACAAGTACATGTACAGGACCCAGGTTTTTATCACAGCCTG  
>HPV90\_Alpha\_22138122\_nt5161\_Genome\_Tile|1  
CAAGTACATGTACAGGACCCAGGTTTTTATCACAGCCTGAAACACTTGTTACCTATGAC  
>HPV90\_Alpha\_22138122\_nt5361\_Genome\_Tile|1  
AATCCTGTATTTGACACAGAGGAAACCATACTATTTGAGCATCCTAGTATTCATCAGGTC  
>HPV90\_Alpha\_22138122\_nt5381\_Genome\_Tile|1  
TTTTTATCAGGATTTAAGCCCTATTGCACCTGTTGCTGACGAGCTGGAAATGCAACCTTT

CTATTGCACCTGTTGCTGACGAGCTGGAAATGCAACCTTTGGTTTCTGACACTCCTGATT  
>HPV90\_Alpha\_22138122\_nt5461\_Genome\_Tile|1  
ATATATGCTGACACTGCTTCTGTGTCCCGTCACCGCACCTTGACCCCTACACGCCCCCTCC  
>HPV90\_Alpha\_22138122\_nt5481\_Genome\_Tile|1  
TGTGTCCCGTCACCGCACCTTGACCCCTACACGCCCCCTCCACACCTTTACAGGCTCCATC  
>HPV90\_Alpha\_22138122\_nt5521\_Genome\_Tile|1  
ACACCTTTACAGGCTCCATCAGTGACTGCATCGTCTGCCCTATCATCTGCAGCATCCAAT  
>HPV90\_Alpha\_22138122\_nt5541\_Genome\_Tile|1  
AGTGACTGCATCGTCTGCCCTATCATCTGCAGCATCCAATACCACTGTGCCTCTATCTAC  
>HPV90\_Alpha\_22138122\_nt5561\_Genome\_Tile|1  
TATCATCTGCAGCATCCAATACCACTGTGCCTCTATCTACAGGCTGGATATTCCTGTCT  
>HPV90\_Alpha\_22138122\_nt5581\_Genome\_Tile|1  
ACCACTGTGCCTCTATCTACAGGCTGGATATTCCTGTCTTTAGTGGGCCTGACAGTGCC  
>HPV90\_Alpha\_22138122\_nt5701\_Genome\_Tile|1  
TCTGTTCTTGTAATGGGTCCACATATTATTTGTTGCCCCATTAGGTTTGCTACCTAAA  
>HPV90\_Alpha\_22138122\_nt6261\_Genome\_Tile|1  
TATTTATTATAGGGTGC AAACCTCCTTTAGGCGAGCACTGGGCAAAGGGTACCCCATGCA  
>HPV90\_Alpha\_22138122\_nt6301\_Genome\_Tile|1  
GGCAAAGGGTACCCCATGCAATATGTCTAATGTACAGGCTGGGGATTGCCCTCCTATAGA  
>HPV90\_Alpha\_22138122\_nt6561\_Genome\_Tile|1  
TTATAAGGCACCTTTTATAACAGAGCAGGTACTATGGGCGACGCAATTCCCGATGGCTTTG  
>HPV90\_Alpha\_22138122\_nt6581\_Genome\_Tile|1  
AGAGCAGGTACTATGGGCGACGCAATTCCCGATGGCTTTGTGCTAAAAGGAACATCTTCT  
>HPV90\_Alpha\_22138122\_nt6601\_Genome\_Tile|1  
CGCAATTCCCGATGGCTTTGTGCTAAAAGGAACATCTTCTACCTCTCGTGGCACTCCTAC  
>HPV90\_Alpha\_22138122\_nt7261\_Genome\_Tile|1  
ACCCTCTACCGCCCCCTCTACAAAACGTAAACGGTCCAAACGTTCCCTAAGCATGTTATGT  
>HPV90\_Alpha\_22138122\_nt7321\_Genome\_Tile|1  
GTGTGTCTGTTGTATGCTGATGTTTACTGTGTCTGTACACGGGTTCCCTGTACTGTTGTG  
>HPV90\_Alpha\_22138122\_nt7501\_Genome\_Tile|1  
ACATAACATATATGTGTGGTGTCTGTATGTGACCCGGCCGTCCCCTAGCCTTTAATACC  
>HPV90\_Alpha\_22138122\_nt7701\_Genome\_Tile|1  
GGCCAGCTATACATTTCTTTTACAATATTTATTGTCTGTGTTACTCACACTCCAATAAAT  
>HPV90\_Alpha\_22138122\_nt7821\_Genome\_Tile|1  
AAATTTGCTTTTCTATTCAACAATGTGTCTTGTAATCCTACTGTACAACCTTCAAACATG  
>HPV54\_Alpha\_9628437\_nt0061\_Genome\_Tile|1  
TACATATAAAAAGCGTTGTAGAAAACAGTTATTTGGGGGCAATGTCTGCTACTGAACCCC  
>HPV54\_Alpha\_9628437\_nt0141\_Genome\_Tile|1  
CTAGCTGATTTGTGCAAGGTATGCAATATTCCTATGCATAGTTTGCAACTTCCTTGTGCC  
>HPV54\_Alpha\_9628437\_nt0161\_Genome\_Tile|1  
ATGCAATATTCCTATGCATAGTTTGCAACTTCCTTGTGCCTTTTGCAAGAAGACGGTGTG  
>HPV54\_Alpha\_9628437\_nt0181\_Genome\_Tile|1  
GTTTGCAACTTCCTTGTGCCTTTTGCAAGAAGACGGTGTGTACAGCAGAGATTTATGCAT  
>HPV54\_Alpha\_9628437\_nt0201\_Genome\_Tile|1  
TTTTTGCAAGAAGACGGTGTGTACAGCAGAGATTTATGCATTTCAATATAAGGACCTATTT  
>HPV54\_Alpha\_9628437\_nt0221\_Genome\_Tile|1  
TACAGCAGAGATTTATGCATTTCAATATAAGGACCTATTTGTGGTGTGGAGACACGGCTT  
>HPV54\_Alpha\_9628437\_nt0281\_Genome\_Tile|1  
TCCACATGCTGCATGTGCACTGTGCCTAGAACTGCACGGGCAAATAAATTATAGAAGGCA  
>HPV54\_Alpha\_9628437\_nt0321\_Genome\_Tile|1  
CAAATAAATTATAGAAGGCATCGCGACCGTGCCTGTGGGAAACAGTGGAACAAGAG  
>HPV54\_Alpha\_9628437\_nt0441\_Genome\_Tile|1  
AACGTGGAAAAGCAACGGCACGTAGATTACAACAGGCGATTCCACTGTGTTAGAGGCTAT  
>HPV54\_Alpha\_9628437\_nt0461\_Genome\_Tile|1  
CGTAGATTACAACAGGCGATTCCACTGTGTTAGAGGCTATTGGAAGGGTAGGTGTCTACA

>HPV54\_Alpha\_9628437\_nt0481\_Genome\_Tile|1  
TCCACTGTGTTAGAGGCTATTGGAAGGGTAGGTGTCTACATTGCTGGAAGCCATAATGCA  
>HPV54\_Alpha\_9628437\_nt0541\_Genome\_Tile|1  
TGGAAATGTGGCTACAATTGAGGATATAGTCCTTGATTTAAACCAGAACCGTTTGACCT  
>HPV54\_Alpha\_9628437\_nt0561\_Genome\_Tile|1  
AGGATATAGTCCTTGATTTAAACCAGAACCGTTTGACCTGTACTGCAGGGAGCAATTAG  
>HPV54\_Alpha\_9628437\_nt0621\_Genome\_Tile|1  
AAGACTCTGATGCAGAAGATGAGACAGCAGTAACACAACCTGACAAACAAGCATTTAAGG  
>HPV54\_Alpha\_9628437\_nt0641\_Genome\_Tile|1  
GAGACAGCAGTAACACAACCTGACAAACAAGCATTTAAGGTGTTAAGCCAGTGTGGAGGT  
>HPV54\_Alpha\_9628437\_nt0661\_Genome\_Tile|1  
TGACAAACAAGCATTTAAGGTGTTAAGCCAGTGTGGAGGTGTGTGTTGTAAGACAGTACG  
>HPV54\_Alpha\_9628437\_nt0681\_Genome\_Tile|1  
TGTTAAGCCAGTGTGGAGGTGTGTGTTGTAAGACAGTACGGCTATGTGTGTATAGCACGC  
>HPV54\_Alpha\_9628437\_nt0701\_Genome\_Tile|1  
GTGTGTTGTAAGACAGTACGGCTATGTGTGTATAGCACGCACACAGGCATAAGGGTACTG  
>HPV54\_Alpha\_9628437\_nt0721\_Genome\_Tile|1  
GCTATGTGTGTATAGCACGCACACAGGCATAAGGGTACTGCAGGAAGTCTTCATCAGGA  
>HPV54\_Alpha\_9628437\_nt0741\_Genome\_Tile|1  
ACACAGGCATAAGGGTACTGCAGGAAGTCTTCATCAGGACGCACTGCAAAATAGTGTGTC  
>HPV54\_Alpha\_9628437\_nt0961\_Genome\_Tile|1  
TTGATATGGTGGACTTTATTGATAATAGTGTGTACAGGTAGAGGGGCAGGAAAATCCAC  
>HPV54\_Alpha\_9628437\_nt0981\_Genome\_Tile|1  
GATAATAGTGTGTACAGGTAGAGGGGCAGGAAAATCCACAGGCATTGTTACATGCCCAA  
>HPV54\_Alpha\_9628437\_nt1001\_Genome\_Tile|1  
AGAGGGGCAGGAAAATCCACAGGCATTGTTACATGCCCAACAGCTGCAGGCAGATGTAGA  
>HPV54\_Alpha\_9628437\_nt1021\_Genome\_Tile|1  
AGGCATTGTTACATGCCCAACAGCTGCAGGCAGATGTAGAGGCAGTGCAACAATTAAAC  
>HPV54\_Alpha\_9628437\_nt1101\_Genome\_Tile|1  
TATGTAAGTCCTGTTGCAAACAGCGAACCTGTGTAGAAAAGGACCTAAGCCCCCGGCTA  
>HPV54\_Alpha\_9628437\_nt1121\_Genome\_Tile|1  
CAGCGAACCTGTGTAGAAAAGGACCTAAGCCCCCGGCTAGGGGCTATATCCCTAGGACG  
>HPV54\_Alpha\_9628437\_nt1161\_Genome\_Tile|1  
GGGGCTATATCCCTAGGACGGCGGTCAGCCAAAGCCAAACGACGGCTGTTTGATAAGGCC  
>HPV54\_Alpha\_9628437\_nt1221\_Genome\_Tile|1  
CAACCGCCGCCAAATGGCCATACTGACGTGGAAGCTGCGGTGGAGGTAAATACCGAGGGG  
>HPV54\_Alpha\_9628437\_nt1241\_Genome\_Tile|1  
TACTGACGTGGAAGCTGCGGTGGAGGTAAATACCGAGGGGACAGATGAAACAGAGACAGA  
>HPV54\_Alpha\_9628437\_nt1261\_Genome\_Tile|1  
TGGAGGTAAATACCGAGGGGACAGATGAAACAGAGACAGACCAGGTGCAGACAGTATCTG  
>HPV54\_Alpha\_9628437\_nt1281\_Genome\_Tile|1  
ACAGATGAAACAGAGACAGACCAGGTGCAGACAGTATCTGGGGAAACAACACTACAGATAGC  
>HPV54\_Alpha\_9628437\_nt1321\_Genome\_Tile|1  
GGGAAACAACACTACAGATAGCCTAGGAAGGCAGCAAATTACAGAATTAATACATAACACAA  
>HPV54\_Alpha\_9628437\_nt1341\_Genome\_Tile|1  
CTAGGAAGGCAGCAAATTACAGAATTAATACATAACACAAATATTCGTGTAGCATTGTTT  
>HPV54\_Alpha\_9628437\_nt1361\_Genome\_Tile|1  
AGAATTAATACATAACACAAATATTCGTGTAGCATTGTTTGGTATGTTTAAAGACCTATA  
>HPV54\_Alpha\_9628437\_nt1381\_Genome\_Tile|1  
ATATTCGTGTAGCATTGTTTGGTATGTTTAAAGACCTATATGGATTAAGTTTATGGACC  
>HPV54\_Alpha\_9628437\_nt1521\_Genome\_Tile|1  
GATGGATTTAAACATTGCTAGAGCCACATTGTTTGTATGGCCATATCCAATGGCTAACA  
>HPV54\_Alpha\_9628437\_nt1601\_Genome\_Tile|1  
ATTATTATTAAACAAGATTTAAATGTGGCAAAAACAGATTAACAGTAAGTAAATGTTTAGG  
>HPV54\_Alpha\_9628437\_nt1641\_Genome\_Tile|1

ACAGTAAGTAAATGTTTAGGAATGTTATTAAATATACCAGAAACCCAAATGTTAATAGAT  
>HPV54\_Alpha\_9628437\_nt1761\_Genome\_Tile|1  
GCAAGTGAAATATTTGGTACACCCCGGAATGGCTGGCCAGACAAACTGTAATTGAATAT  
>HPV54\_Alpha\_9628437\_nt1801\_Genome\_Tile|1  
GACAAACTGTAATTGAATATAGCTTAGCAGACAGCCAGTTTGATTATCTAAAATGGTAC  
>HPV54\_Alpha\_9628437\_nt1881\_Genome\_Tile|1  
TATATTGATGACAGTATTATTGCCCTGGAATATGCTAAATTAGCTGATATAGATGAAAAT  
>HPV54\_Alpha\_9628437\_nt1901\_Genome\_Tile|1  
TGCCCTGGAATATGCTAAATTAGCTGATATAGATGAAAATGCGGCTGCCTTTCTAGGAAG  
>HPV54\_Alpha\_9628437\_nt2041\_Genome\_Tile|1  
TGTCACAATGGATTAAACATCGTTGTGATTTAGTAGAGGAGGAAGGTGAGTGAAGGAAA  
>HPV54\_Alpha\_9628437\_nt2081\_Genome\_Tile|1  
GGAAGGTGAGTGAAGGAAATAGTACGATTCCTTAGATATCAACATGTGGATTTTATATC  
>HPV54\_Alpha\_9628437\_nt2101\_Genome\_Tile|1  
TAGTACGATTCCTTAGATATCAACATGTGGATTTTATATCTTTTATGATAGCATTAAAC  
>HPV54\_Alpha\_9628437\_nt2121\_Genome\_Tile|1  
CAACATGTGGATTTTATATCTTTTATGATAGCATTAAACAATTTTACAAGGCATACCA  
>HPV54\_Alpha\_9628437\_nt2221\_Genome\_Tile|1  
GAAAATCTAATTTGCCATGAGTTAATTAGCTTTTTAGGAGGTGAGTGCTATCATATG  
>HPV54\_Alpha\_9628437\_nt2421\_Genome\_Tile|1  
AGAAAACATCGAGCTATGGTGCAAACAAATGTCCTCCACTAATAGTGACCTCCAACATA  
>HPV54\_Alpha\_9628437\_nt2441\_Genome\_Tile|1  
GCAAACAAAATGTCCTCCACTAATAGTGACCTCCAACATAAATGCTAGTACAGACGACAG  
>HPV54\_Alpha\_9628437\_nt2461\_Genome\_Tile|1  
TAATAGTGACCTCCAACATAAATGCTAGTACAGACGACAGATGGCGCTACCTACACAGTA  
>HPV54\_Alpha\_9628437\_nt2501\_Genome\_Tile|1  
ATGGCGCTACCTACACAGTAGAGTAAATGTTTTGTTTTCCCAATAGATTTCCATTTGA  
>HPV54\_Alpha\_9628437\_nt2521\_Genome\_Tile|1  
GAGTAAAATGTTTTGTTTTCCCAATAGATTTCCATTTGATAGTAATGGAAACCCTGTGT  
>HPV54\_Alpha\_9628437\_nt2541\_Genome\_Tile|1  
CCCAATAGATTTCCATTTGATAGTAATGGAAACCCTGTGTATGATTTAAGTAATAAAAAAT  
>HPV54\_Alpha\_9628437\_nt2561\_Genome\_Tile|1  
TAGTAATGGAAACCCTGTGTATGATTTAAGTAATAAAAAATTGGAAATCATTCCTTTAAAG  
>HPV54\_Alpha\_9628437\_nt2581\_Genome\_Tile|1  
ATGATTTAAGTAATAAAAAATTGGAAATCATTCCTTTAAAGGTCATGGTCACGTTTAGCGC  
>HPV54\_Alpha\_9628437\_nt2601\_Genome\_Tile|1  
TGGAAATCATTCCTTTAAAGGTCATGGTCAAGTTTAGCGCTGAACGACAACGATAACGAG  
>HPV54\_Alpha\_9628437\_nt2741\_Genome\_Tile|1  
ATAAACTAGAGGACCAAATAGAACATTGGAAATGCATACGCCTGGAGTGTGCATTGCAAT  
>HPV54\_Alpha\_9628437\_nt2881\_Genome\_Tile|1  
AAGGCCATTGAACTGCAACTGCATTAGAGACATTGCAAAAGACAGTATACAGCACCGAA  
>HPV54\_Alpha\_9628437\_nt2961\_Genome\_Tile|1  
ATGCCTGGAACGGTGAATGCACCACCAACTGGTTGCTTAAAAAGACGTGGACAAACAGT  
>HPV54\_Alpha\_9628437\_nt2981\_Genome\_Tile|1  
CACCACCAACTGGTTGCTTAAAAAGACGTGGACAAACAGTAGATGTTATATTTGATGGGC  
>HPV54\_Alpha\_9628437\_nt3001\_Genome\_Tile|1  
AAAAGACGTGGACAAACAGTAGATGTTATATTTGATGGGCATCAGGATAACACAATGCAA  
>HPV54\_Alpha\_9628437\_nt3021\_Genome\_Tile|1  
AGATGTTATATTTGATGGGCATCAGGATAACACAATGCAATATGTAATGTGGGGAGATAT  
>HPV54\_Alpha\_9628437\_nt3041\_Genome\_Tile|1  
ATCAGGATAACACAATGCAATATGTAATGTGGGGAGATATTTATTATCAAAACTGTGATG  
>HPV54\_Alpha\_9628437\_nt3061\_Genome\_Tile|1  
TATGTAATGTGGGGAGATATTTATTATCAAAACTGTGATGGGGAGGGATGGACTAAGGTG  
>HPV54\_Alpha\_9628437\_nt3081\_Genome\_Tile|1  
TTATTATCAAAACTGTGATGGGGAGGGATGGACTAAGGTGTGCAGTAATATAGATGCAAT



>HPV54\_Alpha\_9628437\_nt3101\_Genome\_Tile|1  
GGGAGGGATGGACTAAGGTGTGCAGTAATATAGATGCAATGGGTATTTATTATATGGATG  
>HPV54\_Alpha\_9628437\_nt3121\_Genome\_Tile|1  
TGCAGTAATATAGATGCAATGGGTATTTATTATATGGATGCAGAACACAAAGTGTATTAT  
>HPV54\_Alpha\_9628437\_nt3141\_Genome\_Tile|1  
GGGTATTTATTATATGGATGCAGAACACAAAGTGTATTATGTGGATTTTAAAAAGGAAGC  
>HPV54\_Alpha\_9628437\_nt3161\_Genome\_Tile|1  
CAGAACACAAAGTGTATTATGTGGATTTTAAAAAGGAAGCATCTAAGTATGGGGAATATG  
>HPV54\_Alpha\_9628437\_nt3181\_Genome\_Tile|1  
GTGGATTTTAAAAAGGAAGCATCTAAGTATGGGGAATATGGACAGTGGGAGGTGCGTATG  
>HPV54\_Alpha\_9628437\_nt3201\_Genome\_Tile|1  
ATCTAAGTATGGGGAATATGGACAGTGGGAGGTGCGTATGGGCAGCAGCATCATTTTTTTC  
>HPV54\_Alpha\_9628437\_nt3281\_Genome\_Tile|1  
CCGAAGAGGCATTGTCAATATCCTCTACTGGCACTGCTGAACACACCAGACCAGCCAATT  
>HPV54\_Alpha\_9628437\_nt3321\_Genome\_Tile|1  
ACACACCAGACCAGCCAATTCACACCACGTACCGACAACCTCCACAAAAGCAATCCCGTG  
>HPV54\_Alpha\_9628437\_nt3341\_Genome\_Tile|1  
CCACACCACGTACCGACAACCTCCACAAAAGCAATCCCGTGCACGCCGCCCTAGAAAAC  
>HPV54\_Alpha\_9628437\_nt3401\_Genome\_Tile|1  
GAGCTAGAGTCTACAGCACAGACCAGCAACCACACAGCACCTCAGACCCCGTGGGCTGTG  
>HPV54\_Alpha\_9628437\_nt3441\_Genome\_Tile|1  
CTCAGACCCCGTGGGCTGTGACAACGACAGGCACATCAGTGACGATAACAACAAGAACCA  
>HPV54\_Alpha\_9628437\_nt3461\_Genome\_Tile|1  
ACAACGACAGGCACATCAGTGACGATAACAACAAGAACCAAGGACGGCACACAAGTAGTG  
>HPV54\_Alpha\_9628437\_nt3541\_Genome\_Tile|1  
CACTTTAAAGGTGAACCTAATACATTAATAATGTTTTAGGCAAAGAATACAAAAGTATAAA  
>HPV54\_Alpha\_9628437\_nt3621\_Genome\_Tile|1  
CTCAACATGGCATTGGGCATGTGTACCAGGTACCCTAAGAATAGGGGCATTGTAACATT  
>HPV54\_Alpha\_9628437\_nt3641\_Genome\_Tile|1  
GTGTACCAGGTACCCTAAGAATAGGGGCATTGTAACATTAACCTATAGTAGTGTAGAAC  
>HPV54\_Alpha\_9628437\_nt3661\_Genome\_Tile|1  
AATAGGGGCATTGTAACATTAACCTATAGTAGTGTAGAACAAAGGCAACAATTTTTAGTA  
>HPV54\_Alpha\_9628437\_nt3681\_Genome\_Tile|1  
AACCTATAGTAGTGTAGAACAAAGGCAACAATTTTTAGTAAGTGTTCGCATTCCACCTAG  
>HPV54\_Alpha\_9628437\_nt3701\_Genome\_Tile|1  
AAAGGCAACAATTTTTAGTAAGTGTTCGCATTCCACCTAGTATATCTATGTCATTAGGGG  
>HPV54\_Alpha\_9628437\_nt3741\_Genome\_Tile|1  
TATATCTATGTCATTAGGGGTAATGTCATTATAACAGATAATCATTGTAAAGTTTGTGAT  
>HPV54\_Alpha\_9628437\_nt3761\_Genome\_Tile|1  
TAATGTCATTATAACAGATAATCATTGTAAAGTTTGTGATTGTACATACTATATTGTAAA  
>HPV54\_Alpha\_9628437\_nt3881\_Genome\_Tile|1  
TGAGTGCATGCAGGCCTGCAGTGACTGAGGTGAGGTGTGTGTAGGTGTGTGTAGTGTA  
>HPV54\_Alpha\_9628437\_nt3901\_Genome\_Tile|1  
GTGACTGAGGTGAGGTGTGTGTGTAGGTGTGTGTAGTGTATGCAGTAATAATGTTGTATA  
>HPV54\_Alpha\_9628437\_nt3941\_Genome\_Tile|1  
TGCAGTAATAATGTTGTATACAGTAAGTTGGTTAACATGTTGGTTTTATTATCCATGTT  
>HPV54\_Alpha\_9628437\_nt3961\_Genome\_Tile|1  
CAGTAAGTTGGTTAACATGTTGGTTTTATTATCCATGTTATTATGGCAATGTATTACAA  
>HPV54\_Alpha\_9628437\_nt3981\_Genome\_Tile|1  
TGGTTTTTATTATCCATGTTATTATGGCAATGTATTACAACAGCATTTACTTTTTTTCTT  
>HPV54\_Alpha\_9628437\_nt4001\_Genome\_Tile|1  
ATTATGGCAATGTATTACAACAGCATTTACTTTTTTTCTTGTAGCCTTTATTCTATTGTG  
>HPV54\_Alpha\_9628437\_nt4021\_Genome\_Tile|1  
CAGCATTTACTTTTTTTCTTGTAGCCTTTATTCTATTGTGGGTACCTGCCCTGTGTGTTT  
>HPV54\_Alpha\_9628437\_nt4041\_Genome\_Tile|1

GTAGCCTTTATTCTATTGTGGGTACCTGCCCTGTGTGTTTATGTGCGCCTTGCCAGGCTT  
>HPV54\_Alpha\_9628437\_nt4061\_Genome\_Tile|1  
GGTACCTGCCCTGTGTGTTTATGTGCGCCTTGCCAGGCTTCTTGAACCTGACCTTCACTT  
>HPV54\_Alpha\_9628437\_nt4101\_Genome\_Tile|1  
CTTGAACCTGACCTTCACTTTACATAAGGTGTTACTGTGCACACCTACTGTGGATGCCCT  
>HPV54\_Alpha\_9628437\_nt4121\_Genome\_Tile|1  
TACATAAGGTGTTACTGTGCACACCTACTGTGGATGCCCTGTGTAACCTGCTTACCATAG  
>HPV54\_Alpha\_9628437\_nt4141\_Genome\_Tile|1  
ACACCTACTGTGGATGCCCTGTGTAACCTGCTTACCATAGTATAATAAATATTGTGTAGA  
>HPV54\_Alpha\_9628437\_nt4161\_Genome\_Tile|1  
GTGTAACCTGCTTACCATAGTATAATAAATATTGTGTAGATATATTTGTGTATTATGGCT  
>HPV54\_Alpha\_9628437\_nt4401\_Genome\_Tile|1  
AGTGGCACAGGGGGCCGCACAGGGTATATACCACTTGGACGACCCTCTACTACCCTTGAA  
>HPV54\_Alpha\_9628437\_nt4421\_Genome\_Tile|1  
AGGGTATATACCACTTGGACGACCCTCTACTACCCTTGAACCAGGTCCCTCCTGTACGTCC  
>HPV54\_Alpha\_9628437\_nt4461\_Genome\_Tile|1  
CCAGGTCCCTCCTGTACGTCCCGCAGGGGCTGTAGAAACAGTAGCACCCCTCTGACCCTTCC  
>HPV54\_Alpha\_9628437\_nt4521\_Genome\_Tile|1  
ATTGTGTCTTTAGTAGAGGAATCTAGTGTGTGGATGTTGGGGCACCAACCCCTACCATT  
>HPV54\_Alpha\_9628437\_nt4621\_Genome\_Tile|1  
CTACCCCTGCTATATTAGATGTCACCTCCACTACCACCCCTATTAGGGTGTCTATAACAT  
>HPV54\_Alpha\_9628437\_nt4641\_Genome\_Tile|1  
GTCACCTCCACTACCACCCCTATTAGGGTGTCTATAACATCCCATGATAATCCTATATAT  
>HPV54\_Alpha\_9628437\_nt4661\_Genome\_Tile|1  
TATTAGGGTGTCTATAACATCCCATGATAATCCTATATATACAGAGCCATCATTATTAGA  
>HPV54\_Alpha\_9628437\_nt4741\_Genome\_Tile|1  
TGGATGGTCGTGTTTTAGTATCTACCTCTACTTTGCAATCGTCCACTGCTGAAAATATAC  
>HPV54\_Alpha\_9628437\_nt4761\_Genome\_Tile|1  
TCTACCTCTACTTTGCAATCGTCCACTGCTGAAAATATACCTATGGACACTTTTATAATT  
>HPV54\_Alpha\_9628437\_nt4801\_Genome\_Tile|1  
CTATGGACACTTTTATAATTATGCAGGACCATATAGGCACAACAACCTAGCACACCTATAC  
>HPV54\_Alpha\_9628437\_nt4841\_Genome\_Tile|1  
AACAACCTAGCACACCTATACCAAGGCCGCTGCACGCCCACGCTTAGGTTTATATTCCTG  
>HPV54\_Alpha\_9628437\_nt4901\_Genome\_Tile|1  
TGCCTTACAGCAAGTGCCTGTACAGGACCTGCCTTTTTACAACAGCCTTCCAGTCTTAT  
>HPV54\_Alpha\_9628437\_nt5081\_Genome\_Tile|1  
ACTTACAACCTCGTAGGGGGGTTGTACGTTATAGTAGGGTGGGCGACAGGGGCCACATTACA  
>HPV54\_Alpha\_9628437\_nt5161\_Genome\_Tile|1  
TTAAACCTCGTGTGCATTTTTTTTTCAGGACTTAAGCCCTATTGCTCATGTCCCTGAGGAAA  
>HPV54\_Alpha\_9628437\_nt5181\_Genome\_Tile|1  
TTTCAGGACTTAAGCCCTATTGCTCATGTCCCTGAGGAAATAGAATTACACCCTTTAATA  
>HPV54\_Alpha\_9628437\_nt5221\_Genome\_Tile|1  
TAGAATTACACCCTTTAATATCTGCAAACAATACAAGCATTAACAATGGTCTTTACTCAG  
>HPV54\_Alpha\_9628437\_nt5281\_Genome\_Tile|1  
ATATATATGATGTATATGCTGACACAGATTTTGCTGACACTGGTGGTTTTCTCTTCTA  
>HPV54\_Alpha\_9628437\_nt5341\_Genome\_Tile|1  
CTGTTTCACATAGTTCTGTACAAACAGCCCTACAACTACATCTATACCATCTCAGTATG  
>HPV54\_Alpha\_9628437\_nt5381\_Genome\_Tile|1  
ATCTATACCATCTCAGTATGGTAACACCACAGTTCCCCTAACTGCCTCATCGCCATATAC  
>HPV54\_Alpha\_9628437\_nt5441\_Genome\_Tile|1  
ACCTATACCCACATCCTTTAGGCCCTCATCAGGTCACACCCCATTTGTTCCCGCACGTCC  
>HPV54\_Alpha\_9628437\_nt5501\_Genome\_Tile|1  
TATATTTCCACAAACACCCATTGCTGTTAATGGTGGGGATTTTTACCTGCATCCTAGTTA  
>HPV54\_Alpha\_9628437\_nt6221\_Genome\_Tile|1  
CTATGGATTTTAAAACCTACAAACCTCAAAAAGTGAGGTACCCCTTGATGTAGCTACCT

>HPV54\_Alpha\_9628437\_nt6241\_Genome\_Tile|1  
CAAACCTCAAAAAGTGAGGTACCCCTTGATGTAGCTACCTCAATTTGTAAATATCCTGAT  
>HPV54\_Alpha\_9628437\_nt6421\_Genome\_Tile|1  
GACTTATACATTAAGAAATCCTCAGGTAACCTTGACAGTTCTATTTATGCTGCAACTCCT  
>HPV54\_Alpha\_9628437\_nt6621\_Genome\_Tile|1  
AACATTGTGTGCTACAGCATCCACGCAGGATAGCTTTAATAATTCTGACTTTAGGGAGTA  
>HPV54\_Alpha\_9628437\_nt6801\_Genome\_Tile|1  
CTTTGGTATAACCCCCCAGCTACAAGTAGTTTGGAGGACACATATAGGTTTGTACAGTC  
>HPV54\_Alpha\_9628437\_nt6921\_Genome\_Tile|1  
TAAATTTAATTTTGGACTGTTGACCTTAAGGAACGATTTTCATCTGACCTTGACCAGTT  
>HPV54\_Alpha\_9628437\_nt7021\_Genome\_Tile|1  
GCACGTCCGCGCCTTCGGCCTGTAAAGCGTGCAGCCCCCTTCCTCCTCTAAGGGTACAGCG  
>HPV54\_Alpha\_9628437\_nt7101\_Genome\_Tile|1  
AAGGTAACAGTGTGTATGTTGTGTGTTGTATGTGTTGTTGTGTTTGTACCTTGTCTGTGT  
>HPV54\_Alpha\_9628437\_nt7181\_Genome\_Tile|1  
GTTATGTGTGGAATGTTTGTGTGTCTTATTTATGTTGTGACTCGTATGTTATATATGTTG  
>HPV54\_Alpha\_9628437\_nt7201\_Genome\_Tile|1  
GTGTCCTATTTATGTTGTGACTCGTATGTTATATATGTTGTATGTTTTCTGTATTATAT  
>HPV54\_Alpha\_9628437\_nt7281\_Genome\_Tile|1  
ACCCTATGAGTAACTTTTGTGTGATGTTGTTGCTACGTGCTTAGTAGCCTTTACCTTTT  
>HPV54\_Alpha\_9628437\_nt7301\_Genome\_Tile|1  
GTGATGTTGTTGCTACGTGCTTAGTAGCCTTTACCTTTTACCTTTGGTGTCCATTTTG  
>HPV54\_Alpha\_9628437\_nt7401\_Genome\_Tile|1  
CTGTTGGCACTAAAACTGTGTTTTAAAGCACTTTGTATCGTACATCTAATCTTTTGGGCGC  
>HPV54\_Alpha\_9628437\_nt7421\_Genome\_Tile|1  
TTTTAAGCACTTTGTATCGTACATCTAATCTTTTGGGCGCGCCACATCCTGCCCTGGTA  
>HPV54\_Alpha\_9628437\_nt7441\_Genome\_Tile|1  
ACATCTAATCTTTTGGGCGCGCCACATCCTGCCCTGGTAGTTTGGCAGCACATCTGCA  
>HPV54\_Alpha\_9628437\_nt7481\_Genome\_Tile|1  
GTTTTTGGCAGCACATCTGCACACCCACACATTTATAACTGTCAGAACAACCTTCACTTTCC  
>HPV54\_Alpha\_9628437\_nt7521\_Genome\_Tile|1  
TCAGAACAACCTTCACTTTCCATTGTGTAAAAACACGCCCTTTGCATTCCAACATTGATTT  
>HPV54\_Alpha\_9628437\_nt7541\_Genome\_Tile|1  
ATTGTGTAAAAACACGCCCTTTGCATTCCAACATTGATTTATATATTTTTTACATAATAA  
>HPV54\_Alpha\_9628437\_nt7601\_Genome\_Tile|1  
AACATGCTAGTAGGCACATATTTTAGCTGTGTAAACTTAGTAAGTGCATAGTTGGCAAAC  
>HPV54\_Alpha\_9628437\_nt7661\_Genome\_Tile|1  
TAAACATAGGTGTATGCCAGGTACGTGTCTGTACAACAGTGACTAATTCAGGAAACCGA  
>HPV53\_Alpha\_9627377\_nt0061\_Genome\_Tile|1  
CGGTACATATAAAAGCACTGTGTACAACACCCAGGACATCCATGGATCGTCAGTTATTTG  
>HPV53\_Alpha\_9627377\_nt0121\_Genome\_Tile|1  
AAAATACAGAAGAGCGACCACGTACATTGCACCAGCTATGTGAAGTTGTGAATAAACCAT  
>HPV53\_Alpha\_9627377\_nt0341\_Genome\_Tile|1  
AAGATATTACAATTGTTTCAGTGTACGGGGCTAGCCTGGAAGCACTAACTAAAAAAAGTT  
>HPV53\_Alpha\_9627377\_nt0561\_Genome\_Tile|1  
GTATAATCATGCACGGTAACGTACCAACACTTCCACAATATATTATAGAACTTATACCAC  
>HPV53\_Alpha\_9627377\_nt0941\_Genome\_Tile|1  
TTCACGTGGAGGCAATAGTAAAAAACGTACAGGGGATGTAATATCTGAAGATGAAACAG  
>HPV53\_Alpha\_9627377\_nt0961\_Genome\_Tile|1  
AAAAAACGTACAGGGGATGTAATATCTGAAGATGAAACAGACGAGGAAAGCACCGAATCT  
>HPV53\_Alpha\_9627377\_nt0981\_Genome\_Tile|1  
AATATCTGAAGATGAAACAGACGAGGAAAGCACCGAATCTGATTTGGATGGGTTTATAGA  
>HPV53\_Alpha\_9627377\_nt1001\_Genome\_Tile|1  
ACGAGGAAAGCACCGAATCTGATTTGGATGGGTTTATAGACAATAGTAATATAATATCTA  
>HPV53\_Alpha\_9627377\_nt1381\_Genome\_Tile|1

AGGAAGTGATATGGATGTGGATAGACAGGATATAATGCCACTGCAACAAATACAAGATAT  
>HPV53\_Alpha\_9627377\_nt1801\_Genome\_Tile|1  
GCATTATACTTTTATAAAACATCTATATCCAACATTAGTGACGTGTATGGGAGTACACCA  
>HPV53\_Alpha\_9627377\_nt2101\_Genome\_Tile|1  
CAACAGATGAATATGAAACAATGGATAAAGCATGTATGTAGCAAGGTGGATGATGGTGGG  
>HPV53\_Alpha\_9627377\_nt3181\_Genome\_Tile|1  
AGTGTCTTCTGCAGTAAGCTATGAGGGCATATATTATATACATGACGGCCATAAAACGTA  
>HPV53\_Alpha\_9627377\_nt3201\_Genome\_Tile|1  
ATGAGGGCATATATTATATACATGACGGCCATAAAACGTATTATACAAACTTTAAAGACG  
>HPV53\_Alpha\_9627377\_nt3541\_Genome\_Tile|1  
GTGTGTGCGCAAGGAACACAGACAACACAACAACACCAGAAAACACCTCCCTGGTGG  
>HPV53\_Alpha\_9627377\_nt3581\_Genome\_Tile|1  
AGAAAACACCTCCCTGGTGGAGCTTCGTGTAACAACCCGAAATCGACAGTGGTTATAAG  
>HPV53\_Alpha\_9627377\_nt3601\_Genome\_Tile|1  
AGCTTCGTGTAACAACCCGAAATCGACAGTGGTTATAAGACTGCACCTGTAGTACATAT  
>HPV53\_Alpha\_9627377\_nt3701\_Genome\_Tile|1  
TTTCAAAAACATAAACAACCTGTTTGTACTGTATCATCCACCTATCATTTGGACAAATGTA  
>HPV53\_Alpha\_9627377\_nt3721\_Genome\_Tile|1  
GTTTGTACTGTATCATCCACCTATCATTTGGACAAATGTAAACTGTGCTGTAAATAATAG  
>HPV53\_Alpha\_9627377\_nt3741\_Genome\_Tile|1  
CCTATCATTTGGACAAATGTAAACTGTGCTGTAAATAATAGTTATATTACTGTTGTATATA  
>HPV53\_Alpha\_9627377\_nt3761\_Genome\_Tile|1  
AACTGTGCTGTAAATAATAGTTATATTACTGTTGTATATAAAGATGAAACCCAACGCCAA  
>HPV53\_Alpha\_9627377\_nt3841\_Genome\_Tile|1  
AATACCCCTAGTGTATCACTGGTACTGGGACATATGACATGTGTTGATATGTAATGTTA  
>HPV53\_Alpha\_9627377\_nt3941\_Genome\_Tile|1  
CCTGGTATATACAATACTACACACGCCATATATGCTGCTAGGCCTGTAAACTTGCAACCA  
>HPV53\_Alpha\_9627377\_nt4121\_Genome\_Tile|1  
TATTTTGGTTTGTGTGGCATCATCCTACATAACCACATTTACACTATATATACTTTTTTT  
>HPV53\_Alpha\_9627377\_nt4141\_Genome\_Tile|1  
TCATCCTACATAACCACATTTACACTATATATACTTTTTTTTTTACTTCCCTTTATTATGT  
>HPV53\_Alpha\_9627377\_nt4161\_Genome\_Tile|1  
TACACTATATATACTTTTTTTTTTACTTCCCTTTATTATGTTTCTATAGCCATGCTGTGTG  
>HPV53\_Alpha\_9627377\_nt4521\_Genome\_Tile|1  
CTGTTGTTGATGTAACCCCTGCTCGGCCCCCTATTGTTGTAGAATCGGTAGGCCCCACTG  
>HPV53\_Alpha\_9627377\_nt4581\_Genome\_Tile|1  
ACCCTTCAATTGTTACATTGGTTGAAGAATCCAGTGTTATTGAGTCTGGAGCTTCGTTCC  
>HPV53\_Alpha\_9627377\_nt4721\_Genome\_Tile|1  
TCTACCTCTGTACATGTTAGTTCTACTACATATACTAATCCACATTTGTAGACCCTCCT  
>HPV53\_Alpha\_9627377\_nt4741\_Genome\_Tile|1  
TTCTACTACATATACTAATCCACATTTGTAGACCCTCCTGTTATTGAGGTCCCCCAAAC  
>HPV53\_Alpha\_9627377\_nt4941\_Genome\_Tile|1  
GTATAGCTGCCCCACGTTTATATAAAAAAGCCTTTCAACAGGTTAAGGTCACAGATCCTG  
>HPV53\_Alpha\_9627377\_nt4961\_Genome\_Tile|1  
TATAAAAAAGCCTTTCAACAGGTTAAGGTCACAGATCCTGCATTTCTTCACAAACCTGAA  
>HPV53\_Alpha\_9627377\_nt4981\_Genome\_Tile|1  
GGTTAAGGTCACAGATCCTGCATTTCTTCACAAACCTGAAACTTTAATTAATGTTGATAA  
>HPV53\_Alpha\_9627377\_nt5001\_Genome\_Tile|1  
CATTTCTTCACAAACCTGAAACTTTAATTAATGTTGATAATCCCATATTTCAAAATGCTG  
>HPV53\_Alpha\_9627377\_nt5421\_Genome\_Tile|1  
CTTTTAGTGGTAGTACCTCTAATGTTACAATACCCTTTGGTACATCTTGGGATGTTCCCA  
>HPV53\_Alpha\_9627377\_nt5461\_Genome\_Tile|1  
TACATCTTGGGATGTTCCCATCTATTCAGGTCCTGATGTAGTGTGCCCACAGGACCCCC  
>HPV53\_Alpha\_9627377\_nt5501\_Genome\_Tile|1  
GTGTTGCCCACAGGACCCCTACATGGCCTTATGCACCTCAATCTCCTTTTGATACCACC

>HPV53\_Alpha\_9627377\_nt5781\_Genome\_Tile|1  
CTTACCGTGGGACATCCTTATTACCCCATTTCTAAATCTGGTAAAGCAGACATCCCTAAG  
>HPV53\_Alpha\_9627377\_nt6161\_Genome\_Tile|1  
GGGTACGGCCTGTCGTTCCACACCTACTACAGCGGGCGACTGCCCCCATTTGGAACCTTAT  
>HPV53\_Alpha\_9627377\_nt6441\_Genome\_Tile|1  
GGCGTTATTGGTGAGGAAATACCTAATGACTTATATATTAAGGGTAGTAATGGCAGGGAC  
>HPV53\_Alpha\_9627377\_nt6461\_Genome\_Tile|1  
ACCTAATGACTTATATATTAAGGGTAGTAATGGCAGGGACCCGCCCCCTAGCTCTGTATA  
>HPV53\_Alpha\_9627377\_nt6821\_Genome\_Tile|1  
TACTATGAATTCTACCTTACTGGAAGACTGGAATATAGGTTTGTGCGCTCCTGTTGCCAC  
>HPV53\_Alpha\_9627377\_nt7081\_Genome\_Tile|1  
CTGTATCCTCTAAAAACGCTCTGCTTCTACTACATCTACCTCAGCCCCCTCCTCCAAGC  
>HPV53\_Alpha\_9627377\_nt7101\_Genome\_Tile|1  
TCTGCTTCTACTACATCTACCTCAGCCCCCTCCTCCAAGCGCAAACGCAAATAGTATGTT  
>HPV53\_Alpha\_9627377\_nt7141\_Genome\_Tile|1  
GCAAACGCAAATAGTATGTTGTGTGTCTGTATTGTGTATGTATGGTTGTATTATGTACTA  
>HPV53\_Alpha\_9627377\_nt7161\_Genome\_Tile|1  
GTGTGTCTGTATTGTGTATGTATGGTTGTATTATGTACTATTTATTTATTGTGTATACTG  
>HPV53\_Alpha\_9627377\_nt7181\_Genome\_Tile|1  
TATGGTTGTATTATGTACTATTTATTTATTGTGTATACTGTATGTGTGTATTTGTTGTCT  
>HPV53\_Alpha\_9627377\_nt7201\_Genome\_Tile|1  
TTTATTTATTGTGTATACTGTATGTGTGTATTTGTTGTCTGTGTGTATGACTGTATGTA  
>HPV53\_Alpha\_9627377\_nt7361\_Genome\_Tile|1  
CATGTTAGGTGGCGTCCCTGTTTATATACCAATCTCCACCCTGTATTATTAATATATGTA  
>HPV53\_Alpha\_9627377\_nt7381\_Genome\_Tile|1  
TTTATATACCAATCTCCACCCTGTATTATTAATATATGTACTGTTATCATGCAGTTACCT  
>HPV53\_Alpha\_9627377\_nt7401\_Genome\_Tile|1  
CTGTATTATTAATATATGTACTGTTATCATGCAGTTACCTATACCACATATAGTATAGCT  
>HPV53\_Alpha\_9627377\_nt7421\_Genome\_Tile|1  
CTGTTATCATGCAGTTACCTATACCACATATAGTATAGCTTATAGGTATCCATTTTAGTT  
>HPV53\_Alpha\_9627377\_nt7441\_Genome\_Tile|1  
ATACCACATATAGTATAGCTTATAGGTATCCATTTTAGTTTGGCGCCTTTTGGTACCCT  
>HPV53\_Alpha\_9627377\_nt7601\_Genome\_Tile|1  
GTTTAATGTTTTTTTGTGTTTATACACTATGCCTTACCTATTAGTCACTTACTGTAGGCTG  
>HPV26\_Alpha\_9627305\_nt0061\_Genome\_Tile|1  
TATAAAAGTAAAAGGCTAGCTACGTGCAAAACAGCTATGTTTCGAGGATCCTAGAGAACGA  
>HPV26\_Alpha\_9627305\_nt0201\_Genome\_Tile|1  
AACCTTACAATGGGCTGATGTATATAATTTTGCAATTTGTGACCTAAGAGTAGTATATAG  
>HPV26\_Alpha\_9627305\_nt0241\_Genome\_Tile|1  
GACCTAAGAGTAGTATATAGAGATAGGAGTCCGTATGCTGCATGCAAAAAGATGTGTAATA  
>HPV26\_Alpha\_9627305\_nt0261\_Genome\_Tile|1  
AGATAGGAGTCCGTATGCTGCATGCAAAAAGATGTGTAATATTTTATTCAAAAATAACAGA  
>HPV26\_Alpha\_9627305\_nt0281\_Genome\_Tile|1  
CATGCAAAAAGATGTGTAATATTTTATTCAAAAATAACAGAGTATAGACGCTATACATGTT  
>HPV26\_Alpha\_9627305\_nt0541\_Genome\_Tile|1  
CAAGTGTAAGAACAATGCATGGAAACATAATTAATATTGAAGATGTAATACTAGATCTG  
>HPV26\_Alpha\_9627305\_nt1161\_Genome\_Tile|1  
TGCAAGACATAACAAATCAACACAGACAGCAAAGCGACAGTCAGCAGAATACACACCAAG  
>HPV26\_Alpha\_9627305\_nt1181\_Genome\_Tile|1  
CACAGACAGCAAAGCGACAGTCAGCAGAATACACACCAAGTAAATAATTCACAGGCCAAA  
>HPV26\_Alpha\_9627305\_nt1341\_Genome\_Tile|1  
GGTTGCCTAGTGTGTGTAGTCAGGGGGGGTCAAATGCCTCAGTGGAAGATATCGATGTAG  
>HPV26\_Alpha\_9627305\_nt1381\_Genome\_Tile|1  
AGTGGAAGATATCGATGTAGACACACATGTAAACAGTGTTACACAAAATATGTGAATTATT  
>HPV26\_Alpha\_9627305\_nt2101\_Genome\_Tile|1

ATCTATGTGTATGTCACAATGGCTACAATATAGATGTTCTAAAATAGAAGAGGGCGGGTC  
>HPV26\_Alpha\_9627305\_nt2121\_Genome\_Tile|1  
GGCTACAATATAGATGTTCTAAAATAGAAGAGGGCGGGTCGTGGAAGGAAATTGCCAAAT  
>HPV26\_Alpha\_9627305\_nt2141\_Genome\_Tile|1  
AAAATAGAAGAGGGCGGGTCGTGGAAGGAAATTGCCAAATTTTTAAGGTTTCAACATGTA  
>HPV26\_Alpha\_9627305\_nt2941\_Genome\_Tile|1  
CATGGCAGGCAATTGAAATACATATAGCATTCAGTCGTTAATAAACACGGACTATAATA  
>HPV26\_Alpha\_9627305\_nt2961\_Genome\_Tile|1  
CATATAGCATTCAGTCGTTAATAAACACGGACTATAATACAGAAGCTTGGACAATGCGA  
>HPV26\_Alpha\_9627305\_nt3141\_Genome\_Tile|1  
TATGTGTATTATAAACTGATATAGGGTGGTGTAAGGTACTGGAGATGTTGATGCAAAA  
>HPV26\_Alpha\_9627305\_nt3181\_Genome\_Tile|1  
CTGGAGATGTTGATGCAAAAGGGATATATTATACACAAGGGGCATATAAGCAGTATTACG  
>HPV26\_Alpha\_9627305\_nt3401\_Genome\_Tile|1  
CCAGACCACCGAAGCCTACGTGCCCCGTGGGCACCAAGGAAACCGAGGCGCCATACCCAGG  
>HPV26\_Alpha\_9627305\_nt3541\_Genome\_Tile|1  
AGTCAGTGGACTATACAAACAACAACCTACACAGTACAAGTGGAGGCCATCACCCGGGAA  
>HPV26\_Alpha\_9627305\_nt3741\_Genome\_Tile|1  
GATACCAATCAACAAGGCATTGTAACAATTACCTTTAACAGTATAACACAACGTAATAAT  
>HPV26\_Alpha\_9627305\_nt3841\_Genome\_Tile|1  
CATTGGGAATAATGTCATTGTAATATAGTGATATTTTTACCAACACAAGCCAATATGT  
>HPV26\_Alpha\_9627305\_nt4001\_Genome\_Tile|1  
ACTTTTGCTTTCCATTTATGTGTTTGCAGCCTCGCTATTATTAGTGTTTTGTTTTGGTT  
>HPV26\_Alpha\_9627305\_nt4041\_Genome\_Tile|1  
TTAGTGTTTTGTTTTGTTTTGTTGTTATCTACATCATATATAACTACCTATATTGTGTAT  
>HPV26\_Alpha\_9627305\_nt4061\_Genome\_Tile|1  
TGTGGTATCTACATCATATATAACTACCTATATTGTGTATATTTGCTTATTTTTTATACC  
>HPV26\_Alpha\_9627305\_nt4081\_Genome\_Tile|1  
TAACTACCTATATTGTGTATATTTGCTTATTTTTTATACCTGCTTGTTTTTACATTTTT  
>HPV26\_Alpha\_9627305\_nt4101\_Genome\_Tile|1  
ATTTGCTTATTTTTTATACCTGCTTGTTTTTACATTTTTTATACTGTAATGGTAATTGCT  
>HPV26\_Alpha\_9627305\_nt4121\_Genome\_Tile|1  
TGCTTGTTTTTTACATTTTTTATACTGTAATGGTAATTGCTACTTAGTCCCTTTAATAAAC  
>HPV26\_Alpha\_9627305\_nt4141\_Genome\_Tile|1  
ATACTGTAATGGTAATTGCTACTTAGTCCCTTTAATAAACGTGTTACAATGGTAGCTGTC  
>HPV26\_Alpha\_9627305\_nt4641\_Genome\_Tile|1  
ACATGTAACAAGTACCAATATACAAAATCCATTATATATTGAACCCCCCTATAGATATACC  
>HPV26\_Alpha\_9627305\_nt4681\_Genome\_Tile|1  
GAACCCCCCTATAGATATACCACAGGCCGGGGAAGCATCAGGTCATATATTTACTACAACG  
>HPV26\_Alpha\_9627305\_nt4701\_Genome\_Tile|1  
ACAGGCCGGGAAGCATCAGGTCATATATTTACTACAACGTCCACAGCTGGCACACATAG  
>HPV26\_Alpha\_9627305\_nt4721\_Genome\_Tile|1  
GTCATATATTTACTACAACGTCCACAGCTGGCACACATAGTTATGAAGAAATTCCAATGG  
>HPV26\_Alpha\_9627305\_nt4841\_Genome\_Tile|1  
GTATACAACGAGTGTGAGCTCCTCGTTTGTATAGTAAGGCCTATCAACAGGTAAAGGTTA  
>HPV26\_Alpha\_9627305\_nt4941\_Genome\_Tile|1  
CTTTGATAATCCTGCATATGAACCTATAGATGAAACACTTACATATGCTTCCAGTAGTAC  
>HPV26\_Alpha\_9627305\_nt4961\_Genome\_Tile|1  
AACCTATAGATGAAACACTTACATATGCTTCCAGTAGTACTGTAGCACCTGACCCCGATT  
>HPV26\_Alpha\_9627305\_nt5161\_Genome\_Tile|1  
ATTAGTCCTATACAGTCTTTTGCTGAACACGAAGAAATTGAATTGCAGCCTTTACATACA  
>HPV26\_Alpha\_9627305\_nt5181\_Genome\_Tile|1  
TGCTGAACACGAAGAAATTGAATTGCAGCCTTTACATACATCTACCCATTCATCTGCACC  
>HPV26\_Alpha\_9627305\_nt5201\_Genome\_Tile|1  
AATTGCAGCCTTTACATACATCTACCCATTCATCTGCACCTTTGTTTGATATATATGCAG

>HPV26\_Alpha\_9627305\_nt5221\_Genome\_Tile|1  
TCTACCCATTTCATCTGCACCTTTGTTTGATATATATGCAGACCCTGATACAGTTCCTAGC  
>HPV26\_Alpha\_9627305\_nt5261\_Genome\_Tile|1  
ACCCTGATACAGTTCCTAGCATACATACGCCGCGCATGTCATATTCCTTACAACATTAC  
>HPV26\_Alpha\_9627305\_nt5281\_Genome\_Tile|1  
ATACATACGCCGCGCATGTCATATTCCTTACAACATTACCAGTTCCAAGATATGCCTCC  
>HPV26\_Alpha\_9627305\_nt5301\_Genome\_Tile|1  
ATATTCCTTACAACATTACCAGTTCCAAGATATGCCTCCAATGTGTTTTCTCTATTAA  
>HPV26\_Alpha\_9627305\_nt5321\_Genome\_Tile|1  
CAGTTCCAAGATATGCCTCCAATGTGTTTTCTCTATTAATACTTCCACTACCAATGTTA  
>HPV26\_Alpha\_9627305\_nt5361\_Genome\_Tile|1  
TACTTCCACTACCAATGTTACTGTGCCTTTATCCACCTCATTTGAACTACCTGTATATAG  
>HPV26\_Alpha\_9627305\_nt5381\_Genome\_Tile|1  
CTGTGCCTTTATCCACCTCATTTGAACTACCTGTATATAGTGGGTCAGACATTTACACGC  
>HPV26\_Alpha\_9627305\_nt5401\_Genome\_Tile|1  
TTTGAACCTACCTGTATATAGTGGGTCAGACATTTACACGCCACATCTTCCCGACATGG  
>HPV26\_Alpha\_9627305\_nt5461\_Genome\_Tile|1  
CCATCATTTGCCCCCCCCACCCACCACTAACTTACCTGCAATAGTTGTGCATGGGGATAAT  
>HPV26\_Alpha\_9627305\_nt5701\_Genome\_Tile|1  
CAGCTCTCGTTTATTAACATTAGGACATCCATATTTTTTCATACCTAAACTGGCCAAAA  
>HPV26\_Alpha\_9627305\_nt5941\_Genome\_Tile|1  
ACATCCTTTGTTTAAATAAGTTGGATGATACCGAAAACCTCTCATTTGGCTACTGTAAATGC  
>HPV26\_Alpha\_9627305\_nt5961\_Genome\_Tile|1  
TGGATGATACCGAAAACCTCTCATTTGGCTACTGTAAATGCAGACACTGACAACAGGGACA  
>HPV26\_Alpha\_9627305\_nt5981\_Genome\_Tile|1  
CATTTGGCTACTGTAAATGCAGACACTGACAACAGGGACAATGTTTCAGTTGATAATAAA  
>HPV26\_Alpha\_9627305\_nt6061\_Genome\_Tile|1  
AGGTTGTACACCGCCCTTGGGAGAGCACTGGGGTATTGGCACTATATGTAAAAATACACA  
>HPV26\_Alpha\_9627305\_nt6101\_Genome\_Tile|1  
ACTATATGTAAAAATACACAGACACAACGTGGGGATTGCCCCCCTTAGAATTAATTTCC  
>HPV26\_Alpha\_9627305\_nt6361\_Genome\_Tile|1  
TTTTTATAATAAGGCGGGGGCTGTTGGGGATGCTATACCCACCACCTTTGTATATTAAAGG  
>HPV26\_Alpha\_9627305\_nt6381\_Genome\_Tile|1  
CTGTTGGGGATGCTATACCCACCACCTTTGTATATTAAAGGTGCTGAATCAGGCAGGGAGC  
>HPV26\_Alpha\_9627305\_nt6401\_Genome\_Tile|1  
ACCACCTTTGTATATTAAAGGTGCTGAATCAGGCAGGGAGCCCCCTACATCTTCTATTTAT  
>HPV26\_Alpha\_9627305\_nt6721\_Genome\_Tile|1  
GTTGTGTAAAAATAACACTTACAACAGATGTTATGGCTTACATACATTTAATGAATGCCTC  
>HPV26\_Alpha\_9627305\_nt6981\_Genome\_Tile|1  
TAGGGCGTAAGTTTATGTTACAGGCCGGCATACAACGGCGGCCGAAACTAGGCACCAAAC  
>HPV26\_Alpha\_9627305\_nt7001\_Genome\_Tile|1  
CAGGCCGGCATACAACGGCGGCCGAAACTAGGCACCAAACGTCCCTTATCTTCTACCTCT  
>HPV26\_Alpha\_9627305\_nt7121\_Genome\_Tile|1  
TATATGTTTGTGGTATGTTATGTAAGGTGTGTTTGTATGTGTGTACAACGTATGTAATG  
>HPV26\_Alpha\_9627305\_nt7201\_Genome\_Tile|1  
ATGTATTATATGTATGCATGGTTATGTGTTTCCCTGTTTGTATGCATACTTGTATTATA  
>HPV26\_Alpha\_9627305\_nt7221\_Genome\_Tile|1  
GTTATGTGTTTTCCTGTTTGTATGCATACTTGTATTATAAAGTATGAATGTGTCTTC  
>HPV26\_Alpha\_9627305\_nt7241\_Genome\_Tile|1  
TATGCATACTTGTATTATAAAGTATGAATGTGTCTTCATGCATGGTTACATGTCTTT  
>HPV26\_Alpha\_9627305\_nt7261\_Genome\_Tile|1  
TAAAGTATGAATGTGTCTTCATGCATGGTTACATGTCTTTACTACACTATTTGTCAATTTG  
>HPV26\_Alpha\_9627305\_nt7281\_Genome\_Tile|1  
ATGCATGGTTACATGTCTTTACTACACTATTTGTCAATTTGTTTTACCCCTGAGGTAATGG  
>HPV26\_Alpha\_9627305\_nt7301\_Genome\_Tile|1

ACTACACTATTTGTCATTTGTTTTACCCCTGAGGTAATGGGAGGAACCTTAGGTGGTGTGTC  
>HPV26\_Alpha\_9627305\_nt7321\_Genome\_Tile|1  
TTTTACCCCTGAGGTAATGGGAGGAACCTTAGGTGGTGTCCCTTATAATTATTATATTAC  
>HPV26\_Alpha\_9627305\_nt7361\_Genome\_Tile|1  
CCTTATAATTATTATATTACACAAGTTTACCTTTTATATGTATTTCACTAAACTTTTGTA  
>HPV26\_Alpha\_9627305\_nt7381\_Genome\_Tile|1  
ACAAGTTTACCTTTTATATGTATTTCACTAAACTTTTGTAGTGTTATATTTTACTTTTT  
>HPV26\_Alpha\_9627305\_nt7621\_Genome\_Tile|1  
ATATTTAAACAATACTTACATAAGCACTTTTCTTACATTATAATAAAACTGCTGTTAGG  
>HPV88\_Gamma\_167600365\_nt0001\_Genome\_Tile|1  
ATAGTTGGCAACAATCACCTCTGCAGAAAAATATAACCGGCAGTGGTACTGCAGATTAT  
>HPV88\_Gamma\_167600365\_nt0021\_Genome\_Tile|1  
CTGCAGAAAAATATAACCGGCAGTGGTACTGCAGATTATTATTTTTTGCCGAAGTATGC  
>HPV88\_Gamma\_167600365\_nt0041\_Genome\_Tile|1  
GCAGTGGTACTGCAGATTATTATTTTTTGCCGAAGTATGCAGATGGAGGATTCTTATCTA  
>HPV88\_Gamma\_167600365\_nt0061\_Genome\_Tile|1  
TATTTTTTGCCGAAGTATGCAGATGGAGGATTCTTATCTACCAAACGGCTAGATGACTT  
>HPV88\_Gamma\_167600365\_nt0081\_Genome\_Tile|1  
AGATGGAGGATTCTTATCTACCAAACGGCTAGATGACTTCTGTTGATTTTTAATATTT  
>HPV88\_Gamma\_167600365\_nt0101\_Genome\_Tile|1  
CCAAAACGGCTAGATGACTTCTGTTTCGATTTTTAATATTTCTCTTTTGGATGTGCATCTT  
>HPV88\_Gamma\_167600365\_nt0141\_Genome\_Tile|1  
CTCTTTTTGATGTGCATCTTCCTTGCATATTTTGTGGCTATATTTGGACCTACAGCAGT  
>HPV88\_Gamma\_167600365\_nt0161\_Genome\_Tile|1  
CCTTGCATATTTTGTGGCTATATTTTGGACCTACAGCAGTTGGGTTCGTTCTATCAGAAA  
>HPV88\_Gamma\_167600365\_nt0181\_Genome\_Tile|1  
TATTTTGGACCTACAGCAGTTGGGTTCGTTCTATCAGAAACAGCTTAGTTTGGTCTGGAG  
>HPV88\_Gamma\_167600365\_nt0201\_Genome\_Tile|1  
TGGGTTCGTTCTATCAGAAACAGCTTAGTTTGGTCTGGAGGAGCGGTGCTTGTGTTTGCCT  
>HPV88\_Gamma\_167600365\_nt0221\_Genome\_Tile|1  
CAGCTTAGTTTGGTCTGGAGGAGCGGTGCTTGTGTTTGCCTGTTGTGTCCCTTGTCTAGG  
>HPV88\_Gamma\_167600365\_nt0241\_Genome\_Tile|1  
GAGCGGTGCTTGTGTTTGCCTGTTGTGTCCCTTGTCTAGGCTTTCTGCTAGGTATGAGGC  
>HPV88\_Gamma\_167600365\_nt0281\_Genome\_Tile|1  
CTTTCTGCTAGGTATGAGGCTGAACGCTTTTACCGCTGCTCTGTAAAGGGAATTCATTTT  
>HPV88\_Gamma\_167600365\_nt0301\_Genome\_Tile|1  
TGAACGCTTTTACCGCTGCTCTGTAAAGGGAATTCATTTTGGAGGATTTCCCTAAGAAAGAA  
>HPV88\_Gamma\_167600365\_nt0321\_Genome\_Tile|1  
CTGTAAAGGGAATTCATTTTGGAGATTTCCCTAAGAAAGAATCTAGCTGATGTGGTATGCC  
>HPV88\_Gamma\_167600365\_nt0341\_Genome\_Tile|1  
GAGGATTTCCCTAAGAAAGAATCTAGCTGATGTGGTATGCCGATGCTATGAATGTATGTCA  
>HPV88\_Gamma\_167600365\_nt0361\_Genome\_Tile|1  
TCTAGCTGATGTGGTATGCCGATGCTATGAATGTATGTCATTGCTTGATTTACCTGAAAA  
>HPV88\_Gamma\_167600365\_nt0381\_Genome\_Tile|1  
GATGCTATGAATGTATGTCATTGCTTGATTTACCTGAAAAATTAGATTGTATCTTTAGGG  
>HPV88\_Gamma\_167600365\_nt0401\_Genome\_Tile|1  
TTGCTTGATTTACCTGAAAAATTAGATTGTATCTTTAGGGGTGAGTGTTCATCTTGTG  
>HPV88\_Gamma\_167600365\_nt0421\_Genome\_Tile|1  
ATTAGATTGTATCTTTAGGGGTGAGTGTTCATCTTGTGAGAAACACTTGGAGGGGAAC  
>HPV88\_Gamma\_167600365\_nt0441\_Genome\_Tile|1  
GTGAGTGTTCATCTTGTGAGAAACACTTGGAGGGGAACGTGCAGAAATTGTTGTAGAA  
>HPV88\_Gamma\_167600365\_nt0461\_Genome\_Tile|1  
AGAAACACTTGGAGGGGAACGTGCAGAAATTGTTGTAGAAATGATTGGGAAGGAGCCCT  
>HPV88\_Gamma\_167600365\_nt0481\_Genome\_Tile|1  
GTGCAGAAATTGTTGTAGAAATGATTGGGAAGGAGCCCTCAATTAATGATCTAGAAATA



>HPV88\_Gamma\_167600365\_nt0501\_Genome\_Tile|1  
AATGATTGGGAAGGAGCCCTCAATTAATGATCTAGAAATAAAGCTGGAAGAACATGTATT  
>HPV88\_Gamma\_167600365\_nt0521\_Genome\_Tile|1  
CAATTAATGATCTAGAAATAAAGCTGGAAGAACATGTATTGCCTGCTAACCTTTTAAGCA  
>HPV88\_Gamma\_167600365\_nt0541\_Genome\_Tile|1  
AAGCTGGAAGAACATGTATTGCCTGCTAACCTTTTAAGCAACGAGGTTTTGTCATCTGAT  
>HPV88\_Gamma\_167600365\_nt0621\_Genome\_Tile|1  
GGAGCGAGAACCTTTCCAAATAGATACCAGTTGCGCCTTCTGTGAAGCAGGTGTAAGGGT  
>HPV88\_Gamma\_167600365\_nt0641\_Genome\_Tile|1  
TAGATACCAGTTGCGCCTTCTGTGAAGCAGGTGTAAGGGTATTTGTTCTAGCTTCACCAG  
>HPV88\_Gamma\_167600365\_nt0661\_Genome\_Tile|1  
TGTGAAGCAGGTGTAAGGGTATTTGTTCTAGCTTCACCAGCCGGAATTCGCACGCTTCAG  
>HPV88\_Gamma\_167600365\_nt0701\_Genome\_Tile|1  
CCGGAATTCGCACGCTTCAGCAGCTTTTACTTGCAGAGATTTCCATAAGTTGCCCTGGGT  
>HPV88\_Gamma\_167600365\_nt0721\_Genome\_Tile|1  
CAGCTTTTACTTGCAGAGATTTCCATAAGTTGCCCTGGGTGTTCCAGGAACAACCTTCGA  
>HPV88\_Gamma\_167600365\_nt0761\_Genome\_Tile|1  
GTTCCAGGAACAACCTTTCGACATGGCAGACCCCAATAAAGGTACTGATACTACTGATAAT  
>HPV88\_Gamma\_167600365\_nt0821\_Genome\_Tile|1  
TTTGACTGTAATTCTGAATGGTTACTTGTAGATGAAGCAGAATGTGTAGACGATTTAGAT  
>HPV88\_Gamma\_167600365\_nt0841\_Genome\_Tile|1  
GTTACTTGTAGATGAAGCAGAATGTGTAGACGATTTAGATGTACTTGATGAATTGTTAGA  
>HPV88\_Gamma\_167600365\_nt0861\_Genome\_Tile|1  
AATGTGTAGACGATTTAGATGTACTTGATGAATTGTTAGAAGAAAGTACGCAATGTTCAA  
>HPV88\_Gamma\_167600365\_nt0881\_Genome\_Tile|1  
GTACTTGATGAATTGTTAGAAGAAAGTACGCAATGTTCAACGGTTTCAAACCTTGATTGAT  
>HPV88\_Gamma\_167600365\_nt0901\_Genome\_Tile|1  
AGAAAGTACGCAATGTTCAACGGTTTCAAACCTTGATTGATGATGACCCAGTTGATATTGA  
>HPV88\_Gamma\_167600365\_nt0941\_Genome\_Tile|1  
GATGACCCAGTTGATATTGAGGATCAGGGAAATTCCCTGGCCTTATTCAACAGTCAGGTA  
>HPV88\_Gamma\_167600365\_nt0981\_Genome\_Tile|1  
CCTTATTCAACAGTCAGGTAACAGAGGATTGTAACACAGCTATAAGCGCCCTAAAACGAA  
>HPV88\_Gamma\_167600365\_nt1041\_Genome\_Tile|1  
AGTTAATCAAAAAGTCCGCAGCTGCAGACTGTTGCTGAGTTGAGTCCAAGGCTTCAAGCAG  
>HPV88\_Gamma\_167600365\_nt1141\_Genome\_Tile|1  
CGATGACAGTGGCATAGGAGAAGATGAAGCTCAAATACTTCTCAGGTAGCGTTGGACTC  
>HPV88\_Gamma\_167600365\_nt1161\_Genome\_Tile|1  
AAGATGAAGCTCAAATACTTCTCAGGTAGCGTTGGACTCCTTAGAAAAGCTCCTTAGAGA  
>HPV88\_Gamma\_167600365\_nt1181\_Genome\_Tile|1  
TCTCAGGTAGCGTTGGACTCCTTAGAAAAGCTCCTTAGAGACATCGGGAGCTGGGCTAACT  
>HPV88\_Gamma\_167600365\_nt1221\_Genome\_Tile|1  
CATCGGGAGCTGGGCTAACTATTAACCTTTTACATTGCAGCAACCGACAGGCAACCGTCC  
>HPV88\_Gamma\_167600365\_nt1241\_Genome\_Tile|1  
ATTAACCTTTTACATTGCAGCAACCGACAGGCAACCGTCCATCTAAAAATTAAAGAACTC  
>HPV88\_Gamma\_167600365\_nt1261\_Genome\_Tile|1  
CAACCGACAGGCAACCGTCCATCTAAAAATTAAAGAACTCTATGGTGTATCATTTAAAGA  
>HPV88\_Gamma\_167600365\_nt1281\_Genome\_Tile|1  
ATCTAAAAATTAAAGAACTCTATGGTGTATCATTTAAAGAACTAACTAGAAATTTTAAAA  
>HPV88\_Gamma\_167600365\_nt1301\_Genome\_Tile|1  
TATGGTGTATCATTTAAAGAACTAACTAGAAATTTTAAAGTGATAAGTCTTGTTCGAAT  
>HPV88\_Gamma\_167600365\_nt1341\_Genome\_Tile|1  
GTGATAAGTCTTGTTCGAATAGCTGGGTAATTGCTGTGTATAATGCTGTAGAAGAAGTTC  
>HPV88\_Gamma\_167600365\_nt1381\_Genome\_Tile|1  
TAATGCTGTAGAAGAAGTTCTGGAGGCATCAAAGGTGCAGCTTCAGAAGCATGTAGAGTT  
>HPV88\_Gamma\_167600365\_nt1401\_Genome\_Tile|1

TGGAGGCATCAAAGGTGCAGCTTCAGAAGCATGTAGAGTTCTTACAGTTAATAGTGTATG  
>HPV88\_Gamma\_167600365\_nt1421\_Genome\_Tile|1  
CTTCAGAAGCATGTAGAGTTCTTACAGTTAATAGTGTATGGATTTTCATGGGTTGTATCTA  
>HPV88\_Gamma\_167600365\_nt1441\_Genome\_Tile|1  
CTTACAGTTAATAGTGTATGGATTTTCATGGGTTGTATCTAATTGTATTTAAAAGCACTAA  
>HPV88\_Gamma\_167600365\_nt1461\_Genome\_Tile|1  
GATTTTCATGGGTTGTATCTAATTGTATTTAAAAGCACTAAAAATAGAGATACTGTATCTA  
>HPV88\_Gamma\_167600365\_nt1481\_Genome\_Tile|1  
ATTGTATTTAAAAGCACTAAAAATAGAGATACTGTATCTAAATTGTTTACGGAAATGTTA  
>HPV88\_Gamma\_167600365\_nt1501\_Genome\_Tile|1  
AAATAGAGATACTGTATCTAAATTGTTTACGGAAATGTTAAATGTTAATGCTTTACAATT  
>HPV88\_Gamma\_167600365\_nt1581\_Genome\_Tile|1  
CAAGAAGTGTCCGGTAGCGTTATTTTTTTATAGAAAAAGTTTGGGAAATGCTTCTTTTA  
>HPV88\_Gamma\_167600365\_nt1601\_Genome\_Tile|1  
TTATTTTTTTATAGAAAAAGTTTGGGAAATGCTTCTTTTATGTATGGAGAAGTTCCAGAT  
>HPV88\_Gamma\_167600365\_nt1621\_Genome\_Tile|1  
TTTGGGAAATGCTTCTTTTATGTATGGAGAAGTTCCAGATTGGATTAAAAAACAAACCTT  
>HPV88\_Gamma\_167600365\_nt1661\_Genome\_Tile|1  
TGGATTAAAAAACAAACCTTGGTAGAGCATCAGTCTGCGTCAGCAGCAGAGACATTTGAT  
>HPV88\_Gamma\_167600365\_nt1681\_Genome\_Tile|1  
GGTAGAGCATCAGTCTGCGTCAGCAGCAGAGACATTTGATTTTAGCTCTATGGTTCAATG  
>HPV88\_Gamma\_167600365\_nt1861\_Genome\_Tile|1  
AGATTGTGCCGCAATGGTAAAAATGTATAGAAGGTATGAATTGAGACAAATGTCAATGGC  
>HPV88\_Gamma\_167600365\_nt1901\_Genome\_Tile|1  
TTGAGACAAATGTCAATGGCTGAATGGATAGATAAATGTTGTTCAAAATGTACCGAAAAAT  
>HPV88\_Gamma\_167600365\_nt1921\_Genome\_Tile|1  
TGAATGGATAGATAAATGTTGTTCAAAATGTACCGAAAAATGGTAACTGGAAAATAATTGC  
>HPV88\_Gamma\_167600365\_nt1961\_Genome\_Tile|1  
GGTAACTGGAAAATAATTGCTACATTTCTGAAACATCAGAATGTACAATTTTATCATTT  
>HPV88\_Gamma\_167600365\_nt1981\_Genome\_Tile|1  
TACATTTCTGAAACATCAGAATGTACAATTTTATCATTTCTCATTGCATTGAAACCTTT  
>HPV88\_Gamma\_167600365\_nt2021\_Genome\_Tile|1  
CTCATTGCATTGAAACCTTTCTTACAGGGTGTTCCAAAGAAGAATTGTCTGGTGTGTTGTT  
>HPV88\_Gamma\_167600365\_nt2061\_Genome\_Tile|1  
AGAATTGTCTGGTGTGTTGTTGGGCCCCCTGACACTGGGAAATCATATTTCTGCTTCTCAT  
>HPV88\_Gamma\_167600365\_nt2101\_Genome\_Tile|1  
ATCATATTTCTGCTTCTCATTAATACGTTTTTTTTGGGGGAAAAGTTGTGTCCTTTATGAA  
>HPV88\_Gamma\_167600365\_nt2141\_Genome\_Tile|1  
AAAGTTGTGTCCTTTATGAATAGAAATAGTCATTTCTGGTTACAACCATTGCAAGATACT  
>HPV88\_Gamma\_167600365\_nt2241\_Genome\_Tile|1  
TGTATATGGATATTAACCTTCGGAATGGACTAGATGGTAATCTTGATCTCTTGATGCAA  
>HPV88\_Gamma\_167600365\_nt2321\_Genome\_Tile|1  
ATGAAATTACCTCCTTTACTTGTTACCACTAACGTGGATGTAATGGAGGATCAATCCTTA  
>HPV88\_Gamma\_167600365\_nt2341\_Genome\_Tile|1  
TGTTACCACTAACGTGGATGTAATGGAGGATCAATCCTTAAGATATCTGCATAGTAGACT  
>HPV88\_Gamma\_167600365\_nt2361\_Genome\_Tile|1  
TAATGGAGGATCAATCCTTAAGATATCTGCATAGTAGACTAGTATGTTTTAAATTCCCTA  
>HPV88\_Gamma\_167600365\_nt2381\_Genome\_Tile|1  
AGATATCTGCATAGTAGTATGTTTTAAATTCCTTAACAAATTACCACTGAATGAC  
>HPV88\_Gamma\_167600365\_nt2401\_Genome\_Tile|1  
AGTATGTTTTAAATTCCCTAACAAATTACCACTGAATGACGATGGCTCCCTTGTATATGA  
>HPV88\_Gamma\_167600365\_nt2421\_Genome\_Tile|1  
ACAAATTACCACTGAATGACGATGGCTCCCTTGTATATGAAATAACGAATGATACATGGG  
>HPV88\_Gamma\_167600365\_nt2441\_Genome\_Tile|1  
GATGGCTCCCTTGTATATGAAATAACGAATGATACATGGGCCTGTTTTTTTAGAAAAATT

>HPV88\_Gamma\_167600365\_nt2461\_Genome\_Tile|1  
AATAACGAATGATACATGGGCCTGTTTTTTTAGAAAATTTGCTACCCAGTTAAACCTGGT  
>HPV88\_Gamma\_167600365\_nt2561\_Genome\_Tile|1  
AGAACGTTTCGTTGCACTGCAAGATGCCATATTGAATCTAATTGAAAGGGGAGAACTGA  
>HPV88\_Gamma\_167600365\_nt2581\_Genome\_Tile|1  
AAGATGCCATATTGAATCTAATTGAAAGGGGAGAACTGATTTAAGATCCCAAATACAAT  
>HPV88\_Gamma\_167600365\_nt2601\_Genome\_Tile|1  
ATTGAAAGGGGAGAACTGATTTAAGATCCCAAATACAATATTGGGAGCTGGTTAGAAAA  
>HPV88\_Gamma\_167600365\_nt2641\_Genome\_Tile|1  
ATTGGGAGCTGGTTAGAAAAGAGCAGGTGATCCTTTATTATGCTAGAAAAGAGTGGCTATA  
>HPV88\_Gamma\_167600365\_nt2681\_Genome\_Tile|1  
TGCTAGAAAAGAGTGGCTATAATAGACTTGGCCTGCAGCCTACTCCAGCACCAGCGGTTTC  
>HPV88\_Gamma\_167600365\_nt2701\_Genome\_Tile|1  
ATAGACTTGGCCTGCAGCCTACTCCAGCACCAGCGGTTTCAGAATACAATGCTAAACAAG  
>HPV88\_Gamma\_167600365\_nt2741\_Genome\_Tile|1  
AGAATACAATGCTAAACAAGCTATCCATCTCCAGCTTATGTTAAAATCCCTTGAAAAATC  
>HPV88\_Gamma\_167600365\_nt2761\_Genome\_Tile|1  
CTATCCATCTCCAGCTTATGTTAAAATCCCTTGAAAAATCAAAATTTGCAAAAAGAGCCAT  
>HPV88\_Gamma\_167600365\_nt2781\_Genome\_Tile|1  
TTAAAATCCCTTGAAAAATCAAAATTTGCAAAAAGAGCCATGGTCATTAAGTATGCAAGT  
>HPV88\_Gamma\_167600365\_nt2801\_Genome\_Tile|1  
AAAATTTGCAAAAAGAGCCATGGTCATTAAGTATGCAAGTGCAGAGCTTGTAATACTCC  
>HPV88\_Gamma\_167600365\_nt2841\_Genome\_Tile|1  
GCAGAGCTTGTAATACTCCTCCTAGGGACTGCTTCAAAAAGGAGGATTTACAGTAACT  
>HPV88\_Gamma\_167600365\_nt2861\_Genome\_Tile|1  
TCCTAGGGACTGCTTCAAAAAGGAGGATTTACAGTAACTGTGTACTTTGATAATGATCG  
>HPV88\_Gamma\_167600365\_nt2881\_Genome\_Tile|1  
AAGGAGGATTTACAGTAACTGTGTACTTTGATAATGATCGAGAAAACAGCTTTCCTTACA  
>HPV88\_Gamma\_167600365\_nt2901\_Genome\_Tile|1  
GTGTACTTTGATAATGATCGAGAAAACAGCTTTCCTTACACACAATGGGAACATATTTAT  
>HPV88\_Gamma\_167600365\_nt2921\_Genome\_Tile|1  
AGAAAACAGCTTTCCTTACACACAATGGGAACATATTTATTATCAGGACCAGAACGAGCA  
>HPV88\_Gamma\_167600365\_nt2941\_Genome\_Tile|1  
CACAATGGGAACATATTTATTATCAGGACCAGAACGAGCAGTGGCATAAAGTGCCAGGTG  
>HPV88\_Gamma\_167600365\_nt2961\_Genome\_Tile|1  
TATCAGGACCAGAACGAGCAGTGGCATAAAGTGCCAGGTGGTGTGATCACAATGGGCTG  
>HPV88\_Gamma\_167600365\_nt2981\_Genome\_Tile|1  
GTGGCATAAAGTGCCAGGTGGTGTGATCACAATGGGCTGTACTATGATGAGGAAAATAC  
>HPV88\_Gamma\_167600365\_nt3001\_Genome\_Tile|1  
GTGTTGATCACAATGGGCTGTACTATGATGAGGAAAATACCAATGAAAGGGTATATTTCC  
>HPV88\_Gamma\_167600365\_nt3021\_Genome\_Tile|1  
TACTATGATGAGGAAAATACCAATGAAAGGGTATATTTCTTTTATTTGAGCCTGAGTCT  
>HPV88\_Gamma\_167600365\_nt3041\_Genome\_Tile|1  
CAATGAAAGGGTATATTTCTTTTATTTGAGCCTGAGTCTCAAAAATATGGCAGTAGTGG  
>HPV88\_Gamma\_167600365\_nt3081\_Genome\_Tile|1  
CAAAAATATGGCAGTAGTGGACAATGGACTGTGCATTATAAAAATACTACTGTTTCTGCC  
>HPV88\_Gamma\_167600365\_nt3121\_Genome\_Tile|1  
AAAATACTACTGTTTCTGCCTCTGCCACCAGCTCTTCTAGGCGGTCTCTACCCATCTCCA  
>HPV88\_Gamma\_167600365\_nt3161\_Genome\_Tile|1  
GCGGTCCCTACCCATCTCCACCAAAACCGATTTCGACGCCACAACCGCCGGCAACACCAC  
>HPV88\_Gamma\_167600365\_nt3181\_Genome\_Tile|1  
CCAAAACCGATTTGACGCCACAACCGCCGGCAACACCACGACCTCTGCCCCGCAGAGAA  
>HPV88\_Gamma\_167600365\_nt3201\_Genome\_Tile|1  
ACAACCGCCGGCAACACCACGACCTCTGCCCCGCAGAGAAGTCCAAGGAAGCGACTACAA  
>HPV88\_Gamma\_167600365\_nt3221\_Genome\_Tile|1

GACCTCTGCCCCGCAGAGAAGTCCAAGGAAGCGACTACAAGAGGCGGTCAGCTCAACCAC  
>HPV88\_Gamma\_167600365\_nt3341\_Genome\_Tile|1  
CTCCGGAGCAAAGAGAAGAAGAACAGCCACCGACGGAAACACTCTCGGAGAATCTGTCCC  
>HPV88\_Gamma\_167600365\_nt3521\_Genome\_Tile|1  
TACCCCTTAAATGCTGGAGAAATAGAATGAAAAAAATAGTTCTCCAATTTAGTTTGCAG  
>HPV88\_Gamma\_167600365\_nt3541\_Genome\_Tile|1  
ATAGAATGAAAAAAATAGTTCTCCAATTTAGTTTGCAGCTCAGTCTGGAGATGGATAG  
>HPV88\_Gamma\_167600365\_nt3561\_Genome\_Tile|1  
TCCTCCAATTTAGTTTGCAGCTCAGTCTGGAGATGGATAGATAGTACCACCCATGAAAAAC  
>HPV88\_Gamma\_167600365\_nt3581\_Genome\_Tile|1  
CTCAGTCTGGAGATGGATAGATAGTACCACCCATGAAAACAGCCGCATGCTTGTAGCATT  
>HPV88\_Gamma\_167600365\_nt3601\_Genome\_Tile|1  
ATAGTACCACCCATGAAAACAGCCGCATGCTTGTAGCATTTCAAAATACTGCTGAAAGAA  
>HPV88\_Gamma\_167600365\_nt3641\_Genome\_Tile|1  
TCAAATACTGCTGAAAGAACTCGATTCTAAATTCAGTGACTTTGCCAAAGGGTACAAC  
>HPV88\_Gamma\_167600365\_nt3661\_Genome\_Tile|1  
CTCGATTTCTAAATTCAGTGACTTTGCCAAAGGGTACAACCTACGCATTTGGTTACCTTG  
>HPV88\_Gamma\_167600365\_nt3681\_Genome\_Tile|1  
ACTTTGCCAAAGGGTACAACCTACGCATTTGGTTACCTTGATTGTAATGTAATGTATA  
>HPV88\_Gamma\_167600365\_nt3701\_Genome\_Tile|1  
CTACGCATTTGGTTACCTTGATTGTAATGTAATGTAATAAAACCAGAAGTAAACGTGAC  
>HPV88\_Gamma\_167600365\_nt3721\_Genome\_Tile|1  
ATTCATTGTAATGTAATAAAACCAGAAGTAAACGTGACACTGCTGAGAATTTGTATAG  
>HPV88\_Gamma\_167600365\_nt3741\_Genome\_Tile|1  
AAACCAGAAGTAAACGTGACACTGCTGAGAATTTGTATAGACACTGTAAAGCTACTGGCA  
>HPV88\_Gamma\_167600365\_nt3761\_Genome\_Tile|1  
ACTGCTGAGAATTTGTATAGACACTGTAAAGCTACTGGCAACTGTCTCCAGATGTAGAA  
>HPV88\_Gamma\_167600365\_nt3841\_Genome\_Tile|1  
ATTAGCAGATCGATTGCTGCGCATTTTTGGTAGTGTTATATACCTGGGGGGTCTGGGTCT  
>HPV88\_Gamma\_167600365\_nt3881\_Genome\_Tile|1  
TACCTGGGGGGTCTGGGTCTTGGTACAGGGGAGGGCACAACAGGTATTAGACCTATAGAA  
>HPV88\_Gamma\_167600365\_nt3921\_Genome\_Tile|1  
CAGGTATTAGACCTATAGAAGCTCCTGTTGAAACAGTTTCGCCCAGATATAACCGTAGAGA  
>HPV88\_Gamma\_167600365\_nt3941\_Genome\_Tile|1  
GCTCCTGTTGAAACAGTTTCGCCCAGATATAACCGTAGAGAGACCCACAGTAAGACCAAGA  
>HPV88\_Gamma\_167600365\_nt3961\_Genome\_Tile|1  
CCCAGATATAACCGTAGAGAGACCCACAGTAAGACCAAGACCACAAAGACCTACCACTTT  
>HPV88\_Gamma\_167600365\_nt3981\_Genome\_Tile|1  
GACCCACAGTAAGACCAAGACCACAAAGACCTACCACTTTTCGGTACACCTATAGATAGAA  
>HPV88\_Gamma\_167600365\_nt4001\_Genome\_Tile|1  
CCACAAAGACCTACCACTTTTCGGTACACCTATAGATAGAATTGGATCTGCTGATATCACT  
>HPV88\_Gamma\_167600365\_nt4021\_Genome\_Tile|1  
CGGTACACCTATAGATAGAATTGGATCTGCTGATATCACTCCTAATGTAGTTAAGCCCAC  
>HPV88\_Gamma\_167600365\_nt4041\_Genome\_Tile|1  
TTGGATCTGCTGATATCACTCCTAATGTAGTTAAGCCCACAGAATCCTCTATCGTGCCCC  
>HPV88\_Gamma\_167600365\_nt4061\_Genome\_Tile|1  
CCTAATGTAGTTAAGCCCACAGAATCCTCTATCGTGCCCCTAAATGAAAGTGGGATTCCA  
>HPV88\_Gamma\_167600365\_nt4081\_Genome\_Tile|1  
AGAATCCTCTATCGTGCCCTAAATGAAAGTGGGATTCCAGACCCTACAATTATAGATTCT  
>HPV88\_Gamma\_167600365\_nt4101\_Genome\_Tile|1  
TAAATGAAAGTGGGATTCCAGACCCTACAATTATAGATTCTGCAACAGGGGGTGGTGAGG  
>HPV88\_Gamma\_167600365\_nt4121\_Genome\_Tile|1  
GACCCTACAATTATAGATTCTGCAACAGGGGGTGGTGAGGGTCTAGGAGAATATGACATA  
>HPV88\_Gamma\_167600365\_nt4161\_Genome\_Tile|1  
GTCTAGGAGAATATGACATATTGACCACTGTAGATCCAAATGAGACCCTCGGAGCTACAG

>HPV88\_Gamma\_167600365\_nt4181\_Genome\_Tile|1  
TTGACCACTGTAGATCCAAATGAGACCTCGGAGCTACAGGGGGGCATCCTACCACCTTCT  
>HPV88\_Gamma\_167600365\_nt4221\_Genome\_Tile|1  
GGGGGCATCCTACCACCTTCTGGTACACTTAATAATGAAACAGCAATCTTAGACATCAGTC  
>HPV88\_Gamma\_167600365\_nt4241\_Genome\_Tile|1  
GGTACACTTAATAATGAAACAGCAATCTTAGACATCAGTCCCTATGAACCTCCTCCAAAA  
>HPV88\_Gamma\_167600365\_nt4261\_Genome\_Tile|1  
AGCAATCTTAGACATCAGTCCCTATGAACCTCCTCCAAAACGTTTTGCACTTGCCCCAAG  
>HPV88\_Gamma\_167600365\_nt4361\_Genome\_Tile|1  
CTACCTACAGAATCAAACATAAATGTGTTTGTAGATGCTAATATTACAGGTGAAATTGTT  
>HPV88\_Gamma\_167600365\_nt4381\_Genome\_Tile|1  
AAATGTGTTTGTAGATGCTAATATTACAGGTGAAATTGTTGGTGAAGAAATCCCATTAGA  
>HPV88\_Gamma\_167600365\_nt4401\_Genome\_Tile|1  
ATATTACAGGTGAAATTGTTGGTGAAGAAATCCCATTAGAGCCTATAAATCTATAGAAG  
>HPV88\_Gamma\_167600365\_nt4421\_Genome\_Tile|1  
GGTGAAGAAATCCCATTAGAGCCTATAAATCTATAGAAGAATTGAAATAGAGGCTGGG  
>HPV88\_Gamma\_167600365\_nt4441\_Genome\_Tile|1  
GCCTATAAATCTATAGAAGAATTCGAAATAGAGGCTGGGCGCCAGACTAGTACTCCTAG  
>HPV88\_Gamma\_167600365\_nt4461\_Genome\_Tile|1  
AATTCGAAATAGAGGCTGGGCGCCAGACTAGTACTCCTAGGGAAGCTGTTGAAAGATTTTC  
>HPV88\_Gamma\_167600365\_nt4481\_Genome\_Tile|1  
CGCCAGACTAGTACTCCTAGGGAAGCTGTTGAAAGATTTCTTGGGCGGGCCAGAAGCTTA  
>HPV88\_Gamma\_167600365\_nt4521\_Genome\_Tile|1  
TTGGGCGGGCCAGAAGCTTATATAATCGTTACATTCAACAAATCAGAACAGACAATGTTG  
>HPV88\_Gamma\_167600365\_nt4561\_Genome\_Tile|1  
AATCAGAACAGACAATGTTGACTTTTTTAACCCGGCCTTCACGCGGGTTCAATTTGAATT  
>HPV88\_Gamma\_167600365\_nt4621\_Genome\_Tile|1  
TGAAAATCCCGCCTTTACTGGTGATGTAAGTCTTGAATTTGCGCGGGATGTTGCTGAAAT  
>HPV88\_Gamma\_167600365\_nt4641\_Genome\_Tile|1  
GTGATGTAAGTCTTGAATTTGCGCGGGATGTTGCTGAAATAACAGCGGCTCCTGATCCAG  
>HPV88\_Gamma\_167600365\_nt4761\_Genome\_Tile|1  
TGCGAGTCAGCAGATTGGGAACAAAAGGAGCGATTAGTACCAGAAGCGGTACCATAATAG  
>HPV88\_Gamma\_167600365\_nt4781\_Genome\_Tile|1  
ACAAAAGGAGCGATTAGTACCAGAAGCGGTACCATAATAGGTCCCTCGTGTGCACTACTAC  
>HPV88\_Gamma\_167600365\_nt4801\_Genome\_Tile|1  
CAGAAGCGGTACCATAATAGGTCCCTCGTGTGCACTACTACTTTGATCTTAGTGCAATTGA  
>HPV88\_Gamma\_167600365\_nt4821\_Genome\_Tile|1  
GTCCTCGTGTGCACTACTACTTTGATCTTAGTGCAATTGAACCTATAGAGCCTGATGTTA  
>HPV88\_Gamma\_167600365\_nt4841\_Genome\_Tile|1  
TTTGATCTTAGTGCAATTGAACCTATAGAGCCTGATGTTATTGAGCTTTCTAATTTAGGG  
>HPV88\_Gamma\_167600365\_nt4861\_Genome\_Tile|1  
ACCTATAGAGCCTGATGTTATTGAGCTTTCTAATTTAGGGGAGTTTAGTGGGGAAAGTAC  
>HPV88\_Gamma\_167600365\_nt4881\_Genome\_Tile|1  
TTGAGCTTTCTAATTTAGGGGAGTTTAGTGGGGAAAGTACAATTGTAGATTCAATTTTAT  
>HPV88\_Gamma\_167600365\_nt4921\_Genome\_Tile|1  
AATTGTAGATTCAATTTTATCTGGGCATACAGTAGATCCTATAGCACCTTTTGAGTCAAC  
>HPV88\_Gamma\_167600365\_nt4941\_Genome\_Tile|1  
CTGGGCATACAGTAGATCCTATAGCACCTTTTGAGTCAACATTTTCTATTGCAGATCTAG  
>HPV88\_Gamma\_167600365\_nt4961\_Genome\_Tile|1  
ATAGCACCTTTTGAGTCAACATTTTCTATTGCAGATCTAGAAGACCCCTTTACTAGAGGAC  
>HPV88\_Gamma\_167600365\_nt4981\_Genome\_Tile|1  
ATTTTCTATTGCAGATCTAGAAGACCCCTTTACTAGAGGACTTTAGTAATAGTCACCTTATT  
>HPV88\_Gamma\_167600365\_nt5001\_Genome\_Tile|1  
AAGACCCCTTTACTAGAGGACTTTAGTAATAGTCACCTTATTTGTGCATTTTGAGGAAGAGG  
>HPV88\_Gamma\_167600365\_nt5021\_Genome\_Tile|1

TTTAGTAATAGTCACTTATTTGTGCATTTTGAGGAAGAGGATGAACTTATATCTGTTTCCT  
>HPV88\_Gamma\_167600365\_nt5061\_Genome\_Tile|1  
ATGAACTTATATCTGTTTCCTACTCTTCCTCCTGGCGCAGCAATAAAAGCTTTTGTAGATG  
>HPV88\_Gamma\_167600365\_nt5101\_Genome\_Tile|1  
AATAAAAGCTTTTGTAGATGATTATGCAGATATTATAGTTTCATATCCTGAAATGGTAAA  
>HPV88\_Gamma\_167600365\_nt5121\_Genome\_Tile|1  
ATTATGCAGATATTATAGTTTCATATCCTGAAATGGTAAATGTAAACAAAATTGAAATCC  
>HPV88\_Gamma\_167600365\_nt5141\_Genome\_Tile|1  
TCATATCCTGAAATGGTAAATGTAAACAAAATTGAAATCCCTGCAACTACATTAGTGCCC  
>HPV88\_Gamma\_167600365\_nt5161\_Genome\_Tile|1  
TGTAACAAAATTGAAATCCCTGCAACTACATTAGTGCCCTCTGAACCAGACATTAGACT  
>HPV88\_Gamma\_167600365\_nt5181\_Genome\_Tile|1  
CTGCAACTACATTAGTGCCCTCTGAACCAGACATTAGACTAGATTGGTTTTCTCCAGATT  
>HPV88\_Gamma\_167600365\_nt5201\_Genome\_Tile|1  
TCTGAACCAGACATTAGACTAGATTGGTTTTCTCCAGATTATGATTTGCACCCTTCTTTA  
>HPV88\_Gamma\_167600365\_nt5281\_Genome\_Tile|1  
CAAACGCAATATGTTTTGATGTTTTGCAGATGGCATTATGGCAACAACAACTGGGAAGC  
>HPV88\_Gamma\_167600365\_nt5321\_Genome\_Tile|1  
GCAACAACAACTGGGAAGCTGTTCCCTCCGCGGCTAAACCTGTGGCAAAAATATTATC  
>HPV88\_Gamma\_167600365\_nt5341\_Genome\_Tile|1  
TGTTCCCTCCGCGGCTAAACCTGTGGCAAAAATATTATCTACAGATGATTATGTTATTG  
>HPV88\_Gamma\_167600365\_nt5361\_Genome\_Tile|1  
CCTGTGGCAAAAATATTATCTACAGATGATTATGTTATTGGAACCTCAGTTACATTTTCAT  
>HPV88\_Gamma\_167600365\_nt5381\_Genome\_Tile|1  
TACAGATGATTATGTTATTGGAACCTCAGTTACATTTTCATGCTGGCACTGATCGTCTGTT  
>HPV88\_Gamma\_167600365\_nt5421\_Genome\_Tile|1  
GCTGGCACTGATCGTCTGTAAACAGTAGACCATCCCTACTATGAAATTAGGAATGATGGA  
>HPV88\_Gamma\_167600365\_nt5441\_Genome\_Tile|1  
AACAGTAGACCATCCCTACTATGAAATTAGGAATGATGGAGATCCCAACAAAATTGAGAT  
>HPV88\_Gamma\_167600365\_nt5461\_Genome\_Tile|1  
ATGAAATTAGGAATGATGGAGATCCCAACAAAATTGAGATTCCTAAGGTGTCTGCATGCC  
>HPV88\_Gamma\_167600365\_nt5521\_Genome\_Tile|1  
AATATCGAGTGTTTAGGCTGAAATTGCCTGATCCAAATAAATTTGCCTTAATAGATCAGT  
>HPV88\_Gamma\_167600365\_nt5541\_Genome\_Tile|1  
AAATTGCCTGATCCAAATAAATTTGCCTTAATAGATCAGTCAATTTTCAATCCTGAACGT  
>HPV88\_Gamma\_167600365\_nt5561\_Genome\_Tile|1  
ATTTGCCTTAATAGATCAGTCAATTTTCAATCCTGAACGTGAACGTTTAGTTTGGAAATT  
>HPV88\_Gamma\_167600365\_nt5581\_Genome\_Tile|1  
CAATTTTCAATCCTGAACGTGAACGTTTAGTTTGGAAATTAAAAGGTATTCAAATTGGTA  
>HPV88\_Gamma\_167600365\_nt5601\_Genome\_Tile|1  
GAACGTTTAGTTTGGAAATTAAAAGGTATTCAAATTGGTAGAGGTGGACCACTAAATGTA  
>HPV88\_Gamma\_167600365\_nt5621\_Genome\_Tile|1  
AAAAGGTATTCAAATTGGTAGAGGTGGACCACTAAATGTAGGTACTGCAGGTCATCCTTT  
>HPV88\_Gamma\_167600365\_nt5681\_Genome\_Tile|1  
ATTTAACAAAGCTCCAGATACTGAAAATCCTAATGATTATCCACCAGCTCAAACAGATGA  
>HPV88\_Gamma\_167600365\_nt5741\_Genome\_Tile|1  
AGACAGACGTAACGTGTCTATGGACCCCAACATACCCAATTATTTATAATTGGTTGCAT  
>HPV88\_Gamma\_167600365\_nt5761\_Genome\_Tile|1  
TGGACCCCAACATACCCAATTATTTATAATTGGTTGCATTCTCAGATGGTGAATATT  
>HPV88\_Gamma\_167600365\_nt5821\_Genome\_Tile|1  
GGGATGTTGCTAAACCATGTGTTGGAGATCAGGCGAATGCAGGAGACTGTCCACCTATAC  
>HPV88\_Gamma\_167600365\_nt5841\_Genome\_Tile|1  
GTTGGAGATCAGGCGAATGCAGGAGACTGTCCACCTATACAGTTAGTTAATGCTGTTATT  
>HPV88\_Gamma\_167600365\_nt5861\_Genome\_Tile|1  
AGGAGACTGTCCACCTATACAGTTAGTTAATGCTGTTATTCAGGACGGAACAATGGGTGA

>HPV88\_Gamma\_167600365\_nt5901\_Genome\_Tile|1  
CAGGACGGAACAATGGGTGACACAGGTTTTGGGGCAGCAAATTTTAAGAACTTTTTGCAA  
>HPV88\_Gamma\_167600365\_nt5941\_Genome\_Tile|1  
ATTTTAAGAACTTTTTGCAAGACAAAGCAGGTGTTCCCTCTGGATATTATTAATGATATAT  
>HPV88\_Gamma\_167600365\_nt6041\_Genome\_Tile|1  
TGGCGATAAATGTTTCTTTTTTGGAAAACGTGAGCAGTCGTATGCTCGCCATTTTATGGC  
>HPV88\_Gamma\_167600365\_nt6081\_Genome\_Tile|1  
TATGCTCGCCATTTTATGGCTCGTGAAAGGTAAAATGGGAGATGCCATACCAGAGGGAAAT  
>HPV88\_Gamma\_167600365\_nt6121\_Genome\_Tile|1  
ATGCCATACCAGAGGGAAATAAATACTTATTGCCACCTACAAATGCTGTGAATTTTAAAA  
>HPV88\_Gamma\_167600365\_nt6141\_Genome\_Tile|1  
AAATACTTATTGCCACCTACAAATGCTGTGAATTTTAAAATGGGATCTCATGTTTATTTT  
>HPV88\_Gamma\_167600365\_nt6161\_Genome\_Tile|1  
AAATGCTGTGAATTTTAAAATGGGATCTCATGTTTATTTCCCTACTGCTAGTGGATCACT  
>HPV88\_Gamma\_167600365\_nt6181\_Genome\_Tile|1  
TGGGATCTCATGTTTATTTCCCTACTGCTAGTGGATCACTTACTACTAGTGATTCTAACT  
>HPV88\_Gamma\_167600365\_nt6201\_Genome\_Tile|1  
CCTACTGCTAGTGGATCACTTACTACTAGTGATTCTAACTTATTTAACAGACCTTATTGG  
>HPV88\_Gamma\_167600365\_nt6341\_Genome\_Tile|1  
TACTAATTTTACTCTTTCCATTTATAATCAGGGAGGAGCTATTGGAAATCAGTATACTTA  
>HPV88\_Gamma\_167600365\_nt6361\_Genome\_Tile|1  
TTTATAATCAGGGAGGAGCTATTGGAAATCAGTATACTTATAAATCTCAAGATTTTACTC  
>HPV88\_Gamma\_167600365\_nt6381\_Genome\_Tile|1  
ATTGGAAATCAGTATACTTATAAATCTCAAGATTTTACTCAGTATACTCGACATGCAGAG  
>HPV88\_Gamma\_167600365\_nt6401\_Genome\_Tile|1  
TAAATCTCAAGATTTTACTCAGTATACTCGACATGCAGAGGAATACGAATTGGAAGCTAT  
>HPV88\_Gamma\_167600365\_nt6421\_Genome\_Tile|1  
AGTATACTCGACATGCAGAGGAATACGAATTGGAAGCTATATTCCAGCTTGTAGAGTTC  
>HPV88\_Gamma\_167600365\_nt6481\_Genome\_Tile|1  
CTTTGGAGCCTGATATTTTAGCTCACTTAAATGTTATGAATCCTAATATATTAGATGAAT  
>HPV88\_Gamma\_167600365\_nt6581\_Genome\_Tile|1  
GGACAATTATAGATATATAACATCTTTGGCAACAAGATGTCCTACTGAAAATCCTGCTCC  
>HPV88\_Gamma\_167600365\_nt6601\_Genome\_Tile|1  
CATCTTTGGCAACAAGATGTCCTACTGAAAATCCTGCTCCAGAAATACCTGACCCTTATA  
>HPV88\_Gamma\_167600365\_nt6621\_Genome\_Tile|1  
CCTACTGAAAATCCTGCTCCAGAAATACCTGACCCTTATAAAGATTATAATTTTTGGTTA  
>HPV88\_Gamma\_167600365\_nt6641\_Genome\_Tile|1  
AGAAATACCTGACCCTTATAAAGATTATAATTTTTGGTTAGTTGATTGCAAGAGAAGTT  
>HPV88\_Gamma\_167600365\_nt6661\_Genome\_Tile|1  
AAGATTATAATTTTTGGTTAGTTGATTGCAAGAGAAGTTCTCCAGTGAACCTTGACCAAT  
>HPV88\_Gamma\_167600365\_nt6681\_Genome\_Tile|1  
GTTGATTGCAAGAGAAGTTCTCCAGTGAACCTTGACCAATTTAGCTTAGGTGCGCAAATTT  
>HPV88\_Gamma\_167600365\_nt6761\_Genome\_Tile|1  
GCCCACAAAACGTGTCAGGACAGTTGCCAATAGTTCTGTTAGAAATACTTCCAGAACAGT  
>HPV88\_Gamma\_167600365\_nt6801\_Genome\_Tile|1  
AGAAATACTTCCAGAACAGTAAAAAGAAAACGAACACGATAATTGCATATTTAAGATAAT  
>HPV88\_Gamma\_167600365\_nt6821\_Genome\_Tile|1  
AAAAAGAAAACGAACACGATAATTGCATATTTAAGATAATTACATCCTGAAGCCCATAAA  
>HPV88\_Gamma\_167600365\_nt6841\_Genome\_Tile|1  
AATTGCATATTTAAGATAATTACATCCTGAAGCCCATAAAACTGTGAAATAATTGCTGTG  
>HPV88\_Gamma\_167600365\_nt6861\_Genome\_Tile|1  
TACATCCTGAAGCCCATAAAACTGTGAAATAATTGCTGTGACTCTTGATCAACTTGGTA  
>HPV88\_Gamma\_167600365\_nt6881\_Genome\_Tile|1  
ACTGTGAAATAATTGCTGTGACTCTTGATCAACTTGGTACCAACTTGCTGATAATACT  
>HPV88\_Gamma\_167600365\_nt6901\_Genome\_Tile|1

ACTCTTGATCAACTTGGTACCAACTTGCCTGATAATACTTGAAGGAATGTATTGATTAA  
>HPV88\_Gamma\_167600365\_nt6921\_Genome\_Tile|1  
CCAACCTTGCCTGATAATACTTGAAGGAATGTATTGATTAAATAAATTGCTGCTATACCAT  
>HPV88\_Gamma\_167600365\_nt6941\_Genome\_Tile|1  
TGAAGGAATGTATTGATTAAATAAATTGCTGCTATACCATCAGTTGAGTCATGGGGTCGT  
>HPV88\_Gamma\_167600365\_nt6981\_Genome\_Tile|1  
CAGTTGAGTCATGGGGTCGTCATTTATGGTCTCCACCCGTCCACTCGACCTTATAAGTGT  
>HPV88\_Gamma\_167600365\_nt7001\_Genome\_Tile|1  
CATTTATGGTCTCCACCCGTCCACTCGACCTTATAAGTGTGGTCAGCAGGCTGGACAGGT  
>HPV88\_Gamma\_167600365\_nt7021\_Genome\_Tile|1  
CCACTCGACCTTATAAGTGTGGTCAGCAGGCTGGACAGGTAGTATTGTCCAGCGAAGTAA  
>HPV88\_Gamma\_167600365\_nt7081\_Genome\_Tile|1  
TCCAGCTGTCAAACCATTAAGGTAAGTTGTTTGGAACATAGCCGTCTCTCGAACGGAAG  
>HPV88\_Gamma\_167600365\_nt7121\_Genome\_Tile|1  
AGCCGTCTCTCGAACGGAAGCGGTACAAAATGTGCCCTAAAGGCCTTTTAATAACCGTCT  
>HPV88\_Gamma\_167600365\_nt7141\_Genome\_Tile|1  
CGGTACAAAATGTGCCCTAAAGGCCTTTTAATAACCGTCTCTGGTATTTTGGCGCCTTTT  
>HPV88\_Gamma\_167600365\_nt7161\_Genome\_Tile|1  
AGGCCTTTTAATAACCGTCTCTGGTATTTTGGCGCCTTTTTTTTCGCGTGAAGTGAAGTT  
>HPV88\_Gamma\_167600365\_nt7201\_Genome\_Tile|1  
TTTTTCGCGTGAAGTTCAGACACTCATGTATTGAGTCAGACACATGGCAGAATATG  
>HPV88\_Gamma\_167600365\_nt7221\_Genome\_Tile|1  
CAGACACTCATGTATTGAGTCAGACACATGGCAGAATATGTTTTTGGCTGCCTGCCTATG  
>HPV88\_Gamma\_167600365\_nt7261\_Genome\_Tile|1  
TTTTTGGCTGCCTGCCTATGTACCGGGAGTGGTGACCGGGAGTGGTGTTACAGACATTA  
>HPV58\_Alpha\_222386\_nt0081\_Genome\_Tile|1  
GACATTTTTTGGTAGGCTACTGCAGGACTATGTTCCAGGACGCAGAGGAGAAACCACGGA  
>HPV58\_Alpha\_222386\_nt0141\_Genome\_Tile|1  
CATTGCATGATTTGTGTCAGGCGTTGGAGACATCTGTGCATGAAATCGAATTGAAATGCG  
>HPV58\_Alpha\_222386\_nt0261\_Genome\_Tile|1  
GAATAGTGTATAGAGATGGAAATCCATTTGCAGTATGTAAAGTGTGCTTACGATTGCTAT  
>HPV58\_Alpha\_222386\_nt0281\_Genome\_Tile|1  
AATCCATTTGCAGTATGTAAAGTGTGCTTACGATTGCTATCTAAAATAAGTGAGTATAGA  
>HPV58\_Alpha\_222386\_nt0301\_Genome\_Tile|1  
AGTGTGCTTACGATTGCTATCTAAAATAAGTGAGTATAGACATTATAATTATTCGCTATA  
>HPV58\_Alpha\_222386\_nt0541\_Genome\_Tile|1  
TAGACAAACACAAGTGTAACTGTAAACCGCCATGAGAGGAAACAACCCAACGCTAAGA  
>HPV58\_Alpha\_222386\_nt1001\_Genome\_Tile|1  
CAGACGATAGTGGTACAGATTTAATAGAGTTTATAGATGATTTCAGTACAAAAGTACTACAC  
>HPV58\_Alpha\_222386\_nt1381\_Genome\_Tile|1  
AGTTCAGATGTAAGCAGTGAAACGGATGTAGACAGTTGTAATACTGTTCCATTACAAAAT  
>HPV58\_Alpha\_222386\_nt1401\_Genome\_Tile|1  
AACGGATGTAGACAGTTGTAATACTGTTCCATTACAAAATATTAGTAATATTCTACATAA  
>HPV58\_Alpha\_222386\_nt3161\_Genome\_Tile|1  
ATATATATTATTGAGGAAACAACATGTACTTTGGTAGCAGGAGAAGTTGACTATGTGGGG  
>HPV58\_Alpha\_222386\_nt3201\_Genome\_Tile|1  
GAGAAGTTGACTATGTGGGGTTGTATTATATACATGGCAATGAAAAGACGTATTTTAAAT  
>HPV58\_Alpha\_222386\_nt3401\_Genome\_Tile|1  
GCCACCAACAACGAAAGTACACAGGGGACAAAGCGACGACGACTCGATTTACCAGACTCC  
>HPV58\_Alpha\_222386\_nt3421\_Genome\_Tile|1  
ACAGGGGACAAAGCGACGACGACTCGATTTACCAGACTCCAGAGACAACCCCAGTACTC  
>HPV58\_Alpha\_222386\_nt3501\_Genome\_Tile|1  
CCGTGGACAGTAGACCACGAGGAGGAGGACTACACAGTACAAGTAACTGTACATACAAAG  
>HPV58\_Alpha\_222386\_nt3801\_Genome\_Tile|1  
AAATAAGTACTGGTGTATTGTTCATTGTAATTGTATTGTACAATTACTGTATGTAAACCAC



>HPV58\_Alpha\_222386\_nt3881\_Genome\_Tile|1  
GTGTATATACAATGATATTACCTATTTTTGTTGTTTGTGTTTATACTGTTTTATGCTTGT  
>HPV58\_Alpha\_222386\_nt3901\_Genome\_Tile|1  
CCTATTTTTGTTGTTTGTGTTTATACTGTTTTATGCTTGTGCATTTTTTTGCGGCCATTG  
>HPV58\_Alpha\_222386\_nt3921\_Genome\_Tile|1  
TATACTGTTTTATGCTTGTGCATTTTTTTGCGGCCATTGGTGCTATCTATTTCTATATA  
>HPV58\_Alpha\_222386\_nt3941\_Genome\_Tile|1  
GCATTTTTTTGCGGCCATTGGTGCTATCTATTTCTATATATGCTTGGTTGCTGGTGTGG  
>HPV58\_Alpha\_222386\_nt4081\_Genome\_Tile|1  
TGTATTAATTTTCATGCACAATACTTAACCCAACAAGACTAACTGTATACTGGTTCTGCA  
>HPV58\_Alpha\_222386\_nt4101\_Genome\_Tile|1  
ATACTTAACCCAACAAGACTAACTGTATACTGGTTCTGCACATGGTGGTATGGTATTGTA  
>HPV58\_Alpha\_222386\_nt4121\_Genome\_Tile|1  
AACTGTATACTGGTTCTGCACATGGTGGTATGGTATTGTAAATATTTACTGTTGTGTGTG  
>HPV58\_Alpha\_222386\_nt4181\_Genome\_Tile|1  
TTGTTTTTATTATTTTTATACATTTACTAATAAATACTTTTATATTTTTAGCACTGTCTT  
>HPV58\_Alpha\_222386\_nt4441\_Genome\_Tile|1  
TGGCAGGACTGGATATGTGCCCCCTGGTAGTACCCACCGTCTGAGGCTATACCTTTACA  
>HPV58\_Alpha\_222386\_nt4461\_Genome\_Tile|1  
CCCTTGGTAGTACCCACCGTCTGAGGCTATACCTTTACAGCCCATACGTCCCCCAGTTA  
>HPV58\_Alpha\_222386\_nt5161\_Genome\_Tile|1  
AAAGGCTACACTTCGTA CTGCACTGCGAGTGGAAGCAAATAGGGGCTAAAGTACATTACTACCA  
>HPV58\_Alpha\_222386\_nt5181\_Genome\_Tile|1  
GCAGTGGAAAGCAAATAGGGGCTAAAGTACATTACTACCAAGACTTAAGTCCCATACAGC  
>HPV58\_Alpha\_222386\_nt5221\_Genome\_Tile|1  
AGACTTAAGTCCCATACAGCCTGTCCAGGAACAGGTACAACAGCAGCAACAATTTGAATT  
>HPV58\_Alpha\_222386\_nt5241\_Genome\_Tile|1  
CTGTCCAGGAACAGGTACAACAGCAGCAACAATTTGAATTACAATCTTTAAATACTTCTG  
>HPV58\_Alpha\_222386\_nt5261\_Genome\_Tile|1  
CAGCAGCAACAATTTGAATTACAATCTTTAAATACTTCTGTTTCTCCCTATAGTATTAAT  
>HPV58\_Alpha\_222386\_nt5281\_Genome\_Tile|1  
ACAATCTTTAAATACTTCTGTTTCTCCCTATAGTATTAATGATGGACTTTATGATATTTA  
>HPV58\_Alpha\_222386\_nt5321\_Genome\_Tile|1  
GATGGACTTTATGATATTTATGCTGACGATGCTGATACTATACATGATTTTCAGAGTCCT  
>HPV58\_Alpha\_222386\_nt5341\_Genome\_Tile|1  
TGCTGACGATGCTGATACTATACATGATTTTCAGAGTCCTCTGCACTCACATACGTCCTT  
>HPV58\_Alpha\_222386\_nt5361\_Genome\_Tile|1  
TACATGATTTTCAGAGTCCTCTGCACTCACATACGTCCTTTGCCACCACACGTACCAGTA  
>HPV58\_Alpha\_222386\_nt5421\_Genome\_Tile|1  
ATGTGTCCATACCATTAAATACTGGATTTGACACTCCTCTTGTGTCAATTGGAACCTGGTC  
>HPV58\_Alpha\_222386\_nt5441\_Genome\_Tile|1  
ACTGGATTTGACACTCCTCTTGTGTCAATTGGAACCTGGTCCAGACATTGCATCTTCTGTA  
>HPV58\_Alpha\_222386\_nt5481\_Genome\_Tile|1  
CAGACATTGCATCTTCTGTAAACATCTATGTCTAGTCCATTTATTCCTATATCTCCACTAA  
>HPV58\_Alpha\_222386\_nt5501\_Genome\_Tile|1  
ACATCTATGTCTAGTCCATTTATTCCTATATCTCCACTAACTCCTTTTAATACCATAATT  
>HPV58\_Alpha\_222386\_nt5521\_Genome\_Tile|1  
TATTCCTATATCTCCACTAACTCCTTTTAATACCATAATTGTGGATGGTGTGCTGATTTTAT  
>HPV58\_Alpha\_222386\_nt5541\_Genome\_Tile|1  
CTCCTTTTAATACCATAAATTGTGGATGGTGTGCTGATTTTATGTTGCACCCTAGCTATTTTA  
>HPV58\_Alpha\_222386\_nt5801\_Genome\_Tile|1  
AAGTCCCAATAACAATAAAAAAGTATTAGTTCCCAAGGTATCAGGCTTACAGTATAGGGT  
>HPV58\_Alpha\_222386\_nt6441\_Genome\_Tile|1  
CTTGGCGAGGCTGTCCCGGATGACCTTTATATTAAAGGGTCCGGTAATACTGCAGTTATC  
>HPV58\_Alpha\_222386\_nt6461\_Genome\_Tile|1

TGACCTTTATATTAAAGGGTCCGGTAATACTGCAGTTATCCAAAGTAGTGCATTTTTTCC  
>HPV58\_Alpha\_222386\_nt7121\_Genome\_Tile|1  
CAAAAAGGTAAAAAATAATTGTTGTGGTACTTACACTATTTTATTATACATGTTTGT  
>HPV58\_Alpha\_222386\_nt7201\_Genome\_Tile|1  
GTTTGTATGTTTGTGTATATGTTGTATGTGTTATGTGTCATGTTTGTGTACATGTTCT  
>HPV58\_Alpha\_222386\_nt7261\_Genome\_Tile|1  
ATGTCCTTGTCAGTTTCCTGTTTCTGTATATATGTAATAAACTATTGTGTGTATTGTAAA  
>HPV58\_Alpha\_222386\_nt7341\_Genome\_Tile|1  
TATCTATGAGTAAGGTGCTGTCCCTAAATTGCCCTACCCTGCCCTGCCTATTATGCATAC  
>HPV58\_Alpha\_222386\_nt7361\_Genome\_Tile|1  
TCCCTAAATTGCCCTACCCTGCCCTGCCTATTATGCATACCTATGTAATAGTATTTGTAT  
>HPV58\_Alpha\_222386\_nt7521\_Genome\_Tile|1  
TTAAACTACAATTTAAACAATACAGTTAATCCCTTCCCTTCCTGCACTGCTTTTGCCTAT  
>HPV101\_Unclassified\_109390389\_nt0001\_Genome\_Tile|1  
ATGAGAGGACAAAAGGCAACTATTGGAGATGTAAAGTTAGAACTTAGCCCTTTAGTGCTA  
>HPV101\_Unclassified\_109390389\_nt0021\_Genome\_Tile|1  
TATTGGAGATGTAAAGTTAGAACTTAGCCCTTTAGTGCTACCTGCAAACTTATTATGTGA  
>HPV101\_Unclassified\_109390389\_nt0041\_Genome\_Tile|1  
AACTTAGCCCTTTAGTGCTACCTGCAAACTTATTATGTGATGAATTAGTAACCGAGGAGG  
>HPV101\_Unclassified\_109390389\_nt0101\_Genome\_Tile|1  
AGGAGCAGCAGGACGAGCAAGCTTTAAGCCCTTATAGAATTGTGACAGATTGTGGGCAGT  
>HPV101\_Unclassified\_109390389\_nt0121\_Genome\_Tile|1  
GCTTTAAGCCCTTATAGAATTGTGACAGATTGTGGGCAGTGTACAAAAACCTTAGCATTA  
>HPV101\_Unclassified\_109390389\_nt0161\_Genome\_Tile|1  
GTCACAAAAACCTTAGCATTAACATGTACTAGCTACGGACGGGGCAATAAGGTCTGTGGAAC  
>HPV101\_Unclassified\_109390389\_nt0301\_Genome\_Tile|1  
TACATCCCTCACATTTGTGACTATAATGCAATAGACTTTATTGACGCAGAAGCGGCATG  
>HPV101\_Unclassified\_109390389\_nt0321\_Genome\_Tile|1  
ACTATAATGCAATAGACTTTATTGACGCAGAAGCGGCATGTGAGGAGTTAGACCCTTTGG  
>HPV101\_Unclassified\_109390389\_nt0341\_Genome\_Tile|1  
ATTGACGCAGAAGCGGCATGTGAGGAGTTAGACCCTTTGGAAGCCGTATTGGAAGAAAGT  
>HPV101\_Unclassified\_109390389\_nt0401\_Genome\_Tile|1  
GATGGGACAGATATTTTCAGACCTAATAGACAATACGGAGGAGCCAGATGAGGGAAATTCC  
>HPV101\_Unclassified\_109390389\_nt0421\_Genome\_Tile|1  
CCTAATAGACAATACGGAGGAGCCAGATGAGGGAAATTCCCTAGCATTGTTAAATAAGCA  
>HPV101\_Unclassified\_109390389\_nt0441\_Genome\_Tile|1  
AGCCAGATGAGGGAAATTCCTAGCATTGTTAAATAAGCAGCAGCTAGAGGACGACACGC  
>HPV101\_Unclassified\_109390389\_nt0461\_Genome\_Tile|1  
CTAGCATTGTTAAATAAGCAGCAGCTAGAGGACGACACGCAGCAGCTTAAGATTCTAAAA  
>HPV101\_Unclassified\_109390389\_nt0521\_Genome\_Tile|1  
CGAAAGTACTTTAGTCCTAGCCCAAAGCAACAAGCAGTAATAGATTTGAGCCCAAGACTG  
>HPV101\_Unclassified\_109390389\_nt0541\_Genome\_Tile|1  
CCCAAAGCAACAAGCAGTAATAGATTTGAGCCCAAGACTGCAACAGTTGCGTGTATCGTC  
>HPV101\_Unclassified\_109390389\_nt0581\_Genome\_Tile|1  
CAACAGTTGCGTGTATCGTCCCAAGGATCCAGTAAAAGACGGCTGGTATTTGAGGACAGT  
>HPV101\_Unclassified\_109390389\_nt0721\_Genome\_Tile|1  
GGAGCCCCGAAACCAATGAAGACGTCAGCACAGATGTAGAGACTAGATCTGGGGGGCCATG  
>HPV101\_Unclassified\_109390389\_nt0741\_Genome\_Tile|1  
ACGTCAGCACAGATGTAGAGACTAGATCTGGGGGGCCATGTGGCGGCACAACAACAGTA  
>HPV101\_Unclassified\_109390389\_nt0801\_Genome\_Tile|1  
ACAATAATAGTAACAACAATTGTATAGACCTATTGCATAGTAGTAATAGAGAAGCCACTG  
>HPV101\_Unclassified\_109390389\_nt0821\_Genome\_Tile|1  
TGTATAGACCTATTGCATAGTAGTAATAGAGAAGCCACTGCATATGCAAAATTTAAAGCC  
>HPV101\_Unclassified\_109390389\_nt0861\_Genome\_Tile|1  
CATATGCAAAATTTAAAGCCACATTTGATGTGGGATATAAGGAATTAACAAGACCATTCA

>HPV101\_Unclassified\_109390389\_nt0881\_Genome\_Tile|1  
ACATTTGATGTGGGATATAAGGAATTAACAAGACCATTTCATAAGTAATAAAAGCTGTTGC  
>HPV101\_Unclassified\_109390389\_nt0921\_Genome\_Tile|1  
TAAGTAATAAAAGCTGTTGCTGCAGTTGGATAGCGGGGATATTTGGGGTGGTAGCAGAAA  
>HPV101\_Unclassified\_109390389\_nt1001\_Genome\_Tile|1  
TTACTGCAACCACATTGTGAATACCTGCAAATTATAAATCCAAGCATGGGGACGGGCGTT  
>HPV101\_Unclassified\_109390389\_nt1041\_Genome\_Tile|1  
CAAGCATGGGGACGGGCGTTACAGTAATGATGTTGTTTCAGTTTTATGCTGCAAAATGTC  
>HPV101\_Unclassified\_109390389\_nt1061\_Genome\_Tile|1  
ACAGTAATGATGTTGTTTCAGTTTTATGCTGCAAAATGTCGGGATACTGTAATAAATTTA  
>HPV101\_Unclassified\_109390389\_nt1101\_Genome\_Tile|1  
GGGATACTGTAATAAATTTATTGTGTAATGTATTGCATGTACGGGAATGGCAAATTATAA  
>HPV101\_Unclassified\_109390389\_nt1121\_Genome\_Tile|1  
TTGTGTAATGTATTGCATGTACGGGAATGGCAAATTATAACTAATCCACCAAAGCATAGG  
>HPV101\_Unclassified\_109390389\_nt1141\_Genome\_Tile|1  
ACGGGAATGGCAAATTATAACTAATCCACCAAAGCATAGGAGTGTGCTGTAGCATTATA  
>HPV101\_Unclassified\_109390389\_nt1181\_Genome\_Tile|1  
AGTGTGCTGTAGCATTATACTTTTATAAAACAAGTATGTCTAATGTTAGCTATTGTTAT  
>HPV101\_Unclassified\_109390389\_nt1201\_Genome\_Tile|1  
CTTTTATAAAACAAGTATGTCTAATGTTAGCTATTGTTATGGAGCAATGCCAGAGTGGAT  
>HPV101\_Unclassified\_109390389\_nt1261\_Genome\_Tile|1  
TAAAAAACAAACATTGGTTAATCATCAACAGGAGTCAGACAACCTTTGAATTTGCAACTAT  
>HPV101\_Unclassified\_109390389\_nt1341\_Genome\_Tile|1  
ATAATATTAGAGATGAGGCAGAAGTTGCTTATGGATATGCAAGCCTTGCAGACGACGATA  
>HPV101\_Unclassified\_109390389\_nt1421\_Genome\_Tile|1  
AAATGTAATAATCAATTCAAATATGTAAAAGACTGTGTACAAATGGTTGCAATGTATAAA  
>HPV101\_Unclassified\_109390389\_nt1521\_Genome\_Tile|1  
TGAAATGTGGAGAACGTGTAACAGAAGAAGGCAATTGGAAAAATATTATTAATTTTTTAA  
>HPV101\_Unclassified\_109390389\_nt1581\_Genome\_Tile|1  
AATATCAGGAAATATCTATAGTGGCATTTTTAACAACATTAAGATACTTCCTACAAGGAA  
>HPV101\_Unclassified\_109390389\_nt1601\_Genome\_Tile|1  
GTGGCATTTTTAACAACATTAAGATACTTCCTACAAGGAAGGCCAAAAAAAAAACTGTTTA  
>HPV101\_Unclassified\_109390389\_nt1681\_Genome\_Tile|1  
TACGGGCAAATCAATGTTTTGCTATAGCTTAATAAAATATACCCAAGGTAAGGTGGTATC  
>HPV101\_Unclassified\_109390389\_nt1701\_Genome\_Tile|1  
GCTATAGCTTAATAAAATATACCCAAGGTAAGGTGGTATCGTTTGTAATAGCAGAAGCC  
>HPV101\_Unclassified\_109390389\_nt1881\_Genome\_Tile|1  
TAGATGTAAAGCATAAGGCACCAATACAATTAAACTACCGCCATTACTTCTAACCTCTA  
>HPV101\_Unclassified\_109390389\_nt1921\_Genome\_Tile|1  
GCCATTACTTCTAACCTCTAACATTGAAGTACATGCAGAAGCCCCATTAAAATATTTACA  
>HPV101\_Unclassified\_109390389\_nt1941\_Genome\_Tile|1  
ACATTGAAGTACATGCAGAAGCCCCATTAAAATATTTACATAGCAGAATTCAAGAATACA  
>HPV101\_Unclassified\_109390389\_nt1961\_Genome\_Tile|1  
GCCCCATTAAAATATTTACATAGCAGAATTCAAGAATACAAATTTCCAAATAAATTGCGT  
>HPV101\_Unclassified\_109390389\_nt1981\_Genome\_Tile|1  
TAGCAGAATTCAAGAATACAAATTTCCAAATAAATTGCGTTTAGATGCAAAATGGAAATCC  
>HPV101\_Unclassified\_109390389\_nt2001\_Genome\_Tile|1  
AATTTCCAAATAAATTGCGTTTAGATGCAAAATGGAAATCCAATAATAACAATTACTGATG  
>HPV101\_Unclassified\_109390389\_nt2061\_Genome\_Tile|1  
CAGATTGGAAATCTTTTTTTTAGTAACTGTGGAAGCAATTAGACCTGGGCGATCCAGACG  
>HPV101\_Unclassified\_109390389\_nt2081\_Genome\_Tile|1  
AGTAAACTGTGGAAGCAATTAGACCTGGGCGATCCAGACGACAGCTCAGATGGAGACCCT  
>HPV101\_Unclassified\_109390389\_nt2161\_Genome\_Tile|1  
TGCAAGACAGGCTACTGGGGATTTATGAAGCAGGCCGACAGACATAGATGGACAAATAG  
>HPV101\_Unclassified\_109390389\_nt2181\_Genome\_Tile|1

ATTTATGAAGCAGGCCGCACAGACATAGATGGACAAATAGTACATTGGGACCTTGTAAGG  
>HPV101\_Unclassified\_109390389\_nt2201\_Genome\_Tile|1  
AGACATAGATGGACAAATAGTACATTGGGACCTTGTAAGGCAGGAATATGTATTACTGCA  
>HPV101\_Unclassified\_109390389\_nt2221\_Genome\_Tile|1  
TACATTGGGACCTTGTAAGGCAGGAATATGTATTACTGCACTATGCCAGAAAAACGGTA  
>HPV101\_Unclassified\_109390389\_nt2241\_Genome\_Tile|1  
CAGGAATATGTATTACTGCACTATGCCAGAAAAACGGTATTAGCAATTTGGGCATACAA  
>HPV101\_Unclassified\_109390389\_nt2261\_Genome\_Tile|1  
CTATGCCAGAAAAACGGTATTAGCAATTTGGGCATACAAAAAGTACCGTCATTGGCCAC  
>HPV101\_Unclassified\_109390389\_nt2341\_Genome\_Tile|1  
AGGCTATATTAATGGGCATAGTGCTAAAAAGTCTAAAGAACTCTGCATTTGGAAATGAAC  
>HPV101\_Unclassified\_109390389\_nt2361\_Genome\_Tile|1  
GTGCTAAAAAGTCTAAAGAACTCTGCATTTGGAAATGAACAATGGACATTGACAGATACA  
>HPV101\_Unclassified\_109390389\_nt2421\_Genome\_Tile|1  
AGCTATGAACTGTTTATGACACCTCCATCGCATACATTTAAAAACAAGGAAAAACCATA  
>HPV101\_Unclassified\_109390389\_nt2441\_Genome\_Tile|1  
ACCTCCATCGCATACATTTAAAAACAAGGAAAAACCATAGAGGTGTGGTATGGAAATAA  
>HPV101\_Unclassified\_109390389\_nt2461\_Genome\_Tile|1  
AAAAACAAGGAAAAACCATAGAGGTGTGGTATGGAAATAATGAGGACAATGCAGTGCCAT  
>HPV101\_Unclassified\_109390389\_nt2541\_Genome\_Tile|1  
TATTACCAAGACGCACAGGACAATTGGTACAAGGCCCGTGGACAGGTATCTGCAGACGGC  
>HPV101\_Unclassified\_109390389\_nt2561\_Genome\_Tile|1  
CAATTGGTACAAGGCCCGTGGACAGGTATCTGCAGACGGCCTGTACTATATAGACTGGGA  
>HPV101\_Unclassified\_109390389\_nt2581\_Genome\_Tile|1  
GACAGGTATCTGCAGACGGCCTGTACTATATAGACTGGGAAGGAAATAAACATTTCTATG  
>HPV101\_Unclassified\_109390389\_nt2601\_Genome\_Tile|1  
CTGTACTATATAGACTGGGAAGGAAATAAACATTTCTATGTGCGGTTTGCAGATGAGGCA  
>HPV101\_Unclassified\_109390389\_nt2641\_Genome\_Tile|1  
TGCGGTTTGCAGATGAGGCAACACAATTTGATGCAGCAAATGAATGGCAAGTACGAACTG  
>HPV101\_Unclassified\_109390389\_nt2661\_Genome\_Tile|1  
ACACAATTTGATGCAGCAAATGAATGGCAAGTACGAACTGAAAGTGAAATAATATCTAAT  
>HPV101\_Unclassified\_109390389\_nt2741\_Genome\_Tile|1  
ACGGAGCGACCCGAGGCCTACTGGATCTTCTGCCATCACCTATGAAACTTCCAGACACGA  
>HPV101\_Unclassified\_109390389\_nt2761\_Genome\_Tile|1  
CTGGATCTTCTGCCATCACCTATGAAACTTCCAGACACGACACGAGGAGGACTAGGAGAT  
>HPV101\_Unclassified\_109390389\_nt2801\_Genome\_Tile|1  
CACGAGGAGGACTAGGAGATCTACTAAAAGACCCCGACCGTCCCCAGCCCATCCGCGAC  
>HPV101\_Unclassified\_109390389\_nt2861\_Genome\_Tile|1  
ATCGGCGACCGAAAGCGATACCCCTGGGCACCATACCAGAAGCCGACGAATCCAACAAAG  
>HPV101\_Unclassified\_109390389\_nt2881\_Genome\_Tile|1  
CCCCTGGGCACCATACCAGAAGCCGACGAATCCAACAAAGAAAAACATAAATCCCAACGAC  
>HPV101\_Unclassified\_109390389\_nt2901\_Genome\_Tile|1  
AGCCGACGAATCCAACAAAGAAAAACATAAATCCCAACGACCCAGGTGGGGATCCGAGTCT  
>HPV101\_Unclassified\_109390389\_nt2921\_Genome\_Tile|1  
AAAACATAAATCCCAACGACCCAGGTGGGGATCCGAGTCTCCTATCCAGTCTCCTTCATC  
>HPV101\_Unclassified\_109390389\_nt2961\_Genome\_Tile|1  
CCTATCCAGTCTCCTTCATCAGTGGGGCAAGGACATCGACTGCCTAATAGACACTATCGT  
>HPV101\_Unclassified\_109390389\_nt3041\_Genome\_Tile|1  
AGACGAGGCTAGGGATCCGCCAGTAATACTTATTAAAGGGCCTGCAAATACTACCAAATG  
>HPV101\_Unclassified\_109390389\_nt3101\_Genome\_Tile|1  
TTGGAGGTATAGAATGAAACAAAATTATAGGGCGCTATTTGAAAGTATAAGCACTGCATT  
>HPV101\_Unclassified\_109390389\_nt3121\_Genome\_Tile|1  
AAAATTATAGGGCGCTATTTGAAAGTATAAGCACTGCATTTTCATGGGTAGGTGATAGGG  
>HPV101\_Unclassified\_109390389\_nt3161\_Genome\_Tile|1  
TTCATGGGTAGGTGATAGGGGCTCAGATAGGGTAGGGTGTAGTAGGGTATTAGTAGCATT

>HPV101\_Unclassified\_109390389\_nt3221\_Genome\_Tile|1  
TAGAAATAATAGCCAACGGGAAAGGTTTTTACATACTGTGAAGTTACCAAAGGGTACACA  
>HPV101\_Unclassified\_109390389\_nt3241\_Genome\_Tile|1  
AAAGGTTTTTACATACTGTGAAGTTACCAAAGGGTACACAGTTTTTCATTTGGAAACCTGG  
>HPV101\_Unclassified\_109390389\_nt3261\_Genome\_Tile|1  
AAGTTACCAAAGGGTACACAGTTTTTCATTTGGAAACCTGGAATCCCTGTAACCACACATG  
>HPV101\_Unclassified\_109390389\_nt3281\_Genome\_Tile|1  
GTTTTTCATTTGGAAACCTGGAATCCCTGTAACCACACATGCCAGTAATGCTGCCTATTTG  
>HPV101\_Unclassified\_109390389\_nt3341\_Genome\_Tile|1  
TAAATAGCATCACATCTGCCTCTTGTGATTTTGTGTACCTTGTATATTATACTTCTTTTG  
>HPV101\_Unclassified\_109390389\_nt3401\_Genome\_Tile|1  
TACTGCTTTGCTACACTTGTATAATCAATGGAGCCTCCACATGCACGTAGGCGAAAGCGT  
>HPV101\_Unclassified\_109390389\_nt3421\_Genome\_Tile|1  
ATAATCAATGGAGCCTCCACATGCACGTAGGCGAAAGCGTGACACAGTTGAAAATATATA  
>HPV101\_Unclassified\_109390389\_nt3461\_Genome\_Tile|1  
GACACAGTTGAAAATATATACAGGCATTGTGCCCTGTCTGGTACATGCCCTGATGATGTT  
>HPV101\_Unclassified\_109390389\_nt3521\_Genome\_Tile|1  
AAAAATAAAGTGGAAATAATACCATTGCAGATAGGATATTAAAATGGATTGCAAGTATT  
>HPV101\_Unclassified\_109390389\_nt3681\_Genome\_Tile|1  
GTACTGTACTACGTCCTGGGGTTGTTTTGGATCCTGTAGGACCATCTGATATTGTACCCA  
>HPV101\_Unclassified\_109390389\_nt3701\_Genome\_Tile|1  
GTTGTTTTGGATCCTGTAGGACCATCTGATATTGTACCCATTGATCCTATATCACCTACT  
>HPV101\_Unclassified\_109390389\_nt3721\_Genome\_Tile|1  
ACCATCTGATATTGTACCCATTGATCCTATATCACCTACTGCATCCTCTATTGTTTCCTTT  
>HPV101\_Unclassified\_109390389\_nt3741\_Genome\_Tile|1  
TTGATCCTATATCACCTACTGCATCCTCTATTGTTTCCTTTGGAGACTGTACCTGAAACAC  
>HPV101\_Unclassified\_109390389\_nt3761\_Genome\_Tile|1  
GCATCCTCTATTGTTTCCTTTGGAGACTGTACCTGAAACACAAATACCTGATGTTTCCTGTG  
>HPV101\_Unclassified\_109390389\_nt3821\_Genome\_Tile|1  
CGACCCCTGTTGGAGGTGAATTGGAGGTTACCGTTGGTACTGACCCTGTATCAGATATT  
>HPV101\_Unclassified\_109390389\_nt3861\_Genome\_Tile|1  
CTGACCCTGTATCAGATATTACTATAGAGGCCACCTCGCCTGCTATTACACCCATAGACC  
>HPV101\_Unclassified\_109390389\_nt3901\_Genome\_Tile|1  
TGCTATTACACCCATAGACCCCAAGTGCCGTTATTGAGGCACAACCTCCTACATCTAC  
>HPV101\_Unclassified\_109390389\_nt3921\_Genome\_Tile|1  
CCACAAGTGCCGTTATTGAGGCACAACCTCCTACATCTACTCCTAAGCGTGTTTCAGTAA  
>HPV101\_Unclassified\_109390389\_nt3941\_Genome\_Tile|1  
GCACAACCTCCTACATCTACTCCTAAGCGTGTTTCAGTAACAAGCACACGGCATGTTAAT  
>HPV101\_Unclassified\_109390389\_nt3961\_Genome\_Tile|1  
TCCTAAGCGTGTTTCAGTAACAAGCACACGGCATGTTAATCCTTCTTACATATCGGTATA  
>HPV101\_Unclassified\_109390389\_nt4041\_Genome\_Tile|1  
TAACACAGGCTGGTGCTGAGGTGTTTGTAGGGGCAGCTGTTGGTGAGGGACGGGTATTA  
>HPV101\_Unclassified\_109390389\_nt4061\_Genome\_Tile|1  
GTGTTTGTAGGGGCAGCTGTTGGTGAGGGACGGGTTATTAGTATAGGTGAATCTATACCT  
>HPV101\_Unclassified\_109390389\_nt4161\_Genome\_Tile|1  
CTATTGAGGAGGCTGTTACGCCCCACGGACCAGTACCCCTCGTGTATTCAAAGGGCCT  
>HPV101\_Unclassified\_109390389\_nt4181\_Genome\_Tile|1  
CCCCACGGACCAGTACCCCTCGTGTATTTCAAAGGGCCTTTCAACGTGCACGGGACCTT  
>HPV101\_Unclassified\_109390389\_nt4201\_Genome\_Tile|1  
TCGTGTATTTCAAAGGGCCTTTCAACGTGCACGGGACCTTTATAACAGACGTGTACAACA  
>HPV101\_Unclassified\_109390389\_nt4221\_Genome\_Tile|1  
TTCAACGTGCACGGGACCTTTATAACAGACGTGTACAACAAGTACAAACACACAATATGG  
>HPV101\_Unclassified\_109390389\_nt4461\_Genome\_Tile|1  
TGCGTCTTAGTCGCCTAGGTCGCCGGGGCACTATTGTAACACGCAGTGGATTACAAATAG  
>HPV101\_Unclassified\_109390389\_nt4501\_Genome\_Tile|1

ACGCAGTGGATTACAAATAGGATCCAATGTGCATTTTTATTATGATTTTCAGCTCTATAGA  
>HPV101\_Unclassified\_109390389\_nt4521\_Genome\_Tile|1  
GATCCAATGTGCATTTTTATTATGATTTTCAGCTCTATAGATGCTGGCTCAGTTGAATTGC  
>HPV101\_Unclassified\_109390389\_nt4581\_Genome\_Tile|1  
AACCACCTGGTCAGCAATCTGGGGTGGCCTCTATTGTTGATGGCTTAGCATCTGCTAACA  
>HPV101\_Unclassified\_109390389\_nt4621\_Genome\_Tile|1  
TGGCTTAGCATCTGCTAACATTAATGGCAGTGCTGAAACATCTTTTATAGAAGGTCATAC  
>HPV101\_Unclassified\_109390389\_nt4641\_Genome\_Tile|1  
TTAATGGCAGTGCTGAAACATCTTTTATAGAAGGTCATACACTTGTTGGCCCTACGGGTG  
>HPV101\_Unclassified\_109390389\_nt4661\_Genome\_Tile|1  
TCTTTTATAGAAGGTCATACACTTGTTGGCCCTACGGGTGAGGCTGACTTGTATGACACG  
>HPV101\_Unclassified\_109390389\_nt4681\_Genome\_Tile|1  
ACTTGTGGCCCTACGGGTGAGGCTGACTTGTATGACACGTACTCAGAAGAGTTTGGAAAG  
>HPV101\_Unclassified\_109390389\_nt4701\_Genome\_Tile|1  
AGGCTGACTTGTATGACACGTACTCAGAAGAGTTTGGAAAGTTCTCGATTGTTACTTACAC  
>HPV101\_Unclassified\_109390389\_nt4741\_Genome\_Tile|1  
TTCTCGATTGTTACTTACACCTCAGGCAGTTCCTGCTGTTTCAGGTCCCTCCTTTGGTTCCG  
>HPV101\_Unclassified\_109390389\_nt4781\_Genome\_Tile|1  
CAGGTCCCTCCTTTGGTTTCGTGTCCTGACACTTCCTCCAGGCACAGCCCTACAAATCTTA  
>HPV101\_Unclassified\_109390389\_nt4801\_Genome\_Tile|1  
TGTCTGACACTTCCTCCAGGCACAGCCCTACAAATCTTACTCTCAGATGTAGGGGTCT  
>HPV101\_Unclassified\_109390389\_nt4821\_Genome\_Tile|1  
GCACAGCCCTACAAATCTTACTCTCAGATGTAGGGGTCTTGTACCTTTTTCTGTGCCTT  
>HPV101\_Unclassified\_109390389\_nt4841\_Genome\_Tile|1  
CTCTCAGATGTAGGGGTCTTGTACCTTTTTCTGTGCCTTCTGTACATCCTGTTATTCCT  
>HPV101\_Unclassified\_109390389\_nt4901\_Genome\_Tile|1  
GGCACTGTGTTTCCAGATGTGTCTGAACCTCCTATTGTTGTGGATGGTTTTGATGCATTT  
>HPV101\_Unclassified\_109390389\_nt4921\_Genome\_Tile|1  
GTCTGAACCTCCTATTGTTGTGGATGGTTTTGATGCATTTGATACATTTTATTTGCATCC  
>HPV101\_Unclassified\_109390389\_nt5041\_Genome\_Tile|1  
GTTTGTGGCTACCTCAGACTGGTAAATATACCTACCTCCAGCTCCTCCTGTGTCTAGGA  
>HPV101\_Unclassified\_109390389\_nt5081\_Genome\_Tile|1  
AGCTCCTCCTGTGTCTAGGAGTCTTACCACCGATGAATATGTTGTGGAAACATCTGTATT  
>HPV101\_Unclassified\_109390389\_nt5161\_Genome\_Tile|1  
GTCTAGTAACTGTGGGTACCCCTATTTTCCCGTTATAAAACCAGGCAATCACACCGTTG  
>HPV101\_Unclassified\_109390389\_nt5181\_Genome\_Tile|1  
CCCTATTTTCCCGTTATAAAACCAGGCAATCACACCGTTGAGGTTCTTAAGGTTTCTGGC  
>HPV101\_Unclassified\_109390389\_nt5221\_Genome\_Tile|1  
AGGTTCTTAAGGTTTCTGGCAACCAGTTTAGGGCTTTTCGCCTACGTCTCCAGATCCCA  
>HPV101\_Unclassified\_109390389\_nt5301\_Genome\_Tile|1  
AAACAATTGTATAATGTTGAATCGGAGCGCCTCGTGTGGCGTCTTAGAGGAATTGATATT  
>HPV101\_Unclassified\_109390389\_nt5421\_Genome\_Tile|1  
GATACTGAAAATCCTAATGGATATCAAAAGGGTGGTGCTAAGGACGCTAGACAAAATGTT  
>HPV101\_Unclassified\_109390389\_nt5441\_Genome\_Tile|1  
ATATCAAAAGGGTGGTGCTAAGGACGCTAGACAAAATGTTTCTATGGATCCTAAACAAAC  
>HPV101\_Unclassified\_109390389\_nt5561\_Genome\_Tile|1  
ATGTGACAAAATCCTCCTAAAGGCACCTGTCCTCCTTTACAGTTGGTGTCTCTGTTAT  
>HPV101\_Unclassified\_109390389\_nt5661\_Genome\_Tile|1  
AATTTTGCTGCCTTGACAGGCTGATCACTCAGGGGTACCCCTAGATATTGTTGCAGATACT  
>HPV101\_Unclassified\_109390389\_nt5681\_Genome\_Tile|1  
TGATCACTCAGGGGTACCCCTAGATATTGTTGCAGATACTTGTAATGGCCAGACTTTCT  
>HPV101\_Unclassified\_109390389\_nt5741\_Genome\_Tile|1  
TGGTATGGCCAATGATAGTTTTGGGGATGGTATGTTTTTCTTTGGCCGCCGCGAGCAGGT  
>HPV101\_Unclassified\_109390389\_nt5761\_Genome\_Tile|1  
TTGGGGATGGTATGTTTTTCTTTGGCCGCCGCGAGCAGGTGATGCACGTCATTATTTCA

>HPV101\_Unclassified\_109390389\_nt5861\_Genome\_Tile|1  
GTTTGAGGGTAATGGTAAAAAGTATTTTATTGGTGCTGAGCAAGGCCAGGACCAGCATCA  
>HPV101\_Unclassified\_109390389\_nt5881\_Genome\_Tile|1  
AGTATTTTATTGGTGCTGAGCAAGGCCAGGACCAGCATCAGCTGGCTCCCTCTTTATATT  
>HPV101\_Unclassified\_109390389\_nt5981\_Genome\_Tile|1  
GTTATTTTAGTAGGCCCTACTGGATTGAACGGGCTCAGGGTGCTAATAATGCTGTATTATG  
>HPV101\_Unclassified\_109390389\_nt6001\_Genome\_Tile|1  
GGATTGAACGGGCTCAGGGTGCTAATAATGCTGTATTATGGAATAATAATGTATTTGTTA  
>HPV101\_Unclassified\_109390389\_nt6021\_Genome\_Tile|1  
GCTAATAATGCTGTATTATGGAATAATAATGTATTTGTTACTTTGGTTGATAATACCCAC  
>HPV101\_Unclassified\_109390389\_nt6041\_Genome\_Tile|1  
GAATAATAATGTATTTGTTACTTTGGTTGATAATACCCACAATGTGAATTTTACTATTAA  
>HPV101\_Unclassified\_109390389\_nt6061\_Genome\_Tile|1  
CTTTGGTTGATAATACCCACAATGTGAATTTTACTATTAATGTTGCTACAGAAGATAATA  
>HPV101\_Unclassified\_109390389\_nt6081\_Genome\_Tile|1  
AATGTGAATTTTACTATTAATGTTGCTACAGAAGATAATATTTCAGTCCTATGATTCTGCA  
>HPV101\_Unclassified\_109390389\_nt6101\_Genome\_Tile|1  
TGTTGCTACAGAAGATAATATTTCAGTCCTATGATTCTGCAAAGTACAAGCACTACCTCAG  
>HPV101\_Unclassified\_109390389\_nt6121\_Genome\_Tile|1  
TTCAGTCCTATGATTCTGCAAAGTACAAGCACTACCTCAGACATGTGGAGGAATTTGAAA  
>HPV101\_Unclassified\_109390389\_nt6161\_Genome\_Tile|1  
ACATGTGGAGGAATTTGAAATTTCTCTCATTGTGCAGCTCTGTAAAGTGCTCTTACTCC  
>HPV101\_Unclassified\_109390389\_nt6181\_Genome\_Tile|1  
TTTCTCTCATTGTGCAGCTCTGTAAAGTGCTCTTACTCCCGATGTATTGGCACACATAC  
>HPV101\_Unclassified\_109390389\_nt6201\_Genome\_Tile|1  
TGTAAGTGCTCTTACTCCCGATGTATTGGCACACATACACTTAATGAATCCCTCTATT  
>HPV101\_Unclassified\_109390389\_nt6221\_Genome\_Tile|1  
CGATGTATTGGCACACATACACTTAATGAATCCCTCTATTCTGGATGAATGGCAATTAGG  
>HPV101\_Unclassified\_109390389\_nt6241\_Genome\_Tile|1  
ACTTAATGAATCCCTCTATTCTGGATGAATGGCAATTAGGTATTGCGGCTCCACCGTCTA  
>HPV101\_Unclassified\_109390389\_nt6261\_Genome\_Tile|1  
CTGGATGAATGGCAATTAGGTATTGCGGCTCCACCGTCTACCTCTATTGAAACCACTTAC  
>HPV101\_Unclassified\_109390389\_nt6281\_Genome\_Tile|1  
TATTGCGGCTCCACCGTCTACCTCTATTGAAACCACTTACAGATATATTGATTCTCTTGC  
>HPV101\_Unclassified\_109390389\_nt6341\_Genome\_Tile|1  
TACAATGTGTCCACAGCAGAGCCTCCTAAGGAAAAGGAAGATCCATATGACAAAATGTC  
>HPV101\_Unclassified\_109390389\_nt6401\_Genome\_Tile|1  
TTTTTGGGTGGTTGATTTATCAGACAGAATGTCCTCTGAATTAGGGGCTATCCTCTTGG  
>HPV101\_Unclassified\_109390389\_nt6421\_Genome\_Tile|1  
CAGACAGAATGTCCTCTGAATTAGGGGCTATCCTCTTGGTAGGCGCTTTTTACATCAAA  
>HPV101\_Unclassified\_109390389\_nt6441\_Genome\_Tile|1  
TTAGGGGCTATCCTCTTGGTAGGCGCTTTTTACATCAAACAGGGTCTGCCCGGCCTGCG  
>HPV101\_Unclassified\_109390389\_nt6521\_Genome\_Tile|1  
TCCTTCTACGCCTACCAGGCCTACCTCCAGGTCTTCCAAACGCCGACGCAGGCAAGTTTA  
>HPV101\_Unclassified\_109390389\_nt6581\_Genome\_Tile|1  
AACATTATATGTATTTTACAACATTCCCTACCTCTGTACATTTTACATTCTATACTCTTA  
>HPV101\_Unclassified\_109390389\_nt6641\_Genome\_Tile|1  
TAATAAATAAAGTATGTAGCATGTCAACATTGTCGTTGTATGAGTTATTTCTTCTGACTC  
>HPV101\_Unclassified\_109390389\_nt6681\_Genome\_Tile|1  
TGAGTTATTTCTTCTGACTCAGGGCAGTATTTTGGCCACACCTGGGCTTTTAGTATTTGG  
>HPV101\_Unclassified\_109390389\_nt6821\_Genome\_Tile|1  
TGGTACATTTGCTGCCAATTTTGGCAGCAGGTATGTTTCATGTTTTAACAAATGTATTACT  
>HPV101\_Unclassified\_109390389\_nt6841\_Genome\_Tile|1  
TTGCCAGCAGGTATGTTTCATGTTTTAACAAATGTATTACTCATGTGTTTTGCAACGTTTT  
>HPV101\_Unclassified\_109390389\_nt6861\_Genome\_Tile|1

GTTTTAACAAATGTATTACTCATGTGTTTTGCAACGTTTTAGGTACTGGCTACATTCCAC  
>HPV101\_Unclassified\_109390389\_nt6901\_Genome\_Tile|1  
AGGTACTGGCTACATTCCACAACCGGGAGCGGTGCTTTTACAGTGCTTTTCTCTTATT  
>HPV101\_Unclassified\_109390389\_nt7001\_Genome\_Tile|1  
CGGGAGTGGTGTGGGCAGTGTCTATATATACAGCGGGGGCCTATACAACGGTCCTTTTG  
>HPV101\_Unclassified\_109390389\_nt7041\_Genome\_Tile|1  
CCTATACAACGGTCCTTTTGGCGACCGCTGTGTGCATGTACTGGGAGGTAGACTGGGGAC  
>HPV101\_Unclassified\_109390389\_nt7081\_Genome\_Tile|1  
CTGGGAGGTAGACTGGGGACTGTGTAATGTTATGAATATTGTACCTATATTACTGCTTAT  
>HPV101\_Unclassified\_109390389\_nt7101\_Genome\_Tile|1  
TGTGTAATGTTATGAATATTGTACCTATATTACTGCTTATGTGGCAATTGTATATTTGTG  
>HPV101\_Unclassified\_109390389\_nt7161\_Genome\_Tile|1  
TTGTGTTTTTAATTACTGTGCTTAGCCTTATTAAGATATTTTTATTGTTGGGAATACGGG  
>HPV101\_Unclassified\_109390389\_nt7181\_Genome\_Tile|1  
CTTAGCCTTATTAAGATATTTTTATTGTTGGGAATACGGGTATAGGGACACGGCCAGTTG  
>HPV103\_Unclassified\_109390382\_nt0001\_Genome\_Tile|1  
ATGAGGGGAAAGAAACCAACAATTAAAGATATTAACCTAGAACTACATAGTTTAGTATTA  
>HPV103\_Unclassified\_109390382\_nt0021\_Genome\_Tile|1  
AATTAAAGATATTAACCTTAGAACTACATAGTTTAGTATTACCACAAAATTTACTCTGTGG  
>HPV103\_Unclassified\_109390382\_nt0041\_Genome\_Tile|1  
AACTACATAGTTTAGTATTACCACAAAATTTACTCTGTGGTGAAGAACTTGTGGAGGAGG  
>HPV103\_Unclassified\_109390382\_nt0141\_Genome\_Tile|1  
GGTGGTGACAGATTGCAAGTATTGTGAGAAGTCATTGTGTATGTATGTGGTAGCCACGGA  
>HPV103\_Unclassified\_109390382\_nt0161\_Genome\_Tile|1  
ATTGTGAGAAGTCATTGTGTATGTATGTGGTAGCCACGGAGGAGGGCATTAGAAACTTTG  
>HPV103\_Unclassified\_109390382\_nt0301\_Genome\_Tile|1  
TAAAGGTACATCTTGCTTTACTGACATTACAGCAAATGCTTGTGAGTTTATAGAAACAGA  
>HPV103\_Unclassified\_109390382\_nt0341\_Genome\_Tile|1  
TGTGAGTTTATAGAAACAGAAGCGACCTGTGAGGATGGTTTAGATTTCATTGGAAGCATTA  
>HPV103\_Unclassified\_109390382\_nt0401\_Genome\_Tile|1  
TTTGAAGAGAGCGATGGGACAGATATTCAGAACTAATAGAAAATATTGATGAACCTGAT  
>HPV103\_Unclassified\_109390382\_nt0421\_Genome\_Tile|1  
AGATATTTTCAGAACTAATAGAAAATATTGATGAACCTGATAGGGGGAATCCCCAAGCACT  
>HPV103\_Unclassified\_109390382\_nt0461\_Genome\_Tile|1  
AGGGGGAATCCCCAAGCACTGTTAAATAGGCAACAGCTAGAAGAAGACAGTCAGCTACTA  
>HPV103\_Unclassified\_109390382\_nt0541\_Genome\_Tile|1  
TGTTAGTCCTAGCCCGAAGCAGCGGGTAATAGATTTAAGCCACGACTTGAAGCGCTGTG  
>HPV103\_Unclassified\_109390382\_nt0561\_Genome\_Tile|1  
AGCGGGTAATAGATTTAAGCCCACGACTTGAAGCGCTGTGTGTGTCGCCACGAGGATCCA  
>HPV103\_Unclassified\_109390382\_nt0581\_Genome\_Tile|1  
CCACGACTTGAAGCGCTGTGTGTGTCGCCACGAGGATCCAGCAGTAAAAAGACGACTATTT  
>HPV103\_Unclassified\_109390382\_nt0701\_Genome\_Tile|1  
TCGGAGGCATTGACTAATTCAGGGACATTGACTAATGGGGATGAAAATGCTGTATGTGCA  
>HPV103\_Unclassified\_109390382\_nt0721\_Genome\_Tile|1  
AGGGACATTGACTAATGGGGATGAAAATGCTGTATGTGCAACGCAGGATGGCGACACACG  
>HPV103\_Unclassified\_109390382\_nt0741\_Genome\_Tile|1  
ATGAAAATGCTGTATGTGCAACGCAGGATGGCGACACACGGTGCTTGGATATTTTACACA  
>HPV103\_Unclassified\_109390382\_nt0861\_Genome\_Tile|1  
AGGAAATAACCAGGCCATTTCAAAGTAATAAGTCATGTTGTCATAGCTGGGTAGCAGCAA  
>HPV103\_Unclassified\_109390382\_nt0881\_Genome\_Tile|1  
CAAAGTAATAAGTCATGTTGTCATAGCTGGGTAGCAGCAATATTTGGTGTGTAGCAGAA  
>HPV103\_Unclassified\_109390382\_nt0901\_Genome\_Tile|1  
TCATAGCTGGGTAGCAGCAATATTTGGTGTGTAGCAGAAATGTTGGAAGCGGCTAAGAC  
>HPV103\_Unclassified\_109390382\_nt0921\_Genome\_Tile|1  
TATTTGGTGTGTAGCAGAAATGTTGGAAGCGGCTAAGACGCTATTTAAAGTGCATTGTG



>HPV103\_Unclassified\_109390382\_nt0941\_Genome\_Tile|1  
ATGTTGGAAGCGGCTAAGACGCTATTTAAAGTGCATTGTGATTATTTACAAATTATTAAT  
>HPV103\_Unclassified\_109390382\_nt0961\_Genome\_Tile|1  
GCTATTTAAAGTGCATTGTGATTATTTACAAATTATTAATCCTAGTATGGGTACAGGAGT  
>HPV103\_Unclassified\_109390382\_nt0981\_Genome\_Tile|1  
ATTATTTACAAATTATTAATCCTAGTATGGGTACAGGAGTTACTGTATTATGCTTGTGTTG  
>HPV103\_Unclassified\_109390382\_nt1001\_Genome\_Tile|1  
CCTAGTATGGGTACAGGAGTTACTGTATTATGCTTGTGTTGAGTTTTCAAGTTCTAAATGT  
>HPV103\_Unclassified\_109390382\_nt1021\_Genome\_Tile|1  
TACTGTATTATGCTTGTGTTGAGTTTTCAAGTTCTAAATGTAGAGATACTGTACAAAACT  
>HPV103\_Unclassified\_109390382\_nt1041\_Genome\_Tile|1  
AGTTTTCAAGTTCTAAATGTAGAGATACTGTACAAAACTGATTAGCAATGTGCTAAACG  
>HPV103\_Unclassified\_109390382\_nt1061\_Genome\_Tile|1  
AGAGATACTGTACAAAACTGATTAGCAATGTGCTAAACGTGCAGGAACATCAAATAATA  
>HPV103\_Unclassified\_109390382\_nt1101\_Genome\_Tile|1  
TGCAGGAACATCAAATAATAACAGATCCTCCGCGACATAGAAGTGTACCAGTAGCATTGT  
>HPV103\_Unclassified\_109390382\_nt1141\_Genome\_Tile|1  
AAGTGTACCAGTAGCATTGTTTTTTTATAAACAAAGCATGTCTAATACAAGTTTTGTACA  
>HPV103\_Unclassified\_109390382\_nt1221\_Genome\_Tile|1  
TTAAAAGACAAACTATGCTAAACCACCAGCAGGAGGCAGACTCATTTGAAGTGTCTCATA  
>HPV103\_Unclassified\_109390382\_nt1341\_Genome\_Tile|1  
CATGTTTAGCAGATGTGGAACCAAATGCAGCAGCATGGCTAAAAAGCAACCAGCAATATA  
>HPV103\_Unclassified\_109390382\_nt1381\_Genome\_Tile|1  
AAAAAGCAACCAGCAATATAAGTATGTGTCAGATTGTGCAAAAATGGTTAGAATGTACAA  
>HPV103\_Unclassified\_109390382\_nt1401\_Genome\_Tile|1  
AGTATGTGTCAGATTGTGCAAAAATGGTTAGAATGTACAAAAAGTATGAAATGCAACAAA  
>HPV103\_Unclassified\_109390382\_nt1441\_Genome\_Tile|1  
AAAGTATGAAATGCAACAAATGAGTATGGCAGTGGATAAAAAAATGTGGAGAGCATAT  
>HPV103\_Unclassified\_109390382\_nt1481\_Genome\_Tile|1  
AAAAAATGTGGAGAGCATATAGAAACAGACGGAGACTGGAAAAAATTATAAACCTATTA  
>HPV103\_Unclassified\_109390382\_nt1521\_Genome\_Tile|1  
AAAAAATTATAAACCTATTAATAATATCAGGAAATATCAGTAATAGCATTTTTTAACAAGTT  
>HPV103\_Unclassified\_109390382\_nt1541\_Genome\_Tile|1  
AAATATCAGGAAATATCAGTAATAGCATTTTTTAACAAGTTTTTAGAATGTTTTTAAAGGGA  
>HPV103\_Unclassified\_109390382\_nt1581\_Genome\_Tile|1  
TTAGAATGTTTTTAAAGGGACAACCAAGAAAAACTGTATAGCACTATGGGGACCTCCAG  
>HPV103\_Unclassified\_109390382\_nt1761\_Genome\_Tile|1  
TTATAGACGATGCTACATTTCCATGTTTCCAATTTATGGATGTGTATATGAGAAGTGCTT  
>HPV103\_Unclassified\_109390382\_nt1781\_Genome\_Tile|1  
CCATGTTTCCAATTTATGGATGTGTATATGAGAAGTGCTTTAGATGGAAACGAGGTGTCT  
>HPV103\_Unclassified\_109390382\_nt1821\_Genome\_Tile|1  
TAGATGGAAACGAGGTGTCTGTGGATTGTAAGCATAGGTTACCAGTGCAAAATTAAATTAC  
>HPV103\_Unclassified\_109390382\_nt1881\_Genome\_Tile|1  
CTCCATTACTTGTTACCTCCAACATAGATATGCATTCCGAGGCCTCTTTAAAATACCTGC  
>HPV103\_Unclassified\_109390382\_nt1901\_Genome\_Tile|1  
AACATAGATATGCATTCCGAGGCCTCTTTAAAATACCTGCAGAGTAGAATTACAAGTTTT  
>HPV103\_Unclassified\_109390382\_nt1921\_Genome\_Tile|1  
GGCCTCTTTAAAATACCTGCAGAGTAGAATTACAAGTTTTAAGTTTCCACATAAACTTCC  
>HPV103\_Unclassified\_109390382\_nt2041\_Genome\_Tile|1  
TAGCAAGCTGGAGCAGCAGTTAGACCTTTGTGACCCAGAAGACAGTACAAATGGAGACCC  
>HPV103\_Unclassified\_109390382\_nt2121\_Genome\_Tile|1  
GTCCAAGAGAACTACTGGGGCTTTATGAGGCCGACGCTCAGACCTGGAATCCCAAATA  
>HPV103\_Unclassified\_109390382\_nt2141\_Genome\_Tile|1  
GCTTTATGAGGCCGACGCTCAGACCTGGAATCCCAAATACAACACTGGGATCTTGTAAG  
>HPV103\_Unclassified\_109390382\_nt2161\_Genome\_Tile|1

CAGACCTGGAATCCCAAATACAACACTGGGATCTTGTAAAGGCAGGAGCATGTACTGCTAA  
>HPV103\_Unclassified\_109390382\_nt2221\_Genome\_Tile|1  
ACTATGCCAGAAGGCAGGGCATACAAACATTGGGCCTACAAAAAGTGCCCCCATTGGCAG  
>HPV103\_Unclassified\_109390382\_nt2261\_Genome\_Tile|1  
AAAAGTGCCCCCATTGGCAGCATCTGAAAGCAAAGCCAAAAGCTATTATGATGCAGTT  
>HPV103\_Unclassified\_109390382\_nt2321\_Genome\_Tile|1  
GGTGCTGAAAAGCCTAAAGAAATCCCAATATGGGCAGGAACCATGGACATTAACAGATAC  
>HPV103\_Unclassified\_109390382\_nt2341\_Genome\_Tile|1  
AATCCCAATATGGGCAGGAACCATGGACATTAACAGATACAAGCCATGAACTATTTACCA  
>HPV103\_Unclassified\_109390382\_nt2421\_Genome\_Tile|1  
AAAAAAGGAGGTGTAAGTGTGGAAGTGTATTTGACAACGAGGAAGAAAAAGCTATGCCA  
>HPV103\_Unclassified\_109390382\_nt2441\_Genome\_Tile|1  
GGAAGTGTATTTGACAACGAGGAAGAAAAAGCTATGCCATATACACTATGGAGACTAAT  
>HPV103\_Unclassified\_109390382\_nt2481\_Genome\_Tile|1  
TATACACTATGGAGACTAATATATTATCAAGATGCAGATGAGCTGTGGCATAAAACACAT  
>HPV103\_Unclassified\_109390382\_nt2521\_Genome\_Tile|1  
AGCTGTGGCATAAAACACATGGACAGGTAGACGCGGATGGCCTGTACTTTATAGACATGG  
>HPV103\_Unclassified\_109390382\_nt2541\_Genome\_Tile|1  
GGACAGGTAGACGCGGATGGCCTGTACTTTATAGACATGGTAAAGCAAAAACACTATTAT  
>HPV103\_Unclassified\_109390382\_nt2561\_Genome\_Tile|1  
CCTGTACTTTATAGACATGGTAAAGCAAAAACACTATTATGTGCATTTTACCAAGGAAGC  
>HPV103\_Unclassified\_109390382\_nt2581\_Genome\_Tile|1  
TAAAGCAAAAACACTATTATGTGCATTTTACCAAGGAAGCAGTAAAATATGGACAAAAAG  
>HPV103\_Unclassified\_109390382\_nt2601\_Genome\_Tile|1  
GTGCATTTTACCAAGGAAGCAGTAAAATATGGACAAAAAGGGATGTGGCAAGTGAGGACT  
>HPV103\_Unclassified\_109390382\_nt2621\_Genome\_Tile|1  
AGTAAAATATGGACAAAAAGGGATGTGGCAAGTGAGGACTGGAAGTATGTATTATTTGG  
>HPV103\_Unclassified\_109390382\_nt2701\_Genome\_Tile|1  
CTTCGACGGGGCCGAGCAAGGTGACACCACCGCACAAAGTCACCCGAAGCGCCAGAAAAG  
>HPV103\_Unclassified\_109390382\_nt2721\_Genome\_Tile|1  
GGTGACACCACCGCACAAAGTCACCCGAAGCGCCAGAAAAGGCAAACGACGAAGACATTCC  
>HPV103\_Unclassified\_109390382\_nt2761\_Genome\_Tile|1  
GCAAACGACGAAGACATTCCAGAAGGCAAACCCCTCGACCACCTCGACGACCACAGAGA  
>HPV103\_Unclassified\_109390382\_nt2781\_Genome\_Tile|1  
AGAAGGCAAACCCCTCGACCACCTCGACGACCACAGAGACCGACTCAGAGGATTCCGGCT  
>HPV103\_Unclassified\_109390382\_nt2921\_Genome\_Tile|1  
TACTGACACTGCTGCAGCAGTGGGATCGCGACATCGAAGCCCTGATAGAACTATCCGTC  
>HPV103\_Unclassified\_109390382\_nt2941\_Genome\_Tile|1  
TGGGATCGCGACATCGAAGCCCTGATAGAACTATCCGTCAGACTTGCAAGGCTACAAG  
>HPV103\_Unclassified\_109390382\_nt3021\_Genome\_Tile|1  
ATATTATTAGTTAAAGGGCCTTCAAATACATTGAAATGTTGGAGGTACAGGTGTAGAATA  
>HPV103\_Unclassified\_109390382\_nt3041\_Genome\_Tile|1  
TTCAAATACATTGAAATGTTGGAGGTACAGGTGTAGAATAAAATATAGAGGCTTATTTCA  
>HPV103\_Unclassified\_109390382\_nt3061\_Genome\_Tile|1  
GGAGGTACAGGTGTAGAATAAAATATAGAGGCTTATTTCAAGTGTATTAGCACAGCTTTTA  
>HPV103\_Unclassified\_109390382\_nt3081\_Genome\_Tile|1  
AAATATAGAGGCTTATTTCAAGTGTATTAGCACAGCTTTTACATGGGTGGCGGATGCGGGT  
>HPV103\_Unclassified\_109390382\_nt3101\_Genome\_Tile|1  
GTGTATTAGCACAGCTTTTACATGGGTGGCGGATGCGGGTCCACAATTAGGAAATGCTAG  
>HPV103\_Unclassified\_109390382\_nt3141\_Genome\_Tile|1  
CCACAATTAGGAAATGCTAGAATAATAGTAGGATTTACTAATACATCACAAAGGAAAAG  
>HPV103\_Unclassified\_109390382\_nt3201\_Genome\_Tile|1  
TTTATACAAACTGTGAAATTACCTAAAGGCACAAGTAGTGCATTAGGAAACCTTGATTCA  
>HPV103\_Unclassified\_109390382\_nt3241\_Genome\_Tile|1  
CATTAGGAAACCTTGATTCATTTTAAGCCAATAATGCTGCCAATGGTCCCTGTATATTA

>HPV103\_Unclassified\_109390382\_nt3261\_Genome\_Tile|1  
TTTTAAGCCAATAATGCTGCCAATGGTCCCCTGTATATTATCCTAACCCCTACATAGGTA  
>HPV103\_Unclassified\_109390382\_nt3301\_Genome\_Tile|1  
TCCTAACCCCTACATAGGTATAAGTGTATGTACTATATATGTTGTAAATAGCTTACATGG  
>HPV103\_Unclassified\_109390382\_nt3321\_Genome\_Tile|1  
TAAGTGTATGTACTATATATGTTGTAAATAGCTTACATGGATGTACAACCGAAAAAGCGA  
>HPV103\_Unclassified\_109390382\_nt3361\_Genome\_Tile|1  
ATGTACAACCGAAAAAGCGACAAAAACGGGATACTGTGGAAAATATATATAAACATTGTG  
>HPV103\_Unclassified\_109390382\_nt3381\_Genome\_Tile|1  
CAAAAACGGGATACTGTGGAAAATATATATAAACATTGTGCAGGGTCAGGCACATGTCCT  
>HPV103\_Unclassified\_109390382\_nt3441\_Genome\_Tile|1  
GAGGATGTTAAAAATAAAGTAGAGCAAACAACATTAGCAGACAACTGTTAAAATGGATT  
>HPV103\_Unclassified\_109390382\_nt3461\_Genome\_Tile|1  
AGAGCAAACAACATTAGCAGACAACTGTTAAAATGGATTGCCAGTGTGGTTTACTTTGG  
>HPV103\_Unclassified\_109390382\_nt3561\_Genome\_Tile|1  
TCTGGCTATGTTCCCATTTGGGTCGGGGTCTGCAGGTGGGGTTCGGGTAACATCACAGGGT  
>HPV103\_Unclassified\_109390382\_nt3621\_Genome\_Tile|1  
ACTGTAGTACGTCCGGGTGTTGTGGTAGATCCTATTGGGCCTCCTGATATAGTTCCTATA  
>HPV103\_Unclassified\_109390382\_nt3641\_Genome\_Tile|1  
TGTGGTAGATCCTATTGGGCCTCCTGATATAGTTCCTATAGATGCAGTTACACCACAGTC  
>HPV103\_Unclassified\_109390382\_nt3661\_Genome\_Tile|1  
CTCCTGATATAGTTCCTATAGATGCAGTTACACCACAGTCCTCCTCTGTGGTACCATTAG  
>HPV103\_Unclassified\_109390382\_nt3681\_Genome\_Tile|1  
GATGCAGTTACACCACAGTCCTCCTCTGTGGTACCATTAGAGGTAATACCTGAGATTGTT  
>HPV103\_Unclassified\_109390382\_nt3701\_Genome\_Tile|1  
CTCCTCTGTGGTACCATTAGAGGTAATACCTGAGATTGTTGGCGACCCTACGCCCCCTGA  
>HPV103\_Unclassified\_109390382\_nt3721\_Genome\_Tile|1  
AGGTAATACCTGAGATTGTTGGCGACCCTACGCCCCCTGATATATCTACTCCTAATATTA  
>HPV103\_Unclassified\_109390382\_nt3741\_Genome\_Tile|1  
GGCGACCCTACGCCCCCTGATATATCTACTCCTAATATTATTACTGTAACAGATCCTGTA  
>HPV103\_Unclassified\_109390382\_nt3761\_Genome\_Tile|1  
TATATCTACTCCTAATATTATTACTGTAACAGATCCTGTATCTGACATAACACTAGACAC  
>HPV103\_Unclassified\_109390382\_nt3801\_Genome\_Tile|1  
TCTGACATAACACTAGACACCACCTCTCCTGCTGTTGCTACTATTGACCCCACCAGTGCT  
>HPV103\_Unclassified\_109390382\_nt3821\_Genome\_Tile|1  
CACCTCTCCTGCTGTTGCTACTATTGACCCCACCAGTGCTATACTGGAGGTGCAGCCCAC  
>HPV103\_Unclassified\_109390382\_nt3861\_Genome\_Tile|1  
ATACTGGAGGTGCAGCCCCTGCATCAACACCTAAAAGGGTCTCTGTAGGCAGTAGCAGA  
>HPV103\_Unclassified\_109390382\_nt3881\_Genome\_Tile|1  
TGCATCAACACCTAAAAGGGTCTCTGTAGGCAGTAGCAGACATGTTACGCCATCATACAT  
>HPV103\_Unclassified\_109390382\_nt3901\_Genome\_Tile|1  
TCTCTGTAGGCAGTAGCAGACATGTTACGCCATCATACTCTCTGTATATGGGCATCCTA  
>HPV103\_Unclassified\_109390382\_nt3921\_Genome\_Tile|1  
CATGTTACGCCATCATACTCTCTGTATATGGGCATCCTACAGACCCTGTTACACAATCT  
>HPV103\_Unclassified\_109390382\_nt3981\_Genome\_Tile|1  
GCAGCTGAGGTGTTTATAGGGGGTGTCTGTAAACAGAAGGATCTGTTGTCAATATTGGGGAA  
>HPV103\_Unclassified\_109390382\_nt4021\_Genome\_Tile|1  
CTGTTGTCAATATTGGGGAATCTATACCATTAGAAACATTTGTGGAAACACAGGGGTCTG  
>HPV103\_Unclassified\_109390382\_nt4041\_Genome\_Tile|1  
TCTATACCATTAGAAACATTTGTGGAAACACAGGGGTCTGCCACATTTGATATTCAACCT  
>HPV103\_Unclassified\_109390382\_nt4061\_Genome\_Tile|1  
TGTGGAAACACAGGGGTCTGCCACATTTGATATTCAACCTACTGCAGAGCCACCACGTAC  
>HPV103\_Unclassified\_109390382\_nt4081\_Genome\_Tile|1  
CCACATTTGATATTCAACCTACTGCAGAGCCACCACGTACTAGTACCCCTCGGGCATTTTC  
>HPV103\_Unclassified\_109390382\_nt4121\_Genome\_Tile|1

TAGTACCCCTCGGGCATTTCAAAGAGCATTCCAAAGGGCTCGTGAATTATATAATAGGCG  
>HPV103\_Unclassified\_109390382\_nt4141\_Genome\_Tile|1  
AAAGAGCATTCCAAAGGGCTCGTGAATTATATAATAGGCGGGTTCAACAAGTTAGAACTA  
>HPV103\_Unclassified\_109390382\_nt4161\_Genome\_Tile|1  
CGTGAATTATATAATAGGCGGGTTCAACAAGTTAGAACTAGGAACATAGATTTTCCTAAAC  
>HPV103\_Unclassified\_109390382\_nt4181\_Genome\_Tile|1  
GGTTCAACAAGTTAGAACTAGGAACATAGATTTCCCTAAACCGCCACGACAGGCGGTAC  
>HPV103\_Unclassified\_109390382\_nt4201\_Genome\_Tile|1  
GGAACATAGATTTTCCTAAACCGCCACGACAGGCGGTACTTTTCAATTTGAAAATCCCG  
>HPV103\_Unclassified\_109390382\_nt4281\_Genome\_Tile|1  
CTTGTATTTGAACAGGATTTAAATGCCTTAGCTACTGCTGCACCAGATCCTGATTTTGCT  
>HPV103\_Unclassified\_109390382\_nt4381\_Genome\_Tile|1  
CTGAAGGCCACATTAGACTAAGCAGGTTGGGTCAACGTGGCACTATTCGTACAAGAAGTG  
>HPV103\_Unclassified\_109390382\_nt4521\_Genome\_Tile|1  
GGTCAGCATTCGGTGACACAGGTATTATTGATGCAGCAACAGCACAATCTATTGTTGCA  
>HPV103\_Unclassified\_109390382\_nt4541\_Genome\_Tile|1  
AGGTATTATTGATGCAGCAACAGCACAATCTATTGTTGCAGACACAGCTGAATCTAGTTT  
>HPV103\_Unclassified\_109390382\_nt4601\_Genome\_Tile|1  
TATAGAAGGTCAAACATTAATAGGCCCACAGCTAGACAATGAGCTGCTTGATTCTACAAC  
>HPV103\_Unclassified\_109390382\_nt4661\_Genome\_Tile|1  
CGAGGATTTTAGCTCCTCTCGTCTCCGATTTGCAGGGGTTACCATGGCATCCAGTTTCC  
>HPV103\_Unclassified\_109390382\_nt4681\_Genome\_Tile|1  
GTCTCCGATTTGCAGGGGTTACCATGGCATCCAGTTTCCCTCTTTAGATATTGTTACTT  
>HPV103\_Unclassified\_109390382\_nt4721\_Genome\_Tile|1  
CTCTTTAGATATTGTTACTTTACCACCTGGTGCTGCATTACAATTTGTTGTCACCTGCATC  
>HPV103\_Unclassified\_109390382\_nt4761\_Genome\_Tile|1  
CAATTTGTTGTCACCTGCATCCGCTGGTAAACATAATACTACAACCTATTATTCCACAATAT  
>HPV103\_Unclassified\_109390382\_nt4781\_Genome\_Tile|1  
CGCTGGTAAACATAATACTACAACCTATTATTCCACAATATATCCCCACTACACCTTTTAT  
>HPV103\_Unclassified\_109390382\_nt4801\_Genome\_Tile|1  
CAACTATTATTCCACAATATATCCCCACTACACCTTTTATTCTTCTGTGGTAGTAGATT  
>HPV103\_Unclassified\_109390382\_nt5021\_Genome\_Tile|1  
ATGAATACGTTGTGGAAACGTCTATTTTCTTCCATGCCTCCAGCGACCGCTGCTTACTG  
>HPV103\_Unclassified\_109390382\_nt5081\_Genome\_Tile|1  
TAGGACACCCATATTTTCCAATTACAAAAGTGGGTGAAGGTACAATTGTTGTACCTAAGG  
>HPV103\_Unclassified\_109390382\_nt5101\_Genome\_Tile|1  
ATTACAAAAGTGGGTGAAGGTACAATTGTTGTACCTAAGGTATCTGGTAATCAATTCAGG  
>HPV103\_Unclassified\_109390382\_nt5121\_Genome\_Tile|1  
TACAATTGTTGTACCTAAGGTATCTGGTAATCAATTCAGGGCCTTTCACATCCTTTTACC  
>HPV103\_Unclassified\_109390382\_nt5141\_Genome\_Tile|1  
TATCTGGTAATCAATTCAGGGCCTTTCACATCCTTTTACCTGATCCTAACAAGTTGGCAC  
>HPV103\_Unclassified\_109390382\_nt5161\_Genome\_Tile|1  
GCCTTTCACATCCTTTTACCTGATCCTAACAAGTTGGCACTTGTGGATTCCAATATATAT  
>HPV103\_Unclassified\_109390382\_nt5181\_Genome\_Tile|1  
TGATCCTAACAAGTTGGCACTTGTGGATTCCAATATATATAATGCCGAGTCAGAACGGCT  
>HPV103\_Unclassified\_109390382\_nt5201\_Genome\_Tile|1  
TTGTGGATTCCAATATATATAATGCCGAGTCAGAACGGCTTGTTTGAAGTTACGGGGTC  
>HPV103\_Unclassified\_109390382\_nt5221\_Genome\_Tile|1  
AATGCCGAGTCAGAACGGCTTGTTTGAAGTTACGGGGTCTGGATATTGGTCGTGGTGGA  
>HPV103\_Unclassified\_109390382\_nt5241\_Genome\_Tile|1  
TGTTTGAAGTTACGGGGTCTGGATATTGGTCGTGGTGACCCCTTAGCGTTGGCTCTTC  
>HPV103\_Unclassified\_109390382\_nt5261\_Genome\_Tile|1  
TGGATATTGGTCGTGGTGACCCCTTAGCGTTGGCTCTTCTGGACACCCCTTATTTAATA  
>HPV103\_Unclassified\_109390382\_nt5301\_Genome\_Tile|1  
TGGACACCCCTTATTTAATAAACTTAAGGATACTGAAAATCCTAATAGTTATGTTAAAAAC

>HPV103\_Unclassified\_109390382\_nt5321\_Genome\_Tile|1  
AACTTAAGGATACTGAAAATCCTAATAGTTATGTTAAAACAGGAAAGGAAAACAGACAAA  
>HPV103\_Unclassified\_109390382\_nt5341\_Genome\_Tile|1  
CCTAATAGTTATGTTAAAACAGGAAAGGAAAACAGACAAAGTGTCTCTATGGACCCAAAG  
>HPV103\_Unclassified\_109390382\_nt5361\_Genome\_Tile|1  
AGGAAAGGAAAACAGACAAAGTGTCTCTATGGACCCAAAGCAAACCTCAGCTATTTGTAGT  
>HPV103\_Unclassified\_109390382\_nt5561\_Genome\_Tile|1  
GTGCAATGAATTTTGCTACATTGCAGGAGGACCATTTCAGGTGTACCCCTTGACATTGTAG  
>HPV103\_Unclassified\_109390382\_nt5581\_Genome\_Tile|1  
TTGCAGGAGGACCATTTCAGGTGTACCCCTTGACATTGTAGCTTCTAAATGTAAATGGCCT  
>HPV103\_Unclassified\_109390382\_nt5641\_Genome\_Tile|1  
GATTTTCTTAGAATGGCAAATGACACATATGGCAATCAAATGTTTTCTTTGGAAGACGT  
>HPV103\_Unclassified\_109390382\_nt5661\_Genome\_Tile|1  
TGACACATATGGCAATCAAATGTTTTCTTTGGAAGACGTGAGCAGTTGTATGCTCGCCA  
>HPV103\_Unclassified\_109390382\_nt5721\_Genome\_Tile|1  
CTTTTTTGTAGGGATGGTGTTCATGGGCGACAGTATACCTGAGGCTGAATTTGAGGGTGT  
>HPV103\_Unclassified\_109390382\_nt5741\_Genome\_Tile|1  
TCATGGGCGACAGTATACCTGAGGCTGAATTTGAGGGTGTAAAGCACACCTATATTTTAC  
>HPV103\_Unclassified\_109390382\_nt5781\_Genome\_Tile|1  
TAAGCACACCTATATTTTACAGGGGGCGTCTGACAAAGACCAAATACAGCCTCCTCGTC  
>HPV103\_Unclassified\_109390382\_nt5821\_Genome\_Tile|1  
CAAAATACAGCCTCCTCGTCTGTTTACTATGCAACCCCCAGTGGATCACTGGTTTCTAGT  
>HPV103\_Unclassified\_109390382\_nt5841\_Genome\_Tile|1  
TGTTTTACTATGCAACCCCCAGTGGATCACTGGTTTCTAGTGATTCTCAGTTGTTTGGCAG  
>HPV103\_Unclassified\_109390382\_nt5901\_Genome\_Tile|1  
ACCATACTGGATACAAAAGGCTCAGGGCCCTAATAATAGTGTGTGTTGGAGAAATAATTT  
>HPV103\_Unclassified\_109390382\_nt5961\_Genome\_Tile|1  
ATTTATTACATTGGTTGATAACACACACAATGTAAATTTTACAATAAATGTAAAGTCAGA  
>HPV103\_Unclassified\_109390382\_nt6061\_Genome\_Tile|1  
CATTATCTGCGACATGTAGAGGAATTTGAGATTGCTCTTATATTGCAATTATGCAAGGTT  
>HPV103\_Unclassified\_109390382\_nt6081\_Genome\_Tile|1  
GGAATTTGAGATTGCTCTTATATTGCAATTATGCAAGGTTCTCTCACAGCTGATGTATT  
>HPV103\_Unclassified\_109390382\_nt6101\_Genome\_Tile|1  
TATTGCAATTATGCAAGGTTCTCTCACAGCTGATGTATTAGCCCATATACATGTAATGG  
>HPV103\_Unclassified\_109390382\_nt6121\_Genome\_Tile|1  
CCTCTCACAGCTGATGTATTAGCCCATATACATGTAATGGATCCAGCTATAATTGAGGAC  
>HPV103\_Unclassified\_109390382\_nt6141\_Genome\_Tile|1  
AGCCCATATACATGTAATGGATCCAGCTATAATTGAGGACTGGCAGCTAGGGTTTGTACC  
>HPV103\_Unclassified\_109390382\_nt6161\_Genome\_Tile|1  
ATCCAGCTATAATTGAGGACTGGCAGCTAGGGTTTGTACCACCGCCTCCTTCTTCTATTG  
>HPV103\_Unclassified\_109390382\_nt6181\_Genome\_Tile|1  
TGGCAGCTAGGGTTTGTACCACCGCCTCCTTCTTCTATTGGAGATACATACAGATTTTTTA  
>HPV103\_Unclassified\_109390382\_nt6201\_Genome\_Tile|1  
ACCGCCTCCTTCTTCTATTGGAGATACATACAGATTTTTTAACATCTTTAGCCACACGCTG  
>HPV103\_Unclassified\_109390382\_nt6241\_Genome\_Tile|1  
ACATCTTTAGCCACACGCTGCCCTGCTGCAGAACCTCCCAAGGAAAAACAGGACCCATAT  
>HPV103\_Unclassified\_109390382\_nt6341\_Genome\_Tile|1  
TGTCTCTGATCTTGACAGATATCCTTTGGGTCGAGATTTTTATCTCAAACCTGGGGTTA  
>HPV103\_Unclassified\_109390382\_nt6361\_Genome\_Tile|1  
TATCCTTTGGGTCGAGATTTTTATCTCAAACCTGGGGTTAGCTCGTCTTCTACCTCCTCT  
>HPV103\_Unclassified\_109390382\_nt6401\_Genome\_Tile|1  
GCTCGTCTTCTACCTCCTCTAGAAAGCGGTCTCGTGTAGAGACCCCTACCCGCCAGTAC  
>HPV103\_Unclassified\_109390382\_nt6421\_Genome\_Tile|1  
AGAAAGCGGTCTCGTGTAGAGACCCCTACCCGCCAGTACGGTCTGCTAAAAAACGTAGA  
>HPV103\_Unclassified\_109390382\_nt6481\_Genome\_Tile|1

CGGGGGGTTTAATCTATGGCATTACCTGTGTTGCACATGCACTTTATATTTTTGTTCTTG  
>HPV103\_Unclassified\_109390382\_nt6501\_Genome\_Tile|1  
ATTACCTGTGTTGCACATGCACTTTATATTTTTGTTCTTGTATCAACTGCAGTACTGTGT  
>HPV103\_Unclassified\_109390382\_nt6521\_Genome\_Tile|1  
ACTTTATATTTTTGTTCTTGTATCAACTGCAGTACTGTGTTAACTTGTCTTGTACATTCC  
>HPV103\_Unclassified\_109390382\_nt6541\_Genome\_Tile|1  
TATCAACTGCAGTACTGTGTTAACTTGTCTTGTACATTCTTAACCTATATTACATTTAA  
>HPV103\_Unclassified\_109390382\_nt6561\_Genome\_Tile|1  
TAACCTGTCTTGTACATTCTTAACCTATATTACATTTAAGGGTATTAAATATATTTGTC  
>HPV103\_Unclassified\_109390382\_nt6601\_Genome\_Tile|1  
GGGTATTAAATATATTTGTCATGGTACCGGCTCTGCGTGATTTGTTATTGAGTCATGTA  
>HPV103\_Unclassified\_109390382\_nt6681\_Genome\_Tile|1  
CTTTTAGTCTTTGGCTTCCGTCCGGCTTGGACGTGCAGGGGCTATACACACTGTTTTTTT  
>HPV103\_Unclassified\_109390382\_nt6701\_Genome\_Tile|1  
TCCGGCTTGGACGTGCAGGGGCTATACACACTGTTTTTTTGGATACTTCTTTAATAAAGC  
>HPV103\_Unclassified\_109390382\_nt6721\_Genome\_Tile|1  
GCTATACACACTGTTTTTTTGGATACTTCTTTAATAAAGCTTTCTTTTCAGTGAAACCGAT  
>HPV103\_Unclassified\_109390382\_nt6741\_Genome\_Tile|1  
GGATACTTCTTTAATAAAGCTTTCTTTTCAGTGAAACCGATAACGGTCGCCAACTCCGTTG  
>HPV103\_Unclassified\_109390382\_nt6761\_Genome\_Tile|1  
TTTCTTTTCAGTGAAACCGATAACGGTCGCCAACTCCGTTGCCAACTTTTCAGGTATGTACT  
>HPV103\_Unclassified\_109390382\_nt6821\_Genome\_Tile|1  
TTGCAAGTTTCAACAACAAGATTACTCAGCCTTCCAGCAACCGAATTAGTTATCTGGCCG  
>HPV103\_Unclassified\_109390382\_nt6841\_Genome\_Tile|1  
ATTACTCAGCCTTCCAGCAACCGAATTAGTTATCTGGCCGTTGGCCACGACCGGCAGCGA  
>HPV103\_Unclassified\_109390382\_nt6861\_Genome\_Tile|1  
CCGAATTAGTTATCTGGCCGTTGGCCACGACCGGCAGCGATGTTTTGTAATATCTTGAT  
>HPV103\_Unclassified\_109390382\_nt6941\_Genome\_Tile|1  
CTACCACCTATTCGTTTGTCTTTACTAACCAGGAGAGGTGTATACTATATAAAGTAGAAG  
>HPV103\_Unclassified\_109390382\_nt6961\_Genome\_Tile|1  
TTTACTAACCAGGAGAGGTGTATACTATATAAAGTAGAAGCTGTATTGGGCAGTTCTCTT  
>HPV103\_Unclassified\_109390382\_nt6981\_Genome\_Tile|1  
TATACTATATAAAGTAGAAGCTGTATTGGGCAGTTCTCTTTTGCCTGGTTGTACCCCTGT  
>HPV103\_Unclassified\_109390382\_nt7001\_Genome\_Tile|1  
CTGTATTGGGCAGTTCTCTTTTGCCTGGTTGTACCCCTGTGTGGTGGATGGTGGTGGGCT  
>HPV103\_Unclassified\_109390382\_nt7041\_Genome\_Tile|1  
GTGGTGGATGGTGGTGGGCTCTGGGAAATGAATATTGTTCCATTCTTGTATTGTATGG  
>HPV103\_Unclassified\_109390382\_nt7061\_Genome\_Tile|1  
CTGGGAAATGAATATTGTTCCATTCTTGTATTGTATGGCAATTGTATTTATGCTGTGC  
>HPV103\_Unclassified\_109390382\_nt7081\_Genome\_Tile|1  
CATTCTTGTATTGTATGGCAATTGTATTTATGCTGTGCGTTTGTTTTAACTGTAATAT  
>HPV103\_Unclassified\_109390382\_nt7161\_Genome\_Tile|1  
TGTTTAGCTATTAGAGTGTAACCTATATATATGCGGGATTTGGCCAGTACTTGTGTATGT  
>HPV103\_Unclassified\_109390382\_nt7181\_Genome\_Tile|1  
ACTATATATATGCGGGATTTGGCCAGTACTTGTGTATGTATAGTGATATAAAAGGTGTGT  
>HPV96\_Beta\_50253426\_nt0041\_Genome\_Tile|1  
TAAACATGCTAACCGCACCCGGTATAAGCTATAAAATATCTGAGGTGATGCAGTATCTG  
>HPV96\_Beta\_50253426\_nt0061\_Genome\_Tile|1  
GGTATAAGCTATAAAATATCCTGAGGTGATGCAGTATCTGATCCTGGCAGTCACTCCTGG  
>HPV96\_Beta\_50253426\_nt0081\_Genome\_Tile|1  
CTGAGGTGATGCAGTATCTGATCCTGGCAGTCACTCCTGGAACAACCGATCCAGTGGC  
>HPV96\_Beta\_50253426\_nt0201\_Genome\_Tile|1  
AACCGTTAACGGTAAGTTTCGCAACTCTCTCGGTTGCCAAAAGTTTTATCTTGAGAGGTT  
>HPV96\_Beta\_50253426\_nt0241\_Genome\_Tile|1  
AAGTTTTATCTTGAGAGGTTGTTGGCAATTACAACCTGCCACTCATAAACAAGTAACCGC

>HPV96\_Beta\_50253426\_nt0301\_Genome\_Tile|1  
CTGCGTTTCTAGGACATTTTATATACAGACATACAGATCTCTGTTTCATTGTTGAGATGGA  
>HPV96\_Beta\_50253426\_nt0341\_Genome\_Tile|1  
CTGTTTCATTGTTGAGATGGATTTAAAGACAGTGCAGCAACTTAGAAGTCATTTGGGCATT  
>HPV96\_Beta\_50253426\_nt0361\_Genome\_Tile|1  
TTTAAAGACAGTGCAGCAACTTAGAAGTCATTTGGGCATTCCTACTGAAGACCTGTTGTT  
>HPV96\_Beta\_50253426\_nt0381\_Genome\_Tile|1  
TTAGAAGTCATTTGGGCATTCCTACTGAAGACCTGTTGTTAGCCTGTAACTTCTGTAAGA  
>HPV96\_Beta\_50253426\_nt0401\_Genome\_Tile|1  
CCTACTGAAGACCTGTTGTTAGCCTGTAACTTCTGTAAGAAATTTTAACTTTGAGGAG  
>HPV96\_Beta\_50253426\_nt0421\_Genome\_Tile|1  
AGCCTGTAACTTCTGTAAGAAATTTTAACTTTGAGGAGCTATTAGGATTTGATAGCAA  
>HPV96\_Beta\_50253426\_nt0441\_Genome\_Tile|1  
AATTTTAACTTTGAGGAGCTATTAGGATTTGATAGCAAGACTTTAAATCTTATTTGGA  
>HPV96\_Beta\_50253426\_nt0461\_Genome\_Tile|1  
CTATTAGGATTTGATAGCAAGACTTTAAATCTTATTTGGAAGGAAGGTTATGCATATGCG  
>HPV96\_Beta\_50253426\_nt0481\_Genome\_Tile|1  
GACTTTAAATCTTATTTGGAAGGAAGGTTATGCATATGCGTGTGTTTCAATTGTGCTAG  
>HPV96\_Beta\_50253426\_nt0501\_Genome\_Tile|1  
AGGAAGGTTATGCATATGCGTGTGTTTCAATTGTGCTAGAACAGTAGCCAAAGTAGAAT  
>HPV96\_Beta\_50253426\_nt0561\_Genome\_Tile|1  
TTGAACATTTTATGAAAAACAGTCAAGGGACGAGAAATAGAATCTCGCAGTGGCAGTT  
>HPV96\_Beta\_50253426\_nt0601\_Genome\_Tile|1  
AGAATCTCGCAGTGGCAGTTTACTTTGTTGTATTGTTGTTAGATGCCAGTTTGTGTTGCG  
>HPV96\_Beta\_50253426\_nt0661\_Genome\_Tile|1  
ACTGTTAGATTATTTAGAAAAGTTAAATATTTGTGGGTATCAAGAAAACTTTATTTAGT  
>HPV96\_Beta\_50253426\_nt0841\_Genome\_Tile|1  
GACGAAGAGTTGACAGAAGAGCAGTCAGAAAACCTGTCAGAATCTACAGTAGCAGAGGTG  
>HPV96\_Beta\_50253426\_nt0861\_Genome\_Tile|1  
GCAGTCAGAAAACCTGTCAGAATCTACAGTAGCAGAGGTGGAGCCTCAGAGAACTCTGTA  
>HPV96\_Beta\_50253426\_nt0921\_Genome\_Tile|1  
CAAGATTGTAGTACCGTGTGGAGGCTGTGATTCCCGGCTGAAAATCTACGTTTCTGCTAC  
>HPV96\_Beta\_50253426\_nt1181\_Genome\_Tile|1  
GATTTAATTGATGATGGGGATGCTGTTGATAATGCGAATGAGCAGGGAATTTCCCGAGAT  
>HPV96\_Beta\_50253426\_nt1341\_Genome\_Tile|1  
TGGAAGCAATACCTTTGTCGCCGCAACACAAATGTAAAAAGCGGCTATTTATGGAACAGG  
>HPV96\_Beta\_50253426\_nt1361\_Genome\_Tile|1  
CCGCAACACAAATGTAAAAAGCGGCTATTTATGGAACAGGACAGCGGGCTTGAGTTATCA  
>HPV96\_Beta\_50253426\_nt1441\_Genome\_Tile|1  
TACTGCTCCGGAGGTGGAGGTACCCCCAAATACTGACGGCACAGCACGGACAGAAGTTCA  
>HPV96\_Beta\_50253426\_nt1481\_Genome\_Tile|1  
ACAGCACGGACAGAAGTTCAGGCGAGCAATGAGCATTATAGACTATTGTTAAAATGCAGT  
>HPV96\_Beta\_50253426\_nt1501\_Genome\_Tile|1  
GGCGAGCAATGAGCATTATAGACTATTGTTAAAATGCAGTAATCTCAGAGCTACAATGCT  
>HPV96\_Beta\_50253426\_nt1541\_Genome\_Tile|1  
AATCTCAGAGCTACAATGCTCAGCAAATTTAAAAACAGCTTTGGGGTGGGGTTTATGGAA  
>HPV96\_Beta\_50253426\_nt1561\_Genome\_Tile|1  
CAGCAAATTTAAAAACAGCTTTGGGGTGGGGTTTATGGAACCTGTGTAGGAAATTTAATAG  
>HPV96\_Beta\_50253426\_nt1581\_Genome\_Tile|1  
TTGGGGTGGGGTTTATGGAACCTGTGTAGGAAATTTAATAGCAATAAGACTTGTGTGTCGGG  
>HPV96\_Beta\_50253426\_nt1601\_Genome\_Tile|1  
CTGTGTAGGAAATTTAATAGCAATAAGACTTGTGTGTCGGGACTGGGTCGTAACCTGCATAT  
>HPV96\_Beta\_50253426\_nt1681\_Genome\_Tile|1  
AGAAGGATGTAAGCAACTGTTACAAGAACATTGTGGTTATATATGGCTTCATACACTATG  
>HPV96\_Beta\_50253426\_nt1701\_Genome\_Tile|1

TACAAGAACATTGTGGTTATATATGGCTTCATACACTATGTCCAATGTCACTCTTTCTAT  
>HPV96\_Beta\_50253426\_nt1721\_Genome\_Tile|1  
ATATGGCTTCATACACTATGTCCAATGTCACTCTTTCTATTGTGTTTTAAACTGGTAAA  
>HPV96\_Beta\_50253426\_nt1741\_Genome\_Tile|1  
TCCAATGTCACTCTTTCTATTGTGTTTTAAACTGGTAAAAGCAGAGATACAGTTGTAAG  
>HPV96\_Beta\_50253426\_nt1761\_Genome\_Tile|1  
TGTGTTTTTAAACTGGTAAAAGCAGAGATACAGTTGTAAGATTGTTACAAAGGATGTTAA  
>HPV96\_Beta\_50253426\_nt1781\_Genome\_Tile|1  
AGCAGAGATACAGTTGTAAGATTGTTACAAAGGATGTTAAGTATTCATAAAGAGCAACTC  
>HPV96\_Beta\_50253426\_nt1801\_Genome\_Tile|1  
ATTGTTACAAAGGATGTTAAGTATTCATAAAGAGCAACTCTTAACTGAACCACCAAAGTT  
>HPV96\_Beta\_50253426\_nt1821\_Genome\_Tile|1  
GTATTCATAAAGAGCAACTCTTAACTGAACCACCAAAGTTACGAAGTGTTATGGCTGTAC  
>HPV96\_Beta\_50253426\_nt1941\_Genome\_Tile|1  
GGATTGTTTCAGCAAACGATGATTAGTCACCATGAGGGCGATAATTTGCAATTTGAATTGT  
>HPV96\_Beta\_50253426\_nt2021\_Genome\_Tile|1  
TATGACAATGACTATATCGAAGATTCTGACATTGCATATAACTATGCTAAATTAGCTGAC  
>HPV96\_Beta\_50253426\_nt2041\_Genome\_Tile|1  
AGATTCTGACATTGCATATAACTATGCTAAATTAGCTGACGAAGACATAAATGCTCGCGC  
>HPV96\_Beta\_50253426\_nt2141\_Genome\_Tile|1  
TGTGCTTGGATGGTAAGACATTACAAACGAGGTGAAATGAGATATATGTCTATTTCTAAA  
>HPV96\_Beta\_50253426\_nt2161\_Genome\_Tile|1  
TTACAAACGAGGTGAAATGAGATATATGTCTATTTCTAAATGGATATGGTATAAATTTAAA  
>HPV96\_Beta\_50253426\_nt2201\_Genome\_Tile|1  
TGGATATGGTATAAATTAAGAGTAGAAAAATGGCGGCCACTGGTCAAACATAGTAAAA  
>HPV96\_Beta\_50253426\_nt2221\_Genome\_Tile|1  
AAAAGTAGAAAAATGGCGGCCACTGGTCAAACATAGTAAAAATTTGTTAGATTCCAAGGTAT  
>HPV96\_Beta\_50253426\_nt2261\_Genome\_Tile|1  
TTTGTAGATTCCAAGGTATAAATTTTATAATGTTTTTAGATGCCTTCAAACACTTCCTT  
>HPV96\_Beta\_50253426\_nt2321\_Genome\_Tile|1  
TTGTCTAGAACAAAAAAACTGTATTTTATTTTATGGTCCTTCTGATTGTGGCAAAACG  
>HPV96\_Beta\_50253426\_nt2361\_Genome\_Tile|1  
CTTCTGATTGTGGCAAAACGATGTTTTGCATGTCTACTAATTAAAGCTCTCGGTGGTAGGG  
>HPV96\_Beta\_50253426\_nt2461\_Genome\_Tile|1  
ACCTTTAACGAAAGCAAGATTGCTATGTTAGATGATGCTACAGAAGCTTGTTGGAATTA  
>HPV96\_Beta\_50253426\_nt2581\_Genome\_Tile|1  
TAAAGCTCCCATACAGATTAGATTTCTCCATTATTGATTACCTCCAATTATGATATTTT  
>HPV96\_Beta\_50253426\_nt2601\_Genome\_Tile|1  
GATTTCTCCATTATTGATTACCTCCAATTATGATATTTTAAAAAATGAGAGGTATAGAT  
>HPV96\_Beta\_50253426\_nt2621\_Genome\_Tile|1  
ACCTCCAATTATGATATTTTAAAAAATGAGAGGTATAGATTTTGGTTAGCAGAATTAAA  
>HPV96\_Beta\_50253426\_nt2641\_Genome\_Tile|1  
AAAAAATGAGAGGTATAGATTTTGGTTAGCAGAATTAAATATTTGAATTTAAGAATAA  
>HPV96\_Beta\_50253426\_nt2841\_Genome\_Tile|1  
TTCAATGCTCTAGAAGACCAGCTCATGGACATATATGAACAAGGGAGTGATAAATTAGAA  
>HPV96\_Beta\_50253426\_nt2981\_Genome\_Tile|1  
GGGGTACACTCCTGTTCCCTAGTTTAGCAGCTTCAGAAACAAAGCTAAAGATGTTATTTA  
>HPV96\_Beta\_50253426\_nt3041\_Genome\_Tile|1  
CATGGTTCTTCAACTAGAGAAATTAAGAGACTCACCTTACAAAGATGAACCTTGACATT  
>HPV96\_Beta\_50253426\_nt3081\_Genome\_Tile|1  
AAAGATGAACCTTGGACATTGATTAACACCAGTTTAGAAACATATAGAGCTCCTCCTGTT  
>HPV96\_Beta\_50253426\_nt3101\_Genome\_Tile|1  
GATTAAACACCAGTTTAGAAACATATAGAGCTCCTCCTGTTAACTGCTTTAAAAAAGGTCC  
>HPV96\_Beta\_50253426\_nt3181\_Genome\_Tile|1  
TTGATGCAGATCCTGAAAATATTATGTTATACACATCCTGGCAGTTCATTTACTTTGAAG



>HPV96\_Beta\_50253426\_nt3201\_Genome\_Tile|1  
ATTATGTTATACACATCCTGGCAGTTCATTACTTTGAAGACACTGATGGACATTGGCAA  
>HPV96\_Beta\_50253426\_nt3221\_Genome\_Tile|1  
GCAGTTCATTTACTTTGAAGACACTGATGGACATTGGCAAAAACTGAAGGGCGTATTGA  
>HPV96\_Beta\_50253426\_nt3241\_Genome\_Tile|1  
ACACTGATGGACATTGGCAAAAACTGAAGGGCGTATTGATTATGCTGGTTTATATTATT  
>HPV96\_Beta\_50253426\_nt3261\_Genome\_Tile|1  
AAAACTGAAGGGCGTATTGATTATGCTGGTTTATATTATTTGGAAGGGCAATTAAGACAT  
>HPV96\_Beta\_50253426\_nt3281\_Genome\_Tile|1  
TTATGCTGGTTTATATTATTTGGAAGGGCAATTAAGACATTATTACGTGGAATTTAAAGT  
>HPV96\_Beta\_50253426\_nt3301\_Genome\_Tile|1  
TGGAAGGGCAATTAAGACATTATTACGTGGAATTTAAAGTAGATGCTCGCAGATTTGGAA  
>HPV96\_Beta\_50253426\_nt3421\_Genome\_Tile|1  
CCTCGCCGTCCTCATACGAAGAGGTCAGAGAACGGGCTGAGCCCCCGACGTCCCCGAGG  
>HPV96\_Beta\_50253426\_nt3441\_Genome\_Tile|1  
GAGGTCAGAGAACGGGCTGAGCCCCCGACGTCCCCGAGGTCGGAACCGCCCCTGACTCC  
>HPV96\_Beta\_50253426\_nt3461\_Genome\_Tile|1  
GCCCCCGACGTCCCCGAGGTCGGAACCGCCCCCTGACTCCGGCACCCCTACAGACTGGGAG  
>HPV96\_Beta\_50253426\_nt3581\_Genome\_Tile|1  
TGCCTCCCTCAGGGTCAGGCAAAAAGTATCACGATCTACTACCGGAAAGCCGAAGAACG  
>HPV96\_Beta\_50253426\_nt3601\_Genome\_Tile|1  
AAAAAGTATCACGATCTACTACCGGAAAGCCGAAGAACGACGGTCCCGGAGTCCATCGT  
>HPV96\_Beta\_50253426\_nt3641\_Genome\_Tile|1  
ACGGTCCCGGAGTCCATCGTCAGGGACAGAGCAAGCCGGTGCACGGGGACGGGGACAACG  
>HPV96\_Beta\_50253426\_nt3661\_Genome\_Tile|1  
CAGGGACAGAGCAAGCCGGTGCACGGGGACGGGGACAACGGGGAACCAGGGCCCGTTCCA  
>HPV96\_Beta\_50253426\_nt3841\_Genome\_Tile|1  
GAAGTAGATCTGCAGAGTGCAGATCTATTGACCAGTGTGGCATTCCAGCTTCACAAGTGG  
>HPV96\_Beta\_50253426\_nt4001\_Genome\_Tile|1  
AAATACTTTAAAATGTTATCGCTACAGGGTGAAAGACAACTTAGAGGCTCTTTTGATAA  
>HPV96\_Beta\_50253426\_nt4021\_Genome\_Tile|1  
GCTACAGGGTGAAAGACAACTTAGAGGCTCTTTTGATAAAATTAGTACAACATGGTCAT  
>HPV96\_Beta\_50253426\_nt4041\_Genome\_Tile|1  
CTTAGAGGCTCTTTTGATAAAATTAGTACAACATGGTCATGGGTGGCTTCACAAGGTAAT  
>HPV96\_Beta\_50253426\_nt4101\_Genome\_Tile|1  
ACACGCATAGGTAGAGCTCGCATGCTGCTTAGCTTTGTTTCAGAAGATCAGAGGGAAAAA  
>HPV96\_Beta\_50253426\_nt4181\_Genome\_Tile|1  
ACCTAAGGGTGTTGATTGGTCCTTTGGTAGCTTTGATAGTCTTTAACTACTAACATTTCA  
>HPV96\_Beta\_50253426\_nt4201\_Genome\_Tile|1  
CCTTTGGTAGCTTTGATAGTCTTTAACTACTAACATTTTCATTTTTTTTATACTAATAACTA  
>HPV96\_Beta\_50253426\_nt4221\_Genome\_Tile|1  
CTTTAACTACTAACATTTTCATTTTTTTTATACTAATAACTAACCCTTTATATATTGTAT  
>HPV96\_Beta\_50253426\_nt4241\_Genome\_Tile|1  
TTTTTTTATACTAATAACTAACCCTTTATATATTGTATGGCGCGCGCACGTAGAGTAA  
>HPV96\_Beta\_50253426\_nt4481\_Genome\_Tile|1  
GTTATGTCCCTTTGCCTGAAGGACCTGCACCTGGTGTTCGCGTGGGTGGTACACCAACTG  
>HPV96\_Beta\_50253426\_nt4621\_Genome\_Tile|1  
GTTGCACCTTCAGTTGTCCCTCTTACAGACACAGGACCTGATTTGTTGCCAGGAGAAATT  
>HPV96\_Beta\_50253426\_nt4641\_Genome\_Tile|1  
TCTTACAGACACAGGACCTGATTTGTTGCCAGGAGAAATTGAGACCATTTGCTGAGGTACA  
>HPV96\_Beta\_50253426\_nt4701\_Genome\_Tile|1  
TCCTGTGTCAGATGTAACACCTGTTGACACACCAGTGGTGACAGGTGGTAGAGGCTCGAG  
>HPV96\_Beta\_50253426\_nt4881\_Genome\_Tile|1  
GTTATCTGACCAAATCATTGTACAATCAGGTTCTGGAGGACAAAATATTGGTGGTAGTGG  
>HPV96\_Beta\_50253426\_nt4921\_Genome\_Tile|1

CAAAATATTGGTGGTAGTGGGCCTTCTGTGGAAATAGAATTAGAAGAGTCCCCACAAGA  
>HPV96\_Beta\_50253426\_nt5001\_Genome\_Tile|1  
GCCAACCCCTCCTAGAAAACTAGTACACCTGTAAGAATGGCTCAGCAGGCCTCACGAGC  
>HPV96\_Beta\_50253426\_nt5021\_Genome\_Tile|1  
CTAGTACACCTGTAAGAATGGCTCAGCAGGCCTCACGAGCTTTACGTAGAGCTTTATACA  
>HPV96\_Beta\_50253426\_nt5041\_Genome\_Tile|1  
GCTCAGCAGGCCTCACGAGCTTTACGTAGAGCTTTATACAATCGTAGATTAAACACAACAG  
>HPV96\_Beta\_50253426\_nt5061\_Genome\_Tile|1  
TTTACGTAGAGCTTTATACAATCGTAGATTAAACACAACAGGTTTCTGTAGAAAATCCTCT  
>HPV96\_Beta\_50253426\_nt5081\_Genome\_Tile|1  
ATCGTAGATTAAACACAACAGGTTTCTGTAGAAAATCCTCTATTTTTACAACAGCCTTCTA  
>HPV96\_Beta\_50253426\_nt5101\_Genome\_Tile|1  
GTTTCTGTAGAAAATCCTCTATTTTTACAACAGCCTTCTAAATTAGTTACTTTTCAATTT  
>HPV96\_Beta\_50253426\_nt5321\_Genome\_Tile|1  
AACGAGCAACCATCAGAACACGCTCTGGAGCACAGGTTGGCACTCAAGTTCACTTTTACA  
>HPV96\_Beta\_50253426\_nt5341\_Genome\_Tile|1  
CGCTCTGGAGCACAGGTTGGCACTCAAGTTCACTTTTACAGAGATATAAGCACTATTGAC  
>HPV96\_Beta\_50253426\_nt5361\_Genome\_Tile|1  
CACTCAAGTTCACTTTTACAGAGATATAAGCACTATTGACACAGAACCCTCCATTGAATT  
>HPV96\_Beta\_50253426\_nt5481\_Genome\_Tile|1  
ATTTGTTAATATGGATGTACAAGAAATTCCCTACTTTGGAGGAAGTGCCAGAATTACATTC  
>HPV96\_Beta\_50253426\_nt5501\_Genome\_Tile|1  
AAGAAATTCCCTACTTTGGAGGAAGTGCCAGAATTACATTCTGAAGATGTGCTATTAGAGG  
>HPV96\_Beta\_50253426\_nt5521\_Genome\_Tile|1  
GAAGTGCCAGAATTACATTCTGAAGATGTGCTATTAGAGGAGGCATTAGAAGACTTTAGT  
>HPV96\_Beta\_50253426\_nt5541\_Genome\_Tile|1  
TGAAGATGTGCTATTAGAGGAGGCATTAGAAGACTTTAGTGGAGCACAATTAGTTTTTGG  
>HPV96\_Beta\_50253426\_nt5601\_Genome\_Tile|1  
AAATTCTAGAAGATCAAATGTAATAACTATTCCCTAGATTTGAGACTCCAAGAGAGATTAA  
>HPV96\_Beta\_50253426\_nt5621\_Genome\_Tile|1  
TAATAACTATTCCTAGATTTGAGACTCCAAGAGAGATTAATATTTATACACCAGATTTAG  
>HPV96\_Beta\_50253426\_nt5641\_Genome\_Tile|1  
GAGACTCCAAGAGAGATTAATATTTATACACCAGATTTAGATGGATATTACATATCATAT  
>HPV96\_Beta\_50253426\_nt5661\_Genome\_Tile|1  
TATTTATACACCAGATTTAGATGGATATTACATATCATATCCAGAAACAAGGAATATTCC  
>HPV96\_Beta\_50253426\_nt5681\_Genome\_Tile|1  
ATGGATATTACATATCATATCCAGAAACAAGGAATATTCCAGAAAGTTATATACACTGAGC  
>HPV96\_Beta\_50253426\_nt5701\_Genome\_Tile|1  
CCAGAAACAAGGAATATTCCAGAAAGTTATATACACTGAGCCAGACACGACTCCAACAATA  
>HPV96\_Beta\_50253426\_nt5721\_Genome\_Tile|1  
AGAAGTTATATACACTGAGCCAGACACGACTCCAACAATAATAATTCATACAGAGGATTT  
>HPV96\_Beta\_50253426\_nt7341\_Genome\_Tile|1  
ACTGTAACCGGGAGGGCTACAACCTCAAGAGGTACAAAACGAAAACGACGCTGACCGCTA  
>HPV96\_Beta\_50253426\_nt7361\_Genome\_Tile|1  
AACCTCAAGAGGTACAAAACGAAAACGACGCTGACCGCTATCGGTTCCGGGACCTTCAAT  
>HPV93\_Beta\_37089393\_nt0041\_Genome\_Tile|1  
CTTTATTACTCAACAAGTATTTTCTTGACCGATTTTCGTAGCACCTGTTTATAAGTATTG  
>HPV93\_Beta\_37089393\_nt0061\_Genome\_Tile|1  
TTTCTTGACCGATTTTCGTAGCACCTGTTTATAAGTATTGATATATGGTATATAAGGCAG  
>HPV93\_Beta\_37089393\_nt0101\_Genome\_Tile|1  
ATATATGGTATATAAGGCAGACATCTTAATGGCGGCAGTAAGTAAACCTCAGACCATTAC  
>HPV93\_Beta\_37089393\_nt0121\_Genome\_Tile|1  
ACATCTTAATGGCGGCAGTAAGTAAACCTCAGACCATTACAGAGCTTGCTAGGTGTCTTG  
>HPV93\_Beta\_37089393\_nt0161\_Genome\_Tile|1  
AGAGCTTGCTAGGTGTCTTGGTATACCGTTAGAAGATGCTTTGGTGCCTTGTAATTTTTG

>HPV93\_Beta\_37089393\_nt0181\_Genome\_Tile|1  
GTATACCGTTAGAAGATGCTTTGGTGCTTGTAAATTTTTGTAAAAAGTTTTTAACATATT  
>HPV93\_Beta\_37089393\_nt0221\_Genome\_Tile|1  
TAAAAAGTTTTTAACATATTTGGAAGTCGTTGAATTTGATGTAAAACAACTTTGTCTAAT  
>HPV93\_Beta\_37089393\_nt0301\_Genome\_Tile|1  
TTGGCTGTTGCAGATGTTGTTGTATAGCATCAGCCACGTATGAATTTGATAATTACTTGA  
>HPV93\_Beta\_37089393\_nt0361\_Genome\_Tile|1  
ATGATAGTGTGTTGGCTGGGCAATAGAAGTTAAGGAAAAAAGCCACTCTCTGAAATTA  
>HPV93\_Beta\_37089393\_nt0381\_Genome\_Tile|1  
GCAATAGAAGTTAAGGAAAAAAGCCACTCTCTGAAATTATAGTGAGGTGTCGCCATTGT  
>HPV93\_Beta\_37089393\_nt0401\_Genome\_Tile|1  
AAAGCCACTCTCTGAAATTATAGTGAGGTGTCGCCATTGTATGAAAAAATTAGATCAAAT  
>HPV93\_Beta\_37089393\_nt0681\_Genome\_Tile|1  
TCAAGATTATTGTGTTCTGCGGCGGAGGCTGTGGATCCCGACTTCGAATATTTGTTGCTG  
>HPV93\_Beta\_37089393\_nt0721\_Genome\_Tile|1  
ACTTCGAATATTTGTTGCTGCCACAGAATTTGGAGTTCGTTGCTTTCAGCAATTGCTAGT  
>HPV93\_Beta\_37089393\_nt1021\_Genome\_Tile|1  
AGTTAGAAGACAGCGAGACTTTATTGCAATCATTAAAGCGAAAGTATATTAGTCCCAGGG  
>HPV93\_Beta\_37089393\_nt1181\_Genome\_Tile|1  
GAACTTAACAAATGAAGTTGAAGATATTGTTACACAGGTGGAACAAAAGGAGGAGGTACC  
>HPV93\_Beta\_37089393\_nt1201\_Genome\_Tile|1  
AAGATATTGTTACACAGGTGGAACAAAAGGAGGAGGTACCGACAGCATCCACAACTTGA  
>HPV93\_Beta\_37089393\_nt1221\_Genome\_Tile|1  
GAACAAAAGGAGGAGGTACCGACAGCATCCACAACTTGAGGGAGGGGGAAAATGTACAT  
>HPV93\_Beta\_37089393\_nt1241\_Genome\_Tile|1  
GACAGCATCCACAACTTGAGGGAGGGGGAAAATGTACATTACAAGGAACTTATGAGATG  
>HPV93\_Beta\_37089393\_nt1281\_Genome\_Tile|1  
TACAAGGAACTTATGAGATGTAGTAATTTGAAAGCTACATTACTTGCAAAAATTCAAAGT  
>HPV93\_Beta\_37089393\_nt1321\_Genome\_Tile|1  
TACTTGCAAAAATTCAAAGTGCTTTTGGTGTTAGTTTTGCAGAGTTGACGCGGCAGTATA  
>HPV93\_Beta\_37089393\_nt1401\_Genome\_Tile|1  
AACGATTGGGTGATTGCAATTTATGGTGTGAATAATGATTTGTTTGAAGGTTCCAAAAA  
>HPV93\_Beta\_37089393\_nt1421\_Genome\_Tile|1  
TTATGGTGTGAATAATGATTTGTTTGAAGGTTCCAAAAAATTGCTGCAACAGCACTGTGA  
>HPV93\_Beta\_37089393\_nt1441\_Genome\_Tile|1  
TGTTTGAAGGTTCCAAAAAATTGCTGCAACAGCACTGTGATTATATTTGGCTCACTGAAA  
>HPV93\_Beta\_37089393\_nt1501\_Genome\_Tile|1  
TGTCTGCAATGTATTTATATTTATTATGTTTTAAAGCTGGGAAGAATAGGCATACTGTGA  
>HPV93\_Beta\_37089393\_nt1521\_Genome\_Tile|1  
TTATTATGTTTTAAAGCTGGGAAGAATAGGCATACTGTGATAAGATTATTAATCTCTATG  
>HPV93\_Beta\_37089393\_nt1541\_Genome\_Tile|1  
GAAGAATAGGCATACTGTGATAAGATTATTAATCTCTATGCTACATGTTGCAGAGGAACA  
>HPV93\_Beta\_37089393\_nt1561\_Genome\_Tile|1  
TAAGATTATTAATCTCTATGCTACATGTTGCAGAGGAACAAATACTGTCTGAACCACCAA  
>HPV93\_Beta\_37089393\_nt1581\_Genome\_Tile|1  
CTACATGTTGCAGAGGAACAAATACTGTCTGAACCACCAAAGCTTAGAAGCACTGTAGCA  
>HPV93\_Beta\_37089393\_nt1661\_Genome\_Tile|1  
CAGTTCCAACCTCGGGAACATTTACCCATGGTTCATATCCTAAATGGATAGTAGAACAAAC  
>HPV93\_Beta\_37089393\_nt2021\_Genome\_Tile|1  
AAAATTTATTAGATACCAAGGTATTAATTTTATAAGTTTTCTCTCTGCTTTGAAGGACTT  
>HPV93\_Beta\_37089393\_nt2641\_Genome\_Tile|1  
GAAGTTGCTAGTGATACCCTAGAAGCACAAATAGAACATTGGCGGCTTCTTCGTAAAGAA  
>HPV93\_Beta\_37089393\_nt2721\_Genome\_Tile|1  
TAGGCAAAAATGGTGTTTTTAAGACTTGGGTATCAGCCAGTACCACCACTTGCAACATCTGA  
>HPV93\_Beta\_37089393\_nt2781\_Genome\_Tile|1

AGCAAAAGCCAAAGAGGCAATTGGCATGATGTTACAGCTGCAGTCATTACAAAAGTCAGC  
>HPV93\_Beta\_37089393\_nt2801\_Genome\_Tile|1  
TTGGCATGATGTTACAGCTGCAGTCATTACAAAAGTCAGCCTATGCATCTGAAAAGTGGA  
>HPV93\_Beta\_37089393\_nt3041\_Genome\_Tile|1  
CAAATCATACAGGCATTTATTATACTATAAAGGATTTCAAGCATTACTATACTTTGTTTG  
>HPV93\_Beta\_37089393\_nt3061\_Genome\_Tile|1  
TATACTATAAAGGATTTCAAGCATTACTATACTTTGTTTGCTGACGATGCAAAAAAATAT  
>HPV93\_Beta\_37089393\_nt3181\_Genome\_Tile|1  
AGCTCCACGCCGCCAGAATCCCCAGGACGAGAAAGAGCTTCCCCAGAGTCCACCGCTCAC  
>HPV93\_Beta\_37089393\_nt3201\_Genome\_Tile|1  
CCCAGGACGAGAAAGAGCTTCCCCAGAGTCCACCGCTCACACCAAGACCACCGCCCGTTC  
>HPV93\_Beta\_37089393\_nt3401\_Genome\_Tile|1  
GGCGAAGGTCGCGGTCCAGAACACATCCTCTCAATCTCGATCTCGGTCGCGATCCTCTT  
>HPV93\_Beta\_37089393\_nt3421\_Genome\_Tile|1  
ACAACATCCTCTCAATCTCGATCTCGGTCGCGATCCTCTTCTCTAGAGGATCAAGGGGG  
>HPV93\_Beta\_37089393\_nt3801\_Genome\_Tile|1  
ATGCTTTAGGAATCGGGCAAAACAAAAGTATAAAGGCTTATGCAAGGCATTTAGCACAAAC  
>HPV93\_Beta\_37089393\_nt3901\_Genome\_Tile|1  
AGGTCCAGAGTGCTCGTAAGTTTTACCAGCCATACACAGCGCAGCTCTTTTTTAAAGGTA  
>HPV93\_Beta\_37089393\_nt3921\_Genome\_Tile|1  
TTTTACCAGCCATACACAGCGCAGCTCTTTTTTAAAGGTAGTTAAGTTTCCAAAAGGAGT  
>HPV93\_Beta\_37089393\_nt3941\_Genome\_Tile|1  
GCAGCTCTTTTTTAAAGGTAGTTAAGTTTCCAAAAGGAGTAGATTGGTCTTTAGGCAACT  
>HPV93\_Beta\_37089393\_nt3961\_Genome\_Tile|1  
GTTAAGTTTCCAAAAGGAGTAGATTGGTCTTTAGGCAACTTAGATAAACTATAATACTAA  
>HPV93\_Beta\_37089393\_nt4021\_Genome\_Tile|1  
CTTGCTTTTGCTACTAACATATAACCAAGCTTTCTTTGTTTTTGTATATTCTTGCAATGG  
>HPV93\_Beta\_37089393\_nt4381\_Genome\_Tile|1  
CCGTAGATACCATAGCTCCTGTAGAACCATCCTCATCTTCAATTGTTCCATTAACAGAAA  
>HPV93\_Beta\_37089393\_nt4401\_Genome\_Tile|1  
GTAGAACCATCCTCATCTTCAATTGTTCCATTAACAGAACTTCTGGTGTAGATTTATTA  
>HPV93\_Beta\_37089393\_nt4421\_Genome\_Tile|1  
AATTGTTCCATTAACAGAACTTCTGGTGTAGATTTATTACCAGGAGAAATTGAATCTAT  
>HPV93\_Beta\_37089393\_nt4441\_Genome\_Tile|1  
CTTCTGGTGTAGATTTATTACCAGGAGAAATTGAATCTATTGCAGAAGTACATCCTGTAC  
>HPV93\_Beta\_37089393\_nt4501\_Genome\_Tile|1  
CTGATGTTGCCAGTTTTGATACACCAGTTGTTACCACCAGTAAAGGTTCCAGTGCAATTT  
>HPV93\_Beta\_37089393\_nt4521\_Genome\_Tile|1  
ACACCAGTTGTTACCACCAGTAAAGGTTCCAGTGCAATTTTAGAAGTTGCTCCCGATCCA  
>HPV93\_Beta\_37089393\_nt4701\_Genome\_Tile|1  
TCTGGTCTGGTGGACAGTCAGTAGGTAGAGCTGAAGAAATCGAGTTGCAAGAATTCCTT  
>HPV93\_Beta\_37089393\_nt4721\_Genome\_Tile|1  
AGTAGGTAGAGCTGAAGAAATCGAGTTGCAAGAATTCCTTAGTAGATATTCATTTGAAAT  
>HPV93\_Beta\_37089393\_nt4781\_Genome\_Tile|1  
AGAAACACCTACTCCACCAAGGAGAAGTAGCACTCCTTTACAAAGACTTAGACAAGCTGT  
>HPV93\_Beta\_37089393\_nt4801\_Genome\_Tile|1  
GGAGAAGTAGCACTCCTTTACAAAGACTTAGACAAGCTGTAAGGGGCAGATCTTTAACAA  
>HPV93\_Beta\_37089393\_nt4821\_Genome\_Tile|1  
CAAAGACTTAGACAAGCTGTAAGGGGCAGATCTTTAACAAATAGACGGTTAATACAACAA  
>HPV93\_Beta\_37089393\_nt4981\_Genome\_Tile|1  
AGCAAGATTTAGATGATTTTATAGAACCACCAACAGAGATTTTCTTGATATTCAAACCTC  
>HPV93\_Beta\_37089393\_nt5101\_Genome\_Tile|1  
AACGAGCCACTATTTCGTACACGCTCGGGGGCCCAAATTGGGTACACAGGTACACTTTTATA  
>HPV93\_Beta\_37089393\_nt5301\_Genome\_Tile|1  
TTGGAATCATACCCTGAGGCACATACAGAGGATGCATTATTAGATGAAGCAGTAGAAGAT

>HPV93\_Beta\_37089393\_nt5321\_Genome\_Tile|1  
ACATACAGAGGATGCATTATTAGATGAAGCAGTAGAAGATTTTCAGTGGTCTCAATTGGT  
>HPV93\_Beta\_37089393\_nt5361\_Genome\_Tile|1  
TTCAGTGGTCTCAATTGGTAATTGGCAATAGAAGATCTACCTCTACTTACACAGTACCT  
>HPV93\_Beta\_37089393\_nt5381\_Genome\_Tile|1  
AATTGGCAATAGAAGATCTACCTCTACTTACACAGTACCTCGCTTTGAAACCCCAAGAAA  
>HPV93\_Beta\_37089393\_nt5401\_Genome\_Tile|1  
CCTCTACTTACACAGTACCTCGCTTTGAAACCCCAAGAAATGCTACATATTACACACAAG  
>HPV93\_Beta\_37089393\_nt5421\_Genome\_Tile|1  
CGCTTTGAAACCCCAAGAAATGCTACATATTACACACAAGACTTAAAAGGTTATTATGTA  
>HPV93\_Beta\_37089393\_nt5441\_Genome\_Tile|1  
TGCTACATATTACACACAAGACTTAAAAGGTTATTATGTATCATATCCAGAATCTAGAGA  
>HPV93\_Beta\_37089393\_nt5461\_Genome\_Tile|1  
ACTTAAAAGGTTATTATGTATCATATCCAGAATCTAGAGATGATTTGCAAATTATTTATC  
>HPV93\_Beta\_37089393\_nt5481\_Genome\_Tile|1  
TCATATCCAGAATCTAGAGATGATTTGCAAATTATTTATCCCTCTCCAGATCTCCCAGCA  
>HPV93\_Beta\_37089393\_nt5501\_Genome\_Tile|1  
TGATTTGCAAATTATTTATCCCTCTCCAGATCTCCCAGCAGTTGTAATTCATACATATGA  
>HPV93\_Beta\_37089393\_nt5521\_Genome\_Tile|1  
CCTCTCCAGATCTCCCAGCAGTTGTAATTCATACATATGATAATAGTGGGGATTTTTATT  
>HPV93\_Beta\_37089393\_nt5541\_Genome\_Tile|1  
GTTGTAATTCATACATATGATAATAGTGGGGATTTTTATTACACCCAAGTTTACTACGG  
>HPV93\_Beta\_37089393\_nt6161\_Genome\_Tile|1  
ACCTAAATGTGATGGAGCCAATGACCAAAATGGGATTTGCCACCTATACAATTAGTAAA  
>HPV93\_Beta\_37089393\_nt6181\_Genome\_Tile|1  
ATGACCAAAATGGGATTTGCCACCTATACAATTAGTAAACACTGTTATTCAAGATGGGG  
>HPV93\_Beta\_37089393\_nt6421\_Genome\_Tile|1  
ACTTTTTTGTAAAGAGGTGGCAACGTAGGAGATGACATTCCTGGTGAACAAATAGACGCAG  
>HPV93\_Beta\_37089393\_nt6441\_Genome\_Tile|1  
AACGTAGGAGATGACATTCCTGGTGAACAAATAGACGCAGGCACATATAAAAATGATTTT  
>HPV93\_Beta\_37089393\_nt6681\_Genome\_Tile|1  
GTAGACAACACAAGAAACACAACTTCAGTATTAGTGTATATACAGACCCTGGGAAAATA  
>HPV93\_Beta\_37089393\_nt6901\_Genome\_Tile|1  
AATTAGGGTTTGTCCCAACTCCAGACAATCCGTTACAGAGTACTTATCGATATATTAATA  
>HPV93\_Beta\_37089393\_nt6941\_Genome\_Tile|1  
TACTTATCGATATATTAATAGTTTAGCTACACCATGTCCCGATAAGGTTCCACCAAAGGA  
>HPV93\_Beta\_37089393\_nt7101\_Genome\_Tile|1  
TATCAGGCAAACTTTGTACAATCACCAGCTAAACGGTCATCATCTATTTCTCGAGGAACT  
>HPV93\_Beta\_37089393\_nt7121\_Genome\_Tile|1  
ATCACCAGCTAAACGGTCATCATCTATTTCTCGAGGAACTAAAAGAAAAAGAAGCAAATA  
>HPV93\_Beta\_37089393\_nt7161\_Genome\_Tile|1  
AAAAGAAAAAGAAGCAAATAATTTTACCACTTTTGGTACAATAAAGAGTATATCAAACAG  
>HPV93\_Beta\_37089393\_nt7181\_Genome\_Tile|1  
ATTTTACCACTTTTGGTACAATAAAGAGTATATCAAACAGTATTCCAAGAATGCTTGTAT  
>HPV93\_Beta\_37089393\_nt7201\_Genome\_Tile|1  
ATAAAGAGTATATCAAACAGTATTCCAAGAATGCTTGTATTCATATGTCTGACTAATTTG  
>HPV93\_Beta\_37089393\_nt7341\_Genome\_Tile|1  
AGGTTCCAACACGCTCGGATTTGGCGCATCCTACCACATTTGGCGCCTTTTCTGCTGGCA  
>HPV92\_Beta\_27531786\_nt0021\_Genome\_Tile|1  
ACGCCATAGAAAAACACGTAACCGCTGCGTTATAATACAAACAGCTAGTATATAAATAC  
>HPV92\_Beta\_27531786\_nt0061\_Genome\_Tile|1  
AACAGCTAGTATATAAATACAGGCAGTGAAAGTGTCCCATCACAATGGCAAAACCTCCT  
>HPV92\_Beta\_27531786\_nt0081\_Genome\_Tile|1  
AGGCAGTGAAAGTGTTCATCACAATGGCAAAACCTCCTTCGGTGCAGGAACTTAGAAG  
>HPV92\_Beta\_27531786\_nt0101\_Genome\_Tile|1

TCACAATGGCAAAACCTCCTTCGGTGCAGGAACCTTAGAAGACAGTTAGATATTCCATTGG  
>HPV92\_Beta\_27531786\_nt0141\_Genome\_Tile|1  
ACAGTTAGATATTCCATTGGAGGACATTTTATTGCATTGTAATTTTTGTGAGGCTTTTTT  
>HPV92\_Beta\_27531786\_nt0161\_Genome\_Tile|1  
AGGACATTTTATTGCATTGTAATTTTTGTGAGGCTTTTTTAACATTTGAGGAGCTACTGC  
>HPV92\_Beta\_27531786\_nt0181\_Genome\_Tile|1  
AATTTTTGTGAGGCTTTTTTAACATTTGAGGAGCTACTGCAATTTGATGCAAAAAATTTA  
>HPV92\_Beta\_27531786\_nt0201\_Genome\_Tile|1  
AACATTTGAGGAGCTACTGCAATTTGATGCAAAAAATTTAAATTTAATTTGGAAGGAGAA  
>HPV92\_Beta\_27531786\_nt0221\_Genome\_Tile|1  
AATTTGATGCAAAAAATTTAAATTTAATTTGGAAGGAGAATTATGCTTATGCTTGCTGTG  
>HPV92\_Beta\_27531786\_nt0241\_Genome\_Tile|1  
AATTTAATTTGGAAGGAGAATTATGCTTATGCTTGCTGTGGTGCTTGTGCTAAACAAGTA  
>HPV92\_Beta\_27531786\_nt0261\_Genome\_Tile|1  
TTATGCTTATGCTTGCTGTGGTGCTTGTGCTAAACAAGTAGCAGCAATAGAAACAAAACA  
>HPV92\_Beta\_27531786\_nt0321\_Genome\_Tile|1  
TTTTTATGAGTATAGTGTACAAGGAAAGGATGCTATAGAAAGGACTCAGGTAGTCTTTT  
>HPV92\_Beta\_27531786\_nt0341\_Genome\_Tile|1  
AAGGAAAGGATGCTATAGAAAGGACTCAGGTAGTCTTTTGTGTTGTTAACTGTTAGAT  
>HPV92\_Beta\_27531786\_nt0361\_Genome\_Tile|1  
AGGGACTCAGGTAGTCTTTTGTGTTGTTTAACTGTTAGATGTAAGTTTTGTTTAAAGACAT  
>HPV92\_Beta\_27531786\_nt0381\_Genome\_Tile|1  
GTGTTGTTTAACTGTTAGATGTAAGTTTTGTTTAAAGACATTTGGATTACTTAGAGAAATT  
>HPV92\_Beta\_27531786\_nt0401\_Genome\_Tile|1  
GTAAGTTTTGTTTAAAGACATTTGGATTACTTAGAGAAATTGGCAGTTTGTGCATCAGGCA  
>HPV92\_Beta\_27531786\_nt0421\_Genome\_Tile|1  
TTGGATTACTTAGAGAAATTGGCAGTTTGTGCATCAGGCATTCCTTTTGATAGAGTTAGA  
>HPV92\_Beta\_27531786\_nt0461\_Genome\_Tile|1  
TTCCTTTTGATAGAGTTAGAGGAGCTTGAAGGCAGTGTGTAGGTTTTGTACAGAGATAT  
>HPV92\_Beta\_27531786\_nt0641\_Genome\_Tile|1  
AAGAATAGACTACAAGATAGTTTCCTCGTGGTGGCTGCGGAATTAAGCTTCGAATTTT  
>HPV92\_Beta\_27531786\_nt0901\_Genome\_Tile|1  
GATATTTTCAGATTTATTAGATGATGGGGACCTTGGGGACGCAGAATTGGGAAATCCCCAA  
>HPV92\_Beta\_27531786\_nt1061\_Genome\_Tile|1  
AATTGGAATCTATTACTATTTTCGCCTCAACGCAAAAGTAAGAGGCGACTGTTTCGAGGAAC  
>HPV92\_Beta\_27531786\_nt1081\_Genome\_Tile|1  
TCGCCTCAACGCAAAAGTAAGAGGCGACTGTTTCGAGGAACAGGACAGCGGACTTGAGCTT  
>HPV92\_Beta\_27531786\_nt1181\_Genome\_Tile|1  
AGGTACCGGGGTCAAAAGATGACGTCCCAGAACTGTTTCTGCTACAGCAGAACTAAGG  
>HPV92\_Beta\_27531786\_nt1201\_Genome\_Tile|1  
GACGTCCCAGAACTGTTTCTGCTACAGCAGAACTAAGGGAAGCCAAAACAAAGAACAT  
>HPV92\_Beta\_27531786\_nt1241\_Genome\_Tile|1  
GAAGCCAAAACAAAGAACATTACAAACAGTTACTACAGTGCAGCAATGCGCGGGCTACAT  
>HPV92\_Beta\_27531786\_nt1261\_Genome\_Tile|1  
TACAAACAGTTACTACAGTGCAGCAATGCGCGGGCTACATTGCTTAGTAAATTTAAAGCT  
>HPV92\_Beta\_27531786\_nt1441\_Genome\_Tile|1  
TTATTTTCAGCAGCATTTGTGAATATATTTGGTTGCATGTTTTATCTCCAATATCTTTGTAT  
>HPV92\_Beta\_27531786\_nt1461\_Genome\_Tile|1  
ATATATTTGGTTGCATGTTTTATCTCCAATATCTTTGTATTTACTATGTTTTAAACTGG  
>HPV92\_Beta\_27531786\_nt1481\_Genome\_Tile|1  
TATCTCCAATATCTTTGTATTTACTATGTTTTAAACTGGAAAAGCAGAAATACTGTAA  
>HPV92\_Beta\_27531786\_nt1501\_Genome\_Tile|1  
TTACTATGTTTTAAACTGGAAAAGCAGAAATACTGTAAAGAACTTGTTGATGTCCATT  
>HPV92\_Beta\_27531786\_nt1521\_Genome\_Tile|1  
AAAAAGCAGAAATACTGTAAAGAACTTGTTGATGTCCATTTTAAATGTTGGGGATGCACA

>HPV92\_Beta\_27531786\_nt1561\_Genome\_Tile|1  
TTAAATGTTGGGGATGCACAGCTTATAGCTGATCCACCCAGATTTCGACGCGTAGTAGCA  
>HPV92\_Beta\_27531786\_nt1601\_Genome\_Tile|1  
AGATTTCGACGCGTAGTAGCAGCTTTGTTTTGGTACAAAGAATCTATGAATAAAAATGTAT  
>HPV92\_Beta\_27531786\_nt1621\_Genome\_Tile|1  
GCTTTGTTTTGGTACAAAGAATCTATGAATAAAAATGTATATACCCATGGAGAATACCCA  
>HPV92\_Beta\_27531786\_nt1661\_Genome\_Tile|1  
ATACCCATGGAGAATACCCAGAGTGGATAGCAAATCAAACATTGCTTTCTCATCAGGAAT  
>HPV92\_Beta\_27531786\_nt1681\_Genome\_Tile|1  
GAGTGGATAGCAAATCAAACATTGCTTTCTCATCAGGAATATGAAACACAGCAATTTGAT  
>HPV92\_Beta\_27531786\_nt1701\_Genome\_Tile|1  
ATTGCTTTCTCATCAGGAATATGAAACACAGCAATTTGATTTAAGTAGAATGATTCAGTG  
>HPV92\_Beta\_27531786\_nt1921\_Genome\_Tile|1  
ATGAAAAATATGAGTATGTCAGCCTGGATTTATACTAGATTGAAATCAATTGAAGGACCA  
>HPV92\_Beta\_27531786\_nt1941\_Genome\_Tile|1  
AGCCTGGATTTATACTAGATTGAAATCAATTGAAGGACCAGGCCATTGGTCAGACATTGT  
>HPV92\_Beta\_27531786\_nt1961\_Genome\_Tile|1  
TGAAATCAATTGAAGGACCAGGCCATTGGTCAGACATTGTTAAATTTATACGATTTTCAGC  
>HPV92\_Beta\_27531786\_nt2001\_Genome\_Tile|1  
TAAATTTATACGATTTTCAGCAGATTAATTTTATAATGTTTCTAGATGTATTCAAGCAATT  
>HPV92\_Beta\_27531786\_nt2201\_Genome\_Tile|1  
TATCTCCATTAGTAGAATCTAAATTCGACTACTAGATGATGCCACCGAGTGCTGTTGGA  
>HPV92\_Beta\_27531786\_nt2281\_Genome\_Tile|1  
AGAAATGGAATAGATGGTAACATGGTTAGTGTGGATTGTAAGCATAAAAAATCCGGTCCAA  
>HPV92\_Beta\_27531786\_nt2321\_Genome\_Tile|1  
AGCATAAAAAATCCGGTCCAAATTAGATTTCCACCATTATTGATTACATCAAATAATAATA  
>HPV92\_Beta\_27531786\_nt2341\_Genome\_Tile|1  
ATTAGATTTCCACCATTATTGATTACATCAAATAATAATATAATGTCTGATCCAAAGTAT  
>HPV92\_Beta\_27531786\_nt2361\_Genome\_Tile|1  
GATTACATCAAATAATAATATAATGTCTGATCCAAAGTATAAATATCTGCATAGTAGAAT  
>HPV92\_Beta\_27531786\_nt2381\_Genome\_Tile|1  
TAATGTCTGATCCAAAGTATAAATATCTGCATAGTAGAATTAAAGCATTGAGTTTGTA  
>HPV92\_Beta\_27531786\_nt2401\_Genome\_Tile|1  
AAATATCTGCATAGTAGAATTAAAGCATTGAGTTTGTAATAAGTTTCCATTTAAGGAC  
>HPV92\_Beta\_27531786\_nt2601\_Genome\_Tile|1  
ACAAGTTAATGACAATTTATGAAAGAGCTAGTGAATCCTTAAAAGATCAAATTGAACATT  
>HPV92\_Beta\_27531786\_nt2621\_Genome\_Tile|1  
GAAAGAGCTAGTGAATCCTTAAAAGATCAAATTGAACATTGGAACCTGTTAAGACAGGAG  
>HPV92\_Beta\_27531786\_nt2681\_Genome\_Tile|1  
CAGGTGTTATTTTCATTATGCCAGACAAAAGAGGAGTATTGCGCCTTGGTTATCAGCCAGTA  
>HPV92\_Beta\_27531786\_nt2701\_Genome\_Tile|1  
CAGACAAAGAGGAGTATTGCGCCTTGGTTATCAGCCAGTACCTGCATTAAC TATTT CAGA  
>HPV92\_Beta\_27531786\_nt2721\_Genome\_Tile|1  
GCCTTGGTTATCAGCCAGTACCTGCATTAAC TATTT CAGAGGCTAAAGCTAAGGAAGCCA  
>HPV92\_Beta\_27531786\_nt2741\_Genome\_Tile|1  
CCTGCATTAAC TATTT CAGAGGCTAAAGCTAAGGAAGCCATTGCTATGGTTTTACATTTA  
>HPV92\_Beta\_27531786\_nt2761\_Genome\_Tile|1  
GGCTAAAGCTAAGGAAGCCATTGCTATGGTTTTACATTTAGAAGCATTGCAAAGATCACC  
>HPV92\_Beta\_27531786\_nt2781\_Genome\_Tile|1  
TTGCTATGGTTTTACATTTAGAAGCATTGCAAAGATCACCTTACAAAAATGAAAAATGGA  
>HPV92\_Beta\_27531786\_nt2841\_Genome\_Tile|1  
CATTAGTAAATACAAGTGTAGAAACGTTTCGCACACCCCCAGAAAATTGTTTTAAAAAGG  
>HPV92\_Beta\_27531786\_nt2861\_Genome\_Tile|1  
GAAACGTTTTTCGCACACCCCCAGAAAATTGTTTTAAAAAGGGCCCTAAGACTATTGAAATA  
>HPV92\_Beta\_27531786\_nt2901\_Genome\_Tile|1

GCCCTAAGACTATTGAAATAGTGTATGATGGCAATCCTGAAAATACAATGTTATACACTA  
>HPV92\_Beta\_27531786\_nt2921\_Genome\_Tile|1  
GTGTATGATGGCAATCCTGAAAATACAATGTTATACACTATTTGGACACATATATATTTT  
>HPV92\_Beta\_27531786\_nt2961\_Genome\_Tile|1  
TTTGGACACATATATATTTTGAAGATGACGAAGGCAACTGGCAAAAGACTGAGGGACATT  
>HPV92\_Beta\_27531786\_nt2981\_Genome\_Tile|1  
GAAGATGACGAAGGCAACTGGCAAAAGACTGAGGGACATTTGGACTATCATGGTGCCTAT  
>HPV92\_Beta\_27531786\_nt3001\_Genome\_Tile|1  
GCAAAAGACTGAGGGACATTTGGACTATCATGGTGCCTATTTTATGGATGGATTAAATAA  
>HPV92\_Beta\_27531786\_nt3021\_Genome\_Tile|1  
TGGACTATCATGGTGCCTATTTTATGGATGGATTAAATAAACAATACTATATCAGATTTG  
>HPV92\_Beta\_27531786\_nt3041\_Genome\_Tile|1  
TTTATGGATGGATTAAATAAACAATACTATATCAGATTTGCTCAAGACGCACGCAGATTT  
>HPV92\_Beta\_27531786\_nt3061\_Genome\_Tile|1  
ACAATACTATATCAGATTTGCTCAAGACGCACGCAGATTTAGTGAAACTGGAGAATGGGA  
>HPV92\_Beta\_27531786\_nt3221\_Genome\_Tile|1  
CTTTCGCAGACATCCGGAGGACAGTCCCCTGTACCCACTCAACGGAAGCAACCATCTAAA  
>HPV92\_Beta\_27531786\_nt3341\_Genome\_Tile|1  
CCGAAAGCGTCACCGAGGAGATCAGATCGCGGTCAGGATCGAGATCGGGATCACAAGGA  
>HPV92\_Beta\_27531786\_nt3421\_Genome\_Tile|1  
AGTCAGACGCGGAGAACGGGAACGGGGACAAGGAAGGGGACAAGGAAGCCGGGGTCGGGG  
>HPV92\_Beta\_27531786\_nt3441\_Genome\_Tile|1  
AACGGGGACAAGGAAGGGGACAAGGAAGCCGGGGTCGGGGAAGGAGCGGGGACAGAAGCA  
>HPV92\_Beta\_27531786\_nt3581\_Genome\_Tile|1  
AGAGCAGCCTCCAGAGGCCGTAGAGGGTACAGCAACAGGAGGTCAAGATCCAAATCTGTT  
>HPV92\_Beta\_27531786\_nt3601\_Genome\_Tile|1  
TAGAGGGTACAGCAACAGGAGGTCAAGATCCAAATCTGTTGGCACAAGTGGCATAACCACC  
>HPV92\_Beta\_27531786\_nt3741\_Genome\_Tile|1  
ATCCCCCAGTAATTTTGTGAAAGGACAAGCCAATACTCTTAAGTGTATCGCTACAGGG  
>HPV92\_Beta\_27531786\_nt3761\_Genome\_Tile|1  
AAAGGACAAGCCAATACTCTTAAGTGTATCGCTACAGGGCTAAAGAAAAGTATAAAGGC  
>HPV92\_Beta\_27531786\_nt3781\_Genome\_Tile|1  
TAAGTGTATCGCTACAGGGCTAAAGAAAAGTATAAAGGCTATTATGATTGCTTCAGTAC  
>HPV92\_Beta\_27531786\_nt3801\_Genome\_Tile|1  
CTAAAGAAAAGTATAAAGGCTATTATGATTGCTTCAGTACTACATGGTCATGGGTCAGTG  
>HPV92\_Beta\_27531786\_nt3861\_Genome\_Tile|1  
CAGGTAGCAACGATAGAATAGGACGCTCTAGAATGATTATTAGCTTTACCAGTAAATCTC  
>HPV92\_Beta\_27531786\_nt3921\_Genome\_Tile|1  
AAAGACAAATGTTTTTAAGTATTATGAAATTACCAAAGGGCGTTGATTGGTCTCTTGGGT  
>HPV92\_Beta\_27531786\_nt3961\_Genome\_Tile|1  
CGTTGATTGGTCTCTTGGGTGCTTTGACTCTATTTAACACACTAACCTTTCTAGTTTTTT  
>HPV92\_Beta\_27531786\_nt3981\_Genome\_Tile|1  
GCTTTGACTCTATTTAACACACTAACCTTTCTAGTTTTTTTACTAACACATACGTTTCAA  
>HPV92\_Beta\_27531786\_nt4241\_Genome\_Tile|1  
CACTGGTGGTAGCACTGGATATGGGCCATTAGGTGAAGGGACGAGTGTAAGAGTTGGAAA  
>HPV92\_Beta\_27531786\_nt4261\_Genome\_Tile|1  
ATGGGCCATTAGGTGAAGGGACGAGTGTAAGAGTTGGAAATACACCCACAGTTATTAGGC  
>HPV92\_Beta\_27531786\_nt4321\_Genome\_Tile|1  
CTGCTTTGGTGCCCTGAGGCTATAGGACCAAGTGAACATAATACCTATTGACAGTGTCAATC  
>HPV92\_Beta\_27531786\_nt4341\_Genome\_Tile|1  
ATAGGACCAAGTGAACATAATACCTATTGACAGTGTCAATCCTATTGACCCCAGTGCTTCT  
>HPV92\_Beta\_27531786\_nt4361\_Genome\_Tile|1  
ACCTATTGACAGTGTCAATCCTATTGACCCCAGTGCTTCTTCTATCATACCTTTAACAGA  
>HPV92\_Beta\_27531786\_nt4381\_Genome\_Tile|1  
CTATTGACCCCAGTGCTTCTTCTATCATACCTTTAACAGAGTCAACAGGTCCTGACCTCT



>HPV92\_Beta\_27531786\_nt4401\_Genome\_Tile|1  
TCTATCATACCTTTTAACAGAGTCAACAGGTCCTGACCTCTTACCAGGTGAAATAGAAACA  
>HPV92\_Beta\_27531786\_nt4461\_Genome\_Tile|1  
ATTGCAGAGGTGCATCCTGCCCCTGACATACCTACAGTAGATACACCAGTGGTGACTGGG  
>HPV92\_Beta\_27531786\_nt4561\_Genome\_Tile|1  
GTCCACCCACACGAAACAGAGTTAGTAGAACACAATATAACAATCCTGCATTTCAAATCA  
>HPV92\_Beta\_27531786\_nt4601\_Genome\_Tile|1  
CAATCCTGCATTTCAAATCATATCTGAAACTACACCAAGTGCGGGGGAAACGTCCCTATC  
>HPV92\_Beta\_27531786\_nt4681\_Genome\_Tile|1  
CATTTTGATGGTGGACAATATATAGGTGGTAACCCACCTCCGCGATCAGTAGTTGAAATAG  
>HPV92\_Beta\_27531786\_nt4701\_Genome\_Tile|1  
ATAGGTGGTAACCCACCTCCGCGATCAGTAGTTGAAATAGAATTACAAGAAATTCCTCA  
>HPV92\_Beta\_27531786\_nt4801\_Genome\_Tile|1  
AAACAAGCACTCCTGTGACAGGCACAACAAATGGCCTCAGCATTACGGAGGGCTTTAT  
>HPV92\_Beta\_27531786\_nt4841\_Genome\_Tile|1  
AGCATTACGGAGGGCTTTATACAATAGAAGGTTTACACAGCAGGTTCAAGTGAAGATCC  
>HPV92\_Beta\_27531786\_nt4861\_Genome\_Tile|1  
ACAATAGAAGGTTTACACAGCAGGTTCAAGTGAAGATCCAATGTTTTATAGTAGACCTT  
>HPV92\_Beta\_27531786\_nt4881\_Genome\_Tile|1  
CAGGTTCAAGTGAAGATCCAATGTTTTATAGTAGACCTTCCAGGTTAGTTAGGTTTCAA  
>HPV92\_Beta\_27531786\_nt5041\_Genome\_Tile|1  
AACTTGGTAGGCCTACCTATGCTGAAACACCTGCAGGCTATATAAGGGTTAGCAGACTTG  
>HPV92\_Beta\_27531786\_nt5061\_Genome\_Tile|1  
GCTGAAACACCTGCAGGCTATATAAGGGTTAGCAGACTTGGCAAACGAGCTACTATAAGG  
>HPV92\_Beta\_27531786\_nt5081\_Genome\_Tile|1  
TATAAGGGTTAGCAGACTTGGCAAACGAGCTACTATAAGGACCAGGTCTGGAACACAAT  
>HPV92\_Beta\_27531786\_nt5121\_Genome\_Tile|1  
ACCAGGTCTGGAACACAATAGGCGGTGAGGTACATTTTTTTTAGGGATATTAGCAGTATT  
>HPV92\_Beta\_27531786\_nt5141\_Genome\_Tile|1  
AGGCGGTGAGGTACATTTTTTTTAGGGATATTAGCAGTATTGATACTCAACCTTCTATTGA  
>HPV92\_Beta\_27531786\_nt5161\_Genome\_Tile|1  
TTAGGGATATTAGCAGTATTGATACTCAACCTTCTATTGAACTGCAAGTTCTTGGGGAAC  
>HPV92\_Beta\_27531786\_nt5241\_Genome\_Tile|1  
GTCCAGGGTCCTGTGGAAAGTACGTTTCGTAAATATTGATTTGGAAGAGTTACCTAATTTA  
>HPV92\_Beta\_27531786\_nt5281\_Genome\_Tile|1  
TGGAAGAGTTACCTAATTTAGAGGAAAATGTACACCTAGAATCTGATGATATACTTATTG  
>HPV92\_Beta\_27531786\_nt5381\_Genome\_Tile|1  
TGGAAATTCTAGAAGATCAAATACTGTTACATTACCTCGCTTTGAAACTGTAAGGGAAAC  
>HPV92\_Beta\_27531786\_nt5401\_Genome\_Tile|1  
ATACTGTTACATTACCTCGCTTTGAAACTGTAAGGGAAACTTCTTTATATACTGTAGATT  
>HPV92\_Beta\_27531786\_nt5421\_Genome\_Tile|1  
TTTGAAACTGTAAGGGAAACTTCTTTATATACTGTAGATTTAGATGGATTCCATGTGTCT  
>HPV92\_Beta\_27531786\_nt5441\_Genome\_Tile|1  
TTCTTTATATACTGTAGATTTAGATGGATTCCATGTGTCTTATCCTGAGAGTAGAGCGTA  
>HPV92\_Beta\_27531786\_nt5461\_Genome\_Tile|1  
TAGATGGATTCCATGTGTCTTATCCTGAGAGTAGAGCGTATCCAGAAGTTATTCCTACAG  
>HPV92\_Beta\_27531786\_nt5481\_Genome\_Tile|1  
TATCCTGAGAGTAGAGCGTATCCAGAAGTTATTCCTACAGAACCAGATAATACCCCAACA  
>HPV92\_Beta\_27531786\_nt5641\_Genome\_Tile|1  
TCCTATTGGCTTCCAGCAAATGGTAAGGTATACTTACCCCTTCAACACCGGTTGCAAGG  
>HPV92\_Beta\_27531786\_nt5761\_Genome\_Tile|1  
CGCCTGCTGACAGTTGGACACCCTTATTTTGAAGTGAGAAGCTCAGTTGATCCACATGAT  
>HPV92\_Beta\_27531786\_nt6041\_Genome\_Tile|1  
ATAAGTACAATACTGGAACAAAGGATGACAGAGTAAACACATCTTTTGATCCAAAGCAAA  
>HPV92\_Beta\_27531786\_nt6081\_Genome\_Tile|1

ATCTTTTGGATCCAAAGCAAATTCAGTTATTTGTTTTAGGATGTACACCATGCTTAGGTGA  
>HPV92\_Beta\_27531786\_nt6161\_Genome\_Tile|1  
CATGTGCTGAAAAGCAACCAGATACTGGGGGATGCCACCATTAGAGTTAAAAAAGCTG  
>HPV92\_Beta\_27531786\_nt6221\_Genome\_Tile|1  
TTATCTCTGATGGAGATATGGTTGACATAGGCTTCGGTAATATGAATTTTAAGGCCTTAT  
>HPV92\_Beta\_27531786\_nt6241\_Genome\_Tile|1  
GTTGACATAGGCTTCGGTAATATGAATTTTAAGGCCTTATCAGTAACCAAATCTGACGTA  
>HPV92\_Beta\_27531786\_nt6261\_Genome\_Tile|1  
TATGAATTTTAAGGCCTTATCAGTAACCAAATCTGACGTAAGTTTGGATATAGTAGACTC  
>HPV92\_Beta\_27531786\_nt6441\_Genome\_Tile|1  
GGGTGATACCATCCCAGATGCAGTTGTAAATGAAGACCATAACTTTATGTTACCTGCAGC  
>HPV92\_Beta\_27531786\_nt6461\_Genome\_Tile|1  
CAGTTGTAAATGAAGACCATAACTTTATGTTACCTGCAGCATCCAGTGACCAGTCTAGAA  
>HPV92\_Beta\_27531786\_nt6481\_Genome\_Tile|1  
AACTTTATGTTACCTGCAGCATCCAGTGACCAGTCTAGAAGTCAAATTGCCAGTTCTATC  
>HPV92\_Beta\_27531786\_nt6641\_Genome\_Tile|1  
GCTGGAGTAATGAAGTGTCTGACAGTTTGTGATAATACCAGGAATACTAACTTTAATA  
>HPV92\_Beta\_27531786\_nt6661\_Genome\_Tile|1  
CTGACAGTTTGTGATAATACCAGGAATACTAACTTTAATATTAGTGTCCCTAAGGAAGGT  
>HPV92\_Beta\_27531786\_nt6681\_Genome\_Tile|1  
CAGGAATACTAACTTTAATATTAGTGTCCCTAAGGAAGGTGGTCAAATAACCGACTATGA  
>HPV92\_Beta\_27531786\_nt6701\_Genome\_Tile|1  
TTAGTGTCCCTAAGGAAGGTGGTCAAATAACCGACTATGATTCACAAAAGATTAGAGAAT  
>HPV92\_Beta\_27531786\_nt6721\_Genome\_Tile|1  
GGTCAAATAACCGACTATGATTCACAAAAGATTAGAGAATACACTAGACATGTTGAAGAA  
>HPV92\_Beta\_27531786\_nt6741\_Genome\_Tile|1  
TTCACAAAAGATTAGAGAATACACTAGACATGTTGAAGAATATGAAATATCACTAATATT  
>HPV92\_Beta\_27531786\_nt7061\_Genome\_Tile|1  
CATTGGGTAGAAAATTTTTATTTCAAGCTGGATTAACTAATACATCTGTTAATGGTCTTA  
>HPV92\_Beta\_27531786\_nt7081\_Genome\_Tile|1  
TTTCAAGCTGGATTAACTAATACATCTGTTAATGGTCTTAAAAGAACTAGAAGCAGTTCT  
>HPV92\_Beta\_27531786\_nt7101\_Genome\_Tile|1  
TACATCTGTTAATGGTCTTAAAAGAACTAGAAGCAGTTCTCAAAGAGGTACTAAACGAAA  
>HPV92\_Beta\_27531786\_nt7121\_Genome\_Tile|1  
AAAGAACTAGAAGCAGTTCTCAAAGAGGTACTAAACGAAAAAGAAAAAGTAACTAAACG  
>HPV92\_Beta\_27531786\_nt7141\_Genome\_Tile|1  
CAAAGAGGTACTAAACGAAAAAGAAAAAGTAACTAAACGGTCAGTATTCTTTATTGAAA  
>HPV92\_Beta\_27531786\_nt7201\_Genome\_Tile|1  
ATAAAATTTTTGGAATCATGTGTATGAGTAATGATTATTATCTATTCTGACTAACTCA  
>HPV92\_Beta\_27531786\_nt7241\_Genome\_Tile|1  
TATCTATTCTGACTAACTCAAACATGTTAACCGCGCCCGGTGTATTCAATATAAACGCTG  
>HPV92\_Beta\_27531786\_nt7261\_Genome\_Tile|1  
AACATGTTAACCGCGCCCGGTGTATTCAATATAAACGCTGATGGTACAAGTTGTCAAGGA  
>HPV92\_Beta\_27531786\_nt7281\_Genome\_Tile|1  
TGTATTCAATATAAACGCTGATGGTACAAGTTGTCAAGGAACCTGGCAGTCTGAACTACA  
>HPV92\_Beta\_27531786\_nt7301\_Genome\_Tile|1  
ATGGTACAAGTTGTCAAGGAACCTGGCAGTCTGAACTACAGTGGTGCCAACACCTGGAAG  
>HPV49\_Beta\_9627363\_nt0001\_Genome\_Tile|1  
CCACATTCGTTCCAGCTACATTTTGGCGCCAACCTCTTTGGCAGCAACACCAGAACGATAA  
>HPV49\_Beta\_9627363\_nt0081\_Genome\_Tile|1  
CGGTACATTATACTTAGTCATCTCTTGTGGTTGTTAACAACATCTTGAAACAGATATA  
>HPV49\_Beta\_9627363\_nt0121\_Genome\_Tile|1  
ACAATCTTGAAACAGATATACATGTAAACCGCTTGCGTGCTGTACTTTCTTTATTCTTGGA  
>HPV49\_Beta\_9627363\_nt0221\_Genome\_Tile|1  
TGTGAGCTAGCCCACCACTTAAATATACCTATTTGGGAAGTTTTGCTTCCTTGTAATTTT

>HPV49\_Beta\_9627363\_nt0241\_Genome\_Tile|1  
AAATATACCTATTTGGGAAGTTTTGCTTCCTTGTAATTTTTGCACGGGGTTTCTAACATA  
>HPV49\_Beta\_9627363\_nt0261\_Genome\_Tile|1  
TTTTGCTTCCTTGTAATTTTTGCACGGGGTTTCTAACATATCAGGAGTTGTTAGAATTTG  
>HPV49\_Beta\_9627363\_nt0301\_Genome\_Tile|1  
TCAGGAGTTGTTAGAATTTGACTATAAAGACTTTAATTTGCTGTGGAAAGACGGATTTGT  
>HPV49\_Beta\_9627363\_nt0321\_Genome\_Tile|1  
ACTATAAAGACTTTAATTTGCTGTGGAAAGACGGATTTGTCTTTGGTTGTTGTGCAGCTT  
>HPV49\_Beta\_9627363\_nt0341\_Genome\_Tile|1  
CTGTGGAAAGACGGATTTGTCTTTGGTTGTTGTGCAGCTTGTGCCTATAGATCAGCATAT  
>HPV49\_Beta\_9627363\_nt0381\_Genome\_Tile|1  
GTGCCTATAGATCAGCATATCACGAGTTTACTAATTATCACCAAGAAATTGTCGTAGGCA  
>HPV49\_Beta\_9627363\_nt0401\_Genome\_Tile|1  
CACGAGTTTACTAATTATCACCAAGAAATTGTCGTAGGCATCGAAATAGAAGGACGAGCA  
>HPV49\_Beta\_9627363\_nt0421\_Genome\_Tile|1  
CCAAGAAATTGTCGTAGGCATCGAAATAGAAGGACGAGCAGCGGCTAATATTGCTGAGAT  
>HPV49\_Beta\_9627363\_nt0441\_Genome\_Tile|1  
TCGAAATAGAAGGACGAGCAGCGGCTAATATTGCTGAGATAGTAGTCAGATGTCTCATTT  
>HPV49\_Beta\_9627363\_nt0481\_Genome\_Tile|1  
AGTAGTCAGATGTCTCATTTGCCTTAAGAGGCTAGATTTGTTGGAAAAGCTTGATATTTG  
>HPV49\_Beta\_9627363\_nt0801\_Genome\_Tile|1  
CAGACTGCGAGTCTTCGTGTTAGCCACTGACGCTGCTATTAGAAGTTTCCAAGAACTGCT  
>HPV49\_Beta\_9627363\_nt0821\_Genome\_Tile|1  
TAGCCACTGACGCTGCTATTAGAAGTTTCCAAGAACTGCTTCTGGAGGAACTGCAATTCT  
>HPV49\_Beta\_9627363\_nt1001\_Genome\_Tile|1  
TTGGAACAATTATTTGATGAAAGCCCCAAAGTCCAATATTTCAAATTTGTTAAATGATGAG  
>HPV49\_Beta\_9627363\_nt1581\_Genome\_Tile|1  
TGTGGATAAATATAAATGGGATTATGACTTTATATTTACTGTGTTTTAATCATGCAAAGA  
>HPV49\_Beta\_9627363\_nt1621\_Genome\_Tile|1  
GTGTTTTAATCATGCAAAGAGTAGAGAACTGTTGGTAGATTGCTTATGTCAATACTGGA  
>HPV49\_Beta\_9627363\_nt2121\_Genome\_Tile|1  
AGTTTATAAGATTTCAAGAAATAAACTTTATAATATTTCTGGATGCATTTAAACAGTTTA  
>HPV49\_Beta\_9627363\_nt2141\_Genome\_Tile|1  
ATAAACTTTATAATATTTCTGGATGCATTTAAACAGTTTATACATGGCAAACCTAAAAAA  
>HPV49\_Beta\_9627363\_nt2241\_Genome\_Tile|1  
CAATGTTTGCTATGTCATTATTAAGTTTAAAAAGGCAAGGTAATTTTCATTTGTAAATG  
>HPV49\_Beta\_9627363\_nt2441\_Genome\_Tile|1  
CATAAAACCCCTATGCAAATTAGGTTCCCAACCATTTGTTAATAAATTCAAATTATAATATT  
>HPV49\_Beta\_9627363\_nt2501\_Genome\_Tile|1  
AAAGCTAATGATAAATATAAGTTTTTGTACAGTAGAATTGCAATATTTGAATTTAAACAT  
>HPV49\_Beta\_9627363\_nt2781\_Genome\_Tile|1  
AAACTGTTAAGACAGGAACAAGCTTTATTATTTTTTGCACGTAAACACAGCATAATGAGA  
>HPV49\_Beta\_9627363\_nt2801\_Genome\_Tile|1  
AGCTTTATTATTTTTTGCACGTAAACACAGCATAATGAGACTGGGGTATCAACCCGTACC  
>HPV49\_Beta\_9627363\_nt2841\_Genome\_Tile|1  
CTGGGGTATCAACCCGTACCTCCGATGGCAGTATCTGAAACCAAAGCCAAACAAGCTATT  
>HPV49\_Beta\_9627363\_nt2861\_Genome\_Tile|1  
TCCGATGGCAGTATCTGAAACCAAAGCCAAACAAGCTATTGGCATGATGCTAACTTTGCA  
>HPV49\_Beta\_9627363\_nt2981\_Genome\_Tile|1  
AACATACAATGCACCACCAGCACAGTGCTTTAAAAAAGGTCCTTATAATATAGAAGTTAT  
>HPV49\_Beta\_9627363\_nt3121\_Genome\_Tile|1  
AAAAGGTGCAAGGTGAGGTGATTATGCAGGTGCATATTATAAGGATGGAACCTATCAAAC  
>HPV49\_Beta\_9627363\_nt3141\_Genome\_Tile|1  
GATTATGCAGGTGCATATTATAAGGATGGAACCTATCAAACAGTATTATGTTACCTTCGCT  
>HPV49\_Beta\_9627363\_nt3641\_Genome\_Tile|1

AGGATCTGTCACAACCTCCAGAGATTCCAGCCCCAAGAGAACCCGCAGGGGCAGAGGGAG  
>HPV49\_Beta\_9627363\_nt4041\_Genome\_Tile|1  
CGTATGCTTTTAAAGTTTACTTCAAACAGCACTAGATCACAGTATGTTAAAATTATGAAG  
>HPV49\_Beta\_9627363\_nt4161\_Genome\_Tile|1  
ATACTAACGGTGCCTTGCACTACTAACACATTAATCTTTTAACATTTTTATATTGCTTTTT  
>HPV49\_Beta\_9627363\_nt4181\_Genome\_Tile|1  
ACTAACACATTAATCTTTTAACATTTTTATATTGCTTTTTTATTTTTATATAATGGTGCG  
>HPV49\_Beta\_9627363\_nt4481\_Genome\_Tile|1  
TCCAAGTGTTGTTTCGTCCAGGTATACTCCCTGAGGCTATTGGTCCGGCGGATATCATTCC  
>HPV49\_Beta\_9627363\_nt4701\_Genome\_Tile|1  
GGCTCCAGTGCTGTATTGGAGGTTGCCTCTGAACCCACACCACCCACTCGCACCAGAATT  
>HPV49\_Beta\_9627363\_nt4721\_Genome\_Tile|1  
GGTTGCCTCTGAACCCACACCACCCACTCGCACCAGAATTTCCAGAACACAGTACCATAA  
>HPV49\_Beta\_9627363\_nt4741\_Genome\_Tile|1  
CACCCACTCGCACCAGAATTTCCAGAACACAGTACCATAATCCCTCTTTTCAAATATTAA  
>HPV49\_Beta\_9627363\_nt4821\_Genome\_Tile|1  
GGAGAATCTGCATTAACCTGATCATGTTGTTGTTACTAGTGGTCTGGTGGTCAACCAATA  
>HPV49\_Beta\_9627363\_nt4841\_Genome\_Tile|1  
TCATGTTGTTGTTACTAGTGGTCTGGTGGTCAACCAATAGGTGGAGTTACACCAGTTGA  
>HPV49\_Beta\_9627363\_nt4861\_Genome\_Tile|1  
GTTCTGGTGGTCAACCAATAGGTGGAGTTACACCAGTTGAAATAGAATTACAAGAACTTC  
>HPV49\_Beta\_9627363\_nt5021\_Genome\_Tile|1  
ACTATATAATAGGCGACTTACTCAACAAGTAAATGTCCAGGATCCATTATTCTTACAACA  
>HPV49\_Beta\_9627363\_nt5181\_Genome\_Tile|1  
GACAGAGACTTTTTAGATATAGCAAAATTAAGCCGCCCTCTTTACTCTGAAACACCACAG  
>HPV49\_Beta\_9627363\_nt5201\_Genome\_Tile|1  
AGCAAAATTAAGCCGCCCTCTTTACTCTGAAACACCACAGGGATATGTCAGGGTAAGCCG  
>HPV49\_Beta\_9627363\_nt5221\_Genome\_Tile|1  
TTTACTCTGAAACACCACAGGGATATGTCAGGGTAAGCCGCTTAGGTAATAGGGCTTCTA  
>HPV49\_Beta\_9627363\_nt5241\_Genome\_Tile|1  
GGATATGTCAGGGTAAGCCGCTTAGGTAATAGGGCTTCTATTAGAACACGTAGTGGAGCT  
>HPV49\_Beta\_9627363\_nt5281\_Genome\_Tile|1  
TTAGAACACGTAGTGGAGCTACAGTAGGGGCTCAAGTGCATTTTTATACAGATCTTAGCA  
>HPV49\_Beta\_9627363\_nt5301\_Genome\_Tile|1  
ACAGTAGGGGCTCAAGTGCATTTTTATACAGATCTTAGCACAATCGATGCAGAGGAGTCT  
>HPV49\_Beta\_9627363\_nt5321\_Genome\_Tile|1  
TTTTTATACAGATCTTAGCACAATCGATGCAGAGGAGTCTATAGAGTTATCACTATTAGG  
>HPV49\_Beta\_9627363\_nt5421\_Genome\_Tile|1  
GAAAGCTCATTTGTAGATTTAAATGTTTCAGGAACTGCCTCAAGTAATAGAAGTAGACCCA  
>HPV49\_Beta\_9627363\_nt5441\_Genome\_Tile|1  
AAATGTTTCAGGAACTGCCTCAAGTAATAGAAGTAGACCCAGAACCTACTTTCCACTCTGA  
>HPV49\_Beta\_9627363\_nt5461\_Genome\_Tile|1  
AAGTAATAGAAGTAGACCCAGAACCTACTTTCCACTCTGATGATTTGCTACTGGATGAGC  
>HPV49\_Beta\_9627363\_nt5521\_Genome\_Tile|1  
AAAATGAAGATTTTTCTGGCTCCCAGTTAGTTTATGGTAGTGGCAGGCGTTCTACCACAT  
>HPV49\_Beta\_9627363\_nt5541\_Genome\_Tile|1  
TCCCAGTTAGTTTATGGTAGTGGCAGGCGTTCTACCACATTTACTGTACCCCGCTTCTCT  
>HPV49\_Beta\_9627363\_nt5561\_Genome\_Tile|1  
TGGCAGGCGTTCTACCACATTTACTGTACCCCGCTTCTCTACTCCCAGATCTGATACCTT  
>HPV49\_Beta\_9627363\_nt5581\_Genome\_Tile|1  
TTACTGTACCCCGCTTCTCTACTCCCAGATCTGATACCTTTTATGTACAAGATTTGGAAG  
>HPV49\_Beta\_9627363\_nt5601\_Genome\_Tile|1  
ACTCCCAGATCTGATACCTTTTTATGTACAAGATTTGGAAGGTTATGCTGTGTCATATCCT  
>HPV49\_Beta\_9627363\_nt5621\_Genome\_Tile|1  
TTATGTACAAGATTTGGAAGGTTATGCTGTGTCATATCCTGAACGAAGGAATTATCCAGA

>HPV49\_Beta\_9627363\_nt5661\_Genome\_Tile|1  
GAACGAAGGAATTATCCAGAAATTATTTATCCTCAACCCGATTTGCCAACTGTAATAATT  
>HPV49\_Beta\_9627363\_nt5681\_Genome\_Tile|1  
AATTATTTATCCTCAACCCGATTTGCCAACTGTAATAATTCATACTGCAGATACCTCTGG  
>HPV49\_Beta\_9627363\_nt5701\_Genome\_Tile|1  
ATTTGCCAACTGTAATAATTCATACTGCAGATACCTCTGGGGACTTCTATTTACATCCAA  
>HPV34\_Alpha\_9627334\_nt0061\_Genome\_Tile|1  
CATATATAAGTGCCTGCAGTACACTGCTGGACAGATTGGGAAATGTTTTTTCCCAATCCTG  
>HPV34\_Alpha\_9627334\_nt0281\_Genome\_Tile|1  
ACTTGGGGTATGTCAACCGTGTTTACTGTTTACTCAAAGGTTAGACAATATAGAAGATA  
>HPV34\_Alpha\_9627334\_nt0301\_Genome\_Tile|1  
GTTTACTGTTTACTCAAAGGTTAGACAATATAGAAGATATAACCAATCAGTGTATGGAC  
>HPV34\_Alpha\_9627334\_nt0321\_Genome\_Tile|1  
GTTAGACAATATAGAAGATATAACCAATCAGTGTATGGACGGACGTTAGAGAATTTAACT  
>HPV34\_Alpha\_9627334\_nt1141\_Genome\_Tile|1  
TAAAAGACATGAATTGAAACACAAACAGCGTAGTCCACATATATTGACGATAAGGGACAC  
>HPV34\_Alpha\_9627334\_nt1161\_Genome\_Tile|1  
ACAAACAGCGTAGTCCACATATATTGACGATAAGGGACACTAATACTACATCTACACACC  
>HPV34\_Alpha\_9627334\_nt1181\_Genome\_Tile|1  
ATATTGACGATAAGGGACACTAATACTACATCTACACACCTATTGTGTGAGGAACAAGAC  
>HPV34\_Alpha\_9627334\_nt1301\_Genome\_Tile|1  
TGTTTACAAAGTACTAGCAGTAGTAACAACGGCAGCCAAATGGCGTCGCCAGGGGAAACA  
>HPV34\_Alpha\_9627334\_nt1401\_Genome\_Tile|1  
TGGAAAGCACACCTATAACGGACATTACAAACATATTAAGTAGTAATGTAAAGGCAA  
>HPV34\_Alpha\_9627334\_nt1421\_Genome\_Tile|1  
GACATTACAAACATATTAAGTAGTAATGTAAAGGCAACATTATTAGCAAAATTTAAA  
>HPV34\_Alpha\_9627334\_nt1581\_Genome\_Tile|1  
CATTGGCAGAAAGTTTAAATCATTACTAACCCAATATTGCCTATACATACATCTACAAT  
>HPV34\_Alpha\_9627334\_nt1621\_Genome\_Tile|1  
CCTATACATACATCTACAATGTTTAAACATGTTTCGTGGGGTATAATAGTATTATTGTTAGC  
>HPV34\_Alpha\_9627334\_nt2161\_Genome\_Tile|1  
GAAACATATTGTGCAATTTTTAAGATATCAGCAGGTTGAATTTGTACCGTTTTTAATTGC  
>HPV34\_Alpha\_9627334\_nt3121\_Genome\_Tile|1  
TGCAATATGTGGTATGGACATTTGTGTATTATTGGTTGGAAGGCAAGTGGTATAAAGTGA  
>HPV34\_Alpha\_9627334\_nt3141\_Genome\_Tile|1  
TTTGTGTATTATTGGTTGGAAGGCAAGTGGTATAAAGTGAGTAGCCATGTAGATTATAAT  
>HPV34\_Alpha\_9627334\_nt3161\_Genome\_Tile|1  
AGGCAAGTGGTATAAAGTGAGTAGCCATGTAGATTATAATGGTATATATTATGAAACACA  
>HPV34\_Alpha\_9627334\_nt3221\_Genome\_Tile|1  
GGACAATGAAAAGGTATATTATACACAATTTGACAGAGATGCAAAACGATATGGGGTTAA  
>HPV34\_Alpha\_9627334\_nt3441\_Genome\_Tile|1  
TGTGACCCAGACGAGGGGCCCTTGGACTTTGTACATAACCTACAGCCCACAACAGACTCA  
>HPV34\_Alpha\_9627334\_nt3661\_Genome\_Tile|1  
GTGGTGTAAATTACATTTATGTTTCCAGTACATCCCAACAAAAACAATTTTACAATGTG  
>HPV34\_Alpha\_9627334\_nt3701\_Genome\_Tile|1  
AAAACAATTTTACAATGTGCTAAAATACCACCAACTATATCAGTGTATCAGGGTATAT  
>HPV34\_Alpha\_9627334\_nt3761\_Genome\_Tile|1  
GTCCATATAACACAAATATGTAACATTGGTTACAATTGTATACATTGGTATACTGTATAA  
>HPV34\_Alpha\_9627334\_nt3781\_Genome\_Tile|1  
TAACATTGGTTACAATTGTATACATTGGTATACTGTATAATGTATGATCATTTTTTATAT  
>HPV34\_Alpha\_9627334\_nt3901\_Genome\_Tile|1  
TGTGTGTTTATGCATGGTTATTGCTTTTGTATTATAATTACTTTTTTACATGTGTCCCAAT  
>HPV34\_Alpha\_9627334\_nt3921\_Genome\_Tile|1  
TTGCTTTTGATTATAATTACTTTTTTACATGTGTCCCAATCCCTGTTAAAAGTATATATA  
>HPV34\_Alpha\_9627334\_nt4341\_Genome\_Tile|1

CTACTCCATCTAGACCAGTTGAAATTCCTTTGCAACCTACCAGACCTCCTGTTATTACAT  
>HPV34\_Alpha\_9627334\_nt4441\_Genome\_Tile|1  
GGAGTCAAGTTTTATTGAAGCTGGTGTGCCAGGTCCTACCTCCATAGTGCCTTCTAGTTC  
>HPV34\_Alpha\_9627334\_nt5141\_Genome\_Tile|1  
CTGCCTTCTGCATCTGCTACTGTAACAGATGCTAATGGCATTAAATGATGGGCTATATGAT  
>HPV34\_Alpha\_9627334\_nt5161\_Genome\_Tile|1  
TGTAACAGATGCTAATGGCATTAAATGATGGGCTATATGATGTATTGTTAGATAATAATGT  
>HPV34\_Alpha\_9627334\_nt5201\_Genome\_Tile|1  
GTATTGTTAGATAATAATGTAGATATTACTGAAGTGGAACACCTACTGGTACAAACACA  
>HPV34\_Alpha\_9627334\_nt5241\_Genome\_Tile|1  
CACCTACTGGTACAAACACACAAAGTGTTTTTGCAAGTGAGATTTCCACTACAACCTGCAA  
>HPV34\_Alpha\_9627334\_nt5261\_Genome\_Tile|1  
CAAAGTGTTTTTGCAAGTGAGATTTCCACTACAACCTGCAAATACCACTATTCCTTTAAAT  
>HPV34\_Alpha\_9627334\_nt5341\_Genome\_Tile|1  
TGGCCCTGATATTGCTTTACCTGTACCTACTGCAGAAACCATTTTACCCCAACTGTACC  
>HPV34\_Alpha\_9627334\_nt5421\_Genome\_Tile|1  
TATATATATATGGGTCCGATTTTATATTGCATCCTAGCTTGTATGTCATTCCACGCAAAC  
>HPV34\_Alpha\_9627334\_nt5881\_Genome\_Tile|1  
TTGAGGATACTGAAAATGCTGCAAAATATATTGGTGGAACATAGCAGATAGTAGGGAGT  
>HPV34\_Alpha\_9627334\_nt5901\_Genome\_Tile|1  
GCAAAATATATTGGTGGAACATAGCAGATAGTAGGGAGTGTATGTCAGTAGATTATAAA  
>HPV34\_Alpha\_9627334\_nt6541\_Genome\_Tile|1  
CACAATCCACAAGTACAACCTGCACCATATGCAAACAGTAATTTTAAGGAATACCTCAGAC  
>HPV34\_Alpha\_9627334\_nt7061\_Genome\_Tile|1  
GTATATGTTTGTGTATGTGTATTGTGTGTTTGTATATGTTATGTAATGTATGTATTATTG  
>HPV34\_Alpha\_9627334\_nt7081\_Genome\_Tile|1  
ATTGTGTGTTTGTATATGTTATGTAATGTATGTATTATTGTATTGTTGTATGTGGTGTGG  
>HPV34\_Alpha\_9627334\_nt7301\_Genome\_Tile|1  
CTTTCGGTTGCCTATACTATAACATGTTTGGTCTGTTTGTGCTGTTTGTAGCACAAAGGT  
>HPV34\_Alpha\_9627334\_nt7321\_Genome\_Tile|1  
AACATGTTTTGGTCTGTTTGTGCTGTTTGTAGCACAAAGGTTTAATGTGTTTTGGCTTCCT  
>HPV34\_Alpha\_9627334\_nt7401\_Genome\_Tile|1  
TCAAGCACTTAGGATTAACATGCTTCCTGCTTATGTTTCATCCTACGCAAGGTCATACAC  
>HPV34\_Alpha\_9627334\_nt7601\_Genome\_Tile|1  
CATTGTATTTTACATGCCAGGTAATTGTTGAAAACCTGACTAAGCAGTGCTTACTCATTTT  
>HPV34\_Alpha\_9627334\_nt7621\_Genome\_Tile|1  
GTAATTGTTGAAAACCTGACTAAGCAGTGCTTACTCATTTTGCACCTGGACTGTTAAACCG  
>HPV34\_Alpha\_9627334\_nt7661\_Genome\_Tile|1  
GCACCTGGACTGTTAAACCGTTTTGGATCACACAGTGTACCAACCCCTTTTATAATTATAA  
>HPV32\_Alpha\_9627327\_nt0181\_Genome\_Tile|1  
TACAAATCTGCTGTATTTGGTGTAAAAACCACTTAACCAGTGCTGAAGCGTATGCATATC  
>HPV32\_Alpha\_9627327\_nt0201\_Genome\_Tile|1  
TGTA AAAAACCCTTAACCAGTGCTGAAGCGTATGCATATCATTTTAAAGATTTGCACGTA  
>HPV32\_Alpha\_9627327\_nt0221\_Genome\_Tile|1  
TGCTGAAGCGTATGCATATCATTTTAAAGATTTGCACGTAGTGTGAAGAAAGGCTTTCC  
>HPV32\_Alpha\_9627327\_nt0261\_Genome\_Tile|1  
GTGTGAAGAAAGGCTTTCCATATGCCGCTGTGCCTTCTGCTTAGAATTTTATTCTAAA  
>HPV32\_Alpha\_9627327\_nt0361\_Genome\_Tile|1  
ATACAGTAGAACAAGAAACAGGACTACTGTTGGAAGAACAATAATTCGCTGTGCTATAT  
>HPV32\_Alpha\_9627327\_nt0401\_Genome\_Tile|1  
AATAATTCGCTGTGCTATATGTCAAAAGCCTTTATCGCCAAGTGAGAAAGATCATCATAT  
>HPV32\_Alpha\_9627327\_nt0421\_Genome\_Tile|1  
GTCAAAAAGCCTTTATCGCCAAGTGAGAAAGATCATCATATTTATAACGGACGGCATTTCA  
>HPV32\_Alpha\_9627327\_nt0441\_Genome\_Tile|1  
AGTGAGAAAGATCATCATATTTATAACGGACGGCATTTTCAGATTCATTTTAAATAGGTGG

>HPV32\_Alpha\_9627327\_nt0521\_Genome\_Tile|1  
CAGAGAATAATGCGTGGAAACGCACCAACGCTAAAGGACATTATTTTGTATGACCTGCCA  
>HPV32\_Alpha\_9627327\_nt0961\_Genome\_Tile|1  
AATGTAGAGGACAGCGGGTTGGACCTCGTAGATTTTGTAGACGACAGCAGAATAATACCT  
>HPV32\_Alpha\_9627327\_nt1001\_Genome\_Tile|1  
ACGACAGCAGAATAATACCTACAAATCAATTAAAGGCGCAGGCATTATTAAATAGGCAAC  
>HPV32\_Alpha\_9627327\_nt1681\_Genome\_Tile|1  
AAGAATCGCACCACAGTGTCTAAAGGAATGTGCAAACCTATTAAATATACCTGCTAATCAA  
>HPV32\_Alpha\_9627327\_nt2081\_Genome\_Tile|1  
AACGTATGTCAATGCCACAGTGGATTAAACATAGAAGTGAAAGAACTGGCGATAATGGTG  
>HPV32\_Alpha\_9627327\_nt2781\_Genome\_Tile|1  
AAGATAGTAAACATTTAGAAAAACATGTGCAGCACTGGAAGTGTTTACGCATAGAAGCAG  
>HPV32\_Alpha\_9627327\_nt2821\_Genome\_Tile|1  
GTGTTTACGCATAGAAGCAGCCTTATTATTTAAGGCTCGTGAAATGGGCTATGCACAAGT  
>HPV32\_Alpha\_9627327\_nt3341\_Genome\_Tile|1  
GCAGAGGTATCCTCTTCTGGACTTACTGAATTGGTACAAACCACCGACCTATACAACACC  
>HPV32\_Alpha\_9627327\_nt3421\_Genome\_Tile|1  
CACAAGGAGTAACTGCGACCCAGACGGCACAGACGGAATATTATACAAAGACCCCCACCCC  
>HPV32\_Alpha\_9627327\_nt3521\_Genome\_Tile|1  
CCACCAACAAAGCACCTGCAGCACTACGGCGTCACAAACGTACCCGTGGACCCCGGATCG  
>HPV32\_Alpha\_9627327\_nt3541\_Genome\_Tile|1  
GCACTACGGCGTCACAAACGTACCCGTGGACCCCGGATCGCAAAGGGTCACATCTGACAA  
>HPV32\_Alpha\_9627327\_nt3581\_Genome\_Tile|1  
CAAAGGGTCACATCTGACAATAACAATAACCAGCGACGGAACCCGTGTGGAAATCAGACT  
>HPV32\_Alpha\_9627327\_nt3661\_Genome\_Tile|1  
AGGTGATCCTAATTGCCTAAAGTGTTTAAGGTGGAGGTTAAAGAAAAATTGTTCTCACTT  
>HPV32\_Alpha\_9627327\_nt3681\_Genome\_Tile|1  
AGTGTTTAAGGTGGAGGTTAAAGAAAAATTGTTCTCACTTATTTACTCAAGTGTCATCCA  
>HPV32\_Alpha\_9627327\_nt3701\_Genome\_Tile|1  
AAGAAAAATTGTTCTCACTTATTTACTCAAGTGTCATCCACATGGCACCTGACAGAAAAA  
>HPV32\_Alpha\_9627327\_nt3721\_Genome\_Tile|1  
ATTTACTCAAGTGTCATCCACATGGCACCTGACAGAAAAAGACTATACACGTGACTCAAA  
>HPV32\_Alpha\_9627327\_nt3761\_Genome\_Tile|1  
GACTATACACGTGACTCAAAGGATGGTATAATAACAATTCATTATTATAATGAGGAACAA  
>HPV32\_Alpha\_9627327\_nt3781\_Genome\_Tile|1  
GGATGGTATAATAACAATTCATTATTATAATGAGGAACAACGAGATAAGTTTTTAAGTAC  
>HPV32\_Alpha\_9627327\_nt3801\_Genome\_Tile|1  
ATTATTATAATGAGGAACAACGAGATAAGTTTTTAAGTACTGTAAAACTTCCTCCTGGTA  
>HPV32\_Alpha\_9627327\_nt3821\_Genome\_Tile|1  
CGAGATAAGTTTTTAAGTACTGTAAAACTTCCTCCTGGTATTAAATCTTGCATTGGGTAC  
>HPV32\_Alpha\_9627327\_nt3841\_Genome\_Tile|1  
TGTAAAACTTCCTCCTGGTATTAAATCTTGCATTGGGTACATGTCAATGTTACAATTTAT  
>HPV32\_Alpha\_9627327\_nt3861\_Genome\_Tile|1  
TTAAATCTTGCATTGGGTACATGTCAATGTTACAATTTATGTAGTGTGTACATATGTACA  
>HPV32\_Alpha\_9627327\_nt3881\_Genome\_Tile|1  
ATGTCAATGTTACAATTTATGTAGTGTGTACATATGTACAAACATATATAGGGGAACATT  
>HPV32\_Alpha\_9627327\_nt3901\_Genome\_Tile|1  
GTAGTGTGTACATATGTACAAACATATATAGGGGAACATTACTGTGAGTCCACTATTGTG  
>HPV32\_Alpha\_9627327\_nt4081\_Genome\_Tile|1  
CTATCTAATATTAGTACTATTGTCCTGGTTGCAGCTACTAACATCTGTGCAATTTTTTTTT  
>HPV32\_Alpha\_9627327\_nt4101\_Genome\_Tile|1  
TGTCCTGGTTGCAGCTACTAACATCTGTGCAATTTTTTTTTTTTTAGCTTTGCTTGTGTGTTG  
>HPV32\_Alpha\_9627327\_nt4121\_Genome\_Tile|1  
ACATCTGTGCAATTTTTTTTTTTTTAGCTTTGCTTGTGTGTGTTTCTGCCTTTTTTACTA  
>HPV32\_Alpha\_9627327\_nt4141\_Genome\_Tile|1

TTTAGCTTTGCTTGTGTTGTGTTTCTGCCTTTTTACTAACCCTATTAATACACTTTGC  
>HPV32\_Alpha\_9627327\_nt4181\_Genome\_Tile|1  
ACCCTATTAATACACTTTGCACTACATTAATGTAGAAGGTGTACATACAATAGTATAGCT  
>HPV32\_Alpha\_9627327\_nt4221\_Genome\_Tile|1  
GTACATACAATAGTATAGCTGTGTGTGTGTGGTGTGCATGGTATACACAATAATTGTACA  
>HPV32\_Alpha\_9627327\_nt4241\_Genome\_Tile|1  
GTGTGTGTGTGGTGTGCATGGTATACACAATAATTGTACATACGTGATAATATGGTACAT  
>HPV32\_Alpha\_9627327\_nt4301\_Genome\_Tile|1  
TGTACTTTTAGAAAATGGCGATGTGTGGCTGCTGCTGTGGTTTTTAGCCACAGTGTATTAT  
>HPV32\_Alpha\_9627327\_nt4321\_Genome\_Tile|1  
TGTGTGGCTGCTGCTGTGGTTTTTAGCCACAGTGTATTATTTGTATATTAGTACTGTTGTT  
>HPV32\_Alpha\_9627327\_nt4341\_Genome\_Tile|1  
TTTTTAGCCACAGTGTATTATTTGTATATTAGTACTGTTGTTAACTACTGCAGACATACGT  
>HPV32\_Alpha\_9627327\_nt4401\_Genome\_Tile|1  
GTGTACATTGCTGTAAATAAAGTTGGGTTTTGTATTGTTTGTACCAAAGTGTATTATCA  
>HPV32\_Alpha\_9627327\_nt4421\_Genome\_Tile|1  
AGTTGGGTTTTGTATTGTTTGTACCAAAGTGTATTATCAATGCCACCACACCGAAGTCG  
>HPV32\_Alpha\_9627327\_nt4661\_Genome\_Tile|1  
GCGCACAGGGTATGTGCCTATAGGAACACGACCGCCTGTTGTTGCAGAGCCGGGCCCTGC  
>HPV32\_Alpha\_9627327\_nt4761\_Genome\_Tile|1  
GACCCATCTGTAATTTCCTTATTGGAAGAGTCTGCAGTTATTGATTCTAGCATACCAGTG  
>HPV32\_Alpha\_9627327\_nt4781\_Genome\_Tile|1  
ATTGGAAGAGTCTGCAGTTATTGATTCTAGCATACCAGTGCCTACCGACACGTCTCATGG  
>HPV32\_Alpha\_9627327\_nt4801\_Genome\_Tile|1  
TTGATTCTAGCATACCAGTGCCTACCGACACGTCTCATGGTGGGTTTAATATTACGTCCT  
>HPV32\_Alpha\_9627327\_nt4821\_Genome\_Tile|1  
CCTACCGACACGTCTCATGGTGGGTTTAATATTACGTCCTCTGCAAGTGGCCCGTCCTCT  
>HPV32\_Alpha\_9627327\_nt4841\_Genome\_Tile|1  
TGGGTTTAATATTACGTCCTCTGCAAGTGGCCCGTCCTCTACACCTGCTGTATTGGACAT  
>HPV32\_Alpha\_9627327\_nt4901\_Genome\_Tile|1  
TTCTCCTCCCACCAATACTATAAGGGTTGCATCTACTACGTCCCACAATCCAGTATACAG  
>HPV32\_Alpha\_9627327\_nt4961\_Genome\_Tile|1  
TGATCCTTTTACTTTACGGCCTTCTTTGCCAGTAGAGGGTAATGGTAGACTCTTAACATC  
>HPV32\_Alpha\_9627327\_nt4981\_Genome\_Tile|1  
CTTCTTTGCCAGTAGAGGGTAATGGTAGACTCTTAACATCCCACCCAACAATAGCCCCCTC  
>HPV32\_Alpha\_9627327\_nt5001\_Genome\_Tile|1  
AATGGTAGACTCTTAACATCCCACCCAACAATAGCCCCCTCATTCGTATGAGGAAATTCCT  
>HPV32\_Alpha\_9627327\_nt5041\_Genome\_Tile|1  
ATTCGTATGAGGAAATTCCTATGGACACTTTTGTGGTATCCACAGATACAAGTAATACTG  
>HPV32\_Alpha\_9627327\_nt5061\_Genome\_Tile|1  
ATGGACACTTTTGTGGTATCCACAGATACAAGTAATACTGTTACCAGTACCCCTATTCCCT  
>HPV32\_Alpha\_9627327\_nt5141\_Genome\_Tile|1  
CCTTGGTTTATATACCAGGGTCACTCAACAACGTCCAGTTGCTACTACAACATTTTTTAAC  
>HPV32\_Alpha\_9627327\_nt5201\_Genome\_Tile|1  
ATCTCCCAGCGTTTGGTAACCTATGACAACCTGCATATGAGGGTCCTGCTGAGGGTAC  
>HPV32\_Alpha\_9627327\_nt5221\_Genome\_Tile|1  
CCTATGACAACCTGCATATGAGGGTCCTGCTGAGGGTACGTTGGAATTTGAACATCCCA  
>HPV32\_Alpha\_9627327\_nt5241\_Genome\_Tile|1  
GAGGGTCCTGCTGAGGGTACGTTGGAATTTGAACATCCCACCATTCATGAGGCTCCTGAT  
>HPV32\_Alpha\_9627327\_nt5301\_Genome\_Tile|1  
TCTGATTTTATGGATATTATTGCATTACACCGTCCTGTGCTATCTGCTAGGCAGGGCACT  
>HPV32\_Alpha\_9627327\_nt5321\_Genome\_Tile|1  
TGCATTACACCGTCCTGTGCTATCTGCTAGGCAGGGCACTGTCCGTGTCAGTCGTATTGG  
>HPV32\_Alpha\_9627327\_nt5361\_Genome\_Tile|1  
GTCCGTGTCAGTCGTATTGGGCAACGGGCTTCCTTGCAAACACGTAGTGGGGCTCGTATT



>HPV32\_Alpha\_9627327\_nt5441\_Genome\_Tile|1  
CCATGATATTAGCCCAATCACTAGGCCATCAGAGGCTATAGAATTGCAACCTTTAGGCTC  
>HPV32\_Alpha\_9627327\_nt5461\_Genome\_Tile|1  
CTAGGCCATCAGAGGCTATAGAATTGCAACCTTTAGGCTCCTCCTCCACAGCTGTATCTA  
>HPV32\_Alpha\_9627327\_nt5481\_Genome\_Tile|1  
GAATTGCAACCTTTAGGCTCCTCCTCCACAGCTGTATCTACTACTGCTTCATCCGCAATT  
>HPV32\_Alpha\_9627327\_nt5501\_Genome\_Tile|1  
CTCCTCCACAGCTGTATCTACTACTGCTTCATCCGCAATTAATGATGGCCTGTTTGATGT  
>HPV32\_Alpha\_9627327\_nt5521\_Genome\_Tile|1  
CTACTGCTTCATCCGCAATTAATGATGGCCTGTTTGATGTTTATGTTGACCCTGACATAC  
>HPV32\_Alpha\_9627327\_nt5541\_Genome\_Tile|1  
AATGATGGCCTGTTTGATGTTTATGTTGACCCCTGACATACCTCCCTCACACGCGTTACCG  
>HPV32\_Alpha\_9627327\_nt5581\_Genome\_Tile|1  
CTCCCTCACACGCGTTACCGCCCTACGGTCCCCCACACACGTGTCAACTGTTTCTTTAA  
>HPV32\_Alpha\_9627327\_nt5621\_Genome\_Tile|1  
CGTGTCAACTGTTTCTTTAACTAGTCTTGGTAGTGTTCTTGACAAACTGCAAATACAAC  
>HPV32\_Alpha\_9627327\_nt5681\_Genome\_Tile|1  
TGTCCCTCTTCTTACCTACAAATATTAATGTAGGCCCTGACCTTTCACCTCCTGAGTC  
>HPV32\_Alpha\_9627327\_nt5701\_Genome\_Tile|1  
CAAATATTAATGTAGGCCCTGACCTTTCACCTCCTGAGTCTCCGCCCTTTATTAGTACAC  
>HPV32\_Alpha\_9627327\_nt5721\_Genome\_Tile|1  
GACCTTTCACCTCCTGAGTCTCCGCCCTTTATTAGTACACGTCCTGTATCACCTTCTTTT  
>HPV32\_Alpha\_9627327\_nt5741\_Genome\_Tile|1  
TCCGCCCTTTATTAGTACACGTCCTGTATCACCTTCTTTTGA CTCTGTTATGGTATTAGG  
>HPV32\_Alpha\_9627327\_nt6001\_Genome\_Tile|1  
GCTGTTGGGCATCCATATTATACTATTAAGAAGACACCCAATAGAACATCTATTCCAAAG  
>HPV32\_Alpha\_9627327\_nt6021\_Genome\_Tile|1  
TACTATTAAGAAGACACCCAATAGAACATCTATTCCAAAGGTGTCTGGATTGCAGTATAG  
>HPV32\_Alpha\_9627327\_nt6361\_Genome\_Tile|1  
ATTGGCGAGCATTGGGGTAAGGGTGCTGCTTGTCTGCACAATCAAATGGCGACTGCCCA  
>HPV32\_Alpha\_9627327\_nt6481\_Genome\_Tile|1  
GCAATGGACTTTAGTGCTTTGCAAACCTCAAAAGCTGAGGTGCCATTAGATATTATGAAC  
>HPV32\_Alpha\_9627327\_nt6681\_Genome\_Tile|1  
GGACATGTATATAAAAGCTTCTAATGGTGCTTCTGGCAGAAATAATTTAGCTAGTAGTAT  
>HPV32\_Alpha\_9627327\_nt6901\_Genome\_Tile|1  
GTGTGTGCTACTGTAACAACCTGAAGACACATACAAGTCTACTAACTTTAAGGAATATCTA  
>HPV32\_Alpha\_9627327\_nt7121\_Genome\_Tile|1  
ATAGATTTGTGCAGTCTCAGGCCATACGATGTCAAGCTAAGGTAACAGCACCTGAAAAAA  
>HPV32\_Alpha\_9627327\_nt7141\_Genome\_Tile|1  
GCCATACGATGTCAAGCTAAGGTAACAGCACCTGAAAAAAAGGATCCTTTTTCTGACTAT  
>HPV32\_Alpha\_9627327\_nt7281\_Genome\_Tile|1  
AGCTGGGTACGTGCAAGACCTAACTTACAGCAGTAAAACGAACAGCATCTTCCAGTCA  
>HPV32\_Alpha\_9627327\_nt7301\_Genome\_Tile|1  
CTAAACTTACAGCAGTAAAACGAACAGCATCTTCCAGTCAAAAGTCTTCTTCTCCTGCAA  
>HPV32\_Alpha\_9627327\_nt7441\_Genome\_Tile|1  
ATATGTGTGTTTCGGTGTGCATATTAATAAAGTATGATTGTGTTTCATTGTATGTTGTTGT  
>HPV32\_Alpha\_9627327\_nt7461\_Genome\_Tile|1  
ATATTAATAAAGTATGATTGTGTTTCATTGTATGTTGTTGTACCACCATTTTATTTTTTCAA  
>HPV32\_Alpha\_9627327\_nt7561\_Genome\_Tile|1  
GGATAATGTCCATTAAATTTAGCAAGCAGATGCAGTTTTTTACTGCCAAATATATGTACTG  
>HPV32\_Alpha\_9627327\_nt7621\_Genome\_Tile|1  
CCAAATGGTATTGCTAAGTAGCAAAATGTTTTTACATACATAACATACACGCCCTTTTGC  
>HPV32\_Alpha\_9627327\_nt7641\_Genome\_Tile|1  
GCAAAATGTTTTTACATACATAACATACACGCCCTTTTGCACAAGCATGTTTTAGAAAGG  
>HPV32\_Alpha\_9627327\_nt7661\_Genome\_Tile|1

TAACATACACGCCCTTTTGCACAAGCATGTTTTAGAAAGGTTGGCATAGCTTTGCATTTA  
>HPV32\_Alpha\_9627327\_nt7681\_Genome\_Tile|1  
ACAAGCATGTTTTAGAAAGGTTGGCATAGCTTTGCATTTACTTATTTCCCTTCTTCCTTTG  
>HPV32\_Alpha\_9627327\_nt7721\_Genome\_Tile|1  
CTTATTTCCCTTCTTCCTTTGTTTCATGTTATGACTACTGTATTTGTTATGTATAATTAAAA  
>HPV32\_Alpha\_9627327\_nt7801\_Genome\_Tile|1  
TGGGTTTTTGGCACAGTACTTTACAAGTTACTCTGGCCTAGACAAGACTAGTGCTTTGTCA  
>HPV32\_Alpha\_9627327\_nt7821\_Genome\_Tile|1  
TACAAGTTACTCTGGCCTAGACAAGACTAGTGCTTTGTCATGCCTTATATAACTAAGTAT  
>HPV32\_Alpha\_9627327\_nt7841\_Genome\_Tile|1  
ACAAGACTAGTGCTTTGTCATGCCTTATATAACTAAGTATTAGTCACTGACTGCATCTAA  
>HPV32\_Alpha\_9627327\_nt7861\_Genome\_Tile|1  
TGCCTTATATAACTAAGTATTAGTCACTGACTGCATCTAATTAACTGTCAACCGAAATC  
>HPV63\_Mu\_9626605\_nt0021\_Genome\_Tile|1  
TCTCTAGTTCTAACACGAACGTTTACGGTCGTTGCCAGCTTTTTCCCTTATAAACTCTGG  
>HPV63\_Mu\_9626605\_nt0041\_Genome\_Tile|1  
GTTTACGGTCTGTTGCCAGCTTTTTCCCTTATAAACTCTGGTGGGAATTTCTCTTGGGACA  
>HPV63\_Mu\_9626605\_nt0061\_Genome\_Tile|1  
TTTTCCCTTATAAACTCTGGTGGGAATTTCTCTTGGGACAGATGGACCTGACATCTGTAC  
>HPV63\_Mu\_9626605\_nt0121\_Genome\_Tile|1  
ATTCGGTTTCGGGATCTGAGTTCTGCTCTCCGTATCCCATTATTGATTTGGTTGTTCCCTT  
>HPV63\_Mu\_9626605\_nt0161\_Genome\_Tile|1  
TATTGATTTGGTTGTTCCCTTGCAATTTTTGCTTGAAATTTCTTACAAATGCTGAAAAATT  
>HPV63\_Mu\_9626605\_nt0181\_Genome\_Tile|1  
GCAATTTTTGCTTGAAATTTCTTACAAATGCTGAAAAATTGCTGTTTGATTATTTTGACT  
>HPV63\_Mu\_9626605\_nt0221\_Genome\_Tile|1  
GCTGTTTGATTATTTTGACTTGCTATCTGCGAGATAATTTTCGTGTTTGCTTGTTG  
>HPV63\_Mu\_9626605\_nt0241\_Genome\_Tile|1  
TGCATCTTATCTGGCGAGATAATTTTCGTGTTTGCTTGTTGTCAGTGCTGTGCTAGGCATG  
>HPV63\_Mu\_9626605\_nt0261\_Genome\_Tile|1  
AATTTTCGTGTTTGCTTGTTGTCAGTGCTGTGCTAGGCATGTTAGTCTGCTTGAGTTTATG  
>HPV63\_Mu\_9626605\_nt0321\_Genome\_Tile|1  
CTTTATTATCAGGAGTCTTTTCGAGGTATCTGAAGTAGAAGAATTACTTAATCAACCTCTT  
>HPV63\_Mu\_9626605\_nt0341\_Genome\_Tile|1  
CGAGGTATCTGAAGTAGAAGAATTACTTAATCAACCTCTTGTAATATTGGTTTAAGGTG  
>HPV63\_Mu\_9626605\_nt0361\_Genome\_Tile|1  
AATTACTTAATCAACCTCTTGTAATATTGGTTTAAGGTGTGTTACATGCACAAAAAAC  
>HPV63\_Mu\_9626605\_nt0421\_Genome\_Tile|1  
TGACTGTTTCAGAAAAGTTAGCTGTTGTTTCTGCTGGAGAAAGAGTTCATAAAGTAAGGA  
>HPV63\_Mu\_9626605\_nt0441\_Genome\_Tile|1  
GCTGTTGTTTCTGCTGGAGAAAGAGTTCATAAAGTAAGGAACAAATTCAAAGCAAAGTGC  
>HPV63\_Mu\_9626605\_nt0461\_Genome\_Tile|1  
AAGAGTTCATAAAGTAAGGAACAAATTCAAAGCAAAGTGCAGTTTGTGCAGACTCTACAT  
>HPV63\_Mu\_9626605\_nt0481\_Genome\_Tile|1  
ACAAATTCAAAGCAAAGTGCAGTTTGTGCAGACTCTACATTATATAGTTTGTGCAGACTC  
>HPV63\_Mu\_9626605\_nt0521\_Genome\_Tile|1  
TATATAGTTTGTGCAGACTCTATATAATTAACAATGGTGGGAGAGCAGCCAAATATAGGT  
>HPV63\_Mu\_9626605\_nt0541\_Genome\_Tile|1  
TATATAATTAACAATGGTGGGAGAGCAGCCAAATATAGGTGATTTGGTGAGTCAAGAAGA  
>HPV63\_Mu\_9626605\_nt0561\_Genome\_Tile|1  
GAGAGCAGCCAAATATAGGTGATTTGGTGAGTCAAGAAGAACCAAGCGTCCTAGATCTAA  
>HPV63\_Mu\_9626605\_nt0581\_Genome\_Tile|1  
GATTTGGTGAGTCAAGAAGAACCAAGCGTCCTAGATCTAAATTGTTATGAGGATATACCT  
>HPV63\_Mu\_9626605\_nt0621\_Genome\_Tile|1  
ATTGTTATGAGGATATACCTGCTGAGGAGGAGGAGTCTGAATATCCATATGCAATTGTGC

>HPV63\_Mu\_9626605\_nt0641\_Genome\_Tile|1  
GCTGAGGAGGAGGAGTCTGAATATCCATATGCAATTGTGCTTCCTTGTGGTTTGTGCGAT  
>HPV63\_Mu\_9626605\_nt0661\_Genome\_Tile|1  
ATATCCATATGCAATTGTGCTTCCTTGTGGTTTGTGCGATCAGCTGTTAAGGCTGACCTG  
>HPV63\_Mu\_9626605\_nt0681\_Genome\_Tile|1  
TTCCTTGTGGTTTGTGCGATCAGCTGTTAAGGCTGACCTGCGTTTCTGACCTGTCTACTC  
>HPV63\_Mu\_9626605\_nt0801\_Genome\_Tile|1  
TTCGACACCAACGACACTAAGATGACCGACAGAGGTACAAATAATGATGATTGGTATATT  
>HPV63\_Mu\_9626605\_nt0841\_Genome\_Tile|1  
ATAATGATGATTGGTATATTGTGGATGAGGCAGAATGTCTGGGATGATGATGAGAGCGAAT  
>HPV63\_Mu\_9626605\_nt0881\_Genome\_Tile|1  
GGATGATGATGAGAGCGAATTGGAGGATTTGGAGGACACCTATAATTCATTGTTTAATAG  
>HPV63\_Mu\_9626605\_nt0921\_Genome\_Tile|1  
TATAATTCATTGTTTAATAGATCTGAAAGTGACATATCAGATCTATTAGACGATACGCAG  
>HPV63\_Mu\_9626605\_nt0941\_Genome\_Tile|1  
ATCTGAAAGTGACATATCAGATCTATTAGACGATACGCAGCAAAGTCAGGGAAATCCCT  
>HPV63\_Mu\_9626605\_nt1041\_Genome\_Tile|1  
GACCTAAATACCTAAAACGAAAGTACTTAAACAGTCCCTCCGACGGCAAGTGCCACAGAG  
>HPV63\_Mu\_9626605\_nt1061\_Genome\_Tile|1  
AAAGTACTTAAACAGTCCCTCCGACGGCAAGTGCCACAGAGACTGCCTGCAATAGCCTCAG  
>HPV63\_Mu\_9626605\_nt1081\_Genome\_Tile|1  
CGCAGGCAAGTGCCACAGAGACTGCCTGCAATAGCCTCAGTCCCAGATTGGAATCTATAA  
>HPV63\_Mu\_9626605\_nt1121\_Genome\_Tile|1  
TCCCAGATTGGAATCTATAACAATTTTCGACAGAGGAAAAAAGGCAAGAAAGCAACTATT  
>HPV63\_Mu\_9626605\_nt1161\_Genome\_Tile|1  
AAGGCAAGAAAGCAACTATTTACACAAAATGACAGTGGCATAGAGTTATCGCTATGCCAG  
>HPV63\_Mu\_9626605\_nt1181\_Genome\_Tile|1  
TACACAAAATGACAGTGGCATAGAGTTATCGCTATGCCAGGATGAAGTTGACAATATTAA  
>HPV63\_Mu\_9626605\_nt1261\_Genome\_Tile|1  
TAGACATCGTACAGTCTCTGGGAGGTGGGGTGCGTGACTGTATAGGAGTGGACATTTTGA  
>HPV63\_Mu\_9626605\_nt1281\_Genome\_Tile|1  
GGAGGTGGGGTGCGTGACTGTATAGGAGTGGACATTTTGAAATGCAGTAATACAAGATCT  
>HPV63\_Mu\_9626605\_nt1301\_Genome\_Tile|1  
TATAGGAGTGGACATTTTGAAATGCAGTAATACAAGATCTGCTCTACTTGCCAAATTTAA  
>HPV63\_Mu\_9626605\_nt1321\_Genome\_Tile|1  
AATGCAGTAATACAAGATCTGCTCTACTTGCCAAATTTAAAGACACAGTAGGTGTCAGTT  
>HPV63\_Mu\_9626605\_nt1341\_Genome\_Tile|1  
GCTCTACTTGCCAAATTTAAAGACACAGTAGGTGTCAGTTTTACTGACCTCACCAGAGCA  
>HPV63\_Mu\_9626605\_nt1381\_Genome\_Tile|1  
TTACTGACCTCACCAGAGCATACAAAAACAACAGACATGCTGTAGTTACTGGGTCATAG  
>HPV63\_Mu\_9626605\_nt1401\_Genome\_Tile|1  
TACAAAAACAACAAGACATGCTGTAGTTACTGGGTCATAGCAGTGTGGGGAGTAACATCT  
>HPV63\_Mu\_9626605\_nt1421\_Genome\_Tile|1  
CTGTAGTTACTGGGTCATAGCAGTGTGGGGAGTAACATCTACGTCTGTGGACGTTGTGAA  
>HPV63\_Mu\_9626605\_nt1441\_Genome\_Tile|1  
CAGTGTGGGGAGTAACATCTACGTCTGTGGACGTTGTGAAAAGTGTATTCCAAGTTCAGT  
>HPV63\_Mu\_9626605\_nt1461\_Genome\_Tile|1  
ACGTCTGTGGACGTTGTGAAAAGTGTATTCCAAGTTCAGTGTAAATTATATGCATGTAGAA  
>HPV63\_Mu\_9626605\_nt1481\_Genome\_Tile|1  
AACTGTATTCCAAGTTCAGTGTAAATTATATGCATGTAGAACATTGTTTAACTGAAAAAAA  
>HPV63\_Mu\_9626605\_nt1501\_Genome\_Tile|1  
GTAATTATATGCATGTAGAACATTGTTTAACTGAAAAAAAATAAGTTTCTAATTGTATTAG  
>HPV63\_Mu\_9626605\_nt1581\_Genome\_Tile|1  
AGTAGAGAAACAGTGTTAAATCTCGTAACTAGCAGTTTGAATGTGCAAGTAATTACATA  
>HPV63\_Mu\_9626605\_nt1661\_Genome\_Tile|1

TAGAAGTATGGCGGCAGCGTTATATTGGTATAGGAGATCTATGTCTCCAGCTGTATATAC  
>HPV63\_Mu\_9626605\_nt1681\_Genome\_Tile|1  
TATATTGGTATAGGAGATCTATGTCTCCAGCTGTATATACCTGGGGAGAAATGCCAGATT  
>HPV63\_Mu\_9626605\_nt1741\_Genome\_Tile|1  
GGATGGCGCAGCAGACATTGTTGAATCATCAATTAGCATCAGAAAAGCATTTTGAATTGT  
>HPV63\_Mu\_9626605\_nt1941\_Genome\_Tile|1  
TGTGCTAGAATGGTTAGTCATTACAAAAGGGCAGAAATGAGTAGTATGTCTATGTCAGCA  
>HPV63\_Mu\_9626605\_nt1961\_Genome\_Tile|1  
TTACAAAAGGGCAGAAATGAGTAGTATGTCTATGTCAGCATGGATTTATAAAAGACTGGA  
>HPV63\_Mu\_9626605\_nt1981\_Genome\_Tile|1  
GTAGTATGTCTATGTCAGCATGGATTTATAAAAGACTGGAGGAAGTTGAAAATGGTGGTG  
>HPV63\_Mu\_9626605\_nt2001\_Genome\_Tile|1  
TGGATTTATAAAAGACTGGAGGAAGTTGAAAATGGTGGTGGTGGTGGTGGTGGTGGTGGT  
>HPV63\_Mu\_9626605\_nt2021\_Genome\_Tile|1  
GGAAGTTGAAAATGGTGGTGGTGGTGGTGGTGGTGGTGGTGGTGGTGGTGGTGGTGGTGGT  
>HPV63\_Mu\_9626605\_nt2041\_Genome\_Tile|1  
ACTGGAACATATTGTAAAGTTCTTGAGGTTTCAAGAAGTAGAATTTATAAGTTTCATGA  
>HPV63\_Mu\_9626605\_nt2061\_Genome\_Tile|1  
TTCTTGAGGTTTCAAGAAGTAGAATTTATAAGTTTCATGATAGCATTTAAGGAATTGTTA  
>HPV63\_Mu\_9626605\_nt2101\_Genome\_Tile|1  
TAGCATTTAAGGAATTGTTAAGTGGTAAACCAAAGAAAAATTGTCTTGTAATATATGGTC  
>HPV63\_Mu\_9626605\_nt2161\_Genome\_Tile|1  
CACCAAATACTGGTAAATCTATGTTTTGTATGAGTTTGTGAGAGTATTAAAAGGAAAAG  
>HPV63\_Mu\_9626605\_nt2181\_Genome\_Tile|1  
ATGTTTTGTATGAGTTTGTGAGAGTATTAAAAGGAAAAGTAATATCTTATGTAAATAGC  
>HPV63\_Mu\_9626605\_nt2261\_Genome\_Tile|1  
ACCACTAGCTAGCACTAAATAGCATTATTAGATGATGCAACAAAACAGCATGGGATTA  
>HPV63\_Mu\_9626605\_nt2301\_Genome\_Tile|1  
ACAAAACAGCATGGGATTATATTGATTATTTTTGAGAAATGCTTTAGATGGGAATCCT  
>HPV63\_Mu\_9626605\_nt2401\_Genome\_Tile|1  
AATGTCTCCACTTATGATAACTTCTAATATAAATGTTAAGGCTGATGTATGTTGGATGT  
>HPV63\_Mu\_9626605\_nt2421\_Genome\_Tile|1  
ACTTCTAATATAAATGTTAAGGCTGATGTATGTTGGATGTATTTACATAGTAGGATAACA  
>HPV63\_Mu\_9626605\_nt2481\_Genome\_Tile|1  
TGTTTTGAATTTAAACAACCTTTTCCATTTGATGAAAATGGTCAACCGGCATTTTCCTTA  
>HPV63\_Mu\_9626605\_nt2641\_Genome\_Tile|1  
TTAGACTGGCTACAAGAGCAGCTTCTAACTCTATATGAGAAAGACAGTAAAGATATTGAA  
>HPV63\_Mu\_9626605\_nt2661\_Genome\_Tile|1  
GCTTCTAACTCTATATGAGAAAGACAGTAAAGATATTGAAGATCAGATAATGCAGTGGAA  
>HPV63\_Mu\_9626605\_nt2701\_Genome\_Tile|1  
GATCAGATAATGCAGTGAATCTACTTAGACAGGAACAAGTGTTATTCCACTATGCCCCGA  
>HPV63\_Mu\_9626605\_nt2721\_Genome\_Tile|1  
TCTACTTAGACAGGAACAAGTGTATTCCACTATGCCCCGAAAAAAGGGAATAATGCGACT  
>HPV63\_Mu\_9626605\_nt2761\_Genome\_Tile|1  
AAAAAGGGAATAATGCGACTTGGCCTGCAAGTTGTGCCTTCCCTTGCAGCTTCCCAGGAT  
>HPV63\_Mu\_9626605\_nt2801\_Genome\_Tile|1  
CCCTTGCAGCTTCCCAGGATAAAGCAAAACAGCTATAGAAATGACTCTTATCTTAGTG  
>HPV63\_Mu\_9626605\_nt2821\_Genome\_Tile|1  
AAAGCAAAAACAGCTATAGAAATGACTCTTATCTTAGTGGCCTCAGAGACTCACAATAT  
>HPV63\_Mu\_9626605\_nt2901\_Genome\_Tile|1  
ACAAGATACTAGCAGAGAAATCTTTTTAGCACCACAGATCATAACATTCAAAAAGGGAGG  
>HPV63\_Mu\_9626605\_nt2921\_Genome\_Tile|1  
TCTTTTTAGCACCACAGATCATAACATTCAAAAAGGGAGGGCAACAATTGAGGTAATCT  
>HPV63\_Mu\_9626605\_nt2961\_Genome\_Tile|1  
GCAACAATTGAGGTAATCTATGATGAGGATCCCAATAATAGCACCAGACATACTGTATG

>HPV63\_Mu\_9626605\_nt2981\_Genome\_Tile|1  
ATGATGAGGATCCCAATAATAGCACACACTGTATGGCGCCATATATATTATCAAA  
>HPV63\_Mu\_9626605\_nt3061\_Genome\_Tile|1  
AAAGCAGCTAGTGATGTAGATGTTTCATGGTGTGTTTTATTTAGAATATGATGGTGTCAAA  
>HPV63\_Mu\_9626605\_nt3081\_Genome\_Tile|1  
TGTTTCATGGTGTGTTTTATTTAGAATATGATGGTGTCAAAACTACTATGTTGACTTTCA  
>HPV63\_Mu\_9626605\_nt3101\_Genome\_Tile|1  
TAGAATATGATGGTGTCAAAACTACTATGTTGACTTTCAAGAAGAGGCCAATCGATATA  
>HPV63\_Mu\_9626605\_nt3121\_Genome\_Tile|1  
AACTACTATGTTGACTTTCAAGAAGAGGCCAATCGATATAGCAAAACAGGTCGATATACT  
>HPV63\_Mu\_9626605\_nt3141\_Genome\_Tile|1  
AGAAGAGGCCAATCGATATAGCAAAACAGGTCGATATACTGTTCAATATGAGGGTAAAAG  
>HPV63\_Mu\_9626605\_nt3181\_Genome\_Tile|1  
GTTCAATATGAGGGTAAAAGGTTTACAAATGTTATGTCTCCTGTCAATAGCTCCCCACTA  
>HPV63\_Mu\_9626605\_nt3221\_Genome\_Tile|1  
CTGTCAATAGCTCCCCACTACGGACTTCTGGGTCTCCTACAGACACCAACCCAGCCACCC  
>HPV63\_Mu\_9626605\_nt3241\_Genome\_Tile|1  
CGGACTTCTGGGTCTCCTACAGACACCAACCCAGCCACCCAAAGGACAATCCACCCAACT  
>HPV63\_Mu\_9626605\_nt3261\_Genome\_Tile|1  
AGACACCAACCCAGCCACCCAAAGGACAATCCACCCAACTGCCAGAAAAGCAGAGACGAA  
>HPV63\_Mu\_9626605\_nt3301\_Genome\_Tile|1  
GCCAGAAAAGCAGAGACGAAGGGGTCTGAGACACCACCCGAAATCGCCGGCTGTTGCAAG  
>HPV63\_Mu\_9626605\_nt3401\_Genome\_Tile|1  
ATACCACCTCAGACGAGGAGAAGGAGAATCGGCCAGAGCCTCTGCCGGTAGTGGAGAAC  
>HPV63\_Mu\_9626605\_nt3421\_Genome\_Tile|1  
GAAGGAGAATCGGCCAGAGCCTCTGCCGGTAGTGGAGAACGGGTGGCATTTCATTTCTCCG  
>HPV63\_Mu\_9626605\_nt3441\_Genome\_Tile|1  
CTCTGCCGGTAGTGGAGAACGGGTGGCATTTCATTTCTCCGGGAGACGTTGGAACATCAAC  
>HPV63\_Mu\_9626605\_nt3521\_Genome\_Tile|1  
GTCAATCAAGACTTCGAAGACTTATACAGGAGGCTCGGGATCCACCCATAATTTGTCTGA  
>HPV63\_Mu\_9626605\_nt3561\_Genome\_Tile|1  
TCCACCCATAATTTGTCTGAAGGGGGCCCTAATCAACTTAAGTGCTTAAGGTATAGGAT  
>HPV63\_Mu\_9626605\_nt3601\_Genome\_Tile|1  
AAGTGCTTAAGGTATAGGATTAAAGCTTCAAATTCATCTGACTTTGAAAGTATCAGTACT  
>HPV63\_Mu\_9626605\_nt3621\_Genome\_Tile|1  
TAAAGCTTCAAATTCATCTGACTTTGAAAGTATCAGTACTACATGGCATTGGGTACATAA  
>HPV63\_Mu\_9626605\_nt3641\_Genome\_Tile|1  
ACTTTGAAAGTATCAGTACTACATGGCATTGGGTACATAATAAATGCACAGATAGAGTAG  
>HPV63\_Mu\_9626605\_nt3661\_Genome\_Tile|1  
ACATGGCATTGGGTACATAATAAATGCACAGATAGAGTAGGTCATGCACGTATGCTGGTG  
>HPV63\_Mu\_9626605\_nt3681\_Genome\_Tile|1  
TAAATGCACAGATAGAGTAGGTCATGCACGTATGCTGGTGCCTTTATATCAACAGAACA  
>HPV63\_Mu\_9626605\_nt3701\_Genome\_Tile|1  
GTCATGCACGTATGCTGGTGCCTTTATATCAACAGAACAACGTGACCGATTTTTAGATA  
>HPV63\_Mu\_9626605\_nt3721\_Genome\_Tile|1  
CGTTTTATATCAACAGAACAACGTGACCGATTTTTAGATAAGGTGGTGGTGCCTAAATCT  
>HPV63\_Mu\_9626605\_nt3781\_Genome\_Tile|1  
GTTTCTGTTATTTTAGGGGCATTTGACGGTTCCTAAGGGTGGGTGTTGGGGTATATTTTG  
>HPV63\_Mu\_9626605\_nt3801\_Genome\_Tile|1  
ATTTGACGGTTCCTAAGGGTGGGTGTTGGGGTATATTTTGTAAATCATGTTAAGAGTACGT  
>HPV63\_Mu\_9626605\_nt3821\_Genome\_Tile|1  
GGGTGTTGGGGTATATTTTGTAAATCATGTTAAGAGTACGTAAACGACGAGCTGCTCCACA  
>HPV63\_Mu\_9626605\_nt3841\_Genome\_Tile|1  
TAATCATGTTAAGAGTACGTAAACGACGAGCTGCTCCACAAGATATTTATCCTGCTTGTA  
>HPV63\_Mu\_9626605\_nt3861\_Genome\_Tile|1

AAACGACGAGCTGCTCCACAAGATATTTATCCTGCTTGTAAGGTTGCAAACAATTGCCCC  
>HPV63\_Mu\_9626605\_nt4041\_Genome\_Tile|1  
TATGGTTATACACCTCTAGGGGACAGTGGTGCGGTGCGAGTTGGTGGCAGAAGTACACCT  
>HPV63\_Mu\_9626605\_nt4101\_Genome\_Tile|1  
GTAAGACCAACAGTACCTGTGGAGACTGTAGGACCAAGGGATATATTACCTATAGATTCA  
>HPV63\_Mu\_9626605\_nt4121\_Genome\_Tile|1  
GGAGACTGTAGGACCAAGGGATATATTACCTATAGATTCATTGGATCCTTTAGGGCCCTC  
>HPV63\_Mu\_9626605\_nt4141\_Genome\_Tile|1  
ATATATTACCTATAGATTCATTGGATCCTTTAGGGCCCTCAGTCATTGAACTAGAAGATA  
>HPV63\_Mu\_9626605\_nt4181\_Genome\_Tile|1  
AGTCATTGAACTAGAAGATATTCCAGCCACAACAGTGGAAAGTAGTGGCTGAAGTGCATCC  
>HPV63\_Mu\_9626605\_nt4221\_Genome\_Tile|1  
GTAGTGGCTGAAGTGCATCCCATATCTGATACTCCACAAATACCGGCACCTACTACTGAT  
>HPV63\_Mu\_9626605\_nt4241\_Genome\_Tile|1  
CATATCTGATACTCCACAAATACCGGCACCTACTACTGATGAATCTAGTTCAGCTGTTCT  
>HPV63\_Mu\_9626605\_nt4261\_Genome\_Tile|1  
TACCGGCACCTACTACTGATGAATCTAGTTCAGCTGTTCTTCATATTCCACAAGAAAGTC  
>HPV63\_Mu\_9626605\_nt4281\_Genome\_Tile|1  
GAATCTAGTTCAGCTGTTCTTCATATTCCACAAGAAAGTCCTGCTGCACGTACAATCACA  
>HPV63\_Mu\_9626605\_nt4301\_Genome\_Tile|1  
TCATATTCCACAAGAAAGTCCTGCTGCACGTACAATCACACGTTCCCAATACAATAATCC  
>HPV63\_Mu\_9626605\_nt4341\_Genome\_Tile|1  
CGTTCCCAATACAATAATCCTTTATTTCAGGATCACAGCTAGTGCAGACATAGCATCAGGT  
>HPV63\_Mu\_9626605\_nt4361\_Genome\_Tile|1  
TTTATTTCAGGATCACAGCTAGTGCAGACATAGCATCAGGTGAAGCTTCAGCATCTGATAA  
>HPV63\_Mu\_9626605\_nt4381\_Genome\_Tile|1  
GTGCAGACATAGCATCAGGTGAAGCTTCAGCATCTGATAATATTTTATAGATGTAGATA  
>HPV63\_Mu\_9626605\_nt4401\_Genome\_Tile|1  
GAAGCTTCAGCATCTGATAATATTTTATAGATGTAGATACGCCGGGTCAAATAGTAGGA  
>HPV63\_Mu\_9626605\_nt4421\_Genome\_Tile|1  
TATTTTATAGATGTAGATACGCCGGGTCAAATAGTAGGACAAGAAATACCACTAGTTAA  
>HPV63\_Mu\_9626605\_nt4461\_Genome\_Tile|1  
CAAGAAATACCACTAGTTAATTTTGATATGGGACCTATATCTACTGAAGGTGAGCTTGAA  
>HPV63\_Mu\_9626605\_nt4501\_Genome\_Tile|1  
CTACTGAAGGTGAGCTTGAAACTGAGTTCACAACCTAGTACACCAAGAACCACACAAGTAC  
>HPV63\_Mu\_9626605\_nt4521\_Genome\_Tile|1  
ACTGAGTTCACAACTAGTACACCAAGAACCACACAAGTACAGGAAAGGCCTACACGTTTC  
>HPV63\_Mu\_9626605\_nt4541\_Genome\_Tile|1  
ACCAAGAACCACACAAGTACAGGAAAGGCCTACACGTTTCTATAATAGACGCTATTATGA  
>HPV63\_Mu\_9626605\_nt4561\_Genome\_Tile|1  
AGGAAAGGCCTACACGTTTCTATAATAGACGCTATTATGAACAAGTGCCAGTTACTGCAC  
>HPV63\_Mu\_9626605\_nt4601\_Genome\_Tile|1  
ACAAGTGCCAGTTACTGCACCTGAATTTATCACAAGGCCTGCTTCCTTAGTTACTTTTGA  
>HPV63\_Mu\_9626605\_nt4621\_Genome\_Tile|1  
CTGAATTTATCACAAGGCCTGCTTCCTTAGTTACTTTTGAGAATCCTGCATTTGAAAGGA  
>HPV63\_Mu\_9626605\_nt4641\_Genome\_Tile|1  
GCTTCCTTAGTTACTTTTGAGAATCCTGCATTTGAAAGGAGTGTTCCTTGATTTTGA  
>HPV63\_Mu\_9626605\_nt4661\_Genome\_Tile|1  
GAATCCTGCATTTGAAAGGAGTGTTCCTTTGATTTTGAACAAGATTTAGAAGATATTTT  
>HPV63\_Mu\_9626605\_nt4721\_Genome\_Tile|1  
AAATGCTCCTGATCAGGATTTTAGAGACATTGTTTATTTAAGCAGACCAACATACAGTCG  
>HPV63\_Mu\_9626605\_nt4741\_Genome\_Tile|1  
TTAGAGACATTGTTTATTTAAGCAGACCAACATACAGTCGTGCCCTGATGGCCGCATGC  
>HPV63\_Mu\_9626605\_nt4801\_Genome\_Tile|1  
GCCTAAGCCGCTGGGACGCAGAGCCACTATAAGTACCAGAAGTGGTGTACTATAGGTG

>HPV63\_Mu\_9626605\_nt4861\_Genome\_Tile|1  
CTCAATCACACTTTTATATGGATATTAGCTCTATCTCCTCAAATGATGGCATTGAGTTAC  
>HPV63\_Mu\_9626605\_nt4881\_Genome\_Tile|1  
GATATTAGCTCTATCTCCTCAAATGATGGCATTGAGTTACAAACACTGGGTGAAGCTTCT  
>HPV63\_Mu\_9626605\_nt4901\_Genome\_Tile|1  
AAATGATGGCATTGAGTTACAAACACTGGGTGAAGCTTCTGGCGAGACTGTGGTGCAAAG  
>HPV63\_Mu\_9626605\_nt4921\_Genome\_Tile|1  
AAACACTGGGTGAAGCTTCTGGCGAGACTGTGGTGCAAAGTTCTCTTGCTGCATCGGATC  
>HPV63\_Mu\_9626605\_nt4941\_Genome\_Tile|1  
GGCGAGACTGTGGTGCAAAGTTCTCTTGCTGCATCGGATCCTATTGAAGCAGAACATTCA  
>HPV63\_Mu\_9626605\_nt4981\_Genome\_Tile|1  
CTATTGAAGCAGAACATTCATTCATTGAACCAGCACCATCTATAGATAGTTATGATATTG  
>HPV63\_Mu\_9626605\_nt5001\_Genome\_Tile|1  
TTCATTGAACCAGCACCATCTATAGATAGTTATGATATTGTTTCACTTCAGTCTGAGACT  
>HPV63\_Mu\_9626605\_nt5021\_Genome\_Tile|1  
TATAGATAGTTATGATATTGTTTCACTTCAGTCTGAGACTTATTCAGATGAACATTTGTT  
>HPV63\_Mu\_9626605\_nt5041\_Genome\_Tile|1  
TTTCACTTCAGTCTGAGACTTATTCAGATGAACATTTGTTAGATATGTATGAACCTGTAG  
>HPV63\_Mu\_9626605\_nt5061\_Genome\_Tile|1  
TATTCAGATGAACATTTGTTAGATATGTATGAACCTGTAGGTTCTTCCTTGCAATTACAA  
>HPV63\_Mu\_9626605\_nt5081\_Genome\_Tile|1  
AGATATGTATGAACCTGTAGGTTCTTCCTTGCAATTACAAATATCAGACGTCAGAGGTCG  
>HPV63\_Mu\_9626605\_nt5101\_Genome\_Tile|1  
GTTCTTCCTTGCAATTACAAATATCAGACGTCAGAGGTCGGCCAACTGTTATTGATATTC  
>HPV63\_Mu\_9626605\_nt5141\_Genome\_Tile|1  
GCCAACTGTTATTGATATTCCCTTTAGACCCCGCAGGCCTCCATTAGGTCCCTATAAATGC  
>HPV63\_Mu\_9626605\_nt5161\_Genome\_Tile|1  
CCTTTAGACCCCGCAGGCCTCCATTAGGTCCCTATAAATGCTGGTGTTGATATCTATAGTC  
>HPV63\_Mu\_9626605\_nt5221\_Genome\_Tile|1  
CAACTGCTAGTGTTGGATCACCTACTATAAATCCTACTGATCTTGACATTCCATTAATTA  
>HPV63\_Mu\_9626605\_nt5281\_Genome\_Tile|1  
TTATACATTTAGATAAATCAACAGGGGATTATGATTTACATCCAAGTTTGCGTAAACGTC  
>HPV63\_Mu\_9626605\_nt5301\_Genome\_Tile|1  
ACAGGGGATTATGATTTACATCCAAGTTTGCGTAAACGTCGCAAATTAGTTCATATTTGA  
>HPV63\_Mu\_9626605\_nt5321\_Genome\_Tile|1  
TCCAAGTTTGCGTAAACGTCGCAAATTAGTTCATATTTGATATTTTACAGATGGCTGTTT  
>HPV63\_Mu\_9626605\_nt5341\_Genome\_Tile|1  
GCAAATTAGTTCATATTTGATATTTTACAGATGGCTGTTTGGCTTCCTGCCCAGAATAAG  
>HPV63\_Mu\_9626605\_nt6841\_Genome\_Tile|1  
AGAAAACGTAGATCCTCCAATACTACTGTGGCCAAACGGAGGCGACGGGCCTGAATATAC  
>HPV63\_Mu\_9626605\_nt6861\_Genome\_Tile|1  
TACTACTGTGGCCAAACGGAGGCGACGGGCCTGAATATACATGTGAATGTTGAATTATAT  
>HPV63\_Mu\_9626605\_nt6901\_Genome\_Tile|1  
ATGTGAATGTTGAATTATATAATGTGAATTGTGAATCCTTGACTTTGGCACTTGCACTTT  
>HPV63\_Mu\_9626605\_nt6921\_Genome\_Tile|1  
AATGTGAATGTTGAATCCTTGACTTTGGCACTTGCACTTTATTCTTGGCATACTGATACT  
>HPV63\_Mu\_9626605\_nt6941\_Genome\_Tile|1  
GACTTTGGCACTTGCACTTTATTCTTGGCATACTGATACTTGAAACTTGTTCAATGCTTG  
>HPV63\_Mu\_9626605\_nt6981\_Genome\_Tile|1  
TGAAACTTGTTCAATGCTTGAAGGTTACACACCTGTACAGTATTGTTAATAAACGTTTAT  
>HPV63\_Mu\_9626605\_nt7001\_Genome\_Tile|1  
AAGGTTACACACCTGTACAGTATTGTTAATAAACGTTTATGCTGCTGTCATTTACCTGTC  
>HPV63\_Mu\_9626605\_nt7021\_Genome\_Tile|1  
TATTGTTAATAAACGTTTATGCTGCTGTCATTTACCTGTCTTCGAGTCATTATTGCCTAG  
>HPV63\_Mu\_9626605\_nt7041\_Genome\_Tile|1

GCTGCTGTCATTTACCTGTCTTCGAGTCATTATTGCCTAGTCATATAGCCTCATGACTTG  
>HPV63\_Mu\_9626605\_nt7061\_Genome\_Tile|1  
TTCGAGTCATTATTGCCTAGTCATATAGCCTCATGACTTGGCATGCAATTGGTATGTGGC  
>HPV63\_Mu\_9626605\_nt7081\_Genome\_Tile|1  
TCATATAGCCTCATGACTTGGCATGCAATTGGTATGTGGCAGATACTTCAAACAGGATAC  
>HPV63\_Mu\_9626605\_nt7121\_Genome\_Tile|1  
AGATACTTCAAACAGGATACTGGTATCCTTTTTGGCGCGCGCGCAATTTTGAAGTTACC  
>HPV63\_Mu\_9626605\_nt7161\_Genome\_Tile|1  
GCGCGAATTTTGAAGTTACCACTGTTCCAACCTGTTCTGAGACGTCTGGATCTGATCCCG  
>HPV63\_Mu\_9626605\_nt7181\_Genome\_Tile|1  
ACTGTTCCAACCTGTTCTGAGACGTCTGGATCTGATCCCGACCGCTGTCGTTACTGCCAA  
>HPV63\_Mu\_9626605\_nt7221\_Genome\_Tile|1  
ACCGCTGTCGTTACTGCCAAAGACGAAAGTGGTAGGCGCGAACCGTTTGTGGTTTCCCTG  
>HPV63\_Mu\_9626605\_nt7241\_Genome\_Tile|1  
AGACGAAAGTGGTAGGCGCGAACCGTTTGTGGTTTCCCTGGGGCTAGCAGAACTCTTTA  
>HPV41\_Nu\_9626041\_nt0001\_Genome\_Tile|1  
ACAATCATAATCATCGCCCTTTCGTGTTATTTCTTGTAACGAATTCGTTACAAAACACAC  
>HPV41\_Nu\_9626041\_nt0021\_Genome\_Tile|1  
TTCGTGTTATTTCTTGTAACGAATTCGTTACAAAACACACACAGTATATAAGATAGAG  
>HPV41\_Nu\_9626041\_nt0061\_Genome\_Tile|1  
ACACAGTATATAAGATAGAGGAACGGATTGGTACACCACAGATGGCATCAACAAGCGGTG  
>HPV41\_Nu\_9626041\_nt0201\_Genome\_Tile|1  
ACTTATCCATGCATACAGCTCTGCTGCCATTATTGCTATAAGATCCTTAGCGTATTGGAT  
>HPV41\_Nu\_9626041\_nt0241\_Genome\_Tile|1  
AGATCCTTAGCGTATTGGATATTTACGCTTTCGACCAGAGCTGTCTGTACTTATCCTGGG  
>HPV41\_Nu\_9626041\_nt0281\_Genome\_Tile|1  
CTGTCTGTACTTATCCTGGGGAGAAGGGGGGCCAACGGGTATTTGTTCTCAGTGTACTAG  
>HPV41\_Nu\_9626041\_nt0301\_Genome\_Tile|1  
GAGAAGGGGGGCCAACGGGTATTTGTTCTCAGTGTACTAGAGTGCTTGCAAGGCTGGAGT  
>HPV41\_Nu\_9626041\_nt0321\_Genome\_Tile|1  
ATTTGTTCTCAGTGTACTAGAGTGCTTGCAAGGCTGGAGTTCACTGCACGGCACGAAGTG  
>HPV41\_Nu\_9626041\_nt0361\_Genome\_Tile|1  
TCACTGCACGGCACGAAGTGTCTTGTGCAGCCAGCCGTCTGCCGCACTTTATAGGACAGA  
>HPV41\_Nu\_9626041\_nt0381\_Genome\_Tile|1  
TCTTGTGCAGCCAGCCGTCTGCCGCACTTTATAGGACAGAGCCTCAGCGACCTTGAGGTG  
>HPV41\_Nu\_9626041\_nt0401\_Genome\_Tile|1  
GCCGCACTTTATAGGACAGAGCCTCAGCGACCTTGAGGTGAGGTGTGTGAGGTGCCTAGC  
>HPV41\_Nu\_9626041\_nt0461\_Genome\_Tile|1  
TCTTCTACAATCTGTGGAAAAGGATTACATATTGCGGGAAGACTTGTCTGTGCATAGAAT  
>HPV41\_Nu\_9626041\_nt0481\_Genome\_Tile|1  
AGGATTACATATTGCGGGAAGACTTGTCTGTGCATAGAATTGGCGGGATCTGGAGGGGAA  
>HPV41\_Nu\_9626041\_nt0501\_Genome\_Tile|1  
GACTTGTCTGTGCATAGAATTGGCGGGATCTGGAGGGGAACCTTGTGTTTCGATGTATGGTA  
>HPV41\_Nu\_9626041\_nt0541\_Genome\_Tile|1  
CTTGTGTTTCGATGTATGGTAGGACTGTATTAGCTGTGAGACTAATATACTGTTTGCTGTA  
>HPV41\_Nu\_9626041\_nt0561\_Genome\_Tile|1  
GGACTGTATTAGCTGTGAGACTAATATACTGTTTGCTGTATTGTATTGCTGTAATCGTGC  
>HPV41\_Nu\_9626041\_nt0581\_Genome\_Tile|1  
CTAATATACTGTTTGCTGTATTGTATTGCTGTAATCGTGCGTAAATTGCTATACCCTGTA  
>HPV41\_Nu\_9626041\_nt0601\_Genome\_Tile|1  
TTGTATTGCTGTAATCGTGCGTAAATTGCTATACCCTGTAATAATGAGAGGGGAATAGTGT  
>HPV41\_Nu\_9626041\_nt0621\_Genome\_Tile|1  
GTAAATTGCTATACCCTGTAATAATGAGAGGGGAATAGTGTGACCTGCAAGAAATTGTGC  
>HPV41\_Nu\_9626041\_nt0681\_Genome\_Tile|1  
TTGTTACAGCAGGGGGAGGTACCTGAGAATGCTGCAGTGCATTACAGGGGAGCATTCTGATG



>HPV41\_Nu\_9626041\_nt0761\_Genome\_Tile|1  
GAGGAGCGGGAACAGGTGCAGCAAGTCCCCACACCCAGGAGAACATTATACCTGGTAGAG  
>HPV41\_Nu\_9626041\_nt0801\_Genome\_Tile|1  
GAACATTATACCTGGTAGAGAGTCAGTGTCCATTTTGCCAGGCTATCATACGATTTGTAT  
>HPV41\_Nu\_9626041\_nt0861\_Genome\_Tile|1  
GCGTAGCAAGCAACACTGGGATACGGAATCTACAGGCACTCCTGGTCAACAGTCACCTTG  
>HPV41\_Nu\_9626041\_nt0901\_Genome\_Tile|1  
CCTGGTCAACAGTCACCTTGACCTCGCTTGTCACGCCTGTGTGCGAGCAGAATGGCGTCCA  
>HPV41\_Nu\_9626041\_nt0941\_Genome\_Tile|1  
GTGCGAGCAGAATGGCGTCCAGGGTCTCAGACACCGGCAATGGCAATGAAAACAAAGAGAA  
>HPV41\_Nu\_9626041\_nt1081\_Genome\_Tile|1  
ACGATGAGGAAAGTATGGAGGATAGCTTGGTGGAAGACCTTGTGGATGATGCTTCTGTGC  
>HPV41\_Nu\_9626041\_nt1121\_Genome\_Tile|1  
TGTGGATGATGCTTCTGTGCATCAGGGAAATTCCTTGTGCTGTTCATGCCCAAACCTGT  
>HPV41\_Nu\_9626041\_nt1141\_Genome\_Tile|1  
ATCAGGGAAATTCCTTGTGCTGTTCATGCCCAAACCTGTGCGAGGAATACGAGGGAGAGA  
>HPV41\_Nu\_9626041\_nt1161\_Genome\_Tile|1  
CTGTTTCATGCCCAAACCTGTGCGAGGAATACGAGGGAGAGATCCAGAGCCTAAAACGAAAG  
>HPV41\_Nu\_9626041\_nt1181\_Genome\_Tile|1  
CGAGGAATACGAGGGAGAGATCCAGAGCCTAAAACGAAAGTTTATCCTGAGTCCCTTGCA  
>HPV41\_Nu\_9626041\_nt1201\_Genome\_Tile|1  
TCCAGAGCCTAAAACGAAAGTTTATCCTGAGTCCCTTGCATAGGGATGTGGCAGAACTAA  
>HPV41\_Nu\_9626041\_nt1241\_Genome\_Tile|1  
TAGGGATGTGGCAGAACTAAGCCCGCTCTGGCGGGTGTTCCTGGAAGAAAACCGTGG  
>HPV41\_Nu\_9626041\_nt1261\_Genome\_Tile|1  
GCCCCGCTCTGGCGGGTGTTCCTGGAAGAAAACCGTGGGAAAAAGGCTCGCAAATCTC  
>HPV41\_Nu\_9626041\_nt1321\_Genome\_Tile|1  
TGTTCCACGATGACAGTGGCATAGACAGCAGCGCAGTGAAGTCTCCAGCTATCTAGTA  
>HPV41\_Nu\_9626041\_nt1361\_Genome\_Tile|1  
AGTCTCCAGCTATCTAGTACGCCATCAGCTCCAGGGCCAGACATCCGGCTGCCTAAACC  
>HPV41\_Nu\_9626041\_nt1381\_Genome\_Tile|1  
CGCCATCAGCTCCAGGGCCAGACATCCGGCTGCCTAAACCCTCAGATATAGATCTAGAGC  
>HPV41\_Nu\_9626041\_nt1441\_Genome\_Tile|1  
CACTGTTCCAAAGCCGCCAGCGCTGTACGCATATGTATAGCAAATTTAAAGCTGTGTACG  
>HPV41\_Nu\_9626041\_nt1461\_Genome\_Tile|1  
CGCTGTACGCATATGTATAGCAAATTTAAAGCTGTGTACGGGGTTAGCTTTACAGATATA  
>HPV41\_Nu\_9626041\_nt1501\_Genome\_Tile|1  
GGGTTAGCTTTACAGATATAACCAGGCCATTCAAAGCGACAAAACAACATCACAGCATT  
>HPV41\_Nu\_9626041\_nt1541\_Genome\_Tile|1  
CAAAACAACATCACAGCATTGGGTGTGGCCGCCTACTATTTAGCTTTTGATAGTGAGAT  
>HPV41\_Nu\_9626041\_nt1561\_Genome\_Tile|1  
GGGTGTGGCCGCCTACTATTTAGCTTTTGATAGTGAGATAAGTGCTATGGAGGTTTGC  
>HPV41\_Nu\_9626041\_nt1601\_Genome\_Tile|1  
AAGTGCTATGGAGGTTTTGCTGCGACAACAATGCCAATTTTTATACATTGACAACAATGA  
>HPV41\_Nu\_9626041\_nt1621\_Genome\_Tile|1  
TGCGACAACAATGCCAATTTTTATACATTGACAACAATGATGGCATTATACTGTTCTTCC  
>HPV41\_Nu\_9626041\_nt1681\_Genome\_Tile|1  
TGGAATACAACGTGCAGAAATCTAGGACTACAGTGTACAATTGGTTCACAGCCAATTTCC  
>HPV41\_Nu\_9626041\_nt1701\_Genome\_Tile|1  
TCTAGGACTACAGTGTACAATTGGTTCACAGCCAATTTCCATTATAATGAAAATAGAATG  
>HPV41\_Nu\_9626041\_nt1721\_Genome\_Tile|1  
TTGGTTCACAGCCAATTTCCATTATAATGAAAATAGAATGCTAGCTAATCCGCCAAGGAC  
>HPV41\_Nu\_9626041\_nt1741\_Genome\_Tile|1  
ATTATAATGAAAATAGAATGCTAGCTAATCCGCCAAGGACACGAAACATGCCTGCTGCTT  
>HPV41\_Nu\_9626041\_nt1761\_Genome\_Tile|1

CTAGCTAATCCGCCAAGGACACGAAACATGCCTGCTGCTTTATTCTTCTATCATAGATTT  
>HPV41\_Nu\_9626041\_nt1781\_Genome\_Tile|1  
ACGAAACATGCCTGCTGCTTTATTCTTCTATCATAGATTTATGGGTACAGGGGGTATAAA  
>HPV41\_Nu\_9626041\_nt1801\_Genome\_Tile|1  
TATTCTTCTATCATAGATTTATGGGTACAGGGGGTATAAAACATGGCGCAATGCCAGAAA  
>HPV41\_Nu\_9626041\_nt1841\_Genome\_Tile|1  
ACATGGCGCAATGCCAGAAATAATTGTAAACCAGTGCGTGGTGTCTAATCAGCAGACAGA  
>HPV41\_Nu\_9626041\_nt1861\_Genome\_Tile|1  
TAATTGTAAACCAGTGCGTGGTGTCTAATCAGCAGACAGACACCTTTGAATTATCACGTA  
>HPV41\_Nu\_9626041\_nt1901\_Genome\_Tile|1  
CACCTTTGAATTATCACGTATGGTACAGTGGGCACTGGACAACGATCTGCAAGATGAACA  
>HPV41\_Nu\_9626041\_nt1921\_Genome\_Tile|1  
TGGTACAGTGGGCACTGGACAACGATCTGCAAGATGAACATATGTTAGCTTTAGAGTATG  
>HPV41\_Nu\_9626041\_nt1941\_Genome\_Tile|1  
AACGATCTGCAAGATGAACATATGTTAGCTTTAGAGTATGCTTTGCTTGCTGAAAGTGAT  
>HPV41\_Nu\_9626041\_nt1961\_Genome\_Tile|1  
TATGTTAGCTTTAGAGTATGCTTTGCTTGCTGAAAGTGATGGCAATGCGCGGGCTTTTTT  
>HPV41\_Nu\_9626041\_nt2001\_Genome\_Tile|1  
GGCAATGCGCGGGCTTTTTTAAAGCAGAATAATCAGCCAATGATAGTGAAGAATTGTAGC  
>HPV41\_Nu\_9626041\_nt2021\_Genome\_Tile|1  
AAAGCAGAATAATCAGCCAATGATAGTGAAGAATTGTAGCATAATGGTTAGACACTACAA  
>HPV41\_Nu\_9626041\_nt2041\_Genome\_Tile|1  
TGATAGTGAAGAATTGTAGCATAATGGTTAGACACTACAAGACAGCGCTGGTCGCAAAAA  
>HPV41\_Nu\_9626041\_nt2061\_Genome\_Tile|1  
ATAATGGTTAGACACTACAAGACAGCGCTGGTCGCAAAAATGTCTATTTACAGTATGTG  
>HPV41\_Nu\_9626041\_nt2081\_Genome\_Tile|1  
GACAGCGCTGGTCGCAAAAATGTCTATTTACAGTATGTGAATAAGCGGTGTCTGGACCA  
>HPV41\_Nu\_9626041\_nt2101\_Genome\_Tile|1  
TGTCTATTTACAGTATGTGAATAAGCGGTGTCTGGACCATGGGGAAGCTGATGAAAACA  
>HPV41\_Nu\_9626041\_nt2121\_Genome\_Tile|1  
AATAAGCGGTGTCTGGACCATGGGGAAGCTGATGAAAACAGCTGGCGGGGAATTGTGCAT  
>HPV41\_Nu\_9626041\_nt2141\_Genome\_Tile|1  
TGGGGAAGCTGATGAAAACAGCTGGCGGGGAATTGTGCATTTTCTGAGGTATCAAGGTCA  
>HPV41\_Nu\_9626041\_nt2161\_Genome\_Tile|1  
GCTGGCGGGGAATTGTGCATTTTCTGAGGTATCAAGGTCAGGAATTCCTGCCCTTCATGT  
>HPV41\_Nu\_9626041\_nt2181\_Genome\_Tile|1  
TTTCTGAGGTATCAAGGTCAGGAATTCCTGCCCTTCATGTGTAAAATGCACAATTCCTA  
>HPV41\_Nu\_9626041\_nt2201\_Genome\_Tile|1  
GGAATTCCTGCCCTTCATGTGTAAAATGCACAATTCCTACACCATAGACCAAAGAAATC  
>HPV41\_Nu\_9626041\_nt2381\_Genome\_Tile|1  
ACCATTACGTGGGGCACGGTGTCTAATAGACGATGCGACCCTCACGTTTTGGAGGTA  
>HPV41\_Nu\_9626041\_nt2401\_Genome\_Tile|1  
GCTGTCTAATAGACGATGCGACCCTCACGTTTTGGAGGTACGCGGACCAAAACATGAGGG  
>HPV41\_Nu\_9626041\_nt2441\_Genome\_Tile|1  
CGCGGACCAAAACATGAGGGCACTGCTAGATGGATATGAGATTTCCATTGATGCAAAACA  
>HPV41\_Nu\_9626041\_nt2461\_Genome\_Tile|1  
CACTGCTAGATGGATATGAGATTTCCATTGATGCAAAACACAGAAACCAATGCAAACTA  
>HPV41\_Nu\_9626041\_nt2481\_Genome\_Tile|1  
ATTTCCATTGATGCAAAACACAGAAACCAATGCAAACTAGAGCACCACCATTAAATAATA  
>HPV41\_Nu\_9626041\_nt2501\_Genome\_Tile|1  
CAGAAACCAATGCAAACTAGAGCACCACCATTAAATAAACCACAAATGAGGACATTAT  
>HPV41\_Nu\_9626041\_nt2541\_Genome\_Tile|1  
ACCACAAATGAGGACATTATGCGATTAGATGAATTCAAATATCTGCAAACCAGAACAAATG  
>HPV41\_Nu\_9626041\_nt2581\_Genome\_Tile|1  
ATCTGCAAACCAGAACAAATGTATGTGTACTTTAACAAGCCATTTCTCTTAAAGGAAATG

>HPV41\_Nu\_9626041\_nt2661\_Genome\_Tile|1  
GATGGTTATACATGGAACCTTTTTTTTAGGAAATTTTGGCGTCACCTAAATCTAAAAGAC  
>HPV41\_Nu\_9626041\_nt2681\_Genome\_Tile|1  
TTTTTTTAGGAAATTTTGGCGTCACCTAAATCTAAAAGACCCTGAGGATGAGTCAGATGG  
>HPV41\_Nu\_9626041\_nt2701\_Genome\_Tile|1  
GTCACCTAAATCTAAAAGACCCTGAGGATGAGTCAGATGGAGAGACTCCTGGAACGATTA  
>HPV41\_Nu\_9626041\_nt2721\_Genome\_Tile|1  
CCTGAGGATGAGTCAGATGGAGAGACTCCTGGAACGATTAGACTATATACAAGAGCAGAT  
>HPV41\_Nu\_9626041\_nt2741\_Genome\_Tile|1  
AGAGACTCCTGGAACGATTAGACTATATACAAGAGCAGATACTGACACTATATGAGAAAG  
>HPV41\_Nu\_9626041\_nt2761\_Genome\_Tile|1  
GACTATATACAAGAGCAGATACTGACACTATATGAGAAAGATAGTGTGACCTAGAGGAT  
>HPV41\_Nu\_9626041\_nt2781\_Genome\_Tile|1  
ACTGACACTATATGAGAAAGATAGTGTGACCTAGAGGATCATATAAGGCTATGGAATCT  
>HPV41\_Nu\_9626041\_nt2801\_Genome\_Tile|1  
ATAGTGTGACCTAGAGGATCATATAAGGCTATGGAATCTGCTAAGGAGGGAAAATGCAA  
>HPV41\_Nu\_9626041\_nt2821\_Genome\_Tile|1  
CATATAAGGCTATGGAATCTGCTAAGGAGGGAAAATGCAATCTGGTATGTACTCAGACAG  
>HPV41\_Nu\_9626041\_nt2861\_Genome\_Tile|1  
TCTGGTATGTACTCAGACAGGAAGGACACGCAAGGGTCGGCGGCAGAGCGGTGCCGGCAA  
>HPV41\_Nu\_9626041\_nt2901\_Genome\_Tile|1  
CGGCAGAGCGGTGCCGGCAATGACGGTATCGGAAGCCAATGCCAAATTCGCAATAGAAAT  
>HPV41\_Nu\_9626041\_nt2921\_Genome\_Tile|1  
TGACGGTATCGGAAGCCAATGCCAAATTCGCAATAGAAATGCAGATAAAGCTAGAATCAC  
>HPV41\_Nu\_9626041\_nt2941\_Genome\_Tile|1  
GCCAAATTCGCAATAGAAATGCAGATAAAGCTAGAATCACTAAAGGCCAGTCCCCTATGCG  
>HPV41\_Nu\_9626041\_nt2981\_Genome\_Tile|1  
TAAAGGCCAGTCCCCTATGCGGCCGAGGGCTGGTCATTGCAAGAAACCACCAAGGAACGGT  
>HPV41\_Nu\_9626041\_nt3001\_Genome\_Tile|1  
GCCGAGGGCTGGTCATTGCAAGAAACCACCAAGGAACGGTACTTGGCTGAACCGTCTCGG  
>HPV41\_Nu\_9626041\_nt3021\_Genome\_Tile|1  
AGAAACCACCAAGGAACGGTACTTGGCTGAACCGTCTCGGACATTTAAGAAATTAGGGCA  
>HPV41\_Nu\_9626041\_nt3061\_Genome\_Tile|1  
ACATTTAAGAAATTAGGGCAGCCAGTTACCCTAATGTTTGACAATGATCCCGAAAACCTT  
>HPV41\_Nu\_9626041\_nt3101\_Genome\_Tile|1  
ACAATGATCCCGAAAACCTTACAGAAGTTGTATTGTGGAAATGGGTTTATTATATTACAC  
>HPV41\_Nu\_9626041\_nt3121\_Genome\_Tile|1  
ACAGAAGTTGTATTGTGGAAATGGGTTTATTATATTACACCAACAGATGAATGGTATAAA  
>HPV41\_Nu\_9626041\_nt3141\_Genome\_Tile|1  
ATGGGTTTATTATATTACACCAACAGATGAATGGTATAAAGCTAGAGGTGGCATTGATGA  
>HPV41\_Nu\_9626041\_nt3161\_Genome\_Tile|1  
CAACAGATGAATGGTATAAAGCTAGAGGTGGCATTGATGACACTGGTATATACTACATTG  
>HPV41\_Nu\_9626041\_nt3181\_Genome\_Tile|1  
GCTAGAGGTGGCATTGATGACACTGGTATATACTACATTGACCACGAGTCTGTTAAAATG  
>HPV41\_Nu\_9626041\_nt3201\_Genome\_Tile|1  
CACTGGTATATACTACATTGACCACGAGTCTGTTAAAATGTACTATGTGAGATTTGACAT  
>HPV41\_Nu\_9626041\_nt3221\_Genome\_Tile|1  
ACCACGAGTCTGTTAAAATGTACTATGTGAGATTTGACATGGAAGCGGAGAACTTTAGCG  
>HPV41\_Nu\_9626041\_nt3241\_Genome\_Tile|1  
TACTATGTGAGATTTGACATGGAAGCGGAGAACTTTAGCGAGACAGGCACTGTCACCTAC  
>HPV41\_Nu\_9626041\_nt3301\_Genome\_Tile|1  
CGGCTAGGCAGCGCCCTGGTAAATGTACCTGAACCTGTAACCTGTTACCGACAGCTCCTCC  
>HPV41\_Nu\_9626041\_nt3321\_Genome\_Tile|1  
AAATGTACCTGAACCTGTAACCTGTTACCGACAGCTCCTCCACGAGGGAGAGAACCCCAA  
>HPV41\_Nu\_9626041\_nt3361\_Genome\_Tile|1

ACGAGGGAGAGAACCCCAAAGGTACTACGACCGCAGGGGTCGAGACGACGCAGAAACGAG  
>HPV41\_Nu\_9626041\_nt3401\_Genome\_Tile|1  
CGAGACGACGCAGAAACGAGGAAACGGGGGAGCCGGTCGCCCCAGCCCCTAAGCGAAGAC  
>HPV41\_Nu\_9626041\_nt3461\_Genome\_Tile|1  
GAGGAGCTTACGACGCAGATCCTCCCCGAAGGCCAACGCAGGACCGCGGCGTCGCCTG  
>HPV41\_Nu\_9626041\_nt3501\_Genome\_Tile|1  
CAGGACCGCGGCGTCGCCTGTTTCTAGAGGAAACGGAGGATCGTCTGACTTCACTTCTGG  
>HPV41\_Nu\_9626041\_nt3581\_Genome\_Tile|1  
GAGTCAGACATAGAGCACTTCGAAAGAAAACGCGGGTGTTGCTCCAGCAGAAGGACACT  
>HPV41\_Nu\_9626041\_nt3681\_Genome\_Tile|1  
CTTAAGGTACAAATGGAAAAACAAGTATAGCGGTGACATAATGTATCTGGGGACTACTTT  
>HPV41\_Nu\_9626041\_nt3701\_Genome\_Tile|1  
ACAAGTATAGCGGTGACATAATGTATCTGGGGACTACTTTCACATGGACGGAGTCTGACG  
>HPV41\_Nu\_9626041\_nt3721\_Genome\_Tile|1  
ATGTATCTGGGGACTACTTTCACATGGACGGAGTCTGACGGGACAGAACGGTGTGGGTCG  
>HPV41\_Nu\_9626041\_nt3761\_Genome\_Tile|1  
GGACAGAACGGTGTGGGTCGGGGCGCTTTTTTTGTGCTTTCTCTAATGAAACAAAAAGAG  
>HPV41\_Nu\_9626041\_nt3781\_Genome\_Tile|1  
GGGCGCTTTTTTTGTGCTTTCTCTAATGAAACAAAAAGAGAAAGTTCCCTCAAATCTGTC  
>HPV41\_Nu\_9626041\_nt3801\_Genome\_Tile|1  
CTCTAATGAAACAAAAAGAGAAAGTTCCCTCAAATCTGTCAAGATTCCTAAAAACATTGG  
>HPV41\_Nu\_9626041\_nt3841\_Genome\_Tile|1  
AAGATTCCCTAAAAACATTGGGCTGTTTCGCGCACACGCAGAAAAGCTGTGACCTGTGTAT  
>HPV41\_Nu\_9626041\_nt3901\_Genome\_Tile|1  
CATTAACAATGCTTGCTAGGCAAAGGGTTAAACGCGCTAATCCTGAACAACCTGTATAAG  
>HPV41\_Nu\_9626041\_nt3921\_Genome\_Tile|1  
GCAAAGGGTTAAACGCGCTAATCCTGAACAACCTGTATAAGACATGCAAAGCAACGGGGG  
>HPV41\_Nu\_9626041\_nt3981\_Genome\_Tile|1  
CGATTGTCCACCCGATGTTATTAAACGCTATGAGCAAACCTACACCTGCTGATAGTATATT  
>HPV41\_Nu\_9626041\_nt4001\_Genome\_Tile|1  
TTAAACGCTATGAGCAAACCTACACCTGCTGATAGTATATTAAAGTATGGGAGTGTAGGGG  
>HPV41\_Nu\_9626041\_nt4181\_Genome\_Tile|1  
TGCCAATTGAATCAGGGGGGCTTCACTGGCAGAGGAAATACCTCTGCTTCCCATGGCAC  
>HPV41\_Nu\_9626041\_nt4221\_Genome\_Tile|1  
ACCTCTGCTTCCCATGGCACCCCGTGTGCCAAGGCCTACAGATCCCTTTTCGGCCGTCAGT  
>HPV41\_Nu\_9626041\_nt4341\_Genome\_Tile|1  
TTTCCCTACAGACGCTGCACCATTTGACAATGGCAACACAGAAATCACAACCATTCCCTAG  
>HPV41\_Nu\_9626041\_nt4361\_Genome\_Tile|1  
CATTTGACAATGGCAACACAGAAATCACAACCATTCCCTAGCCAATATGATGTTAGTGGGG  
>HPV41\_Nu\_9626041\_nt4381\_Genome\_Tile|1  
GAAATCACAACCATTCCCTAGCCAATATGATGTTAGTGGGGGAGGGGTTGACATTCAGATA  
>HPV41\_Nu\_9626041\_nt4401\_Genome\_Tile|1  
CCAATATGATGTTAGTGGGGGAGGGGTTGACATTCAGATAATTGAACTCCCTAGTGTGAA  
>HPV41\_Nu\_9626041\_nt4441\_Genome\_Tile|1  
ATTGAACTCCCTAGTGTGAATGACCCCGTCCCTCGGTTGTTACCCGCACACAATACAAC  
>HPV41\_Nu\_9626041\_nt4461\_Genome\_Tile|1  
TGACCCCGGTCCCTCGGTTGTTACCCGCACACAATACAACAATCCAACGTTTGAGGTGGA  
>HPV41\_Nu\_9626041\_nt4481\_Genome\_Tile|1  
TTACCCGCACACAATACAACAATCCAACGTTTGAGGTGGAGGTGTCCACTGACATTAGTG  
>HPV41\_Nu\_9626041\_nt4501\_Genome\_Tile|1  
AATCCAACGTTTGAGGTGGAGGTGTCCACTGACATTAGTGGAGAAACCTCATCAACGGAC  
>HPV41\_Nu\_9626041\_nt4541\_Genome\_Tile|1  
GAGAAACCTCATCAACGGACAACATTATTGTAGGAGCTGAAAGCGGTGGCACATCCGTAG  
>HPV41\_Nu\_9626041\_nt4561\_Genome\_Tile|1  
AACATTATTGTAGGAGCTGAAAGCGGTGGCACATCCGTAGGTGACAATGCTGAACTGATA

>HPV41\_Nu\_9626041\_nt4601\_Genome\_Tile|1  
GTGACAATGCTGAACTGATACCTTTGCTAGATATATCCCGGGGGGACACAATTGACACAA  
>HPV41\_Nu\_9626041\_nt4621\_Genome\_Tile|1  
CCTTTGCTAGATATATCCCGGGGGGACACAATTGACACAACAATACTTGCCCCTGGCGAG  
>HPV41\_Nu\_9626041\_nt4661\_Genome\_Tile|1  
CAATACTTGCCCCCTGGCGAGGAGGAGACTGCCCTTTGTGACCAGCACTCCTGAACGTGTGC  
>HPV41\_Nu\_9626041\_nt4681\_Genome\_Tile|1  
GAGGAGACTGCCTTTGTGACCAGCACTCCTGAACGTGTGCCTATACAGGAGCGATTACCT  
>HPV41\_Nu\_9626041\_nt4721\_Genome\_Tile|1  
CTATACAGGAGCGATTACCTATTAGGCCCTATGGCAGACAGTATCAGCAAGTGCGAGTTA  
>HPV41\_Nu\_9626041\_nt4761\_Genome\_Tile|1  
GTATCAGCAAGTGCGAGTTACCGACCCTGAATTTTTAGACAGCGCTGCAGTACTTGTCTC  
>HPV41\_Nu\_9626041\_nt4781\_Genome\_Tile|1  
CCGACCCTGAATTTTTAGACAGCGCTGCAGTACTTGTCTCTTTAGAGAATCCAGTGTTTG  
>HPV41\_Nu\_9626041\_nt4861\_Genome\_Tile|1  
TTTGAGGATGATCTGCAGCAGGCACTACGTAGTGACACAGACCTGCGGGACGTGCGTCGC  
>HPV41\_Nu\_9626041\_nt4881\_Genome\_Tile|1  
GGCACTACGTAGTGACACAGACCTGCGGGACGTGCGTCGCTCAGTAGACCTTATTACCA  
>HPV41\_Nu\_9626041\_nt4941\_Genome\_Tile|1  
GAGGCGCACTACTGGCCTTCGTGTTAGTCGCCCTGGGGCAACGTGCGGGTACTATATCCAC  
>HPV41\_Nu\_9626041\_nt4961\_Genome\_Tile|1  
GTGTTAGTCGCCCTGGGGCAACGTGCGGGTACTATATCCACGCGCTCTGGTGTTTCAGGTAG  
>HPV41\_Nu\_9626041\_nt4981\_Genome\_Tile|1  
CGTCGCGGGTACTATATCCACGCGCTCTGGTGTTTCAGGTAGGCTCCGCTGCTCATTTTTTC  
>HPV41\_Nu\_9626041\_nt5021\_Genome\_Tile|1  
GCTCCGCTGCTCATTTTTTCCAGGACATTAGTCCAATCGGCCAGGCTATTGAGCCAATTG  
>HPV41\_Nu\_9626041\_nt5041\_Genome\_Tile|1  
CAGGACATTAGTCCAATCGGCCAGGCTATTGAGCCAATTGATGCAATTGAACTAGATGTA  
>HPV41\_Nu\_9626041\_nt5081\_Genome\_Tile|1  
ATGCAATTGAACTAGATGTACTGGGTGAGCAATCCGGTGAGGGGACTATTGTGAGAGGAG  
>HPV41\_Nu\_9626041\_nt5101\_Genome\_Tile|1  
CTGGGTGAGCAATCCGGTGAGGGGACTATTGTGAGAGGAGACCCTACGCCTTCTATTGAG  
>HPV41\_Nu\_9626041\_nt5121\_Genome\_Tile|1  
GGGGACTATTGTGAGAGGAGACCCTACGCCTTCTATTGAGCAAGACATAGGACTAACCGC  
>HPV41\_Nu\_9626041\_nt5141\_Genome\_Tile|1  
ACCCTACGCCTTCTATTGAGCAAGACATAGGACTAACCGCTTTGGGGGACAACATTGAAA  
>HPV41\_Nu\_9626041\_nt5161\_Genome\_Tile|1  
CAAGACATAGGACTAACCGCTTTGGGGGACAACATTGAAAATGAATTGCAGGAAATAGAT  
>HPV41\_Nu\_9626041\_nt5181\_Genome\_Tile|1  
TTTGGGGGACAACATTGAAAATGAATTGCAGGAAATAGATTTATTAAGTGCAGGATGGTGA  
>HPV41\_Nu\_9626041\_nt5201\_Genome\_Tile|1  
ATGAATTGCAGGAAATAGATTTATTAAGTGCAGGATGGTGAAGAAGACCAGGAGGGCAGAG  
>HPV41\_Nu\_9626041\_nt5261\_Genome\_Tile|1  
ACCTGCAGTTGGTATTTTCCACTGGCAATGATGAGGTGGTTGATATTATGACTATACCTA  
>HPV41\_Nu\_9626041\_nt5281\_Genome\_Tile|1  
ACTGGCAATGATGAGGTGGTTGATATTATGACTATACCTATACGTGCAGGCGGGGATGAC  
>HPV41\_Nu\_9626041\_nt5301\_Genome\_Tile|1  
TGATATTATGACTATACCTATACGTGCAGGCGGGGATGACAGGCCTTCAGTATTTATTTT  
>HPV41\_Nu\_9626041\_nt5321\_Genome\_Tile|1  
TACGTGCAGGCGGGGATGACAGGCCTTCAGTATTTATTTTATGCGATGATGGCACTCACA  
>HPV41\_Nu\_9626041\_nt7041\_Genome\_Tile|1  
CCCTTACTACCTACAGGCGGCCTACTAAGCGCCGCCGAAGGCTTAAACGAATTGCTGGT  
>HPV41\_Nu\_9626041\_nt7061\_Genome\_Tile|1  
CCTACTAAGCGCCGCCGAAGGCTTAAACGAATTGCTGGTATTGTGGTGCGGTGTCCTCG  
>HPV41\_Nu\_9626041\_nt7141\_Genome\_Tile|1

TAATCACTTGGTCAGTCCAGGGTACACCACTCCATTATCTATTTACTTCGCATGTATTTTC  
>HPV41\_Nu\_9626041\_nt7161\_Genome\_Tile|1  
GGTACACCACTCCATTATCTATTTACTTCGCATGTATTTCTCTGTTATGTTCTGTATGG  
>HPV41\_Nu\_9626041\_nt7201\_Genome\_Tile|1  
TCTGTTATGTTCTGTATGGGTTATGAATGTGTTAATAAAATATGTTGGTAACGCTGTGC  
>HPV41\_Nu\_9626041\_nt7221\_Genome\_Tile|1  
GTTATGAATGTGTTAATAAAATATGTTGGTAACGCTGTGCACGGGTTTGTTCACGTTTCAT  
>HPV41\_Nu\_9626041\_nt7241\_Genome\_Tile|1  
ATATGTTGGTAACGCTGTGCACGGGTTTGTTCACGTTTCATGTCTCATGATTTGGCACCCC  
>HPV41\_Nu\_9626041\_nt7281\_Genome\_Tile|1  
GTCTCATGATTTGGCACCCCTGTATTTCCCGCCGCCGCCGGGGGATCGCAGATATAATCC  
>HPV41\_Nu\_9626041\_nt7301\_Genome\_Tile|1  
TGTATTTCCCGCCGCCGCCGGGGGATCGCAGATATAATCCCCAAACCCAAAGCGTTCCAA  
>HPV41\_Nu\_9626041\_nt7321\_Genome\_Tile|1  
GGGGATCGCAGATATAATCCCCAAACCCAAAGCGTTCCAACATTGGCAAACGTCTCTGGC  
>HPV41\_Nu\_9626041\_nt7341\_Genome\_Tile|1  
CCAAACCCAAAGCGTTCCAACATTGGCAAACGTCTCTGGCCCCGATACAACCTGAAACGGT  
>HPV41\_Nu\_9626041\_nt7361\_Genome\_Tile|1  
CATTGGCAAACGTCTCTGGCCCCGATACAACCTGAAACGGTCTGTCTTGCCAATAGCCCCA  
>HPV41\_Nu\_9626041\_nt7381\_Genome\_Tile|1  
CCCAGTACAACCTGAAACGGTCTGTCTTGCCAATAGCCCCATCTGGCGGGGATTCAACTGA  
>HPV41\_Nu\_9626041\_nt7421\_Genome\_Tile|1  
TCTGGCGGGGATTCAACTGAAACGGTGTGTACTGCCAAGTAACATTTTTGTTATTGGAAC  
>HPV41\_Nu\_9626041\_nt7481\_Genome\_Tile|1  
GCCTCCGGTGTGGCGGAAGCGCAAGGATTTAGGCGCGAAGACAGTTTTATTGCCAAAAC  
>HPV72\_Alpha\_1491683\_nt0061\_Genome\_Tile|1  
AGGTACATATATAAGGGAAGTGTGAACCTCAGCAAATCAGCAATGCCTATGGGACTGCACA  
>HPV72\_Alpha\_1491683\_nt0621\_Genome\_Tile|1  
AGTCAGAGTCAGAGGATGAGAGGGACGGTGTGTTGGTGTGCAGGAGCAACTTGTAGAACAAAG  
>HPV72\_Alpha\_1491683\_nt1261\_Genome\_Tile|1  
GCACCAGAAAGCCAGGTATCGGGGGGTACACAGCATACAAAGGGGGGAGGCGGCGCCGTT  
>HPV72\_Alpha\_1491683\_nt1281\_Genome\_Tile|1  
GGGGGGTACACAGCATACAAAGGGGGGAGGCGGCGCCGTTTACAGGAAGCGGAAGAGGAGCG  
>HPV72\_Alpha\_1491683\_nt1341\_Genome\_Tile|1  
TGTGGGGGGGGATGGTGAAGCGCAGTGTAGTGCACAGACACAGCAAACGCCAGAGAGAGC  
>HPV72\_Alpha\_1491683\_nt1381\_Genome\_Tile|1  
CAGCAAACGCCAGAGAGAGCAGCAGACGTACTAGAAATATTTAAGGTTAGTAATTTGCGT  
>HPV72\_Alpha\_1491683\_nt1401\_Genome\_Tile|1  
AGCAGACGTACTAGAAATATTTAAGGTTAGTAATTTGCGTGTACATTACTGCATAAATT  
>HPV72\_Alpha\_1491683\_nt2541\_Genome\_Tile|1  
GAAGACCAGGCATTTAAATATTTGCACAGTAGAATAGTGTGTTGTTTAAATTTATGCATAAG  
>HPV72\_Alpha\_1491683\_nt2581\_Genome\_Tile|1  
TGTTTAAATTTATGCATAAGTGCCCATTAATAAGCAACGGTGATCCCGTATATACCCTAA  
>HPV72\_Alpha\_1491683\_nt3101\_Genome\_Tile|1  
TAAAAGCAGTGAGTATGTGAGCTGGGGGTGATTTATGTGCAAAGTACAGAGGACGAAC  
>HPV72\_Alpha\_1491683\_nt3141\_Genome\_Tile|1  
GCAAAGTACAGAGGACGAACAGTGGTATAAAGTACAAGGACATGTGTATATCATGGGCT  
>HPV72\_Alpha\_1491683\_nt3161\_Genome\_Tile|1  
AGTGGTATAAAGTACAAGGACATGTGTATATCATGGGCTATATTATGAATTTTACGGGTC  
>HPV72\_Alpha\_1491683\_nt3181\_Genome\_Tile|1  
CATGTGTATATCATGGGCTATATTATGAATTTTACGGGTCAGAAACAGTACTATGTAACA  
>HPV72\_Alpha\_1491683\_nt3201\_Genome\_Tile|1  
ATATTATGAATTTTACGGGTCAGAAACAGTACTATGTAACATTTGGACACGAAGCCAGAAA  
>HPV72\_Alpha\_1491683\_nt3521\_Genome\_Tile|1  
AAAGAGACATCTGCAGGCAACGGCGTGACAGTGCTGACCAGTGGGTCAACCGTGACAGTG

>HPV72\_Alpha\_1491683\_nt3541\_Genome\_Tile|1  
CGGCGTGACAGTGCTGACCAGTGGGTCAACCGTGACAGTGAAGTGCACACAACAAGCAAGG  
>HPV72\_Alpha\_1491683\_nt3561\_Genome\_Tile|1  
GTGGGTCAACCGTGACAGTGAAGTGCACACAACAAGCAAGGGACATCTGTAACAGTCACGG  
>HPV72\_Alpha\_1491683\_nt3661\_Genome\_Tile|1  
AAGTGTTCCTCGGTATAGGCTTCAGCAGTCAAGTGCCTAACTTGTTCCTTAAAGCATCCTCT  
>HPV72\_Alpha\_1491683\_nt3741\_Genome\_Tile|1  
GGGTGACACAACAAATGTGCATTTGTAACACTGTGGTATGTGGATACTGACCAACGGAC  
>HPV72\_Alpha\_1491683\_nt3861\_Genome\_Tile|1  
AATGTGTATATAATGTTTGTGCGATGGCAACCAAGTGTATAGAACCACACCTGCAACATT  
>HPV72\_Alpha\_1491683\_nt3881\_Genome\_Tile|1  
TGCGATGGCAACCAAGTGTATAGAACCACACCTGCAACATTATGTAAGGCAGAAGCAATCC  
>HPV72\_Alpha\_1491683\_nt4061\_Genome\_Tile|1  
TAGGATTGTTTGTATATATATGCAGGTGATGTGGTACATAGGTGACTTATAATCCACCC  
>HPV72\_Alpha\_1491683\_nt4081\_Genome\_Tile|1  
ATGCAGGTGATGTGGTACATAGGTGACTTATAATCCACCCAGCCATTACATGCTGCTATT  
>HPV72\_Alpha\_1491683\_nt4141\_Genome\_Tile|1  
GTGTAAATAGTGTTCCTTGTGTATCTTGTATGTAATATGTATCCTGTTGTAGTGGGCAAT  
>HPV72\_Alpha\_1491683\_nt4161\_Genome\_Tile|1  
GTATCTTGTATGTAATATGTATCCTGTTGTAGTGGGCAATACGGATGGGGGTGCATTAAT  
>HPV72\_Alpha\_1491683\_nt4181\_Genome\_Tile|1  
ATCCTGTTGTAGTGGGCAATACGGATGGGGGTGCATTAATTGTACTACGAGACGATAATT  
>HPV72\_Alpha\_1491683\_nt4221\_Genome\_Tile|1  
TGTACTACGAGACGATAATTGTGGATTGTGGTTCCTTCTTGTGTATGTTAATAATCATTGT  
>HPV72\_Alpha\_1491683\_nt4241\_Genome\_Tile|1  
GTGGATTGTGGTTCCTTCTTGTGTATGTTAATAATCATTGTAGTGTGCTATATAGGTTGC  
>HPV72\_Alpha\_1491683\_nt4261\_Genome\_Tile|1  
TGTATGTTAATAATCATTGTAGTGTGCTATATAGGTTGCTACACTGATCCCTTCCTTTT  
>HPV72\_Alpha\_1491683\_nt4301\_Genome\_Tile|1  
TACACTGATCCCTTCCTTTTGTGTATTCCCACCTCCTTTTTATTTTTGTTTGTGTTTGT  
>HPV72\_Alpha\_1491683\_nt4321\_Genome\_Tile|1  
GTGTATTTCCACCTCCTTTTTATTTTTGTTTGTGTTTGTGTTTGTGTTTGTGTTTGTG  
>HPV72\_Alpha\_1491683\_nt4341\_Genome\_Tile|1  
TATTTTTGTTTGTGTTTGTGTTTGTGTTTGTGTTTGTGTTTGTGTTTGTGTTTGTGTT  
>HPV72\_Alpha\_1491683\_nt4361\_Genome\_Tile|1  
TTTGTGTTTGTGTTTGTGTTTGTGTTTGTGTTTGTGTTTGTGTTTGTGTTTGTGTTTGT  
>HPV72\_Alpha\_1491683\_nt5101\_Genome\_Tile|1  
CAAGGCTAATCAACAGGTTAGGGTTACTAACCCCTGCCTTTTTGTCTCGACCCCAAGTCTCT  
>HPV72\_Alpha\_1491683\_nt5381\_Genome\_Tile|1  
CAGGACATTAGCCCATTTTCATCTGATACTATTGAAATGCAATCCTTGGCCTCCTCTACG  
>HPV72\_Alpha\_1491683\_nt5401\_Genome\_Tile|1  
ATCTGATACTATTGAAATGCAATCCTTGGCCTCCTCTACGCAGCCAGACATAACATATGA  
>HPV72\_Alpha\_1491683\_nt5461\_Genome\_Tile|1  
CATTTATGCTGACCTGATTTAGGGGAACCCCGCCGCTGCTTCTGTGTCTTCTACATC  
>HPV72\_Alpha\_1491683\_nt5501\_Genome\_Tile|1  
GCTTCTGTGTCTTCTACATCATTGCACAGCCCGTCCCTGTCTGCAGCGTCTGCTGTTTCT  
>HPV72\_Alpha\_1491683\_nt5561\_Genome\_Tile|1  
GCCAAGTATGACAATGTAACAGTTCCTTGTTCCTTAGGGCCACACATCCCTGCCTCCTCT  
>HPV72\_Alpha\_1491683\_nt5581\_Genome\_Tile|1  
AGTTCCCTGTTCCTTAGGGCCACACATCCCTGCCTCCTCTGGCCCTGACATTGATTTGTC  
>HPV72\_Alpha\_1491683\_nt5661\_Genome\_Tile|1  
CTACAATGCCTCTTGTACCCTCTACGCATCCACATTCTATTTATGTTGAGGGCTTTGATT  
>HPV72\_Alpha\_1491683\_nt6181\_Genome\_Tile|1  
ACACTTCCTTACTTGTGGCTGACAATTCTGACAGTCGGGACAATGTATCTGTTGACTACA  
>HPV72\_Alpha\_1491683\_nt6221\_Genome\_Tile|1

CAATGTATCTGTTGACTACAAACAGACCCAATTGCTTATTATAGGGTGCAAGCCTCCCAT  
>HPV72\_Alpha\_1491683\_nt6241\_Genome\_Tile|1  
AACAGACCCAATTGCTTATTATAGGGTGCAAGCCTCCCATTTGGTGAGCATTGGACCAAGG  
>HPV72\_Alpha\_1491683\_nt6281\_Genome\_Tile|1  
TGGTGAGCATTGGACCAAGGGCACTCCTTGTGCAGGCTCTAATTCTCAGCCAACTGACTG  
>HPV72\_Alpha\_1491683\_nt6561\_Genome\_Tile|1  
CATTTTTTTAATAGGCAGGGCACAATGGGTGAGGCACTACCAGCCAGTTTATATCTTAAA  
>HPV72\_Alpha\_1491683\_nt6581\_Genome\_Tile|1  
CACAAATGGGTGAGGCACTACCAGCCAGTTTATATCTTAAAGGTGCCTCGGGTAGCGACAG  
>HPV72\_Alpha\_1491683\_nt6601\_Genome\_Tile|1  
CAGCCAGTTTATATCTTAAAGGTGCCTCGGGTAGCGACAGGGTGACACCTGGTAGTTATA  
>HPV72\_Alpha\_1491683\_nt6821\_Genome\_Tile|1  
TATTTGTACTGCCACAGCGTCTCTGTATCAGAAATATACAGCTTCTAATTTTCGTGAGTA  
>HPV72\_Alpha\_1491683\_nt6841\_Genome\_Tile|1  
CCTCTGTATCAGAAATATACAGCTTCTAATTTTCGTGAGTATCTTCGCCACACTGAGGAAT  
>HPV72\_Alpha\_1491683\_nt7261\_Genome\_Tile|1  
CTACCTCGACCCCCGCCCTACTAAACGTAAAAAGCGCAAAAAGTAACATGTCATACTGT  
>HPV72\_Alpha\_1491683\_nt7301\_Genome\_Tile|1  
AAAGTAACATGTCATACTGTTTGTGTGGTGTATGTGTGTATGTGTGCAATGCATGCATGT  
>HPV72\_Alpha\_1491683\_nt7321\_Genome\_Tile|1  
TTGTGTGGTGTATGTGTGTATGTGTGCAATGCATGCATGTGTGTTTCTGTTGTTGTTTGT  
>HPV72\_Alpha\_1491683\_nt7401\_Genome\_Tile|1  
TTATGTTGTTGTATGTTTTTTGTATGGCCCCCTGCCCGTGTTGTGTATGTATGTGGAAT  
>HPV72\_Alpha\_1491683\_nt7521\_Genome\_Tile|1  
CCCTGTGAGTAAGTGTGTGTTTGCACGTTGTCCTACTTCCTACACTTTGTTTTGTGTCAC  
>HPV72\_Alpha\_1491683\_nt7561\_Genome\_Tile|1  
TACACTTTGTTTTGTGTACCTTTGTATGCCCTTTACTGTACTCCATTTTATATTTTCTC  
>HPV72\_Alpha\_1491683\_nt7581\_Genome\_Tile|1  
CTTTGTATGCCCTTTACTGTACTCCATTTTATATTTTCTCCATTTTGTATTCGCGACCGT  
>HPV72\_Alpha\_1491683\_nt7681\_Genome\_Tile|1  
GTACATAGAACTATGCATTGTGCTTTCCTCCACATCCTGTTTCAACAAACCTTATCCA  
>HPV72\_Alpha\_1491683\_nt7741\_Genome\_Tile|1  
CATCTGGGTGTGCCTGACAGGTTTCTGGCACATACATTTTCCATAGTTATGTGTTTCCTG  
>HPV72\_Alpha\_1491683\_nt7761\_Genome\_Tile|1  
GTTTCTGGCACATACATTTTCCATAGTTATGTGTTTCCTGACTCATTTTACAATAGATAT  
>HPV72\_Alpha\_1491683\_nt7861\_Genome\_Tile|1  
TTGCTGTTTTGGCTACCTTTCTAGGTGTTGTAGCCAAGTATGTGTCTTGCAACTATGGGC  
>HPV72\_Alpha\_1491683\_nt7881\_Genome\_Tile|1  
CTAGGTGTTGTAGCCAAGTATGTGTCTTGCAACTATGGGCAAGCCCTTTACAAACGTGTT  
>HPV97\_Alpha\_71726694\_nt0201\_Genome\_Tile|1  
ATGTTTAAACCTTTTTTCTAAAATTAGAGAATTACGATATTATTACATTCAGTGTATGG  
>HPV97\_Alpha\_71726694\_nt0221\_Genome\_Tile|1  
AAATTAGAGAATTACGATATTATTACATTCAGTGTATGGAGATACATTAGAAAAAATTA  
>HPV97\_Alpha\_71726694\_nt0341\_Genome\_Tile|1  
CAGCAGACAAATATAAACATCTTAAAGACAAACGACGATTCCACCACATATCTGGTTATT  
>HPV97\_Alpha\_71726694\_nt0521\_Genome\_Tile|1  
ATTGCATTTGCAACCCCAAAATGAAATAAATTCGGCTGACCTTCAATGTTATGAGCACCT  
>HPV97\_Alpha\_71726694\_nt0541\_Genome\_Tile|1  
ATGAAATAAATTCGGCTGACCTTCAATGTTATGAGCACCTAAGTGACTTAGAGGAAGAAT  
>HPV97\_Alpha\_71726694\_nt1261\_Genome\_Tile|1  
CCGTAAACACAAATATAAATAGAGAACATGGCGGCAGTTTATGTAGTAGTGGGAGTAGTA  
>HPV97\_Alpha\_71726694\_nt1281\_Genome\_Tile|1  
AGAGAACATGGCGGCAGTTTATGTAGTAGTGGGAGTAGTAGTGGGTGTATGGATGGTAAT  
>HPV97\_Alpha\_71726694\_nt1321\_Genome\_Tile|1  
GTGGGTGTATGGATGGTAATCATGATAATAGTAATATAGAAAATGAAAAATCCACAATTAG



>HPV97\_Alpha\_71726694\_nt1361\_Genome\_Tile|1  
AAATGAAAATCCACAATTAGTAATTGCAGAATTAAAAGACCTATTAAAGGCAAATAATAA  
>HPV97\_Alpha\_71726694\_nt1381\_Genome\_Tile|1  
TAATTGCAGAATTAAAAGACCTATTAAAGGCAAATAATAAAAAAGCTGCAATGTTAGCTG  
>HPV97\_Alpha\_71726694\_nt2461\_Genome\_Tile|1  
AGCACAAAGCCATTACTACAGTTAAAATGTCCGCCTATATTATTAACCTCAAATATTAATC  
>HPV97\_Alpha\_71726694\_nt2481\_Genome\_Tile|1  
TTAAAATGTCCGCCTATATTATTAACCTCAAATATTAATCCAGCTATAGATAACAGATGG  
>HPV97\_Alpha\_71726694\_nt3141\_Genome\_Tile|1  
ATGGGATAAAACAGAAGCATGTGTAAGTCACTGGGGACTCTATTATATGAAAGAAGGAAT  
>HPV97\_Alpha\_71726694\_nt3201\_Genome\_Tile|1  
GAAAACATTTTATGTGCAATTTGAACATGAAAGTAAAAAATATGGTAACAGTAATAAGTG  
>HPV97\_Alpha\_71726694\_nt3581\_Genome\_Tile|1  
AAAACAGTTTAAAATGTTTGCGGTATCGATTTAAAAAATATAATCAATACTATAGTTCTA  
>HPV97\_Alpha\_71726694\_nt3621\_Genome\_Tile|1  
TAATCAATACTATAGTTCTATATCATCAACCTGGCATTGGACAGATTCTGTAAATAAAAA  
>HPV97\_Alpha\_71726694\_nt3701\_Genome\_Tile|1  
TGTATGATAGTGAGCATCAACGAACCAAATTTTGGATAGTGTTCCTATTCCTAACAGTG  
>HPV97\_Alpha\_71726694\_nt3781\_Genome\_Tile|1  
ATGACAATGTAATATGTATATTGTATACAATGTGGTAAACAAATGTTAACATTTGTGTTT  
>HPV97\_Alpha\_71726694\_nt3961\_Genome\_Tile|1  
GTAAGTGCATTTACAGCATATGTATGTTTTTTTTTTTATTGCCTATGTTTTTTATTACACATA  
>HPV97\_Alpha\_71726694\_nt3981\_Genome\_Tile|1  
TGTATGTTTTTTTTTTTATTGCCTATGTTTTTTATTACACATACATGCTAGATATACATAACA  
>HPV97\_Alpha\_71726694\_nt4001\_Genome\_Tile|1  
CTATGTTTTTTATTACACATACATGCTAGATATACATAACATTACTTGTATATACTGTATT  
>HPV97\_Alpha\_71726694\_nt4021\_Genome\_Tile|1  
CATGCTAGATATACATAACATTACTTGTATATACTGTATTGTACAGTATCTTTTGTATTG  
>HPV97\_Alpha\_71726694\_nt4041\_Genome\_Tile|1  
TTACTTGTATATACTGTATTGTACAGTATCTTTTGTATTGCATAGTTTTTTTATACTTGT  
>HPV97\_Alpha\_71726694\_nt4061\_Genome\_Tile|1  
GTACAGTATCTTTTGTATTGCATAGTTTTTTTATACTTGTTTTGTATTATTGTTTACTGT  
>HPV97\_Alpha\_71726694\_nt4081\_Genome\_Tile|1  
CATAGTTTTTTTATACTTGTTTTGTATTATTGTTTACTGTTGTAATAAATATGGTATCCC  
>HPV97\_Alpha\_71726694\_nt5141\_Genome\_Tile|1  
AATTTCTGCAACAGACGACAGCAACTTATTTGATGTTTATGCTGACATTCCTACTACATC  
>HPV97\_Alpha\_71726694\_nt5161\_Genome\_Tile|1  
GCAACTTATTTGATGTTTATGCTGACATTCCCTACTACATCTGACACTAGTGTTACTGCTA  
>HPV97\_Alpha\_71726694\_nt5181\_Genome\_Tile|1  
GCTGACATTCCTACTACATCTGACACTAGTGTTACTGCTAACACAGCATTTACATACCCT  
>HPV97\_Alpha\_71726694\_nt5201\_Genome\_Tile|1  
TGACACTAGTGTTACTGCTAACACAGCATTTACATACCCTAAATACTATTCTACTGTATC  
>HPV97\_Alpha\_71726694\_nt5221\_Genome\_Tile|1  
ACACAGCATTTACATACCCTAAATACTATTCTACTGTATCGTCAGTCTCTTCTTATGGTA  
>HPV97\_Alpha\_71726694\_nt5241\_Genome\_Tile|1  
AAATACTATTCTACTGTATCGTCAGTCTCTTCTTATGGTAACCTTACTGTTCCCTTAACT  
>HPV97\_Alpha\_71726694\_nt5321\_Genome\_Tile|1  
ATATACAGGCCCGAGATATTGTATTACCTTCTAGTACTTCTGTATGGCCTTTTATAACACC  
>HPV97\_Alpha\_71726694\_nt5341\_Genome\_Tile|1  
TATTACCTTCTAGTACTTCTGTATGGCCTTTTATAACACCTACATCTACGTCCACGACAC  
>HPV97\_Alpha\_71726694\_nt5361\_Genome\_Tile|1  
GTATGGCCTTTTATAACACCTACATCTACGTCCACGACACACTATATAGGTATAAATGGT  
>HPV97\_Alpha\_71726694\_nt5381\_Genome\_Tile|1  
TACATCTACGTCCACGACACACTATATAGGTATAAATGGTACGCATTACTATTTATGGCC  
>HPV97\_Alpha\_71726694\_nt6961\_Genome\_Tile|1

TCTGCCCCCTACTACTTCCAAACCTGCTAAGCGTTTACGTGTCCGTCGTAAAAAATAGTAT  
>HPV97\_Alpha\_71726694\_nt7061\_Genome\_Tile|1  
GCATTTTAGCATGTATGTATGTTATTTGTATGTTGTTGTACATCCTTGTATGTGTTATGT  
>HPV97\_Alpha\_71726694\_nt7121\_Genome\_Tile|1  
GGTATTAAATAAAATATGTTTGGTAGTTTCCTGTATGGTTGCACCCTGGTGAGTAACAAA  
>HPV97\_Alpha\_71726694\_nt7141\_Genome\_Tile|1  
TGGTAGTTTCCTGTATGGTTGCACCCTGGTGAGTAACAAATAGTGTGTTGTTTCGTGGTA  
>HPV97\_Alpha\_71726694\_nt7201\_Genome\_Tile|1  
TGAGTGTATTAAATTTATTTACTTTTATATTTTACATTTTAAAGTACCATCCATTTTATAT  
>HPV97\_Alpha\_71726694\_nt7221\_Genome\_Tile|1  
CTTTTATATTTTACATTTTAAAGTACCATCCATTTTATATTACAATTCTCCATTTTAATG  
>HPV97\_Alpha\_71726694\_nt7301\_Genome\_Tile|1  
CTTGGCTTACCTTTGTACATTCTGGCACTGTTGCAAACATTACCTTTGTAGATTCTGGCA  
>HPV97\_Alpha\_71726694\_nt7341\_Genome\_Tile|1  
TACCTTTGTAGATTCTGGCACTGTTGCAAACATTAATCTTAAATACATTACTGTACTGGC  
>HPV97\_Alpha\_71726694\_nt7401\_Genome\_Tile|1  
ACTATTGCAAATGTTAATCTCACATACAATAGTCATACATATTTTACCACCTGGCACGTA  
>HPV97\_Alpha\_71726694\_nt7421\_Genome\_Tile|1  
CACATACAATAGTCATACATATTTTACCACCTGGCACGTATTTTGGCGCACACTTTGGCG  
>HPV97\_Alpha\_71726694\_nt7581\_Genome\_Tile|1  
TTTGTAGTTTGTACTTGTACTACTTGTATTATTGGCCTGTGCAACTACTTTTACATCCA  
>HPV97\_Alpha\_71726694\_nt7601\_Genome\_Tile|1  
CTACTTGTATTATTGGCCTGTGCAACTACTTTTACATCCAACAATCTGTCTACTCTTCTT  
>HPV97\_Alpha\_71726694\_nt7721\_Genome\_Tile|1  
AGTACAACCCATACTTTTCATTAATACTTTTAAACAATAATGTTATATAAAAAATGGGTGTA  
>HPVcand89\_Alpha\_22095322\_nt0041\_Genome\_Tile|1  
GCAAAGACTGCGACGTGGATTTAGAGGATCTACGGCTTACATGCATATATTGCACCAAGG  
>HPVcand89\_Alpha\_22095322\_nt0061\_Genome\_Tile|1  
TTAGAGGATCTACGGCTTACATGCATATATTGCACCAAGGAGCTTACAACATCAGAAGTG  
>HPVcand89\_Alpha\_22095322\_nt0121\_Genome\_Tile|1  
CTGTCCTTTGCACTAAAGGAAGTGGATATAGTGTGGAAGTGGCAGCTGCCCCATGGTGTA  
>HPVcand89\_Alpha\_22095322\_nt0141\_Genome\_Tile|1  
ACTGGATATAGTGTGGAAGTGGCAGCTGCCCCATGGTGTATGTGCACCGTGCTTAAGTAG  
>HPVcand89\_Alpha\_22095322\_nt0301\_Genome\_Tile|1  
TGCTATATATGCTGTAAGCCGTTAGGCAGCCAGGAAAAGGACTATATGGTGTATTTTAAC  
>HPVcand89\_Alpha\_22095322\_nt0321\_Genome\_Tile|1  
GTTAGGCAGCCAGGAAAAGGACTATATGGTGTATTTTAACGAGCGATTTTCATAAAATATC  
>HPVcand89\_Alpha\_22095322\_nt0401\_Genome\_Tile|1  
GTTGCAACTGCAGGGTAATATGCACGGCCGCACGCCGACCATCCAGGATATAGTTCTGGA  
>HPVcand89\_Alpha\_22095322\_nt0421\_Genome\_Tile|1  
TGCACGGCCGCACGCCGACCATCCAGGATATAGTTCTGGAAGAACGTCCAGAACCAATTA  
>HPVcand89\_Alpha\_22095322\_nt0441\_Genome\_Tile|1  
ATCCAGGATATAGTTCTGGAAGAACGTCCAGAACCAATTAGCCTACAATGTGAGGAAGAA  
>HPVcand89\_Alpha\_22095322\_nt0601\_Genome\_Tile|1  
GTGGTGTGTGCTATCGTGCAGTTAGGTAGTAGTATTGTCTGACGACGCACATCTAAGAC  
>HPVcand89\_Alpha\_22095322\_nt0621\_Genome\_Tile|1  
GTTAGGTTAGTAGTATTGTCTGACGACGCACATCTAAGACATCTACAACAGCTGCTGCTG  
>HPVcand89\_Alpha\_22095322\_nt1001\_Genome\_Tile|1  
TTACCTATAGCCCGGCATCCAGTACCGGCGTGCATGGGTAGATAAGGAATTAAGTCCCC  
>HPVcand89\_Alpha\_22095322\_nt1021\_Genome\_Tile|1  
AGTACCGGCGTGCATGGGTAGATAAGGAATTAAGTCCCCGGTTGGATGCCATAAACCTA  
>HPVcand89\_Alpha\_22095322\_nt1041\_Genome\_Tile|1  
AGATAAGGAATTAAGTCCCCGGTTGGATGCCATAAACCTAAACAGGGGCCACGAAAAAGC  
>HPVcand89\_Alpha\_22095322\_nt1281\_Genome\_Tile|1  
ACAGACGCAGGAGGGAACGCAAGGTGTGCTGGAGCTGCTTAAGGCGAGCAACATAAGGGC

>HPVcand89\_Alpha\_22095322\_nt1321\_Genome\_Tile|1  
AAGGCGAGCAACATAAGGGCCACCATACTGAGTAAGTTTAAGGAACATTTGGACTATCC  
>HPVcand89\_Alpha\_22095322\_nt1361\_Genome\_Tile|1  
AGGAACTATTTGGACTATCCTACTATGACCTTGTAAGGCAATTTAAAAGTGATAAGTCTA  
>HPVcand89\_Alpha\_22095322\_nt1761\_Genome\_Tile|1  
AATAGGGGAGGCAATGAAGGAAACCCAGTTTAGTCTATCAACATTAGTACAATGGGCCTA  
>HPVcand89\_Alpha\_22095322\_nt2381\_Genome\_Tile|1  
GAAACCTAACACAACATAAATGTCCACCCTTAATGATAACCACCAATGTGGACCCCTTAG  
>HPVcand89\_Alpha\_22095322\_nt2401\_Genome\_Tile|1  
TGTCCACCCTTAATGATAACCACCAATGTGGACCCCTTAGCAGATGATACATTAAAATAT  
>HPVcand89\_Alpha\_22095322\_nt2481\_Genome\_Tile|1  
GTTTAGATTTCTAAACAAATGTCCAATGAACGCAAACGGGGAGCCAGTATATACATTAAA  
>HPVcand89\_Alpha\_22095322\_nt2841\_Genome\_Tile|1  
CCATTACCATACATTTGTCATTGCAAAGTTTAAATGCCAGTGCATATAAAGATGAACCCT  
>HPVcand89\_Alpha\_22095322\_nt2961\_Genome\_Tile|1  
AAAAAGGACATACAGTAACTGTTAAATACGATGGAGAGGACCAAAAGGCCATGGAATATG  
>HPVcand89\_Alpha\_22095322\_nt2981\_Genome\_Tile|1  
GTTAAATACGATGGAGAGGACCAAAAGGCCATGGAATATGTTTCTTGGGGTGAAATATAC  
>HPVcand89\_Alpha\_22095322\_nt3001\_Genome\_Tile|1  
CCAAAAGGCCATGGAATATGTTTCTTGGGGTGAAATATACATACAATGTCCAGAAACAGA  
>HPVcand89\_Alpha\_22095322\_nt3021\_Genome\_Tile|1  
TTTCTTGGGGTGAAATATACATACAATGTCCAGAAACAGACATGTGGTACAAGGTGGCCG  
>HPVcand89\_Alpha\_22095322\_nt3261\_Genome\_Tile|1  
TACCCTCTGCTGCAGTTGGTGACCGGCTACACCACCCACCACACCCACTTCCTGCACCG  
>HPVcand89\_Alpha\_22095322\_nt3421\_Genome\_Tile|1  
ACAAAAGCACGTGGACAGTAGCCACAGGGGGCTCCACAGTAACCCTGACGGCACAGAACG  
>HPVcand89\_Alpha\_22095322\_nt3441\_Genome\_Tile|1  
GCCACAGGGGGCTCCACAGTAACCCTGACGGCACAGAACGACTCGGGATCGCGCATTTGTT  
>HPVcand89\_Alpha\_22095322\_nt3541\_Genome\_Tile|1  
CAAACATAAAATGTTTTAGATATAGATTAAAGCAAACAGTACCTGACCTATACCTACGTGC  
>HPVcand89\_Alpha\_22095322\_nt3681\_Genome\_Tile|1  
AACGGGCACAATTTCTTGACGTGTGCATATACCAAAGGGTATACAGGCTATGCAAGGTC  
>HPVcand89\_Alpha\_22095322\_nt3761\_Genome\_Tile|1  
CCACCTTACATGTAATATTTGGTACAGTGTATTGTGTATATACAATGTAAATAATGTTTG  
>HPVcand89\_Alpha\_22095322\_nt3781\_Genome\_Tile|1  
GGTACAGTGTATTGTGTATATACAATGTAAATAATGTTTGTACTGCATAGCTGAGCCTAC  
>HPVcand89\_Alpha\_22095322\_nt3801\_Genome\_Tile|1  
TACAATGTAAATAATGTTTGTACTGCATAGCTGAGCCTACCATAGTCCTGTGCCACATAT  
>HPVcand89\_Alpha\_22095322\_nt3821\_Genome\_Tile|1  
TACTGCATAGCTGAGCCTACCATAGTCCTGTGCCACATATATTGTACATTGCAATAGTAA  
>HPVcand89\_Alpha\_22095322\_nt3841\_Genome\_Tile|1  
CATAGTCCTGTGCCACATATATTGTACATTGCAATAGTAACCCTGGATATTATACTACGT  
>HPVcand89\_Alpha\_22095322\_nt3861\_Genome\_Tile|1  
ATTGTACATTGCAATAGTAACCCTGGATATTATACTACGTCTTATATGTTTGTGGAGTGA  
>HPVcand89\_Alpha\_22095322\_nt3881\_Genome\_Tile|1  
CCCTGGATATTATACTACGTCTTATATGTTTGTGGAGTGATATACTTGTGCTGCTTATTT  
>HPVcand89\_Alpha\_22095322\_nt3981\_Genome\_Tile|1  
TGTGTTGTTGGGTATTGTGTATGTAGGGTTACTACTTCTTTATGTGCAAGTATTGTGGTA  
>HPVcand89\_Alpha\_22095322\_nt4001\_Genome\_Tile|1  
ATGTAGGGTTACTACTTCTTTATGTGCAAGTATTGTGGTATATAGGACTATAACCACACA  
>HPVcand89\_Alpha\_22095322\_nt4101\_Genome\_Tile|1  
TTTATACACATGTTCCCCGTAGAGGTACGCGGTGCGGGGGGGGGGTACGACATGGTGGTA  
>HPVcand89\_Alpha\_22095322\_nt4121\_Genome\_Tile|1  
AGAGGTACGCGGTGCGGGGGGGGGGTACGACATGGTGGTATTTGACAGACATGATGTTGG  
>HPVcand89\_Alpha\_22095322\_nt4141\_Genome\_Tile|1

GGGGGTACGACATGGTGGTATTTGACAGACATGATGTTGGGTACTAGGCATATTGTTGT  
>HPVcand89\_Alpha\_22095322\_nt4241\_Genome\_Tile|1  
GCTACTACATTATTGAACATGCTTTTATAGTGCATTCCCATACCTGTATTGTTGACTACTG  
>HPVcand89\_Alpha\_22095322\_nt4261\_Genome\_Tile|1  
GCTTTTATAGTGCATTCCCATACCTGTATTGTTGACTACTGCTATAGGATTGTGTTTTATA  
>HPVcand89\_Alpha\_22095322\_nt4281\_Genome\_Tile|1  
TACCTGTATTTGGTACACTGCTATAGGATTGTGTTTTATATTTTTATATATACAATAAAT  
>HPVcand89\_Alpha\_22095322\_nt4681\_Genome\_Tile|1  
TAGCATTGTTGAGTCAGGGGCTGTCTTGCCCAATTTTACAGGCACCGATGGCTTTGAGAT  
>HPVcand89\_Alpha\_22095322\_nt4821\_Genome\_Tile|1  
ATAGCAATCCTGCATTTACCGAGCCCTCCATTATTGAGCCCCCGCAGCATGGCAGTGTTT  
>HPVcand89\_Alpha\_22095322\_nt4941\_Genome\_Tile|1  
TGAGCACATTTGCCACCTCTGGGGACGTGGACGCTGGTCCTATAAGCAGTACCCCCAGTAC  
>HPVcand89\_Alpha\_22095322\_nt5321\_Genome\_Tile|1  
TACCATGATGTAAGTCCCATTTCGGCTGCAGAATCCATTGAGATGCAGCCATTATTACCT  
>HPVcand89\_Alpha\_22095322\_nt5341\_Genome\_Tile|1  
TTCGGCTGCAGAATCCATTGAGATGCAGCCATTATTACCTTCCCCTGACCTTACACAGCC  
>HPVcand89\_Alpha\_22095322\_nt5361\_Genome\_Tile|1  
AGATGCAGCCATTATTACCTTCCCCTGACCTTACACAGCCTGTGTATGATATATATGCTG  
>HPVcand89\_Alpha\_22095322\_nt5521\_Genome\_Tile|1  
TGTATCGTCTCAATACACAAATGTTACTGTTCCTTTGTCTCAGGGGTTTGACGTTCCCTGC  
>HPVcand89\_Alpha\_22095322\_nt5541\_Genome\_Tile|1  
ATGTTACTGTTCCTTTGTCTCAGGGGTTTGACGTTCCCTGCTGTTACAGGGCCTGACATAG  
>HPVcand89\_Alpha\_22095322\_nt5561\_Genome\_Tile|1  
CAGGGGTTTGACGTTCCCTGCTGTTACAGGGCCTGACATAGCATTTCCCCTGCCCCCTAGT  
>HPVcand89\_Alpha\_22095322\_nt5581\_Genome\_Tile|1  
TGTTACAGGGCCTGACATAGCATTTCCCCTGCCCCCTAGTGTCCCCCATATTCCCCTC  
>HPVcand89\_Alpha\_22095322\_nt5641\_Genome\_Tile|1  
ATATACCCTTGGCCCCCTCCACAGGCTATATATATTACGGTACGGATTTTATTTAGTAC  
>HPVcand89\_Alpha\_22095322\_nt5881\_Genome\_Tile|1  
ATTACAGTTGGCCACCCTTATTATACTGTACAGGTCAATGGTGCTAACAAAAAGGCCAAC  
>HPVcand89\_Alpha\_22095322\_nt6121\_Genome\_Tile|1  
TTATACAACCGTTTGGATGACACTGAAAATGCTTCCTTATTGGTTGCTGCAGATGTTGAC  
>HPVcand89\_Alpha\_22095322\_nt6141\_Genome\_Tile|1  
CACTGAAAATGCTTCCTTATTGGTTGCTGCAGATGTTGACAGTAGGGATAATATATCTGT  
>HPVcand89\_Alpha\_22095322\_nt6281\_Genome\_Tile|1  
CTAGTGTTGTGCCTCAGCAGGGGATTGCCACCTTTGCAGTTGCTAAATACTACTATTG  
>HPVcand89\_Alpha\_22095322\_nt6541\_Genome\_Tile|1  
AGGCAGGGTGTTATGGGTGAGGACCTGCCAAAAACCTTGTTATATGCCTGGGTCTGCTGCT  
>HPVcand89\_Alpha\_22095322\_nt6581\_Genome\_Tile|1  
ATATGCCTGGGTCTGCTGCTAATAACAGAAATACACTTACTAGCTATGTATATGCCCCAA  
>HPVcand89\_Alpha\_22095322\_nt6601\_Genome\_Tile|1  
AATAACAGAAATACACTTACTAGCTATGTATATGCCCCAACGCCAGTGGGTCTATGGTT  
>HPVcand89\_Alpha\_22095322\_nt6781\_Genome\_Tile|1  
AACCTTACCATTTGTGCTGCTTCCAGTCTGGCACAGAATACAGTTCTACACGCTTTAAG  
>HPVcand89\_Alpha\_22095322\_nt6801\_Genome\_Tile|1  
TTCCCAGTCTGGCACAGAATACAGTTCTACACGCTTTAAGGAATATTTAAGACACACTGA  
>HPVcand89\_Alpha\_22095322\_nt6861\_Genome\_Tile|1  
GGAATATGACCTACAGTTTATATTCCAATATGTAAGATACACCTAACGCCTGAGATAAT  
>HPVcand89\_Alpha\_22095322\_nt6881\_Genome\_Tile|1  
TATTCCAACCTATGTAAGATACACCTAACGCCTGAGATAATGTCCTATTTACACAATATGA  
>HPVcand89\_Alpha\_22095322\_nt7261\_Genome\_Tile|1  
TAATTTATACTCTGTGTGTTGTGTGTGCTGTATTTGGTTTTGTATATTATGTTATGTGGT  
>HPVcand89\_Alpha\_22095322\_nt7321\_Genome\_Tile|1  
GCCCTCTGTGTGTGTATGTATTGTATAACTTATGTATGTATCCCTACTGTTGTGTAGTGT

>HPVcand89\_Alpha\_22095322\_nt7401\_Genome\_Tile|1  
TGTAGTGTGTGTCCTGTATGTAAACCCCTATGTACTGTGTGTCCTGTATGTAAACCCCTATT  
>HPVcand89\_Alpha\_22095322\_nt7521\_Genome\_Tile|1  
ATGTGTCACTGTGGCCCTGTGTCCAGCTGCGCCCTATGAGATATGTATTCGGCCATTTCC  
>HPVcand89\_Alpha\_22095322\_nt7541\_Genome\_Tile|1  
GTCCAGCTGCGCCCTATGAGATATGTATTCGGCCATTTCTTTCCACCCAGCGTCCATT  
>HPVcand89\_Alpha\_22095322\_nt7621\_Genome\_Tile|1  
CGGTCTCCCGCGTTTTTGTGTTTTGTTATGGCGCCATGCCACTTTACACAAAGACTTGTA  
>HPVcand89\_Alpha\_22095322\_nt7641\_Genome\_Tile|1  
TTTGTATTGGCGCCATGCCACTTTACACAAAGACTTGTAATCTTTTATACTTCCTGCGTA  
>HPVcand89\_Alpha\_22095322\_nt7721\_Genome\_Tile|1  
CTGGGAGTGCTGACATTTATTTGGCTACAAATACATTGTGCTGTGCACAATTTATGTAC  
>HPVcand89\_Alpha\_22095322\_nt7741\_Genome\_Tile|1  
TTTGGCTACAAATACATTGTGCTGTGCACAATTTATGTACTTTTCACTCATTGCTGCAA  
>HPVcand89\_Alpha\_22095322\_nt7881\_Genome\_Tile|1  
CAACTATGTGTCTTGTAAACCTTGTTTTATTGCTTTTAAACATGTTTCATGCCATACCCA  
>HPVcand89\_Alpha\_22095322\_nt7921\_Genome\_Tile|1  
CATGTTTCATGCCATACCCATACCGGTCGCTCCCTATGTGTCATTCTTTACTTATTATTA  
>HPVcand89\_Alpha\_22095322\_nt7941\_Genome\_Tile|1  
TACCGGTCGCTCCCTATGTGTCATTCTTTACTTATTATTATATATTACAATCATAAGACT  
>HPV13\_Alpha\_85827580\_nt0241\_Genome\_Tile|1  
TCAGTATAAGAGTTTATATATAGTGTGGCGAGGATCGTTTCCATTGCGGCTTGTGCATG  
>HPV13\_Alpha\_85827580\_nt0281\_Genome\_Tile|1  
CCATTTGCGGCTTGTGCATGCTGCTTAGAAATACAAGGAAAGATTAACCAGTTTAGGCAT  
>HPV13\_Alpha\_85827580\_nt0441\_Genome\_Tile|1  
AAGTGGAGAAACTAAGACATATTTTGCGAAGGCACGATTTATTAAATTAACAGCAGTT  
>HPV13\_Alpha\_85827580\_nt0661\_Genome\_Tile|1  
CAACATAGCACACTATTACAATGCTACCAAATACTAACGTCCTGTAGTAAATGTTGTAGC  
>HPV13\_Alpha\_85827580\_nt0741\_Genome\_Tile|1  
GTGTACAGGACCTGACATTCACGACCTACACGACCTACTGCTGGGCACGCTGAATATAGT  
>HPV13\_Alpha\_85827580\_nt2081\_Genome\_Tile|1  
AAAAATGTCTATGAAACAATGGATAACATATAGAAGTAAAAAATAGAGGAAGCAGGAAA  
>HPV13\_Alpha\_85827580\_nt2521\_Genome\_Tile|1  
CATCTAATGTAGACATTACCAAAGATGACAAATATAAATATTTGTATAGTAGAGTAACAA  
>HPV13\_Alpha\_85827580\_nt3101\_Genome\_Tile|1  
ACAATAGAATGGATTATGTGTGCTGGACATACATATATGTGTTTGACACAGATAAATGGA  
>HPV13\_Alpha\_85827580\_nt3161\_Genome\_Tile|1  
CAAAGGTGAAAAGGAATGGTAGATTATAAAGGGTTGTACTACATACATGGAAATTTGAAA  
>HPV13\_Alpha\_85827580\_nt3181\_Genome\_Tile|1  
GATTATAAAGGGTTGTACTACATACATGGAAATTTGAAAACATATTATATAGAGTTTGAA  
>HPV13\_Alpha\_85827580\_nt3721\_Genome\_Tile|1  
CCTAATAATTCACAAAACATGCACTGGTAACCTTAACCTATGTAAATGAACAACAAAGA  
>HPV13\_Alpha\_85827580\_nt3761\_Genome\_Tile|1  
ATGTAAATGAACAACAAAGACAAGACTTTTTAAACACTGTAAAAATACCTGCAACCATAA  
>HPV13\_Alpha\_85827580\_nt3781\_Genome\_Tile|1  
CAAGACTTTTTAAACACTGTAAAAATACCTGCAACCATAACACATAAACTAGGTTTTATG  
>HPV13\_Alpha\_85827580\_nt3801\_Genome\_Tile|1  
AAAAATACCTGCAACCATAACACATAAACTAGGTTTTATGTTCATTGCAATTGTTGTAACA  
>HPV13\_Alpha\_85827580\_nt3821\_Genome\_Tile|1  
CACATAAACTAGGTTTTATGTTCATTGCAATTGTTGTAACAGCATATATTGTATGTAAATA  
>HPV13\_Alpha\_85827580\_nt3861\_Genome\_Tile|1  
GCATATATTGTATGTAAATATTTGTTGTGTGTGTATATATTGTACATGGAATTTATAC  
>HPV13\_Alpha\_85827580\_nt3921\_Genome\_Tile|1  
CTGTGGATGTTACTACACAGGAAACCAGCAAGTCATTACTGCCACTTGTAATTGCACTTA  
>HPV13\_Alpha\_85827580\_nt3961\_Genome\_Tile|1

GCCACTTGTAATTGCACTTACAGTGTGTGTAGTTAGCATTATAACAATATTGTGGATATC  
>HPV13\_Alpha\_85827580\_nt3981\_Genome\_Tile|1  
CAGTGTGTGTAGTTAGCATTATAACAATATTGTGGATATCAGAGTTTTTGGTGTACACAA  
>HPV13\_Alpha\_85827580\_nt4001\_Genome\_Tile|1  
ATAACAATATTGTGGATATCAGAGTTTTTGGTGTACACAAACGTTTTAGTACTAACATTA  
>HPV13\_Alpha\_85827580\_nt4021\_Genome\_Tile|1  
AGAGTTTTTGGTGTACACAAACGTTTTAGTACTAACATTAATTTTATATATACTTTTGTG  
>HPV13\_Alpha\_85827580\_nt4121\_Genome\_Tile|1  
CTGTCTCTTTGCTTTCTTCCTGCGTTGTGTGTACACCAATATATTTTACAAACACAAGAA  
>HPV13\_Alpha\_85827580\_nt4221\_Genome\_Tile|1  
ACACATGGTTGCTATTATGGTTAATTTTATCATTTATTGTAGCCATTCTAGGGTTACTGT  
>HPV13\_Alpha\_85827580\_nt4241\_Genome\_Tile|1  
TTAATTTTATCATTTATTGTAGCCATTCTAGGGTTACTGTTGCTGTATATAAGAACTGGA  
>HPV13\_Alpha\_85827580\_nt4281\_Genome\_Tile|1  
TGCTGTATATAAGAACTGGACATATGCATTGCCAGTGTGGAGTAAATAAGTGGTTTTAT  
>HPV13\_Alpha\_85827580\_nt4301\_Genome\_Tile|1  
CATATGCATTGCCAGTGTGGAGTAAATAAGTGGTTTTATATTTTGTGTGTATTCATTTA  
>HPV13\_Alpha\_85827580\_nt4561\_Genome\_Tile|1  
CGGTAGGACTGGCTATGTACCAGTAGGATCCACCCACGCCCTGCCATATCATCTGGGCC  
>HPV13\_Alpha\_85827580\_nt4861\_Genome\_Tile|1  
TATTACACAATCTCAACCTTCTATTGAAAGTGGTGCACACGTGTTTATATCGCCATCTAC  
>HPV13\_Alpha\_85827580\_nt4881\_Genome\_Tile|1  
CTATTGAAAGTGGTGCACACGTGTTTATATCGCCATCTACTATTTCCCCCTCATTCTACAG  
>HPV13\_Alpha\_85827580\_nt4901\_Genome\_Tile|1  
GTGTTTATATCGCCATCTACTATTTCCCCCTCATTCTACAGAAGACATTCCCTTTAGATACA  
>HPV13\_Alpha\_85827580\_nt4921\_Genome\_Tile|1  
TATTTCCCCCTCATTCTACAGAAGACATTCCCTTTAGATACATTTATTGTATCTTCCTCAGA  
>HPV13\_Alpha\_85827580\_nt5121\_Genome\_Tile|1  
ACCCAACATATGAAGGTGAAGATATAAGTTTGCAGTTTGCCACAATACCATTTCATGAAC  
>HPV13\_Alpha\_85827580\_nt5141\_Genome\_Tile|1  
GATATAAGTTTGCAGTTTGCCACAATACCATTTCATGAACCCCCTGATGAGGCATTTATG  
>HPV13\_Alpha\_85827580\_nt5221\_Genome\_Tile|1  
GCCAGCCATAACATCACGGCGTGGTCTTGTAGGTTTAGTTCGAATTGGTCAGAGGGGGTC  
>HPV13\_Alpha\_85827580\_nt5281\_Genome\_Tile|1  
TATGTATACTCGAAGCGGCAAGCATATAGGTGGAAGGGTCCATTTCTTTAAGGATATTTT  
>HPV13\_Alpha\_85827580\_nt5581\_Genome\_Tile|1  
TGACATAACATTCCTCAACTGCACCTACAGTAACACCTTATAATCCTGTTACGCCTATTTT  
>HPV13\_Alpha\_85827580\_nt5881\_Genome\_Tile|1  
CTTATTTTCTTATTAAGAAACAAAACAAAACCTGTTGTCCCTAAGGTATCTGGTTATCAGT  
>HPV13\_Alpha\_85827580\_nt5901\_Genome\_Tile|1  
CAAAACAAAACCTGTTGTCCCTAAGGTATCTGGTTATCAGTTTAGGGTATTTAAAGTTGTA  
>HPV13\_Alpha\_85827580\_nt6501\_Genome\_Tile|1  
GCAAGGCATTTCTTTAACAGGGCAGGCTCTGTTGGTGAACATAATCCCAGCAGAATTATAT  
>HPV13\_Alpha\_85827580\_nt6521\_Genome\_Tile|1  
GGCAGGCTCTGTTGGTGAACATAATCCCAGCAGAATTATATGTTAAGGGTAGTAATACACT  
>HPV13\_Alpha\_85827580\_nt6541\_Genome\_Tile|1  
TAATCCCAGCAGAATTATATGTTAAGGGTAGTAATACACTTTCTAATAGTATTTACTATA  
>HPV13\_Alpha\_85827580\_nt6561\_Genome\_Tile|1  
GTTAAGGGTAGTAATACACTTTCTAATAGTATTTACTATAAATACTCCCAGTGGCTCTCTT  
>HPV13\_Alpha\_85827580\_nt6741\_Genome\_Tile|1  
ACTAACATGACTGTGTGTGCAGCCACTACATCATCTCTTTTCAGACACATATAAGGCCACA  
>HPV13\_Alpha\_85827580\_nt6761\_Genome\_Tile|1  
AGCCACTACATCATCTCTTTTCAGACACATATAAGGCCACAGAATATAAACAGTACATGCG  
>HPV13\_Alpha\_85827580\_nt6941\_Genome\_Tile|1  
GCTATCTCCCCCTCCTAATGGAACATTGGAAGACACATATAGATATGTACAATCTCAGGC

>HPV13\_Alpha\_85827580\_nt7001\_Genome\_Tile|1  
CATAACGTGTCAAAAGCCTACACCTGATAAAGAAAAACAGGATCCGTATGCGGGTCTTAG  
>HPV13\_Alpha\_85827580\_nt7141\_Genome\_Tile|1  
CAGGCGTTCAGTCTAGGTCACCTATTCGTGTAGGTAGAAAACGTGCTGCATCTACATCTA  
>HPV13\_Alpha\_85827580\_nt7161\_Genome\_Tile|1  
CCTATTCGTGTAGGTAGAAAACGTGCTGCATCTACATCTACTGCCACACCTACTACACGT  
>HPV13\_Alpha\_85827580\_nt7181\_Genome\_Tile|1  
ACGTGCTGCATCTACATCTACTGCCACACCTACTACACGTAAAAAAGCTAAAAGGAAATA  
>HPV13\_Alpha\_85827580\_nt7241\_Genome\_Tile|1  
ATAGTTTGTATTATGATTGTGTATGTATGTCACGTTTGTGTGTACTGTATATATGTTGTGT  
>HPV13\_Alpha\_85827580\_nt7281\_Genome\_Tile|1  
GTACTGTATATATGTTGTGTACTGTATGTGTAATGTTGTATGTATGTGCATGTTACTTAT  
>HPV13\_Alpha\_85827580\_nt7321\_Genome\_Tile|1  
TGTATGTGCATGTTACTTATTAAAGAATGTGTGTGTGTGTTTGTATGCAATAAATTTAAT  
>HPV13\_Alpha\_85827580\_nt7401\_Genome\_Tile|1  
CTATGAGTAAAGTGGTATGTTGTGTCTCGTGTGTTGTTTTGTATACTATACTATAACAGTA  
>HPV13\_Alpha\_85827580\_nt7421\_Genome\_Tile|1  
GTGTCTCGTGTGTTGTTTTGTATACTATACTATAACAGTAGTGCAACCATTTTGTAACCT  
>HPV13\_Alpha\_85827580\_nt7541\_Genome\_Tile|1  
ACCGATTTGTTGCAGCAGCTGTTTATATAATCTTACCTACCGCTGCCAAAATTATCCA  
>HPV13\_Alpha\_85827580\_nt7601\_Genome\_Tile|1  
CCGCTTGCCAAAATCACCCACACACCTGGCGTTGCTAGGGCGCGGTTATATATGTTTACT  
>HPV13\_Alpha\_85827580\_nt7621\_Genome\_Tile|1  
CACACCTGGCGTTGCTAGGGCGCGGTTATATATGTTTACTAAATCTTACTAATCTTTCTA  
>HPV13\_Alpha\_85827580\_nt7641\_Genome\_Tile|1  
CGCGGTTATATATGTTTACTAAATCTTACTAATCTTTCTATCACTCATTTTACCTTTATA  
>HPV13\_Alpha\_85827580\_nt7661\_Genome\_Tile|1  
AAATCTTACTAATCTTTCTATCACTCATTTTACCTTTATAACAATACTTTTGCTTTTCAA  
>HPV13\_Alpha\_85827580\_nt7681\_Genome\_Tile|1  
TCACTCATTTTACCTTTATAACAATACTTTTGCTTTTCAAGTACATTTTCTACTTACTA  
>HPV13\_Alpha\_85827580\_nt7701\_Genome\_Tile|1  
ACAATACTTTTGCTTTTCAAGTACATTTTCTACTTACTAGCCAATGCCTGAAAGGTTTT  
>HPV13\_Alpha\_85827580\_nt7721\_Genome\_Tile|1  
GTACATTTTCTACTTACTAGCCAATGCCTGAAAGGTTTTTTGGCTACCAGCACTACATT  
>HPV102\_Alpha\_71726718\_nt2421\_Genome\_Tile|1  
TCCGTTGGCAGACGAGTCACTAAAATATTTACGTAGCAGAATAACAGTGTTTAAGTTTAT  
>HPV102\_Alpha\_71726718\_nt2441\_Genome\_Tile|1  
TAAATATTTACGTAGCAGAATAACAGTGTTTAAAGTTTATGAATAAATGTCCAGTAACAG  
>HPV102\_Alpha\_71726718\_nt3021\_Genome\_Tile|1  
TATATGTAAATAAGGAGGACACAGACACATGGTATAAAGTGCCAGGCCGCATAGATTATG  
>HPV102\_Alpha\_71726718\_nt3401\_Genome\_Tile|1  
ACCGAAAAACAACATCAAAAGCGGCTGGACACTAGTACCCACGGATTCTACGGTGACACT  
>HPV102\_Alpha\_71726718\_nt3441\_Genome\_Tile|1  
ACGGATTCTACGGTGACACTGAGTGCCCCAAACGCCCAAGGGACAACAGTGACAGTAACA  
>HPV102\_Alpha\_71726718\_nt3461\_Genome\_Tile|1  
GAGTGCCCCAAACGCCCAAGGGACAACAGTGACAGTAACAATAACCTGTAATCCACTTA  
>HPV102\_Alpha\_71726718\_nt3621\_Genome\_Tile|1  
GGGAGACAGCCACTAAAGCAACCTTTGTTACCTTGCGGTATAGCAGTGTAGAACAACGTA  
>HPV102\_Alpha\_71726718\_nt3641\_Genome\_Tile|1  
ACCTTTGTTACCTTGCGGTATAGCAGTGTAGAACAACGTAACCTGTTTTTAAGTAGGGTA  
>HPV102\_Alpha\_71726718\_nt3781\_Genome\_Tile|1  
TATATATGCTGTAATACTTACATTGTATAGGTGTATACAAATTGTGTTTGCAGTACACTG  
>HPV102\_Alpha\_71726718\_nt3801\_Genome\_Tile|1  
CATTGTATAGGTGTATACAAATTGTGTTTGCAGTACACTGAGCCACATATTACCAATCCA  
>HPV102\_Alpha\_71726718\_nt3821\_Genome\_Tile|1

ATTGTGTTTGCAGTACACTGAGCCACATATTACCAATCCACCCCCACACCTGGTAAAGTG  
>HPV102\_Alpha\_71726718\_nt3841\_Genome\_Tile|1  
AGCCACATATTACCAATCCACCCCCACACCTGGTAAAGTGTGCACACAGTTACAACCCTG  
>HPV102\_Alpha\_71726718\_nt3881\_Genome\_Tile|1  
TGCACACAGTTACAACCCTGGATCTTGTTTATGCTTTATATGTTGGTGGTGTGACATAC  
>HPV102\_Alpha\_71726718\_nt3901\_Genome\_Tile|1  
GATCTTGTTTTATGCTTTATATGTTGGTGGTGTGACATACTTGCTTCTTGTTTGCTTT  
>HPV102\_Alpha\_71726718\_nt3961\_Genome\_Tile|1  
TGGCTTTTCGTACCTTCTCCCTGTGCTGCCCTTGTTGTGTTTATGTGCATTATATACCTA  
>HPV102\_Alpha\_71726718\_nt3981\_Genome\_Tile|1  
CTGTGCTGCCCTTGTTGTGTTTATGTGCATTATATACCTAGGGTTGTTTTAGTGTACCT  
>HPV102\_Alpha\_71726718\_nt4001\_Genome\_Tile|1  
TTATGTGCATTATATACCTAGGGTTGTTTTAGTGTACCTTCAGGTACTGTGGTCCAGTG  
>HPV102\_Alpha\_71726718\_nt4141\_Genome\_Tile|1  
GTATCCATTGGAAACACGACGGGGGGGCCGTCCTATGATGTGATTGTTTTGGGCAAGC  
>HPV102\_Alpha\_71726718\_nt4181\_Genome\_Tile|1  
GTGATTGTTTTGGGCAAGCTGATACTGGATTACTGTTAATAATTTAATTTGATCATC  
>HPV102\_Alpha\_71726718\_nt4221\_Genome\_Tile|1  
TAATTTTAATTTTGATCATCATATAATTATTATCCTGCTGTATATGAGGCTTATGCACATGT  
>HPV102\_Alpha\_71726718\_nt4241\_Genome\_Tile|1  
ATAATTATTATCCTGCTGTATATGAGGCTTATGCACATGTAGACTCCTTACTGTGTTCCCT  
>HPV102\_Alpha\_71726718\_nt4261\_Genome\_Tile|1  
TATGAGGCTTATGCACATGTAGACTCCTTACTGTGTTCCCTTTGTATTCCCATACATTTT  
>HPV102\_Alpha\_71726718\_nt4321\_Genome\_Tile|1  
TGATATTACTTTTTGTATTGTTTTATACACAGCACTTAATAAATACATTTAATTACACAA  
>HPV102\_Alpha\_71726718\_nt4341\_Genome\_Tile|1  
TTTTATACACAGCACTTAATAAATACATTTAATTACACAATGTCCACTGTGGTTAGGCGA  
>HPV102\_Alpha\_71726718\_nt4361\_Genome\_Tile|1  
AAATACATTTAATTACACAATGTCCACTGTGGTTAGGCGACGCAAACGAGCGTCCGCAAC  
>HPV102\_Alpha\_71726718\_nt4841\_Genome\_Tile|1  
CACTAGCTTTACTAATCCCTTGTTTACAGAACCTTCTATAATTGAGGCTCCACAACATGG  
>HPV102\_Alpha\_71726718\_nt5041\_Genome\_Tile|1  
GTGTTGCAGGCCCTCGCATTGGCCTTACAGTCGTGCGACAGACCAAGTTAAAGTATCTG  
>HPV102\_Alpha\_71726718\_nt5341\_Genome\_Tile|1  
TGCATTTTTTACCATGATATTAGTCCTATTGCAGGTGCAGAGCATATTGAACTTCGCCCCCT  
>HPV102\_Alpha\_71726718\_nt5361\_Genome\_Tile|1  
AGTCCTATTGCAGGTGCAGAGCATATTGAACTTCGCCCCCTGCAGCCTTCCATTGCTACT  
>HPV102\_Alpha\_71726718\_nt5381\_Genome\_Tile|1  
GCATATTGAACTTCGCCCCCTGCAGCCTTCCATTGCTACTGCCCCAGGGGACTCCTTATA  
>HPV102\_Alpha\_71726718\_nt5441\_Genome\_Tile|1  
TGATATTTATGCTGATAATGGCCACTTGGACTCCTTGGCGTCTCCACATGTTTCATATAC  
>HPV102\_Alpha\_71726718\_nt5461\_Genome\_Tile|1  
GCCACTTGGACTCCTTGGCGTCTCCACATGTTTCATATACTTCTTCCACGTCTGTTCCCTT  
>HPV102\_Alpha\_71726718\_nt5501\_Genome\_Tile|1  
TTCTTCCACGTCTGTTCCCTTTGCAATCTACAAATATTTTCAGCTACATCTGTGGTCTCTGC  
>HPV102\_Alpha\_71726718\_nt5561\_Genome\_Tile|1  
GCGGTATGACAATGTACAGTACCACTCTCTTCTGGGTTTGATTGCTGCTGCATATACAGG  
>HPV102\_Alpha\_71726718\_nt5581\_Genome\_Tile|1  
TACCACTCTCTCTGGGTTTGATTGCTGCTGATATACAGGCCCTGACATTCCAATTGCCA  
>HPV102\_Alpha\_71726718\_nt5621\_Genome\_Tile|1  
CCCTGACATTCCAATTGCCACTCTACTACCAGTGTGCTGCATGTTTCCCAGTCCTCTAA  
>HPV102\_Alpha\_71726718\_nt5641\_Genome\_Tile|1  
CTCCTACTACCAGTGTGCTGCATGTTTCCCAGTCCTCTAATGTTTCCCTTCCCAATCTGTGT  
>HPV102\_Alpha\_71726718\_nt5661\_Genome\_Tile|1  
CATGTTTCCCAGTCCTCTAATGTTCCCTTCCCAATCTGTGTTTGTGGATGGTACAGACTAT



>HPV102\_Alpha\_71726718\_nt5681\_Genome\_Tile|1  
TGTTCCCTCCCAATCTGTGTTTGTGGATGGTACAGACTATTTTTTTATTGCCTAATTACTT  
>HPV102\_Alpha\_71726718\_nt6181\_Genome\_Tile|1  
ACCCCATTAATTGCTGCAGCAGACGCCGATAGACGGGACAATGTTTCTGTAGATTACAAA  
>HPV102\_Alpha\_71726718\_nt6221\_Genome\_Tile|1  
ATGTTTCTGTAGATTACAAACAAACCCAACTACTTATTATTGGGTGTAAACCCCTATTG  
>HPV102\_Alpha\_71726718\_nt6581\_Genome\_Tile|1  
CCATGGGCGAGGAACCTCCCTGCCTCCTATTACATACCTGGCACCTCTGGAAATAATAGAC  
>HPV102\_Alpha\_71726718\_nt6601\_Genome\_Tile|1  
GCCTCCTATTACATACCTGGCACCTCTGGAAATAATAGACAAACTCCTACCAGTTATGTA  
>HPV102\_Alpha\_71726718\_nt7301\_Genome\_Tile|1  
ATACTTATGTGTTGTACGTGTGTGTTGTGTATGTGTGTGTATACATATGTTGCCTATGTG  
>HPV102\_Alpha\_71726718\_nt7341\_Genome\_Tile|1  
ATACATATGTTGCCTATGTGTTTCGTGTATGTATGCATGTTTGTGTTTGTACATGTTTGTGT  
>HPV102\_Alpha\_71726718\_nt7361\_Genome\_Tile|1  
TTCGTGTATGTATGCATGTTTGTGTTTGTACATGTTTGTGTGTTCTATGTGTATGTATTTG  
>HPV102\_Alpha\_71726718\_nt7501\_Genome\_Tile|1  
CTCCACACGTCCTGCACCGCCTTACAGTTCCTGACCCCTTATGTACCAGTTCCTTTTGTG  
>HPV102\_Alpha\_71726718\_nt7641\_Genome\_Tile|1  
CAGTGGCATGCTGCCACAACACACAATAAGTAAGTAATCCTGTCTTACGCATATCCTGCAT  
>HPV102\_Alpha\_71726718\_nt7661\_Genome\_Tile|1  
ACACAATAGTAAGTAATCCTGTCTTACGCATATCCTGCATACATTGTGCCAATGTTCCAC  
>HPV102\_Alpha\_71726718\_nt7741\_Genome\_Tile|1  
TTGTTGGCTGCACAACGTGGTTGCCAGACAATATTTATGTTTTACTCATACTCATCCTGC  
>HPV106\_Alpha\_71726710\_nt0001\_Genome\_Tile|1  
ATGGGTACATATAAAAGAGATATGTTGCTTCAGCACAAAATAGCCATGACCAACGGAGAC  
>HPV106\_Alpha\_71726710\_nt0021\_Genome\_Tile|1  
TATGTTGCTTCAGCACAAAATAGCCATGACCAACGGAGACTGCTGTCCAAAGAATATCTT  
>HPV106\_Alpha\_71726710\_nt0041\_Genome\_Tile|1  
TAGCCATGACCAACGGAGACTGCTGTCCAAAGAATATCTTCCTATTGTGCAAAGCCTATC  
>HPV106\_Alpha\_71726710\_nt2341\_Genome\_Tile|1  
TTACATAGATACATACCTACGAAACGCGCTGGACGGAAACCAGGTATGCATAGACAGAAA  
>HPV106\_Alpha\_71726710\_nt3561\_Genome\_Tile|1  
GATCCAAATAAGTTAAAGTGTTTAAGATATAGACTAAAAAAGCATAACCTGTATTATTT  
>HPV106\_Alpha\_71726710\_nt3681\_Genome\_Tile|1  
GCCTTTGTAACATTGTGGCATGATAGTGTAGAGCAAAGAGCAAAGTTCTTAGCTACGGTG  
>HPV106\_Alpha\_71726710\_nt3701\_Genome\_Tile|1  
TGATAGTGTAGAGCAAAGAGCAAAGTTCTTAGCTACGGTGACTCTGCCTAAGGACATTGT  
>HPV106\_Alpha\_71726710\_nt3721\_Genome\_Tile|1  
CAAAGTTCTTAGCTACGGTGACTCTGCCTAAGGACATTGTGGCTGTACCTGGGTACATGA  
>HPV106\_Alpha\_71726710\_nt3761\_Genome\_Tile|1  
GGCTGTACCTGGGTACATGACTATGTTTGCATAATAGTGGCCTGTGTATATTGTATACTT  
>HPV106\_Alpha\_71726710\_nt3801\_Genome\_Tile|1  
CCTGTGTATATTGTATACTTGTATATTTGTATACCCATTGTACAGTGCAGAACATTAAGG  
>HPV106\_Alpha\_71726710\_nt3841\_Genome\_Tile|1  
TACAGTGCAGAACATTAAGGGCACGTAGGCACGTGTGTATACTACACCCTGGAGATTTTT  
>HPV106\_Alpha\_71726710\_nt3861\_Genome\_Tile|1  
GCACGTAGGCACGTGTGTATACTACACCCTGGAGATTTTTATTTGCTGGCTATCTGTTTG  
>HPV106\_Alpha\_71726710\_nt3901\_Genome\_Tile|1  
ATTTGCTGGCTATCTGTTTGGACACACCTGCTGCTATTGCTTATTTGTTTCTGGCTTTCT  
>HPV106\_Alpha\_71726710\_nt3941\_Genome\_Tile|1  
TTATTTGTTTCTGGCTTTCTATGCTGTCTGCTTTACTGCATTTCTTGTTTTTTTTTTGC  
>HPV106\_Alpha\_71726710\_nt3961\_Genome\_Tile|1  
ATGCTGTCTGCTTTACTGCATTTCTGTTTTTTTTTTTGCTGTGTATATAGCCCTTCTAA  
>HPV106\_Alpha\_71726710\_nt4101\_Genome\_Tile|1

TATATTCCCTGTGTGTCATAGTGTGCAACTATGTATCCTGTAGTGGTGCGTGATAAGGGG  
>HPV106\_Alpha\_71726710\_nt4121\_Genome\_Tile|1  
GTGTGCAACTATGTATCCTGTAGTGGTGCGTGATAAGGGGGGTGATACAGAATATCCTGC  
>HPV106\_Alpha\_71726710\_nt4141\_Genome\_Tile|1  
TAGTGGTGCGTGATAAGGGGGGTGATACAGAATATCCTGCTGTACTGTGGACACCCCAAG  
>HPV106\_Alpha\_71726710\_nt4161\_Genome\_Tile|1  
GGTGATACAGAATATCCTGCTGTACTGTGGACACCCCAAGATGACAAACTGTTGTTATTG  
>HPV106\_Alpha\_71726710\_nt4181\_Genome\_Tile|1  
TGTACTGTGGACACCCCAAGATGACAAACTGTTGTTATTGCTGCTGGTGTAGTTTGTCT  
>HPV106\_Alpha\_71726710\_nt4241\_Genome\_Tile|1  
TTTGGTGTTTTTTAGTTACCTTCGTTTGTTCAGTAGTTTTTACCTTTTGTATGTACATG  
>HPV106\_Alpha\_71726710\_nt4261\_Genome\_Tile|1  
TTCGTTTGTTCAGTAGTTTTTACCTTTTGTATGTACATGTACTAGGGTGGGTTTTATAT  
>HPV106\_Alpha\_71726710\_nt4281\_Genome\_Tile|1  
TTACCTTTTGTATGTACATGTACTAGGGTGGGTTTTATATTATTGGGTGTTGTGGGTTAT  
>HPV106\_Alpha\_71726710\_nt4301\_Genome\_Tile|1  
TACTAGGGTGGGTTTTATATTATTGGGTGTTGTGGGTTATATTACATATTTTGTGGTTT  
>HPV106\_Alpha\_71726710\_nt4681\_Genome\_Tile|1  
CAATTGGGGCGTCTGAACCGTCCATTGTACACCTTAGTGGAGGATTCCAGTATTGTTGCCT  
>HPV106\_Alpha\_71726710\_nt5361\_Genome\_Tile|1  
CATGATATAAGTCCAATTACTCCTGCTGAAGAGTTAGAAATGCAACCTCTGGTGTCTGAC  
>HPV106\_Alpha\_71726710\_nt5441\_Genome\_Tile|1  
CTTATATGATATTTATGCTGACACCGAGACGCCTGGGTCGCGTCAGGGCACCTTAGCTTC  
>HPV106\_Alpha\_71726710\_nt5461\_Genome\_Tile|1  
ACACCGAGACGCCTGGGTCGCGTCAGGGCACCTTAGCTTCTATACACACATCCACACCTT  
>HPV106\_Alpha\_71726710\_nt5501\_Genome\_Tile|1  
TATACACACATCCACACCTTTGCAGGCGCCTTCATTGGCTGCATCATCCACTGTCTCCAC  
>HPV106\_Alpha\_71726710\_nt5541\_Genome\_Tile|1  
GCATCATCCACTGTCTCCACAGTATCGCACACTACTGTTCCCCTGTCTACAAGCTTTGAT  
>HPV106\_Alpha\_71726710\_nt5581\_Genome\_Tile|1  
CCCTGTCTACAAGCTTTGATGTCCCTGTTTTAGTGGCCCTGACAGTGCTCTTCCCGATT  
>HPV106\_Alpha\_71726710\_nt5681\_Genome\_Tile|1  
CCCCACAGGCGATGTGCTTGTGCACGGGTCTACATATTATTTATTGCCCTCATATGTGTT  
>HPV106\_Alpha\_71726710\_nt5901\_Genome\_Tile|1  
CCGATTGCTGACCGTAGGTCATCCATATTATCCTATCAAAAAGCAAAGTGGACGGAACCC  
>HPV106\_Alpha\_71726710\_nt6301\_Genome\_Tile|1  
ACTCCATGCAATACCTCCAATGTCACTGCAGGGGATTGTCCTCCTTTGGAATCACATCT  
>HPV106\_Alpha\_71726710\_nt6601\_Genome\_Tile|1  
GAAGGGTTTTTACTAAAGGGGCCTACTACTACATCCCGCGCCTCTGTACAAGCTCACTA  
>HPV106\_Alpha\_71726710\_nt7061\_Genome\_Tile|1  
CCATAACATGTCAAAGCCCTCCGCGGCGCCTGCAAAGAAAAGGACCCCTTACGATGGGC  
>HPV106\_Alpha\_71726710\_nt7241\_Genome\_Tile|1  
AGCGTCTCGCACCATCGTCCACCCACCAGCCACAAAGCGTAAACGGTCCAAGCGTTCCT  
>HPV106\_Alpha\_71726710\_nt7281\_Genome\_Tile|1  
TAAACGGTCCAAGCGTTCCTAACTGTGTTGCTGCTGTGGGTGTTGGGTGTACCTGTTGTTGT  
>HPV106\_Alpha\_71726710\_nt7321\_Genome\_Tile|1  
TTGGGTGTACCTGTTGTTGTGTATATAATGTGTGTTGTACTGCATGTATGTACGTTGGTT  
>HPV106\_Alpha\_71726710\_nt7341\_Genome\_Tile|1  
GTATATAATGTGTGTTGTACTGCATGTATGTACGTTGGTTGTATGTGCTGTGACTGTGTG  
>HPV106\_Alpha\_71726710\_nt7361\_Genome\_Tile|1  
TGCATGTATGTACGTTGGTTGTATGTGCTGTGACTGTGTGTGTATGGGGCGGGACCCCCC  
>HPV106\_Alpha\_71726710\_nt7381\_Genome\_Tile|1  
GTATGTGCTGTGACTGTGTGTGTATGGGGCGGGACCCCCCCTGGTATGTATGTTTCCTG  
>HPV106\_Alpha\_71726710\_nt7761\_Genome\_Tile|1  
ATGCATTTCTTAATCTATATTGTCTATGTTACTCACACTTCAATAAACTATACTTTTAGG

>HPV106\_Alpha\_71726710\_nt7881\_Genome\_Tile|1  
GCTATTCAACAATGTGTCTTATATAATTGTTCAACAAATTCAAACATGTGTTTACCACAC  
>HPV68a\_Alpha\_71726685\_nt0441\_Genome\_Tile|1  
GGACCGCAGACGCATACGTCAAGAAACACAAGTTTAAAGTAACATATGCATGGACCAAAGCC  
>HPV68a\_Alpha\_71726685\_nt1081\_Genome\_Tile|1  
CGAAAGTATACAGACAGTATAGAAAGCAGTCCTTTAGCAAAGTCGCCATTACAGGAATTA  
>HPV68a\_Alpha\_71726685\_nt1101\_Genome\_Tile|1  
AGAAAGCAGTCCTTTAGCAAAGTCGCCATTACAGGAATTATCACTAAATGTAAGCAGTAC  
>HPV68a\_Alpha\_71726685\_nt1341\_Genome\_Tile|1  
AAACCAGGATCCCTAAATCACCTACTACCCAACCTAAAGTATTATTACAATGTAACAATAA  
>HPV68a\_Alpha\_71726685\_nt1361\_Genome\_Tile|1  
CTACTACCCAACCTTAAAGTATTATTACAATGTAACAATAAAAAGGCTGCAATGTTAACAG  
>HPV68a\_Alpha\_71726685\_nt1521\_Genome\_Tile|1  
AAATCCAACCATTTGCGGAAGGGTTTAAACACTAATTAAACAATATGCATTGTATACCCA  
>HPV68a\_Alpha\_71726685\_nt1541\_Genome\_Tile|1  
GGTTTAAACACTAATTAAACAATATGCATTGTATACCCATATACAATGTTTAGATACAA  
>HPV68a\_Alpha\_71726685\_nt1561\_Genome\_Tile|1  
CAATATGCATTGTATACCCATATACAATGTTTAGATACAAAAACTGGAATATTAATACTA  
>HPV68a\_Alpha\_71726685\_nt3041\_Genome\_Tile|1  
GTATGGTATGATGGGGACAAGAGTAACCAATGCATTATGTAGTGTGGGTACAATTTAC  
>HPV68a\_Alpha\_71726685\_nt3141\_Genome\_Tile|1  
GTGTGGATTACTGGGGTGATATTATATGTATGAACAACAAAAACCTATTACGAAAGGT  
>HPV68a\_Alpha\_71726685\_nt3381\_Genome\_Tile|1  
CCAAAAAACAACTCGACGTCGTCTCGGAAGTATCCCAGACAGTGGGAATCACTGAGC  
>HPV68a\_Alpha\_71726685\_nt3581\_Genome\_Tile|1  
AAATGTCTTAGGTATAGGTTGCAAAAACATAACGCTTTGTATGACAATATATCATGTACA  
>HPV68a\_Alpha\_71726685\_nt3601\_Genome\_Tile|1  
GCAAAAACATAACGCTTTGTATGACAATATATCATGTACATGGCATTGGATAAGGGGTAG  
>HPV68a\_Alpha\_71726685\_nt3741\_Genome\_Tile|1  
TACCATCTAGTGTAACTGTGTCATTGGGGTATATGACATTATAAGTGTGTATTGACCCAC  
>HPV68a\_Alpha\_71726685\_nt3761\_Genome\_Tile|1  
TCATTGGGGTATATGACATTATAAGTGTGTATTGACCCACACTGTACACTATATGTATAT  
>HPV68a\_Alpha\_71726685\_nt3941\_Genome\_Tile|1  
GTGTTTATATTAGTTAGAACTACACCATTTGAGGTGTTTGCTGTATACCTACTTTTTTTTT  
>HPV68a\_Alpha\_71726685\_nt3961\_Genome\_Tile|1  
TACACCATTTGAGGTGTTTGCTGTATACCTACTTTTTTTTTTATACTGCCTATGTGGTTATT  
>HPV68a\_Alpha\_71726685\_nt3981\_Genome\_Tile|1  
CTGTATACCTACTTTTTTTTTTATACTGCCTATGTGGTTATTACACAGTCTTACTCTTAATA  
>HPV68a\_Alpha\_71726685\_nt4001\_Genome\_Tile|1  
ATACTGCCTATGTGGTTATTACACAGTCTTACTCTTAATACTATAACAGTAACTGTTATAG  
>HPV68a\_Alpha\_71726685\_nt4021\_Genome\_Tile|1  
ACACAGTCTTACTCTTAATACTATAACAGTAACTGTTATAGTGTGCATTTGTATTGTTGTT  
>HPV68a\_Alpha\_71726685\_nt4041\_Genome\_Tile|1  
CTATACAGTAACTGTTATAGTGTGCATTTGTATTGTTGTTTATTTGTATAAATAAATATG  
>HPV68a\_Alpha\_71726685\_nt4061\_Genome\_Tile|1  
TGTGCATTTGTATTGTTGTTTATTTGTATAAATAAATATGGTTTCACACCGTGCTGCCAG  
>HPV68a\_Alpha\_71726685\_nt4561\_Genome\_Tile|1  
CTAGTTTTACTAACCCTGCATTTACAGACCCGACTATAATAGAAGTGCCACAAACAGGTG  
>HPV68a\_Alpha\_71726685\_nt4581\_Genome\_Tile|1  
TTTACAGACCCGACTATAATAGAAGTGCCACAAACAGGTGAGGTGCTCGGTAATGTGTTT  
>HPV68a\_Alpha\_71726685\_nt4961\_Genome\_Tile|1  
ATCCCGAAGAGGAACAGTACGTTTTAGCAGAGTAGGCAAAAAGGCGACCATGTTTACACG  
>HPV68a\_Alpha\_71726685\_nt5061\_Genome\_Tile|1  
GATATTAGTAACATTACCCCTGCTGACAGCATTGAACTACAACCATTTGGTTGCCCTGAG  
>HPV68a\_Alpha\_71726685\_nt5081\_Genome\_Tile|1

TGCTGACAGCATTGAACTACAACCATTGGTTGCCCCTGAGCAGGCGGACCCTATGGATAA  
>HPV68a\_Alpha\_71726685\_nt5101\_Genome\_Tile|1  
AACCATTGGTTGCCCCTGAGCAGGCGGACCCTATGGATAACTTATATGATATATATGCAC  
>HPV68a\_Alpha\_71726685\_nt5121\_Genome\_Tile|1  
CAGGCGGACCCTATGGATAACTTATATGATATATATGCACCTGATACTGACAATACTACA  
>HPV68a\_Alpha\_71726685\_nt5141\_Genome\_Tile|1  
CTTATATGATATATATGCACCTGATACTGACAATACTACAGTATTAGATACTGCATTTCA  
>HPV68a\_Alpha\_71726685\_nt5161\_Genome\_Tile|1  
CTGATACTGACAATACTACAGTATTAGATACTGCATTTTCATAATGCTACATTTACTACTC  
>HPV68a\_Alpha\_71726685\_nt5181\_Genome\_Tile|1  
GTATTAGATACTGCATTTTCATAATGCTACATTTACTACTCGTTCCACATATCAGTTCCT  
>HPV68a\_Alpha\_71726685\_nt5201\_Genome\_Tile|1  
TAATGCTACATTTACTACTCGTTCCACATATCAGTTCCTTCATTGGCTTCTGCTGCATC  
>HPV68a\_Alpha\_71726685\_nt5221\_Genome\_Tile|1  
GTTCCACATATCAGTTCCTTCATTGGCTTCTGCTGCATCCACTACATATACTAATACTA  
>HPV68a\_Alpha\_71726685\_nt5261\_Genome\_Tile|1  
CACTACATATACTAATACTACCATTCTCTGGTACTGCTTGGAACACGCCTGTAAATAC  
>HPV68a\_Alpha\_71726685\_nt5321\_Genome\_Tile|1  
TGGTCCTGATGTTGTATTACCATCTACAACCCACAGTTGCCTTTAACACCCTCTACTCC  
>HPV68a\_Alpha\_71726685\_nt5341\_Genome\_Tile|1  
CATCTACAACCCACAGTTGCCTTTAACACCCTCTACTCCAATTGATACAACCTTTGCCA  
>HPV68a\_Alpha\_71726685\_nt5361\_Genome\_Tile|1  
CCTTTAACACCCTCTACTCCAATTGATACAACCTTTGCCATAACTATATATGGTTCCAAT  
>HPV68a\_Alpha\_71726685\_nt6001\_Genome\_Tile|1  
GGTAAATCTTGTAAGCCTACCAATGTACAACAAGGGGACTGTCCCCCATTTGGAATTGGTA  
>HPV68a\_Alpha\_71726685\_nt6261\_Genome\_Tile|1  
GCATTTTTTGAATAGGGGAGGCATGGTAGGGGACACTATTCCCCTGACATGTATATTAA  
>HPV68a\_Alpha\_71726685\_nt6281\_Genome\_Tile|1  
GCATGGTAGGGGACACTATTCCCCTGACATGTATATTAAAGGGCACTGACATTCGTGAAA  
>HPV68a\_Alpha\_71726685\_nt6301\_Genome\_Tile|1  
CCCCTGACATGTATATTAAAGGGCACTGACATTCGTGAAACTCCTAGTAGTTATGTGTAT  
>HPV68a\_Alpha\_71726685\_nt6501\_Genome\_Tile|1  
CAGTACTAATTTTACATTGTCCACTACTACAGACTCTACTGTACCAGCTGTGTATGATTC  
>HPV68a\_Alpha\_71726685\_nt6721\_Genome\_Tile|1  
TCTGCTAGTCTTGTAGATACATACCGCTACCTACAATCAGCAGCAATTACATGTCAAAAG  
>HPV68a\_Alpha\_71726685\_nt6821\_Genome\_Tile|1  
TTAACTTTTGAATGTGGATTTAAAGGAAAAGTTTAGTTCTGAACTGGACCAATTCCCAT  
>HPV68a\_Alpha\_71726685\_nt6841\_Genome\_Tile|1  
TTAAAGGAAAAGTTTAGTTCTGAACTGGACCAATTCCCATTAGGACGCAAATTTCTGTTA  
>HPV68a\_Alpha\_71726685\_nt6861\_Genome\_Tile|1  
TGAAGTGGACCAATTCCCATTAGGACGCAAATTTCTGTTACAGGCAGGTGTTGCGAGACG  
>HPV68a\_Alpha\_71726685\_nt7001\_Genome\_Tile|1  
AATAATTGTTATATGTCTTGTGTTTGTATGTTGTTTGTCTGTGTGGTTGTATATGTGTCAT  
>HPV68a\_Alpha\_71726685\_nt7021\_Genome\_Tile|1  
TTTTGTATGTTGTTTGTCTGTGTGGTTGTATATGTGTCATGTTGGTGTGTTGTTGTG  
>HPV68a\_Alpha\_71726685\_nt7161\_Genome\_Tile|1  
TGTCCGTGTCTTTGTGGTTGCACCCTGTGACTAACATATGTCCTTGTGTTTACATATAAT  
>HPV68a\_Alpha\_71726685\_nt7261\_Genome\_Tile|1  
AAGGTGTGTTACATTATATGCAATATATTATGGTTGCAAACATATACCGTGTGGCCATTT  
>HPV68a\_Alpha\_71726685\_nt7281\_Genome\_Tile|1  
CAATATATTTATGGTTGCAAACATATACCGTGTGGCCATTTTGTATGGCCGGGTTGTGTGC  
>HPV68a\_Alpha\_71726685\_nt7361\_Genome\_Tile|1  
ACTATTTGCTTTTAGATAGTATTAAAACCTATGTGTTTCAGCAAAAACATGTTTTACCTT  
>HPV68a\_Alpha\_71726685\_nt7381\_Genome\_Tile|1  
ATTAAAACCTATGTGTTTCAGCAAAAACATGTTTTACCTTGAGTTACCCACATAGTTGGC

>HPV68a\_Alpha\_71726685\_nt7401\_Genome\_Tile|1  
GCAAAAACATGTTTTACCTTGAGTTACCCACATAGTTGGCACCAGTAACAGTCGTACTGG  
>HPV68a\_Alpha\_71726685\_nt7541\_Genome\_Tile|1  
AAACTGCTTTTAGGCATAAAGTTTTAACTGTTTTTGCTTGCCTAATAGCATAGTTGGCCA  
>HPV68a\_Alpha\_71726685\_nt7601\_Genome\_Tile|1  
GTATAACTACTTTTGCATTCAAGAATCTGTCTGGTAGTGTAAAGTTATACAGTGACTAATA  
>HPV68a\_Alpha\_71726685\_nt7621\_Genome\_Tile|1  
AAGAATCTGTCTGGTAGTGTAAAGTTATACAGTGACTAATACTACATCCATAAATTTGTGC  
>HPV68a\_Alpha\_71726685\_nt7681\_Genome\_Tile|1  
AACCGAAAAAGGTTGGGCACACATACCAATACTTTTACTTATAACATTTTACAATTATTC  
>HPV80\_Beta\_2911565\_nt0281\_Genome\_Tile|1  
AGGTTTTGTCAAAGATTTTAACTTATATAGAGTTAGTAAGTTTTGATCGCAAATGTTTG  
>HPV80\_Beta\_2911565\_nt0421\_Genome\_Tile|1  
TACATTTTATGAACAGTCAGTGTGTGGTTGGGAGATTGAGGTAGTTGAGCGAAAAGCTGT  
>HPV80\_Beta\_2911565\_nt0461\_Genome\_Tile|1  
GTAGTTGAGCGAAAAGCTGTTGGAGACATTACTATTCGTTGCAAATTTTGTTTAAAGAAA  
>HPV80\_Beta\_2911565\_nt1481\_Genome\_Tile|1  
GTATTAACGTGTGTATGCTGTACAAGACGAACTATTAGAAAGTTCCAAACAACCTTTTAATT  
>HPV80\_Beta\_2911565\_nt1641\_Genome\_Tile|1  
TAACATAATCTTTTGCAAGTATCAGAAGTACAAATAATAGCTGAACCGCCAAAACCTTAGAA  
>HPV80\_Beta\_2911565\_nt2081\_Genome\_Tile|1  
TCAGATATTGTAAAGTTTATTAGATATCAAGAGATTAATTTTATTTCAGTTTTTAAATGCG  
>HPV80\_Beta\_2911565\_nt2101\_Genome\_Tile|1  
TAGATATCAAGAGATTAATTTTATTTCAGTTTTTAAATGCGTTTAAATTGTTTTTACACAA  
>HPV80\_Beta\_2911565\_nt2121\_Genome\_Tile|1  
TTATTTCAGTTTTTAAATGCGTTTAAATTGTTTTTACACAATACTCCAAAAGAAAAGCTGCT  
>HPV80\_Beta\_2911565\_nt3041\_Genome\_Tile|1  
GGTTTATACTGTCTGGTCCCACATTTATTATCAGACTTTAGATGATACATGGAAGAAAGT  
>HPV80\_Beta\_2911565\_nt3921\_Genome\_Tile|1  
CGTTCACGGATGTTACTTGCATTTACTTCAAACACTGAGAGACAGCTTTTTTATTAACATA  
>HPV80\_Beta\_2911565\_nt4021\_Genome\_Tile|1  
TAGATGATTGTAGCCCATGTGCCTGTAATTAACATAACAAGCGCTATTTTTTGCTTTTGC  
>HPV80\_Beta\_2911565\_nt4881\_Genome\_Tile|1  
AGTTCAGTCTCTTTCAAGTCTTCGAAGAGCTTTATATAACCGAAGATTAAGTGAACAAGT  
>HPV80\_Beta\_2911565\_nt5421\_Genome\_Tile|1  
AGATCATATAGAAGATTTTAGCGGGTCTCAATTAGTATTTGGTAATGCAAGGCGTAGTAC  
>HPV80\_Beta\_2911565\_nt5441\_Genome\_Tile|1  
GCGGGTCTCAATTAGTATTTGGTAATGCAAGGCGTAGTACTACTACATACACAGTTCCTC  
>HPV80\_Beta\_2911565\_nt5501\_Genome\_Tile|1  
GATTTTGAGTCTCCTAGAAATACTGGATTTTATATTCAGGATGTTTCAGGGCTATAATGTAG  
>HPV80\_Beta\_2911565\_nt6101\_Genome\_Tile|1  
GGACACAGAAAATAAGTGGCTACCAGGGAGGTTCTACTGATGACAGACAGAATACTTC  
>HPV80\_Beta\_2911565\_nt6241\_Genome\_Tile|1  
GTGCATCAGAAGAAAATAACCAAGCTGGAAAATGTCCTCCATTAGAACTTAAAAATACTG  
>HPV80\_Beta\_2911565\_nt6761\_Genome\_Tile|1  
AAACACTAATTTACCATTAAGTGTTACTTCTGATGGTAGTACTATAACTGAATATAATAC  
>HPV80\_Beta\_2911565\_nt7141\_Genome\_Tile|1  
TAGGAAGGAAATTTATATTTTCAGGCAGGTTTACAAAGACGTCCCAAACCATCAGATCTT  
>HPV77\_Alpha\_2911558\_nt0061\_Genome\_Tile|1  
AGAGACATATAAAAAGGCGTCAGTACAGCCTGGCAGTAGCTATGTCTACAAGTGATGGAC  
>HPV77\_Alpha\_2911558\_nt3861\_Genome\_Tile|1  
GCCATTTTAGGCCACATGTCTGTATTTACATAGAACTGTGCTACACTGCTATTTAGCCCT  
>HPV77\_Alpha\_2911558\_nt4061\_Genome\_Tile|1  
TACAGGTTGTTTCTCGCATTTGCACGCAATAATCAGTAACACTACCATGTATCCTATCATA  
>HPV77\_Alpha\_2911558\_nt4181\_Genome\_Tile|1

TTGGGTTTGTAACTGTTTGTATGCTTATTATTGTTTATTGTATATAGACACTTGGGA  
>HPV77\_Alpha\_2911558\_nt4201\_Genome\_Tile|1  
TGTATGCTTATTATTGTTTATTGTATATAGACACTTGGGATTATTGTAATGTTGTATGCT  
>HPV77\_Alpha\_2911558\_nt4221\_Genome\_Tile|1  
TTGTATATAGACACTTGGGATTATTGTAATGTTGTATGCTGCACCTTATAGATGTGGTGTA  
>HPV77\_Alpha\_2911558\_nt4241\_Genome\_Tile|1  
TTATTGTAATGTTGTATGCTGCACCTTATAGATGTGGTGTACTTGTATTTTCATACGTGGCC  
>HPV77\_Alpha\_2911558\_nt4261\_Genome\_Tile|1  
GCACCTTATAGATGTGGTGTACTTGTATTTTCATACGTGGCCATTGGATTGTGTATGTGTAC  
>HPV77\_Alpha\_2911558\_nt4281\_Genome\_Tile|1  
CTTGTATTTTCATACGTGGCCATTGGATTGTGTATGTGTACTTGCCTTTGTACCACTTTTT  
>HPV77\_Alpha\_2911558\_nt4301\_Genome\_Tile|1  
ATTGGATTGTGTATGTGTACTTGCCTTTGTACCACTTTTTTTGTGTTTGTGTTTTGTTTT  
>HPV77\_Alpha\_2911558\_nt4321\_Genome\_Tile|1  
TTGCTTTTGTACCACTTTTTTTGTGTTTGTGTTTTGTTTTTTCTTTCAGTTGAATAAA  
>HPV77\_Alpha\_2911558\_nt4841\_Genome\_Tile|1  
TAGTTACTAGCACAACTTCACTAATCCTTGTATACTGAGCCGTCACCTGGTAGAAGTGC  
>HPV77\_Alpha\_2911558\_nt5461\_Genome\_Tile|1  
GATGTAGACGATGCTGACGTGGCCTTTACGAACAGTGGTCGCAATCTTACCTCTTTTGGG  
>HPV77\_Alpha\_2911558\_nt5501\_Genome\_Tile|1  
GCAATCTTACCTCTTTTGGGGTTCGCGGTGCATCGTCCTCCCTTCTGCACTGTCCA  
>HPV77\_Alpha\_2911558\_nt5521\_Genome\_Tile|1  
GGTCGCGGTGCATCGTCCTCCCTCCCTTCTGCACTGTCCACTAAGATTGGCAATGTAACA  
>HPV77\_Alpha\_2911558\_nt5581\_Genome\_Tile|1  
ATTCCATTTATATCTCCGGTGGATGTGCATTTACACACTGGCCCCGACATTGTTTTGCCT  
>HPV77\_Alpha\_2911558\_nt6301\_Genome\_Tile|1  
GGGTACCCCTTGTGCACGTACTAATACTACCCAGGAGACTGTCTCCCTTGGAGTTAAT  
>HPV77\_Alpha\_2911558\_nt6561\_Genome\_Tile|1  
GACACTTTTTCAATCGTGCGGGTGATGTTGGAGACAAAATTCCAGAATCTTTGTACCTCA  
>HPV77\_Alpha\_2911558\_nt6581\_Genome\_Tile|1  
GGTGATGTTGGAGACAAAATTCCAGAATCTTTGTACCTCAAAGGGAGTAGCGGGCGTGAG  
>HPV77\_Alpha\_2911558\_nt7221\_Genome\_Tile|1  
GTTCCGGTGGTCCCTCTCGCAAACGCCGGCGCCACCCCCTCCCCAGCTTCGACCAAAC  
>HPV77\_Alpha\_2911558\_nt7321\_Genome\_Tile|1  
GTATGTATGTTTACGACAACATATGTATGTGTACTGTGTATTGCATGTGTTTTGTATGGTA  
>HPV77\_Alpha\_2911558\_nt7341\_Genome\_Tile|1  
TATGTATGTGTACTGTGTATTGCATGTGTTTTGTATGGTATGTGTGTGTATACAACAAC  
>HPV76\_Beta\_2911551\_nt0001\_Genome\_Tile|1  
CAGATTTGTTCCAACAACGATTTTGGCGCGAACATTTTGGCAGCAGAAGAGCGACGGTAA  
>HPV76\_Beta\_2911551\_nt0461\_Genome\_Tile|1  
GCAGAAAATATAGCGAACATTATAATAAGGTGTCAATTTTGTGTTGAAACGCCTGGATTTA  
>HPV76\_Beta\_2911551\_nt4141\_Genome\_Tile|1  
ACTTTGATAGGTTATAACATTAATTAACCTACTAACCTTGCTTGCACTACTAATATATTA  
>HPV76\_Beta\_2911551\_nt4801\_Genome\_Tile|1  
CAACACTAGGGGAATCCGCATTGTGACACCAAATTGTAGTTACCAGTGGCTCAGGTGGCC  
>HPV76\_Beta\_2911551\_nt5141\_Genome\_Tile|1  
AGATGTAGCTACTGTTGAGGAGCCACCTAATAGAGACTTTTTGGATATAGCTAAACTAAG  
>HPV76\_Beta\_2911551\_nt5161\_Genome\_Tile|1  
AGCCACCTAATAGAGACTTTTTGGATATAGCTAAACTAAGTCGTCCTACTATATTCAGACA  
>HPV76\_Beta\_2911551\_nt5261\_Genome\_Tile|1  
AGCCTCTATAAGGACTAGAAGTGGTGCTACTGTAGGGGCTCAGGTACATTTCTATAAAGA  
>HPV76\_Beta\_2911551\_nt5581\_Genome\_Tile|1  
GATTTACAACACCCCGAGCAGATACATTTTATGTGCAGGACTTAGAGGGTTATACAGTGT  
>HPV76\_Beta\_2911551\_nt6041\_Genome\_Tile|1  
AGATCCCAATAGATTTCGCCTTGGTAGACATGAATGTCTATAATCCTGAGAAGGAAAGACT

>HPV76\_Beta\_2911551\_nt6341\_Genome\_Tile|1  
AGGGGTAGGCAAATGTCCACCTTTGGAACTGGTAAATACTGTAATAGAAGATGGAGATAT  
>HPV76\_Beta\_2911551\_nt7141\_Genome\_Tile|1  
AAAAGGATCCATATGAGCAATACAATTTTGGCAAGTGGATCTAACTGAGAAATTGTCAT  
>HPV75\_Beta\_2911544\_nt0461\_Genome\_Tile|1  
GCAGAAAGTATACATAATCTTATTGTAAGGTGCCAGTTTTGTCTGAAACGTTTGGATATA  
>HPV75\_Beta\_2911544\_nt5121\_Genome\_Tile|1  
CTACTATTGAGGAACCCCCAAATAGGGATTTTTTTAGATATAGCAAAGCTCAGTCGTCCAG  
>HPV75\_Beta\_2911544\_nt5241\_Genome\_Tile|1  
TTAGAACCAGGAGTGGGGCTACTGTAGGAGCTCAGGTTTCATTTTTATACAGATTTAAGTA  
>HPV73\_Alpha\_1491692\_nt0061\_Genome\_Tile|1  
CATATAAAAGTAGGAAAGCAAAAACGCTACAGATTGGGAAATGCTGTTTCCCAATTCAG  
>HPV73\_Alpha\_1491692\_nt0121\_Genome\_Tile|1  
AAGAACGACCATACAAGCTACAAGCGTTATGTGACGAAGTGAATATTTCTATACATGATA  
>HPV73\_Alpha\_1491692\_nt0141\_Genome\_Tile|1  
CAAGCGTTATGTGACGAAGTGAATATTTCTATACATGATATAAACCTGGACTGTGTGTTT  
>HPV73\_Alpha\_1491692\_nt0301\_Genome\_Tile|1  
GTTTAAAATTTTATTCTAAAATTAGAGAGTATAGGCGATATAGACAATCAGTATATGGCA  
>HPV73\_Alpha\_1491692\_nt0321\_Genome\_Tile|1  
ATTAGAGAGTATAGGCGATATAGACAATCAGTATATGGCACTACGTTAGAAAATTTAACT  
>HPV73\_Alpha\_1491692\_nt0721\_Genome\_Tile|1  
ACGAAGTGTCAGTGCACAGTATGCCTTGCCATTGAAAGCAACAAAGCTGATTTAAGAGTG  
>HPV73\_Alpha\_1491692\_nt0741\_Genome\_Tile|1  
ATGCCTTGCCATTGAAAGCAACAAAGCTGATTTAAGAGTGATAGAAGAGTTGCTTATGGG  
>HPV73\_Alpha\_1491692\_nt1141\_Genome\_Tile|1  
AAAAGAGATGAATTCATAGACAAACAGCTTAGTCCACAAATAAATGTATTGTCAATAAGT  
>HPV73\_Alpha\_1491692\_nt1161\_Genome\_Tile|1  
CAAACAGCTTAGTCCACAAATAAATGTATTGTCAATAAGTAGCGGTAGAAGTACATCTAA  
>HPV73\_Alpha\_1491692\_nt1281\_Genome\_Tile|1  
GACAGAGGTACCGGGACTTGGGGCAGGGGTAGGGTGTTTACAAAATGTTAATGAAGAAGG  
>HPV73\_Alpha\_1491692\_nt1321\_Genome\_Tile|1  
CAAAATGTTAATGAAGAAGGCAACCAAAATTGTGTCGCCACGTGAAAGCAGTAGTGGGTCC  
>HPV73\_Alpha\_1491692\_nt1421\_Genome\_Tile|1  
CTATAACAGATATTACAAATTTATTACAAAGGAATAATGCAAAAGCAGCATTGCTAGCAA  
>HPV73\_Alpha\_1491692\_nt1581\_Genome\_Tile|1  
AATACCCTCACTTGCAGAAAGTTTAAATCCTTACTAACACAGTATTGTATGTATATACA  
>HPV73\_Alpha\_1491692\_nt2141\_Genome\_Tile|1  
GTGATTTAACTAATGATGGTGGTAATTGGAAAGATATTGTGCTATTCCTAAGATATCAAA  
>HPV73\_Alpha\_1491692\_nt2161\_Genome\_Tile|1  
GGTAATTGGAAAGATATTGTGCTATTCCTAAGATATCAAAATGTAGAATTTATGCCTTTT  
>HPV73\_Alpha\_1491692\_nt2181\_Genome\_Tile|1  
GCTATTCCTAAGATATCAAAATGTAGAATTTATGCCTTTTTTAATTACATTAAAACAATT  
>HPV73\_Alpha\_1491692\_nt3121\_Genome\_Tile|1  
CAATAGCATGCAATATGTATTTTGGACACATATATATTGTTGGTATGAAGGGGGGTGGGC  
>HPV73\_Alpha\_1491692\_nt3141\_Genome\_Tile|1  
TTTGGACACATATATATTGTTGGTATGAAGGGGGGTGGGCAAAGGTAGGTAGCAAAATAG  
>HPV73\_Alpha\_1491692\_nt3701\_Genome\_Tile|1  
ATGTTTACAACGTATTGCAACAACAACATTTTTTACAACATGTAAAAATACCACAAACT  
>HPV73\_Alpha\_1491692\_nt3721\_Genome\_Tile|1  
ACAACAACATTTTTTACAACATGTAAAAATACCACAAACTATTGTAGTTACATCAGGATA  
>HPV73\_Alpha\_1491692\_nt3741\_Genome\_Tile|1  
ATGTAAAAATACCACAAACTATTGTAGTTACATCAGGATACATGTCTTTGTAACATTGGT  
>HPV73\_Alpha\_1491692\_nt3761\_Genome\_Tile|1  
ATTGTAGTTACATCAGGATACATGTCTTTGTAACATTGGTTACACAGTATATATGATTCT  
>HPV73\_Alpha\_1491692\_nt3781\_Genome\_Tile|1

CATGTCCTTTGTAACATTTGGTTACACAGTATATGATTCCTTTGGTATATTTGTATTTTGTG  
>HPV73\_Alpha\_1491692\_nt3801\_Genome\_Tile|1  
TACACAGTATATATGATTCTTTGTATATTTGTATTTTGTTTTGTGTTGGCTTTTGTGTTG  
>HPV73\_Alpha\_1491692\_nt3921\_Genome\_Tile|1  
ATAATAACCTTTATACATGTATCACAATCATTGTTAAAAGTATTTTTTTTTATATGTTTTG  
>HPV73\_Alpha\_1491692\_nt4001\_Genome\_Tile|1  
ACTTGTACATTACCATGCTACATTACAAATAACATAAACAATTTTACATATATAATAAAC  
>HPV73\_Alpha\_1491692\_nt4021\_Genome\_Tile|1  
CATTACAAATAACATAAAACAATTTTACATATATAATAAACTGCCTAATATTTTTTAGTGTA  
>HPV73\_Alpha\_1491692\_nt4341\_Genome\_Tile|1  
ATTCCATTACAACCTATACGACCATCAGTTGTTACGTCGTGTTGGGCCTTCAGATTCTTCT  
>HPV73\_Alpha\_1491692\_nt4361\_Genome\_Tile|1  
ACCATCAGTTGTTACGTCGTGTTGGGCCTTCAGATTCTTCTATTGTTTCATTAGTGGAAGA  
>HPV73\_Alpha\_1491692\_nt4401\_Genome\_Tile|1  
ATTGTTTCATTAGTGGAAGAATCAAGTTTATAGAGTCAGGTATACCTGGTCCCTACATCT  
>HPV73\_Alpha\_1491692\_nt4421\_Genome\_Tile|1  
ATCAAGTTTTATAGAGTCAGGTATACCTGGTCCTACATCTATAGTGCCTTCTACTTCAGG  
>HPV73\_Alpha\_1491692\_nt4441\_Genome\_Tile|1  
GTATACCTGGTCCCTACATCTATAGTGCCTTCTACTTCAGGGTTTGATATTACAACCTTCTG  
>HPV73\_Alpha\_1491692\_nt5081\_Genome\_Tile|1  
TCCTATACCTACTAATGATATTGAAATGCAACCTTTAGTTACACCACAAACACCTAGTAT  
>HPV73\_Alpha\_1491692\_nt5141\_Genome\_Tile|1  
AGTAACTGGTAGTAGTATTAATGATGGGTATATGATGTGTTTTTAGACAATGATGTAGA  
>HPV73\_Alpha\_1491692\_nt5161\_Genome\_Tile|1  
ATGATGGGTTATATGATGTGTTTTTAGACAATGATGTAGAAGAGACTGTACTACAACAAA  
>HPV73\_Alpha\_1491692\_nt5181\_Genome\_Tile|1  
TTTTTAGACAATGATGTAGAAGAGACTGTACTACAACAAACATATACACCTACAAGTATA  
>HPV73\_Alpha\_1491692\_nt5221\_Genome\_Tile|1  
CATATACACCTACAAGTATACATAGTAATAGTTTGTAGTTAGTAGTGATATTTCTACTGCAA  
>HPV73\_Alpha\_1491692\_nt5301\_Genome\_Tile|1  
TTTAGTACTGGGTTAGACACACATCCTGGTCCAGATATTGCTTTACCACTACCTTCTACA  
>HPV73\_Alpha\_1491692\_nt5401\_Genome\_Tile|1  
GTCCTATATATATTTATGGGTCAGGTTTTATATTACACCCTAGTTATTATTTGTTAAAGC  
>HPV73\_Alpha\_1491692\_nt5601\_Genome\_Tile|1  
TAGCACACGTTTGTGGCTGTGGGACACCCATATTTCCATATCAAGGATTCTCAAAAACG  
>HPV73\_Alpha\_1491692\_nt5861\_Genome\_Tile|1  
AATTAGATGATACTGAAAATGCTCCTAAATACATTGCTGGACAAAATACAGATGGTAGAG  
>HPV73\_Alpha\_1491692\_nt5881\_Genome\_Tile|1  
GCTCCTAAATACATTGCTGGACAAAATACAGATGGTAGAGAATGTATGTCAGTGGATTAT  
>HPV73\_Alpha\_1491692\_nt6001\_Genome\_Tile|1  
GGCAGCCATGTACTTCACAACTGTTAATACTGGTGATTGTCCCCCACTGGAATTAAAG  
>HPV73\_Alpha\_1491692\_nt6501\_Genome\_Tile|1  
AAGCACTAATTTTCTGTATGTGTAGGTACACAGGCTAGTAGCTCTACTACAACGTATGC  
>HPV73\_Alpha\_1491692\_nt6521\_Genome\_Tile|1  
GTGTAGGTACACAGGCTAGTAGCTCTACTACAACGTATGCCAACTCTAATTTTAAGGAAT  
>HPV73\_Alpha\_1491692\_nt6921\_Genome\_Tile|1  
ACGTCCTAAGTTACAAGCTTCTAAACGTTCTGCATCTGCTACCACAAGTGCCACACCTAA  
>HPV73\_Alpha\_1491692\_nt7001\_Genome\_Tile|1  
TTTAATAAGTGTAATGTGTATGTGTTGTTTGTGTATGTTACATGTGTTTTGTATGTTTTG  
>HPV73\_Alpha\_1491692\_nt7081\_Genome\_Tile|1  
TACTAATACTGTGTGTATGTTTATGTACATGTGTATAACTGTTTGTGTTTATATATATGTAT  
>HPV73\_Alpha\_1491692\_nt7141\_Genome\_Tile|1  
GTATTTGTGTGTATGTGTATGTGTATGTGTATGTGTAGTAATGTTTGTATGTATGTTTAA  
>HPV73\_Alpha\_1491692\_nt7161\_Genome\_Tile|1  
GTGTATGTGTATGTGTAGTAATGTTTGTATGTATGTTTAAATAAAGTTTATATGTGTGTTT



>HPV73\_Alpha\_1491692\_nt7181\_Genome\_Tile|1  
ATGTTTGTATGTATGTTTAAATAAAGTTTATATGTGTGTTGTGTGGGTGGTTTACTTGACT  
>HPV73\_Alpha\_1491692\_nt7201\_Genome\_Tile|1  
TAAAGTTTATATGTGTGTTGTGTGGGTGGTTTACTTGACTACTGTGCTTCCATTTTGTAT  
>HPV73\_Alpha\_1491692\_nt7221\_Genome\_Tile|1  
TGTGGGTGGTTTACTTGACTACTGTGCTTCCATTTTGTATAGTCGCCATTTTACATGCAT  
>HPV73\_Alpha\_1491692\_nt7241\_Genome\_Tile|1  
ACTGTGCTTCCATTTTGTATAGTCGCCATTTTACATGCATTAAAGGTAAAAAGGGCAACCG  
>HPV73\_Alpha\_1491692\_nt7381\_Genome\_Tile|1  
GGCAACTTGGCAGGGTTTGTTCCTTAACATGTTTCATCCCACGCAAGGTTATAAAGGTAA  
>HPV73\_Alpha\_1491692\_nt7581\_Genome\_Tile|1  
TGTTTTTTAAATGCCAAGTAATTGTTTTATAAATGAGTAATAACGTGTTACTCATACTGC  
>HPV73\_Alpha\_1491692\_nt7601\_Genome\_Tile|1  
ATTGTTTTATAAATGAGTAATAACGTGTTACTCATACTGCACCTAAAAAGTTAAACCTAT  
>HPV59\_Alpha\_557236\_nt0021\_Genome\_Tile|1  
ATATAAAGGTAGTTGAAAAGAAAAGGGCAACGGCATGGCAGCGTTTGAGGATCCTACACA  
>HPV59\_Alpha\_557236\_nt0101\_Genome\_Tile|1  
ATTTGAGCACAACATTGAATATTCTCTGCATGATATTCGCATCAATTGTGTGTTTTGCA  
>HPV59\_Alpha\_557236\_nt0161\_Genome\_Tile|1  
AAGGGGAAC TGCAAGAAAGAGAGGTTATTGAATTTGCTTTTAAATGACTTATTTATAGTGT  
>HPV59\_Alpha\_557236\_nt0201\_Genome\_Tile|1  
TAATGACTTATTTATAGTGTATAGAGACTGTACACCGTATGCAGCGTGTCTGAAATGCAT  
>HPV59\_Alpha\_557236\_nt0221\_Genome\_Tile|1  
ATAGAGACTGTACACCGTATGCAGCGTGTCTGAAATGCATTTTCATTTTATGCAAGAGTAA  
>HPV59\_Alpha\_557236\_nt0241\_Genome\_Tile|1  
GCAGCGTGTCTGAAATGCATTTTCATTTTATGCAAGAGTAAGAGAATTAAGATATTATAGA  
>HPV59\_Alpha\_557236\_nt0281\_Genome\_Tile|1  
GAGAATTAAGATATTATAGAGATTCCGTGTATGGAGAAACATTAGAGGCTGAAACCAAGA  
>HPV59\_Alpha\_557236\_nt0321\_Genome\_Tile|1  
ATTAGAGGCTGAAACCAAGACACCGTTACATGAGCTGCTGATACGCTGTTATAGATGCCT  
>HPV59\_Alpha\_557236\_nt0341\_Genome\_Tile|1  
CACCGTTACATGAGCTGCTGATACGCTGTTATAGATGCCTAAAACCTCTATGTCCAACAG  
>HPV59\_Alpha\_557236\_nt0361\_Genome\_Tile|1  
ATACGCTGTTATAGATGCCTAAAACCTCTATGTCCAACAGATAAATTAAGCATATAACT  
>HPV59\_Alpha\_557236\_nt0401\_Genome\_Tile|1  
ATAAATTAAGCATATAACTGAAAAAAGAAGATTCCATAATATAGCTGGAATATATACAG  
>HPV59\_Alpha\_557236\_nt0461\_Genome\_Tile|1  
GACAGTGTCTGTTGGTGTCTGGACCCGAGCAAGACACCTAAGACAGCAACGACAAGCGCGTA  
>HPV59\_Alpha\_557236\_nt0481\_Genome\_Tile|1  
ACCCGAGCAAGACACCTAAGACAGCAACGACAAGCGCGTAGTGAAACACTGGTGTAAAAC  
>HPV59\_Alpha\_557236\_nt0501\_Genome\_Tile|1  
ACAGCAACGACAAGCGCGTAGTGAAACACTGGTGTAAAACAATGCATGGACCAAAAGCAA  
>HPV59\_Alpha\_557236\_nt0561\_Genome\_Tile|1  
CACTTTGTGACATTGTTTTAGATTTGGAACCACAAAATTATGAGGAAGTTGACCTTGTGT  
>HPV59\_Alpha\_557236\_nt0581\_Genome\_Tile|1  
GATTTGGAACCACAAAATTATGAGGAAGTTGACCTTGTGTGCTACGAGCAATTACCTGAC  
>HPV59\_Alpha\_557236\_nt0621\_Genome\_Tile|1  
GCTACGAGCAATTACCTGACTCCGACTCCGAGAATGAAAAAGATGAACCAGATGGAGTTA  
>HPV59\_Alpha\_557236\_nt1141\_Genome\_Tile|1  
GTGCAGTATAGAAAACAGTAGTGAGAAAGCGGCGGAGGAAAAAAGCTAAGTCACCATT  
>HPV59\_Alpha\_557236\_nt1161\_Genome\_Tile|1  
GTGAGAAAAGCGGCGGAGGAAAAAAGCTAAGTCACCATTACAAGAAATATCAGTAAATG  
>HPV59\_Alpha\_557236\_nt1181\_Genome\_Tile|1  
AAAAAAGCTAAGTCACCATTACAAGAAATATCAGTAAATGTTAACCACCCAAAAGTAAAA  
>HPV59\_Alpha\_557236\_nt1201\_Genome\_Tile|1

ACAAGAAATATCAGTAAATGTTAACCACCCAAAAGTAAAAAGAAGGTTAATAACAGTGCC  
>HPV59\_Alpha\_557236\_nt1321\_Genome\_Tile|1  
TACTGGAAATGGGGATAGCAATGGCAGTGTGTGTAGCGACAGTCAAATAGACTGTAGCGA  
>HPV59\_Alpha\_557236\_nt1341\_Genome\_Tile|1  
ATGGCAGTGTGTGTAGCGACAGTCAAATAGACTGTAGCGACAGCAGTAACATGGATGTTG  
>HPV59\_Alpha\_557236\_nt1361\_Genome\_Tile|1  
AGTCAAATAGACTGTAGCGACAGCAGTAACATGGATGTTGAAAACATAGTTCCAACATCC  
>HPV59\_Alpha\_557236\_nt1381\_Genome\_Tile|1  
CAGCAGTAACATGGATGTTGAAAACATAGTTCCAACATCCCCACTAATCAATTGTTACA  
>HPV59\_Alpha\_557236\_nt1401\_Genome\_Tile|1  
AAAACATAGTTCCAACATCCCCACTAATCAATTGTTACAGTTATTACATAGCAAAAATA  
>HPV59\_Alpha\_557236\_nt1421\_Genome\_Tile|1  
CCCCTAATCAATTGTTACAGTTATTACATAGCAAAAATAAGAAAGCAGCTATGTATGCA  
>HPV59\_Alpha\_557236\_nt1441\_Genome\_Tile|1  
GTTATTACATAGCAAAAATAAGAAAGCAGCTATGTATGCAAAATTTAAAGAATTGTATGG  
>HPV59\_Alpha\_557236\_nt2541\_Genome\_Tile|1  
TTATTACATCAAATACAAATCCAGTTACAGATAACAGGTGGCCATATTTAAATAGCAGAT  
>HPV59\_Alpha\_557236\_nt2561\_Genome\_Tile|1  
CCAGTTACAGATAACAGGTGGCCATATTTAAATAGCAGATTAAATGGTATTTAAATTTCCA  
>HPV59\_Alpha\_557236\_nt2781\_Genome\_Tile|1  
CAGGATCAAATATTAGAACATTATGAAAACGATAGTAAAGACATTAATGAACACATAAAC  
>HPV59\_Alpha\_557236\_nt2801\_Genome\_Tile|1  
TTATGAAAACGATAGTAAAGACATTAATGAACACATAAACTATTGGAAACTGGTGCGTAT  
>HPV59\_Alpha\_557236\_nt2821\_Genome\_Tile|1  
ACATTAATGAACACATAAACTATTGGAAACTGGTGCGTATGGAAAATGTAATTTTATTTG  
>HPV59\_Alpha\_557236\_nt2841\_Genome\_Tile|1  
TATTGGAAACTGGTGCGTATGGAAAATGTAATTTTATTTGCAGCAAGAGAGAACAATATA  
>HPV59\_Alpha\_557236\_nt2941\_Genome\_Tile|1  
CTAAAAACAAGGCATGTGAAGCTATTGAACTGCAGTCAAACCGTACTTCCACTGTAATGC  
>HPV59\_Alpha\_557236\_nt3081\_Genome\_Tile|1  
AACTCAGTTTGTGCCAACTCTCTAACGCCATCTGCAGCAAGGAAAACACAATGCATTAC  
>HPV59\_Alpha\_557236\_nt3101\_Genome\_Tile|1  
CTCTAACGCCATCTGCAGCAAGGAAAACACAATGCATTACACAAGCTGGACATTTATATA  
>HPV59\_Alpha\_557236\_nt3161\_Genome\_Tile|1  
TTATGTAAATGATGTAGGACAGTGGTGTAACCACAGGAAATGTGGACTTTTGGGGACT  
>HPV59\_Alpha\_557236\_nt3181\_Genome\_Tile|1  
AGTGGTGTAACCACAGGAAATGTGGACTTTTGGGGACTATATTATAAAGTGGAAGAGG  
>HPV59\_Alpha\_557236\_nt3241\_Genome\_Tile|1  
AACAGGTGTACTATGTAAATTTATACATGATGCCAAAAATATGGGACTACAGACAAGT  
>HPV59\_Alpha\_557236\_nt3381\_Genome\_Tile|1  
GGATCTTCTGAGCAACTATCATACCCCTCCGCAACGCCCCCGAAGCCACGTACTTGGGC  
>HPV59\_Alpha\_557236\_nt3401\_Genome\_Tile|1  
ATACCCCTCCGCAACGCCCCCGAAGCCACGTACTTGGGCCCCCAAACGTGGAACCGTCA  
>HPV59\_Alpha\_557236\_nt3461\_Genome\_Tile|1  
GACGAAGACTGGAAAGCGACCAAGACAGTGTGGATACACACAGCACCCCTCAGTCTACCAG  
>HPV59\_Alpha\_557236\_nt3481\_Genome\_Tile|1  
CAAGACAGTGTGGATACACACAGCACCCCTCAGTCTACCAGCGTGTCTAGTGGACTACTGTG  
>HPV59\_Alpha\_557236\_nt3521\_Genome\_Tile|1  
CGTGTCTAGTGGACTACTGTGACAACCCAGTCGTCCGTTTGCATCCAGGCAACAACCCGCG  
>HPV59\_Alpha\_557236\_nt3661\_Genome\_Tile|1  
GATTAAAGAAAAGTACACTGGTTATTTGAAAATATTTCTCTACCTGGCATTTGGACAGGAA  
>HPV59\_Alpha\_557236\_nt3721\_Genome\_Tile|1  
ACAGAGGATCAGCCAAAACAGGCATTTTAACATTAACATATACAAGCGAAACACAACGCA  
>HPV59\_Alpha\_557236\_nt3741\_Genome\_Tile|1  
GGCATTTTAACATTAACATATACAAGCGAAACACAACGCAATGAATTTTGTAGATACTGTA

>HPV59\_Alpha\_557236\_nt3781\_Genome\_Tile|1  
ATGAATTTTGTAGATACTGTAAAAATTCCTAATAGTGTACAAATACATGTTGGGTATATGA  
>HPV59\_Alpha\_557236\_nt3801\_Genome\_Tile|1  
AAAATTCCTAATAGTGTACAAATACATGTTGGGTATATGAGTGTGTAATGGTTGTTATGC  
>HPV59\_Alpha\_557236\_nt3821\_Genome\_Tile|1  
AATACATGTTGGGTATATGAGTGTGTAATGGTTGTTATGCAAATGTAACACAAGCCAATA  
>HPV59\_Alpha\_557236\_nt3981\_Genome\_Tile|1  
CTGTCTATATGTGTGCATATACATGGTTACTAGTATTTGTGTATATTGTGGTTATCACCT  
>HPV59\_Alpha\_557236\_nt4001\_Genome\_Tile|1  
ACATGGTTACTAGTATTTGTGTATATTGTGGTTATCACCTCCTCATATGAGTGTTTTTTA  
>HPV59\_Alpha\_557236\_nt4021\_Genome\_Tile|1  
GTATATTGTGGTTATCACCTCCTCATATGAGTGTTTTTTACTATATATATTGTTTTTTAT  
>HPV59\_Alpha\_557236\_nt4041\_Genome\_Tile|1  
CCTCATATGAGTGTTTTTTACTATATATATTGTTTTTTATAATTCCACTGTTACTACTAT  
>HPV59\_Alpha\_557236\_nt4061\_Genome\_Tile|1  
CTATATATATTGTTTTTTATAATTCCACTGTTACTACTATATGCCCATGCAATACTGTCC  
>HPV59\_Alpha\_557236\_nt4081\_Genome\_Tile|1  
AATTCCACTGTTACTACTATATGCCCATGCAATACTGTCCATACAATAATTGCTGTATAT  
>HPV59\_Alpha\_557236\_nt4101\_Genome\_Tile|1  
ATGCCCATGCAATACTGTCCATACAATAATTGCTGTATATTGTAAATTACATTGCACTGT  
>HPV59\_Alpha\_557236\_nt4121\_Genome\_Tile|1  
ATACAATAATTGCTGTATATTGTAAATTACATTGCACTGTATTGTACAGTATATTTTAAA  
>HPV59\_Alpha\_557236\_nt4421\_Genome\_Tile|1  
GTACCGGTGGCAGAACAGGGTACATACCTTTAGGGGGGCGTACAAACACTATAGTAGATG  
>HPV59\_Alpha\_557236\_nt4441\_Genome\_Tile|1  
TACATACCTTTAGGGGGGCGTACAAACACTATAGTAGATGTATCGCCTGCTAAACCACCA  
>HPV59\_Alpha\_557236\_nt4601\_Genome\_Tile|1  
GTACTTCAGGATTTGAAATATCTACCTCTAGTACAACAACACCAGCTGTTTTGGATATAA  
>HPV59\_Alpha\_557236\_nt4621\_Genome\_Tile|1  
TCTACCTCTAGTACAACAACACCAGCTGTTTTGGATATAACCCCAACCTCTTCTGTTCAA  
>HPV59\_Alpha\_557236\_nt4641\_Genome\_Tile|1  
ACCAGCTGTTTTGGATATAACCCCAACCTCTTCTGTTCAAATTAGTAGCTCTAGTTTTAT  
>HPV59\_Alpha\_557236\_nt4921\_Genome\_Tile|1  
CAACAAGTTCGGGTGTCTAACGCTGACTTTTTAACACGTCCATCCACATTTGTTACATAT  
>HPV59\_Alpha\_557236\_nt4981\_Genome\_Tile|1  
GATAACCTTGCTTATGATCCAATTGATACTACATTAACTTTTGACCCCTCATCAGAGGTT  
>HPV59\_Alpha\_557236\_nt5221\_Genome\_Tile|1  
ATTGAATTGCAACCTCTTGTCTTCTCCAGGCTGCTACTGATGATATATATGATATATAT  
>HPV59\_Alpha\_557236\_nt5241\_Genome\_Tile|1  
TTCTTCCAGGCTGCTACTGATGATATATATGATATATATGCAGATATTACAGATGAAGC  
>HPV59\_Alpha\_557236\_nt5281\_Genome\_Tile|1  
GCAGATATTACAGATGAAGCACCTACTAGTACTGCCAACACTGCATTTACAATTCCTAAA  
>HPV59\_Alpha\_557236\_nt5321\_Genome\_Tile|1  
CTGCATTTACAATTCCTAAATCTTCTTTCAAAGTTTGTTCATTAACACGGTCGGCATCTA  
>HPV59\_Alpha\_557236\_nt5341\_Genome\_Tile|1  
TCTTCTTTTCAAAGTTTGTTCATTAACACGGTCGGCATCTAGCACCTTTTCAAATGTAAC  
>HPV59\_Alpha\_557236\_nt5421\_Genome\_Tile|1  
GGATGTTCTGTAAATACAGGACCCGATATAGTTTTACCTAATACTAATATTGTTGAACC  
>HPV59\_Alpha\_557236\_nt5441\_Genome\_Tile|1  
GACCCGATATAGTTTTACCTAATACTAATATTGTTGAACCCACTTATTCTACTACACCCT  
>HPV59\_Alpha\_557236\_nt5461\_Genome\_Tile|1  
AATACTAATATTGTTGAACCCACTTATTCTACTACACCCTTTACCACCATACAGTCTATT  
>HPV59\_Alpha\_557236\_nt5481\_Genome\_Tile|1  
CACTTATTCTACTACACCCTTTACCACCATACAGTCTATTAATATAGAAGGCACAAATTA  
>HPV59\_Alpha\_557236\_nt5501\_Genome\_Tile|1

TTACCACCATACAGTCTATTAATATAGAAGGCACAAATTATTTTTTATGGCCTATATATT  
>HPV59\_Alpha\_557236\_nt7081\_Genome\_Tile|1  
CTCTACCCCATCACAAAACGTGTTAAGCGTCGCAAGTCTTCCAGAAAATAGTGTTGTTT  
>HPV59\_Alpha\_557236\_nt7161\_Genome\_Tile|1  
CATGTTGTATGTTTTGTATTGTTTGCCTGTTTGTATGTTGTGTATATGTACATGTTTGT  
>HPV59\_Alpha\_557236\_nt7301\_Genome\_Tile|1  
AAGGTACTGTCCCTTTATTGTTTCTTTGTCTTATTACACATTATTACACATTGCCCTAC  
>HPV59\_Alpha\_557236\_nt7321\_Genome\_Tile|1  
TTTCTTTGTCCCTATTACACATTATTACACATTGCCCTACTTACATAGGTGTGTTTGTTC  
>HPV59\_Alpha\_557236\_nt7341\_Genome\_Tile|1  
ATTATTACACATTGCCCTACTTACATAGGTGTGTTTGTTCCTTCATTTTGTCTGAATGT  
>HPV59\_Alpha\_557236\_nt7361\_Genome\_Tile|1  
TTACATAGGTGTGTTTGTTCCTTCATTTTGTCTGAATGTCCAGTTTTCATTTGCACAT  
>HPV59\_Alpha\_557236\_nt7401\_Genome\_Tile|1  
CCAGTTTTGCATTTGCACATTATATGGCGTCCATTTTATCCTTTAAATCCTCCATTTTGC  
>HPV59\_Alpha\_557236\_nt7501\_Genome\_Tile|1  
TTTGAACAATTAATCTGTTTAAACATCAGCAAAACAGTTAATCCCCATCTTGTTTCCTCC  
>HPV59\_Alpha\_557236\_nt7521\_Genome\_Tile|1  
AAACATCAGCAAAACAGTTAATCCCCATCTTGTTTCCTCCTACACGCCTAGACTACTAAC  
>HPV59\_Alpha\_557236\_nt7541\_Genome\_Tile|1  
ATCCCCATCTTGTTTCCTCCTACACGCCTAGACTACTAACACAACCTACAAACGCCAAAT  
>HPV59\_Alpha\_557236\_nt7701\_Genome\_Tile|1  
TTTTACTACTTTAATTGCATAATTGGCTTGCAAAACTACTGTGCAATCCAAGAATGTGTC  
>HPV59\_Alpha\_557236\_nt7721\_Genome\_Tile|1  
AATTGGCTTGCAAAACTACTGTGCAATCCAAGAATGTGTCTATAATTTATTGTAAAAAAC  
>HPV59\_Alpha\_557236\_nt7761\_Genome\_Tile|1  
TATAATTTATTGTAAAAAACATGACTAAGGTTTTTGTCTATTGTTAAGCAACCGAAAAAGG  
>HPV59\_Alpha\_557236\_nt7781\_Genome\_Tile|1  
ATGACTAAGGTTTTTGTCTATTGTTAAGCAACCGAAAAAGGTCGGGCAAGTACATGCACAC  
>HPV59\_Alpha\_557236\_nt7821\_Genome\_Tile|1  
TCGGGCAAGTACATGCACACTTTCTACTTATTACTTTTTTACAATCATAGTAATAAAAAAG  
>HPV56\_Alpha\_397053\_nt0201\_Genome\_Tile|1  
GTATATTGCAAAAAAGAACTAACACGTGCTGAGGTATATAATTTTGCATGCACTGAATTA  
>HPV56\_Alpha\_397053\_nt0221\_Genome\_Tile|1  
AACACGTGCTGAGGTATATAATTTTGCATGCACTGAATTAATAATTAGTGTATAGGGATGA  
>HPV56\_Alpha\_397053\_nt0241\_Genome\_Tile|1  
ATTTTGCATGCACTGAATTAATAATTAGTGTATAGGGATGATTTTCCTTATGCAGTGTGCA  
>HPV56\_Alpha\_397053\_nt1041\_Genome\_Tile|1  
ATTTATAGACGATTTCATATATACAAAATATACAGGCAGACGCAGAAACAGTCAACAATTG  
>HPV56\_Alpha\_397053\_nt1281\_Genome\_Tile|1  
GAAACACCAGAACAGGTAGATGAAGAGGTACAGGGACGTGGGTGCGGGAATACACAAAAT  
>HPV56\_Alpha\_397053\_nt1341\_Genome\_Tile|1  
GGAGGCTCACAAAACAGTACCTATAGTAACAATAGTGAGGACTCTGTAATACATATGGAT  
>HPV56\_Alpha\_397053\_nt1361\_Genome\_Tile|1  
CTATAGTAACAATAGTGAGGACTCTGTAATACATATGGATATTGATAGAAACAATGAAAC  
>HPV56\_Alpha\_397053\_nt2401\_Genome\_Tile|1  
CTAAACTTGGGTTGTTGGATGATGCAACAGAAATATGTTGGAAATATATAGACGATTATT  
>HPV56\_Alpha\_397053\_nt3161\_Genome\_Tile|1  
TACAATGGAGATTGTGGGTGGCAAAAAGTGTTCTGGGGTAGACTATAGAGGTATATAT  
>HPV56\_Alpha\_397053\_nt3541\_Genome\_Tile|1  
CACACACATCAGCGACACAGACAATACCGACAGTAGAAGTAGAAGTATCAACAACAACAA  
>HPV56\_Alpha\_397053\_nt3561\_Genome\_Tile|1  
ACAATACCGACAGTAGAAGTAGAAGTATCAACAACAACAACCACCCTGGTGATAAGACTA  
>HPV56\_Alpha\_397053\_nt3741\_Genome\_Tile|1  
ATAAAAAATTATAGCATAATTACAATTATATATAAGGATGAAACACAACGAAACAGCTTTT

>HPV56\_Alpha\_397053\_nt3781\_Genome\_Tile|1  
AACACAACGAAACAGCTTTTTTAAGTCATGTAAAAATTCCAGTAGTGACAGGTTAGTTTG  
>HPV56\_Alpha\_397053\_nt4101\_Genome\_Tile|1  
ACATCCTTTTTTAATACATTTATAATATTTTTTGATATTTTTTTACTGTCCTGTGCTGTGT  
>HPV56\_Alpha\_397053\_nt4661\_Genome\_Tile|1  
CTAGTACTGTACATGTCTAGTAGTACCCATATAACCAATCCGTTATTTATTGATCCCCCTG  
>HPV56\_Alpha\_397053\_nt6061\_Genome\_Tile|1  
GTGTATTGTTGGATGTACTCCCCTATGGGTGAACATTGGACTAAAGGTGCTGTGTGTAA  
>HPV56\_Alpha\_397053\_nt6081\_Genome\_Tile|1  
CCGCTATGGGTGAACATTGGACTAAAGGTGCTGTGTGTAAAGTCCACACAAGTTACCACAG  
>HPV56\_Alpha\_397053\_nt6381\_Genome\_Tile|1  
GGGCTGGTAAAGTTGGGGAAACAATACCTGCAGAGTTATATTTAAAGGGTAGCAATGGTA  
>HPV56\_Alpha\_397053\_nt6801\_Genome\_Tile|1  
TTGGGTTATCCCCGCCAGTGGCCACCAGCCTAGAAGATAAATATAGATATGTTAGAAGCA  
>HPV56\_Alpha\_397053\_nt7001\_Genome\_Tile|1  
CAACTGGGCACTAGGTCAAAGCCTGCTGTAGCTACCTCTAAAAAGCGATCTGCTCCTACC  
>HPV56\_Alpha\_397053\_nt7041\_Genome\_Tile|1  
AAAAGCGATCTGCTCCTACCTCCACCTCTACACCAGCAAACGTAAAAGGCGGTAGTGTG  
>HPV56\_Alpha\_397053\_nt7161\_Genome\_Tile|1  
CTTTATTTTATACTTTGTATGTGTATGTTGTGTTTGTGTAATGTTTGTGTGAAATGTTT  
>HPV56\_Alpha\_397053\_nt7321\_Genome\_Tile|1  
GGTGTGTCATTATTGTGGCTTTTGTTTTGTAAAGTTATTGTGTACAGTGTACTATGTGTAT  
>HPV56\_Alpha\_397053\_nt7381\_Genome\_Tile|1  
TGTGCATACATATATATACCATAACATACTCCATTTTGTGTTTTTCCGCCATTTTGTAC  
>HPV56\_Alpha\_397053\_nt7461\_Genome\_Tile|1  
ATGGCCTAGTGCCATTATTTAAACTAAAAGGAATTCGGTTGCATGGCCTAGTGCCATTAT  
>HPV56\_Alpha\_397053\_nt7481\_Genome\_Tile|1  
AAACTAAAAGGAATTCGGTTGCATGGCCTAGTGCCATTATTTAAACCAAAAAGGCCCTTTT  
>HPV56\_Alpha\_397053\_nt7581\_Genome\_Tile|1  
TGTTTTTATACTTGAATTATGTACAGTACCGCACCCCTGTATTACTCACAGGTACTATGACT  
>HPV56\_Alpha\_397053\_nt7741\_Genome\_Tile|1  
AGGCCAAGTATCTGTCAGTATCTGTTTTGCAAACATGTAACATAACAATTACTCATTTTTT  
>HPV52\_Alpha\_397038\_nt0061\_Genome\_Tile|1  
CGGTGTATATATATAGAACACAGTGTAGCTAACGCACGGCCATGTTTGAGGATCCAGCAA  
>HPV52\_Alpha\_397038\_nt0201\_Genome\_Tile|1  
AAAAAAGAGCTACAACGAAGAGAGGTATACAAGTTTCTATTTACAGATTTACGAATAGTA  
>HPV52\_Alpha\_397038\_nt0221\_Genome\_Tile|1  
AGAGGTATACAAGTTTCTATTTACAGATTTACGAATAGTATATAGAGACAATAATCCATA  
>HPV52\_Alpha\_397038\_nt0241\_Genome\_Tile|1  
TTACAGATTTACGAATAGTATATAGAGACAATAATCCATATGGCGTGTGTATTATGTGCC  
>HPV52\_Alpha\_397038\_nt0261\_Genome\_Tile|1  
TATAGAGACAATAATCCATATGGCGTGTGTATTATGTGCCTACGCTTTTTATCTAAGATA  
>HPV52\_Alpha\_397038\_nt0301\_Genome\_Tile|1  
TACGCTTTTTTATCTAAGATAAGTGAATATAGGCATTATCAATATTTCACTGTATGGGAAAA  
>HPV52\_Alpha\_397038\_nt0321\_Genome\_Tile|1  
AGTGAATATAGGCATTATCAATATTTCACTGTATGGGAAAACATTAGAAGAGAGGGTAAAA  
>HPV52\_Alpha\_397038\_nt0341\_Genome\_Tile|1  
ATATTTCACTGTATGGGAAAACATTAGAAGAGAGGGTAAAAAACCATTAAGTGAAATAAC  
>HPV52\_Alpha\_397038\_nt0381\_Genome\_Tile|1  
AAACCATTAAGTGAAATAACTATTAGATGTATAATTTGTCAAACGCCATTATGTCCTGAA  
>HPV52\_Alpha\_397038\_nt0421\_Genome\_Tile|1  
AAACGCCATTATGTCCTGAAGAAAAAGAAAGACATGTTAATGCAAACAAGCGATTTTCATA  
>HPV52\_Alpha\_397038\_nt0521\_Genome\_Tile|1  
GAGACCCCGACCTGTGACCCAAGTGTAACGTCATGCGTGGAGACAAAGCAACTATAAAAG  
>HPV52\_Alpha\_397038\_nt0701\_Genome\_Tile|1

CCACAAGCAATTACTACATTGTGACATATTGTGCACAGTTGTGATAGCACACTACGGCTAT  
>HPV52\_Alpha\_397038\_nt0721\_Genome\_Tile|1  
GTGACATATTGTGCACAGTTGTGATAGCACACTACGGCTATGCATTCATAGCACTGCGACG  
>HPV52\_Alpha\_397038\_nt0741\_Genome\_Tile|1  
TGATAGCACACTACGGCTATGCATTCATAGCACTGCGACGGACCTTCGTACTCTACAGCA  
>HPV52\_Alpha\_397038\_nt1121\_Genome\_Tile|1  
ACGAAAGTTTACAAGCAGTCCGGAAGTGCTGGCAAGATGGTGTAGAAAAACATGGTAG  
>HPV52\_Alpha\_397038\_nt1141\_Genome\_Tile|1  
CGGAAAGTGCTGGGCAAGATGGTGTAGAAAAACATGGTAGTCCGCGTGCAAAACACATTT  
>HPV52\_Alpha\_397038\_nt1161\_Genome\_Tile|1  
GGTGTAGAAAAACATGGTAGTCCGCGTGCAAAACACATTTGTGTAAATACAGAGTGTGTT  
>HPV52\_Alpha\_397038\_nt1181\_Genome\_Tile|1  
TCCGCGTGCAAAACACATTTGTGTAAATACAGAGTGTGTTTTACCAAAACGCAAACCATG  
>HPV52\_Alpha\_397038\_nt1321\_Genome\_Tile|1  
ACTGGCAAAGTAACAGTAGTCAATCAAGTGGGGTGGGGGCTAGTAATTCAGATGTAAGTT  
>HPV52\_Alpha\_397038\_nt1341\_Genome\_Tile|1  
CAATCAAGTGGGGTGGGGGCTAGTAATTCAGATGTAAGTTGTACTAGTATAGAGGACAAT  
>HPV52\_Alpha\_397038\_nt1361\_Genome\_Tile|1  
TAGTAATTCAGATGTAAGTTGTACTAGTATAGAGGACAATGAGGAAAATAGTAATAGAAC  
>HPV52\_Alpha\_397038\_nt1381\_Genome\_Tile|1  
GTACTAGTATAGAGGACAATGAGGAAAATAGTAATAGAACGCTAAAAAGCATACAAAATA  
>HPV52\_Alpha\_397038\_nt1401\_Genome\_Tile|1  
GAGGAAAATAGTAATAGAACGCTAAAAAGCATACAAAATATTATGTGCGAAAATAGCATA  
>HPV52\_Alpha\_397038\_nt1421\_Genome\_Tile|1  
GCTAAAAAGCATACAAAATATTATGTGCGAAAATAGCATAAAAAACAACGTATTATTTAA  
>HPV52\_Alpha\_397038\_nt1441\_Genome\_Tile|1  
TTATGTGCGAAAATAGCATAAAAAACAACGTATTATTTAAATTTAAAGAAACATATGGTG  
>HPV52\_Alpha\_397038\_nt1461\_Genome\_Tile|1  
AAAACAACGTATTATTTAAATTTAAAGAAACATATGGTGTTAGCTTTATGGAATTAGTA  
>HPV52\_Alpha\_397038\_nt1561\_Genome\_Tile|1  
GTATTATAGGAATGGGAGTAACACCATCAGTTGCAGAAGGATTAAAAGTATTAATACAGC  
>HPV52\_Alpha\_397038\_nt2561\_Genome\_Tile|1  
AGGAACAGATCCTAGGTGGCCATATTTACATAGTAGATTGGTTGTGTTTCATTTCAAAAA  
>HPV52\_Alpha\_397038\_nt2841\_Genome\_Tile|1  
GAAATTGACTCGAATGGAATGTGTTTTGTTTTACAAAGCAAAGGAACTGGGAATAACTCA  
>HPV52\_Alpha\_397038\_nt2981\_Genome\_Tile|1  
AGGCATTAAACAAAACACAATATAGCACAGATGGATGGACATTACAACAAACAAGTCTAG  
>HPV52\_Alpha\_397038\_nt3041\_Genome\_Tile|1  
AAATGTGGCGTGCGAACCACAAAAATACTTTAAAAAACATGGGTATACAATAACAGTGC  
>HPV52\_Alpha\_397038\_nt3061\_Genome\_Tile|1  
CAAAAATACTTTAAAAAACATGGGTATACAATAACAGTGCAATACGATAATGATAAAAAAC  
>HPV52\_Alpha\_397038\_nt3101\_Genome\_Tile|1  
AATACGATAATGATAAAAAACAATACTATGGATTATACAAACTGGAAGGAAATTTATTTAC  
>HPV52\_Alpha\_397038\_nt3121\_Genome\_Tile|1  
AATACTATGGATTATACAAACTGGAAGGAAATTTATTTACTTGGTGAGTGTGAATGTACA  
>HPV52\_Alpha\_397038\_nt3141\_Genome\_Tile|1  
CTGGAAGGAAATTTATTTACTTGGTGAGTGTGAATGTACAATTGTAGAAGGACAAGTAGA  
>HPV52\_Alpha\_397038\_nt3161\_Genome\_Tile|1  
TTGGTGAGTGTGAATGTACAATTGTAGAAGGACAAGTAGATTACTATGGGTTATATTATT  
>HPV52\_Alpha\_397038\_nt3181\_Genome\_Tile|1  
ATTGTAGAAGGACAAGTAGATTACTATGGGTTATATTATTGGTGTGATGGAGAAAAATA  
>HPV52\_Alpha\_397038\_nt3241\_Genome\_Tile|1  
TATTTTGTAAAAATTTAGTAACGATGCAAAGCAATATTGTGTAACAGGAGTATGGGAAGTA  
>HPV52\_Alpha\_397038\_nt3361\_Genome\_Tile|1  
ACTGAAACTGCTGTCCACCTATGCACCGAAACCTCCAAGACCTCCGCAGTGTCCGTGGGT

>HPV52\_Alpha\_397038\_nt3401\_Genome\_Tile|1  
CCTCCGCAGTGTCCGTGGGTGCCAAAGACACACACCTACAACCACCACAGAAACGACGAC  
>HPV52\_Alpha\_397038\_nt3481\_Genome\_Tile|1  
AGAAACACCAAGTACCCCAACAACCTTTTGC GGGGACAACAATCCGTGGACAGTACTACA  
>HPV52\_Alpha\_397038\_nt3541\_Genome\_Tile|1  
CGGGGACTCGTCACTGCAACTGAGTGCACAAACAAAGGACGGGTTGCACATACAACCTTGT  
>HPV52\_Alpha\_397038\_nt3581\_Genome\_Tile|1  
GGGTTGCACATACAACCTTGTACTGCACCTATAATACACCTAAAAGGTGATCCTAATAGTT  
>HPV52\_Alpha\_397038\_nt3801\_Genome\_Tile|1  
TAAATATACCAAATACTGTGCAAGTTATACAAGGTGTCATGTCATTGTGATATTTGTACAT  
>HPV52\_Alpha\_397038\_nt3961\_Genome\_Tile|1  
TTTTTGCTTATGGTGT TTTGTG CAGTGCTTAGGCCGCTCTTGCTATCTATATCGGTGTATG  
>HPV52\_Alpha\_397038\_nt4041\_Genome\_Tile|1  
CTTTTGCTATGGGTATCTATTGGGTCACCATTTAAAGTGTTTTTTTTGTACCTACTGTTT  
>HPV52\_Alpha\_397038\_nt4101\_Genome\_Tile|1  
TTATATTTTCCAATGTTTTGTATTCACTGTCATGCACAGTATTTGGCACAACCTGCAATAA  
>HPV52\_Alpha\_397038\_nt4121\_Genome\_Tile|1  
TATTCACCTGTCATGCACAGTATTTGGCACAACCTGCAATAACTGTACATGTAGATTGGCTA  
>HPV52\_Alpha\_397038\_nt4161\_Genome\_Tile|1  
CTGTACATGTAGATTGGCTACATGCATATATGCAAAATATACTTTTTTCACTTTTGTAGTT  
>HPV52\_Alpha\_397038\_nt4181\_Genome\_Tile|1  
CATGCATATATGCAAAATATACTTTTTTCACTTTTGTAGTTTGTCTAATAAAATACTTTTTAT  
>HPV52\_Alpha\_397038\_nt4241\_Genome\_Tile|1  
ATTTTTTTAATAGCTTGTGTCGAATGAGATACAGACGGTCTACACGGCACAAACGTGCTTCT  
>HPV52\_Alpha\_397038\_nt4481\_Genome\_Tile|1  
TTGTCCACTCGTCCTCCCACTAGTAGTATTACCACGTCCACCATTTCGTCCCCCTGTAACCT  
>HPV52\_Alpha\_397038\_nt4501\_Genome\_Tile|1  
TAGTAGTATTACCACGTCCACCATTTCGTCCCCCTGTAACCTGTAGAACCCATTGGTCCCTT  
>HPV52\_Alpha\_397038\_nt4521\_Genome\_Tile|1  
CCATTTCGTCCCCCTGTAACCTGTAGAACCCATTGGTCCCTTAGAACCATCTATAGTTTCTA  
>HPV52\_Alpha\_397038\_nt4541\_Genome\_Tile|1  
GTAGAACCCATTGGTCCCTTAGAACCATCTATAGTTTCTATGATAGAAGAAACAACATTT  
>HPV52\_Alpha\_397038\_nt4761\_Genome\_Tile|1  
CTATAATACAGCCCCCGGCACCTGCAGAAGCATCTGGTCATGTATTGTTTCTAGTCCAA  
>HPV52\_Alpha\_397038\_nt4781\_Genome\_Tile|1  
CCTGCAGAAGCATCTGGTCATGTATTGTTTCTAGTCCAACCTATTAGTACACACACCTAT  
>HPV52\_Alpha\_397038\_nt4841\_Genome\_Tile|1  
GAAGAAATCCCTATGGATACATTTGTACCTCTACTGACAGCAGCAGTGTAACAAGTAGT  
>HPV52\_Alpha\_397038\_nt4961\_Genome\_Tile|1  
CAGGTTAAGGTAGTCGACCCTGCTTTTATGTCATCACCACAGAAATTAGTAACATATAAC  
>HPV52\_Alpha\_397038\_nt4981\_Genome\_Tile|1  
TGCTTTTATGTCATCACCACAGAAATTAGTAACATATAACAATCCTGTTTTTGAGGGCGT  
>HPV52\_Alpha\_397038\_nt5001\_Genome\_Tile|1  
AGAAATTAGTAACATATAACAATCCTGTTTTTGAGGGCGTTGATACAGATGAAACTATAA  
>HPV52\_Alpha\_397038\_nt5021\_Genome\_Tile|1  
AATCCTGTTTTTGAGGGCGTTGATACAGATGAACTATAATTTTTGATCGTTCACAACCTT  
>HPV52\_Alpha\_397038\_nt5241\_Genome\_Tile|1  
ATATTAGTCCTATCCAGCCTGCTGAAGTTCAGGAAGACATAGAATTGCAACCTTTATTAC  
>HPV52\_Alpha\_397038\_nt5261\_Genome\_Tile|1  
GCTGAAGTTCAGGAAGACATAGAATTGCAACCTTTATTACCACAGTCTGTGTCCCCTTAC  
>HPV52\_Alpha\_397038\_nt5281\_Genome\_Tile|1  
AGAATTGCAACCTTTATTACCACAGTCTGTGTCCCCTTACACTATTAATGATGGTTTGTA  
>HPV52\_Alpha\_397038\_nt5301\_Genome\_Tile|1  
CACAGTCTGTGTCCCCTTACACTATTAATGATGGTTTGTATGATGTGTATGCAGATTCTT  
>HPV52\_Alpha\_397038\_nt5341\_Genome\_Tile|1

TGATGTGTATGCAGATTCTTTGCAGCAACCCACGTTTCACTTACCTTCCACACTTTCTAC  
>HPV52\_Alpha\_397038\_nt5381\_Genome\_Tile|1  
TTACCTTCCACACTTTCTACCCATAATAATACTTTCACTGTACCTATTAATAGTGGTATT  
>HPV52\_Alpha\_397038\_nt5401\_Genome\_Tile|1  
CCATAATAATACTTTCACTGTACCTATTAATAGTGGTATTGACTTTGTATATCAACCCAC  
>HPV52\_Alpha\_397038\_nt5421\_Genome\_Tile|1  
TACCTATTAATAGTGGTATTGACTTTGTATATCAACCCACTATGTCCATTGAGTCAGGTC  
>HPV52\_Alpha\_397038\_nt5441\_Genome\_Tile|1  
GACTTTGTATATCAACCCACTATGTCCATTGAGTCAGGTCCTGACATTCCATTACCTTCG  
>HPV52\_Alpha\_397038\_nt5461\_Genome\_Tile|1  
TATGTCCATTGAGTCAGGTCCTGACATTCCATTACCTTCGTTACCCACACATACTCCTTT  
>HPV52\_Alpha\_397038\_nt5501\_Genome\_Tile|1  
TTACCCACACATACTCCTTTTGTTCCTATAGCCCCTACAGCTCCATCTACATCTATTATT  
>HPV52\_Alpha\_397038\_nt5521\_Genome\_Tile|1  
TGTTCCCTATAGCCCCTACAGCTCCATCTACATCTATTATTGTTGATGGTACAGATTTTAT  
>HPV52\_Alpha\_397038\_nt5761\_Genome\_Tile|1  
CTCGATTACTAACAGTAGGACATCCCTATTTTCTATTAAAAACACCAGTAGTGGTAATG  
>HPV52\_Alpha\_397038\_nt5781\_Genome\_Tile|1  
CATCCCTATTTTCTATTAAAAACACCAGTAGTGGTAATGGTAAAAAAGTTTGTAGTTCCC  
>HPV52\_Alpha\_397038\_nt5801\_Genome\_Tile|1  
AAACACCAGTAGTGGTAATGGTAAAAAAGTTTGTAGTTCCCAAGGTGTCTGGCCTGCAATA  
>HPV52\_Alpha\_397038\_nt6161\_Genome\_Tile|1  
TAAGGGAACCCCTTGTAAATAATAATTCAGGAAATCCTGGGGATTGTCCCTCCCCTACAGCT  
>HPV52\_Alpha\_397038\_nt6461\_Genome\_Tile|1  
TGTGCCAGGTGATTTATATATACAAGGGTCTAACTCTGGCAATACTGCCACTGTACAAAG  
>HPV52\_Alpha\_397038\_nt6781\_Genome\_Tile|1  
TTCAATTGTGCAAAATTACATTAACAGCTGATGTTATGACATACATTATAAGATGGATG  
>HPV52\_Alpha\_397038\_nt7041\_Genome\_Tile|1  
CCTTTAGGTAGGAAGTTTTTGTTCAGGCAGGGCTACAGGCTAGGCCCAAACATAAAACGC  
>HPV52\_Alpha\_397038\_nt7081\_Genome\_Tile|1  
CTAGGCCCAAACATAAAACGCCCTGCATCATCGGCCCCACGTACCTCCACAAAGAAGAAAA  
>HPV52\_Alpha\_397038\_nt7101\_Genome\_Tile|1  
CCTGCATCATCGGCCCCACGTACCTCCACAAAGAAGAAAAAGGTTAAAGGTAACCATTG  
>HPV52\_Alpha\_397038\_nt7121\_Genome\_Tile|1  
TACCTCCACAAAGAAGAAAAAGGTTAAAGGTAACCATTGTCTGTTGGGTAATTGTCTGT  
>HPV52\_Alpha\_397038\_nt7161\_Genome\_Tile|1  
TCTGTTGGGTAAATTGTCTGTGTGCATGTATGTGTTGTGTATGTCAAACACAGGTTAAAGG  
>HPV52\_Alpha\_397038\_nt7201\_Genome\_Tile|1  
GTCAAACACAGGTTAAAGGTAACCATTGTTTGTATGTAATTGTTTTGTGTGTGTACTG  
>HPV52\_Alpha\_397038\_nt7221\_Genome\_Tile|1  
TAACCATTGTTTGTATGTAATTGTTTGTGTGTGTACTGTGTTGTTTGCATGTTATGTA  
>HPV52\_Alpha\_397038\_nt7321\_Genome\_Tile|1  
ATGTTTTGTGTATGTATTAATAAAGTACTGTATTTACTAAACTATTTATAGTAGTCTTAT  
>HPV52\_Alpha\_397038\_nt7341\_Genome\_Tile|1  
TAAAGTACTGTATTTACTAAACTATTTATAGTAGTCTTATGTTATGTTATGGTTGCACCC  
>HPV52\_Alpha\_397038\_nt7361\_Genome\_Tile|1  
ACTATTTATAGTAGTCTTATGTTATGTTATGGTTGCACCCACATGAGTAACAATACAGTT  
>HPV52\_Alpha\_397038\_nt7401\_Genome\_Tile|1  
ACATGAGTAACAATACAGTTGCTCCTAATCTATTGCATCTCCTGCCCTACCCTGTGTCCC  
>HPV52\_Alpha\_397038\_nt7441\_Genome\_Tile|1  
CCTGCCCTACCCTGTGTCCCCTGCCCTACCCTGTGTCTACTTTGTTACACTACTAATTA  
>HPV52\_Alpha\_397038\_nt7461\_Genome\_Tile|1  
CTGCCCTACCCTGTGTCTACTTTGTTACACTACTAATTAGCCTTATACTCTCCATTTTG  
>HPV52\_Alpha\_397038\_nt7481\_Genome\_Tile|1  
CTTTGTTACACTACTAATTAGCCTTATACTCTCCATTTTGTACCATTTTGTACTATCCAC



>HPV52\_Alpha\_397038\_nt7501\_Genome\_Tile|1  
GCCTTATACTCTCCATTTTGTACCATTTTGTACTATCCACCATTTTAAATCCTAACCGAA  
>HPV52\_Alpha\_397038\_nt7621\_Genome\_Tile|1  
AGTTTCAGCAAACCTGCTTAATCCTTTGGTTTCCTGCAGTCCACTGGTCTACACTTGTGT  
>HPV52\_Alpha\_397038\_nt7641\_Genome\_Tile|1  
TCCTTTGGTTTCCTGCAGTCCACTGGTCTACACTTGTGTGCCGCCTAAACTGACTTCTT  
>HPV52\_Alpha\_397038\_nt7681\_Genome\_Tile|1  
CCCGCCTAAACTGACTTCTTGCTGACTCACAGGTCCTGCAGTGCAGCTAAACAATACATT  
>HPV52\_Alpha\_397038\_nt7781\_Genome\_Tile|1  
TTTATTTAAACTTTCAATGCTAATTACAGTGTGGCTTACACAAGTACATCCTACGCC  
>HPV52\_Alpha\_397038\_nt7801\_Genome\_Tile|1  
ACTAATTACAGTGTTGGCTTACACAAGTACATCCTACGCCAAATATGTCTTGTAACAT  
>HPV52\_Alpha\_397038\_nt7821\_Genome\_Tile|1  
ACACAAGTACATCCTACGCCAAATATGTCTTGTAACATGATTAAATACTGTACTCAC  
>HPV52\_Alpha\_397038\_nt7861\_Genome\_Tile|1  
GATTAAATACTGTTACTCACCAGGTGTGCACTACACGACCGGTTACGGTTACCGTACCCA  
>HPV52\_Alpha\_397038\_nt7881\_Genome\_Tile|1  
CAGGTGTGCACTACACGACCGGTTACGGTTACCGTACCCACAACCACTTTTTTTTATAAT  
>HPV45\_Alpha\_397022\_nt0161\_Genome\_Tile|1  
ATTGAATACATCACTACAAGACGTATCTATTGCCTGTGTATATTGCAAAGCAACATTGGA  
>HPV45\_Alpha\_397022\_nt0341\_Genome\_Tile|1  
TTATTCAAACCTCTGTATATGGAGAGACACTGGAAAAATACTAATACAGAGTTGTATAA  
>HPV45\_Alpha\_397022\_nt1421\_Genome\_Tile|1  
GATAGTAGTGACAATGCAGAAAATGTAGATCCGCATTGCAGTATTACAGAACTAAAGGAG  
>HPV45\_Alpha\_397022\_nt1441\_Genome\_Tile|1  
AAATGTAGATCCGCATTGCAGTATTACAGAACTAAAGGAGCTATTACAAGCAAGTAACAA  
>HPV45\_Alpha\_397022\_nt3101\_Genome\_Tile|1  
ACCGTCGCAGTGTTTTTAAAAAAGGCGGTAAACCGTGCACGTATACTTTGATGGCAACAA  
>HPV45\_Alpha\_397022\_nt3121\_Genome\_Tile|1  
AAGGCGGTAAAACCGTGCACGTATACTTTGATGGCAACAAGGACAACCTGTATGAACATG  
>HPV45\_Alpha\_397022\_nt3201\_Genome\_Tile|1  
TATATAACTGAGACAGGGATATGGGACAAAACAGCAGCATGTGTTAGCTATTGGGGTGTA  
>HPV45\_Alpha\_397022\_nt3221\_Genome\_Tile|1  
ATGGGACAAAACAGCAGCATGTGTTAGCTATTGGGGTGTATATTATATAAAAGATGGAGA  
>HPV45\_Alpha\_397022\_nt3241\_Genome\_Tile|1  
GTGTTAGCTATTGGGGTGTATATTATATAAAAGATGGAGATACCACATATTATGTACAAT  
>HPV45\_Alpha\_397022\_nt3261\_Genome\_Tile|1  
TATTATATAAAAGATGGAGATACCACATATTATGTACAATTTAAAAGCGAATGTGAGAAA  
>HPV45\_Alpha\_397022\_nt3281\_Genome\_Tile|1  
TACCACATATTATGTACAATTTAAAAGCGAATGTGAGAAATATGGAAATAGTAATACGTG  
>HPV45\_Alpha\_397022\_nt3781\_Genome\_Tile|1  
TAACATATAATAGTGAGGTACAAAGAAATACCTTTTTGGATGTAGTTACTATTCCTAACA  
>HPV45\_Alpha\_397022\_nt3861\_Genome\_Tile|1  
TACATGACTATATGAATCTGTATATTGTATACAGTATGTAACATTACTATGCTATCTTTA  
>HPV45\_Alpha\_397022\_nt4001\_Genome\_Tile|1  
TGCTTGGTTGTTGGTGTTCCTTTTATAGTTGTTATTACATCCCCATTAACAGCATTTCG  
>HPV45\_Alpha\_397022\_nt4021\_Genome\_Tile|1  
TTTTTATAGTTGTTATTACATCCCCATTAACAGCATTTCGCTGTATACATTTGTTGCTATT  
>HPV45\_Alpha\_397022\_nt4041\_Genome\_Tile|1  
TCCCCATTAACAGCATTTCGCTGTATACATTTGTTGCTATTTACTACCTATGTTTGTATTA  
>HPV45\_Alpha\_397022\_nt4061\_Genome\_Tile|1  
TGTATACATTTGTTGCTATTTACTACCTATGTTTGTATTACATATGCATGCTTTACACAC  
>HPV45\_Alpha\_397022\_nt4081\_Genome\_Tile|1  
TACTACCTATGTTTGTATTACATATGCATGCTTTACACACCATAACAATAATTACTATAAT  
>HPV45\_Alpha\_397022\_nt4101\_Genome\_Tile|1

CATATGCATGCTTTACACACCATAACAATAATTACTATAATGTACAGTACAGTGTAACATA  
>HPV45\_Alpha\_397022\_nt4181\_Genome\_Tile|1  
GTATTTTTGTATTTTTGTATTTTTGTATTTTTGTATTTTTATATGTTTAATAAACCATGGT  
>HPV45\_Alpha\_397022\_nt5001\_Genome\_Tile|1  
TATGAGCCCCCTGGACACCACACTATCCTTTGAGCCTACCAGTAATGTTCCCTGATTCCGAT  
>HPV45\_Alpha\_397022\_nt5261\_Genome\_Tile|1  
TGATAGTGACCTGTTTGATGTATATGCAGACTTCCCACCTCCTGCGTCCACTACACCTAG  
>HPV45\_Alpha\_397022\_nt5281\_Genome\_Tile|1  
TATATGCAGACTTCCCACCTCCTGCGTCCACTACACCTAGCACTATACACAAATCATTTA  
>HPV45\_Alpha\_397022\_nt5301\_Genome\_Tile|1  
CCTGCGTCCACTACACCTAGCACTATACACAAATCATTTACATATCCAAAGTATTCCTTG  
>HPV45\_Alpha\_397022\_nt5341\_Genome\_Tile|1  
CATATCCAAAGTATTCCTTGACCATGCCTTCTACTGCTGCATCCTCTTACAGTAATGTTA  
>HPV45\_Alpha\_397022\_nt5381\_Genome\_Tile|1  
ATCCTCTTACAGTAATGTTACAGTACCATTAACATCTGCATGGGATGTACCTATATATAC  
>HPV45\_Alpha\_397022\_nt5421\_Genome\_Tile|1  
TGGGATGTACCTATATATACTGGCCCCGACATTATATTGCCATCCCATACTCCTATGTGG  
>HPV45\_Alpha\_397022\_nt5441\_Genome\_Tile|1  
TGGCCCGGACATTATATTGCCATCCCATACTCCTATGTGGCCTAGTACATCTCCTACCAA  
>HPV45\_Alpha\_397022\_nt5461\_Genome\_Tile|1  
CATCCCATACTCCTATGTGGCCTAGTACATCTCCTACCAATGCTTCCACCACCACCTATA  
>HPV45\_Alpha\_397022\_nt5481\_Genome\_Tile|1  
CCTAGTACATCTCCTACCAATGCTTCCACCACCACCTATATAGGTATTCATGGCACACAA  
>HPV45\_Alpha\_397022\_nt5521\_Genome\_Tile|1  
TAGGTATTCATGGCACACAATATTATTTATGGCCATGGTATTATTATTTTCCTAAAAAAC  
>HPV45\_Alpha\_397022\_nt5761\_Genome\_Tile|1  
GTTGTACCTAATGGTGCAGGTAATAAACAGGCTGTTCCCTAAGGTATCCGCATATCAGTAT  
>HPV45\_Alpha\_397022\_nt6941\_Genome\_Tile|1  
ATGATAAATTAAAGTTTTGGACTGTTGACCTAAAGGAAAAATTTTCCTCCGATTTGGATC  
>HPV45\_Alpha\_397022\_nt7161\_Genome\_Tile|1  
ATATATGTATGTTTGTATGTATGGTTTTGTATGTTGTATGTATGTATGTATTTGTGTGAT  
>HPV45\_Alpha\_397022\_nt7181\_Genome\_Tile|1  
ATGGTTTTGTATGTTGTATGTATGTATGTATTTGTGTGATATATTACTGTATTTTGTTTG  
>HPV45\_Alpha\_397022\_nt7241\_Genome\_Tile|1  
TTTGCGTGCCTGTATGTATGAATGTGCCTTGTGGCATGTATGGTGTACTGTACATAATT  
>HPV45\_Alpha\_397022\_nt7281\_Genome\_Tile|1  
TGGTGTACTGTACATAATTGTGGTATTAAATAAAGTATGCTAATAGTGTGTGTAGGGT  
>HPV45\_Alpha\_397022\_nt7301\_Genome\_Tile|1  
GTGGTATTAAATAAAGTATGCTAATAGTGTGTGTAGGGTGCACCCCTGTGAGTAACAA  
>HPV45\_Alpha\_397022\_nt7341\_Genome\_Tile|1  
TGCACCCCTGTGAGTAACAATACTATTTGTGTGTATGTGTATTGCTTTGTACCCTATATT  
>HPV45\_Alpha\_397022\_nt7361\_Genome\_Tile|1  
TACTATTTGTGTGTATGTGTATTGCTTTGTACCCTATATTCTTTCCTGTATTTCAAGTTA  
>HPV45\_Alpha\_397022\_nt7481\_Genome\_Tile|1  
GATTTTCGGTTGCCGTGGCTTATATGTGACCTTTTAAACATAATACCTAAACTGGCACAT  
>HPV45\_Alpha\_397022\_nt7501\_Genome\_Tile|1  
TATATGTGACCTTTTAAACATAATACCTAAACTGGCACATTTACAACCCCTACATAGTTT  
>HPV45\_Alpha\_397022\_nt7741\_Genome\_Tile|1  
ACCACCTTCTTATCCAACAATCTGTCTACTTGTTACATAAACTATAAACTGACTCACTTA  
>HPV40\_Alpha\_397014\_nt0181\_Genome\_Tile|1  
AAATTGATTGTGTGTTTTGCAAGACGGTCCATAAAACAGCTGAGGTACTGGCCTTTGCCT  
>HPV40\_Alpha\_397014\_nt0301\_Genome\_Tile|1  
TGGACCTGCACGAAAAGTAAACCAATACAGAACTTTAGATACGCAGCCTATGCACCAA  
>HPV40\_Alpha\_397014\_nt0721\_Genome\_Tile|1  
TAAAGTAGTAACTCGGTGTGTATTTTGTCACTGTTTGGTGCCTTAGCAGTGCATTGTTT

>HPV40\_Alpha\_397014\_nt0741\_Genome\_Tile|1  
TATTTTGTCTAGTGTGGTGGCGCTTAGCAGTGCATTGTTCCATCACTGATATAACACAGT  
>HPV40\_Alpha\_397014\_nt0921\_Genome\_Tile|1  
TGTTAGTAGAAGCTGTAGTGGATAAACAAACGGGGGATGCTGTATCGGAAGATGAGGATGA  
>HPV40\_Alpha\_397014\_nt1001\_Genome\_Tile|1  
GATTTGATATGATAGATTTTATTGATAATAGTGTGTGGCAGAGGAACATGTAGAACTAA  
>HPV40\_Alpha\_397014\_nt1341\_Genome\_Tile|1  
GGAAGATACCGTGGGGGGTAGTGGGAGGGTGACCACAGATGAGGCGGAAGCAGTAGAGGT  
>HPV40\_Alpha\_397014\_nt1401\_Genome\_Tile|1  
TGTGGAAGACGGCAGTCATGTTATAGACCACTGTAGTCCGCGCACACAACCTAATAGAGCT  
>HPV40\_Alpha\_397014\_nt1481\_Genome\_Tile|1  
ATGCTAAGCTGTATGGTAAGTTTAAAGAGCTTTATGGAGTGGGGTTTGGAGACCTGGTAA  
>HPV40\_Alpha\_397014\_nt1581\_Genome\_Tile|1  
GTATGCTGTGTTCGGGGTTAATCCACCATAGCCGAGGGCTTTCATACACTGCTGAAAAG  
>HPV40\_Alpha\_397014\_nt1621\_Genome\_Tile|1  
TTTCATACACTGCTGAAAAGGCAGGCATTATATTTACATACCCAATGGACGTCATGCAAA  
>HPV40\_Alpha\_397014\_nt1741\_Genome\_Tile|1  
GTTAGACAGCTATCCAAAATGTTAAATGTACCTGACAACCAGATACTGGTACAACCGCCT  
>HPV40\_Alpha\_397014\_nt2521\_Genome\_Tile|1  
AAACCGTTAGCAGTAATTAAGTGCCCTCCGTTACTGTTAACGTCCAATATAAATATAACA  
>HPV40\_Alpha\_397014\_nt2561\_Genome\_Tile|1  
CGTCCAATATAAATATAACACAGGACAGTAAGTACCAATATTTACAAAGTAGGGTTCAAG  
>HPV40\_Alpha\_397014\_nt3321\_Genome\_Tile|1  
CACACGTTATATGTTCTCCTAGTACTATCGAGGAACACGGAATACCCATTGTTGAGACTG  
>HPV40\_Alpha\_397014\_nt3341\_Genome\_Tile|1  
AGTACTATCGAGGAACACGGAATACCCATTGTTGAGACTGCTGACGCCAGACCCCCGACC  
>HPV40\_Alpha\_397014\_nt3481\_Genome\_Tile|1  
ACGAAGAAACGGACACCTGCCCATCACCACTACTGTGGGCAAATCACTCGGAGGAGAGTA  
>HPV40\_Alpha\_397014\_nt3501\_Genome\_Tile|1  
CCATCACCACTACTGTGGGCAAATCACTCGGAGGAGAGTACGTGGACACTGCAGACAGAA  
>HPV40\_Alpha\_397014\_nt3661\_Genome\_Tile|1  
GTGTTTTAGATATAGACTAGGAAAAGTGTACATTTATTTTGTAAATTCCTCAACTACATG  
>HPV40\_Alpha\_397014\_nt3681\_Genome\_Tile|1  
GAAAAGTGTACATTTATTTTGTAAATTCCTCAACTACATGGAGGTGGACCACTGAATCCA  
>HPV40\_Alpha\_397014\_nt3801\_Genome\_Tile|1  
TCTTAGCTATTGTAAAAATACCAAAAACAATAAAACATAGCTTGGGTATGTTAACTACTGA  
>HPV40\_Alpha\_397014\_nt3821\_Genome\_Tile|1  
CCAAAAACAATAAAACATAGCTTGGGTATGTTAACTACTGATGTAATATATGTATATATGT  
>HPV40\_Alpha\_397014\_nt3861\_Genome\_Tile|1  
TGTAATATATGTATATATGTATATATATGGAACACCATCTGTGAAGGGTATTGTCTAGCA  
>HPV40\_Alpha\_397014\_nt3961\_Genome\_Tile|1  
TAGAGTCTACGCTTGGCATACTAGTAGTCTATATTGTTTTTTTACTTATTGCACTGTTGA  
>HPV40\_Alpha\_397014\_nt3981\_Genome\_Tile|1  
CTAGTAGTCTATATTGTTTTTTTACTTATTGCACTGTTGATCTGTGTGTGTGTCCCTAAT  
>HPV40\_Alpha\_397014\_nt4001\_Genome\_Tile|1  
TTTACTTATTGCACTGTTGATCTGTGTGTGTGTCCCTAATCTGTATGTGTGGAGCTCTAT  
>HPV40\_Alpha\_397014\_nt4021\_Genome\_Tile|1  
TCTGTGTGTGTGTCCCTAATCTGTATGTGTGGAGCTCTATACTGTCTGCTATCTCCATTT  
>HPV40\_Alpha\_397014\_nt4041\_Genome\_Tile|1  
CTGTATGTGTGGAGCTCTATACTGTCTGCTATCTCCATTTTGTGCTTTGTAACATGGGGT  
>HPV40\_Alpha\_397014\_nt4061\_Genome\_Tile|1  
ACTGTCTGCTATCTCCATTTTGTGCTTTGTAACATGGGGTGCACCTAACATCTATTACTAA  
>HPV40\_Alpha\_397014\_nt4081\_Genome\_Tile|1  
TGTGCTTTGTAACATGGGGTGCACCTAACATCTATTACTAACCTGTTTATCCCTAATACTCT  
>HPV40\_Alpha\_397014\_nt4121\_Genome\_Tile|1

CCTGTTTATCCTAATACTCTTAGTGTGGTATTTGCCTGCGGTGGTCTTCACACATTTAT  
>HPV40\_Alpha\_397014\_nt4141\_Genome\_Tile|1  
TAGTGTGGTATTTGCCTGCGGTGGTCTTCACACATTTATTATATATACACATACAGAACC  
>HPV40\_Alpha\_397014\_nt4161\_Genome\_Tile|1  
GTGGTCCCTTCACACATTTATTATATATACACATACAGAACCAATTGTAACATGTTGACCTG  
>HPV40\_Alpha\_397014\_nt4321\_Genome\_Tile|1  
TTATATAGGTATACCAAGTAATACTTTGTGTAGTAAATAAACATTTTTTTTATATTACAGC  
>HPV40\_Alpha\_397014\_nt4741\_Genome\_Tile|1  
TTCAGTCAGGTGCCCCGTCCCTTACTATTCCAACAGAGGGTGGGTTTTTCAGTAACGTCCT  
>HPV40\_Alpha\_397014\_nt4841\_Genome\_Tile|1  
AAATACCGTGCATGTGACAGCCACCACACATCACAATCCTGTCTTTACTGATCCCTCGGT  
>HPV40\_Alpha\_397014\_nt5021\_Genome\_Tile|1  
GTCCAGTACACCCGTTCCCTGGTACGTCTGGACGGCCAGGTTGGGACTGTACAGTAAGGC  
>HPV40\_Alpha\_397014\_nt5421\_Genome\_Tile|1  
CCACATACACTGGAGACACCACATACACTAGAGACACCACTGGACACTACTGATGCCCTG  
>HPV40\_Alpha\_397014\_nt5461\_Genome\_Tile|1  
TGGACACTACTGATGCCCTGTTTGATGTGTATGCAGACATGGATACTATAGATGATGATG  
>HPV40\_Alpha\_397014\_nt5481\_Genome\_Tile|1  
TTTGATGTGTATGCAGACATGGATACTATAGATGATGATGCAGCATATGCTACATTCTCA  
>HPV40\_Alpha\_397014\_nt5541\_Genome\_Tile|1  
TTACATCCTGCCGATTCTACTCGTATATCTAACACATCCATACCTCTTGCCACGGTTTCT  
>HPV40\_Alpha\_397014\_nt5901\_Genome\_Tile|1  
ACTGACTATAGGACATCCATACTTTGAGTTAAAAAACCCAATGGTGACATTTTCAGTGCC  
>HPV40\_Alpha\_397014\_nt6141\_Genome\_Tile|1  
TAATAAGGATGAGGATGTGGAAACTCATCTGCCTATGGCACAGGTCCGGGGCAGGATAG  
>HPV40\_Alpha\_397014\_nt6301\_Genome\_Tile|1  
GCTTCTCGGGTAACCTTGGGGACTGTCCTGTATTAGAATTAAAACTGAGGTTATTCAG  
>HPV40\_Alpha\_397014\_nt6821\_Genome\_Tile|1  
CCCCACACCAACCCCATATAATAACAGTAATTTCAAGGAATATTTGCGTCATGGGGAGG  
>HPV40\_Alpha\_397014\_nt6961\_Genome\_Tile|1  
CCTACGTTGTTGGAGGATTGGAACTTTAAAATTGCTCCTCCAGCCTCTGCATCCTTAGAG  
>HPV40\_Alpha\_397014\_nt7361\_Genome\_Tile|1  
GAATGTATGTATGTATTGTTTGTGTATGTTTGTGTTTGTGTGTATGTGTCCGTATGGT  
>HPV40\_Alpha\_397014\_nt7421\_Genome\_Tile|1  
ACTGTGTATGTATTGTTTGTATGCTGTATACCTACGTTGTGGTTGTGTGTTTAATAAAGC  
>HPV40\_Alpha\_397014\_nt7521\_Genome\_Tile|1  
CTTGTTTCAGTGTTGACCATGTACTTTTTGTGTCTAAATCCTCCATTTTGTACTGCGCGAC  
>HPV40\_Alpha\_397014\_nt7781\_Genome\_Tile|1  
AATAAAAAAGTTAGCTAATAGCAGTTTTGGCAAAACATAACACTTGTGGTTAACATAGTAC  
>HPV3\_Alpha\_397005\_nt0081\_Genome\_Tile|1  
ATAAAAGGAGGCACATAATGCATGGCAGTAGCCATGTCTATGGATGCAAACTGCCCAAAA  
>HPV3\_Alpha\_397005\_nt1481\_Genome\_Tile|1  
GGGTTAGGATTTAATGAACTGATTAGACACTTTAAAAGTAACAAAACAGTATGTAGCGAT  
>HPV3\_Alpha\_397005\_nt1561\_Genome\_Tile|1  
TGTATACTGTACATTGGCAGAAAGCTTTAAGACGCTAATACAACCACAGTGCGAATATGC  
>HPV3\_Alpha\_397005\_nt2121\_Genome\_Tile|1  
GAGGAGATAAAATACAGGGGGATGGCGATTGGAAACCAATAGTACAGTATTTAAGGTACC  
>HPV3\_Alpha\_397005\_nt2161\_Genome\_Tile|1  
AGTACAGTATTTAAGGTACCAGGACGTAGAATTTATACCATTTCTATGCGCTCTGAAATC  
>HPV3\_Alpha\_397005\_nt3181\_Genome\_Tile|1  
GACTGGTGTCTCATGAGGGTCTATATTACATGCACGAAGGACAGAAAACTTTTATGTAA  
>HPV3\_Alpha\_397005\_nt3821\_Genome\_Tile|1  
CGTAAAGTGCCACCAGGTATTCAAGTGATACTGGGACACATGTCAATGTTACATAATT  
>HPV3\_Alpha\_397005\_nt3841\_Genome\_Tile|1  
TTCAAGTGATACTGGGACACATGTCAATGTTACATAATTGTGTCCCCGCATTGTACAGT

>HPV3\_Alpha\_397005\_nt4061\_Genome\_Tile|1  
TTGTACAGAATAACACATAGGTTTTACTATGTATCCTCTGGTACTCACAGACAACAATGG  
>HPV3\_Alpha\_397005\_nt4081\_Genome\_Tile|1  
GTTTTACTATGTATCCTCTGGTACTCACAGACAACAATGGCGACCATCTTGTCTTGTTTG  
>HPV3\_Alpha\_397005\_nt4101\_Genome\_Tile|1  
GTACTCACAGACAACAATGGCGACCATCTTGTCTTGTTTGTTGAGCCTGGAGACGTGTAC  
>HPV3\_Alpha\_397005\_nt4121\_Genome\_Tile|1  
CGACCATCTTGTCTTGTTTGTTGAGCCTGGAGACGTGTACATATTATTGCTGTTTATGTT  
>HPV3\_Alpha\_397005\_nt4141\_Genome\_Tile|1  
TTGAGCCTGGAGACGTGTACATATTATTGCTGTTTATGTTAGCTGTCATACTTACATTGT  
>HPV3\_Alpha\_397005\_nt4161\_Genome\_Tile|1  
ATATTATTGCTGTTTATGTTAGCTGTCATACTTACATTGTTTATTATGTATAGACATCTG  
>HPV3\_Alpha\_397005\_nt4181\_Genome\_Tile|1  
AGCTGTCATACTTACATTGTTTATTATGTATAGACATCTGGGACTCCTGTAAGGTTGTAG  
>HPV3\_Alpha\_397005\_nt4201\_Genome\_Tile|1  
TTATTATGTATAGACATCTGGGACTCCTGTAAGGTTGTAGTTGCAGGTCACCTGTATGTA  
>HPV3\_Alpha\_397005\_nt4221\_Genome\_Tile|1  
GGACTCCTGTAAGGTTGTAGTTGCAGGTCACCTGTATGTATTCTTCCTTGATGTATATGC  
>HPV3\_Alpha\_397005\_nt4281\_Genome\_Tile|1  
CCTAGTGTGGTATTGTACCACCGTCTTTTATACTGCTATGTTTTTTTTTACAGTTCAATA  
>HPV3\_Alpha\_397005\_nt4701\_Genome\_Tile|1  
CCACCATACCGACCTTTACTGGTACTGATGGATTTCGAAGTTATTTCTTCAGCCACAACCTA  
>HPV3\_Alpha\_397005\_nt4821\_Genome\_Tile|1  
TTAGCAATCCAGCTTTTACAGAACCTTCCCTGTTGGAGGTTCCCTCAGAATGGTGAGGTTT  
>HPV3\_Alpha\_397005\_nt4841\_Genome\_Tile|1  
GAACCTTCCCTGTTGGAGGTTCCCTCAGAATGGTGAGGTTTCAGGGCACATACTTATTAGC  
>HPV3\_Alpha\_397005\_nt4861\_Genome\_Tile|1  
TCCTCAGAATGGTGAGGTTTCAGGGCACATACTTATTAGCACCCCCACATCTGGTACACA  
>HPV3\_Alpha\_397005\_nt5361\_Genome\_Tile|1  
TGGAACCCCTTGATTGCTCCTGCATCTGCCTCAGCCTATGACTCTCTGTATGATGTGTATG  
>HPV3\_Alpha\_397005\_nt5441\_Genome\_Tile|1  
ATAGGTTTTACATCTGGAGGTCGTAGTGACACTCTGTCTAGAGGCCGTGCTACAGTGTCC  
>HPV3\_Alpha\_397005\_nt5461\_Genome\_Tile|1  
TCGTAGTGACACTCTGTCTAGAGGCCGTGCTACAGTGTCCCCCTGTCTCCACTCTGTC  
>HPV3\_Alpha\_397005\_nt5901\_Genome\_Tile|1  
GCTATCCCCAAATCTTCTAATTCCAAGATGGATATTCCCTAAGGTGTCCGCCTTTCAATAT  
>HPV3\_Alpha\_397005\_nt6521\_Genome\_Tile|1  
ACATTTTCTTAAACAGAGCTGGTATGGCTGGAGACACCGTGCCTGACGCGTTGTACATTAA  
>HPV3\_Alpha\_397005\_nt6541\_Genome\_Tile|1  
GTATGGCTGGAGACACCGTGCCTGACGCGTTGTACATTAAAGGTGACAGTCAGAGCGGCG  
>HPV3\_Alpha\_397005\_nt6561\_Genome\_Tile|1  
CCTGACGCGTTGTACATTAAAGGTGACAGTCAGAGCGGCGGTGCGGATAAAAATTGGTAGT  
>HPV3\_Alpha\_397005\_nt6781\_Genome\_Tile|1  
TGACATTGTGTGTTTCTACTGAAACCTCGGCTACATATGATGCTACTAAATTTAAAGAGT  
>HPV3\_Alpha\_397005\_nt7101\_Genome\_Tile|1  
GATCTTAAAGGATCGTTTTTCCCTGGATCTTTCGCAGTTCCCCCTTGGCAGGAAATTTCTC  
>HPV3\_Alpha\_397005\_nt7121\_Genome\_Tile|1  
CCTGGATCTTTCGCAGTTCCCCCTTGGCAGGAAATTTCTCATGCAGCTCGGTGTAGGTAC  
>HPV3\_Alpha\_397005\_nt7241\_Genome\_Tile|1  
AAAAAGGAAGCGCACCAAAAAATAGCCACATTTGTGTTTTGTATGTGTAACTGTGTGTA  
>HPV3\_Alpha\_397005\_nt7261\_Genome\_Tile|1  
AATAGCCACATTTGTGTTTTGTATGTGTAACCTGTGTGTATGTTTTTTATGTATGTACTG  
>HPV30\_Alpha\_396973\_nt0061\_Genome\_Tile|1  
CGGTACATATAAAAGCACTGTACCAAACGGACAGTGTACCCATGGCTTTCAAATTTGAAA  
>HPV30\_Alpha\_396973\_nt0141\_Genome\_Tile|1

ACTGTGCACCATCTTTGTGAGGTACAAGAAACATCGTTGCTGGAGCTACAGCTACAGTGT  
>HPV30\_Alpha\_396973\_nt0301\_Genome\_Tile|1  
ATTTCTGTTTATTATTTTATAGTAAAGTAAGAAAGATTAGACATTACAACCTATTCATTGT  
>HPV30\_Alpha\_396973\_nt0321\_Genome\_Tile|1  
AGTAAAGTAAGAAAGATTAGACATTACAACCTATTCATTGTATGGGGCAAGCCTAGTGGCA  
>HPV30\_Alpha\_396973\_nt0981\_Genome\_Tile|1  
TAATATCAGAGGACGAAACAGAAGAAGATGAGGGCACAGCATCAGATTTAGATGGGTTTC  
>HPV30\_Alpha\_396973\_nt1001\_Genome\_Tile|1  
GAAGAAGATGAGGGCACAGCATCAGATTTAGATGGGTTTCTAGACAATAGTAATGTAATA  
>HPV30\_Alpha\_396973\_nt1381\_Genome\_Tile|1  
TGATATGGATATAGGCGCCACGCCACCACAGCAAATACAAGAATTATTAATCTAGTAA  
>HPV30\_Alpha\_396973\_nt1421\_Genome\_Tile|1  
GAATTATTAATCTAGTAATGTACAGGCAAAGCTGTGTTATAAATTTAAAGAGTTATTT  
>HPV30\_Alpha\_396973\_nt1781\_Genome\_Tile|1  
GCCGTTGCATTATACTTTTACAAAACGCAATGTCTAATATTAGTGACATATATGGTGAG  
>HPV30\_Alpha\_396973\_nt3141\_Genome\_Tile|1  
TACTGTGGGGACAATGGGTGGACTAAAGTGCCCTTCTGTAGTAGATTACAAAGGTATATAT  
>HPV30\_Alpha\_396973\_nt3161\_Genome\_Tile|1  
GACTAAAGTGCCCTTCTGTAGTAGATTACAAAGGTATATATTATGTACATGACGGTAACAA  
>HPV30\_Alpha\_396973\_nt3181\_Genome\_Tile|1  
TAGATTACAAAGGTATATATTATGTACATGACGGTAACAAAGGTATATTATACAGACTTTA  
>HPV30\_Alpha\_396973\_nt3201\_Genome\_Tile|1  
TATGTACATGACGGTAACAAAGTATATTATACAGACTTTAATGACGAGGCAGTAAAGTAT  
>HPV30\_Alpha\_396973\_nt3521\_Genome\_Tile|1  
CCACGCAAACCGTGTCAACACAAACAACACAAACAACAGACAGTGCCCTTGGTGGAGCTAC  
>HPV30\_Alpha\_396973\_nt3541\_Genome\_Tile|1  
CAAACAACACAAACAACAGACAGTGCCCTTGGTGGAGCTACATGTTACAACACAGAAGTCG  
>HPV30\_Alpha\_396973\_nt3661\_Genome\_Tile|1  
GTTTAAGATATAGGTGTCAAAAACATAAGCACCTATTTGTAAATATATCGTCTACATATC  
>HPV30\_Alpha\_396973\_nt3701\_Genome\_Tile|1  
AAATATATCGTCTACATATCATTGGACCAATACACATACAGAGTACAGCTACATTACTGT  
>HPV30\_Alpha\_396973\_nt3721\_Genome\_Tile|1  
ATTGGACCAATACACATACAGAGTACAGCTACATTACTGTTGTATATAAAGATGAGACCC  
>HPV30\_Alpha\_396973\_nt3741\_Genome\_Tile|1  
GAGTACAGCTACATTACTGTTGTATATAAAGATGAGACCCAGCGTGCCAACTTTTTAAAT  
>HPV30\_Alpha\_396973\_nt3861\_Genome\_Tile|1  
TAACAACACATATGTTGTAATTGGTACAACAAACATGTAATATTGTATTCCACATGTAAA  
>HPV30\_Alpha\_396973\_nt4121\_Genome\_Tile|1  
GTTTGTGTTGTCATCGTCCTACATTACTGCATTTACTATATTTTTGCTGTTTTTTTATAT  
>HPV30\_Alpha\_396973\_nt4141\_Genome\_Tile|1  
ACATTACTGCATTTACTATATTTTTGCTGTTTTTTTATATACCTTTATTACTTGTATATG  
>HPV30\_Alpha\_396973\_nt4481\_Genome\_Tile|1  
CGTGCTGGTTATGTTCCGTTAGGTACACGGCCTACAACAGTTGTGGACGCATCCCCTGCT  
>HPV30\_Alpha\_396973\_nt4981\_Genome\_Tile|1  
AAAGGTCACTGACCCACATTCCTTACCAAACCTGAAACATTAATTACTGTGGATAATCC  
>HPV30\_Alpha\_396973\_nt5421\_Genome\_Tile|1  
TtagtagtCAAACtACCAATGTTACTATACCTTTGGGTAAATATTGGGATGTTCCCTATTT  
>HPV30\_Alpha\_396973\_nt5441\_Genome\_Tile|1  
GTTACTATACCTTTGGGTAAATATTGGGATGTTCCCTATTTATTCGGGCCCCGATATAGTA  
>HPV30\_Alpha\_396973\_nt5461\_Genome\_Tile|1  
ATATTGGGATGTTCCCTATTTATTTCGGGCCCCGATATAGTATTGCCTACTGGTCCTACCAC  
>HPV30\_Alpha\_396973\_nt5481\_Genome\_Tile|1  
ATTCGGGCCCCGATATAGTATTGCCTACTGGTCCTACCACATGGCCCTATGCCCTCAGG  
>HPV30\_Alpha\_396973\_nt5501\_Genome\_Tile|1  
TTGCCTACTGGTCCTACCACATGGCCCTATGCCCTCAGGCCCATTTGACACTACACAT

>HPV30\_Alpha\_396973\_nt7101\_Genome\_Tile|1  
CGCTCGGCCCCAGTTCCTCTACCTCTACACCATCAGCCAAACGCAAGCGGCGGTGATTG  
>HPV30\_Alpha\_396973\_nt7161\_Genome\_Tile|1  
TTTGTGTCTGTGTATGTTTCCTTACTATTTATTTGTGCATGAATGTATGTTTTGTATGGA  
>HPV30\_Alpha\_396973\_nt7201\_Genome\_Tile|1  
AATGTATGTTTTGTATGGATGTATGTTTTGTTTATATGTTTCTGTATGACTGTATGTAT  
>HPV30\_Alpha\_396973\_nt7381\_Genome\_Tile|1  
GTCCTCCACCCTTTTTGGTTGTTGCACACCACTGTGCAGTTACTTTTTATATTTATATTA  
>HPV30\_Alpha\_396973\_nt7421\_Genome\_Tile|1  
TACTTTTTTATATTTATATTATACCACCACAGTAGTGTCCATTTTATGCATTTGTGCCCTC  
>HPV30\_Alpha\_396973\_nt7441\_Genome\_Tile|1  
TACCACCACAGTAGTGTCCATTTTATGCATTTGTGCCCTCCATTTTACCTTTCAACCGAT  
>HPV30\_Alpha\_396973\_nt7561\_Genome\_Tile|1  
AAACACTTAATCCACTGGCATGGTGCCGTTTCCTGCACTTTATGTTTTTTTTTGCAACGT  
>HPV27\_Alpha\_396964\_nt0001\_Genome\_Tile|1  
TATGTGGTTTATAATATATAACTATAATCCTTTATTTAAAAATAGGGTGTAACCGAAAAC  
>HPV27\_Alpha\_396964\_nt4081\_Genome\_Tile|1  
GTTTTTACAATAATTGTGACATATCGCCACCATTGCTGCTAACCTGTATATATAGTTTT  
>HPV27\_Alpha\_396964\_nt4201\_Genome\_Tile|1  
TGTGATATTGTGGGGTCGTGATGATATTGACTGTCTGTTGGTGATTCTCACCCCTATTGG  
>HPV27\_Alpha\_396964\_nt4221\_Genome\_Tile|1  
ATGATATTGACTGTCTGTTGGTGATTCTCACCCCTATTGGCTTATTATTGTTGTTGTTTT  
>HPV27\_Alpha\_396964\_nt4281\_Genome\_Tile|1  
ATGTCCGTTTGATCCAACACACCTAACACCCCTCACCCCTTTTGATACATTATCTCTTTT  
>HPV27\_Alpha\_396964\_nt4601\_Genome\_Tile|1  
TGTAGGTACCAGGCCGACCACTGTGGTTGATATTGGTGTGGCACCCAAGCCACCTGTTGT  
>HPV27\_Alpha\_396964\_nt5481\_Genome\_Tile|1  
TACTACCCAGCCCTCGCGGCTCCCTGGCTAATACCACGGTATCTGCCTCCTCTGCATCT  
>HPV27\_Alpha\_396964\_nt5901\_Genome\_Tile|1  
CCACCCATATTATTCTATAAAGAAGGGTAGCAATAATAGGTTGGCAGTGCCTAAGGTGTC  
>HPV27\_Alpha\_396964\_nt5921\_Genome\_Tile|1  
AGAAGGGTAGCAATAATAGGTTGGCAGTGCCTAAGGTGTCCGGCTACCAATACCGTGTAT  
>HPV27\_Alpha\_396964\_nt6761\_Genome\_Tile|1  
CACGGAGTACCAATGTCTCTCTGTGTGCAGCTGAGGTGTCTGATAATACTAATTATAAAG  
>HPV27\_Alpha\_396964\_nt7221\_Genome\_Tile|1  
GTAAACGCAAACGGGTGAGGCGTTACGTGTGAGTGTCTCGATAATTTCCCTCTGTCTACCT  
>HPV27\_Alpha\_396964\_nt7241\_Genome\_Tile|1  
CGTTACGTGTGAGTGTCTCGATAATTTCCCTCTGTCTACCTTTTACATAATATTTGGTGT  
>HPV27\_Alpha\_396964\_nt7261\_Genome\_Tile|1  
ATAATTTCCCTCTGTCTACCTTTTACATAATATTTGGTGTGTTTGTGCTTATGTTTGTGT  
>HPV27\_Alpha\_396964\_nt7281\_Genome\_Tile|1  
TTTACATAATATTTGGTGTGTTTGTGCTTATGTTTGTGTTGTTGTTTGTACGTATGTTA  
>HPV25\_Beta\_396948\_nt0001\_Genome\_Tile|1  
TAACGGTAAGTCTATTGATACGGGCGCGGTAAATTATTACTCATTCGTACTTGTGCTG  
>HPV25\_Beta\_396948\_nt0201\_Genome\_Tile|1  
TGGCAACTGCAAATGCTGAACAGAGCATAGGACCACCAGAGCAAGCGCAGGTTATACAGC  
>HPV25\_Beta\_396948\_nt0341\_Genome\_Tile|1  
TGTGGCAACTTTCTAACATATTTAGAGATCTGTGAGTTTGATGAGAAAAGACTTAGTTTG  
>HPV25\_Beta\_396948\_nt0461\_Genome\_Tile|1  
TTTGAATTTAATGAATTTTACGAAAGCACTGTAACAGGTAGGGAATTTGAAGACGTTACA  
>HPV25\_Beta\_396948\_nt1801\_Genome\_Tile|1  
GGATCAATGGGTTCCGGAGTATTTACATATGGCTCATATCCAGATTGGATAGCCCACCAA  
>HPV25\_Beta\_396948\_nt2101\_Genome\_Tile|1  
TCTGAATGGATTTATACTAAAATTCATGAAGTGGAAGGAGAGGGTCAATGGTCCACCATT  
>HPV25\_Beta\_396948\_nt2121\_Genome\_Tile|1

AATTCATGAAGTGGAAGGAGAGGGTCAATGGTCCACCATTGTACAATTTTAAAGGTATCA  
>HPV25\_Beta\_396948\_nt2141\_Genome\_Tile|1  
AGGGTCAATGGTCCACCATTGTACAATTTTAAAGGTATCAGCAAGTCAACTTTATAATGT  
>HPV25\_Beta\_396948\_nt2281\_Genome\_Tile|1  
AAATCAGCTTTTACTATGTCATTGATAAAAGTGTTAAAGGGTAGGGTATTATCATTCCTGT  
>HPV25\_Beta\_396948\_nt2481\_Genome\_Tile|1  
TAAACACAAGGCACCAATGCAGACAAAATTCCTGCACTATTGCTTACATCCAATATAAA  
>HPV25\_Beta\_396948\_nt4521\_Genome\_Tile|1  
CCTTTGGGAGAAGGTCCGATACGTGTTGGTGGAAACCCCCACGGTTATTAGACCTTCTTTA  
>HPV25\_Beta\_396948\_nt4721\_Genome\_Tile|1  
AATACATCCTGGGCCTGTTGTACCTCCACTGACACCCCGGTGACAACAACCTTCTAGAGG  
>HPV25\_Beta\_396948\_nt5201\_Genome\_Tile|1  
GGACGAAGTTACACAAATTTTGTAGCAGGATTTAAATGATTTTCAGGAGCCTCCTGACAG  
>HPV25\_Beta\_396948\_nt5661\_Genome\_Tile|1  
CGTGTGAAACTACACGCTCTGCATCATATTATACCCAAGATATTCAGGGATACTATGTG  
>HPV25\_Beta\_396948\_nt5681\_Genome\_Tile|1  
TGCATCATATTATACCCAAGATATTCAGGGATACTATGTGTCTTATCCTGAGGATAGAGA  
>HPV25\_Beta\_396948\_nt6041\_Genome\_Tile|1  
TAATGTGTACAACGTCCAAGGCTCTAAATTGCAAATTCCAAAGTGTGAGAAATCAACA  
>HPV25\_Beta\_396948\_nt6741\_Genome\_Tile|1  
TTTTACATACCACCTAACAGTAGTCAGGCTCAATATAATAATCTAGGTAACCTCAATGTAT  
>HPV25\_Beta\_396948\_nt6981\_Genome\_Tile|1  
GATGTTTCCAAAATCACTGATTATAATTCTCAAAAATTTACAGAATATTTGAGACATGTA  
>HPV25\_Beta\_396948\_nt7041\_Genome\_Tile|1  
GAAGAATATGAGTTATCATTAATATTACAACCTTTGCAAAGTACCGTTGAAGGCAGAAATA  
>HPV25\_Beta\_396948\_nt7181\_Genome\_Tile|1  
TCAGGATACTTATCGCTACATTGATTCTTTAGCCACACGTTGTCCAGATAAAAATCCTCC  
>HPV25\_Beta\_396948\_nt7381\_Genome\_Tile|1  
GTACAAAAACAGTTTCTCCCGAATATCTACTAGGGGAATAAAAAGAAAACGTAAAAATT  
>HPV25\_Beta\_396948\_nt7561\_Genome\_Tile|1  
AAATCAGATACAGTCTGTGCCAAACTCAGGCAGCTGCTCGCCAGATGCGTATCGTCTTTA  
>HPV19\_Beta\_396940\_nt0181\_Genome\_Tile|1  
ATTTTGCAGCTGCAAACCTTATGGCTAACGCACAGGCTACAGAAGAAGAGATAGAAATTGT  
>HPV19\_Beta\_396940\_nt0201\_Genome\_Tile|1  
TGGCTAACGCACAGGCTACAGAAGAAGAGATAGAAATTGTAGAAGAGGGAACCTACTGCAC  
>HPV19\_Beta\_396940\_nt0281\_Genome\_Tile|1  
TTACCAGCAACAATTGCTGGATTAGCAGCATTGCTAGAAATACCGTTGGATGACTGTTTA  
>HPV19\_Beta\_396940\_nt0321\_Genome\_Tile|1  
TACCGTTGGATGACTGTTTAGTGCTTGTAAATTTCTGTGGCAAGTTTTATCACATTTAG  
>HPV19\_Beta\_396940\_nt0341\_Genome\_Tile|1  
GTGCCTTGTAATTTCTGTGGCAAGTTTTATCACATTTAGAAGCGTGCGAATTTGATGAT  
>HPV19\_Beta\_396940\_nt1801\_Genome\_Tile|1  
TTATTTTGGTATAAGGGCTGTATGGGATCTGGAGGGTTTACTTATGGTCCATACCCAGAT  
>HPV19\_Beta\_396940\_nt3681\_Genome\_Tile|1  
AATCCTCCAGGTCACCTCAGCCACTTCTCCACAACCTCCTTGCGATCAAGAGGGAGCA  
>HPV19\_Beta\_396940\_nt3781\_Genome\_Tile|1  
GCGCAGTAGGGGGAGAGGGAAACGATCCAGAGAGTCACCATCCCCACCAACACCAAACG  
>HPV19\_Beta\_396940\_nt4121\_Genome\_Tile|1  
CTCATTAGTTTGTCTCCTTTAATCAACGAAAGCACTTTGATGATACAGTAAGGTATCCT  
>HPV19\_Beta\_396940\_nt4141\_Genome\_Tile|1  
TAATCAACGAAAGCACTTTGATGATACAGTAAGGTATCCTAAAGGTGTGGACCGATCGTT  
>HPV19\_Beta\_396940\_nt4481\_Genome\_Tile|1  
CAACTGGTTACGTGCCTTTGGGGGAGGGTCCAGTACGTGTTGGTGGTACTGCAACGGTGA  
>HPV19\_Beta\_396940\_nt4681\_Genome\_Tile|1  
GAAACCATTGCAGAGGTGCACCCTACACCTAGTATACCCTCAACAGATACCCAGTGACC



>HPV19\_Beta\_396940\_nt5041\_Genome\_Tile|1  
CTTAGAACTGCATTTAGGCGAAGGGGAGGATTAACAAATAGGCGTTTAGTACAACAAGTA  
>HPV19\_Beta\_396940\_nt5081\_Genome\_Tile|1  
GGCGTTTAGTACAACAAGTAGCTGTAGATGATCCCATATTCTTAAGTCAAGCTTCAAGGT  
>HPV19\_Beta\_396940\_nt5101\_Genome\_Tile|1  
GCTGTAGATGATCCCATATTCTTAAGTCAAGCTTCAAGGTAGTTTCTTTTCAGTTTGAT  
>HPV19\_Beta\_396940\_nt5201\_Genome\_Tile|1  
AAGATTTAGATAATTTTCGGGAGCCACCTAATAGGGATTTTTTGGATGTGCAAACCTTAG  
>HPV19\_Beta\_396940\_nt5261\_Genome\_Tile|1  
GTAGGCCACAATATTCAGAAACACCATCTGGTTACATCAGAGTTAGTCGCCTAGGCCAAA  
>HPV19\_Beta\_396940\_nt5441\_Genome\_Tile|1  
GTGACGCTTCAATAGTTCAAGGTAATACAGAAAGCACATTTATAAATATTAATATTGATG  
>HPV19\_Beta\_396940\_nt5521\_Genome\_Tile|1  
TATAGTATTACTGCTAACTCAGAAGATTTGCTTTTAGATGAAGCACAGGAAGACTTTAGT  
>HPV19\_Beta\_396940\_nt5561\_Genome\_Tile|1  
AAGCACAGGAAGACTTTAGTGGGTACAGTTAGTAGTTGGTGGGCGCCGTTCTACTTCCA  
>HPV19\_Beta\_396940\_nt5581\_Genome\_Tile|1  
GGGTCACAGTTAGTAGTTGGTGGGCGCCGTTCTACTTCCACATATACAGTTCCCAATTT  
>HPV19\_Beta\_396940\_nt5601\_Genome\_Tile|1  
TGGGCGCCGTTCTACTTCCACATATACAGTTCCCAATTTGAAACTACAAGGTCTGGATC  
>HPV19\_Beta\_396940\_nt5801\_Genome\_Tile|1  
ATCCCAGCCTTCGCAAGCGATTCAAACGAAAACGTAAATATTTATAATTTTCTTTTGCAG  
>HPV19\_Beta\_396940\_nt6001\_Genome\_Tile|1  
TCACCCATATTTTAATGTTTATAATGTTGCAGGATCAAAATTAGAAATTCAAAAGTTTC  
>HPV19\_Beta\_396940\_nt6361\_Genome\_Tile|1  
ACACTGGGATAAAGCATTACCATGTGCTGAGCAAGATATTCCTCAGGGATCCTGTCCTCC  
>HPV19\_Beta\_396940\_nt6381\_Genome\_Tile|1  
CATGTGCTGAGCAAGATATTCCTCAGGGATCCTGTCCTCCTATAGAGTTAATTAAGTCAG  
>HPV19\_Beta\_396940\_nt6701\_Genome\_Tile|1  
ATGAAAAATACATACTACATACCTCCTAACAATAGTCAGCAACAATATACTAATTTAGGA  
>HPV19\_Beta\_396940\_nt7361\_Genome\_Tile|1  
ACTATATCTTCACGGGTCTCCAGCAGAGGAACAAAAGAAAGCGTAAAAATTAAATTTGT  
>HPV19\_Beta\_396940\_nt7541\_Genome\_Tile|1  
ACAGTCTGAGCCGCATCAGGCACAGCAGCTGGCCAGATCTGATCTTCGTTGTTTTAACAC  
>HPV19\_Beta\_396940\_nt7621\_Genome\_Tile|1  
CAATGGAATCATAATCTTGCCAATCTCTTTTGGCACTGCACTTGGCAAAGGTAAGGACCG  
>HPV17\_Beta\_396932\_nt0201\_Genome\_Tile|1  
TGGATAGGCCAAAACCTCAAACAGTGAGGGAGCTTGCTGATACCTTGTGTATTCCATTAG  
>HPV17\_Beta\_396932\_nt0221\_Genome\_Tile|1  
ACAGTGAGGGAGCTTGCTGATACCTTGTGTATTCCATTAGTGGATATTTTATTACCTTGC  
>HPV17\_Beta\_396932\_nt0241\_Genome\_Tile|1  
TACCTTGTGTATTCCATTAGTGGATATTTTATTACCTTGCAGATTTTGTAAATAGGTTTTT  
>HPV17\_Beta\_396932\_nt0261\_Genome\_Tile|1  
TGGATATTTTATTACCTTGCAGATTTTGTAAATAGGTTTTTAGCTTACATAGAATTGGTGG  
>HPV17\_Beta\_396932\_nt0301\_Genome\_Tile|1  
AGCTTACATAGAATTGGTGGCGTTTGATTTAAAAGGTTTGCAGTTAATTTGGACTGAAGA  
>HPV17\_Beta\_396932\_nt0421\_Genome\_Tile|1  
TAAGTTTTATGAACAATCAGTGAGTGGAAGGGAGTTAGAGGAAATAGAGCACAAGCCAAT  
>HPV17\_Beta\_396932\_nt1621\_Genome\_Tile|1  
TAATGTCGAAAAAGTAGGGAACTGTATCACGATTGCTTATGAATATTCTGCAAGTAGC  
>HPV17\_Beta\_396932\_nt1641\_Genome\_Tile|1  
AAACTGTATCACGATTGCTTATGAATATTCTGCAAGTAGCAGAGGTACAAATGTTAGCAG  
>HPV17\_Beta\_396932\_nt1801\_Genome\_Tile|1  
AACACAAACTATGATTAATCATCAAACAGCACAGGCAACACAATTCGATCTATCTACCAT  
>HPV17\_Beta\_396932\_nt2021\_Genome\_Tile|1

CGTGGAGAAATGAAGGAAATGAGCATTCTCTACGTGGGTACATAGAAAATTATTAGTTGTT  
>HPV17\_Beta\_396932\_nt2101\_Genome\_Tile|1  
TGATATAGTAAAATTTATTAGATATCAGGACATTAATTTTATTAGGTTTTTAGATATATT  
>HPV17\_Beta\_396932\_nt2741\_Genome\_Tile|1  
AGAAGATATAGAGACTCAAATAAAACACTGGCAATTATTAAGACAGGAACAAGTACTGTT  
>HPV17\_Beta\_396932\_nt2761\_Genome\_Tile|1  
TAAACACTGGCAATTATTAAGACAGGAACAAGTACTGTTTTACTATGCCAGAAAAAATG  
>HPV17\_Beta\_396932\_nt3061\_Genome\_Tile|1  
CATATACAGTGTGGTCATTTATTTATTACCAAATTTAGATGACACCTGGAATAAAGTTG  
>HPV17\_Beta\_396932\_nt3801\_Genome\_Tile|1  
GAAGCTAACAACTGAAATGCTTTTCGATATAGAGCAAAAAGCGATATGGCAGTTTAGTT  
>HPV17\_Beta\_396932\_nt3821\_Genome\_Tile|1  
CTTTCGATATAGAGCAAAAAGCGATATGGCAGTTTAGTTAAATATTACAGCACTACATG  
>HPV17\_Beta\_396932\_nt3841\_Genome\_Tile|1  
AGCGATATGGCAGTTTAGTTAAATATTACAGCACTACATGGTCATGGGTGGGTGCAAATA  
>HPV17\_Beta\_396932\_nt3861\_Genome\_Tile|1  
AAATATTACAGCACTACATGGTCATGGGTGGGTGCAAATACTAATGACAGAATAGGTAGA  
>HPV17\_Beta\_396932\_nt3881\_Genome\_Tile|1  
GTCATGGGTGGGTGCAAATACTAATGACAGAATAGGTAGATCAAGAATGTTACTAGCATT  
>HPV17\_Beta\_396932\_nt3901\_Genome\_Tile|1  
CTAATGACAGAATAGGTAGATCAAGAATGTTACTAGCATTTAACACATATGATGAAAGAG  
>HPV17\_Beta\_396932\_nt3921\_Genome\_Tile|1  
TCAAGAATGTTACTAGCATTTAACACATATGATGAAAGAGAATTGTTTATCCAAAAAATG  
>HPV17\_Beta\_396932\_nt4001\_Genome\_Tile|1  
TTGGTCACTAGGACATCTAGATGATTTATAGGCATTACTTTTTTAACATTACTAACCTTG  
>HPV17\_Beta\_396932\_nt4701\_Genome\_Tile|1  
GCTATGGCGGATCATGTTTTAGTGTTCTGAAGGTTTTGGTGGACAAAACATAGGAGGTTCC  
>HPV17\_Beta\_396932\_nt4721\_Genome\_Tile|1  
AGTGTTCTGAAGGTTTTGGTGGACAAAACATAGGAGGTTCCAGGAATGCAGCCATTGATAC  
>HPV17\_Beta\_396932\_nt4741\_Genome\_Tile|1  
GACAAAACATAGGAGGTTCCAGGAATGCAGCCATTGATACAGCACAGGAGAGCTTTGAAA  
>HPV17\_Beta\_396932\_nt4841\_Genome\_Tile|1  
AGGCACACCTCCTAGAACAAGTACTCCAGTTCACGTCAGTAGAATCACTATCAAGCTT  
>HPV17\_Beta\_396932\_nt4881\_Genome\_Tile|1  
GTAGAATCACTATCAAGCTTAAGAAGAGCTTTATACAATAGACGATTGACTGAACAAGTT  
>HPV17\_Beta\_396932\_nt5121\_Genome\_Tile|1  
ACACCTCAGGGTTATTTACGAGTCAGTAGACTAGGTAGAAGAGCCAGCATTCGTA CTGC  
>HPV17\_Beta\_396932\_nt5321\_Genome\_Tile|1  
AGACATTAATATTTGATGAACCAGGGCCTTTGAATGTAGGCATCCAAGAATCACCCTGGC  
>HPV17\_Beta\_396932\_nt5341\_Genome\_Tile|1  
CAGGGCCTTTGAATGTAGGCATCCAAGAATCACCCTGGCTGACACTATAGAAGAAGATT  
>HPV17\_Beta\_396932\_nt5361\_Genome\_Tile|1  
ATCCAAGAATCACCCTGGCTGACACTATAGAAGAAGATTTCAATTCTGCAGATTTGTTA  
>HPV17\_Beta\_396932\_nt5381\_Genome\_Tile|1  
TGACACTATAGAAGAAGATTTCAATTCTGCAGATTTGTTACTGGAAGATGCTGTAGATGA  
>HPV17\_Beta\_396932\_nt5461\_Genome\_Tile|1  
TATTTGGCAATCCTCGCCGACGACAAACATCTGTAACGTGCCCCGGTTTGAAACACCTA  
>HPV17\_Beta\_396932\_nt5521\_Genome\_Tile|1  
GGGACACTGGCTTTTACATACATGACACTCAGGGATACACAGTAGCATATCCAGAGTCAC  
>HPV17\_Beta\_396932\_nt6221\_Genome\_Tile|1  
AGAACATTGGGACAGGGCTCCTGTATGTGAAAATGAACAAACAATCAAACAGGCCTGTG  
>HPV17\_Beta\_396932\_nt6241\_Genome\_Tile|1  
CTGTATGTGAAAATGAACAAACAATCAAACAGGCCTGTGTCCACCATTGGAATTAAAAA  
>HPV17\_Beta\_396932\_nt7101\_Genome\_Tile|1  
GTAAATCTTACTGAGAAATTATCATTAGATTTAGATCAGTATCCCCTAGGACGAAAATTT

>HPV15\_Beta\_396924\_nt0281\_Genome\_Tile|1  
AGATTTTGTCTCAGAGATTTTAAACATATATAGAATTAGTAAGTTTGAATCGTAAAGGTCTG  
>HPV15\_Beta\_396924\_nt0421\_Genome\_Tile|1  
TAACCTTTTATGAACAGTCGGTGTGTAGTTGGGAAATAGAGATAGTAGAACAGAAGCCTGT  
>HPV15\_Beta\_396924\_nt0441\_Genome\_Tile|1  
TGTGTAGTTGGGAAATAGAGATAGTAGAACAGAAGCCTGTTGGAGATATTATTATTCGCT  
>HPV15\_Beta\_396924\_nt0461\_Genome\_Tile|1  
ATAGTAGAACAGAAGCCTGTTGGAGATATTATTATTCGCTGCAAATTTTGTCTGAAGAAA  
>HPV15\_Beta\_396924\_nt1601\_Genome\_Tile|1  
GGTAAAGTAGAGAAACAGTATTAAGATTACTTACGAATTTGTTACAAGTATCTGAAATA  
>HPV15\_Beta\_396924\_nt2101\_Genome\_Tile|1  
AGATATAAAATTTTATACAATTTTATAGATTCATTTAAAGCTTTTACATAATACTCCTAA  
>HPV15\_Beta\_396924\_nt2441\_Genome\_Tile|1  
ATGCTAACTTCTAACATTGATATCATGAAAGAAGAAAGGTATAAATATTACGCAGTAGA  
>HPV15\_Beta\_396924\_nt3041\_Genome\_Tile|1  
GTTTGGACATACATTTATTACCAGACTTTAGATGACACATGGAACAAGGTGGAAGGAAAA  
>HPV15\_Beta\_396924\_nt3081\_Genome\_Tile|1  
GGAACAAGGTGGAAGGAAAAATTGACTATCATGGCGCATATTATTGGAAGGAACCTTA  
>HPV15\_Beta\_396924\_nt3901\_Genome\_Tile|1  
ACGCTCACGATTGTTACTGGCATTCTCTCCAACACCGAAAGAGAGCTCTTTATCAAAAT  
>HPV15\_Beta\_396924\_nt3921\_Genome\_Tile|1  
CATTCTCTTCCAACACCGAAAGAGAGCTCTTTATCAAAATAATGAAACTGCCACCAGGCG  
>HPV15\_Beta\_396924\_nt4001\_Genome\_Tile|1  
TTAGATGATTTATGATTTTTGTGCTTTTTTAATCAACTAACAGTAGTGTTTTTTATTGCT  
>HPV15\_Beta\_396924\_nt5441\_Genome\_Tile|1  
TGTTTTGGCAATACACGGCGCAGCACTACAACATATACAGTACCTAGATTTGAATCACCTA  
>HPV15\_Beta\_396924\_nt5461\_Genome\_Tile|1  
AGCACTACAACATATACAGTACCTAGATTTGAATCACCTAGAAATACTGGGTTTTACATA  
>HPV15\_Beta\_396924\_nt5481\_Genome\_Tile|1  
ACCTAGATTTGAATCACCTAGAAATACTGGGTTTTACATACAAGATGTGCATGGGTATAA  
>HPV15\_Beta\_396924\_nt6041\_Genome\_Tile|1  
ATTAGGAGTTGGTACTTCAGGCCATCCTTTATTCAACAAAGTAAAAGATACAGAGAATAA  
>HPV15\_Beta\_396924\_nt6061\_Genome\_Tile|1  
GCCATCCTTTATTCAACAAAGTAAAAGATACAGAGAATAACAGTAATTATCAAGGCAACT  
>HPV15\_Beta\_396924\_nt6321\_Genome\_Tile|1  
GGTAACATTAATAACAAGGCCTTATCAGTTACTAAGTCAGATGTGAGTCTGGATATAGTG  
>HPV15\_Beta\_396924\_nt6561\_Genome\_Tile|1  
GCACAATCAACCCAACAACAAAATAAAGTTAGCAAATTTCTACTTTCTCCACAGTTAGT  
>HPV15\_Beta\_396924\_nt6721\_Genome\_Tile|1  
TTATTACTGTTGCAGATAACACAAGGAATACAAATTTTACTATTAGTGTTACCTCTGATG  
>HPV15\_Beta\_396924\_nt6741\_Genome\_Tile|1  
ACAAGGAATACAAATTTTACTATTAGTGTTACCTCTGATGGTAATGCCATAAATGAATAT  
>HPV14D\_Beta\_396918\_nt0161\_Genome\_Tile|1  
ATATATACTACAGAAAAACAGAGAATGCAGACTCATGGCGACAACCTGACTCTTCAACAG  
>HPV14D\_Beta\_396918\_nt0261\_Genome\_Tile|1  
TGATAGCACAGAAACCAAATCTTCTTTTATAGAGCCACCATTACCTGCAACTATATTTGG  
>HPV14D\_Beta\_396918\_nt2181\_Genome\_Tile|1  
GTTGGTTGTATATGGACACTTATTTGAGGAATGGCCTTGATGGTCATTATGTTTCTTTAG  
>HPV14D\_Beta\_396918\_nt3941\_Genome\_Tile|1  
ACACCCCTAACATACTAACATAATAGCTTGCTACTAACATCTAACATTTATTGCATTTTT  
>HPV14D\_Beta\_396918\_nt3961\_Genome\_Tile|1  
TAATAGCTTGCTACTAACATCTAACATTTATTGCATTTTTTGCTTTTTGTTTGCATTATTT  
>HPV14D\_Beta\_396918\_nt4741\_Genome\_Tile|1  
CGAAGAACCAACCCCCCTAGAAGAACTAGTACCCATTACAAAGGATACAGACAGCTAT  
>HPV14D\_Beta\_396918\_nt4761\_Genome\_Tile|1

GAAGAACTAGTACCCCATTACAAAGGATACAGACAGCTATAAGAAGGAGGGGTGGGCTTA  
>HPV14D\_Beta\_396918\_nt4781\_Genome\_Tile|1  
CAAAGGATACAGACAGCTATAAGAAGGAGGGGTGGGCTTACAAATAGGCGCTTAGTCCAA  
>HPV14D\_Beta\_396918\_nt4821\_Genome\_Tile|1  
CAAATAGGCGCTTAGTCCAACAAGTTTCTGTAGAAAACCCCTTATTTTAAACAAGACCAT  
>HPV14D\_Beta\_396918\_nt4841\_Genome\_Tile|1  
CAAGTTTCTGTAGAAAACCCCTTATTTTAAACAAGACCATCTAGACTAGTGCAATTTTCAG  
>HPV14D\_Beta\_396918\_nt5361\_Genome\_Tile|1  
CATATACCGTCCCTCGTTTTGAAACAACCAGATCTGGGTCATATTATGCACAGGATACAA  
>HPV14D\_Beta\_396918\_nt5981\_Genome\_Tile|1  
GTTGGTGATACAGAAAATCCCAACTCATACAGGCAACAAGCTAACTCCACTGATGACAGA  
>HPV14D\_Beta\_396918\_nt7101\_Genome\_Tile|1  
CAAAAACAGTTTCGACTAGGGGATCCATCAAGGGTATTAAACGAAAACGCAAGAATTAGA  
>HPV14D\_Beta\_396918\_nt7301\_Genome\_Tile|1  
GCCAACTCAGGTTTGC GCCAGATCAGATACAGCGCGAGCCGCGTTGGATCAAGCTACATC  
>HPV14D\_Beta\_396918\_nt7321\_Genome\_Tile|1  
GATCAGATACAGCGCGAGCCGCGTTGGATCAAGCTACATCGTCTGAACACGCAAAAGACT  
>HPV14D\_Beta\_396918\_nt7361\_Genome\_Tile|1  
GTCTGAACACGCAAAAGACTCAAGGAAATGTAAGTGTGCCAGTCTATTGTGTTTCAATTT  
>HPV12\_Beta\_396910\_nt0281\_Genome\_Tile|1  
TTAGATATACCTTTAGTTGACTGTTTGGTACCTTGCAATTTTTCGGGAAAGTTCTTAGAT  
>HPV12\_Beta\_396910\_nt0501\_Genome\_Tile|1  
CTGGAATACTATATTTGACTTAAAGATAAGGTGTCAGACGTGCTTGTTCATTTTTAGATA  
>HPV12\_Beta\_396910\_nt1901\_Genome\_Tile|1  
CCATGGTCCAATGGGCCTTCGATAATAATTACTTAGAAGAACCAGATATAGCTTATCAAT  
>HPV12\_Beta\_396910\_nt2441\_Genome\_Tile|1  
GCTTAGACGGCCATTTTGTCTTTAGATTGTAAATATAAAGCGCCCGTACAAATTAAGT  
>HPV12\_Beta\_396910\_nt4221\_Genome\_Tile|1  
CTACTAACCACACTAACAATTTTTTTTACATTTATTTTACGTTTTTATTATTGCTATGGC  
>HPV12\_Beta\_396910\_nt4441\_Genome\_Tile|1  
GGTATTGGTACCGGTCGCGGTACTGGAGGTGTCACTGGATACAGACCTCTACCTGAAGGG  
>HPV12\_Beta\_396910\_nt4461\_Genome\_Tile|1  
TACTGGAGGTGTCACTGGATACAGACCTCTACCTGAAGGGCCCGGTATCCGTGTTGGAGG  
>HPV12\_Beta\_396910\_nt4601\_Genome\_Tile|1  
CTGTGGAGCCCCTGCTTCCTCGGTAGTTCCATTAAGTGAATCCTCAGCAACTGATCTAC  
>HPV12\_Beta\_396910\_nt4681\_Genome\_Tile|1  
ATAGCTGAGATTAATCCTGTTTCAGAGGGCCCTACGATTGATTCACCTGTTGTGACAACA  
>HPV12\_Beta\_396910\_nt5021\_Genome\_Tile|1  
CTCCACTTCAGAGGACACAAACCACTGGCCGACGTAGAGGAGTGTCCTAACAAATAGAA  
>HPV12\_Beta\_396910\_nt5061\_Genome\_Tile|1  
AGTGTCCCTAACAAATAGAAGGCTAGTACAACAAGTGCAAGTTGATAATCCTTTATTTAT  
>HPV12\_Beta\_396910\_nt5081\_Genome\_Tile|1  
GGCTAGTACAACAAGTGCAAGTTGATAATCCTTTATTTATAGATAAACCTTCTAAGTTAG  
>HPV12\_Beta\_396910\_nt5101\_Genome\_Tile|1  
GTTGATAATCCTTTATTTATAGATAAACCTTCTAAGTTAGTACGCTTTTCATTTGATAAC  
>HPV12\_Beta\_396910\_nt5201\_Genome\_Tile|1  
ACTTAGAAACATTTGAGGAGCCACCTGATAGGGATTTCCTTGATATTAAGCTAAGTC  
>HPV12\_Beta\_396910\_nt5441\_Genome\_Tile|1  
ATGCAACCATAGTGCAAGGCACTGTTGAAAGTACATTTGTAGATATGGACATAGCGGAAG  
>HPV12\_Beta\_396910\_nt5601\_Genome\_Tile|1  
CAGCACAACATCATACACTGTGCCCCGTTTTGAAACTACAAGGAGCAGTTCTTATTATGT  
>HPV12\_Beta\_396910\_nt6341\_Genome\_Tile|1  
AGAACACTGGGAGAAAGCCTTACCCTGCGGGGATGCACCAGCTGAAAATGGTGTTTGCCC  
>HPV12\_Beta\_396910\_nt6361\_Genome\_Tile|1  
TACCCTGCGGGGATGCACCAGCTGAAAATGGTGTTTGCCCTCCCATAGAGTTAAAGAACA

>HPV12\_Beta\_396910\_nt6461\_Genome\_Tile|1  
CAACATGAATTTTAAAACATTGCAACAAAACAGATCTGATGTCAGCCTTGACATAGTGAA  
>HPV12\_Beta\_396910\_nt6901\_Genome\_Tile|1  
ATTTTCAGTATATCTATTTACAGTGATAATCAAAATGTACACGACATTCCAAATTATGATT  
>HPV12\_Beta\_396910\_nt6921\_Genome\_Tile|1  
AGTGATAATCAAAATGTACACGACATTCCAAATTATGATTCTCAAAAATTTAGAGAATAT  
>HPV12\_Beta\_396910\_nt7101\_Genome\_Tile|1  
TTAGGCTTCGTGCCAACTCCTGACAATCCTATTCATGACACATACAGATATATCGAATCT  
>HPV12\_Beta\_396910\_nt7201\_Genome\_Tile|1  
AGCCGGACCCCTTATGATGGCTTAAGTTTTTGGACTGTAGATATGACTGAGAGACTTTCTT  
>HPV12\_Beta\_396910\_nt7261\_Genome\_Tile|1  
TAGACCTGGATCAGTATTCCTTAGGGCGCAAGTTCTTATTCCAGGCTGGCCTCCAACAAA  
>HPV12\_Beta\_396910\_nt7321\_Genome\_Tile|1  
CGACCGTTAACGGTACAACAAAATCATCAAGCTATAGAAGTTCCATAAGGGGGACCAAAA  
>HPV12\_Beta\_396910\_nt7381\_Genome\_Tile|1  
GAAAACGCAAAACTAAATGTACCGAATTTGGTACAATTACCTCAACTTTTGCACAGTAT  
>HPV12\_Beta\_396910\_nt7581\_Genome\_Tile|1  
TAGGTCGACCGCCAAAGGACCTTTGGTTTGCCAAATAGCTTACAGCAGCTCAGTTCTGGC  
>HPV12\_Beta\_396910\_nt7601\_Genome\_Tile|1  
CTTTGGTTTGCCAAATAGCTTACAGCAGCTCAGTTCTGGCACATTTGTGGACCGATAACG  
>HPV65\_Gamma\_312100\_nt0021\_Genome\_Tile|1  
ACAACCATCATCTAAAGTAATATATAACCGGAAGAGATACATATAAAAAGACACATTGTA  
>HPV65\_Gamma\_312100\_nt0241\_Genome\_Tile|1  
TTAGTTTATGTTTTTCAGGGGGGGTTGCTACTATGCATGCTGTTCTGAATGCTTACGTTTAA  
>HPV65\_Gamma\_312100\_nt0321\_Genome\_Tile|1  
AATTATTTTTCAGTGTTCTATAAAAGCTGTTAATTTGGAAGAAGTAGCTCAAAGGAAAATT  
>HPV65\_Gamma\_312100\_nt0341\_Genome\_Tile|1  
AAAAGCTGTTAATTTGGAAGAAGTAGCTCAAAGGAAAATTAAGGAGATTGCATCAGATG  
>HPV65\_Gamma\_312100\_nt0381\_Genome\_Tile|1  
AAGGAGATTGCATCAGATGTATATGTTGTTTGAGACTACTAGACATTGTTGAGAAATTA  
>HPV65\_Gamma\_312100\_nt0401\_Genome\_Tile|1  
TATATGTTGTTTGAGACTACTAGACATTGTTGAGAAATTAGACTTGCTGTACTCTGACCA  
>HPV65\_Gamma\_312100\_nt0701\_Genome\_Tile|1  
AGGATTACTCTGTTTGCTGTGGAATTTGGACTTCGAGCGTTGGAACAACATCAGTGGAC  
>HPV65\_Gamma\_312100\_nt1381\_Genome\_Tile|1  
TCTTTTCGAGCTGCTGTTGAAGTTTTTGAAAGCTCTAAAATTGTTTTGCAACAGCACTGTA  
>HPV65\_Gamma\_312100\_nt1401\_Genome\_Tile|1  
GTTTTTGGAAGCTCTAAAATTGTTTTGCAACAGCACTGTACATATATTCAAGTTAAAATA  
>HPV65\_Gamma\_312100\_nt1541\_Genome\_Tile|1  
GTTGAATATTCAAGAGTTTCAAATATTGACTGACCCTCCTAAGTTACGAAGTGTGCCTAC  
>HPV65\_Gamma\_312100\_nt1561\_Genome\_Tile|1  
AAATATTGACTGACCCTCCTAAGTTACGAAGTGTGCCTACAGCTTTATACTTCTATAAGC  
>HPV65\_Gamma\_312100\_nt2101\_Genome\_Tile|1  
GAAAATCTCTGTTTTGTTATTCTCTAGTGAAATTTCTTAAAGGTAAAGTAGTATCCTATG  
>HPV65\_Gamma\_312100\_nt2121\_Genome\_Tile|1  
TCTCTAGTGAAATTTCTTAAAGGTAAAGTAGTATCCTATGTGAATCGAAGTAGCCACTTC  
>HPV65\_Gamma\_312100\_nt2801\_Genome\_Tile|1  
CTTATGGATCAGAGCGTTGGACTCTGCCAGAAGTTAGTGCAGAACTGATTAATACTGCTC  
>HPV65\_Gamma\_312100\_nt3541\_Genome\_Tile|1  
TCGTTGAAATGTTGGAGATATAGGAAACAAAATTCCAGTAACTGTGGGTTTCTCTTTATG  
>HPV65\_Gamma\_312100\_nt3561\_Genome\_Tile|1  
TAGGAAACAAAATTCCAGTAACTGTGGGTTTCTCTTTATGAGCACTGTTTGGAACTGGGT  
>HPV65\_Gamma\_312100\_nt3621\_Genome\_Tile|1  
TGGTGATGTGTCAGAAAATCACAGTCGCATGTTAATTGCTTTTAAAAAGTCCTGGTCAGAG  
>HPV65\_Gamma\_312100\_nt3641\_Genome\_Tile|1

ACAGTCGCATGTTAATTGCTTTTAAAAAGTCCTGGTCAGAGAGACTCATTTGTTAAACACA  
>HPV65\_Gamma\_312100\_nt3661\_Genome\_Tile|1  
TTTTAAAGTCCTGGTCAGAGAGACTCATTTGTTAAACACAATCTATTCCCAAACCTCTGT  
>HPV65\_Gamma\_312100\_nt3701\_Genome\_Tile|1  
ATCTATTCCCAAACCTCTGTACATATACCTATGGTTCTTTAAATAGCTTATAAAATGCAA  
>HPV65\_Gamma\_312100\_nt3741\_Genome\_Tile|1  
AAATAGCTTATAAAATGCAAGCCTCACGCAGAACAAAAAGAGACTCAATACCAAACCTCT  
>HPV65\_Gamma\_312100\_nt3761\_Genome\_Tile|1  
GCCTCACGCAGAACAAAAAGAGACTCAATACCAAACCTCTATGCAAAATGTCAATTATCT  
>HPV65\_Gamma\_312100\_nt3921\_Genome\_Tile|1  
GAATTGGGACGGGAAGAGGCAGTGGAGGGTCTTCTGGTTATAATCCACTGGGAGCCCCTA  
>HPV65\_Gamma\_312100\_nt4041\_Genome\_Tile|1  
CTAGTGAAATCATCCCTGTAGATGTTGTAAACCCCTGGCAGTTCTTCTGTGGTTCCTTTAG  
>HPV65\_Gamma\_312100\_nt4061\_Genome\_Tile|1  
GATGTTGTAAACCCTGGCAGTTCCTTCTGTGGTTCCTTTAGAGGATTTAACAGTTCCAGAA  
>HPV65\_Gamma\_312100\_nt4101\_Genome\_Tile|1  
AGGATTTAACAGTTCCAGAAGTCACCATAGATAGCGGGGAGGTGGGAGGAGGTGGTCTTC  
>HPV65\_Gamma\_312100\_nt4141\_Genome\_Tile|1  
GGTGGGAGGAGGTGGTCTTCATCCTTCTGAGATAGATGTTGTCACTTCCTCAGACCCTAT  
>HPV65\_Gamma\_312100\_nt4161\_Genome\_Tile|1  
ATCCTTCTGAGATAGATGTTGTCACTTCCTCAGACCCTATTTAGATGTCACTGGTACAA  
>HPV65\_Gamma\_312100\_nt4261\_Genome\_Tile|1  
TGCAGTCCTAGATGTTTCTCCAACAGAGCCCCCTACCAAACGCATAGCTTTAGGAACTAG  
>HPV65\_Gamma\_312100\_nt4301\_Genome\_Tile|1  
CGCATAGCTTTAGGAACTAGGGGCGCAACATCAACACCACATATAAGTGTAATATCAGGC  
>HPV65\_Gamma\_312100\_nt4501\_Genome\_Tile|1  
AACTAGCACACCACGTGAGACTATTGGACGTGCTTTGGAAAGAGCGCGAGATCTTTATAA  
>HPV65\_Gamma\_312100\_nt4541\_Genome\_Tile|1  
AGAGCGCGAGATCTTTATAACAGAAGAGTGCAGCAGATAGCCACTAGAAATCCAGCAATG  
>HPV65\_Gamma\_312100\_nt5121\_Genome\_Tile|1  
TTTATGTTGATGATGTAGGCTCCGATTTATTTGTATCTTACCCAGAAACAAGAGTTATAC  
>HPV65\_Gamma\_312100\_nt5141\_Genome\_Tile|1  
TCCGATTTATTTGTATCTTACCCAGAAACAAGAGTTATACCTGCGGGAGGCTTACCTACT  
>HPV65\_Gamma\_312100\_nt5161\_Genome\_Tile|1  
CCCAGAAACAAGAGTTATACCTGCGGGAGGCTTACCTACTGAGCCTTTTACCCCGTTAGA  
>HPV65\_Gamma\_312100\_nt5181\_Genome\_Tile|1  
CTGCGGGAGGCTTACCTACTGAGCCTTTTACCCCGTTAGAGCCTCCATTTTTTTTCAGAGT  
>HPV65\_Gamma\_312100\_nt5201\_Genome\_Tile|1  
GAGCCTTTTACCCCGTTAGAGCCTCCATTTTTTTTCAGAGTTTACAGTTCTGACTTTGTA  
>HPV65\_Gamma\_312100\_nt5221\_Genome\_Tile|1  
GCCTCCATTTTTTTTCAGAGTTTTACAGTTCTGACTTTGTATATCGTCCTAGTTTGTATCG  
>HPV65\_Gamma\_312100\_nt6861\_Genome\_Tile|1  
GTCTATTAAACAGTAGATTAATCCTTATAAGAATGCATTTGTTCTGCCAATAGAACTTA  
>HPV65\_Gamma\_312100\_nt6881\_Genome\_Tile|1  
ATCCTTATAAGAATGCATTTGTTCTGCCAATAGAACTTAACTGAGCCAATTATTATAT  
>HPV65\_Gamma\_312100\_nt6921\_Genome\_Tile|1  
AACTGAGCCAATTATTATATAATCTTTGGAAACGTGTATGTATTTGCTTTTTCTGTGAGA  
>HPV65\_Gamma\_312100\_nt6941\_Genome\_Tile|1  
AATCTTTGGAAACGTGTATGTATTTGCTTTTTCTGTGAGAACTTGAGTAAAATAAACTG  
>HPV65\_Gamma\_312100\_nt7081\_Genome\_Tile|1  
TCCACATCCGTTCGGATGCGCGCCAAAAGAGGAACGTCCCCTTCTATTTTTCTAAAAAATT  
>HPV65\_Gamma\_312100\_nt7121\_Genome\_Tile|1  
TTCTATTTTTTCTAAAAAATTACCGTTTCTGCAGCTGCAAAATTGTGTAAGACCGTTATCG  
>HPV65\_Gamma\_312100\_nt7141\_Genome\_Tile|1  
ACCGTTTCTGCAGCTGCAAAATTGTGTAAGACCGTTATCGTTCCCTGTAAACCTTGGCACA

>HPV57\_Alpha\_60882\_nt1821\_Genome\_Tile|1  
ACACTGATAGGACACAGTATGGAGGATGAGCAGTTCAAATTATCTGTTATGGTGCAGTAC  
>HPV57\_Alpha\_60882\_nt1901\_Genome\_Tile|1  
GGACGAGAGCGCACTGGCATTGTGAGTACGCACAGCTGGCGGACGTGGACGCCAATGCGGC  
>HPV57\_Alpha\_60882\_nt2361\_Genome\_Tile|1  
GCGACGGCCAGTGCTGGACGTATATTGATACATATCTTAGGAACCTACTAGATGGCAAT  
>HPV57\_Alpha\_60882\_nt2381\_Genome\_Tile|1  
GTATATTGATACATATCTTAGGAACCTACTAGATGGCAATCCCTTCAGCATAGACAGGAA  
>HPV57\_Alpha\_60882\_nt3741\_Genome\_Tile|1  
CAAAAGTCAGGAACAGCGTGCAGAAATTCCTTACAAGGGTCCATCTACCCAAAGGGGTGAA  
>HPV57\_Alpha\_60882\_nt4081\_Genome\_Tile|1  
GTGACCAACTGCTGCTACCCTGTATATACCTCCCCCTGTATACTGCAATGTATCCTGCT  
>HPV57\_Alpha\_60882\_nt4101\_Genome\_Tile|1  
TGTATATACCTCCCCCTGTATACTGCAATGTATCCTGCTGTGTACAAGGGCACGGGCGG  
>HPV57\_Alpha\_60882\_nt4161\_Genome\_Tile|1  
GTCGTATCCCATTTGCTCCTGTGGGGCCCTGATGATGTGGATTGCTTGTGATTATTCTTTT  
>HPV57\_Alpha\_60882\_nt4181\_Genome\_Tile|1  
GGGGCCCTGATGATGTGGATTGCTTGTGATTATTCTTTTGTGATTGCCATTTTGTGTT  
>HPV57\_Alpha\_60882\_nt4201\_Genome\_Tile|1  
TGCTTGTGATTATTCTTTTGTGATTGCCATTTTGTGTTGATTGCTGTACGTCCGTCTG  
>HPV57\_Alpha\_60882\_nt4221\_Genome\_Tile|1  
GTTGATTGCCATTTTGTGTTGATTGCTGTACGTCCGTCTGCTGCAGTAGTGTACATACTC  
>HPV57\_Alpha\_60882\_nt4241\_Genome\_Tile|1  
TGATGCTGTACGTCCGTCTGCTGCAGTAGTGTACATACTCATTGTGTTTTTGCTACATAC  
>HPV57\_Alpha\_60882\_nt4281\_Genome\_Tile|1  
ATTGTGTTTTTGCTACATACTCATTTTGATACATTTTATCGGTGTGCACCTGATTGCCT  
>HPV57\_Alpha\_60882\_nt4301\_Genome\_Tile|1  
TCATTTTGATACATTTTATCGGTGTGCACCTGATTGCCTTTGTATTGCTACGTGTCAAT  
>HPV57\_Alpha\_60882\_nt4441\_Genome\_Tile|1  
TGGAACGTGCCCCCTGATATCATACTAGGGTGAACAGGACACATTAGCTGATAGGAT  
>HPV57\_Alpha\_60882\_nt4461\_Genome\_Tile|1  
TCATACCTAGGGTGAACAGGACACATTAGCTGATAGGATACTCAAATGGGGCAGCCTGG  
>HPV57\_Alpha\_60882\_nt4601\_Genome\_Tile|1  
CCAACAACCTGTCGTTGATGTAGGACTGGCGCCAAGGCCACCTGTAGTAATAGAACCTGTG  
>HPV57\_Alpha\_60882\_nt4761\_Genome\_Tile|1  
TTACCACCTCAACGGTGACTGACCCTGCAGTCCTGGACATCACTCCTTCGGGTAATGGGG  
>HPV57\_Alpha\_60882\_nt5421\_Genome\_Tile|1  
TATATGCCGAGTCGGATTTCTTGCAACCCTTAGATTTCGGATGTCCCCGCGGCCCTCGAG  
>HPV57\_Alpha\_60882\_nt5441\_Genome\_Tile|1  
TTGCAACCCTTAGATTTCGGATGTCCCCGCGGCCCTCGAGGTACCCTTCCCTGGCAGAC  
>HPV57\_Alpha\_60882\_nt5601\_Genome\_Tile|1  
ACCCGTCTGTAGGCCCTGGTATGGGACCGCTGGTGCCTGTGATACCAGCCATACCATCCT  
>HPV57\_Alpha\_60882\_nt6561\_Genome\_Tile|1  
GAGCTATATGTCAAGAGTTCTACCGTCCAGACCCCGGTAGTTATGTTTATACCTCCACT  
>HPV57\_Alpha\_60882\_nt6761\_Genome\_Tile|1  
TGTCTCTTTGTGTGCCACTGTAACCACAGAACTAATTATAAAGCCTCCAATTATAAGGA  
>HPV57\_Alpha\_60882\_nt6981\_Genome\_Tile|1  
GACACCTACAGGTATTTGCAATCCCAAGCGATAACATGTCAGAAGCCCACACCCCTAAG  
>HPV57\_Alpha\_60882\_nt7181\_Genome\_Tile|1  
CGCCGCTGCAACTGCAGCGGCGCCACTGCTAAACGCAAAAAGGTCAGGCGATAGTGATT  
>HPV57\_Alpha\_60882\_nt7421\_Genome\_Tile|1  
GTTGCACTCTGTAATTGTCCCCGCTGCATGGTTTGCACACTGTGGCCTGTATGTAGCCCC  
>HPV57\_Alpha\_60882\_nt7541\_Genome\_Tile|1  
TCATATCCTTTAATCCTTTAATTGCTTTAATCCTTTCACTTTTTTACTGTGCCAACTAAA  
>HPV57\_Alpha\_60882\_nt7561\_Genome\_Tile|1

ATTGCTTTAATCCTTTTCACTTTTTTACTGTGCCAACTAAAATGATTTTGCTTTTTGATTG  
>HPV57\_Alpha\_60882\_nt7601\_Genome\_Tile|1  
ATGATTTTGCTTTTTGATTGTTTTGTGTCTGCATTAATGCAGTTTTTCTTTTCCAGTGC  
>HPV94\_Alpha\_40804528\_nt3881\_Genome\_Tile|1  
AATTTTGGGTATATGTCAATCTTCTAATTGTCTGTATTGTGACAGTGTATTATCCTGGA  
>HPV94\_Alpha\_40804528\_nt3901\_Genome\_Tile|1  
TCTTCTAATTGTCTGTATTGTGACAGTGTATTATCCTGGATTTTTATTTGTGTAGACTAC  
>HPV94\_Alpha\_40804528\_nt4061\_Genome\_Tile|1  
CCTGGTAGCATTGTATTTTCAAATTGTGTCACGTATACTTCAAAACACATAGGTCTCACA  
>HPV94\_Alpha\_40804528\_nt4181\_Genome\_Tile|1  
GGAGATGTGTATTTACTGCTGTGTATAATATTGTTTGTACTTATGGCATTGTTTGTTTTA  
>HPV94\_Alpha\_40804528\_nt4201\_Genome\_Tile|1  
GTGTATAATATTGTTTGTACTTATGGCATTGTTTGTTTTATATAGACACCTGGGTGTATT  
>HPV94\_Alpha\_40804528\_nt4221\_Genome\_Tile|1  
TTATGGCATTGTTTGTTTTATATAGACACCTGGGTGTATTGTGATATGGATGTAGACGCC  
>HPV94\_Alpha\_40804528\_nt4241\_Genome\_Tile|1  
TATAGACACCTGGGTGTATTGTGATATGGATGTAGACGCCTGTGCATAATCTAATGTTTT  
>HPV94\_Alpha\_40804528\_nt4261\_Genome\_Tile|1  
GTGATATGGATGTAGACGCCTGTGCATAATCTAATGTTTTGTGTGTACCCTTATGTG  
>HPV94\_Alpha\_40804528\_nt4301\_Genome\_Tile|1  
GCTGTGTGTACCCTTATGTGCTATTGTAGCACCTTGTTTTTTTATTCTTTTGTTTTTT  
>HPV94\_Alpha\_40804528\_nt5461\_Genome\_Tile|1  
ATGTTGCCTTTACAAATGGCACTCGAAGTGTCACACCGGCACGGAGCTATAGTACTGCTT  
>HPV94\_Alpha\_40804528\_nt5481\_Genome\_Tile|1  
ACTCGAAGTGTCACACCGGCACGGAGCTATAGTACTGCTTCCCCTTGTCCCTCTACACTT  
>HPV94\_Alpha\_40804528\_nt6541\_Genome\_Tile|1  
GCAAGACATTTTTTCAATAGAGCCAGTGCAGTGGGAGACACCATTCTTGACACTCTAATA  
>HPV94\_Alpha\_40804528\_nt6561\_Genome\_Tile|1  
AGCCAGTGCAGTGGGAGACACCATTCTTGACACTCTAATATTGAAGTCGCCGGTGGTGA  
>HPV94\_Alpha\_40804528\_nt7281\_Genome\_Tile|1  
GAAATGACCCCATGTTTGTGTTTTTATGTATGTGCATATTTGTGTATGTTGTTTGTCTGG  
>HPV94\_Alpha\_40804528\_nt7321\_Genome\_Tile|1  
TGTGTATGTTGTTTGTCTGGTAATTGGTGTATGTTATGTGTACGCTTGTATGTATTTACT  
>HPV94\_Alpha\_40804528\_nt7341\_Genome\_Tile|1  
TAATTGGTGTATGTTATGTGTACGCTTGTATGTATTTACTGTGTATGTATTGTACTGGAA  
>HPV94\_Alpha\_40804528\_nt7361\_Genome\_Tile|1  
TACGCTTGTATGTATTTACTGTGTATGTATTGTACTGGAATGCATGTGTGGATGTGTAAA  
>HPV94\_Alpha\_40804528\_nt7821\_Genome\_Tile|1  
GCTTTCTAGCTTTAATTAATGCAGTTGCTACACGTCTCTTTCCAACATAAATTATAAACT  
>HPV95\_Gamma\_40804520\_nt0001\_Genome\_Tile|1  
AACATTGTTTTCTTAATAATAGTTGGCAACAATCATCTCTTATAATAAAAATATCACCGG  
>HPV95\_Gamma\_40804520\_nt0221\_Genome\_Tile|1  
AGAGCTTGCTTCGTTTTATATTAAGAAATTAAGTTTGGTTTTTAGGGGTAGCTGTTATTA  
>HPV95\_Gamma\_40804520\_nt0341\_Genome\_Tile|1  
GTGTTCTGTATATGCTACTGGACTGGAAGATTTAGTAGGACAAAAATCAGGGATATATG  
>HPV95\_Gamma\_40804520\_nt0361\_Genome\_Tile|1  
GACTGGAAGATTTAGTAGGACAAAAATCAGGGATATATGTGTAAGATGTTTATGCTGTC  
>HPV95\_Gamma\_40804520\_nt0401\_Genome\_Tile|1  
TGTAAGATGTTTATGCTGTCTTAAACTATTAGACATAGTAGAAAACTTGACCTGTTATA  
>HPV95\_Gamma\_40804520\_nt0421\_Genome\_Tile|1  
TTAAACTATTAGACATAGTAGAAAACTTGACCTGTTATACAGTGGTGAGGTGTGCTATT  
>HPV95\_Gamma\_40804520\_nt0541\_Genome\_Tile|1  
AGCACCATCTATTGCAGATGTTGATTTAAACCTCCATGAGTTAGTTGTTCCCTGCAAATTT  
>HPV95\_Gamma\_40804520\_nt0561\_Genome\_Tile|1  
TTGATTTAAACCTCCATGAGTTAGTTGTTCCCTGCAAATTTGCTGAGCGATGAGGTCTTGC



>HPV95\_Gamma\_40804520\_nt0681\_Genome\_Tile|1  
CCTGTTGTTATAATTGTGAAGCAAATGTAAGAATCACTTTGTATGCTGTTGCATTTGGAC  
>HPV95\_Gamma\_40804520\_nt0901\_Genome\_Tile|1  
GCATAGATACTGTGGATGAGTTATTCGACGAAAGTACTGACGGTTCAAATATATCAAATT  
>HPV95\_Gamma\_40804520\_nt1241\_Genome\_Tile|1  
TCAAGATGGCGCAGGGGATATTAACCTTTTGTATTGCAGGACAATAACCGAAGGGCAAC  
>HPV95\_Gamma\_40804520\_nt1261\_Genome\_Tile|1  
TTAACCTTTTGTATTGCAGGACAATAACCGAAGGGCAACTATGCTTGCCAAATTTAAAG  
>HPV95\_Gamma\_40804520\_nt1381\_Genome\_Tile|1  
GTGATAATTGGGTGTTGTTATATTTAAAGCTCCTGTAGAGGTATTGGAAAGTTCTAAGA  
>HPV95\_Gamma\_40804520\_nt1401\_Genome\_Tile|1  
ATATTTAAAGCTCCTGTAGAGGTATTGGAAAGTTCTAAGATCGTCCTTCAACAGCATTGC  
>HPV95\_Gamma\_40804520\_nt1421\_Genome\_Tile|1  
GGTATTGGAAAGTTCTAAGATCGTCCTTCAACAGCATTGCCAATACATTCAAGTAAAGAT  
>HPV95\_Gamma\_40804520\_nt1441\_Genome\_Tile|1  
TCGTCCTTCAACAGCATTGCCAATACATTCAAGTAAAGATATTTGGATTTTCTGCTCTTT  
>HPV95\_Gamma\_40804520\_nt1461\_Genome\_Tile|1  
CAATACATTCAAGTAAAGATATTTGGATTTCTGCTCTTTATTATTACAATTTAAGAGT  
>HPV95\_Gamma\_40804520\_nt1501\_Genome\_Tile|1  
ATTTATTACAATTTAAGAGTTCCAAAAGTAGAGAGACTGTTTATAAGTTATTATGTTTCGT  
>HPV95\_Gamma\_40804520\_nt1521\_Genome\_Tile|1  
TCCAAAAGTAGAGAGACTGTTTATAAGTTATTATGTTTCGTTGTTAAATATACAAGAGTTT  
>HPV95\_Gamma\_40804520\_nt1661\_Genome\_Tile|1  
CTTTGTATATGGACAAACACCGGATTGGATCGCTAAGCAGACAATAGTGAGCCATCAGTC  
>HPV95\_Gamma\_40804520\_nt1701\_Genome\_Tile|1  
ACAATAGTGAGCCATCAGTCTGCTACAACCTGCAGAAACATTTGAGTTGTCAAGAATGGTT  
>HPV95\_Gamma\_40804520\_nt2141\_Genome\_Tile|1  
CTCATTGATAAAGTTTTTAAGGGGAAAAGTAGTGTATATGTGAATAGAACTAGTCAATT  
>HPV95\_Gamma\_40804520\_nt2701\_Genome\_Tile|1  
GCACGAAAACAAGGGCTGACTAAATTGGGTCTTCAACCCCTTCCTTCACTTTTAGCAAGT  
>HPV95\_Gamma\_40804520\_nt2741\_Genome\_Tile|1  
TTCCTTCACTTTTAGCAAGTGAATACAATGCAAAACAAGCAATACAGATACAGCTAACAT  
>HPV95\_Gamma\_40804520\_nt2781\_Genome\_Tile|1  
AATACAGATACAGCTAACATTACTATCATTATTAAAGTCGCCCTATGCTTCTGAACCTTG  
>HPV95\_Gamma\_40804520\_nt2801\_Genome\_Tile|1  
TACTATCATTATTAAAGTCGCCCTATGCTTCTGAACCTTGACATTACCAGAAGTCAGTG  
>HPV95\_Gamma\_40804520\_nt2821\_Genome\_Tile|1  
CCCTATGCTTCTGAACCTTGACATTACCAGAAGTCAGTGCAGAATTGATTAACACGCCC  
>HPV95\_Gamma\_40804520\_nt2841\_Genome\_Tile|1  
GACATTACCAGAAGTCAGTGCAGAATTGATTAACACGCCCCCTCAGAACGTTTTAAAAAA  
>HPV95\_Gamma\_40804520\_nt2861\_Genome\_Tile|1  
CAGAATTGATTAACACGCCCCCTCAGAACGTTTTAAAAAAGGGGGGTATGATGTAACCTG  
>HPV95\_Gamma\_40804520\_nt2941\_Genome\_Tile|1  
AACAATACAATGGTATATACAACTGGACTGCTTTGTATTATCAAGATGCAAATGAAATA  
>HPV95\_Gamma\_40804520\_nt3221\_Genome\_Tile|1  
CCAGCAACACCAAACTACCAAGCAGACGTCCCCTCGGGGAAGGGGATCGCAGTCGAGGG  
>HPV95\_Gamma\_40804520\_nt3561\_Genome\_Tile|1  
ATTGAAATGCTGGAGATATAGAAAATACTTCAAATTCTTGTGGCTTCCTTTATATGAG  
>HPV95\_Gamma\_40804520\_nt3641\_Genome\_Tile|1  
GGGATTCCTCAGAAAATCATAGTCGAATGTTAATAGCTTTTACCAGTACAGACCAGAGAG  
>HPV95\_Gamma\_40804520\_nt3661\_Genome\_Tile|1  
AGTCGAATGTTAATAGCTTTTACCAGTACAGACCAGAGAGATTACTTTGTAAAGCATCAC  
>HPV95\_Gamma\_40804520\_nt3701\_Genome\_Tile|1  
ATTACTTTGTAAAGCATCACTTCTTCCCCAGACAGTGCACATATACATTTGGTTCTCTGA  
>HPV95\_Gamma\_40804520\_nt3741\_Genome\_Tile|1

ATATACATTTGGTTCTCTGAACAGCCTGTAAATGAATTCTGCACGGAGAGTAAAGCGAG  
>HPV95\_Gamma\_40804520\_nt3761\_Genome\_Tile|1  
ACAGCCTGTAAATGAATTCTGCACGGAGAGTAAAGCGAGACTCAGTCCCTAATCTTTAT  
>HPV95\_Gamma\_40804520\_nt3781\_Genome\_Tile|1  
TGCACGGAGAGTAAAGCGAGACTCAGTCCCTAATCTTTATGCAAAATGTCAACTTTTCAGG  
>HPV95\_Gamma\_40804520\_nt3981\_Genome\_Tile|1  
ATCCACTAGCGACCCCAAGTAGAGTTACCCCTAGTGGAACCTCTAGTAAGACCCACAGTTC  
>HPV95\_Gamma\_40804520\_nt4041\_Genome\_Tile|1  
CAGTAGAAGGTCTGGGCCCCGGTTGAAATAGTTCCTGTTGATGCAGTAGATCCTGCAGGCT  
>HPV95\_Gamma\_40804520\_nt4061\_Genome\_Tile|1  
GTTGAAATAGTTCCTGTTGATGCAGTAGATCCTGCAGGCTCCTCCATTGTCCCGCTCACT  
>HPV95\_Gamma\_40804520\_nt4081\_Genome\_Tile|1  
TGCAGTAGATCCTGCAGGCTCCTCCATTGTCCCGCTCACTGATGTGTCTGTTCCCGAGGT  
>HPV95\_Gamma\_40804520\_nt4101\_Genome\_Tile|1  
CCTCCATTGTCCCGCTCACTGATGTGTCTGTTCCCGAGGTGGTTGTGGATGGCGAAGGTG  
>HPV95\_Gamma\_40804520\_nt4121\_Genome\_Tile|1  
GATGTGTCTGTTCCCGAGGTGGTTGTGGATGGCGAAGGTGGGGCAATAGATTTAGGACCA  
>HPV95\_Gamma\_40804520\_nt4141\_Genome\_Tile|1  
GGTTGTGGATGGCGAAGGTGGGGCAATAGATTTAGGACCACCCGAAGATACAGGAGTCAC  
>HPV95\_Gamma\_40804520\_nt4161\_Genome\_Tile|1  
GGGCAATAGATTTAGGACCACCCGAAGATACAGGAGTCACATCTCGCCCTCCTGAAATAT  
>HPV95\_Gamma\_40804520\_nt4241\_Genome\_Tile|1  
TCAGATGTTTCAGGTACCAACAGCCACCCAACAATAATTTTCAGGAGAAGATAACACAATA  
>HPV95\_Gamma\_40804520\_nt4281\_Genome\_Tile|1  
CAGGAGAAGATAACACAATAGCTGTGTTAGACATATCTCCAATAGAGCCCCCACAAC  
>HPV95\_Gamma\_40804520\_nt4301\_Genome\_Tile|1  
GCTGTGTTAGACATATCTCCAATAGAGCCCCCACAACCGTATAGCCTTGGGCACACGT  
>HPV95\_Gamma\_40804520\_nt4321\_Genome\_Tile|1  
AATAGAGCCCCCACAACCGTATAGCCTTGGGCACACGTGGCCAGTCATCAACGCCACA  
>HPV95\_Gamma\_40804520\_nt4461\_Genome\_Tile|1  
ATTCTATTGGTTATACAGAGGAAATCCCCTTGCAGGATCTGAACACTATCCAGGAATTTG  
>HPV95\_Gamma\_40804520\_nt4561\_Genome\_Tile|1  
AATAGCCCGCGCAATAGGGAGGGCGCGAGAATTATATAATAGAAGAGTGCAACAAATTCA  
>HPV95\_Gamma\_40804520\_nt4761\_Genome\_Tile|1  
CTGACATTGTCACAATAGGTCGCCCACAATTTTCAGAAACAGAGAGTGACAAATTCGTG  
>HPV95\_Gamma\_40804520\_nt4801\_Genome\_Tile|1  
AGAGAGTGGACAAATTCGTGTTAGTAGATTAGGACGCAGGGGCACCATACAGACTAGAAG  
>HPV95\_Gamma\_40804520\_nt4821\_Genome\_Tile|1  
TTAGTAGATTAGGACGCAGGGGCACCATACAGACTAGAAGTGGTATACAAATTGGTCAAG  
>HPV95\_Gamma\_40804520\_nt4841\_Genome\_Tile|1  
GGCACCATACAGACTAGAAGTGGTATACAAATTGGTCAAGCAGTACATTTCTATTATGAT  
>HPV95\_Gamma\_40804520\_nt4861\_Genome\_Tile|1  
TGGTATACAAATTGGTCAAGCAGTACATTTCTATTATGATTTAAGCACCATTGATACAGC  
>HPV95\_Gamma\_40804520\_nt4881\_Genome\_Tile|1  
CAGTACATTTCTATTATGATTTAAGCACCATTGATACAGCAGATGCAATAGAATTGTCTA  
>HPV95\_Gamma\_40804520\_nt4901\_Genome\_Tile|1  
TTAAGCACCATTGATACAGCAGATGCAATAGAATTGTCTACTTTAGGACAACATTCAGGA  
>HPV95\_Gamma\_40804520\_nt4921\_Genome\_Tile|1  
AGATGCAATAGAATTGTCTACTTTAGGACAACATTCAGGAGACCAGAGTATCGTAGATGC  
>HPV95\_Gamma\_40804520\_nt4941\_Genome\_Tile|1  
CTTTAGGACAACATTCAGGAGACCAGAGTATCGTAGATGCAATGGCAGAAAGTAGCTTGA  
>HPV95\_Gamma\_40804520\_nt4961\_Genome\_Tile|1  
GACCAGAGTATCGTAGATGCAATGGCAGAAAGTAGCTTGATAGATCCTTTTCGCTACACCT  
>HPV95\_Gamma\_40804520\_nt5021\_Genome\_Tile|1  
GATACCACTGTTGCAGAGGAACAGCAATTATTGGATCCTCAAACCTGAGGATTTTAGTAAT

>HPV95\_Gamma\_40804520\_nt5041\_Genome\_Tile|1  
ACAGCAATTATTGGATCCTCAAAGTGGAGATTTTAGTAATTCTCATTTAGTACTAACTAC  
>HPV95\_Gamma\_40804520\_nt5061\_Genome\_Tile|1  
AAACTGAGGATTTTAGTAATTCTCATTTAGTACTAACTACTAGTAACAGAGGTTCAACTT  
>HPV95\_Gamma\_40804520\_nt5081\_Genome\_Tile|1  
TCTCATTTAGTACTAACTACTAGTAACAGAGGTTCAACTTTGACTATTCCCTACTATTCCT  
>HPV95\_Gamma\_40804520\_nt5101\_Genome\_Tile|1  
TAGTAACAGAGGTTCAACTTTGACTATTCCCTACTATTCCTCCAGGAATTGGTCTACGAAT  
>HPV95\_Gamma\_40804520\_nt5121\_Genome\_Tile|1  
TGACTATTCCCTACTATTCCTCCAGGAATTGGTCTACGAATTTATGTAGATGATATTGGTT  
>HPV95\_Gamma\_40804520\_nt5201\_Genome\_Tile|1  
CCAGAATCAAGCTTAATTCCTCCTGGAGGATTACCAACTGAACCATTTTTCCCTCTGAAG  
>HPV95\_Gamma\_40804520\_nt5241\_Genome\_Tile|1  
AACCATTTTTCCCTCTGAAGCCAGCATTATTAACAGATTTTTTACAGTGATTTCACTTATT  
>HPV95\_Gamma\_40804520\_nt5261\_Genome\_Tile|1  
CCAGCATTATTAACAGATTTTTTACAGTGATTTCACTTATTATCCTAGCTTATATCGCAA  
>HPV95\_Gamma\_40804520\_nt5281\_Genome\_Tile|1  
TTACAGTGATTTCACTTATTATCCTAGCTTATATCGCAAAAACGAAACGATCAGATCT  
>HPV95\_Gamma\_40804520\_nt5301\_Genome\_Tile|1  
ATCCTAGCTTATATCGCAAAAACGAAACGATCAGATCTGTTCTGACTTTGTTTTTTTA  
>HPV95\_Gamma\_40804520\_nt5321\_Genome\_Tile|1  
AAACGAAACGATCAGATCTGTTCTGACTTTGTTTTTTTACAGAAAAATGACGAGTTGGT  
>HPV95\_Gamma\_40804520\_nt5541\_Genome\_Tile|1  
ACCTAAGAAAGTTTTAGTTCCAAAGGTATCTGGAAGTCAATATAGAGTCTTTAGGTTTCA  
>HPV95\_Gamma\_40804520\_nt5801\_Genome\_Tile|1  
GACAGGATGTCTCATTAGACCCTAAACAGACCCAAATGTTTATAATTGGTTGTATTCCAG  
>HPV95\_Gamma\_40804520\_nt5841\_Genome\_Tile|1  
CATAATTGGTTGTATTCCAGCTATTGGGGAGCACTGGGATAAAGCTGAGGCATGCAGAGA  
>HPV95\_Gamma\_40804520\_nt6021\_Genome\_Tile|1  
ATCCAGTGCACCATTAGATGTAGTTGGTACTTTGTGTAAATGGCCTGACTTCTTAAAGAT  
>HPV95\_Gamma\_40804520\_nt6041\_Genome\_Tile|1  
TAGTTGGTACTTTGTGTAAATGGCCTGACTTCTTAAAGATGAGTAAGGACATTTATGGTG  
>HPV95\_Gamma\_40804520\_nt6081\_Genome\_Tile|1  
GAGTAAGGACATTTATGGTGACAGTTTATTCTTCTTTGGCCGAAGGGAACAGCTTTATGC  
>HPV95\_Gamma\_40804520\_nt6101\_Genome\_Tile|1  
ACAGTTTATTCTTCTTTGGCCGAAGGGAACAGCTTTATGCAAGACACTTTTTTGTAGAG  
>HPV95\_Gamma\_40804520\_nt6161\_Genome\_Tile|1  
CTGGGACAATGGGTGATGCGTTACCAGAGCCTTTTGAAGTGAAGTCTGATTACATAATTG  
>HPV95\_Gamma\_40804520\_nt6181\_Genome\_Tile|1  
TTACCAGAGCCTTTTGAAGTGAAGTCTGATTACATAATTGCTGCTCAGAGTAACCAAGAA  
>HPV95\_Gamma\_40804520\_nt6201\_Genome\_Tile|1  
GAAGTCTGATTACATAATTGCTGCTCAGAGTAACCAAGAACAAAATAATCTTGGCCCTCA  
>HPV95\_Gamma\_40804520\_nt6221\_Genome\_Tile|1  
CTGCTCAGAGTAACCAAGAACAAAATAATCTTGGCCCTCACATTTATTTTGGAACCTCTA  
>HPV95\_Gamma\_40804520\_nt6241\_Genome\_Tile|1  
CAAAATAATCTTGGCCCTCACATTTATTTTGGAACCTCTAGCGGTTCTCTGTATCAAGT  
>HPV95\_Gamma\_40804520\_nt6261\_Genome\_Tile|1  
CATTTATTTTGGAACCTCTAGCGGTTCTCTGTATCAAGTGAATCTCAGCTTTTTTAACCG  
>HPV95\_Gamma\_40804520\_nt6361\_Genome\_Tile|1  
ATTTGTTGGGATAATCAGCTTTTTGTAACTCTGGTTGATAATACCCATAACACTAATTT  
>HPV95\_Gamma\_40804520\_nt6381\_Genome\_Tile|1  
TTTTGTAACTCTGGTTGATAATACCCATAACACTAATTTACTATTTCTGTAAAGCATGA  
>HPV95\_Gamma\_40804520\_nt6401\_Genome\_Tile|1  
ATACCCATAACACTAATTTACTATTTCTGTAAAGCATGAAGGAGAGGATAACAATTATA  
>HPV95\_Gamma\_40804520\_nt6421\_Genome\_Tile|1

ACTATTTCTGTAAAGCATGAAGGAGAGGATAACAATTATACATATAAAGCAAATGATTTT  
>HPV95\_Gamma\_40804520\_nt6541\_Genome\_Tile|1  
GTGCTCTTACAGCAGATGTAATGGCTCATTTGAATGTCATGAACCCAAATATATTAGAT  
>HPV95\_Gamma\_40804520\_nt6641\_Genome\_Tile|1  
TTGAGGATCAATACAGATTCATTACATCCAGAGCTACTCGTTGTCCAACCTCAAATCCAC  
>HPV95\_Gamma\_40804520\_nt6661\_Genome\_Tile|1  
ATTACATCCAGAGCTACTCGTTGTCCAACCTCAAATCCACCAGCAGAAAGAGAAGACCCT  
>HPV95\_Gamma\_40804520\_nt6681\_Genome\_Tile|1  
TTGTCCAACCTCAAATCCACCAGCAGAAAGAGAAGACCCTTTTAAAGATTTGTCCTTTTG  
>HPV95\_Gamma\_40804520\_nt6721\_Genome\_Tile|1  
TTTAAAGATTTGTCCTTTTGGACAGTTGATCTTTCTGAGCGTTTTTCTTCAGAATTAAGC  
>HPV95\_Gamma\_40804520\_nt6801\_Genome\_Tile|1  
GTTTCTCTATCAGAGTGGATTAATAAATGGATCTCGTAAAGACAAAGAGCTATTACTTC  
>HPV95\_Gamma\_40804520\_nt6901\_Genome\_Tile|1  
CGTTTATCTAAGTAACCATGTAAATACATAATGGAATGTATTATTTCTGCCAGGAAAAAG  
>HPV95\_Gamma\_40804520\_nt6921\_Genome\_Tile|1  
TAAATACATAATGGAATGTATTATTTCTGCCAGGAAAAAGTGCATATTGAGCCAATTATT  
>HPV95\_Gamma\_40804520\_nt6941\_Genome\_Tile|1  
TTATTTCTGCCAGGAAAAAGTGCATATTGAGCCAATTATTATATAACCTATTGAAGGATA  
>HPV95\_Gamma\_40804520\_nt6981\_Genome\_Tile|1  
ATATAACCTATTGAAGGATAAAAATTATAAATCTTTTAAATGTGAATGCAATAAACTATA  
>HPV95\_Gamma\_40804520\_nt7001\_Genome\_Tile|1  
AAAATTATAAATCTTTTAAATGTGAATGCAATAAACTATACCTCCAATTACTATTGTGTC  
>HPV95\_Gamma\_40804520\_nt7061\_Genome\_Tile|1  
CATGCTTTGTGACTCATGTGGTCAATATTGTGTCCGCACCCTGATTACTTGGACTGCCTC  
>HPV95\_Gamma\_40804520\_nt7081\_Genome\_Tile|1  
GTCAATATTGTGTCCGCACCCTGATTACTTGGACTGCCTCCACATTAAGTAAGACGCTGG  
>HPV95\_Gamma\_40804520\_nt7101\_Genome\_Tile|1  
CTGATTACTTGGACTGCCTCCACATTAAGTAAGACGCTGGCGAAGAAAAGAGACGCTCCT  
>HPV95\_Gamma\_40804520\_nt7121\_Genome\_Tile|1  
CACATTAAGTAAGACGCTGGCGAAGAAAAGAGACGCTCCTTATTTTTTTTGGAAAAAATA  
>HPV95\_Gamma\_40804520\_nt7181\_Genome\_Tile|1  
TTGAATTTGGCATTATTAGGCGGGAACAGGACCGGATTTCGTTTCGCTATTTCAGGAGTT  
>HPV95\_Gamma\_40804520\_nt7201\_Genome\_Tile|1  
CGGGAAACAGGACCGGATTTCGTTTCGCTATTTCAGGAGTTAAAGGTAGGTGAAAGTTTTA  
>HPV81\_Alpha\_40804509\_nt0101\_Genome\_Tile|1  
TATGGTCAGCACAGCAGTGATGTCGCTGGGGCCAGCAAATCCTACCAATTTGTTTTTGCT  
>HPV81\_Alpha\_40804509\_nt0441\_Genome\_Tile|1  
CCGTTAACATACCAAGAAAAGGAGTATCTTGTGACAGGCCTAATCCACTTTCATAAAATA  
>HPV81\_Alpha\_40804509\_nt0921\_Genome\_Tile|1  
GGCTGTTGTAGAAAAAACCACAGGGTATCAGGAATCAAGTGATGAAGAGGAAGATAGTGC  
>HPV81\_Alpha\_40804509\_nt0941\_Genome\_Tile|1  
CAGGGTATCAGGAATCAAGTGATGAAGAGGAAGATAGTGCAGATACAGGAGAGGATCTAG  
>HPV81\_Alpha\_40804509\_nt0961\_Genome\_Tile|1  
GATGAAGAGGAAGATAGTGCAGATACAGGAGAGGATCTAGTAGATTTCATAGATACACGA  
>HPV81\_Alpha\_40804509\_nt1381\_Genome\_Tile|1  
GTGCATTTACAACAAACCCAGGAAGGTACAGCAAGTATAGTAGAGCTGTTGAAGGCCAGA  
>HPV81\_Alpha\_40804509\_nt2301\_Genome\_Tile|1  
GAGTTTAGTGCAATTTCTAGGGGGTGCAGTTATTTCCCTACGTAAATGCATCAAGTCATTT  
>HPV81\_Alpha\_40804509\_nt2421\_Genome\_Tile|1  
TTGGGTGTACATAGATACACATTTACGTAGTGTGGTAGATGGTAACTTAATAAGTATGGA  
>HPV81\_Alpha\_40804509\_nt2441\_Genome\_Tile|1  
ATTTACGTAGTGTGGTAGATGGTAACTTAATAAGTATGGACAGAAAAACATAGGAATTTAG  
>HPV81\_Alpha\_40804509\_nt2481\_Genome\_Tile|1  
CAGAAAAACATAGGAATTTAGCACAACTAAAATGCCCCCATTACTGATTACAACAACT

>HPV81\_Alpha\_40804509\_nt2501\_Genome\_Tile|1  
CACAACTAAAAATGCCCCCATTACTGATTACAACATAAATCCATTAGAAGACGTTA  
>HPV81\_Alpha\_40804509\_nt2521\_Genome\_Tile|1  
TTACTGATTACAACATAAATCCATTAGAAGACGTTACCCTAAAATATTTACATAGT  
>HPV81\_Alpha\_40804509\_nt2541\_Genome\_Tile|1  
AAATCCATTAGAAGACGTTACCCTAAAATATTTACATAGTAGAATGGCAGTGTTTAGCTT  
>HPV81\_Alpha\_40804509\_nt3521\_Genome\_Tile|1  
CCCCGACACTGCACCACCGAACATCTGGGTGGACAATAACAAATCAGGGGCCGACGGTTAC  
>HPV81\_Alpha\_40804509\_nt3741\_Genome\_Tile|1  
GAGAGGCAACGCAAAAGTGTGCATTTGTAAACAATATGGTATGCTAATGAAGACCAACGTG  
>HPV81\_Alpha\_40804509\_nt3821\_Genome\_Tile|1  
ACAATACCAAAGGCATACAAGCCATGCAGGGCTTTATGTCTATGTGTTTGTA AAAACAT  
>HPV81\_Alpha\_40804509\_nt3881\_Genome\_Tile|1  
ATTTGTGTATAAATGTGTACTGTAAACATACATATGTATATGGTGAAATGGTATAGTGAAA  
>HPV81\_Alpha\_40804509\_nt3901\_Genome\_Tile|1  
TGTAACATACATATGTATATGGTGAAATGGTATAGTGAACTTATTGTTCTTGCTGTATT  
>HPV81\_Alpha\_40804509\_nt4221\_Genome\_Tile|1  
GCTGCTACAGTGTATATAGGTAGTTAGTATGTATCCTGTTATGGTCCGCACCCATACTGG  
>HPV81\_Alpha\_40804509\_nt4261\_Genome\_Tile|1  
ATGGTCCGCACCCATACTGGGGGCACAGATATAGTGGTGTGTTGACATGGATAATAGTGGG  
>HPV81\_Alpha\_40804509\_nt4281\_Genome\_Tile|1  
GGGCACAGATATAGTGGTGTGTTGACATGGATAATAGTGGGTATGGTTTTTGTGTTGTAT  
>HPV81\_Alpha\_40804509\_nt4341\_Genome\_Tile|1  
TATACTTGCCTTAATACTTTTTGTAGTGTATAAACTGTTACAACGTAACTGCACATTGT  
>HPV81\_Alpha\_40804509\_nt4361\_Genome\_Tile|1  
TTGTAGTGTATAAACTGTTACAACGTAACTGCACATTGTTTTGTACTATAATTTTGCTA  
>HPV81\_Alpha\_40804509\_nt4421\_Genome\_Tile|1  
CATATTTTTTAATAAATACATTGTATACTCTATTGTATACCATGCCAAAGGTATTGCACC  
>HPV81\_Alpha\_40804509\_nt4661\_Genome\_Tile|1  
GCACGGGCTACATCCCTATAGGTGGCCGTCCCCCTTCTGTAGTTGATATAGGTCCTGTGT  
>HPV81\_Alpha\_40804509\_nt4881\_Genome\_Tile|1  
CCTAGATATTACTCCCACAGGTACTACAGTGCAGGTTAGTAGCACTAACTTTTTAAATCC  
>HPV81\_Alpha\_40804509\_nt5541\_Genome\_Tile|1  
CCAACATTTAGATGCTGTTTTGCAGTCTGTGCCCTCTTTGTCTTCCAGGTCCTCTGTTTC  
>HPV81\_Alpha\_40804509\_nt5601\_Genome\_Tile|1  
AGGCTCTGCCACTTTATCTGCTACCTCTGTGGCCTCCTCATATAATACCACCGTTCCTTT  
>HPV81\_Alpha\_40804509\_nt5621\_Genome\_Tile|1  
CTACCTCTGTGGCCTCCTCATATAATACCACCGTTCCTTTGTCTTCTGGGTTTACCATCC  
>HPV81\_Alpha\_40804509\_nt5681\_Genome\_Tile|1  
CTGCCTCTACTGGGCCTGATGTAGAATTGCCTTATGCTCCTTTAGCCCCCTTCTATAGTCC  
>HPV81\_Alpha\_40804509\_nt5721\_Genome\_Tile|1  
TTTAGCCCCCTTCTATAGTCCCTTCGTTTCTGCAACTACCCCGTACGCCATATATGTTGT  
>HPV81\_Alpha\_40804509\_nt5741\_Genome\_Tile|1  
CTTCGTTTCCTGCAACTACCCCGTACGCCATATATGTTGTTGGCACTGATTTTTACTTGT  
>HPV81\_Alpha\_40804509\_nt5781\_Genome\_Tile|1  
TGGCACTGATTTTTACTTGTTCCTTCTTATATATTCTTCCCTAAAAAACATAAACGTAT  
>HPV81\_Alpha\_40804509\_nt5981\_Genome\_Tile|1  
CTTCTTACTGTAGGGCATCCATATTGTACATTAACCTATTGGTACCCAAGGAAAGCGTTCC  
>HPV81\_Alpha\_40804509\_nt6361\_Genome\_Tile|1  
CTGGGCCCCGGGTACCTTTTTGTGCTAATGTGCTCCAGCACAAAACGAATGCCCCCCTT  
>HPV81\_Alpha\_40804509\_nt6381\_Genome\_Tile|1  
GTGCTAATGTTGCTCCAGCACAAAACGAATGCCCCCCTTGGAGTTTAAAAATACAACCA  
>HPV81\_Alpha\_40804509\_nt6661\_Genome\_Tile|1  
CGAGGCCTTACCTGCAGACTTATATATGAAGGTGCTGCAGGCAGTGACAGAATAACCCC  
>HPV81\_Alpha\_40804509\_nt7321\_Genome\_Tile|1

TGCGTCTGCCAGGACCCCCACTACCTCTGCTAAGCGAAAACGTAAAAAATAGTAGTATGC  
>HPV81\_Alpha\_40804509\_nt7341\_Genome\_Tile|1  
CTACCTCTGCTAAGCGAAAACGTAAAAAATAGTAGTATGCTTGTGCTGTGTGCTTG  
>HPV81\_Alpha\_40804509\_nt7381\_Genome\_Tile|1  
TTGTTTGTGCTGTGTGCTTGTGTGTATGTATTTGCATTGTTTTGTGTTGTTTGTATTATA  
>HPV81\_Alpha\_40804509\_nt7601\_Genome\_Tile|1  
GTGTGTGTGTGTTTGTGTTTATGTGTTTGTACGCCCTTGCACACTTTGTATTTCCCTTACCACT  
>HPV81\_Alpha\_40804509\_nt7661\_Genome\_Tile|1  
CCTTGCAGTAGTGCCTCCATTTTACATACCTCCATTTTAAACCGAAACGTTGCAGGACCG  
>HPV81\_Alpha\_40804509\_nt7961\_Genome\_Tile|1  
ATTGCTGGTTTGGCTTTTTTACATGTTTTACACGCCAACAATATGTCATGTAAACTTAGG  
>HPV81\_Alpha\_40804509\_nt7981\_Genome\_Tile|1  
ACATGTTTTACACGCCAACAATATGTCATGTAAACTTAGGCAAGCTTTGTGCAAACCTGT  
>HPV43\_Alpha\_40804474\_nt0281\_Genome\_Tile|1  
GTTTGTGCTGCATGCTTGGCCTGTCTACAGTTTCATGGAAAAATAAGTCAATATAGGCACTT  
>HPV43\_Alpha\_40804474\_nt0361\_Genome\_Tile|1  
ATACTGTAGAAGAAGAACTAAGCAAACAGTGTTTGATTTGTGCATTAGATGCTGTAAGT  
>HPV43\_Alpha\_40804474\_nt0441\_Genome\_Tile|1  
GTGGAAAAAGTACAGCATATTGTGCAAAAGGCACAATTCTTTAAAATACATAGCGTGTGG  
>HPV43\_Alpha\_40804474\_nt0461\_Genome\_Tile|1  
TGTGCAAAAGGCACAATTCTTTAAAATACATAGCGTGTGGAAAGGATACTGCCTACATTG  
>HPV43\_Alpha\_40804474\_nt1001\_Genome\_Tile|1  
CATTAGAAGACAGTTGTACAGACCACAGCAGTGCAGGCTCTGTAAATGCACAACAAG  
>HPV43\_Alpha\_40804474\_nt2201\_Genome\_Tile|1  
ATCAACATATAGACATTATAGCATTTCTAGGTGCTTTAAAAAATGGTTACATGGTATAC  
>HPV43\_Alpha\_40804474\_nt2921\_Genome\_Tile|1  
CCACAGCTAGAAGTATCAAGACAAAAGCATATTTGGCTATTGAATTACAAATGTCATTA  
>HPV43\_Alpha\_40804474\_nt3201\_Genome\_Tile|1  
ACTATGAAGGCCTATCATACACAGTATGTGGGCAAAAGCACTATTATGTAGAATTTCTATA  
>HPV43\_Alpha\_40804474\_nt3761\_Genome\_Tile|1  
TTAACATATATTAGTGAACAACAGAGGGCTGACTTTTTGTCTCGTGTTAAAATACCTATA  
>HPV43\_Alpha\_40804474\_nt3801\_Genome\_Tile|1  
CTCGTGTTAAAATACCTATAACTATTAAACAGTGCCTGGGAGCATTAACAATGATGTAAA  
>HPV43\_Alpha\_40804474\_nt3961\_Genome\_Tile|1  
ATTGTTTATAGATGACAAGCTTGGCATATTAACTTAACATTTTTATTTGCATTCTTGC  
>HPV43\_Alpha\_40804474\_nt4081\_Genome\_Tile|1  
TTCTATCTTTTATTTTTTGTCTTGGGGCGTCCTTACATCACCTATTAACGTTTTTATATT  
>HPV43\_Alpha\_40804474\_nt4101\_Genome\_Tile|1  
CTTGGGGCGTCCTTACATCACCTATTAACGTTTTTATATTGGCGTTGTTAGTGTGGTATT  
>HPV43\_Alpha\_40804474\_nt4121\_Genome\_Tile|1  
CCTATTAACGTTTTTATATTGGCGTTGTTAGTGTGGTATTTGCCAGCCCTTTTATTGCAT  
>HPV43\_Alpha\_40804474\_nt4181\_Genome\_Tile|1  
TGGTATATTATATCTGCTATTGCATAACAGTAAATATGTTAACCTGTACATTTGAAGATG  
>HPV43\_Alpha\_40804474\_nt4261\_Genome\_Tile|1  
TGGTACTTGTAACAGTTATAACTGTATTAAATATTGGTGTAGCGTTTCATTACAGAACA  
>HPV43\_Alpha\_40804474\_nt4281\_Genome\_Tile|1  
AACTGTATTAATATTGGTGTTAGCGTTTCATTACAGAACCTTAAGTTGCATCAGTCCTC  
>HPV43\_Alpha\_40804474\_nt4301\_Genome\_Tile|1  
TAGCGTTTCATTACAGAACACTTAAGTTGCATCAGTCCTCCAGCAAATAACAATCCTTT  
>HPV43\_Alpha\_40804474\_nt4701\_Genome\_Tile|1  
CTATTGTGTCCTTAATTGAGGAATCAAGCATAATTCAGTCCGGGCTCCTATTACCAATA  
>HPV43\_Alpha\_40804474\_nt4781\_Genome\_Tile|1  
GAGGTAACCTCCTCTGGATCAGAGGTTCTTGCAATTTTAGATGTTCCCCATCTACTTCA  
>HPV43\_Alpha\_40804474\_nt4801\_Genome\_Tile|1  
AGAGGTTCTGCAATTTTAGATGTTTCCCCATCTACTTCAGTGCATATTACTACATCTAC

>HPV43\_Alpha\_40804474\_nt4821\_Genome\_Tile|1  
ATGTTTCCCCATCTACTTCAGTGCATATTACTACATCTACACATTTAAATCCTGCATTTA  
>HPV43\_Alpha\_40804474\_nt4921\_Genome\_Tile|1  
TGGGGGACGTATTATAATATCTCACTCCACTGTTACTGCTGATAGTGCTGAACAAATTCC  
>HPV43\_Alpha\_40804474\_nt4941\_Genome\_Tile|1  
CTCACTCCACTGTTACTGCTGATAGTGCTGAACAAATTCCTATGGATACGTTTGTATAC  
>HPV43\_Alpha\_40804474\_nt4981\_Genome\_Tile|1  
TATGGATACGTTTGTATACACAGCGATCCTACCACTAGCACACCTATTCCAGGCACTGC  
>HPV43\_Alpha\_40804474\_nt5361\_Genome\_Tile|1  
GTTCCATACCCACAGAGGAATCAATAGAAATTGCAGCCCCTAGGACGTTCCCAGTCCTTTC  
>HPV43\_Alpha\_40804474\_nt5381\_Genome\_Tile|1  
TCAATAGAAATTGCAGCCCCTAGGACGTTCCAGTCCTTTCCTACTGTTTCTGATACTAGT  
>HPV43\_Alpha\_40804474\_nt5401\_Genome\_Tile|1  
AGGACGTTCCCAGTCCTTTCCTACTGTTTCTGATACTAGTGATTTATATGATATATATGC  
>HPV43\_Alpha\_40804474\_nt5441\_Genome\_Tile|1  
GATTTATATGATATATATGCAGATGAGAATCTGTTAAATAATGATATTAGTTTTACTGAC  
>HPV43\_Alpha\_40804474\_nt5461\_Genome\_Tile|1  
AGATGAGAATCTGTTAAATAATGATATTAGTTTTACTGACACACACGTGTCCCTACAGAA  
>HPV43\_Alpha\_40804474\_nt5481\_Genome\_Tile|1  
ATGATATTAGTTTTACTGACACACACGTGTCCCTACAGAATTCTACTAAGGTTGTTAATA  
>HPV43\_Alpha\_40804474\_nt5521\_Genome\_Tile|1  
TTCTACTAAGGTTGTTAATACAGCTGTGCCACTTGCAACTGTACCTGATATTTATGCACA  
>HPV43\_Alpha\_40804474\_nt5541\_Genome\_Tile|1  
CAGCTGTGCCACTTGCAACTGTACCTGATATTTATGCACAAACGGGGCCTGACATAAGCT  
>HPV43\_Alpha\_40804474\_nt5561\_Genome\_Tile|1  
GTACCTGATATTTATGCACAAACGGGGCCTGACATAAGCTTTCCTACTATTCCTATTCAC  
>HPV43\_Alpha\_40804474\_nt5601\_Genome\_Tile|1  
TTCCTACTATTCCTATTCACATTCCATATATTCCTGTGTCCCCATCTATTTCCCCTCAGT  
>HPV43\_Alpha\_40804474\_nt5621\_Genome\_Tile|1  
ATTCCATATATTCCTGTGTCCCCATCTATTTCCCCTCAGTCTGTTCCATACATGGCACT  
>HPV43\_Alpha\_40804474\_nt5641\_Genome\_Tile|1  
CCCATCTATTTCCCCTCAGTCTGTTTCCATACATGGCACTGATTTTTATTGTCATCCTTC  
>HPV43\_Alpha\_40804474\_nt5881\_Genome\_Tile|1  
TTGCAGTGGGTCACCCATATTTCCCCCTAAAAATTCCTCTGGTAAAATAACTGTACCTA  
>HPV43\_Alpha\_40804474\_nt6561\_Genome\_Tile|1  
GTGCCTTCCGATATGTATATTGCTGGCTCTAATACCAGGTCCAAAATTGCAGATAGTATA  
>HPV43\_Alpha\_40804474\_nt6581\_Genome\_Tile|1  
TGCTGGCTCTAATACCAGGTCCAAAATTGCAGATAGTATATATTTTTCTACACCCAGTGG  
>HPV43\_Alpha\_40804474\_nt7201\_Genome\_Tile|1  
TAAAGCGTTCTGCACCATCCTCCTCTACGTCTGCCCCTGCCTCTAAACGCAAAAAAACTA  
>HPV43\_Alpha\_40804474\_nt7341\_Genome\_Tile|1  
GTACTTGTGTGTATGTGTGTATATGTGTGTATGTATTGTTGCAATGACAAATAGAAA  
>HPV43\_Alpha\_40804474\_nt7521\_Genome\_Tile|1  
TCCTGTGTTTTGAGTTTACTATTTGTAAGTGGCTTTGGTTTTAGTAATGGTTACTGTTG  
>HPV43\_Alpha\_40804474\_nt7541\_Genome\_Tile|1  
TATTTGTAAGTGGCTTTGGTTTTAGTAATGGTTACTGTTGTGGGTATGTAAAATGGCGTC  
>HPV43\_Alpha\_40804474\_nt7561\_Genome\_Tile|1  
TTTAGTAATGGTTACTGTTGTGGGTATGTAAAATGGCGTCTGAACGTCTTCCATTTTGTT  
>HPV43\_Alpha\_40804474\_nt7661\_Genome\_Tile|1  
GGTGTACGATAATTTGCAAAGGTTACTGTGCCCTGCCAAAATATGTTGGCACACTTTT  
>HPV43\_Alpha\_40804474\_nt7761\_Genome\_Tile|1  
TCCACTTTTACTATACAAATGTACCTTTTCACCTCTATGTTTTATTACCTTTTTATTCTT  
>HPV43\_Alpha\_40804474\_nt7781\_Genome\_Tile|1  
GTACCTTTTCACCTCTATGTTTTATTACCTTTTTATTCTTTTTGACATATATATTTGTTT  
>HPV43\_Alpha\_40804474\_nt7801\_Genome\_Tile|1

TTTATTACCTTTTTATTCTTTTTGACATATATATTTGTTTTTCATAGTTACTAATAGCTT  
>HPV43\_Alpha\_40804474\_nt7821\_Genome\_Tile|1  
TTTGACATATATATTTGTTTTTCATAGTTACTAATAGCTTTTTTGGCTCACATAAATGAA  
>HPV43\_Alpha\_40804474\_nt7841\_Genome\_Tile|1  
TTCATAGTTACTAATAGCTTTTTTGGCTCACATAAATGAACTGCAGTCATAAAATATGTA  
>HPV43\_Alpha\_40804474\_nt7861\_Genome\_Tile|1  
TTTTTGGCTCACATAAATGAACTGCAGTCATAAAATATGTATGAGTAAGTGTGTGGTAAG  
>HPVcand87\_Alpha\_14475578\_nt0081\_Genome\_Tile|1  
CGGTGTATGTGCAACGGGACAGTCATGCCCCAACGGACGCTACACACCTACCAATATCTTT  
>HPVcand87\_Alpha\_14475578\_nt0101\_Genome\_Tile|1  
AGTCATGCCCCAACGGACGCTACACACCTACCAATATCTTTTTGCTATGTCAGGAATATGA  
>HPVcand87\_Alpha\_14475578\_nt1661\_Genome\_Tile|1  
TGCAACAAAAGTAGGGAAACAGTGGCACACTGTATAGGCACTATATTAAATATTCCAGAG  
>HPVcand87\_Alpha\_14475578\_nt2521\_Genome\_Tile|1  
TATAGAGGCAGATGACAGTTTAAAGTATTACGGAGCAGAATGGTGGTGTTCGGTTTCT  
>HPVcand87\_Alpha\_14475578\_nt3521\_Genome\_Tile|1  
CTACACACGGACAAACAATAACCCTAACAACACACAGTGGACACGGGACAACCTGTATCAG  
>HPVcand87\_Alpha\_14475578\_nt3801\_Genome\_Tile|1  
ATTGTGGCTACACAGGGACATATGTCTATGTGTGTATAAAGCATTGTGCATAACTGTGA  
>HPVcand87\_Alpha\_14475578\_nt3841\_Genome\_Tile|1  
GCATTGTGCATAAATACTGTATACATTGGGTGTACCTGTATGTAACCTAGCTGTATAATACA  
>HPVcand87\_Alpha\_14475578\_nt3861\_Genome\_Tile|1  
TACATTGGTGTACCTGTATGTAACCTAGCTGTATAATACATTTTGCATACCTGACATATA  
>HPVcand87\_Alpha\_14475578\_nt3881\_Genome\_Tile|1  
TAACCTAGCTGTATAATACATTTTGCATACCTGACATATACAGCACAACCCTGGACCTTA  
>HPVcand87\_Alpha\_14475578\_nt4061\_Genome\_Tile|1  
GGTTTTTGTATATGCAGGTACTGTGGTACATTGAAGTGTATAAGTAAATCACACAACCA  
>HPVcand87\_Alpha\_14475578\_nt4201\_Genome\_Tile|1  
GGTGGATATGATATAGTATTGTTTGAGCGTGGAGATGTTGGTATATTGGCATTAAATTTTG  
>HPVcand87\_Alpha\_14475578\_nt4221\_Genome\_Tile|1  
GTTTGAGCGTGGAGATGTTGGTATATTGGCATTAAATTTTGTACTGATTGCTATTATCTT  
>HPVcand87\_Alpha\_14475578\_nt4241\_Genome\_Tile|1  
GTATATTGGCATTAAATTTGTTACTGATTGCTATTATCTTAATTTTGTATACATACGCA  
>HPVcand87\_Alpha\_14475578\_nt4321\_Genome\_Tile|1  
GTATTGTAATTTTGTATTGTTTGTAAATAAACTGGTACCATGCCAAAATCCCGTCGCAAAC  
>HPVcand87\_Alpha\_14475578\_nt4481\_Genome\_Tile|1  
TCTTAAGTGGGCCAGCCTGGGTGTCTTCTTCGGTGGCCTTGGCATTGGCACCTCATCGGG  
>HPVcand87\_Alpha\_14475578\_nt5421\_Genome\_Tile|1  
GCTGATGATACCCATTTGTCCTCTGTGTTACGGGGGCCCTCTCTTCCATCATTCACAGC  
>HPVcand87\_Alpha\_14475578\_nt5441\_Genome\_Tile|1  
CTCTGTGTTACGGGGGCCCTCTCTTCCATCATTCACAGCTCTACCCCTACAGCATCTAC  
>HPVcand87\_Alpha\_14475578\_nt5461\_Genome\_Tile|1  
CTCTTCCATCATTCACAGCTCTACCCCTACAGCATCTACAAAGGTGTCGGCCACGTCCA  
>HPVcand87\_Alpha\_14475578\_nt5481\_Genome\_Tile|1  
TCTACCCCTACAGCATCTACAAAGGTGTCGGCCACGTCCATACTATCCTCTTCCCATTAT  
>HPVcand87\_Alpha\_14475578\_nt5541\_Genome\_Tile|1  
GACAATGTAACAGTCCCCTTGTCTGCAACAGATGTGCCCTATATACAGGTCCCGATATT  
>HPVcand87\_Alpha\_14475578\_nt5881\_Genome\_Tile|1  
CTTACTGTGGGTCACCCCTTACTATCCAGTACTGTTACCACCCCTGGTCAGAACAAGAAA  
>HPVcand87\_Alpha\_14475578\_nt5901\_Genome\_Tile|1  
CTATCCAGTTACTGTTACCACCCCTGGTCAGAACAAGAAATCCAATATTCCAAAGGTGTC  
>HPVcand87\_Alpha\_14475578\_nt6281\_Genome\_Tile|1  
TTTGTGCCAATGTACAGCCCAAGACAGGGGATGTGCCACCATTGCAATTTACTAATTCTA  
>HPVcand87\_Alpha\_14475578\_nt6581\_Genome\_Tile|1  
CCTATTTTTTGAAGGGGGCGTCGTCTGGCCCTAGGGCCTCTTTAAGCAGTTATGTGTATG



>HPVcand87\_Alpha\_14475578\_nt7261\_Genome\_Tile|1  
AAAAAGTAGTGTGGTGTGTGCTATATTGTATGTCTGTTTGGTATGTACTTTTTATGTT  
>HPVcand87\_Alpha\_14475578\_nt7281\_Genome\_Tile|1  
TGCTATATTGTATGTCTGTTTGGTATGTACTTTTTATGTTTTGTATGTATTGTGTTTGT  
>HPVcand87\_Alpha\_14475578\_nt7301\_Genome\_Tile|1  
TGGTATGTACTTTTTATGTTTTGTATGTATTGTGTTTGTGTTTGTATATGCTTTGTATGTAT  
>HPVcand62\_Alpha\_39932599\_nt0721\_Genome\_Tile|1  
GGCCGATGCGGAAGGTACCAATGGCGGGGATGGGATAGATGGTACAAACGGGGCCGGAGG  
>HPVcand62\_Alpha\_39932599\_nt1001\_Genome\_Tile|1  
AGTCCTGCAACAAGCTCATGTGTATCCTGGGTGGACTGTGAATTGAGCCCGCGGTTGAAC  
>HPVcand62\_Alpha\_39932599\_nt1261\_Genome\_Tile|1  
AGATGTGCAACAATCGCAGGAACGCACAGCAAGTATTGTAGAGCTGTTAAAAACCAGTAA  
>HPVcand62\_Alpha\_39932599\_nt1821\_Genome\_Tile|1  
TAGTGACGAAAGTGACCTAGCATATCAATACGCATTGCTGGGCAATGACGACCCCAATG  
>HPVcand62\_Alpha\_39932599\_nt2061\_Genome\_Tile|1  
AAAAAATAGAAATTTGTGACATTTATGAGTGCCTAAAAATGTTTTTAAGAAATATACCCA  
>HPVcand62\_Alpha\_39932599\_nt2081\_Genome\_Tile|1  
TTTATGAGTGCCTAAAAATGTTTTTAAGAAATATACCCAAAAAAGCTGTATAGTAATA  
>HPVcand62\_Alpha\_39932599\_nt2361\_Genome\_Tile|1  
GAAACATAAAAAACCTGACACAGATACAATGTCCTCCCTTATTTATTACCACCAATATAA  
>HPVcand62\_Alpha\_39932599\_nt2401\_Genome\_Tile|1  
ATTTATTACCACCAATATAAATCCTTTGGAAGACGCAAATCTAAAAATACCTGCATAGTAG  
>HPVcand62\_Alpha\_39932599\_nt2421\_Genome\_Tile|1  
ATCCTTTGGAAGACGCAAATCTAAAAATACCTGCATAGTAGAATTGCAGTATTCCTACTTTA  
>HPVcand62\_Alpha\_39932599\_nt3021\_Genome\_Tile|1  
GGGTACATATATGTGCAAACAGATACCGAGCAATGGTGTAAAGTACAAGGAAAGGTAAGC  
>HPVcand62\_Alpha\_39932599\_nt3041\_Genome\_Tile|1  
AGATACCGAGCAATGGTGTAAAGTACAAGGAAAGGTAAGCTATGAAGGGCTATACTACGA  
>HPVcand62\_Alpha\_39932599\_nt3241\_Genome\_Tile|1  
TGCGAGAGATACCCCTGCTGAAACTACTAGACTGCTACACACCCCGAACCCACCACCA  
>HPVcand62\_Alpha\_39932599\_nt3661\_Genome\_Tile|1  
GGTATGCCAATATAGAACAACGCACAGAATTCCTGCAACGTGTAACAATACCAAAAGGCA  
>HPVcand62\_Alpha\_39932599\_nt3681\_Genome\_Tile|1  
CGCACAGAATTCCTGCAACGTGTAACAATACCAAAAGGCATACAAGCAATGCAAGGGTAT  
>HPVcand62\_Alpha\_39932599\_nt3761\_Genome\_Tile|1  
ATATATATATGTACATATATATTACTGTAATCACATATAGCTACGTGTGTAAACAATATT  
>HPVcand62\_Alpha\_39932599\_nt3781\_Genome\_Tile|1  
ATTACTGTAATCACATATAGCTACGTGTGTAAACAATATTGTTTGTGCTGTATCTGAGCC  
>HPVcand62\_Alpha\_39932599\_nt4081\_Genome\_Tile|1  
CACTGCTGCTATTGTGTATATACATAGTAGGTGTATTTGCAGGTGTTTAGTAGGTATGCA  
>HPVcand62\_Alpha\_39932599\_nt4101\_Genome\_Tile|1  
TACATAGTAGGTGTATTTGCAGGTGTTTAGTAGGTATGCATCCTGTTATGGTACGCTCCT  
>HPVcand62\_Alpha\_39932599\_nt4201\_Genome\_Tile|1  
CAGTGGTCTACTGTTTTTATTGTGCCTCATAGTGGCATTAAATACTGTTTGCTATATACAA  
>HPVcand62\_Alpha\_39932599\_nt4221\_Genome\_Tile|1  
TGTGCCTCATAGTGGCATTAAATACTGTTTGCTATATACAAGTTGTTGCAATTGTAACCTAC  
>HPVcand62\_Alpha\_39932599\_nt4241\_Genome\_Tile|1  
ATACTGTTTGCTATATACAAGTTGTTGCAATTGTAACCTACCAGCGTTGTACATACCATAT  
>HPVcand62\_Alpha\_39932599\_nt4261\_Genome\_Tile|1  
GTTGTTGCAATTGTAACCTACCAGCGTTGTACATACCATATTTCTGTTATTGTTGCTTTAT  
>HPVcand62\_Alpha\_39932599\_nt4801\_Genome\_Tile|1  
TCCCTTACCGGTACCACTGTACAGGTTAGCAGTACCAACTTTTTAAATCCTGCATATACT  
>HPVcand62\_Alpha\_39932599\_nt4861\_Genome\_Tile|1  
GAGCCATCCATTATAGACCTCCCCAACTGGTGAGCTTTCGGGTCATGTGCTTACCAGT  
>HPVcand62\_Alpha\_39932599\_nt5461\_Genome\_Tile|1

CTTGATGCTGTATTACAGTCTGTGCCTTCTATGTCTTCCAGGCCCTTGGTCCCAGCAAT  
>HPVcand62\_Alpha\_39932599\_nt5501\_Genome\_Tile|1  
GGCCCTTGGTCCCAGCAATGCCACCATATCTGCCACGTCTGTGGCATCCTCTCATACTA  
>HPVcand62\_Alpha\_39932599\_nt5601\_Genome\_Tile|1  
GTCCACTGGCCCTGATGTGGAATTGCCTCAGTTTTCTGTACCTGTGTCTGTGCTAACGCC  
>HPVcand62\_Alpha\_39932599\_nt5621\_Genome\_Tile|1  
AATTGCCTCAGTTTTCTGTACCTGTGTCTGTGCTAACGCCTTCCTTCCCTGCAACTACCC  
>HPVcand62\_Alpha\_39932599\_nt5641\_Genome\_Tile|1  
CCTGTGTCTGTGCTAACGCCTTCCTTCCCTGCAACTACCCCATATTCTATATATATTGTA  
>HPVcand62\_Alpha\_39932599\_nt5681\_Genome\_Tile|1  
CATATTCTATATATATTGTAGGTTCTGATTATTATTTGTTCCCTTCCTATATTTTTTTCC  
>HPVcand62\_Alpha\_39932599\_nt6241\_Genome\_Tile|1  
GTTAATTGTGGGGTGTAAGCCCCCTATAGGAGAGCACTGGACCAAAGGTACCTTATGCCC  
>HPVcand62\_Alpha\_39932599\_nt7321\_Genome\_Tile|1  
ACTGTGTGTGCGCGTTTGTCTAGTGTGTTTGTATATGTATGTATGGCCTGTTTGTATA  
>HPVcand62\_Alpha\_39932599\_nt7341\_Genome\_Tile|1  
CAGTGTGTTTGTATATGTATGTATGGCCTGTTTGTATATGTTGTGTATGTACCCCCCT  
>HPVcand62\_Alpha\_39932599\_nt7561\_Genome\_Tile|1  
TACATTAGTGCCTCCATTTTGTGTGCTACATTTTGTATGACCCCATTTGTGTTACCCCGAC  
>HPVcand62\_Alpha\_39932599\_nt7741\_Genome\_Tile|1  
GGGCGTGCCTGACATATTCTTGGCGGCCCTACAACCTGTTTTGCACACAAATTATACAGTGC  
>HPVcand62\_Alpha\_39932599\_nt7901\_Genome\_Tile|1  
ACTATGTGTCCCTATAAACTAAGCATGCTTTGTGCAAACCTGTTTTAACATACAAGGTGGG  
>HPVcand62\_Alpha\_39932599\_nt7921\_Genome\_Tile|1  
AGCATGCTTTGTGCAAACCTGTTTTAACATACAAGGTGGGGCAATGTGTAAGTCTACTTT  
>HPVcand62\_Alpha\_39932599\_nt7961\_Genome\_Tile|1  
GCAATGTGTAAGTCTACTTTTCCCTTATAATAATTTACAACAATCATCTGTATAATAAAG  
>HPVcand85\_Alpha\_4574720\_nt0081\_Genome\_Tile|1  
CCAGCTTACAGTACATGTAATAGGATGGCTGAATTTGGCAATCCAGCTACCCGACCCTAC  
>HPVcand85\_Alpha\_4574720\_nt0121\_Genome\_Tile|1  
ATCCAGCTACCCGACCCTACAACTACCAGACCTATGCAACACACTGGACACATCACTGC  
>HPVcand85\_Alpha\_4574720\_nt0341\_Genome\_Tile|1  
ATATTATAGCGACTCTGTGTATGGGGAAACGTTAGAAAACTAACAAATAGCAATATATA  
>HPVcand85\_Alpha\_4574720\_nt0401\_Genome\_Tile|1  
TGATATATTAATAAGGTGTTTACGGTGTCAAAAACCTTTATGTCCGGCAGAAAACTAAA  
>HPVcand85\_Alpha\_4574720\_nt0501\_Genome\_Tile|1  
AAATATAGAGGACAGTGTGCGCCGGTGCATGACGCGTGCACAAGAACAGCAAGGCAGCCGC  
>HPVcand85\_Alpha\_4574720\_nt0621\_Genome\_Tile|1  
TGTTAGATTTGGAACCATATAATGAAGTGCAAGAGGTTGACCTGTATTGCTATGAGGAAT  
>HPVcand85\_Alpha\_4574720\_nt0661\_Genome\_Tile|1  
CCTGTATTGCTATGAGGAATTAAACAACCTCAGAGGAAGAAATAGATGAACCAGATAATGC  
>HPVcand85\_Alpha\_4574720\_nt0681\_Genome\_Tile|1  
TAAACAACCTCAGAGGAAGAAATAGATGAACCAGATAATGCAATTAATCACCGACAACCAC  
>HPVcand85\_Alpha\_4574720\_nt1181\_Genome\_Tile|1  
AAGTATGGAGCACACAGCACAGAAAACAGTCCATGTCGTGATACAGCAAGTATACATAGC  
>HPVcand85\_Alpha\_4574720\_nt1261\_Genome\_Tile|1  
AGAAATATCGTTAAATAGCTATAATAATACAGCTAAACGAAGGCTGTGTTCAAGTCCAGCA  
>HPVcand85\_Alpha\_4574720\_nt1381\_Genome\_Tile|1  
TGTGTTTGGGGATGGGAAAAATGGCGACGGTTTAAATAGTGAGGCATGTAGTACAGATAA  
>HPVcand85\_Alpha\_4574720\_nt1461\_Genome\_Tile|1  
AAAATCCAAACTCACCAATGACACAAATTGTGTCTTATTAAAAAGTAAATAATAAAAAAG  
>HPVcand85\_Alpha\_4574720\_nt1481\_Genome\_Tile|1  
ACACAAATTGTGTCCTTATTAAAAAGTAAATAATAAAAAAGCAGCAATATTGGCTAAATTT  
>HPVcand85\_Alpha\_4574720\_nt2441\_Genome\_Tile|1  
CCGTAAACAGACACTAAGATAGCTATGGTAGATGATGCAACACCAACATGCTGGTCCTAT

>HPVcand85\_Alpha\_4574720\_nt2761\_Genome\_Tile|1  
CAGATTAGATTTGCACCAGGAAGAGGAGGATACAGAAAATGATGGATGCCCTATCCCAAC  
>HPVcand85\_Alpha\_4574720\_nt2861\_Genome\_Tile|1  
GACTGATAGTACAGACATATGTGATCAAATAGACTATTGGAAGTGTGTACGTCTGGAAAA  
>HPVcand85\_Alpha\_4574720\_nt3041\_Genome\_Tile|1  
GAGTCTTGCTAAATCAGAGTTTTAAAAATGAAC TGTGGACATTGCAAGATACGTGCCAAGA  
>HPVcand85\_Alpha\_4574720\_nt3141\_Genome\_Tile|1  
GGACAAACCGTCGAAGTACGGTATGATGGAGACAAAGACAATACTATGCATTATACATCT  
>HPVcand85\_Alpha\_4574720\_nt3161\_Genome\_Tile|1  
GTATGATGGAGACAAAGACAATACTATGCATTATACATCTTGGGACTATATATATTATGT  
>HPVcand85\_Alpha\_4574720\_nt3181\_Genome\_Tile|1  
ATACTATGCATTATACATCTTGGGACTATATATATTATGTAACAGAAGGTGATAAGTGGT  
>HPVcand85\_Alpha\_4574720\_nt3241\_Genome\_Tile|1  
GTAAAACCAAAGTTATGTGAATTATTGTGGATTGTATTATATAAAGGAGGGACAACAAA  
>HPVcand85\_Alpha\_4574720\_nt3261\_Genome\_Tile|1  
AATTATTGTGGATTGTATTATATAAAGGAGGGACAACAAACATATTATGTACAGTTTAAA  
>HPVcand85\_Alpha\_4574720\_nt3281\_Genome\_Tile|1  
TATAAAGGAGGGACAACAAACATATTATGTACAGTTTAAATGTGATGCACAACAATATGG  
>HPVcand85\_Alpha\_4574720\_nt3321\_Genome\_Tile|1  
TGTGATGCACAACAATATGGACAGAGCGGTAAATGGGAAGTGTGGTATAATGGTAAAAAA  
>HPVcand85\_Alpha\_4574720\_nt3341\_Genome\_Tile|1  
ACAGAGCGGTAAATGGGAAGTGTGGTATAATGGTAAAAAAATTGAATGTGTAAATACCTG  
>HPVcand85\_Alpha\_4574720\_nt3361\_Genome\_Tile|1  
TGTGGTATAATGGTAAAAAAATTGAATGTGTAAATACCTGTGACAAAAATAATACAATGTT  
>HPVcand85\_Alpha\_4574720\_nt3381\_Genome\_Tile|1  
ATTGAATGTGTAAATACCTGTGACAAAAATAATACAATGTTCTGAATCTATGTACAGTACC  
>HPVcand85\_Alpha\_4574720\_nt3401\_Genome\_Tile|1  
TGACAAAAATAATACAATGTTCTGAATCTATGTACAGTACCTGTGACGAGACAGTATCCGC  
>HPVcand85\_Alpha\_4574720\_nt3461\_Genome\_Tile|1  
TACTGCAATTGCTAGAGAATTACAACACCCACACACCGTATACCGAAGCCACCACCGT  
>HPVcand85\_Alpha\_4574720\_nt3501\_Genome\_Tile|1  
TATACCGAAGCCACCACCGTGTGCACCCAAAAGAGCGGGGGTTCGGCGCCGACTAGAAAC  
>HPVcand85\_Alpha\_4574720\_nt3561\_Genome\_Tile|1  
CCATTTCAGACATTGTGGATTTCACAGAAACAAGTGAAGTCGACGGACTGTCCGTGGACCAC  
>HPVcand85\_Alpha\_4574720\_nt3581\_Genome\_Tile|1  
CACAGAAACAAGTGAAGTCGACGGACTGTCCGTGGACCACCTCAACAACCCCTGCTTAG  
>HPVcand85\_Alpha\_4574720\_nt3701\_Genome\_Tile|1  
GCACCTAAAAGGTGATAAAAATAGATTAAAGTGTGCGATACAGGCTACAAAAGTTCCA  
>HPVcand85\_Alpha\_4574720\_nt3721\_Genome\_Tile|1  
ATAGATTAAAGTGTTTGCATACAGGCTACAAAAGTTCATAATTTATATACACAAATAT  
>HPVcand85\_Alpha\_4574720\_nt3741\_Genome\_Tile|1  
TACAGGCTACAAAAGTTCATAATTTATATACACAAATATCATGTACGTGGCATTGGATA  
>HPVcand85\_Alpha\_4574720\_nt3761\_Genome\_Tile|1  
TAATTTATATACACAAATATCATGTACGTGGCATTGGATAGGTGGTAAAGAAACAACAAG  
>HPVcand85\_Alpha\_4574720\_nt3781\_Genome\_Tile|1  
CATGTACGTGGCATTGGATAGGTGGTAAAGAAACAACAAGGACTGGTATATTAACATTGG  
>HPVcand85\_Alpha\_4574720\_nt3821\_Genome\_Tile|1  
GACTGGTATATTAACATTGGCATATGCAAATGAAACCCAAAGACAAAAATTTTGGATGT  
>HPVcand85\_Alpha\_4574720\_nt3861\_Genome\_Tile|1  
AGACAAAAATTTTGGATGTTGTAAAAATACCTAATACTGTTAATGTATCCCTTGGTTAT  
>HPVcand85\_Alpha\_4574720\_nt3881\_Genome\_Tile|1  
TGTAAAAAATACCTAATACTGTTAATGTATCCCTTGGTTATATGACATTGTAATAGGGGTA  
>HPVcand85\_Alpha\_4574720\_nt3901\_Genome\_Tile|1  
TTAATGTATCCCTTGGTTATATGACATTGTAATAGGGGTATGTTAATTGCTGTATTTTTG  
>HPVcand85\_Alpha\_4574720\_nt4021\_Genome\_Tile|1

GTGTGTGCGCATGCTTGGCTACTTGTGTTTTTGTTAATAGTTTTTATTACTACCCCTTTT  
>HPVcand85\_Alpha\_4574720\_nt4041\_Genome\_Tile|1  
ACTTGTGTTTTTGTTAATAGTTTTTATTACTACCCCTTTTACTGCATTTATTGTATATAT  
>HPVcand85\_Alpha\_4574720\_nt4061\_Genome\_Tile|1  
TTTTTATTACTACCCCTTTTACTGCATTTATTGTATATATATTTTTTTTTTATATTGCCAA  
>HPVcand85\_Alpha\_4574720\_nt4081\_Genome\_Tile|1  
ACTGCATTTATTGTATATATATTTTTTTTTTATATTGCCAATGTTTTTATTGCATTTGCAC  
>HPVcand85\_Alpha\_4574720\_nt4101\_Genome\_Tile|1  
ATTTTTTTTTTATATTGCCAATGTTTTTATTGCATTTGCACAGTGTACATACATTTGACTA  
>HPVcand85\_Alpha\_4574720\_nt4121\_Genome\_Tile|1  
TGTTTTTATTGCATTTGCACAGTGTACATACATTTGACTAAGTACTATATAACCTGTATT  
>HPVcand85\_Alpha\_4574720\_nt4141\_Genome\_Tile|1  
AGTGTACATACATTTGACTAAGTACTATATAACCTGTATTGTACAGGACATTACATTGGT  
>HPVcand85\_Alpha\_4574720\_nt4161\_Genome\_Tile|1  
AGTACTATATAACCTGTATTGTACAGGACATTACATTGGTAGTGTAATACCTTTTTGTAA  
>HPVcand85\_Alpha\_4574720\_nt4181\_Genome\_Tile|1  
GTACAGGACATTACATTGGTAGTGTAATACCTTTTTGTAATAAACATTGGTATCCCATCGT  
>HPVcand85\_Alpha\_4574720\_nt4541\_Genome\_Tile|1  
TTAGTTGAAGAGTCCAGTATTGTTACATCTGGAGCTCCTGTTCCCTACATTTACAGGCACA  
>HPVcand85\_Alpha\_4574720\_nt4761\_Genome\_Tile|1  
ATATTTTTTATTACTACCCCTACATCTGGGACACATGGATACGAGGAAATCCAATGCACA  
>HPVcand85\_Alpha\_4574720\_nt4881\_Genome\_Tile|1  
GGCGTGTGGCAGGACCTAGATTATATAGTCAAGCGTATCAACAAGTTAAAAATACTAATT  
>HPVcand85\_Alpha\_4574720\_nt4921\_Genome\_Tile|1  
ACAAGTTAAAAATACTAATTCAGACTTTATATCCCGTCCATCTACGTTGGTTACATTTAC  
>HPVcand85\_Alpha\_4574720\_nt4941\_Genome\_Tile|1  
CAGACTTTATATCCCGTCCATCTACGTTGGTTACATTTACCAATCCTGCATATGAGCCTA  
>HPVcand85\_Alpha\_4574720\_nt4981\_Genome\_Tile|1  
CAATCCTGCATATGAGCCTATAGACACTACATTAACCTTTTCACCACAGGATGTTGTGCC  
>HPVcand85\_Alpha\_4574720\_nt5281\_Genome\_Tile|1  
TGACATTTATGCTGACACTGATATTGATAATAATGCCATGCTATATGATAGAAATATTTT  
>HPVcand85\_Alpha\_4574720\_nt5301\_Genome\_Tile|1  
ATATTGATAATAATGCCATGCTATATGATAGAAATATTTCTGATGTTACACAACCTACCA  
>HPVcand85\_Alpha\_4574720\_nt5321\_Genome\_Tile|1  
CTATATGATAGAAATATTTCTGATGTTACACAACCTACCACTTCAACTATATCTAGTGTA  
>HPVcand85\_Alpha\_4574720\_nt5341\_Genome\_Tile|1  
TGATGTTACACAACCTACCACTTCAACTATATCTAGTGTATCCTCTCGTTATAGTAATAC  
>HPVcand85\_Alpha\_4574720\_nt5361\_Genome\_Tile|1  
CTTCAACTATATCTAGTGTATCCTCTCGTTATAGTAATACTACTATTCCCTTAGCAACAT  
>HPVcand85\_Alpha\_4574720\_nt5381\_Genome\_Tile|1  
TCCTCTCGTTATAGTAATACTACTATTCCCTTAGCAACATCTTGGGATGTTCCCTGTTTAT  
>HPVcand85\_Alpha\_4574720\_nt5421\_Genome\_Tile|1  
CTTGGGATGTTCCCTGTTTCATACAGGGCCTGACATGACATTACCTACTACTATACCCAGT  
>HPVcand85\_Alpha\_4574720\_nt5441\_Genome\_Tile|1  
ACAGGGCCTGACATGACATTACCTACTACTATACCCAGTGGCCTAATATAGTACCTTTA  
>HPVcand85\_Alpha\_4574720\_nt5461\_Genome\_Tile|1  
ACCTACTACTATACCCAGTGGCCTAATATAGTACCTTTACTGCCTAATAATACACATTC  
>HPVcand85\_Alpha\_4574720\_nt5481\_Genome\_Tile|1  
GGCCTAATATAGTACCTTTACTGCCTAATAATACACATTTCAGTTGTACTTCAGGGAACAA  
>HPVcand85\_Alpha\_4574720\_nt5501\_Genome\_Tile|1  
CTGCCTAATAATACACATTTCAGTTGTACTTCAGGGAACAACTATTATTTATGGCCTAAT  
>HPVcand85\_Alpha\_4574720\_nt5521\_Genome\_Tile|1  
AGTTGTACTTCAGGGAACAACTATTATTTATGGCCTAATTATTATTTATTTTCAAAAA  
>HPVcand85\_Alpha\_4574720\_nt5681\_Genome\_Tile|1  
AGACGATTATGTAACACGTACCAGTACATTTTATCATGCTGGCAGCTCTAGGCTTCTAAC

>HPVcand85\_Alpha\_4574720\_nt5721\_Genome\_Tile|1  
GGCAGCTCTAGGCTTCTAACCGTTGGACATCCATACTATAAAGTTACCTCAAATGGAGGC  
>HPVcand85\_Alpha\_4574720\_nt5981\_Genome\_Tile|1  
CAAATTGGATGACACAGAAAATTCCCATGTTGCTACTTCTGTAGTTACACACGACACTAG  
>HPVcand85\_Alpha\_4574720\_nt6001\_Genome\_Tile|1  
ATTCCCATGTTGCTACTTCTGTAGTTACACACGACACTAGAGATAATGTGTCAGTGGATT  
>HPVcand85\_Alpha\_4574720\_nt6121\_Genome\_Tile|1  
AGGGTACTGCCTGTAAGCCCCGGTGCTGTGCAAACAGGTGACTGTCTCTCCATTAGAACTAG  
>HPVcand85\_Alpha\_4574720\_nt6381\_Genome\_Tile|1  
CGCCATTTTTTGAACAGGGGAGGCACTATAGGAGATGCAGTACCGGAAACATTATATATA  
>HPVcand85\_Alpha\_4574720\_nt6401\_Genome\_Tile|1  
AGGCACTATAGGAGATGCAGTACCGGAAACATTATATATAAAAGGTACTAATGATAGGGC  
>HPVcand85\_Alpha\_4574720\_nt6421\_Genome\_Tile|1  
TACCGGAAACATTATATATAAAAGGTACTAATGATAGGGCAACACCTGGAAGCTGTATTT  
>HPVcand85\_Alpha\_4574720\_nt6441\_Genome\_Tile|1  
AAAGGTACTAATGATAGGGCAACACCTGGAAGCTGTATTTATTCTCCATCACCTAGTGGG  
>HPVcand85\_Alpha\_4574720\_nt6621\_Genome\_Tile|1  
CGTAGTACCAATCTTACCTTATCTACTGCAACTACTAATCCAGTTCCATCTATATATGAA  
>HPVcand85\_Alpha\_4574720\_nt6741\_Genome\_Tile|1  
CAATTGTGTAAAAATTACACTTACTACTGATTATGTCTTATATACATAACATGGATCCT  
>HPVcand85\_Alpha\_4574720\_nt6761\_Genome\_Tile|1  
TACTACTGATGTTATGTCTTATATACATAACATGGATCCTACTATTTTAGATAGTTGGAA  
>HPVcand85\_Alpha\_4574720\_nt7061\_Genome\_Tile|1  
GAAACGTGTTGCTTCTACTTCTACTGCTACTAGGCCCTCCAAACGGAACGTACTGCTAA  
>HPVcand85\_Alpha\_4574720\_nt7081\_Genome\_Tile|1  
CTACTGCTACTAGGCCCTCCAAACGGAACGTACTGCTAAATAATGTGTTGTGTATAATT  
>HPVcand85\_Alpha\_4574720\_nt7101\_Genome\_Tile|1  
AAACGGAACGTACTGCTAAATAATGTGTTGTGTATAATTGTGTTGTTTGTTTGTATATA  
>HPVcand85\_Alpha\_4574720\_nt7121\_Genome\_Tile|1  
ATAATGTGTTGTGTATAATTGTGTTGTGTTTGTGTTATATGTGTGTTTCCTTATATGTTG  
>HPVcand85\_Alpha\_4574720\_nt7301\_Genome\_Tile|1  
ACTGTCCCTTTATTATCCCTTGTATCCTGTGTATCCTGTGTGCCCTTTGTTTCCTACTTTA  
>HPVcand85\_Alpha\_4574720\_nt7321\_Genome\_Tile|1  
TGTATCCTGTGTATCCTGTGTGCCCTTTGTTTCCTACTTTATATAGGGTGTGTTATATGTT  
>HPVcand85\_Alpha\_4574720\_nt7381\_Genome\_Tile|1  
ATACATTATTTATAATACACTTTGTAGCGTCCATTTTATCCATTTGTATCCTACAAGCCT  
>HPVcand85\_Alpha\_4574720\_nt7461\_Genome\_Tile|1  
TATCGGTTGCCCTTTGACACACCTAACATTATACATTCTTATTGTTACATTATTTAAAGTT  
>HPVcand85\_Alpha\_4574720\_nt7661\_Genome\_Tile|1  
TATTTTCACTGTTTTTACTTGCTTTAATTACACTATTGGCCTGTACAACTACTTTTAGAT  
>HPVcand85\_Alpha\_4574720\_nt7701\_Genome\_Tile|1  
CTGTACAACTACTTTTAGATTCAAGAATGTGTCTTGTAGGTTATATACCTGTCACTGATT  
>HPV74\_Alpha\_27462483\_nt0101\_Genome\_Tile|1  
GCAGGAAAACCTTGTCTTGTCCAGAGGTATATTCCTTTGCCTATAAAAAATTTGTATATAG  
>HPV74\_Alpha\_27462483\_nt0121\_Genome\_Tile|1  
CCAGAGGTATATTCCTTTGCCTATAAAAAATTTGTATATAGTATACCGAGGAACTTTCCA  
>HPV74\_Alpha\_27462483\_nt3321\_Genome\_Tile|1  
GACGTTCCACCAACACCAACACCAACCAACCAACACCAAGCACCAGTGTGTA  
>HPV74\_Alpha\_27462483\_nt3581\_Genome\_Tile|1  
CATGGACCACTCCCACTATACCCACAAACATGCACTAGTAACACTAACATATGCTAAT  
>HPV74\_Alpha\_27462483\_nt3621\_Genome\_Tile|1  
TAACACTAACATATGCTAATGAACAACAGCGACAACAGTTTTTAGATACTGTAAGACTAC  
>HPV74\_Alpha\_27462483\_nt3641\_Genome\_Tile|1  
GAACAACAGCGACAACAGTTTTTAGATACTGTAAGACTACCTACAACAATTAGTTATAAG  
>HPV74\_Alpha\_27462483\_nt3661\_Genome\_Tile|1

TTTAGATACTGTAAGACTACCTACAACAATTAGTTATAAGTTGGGATATATGTCATTACA  
>HPV74\_Alpha\_27462483\_nt3681\_Genome\_Tile|1  
CTACAACAATTAGTTATAAGTTGGGATATATGTCATTACAATTGTTGTAATAGTGCATTG  
>HPV74\_Alpha\_27462483\_nt3701\_Genome\_Tile|1  
TTGGGATATATGTCATTACAATTGTTGTAATAGTGCATTGTAAATATTGTATGTATTGTA  
>HPV74\_Alpha\_27462483\_nt3721\_Genome\_Tile|1  
ATTGTTGTAATAGTGCATTGTAAATATTGTATGTATTGTACATGGACCTAATACCTATAG  
>HPV74\_Alpha\_27462483\_nt3861\_Genome\_Tile|1  
ATTATAGCAATAACTGATTTTTTTTGTATATACATCCATACTGGTACTAACACTCATTCTA  
>HPV74\_Alpha\_27462483\_nt3981\_Genome\_Tile|1  
GTGTGCTATCTACCTGCGTTTTCTTTGCATTTATATATTTTACATAATTTAGAGTAACTA  
>HPV74\_Alpha\_27462483\_nt4081\_Genome\_Tile|1  
GTTGTTATTATGGTTGTTAACTGCACTTATCGTAGCTATTCTTGCATTATTGTTAATGCA  
>HPV74\_Alpha\_27462483\_nt4101\_Genome\_Tile|1  
CTGCACTTATCGTAGCTATTCTTGCATTATTGTTAATGCATTTCAAGGGTGTAAACGCCTT  
>HPV74\_Alpha\_27462483\_nt4141\_Genome\_Tile|1  
TTTCAAGGGTGTAAACGCCTTCTGTATGCAGTAAATAAGTGTTTTTATACATGCTGTGTAT  
>HPV74\_Alpha\_27462483\_nt4681\_Genome\_Tile|1  
AGAAATCCCTCGTTTACTGACCCCTCTGTTATACAGTCTCAACCCCCGTAGAGGCTGGT  
>HPV74\_Alpha\_27462483\_nt4701\_Genome\_Tile|1  
CCCTTCTGTTATACAGTCTCAACCCCCGTAGAGGCTGGTGGTCATGTGCTGATTTCCCTC  
>HPV74\_Alpha\_27462483\_nt4761\_Genome\_Tile|1  
CTCTACTGTTTCTTCCCATCCAGTAGAGGAAATACCTTTAGATACATTTATTGTCTCCTC  
>HPV74\_Alpha\_27462483\_nt5001\_Genome\_Tile|1  
ATTTCAACACAATACAATACATAATCCTCCTGATGATGCCTTTATGGACATTATTGCCT  
>HPV74\_Alpha\_27462483\_nt5721\_Genome\_Tile|1  
TAGGAAATCCCTATTTCCCTATAAAACAGGTTAAACAAAACAGTTGTTCCCTAAAGTGTCTG  
>HPV74\_Alpha\_27462483\_nt6101\_Genome\_Tile|1  
CAATGTTCTAATGTTACTGTAAAGCCAGGCGATTGCCCTGCATTAGAATTAATTACTAGT  
>HPV74\_Alpha\_27462483\_nt6401\_Genome\_Tile|1  
GACCTATATATTAAGGGTACTACACGTGGTACACTTGCCAATGCTATTTACTTTAATACC  
>HPV74\_Alpha\_27462483\_nt6601\_Genome\_Tile|1  
CATGACAGTGTGTGCGCTACTACACAATCCCCTCCTGCTGCTACATATACTAGTACAGA  
>HPV74\_Alpha\_27462483\_nt6621\_Genome\_Tile|1  
CTACACAATCCCCTCCTGCTGCTACATATACTAGTACAGACTACAAACAATACATGAGAC  
>HPV74\_Alpha\_27462483\_nt6881\_Genome\_Tile|1  
CCTGATAAAGCAAAGCCTAATCCCTATGCCAATTTAAGTTTTTGGGAAGTAAATCTTAAG  
>HPV74\_Alpha\_27462483\_nt7021\_Genome\_Tile|1  
GGTTTCGTGTAGGTAAAAAGCGTTTCGGCCCCCTACAGCCCCCTCCTCAACCACTAAACAGAA  
>HPV74\_Alpha\_27462483\_nt7041\_Genome\_Tile|1  
GTTTCGGCCCCCTACAGCCCCCTCCTCAACCACTAAACAGAAACGCTCTAGGAAACGATAGC  
>HPV74\_Alpha\_27462483\_nt7061\_Genome\_Tile|1  
TCCTCAACCACTAAACAGAAACGCTCTAGGAAACGATAGCATGCTTTTGTTTTGTGTGTT  
>HPV74\_Alpha\_27462483\_nt7081\_Genome\_Tile|1  
ACGCTCTAGGAAACGATAGCATGCTTTTGTTTTGTGTGTTATATGTTGTTGCATGGTATA  
>HPV74\_Alpha\_27462483\_nt7101\_Genome\_Tile|1  
ATGCTTTTGTTTTGTGTGTTATATGTTGTTGCATGGTATATGTGTGTTGTATTATATTGT  
>HPV74\_Alpha\_27462483\_nt7141\_Genome\_Tile|1  
TGTGTGTTGTATTATATTGTGTGTCATATGTTGTTGTATGGTTTATGTTGTATGTACTTG  
>HPV74\_Alpha\_27462483\_nt7181\_Genome\_Tile|1  
GTTTATGTTGTATGTACTTGTGTGTCATATTGTATGTGTGTCATGTTGTGTAATGTTGTATG  
>HPV74\_Alpha\_27462483\_nt7241\_Genome\_Tile|1  
TACTGCCTGTATGTGTTTACTGTTGTATGTACTGCATGTATGTGTTTGTGTGTACAATA  
>HPV74\_Alpha\_27462483\_nt7261\_Genome\_Tile|1  
TGTTGTATGTACTGCATGTATGTGTTTGTGTGTGTACAATAAAGTTTATCTATCCCTGTGT

>HPV74\_Alpha\_27462483\_nt7281\_Genome\_Tile|1  
TGTGTTTGTGTGTACAATAAACTTTATCTATCCCTGTGTCCTGTTTTACCCTGTACGTG  
>HPV74\_Alpha\_27462483\_nt7301\_Genome\_Tile|1  
AACTTTATCTATCCCTGTGTCCTGTTTTACCCTGTACGTGTGTGTCTTGTCTTATAATTC  
>HPV74\_Alpha\_27462483\_nt7321\_Genome\_Tile|1  
CCTGTTTTACCCTGTACGTGTGTGTCTTGTCTTATAATTCTATATACCTAATTTACCTTT  
>HPV74\_Alpha\_27462483\_nt7441\_Genome\_Tile|1  
ATCCTGTAACCAATTTGTTGCAGCAAGCATTTTATGTAATCCTATATACTGTTTGCCAAG  
>HPV74\_Alpha\_27462483\_nt7581\_Genome\_Tile|1  
ATAACACTCCTGTCTGCCTGTTTAAACAATTGGGTACTTTGTTAATACATTTTTGTAGTTG  
>HPV74\_Alpha\_27462483\_nt7601\_Genome\_Tile|1  
TTTAACAATTTGGGTACTTTGTTAATACATTTTTGTAGTTGGTAGCCAACCTTTTAAAAGCA  
>HPV74\_Alpha\_27462483\_nt7741\_Genome\_Tile|1  
CCGGTATCGGTTAACACACGCCCTCTGCACTTCCTTATTATACATAATAACAATTTTACC  
>HPV69\_Alpha\_6970418\_nt0061\_Genome\_Tile|1  
GCATATAAAAAGTAAAAGACACAGCCATACACAAAACCAGCTATGTTTCAAGATCCCAGAG  
>HPV69\_Alpha\_6970418\_nt1021\_Genome\_Tile|1  
CTAATTGGATTTATAGATGATAGTAATATTAGTGATGGGGCAGAGCAACAGGTAGCGCAG  
>HPV69\_Alpha\_6970418\_nt1341\_Genome\_Tile|1  
TGTGTGTAGTCAGGGGGGGTCAAGTGGATCTGTATCAGACATGGAGGTGGACATAGGAGC  
>HPV69\_Alpha\_6970418\_nt1361\_Genome\_Tile|1  
CAAGTGGATCTGTATCAGACATGGAGGTGGACATAGGAGCACAGGCAAGTAGTGTAACCA  
>HPV69\_Alpha\_6970418\_nt1661\_Genome\_Tile|1  
TACTACCACTAATGCTAATACGATTTACATGTGCCAAAAATAGAGCAACAATTAAAAAAT  
>HPV69\_Alpha\_6970418\_nt2121\_Genome\_Tile|1  
ACAACATAGGTGTTCAAAAATAGAAGATGGAGGAACGTGGAAGGACATAGCAAGATTTCT  
>HPV69\_Alpha\_6970418\_nt2141\_Genome\_Tile|1  
TAGAAGATGGAGGAACGTGGAAGGACATAGCAAGATTTCTAAGATATCAAAATGTTAATT  
>HPV69\_Alpha\_6970418\_nt2541\_Genome\_Tile|1  
AAACATTAATCCACAAGACGACAATTCATTAATGTATTTACATAGTAGAGTAACAGTTAT  
>HPV69\_Alpha\_6970418\_nt2981\_Genome\_Tile|1  
AATTCAGAAATATGGAAGAGAAATGGACTATGAGAGACACGTGTTATGAATTGTATGTG  
>HPV69\_Alpha\_6970418\_nt3001\_Genome\_Tile|1  
GAAATGGACTATGAGAGACACGTGTTATGAATTGTATGTGACAGAGCCAAAACACTGTTT  
>HPV69\_Alpha\_6970418\_nt3141\_Genome\_Tile|1  
TGTATTATAAAACAGATATGGGATGGTGTAAAACAAATGGAGAAGTGGATTATAAGGGGA  
>HPV69\_Alpha\_6970418\_nt3181\_Genome\_Tile|1  
AGAAGTGGATTATAAGGGGATATACTATATGCATGGGTGTTGTAAACAGTACTATGTGGA  
>HPV69\_Alpha\_6970418\_nt3201\_Genome\_Tile|1  
TATACTATATGCATGGGTGTTGTAAACAGTACTATGTGGACTTTAAACAAGAGGCGTTAA  
>HPV69\_Alpha\_6970418\_nt3741\_Genome\_Tile|1  
CAATTACATTTGATAGTGAAACACAACGTGCTAGTTTTCTTACAACCTGTTAAGATACCAC  
>HPV69\_Alpha\_6970418\_nt3801\_Genome\_Tile|1  
AGAGTATAACATCAACATTGGGTATAATGTCATTGTAATCTATAGTGTAACATATATACA  
>HPV69\_Alpha\_6970418\_nt4041\_Genome\_Tile|1  
ACATCATTTACAGCTACGTTTTTTGTATATATTTGTTTGTATATACCTGCATTTTTG  
>HPV69\_Alpha\_6970418\_nt4081\_Genome\_Tile|1  
TTTATATACCTGCATTTTTGTACATTTTATGCTGTAATTTTACTACCTAATGGTTTAT  
>HPV69\_Alpha\_6970418\_nt4101\_Genome\_Tile|1  
TTACATTTTATGCTGTAATTTTACTACCTAATGGTTTATAAATAAACACTTCATAATGG  
>HPV69\_Alpha\_6970418\_nt4121\_Genome\_Tile|1  
TTTACTACCTAATGGTTTATAAATAAACACTTCATAATGGTGGCTGTTTCGTGCATCACGA  
>HPV69\_Alpha\_6970418\_nt4461\_Genome\_Tile|1  
CTTCCATAGTTACTTTTAGTAGAAGAATCAAGTATTATACAATCTGGATCTCCATTTCCCTA  
>HPV69\_Alpha\_6970418\_nt4561\_Genome\_Tile|1

TACTACAACCCCTGCTGTGTTAGATATTACCCCTCCCCTGGAAGTGTACACGTTACCAG  
>HPV69\_Alpha\_6970418\_nt4581\_Genome\_Tile|1  
TAGATATTACCCCTCCCCTGGAAGTGTACACGTTACCAGCACAAATATACAAAACCCAT  
>HPV69\_Alpha\_6970418\_nt4621\_Genome\_Tile|1  
CACAAATATACAAAACCCATTATATATTGAACCACCTGTAGATATTCCCTCAGTCTGGAGA  
>HPV69\_Alpha\_6970418\_nt4641\_Genome\_Tile|1  
TATATATTGAACCACCTGTAGATATTCCCTCAGTCTGGAGAGGCTTTAGGACACATTTTTTA  
>HPV69\_Alpha\_6970418\_nt4661\_Genome\_Tile|1  
GATATTCCCTCAGTCTGGAGAGGCTTTAGGACACATTTTTTACTAGCACATCTACTGCCGGT  
>HPV69\_Alpha\_6970418\_nt4901\_Genome\_Tile|1  
TTTATTACCTTTGATAATCCTGCATATGAACCTATGGACACTACCCTCACATTTTCTGCA  
>HPV69\_Alpha\_6970418\_nt4921\_Genome\_Tile|1  
TGCATATGAACCTATGGACACTACCCTCACATTTTCTGCAGATAGCCACGTGGCCCCCTGA  
>HPV69\_Alpha\_6970418\_nt5121\_Genome\_Tile|1  
ATCATGACATAAGTCCTATACATGCTACAGAGGAAGCTATTGAATTACAACCTTTAATTA  
>HPV69\_Alpha\_6970418\_nt5141\_Genome\_Tile|1  
CATGCTACAGAGGAAGCTATTGAATTACAACCTTTAATTACTTCAGAACAGCACTCTACA  
>HPV69\_Alpha\_6970418\_nt5161\_Genome\_Tile|1  
TGAATTACAACCTTTAATTACTTCAGAACAGCACTCTACACCATTGTTTGATGTTTATGC  
>HPV69\_Alpha\_6970418\_nt5181\_Genome\_Tile|1  
CTTCAGAACAGCACTCTACACCATTGTTTGATGTTTATGCTGATGCTGACCCTGCCCCCTA  
>HPV69\_Alpha\_6970418\_nt5201\_Genome\_Tile|1  
CCATTGTTTGATGTTTATGCTGATGCTGACCCTGCCCCCTACATTTACATTTCCATCTACT  
>HPV69\_Alpha\_6970418\_nt5221\_Genome\_Tile|1  
TGATGCTGACCCTGCCCCCTACATTTACATTTCCATCTACTACACCTACTACAATCCCTAG  
>HPV69\_Alpha\_6970418\_nt5241\_Genome\_Tile|1  
CATTTACATTTCCATCTACTACACCTACTACAATCCCTAGATTTTCTTCTACAATATTTT  
>HPV69\_Alpha\_6970418\_nt5261\_Genome\_Tile|1  
ACACCTACTACAATCCCTAGATTTTCTTCTACAATATTTTCAACCACTAGTAGTGCACCC  
>HPV69\_Alpha\_6970418\_nt5281\_Genome\_Tile|1  
ATTTTCTTCTACAATATTTTCAACCACTAGTAGTGCACCCTTAAATGTTACCATACCTCT  
>HPV69\_Alpha\_6970418\_nt5301\_Genome\_Tile|1  
CAACCACTAGTAGTGCACCCTTAAATGTTACCATACCTCTATCTACATCATTTGATATAC  
>HPV69\_Alpha\_6970418\_nt5321\_Genome\_Tile|1  
TTAAATGTTACCATACCTCTATCTACATCATTTGATATACCTATATATAACGGCCCTGAC  
>HPV69\_Alpha\_6970418\_nt5361\_Genome\_Tile|1  
CTATATATAACGGCCCTGACATTTATGCTCCTGTACCTTCTTCCACATGGCCTTATATTC  
>HPV69\_Alpha\_6970418\_nt7181\_Genome\_Tile|1  
GTGTTTTCTGTGTTGTGTGGTTTACTGCATGCTTGTTATTTAATAAAACAATGAATGTGTT  
>HPV69\_Alpha\_6970418\_nt7201\_Genome\_Tile|1  
TTTACTGCATGCTTGTTATTTAATAAAACAATGAATGTGTTGTTATTTGTTATTTCTTCCTC  
>HPV69\_Alpha\_6970418\_nt7221\_Genome\_Tile|1  
TAATAAAACAATGAATGTGTTGTATTTGTTATTTCTTCCTCCGTAGGGTATAGGGAAGTAA  
>HPV69\_Alpha\_6970418\_nt7241\_Genome\_Tile|1  
GTATTTGTTATTTCTTCCTCCGTAGGGTATAGGGAAGTAACTTAGGTAGTGTTTAGGTG  
>HPV69\_Alpha\_6970418\_nt7401\_Genome\_Tile|1  
CTTGGCTTGCCTAGACGTGGCTCACCTACATTACTCACATATCTTTTAAACAATAGTTGCA  
>HPV69\_Alpha\_6970418\_nt7541\_Genome\_Tile|1  
GTTGGCTAGCAGTTTTACTGTTTTATGCCAATATATGTCTGACACATTCCTTTTAAACAA  
>HPV91\_Alpha\_22023568\_nt0041\_Genome\_Tile|1  
CGGTGCTGCACACCTTACATTCTTTGTGGTTATTAGTAACAATTATTATGCTTGTACTA  
>HPV91\_Alpha\_22023568\_nt0381\_Genome\_Tile|1  
AAAATTTTATGGTAAAATAAGCCAATATAGGCATTTTAAGTACGCGGCATTAGCAGTAAC  
>HPV91\_Alpha\_22023568\_nt0421\_Genome\_Tile|1  
TACGCGGCATTAGCAGTAACAGTAGAGGAAGAAACACAACAAACTGTATTCGAGTTGTGC



>HPV91\_Alpha\_22023568\_nt0441\_Genome\_Tile|1  
AGTAGAGGAAGAAACACAACAACTGTATTCGAGTTGTGCATTTCGCTGTTGTAAGTGCCA  
>HPV91\_Alpha\_22023568\_nt0461\_Genome\_Tile|1  
AAACTGTATTCGAGTTGTGCATTTCGCTGTTGTAAGTGCCACAAGCCATTGTCGCCTATAG  
>HPV91\_Alpha\_22023568\_nt0521\_Genome\_Tile|1  
AAAAGGTGCAGCACATTGTGCAAAAAGCCCACTTTTTTTTACATAAGTAACGCGTGGAAGG  
>HPV91\_Alpha\_22023568\_nt0541\_Genome\_Tile|1  
CAAAAAGCCCACTTTTTTTTACATAAGTAACGCGTGGAAGGGATATTGCCTACACTGCTGG  
>HPV91\_Alpha\_22023568\_nt1681\_Genome\_Tile|1  
CCATATGTTATTAAAAGAACAACATTATACCTACATACCCAATGGGTTACATGCCGATG  
>HPV91\_Alpha\_22023568\_nt1841\_Genome\_Tile|1  
ATATTGATACAGCCTCCAAAATTACAAAGCGCTCCAGCAGCACTGTTTTGGTTTAGAGCC  
>HPV91\_Alpha\_22023568\_nt3581\_Genome\_Tile|1  
AACTGTTGGAGGAGAGCCATTGGACAGTAGAGACCCACGAATCATCCCTAAGCATTCGAA  
>HPV91\_Alpha\_22023568\_nt3821\_Genome\_Tile|1  
TACATTAACATATGCTAGTGTAACAACAAAGGGAGGCGTTTTTAGCTAATGTAAAAATTCC  
>HPV91\_Alpha\_22023568\_nt3841\_Genome\_Tile|1  
TACAACAAAGGGAGGCGTTTTTAGCTAATGTAAAAATTCCCACAACAATTAAACATTGTT  
>HPV91\_Alpha\_22023568\_nt3861\_Genome\_Tile|1  
TTAGCTAATGTAAAAATTCCCACAACAATTAAACATTGTTTAGGATTTTTAACAATTATG  
>HPV91\_Alpha\_22023568\_nt3921\_Genome\_Tile|1  
TAAATAGTACCCTATGAATTTGTAAAACCTACCTTGTATATTGCTTGTATAGTGGAAGTGT  
>HPV91\_Alpha\_22023568\_nt3941\_Genome\_Tile|1  
TGTAAAACTACCTTGTATATTGCTTGTATAGTGGAAGTGTACTGTGACGTTAAGGGTGT  
>HPV91\_Alpha\_22023568\_nt4041\_Genome\_Tile|1  
TTTTGTTAATAGATGTAAAGCTTGGCATTTTATTAGTTAATGTGCTTGTTCGATAATTG  
>HPV91\_Alpha\_22023568\_nt4161\_Genome\_Tile|1  
CTTCTATACTTTACTTTTTATCTTGGTCTGCACTTATATCACTTACTAACGTGTTTATAT  
>HPV91\_Alpha\_22023568\_nt4181\_Genome\_Tile|1  
TCTTGGTCTGCACTTATATCACTTACTAACGTGTTTATATTAATACTTGTAGTGTGGTTT  
>HPV91\_Alpha\_22023568\_nt4201\_Genome\_Tile|1  
ACTTACTAACGTGTTTATATTAATACTTGTAGTGTGGTTTGTACCGGCCCTTTTATTACA  
>HPV91\_Alpha\_22023568\_nt4221\_Genome\_Tile|1  
TAATACTTGTAGTGTGGTTTGTACCGGCCCTTTTATTACATTTACATATTACATATTACA  
>HPV91\_Alpha\_22023568\_nt4281\_Genome\_Tile|1  
TTGCAAAATTGAAACACAGCAATTGTAAATACATTGGTGTGCATATATTTGTACCTAGCAT  
>HPV91\_Alpha\_22023568\_nt4301\_Genome\_Tile|1  
ATTGTAAATACATTGGTGTGCATATATTTGTACCTAGCATTATGTTAACTTGTCAATTTG  
>HPV91\_Alpha\_22023568\_nt4421\_Genome\_Tile|1  
TGTTATTAGTGTTTCATTATAGGACAGTTAAGCTGCTGCCCTCCAGCAAATAAACAAATT  
>HPV91\_Alpha\_22023568\_nt4701\_Genome\_Tile|1  
GAAGAACAGGCTATGTACCTATTCCAACAGGTCGCACAGGTACTGTTCCCTAAAGTTAGTG  
>HPV91\_Alpha\_22023568\_nt4821\_Genome\_Tile|1  
CTTCCATTGTTTCATTAAATTGAAGAATCAAGTATAATTGAGTCCGGGGCTCCAATCACAA  
>HPV91\_Alpha\_22023568\_nt4881\_Genome\_Tile|1  
CTATACCATCCCATGGTGGTTTTGAGGTAACATCATCTGGGTCAGATGTCCCAGCCATTT  
>HPV91\_Alpha\_22023568\_nt4901\_Genome\_Tile|1  
TTTGAGGTAACATCATCTGGGTCAGATGTCCCAGCCATTTTAGATGTGTCACCAACAACA  
>HPV91\_Alpha\_22023568\_nt5061\_Genome\_Tile|1  
TTTCCCAATCTACTATTACAGCCCATAGTGCAGAAGACATTCCCTATGGATACATTTGTTG  
>HPV91\_Alpha\_22023568\_nt5481\_Genome\_Tile|1  
TTAGTCCAATTGCAACACAGGAATCTATTGAATTACAGCCCCTAGGACATTCTACTGTTA  
>HPV91\_Alpha\_22023568\_nt5501\_Genome\_Tile|1  
GAATCTATTGAATTACAGCCCCTAGGACATTCTACTGTTAATGTTCCCTGATGCCACTGAC  
>HPV91\_Alpha\_22023568\_nt5521\_Genome\_Tile|1

CCTAGGACATTCTACTGTTAATGTTCTGATGCCACTGACTTGTATGATATTTATGCAGA  
>HPV91\_Alpha\_22023568\_nt5541\_Genome\_Tile|1  
ATGTTCTCTGATGCCACTGACTTGTATGATATTTATGCAGATGATAGCATTTTAGATGTAC  
>HPV91\_Alpha\_22023568\_nt5561\_Genome\_Tile|1  
TTGTATGATATTTATGCAGATGATAGCATTTTAGATGTACCTCATACCAACACCAATGTG  
>HPV91\_Alpha\_22023568\_nt5601\_Genome\_Tile|1  
CTCATACCAACACCAATGTGTCTACACTGCCCTAACACAACAAAAATTGTTAACTACTACAG  
>HPV91\_Alpha\_22023568\_nt5621\_Genome\_Tile|1  
TCTACACTGCCCTAACACAACAAAAATTGTTAACTACTACAGTCCCACTTGCAACAGTACCT  
>HPV91\_Alpha\_22023568\_nt5701\_Genome\_Tile|1  
ACCTGATATTACATTTCTACAGTGCCACTTAGTGTCCCCTATGTGCCATTGTCACCGTC  
>HPV91\_Alpha\_22023568\_nt5721\_Genome\_Tile|1  
CAGTGCCACTTAGTGTCCCCTATGTGCCATTGTCACCGTCTGTTACACCTTCTGCAGTAT  
>HPV91\_Alpha\_22023568\_nt5761\_Genome\_Tile|1  
TGTTACACCTTCTGCAGTATCAATATATGGCACAGATTTTTATTACATCCTTCATTGTT  
>HPV91\_Alpha\_22023568\_nt6001\_Genome\_Tile|1  
TGGGCCACCTTTTTTCTCTATAAAAAATAATTCTGGTAAAGTAATTGTTCTTAAAGTTT  
>HPV91\_Alpha\_22023568\_nt6561\_Genome\_Tile|1  
GATTATTTAGGAATGGCAGCCGAGCCATACGGAAATAGTTTATTTTTCTTTTACGTAGG  
>HPV91\_Alpha\_22023568\_nt6641\_Genome\_Tile|1  
TTTTCTTTAATAGGGCTGGTACTACAGGCGATGCTGTCCCTAAGGATTTGTATATTGCAGG  
>HPV91\_Alpha\_22023568\_nt6661\_Genome\_Tile|1  
CTACAGGCGATGCTGTCCCTAAGGATTTGTATATTGCAGGAACAGGCAACAGGGCGAACA  
>HPV91\_Alpha\_22023568\_nt6681\_Genome\_Tile|1  
AAGGATTTGTATATTGCAGGAACAGGCAACAGGGCGAACATAGCAGGCAGTATATATTAT  
>HPV91\_Alpha\_22023568\_nt6861\_Genome\_Tile|1  
GTTGTGGATACAACCTCGCAGCACTAACTTAACCTTGTGTGCATCCACTGAGTCTGTGCTA  
>HPV91\_Alpha\_22023568\_nt6881\_Genome\_Tile|1  
CACTAACTTAACCTTGTGTGCATCCACTGAGTCTGTGCTACCTACTACATATGACAACAC  
>HPV91\_Alpha\_22023568\_nt6901\_Genome\_Tile|1  
CATCCACTGAGTCTGTGCTACCTACTACATATGACAACACAAAGTTCAAAGAATATTTAA  
>HPV91\_Alpha\_22023568\_nt7001\_Genome\_Tile|1  
ATGCATTATAACACTTAATCCAGAGGTAATGACATACATCCACACTATGGATGCATCATT  
>HPV91\_Alpha\_22023568\_nt7081\_Genome\_Tile|1  
GGGTATCCCCCTCCAGCCACGGCATCACTAGAGGATACTTATCGCTTTTTGGCTAATAAGG  
>HPV91\_Alpha\_22023568\_nt7141\_Genome\_Tile|1  
CAATTGCCTGTCAAAAAAATGTCCCAACAAAAGCCAAAGAGGACCCATACAAAAACTATA  
>HPV91\_Alpha\_22023568\_nt7341\_Genome\_Tile|1  
TCAGCGCCTGCCTCCAAACGAAAGAAAATAAGCGATAACTATTATATTACTGTATGTTG  
>HPV91\_Alpha\_22023568\_nt7381\_Genome\_Tile|1  
TATTATATTACTGTATGTTGTGTATGTGCATTTGTGTATTGTATGTGGTTTGTATACATG  
>HPV91\_Alpha\_22023568\_nt7441\_Genome\_Tile|1  
TGTGTGTGTATTTATGTATTTATACATGTGTGTTATGTGTGCTGTATGGAATGAGGAATA  
>HPV91\_Alpha\_22023568\_nt7581\_Genome\_Tile|1  
TGTGTTTCTTTCTGTTTGTGTTATGAATGTCCAGCGTTGGGGCAGCGTTGGGGTTTAG  
>HPV91\_Alpha\_22023568\_nt7601\_Genome\_Tile|1  
TGTTATGAATGTCCAGCGTTGGGGCAGCGTTGGGGTTTAGGTCTGGTGGTAGTCATGGCG  
>HPV91\_Alpha\_22023568\_nt7621\_Genome\_Tile|1  
GGGGCAGCGTTGGGGTTTAGGTCTGGTGGTAGTCATGGCGTCTGTTTGGTTACAAAAAGT  
>HPV91\_Alpha\_22023568\_nt7741\_Genome\_Tile|1  
ATAATTGCAAGGTTACATTGACCTGCCAAAATATGTTGGCACAGTATAATTTCCCTTTGG  
>HPV91\_Alpha\_22023568\_nt7841\_Genome\_Tile|1  
TATAAATTTTACCTTTTTTACCTTTGTGTTGCTAAGGTTTTATTACTTTTAACCACATAC  
>HPV91\_Alpha\_22023568\_nt7861\_Genome\_Tile|1  
CTTTGTGTTGTCTAAGGTTTTATTACTTTTAACCACATACATGTTTTATGGCTTTGCTTA

>HPV91\_Alpha\_22023568\_nt7881\_Genome\_Tile|1  
TATTACTTTTAACCACATACATGTTTTATGGCTTTTGCTTAAAAGCTTTTTTGGCTCACAT  
>HPV91\_Alpha\_22023568\_nt7901\_Genome\_Tile|1  
ATGTTTTATGGCTTTTGCTTAAAAGCTTTTTTGGCTCACATAACAATAAAGCACCCATAAA  
>HPV35\_Alpha\_333050\_nt0061\_Genome\_Tile|1  
GCAGAAGTGCACAAAAAGCAGAAGTGGACAGACATTGTAAGGTGCGGTATGTTTCAGGA  
>HPV35\_Alpha\_333050\_nt0081\_Genome\_Tile|1  
AGAAGTGGACAGACATTGTAAGGTGCGGTATGTTTCAGGACCCAGCTGAACGACCTTACA  
>HPV35\_Alpha\_333050\_nt0141\_Genome\_Tile|1  
AACTGCATGATTTGTGCAACGAGGTAGAAGAAAGCATCCATGAAATTTGTTTGAATTGTG  
>HPV35\_Alpha\_333050\_nt0161\_Genome\_Tile|1  
GAGGTAGAAGAAAGCATCCATGAAATTTGTTTGAATTGTGTATACTGCAACAAGAATTA  
>HPV35\_Alpha\_333050\_nt0361\_Genome\_Tile|1  
TGGAGAAACGTTAGAAAAACAATGCAACAAACAGTTATGTCATTTATTAATTAGGTGTAT  
>HPV35\_Alpha\_333050\_nt0461\_Genome\_Tile|1  
CATTTAGAAGAAAAAAACGATTCCATAACATCGGTGGACGGTGGACAGGTGCGGTGTATG  
>HPV35\_Alpha\_333050\_nt0481\_Genome\_Tile|1  
ATTCCATAACATCGGTGGACGGTGGACAGGTGCGGTGTATGTCCTGTTGGAAACCAACACG  
>HPV35\_Alpha\_333050\_nt0501\_Genome\_Tile|1  
GGTGGACAGGTGCGGTGTATGTCCTGTTGGAAACCAACAGTAGAGAAACCGAGGTGTAAT  
>HPV35\_Alpha\_333050\_nt0701\_Genome\_Tile|1  
AACCAGACACCTCCAATTATAATATTGTAACGTCCTGTTGTAAATGTGAGGCGACACTAC  
>HPV35\_Alpha\_333050\_nt0721\_Genome\_Tile|1  
AATATTGTAACGTCCTGTTGTAAATGTGAGGCGACACTACGTCCTGTGTGTACAGAGCACA  
>HPV35\_Alpha\_333050\_nt0921\_Genome\_Tile|1  
GTTTTTTGTAGAAGCAGTAGTTAGTAGACGTACGGGATCCAGTGTAGAGGACGAAAATGA  
>HPV35\_Alpha\_333050\_nt0981\_Genome\_Tile|1  
AGATGACTGTGACAGGGGGGAGGATATGGTGGACTTTATAAATGATACAGATATATTAAA  
>HPV35\_Alpha\_333050\_nt1001\_Genome\_Tile|1  
AGGATATGGTGGACTTTATAAATGATACAGATATATTAAACATACAGGCAGAAACAGAGA  
>HPV35\_Alpha\_333050\_nt1121\_Genome\_Tile|1  
TAAACGAAAGTATGCTAGTAGTCCACTTAGCAGCGTGAGCTTATGTGTTAATAATAACA  
>HPV35\_Alpha\_333050\_nt1141\_Genome\_Tile|1  
AGTCCACTTAGCAGCGTGAGCTTATGTGTTAATAATAACATAAGTCCACGTTTAAAAGCT  
>HPV35\_Alpha\_333050\_nt1161\_Genome\_Tile|1  
CTTATGTGTTAATAATAACATAAGTCCACGTTTAAAAGCTATTTGCATTGAAAATAAAAA  
>HPV35\_Alpha\_333050\_nt1281\_Genome\_Tile|1  
GGAAATACACGAGATACAACAGGTAGAGGGGCATGATACAGTTGAACAATGTAGTATGGG  
>HPV35\_Alpha\_333050\_nt1301\_Genome\_Tile|1  
AGGTAGAGGGGCATGATACAGTTGAACAATGTAGTATGGGCAGTGGGGATAGTATAACCT  
>HPV35\_Alpha\_333050\_nt1321\_Genome\_Tile|1  
GTTGAACAATGTAGTATGGGCAGTGGGGATAGTATAACCTCTAGTAGCGATGAAAGACAT  
>HPV35\_Alpha\_333050\_nt1361\_Genome\_Tile|1  
CTAGTAGCGATGAAAGACATGATGAGACTCCAACGCGAGACATAATACAAATACTAAAAT  
>HPV35\_Alpha\_333050\_nt1381\_Genome\_Tile|1  
GATGAGACTCCAACGCGAGACATAATACAAATACTAAAATGTAGTAATGCAAACGCAGCT  
>HPV35\_Alpha\_333050\_nt1441\_Genome\_Tile|1  
ATGTTGGCTAAATTTAAAGAACTATTTGGTATTAGTTTTACAGAACTTATTAGACCATTT  
>HPV35\_Alpha\_333050\_nt1461\_Genome\_Tile|1  
ACTATTTGGTATTAGTTTTACAGAACTTATTAGACCATTTAAGAGTGATAAATCCACATG  
>HPV35\_Alpha\_333050\_nt1521\_Genome\_Tile|1  
TACAGATTGGTGTGTGGCCGATTTGGAATAGCCCCAAGTGTGGCGAACTTTAAACATAT  
>HPV35\_Alpha\_333050\_nt1581\_Genome\_Tile|1  
AACATATGTATACATATACAATGTTTATCGTGTTTCATGGGGCTATGGTAATTCTAGCATT  
>HPV35\_Alpha\_333050\_nt1601\_Genome\_Tile|1

ATGTTTATCGTGTTTCATGGGGCTATGGTAATTCTAGCATTATTACGATTTAAAGTCGAAA  
>HPV35\_Alpha\_333050\_nt1621\_Genome\_Tile|1  
GCTATGGTAATTCTAGCATTATTACGATTTAAAGTCGAAAAACGAGAACAACAATTGAAA  
>HPV35\_Alpha\_333050\_nt1641\_Genome\_Tile|1  
ATTACGATTTAAAGTCGAAAAACGAGAACAACAATTGAAAACCTATTGATGCTAAATTGCT  
>HPV35\_Alpha\_333050\_nt1661\_Genome\_Tile|1  
AACGAGAACAACAATTGAAAACCTATTGATGCTAAATTGCTATGTATTTTCAGCTGCAAGTA  
>HPV35\_Alpha\_333050\_nt1681\_Genome\_Tile|1  
ACTATTGATGCTAAATTGCTATGTATTTTCAGCTGCAAGTATGCTAATACAACCACCAAAA  
>HPV35\_Alpha\_333050\_nt2161\_Genome\_Tile|1  
GATTTTGTGGCATTTTTATCTGCACTAAAAAATTTTTTACATGGTGTGCCTAAAAAAAAT  
>HPV35\_Alpha\_333050\_nt2181\_Genome\_Tile|1  
TGCCTAAAAAATTTTTTACATGGTGTGCCTAAAAAATTTGCATACTAATATATGGAGC  
>HPV35\_Alpha\_333050\_nt2241\_Genome\_Tile|1  
ACCAAACACAGGTAAATCATTATTTGGAATGAGTCTAATGCATTTCTTACAAGGAGCTAT  
>HPV35\_Alpha\_333050\_nt2421\_Genome\_Tile|1  
CACTAGATGGAAATCCTATATTTTCATTTAGATGTAAAGCATTAAGCATAGTGCATATAAT  
>HPV35\_Alpha\_333050\_nt2481\_Genome\_Tile|1  
GCCCACCTTTACTTATTACATCAATATAAATGCAGGCAGGCAAGATGACAGGTGGCCATACTT  
>HPV35\_Alpha\_333050\_nt2761\_Genome\_Tile|1  
TAGCACATGTTTGTCTGATCACATACAGTATTGGAAACTGATTCGTCTTGAATGTGCAGT  
>HPV35\_Alpha\_333050\_nt2921\_Genome\_Tile|1  
CAATTAATGTTAGAGACATTAAATACAACCTGAGTATAGCACAGAGGACTGGACACTGCAA  
>HPV35\_Alpha\_333050\_nt2961\_Genome\_Tile|1  
CAGAGGACTGGACACTGCAAGAAACAAGTATTGAACTATATACAACAGTTCCCTACAAGAT  
>HPV35\_Alpha\_333050\_nt2981\_Genome\_Tile|1  
GAAACAAGTATTGAACTATATACAACAGTTCCTACAAGATGTTTAAAAAAGATGTTTAT  
>HPV35\_Alpha\_333050\_nt3001\_Genome\_Tile|1  
TACAACAGTTCCTACAAGATGTTTAAAAAAGATGTTTATACTGTGGAAGCACAATTTGA  
>HPV35\_Alpha\_333050\_nt3021\_Genome\_Tile|1  
GTTTAAAAAAGATGTTTATACTGTGGAAGCACAATTTGATGGTGATAAACAAAATACTA  
>HPV35\_Alpha\_333050\_nt3041\_Genome\_Tile|1  
ACTGTGGAAGCACAATTTGATGGTGATAAACAAAATACTATGCATTATACTAATTGGACA  
>HPV35\_Alpha\_333050\_nt3061\_Genome\_Tile|1  
TGGTGATAAACAAAATACTATGCATTATACTAATTGGACACATATATATATATATTAGAGGA  
>HPV35\_Alpha\_333050\_nt3081\_Genome\_Tile|1  
TGCATTATACTAATTGGACACATATATATATATATTAGAGGACAGTATATGTACTGTTGTAA  
>HPV35\_Alpha\_333050\_nt3101\_Genome\_Tile|1  
CATATATATATATTAGAGGACAGTATATGTACTGTTGTAAAGGGACTGGTAAATTATAAA  
>HPV35\_Alpha\_333050\_nt3121\_Genome\_Tile|1  
CAGTATATGTACTGTTGTAAAGGGACTGGTAAATTATAAAGGTATTTATTATGTGCATCA  
>HPV35\_Alpha\_333050\_nt3141\_Genome\_Tile|1  
AGGGACTGGTAAATTATAAAGGTATTTATTATGTGCATCAGGGGTAGAAACATATTATG  
>HPV35\_Alpha\_333050\_nt3161\_Genome\_Tile|1  
GGTATTTATTATGTGCATCAGGGGTGTAGAAACATATTATGTTACTTTTAGGGAAGAGGCT  
>HPV35\_Alpha\_333050\_nt3301\_Genome\_Tile|1  
CACAGAACTATCCACTGCTGAAATTGCTACACAGCTACACGCCTACAACACCACCGAGAC  
>HPV35\_Alpha\_333050\_nt3321\_Genome\_Tile|1  
AAATTGCTACACAGCTACACGCCTACAACACCACCGAGACCCATACCAAAGCCTGCTCCG  
>HPV35\_Alpha\_333050\_nt3401\_Genome\_Tile|1  
AAGACAAATCACAAACGACTTCGAGGGGGTACCGAGCTCCCTACAACCCACCAAGCGA  
>HPV35\_Alpha\_333050\_nt3421\_Genome\_Tile|1  
TCGAGGGGGTACCGAGCTCCCTACAACCCACCAAGCGAGTGCGACTCAGTGCCGTGGA  
>HPV35\_Alpha\_333050\_nt3441\_Genome\_Tile|1  
CCTACAACCCACCAAGCGAGTGCGACTCAGTGCCGTGGACAGTGTGACAGAGGGGTCT

>HPV35\_Alpha\_333050\_nt3481\_Genome\_Tile|1  
CAGTGTGACAGAGGGGTCTACTCTACATCTGACTGCACAAACAAAGACCGGTGTGGTAG  
>HPV35\_Alpha\_333050\_nt3501\_Genome\_Tile|1  
ACTCTACATCTGACTGCACAAACAAAGACCGGTGTGGTAGTTGTAGTACAACCTACACCTA  
>HPV35\_Alpha\_333050\_nt3581\_Genome\_Tile|1  
GCAAATACATTAAAGTGTTCAAGATATAGATTGGGTAAATATAAAGCATTGTATCAAGAT  
>HPV35\_Alpha\_333050\_nt3621\_Genome\_Tile|1  
ATAAAGCATTTGTATCAAGATGCTTCATCTACATGGAGATGGACATGTACAAACGATAAAA  
>HPV35\_Alpha\_333050\_nt3661\_Genome\_Tile|1  
GACATGTACAAACGATAAAAAACAAATAGCAATTGTAACATTAACCTTACACAACAGAATA  
>HPV35\_Alpha\_333050\_nt3681\_Genome\_Tile|1  
AACAAATAGCAATTGTAACATTAACCTTACACAACAGAATATCAAAGGGATAAATTTTTTAA  
>HPV35\_Alpha\_333050\_nt3701\_Genome\_Tile|1  
TTAACTTACACAACAGAATATCAAAGGGATAAATTTTTTAACTACAGTAAAAATACCTAAC  
>HPV35\_Alpha\_333050\_nt3761\_Genome\_Tile|1  
ACAGTTACAGTGTCTAAAGGATATATGTCTATATGATAGACCTTACAGCTTCCAGTACTG  
>HPV35\_Alpha\_333050\_nt3781\_Genome\_Tile|1  
ATATATGTCTATATGATAGACCTTACAGCTTCCAGTACTGTGTTGCTGTGCTTTTTGTG  
>HPV35\_Alpha\_333050\_nt3861\_Genome\_Tile|1  
CTTGTGTCTGCTTGTACGTTTCGCTATTGCTATCTGTGTCAATTATACTCAGCATTAATATT  
>HPV35\_Alpha\_333050\_nt3921\_Genome\_Tile|1  
ACTGGTTTTAATACTGTGGGTTACTGTAGCAACACCACTACTTGCTTTTGTGTTTCTTG  
>HPV35\_Alpha\_333050\_nt3941\_Genome\_Tile|1  
TTACTGTAGCAACACCACTACTTGCTTTTGTGTTTCTTGCTTTTGTATATACCTATGGA  
>HPV35\_Alpha\_333050\_nt3961\_Genome\_Tile|1  
CTTGCTTTTGTGTTTCTTGCTTTTGTATATACCTATGGATGATTAACGCTCATGCACAA  
>HPV35\_Alpha\_333050\_nt3981\_Genome\_Tile|1  
CTTTTGTATATACCTATGGATGATTAACGCTCATGCACAATATTTGGCAGTACAGTAATT  
>HPV35\_Alpha\_333050\_nt4021\_Genome\_Tile|1  
TATTTGGCAGTACAGTAATTGTATACAAACATTGTGTTTGGTACTGTGTAACATGTGTGT  
>HPV35\_Alpha\_333050\_nt4041\_Genome\_Tile|1  
GTATACAAACATTGTGTTTGGTACTGTGTAACATGTGTGTATGGTGGTTTTATTTTTTGT  
>HPV35\_Alpha\_333050\_nt4101\_Genome\_Tile|1  
TGTTTCATTGTATATTTTTGTTTTTTTACTGTTTTTAAACATTTTTTATTTCTGTGTTTTTAA  
>HPV35\_Alpha\_333050\_nt4121\_Genome\_Tile|1  
TTTTTACTGTTTTTAAACATTTTTTATTTCTGTGTTTTTAAATAAATTGATCACATGGTATA  
>HPV35\_Alpha\_333050\_nt4141\_Genome\_Tile|1  
TTTTTATTTCTGTGTTTTTAAATAAATTGATCACATGGTATAACCATGCGACACAAAAGGTC  
>HPV35\_Alpha\_333050\_nt4541\_Genome\_Tile|1  
GAGTCTGGTGCCCTGTTGTACACCAAGGGTCCCACCTACAACAGGTTTTACAATAACC  
>HPV35\_Alpha\_333050\_nt4561\_Genome\_Tile|1  
TACACCAAGGGTCCCACCTACAACAGGTTTTACAATAACCACATCTACAGATACCACACC  
>HPV35\_Alpha\_333050\_nt4601\_Genome\_Tile|1  
ACATCTACAGATACCACACCTGCTATTTTAGATGTGACATCCATAAGTACACATGATAAT  
>HPV35\_Alpha\_333050\_nt4761\_Genome\_Tile|1  
AAGAAATCCCTATGGATACTTTTATTGTTTCCACAGACAGCAATAATAACTAATAGCA  
>HPV35\_Alpha\_333050\_nt4941\_Genome\_Tile|1  
ATCCTGCATATGAAGGCCTTAACCCGTGATACAACCTTACAATTTGAGCATGAGGATATTA  
>HPV35\_Alpha\_333050\_nt4961\_Genome\_Tile|1  
AACCCTGATACAACCTTACAATTTGAGCATGAGGATATTAGCTTAGCTCCGGATCCTGAC  
>HPV35\_Alpha\_333050\_nt5061\_Genome\_Tile|1  
CTAGGAAAGGCCTATTAGATATAGTAGAGTAGGTAATAAACGTACTATGCATACACGAA  
>HPV35\_Alpha\_333050\_nt5081\_Genome\_Tile|1  
TATAGTAGAGTAGGTAATAAACGTACTATGCATACACGAAGTGGAAAAAGCTATAGGGGCA  
>HPV35\_Alpha\_333050\_nt5141\_Genome\_Tile|1

CGGGTACATTATTATCAGGATTTAAGTAGTATTACTGAAGATATAGAATTACAACCCTTA  
>HPV35\_Alpha\_333050\_nt5161\_Genome\_Tile|1  
TTTAAGTAGTATTACTGAAGATATAGAATTACAACCCTTACAACATGTACCATCCTCTTT  
>HPV35\_Alpha\_333050\_nt5181\_Genome\_Tile|1  
ATATAGAATTACAACCCTTACAACATGTACCATCCTCTTTACCACATACCACTGTTTCAA  
>HPV35\_Alpha\_333050\_nt5201\_Genome\_Tile|1  
CAACATGTACCATCCTCTTTACCACATACCACTGTTTCAACATCATTAATGATGGTATG  
>HPV35\_Alpha\_333050\_nt5221\_Genome\_Tile|1  
ACCACATACCACTGTTTCAACATCATTAATGATGGTATGTTTGATATTTATGCTCCTAT  
>HPV35\_Alpha\_333050\_nt5241\_Genome\_Tile|1  
CATCATTAATGATGGTATGTTTGATATTTATGCTCCTATAGATACTGAGGAAGATATTA  
>HPV35\_Alpha\_333050\_nt5261\_Genome\_Tile|1  
TTTGATATTTATGCTCCTATAGATACTGAGGAAGATATTATATTTTCAGCATCTTCTAAC  
>HPV35\_Alpha\_333050\_nt5281\_Genome\_Tile|1  
AGATACTGAGGAAGATATTATATTTTCAGCATCTTCTAACAATACTTTATATACTACATC  
>HPV35\_Alpha\_333050\_nt5301\_Genome\_Tile|1  
TATTTTCAGCATCTTCTAACAATACTTTATATACTACATCTAACACTGCATATGTTCCCTA  
>HPV35\_Alpha\_333050\_nt5321\_Genome\_Tile|1  
AATACTTTATATACTACATCTAACACTGCATATGTTCCCTAGCAATACTACTATACCATTA  
>HPV35\_Alpha\_333050\_nt5381\_Genome\_Tile|1  
AGTAGTGGCTATGATATTCCTATAACAGCAGGGCCAGACATTGTATTTAACTCTAATACT  
>HPV35\_Alpha\_333050\_nt5421\_Genome\_Tile|1  
TTGTATTTAACTCTAATACTATTACTAACTCTGTACTACCGGTACCCACAGGTCCTATAT  
>HPV35\_Alpha\_333050\_nt5461\_Genome\_Tile|1  
GGTACCCACAGGTCCTATATATTCTATTATTGCAGATGGGGGTGACTTTTATTTACACCC  
>HPV35\_Alpha\_333050\_nt5701\_Genome\_Tile|1  
TAGCTGTGGGTCACCCATACTATGCTATTAAAAACAAGATTCTAATAAAAATAGCAGTAC  
>HPV35\_Alpha\_333050\_nt5721\_Genome\_Tile|1  
TATGCTATTAAAAACAAGATTCTAATAAAAATAGCAGTACCCAAGGTATCTGGTTTGCAA  
>HPV35\_Alpha\_333050\_nt5961\_Genome\_Tile|1  
GAAAATCTTAATAAATATGTTGGTAACCTCTGGTAACCTCTGGTACAGATAACAGGGAATGC  
>HPV35\_Alpha\_333050\_nt6101\_Genome\_Tile|1  
ACCTTGTAATGCTAACCAGGTAAAAGCAGGAGAATGTCCTCCTTTGGAGTTACTAAACAC  
>HPV35\_Alpha\_333050\_nt6201\_Genome\_Tile|1  
GCAATGGATTTTACTACATTACAAGCTAATAAAAAGTGATGTTCCCCTAGATATATGCAGT  
>HPV35\_Alpha\_333050\_nt6381\_Genome\_Tile|1  
GTAGGTGAAACAGTACCTGCAGACCTATATATTAAGGGTACCACTGGCACATTGCCTAGT  
>HPV35\_Alpha\_333050\_nt6401\_Genome\_Tile|1  
AGACCTATATATTAAGGGTACCACTGGCACATTGCCTAGTACTAGTTATTTTCCCTACTCC  
>HPV35\_Alpha\_333050\_nt6581\_Genome\_Tile|1  
TACAACCCGTAGTACAAATATGTCTGTGTGTTCTGCTGTGTCTTCTAGTGACAGTACATA  
>HPV35\_Alpha\_333050\_nt6821\_Genome\_Tile|1  
GGACACATATCGCTATGTAACATCACAGGCTGTAACCTGTCAAAAACCCAGTGCACCAAA  
>HPV35\_Alpha\_333050\_nt6841\_Genome\_Tile|1  
CATCACAGGCTGTAACCTGTCAAAAACCCAGTGCACCAAAACCTAAAGATGATCCATTAA  
>HPV35\_Alpha\_333050\_nt6961\_Genome\_Tile|1  
TTCCGTTGGGCCGTAAATTTTGTTACAAGCAGGACTAAAGGCCAGGCCTAATTTTAGAT  
>HPV35\_Alpha\_333050\_nt6981\_Genome\_Tile|1  
TTGTTACAAGCAGGACTAAAGGCCAGGCCTAATTTTAGATTAGGCAGGCGTGCAGCTCCA  
>HPV35\_Alpha\_333050\_nt7001\_Genome\_Tile|1  
GGCCAGGCCTAATTTTAGATTAGGCAGGCGTGCAGCTCCAGCATCTACATCTAAAAAATC  
>HPV35\_Alpha\_333050\_nt7141\_Genome\_Tile|1  
GTATATATATATTATGTGTTGTGGTGCCTGTTTGTGTTGTACATGGCGTGTAATGTGTGTA  
>HPV35\_Alpha\_333050\_nt7201\_Genome\_Tile|1  
TAATATTGTGCAATGTGTTGTACGTGGGTGTTTTTGTACTTAGTGTGTAGTAGTTCAGTA

>HPV35\_Alpha\_333050\_nt7221\_Genome\_Tile|1  
TACGTGGGTGTTTTTGTACTTAGTGTGTAGTAGTTCAGTAGCCATAAAGTGATGTGTGTG  
>HPV35\_Alpha\_333050\_nt7241\_Genome\_Tile|1  
TAGTGTGTAGTAGTTCAGTAGCCATAAAGTGATGTGTGTGTTTATAATTAACACTGTATT  
>HPV35\_Alpha\_333050\_nt7281\_Genome\_Tile|1  
TTTATAATTAACACTGTATTGTTGTATGACTATGGTGCACCGATATGAGCTTACATAATT  
>HPV35\_Alpha\_333050\_nt7301\_Genome\_Tile|1  
GTTGTATGACTATGGTGCACCGATATGAGCTTACATAATTACATGACAGCTATATTGTGT  
>HPV35\_Alpha\_333050\_nt7481\_Genome\_Tile|1  
CACTTAATCCTTGTGTTCTGATATATATTGTTTGCCAACTTTATATTGGCTTTTGCCAA  
>HPV35\_Alpha\_333050\_nt7501\_Genome\_Tile|1  
GATATATATTGTTTGCCAACTTTATATTGGCTTTTGCCAACTTTAAACTTGATTCATCT  
>HPV35\_Alpha\_333050\_nt7561\_Genome\_Tile|1  
TGCAGTATTAGTCATTTTTTCATACTTGTGGTCCACCCACACTTGTAACACTTGTAACAGT  
>HPV35\_Alpha\_333050\_nt7641\_Genome\_Tile|1  
TGCATTTCTAAAGGGCTTTAATTGCACACCTTGGCTTTACATATTATGTGTGTTTGCCAA  
>HPV35\_Alpha\_333050\_nt7681\_Genome\_Tile|1  
ATATTATGTGTGTTTGCCAAACACCACCTACACATCCTGCCAACTTTAAGTTAAAACATG  
>HPV35\_Alpha\_333050\_nt7721\_Genome\_Tile|1  
CAACTTTAAGTTAAAACATGCATGTAAAACATTACTCACTGTATTACACATTGTTATATG  
>HPV35\_Alpha\_333050\_nt7741\_Genome\_Tile|1  
CATGTAAAACATTACTCACTGTATTACACATTGTTATATGCACACAGGTGTGTCCAACCG  
>HPV35\_Alpha\_333050\_nt7761\_Genome\_Tile|1  
GTATTACACATTGTTATATGCACACAGGTGTGTCCAACCGATTTGGATTACAGTTTTATA  
>HPVcand86\_Alpha\_15741127\_nt1361\_Genome\_Tile|1  
TTAAGGACCTAGTAAGACAGTTCAAAAAGTGATAGGTCCACATGTGCAGAGTGGGTAGTAG  
>HPVcand86\_Alpha\_15741127\_nt1541\_Genome\_Tile|1  
TACGGTTTAAAGTGTAACAAAAGCAGAGAAACCGTAGCAAAGTGCCTAGGAACCATACTAA  
>HPVcand86\_Alpha\_15741127\_nt2401\_Genome\_Tile|1  
ACAAATGTAAATATTGCAGCAGATGACACCTTTAAATATCTTAGAAGTCGAATGGTCGTC  
>HPVcand86\_Alpha\_15741127\_nt2421\_Genome\_Tile|1  
AGATGACACCTTTAAATATCTTAGAAGTCGAATGGTCGTCTTTCCGTTTCTACAAAAGTG  
>HPVcand86\_Alpha\_15741127\_nt3681\_Genome\_Tile|1  
ATATACCTAAAGGAATTGTGGTAACACAAGGCATTATGTCAATGTGCATATAATAGTAGT  
>HPVcand86\_Alpha\_15741127\_nt3701\_Genome\_Tile|1  
GTAACACAAGGCATTATGTCAATGTGCATATAATAGTAGTTGTTTGTAACATTATATCC  
>HPVcand86\_Alpha\_15741127\_nt3721\_Genome\_Tile|1  
AATGTGCATATAATAGTAGTTGTTTGTAACATTATATCCTGTATGTGAGCCAATTGTAG  
>HPVcand86\_Alpha\_15741127\_nt3761\_Genome\_Tile|1  
TGTATGTGAGCCAATTGTAGCAATTGTGTGTATTACATACCTGGTATATACTGCATCCTG  
>HPVcand86\_Alpha\_15741127\_nt4081\_Genome\_Tile|1  
GGGTGGATATGATATTGTGTTGTTTGACCGTGGGGATATGAGCATATTGGTTTTGTTATT  
>HPVcand86\_Alpha\_15741127\_nt4101\_Genome\_Tile|1  
TGTTTGACCGTGGGGATATGAGCATATTGGTTTTGTTATTACTATTGATTGCTATTATTT  
>HPVcand86\_Alpha\_15741127\_nt4121\_Genome\_Tile|1  
AGCATATTGGTTTTGTTATTACTATTGATTGCTATTATTTTGCTGTTGTTATTCATACGC  
>HPVcand86\_Alpha\_15741127\_nt4141\_Genome\_Tile|1  
ACTATTGATTGCTATTATTTTGCTGTTGTTATTCATACGCATGTTACATGTGTAGGTGTG  
>HPVcand86\_Alpha\_15741127\_nt4161\_Genome\_Tile|1  
TGCTGTTGTTATTCATACGCATGTTACATGTAGGTGTGTATAGTTTTGTATTTTGTT  
>HPVcand86\_Alpha\_15741127\_nt4761\_Genome\_Tile|1  
GTGACATTACTGGACATGTATTGTCTAGTACTGCCACCTCAGGGACCCACACATATGAAG  
>HPVcand86\_Alpha\_15741127\_nt5241\_Genome\_Tile|1  
AGGATATTGAACTGCAGCCGTTGGGTGCTACCACATCCTCTGGCCAGGCCTCTGGCCAGG  
>HPVcand86\_Alpha\_15741127\_nt5281\_Genome\_Tile|1

TGGCCAGGCCTCTGGCCAGGATACCTTATATGACATTTATGCAGATGATACACACCTATC  
>HPVcand86\_Alpha\_15741127\_nt5301\_Genome\_Tile|1  
ATACCTTATATGACATTTATGCAGATGATACACACCTATCCTCTATATTACAGGAGCCTT  
>HPVcand86\_Alpha\_15741127\_nt5321\_Genome\_Tile|1  
GCAGATGATACACACCTATCCTCTATATTACAGGAGCCTTCCGTTCCCTCATTCGATTCC  
>HPVcand86\_Alpha\_15741127\_nt5341\_Genome\_Tile|1  
CTCTATATTACAGGAGCCTTCCGTTCCCTCATTCGATTCCACCACGCCTGTATCCTCTGC  
>HPVcand86\_Alpha\_15741127\_nt5361\_Genome\_Tile|1  
CCGTTCCCTCATTCGATTCCACCACGCCTGTATCCTCTGCTACAGTGTCGCCACATCTA  
>HPVcand86\_Alpha\_15741127\_nt5401\_Genome\_Tile|1  
TACAGTGTCGCCACATCTATGGTATCTTCCACATATGATAATGTTACTGTTCCCTTATC  
>HPVcand86\_Alpha\_15741127\_nt5421\_Genome\_Tile|1  
TGGTATCTTCCACATATGATAATGTTACTGTTCCCTTATCATCTGCAACCGAGGTTCCCT  
>HPVcand86\_Alpha\_15741127\_nt5441\_Genome\_Tile|1  
AATGTTACTGTTCCCTTATCATCTGCAACCGAGGTTCCCTTATATACTGGTCCTGATATT  
>HPVcand86\_Alpha\_15741127\_nt7161\_Genome\_Tile|1  
ACTAAAAAATAGTGTGTGTGTGCTGTACTGTCTTGTGTGTATGTGTGTCTGTATTGTGTA  
>HPVcand86\_Alpha\_15741127\_nt7181\_Genome\_Tile|1  
TGCTGTACTGTCTTGTGTGTGTGTGTCTGTATTGTGTACTGTTGTTGGTTGCACTGTG  
>HPVcand86\_Alpha\_15741127\_nt7241\_Genome\_Tile|1  
TTGTGTATATGTGTATATGTATGTGTTTTTTGTATGTGTGTGTGTAATGTCCTTTAT  
>HPVcand86\_Alpha\_15741127\_nt7281\_Genome\_Tile|1  
TGTTGTGTAATGTCCTTTATGTGCCCTGTATTGTTGTGCTTTTGTCTTGTGTGTATTT  
>HPVcand86\_Alpha\_15741127\_nt7301\_Genome\_Tile|1  
GTGCCCCGTGATTGTTGTGCTTTTGTCTTGTGTGTTGTTGGTGTGTATGTTTATGG  
>HPVcand86\_Alpha\_15741127\_nt7461\_Genome\_Tile|1  
CTCGGCTACATATCCACCATTTCTGCAGTTATTTTGTACCCGTACTCCATTTTGTATGC  
>HPVcand86\_Alpha\_15741127\_nt7781\_Genome\_Tile|1  
TTGTACTGCCAAGTTTCTGTCTCTATAAACCTTTAAACAACCTTATGTAACCAACACAACCTC  
>HPVcand86\_Alpha\_15741127\_nt7821\_Genome\_Tile|1  
TTATGTAACCAACACAACCTCGGTGCTGTATTATTCATAGTTCCTTCTTTATACTTAACA  
>HPV6\_Alpha\_6002612\_nt0261\_Genome\_Tile|1  
CCTGTTTCGAGGCGGCTATCCATATGCAGCCTGCGCGTGCTGCCTAGAATTTTCATGGAAA  
>HPV6\_Alpha\_6002612\_nt0281\_Genome\_Tile|1  
CATATGCAGCCTGCGCGTGCTGCCTAGAATTTTCATGGAAAAATTAACCAATATAGACACT  
>HPV6\_Alpha\_6002612\_nt0341\_Genome\_Tile|1  
TTGATTATGCTGGATATGCAACAACCTGTTGAAGAAGAACTAAACAAGACATTTTAGACG  
>HPV6\_Alpha\_6002612\_nt0361\_Genome\_Tile|1  
ACAACCTGTTGAAGAAGAACTAAACAAGACATTTTAGACGTGCTAATTCGGTGCTACCTG  
>HPV6\_Alpha\_6002612\_nt0441\_Genome\_Tile|1  
AGTAGAAAAAGGTAAACATATACTAAACCAAGGCACGGTTCATAAAGCTAAATTTGTACGTG  
>HPV6\_Alpha\_6002612\_nt0741\_Genome\_Tile|1  
TGTAACAGAAACAGACATCAGAGAAGTGCAACAGCTTCTGTTGGGAACACTAAACATAGTG  
>HPV6\_Alpha\_6002612\_nt2081\_Genome\_Tile|1  
GAAATGAGGAAGATGTCTATAAAACAATGGATAAAACATAGGGGTTCTAAAATAGAAGGC  
>HPV6\_Alpha\_6002612\_nt2521\_Genome\_Tile|1  
GCTAGTAACATCCAACATAGATATTACCAAAGAAGAGAAATATAAGTATTTACATACTAG  
>HPV6\_Alpha\_6002612\_nt2961\_Genome\_Tile|1  
GAATCATTATTAAAGACTGAGTATAGTATGGAACCGTGGACATTACAAGAAACAAGTTAT  
>HPV6\_Alpha\_6002612\_nt3041\_Genome\_Tile|1  
TAAACGCTGTTTTAAAAAACGGGGCAAACTGTAGAAGTTAAATTTGATGGCTGTGCAAA  
>HPV6\_Alpha\_6002612\_nt3061\_Genome\_Tile|1  
GGGGCAAAACTGTAGAAGTTAAATTTGATGGCTGTGCAACAATACAATGGATTATGTGG  
>HPV6\_Alpha\_6002612\_nt3121\_Genome\_Tile|1  
TATGGACAGATGTGTATGTGCAGGACACTGACTCCTGGGTAAAGGTGCATAGTATGGTAG



>HPV6\_Alpha\_6002612\_nt3481\_Genome\_Tile|1  
TGGCCACATTGGACCCGTGGACAGTGGAAACCACAACGTCATCACTAACAATCACGACC  
>HPV6\_Alpha\_6002612\_nt3741\_Genome\_Tile|1  
GAGGAACAAAGGCAACAGTTTTTTAAATGTTGTAAAAATACCCCCTACTATTAGACACAAA  
>HPV6\_Alpha\_6002612\_nt3761\_Genome\_Tile|1  
TTTAAATGTTGTAAAAATACCCCCTACTATTAGACACAACTGGGGTTTATGTCAATGCA  
>HPV6\_Alpha\_6002612\_nt3781\_Genome\_Tile|1  
CCCCTACTATTAGACACAACTGGGGTTTATGTCAATGCACCTATTGTAATTTGTATATA  
>HPV6\_Alpha\_6002612\_nt3841\_Genome\_Tile|1  
TGTAATGTGTAAATATATGGTATTGGTGTAAATACAACGTGTACATGTATGGAAGTGGTAC  
>HPV6\_Alpha\_6002612\_nt3861\_Genome\_Tile|1  
GTATTGGTGTAAATACAACGTGTACATGTATGGAAGTGGTACCTGTACAAATAGCTGCAGGA  
>HPV6\_Alpha\_6002612\_nt3881\_Genome\_Tile|1  
TACATGTATGGAAGTGGTACCTGTACAAATAGCTGCAGGAACAACCAGCACATTAATACT  
>HPV6\_Alpha\_6002612\_nt3961\_Genome\_Tile|1  
TTGTATGTTTTGTTAGCATCATACTTATTGTATGGATATCTGACTTTATTGTGTACACAT  
>HPV6\_Alpha\_6002612\_nt3981\_Genome\_Tile|1  
ATACTTATTGTATGGATATCTGACTTTATTGTGTACACATCTGTGCTAGTACTAACACTG  
>HPV6\_Alpha\_6002612\_nt4001\_Genome\_Tile|1  
TGACTTTATTGTGTACACATCTGTGCTAGTACTAACACTGCTTTTATACTTACTATTGTG  
>HPV6\_Alpha\_6002612\_nt4061\_Genome\_Tile|1  
GCTGCTATTAACAACCCCCTTGCAATTTTTCTACTAACTTTACTTGTGTGTTACTGTCC  
>HPV6\_Alpha\_6002612\_nt4081\_Genome\_Tile|1  
TGCAATTTTTCTACTAACTTTACTTGTGTGTTACTGTCCCGCTTGTTATATACACCACT  
>HPV6\_Alpha\_6002612\_nt4101\_Genome\_Tile|1  
TTACTTGTGTGTTACTGTCCCGCTTGTTATATACACCACTACATTGTGAACACACAGCAA  
>HPV6\_Alpha\_6002612\_nt4121\_Genome\_Tile|1  
CGCTTGTTATATACACCACTACATTGTGAACACACAGCAATGATGCTAACATGTCAATTT  
>HPV6\_Alpha\_6002612\_nt4141\_Genome\_Tile|1  
ACATTGTGAACACACAGCAATGATGCTAACATGTCAATTTAATGATGGAGATACCTGGCT  
>HPV6\_Alpha\_6002612\_nt4201\_Genome\_Tile|1  
GGGTTTGTGGTTGTTATGTGCCTTTATTGTAGGGGTGTTGGGGTTATTATTAATGCACTA  
>HPV6\_Alpha\_6002612\_nt4221\_Genome\_Tile|1  
CCTTTATTGTAGGGGTGTTGGGGTTATTATTAATGCACTATAGAGCTGTACAAGGCGATA  
>HPV6\_Alpha\_6002612\_nt4261\_Genome\_Tile|1  
TAGAGCTGTACAAGGCGATAAACACACCAAATGTAACAAGTGTAAACAAACACAACGTGTA  
>HPV6\_Alpha\_6002612\_nt4301\_Genome\_Tile|1  
TGTAACAAACACAACGTGAATGATGATTATGTAACATATGCATTATGATACTGCTGGTGAT  
>HPV6\_Alpha\_6002612\_nt4361\_Genome\_Tile|1  
TATATATATATGAATTAGAGTAAAACTTTTTTTATATTTGTAACAGTGTATGCTTTGTAT  
>HPV6\_Alpha\_6002612\_nt4621\_Genome\_Tile|1  
GGGTGCTACTGGCTATGTTCCCTTAGGAACCTCTGCAAAACCTTCTATTACTAGTGGGCC  
>HPV6\_Alpha\_6002612\_nt4741\_Genome\_Tile|1  
TTTAATTGAAGAATCGGCAATCATTAACGCAGGGGCGCCTGAAATTGTGCCCCCTGCACA  
>HPV6\_Alpha\_6002612\_nt4761\_Genome\_Tile|1  
TCATTAACGCAGGGGCGCCTGAAATTGTGCCCCCTGCACACGGTGGGTTACAATTACAT  
>HPV6\_Alpha\_6002612\_nt4801\_Genome\_Tile|1  
CGGTGGGTTTACAATTACATCCTCTGAAACAACTACCCCTGCAATATTGGATGTATCAGT  
>HPV6\_Alpha\_6002612\_nt4821\_Genome\_Tile|1  
CCTCTGAAACAACCTACCCCTGCAATATTGGATGTATCAGTTACTAGTCATACTACTACTA  
>HPV6\_Alpha\_6002612\_nt4841\_Genome\_Tile|1  
GCAATATTGGATGTATCAGTTACTAGTCATACTACTACTAGTATATTTAGAAATCCTGTC  
>HPV6\_Alpha\_6002612\_nt4941\_Genome\_Tile|1  
AGGCTAATGGACATATATTAATTTCTGCACCCACTATAACGTCACACCCCTATAGAGGAAA  
>HPV6\_Alpha\_6002612\_nt4981\_Genome\_Tile|1

GTCACACCCCTATAGAGGAAATTCCTTTAGATACTTTTGTGATATCCTCTAGTGATAGCGG  
>HPV6\_Alpha\_6002612\_nt5341\_Genome\_Tile|1  
CACTCGCAGCGGAAAGCACATAGGGGCCCGCATTTCATTATTTTATGATATTTACCTAT  
>HPV6\_Alpha\_6002612\_nt5481\_Genome\_Tile|1  
TTGAACCTGACATTAACCCTACCCAACACCCTGTTACAAATATATCAGATACATATTTAA  
>HPV6\_Alpha\_6002612\_nt5521\_Genome\_Tile|1  
TATATCAGATACATATTTAACTTCCACACCTAATACAGTTACACAACCGTGGGGTAACAC  
>HPV6\_Alpha\_6002612\_nt6121\_Genome\_Tile|1  
GTGTGGGTGTAAGTGGACATCCTTTTCTAAATAAATATGATGATGTTGAAAATTCAGGGA  
>HPV6\_Alpha\_6002612\_nt6141\_Genome\_Tile|1  
CCTTTTCTAAATAAATATGATGATGTTGAAAATTCAGGGAGTGGTGGTAACCCTGGACAG  
>HPV6\_Alpha\_6002612\_nt6581\_Genome\_Tile|1  
GGAACCTGTGCCTGATACTCTTATAATTAAGGGTAGTGGAATCGAACGTCTGTAGGGAG  
>HPV6\_Alpha\_6002612\_nt6601\_Genome\_Tile|1  
TTATAATTAAGGGTAGTGGAATCGAACGTCTGTAGGGAGTAGTATATATGTTAACACCC  
>HPV6\_Alpha\_6002612\_nt6801\_Genome\_Tile|1  
ATGACATTATGTGCATCCGTAACCTACATCTTCCACATACACCAATTCTGATTATAAAGAG  
>HPV6\_Alpha\_6002612\_nt6821\_Genome\_Tile|1  
AACTACATCTTCCACATACACCAATTCTGATTATAAAGAGTACATGCGTCATGTGGAAGA  
>HPV6\_Alpha\_6002612\_nt7281\_Genome\_Tile|1  
ACCAAAAGGTAATATATGTGTATATGTACTGTTATATATATATGTGTGTATGTACTGTTATG  
>HPV6\_Alpha\_6002612\_nt7481\_Genome\_Tile|1  
GCAATAAAACAATTAACCTACATTATTGTATATCTTGTACACCCTGTGACTCAGTGGCTGT  
>HPV6\_Alpha\_6002612\_nt7521\_Genome\_Tile|1  
CCCTGTGACTCAGTGGCTGTTGCACGCGTTTTGGTTTGCACGCGCCTTACACACATAAGT  
>HPV6\_Alpha\_6002612\_nt7581\_Genome\_Tile|1  
AATATACATGCACAATATATATATTTTTGTGTTCCAATAATATATTTTTATATTTGCAACC  
>HPV6\_Alpha\_6002612\_nt7661\_Genome\_Tile|1  
TACACTTTCCACCAATTTGTTACAACGTGTTGCCTGTTAATCCTATATATTTTGTGCCAG  
>HPV6\_Alpha\_6002612\_nt7761\_Genome\_Tile|1  
ATCCTGCCAACCACACACCTGGCGCCAGGGTGCGGTATTGCCTTACTCATATGTTTTATTG  
>HPV6\_Alpha\_6002612\_nt7781\_Genome\_Tile|1  
GGCGCCAGGGTGCGGTATTGCCTTACTCATATGTTTATTGCCACTGCAATAAACCTGTCT  
>HPV6\_Alpha\_6002612\_nt7801\_Genome\_Tile|1  
CCTTACTCATATGTTTATTGCCACTGCAATAAACCTGTCTTTGTGTTATACTTTTATGCA  
>HPV6\_Alpha\_6002612\_nt7821\_Genome\_Tile|1  
CCACTGCAATAAACCTGTCTTTGTGTTATACTTTTATGCACTGTAGCCAACCTCTTAAAG  
>HPV6\_Alpha\_6002612\_nt7881\_Genome\_Tile|1  
CATTTTTGGCTTGTTAGCAGCACATTTTTTTGCTCTTACTGTTTGGTATACAATAACATAA  
>HPV83\_Alpha\_5059324\_nt1681\_Genome\_Tile|1  
AGAACAGCTATGGGGAATGCCTCAGAAAGTACTTGGGGAGACCCAGAGTGGATTGTGCGA  
>HPV83\_Alpha\_5059324\_nt1701\_Genome\_Tile|1  
CTCAGAAGTACTTGGGGAGACCCAGAGTGGATTGTGCGACAAACAGTAGTAGGACATGC  
>HPV83\_Alpha\_5059324\_nt3021\_Genome\_Tile|1  
ACATATATGTATATACGGAGGAAACAAGGACATGGCACAAAGTGTGCGGGGGTGTGGATT  
>HPV83\_Alpha\_5059324\_nt3041\_Genome\_Tile|1  
GAAACAAGGACATGGCACAAAGTGTGCGGGGGTGTGGATTACGCGGGACTGTATTATGAG  
>HPV83\_Alpha\_5059324\_nt3401\_Genome\_Tile|1  
TCAACCCAGACAGAGACCAAAAGCAGTGGACAGTGGTGCCTACGGACACAGCAGTGAC  
>HPV83\_Alpha\_5059324\_nt3441\_Genome\_Tile|1  
CCTACGGACACAGCAGTGACAGTGTCTGCACAAACGCCACAAAGGGACACAGTGAACCGTT  
>HPV83\_Alpha\_5059324\_nt3641\_Genome\_Tile|1  
GCAGCATTTGTAACCTTATGCTATGCAAGTATAGAGCAACGGGAGCTATTTCTAACCAGG  
>HPV83\_Alpha\_5059324\_nt3661\_Genome\_Tile|1  
CTATGCAAGTATAGAGCAACGGGAGCTATTTCTAACCAGGGTTACAATTCCAAAGGGTAT

>HPV83\_Alpha\_5059324\_nt3681\_Genome\_Tile|1  
GGGAGCTATTTCTAACCAGGGTTACAATTCCAAAGGGTATAAAGGCAATGCAAGGATATA  
>HPV83\_Alpha\_5059324\_nt3721\_Genome\_Tile|1  
AAAGGCAATGCAAGGATATATGTCTATGTGCTTTTAACTGTACATATGTATATATATATA  
>HPV83\_Alpha\_5059324\_nt3741\_Genome\_Tile|1  
TGTCTATGTGCTTTTAACTGTACATATGTATATATATATATATAGTGTGTAATACGGGTATG  
>HPV83\_Alpha\_5059324\_nt3761\_Genome\_Tile|1  
TACATATGTATATATATATATAGTGTGTAATACGGGTATGTAACCAATAGTGTATAAGTG  
>HPV83\_Alpha\_5059324\_nt3781\_Genome\_Tile|1  
TAGTGTGTAATACGGGTATGTAACCAATAGTGTATAAGTGTGTTTGCAAATACCTGAGCC  
>HPV83\_Alpha\_5059324\_nt3801\_Genome\_Tile|1  
TAACCAATAGTGTATAAGTGTGTTTGCAAATACCTGAGCCACTATACACCACACCATATA  
>HPV83\_Alpha\_5059324\_nt3821\_Genome\_Tile|1  
TGTTTGCAAATACCTGAGCCACTATACACCACACCATATACCAGTACAACCCTGGATTAC  
>HPV83\_Alpha\_5059324\_nt3861\_Genome\_Tile|1  
CCAGTACAACCCTGGATTACATATTGTGCTTGATTTGTTTGTGGTGTCAATTTCTTGTGC  
>HPV83\_Alpha\_5059324\_nt3961\_Genome\_Tile|1  
GGCATTGTGTGTTTATGTGTATATTGTATTTGGGGTTGTTATTGCTATATGTACAAGT  
>HPV83\_Alpha\_5059324\_nt3981\_Genome\_Tile|1  
GTATATTGTATTTGGGGTTGTTATTGCTATATGTACAAGTATTGTGGTGTATAGGGTTTA  
>HPV83\_Alpha\_5059324\_nt4101\_Genome\_Tile|1  
GTACAATCACTATGTATCCATTGGAGGCTAGAGGTGGGGGGCAGGCATATGATTTAATTG  
>HPV83\_Alpha\_5059324\_nt4141\_Genome\_Tile|1  
GCAGGCATATGATTTAATTGTTATTGGCCGGGACGAAGTGGGATTACTGCTTATTATTTT  
>HPV83\_Alpha\_5059324\_nt4161\_Genome\_Tile|1  
TTATTGGCCGGGACGAAGTGGGATTACTGCTTATTATTTTAATTCTCATCGTAATTATTA  
>HPV83\_Alpha\_5059324\_nt4181\_Genome\_Tile|1  
GGATTACTGCTTATTATTTTAATTCTCATCGTAATTATTATTATTTTGTGTACATGCGG  
>HPV83\_Alpha\_5059324\_nt4201\_Genome\_Tile|1  
AATTCTCATCGTAATTATTATTATTTTGTGTACATGCGGCTACTACATATGTAACCACC  
>HPV83\_Alpha\_5059324\_nt4221\_Genome\_Tile|1  
TTATTTTGTGTACATGCGGCTACTACATATGTAACCACCTCCCCCTTCTGTATACCACA  
>HPV83\_Alpha\_5059324\_nt4261\_Genome\_Tile|1  
TCCCCCTTCTGTATACCACATGTAGGGTATTGTTTTGTACTGTTTGTTTTTTACTTTCTT  
>HPV83\_Alpha\_5059324\_nt4321\_Genome\_Tile|1  
ATTGGCAATAAACATAGTTATATATACAATGTCCCATGTGCATAGGCGGCGCAAAGGGC  
>HPV83\_Alpha\_5059324\_nt4421\_Genome\_Tile|1  
ACATGCCCCCTGATATAGTCCCTAAATTTGAAGGTGACACATGGGCCGATAGGTTTTTA  
>HPV83\_Alpha\_5059324\_nt4721\_Genome\_Tile|1  
ACACATGGCTTTGAGGTTACTAGTTCCCTCCACTACAACCCCCGAGTATTGGATATAACG  
>HPV83\_Alpha\_5059324\_nt4741\_Genome\_Tile|1  
TAGTTCTCCACTACAACCCCCGAGTATTGGATATAACGCCGTCCGCCACGGTACA  
>HPV83\_Alpha\_5059324\_nt5321\_Genome\_Tile|1  
CATGATATTAGCCCCATTCGCCCCACGGAGTCCATTGAGCTACAGCCCTTGAACCCTCC  
>HPV83\_Alpha\_5059324\_nt5341\_Genome\_Tile|1  
GCCCACGGAGTCCATTGAGCTACAGCCCTTGAACCCTCCGTGGCAAACACCTCCTTATA  
>HPV83\_Alpha\_5059324\_nt5401\_Genome\_Tile|1  
TGACATATATGCAGATGATGTTTTTTGGAGTCCCTCGGTGCCCTGCGGCCATCCCCCTC  
>HPV83\_Alpha\_5059324\_nt5441\_Genome\_Tile|1  
CCCCTGCGGCCATCCCCCTCATCCACCTCTGTGTCCTTGACGTCCACTAATGTTTCTGCT  
>HPV83\_Alpha\_5059324\_nt5461\_Genome\_Tile|1  
ATCCACCTCTGTGTCCTTGACGTCCACTAATGTTTCTGCTACCTCTGCTGTGACTGCACA  
>HPV83\_Alpha\_5059324\_nt5561\_Genome\_Tile|1  
GTACCTGCCCTTTCAGGCCCTGACATACACGGTGCTGCTCATATGCCTGCAGACCCTTCT  
>HPV83\_Alpha\_5059324\_nt5581\_Genome\_Tile|1

TGACATACACGGTGCTGCTCATATGCCTGCAGACCCTTCTGTTCCCTGTGCCATCTAATAT  
>HPV83\_Alpha\_5059324\_nt5601\_Genome\_Tile|1  
ATATGCCTGCAGACCCTTCTGTTCCCTGTGCCATCTAATATTCCTATTCAGTCTGTGTTTA  
>HPV83\_Alpha\_5059324\_nt5641\_Genome\_Tile|1  
TCCTATTCAGTCTGTGTTTATAGACGGTACTGACTATTATTTATTGCCTAACTACATTTT  
>HPV83\_Alpha\_5059324\_nt6161\_Genome\_Tile|1  
CACAGATAGGCGTGACAATGTCTCAGTGGATTACAAACAAACGCAGCTTATTATCATTGG  
>HPV83\_Alpha\_5059324\_nt6541\_Genome\_Tile|1  
TGGGCGAGGTGCTGCCTACCTCTTATTATATTCAGGCACATCTGCTAATAGTAGGAACA  
>HPV83\_Alpha\_5059324\_nt6561\_Genome\_Tile|1  
TCTTATTATATTCAGGCACATCTGCTAATAGTAGGAACACTCTTACCAGCTACATCTAT  
>HPV83\_Alpha\_5059324\_nt6581\_Genome\_Tile|1  
ATCTGCTAATAGTAGGAACACTCTTACCAGCTACATCTATGCTCCTACTCCTAGTGGCTC  
>HPV83\_Alpha\_5059324\_nt6841\_Genome\_Tile|1  
ACACAGAGGAATATGACTTACAGGTTATATTGCAACTTTGCAAAATACATCTGACCCCTG  
>HPV83\_Alpha\_5059324\_nt7281\_Genome\_Tile|1  
ATCTGTGTTTGTGCAGTGTTATGCCTATATGCGGTGGTATGCCTTTGTGTTATGTATGTG  
>HPV83\_Alpha\_5059324\_nt7301\_Genome\_Tile|1  
ATGCCTATATGCGGTGGTATGCCTTTGTGTTATGTATGTGGCAGTACCGTTGTATGTGTT  
>HPV83\_Alpha\_5059324\_nt7321\_Genome\_Tile|1  
GCCTTTGTGTTATGTATGTGGCAGTACCGTTGTATGTGTTTGTGTATTATATGTTTGTGC  
>HPV83\_Alpha\_5059324\_nt7341\_Genome\_Tile|1  
GCAGTACCGTTGTATGTGTTTGTGTATTATATGTTTGTGCATGTATCTGTGTTTTGTCTG  
>HPV83\_Alpha\_5059324\_nt7361\_Genome\_Tile|1  
TGTGTATTATATGTTTGTGCATGTATCTGTGTTTTGTCTGTGTAGTATGTGTATGTATCT  
>HPV83\_Alpha\_5059324\_nt7401\_Genome\_Tile|1  
TGTAGTATGTGTATGTATCTGTGTGTTTTGTATGTGTATACATTGTGGAATGTATGTGTT  
>HPV83\_Alpha\_5059324\_nt7561\_Genome\_Tile|1  
TGGCACCTATGTCCTGCACCACCCTATAGTTCCCTGACCCGTTAGGTTACTAGTTCCTTTT  
>HPV83\_Alpha\_5059324\_nt7681\_Genome\_Tile|1  
TTACACACAATGGTAAGTAATCCCTTATTAACCTCATATCCTGCATACTTCTGTGCCAAC  
>HPV83\_Alpha\_5059324\_nt7761\_Genome\_Tile|1  
TGACAGTTTGTGTTGGCTGCACAATATGATTTTTTGTACAGGCTTATATTGTACTTGTACTTC  
>HPV83\_Alpha\_5059324\_nt7881\_Genome\_Tile|1  
TTTTGGACATGTAGACTATTGCAGTAGCCAACCTATGTGTCTATCCAGTAATCCTGCAGTT  
>HPV84\_Alpha\_12958167\_nt0021\_Genome\_Tile|1  
CCCCACCAATATTTTTGTGCTGTGCCAGGAATACGAGGTGGAGTTTCGACGACCTACGATT  
>HPV84\_Alpha\_12958167\_nt0441\_Genome\_Tile|1  
ACGTAAAGGATATTATTTTAAACAGATATACCAGATGTAGTTAGTTTATACTGTGACGAG  
>HPV84\_Alpha\_12958167\_nt1321\_Genome\_Tile|1  
GTAAAACTATTAGGAAAATTTAAGGAACCTATTTGGGCTGTCCTTTATGGATCTGGTAAGA  
>HPV84\_Alpha\_12958167\_nt1541\_Genome\_Tile|1  
TACTGCGCTTTAAGTGTAAACAAAAGCAGGGAAACAGTAGCGCACTGTATAGGTGGCATT  
>HPV84\_Alpha\_12958167\_nt1561\_Genome\_Tile|1  
AAAAGCAGGGAAACAGTAGCGCACTGTATAGGTGGCATTTTAAATGTACCCGAAAAACGT  
>HPV84\_Alpha\_12958167\_nt2361\_Genome\_Tile|1  
TAAAAACCTAGTACAGTTAAATGTCTCCGTTACTAATAACAACAAACATAAATCCAGA  
>HPV84\_Alpha\_12958167\_nt2421\_Genome\_Tile|1  
AACTGATGACACATTTAAATACTTACGCAGCCGAATGGTTATTTTCCCTTTTAAACAA  
>HPV84\_Alpha\_12958167\_nt3001\_Genome\_Tile|1  
TGTAAGTGGGGTTTATATATGTACATTGTGCCAGTGAGGACACCTGGTATAAGGTACC  
>HPV84\_Alpha\_12958167\_nt3021\_Genome\_Tile|1  
ATGTACATTGTGCCAGTGAGGACACCTGGTATAAGGTACCTGGACAGATTAGCAACAGAG  
>HPV84\_Alpha\_12958167\_nt3041\_Genome\_Tile|1  
GACACCTGGTATAAGGTACCTGGACAGATTAGCAACAGAGGGCTGTATTATGAACTGCAA

>HPV84\_Alpha\_12958167\_nt3361\_Genome\_Tile|1  
ACTCGGAGGGGACACAGTTCAGCAGCCCCGACTCTACACAAGGACACCGGCCGGTTGACAG  
>HPV84\_Alpha\_12958167\_nt3401\_Genome\_Tile|1  
GGACACCGGCCGGTTGACAGTTGCAGCACAAGGACAAACAATAACTGTGACAGCCCCAAA  
>HPV84\_Alpha\_12958167\_nt3461\_Genome\_Tile|1  
CGGCCACGGGAACACAGTAACTGTGACAGTGCACCTGTCCTACACCTAAAAGGTCAATCC  
>HPV84\_Alpha\_12958167\_nt3521\_Genome\_Tile|1  
AATAGCCTTAAGTGCTTTTCGATATAGGTTACACCAGTCGGTGCCTGACCTGTTTGAAAGG  
>HPV84\_Alpha\_12958167\_nt3621\_Genome\_Tile|1  
ACAAAACATCATATGTAACACTATGGTATAAAAGTACGGACCAACGCAACAGCTCTTGG  
>HPV84\_Alpha\_12958167\_nt3681\_Genome\_Tile|1  
CACGTGTACATATACCAAAAGGCATTGTAGCCACACTTGGTAGTATGTCTATGGTTATGT  
>HPV84\_Alpha\_12958167\_nt3721\_Genome\_Tile|1  
TAGTATGTCTATGGTTATGTAAACAGTACCCATTGTATATGTATAGTGTAATGCTGTAT  
>HPV84\_Alpha\_12958167\_nt3761\_Genome\_Tile|1  
GTATAGTGTAATGCTGTATTACTGAGCCATTTGTAACAATTGTGTATGTCCTACATACC  
>HPV84\_Alpha\_12958167\_nt4041\_Genome\_Tile|1  
ACATATCCCTGTACAGTCCCGGTCCTACCTATTATGTATCCCATGCAATTACGGGGTCCC  
>HPV84\_Alpha\_12958167\_nt4101\_Genome\_Tile|1  
CAGGGTGGGTATGACATAGTGGTGTGGAGCGTGGTGATGTAGGTCTTTTTTACTATTATT  
>HPV84\_Alpha\_12958167\_nt4121\_Genome\_Tile|1  
GGTGTGTTGAGCGTGGTGATGTAGGTCTTTTTTACTATTATTTTGCTTTTAATTGTTATTAT  
>HPV84\_Alpha\_12958167\_nt4141\_Genome\_Tile|1  
TAGGTCTTTTTTACTATTATTTTGTCTTTTAATTGTTATTATTTTACTTTGGCTGTGCCACC  
>HPV84\_Alpha\_12958167\_nt4161\_Genome\_Tile|1  
TTGCTTTTAATTGTTATTATTTTACTTTGGCTGTGCCACCGTGTATGCAGTTTTTAAAGT  
>HPV84\_Alpha\_12958167\_nt4181\_Genome\_Tile|1  
TTTACTTTGGCTGTGCCACCGTGTATGCAGTTTTTAAAGTGCTTTTGTATTTTGTACAT  
>HPV84\_Alpha\_12958167\_nt4201\_Genome\_Tile|1  
GTGTTATGCAGTTTTTAAAGTGCTTTTGTATTTTGTACATACTATAATAAACACTTGGTA  
>HPV84\_Alpha\_12958167\_nt4221\_Genome\_Tile|1  
GCTTTTGTATTTTGTACATACTATAATAAACACTTGGTACCATGCCCCAAGGTTCTTAAA  
>HPV84\_Alpha\_12958167\_nt4781\_Genome\_Tile|1  
AGGGGACATTACTGGTCATGTGTGTCTAGTACAGCCACGTCCGGGTCACATACCTACGA  
>HPV84\_Alpha\_12958167\_nt4801\_Genome\_Tile|1  
TGTTGTCTAGTACAGCCACGTCCGGGTCACATACCTACGAAGAAATCCCCATGCAAACCT  
>HPV84\_Alpha\_12958167\_nt5241\_Genome\_Tile|1  
CTTAGCCCTATACCACATCTTGAGGATATTGAGCTGCAGCCCCTGGTATCATCCTCTGCT  
>HPV84\_Alpha\_12958167\_nt5261\_Genome\_Tile|1  
TGAGGATATTGAGCTGCAGCCCCTGGTATCATCCTCTGCTGTGCCTACGGATTCAATTATA  
>HPV84\_Alpha\_12958167\_nt5321\_Genome\_Tile|1  
TGATATATATGCAGATGATGCCATTTGTCTCTGTATTGCGTCCCCCTCCGTTTCTGC  
>HPV84\_Alpha\_12958167\_nt5401\_Genome\_Tile|1  
TTGCCTCTGCAGACCTTTCTGCCACCTCCATAACCGCCTCCACATATGATAATGTCACTG  
>HPV84\_Alpha\_12958167\_nt5441\_Genome\_Tile|1  
CACATATGATAATGTCACTGTCCCGTTGTTTCTGGCACCGATGTGCCCCGTCTATACAGG  
>HPV84\_Alpha\_12958167\_nt5461\_Genome\_Tile|1  
TCCCGTTGTTTCTGGCACCGATGTGCCCGTCTATACAGGCCCTGATATTGACCATTCTG  
>HPV84\_Alpha\_12958167\_nt5481\_Genome\_Tile|1  
GATGTGCCCGTCTATACAGGCCCTGATATTGACCATTCTGCTGCCCTCCGCACCTCCC  
>HPV84\_Alpha\_12958167\_nt6701\_Genome\_Tile|1  
CTATTAGTGCTGCTACCAACACCGAATCAGAATATAAACCTACCAATTTTAAGGAATACC  
>HPV84\_Alpha\_12958167\_nt7141\_Genome\_Tile|1  
CCCCCTGCCCTCCAAACGGCGTAAGGCCAAAAAGTAATATGTGTCTGTTTGGTGTCT  
>HPV84\_Alpha\_12958167\_nt7161\_Genome\_Tile|1

TAGAGGCCAAAGTAATGATATGTTGGTTGGTGTCTGTGTTGTTGGTGTCT  
>HPV84\_Alpha\_12958167\_nt7241\_Genome\_Tile|1  
CATTTTGTATGTGTTTTGTACTGTTCTGTATGTGCCCTGTTATGTATAATGTGTATGTAT  
>HPV84\_Alpha\_12958167\_nt7261\_Genome\_Tile|1  
CTGTTCTGTATGTGCCCTGTTATGTATAATGTGTATGTATTTATGGAATGCGTGCCCTG  
>HPV84\_Alpha\_12958167\_nt7301\_Genome\_Tile|1  
TTATGGAATGCGTGCCCTGTATGTTGTGTATGTTGTGTACATGTATTTGTGGAATGTGT  
>HPV84\_Alpha\_12958167\_nt7421\_Genome\_Tile|1  
TGAGTAAGTGTGCACCATGTACACGCCTGGGTAGGTCTACTGTTTCCTTTAAGGGTATAA  
>HPV84\_Alpha\_12958167\_nt7441\_Genome\_Tile|1  
ACACGCCTGGGTAGGTCTACTGTTTCCTTTAAGGGTATAAAGCCTCCATTTTGTATGCAA  
>HPV84\_Alpha\_12958167\_nt7581\_Genome\_Tile|1  
TGCGTAGGCAGCTGCAGACGTCCGCACCCAGGTGTGTCTGTCTAGCTATTTCAATATGCTA  
>HPV84\_Alpha\_12958167\_nt7621\_Genome\_Tile|1  
TCAGCTATTTCAATATGCTAATAAATGTATTGTCTACAGTTTATAGGTTTACTTACTCAT  
>HPV84\_Alpha\_12958167\_nt7801\_Genome\_Tile|1  
GTAACACACCCGTTTCGGTTGCTATGTTATTTCATACTATTTTCTTATACTTTACAACAAT  
>HPV84\_Alpha\_12958167\_nt7821\_Genome\_Tile|1  
GCTATGTTATTTCATACTATTTTCTTATACTTTACAACAATGATACAGTAAAAAAATAGGG  
>HPV39\_Alpha\_333245\_nt1181\_Genome\_Tile|1  
TAAACGAAAGTATACAGACAGCAGTGGCGACACTAGACCGTATGGAAAAAAGTAGGCA  
>HPV39\_Alpha\_333245\_nt1221\_Genome\_Tile|1  
GTATGGAAAAAAGTAGGCAGGAATACCAGGGGAACACTACAGGAAATTTTCATTAAATGT  
>HPV39\_Alpha\_333245\_nt1461\_Genome\_Tile|1  
TAGTGAAAACCAGGATCCCAAATCTCCAACGCACAAATTAAATTATTGTTACAATCCAA  
>HPV39\_Alpha\_333245\_nt1481\_Genome\_Tile|1  
AATCTCCAACCTGCACAAATTAAATTATTGTTACAATCCAATAACAAAAGGCTGCAATGC  
>HPV39\_Alpha\_333245\_nt1501\_Genome\_Tile|1  
AAATTATTGTTACAATCCAATAACAAAAGGCTGCAATGCTAACACAATTTAAAGAAACA  
>HPV39\_Alpha\_333245\_nt1681\_Genome\_Tile|1  
ATCAACAAATATGCCTTATATACACATATACAAAGCTTAGACACAAAACAAGGAGTACTA  
>HPV39\_Alpha\_333245\_nt3181\_Genome\_Tile|1  
GGACAAATGTAATGCTATGAACTATGTATTATGGGGTGCTATATATTATAAAAAATAATAT  
>HPV39\_Alpha\_333245\_nt3281\_Genome\_Tile|1  
GGTATATATTATATGAACGAGCACCTAAAAGTATACTATGAAGTGTTTATTCAAGATGCG  
>HPV39\_Alpha\_333245\_nt3301\_Genome\_Tile|1  
GCACCTAAAAGTATACTATGAAGTGTTTATTCAAGATGCGGAAAGGTATGGGACTAGTGG  
>HPV39\_Alpha\_333245\_nt3581\_Genome\_Tile|1  
GGAGTGTCCCTGGACCATCTTAACAACCCACTCCACAGTAACAGTACAGGCCACAACACA  
>HPV39\_Alpha\_333245\_nt3781\_Genome\_Tile|1  
GGGTAAGGGAACCAAAAACGCTGGCATATTAAGTGTACATATGCCACAGAGTCACAACG  
>HPV39\_Alpha\_333245\_nt3861\_Genome\_Tile|1  
TTAAAATACCTTCTAGTGTACATGTTTCATTGGGTACATGACATTGTAAAGTATACTAT  
>HPV39\_Alpha\_333245\_nt3881\_Genome\_Tile|1  
CATGTTTCATTGGGTTACATGACATTGTAAAGTATACTATGGATATTGTGTATGTATATT  
>HPV39\_Alpha\_333245\_nt4121\_Genome\_Tile|1  
TATTTTTTGTATTGCCCATGTGGTTGTTGCATAGACTGGCAATGGATATGATATAGTACT  
>HPV39\_Alpha\_333245\_nt4181\_Genome\_Tile|1  
GTATATGTATGTGCATTGTGCATAACTACTGTACATAGCTTTTTTATATTTTTTTTTGTTA  
>HPV39\_Alpha\_333245\_nt4321\_Genome\_Tile|1  
GGGTACCTGTCCACCAGACGTTGTTGATAAAGTTGAGGGTACTACACTTGCTGACAAAAT  
>HPV39\_Alpha\_333245\_nt4681\_Genome\_Tile|1  
ACCCTCCTCTGGGTCTGTACAAATAACCTCTACTAGTTATACTAACCCTGCCTTTACGGA  
>HPV39\_Alpha\_333245\_nt4701\_Genome\_Tile|1  
AAATAACCTCTACTAGTTATACTAACCCTGCCTTTACGGATCCTTCCTTAATTGAGGTTT

>HPV39\_Alpha\_333245\_nt5201\_Genome\_Tile|1  
CATTATTACCATGACATTAGTAGTATTGCTCCTGCTGAAAGCATTGAATTACAGCCCCCTA  
>HPV39\_Alpha\_333245\_nt5241\_Genome\_Tile|1  
GCATTGAATTACAGCCCCTAGTTCACGCTGAGCCCTCTGATGCTTCAGATGCATTATTTG  
>HPV39\_Alpha\_333245\_nt5301\_Genome\_Tile|1  
ATATATATGCTGATGTGGACAATAACACATATTTAGATACTGCATTTAATAATAACAAGGG  
>HPV39\_Alpha\_333245\_nt5321\_Genome\_Tile|1  
AATAACACATATTTAGATACTGCATTTAATAATAACAAGGGATTTCGGGCACTACATATAAC  
>HPV39\_Alpha\_333245\_nt5341\_Genome\_Tile|1  
TGCATTTAATAATAACAAGGGATTTCGGGCACTACATATAACACAGGCTCACTACCTTCTGT  
>HPV39\_Alpha\_333245\_nt5361\_Genome\_Tile|1  
ATTCGGGCACTACATATAACACAGGCTCACTACCTTCTGTGGCTTCTTCAGCATCTACTA  
>HPV39\_Alpha\_333245\_nt5381\_Genome\_Tile|1  
ACAGGCTCACTACCTTCTGTGGCTTCTTCAGCATCTACTAAATATGCCAATACAACCTATT  
>HPV39\_Alpha\_333245\_nt5481\_Genome\_Tile|1  
CTGATATTGCTTTACCAAGTACTACTCCACAGTTGCCATTGGTGCCTTCTGGACCAATAG  
>HPV39\_Alpha\_333245\_nt5501\_Genome\_Tile|1  
ACTACTCCACAGTTGCCATTGGTGCCTTCTGGACCAATAGACACAACATATGCAATAACC  
>HPV39\_Alpha\_333245\_nt5521\_Genome\_Tile|1  
GGTGCCTTCTGGACCAATAGACACAACATATGCAATAACCATTTCAGGGTTCCAATTATTA  
>HPV39\_Alpha\_333245\_nt6461\_Genome\_Tile|1  
ATTGTATATTAAGGGCACAGATATACGTGCAAACCCCGGTAGTTCTGTATACTGCCCCCTC  
>HPV39\_Alpha\_333245\_nt6481\_Genome\_Tile|1  
ATATACGTGCAAACCCCGGTAGTTCTGTATACTGCCCCCTCTCCCAGCGGTTCCATGGTAA  
>HPV39\_Alpha\_333245\_nt6501\_Genome\_Tile|1  
AGTTCTGTATACTGCCCCCTCTCCCAGCGGTTCCATGGTAACCTCTGATTCCCAGTTATTT  
>HPV39\_Alpha\_333245\_nt6621\_Genome\_Tile|1  
CAATTATTTCTTACTGTTGTGGACACTACCCGTAGTACCAACTTTACATTATCTACCTCT  
>HPV39\_Alpha\_333245\_nt6641\_Genome\_Tile|1  
GGACACTACCCGTAGTACCAACTTTACATTATCTACCTCTATAGAGTCTTCCATACCTTC  
>HPV39\_Alpha\_333245\_nt6661\_Genome\_Tile|1  
ACTTTACATTATCTACCTCTATAGAGTCTTCCATACCTTCTACATATGATCCTTCTAAGT  
>HPV39\_Alpha\_333245\_nt6681\_Genome\_Tile|1  
ATAGAGTCTTCCATACCTTCTACATATGATCCTTCTAAGTTTAAGGAATATACCAGGCAC  
>HPV39\_Alpha\_333245\_nt6841\_Genome\_Tile|1  
ACAATTGGAATTTTGCTGTAGCTCCTCCACCATCTGCCAGTTTGGTAGACACTTACAGAT  
>HPV39\_Alpha\_333245\_nt7061\_Genome\_Tile|1  
GGTCCGCAGGCGCCCTACTATAGGTCCCCGAAAGCGGCCTGCTGCATCCACTTCCTCGTC  
>HPV39\_Alpha\_333245\_nt7081\_Genome\_Tile|1  
TAGGTCCCCGAAAGCGGCCTGCTGCATCCACTTCCTCGTCTCAGCTACTAAACACAAAC  
>HPV39\_Alpha\_333245\_nt7141\_Genome\_Tile|1  
GTAAACGTGTGCTAAATAATGCATGTGTATGCCTTGTTATGTGTGTGTATGTTGTTTGT  
>HPV39\_Alpha\_333245\_nt7161\_Genome\_Tile|1  
TGCATGTGTATGCCTTGTTATGTGTGTGTATGTTGTTTGTTCCTTATGTGTTGAGTGTA  
>HPV39\_Alpha\_333245\_nt7281\_Genome\_Tile|1  
TTCATGTGTGATTGCACACCCTGTGACTAACAGTGTATTTGTTTTACATATAATAGGTCT  
>HPV39\_Alpha\_333245\_nt7381\_Genome\_Tile|1  
GTGTTTACTACCTAATATGTAATTTTTACATTGTTGTATGCGTTTCTACATTTTATACTT  
>HPV39\_Alpha\_333245\_nt7721\_Genome\_Tile|1  
ACTACTTTTTGATTTCAGGAATGTGTCTTACAGTATAAGTTATACAAGTGACTAATGTAGC  
>HPV82\_Alpha\_6970427\_nt0061\_Genome\_Tile|1  
GGTGCATATAAAAAGCAAGCACGAAAAATACATAAGAACACCATGTTTGAAGACATAAGAG  
>HPV82\_Alpha\_6970427\_nt0281\_Genome\_Tile|1  
TGCAGCATGCAAAAAATGCCTAATGTTTTATTCTAGAATTAGAGAATACAGAAGGTATAG  
>HPV82\_Alpha\_6970427\_nt0501\_Genome\_Tile|1

GGACAGTGTGCAAATTGCAGAAAACCAACGACGACGAGTGTGAAACCCAGGTGTAATAA  
>HPV82\_Alpha\_6970427\_nt0941\_Genome\_Tile|1  
AGTTGACAAAAAACGGGAGATAATATATCAGACGATGAGGAGGAAGATACAAATGATAC  
>HPV82\_Alpha\_6970427\_nt0961\_Genome\_Tile|1  
ATAATATATCAGACGATGAGGAGGAAGATACAAATGATACAGGGTCTGATATAATAGATT  
>HPV82\_Alpha\_6970427\_nt0981\_Genome\_Tile|1  
GAGGAAGATACAAATGATACAGGGTCTGATATAATAGATTTTATAGATACAAGTAATAGT  
>HPV82\_Alpha\_6970427\_nt1341\_Genome\_Tile|1  
CAACATAGTATGTGTAGTGGCGGGGGAGCAGCGACAGAAGTACAGAGATAGACCTGGAA  
>HPV82\_Alpha\_6970427\_nt1361\_Genome\_Tile|1  
CGGGGGGAGCAGCGACAGAAGTACAGAGATAGACCTGGAAACAAACGAAAAATGCTACCAA  
>HPV82\_Alpha\_6970427\_nt1381\_Genome\_Tile|1  
GTACAGAGATAGACCTGGAAACAAACGAAAAATGCTACCAATGTAGGACTAAACAGTATAT  
>HPV82\_Alpha\_6970427\_nt1401\_Genome\_Tile|1  
ACAAACGAAAAATGCTACCAATGTAGGACTAAACAGTATATGTGCAGTGTTAAATGTAGC  
>HPV82\_Alpha\_6970427\_nt1641\_Genome\_Tile|1  
TACCATATACAATGCCTATCATGTGATTGGGGTACTATTGTGCTACTGTTAGCTAGATTT  
>HPV82\_Alpha\_6970427\_nt1661\_Genome\_Tile|1  
ATGTGATTGGGGTACTATTGTGCTACTGTTAGCTAGATTTAGCTATGTGCCAAAAACAGACT  
>HPV82\_Alpha\_6970427\_nt1681\_Genome\_Tile|1  
TGCTACTGTTAGCTAGATTTACATGTGCCAAAAACAGACTTACCATTGCCAAATGTTTAG  
>HPV82\_Alpha\_6970427\_nt2181\_Genome\_Tile|1  
ATAGCTAAATTTTTCGATACACAGGGTATTAACCTTTATGTATTTTATACAAACATTTAAA  
>HPV82\_Alpha\_6970427\_nt2421\_Genome\_Tile|1  
GATGATGCCACATATGGCTGTTGGACATATATAGACCAGTACCTAAGAAATTTCTCTAAAT  
>HPV82\_Alpha\_6970427\_nt2521\_Genome\_Tile|1  
TGCAAATTGTATGCCACCATTGCTTATTACCTCAAATATCAATCCAAAAAGAAGATCCAA  
>HPV82\_Alpha\_6970427\_nt2861\_Genome\_Tile|1  
AATGTGCTATGTTTTATACTGCACGAGAAAGAAACATGCAAACCTTAACCATCAAGTAG  
>HPV82\_Alpha\_6970427\_nt2881\_Genome\_Tile|1  
GCACGAGAAAGAAACATGCAAACCTTAACCATCAAGTAGTACCAGCATCGGCAGTATCA  
>HPV82\_Alpha\_6970427\_nt3181\_Genome\_Tile|1  
GTAAAAACACAGGGAACGTGGACTATACAGGTATTTATTACAAACCAGATGTAAACAAA  
>HPV82\_Alpha\_6970427\_nt3201\_Genome\_Tile|1  
GGACTATACAGGTATTTATTACAAACCAGATGTAAACAAAGAATATTATGTAACATTTAA  
>HPV82\_Alpha\_6970427\_nt3221\_Genome\_Tile|1  
ACAAACCAGATGTAAACAAAGAATATTATGTAACATTTAAAGATGAAGCAAAAAAATATG  
>HPV82\_Alpha\_6970427\_nt3401\_Genome\_Tile|1  
CCACGACCAATACCTATTCGCTCCGCGGGCACCACAGAAGCCCAGACACCACAACAAC  
>HPV82\_Alpha\_6970427\_nt3721\_Genome\_Tile|1  
ATTGTTACAATTACATTTGACAGTGCACACCAACGTCAAAGTTTATTGATACTGTTAAA  
>HPV82\_Alpha\_6970427\_nt3861\_Genome\_Tile|1  
ATATGTGCTGCTAAGTGTATATAGTTACTCGCAACCATTGCGGTGTTTTTGGTGTGTTTA  
>HPV82\_Alpha\_6970427\_nt4041\_Genome\_Tile|1  
TCACCTTTAACTACATTTACTGTATACTTGATTTGTTTTTATATTCCATGCTTTTTATTA  
>HPV82\_Alpha\_6970427\_nt4061\_Genome\_Tile|1  
TGTATACTTGATTTGTTTTTATATTCCATGCTTTTTTATTACATTTATATACCTTTTCTAT  
>HPV82\_Alpha\_6970427\_nt4101\_Genome\_Tile|1  
CATTTATATACCTTTTCTATTTTGCAACTTACACAATAAAACTTTGTATGTTTTTGTATT  
>HPV82\_Alpha\_6970427\_nt4121\_Genome\_Tile|1  
TTTGCAACTTACACAATAAAACTTTGTATGTTTTTGTATTATATACAATGGTGGCTGCAC  
>HPV82\_Alpha\_6970427\_nt4561\_Genome\_Tile|1  
ACTTCCTCTTCTACAACAACCTCCTGCGGTTTTAGACATTACACCTTCCGCTGGTACAGTA  
>HPV82\_Alpha\_6970427\_nt4801\_Genome\_Tile|1  
ATTAGCAGTACACCCACCCCTGGGGTGCGCCGCATTGCTGCACCTCGTTTATATAGCAGG



>HPV82\_Alpha\_6970427\_nt4841\_Genome\_Tile|1  
CACCTCGTTTATATAGCAGGGCATTTCACAGGTTAAGGTTACTAATCCAGACTTTATTA  
>HPV82\_Alpha\_6970427\_nt4921\_Genome\_Tile|1  
ACTTTTGATAATCCTGCTTTTGAACCTGCTGATACATCATTGTCCTTTGAGGAACCTACT  
>HPV82\_Alpha\_6970427\_nt5261\_Genome\_Tile|1  
AGCCTACACAAACCACACCTATGCTTCGCTCTCCATTTTCTCCTTTGTCTACACAACCTAC  
>HPV82\_Alpha\_6970427\_nt5281\_Genome\_Tile|1  
ATGCTTCGCTCTCCATTTTCTCCTTTGTCTACACAACCTACCTTCATTGTCTTCCTCTGTT  
>HPV82\_Alpha\_6970427\_nt5301\_Genome\_Tile|1  
TCCTTTGTCTACACAACCTACCTTCATTGTCTTCCTCTGTTTCTTCATCTTATGCTAATGT  
>HPV82\_Alpha\_6970427\_nt5321\_Genome\_Tile|1  
CTTCATTGTCTTCCTCTGTTTCTTCATCTTATGCTAATGTTACTATCCCTTTTCTACCA  
>HPV82\_Alpha\_6970427\_nt5361\_Genome\_Tile|1  
TACTATCCCTTTTCTACCACATATAATGTTCCCTATTCATACGGGTCCTGATGTTGTGTT  
>HPV82\_Alpha\_6970427\_nt5421\_Genome\_Tile|1  
ACCTACTTCACCCACTGTGTGGCCCTTTATTCACACACATCTATTGACACACAACATGC  
>HPV82\_Alpha\_6970427\_nt5461\_Genome\_Tile|1  
TCTATTGACACACAACATGCTATTGTTATACAAGGTGGGGATTACTACTTTGTGGCCGTA  
>HPV82\_Alpha\_6970427\_nt7041\_Genome\_Tile|1  
TCCGCTTCCTCGTCTGCCAAACGTAAAGGGTTAAAAAATAGGTTCCGCCCTGCCTATGTA  
>HPV82\_Alpha\_6970427\_nt7361\_Genome\_Tile|1  
TATTTGTGGCTTGCAGCACACTTGTATATATATGTTCTTGCTGATTGCATGTACCACAG  
>HPV82\_Alpha\_6970427\_nt7381\_Genome\_Tile|1  
CTTGTATATATATGTTCTTGCTGTATTGCATGTACCACAGGATTCCATTTTGTTTTTTCC  
>HPV82\_Alpha\_6970427\_nt7481\_Genome\_Tile|1  
TGACTACATTTGCCAACTTTTGAACCACACTACCTATGTTTTTTGGCATAACCCTTAATT  
>HPV82\_Alpha\_6970427\_nt7501\_Genome\_Tile|1  
TGAACCACACTACCTATGTTTTTTGGCATAACCCTTAATTCTTTTGGCATGGTATGTACA  
>HPV82\_Alpha\_6970427\_nt7701\_Genome\_Tile|1  
TTTGGCTTATTTTGCCTTTATTAATTGCATACTTGGCAGGTCATGAACTAAATGTCTCTG  
>HPV51\_Alpha\_333087\_nt0061\_Genome\_Tile|1  
TATAAAAGTGCAGTGGTAAAAGTATAGAAGAACACCATGTTCTGAAGACAAGAGGGAAAGA  
>HPV51\_Alpha\_333087\_nt0281\_Genome\_Tile|1  
TATGCAAACAATGTTTACTGTTTTATTCAAAAATTAGAGAGTATAGACGTTATAGCAGGT  
>HPV51\_Alpha\_333087\_nt0501\_Genome\_Tile|1  
ATGCGCTAATTGCTGGCAACGTACACGACAACGTAACGAAACCCAAGTGTAAATAAGCCA  
>HPV51\_Alpha\_333087\_nt0981\_Genome\_Tile|1  
TGAAAATGCAGATGATACAGGATCTGATTTAATAAACTTTATAGATAGTGAACTAGTAT  
>HPV51\_Alpha\_333087\_nt1161\_Genome\_Tile|1  
ATTAGGAGACATTACAAATCAAAACAACACACACAGCCATAGTCAGGCAAACGAGTCACA  
>HPV51\_Alpha\_333087\_nt1341\_Genome\_Tile|1  
TAGTAGCGGGGGGGCAGTGTATGGATGTGGAAACAACAGAAAGCTGTGCAAATGTAGA  
>HPV51\_Alpha\_333087\_nt1621\_Genome\_Tile|1  
ATACAATGTTTATCATGTGATTGGGGCACCATTGTATTAATGCTAATTAGGTTTTTCATGT  
>HPV51\_Alpha\_333087\_nt2081\_Genome\_Tile|1  
GAAAATCATTATCTATGTCAGCCTGGATAAGGTATAGATGTGATAGAGCAAAGGATGGAG  
>HPV51\_Alpha\_333087\_nt2101\_Genome\_Tile|1  
GCCTGGATAAGGTATAGATGTGATAGAGCAAAGGATGGAGGCAACTGGAGAGAAATTGCT  
>HPV51\_Alpha\_333087\_nt2121\_Genome\_Tile|1  
TGATAGAGCAAAGGATGGAGGCAACTGGAGAGAAATTGCTAAATTTTAAAGATATCAAGG  
>HPV51\_Alpha\_333087\_nt2501\_Genome\_Tile|1  
TAGTATGTCCACCATTACTAATAACGTCAAACATAAATCCACAAGAGGATGCAAACCTAA  
>HPV51\_Alpha\_333087\_nt2521\_Genome\_Tile|1  
ATAACGTCAAACATAAATCCACAAGAGGATGCAAACCTAATGTATTTACATACAAGGGTA  
>HPV51\_Alpha\_333087\_nt2841\_Genome\_Tile|1

CTATGTTTTATGCAGCACGGGAAAGAACTTACGAACAATCAATCACCAGGTAGTACCAG  
>HPV51\_Alpha\_333087\_nt3021\_Genome\_Tile|1  
TATGGTGTGTGGCTCCCAAGCAATGTTTCAAAAAGGGGGGCATAACTGTAACAGTTATAT  
>HPV51\_Alpha\_333087\_nt3101\_Genome\_Tile|1  
GCAATGGACTATACAAGCTGGAAATTTATATATATATATGATAATGATAAGTGGGTAAAG  
>HPV51\_Alpha\_333087\_nt3121\_Genome\_Tile|1  
GAAATTTATATATATATATGATAATGATAAGTGGGTAAAGACAAATGGAAATGTGGACTA  
>HPV51\_Alpha\_333087\_nt3141\_Genome\_Tile|1  
ATAATGATAAGTGGGTAAAGACAAATGGAAATGTGGACTATACGGGTATATATTACACTG  
>HPV51\_Alpha\_333087\_nt3161\_Genome\_Tile|1  
ACAAATGGAAATGTGGACTATACGGGTATATATTACACTGTAAATTCAAAAAAGAATAT  
>HPV51\_Alpha\_333087\_nt3181\_Genome\_Tile|1  
TACGGGTATATATTACACTGTAAATTCAAAAAAGAATATTATGTACAGTTTAAAGATGA  
>HPV51\_Alpha\_333087\_nt3601\_Genome\_Tile|1  
AAAATGTTTTAGATACAGATTTACAAAACACAAAGGGTTATATAAAAACGTATCCTCAAC  
>HPV51\_Alpha\_333087\_nt3721\_Genome\_Tile|1  
TCAACGGGAAACATTTATAAAAACCATTAAGTACCCCAAGTGTAACTGTCAATTGGG  
>HPV51\_Alpha\_333087\_nt3741\_Genome\_Tile|1  
AAACCATTAAGTACCCCAAGTGTAACTGTCAATTGGGAATTATGACACTGTAAC TAG  
>HPV51\_Alpha\_333087\_nt3761\_Genome\_Tile|1  
AGTGTAACTGTCAATTGGGAATTATGACACTGTAAC TAGTGAATATATGTATTGTACA  
>HPV51\_Alpha\_333087\_nt4021\_Genome\_Tile|1  
CCAATTAAC TACATTTTTTTGTATATTTGATTTTTTTTTTACTTACCTTGTTTACTTTTACA  
>HPV51\_Alpha\_333087\_nt4041\_Genome\_Tile|1  
TATATTTGATTTTTTTTTTACTTACCTTGTTTACTTTTACATCTATATACATTTTTTACTTT  
>HPV51\_Alpha\_333087\_nt4081\_Genome\_Tile|1  
TCTATATACATTTTTTACTTTTGCAATAAACTTGTTATATTTTTTG TGATTAAATATGGTGG  
>HPV51\_Alpha\_333087\_nt4341\_Genome\_Tile|1  
GGATATATCCCTTTAGGTGGTGGGGGTCGCCAGGCGTGGTGATATTGCTCCTGCAAGG  
>HPV51\_Alpha\_333087\_nt4401\_Genome\_Tile|1  
CCACCTATTATAATTGACCTATGGCACCATACTGAACCTTCTATAGTAAATTTGGTTGAG  
>HPV51\_Alpha\_333087\_nt4621\_Genome\_Tile|1  
ATATTGAACCTCCATCCATTGAGGCTCCACAATCTGGAGAAGTGTGAGATATATATTTAC  
>HPV51\_Alpha\_333087\_nt4661\_Genome\_Tile|1  
AGTGTGAGATATATATTTACTAGTACACTACTCTGGTACTCATGGGTATGAAGAAATACC  
>HPV51\_Alpha\_333087\_nt4761\_Genome\_Tile|1  
CCTATTAGCAGCACACCTACTCCAGGGGTTAGTCGCATAGCTGCTCCCCGCTTG TATAGT  
>HPV51\_Alpha\_333087\_nt4781\_Genome\_Tile|1  
TCCAGGGGTTAGTCGCATAGCTGCTCCCCGCTTG TATAGTAAGTCTACACACAGGTTAA  
>HPV51\_Alpha\_333087\_nt4801\_Genome\_Tile|1  
CTGCTCCCCGCTTG TATAGTAAGTCTACACACAGGTTAAAGTTACAAATCCTGATTTTA  
>HPV51\_Alpha\_333087\_nt5241\_Genome\_Tile|1  
ATGTCACACTCCTCTTTGTCTAGGCAGTTGCCCTCCTTATCTTCATCTATGTCTTCATCT  
>HPV51\_Alpha\_333087\_nt5261\_Genome\_Tile|1  
TAGGCAGTTGCCCTCCTTATCTTCATCTATGTCTTCATCTTATGCAAATGTTACTATTCC  
>HPV51\_Alpha\_333087\_nt5281\_Genome\_Tile|1  
CTTCATCTATGTCTTCATCTTATGCAAATGTTACTATTCCATTTTCAACTACATATTCTG  
>HPV51\_Alpha\_333087\_nt5321\_Genome\_Tile|1  
ATTTTCAACTACATATTCTGTTCTATTATACAGGGCCTGATGTGGTATTGCCACATC  
>HPV51\_Alpha\_333087\_nt5341\_Genome\_Tile|1  
TTCCTATTACATACAGGGCCTGATGTGGTATTGCCACATCTCCTACAGTATGGCCTTATG  
>HPV51\_Alpha\_333087\_nt5361\_Genome\_Tile|1  
GATGTGGTATTGCCACATCTCCTACAGTATGGCCTTATGTTCCCCACACTTCCATTGAC  
>HPV51\_Alpha\_333087\_nt5381\_Genome\_Tile|1  
TCCTACAGTATGGCCTTATGTTCCCCACACTTCCATTGACACCAAGCATTTCTATTGTTAT

>HPV51\_Alpha\_333087\_nt5421\_Genome\_Tile|1  
ACCAAGCATTCTATTGTTATACTAGGTGGGGATTACTATTTGTGGCCCTATACACATTTA  
>HPV51\_Alpha\_333087\_nt7001\_Genome\_Tile|1  
CCTCTTCAGCCAAACGTAAACGTGTTAAAAAGTAATGTATGTTAGTTTTTGTATGCTTGT  
>HPV51\_Alpha\_333087\_nt7021\_Genome\_Tile|1  
CGTGTTAAAAAGTAATGTATGTTAGTTTTTGTATGCTTGTGCACACTGTTGTATGCCTGT  
>HPV51\_Alpha\_333087\_nt7301\_Genome\_Tile|1  
CATTTTTTGCAGCACAAACAGTTTATATTTGTGCTATTTAGTTATACTTTGTAGCTTCCAT  
>HPV51\_Alpha\_333087\_nt7421\_Genome\_Tile|1  
TTTGCCAAGTTTTAAACCACAACCTGCCAGTTGTTTTTGGCATAAACCATCATTTTTTTTAT  
>HPV51\_Alpha\_333087\_nt7621\_Genome\_Tile|1  
GGCATGTATTTTTTGGCATATTTTATCTTACTAATTGCATAGTTGGCAGGTCAAATACTA  
>HPV51\_Alpha\_333087\_nt7641\_Genome\_Tile|1  
TTTTATCTTACTAATTGCATAGTTGGCAGGTCAAATACTATGTTTTTAGTGCCAAGTTTC  
>HPV47\_Beta\_333062\_nt0001\_Genome\_Tile|1  
AACGGTAAGTTTGCATTAATGTACCAGGTGCGGTACAGATCATTTTACAATGGATATTAT  
>HPV47\_Beta\_333062\_nt0121\_Genome\_Tile|1  
ACAGTATTTTATATTAATATATAAATAAATAAATATATAAATGTGTATTTATTTCTCAGG  
>HPV47\_Beta\_333062\_nt0161\_Genome\_Tile|1  
ATGTGTATTTATTTCTCAGGCTCAGTTCTTTGCAATTATTAAGACAAATGGCTCAGAAGG  
>HPV47\_Beta\_333062\_nt0181\_Genome\_Tile|1  
CTCAGTTCTTTGCAATTATTAAGACAAATGGCTCAGAAGGCTTTGGAACAGACTACAGTT  
>HPV47\_Beta\_333062\_nt0201\_Genome\_Tile|1  
AAGACAAATGGCTCAGAAGGCTTTGGAACAGACTACAGTTAAAGAGGAAAAGCTAGAACT  
>HPV47\_Beta\_333062\_nt0221\_Genome\_Tile|1  
CTTTGGAACAGACTACAGTTAAAGAGGAAAAGCTAGAACTACCTACTACTATTAGAGGCT  
>HPV47\_Beta\_333062\_nt0241\_Genome\_Tile|1  
AAAGAGGAAAAGCTAGAACTACCTACTACTATTAGAGGCTTAGCTCAATTGTTAGACATA  
>HPV47\_Beta\_333062\_nt0281\_Genome\_Tile|1  
TAGCTCAATTGTTAGACATACCTTTAGTAGATTGTTTGCTACCTTGCAACTTTTGTGGCA  
>HPV47\_Beta\_333062\_nt0501\_Genome\_Tile|1  
TGAGCTAGCTACAGGCCTTTCCATTTTGTAGATTGACATAAGGTGTCATACCTGCCTGTC  
>HPV47\_Beta\_333062\_nt0521\_Genome\_Tile|1  
CCATTTTTGAGATTGACATAAGGTGTCATACCTGCCTGTCATTTCTTGACATTATTGAAA  
>HPV47\_Beta\_333062\_nt0861\_Genome\_Tile|1  
TTCGCATTTTTGTGAACGCAACAAACCGTGGCATCAGGACATTTTACAGGAACTTTTGACTG  
>HPV47\_Beta\_333062\_nt0881\_Genome\_Tile|1  
ACAAACCGTGGCATCAGGACATTTTACAGGAACCTTTTGACTGGTGATCTGCAGCTCCTCTGC  
>HPV47\_Beta\_333062\_nt1801\_Genome\_Tile|1  
GATGTATGGGACCTGGAGTGTTACCCACGGTCTTACCCTGAATGGATTGCACAATTAA  
>HPV47\_Beta\_333062\_nt1821\_Genome\_Tile|1  
TTCACCCACGGTCTTACCCTGAATGGATTGCACAATTAACCATTTTGGGCCATAAGAGT  
>HPV47\_Beta\_333062\_nt2101\_Genome\_Tile|1  
CTGAGTGATATATACAAGGATACATGAAGTAGAGGGAGAAGGACAGTGGTCTAGCATTG  
>HPV47\_Beta\_333062\_nt2281\_Genome\_Tile|1  
AGTCATCGTTTGAATGTCCTTAATAAAAGTTCTAAGGGGGAGAGTATTATCATTTGTAA  
>HPV47\_Beta\_333062\_nt2501\_Genome\_Tile|1  
AACAAAGTTTCCACCTTTAATACTTACATCTAATATTAATGTACATGCAGAGACCAATTA  
>HPV47\_Beta\_333062\_nt2541\_Genome\_Tile|1  
GTACATGCAGAGACCAATTATAGATACCTACATAGTAGAATTAAGGGTTTTGAATTTAAA  
>HPV47\_Beta\_333062\_nt2861\_Genome\_Tile|1  
CTAGGCAGAAAAGGCATAAATAGTTGGGATACCAACCAGTGCCTGCATTAGCAATATCTG  
>HPV47\_Beta\_333062\_nt2901\_Genome\_Tile|1  
GCCTGCATTAGCAATATCTGAGGCAAGGGCCAAAGAGGCTATATATATGGTGTTGCAGTT  
>HPV47\_Beta\_333062\_nt2941\_Genome\_Tile|1

ATATATATGGTGTTCAGTTAGAGTCGCTACAAAAATCAGCGTTTGCTTTGGAGCCTTGG  
>HPV47\_Beta\_333062\_nt3161\_Genome\_Tile|1  
GGCATAAGACAACAAGTGGGGTCAATCAAACCTGGCATTCTACTACCTATATGGAACATTTA  
>HPV47\_Beta\_333062\_nt3181\_Genome\_Tile|1  
GTCAATCAAACCTGGCATTCTACTACCTATATGGAACATTTAAACACTATTATGTGTTATTT  
>HPV47\_Beta\_333062\_nt3621\_Genome\_Tile|1  
CAAGACTCGTGCTCGTTCCAGGTCAAGGTCCACCTCCAGATCTACCAGCACCACCAGTAG  
>HPV47\_Beta\_333062\_nt3681\_Genome\_Tile|1  
AAGGGGAGGTAGAGGGTCATCCACAAGGCAAAGATCGCGATCACCTCCACCTACACCTC  
>HPV47\_Beta\_333062\_nt4161\_Genome\_Tile|1  
CCTCACTCAGAGAAGGGATTTTGATGATGCTGTCAAATATCCAAAAGGAGTCGAGTGGTC  
>HPV47\_Beta\_333062\_nt4181\_Genome\_Tile|1  
TTGATGATGCTGTCAAATATCCAAAAGGAGTCGAGTGGTCATATGGTAGTCTTGATAGCC  
>HPV47\_Beta\_333062\_nt4201\_Genome\_Tile|1  
CCAAAAGGAGTCGAGTGGTCATATGGTAGTCTTGATAGCCTTTAACAAGCATTAACGCTG  
>HPV47\_Beta\_333062\_nt4261\_Genome\_Tile|1  
CTTTGCTACTAACTGCTATTAAACAACCACAGCTTTTTTTTTTACGTTTTTTTTTATTTTACTG  
>HPV47\_Beta\_333062\_nt4621\_Genome\_Tile|1  
TGGACCAGTTGATATTTTACCCATTGACACAATCGCACCTGTGCGAGCCTACTGCTTCATC  
>HPV47\_Beta\_333062\_nt4641\_Genome\_Tile|1  
CCATTGACACAATCGCACCTGTGCGAGCTACTGCTTCATCTTTAGTCCCATTAAACAGAGT  
>HPV47\_Beta\_333062\_nt4661\_Genome\_Tile|1  
GTCGAGCCTACTGCTTCATCTTTAGTCCCATTAAACAGAGTCGTCTGGTGCTGATTTACTT  
>HPV47\_Beta\_333062\_nt4741\_Genome\_Tile|1  
AGCCGAAATACATCCTATTTCCTGAAGGTCCGACAATCGACTCCCCCTGTAGTCACCACAAC  
>HPV47\_Beta\_333062\_nt4881\_Genome\_Tile|1  
ATAATCCCTCTTTTCAGATACTCACTGAATCAACACCTGCGCAGGGCGAGAGTTCTCTTG  
>HPV47\_Beta\_333062\_nt4901\_Genome\_Tile|1  
CTCACTGAATCAACACCTGCGCAGGGCGAGAGTTCTCTTGCTGACCATATTTTGGTCACC  
>HPV47\_Beta\_333062\_nt4941\_Genome\_Tile|1  
CTGACCATATTTTGGTCACCTCAGGGTCTGGTGGACAAAGGATAGGCGGTGATATAACAG  
>HPV47\_Beta\_333062\_nt4961\_Genome\_Tile|1  
TCAGGGTCTGGTGGACAAAGGATAGGCGGTGATATAACAGACGAAATTGAACTTACTGAG  
>HPV47\_Beta\_333062\_nt4981\_Genome\_Tile|1  
GATAGGCGGTGATATAACAGACGAAATTGAACTTACTGAGTTTCCAAGCAGATATACATT  
>HPV47\_Beta\_333062\_nt5081\_Genome\_Tile|1  
CCATTACAAACTGTAGCCTCTGCAGTAAGGCGACGGGGCTTCTCATTAACAAATAGAAGA  
>HPV47\_Beta\_333062\_nt5301\_Genome\_Tile|1  
ATATTAAACAATTGGGCCGTCTCAATATTCTACAACACCAGCAGGTTATATTAGGGTAA  
>HPV47\_Beta\_333062\_nt5421\_Genome\_Tile|1  
TACACTTTTATAGAGATTTAAGTTCTATAAACTACTGAGGATCCAATAGAACTACAGCTTT  
>HPV47\_Beta\_333062\_nt5561\_Genome\_Tile|1  
CCTTTATCTGAAACAATAGATGCTTCATCTAATGATTTACTTTTGGATGAGACTGTGGAG  
>HPV47\_Beta\_333062\_nt5661\_Genome\_Tile|1  
GTACAACATCATATACTGTTCCAGATTTGAGACTACTAGAAGTAGTTCCTATTATGTTT  
>HPV47\_Beta\_333062\_nt5681\_Genome\_Tile|1  
CCCAGATTTGAGACTACTAGAAGTAGTTCCTATTATGTTCAAGACACAGATGGTTATTAT  
>HPV47\_Beta\_333062\_nt5701\_Genome\_Tile|1  
AAGTAGTTCCTATTATGTTCAAGACACAGATGGTTATTATGTTGCTTACCCAGAGTCACG  
>HPV47\_Beta\_333062\_nt5721\_Genome\_Tile|1  
AAGACACAGATGGTTATTATGTTGCTTACCCAGAGTCACGGGACACTATTGATATTATTT  
>HPV47\_Beta\_333062\_nt5741\_Genome\_Tile|1  
GTTGCTTACCCAGAGTCACGGGACACTATTGATATTATTTACCCTACACCTGAATTACCT  
>HPV47\_Beta\_333062\_nt5761\_Genome\_Tile|1  
GGACACTATTGATATTATTTACCCTACACCTGAATTACCTGTAGTTGTCATTACACCCCA

>HPV47\_Beta\_333062\_nt6941\_Genome\_Tile|1  
ACAAGAAATACAAATTTTCAGCATCTCTGTTTACTCTCAGGCAGGGGACATAAAGGATATA  
>HPV47\_Beta\_333062\_nt6961\_Genome\_Tile|1  
CATCTCTGTTTACTCTCAGGCAGGGGACATAAAGGATATACAGGATTATAATGCAGACAA  
>HPV47\_Beta\_333062\_nt6981\_Genome\_Tile|1  
CAGGGGACATAAAGGATATACAGGATTATAATGCAGACAATTTTAGAGAGTATCAAAGAC  
>HPV47\_Beta\_333062\_nt7161\_Genome\_Tile|1  
TTGTGCCTACTCCAGACAACCCTATTTCAGGATACATATAGATATCTAGAATCTTTGGCCA  
>HPV47\_Beta\_333062\_nt7181\_Genome\_Tile|1  
CCTATTTCAGGATACATATAGATATCTAGAATCTTTGGCCACTAGGTGTCCTGAAAAGTCT  
>HPV47\_Beta\_333062\_nt7221\_Genome\_Tile|1  
CTAGGTGTCCTGAAAAGTCTCCTCCAAAAGAGAAGGTTGACCCCTACAAAGGTTTAAACT  
>HPV47\_Beta\_333062\_nt7621\_Genome\_Tile|1  
ACGCTCGGATTAGGTCTTCTGCCAAAAGAAATTTAATCTTGTTATCGTTTTTGGCGATCA  
>HPV67\_Alpha\_3228267\_nt0061\_Genome\_Tile|1  
ATATATAAAGCACACCAGTGTCCACCTACAGTGCAAGAAATATGTTTCAGGACACAGACG  
>HPV67\_Alpha\_3228267\_nt0261\_Genome\_Tile|1  
TACAGATGTGGGAATCCGTATGGGGTATGTAAGCAATGCCTAAGACTGTTATCAAAAGTT  
>HPV67\_Alpha\_3228267\_nt0281\_Genome\_Tile|1  
TGGGGTATGTAAGCAATGCCTAAGACTGTTATCAAAAGTTAGTGAATATAGATATTTTAA  
>HPV67\_Alpha\_3228267\_nt0341\_Genome\_Tile|1  
CTATTCAGTATATGGAAATACTTTAGAAGAAATTGTGCATAAACCATTAAATGAAATTAC  
>HPV67\_Alpha\_3228267\_nt0361\_Genome\_Tile|1  
CTTTAGAAGAAATTGTGCATAAACCATTAAATGAAATTACAATACGATGTATAACATGTC  
>HPV67\_Alpha\_3228267\_nt0501\_Genome\_Tile|1  
GGACGGTGTTCAGTGTGTTGGAGACCTCAACGAACGCAGACCCAGGTATAATATTTGAAG  
>HPV67\_Alpha\_3228267\_nt0521\_Genome\_Tile|1  
GAGACCTCAACGAACGCAGACCCAGGTATAATATTTGAAGCCATGCGTGGAGACAAAGCT  
>HPV67\_Alpha\_3228267\_nt0701\_Genome\_Tile|1  
GCAAAACCAGATACAACCAATTACCATATTGTTACTGTGTGTAACATCTGTGAGTGCACCT  
>HPV67\_Alpha\_3228267\_nt0721\_Genome\_Tile|1  
TTACCATATTGTTACTGTGTGTAACATCTGTGAGTGCACCTTTGCGTTTGTGCATTACACAG  
>HPV67\_Alpha\_3228267\_nt0781\_Genome\_Tile|1  
TACAGCAGCAGACGTCCGAACAATCCAGCAGATGCTTATGAACACACTAGGAATAGTGTG  
>HPV67\_Alpha\_3228267\_nt0981\_Genome\_Tile|1  
AGGATGAGGATGCATCTGACACTGGTAGTGATTTAATTGGCTTTATAGATGATACACATA  
>HPV67\_Alpha\_3228267\_nt1141\_Genome\_Tile|1  
TACAGGCATACAGGCATGTGGTGGTAATAGTAATGGTATAGAAAACCAAGCATGTACAGC  
>HPV67\_Alpha\_3228267\_nt1161\_Genome\_Tile|1  
GTGGTAATAGTAATGGTATAGAAAACCAAGCATGTACAGCCGCAAAACGCAGAGCATACG  
>HPV67\_Alpha\_3228267\_nt1181\_Genome\_Tile|1  
GAAAACCAAGCATGTACAGCCGCAAAACGCAGAGCATACGACATAGAAGACAGCGGATAT  
>HPV67\_Alpha\_3228267\_nt1321\_Genome\_Tile|1  
TAGTACGGGGGCAAGTAGTACGGGAAACAGTGTAGATATGCAATCGGAAAGTAATAGTAG  
>HPV67\_Alpha\_3228267\_nt1361\_Genome\_Tile|1  
CAATCGGAAAGTAATAGTAGTCAGGAACAAAGCATGCCATTGCAAACTGTGGAAAATATT  
>HPV67\_Alpha\_3228267\_nt1381\_Genome\_Tile|1  
TCAGGAACAAAGCATGCCATTGCAAACTGTGGAAAATATTATGCATGTAAATAATATAAA  
>HPV67\_Alpha\_3228267\_nt1401\_Genome\_Tile|1  
TGCAAACTGTGGAAAATATTATGCATGTAAATAATATAAAGGCAACGTTAATGCATAAAT  
>HPV67\_Alpha\_3228267\_nt1441\_Genome\_Tile|1  
GGCAACGTTAATGCATAAATTTAAGGAAGCATATGGGGTAACGTTTACACAGCTAATAAG  
>HPV67\_Alpha\_3228267\_nt1461\_Genome\_Tile|1  
TTAAGGAAGCATATGGGGTAACGTTTACACAGCTAATAAGACCATTTAAAAGTGACAGGA  
>HPV67\_Alpha\_3228267\_nt1561\_Genome\_Tile|1

ACCATCAGTAGCAGAAAGTTTAAAGGTGTTAATCAAGCCACAAACGTTGTACACACATTT  
>HPV67\_Alpha\_3228267\_nt2481\_Genome\_Tile|1  
ATAAAGCGTTAGTACAGCTAAAATGTCCACCATTACTATTAACCTCCAACATAGATGTAG  
>HPV67\_Alpha\_3228267\_nt2501\_Genome\_Tile|1  
AAATGTCCACCATTACTATTAACCTCCAACATAGATGTAGCAACAGATTCAAGATGGCCG  
>HPV67\_Alpha\_3228267\_nt2521\_Genome\_Tile|1  
AACTTCCAACATAGATGTAGCAACAGATTCAAGATGGCCGTTTTTACATAGTAGAGTAGT  
>HPV67\_Alpha\_3228267\_nt2541\_Genome\_Tile|1  
CAACAGATTCAAGATGGCCGTTTTTACATAGTAGAGTAGTAGTGTTTAGATTTAACAATC  
>HPV67\_Alpha\_3228267\_nt2781\_Genome\_Tile|1  
GCTAATAAAAAAGACTTATGTACACAAATTGAACATTGGAGACTGAGACGCATTGAATGT  
>HPV67\_Alpha\_3228267\_nt2821\_Genome\_Tile|1  
GACTGAGACGCATTGAATGTGCTTTGTATTATAAAGCTAAAGAACTGGGACTGGCACGGA  
>HPV67\_Alpha\_3228267\_nt2981\_Genome\_Tile|1  
TAGTAATGATGAATGGACATTGCAAAGTACCAGCCTAGAACTATGGTTATGTGAACCAAA  
>HPV67\_Alpha\_3228267\_nt3001\_Genome\_Tile|1  
TGCAAAGTACCAGCCTAGAACTATGGTTATGTGAACCAAAAAAATGTTTAAAAAAAAG  
>HPV67\_Alpha\_3228267\_nt3041\_Genome\_Tile|1  
AAAATGTTTAAAAAAAAGGAGAGACTGTAACAGTGCAATACGATAATGATAAAGAAAA  
>HPV67\_Alpha\_3228267\_nt3081\_Genome\_Tile|1  
TACGATAATGATAAAGAAAATACAATGGAATATACAAGTTGGAATGAAATATATATAGTA  
>HPV67\_Alpha\_3228267\_nt3121\_Genome\_Tile|1  
GGAATGAAATATATATAGTAAAGGACTCTGTGTGGACAGTGGTAGTGGGAAAGGTGGACT  
>HPV67\_Alpha\_3228267\_nt3141\_Genome\_Tile|1  
AAGGACTCTGTGTGGACAGTGGTAGTGGGAAAGGTGGACTATATGGGACTATATTATATA  
>HPV67\_Alpha\_3228267\_nt3201\_Genome\_Tile|1  
TATGAAACAGAAAAAACGTATTATGTAAAGTTTGAAACCGATGCTAAAAAGTATTCAAAA  
>HPV67\_Alpha\_3228267\_nt3321\_Genome\_Tile|1  
AGTAACGAAATATCCACTACTGAGGTTGCTGCCCCGATACCACACGCCACAGAAACGTAT  
>HPV67\_Alpha\_3228267\_nt3441\_Genome\_Tile|1  
GACGTCCCAGACTTCTGCAACAACCTCCCAGCACCCACAAAGCTATTGTGCAGACAACGG  
>HPV67\_Alpha\_3228267\_nt3461\_Genome\_Tile|1  
CAACTCCCAGCACCCACAAAGCTATTGTGCAGACAACGGTCCGTGGACTGTACATCGGT  
>HPV67\_Alpha\_3228267\_nt3801\_Genome\_Tile|1  
ATTGTTTGTGGTATAATGTCATTGTAATATATTGTATATTACTACATTACACACAAGCCA  
>HPV67\_Alpha\_3228267\_nt3861\_Genome\_Tile|1  
ATATGTGCTGCTAAGTTGTATATATAGGTATACTATACAATGCTGGCCATTTTTGTATTT  
>HPV67\_Alpha\_3228267\_nt3881\_Genome\_Tile|1  
TATATAGGTATACTATACAATGCTGGCCATTTTTGTATTTGCATTTGTGTTGCTGTTGTG  
>HPV67\_Alpha\_3228267\_nt4021\_Genome\_Tile|1  
GTTTTATAGGTTCCCCCTTACGGGTATTTTTGGCATATCTTATATTTTTGTACCTACCTA  
>HPV67\_Alpha\_3228267\_nt4041\_Genome\_Tile|1  
CGGGTATTTTTGGCATATCTTATATTTTTGTACCTACCTATGATGTGTATTCATTTACAT  
>HPV67\_Alpha\_3228267\_nt4061\_Genome\_Tile|1  
TATATTTTTGTACCTACCTATGATGTGTATTTCATTTACATGCACAGTATATTGTTTCCTA  
>HPV67\_Alpha\_3228267\_nt4081\_Genome\_Tile|1  
TGATGTGTATTCATTTACATGCACAGTATATTGTTTCCTAATACTTTGTATACTGTATGT  
>HPV67\_Alpha\_3228267\_nt4141\_Genome\_Tile|1  
ATTTGTACATATTTATTGTTTTGTGCACAGTGTGGTACAATGGCATACTTTTTATATTTA  
>HPV67\_Alpha\_3228267\_nt4181\_Genome\_Tile|1  
TGGCATACTTTTTATATTTACTAATAAACCATTTTTTTTACTAGTGTGTACAATG  
>HPV67\_Alpha\_3228267\_nt4421\_Genome\_Tile|1  
GGGTCTGGTACGGGTGGTAGAACAGGTTATGTCCCCTTATCTACACGGCCTCCCACTGCA  
>HPV67\_Alpha\_3228267\_nt4441\_Genome\_Tile|1  
AACAGGTTATGTCCCCTTATCTACACGGCCTCCCACTGCATCTGCGCCTACATCTACAAT

>HPV67\_Alpha\_3228267\_nt4481\_Genome\_Tile|1  
TCTGCGCCTACATCTACAATACGACCCCCTGTATCTGTTGATACTGTAGGGCCCCTAGAC  
>HPV67\_Alpha\_3228267\_nt4701\_Genome\_Tile|1  
TTACCACCCATTTAAATCCCACCTTTTACAGAACCTTCAGTACTCCGCCCATTTTCATCTT  
>HPV67\_Alpha\_3228267\_nt4721\_Genome\_Tile|1  
ACTTTTACAGAACCTTCAGTACTCCGCCCATTTTCATCTTCTGAAGCCTCTGGTCATTTA  
>HPV67\_Alpha\_3228267\_nt4741\_Genome\_Tile|1  
ACTCCGCCCATTTTCATCTTCTGAAGCCTCTGGTCATTTAATATTTTCTACACCCACTAT  
>HPV67\_Alpha\_3228267\_nt4841\_Genome\_Tile|1  
ATTGTTTCTACTACTAGTGACAATGTAAGTAGTAGCACCCTATTCTTAGGCCTCGCCCC  
>HPV67\_Alpha\_3228267\_nt4981\_Genome\_Tile|1  
ATTAATTACATTTGATAATCCTGCATTTCAACCTACAGAACCTGATGAAACACTTTACTT  
>HPV67\_Alpha\_3228267\_nt5021\_Genome\_Tile|1  
CCTGATGAAACACTTTACTTTCAACACCAAGACATTTTCACCTGCACCTGACCCTGACTTT  
>HPV67\_Alpha\_3228267\_nt5201\_Genome\_Tile|1  
GTGCATTATTATCAGGATTTAAGTCTATAGTACCTGCTGACTCCATAGAACTACAGCCA  
>HPV67\_Alpha\_3228267\_nt5221\_Genome\_Tile|1  
AAGTCCTATAGTACCTGCTGACTCCATAGAACTACAGCCATTATCTCGCCCTGTGTCTTC  
>HPV67\_Alpha\_3228267\_nt5241\_Genome\_Tile|1  
ACTCCATAGAACTACAGCCATTATCTCGCCCTGTGTCTTCTGCTTCCCATTCTATTAATG  
>HPV67\_Alpha\_3228267\_nt5301\_Genome\_Tile|1  
ATGGTTTATATGATGTATATATGGATCCTGACACACCCTTTCCACAGCCATCAATATCCT  
>HPV67\_Alpha\_3228267\_nt5321\_Genome\_Tile|1  
ATGGATCCTGACACACCCTTTCCACAGCCATCAATATCCTATTACATAGTCCTCAG  
>HPV67\_Alpha\_3228267\_nt5341\_Genome\_Tile|1  
TCCACAGCCATCAATATCCTATTACATTACATAGTCCTCAGACCACCAATGTTACTGTCCC  
>HPV67\_Alpha\_3228267\_nt5361\_Genome\_Tile|1  
ATTCATTACATAGTCCTCAGACCACCAATGTTACTGTCCCCTTAAGTAGTGGTTTTGATT  
>HPV67\_Alpha\_3228267\_nt5381\_Genome\_Tile|1  
ACCACCAATGTTACTGTCCCCTTAAGTAGTGGTTTTGATTTTCCATTTTCCTCTACTGTA  
>HPV67\_Alpha\_3228267\_nt5421\_Genome\_Tile|1  
TTCCATTTTCCTCTACTGTACCATTACAGCCAGGTCCTGATATTGTGTCCCCTGTAGCCC  
>HPV67\_Alpha\_3228267\_nt5481\_Genome\_Tile|1  
CTACATACACTCCTTTTGTACCTGTTATACCTACATCTCCCTTTAACAATGTACTTGTTT  
>HPV67\_Alpha\_3228267\_nt5501\_Genome\_Tile|1  
CCTGTTATACCTACATCTCCCTTTAACAATGTACTTGTTTATGGTAGTGATTTTATTTTA  
>HPV67\_Alpha\_3228267\_nt5741\_Genome\_Tile|1  
TTTAGCTGTAGGCCATCCTTACTTTTCCATTCCTAATCCCTCCAACACTAAAAAGGTGTT  
>HPV67\_Alpha\_3228267\_nt5981\_Genome\_Tile|1  
ATTACTTAATAAGTTTGATGATACTGAAACAAATAATAAATACCCTAGCCAGCCTGGTAC  
>HPV67\_Alpha\_3228267\_nt6001\_Genome\_Tile|1  
ATACTGAAACAAATAATAAATACCCTAGCCAGCCTGGTACTGATAATAGGGAATGCTTGT  
>HPV67\_Alpha\_3228267\_nt6121\_Genome\_Tile|1  
ACTGGGGTAAAGGTACCCCGTGTAGTGGTAACAGTAATGGGCCAGGTGCCTGTCCCCCTT  
>HPV67\_Alpha\_3228267\_nt6381\_Genome\_Tile|1  
ATGTTTGTAGGCATTTGTTTAAACAGAGCAGGTAAATTAGGGGAGGATGTACCTACAGAT  
>HPV67\_Alpha\_3228267\_nt6401\_Genome\_Tile|1  
TAACAGAGCAGGTAAATTAGGGGAGGATGTACCTACAGATTTGTATTTTAAGGGATCTGC  
>HPV67\_Alpha\_3228267\_nt6441\_Genome\_Tile|1  
TTGTATTTTAAGGGATCTGCAAACACTTCTGCACCTGCAAACCTCAGCTTTTTTTCCTACT  
>HPV67\_Alpha\_3228267\_nt6621\_Genome\_Tile|1  
GACACTACACGTAGTACCAACATGACTTTATGTTCTGAGGAAAAATCAGAGGCTACATAC  
>HPV67\_Alpha\_3228267\_nt6741\_Genome\_Tile|1  
TTTCAGCTGTGCAAAATATCCCTTACTGCAAATGTTATGCAATACATACACACCATGAAT  
>HPV67\_Alpha\_3228267\_nt7021\_Genome\_Tile|1

TATTGCAGGCAGGTTTTACAGCTAAACCTAAACTAAAACGTTCTTCACCTTCTTCTTCCT  
>HPV67\_Alpha\_3228267\_nt7101\_Genome\_Tile|1  
AAAAAGGTTAAAAGGTAATTGTATGACTGTTGTGTGTTTGTATTGTTGTATGTATGATT  
>HPV67\_Alpha\_3228267\_nt7121\_Genome\_Tile|1  
GTATGACTGTTGTGTGTTTGTATTGTTTGTATGTATGATTTGTATGTTTGTGTAATGTGT  
>HPV67\_Alpha\_3228267\_nt7161\_Genome\_Tile|1  
TGTATGTTTGTGTAATGTGTATGTTATGTGTATGCATGTTCCCTGTGTCTGTCAATTTCC  
>HPV67\_Alpha\_3228267\_nt7281\_Genome\_Tile|1  
CCCAATGAGTAAGGTACTGTCCCTATATCCCTGCCCATGCCATGCCCTTGCCTATCCCTG  
>HPV67\_Alpha\_3228267\_nt7301\_Genome\_Tile|1  
CCCTATATCCCTGCCCATGCCATGCCCTTGCCCTATCCCTGTATAATTATATGTAGCATAC  
>HPV67\_Alpha\_3228267\_nt7321\_Genome\_Tile|1  
CATGCCCTTGCCTATCCCTGTATAATTATATGTAGCATACTGTGTTTGGTATATTTATTA  
>HPV67\_Alpha\_3228267\_nt7341\_Genome\_Tile|1  
TATAATTATATGTAGCATACTGTGTTTGGTATATTTATTACTTTTACTTATAACATTACA  
>HPV67\_Alpha\_3228267\_nt7361\_Genome\_Tile|1  
TGTGTTTGGTATATTTATTACTTTTACTTATAACATTACAGTCTCCATTTTGGGTACTA  
>HPV67\_Alpha\_3228267\_nt7381\_Genome\_Tile|1  
CTTTTACTTATAACATTACAGTCTCCATTTTGGGTACTACTCCATTTTATATCTGTAAC  
>HPV67\_Alpha\_3228267\_nt7481\_Genome\_Tile|1  
GTTTCTTGCCAACATTGTTAATCTTTGTCTTCTGCAGTGCAATGCCTTTACTTGCTGTT  
>HPV67\_Alpha\_3228267\_nt7501\_Genome\_Tile|1  
ATCTTTGTCTTCCCTGCAGTGCAATGCCTTTACTTGCTGTTGCTCTCCCGCCTAAATTGAC  
>HPV67\_Alpha\_3228267\_nt7541\_Genome\_Tile|1  
GCTCTCCCGCCTAAATTGACTCATGGTATTGCAGTGCAACACGCCCTTTTACATGTTTTTA  
>HPV67\_Alpha\_3228267\_nt7621\_Genome\_Tile|1  
TTTTACCATGTTTTTATTGCTTAATTGCACTTTTGGCTTGCACAGCACTATTTTATTGGG  
>HPV67\_Alpha\_3228267\_nt7641\_Genome\_Tile|1  
TTAATTGCACTTTTGGCTTGCACAGCACTATTTTATTGGGTTTATGTTACTATTGTAAGC  
>HPV67\_Alpha\_3228267\_nt7681\_Genome\_Tile|1  
TTTATGTTACTATTGTAAGCCAACATACACCTTGTAATAATGATTCAAACCTTACTCACA  
>HPV67\_Alpha\_3228267\_nt7721\_Genome\_Tile|1  
GATTCAAACCTTACTCACACAGGTGTGTATGCACCGGTTTGGGTAAACATGTTCCAACC  
>HPV70\_Alpha\_1173493\_nt0061\_Genome\_Tile|1  
AAAACGGTGTATATAAAACCATGCAAAAGTTGCTTGCCCATACGGAATGGCGCGATTTCC  
>HPV70\_Alpha\_1173493\_nt1201\_Genome\_Tile|1  
AGCAATCTAAATAAAAGTCCTTGTGCAAAACCGCCAGGCGTACATAGGGAACAAAGGGTA  
>HPV70\_Alpha\_1173493\_nt1221\_Genome\_Tile|1  
TTGTGCAAAACCGCCAGGCGTACATAGGGAACAAAGGGTAACACTACAAGAGCTCCCGGT  
>HPV70\_Alpha\_1173493\_nt1241\_Genome\_Tile|1  
TACATAGGGAACAAAGGTAACACTACAAGAGCTCCCGGTAAACATATGCAATAAACAGG  
>HPV70\_Alpha\_1173493\_nt1281\_Genome\_Tile|1  
AAACATATGCAATAAACAGGCAAGAACAAACGTGTATTTCAGTACCAGACAGCGGCTATGG  
>HPV70\_Alpha\_1173493\_nt1461\_Genome\_Tile|1  
AGACAGTGCTATTGATAGTGAGAATCAAGATCCACAGTCACCTACTGCACAGCTAAAAAC  
>HPV70\_Alpha\_1173493\_nt1481\_Genome\_Tile|1  
AGAATCAAGATCCACAGTCACCTACTGCACAGCTAAAAACAGTATTACAGGCTAATAACC  
>HPV70\_Alpha\_1173493\_nt1501\_Genome\_Tile|1  
CCTACTGCACAGCTAAAAACAGTATTACAGGCTAATAACCAAAAAGCCATACTACTATCA  
>HPV70\_Alpha\_1173493\_nt1521\_Genome\_Tile|1  
AGTATTACAGGCTAATAACCAAAAAGCCATACTACTATCACAATTTAAACACACATATGG  
>HPV70\_Alpha\_1173493\_nt1541\_Genome\_Tile|1  
AAAAAGCCATACTACTATCACAATTTAAACACACATATGGATTAGCATTTAACGACCTGG  
>HPV70\_Alpha\_1173493\_nt1701\_Genome\_Tile|1  
GCCATATGCGTTATATACACATATACAGTGTTTGGATACCAAATATGGAGTGTATATACT



>HPV70\_Alpha\_1173493\_nt1721\_Genome\_Tile|1  
ATATACAGTGTGGATACCAAATATGGAGTGTATATACTACTATTAATTAGATATAAAT  
>HPV70\_Alpha\_1173493\_nt1781\_Genome\_Tile|1  
GTGGAAAAAACAGGATAACAGTAGGCAAAGGATTAAGTAAATTATTACATGTGCCAGAAA  
>HPV70\_Alpha\_1173493\_nt2221\_Genome\_Tile|1  
TGTGATAAATGTGACGATGGGGGCGACTGGCGACCAATAGTGCAATTTCTAAGGTATCAA  
>HPV70\_Alpha\_1173493\_nt3161\_Genome\_Tile|1  
AAAAAAGGTGTTACAGTGGAGGTGTGGTACGATGGAAACAAGGACAATTCTATGCATTAT  
>HPV70\_Alpha\_1173493\_nt3301\_Genome\_Tile|1  
ATATTATGTGCACGAGCAGCATAAGACATATTATGAAGTGTTTAAGCAGGATGCACAAAT  
>HPV70\_Alpha\_1173493\_nt3441\_Genome\_Tile|1  
ACGACACAGTACCCACTACTGAGCTTACTGCAGAACTACAACACACCACCCCGGCCATA  
>HPV70\_Alpha\_1173493\_nt3521\_Genome\_Tile|1  
ACCAAAAAAATAAGTCGGCGCCGTCTTGCAAGTGTGGAGTCTCCAGACCCCTCAGAAACA  
>HPV70\_Alpha\_1173493\_nt3541\_Genome\_Tile|1  
GCCGTCTTGCAAGTGTGGAGTCTCCAGACCCCTCAGAAACAGACGGAGTGTTCGTGGACCT  
>HPV70\_Alpha\_1173493\_nt3581\_Genome\_Tile|1  
GACGGAGTGTTCGTGGACCTTGTACAAAGTAAAGGCTGCAACAAACGACGGCACCAGTGT  
>HPV70\_Alpha\_1173493\_nt3681\_Genome\_Tile|1  
AAAATGGTTTAAAGTGTCTTAGGTATCGATTGCGAAAATTTAATTCATTGTATGAAAATA  
>HPV70\_Alpha\_1173493\_nt3761\_Genome\_Tile|1  
ATAGGGGGCAAGGAAGTAAACATACAGGTATACCTAAGTAAACATATACTACTGAAGCA  
>HPV70\_Alpha\_1173493\_nt3841\_Genome\_Tile|1  
AACTGTTAGAAATCCACCTAGTGTACATGTATCTGTGGGATATATGACATTGTAACAGCA  
>HPV70\_Alpha\_1173493\_nt3861\_Genome\_Tile|1  
GTGTACATGTATCTGTGGGATATATGACATTGTAACAGCACATGCTGTATGTATATTGTA  
>HPV70\_Alpha\_1173493\_nt4021\_Genome\_Tile|1  
ATATGTGGCTACTTTTATTTGTGTTTATTGTTGTACATACCACACCATTGCAAATGTTTT  
>HPV70\_Alpha\_1173493\_nt4081\_Genome\_Tile|1  
GTATATATTTACTATTTTTTATATTGCCATGTGGTTTTTACACATCCTTTCAGTATATG  
>HPV70\_Alpha\_1173493\_nt4101\_Genome\_Tile|1  
ATATTGCCATGTGGTTTTTACACATCCTTTCAGTATATGCTTAAGTTGTGTTGCTGCAT  
>HPV70\_Alpha\_1173493\_nt4121\_Genome\_Tile|1  
ACACATCCTTTCAGTATATGCTTAAGTTGTGTTGCTGCATAGTGTATTGTACATTACTTG  
>HPV70\_Alpha\_1173493\_nt4521\_Genome\_Tile|1  
CAGTTGGTAGAGGAATCTAGTGTGTTTCTCTGGTACACCCATCCCTACTTTTACAGGC  
>HPV70\_Alpha\_1173493\_nt5181\_Genome\_Tile|1  
AACATTACTGCAACAGAAGACATTGAGATGCAACCTTTACTTACCTCTGAATCTACAGAT  
>HPV70\_Alpha\_1173493\_nt5221\_Genome\_Tile|1  
TTACCTCTGAATCTACAGATGGTTTATATGATATATATGCAGATGCAGATATAGATAATG  
>HPV70\_Alpha\_1173493\_nt5261\_Genome\_Tile|1  
AGATGCAGATATAGATAATGCAATGTTACATACTACTTCTCATACAGGTCTACAGGACC  
>HPV70\_Alpha\_1173493\_nt5281\_Genome\_Tile|1  
CAATGTTACATACTACTTCTCATACAGGTCTACAGGACCTAGGTCCCATCTTTCATTTT  
>HPV70\_Alpha\_1173493\_nt5301\_Genome\_Tile|1  
CATACAGGTCTACAGGACCTAGGTCCCATCTTTCATTTCTTCTATACCTTCTACAGTG  
>HPV70\_Alpha\_1173493\_nt5321\_Genome\_Tile|1  
TAGGTCCCATCTTTCATTTCTTCTATACCTTCTACAGTGTCTACAAAATATAGTAATAC  
>HPV70\_Alpha\_1173493\_nt5341\_Genome\_Tile|1  
CTTCTATACCTTCTACAGTGTCTACAAAATATAGTAATACAACCATTCCATTTACTACTT  
>HPV70\_Alpha\_1173493\_nt5361\_Genome\_Tile|1  
TCTACAAAATATAGTAATACAACCATTCCATTTACTACTTCTTGGGACATACCTGTAACC  
>HPV70\_Alpha\_1173493\_nt5381\_Genome\_Tile|1  
AACCATTCCATTTACTACTTCTTGGGACATACCTGTAACCACTGGCCCTGACATAGTTTT  
>HPV70\_Alpha\_1173493\_nt5401\_Genome\_Tile|1

CTTGGGACATACCTGTAACCACTGGCCCTGACATAGTTTTACCTACTGCATCCCCCAATT  
>HPV70\_Alpha\_1173493\_nt5421\_Genome\_Tile|1  
ACTGGCCCTGACATAGTTTTACCTACTGCATCCCCCAATTTGCCCTTGTCCCTCCTACA  
>HPV70\_Alpha\_1173493\_nt6381\_Genome\_Tile|1  
GGTGGGCGACACAATACCTTCAGAGTTATATATTAAAGGCACGGATATACGTGAGCGTCC  
>HPV70\_Alpha\_1173493\_nt6401\_Genome\_Tile|1  
CAGAGTTATATATTAAAGGCACGGATATACGTGAGCGTCCTGGTACTCATGTATATTCCC  
>HPV70\_Alpha\_1173493\_nt6801\_Genome\_Tile|1  
AGTTACCCCTCCACCATCTGCAAGCTTGGTGGACACGTATAGGTATTTACAATCAGCAGC  
>HPV70\_Alpha\_1173493\_nt7001\_Genome\_Tile|1  
TAGGGGCTCGCAGACGTCCTACTATAGGCCCTCGCAAACGCCCTGCGTCAGCTAAATCGT  
>HPV70\_Alpha\_1173493\_nt7021\_Genome\_Tile|1  
ACTATAGGCCCTCGCAAACGCCCTGCGTCAGCTAAATCGTCTTCCCTCAGCCTCTAAACAC  
>HPV70\_Alpha\_1173493\_nt7081\_Genome\_Tile|1  
AAACGGAAACGTGTGTCCAAGTAATGTATGTATGTTGTATGCTGTGTATTATTGTACTAT  
>HPV70\_Alpha\_1173493\_nt7141\_Genome\_Tile|1  
TACATATTTGTGTTTTTATGTTGTATGCTTGCACACTGTTTACATATTTGTGTTTGTATG  
>HPV70\_Alpha\_1173493\_nt7181\_Genome\_Tile|1  
TACATATTTGTGTTTGTATGTTGTATGCTTGCACACTGTACTGTATATGTTTGTCCCTGGT  
>HPV70\_Alpha\_1173493\_nt7201\_Genome\_Tile|1  
TTGTATGCTTGCACACTGTACTGTATATGTTTGTCTCTGGTACATATTTGTGGTTGTATGT  
>HPV70\_Alpha\_1173493\_nt7221\_Genome\_Tile|1  
CTGTATATGTTTGTCTCTGGTACATATTTGTGGTTGTATGTGTATATGTTGCGTGCTATGT  
>HPV70\_Alpha\_1173493\_nt7441\_Genome\_Tile|1  
AGGTGTGTGTATACCATTTGTAGTTTATACATTTATATTTTATAGTGGGTACCTGTATA  
>HPV70\_Alpha\_1173493\_nt7461\_Genome\_Tile|1  
TAGTTTATACATTTATATTTTATAGTGGGTACCTGTATACAGCAACGGCCATTTTGTGT  
>HPV70\_Alpha\_1173493\_nt7541\_Genome\_Tile|1  
TTGGCTTTGTACCATCAGTTACCCTTATAAACCTTTTGTATCAGCAAAAACATGTCCTGT  
>HPV70\_Alpha\_1173493\_nt7561\_Genome\_Tile|1  
ACCCTTATAAACCTTTTGTATCAGCAAAAACATGTCCTGTAAACCTAAGTTCACCTACATA  
>HPV70\_Alpha\_1173493\_nt7601\_Genome\_Tile|1  
AACCTAAGTTCACCTACATACTTGGCACTACTAACAGTTTTAGTGGCGCACCTACACTTA  
>HPV70\_Alpha\_1173493\_nt7681\_Genome\_Tile|1  
CACTACAACAATGCTTTGGCAACCTTATGCACCTCCACCCTGTCTAATAAAGTGCTTTTA  
>HPV70\_Alpha\_1173493\_nt7761\_Genome\_Tile|1  
TTACTTACCTAAGAGCATAGTTGGCCTGTATAACAGCTTTTACATCCAAGAATGTGTCTGT  
>HPV70\_Alpha\_1173493\_nt7801\_Genome\_Tile|1  
TACATCCAAGAATGTGTCTGTTTGGTGCAAGTTATATTTTGTGACTAATATTTTACAGAC  
>HPV8\_Beta\_333074\_nt0001\_Genome\_Tile|1  
AACGGTAAGTTTCATCAGTGTAACAGGTGCGGTATGAAAATTTCTTAATCATAAGTTGTT  
>HPV8\_Beta\_333074\_nt0021\_Genome\_Tile|1  
TACCAGGTGCGGTATGAAAATTTCTTAATCATAAGTTGTTATTGCCAACAACCATCGTCT  
>HPV8\_Beta\_333074\_nt0121\_Genome\_Tile|1  
TTGTATATTAAATAAATAAATAAATATATATATATATTGTTACAATGCTGTGACTTGTGC  
>HPV8\_Beta\_333074\_nt0141\_Genome\_Tile|1  
TAAATATATATATATATTGTTACAATGCTGTGACTTGTGCAATTTTCCTAAGCAAATGGA  
>HPV8\_Beta\_333074\_nt0161\_Genome\_Tile|1  
TACAATGCTGTGACTTGTGCAATTTTCCTAAGCAAATGGACGGGCAGGACAAGGCTTCAT  
>HPV8\_Beta\_333074\_nt0181\_Genome\_Tile|1  
AATTTTTCCTAAGCAAATGGACGGGCAGGACAAGGCTTCATATTTAGACACTAATAAGGAC  
>HPV8\_Beta\_333074\_nt0241\_Genome\_Tile|1  
GAGCTACCCCTACTATTAAAGAGTTAGCTGCGGCTTTAGGTATTCCATTGCAGGACTGT  
>HPV8\_Beta\_333074\_nt0281\_Genome\_Tile|1  
GTATTCCATTGCAGGACTGTTTCAGTACCGTGCAACTTTTGTGGTAACTTTTGGATTCT

>HPV8\_Beta\_333074\_nt0321\_Genome\_Tile|1  
TGGTAACTTTTGGATTCTTAGAACTGTGTGAGTTTGACAAAAAGAGACTGTGCCTAAT  
>HPV8\_Beta\_333074\_nt0381\_Genome\_Tile|1  
TTGGAAAAATTACGTTGTTACTGCGTGTGTCGTTGTTGTTGTGTAGCAACCGCAACGTT  
>HPV8\_Beta\_333074\_nt0501\_Genome\_Tile|1  
ACGTTCAATTTTGGAGATAGACGTTAGGTGTCAAAACTGCTTGTTCATTTTGGATATCAT  
>HPV8\_Beta\_333074\_nt0841\_Genome\_Tile|1  
CAAGCTACGTCTTTTTGTCAACGCAACTGATTCGGGTATCAGGACCTTTCAAGAATTGCT  
>HPV8\_Beta\_333074\_nt0861\_Genome\_Tile|1  
ACGCAACTGATTCGGGTATCAGGACCTTTCAAGAATTGCTGTTCAGAGACCTACAGCTTC  
>HPV8\_Beta\_333074\_nt1921\_Genome\_Tile|1  
TTGAGGAGGCCGACATTGCTTATGGATATGCAAACTAGCCCCAGAAGATGCTAATGCTG  
>HPV8\_Beta\_333074\_nt2081\_Genome\_Tile|1  
TGAGTGGATATATACAAGGATCAATGAGGTTGAAGGAGAGGGGCATTGGTCTTCCATAGT  
>HPV8\_Beta\_333074\_nt2181\_Genome\_Tile|1  
TTAGCTGCCTTAAAAGATTTTTTGCATTCCGTACCTAAGCGAAACTGTTTGTTAATCTAT  
>HPV8\_Beta\_333074\_nt2481\_Genome\_Tile|1  
ATTAAATTTCTCCCCCTTTTGTTAACTTCCAATATTAACCTGCATGAGGAGGCTAACTAT  
>HPV8\_Beta\_333074\_nt3101\_Genome\_Tile|1  
TGTGGAAGCACATTTACTACACTGATGCAGACGATAAGTGGCACAAAACCACAGTGGGG  
>HPV8\_Beta\_333074\_nt3441\_Genome\_Tile|1  
AAGGTACGGGAGACGGCGTCCAGCAGAACAAGACCGCAAAAAGAGCAGAGGCGATCAAG  
>HPV8\_Beta\_333074\_nt4201\_Genome\_Tile|1  
CATTACTAACGCTGCCTTGCTACTAACAACATAATTTCCATTTGCTTTTTACTATA  
>HPV8\_Beta\_333074\_nt4221\_Genome\_Tile|1  
TACTAACACACTAACATATTTCCATTTGCTTTTTACTATATTTTTTAATTGTATACTGCT  
>HPV8\_Beta\_333074\_nt4241\_Genome\_Tile|1  
CCCATTTGCTTTTTACTATATTTTTTAATTGTATACTGCTATGGCGCGTGCTAGACGGGT  
>HPV8\_Beta\_333074\_nt4561\_Genome\_Tile|1  
AAGCGGTAGGTCCTATGGACATACTGCCAATCGACACTATTGACCCTGTAGAGCCTTCAG  
>HPV8\_Beta\_333074\_nt4581\_Genome\_Tile|1  
ATACTGCCAATCGACACTATTGACCCTGTAGAGCCTTCAGTCTCCTCTGTGGTGCCACTC  
>HPV8\_Beta\_333074\_nt4601\_Genome\_Tile|1  
TGACCCTGTAGAGCCTTCAGTCTCCTCTGTGGTGCCACTCACTGAATCTTCAGGAGCCGA  
>HPV8\_Beta\_333074\_nt4761\_Genome\_Tile|1  
GCCATTTTAGAGGTGGCTCCTGAGCCAACCCCTCCTACCCGTGTCAGAGTTTCACGTACA  
>HPV8\_Beta\_333074\_nt4841\_Genome\_Tile|1  
TCAAATCATAACTGATTCCACACCTACACAAGGAGAAAGTTCTCTAGCAGACCACATTTT  
>HPV8\_Beta\_333074\_nt4921\_Genome\_Tile|1  
GCCAGACTATAGGTAGTGACATAACAGATGTCATAGAAGTCAAGAATTTCCCTAGTAGGT  
>HPV8\_Beta\_333074\_nt4941\_Genome\_Tile|1  
ATAACAGATGTCATAGAAGTCAAGAATTTCCCTAGTAGGTATTCATTTGAGATTGATGAA  
>HPV8\_Beta\_333074\_nt5001\_Genome\_Tile|1  
CCTACACCACCACGGCAAAGTAGCACACCTATTGAGAGACCTCAAGTAGTTGGTAGACGT  
>HPV8\_Beta\_333074\_nt5021\_Genome\_Tile|1  
TAGCACACCTATTGAGAGACCTCAAGTAGTTGGTAGACGTAGAGGTATTTCTTTAACAAA  
>HPV8\_Beta\_333074\_nt5101\_Genome\_Tile|1  
TGGCTGTTGAGGATCCTTTGTTTTTATCAAAACCTTCCAAATTAGTAAGGTTCAAGTTTTG  
>HPV8\_Beta\_333074\_nt5161\_Genome\_Tile|1  
ATAATCCTGTATTTGAAGAGGAGGTCATAATATATTTGAGCAAGATGTGGACATGGTCG  
>HPV8\_Beta\_333074\_nt5381\_Genome\_Tile|1  
GGATTTAAGTTCAATCAATACAGAAGATCCTATAGAAGTCCAACTATTAGGTCAACATTC  
>HPV8\_Beta\_333074\_nt5481\_Genome\_Tile|1  
TTTGTAATGTTGATATTTCTGAAAATCCTTTATCTGAAAGTATTCAGGCATTTTCAGAT  
>HPV8\_Beta\_333074\_nt5701\_Genome\_Tile|1

AAAGTCGCAATAATGAGGAAATAATTTACCCTACACCTGATCTTCCGGTGGTAATAATCC  
>HPV8\_Beta\_333074\_nt5721\_Genome\_Tile|1  
ATAATTTACCCTACACCTGATCTTCCGGTGGTAATAATCCACACACATGATAACAGTGGT  
>HPV8\_Beta\_333074\_nt7341\_Genome\_Tile|1  
AAAATCTATATCTAGGGGCTCCGTCAGGGGCACAAAACGAAAACGGAAAAATTAGATTGT  
>HPV66\_Alpha\_1020290\_nt0201\_Genome\_Tile|1  
GTATACTGCAAAAAGGAACTTACAAGTTTAGAGCTATATAGGTTTGCATGTATTGAGTTA  
>HPV66\_Alpha\_1020290\_nt0221\_Genome\_Tile|1  
TACAAGTTTLAGAGCTATATAGGTTTGCATGTATTGAGTTAAACTAGTATATAGAAACAA  
>HPV66\_Alpha\_1020290\_nt1001\_Genome\_Tile|1  
AAAGCGAGGAGGAGAATGAAACAGATACAGATGTAGATGGATTTATAGACAATACACTTA  
>HPV66\_Alpha\_1020290\_nt1261\_Genome\_Tile|1  
ACATTGGAAACATTGGAACATCACAACAGGTAGAATACGAAAAGGGAAATGGGTGCGGG  
>HPV66\_Alpha\_1020290\_nt1361\_Genome\_Tile|1  
AGCACTCGGTATCAAATATGGATATAGATACAAATATGGAACACCAACACACCAATTGC  
>HPV66\_Alpha\_1020290\_nt3141\_Genome\_Tile|1  
ATTATAATGGAGAGTGTGGGTGGTGTAAAGTGTCTCAGGGGTGGATTACAGAGGCATAT  
>HPV66\_Alpha\_1020290\_nt3501\_Genome\_Tile|1  
ACGCACACTGTGTACAACAGACACAGACATCAGTAACAACGCCAACAGTAGAAGTCCAC  
>HPV66\_Alpha\_1020290\_nt3521\_Genome\_Tile|1  
GACACAGACATCAGTAACAACGCCAACAGTAGAAGTCCACGTATCAACACACAAAGCCAC  
>HPV66\_Alpha\_1020290\_nt3941\_Genome\_Tile|1  
ATTGTATTTGGTATATTATGTGTTATTGTAACACTGGGAAAGGTAACGTGTAATCGCCAT  
>HPV66\_Alpha\_1020290\_nt4081\_Genome\_Tile|1  
CCGCTTTTGCTATCTGCATCTTTATTTACAAGTTGTCTTATACTAATTATTTTATTTTGG  
>HPV66\_Alpha\_1020290\_nt4101\_Genome\_Tile|1  
TTTATTTACAAGTTGTCTTATACTAATTATTTTATTTTGGTTTGTGTGGCTACATCATT  
>HPV66\_Alpha\_1020290\_nt4121\_Genome\_Tile|1  
TACTAATTATTTTATTTTGGTTTGTGTGGCTACATCATTTTTTTGATACTTTTATACTGT  
>HPV66\_Alpha\_1020290\_nt4141\_Genome\_Tile|1  
TTTGTGTGGCTACATCATTTTTTTGATACTTTTATACTGTTTTTACTATTTTTTTATATA  
>HPV66\_Alpha\_1020290\_nt4161\_Genome\_Tile|1  
TTTTGATACTTTTATACTGTTTTTACTATTTTTTTTATATACCTACACTGTGTATATATTG  
>HPV66\_Alpha\_1020290\_nt4721\_Genome\_Tile|1  
ACATGTAAGTAGTACTACTATAACAAACCCACTATATATTGATCCTCCAGTAATTGAGGC  
>HPV66\_Alpha\_1020290\_nt4941\_Genome\_Tile|1  
CCCAGGTTATATAGTAGGGCTTTTTCAGCAGGTTAGGGTCACTGACCCAGCATTTTTTGGAC  
>HPV66\_Alpha\_1020290\_nt5761\_Genome\_Tile|1  
AGCTCTAGGTTGCTTGCTGTTGGCCATCCTTATTACTCTGTTTCCAAATCTGGTACCAAA  
>HPV66\_Alpha\_1020290\_nt6121\_Genome\_Tile|1  
GGATGTGCACCAGCATTTAGGGGAACATTGGACTAAGGGCGCGGTGTGTAAGTCTACACCA  
>HPV66\_Alpha\_1020290\_nt6181\_Genome\_Tile|1  
GGTAATACAGGGGATTGTCCACCTCTTGCATTAGTTAATACCCCGATAGAGGACGGTGAC  
>HPV66\_Alpha\_1020290\_nt6441\_Genome\_Tile|1  
TGTTGGGGAAGCCATTCCCTACAGATTTGTATTGGAAGGTGGCAATGGCAGGGACCCTCC  
>HPV66\_Alpha\_1020290\_nt6801\_Genome\_Tile|1  
TATGGCATATTTGCATAATATGAATAATACTTTATTAGACGATTGGAATATTGGCTTATC  
>HPV66\_Alpha\_1020290\_nt6821\_Genome\_Tile|1  
TGAATAAATACTTTATTAGACGATTGGAATATTGGCTTATCCCCACCAGTTGCAACTAGCT  
>HPV66\_Alpha\_1020290\_nt6841\_Genome\_Tile|1  
GATTGGAATATTGGCTTATCCCCACCAGTTGCAACTAGCTTAGAGGATAAATATAGGTAT  
>HPV66\_Alpha\_1020290\_nt7041\_Genome\_Tile|1  
ATTTTTTAATGCAACTAGGCCCTAGACCCCTAGACCCAAGGCTAGTGTATCTGCCTCTAA  
>HPV66\_Alpha\_1020290\_nt7061\_Genome\_Tile|1  
CTAGACCCCTAGACCCAAGGCTAGTGTATCTGCCTCTAAAAGGCGGGCGGCTCCTACCT

>HPV66\_Alpha\_1020290\_nt7081\_Genome\_Tile|1  
GCTAGTGTATCTGCCTCTAAAAGGCGGGCGGCTCCTACCTCTTCTCTTCTTACCAGCT  
>HPV66\_Alpha\_1020290\_nt7141\_Genome\_Tile|1  
AAACGTAAAAAACGATAGTTGTGTGTTGTGTGTTGTATGTATTGTATGGTTGTGCTTGTA  
>HPV66\_Alpha\_1020290\_nt7201\_Genome\_Tile|1  
CTGTATGTTTTTGTGTATGTTTATGTATTTTATAATTGTGTATGTGCTATGTGTATGTAT  
>HPV66\_Alpha\_1020290\_nt7341\_Genome\_Tile|1  
TGCGGTAGTATCCTTGGGCAGTGTGTGTGTCAGGTTAGGTGGTGTTCCTTACTGTTTAATGT  
>HPV66\_Alpha\_1020290\_nt7401\_Genome\_Tile|1  
TATATTAAATAGGTTGTTTGTATGCACTATAGTAACACACCAAACCTCCATTTTAGTGCTG  
>HPV66\_Alpha\_1020290\_nt7661\_Genome\_Tile|1  
CGCTGTTGGGCATATGTTTTTATGCAGGTGTTTGCAATATATTTTGTGGCGTGTAGCCC  
>HPV66\_Alpha\_1020290\_nt7681\_Genome\_Tile|1  
TATGCAGGTGTTTGCATATATTTTGTGGCGTGTAGCCCTTATTGTATAAGCCAAGTAT  
>HPV66\_Alpha\_1020290\_nt7701\_Genome\_Tile|1  
ATTTTGTGGCGTGTAGCCCTTATTGTATAAGCCAAGTATCTGTCTTGCAAATATGTAAC  
>HPV66\_Alpha\_1020290\_nt7721\_Genome\_Tile|1  
TTATTGTATAAGCCAAGTATCTGTCTTGCAAATATGTAACCATATACTTACTCATTTTAC  
>HPV55\_Alpha\_1020266\_nt6481\_Genome\_Tile|1  
CGGTTGGAGAGGACATTCCACAGGATTTGGTTTTTTAAAGGTGCTACTAAAAGTACAGTTC  
>HPV55\_Alpha\_1020266\_nt6701\_Genome\_Tile|1  
AAACATGACAATATGTGCTGCTACAACCTCAGTCTCCATCTACAACATATAATAGTACAGA  
>HPV55\_Alpha\_1020266\_nt6721\_Genome\_Tile|1  
CTACAACCTCAGTCTCCATCTACAACATATAATAGTACAGAATATAAAACAATACATGCGAC  
>HPV55\_Alpha\_1020266\_nt7381\_Genome\_Tile|1  
GTGTTATGTCTGGTGTATACAATATACAACATATGTACAGCCATGTTGTTTTATAAAACA  
>HPV44\_Alpha\_1020242\_nt6481\_Genome\_Tile|1  
CAGTTGGTGAGGACGTTTCCAGGATCTGGTTATTAAAAGTGCTAGTAAAAATACTGTTC  
>HPV44\_Alpha\_1020242\_nt6701\_Genome\_Tile|1  
AAACATGACAATATGTGCTGCCACTACACAGTCCCCTCCGTCTACATATACTAGTGAACA  
>HPV44\_Alpha\_1020242\_nt7381\_Genome\_Tile|1  
TGTTCTATGTTTGGTATATATAATATATAACATATGTACAGCCATGTTAGTTTTTAAACA  
>HPV44\_Alpha\_1020242\_nt7541\_Genome\_Tile|1  
AGCAAGCAAAATATTTAATCATCTCTGCCAGAACTTTATTATGTTACTAAGTACACACCT  
>HPV38\_Beta\_1020234\_nt0061\_Genome\_Tile|1  
TTGGTTTATTATTTCCTGGCAACAATGGTGGTTAACAACCATCACACGTAATCGGTACAAG  
>HPV38\_Beta\_1020234\_nt0141\_Genome\_Tile|1  
ATGAATTAAAAAACAAGGATATATTTAAGGGGCTGTAAAGCTTGGGATGTATTCA  
>HPV38\_Beta\_1020234\_nt0181\_Genome\_Tile|1  
GTAAGCTTGGGATGTATTCATGGAACCTACCAAAACCTCAAACCTGTGCAGCAGCTCAGTGA  
>HPV38\_Beta\_1020234\_nt0201\_Genome\_Tile|1  
TGGAACCTACCAAAACCTCAAACCTGTGCAGCAGCTCAGTGATAAGTTAACAGTTCCTGTAG  
>HPV38\_Beta\_1020234\_nt0221\_Genome\_Tile|1  
ACTGTGCAGCAGCTCAGTGATAAGTTAACAGTTCCTGTAGAGGATCTGTTATTACCCTGT  
>HPV38\_Beta\_1020234\_nt0241\_Genome\_Tile|1  
TAAGTTAACAGTTCCTGTAGAGGATCTGTTATTACCCTGTAGATTCTGCAACAGTTTCCT  
>HPV38\_Beta\_1020234\_nt0281\_Genome\_Tile|1  
AGATTCTGCAACAGTTTCCTCACGTACATTGAATTACGTGAGTTTGATTACAAGAACTTA  
>HPV38\_Beta\_1020234\_nt0301\_Genome\_Tile|1  
CACGTACATTGAATTACGTGAGTTTGATTACAAGAACTTACAGTTAATCTGGACTCAAGA  
>HPV38\_Beta\_1020234\_nt0401\_Genome\_Tile|1  
TCTGCTCAATATGAATGTCAGCAGTTTTATGAATTAACCTGTCTTTGGCCGTGAAATTGAA  
>HPV38\_Beta\_1020234\_nt0421\_Genome\_Tile|1  
GCAGTTTTATGAATTAACCTGTCTTTGGCCGTGAAATTGAACAGGTGGAGCAACAGACAAT  
>HPV38\_Beta\_1020234\_nt0721\_Genome\_Tile|1

GATATTGAAGCATCAGTGGTAGAGGAGGAGCCAGCATACACCCCATACAAAATCATAGTT  
>HPV38\_Beta\_1020234\_nt0761\_Genome\_Tile|1  
CCCCATACAAAATCATAGTTCTTTGTGGGGTTGTGAAGTAAGGCTAAAACTATACGTGT  
>HPV38\_Beta\_1020234\_nt1341\_Genome\_Tile|1  
AGGGTGATATAGGGCTGGGTACTGTAAGAGATCTTTTAAGGAGCAGTAACAGCAGAGCAA  
>HPV38\_Beta\_1020234\_nt1361\_Genome\_Tile|1  
ACTGTAAGAGATCTTTTAAGGAGCAGTAACAGCAGAGCAACACTGTTAAGCAAATTTAAA  
>HPV38\_Beta\_1020234\_nt1641\_Genome\_Tile|1  
TTGTAAGACTAATAGCTACATTATTACAGGTGCATGAAAATCATATATTGTCAGAGCCAC  
>HPV38\_Beta\_1020234\_nt1741\_Genome\_Tile|1  
AGGAAGTTTGAATAGTAATGTGTTTTGTTTTGGTGAAGCTCCTGATTGGATTCTATCACA  
>HPV38\_Beta\_1020234\_nt1961\_Genome\_Tile|1  
AACAGCCAAGTTAAATATGTTAAAGAGTGTGCTTTAATGGTAAGATATTATAAAAGAGGA  
>HPV38\_Beta\_1020234\_nt2041\_Genome\_Tile|1  
TTCTGCTTGGATTTCATCACTGCATATCTAAAGTTGAAGGAGAAGGCAATTGGCAGCATAT  
>HPV38\_Beta\_1020234\_nt2061\_Genome\_Tile|1  
GCATATCTAAAGTTGAAGGAGAAGGCAATTGGCAGCATATTGTTAGGTTTATTAGATACC  
>HPV38\_Beta\_1020234\_nt2081\_Genome\_Tile|1  
GAAGGCAATTGGCAGCATATTGTTAGGTTTATTAGATACCAAATTTGAATTTTATTATG  
>HPV38\_Beta\_1020234\_nt2101\_Genome\_Tile|1  
TGTTAGGTTTATTAGATACCAAATTTGAATTTTATTATGTTTCTAGATAAGTTTCGGAC  
>HPV38\_Beta\_1020234\_nt2221\_Genome\_Tile|1  
AAAGTCTATGTTTGCAATGTCACTTATTAAACTATTGAAAGGTAGTGTAGTATCTTTTGC  
>HPV38\_Beta\_1020234\_nt2241\_Genome\_Tile|1  
CACTTATTAACTATTGAAAGGTAGTGTAGTATCTTTTGCTAATTCGAAAAGTCAATTTT  
>HPV38\_Beta\_1020234\_nt2461\_Genome\_Tile|1  
AATTATTACTTCCAATATTAATTTATTAAAAGAGGAACGATACAGATTTTACACAGTAG  
>HPV38\_Beta\_1020234\_nt2481\_Genome\_Tile|1  
ATTTATTAAAAGAGGAACGATACAGATTTTACACAGTAGAGTAACACAAATTGATTTTC  
>HPV38\_Beta\_1020234\_nt2741\_Genome\_Tile|1  
CCTGGATACACAAATTCAGCATTGGCAGCTTTTAAGACAAGAGCAAATTATTTATCACTA  
>HPV38\_Beta\_1020234\_nt2781\_Genome\_Tile|1  
GAGCAAATTATTTATCACTATGCAAGGAGACATGGTGTACTCGATTGGGCTATCAACCT  
>HPV38\_Beta\_1020234\_nt2841\_Genome\_Tile|1  
GTACCTTCTTTGGCAAGTTTCAGAAGCCAAAGCAAAGATGCCATTTCTATGGTCCTTTTA  
>HPV38\_Beta\_1020234\_nt2861\_Genome\_Tile|1  
AGAAGCCAAAGCAAAGATGCCATTTCTATGGTCCTTTTACTTGAAAGCCTGAAAAATC  
>HPV38\_Beta\_1020234\_nt2881\_Genome\_Tile|1  
CCATTTCTATGGTCCTTTTACTTGAAAGCCTGAAAAATCCAAATATGCAGATGAACAAT  
>HPV38\_Beta\_1020234\_nt2921\_Genome\_Tile|1  
CAAATATGCAGATGAACAATGGACATTAGCTCAAAGCTAGCCTGGAGGCTGTTCGCAGCCC  
>HPV38\_Beta\_1020234\_nt3061\_Genome\_Tile|1  
CTGTGTGGACATATATATATTACCTGACAGATGAGGACATATGGGAAAAAGTGAAGGCC  
>HPV38\_Beta\_1020234\_nt3141\_Genome\_Tile|1  
TATTATTATGAGGGCAAATTAAAGGTGTATTATTTAAATTTGAAAATGATGCTAAACGA  
>HPV38\_Beta\_1020234\_nt3401\_Genome\_Tile|1  
AACCACCTCCCGCAGGCAAAGGAAAGGACAAAGAGAAACCACAGGCACCCAAAGGAGAAG  
>HPV38\_Beta\_1020234\_nt3461\_Genome\_Tile|1  
AAAAAGCAGATCAAGGTCCCGAAGCACCAACAGGGGAGGGAGGGACACCCGGCGATCCTC  
>HPV38\_Beta\_1020234\_nt3801\_Genome\_Tile|1  
AAAAAACATGCTGGTGGCTTTTCGCTTTGTTAGCACAAACATGGTCATGGATAGGAGATGCA  
>HPV38\_Beta\_1020234\_nt3841\_Genome\_Tile|1  
GGTCATGGATAGGAGATGCATCAAATGATCGCATAGGGCGCTCACGAATGCTTCTAGCTT  
>HPV38\_Beta\_1020234\_nt3881\_Genome\_Tile|1  
CTCACGAATGCTTCTAGCTTTTTTATTCAGAATCACAAAGAGAAAAGTTTATACAGACTAT

>HPV38\_Beta\_1020234\_nt3961\_Genome\_Tile|1  
AGTGGTCATTAGGACAATTTGATGATTTATAGAATAATCTATAAGAGATATTTTTTATAT  
>HPV38\_Beta\_1020234\_nt4521\_Genome\_Tile|1  
CTGTTGTGAGTGGAGGCCGCAATACCAATGCTATATTGGAAGTGGCTGACCCTCATCCAC  
>HPV38\_Beta\_1020234\_nt4541\_Genome\_Tile|1  
AATACCAATGCTATATTGGAAGTGGCTGACCCTCATCCACCCACTAGAGCTACTGTTAGC  
>HPV38\_Beta\_1020234\_nt4581\_Genome\_Tile|1  
CCACTAGAGCTACTGTTAGCAGAACTCAATATAATAATCCTGCTTTCCAAATAATTTCTG  
>HPV38\_Beta\_1020234\_nt4601\_Genome\_Tile|1  
AGAACTCAATATAATAATCCTGCTTTCCAAATAATTTCTGAAGTAATCCCTACCTCTGGA  
>HPV38\_Beta\_1020234\_nt4641\_Genome\_Tile|1  
AAGTAATCCCTACCTCTGGAGAGTCTTCTCTTGCAGATCACGTGTTAGTGTCTGAAGGGT  
>HPV38\_Beta\_1020234\_nt4681\_Genome\_Tile|1  
CGTGTTAGTGTCTGAAGGGTCTGGTGGCCAGCAGATAGGAGGTACCAGAACAGCAGAAGA  
>HPV38\_Beta\_1020234\_nt4801\_Genome\_Tile|1  
GCGAAGAACTAGCACCCCTTACAAAGAGCAAGACAACAGTTTTTCATCATTACGCAGAGC  
>HPV38\_Beta\_1020234\_nt4821\_Genome\_Tile|1  
TACAAAGAGCAAGACAACAGTTTTTCATCATTACGCAGAGCATTATATAATAGAAGGCTAA  
>HPV38\_Beta\_1020234\_nt4841\_Genome\_Tile|1  
TTTTTCATCATTACGCAGAGCATTATATAATAGAAGGCTAACTGAGCAAGTGGGTGTCACT  
>HPV38\_Beta\_1020234\_nt4861\_Genome\_Tile|1  
ATTATATAATAGAAGGCTAACTGAGCAAGTGGGTGTCACTGACCCTTTATTTTTTCACATC  
>HPV38\_Beta\_1020234\_nt4881\_Genome\_Tile|1  
CTGAGCAAGTGGGTGTCACTGACCCTTTATTTTTTCACATCACCTTCCAAATTGGTGCGTT  
>HPV38\_Beta\_1020234\_nt5041\_Genome\_Tile|1  
GGTTAAATTAGGTAGGCCAACATTAAGTCTGCAGAGGGATATGTTAGAGTGAGTCG  
>HPV38\_Beta\_1020234\_nt5061\_Genome\_Tile|1  
CATTAAGTCTGCAGAGGGATATGTTAGAGTGAGTCGTTTGGGAAGACGGGGAACGA  
>HPV38\_Beta\_1020234\_nt5081\_Genome\_Tile|1  
GGATATGTTAGAGTGAGTCGTTTGGGAAGACGGGGAACGATCCGAACACGCAGTGGTACA  
>HPV38\_Beta\_1020234\_nt5101\_Genome\_Tile|1  
TTTGGGAAGACGGGGAACGATCCGAACACGCAGTGGTACACAAATAGGATCACAAAGTACA  
>HPV38\_Beta\_1020234\_nt5281\_Genome\_Tile|1  
AAATGTGACTGAGGTTCTGAAGGTGTTCTTACAGAACTTCTATGGATCCAGATACTTT  
>HPV38\_Beta\_1020234\_nt5301\_Genome\_Tile|1  
AAGGTGTTCTTACAGAACTTCTATGGATCCAGATACTTTTAATTCAGAGGATTTATTAC  
>HPV38\_Beta\_1020234\_nt5321\_Genome\_Tile|1  
TCTATGGATCCAGATACTTTTAATTCAGAGGATTTATTACTGGATGATGCTATAGAAGAC  
>HPV38\_Beta\_1020234\_nt5381\_Genome\_Tile|1  
TTCAGCGGATCTCAGTTAGTTGTAGGAACTCCACGCAGATCCACTACGTCAATCACTGTA  
>HPV38\_Beta\_1020234\_nt5401\_Genome\_Tile|1  
TGTAGGAATCCACGCAGATCCACTACGTCAATCACTGTACCTAGATTTACAGACTCCTCA  
>HPV38\_Beta\_1020234\_nt5421\_Genome\_Tile|1  
CCACTACGTCAATCACTGTACCTAGATTTACAGACTCCTCAAAATCCTACCATATATTATC  
>HPV38\_Beta\_1020234\_nt5441\_Genome\_Tile|1  
CCTAGATTTACAGACTCCTCAAAATCCTACCATATATTATCAGGATATACAGGGGTATCAT  
>HPV38\_Beta\_1020234\_nt5461\_Genome\_Tile|1  
AAATCCTACCATATATTATCAGGATATACAGGGGTATCATGTTTCATATCCCGAAAGCAG  
>HPV38\_Beta\_1020234\_nt5481\_Genome\_Tile|1  
AGGATATACAGGGGTATCATGTTTCATATCCCGAAAGCAGAGAAAGACCCGCCATTATTT  
>HPV38\_Beta\_1020234\_nt5501\_Genome\_Tile|1  
GTTTCATATCCCGAAAGCAGAGAAAGACCCGCCATTATTTATCCTACACCCGATATTCCT  
>HPV38\_Beta\_1020234\_nt5541\_Genome\_Tile|1  
ATCCTACACCCGATATTCCTACAGTAGTTATACATGTTGCTGATTCTCTGGAGATTTTT  
>HPV38\_Beta\_1020234\_nt7141\_Genome\_Tile|1

GGCCGTTAGTAAGAAAATCTTCCAAATCTGTAAACGCAAAGGACCCAGTAACCGTTTT  
>HPV37\_Beta\_1020226\_nt0161\_Genome\_Tile|1  
GATCTAAATAAATATGATGAGCAATACTTAAGAGAATATATGGCTAGGCCTAAGCCTCAA  
>HPV37\_Beta\_1020226\_nt0381\_Genome\_Tile|1  
GTACTAGCTGTGCCTATGCTACAGCACAGTTTGAATTTACCAGTTTCTATGAGCACTCAG  
>HPV37\_Beta\_1020226\_nt0401\_Genome\_Tile|1  
ACAGCACAGTTTGAATTTACCAGTTTCTATGAGCACTCAGTTAGTGGGAGGGAGATAGAA  
>HPV37\_Beta\_1020226\_nt0501\_Genome\_Tile|1  
GCAAATTTTGCTTAAAGTTATTGGATTTGTTAGAGAAGTTGGAGACTTGCTATACTCAGC  
>HPV37\_Beta\_1020226\_nt0821\_Genome\_Tile|1  
TTGGAATTAGATCACAAGAAGAGCTATTACTTGGTGAAGTGCAGCTGGTTTGTCCAAACT  
>HPV37\_Beta\_1020226\_nt2121\_Genome\_Tile|1  
TCCAAGATATCAATTTTATAAGGTTTCTAGATGTCTTTAAATCATTTTTGCATAACACTC  
>HPV37\_Beta\_1020226\_nt2141\_Genome\_Tile|1  
AGGTTTCTAGATGTCTTTAAATCATTTTTGCATAACACTCCTAAAAAGAATTGTCTTTTA  
>HPV37\_Beta\_1020226\_nt2301\_Genome\_Tile|1  
TTTGGTTGCAGCCGTTGGCAGATACTAAATTGCTTTAATAGATGACGTCACGCATGTGT  
>HPV37\_Beta\_1020226\_nt2741\_Genome\_Tile|1  
TGACCTAGAGACCCAAATTATGCATTGGCAACTTCTAAGGCAGGAGCAGATCCTGTTTCA  
>HPV37\_Beta\_1020226\_nt2901\_Genome\_Tile|1  
TTATTAGAAAGTTTACAACAGTCTGCTTATGGTAAAGAGTCTGGACACTTACACAAACT  
>HPV37\_Beta\_1020226\_nt3281\_Genome\_Tile|1  
AGCTGGAGAAGGGACAGACGGGGCAGCCTCCGTCCACACCGTATCCGGGTCGCCGCTCGC  
>HPV37\_Beta\_1020226\_nt3821\_Genome\_Tile|1  
ATGCTATCGCTATAGAGCTAAGAAAAAGCATGGAAACCTAGTTAAGTACTACAGTACCAC  
>HPV37\_Beta\_1020226\_nt3921\_Genome\_Tile|1  
AGGTCACGCATGTTACTTGCATTTCAATCCAATACAGAAAGAGAGTTGTTTTTAAAAACT  
>HPV37\_Beta\_1020226\_nt3941\_Genome\_Tile|1  
ATTTCAATCCAATACAGAAAGAGAGTTGTTTTTAAAAACTATGAAATTACCACCAGGAGT  
>HPV37\_Beta\_1020226\_nt4001\_Genome\_Tile|1  
TGATTGGTCACTGGGTCATTTAGATGAATTGTGAAAACAGCTTTTTTTATAACAACTAAC  
>HPV37\_Beta\_1020226\_nt4021\_Genome\_Tile|1  
TAGATGAATTGTGAAAACAGCTTTTTTTATAACAACTAACATTGCTTTTGCTTTTGCTAC  
>HPV37\_Beta\_1020226\_nt4041\_Genome\_Tile|1  
CTTTTTTTATAACAACTAACATTGCTTTTGCTTTTGCTACTAACCTACTAACGTTCCAAT  
>HPV37\_Beta\_1020226\_nt4921\_Genome\_Tile|1  
AGATTAACAGAACAGGTAGCAGTCACGGATCCTTTATTCTTGAGTAGACCCTCACAATTA  
>HPV37\_Beta\_1020226\_nt4941\_Genome\_Tile|1  
AGTCACGGATCCTTTATTCTTGAGTAGACCCTCACAATTAGTACAGTTTCAGTTTGACAA  
>HPV37\_Beta\_1020226\_nt5101\_Genome\_Tile|1  
AGACCTACTGTTGCTGAAACACCACAAGCGTATTTAAGAGTAAGCAGATTAGGACGTCGT  
>HPV37\_Beta\_1020226\_nt5121\_Genome\_Tile|1  
ACCACAAGCGTATTTAAGAGTAAGCAGATTAGGACGTCGTGCTACCATCCGTACTCGTAG  
>HPV37\_Beta\_1020226\_nt5301\_Genome\_Tile|1  
TGTAGAAAGTTCATTTGTTGATATAAATATTGATGAACCAGGTCCCTTAAATATAGGGCA  
>HPV37\_Beta\_1020226\_nt5321\_Genome\_Tile|1  
ATATAAATATTGATGAACCAGGTCCCTTAAATATAGGGCAACAAGAGTCTACTATGGCAG  
>HPV37\_Beta\_1020226\_nt5341\_Genome\_Tile|1  
GGTCCCTTAAATATAGGGCAACAAGAGTCTACTATGGCAGATGACACAGATTTTAATTCT  
>HPV37\_Beta\_1020226\_nt5361\_Genome\_Tile|1  
ACAAGAGTCTACTATGGCAGATGACACAGATTTTAATTCTGCAGATTTATTGTTAGAGGA  
>HPV37\_Beta\_1020226\_nt5441\_Genome\_Tile|1  
GATCTCAGTTGGTTTTTTGGAACCTCACGCCGAGTACAAATTCTATCACAATACCTAGAT  
>HPV37\_Beta\_1020226\_nt5521\_Genome\_Tile|1  
GGATTTTATATACAAGATATTCAAGGTTACAATGTAGCCTATCCTGAGTCACGTGACACA



>HPV37\_Beta\_1020226\_nt5541\_Genome\_Tile|1  
TCAAGGTTACAATGTAGCCTATCCTGAGTCACGTGACACAACACAAGTTATCTTGCCACA  
>HPV36\_Beta\_1020218\_nt0121\_Genome\_Tile|1  
ATATACTGTATAGTATAAATAAATAAATAAATATATATATATATGCTTCAAAGGTTGGGT  
>HPV36\_Beta\_1020218\_nt0141\_Genome\_Tile|1  
AAATAAATAAATATATATATATATGCTTCAAAGGTTGGGTTTTTTAATAATTAAGGCAAA  
>HPV36\_Beta\_1020218\_nt0161\_Genome\_Tile|1  
ATATGCTTCAAAGGTTGGGTTTTTTAATAATTAAGGCAAATGGCAGAGCAAGCCTCCGAA  
>HPV36\_Beta\_1020218\_nt0181\_Genome\_Tile|1  
TTTTTAATAATTAAGGCAAATGGCAGAGCAAGCCTCCGAACAGCAGAATATTACAGAAAA  
>HPV36\_Beta\_1020218\_nt0201\_Genome\_Tile|1  
TGGCAGAGCAAGCCTCCGAACAGCAGAATATTACAGAAAAAGAAAAAGAACAGCTGCCTT  
>HPV36\_Beta\_1020218\_nt0281\_Genome\_Tile|1  
GAATCATTTAGGCATTCCTGTTGTAGACTGTCTAATACCTTGTAACCTTTGTGGCAAATTT  
>HPV36\_Beta\_1020218\_nt0501\_Genome\_Tile|1  
TGGCTGCAGGTCGCTCCATATTTGAAATTGACATTAGGTGTCAGACGTGCTTAGCTTTTC  
>HPV36\_Beta\_1020218\_nt2061\_Genome\_Tile|1  
AAAAGGTCAAATGAGGGATATGTCCATGTTCGGAATGGATCTATACTAAAATACATGAGGT  
>HPV36\_Beta\_1020218\_nt2381\_Genome\_Tile|1  
TGATTGATGATGTAACGTACCCCTGTTGGTTATATATGGATAAATTATCTAAGAAACGGTT  
>HPV36\_Beta\_1020218\_nt2401\_Genome\_Tile|1  
CCCTGTTGGTTATATATGGATAATTATCTAAGAAACGGTTTAGATGGGCATTATGTCTCA  
>HPV36\_Beta\_1020218\_nt2421\_Genome\_Tile|1  
TAATTATCTAAGAAACGGTTTAGATGGGCATTATGTCTCATTGGATTGTAAATACAAAGC  
>HPV36\_Beta\_1020218\_nt2961\_Genome\_Tile|1  
AAACGTCTGAATATGCATCTGAAACTTGGACATTAGTTGACACCAGTATAGAACTTTTA  
>HPV36\_Beta\_1020218\_nt3101\_Genome\_Tile|1  
TTGTACACTATGTGGACATACGTGTATTATATGGAAGACGATGTGTGGCATAAAGCCAGA  
>HPV36\_Beta\_1020218\_nt3621\_Genome\_Tile|1  
AGACTGGGGTCCAGCGGTATCAACCAGATCACGATCCAGAAGCACCTCTAGAAGGGGAG  
>HPV36\_Beta\_1020218\_nt3641\_Genome\_Tile|1  
TCAACCAGATCACGATCCAGAAGCACCTCTAGAAGGGGAGGTAGAAGGCGGAGGTCACGG  
>HPV36\_Beta\_1020218\_nt4201\_Genome\_Tile|1  
GAAAGGAGTTGAAAAATCATATGGCAACCTTGACAGTCTCTAACCCTAATGCTATGCTG  
>HPV36\_Beta\_1020218\_nt4241\_Genome\_Tile|1  
TAACCCTAATGCTATGCTGCTTTGCTACTAACAACCTAACAATTAGCTTTTTTATACT  
>HPV36\_Beta\_1020218\_nt4261\_Genome\_Tile|1  
CTTTGCTACTAACAACCTAACAATTAGCTTTTTTATACTTTTTTACTTTTGTACCTGCA  
>HPV36\_Beta\_1020218\_nt4281\_Genome\_Tile|1  
ACAAATTAGCTTTTTTATACTTTTTTACTTTTGTACCTGCAATGGCGCGTGCTAAAAGGGT  
>HPV36\_Beta\_1020218\_nt4941\_Genome\_Tile|1  
AGTGACATCAGGGTCCGGGGGACAAAGAATAGGGGCTGATATTACTGATGAAATTGAACT  
>HPV36\_Beta\_1020218\_nt4961\_Genome\_Tile|1  
GACAAAGAATAGGGGCTGATATTACTGATGAAATTGAACTTCAAGAACTTCCTAGTAGAT  
>HPV36\_Beta\_1020218\_nt5021\_Genome\_Tile|1  
ATACTTTTGAAAAATGAAGAACCAACTCCACCTAGACGTAGCAGCACACCTTTACAGGCCA  
>HPV36\_Beta\_1020218\_nt5041\_Genome\_Tile|1  
CCAACCTCCACCTAGACGTAGCAGCACACCTTTACAGGCCACACGAGCTGCAGGTAGACGG  
>HPV36\_Beta\_1020218\_nt5061\_Genome\_Tile|1  
CAGCACACCTTTACAGGCCACACGAGCTGCAGGTAGACGGAGAGGTGTTTCTTTAACTAA  
>HPV36\_Beta\_1020218\_nt5301\_Genome\_Tile|1  
GGGTGCTCCCAATATTCTACAACCTCCTGCAGGGTATGTGAGGGTTAGTAGATTAGGTAC  
>HPV36\_Beta\_1020218\_nt5321\_Genome\_Tile|1  
CAACTCCTGCAGGGTATGTGAGGGTTAGTAGATTAGGTACTCGTGCAACCATTTCGCACGC  
>HPV36\_Beta\_1020218\_nt5521\_Genome\_Tile|1

TTTATAGACGTAAATGTGTCTGAAAATCCTTTGTCTGAAAGTGTGGAAGCCTTTTCTGAT  
>HPV36\_Beta\_1020218\_nt5681\_Genome\_Tile|1  
CTACTAGGAGTGGTTCTTATTATGTCCAGGACAGTAAAGGATATTATGTTGCATACCCAG  
>HPV36\_Beta\_1020218\_nt7401\_Genome\_Tile|1  
GAGGGTTCACCAGAGGAACCAAGCGCAAGCGAAAACAGTAATATGACCGTTTTTGGTACA  
>HPV36\_Beta\_1020218\_nt7561\_Genome\_Tile|1  
CTGCTGCCAATATAGACTCTGTTTAGTGCCAGAACATATCATCTTGAAGCAGATCGACC  
>HPV36\_Beta\_1020218\_nt7661\_Genome\_Tile|1  
GAAGATTTAATCTACAATCGCTGTTGGCAATCGCTTTTGGCTGAGATAGCTGACCGGTAA  
>HPV29\_Alpha\_1020210\_nt1261\_Genome\_Tile|1  
TTGCGAGACGGGTGATCAAAATGGCCGACAGCAGTATAAGGAGGGGAGTGGTACAAAGGA  
>HPV29\_Alpha\_1020210\_nt1861\_Genome\_Tile|1  
ACAGACAATGGTAGGTCACGCATTACAAGAAGTACAGTTCAGTTTATCTGAAATGGTACA  
>HPV29\_Alpha\_1020210\_nt3881\_Genome\_Tile|1  
GTCTGTGTTTTGACTACTGTGCCACAACGTGTAGCAGCCTGGATTTTTATCTGTGTCGAC  
>HPV29\_Alpha\_1020210\_nt4001\_Genome\_Tile|1  
CGCTTACTTGCTACTTGGCCATTGTGTTGTGTTTATACCTAGGATTGGTGGCACTATATT  
>HPV29\_Alpha\_1020210\_nt4041\_Genome\_Tile|1  
AGGATTGGTGGCACTATATTTACAAGTTGTGCAGCACATTGCACGAAACACTTAGGCTAT  
>HPV29\_Alpha\_1020210\_nt4061\_Genome\_Tile|1  
TACAAGTTGTGCAGCACATTGCACGAAACACTTAGGCTATCATGTATCCTATAATAATTA  
>HPV29\_Alpha\_1020210\_nt4161\_Genome\_Tile|1  
AAGGGACGTGTATGTGTTGGGATTGTTAATACTAATGGTATGCCTGTTGTTATTTATAGT  
>HPV29\_Alpha\_1020210\_nt4281\_Genome\_Tile|1  
TTTTATATGTGGCTGTGGTAATACGTGTATTGTATACATGGCCATACAATTGTGCATGTG  
>HPV29\_Alpha\_1020210\_nt4301\_Genome\_Tile|1  
ATACGTGTATTGTATACATGGCCATACAATTGTGCATGTGTTTTTAAAGTTCTACCACTT  
>HPV29\_Alpha\_1020210\_nt4321\_Genome\_Tile|1  
GCCATACAATTGTGCATGTGTTTTTAAAGTTCTACCACTTTTTTTGTGTTTTTTGTGTT  
>HPV29\_Alpha\_1020210\_nt4341\_Genome\_Tile|1  
TTTTTAAAGTTCTACCACTTTTTTTGTGTTTTTTGTGTTTCCTTTGTTTTTACAGTTCAA  
>HPV29\_Alpha\_1020210\_nt4881\_Genome\_Tile|1  
CTTTAATAATCCTTTATTACCGAGCCTTCACTCTTGGAATTCACAAACTGGAGAAAC  
>HPV29\_Alpha\_1020210\_nt5601\_Genome\_Tile|1  
CACTATTCCATTTCGTGTCGCCAGTTGATGTGCCTTTACACACGGGCCCTGATATTATTCT  
>HPV29\_Alpha\_1020210\_nt6581\_Genome\_Tile|1  
GCCAGGCACTTCTTTAATCGTGCTGGTGTAGTAGGGGACAAAATCCCAGATTCTTGTAC  
>HPV29\_Alpha\_1020210\_nt6621\_Genome\_Tile|1  
AAATCCCAGATTCTTGTACTTAAAGGGTAACAACGGGCGAGAAACTCCTGGCAGTGCCA  
>HPV29\_Alpha\_1020210\_nt6841\_Genome\_Tile|1  
GTTGTGTGCTACCACAGAGTCTCAACCGTTGACCACTTATGATGCTACCAAGATTAAAGA  
>HPV29\_Alpha\_1020210\_nt6861\_Genome\_Tile|1  
CTCAACCGTTGACCACTTATGATGCTACCAAGATTAAAGAATATTTGAGACATGGGGAGG  
>HPV29\_Alpha\_1020210\_nt6981\_Genome\_Tile|1  
CTTACCTTCATACTATGAACAGTGCCTTACTTGAAGACTGGAATTTTGGATTGACATTGC  
>HPV29\_Alpha\_1020210\_nt7221\_Genome\_Tile|1  
TATTACAGATCGGTGCGCGCCGGCGTTTCACTAGTCCCCTCCAGAAAGCGCCGAACGACCA  
>HPV29\_Alpha\_1020210\_nt7261\_Genome\_Tile|1  
CAGAAAGCGCCGAACGACCACGCCCCCACCCTGCAAAGCGAAACGCTCGAAAAA  
>HPV29\_Alpha\_1020210\_nt7341\_Genome\_Tile|1  
TGCTGTATGTTGTGTAATGTAATGTGTGTATGTATTTATTACCATATGTGTTTGTATGTC  
>HPV29\_Alpha\_1020210\_nt7481\_Genome\_Tile|1  
TATTTTATACATATAATTGTTTGTGAGTAAGAAGTTAAGGTATAGGTCAGGGGACCGAT  
>HPV28\_Alpha\_1020202\_nt0081\_Genome\_Tile|1  
ACATTGAATGGCAGAAGCTCAATGGATGACCAACGGCCTAAAAACATATTCCTATTGTGC

>HPV28\_Alpha\_1020202\_nt0141\_Genome\_Tile|1  
AGAGACAGTGGAAATATCATTTGATGACCTCCGTTTGCCTGTCATATTCTGCGCCAAAGTG  
>HPV28\_Alpha\_1020202\_nt0161\_Genome\_Tile|1  
TGATGACCTCCGTTTGCCTGTCATATTCTGCGCCAAAGTGCTGACCACAGCGGAGCTATC  
>HPV28\_Alpha\_1020202\_nt2281\_Genome\_Tile|1  
TTTCTGTCATGAGTCTATTAAGATTTCTAGGTGGGGTGGTAATATCTTATGCCAATTCAAA  
>HPV28\_Alpha\_1020202\_nt3801\_Genome\_Tile|1  
CCACCTGGTATACAGGTAATATTGGGACATATGTCAATGTTTGTATAATTATCGAACCGT  
>HPV28\_Alpha\_1020202\_nt3821\_Genome\_Tile|1  
ATTGGGACATATGTCAATGTTTGTATAATTATCGAACCGTGTGGTGATACAGTGTGCAGA  
>HPV28\_Alpha\_1020202\_nt4021\_Genome\_Tile|1  
TTTGCGAATTGTATCACATATTGTACAAATCAATACATAAGCCTTGCTATGTATCCTTTG  
>HPV28\_Alpha\_1020202\_nt4041\_Genome\_Tile|1  
TTGTACAAATCAATACATAAGCCTTGCTATGTATCCTTTGGTGCTAAGGGACAACAATGG  
>HPV28\_Alpha\_1020202\_nt4101\_Genome\_Tile|1  
CGATCATACTGTCCGTGTTTCTGGAGCCAGATGACGTGTATCTATTGTTGTTGTTTATATT  
>HPV28\_Alpha\_1020202\_nt4161\_Genome\_Tile|1  
TTTTGTTATACTTGCATTGTTTATCTTGTATAGACATTTGGGTTTTTTGTAACTGTGTAG  
>HPV28\_Alpha\_1020202\_nt4181\_Genome\_Tile|1  
TTATCTTGTATAGACATTTGGGTTTTTTGTAACTGTGTAGTTGTGTGTTAGTTGGTCACC  
>HPV28\_Alpha\_1020202\_nt4201\_Genome\_Tile|1  
GGTTTTTTGTAACTGTGTAGTTGTGTGTTAGTTGGTCACCACAATGTATTTTTTAAGTACT  
>HPV28\_Alpha\_1020202\_nt4221\_Genome\_Tile|1  
TTGTGTGTTAGTTGGTCACCACAATGTATTTTTTAAGTACTGTGTATATCCCAGTGTGCTA  
>HPV28\_Alpha\_1020202\_nt4261\_Genome\_Tile|1  
GTGTATATCCCAGTGTGCTATTGAGCCACTGCCTTTTCTACACTTGTTTTTTTTTTTTTAC  
>HPV28\_Alpha\_1020202\_nt4781\_Genome\_Tile|1  
TGACAATGTGGTCATTAGTAGTTCCAACCTTACCAACCCTGCCTTTACTGAACCCTCGTT  
>HPV28\_Alpha\_1020202\_nt4801\_Genome\_Tile|1  
GTTCCAACCTTACCAACCCTGCCTTTACTGAACCCTCGTTGTTAGAGGTCCCCAAAATG  
>HPV28\_Alpha\_1020202\_nt5341\_Genome\_Tile|1  
ACATTGAAATGGAGCCTTTGCTTGCTCCTGCTGAAAACGCTGCTGGGGATTCTATTTATG  
>HPV28\_Alpha\_1020202\_nt5421\_Genome\_Tile|1  
GACGCTGACATAGCTTTTACTGGTAGAAGTCGCAGCGCCACGTCATCTCGGGGATACACT  
>HPV28\_Alpha\_1020202\_nt5441\_Genome\_Tile|1  
TGGTAGAAGTCGCAGCGCCACGTCATCTCGGGGATACACTACGGTGTCCCCACTGTCTTC  
>HPV28\_Alpha\_1020202\_nt5461\_Genome\_Tile|1  
CGTCATCTCGGGGATACACTACGGTGTCCCCACTGTCTTCCACACTAACTACCAAGTATG  
>HPV28\_Alpha\_1020202\_nt5881\_Genome\_Tile|1  
CCTTATTTTCCCATTCCCTAAATCATCCACTAACAAAGCAGATGTGCCCCAAAGTGTCCGCC  
>HPV28\_Alpha\_1020202\_nt5901\_Genome\_Tile|1  
ATCATCCACTAACAAAGCAGATGTGCCCCAAAGTGTCCGCCTTTCAGTATAGGGTATTCCG  
>HPV28\_Alpha\_1020202\_nt6521\_Genome\_Tile|1  
ATAGAGCTGGTGTGCTGGGGACACCATTCCTGAAACATTGTATATTAAAGGTCAGGGCA  
>HPV28\_Alpha\_1020202\_nt6541\_Genome\_Tile|1  
GACACCATTCCTGAAACATTGTATATTAAAGGTCAGGGCAACGGGAGGGATGTGATTGGT  
>HPV28\_Alpha\_1020202\_nt7101\_Genome\_Tile|1  
TTCTCTTGATCTATCGCAATTCCCTCTGGGAAGGAAATTTTTAATGCAGTTGGGTGTAGG  
>HPV28\_Alpha\_1020202\_nt7241\_Genome\_Tile|1  
AAAAGTAGCACTACTGTGTTTTGTATGTTTGCCTGTTGTTGTCTGTGTGTCAGTGTATG  
>HPV28\_Alpha\_1020202\_nt7281\_Genome\_Tile|1  
GTCCTGTGTGTCAGTGTATGGGCGTCCCTGATATGTGTTTGTACAAAGTATGGTGTATGT  
>HPV28\_Alpha\_1020202\_nt7341\_Genome\_Tile|1  
ATTTGTGTATGCATGTAATGTGGTTATAACTGTGTTTTGTATGTTTGCTGTTGTTGTCC  
>HPV28\_Alpha\_1020202\_nt7381\_Genome\_Tile|1

ATGTTTGCCTGTTGTTGTCCTGTGTGTCAGTGTGTGGGCGTCCTGCTATGTGCTTGTACA  
>HPV28\_Alpha\_1020202\_nt7401\_Genome\_Tile|1  
TGTGTGTCAGTGTGTGGGCGTCCTGCTATGTGCTTGTACAAAGTATGGTGTATGTATTTG  
>HPV28\_Alpha\_1020202\_nt7661\_Genome\_Tile|1  
CTGCAAACCTGCCCTGTCTCGCAAGTTTTTGGCTGTGATACTATCTTTCTATAGTTTATT  
>HPV28\_Alpha\_1020202\_nt7681\_Genome\_Tile|1  
GCAAGTTTTTGGCTGTGATACTATCTTTCTATAGTTTATTTTCATTTGCTGTATCATTCTT  
>HPV28\_Alpha\_1020202\_nt7701\_Genome\_Tile|1  
CTATCTTTCTATAGTTTATTTTCATTTGCTGTATCATTCTTTCTGGCACGTCAAAATGTCT  
>HPV28\_Alpha\_1020202\_nt7900\_Genome\_Tile|1  
CTGCTTGCTTTCTAGCCATAAAATTAAGCAGTTGCTACACGTTTCTTTCCAACTATAATTA  
>HPV23\_Beta\_1020186\_nt0201\_Genome\_Tile|1  
TGCAGACTGTGCATTATTTAAGTAGGATGTGCTACACCAAATTATTGATGGACTCGACGC  
>HPV23\_Beta\_1020186\_nt0301\_Genome\_Tile|1  
ACCAGTGGTAGATCTCTTGCTACCTTGCGAGATTTTGTTCTAGGTTTCTTACCTATTTAGA  
>HPV23\_Beta\_1020186\_nt0341\_Genome\_Tile|1  
AGGTTTCTTACCTATTTAGAGTTGCGAGAATTTGATTATAAACATTTGCAGTTAATCTGG  
>HPV23\_Beta\_1020186\_nt0461\_Genome\_Tile|1  
GAAATTCAACAATTTTATCAGCTAACTGTGTATGGTCGTGAAATTGAGCAGGAGGAGCAA  
>HPV23\_Beta\_1020186\_nt0801\_Genome\_Tile|1  
TCCTTACAAGATCATCGTAGTTTGTGGAGGCTGTGAGACACAGTTAAAGCTTTACGTGCT  
>HPV23\_Beta\_1020186\_nt0841\_Genome\_Tile|1  
CAGTTAAAGCTTTACGTGCTAGCCACAGATTTTGAATTCGCTCGTTCCAAGCATCTTTG  
>HPV23\_Beta\_1020186\_nt0861\_Genome\_Tile|1  
AGCCACAGATTTTGAATTCGCTCGTTCCAAGCATCTTTGCTAGAAAACGTGAAGCTGGT  
>HPV23\_Beta\_1020186\_nt0881\_Genome\_Tile|1  
GCTCGTTCCAAGCATCTTTGCTAGAAAACGTGAAGCTGGTGTGTCCTGCCTGTCGAGAAG  
>HPV23\_Beta\_1020186\_nt0981\_Genome\_Tile|1  
AAGAAGGCTGTAGTACTTGGTGCTTATTAGAGGCTGCTTGTTCTGATGATAGTGACCTAG  
>HPV23\_Beta\_1020186\_nt1001\_Genome\_Tile|1  
TGCTTATTAGAGGCTGCTTGTTCTGATGATAGTGACCTAGATGATAGTTGGAGAAATTA  
>HPV23\_Beta\_1020186\_nt1421\_Genome\_Tile|1  
TTGTTAAGATGTAAAAATGCTAAAGCAGTGTTGCTACATAAATTTAAGGAAGGTTTTGGA  
>HPV23\_Beta\_1020186\_nt1441\_Genome\_Tile|1  
TAAAGCAGTGTGCTACATAAATTTAAGGAAGGTTTTGGAATTAGTTATAATGAGCTTAC  
>HPV23\_Beta\_1020186\_nt1461\_Genome\_Tile|1  
AATTTAAGGAAGGTTTTGGAATTAGTTATAATGAGCTTACCAGACAGTTTAAAAGCAATA  
>HPV23\_Beta\_1020186\_nt1481\_Genome\_Tile|1  
ATTAGTTATAATGAGCTTACCAGACAGTTTAAAAGCAATAAGACCTGCTGTAAACATTGG  
>HPV23\_Beta\_1020186\_nt1561\_Genome\_Tile|1  
AAAAGAAGAGCTCATAGATGCGTCTAAGCAATTGTTACAACAGCACTGTCTTATATTTG  
>HPV23\_Beta\_1020186\_nt1601\_Genome\_Tile|1  
CAGCACTGTTCTTATATTTGGTTGCAGACATACACACCTATGTCACTTTATTTATGTTGC  
>HPV23\_Beta\_1020186\_nt1661\_Genome\_Tile|1  
TTTAATGTTGCAAAAAGTAGAGAAACAGTTGTAAAATTATTGATTTCTATGCTGCAATA  
>HPV23\_Beta\_1020186\_nt1681\_Genome\_Tile|1  
AGAAACAGTTGTAAAATTATTGATTTCTATGCTGCAAAATACATGAAAATCATATATTATC  
>HPV23\_Beta\_1020186\_nt1701\_Genome\_Tile|1  
TGATTTCTATGCTGCAAAATACATGAAAATCATATATTATCAGAACCTCCGAAAAACAGAA  
>HPV23\_Beta\_1020186\_nt1921\_Genome\_Tile|1  
TAATGATCATCTTGACGAATGTAGTATTGCTTATAACTATGCAAAATTGGCTGACACAGA  
>HPV23\_Beta\_1020186\_nt2061\_Genome\_Tile|1  
AAAGAGGTGAAATGCGAGAAATGACTATTTCTGCATGGGTACATCATTGCATATCTAGAA  
>HPV23\_Beta\_1020186\_nt2081\_Genome\_Tile|1  
ATGACTATTTCTGCATGGGTACATCATTGCATATCTAGAATTGAAGGTGATGGACAATGG

>HPV23\_Beta\_1020186\_nt2141\_Genome\_Tile|1  
CAAGATATTGTTAAATTTTTGCGCTATCAGGGATTAACTTCATTGTATTTTAGATAAA  
>HPV23\_Beta\_1020186\_nt2161\_Genome\_Tile|1  
GCGCTATCAGGGATTAACTTCATTGTATTTTAGATAAAATTTAGAACGTTTTTACAGAA  
>HPV23\_Beta\_1020186\_nt2501\_Genome\_Tile|1  
CCACCATTAATTATTACATCTAATATTAGCCTTAAGAAAGAAAAGAAGTTTCCTTACTTG  
>HPV23\_Beta\_1020186\_nt2521\_Genome\_Tile|1  
TAATATTAGCCTTAAGAAAGAAAAGAAGTTTCCTTACTTGCATAGTAGAATATATGAATT  
>HPV23\_Beta\_1020186\_nt2801\_Genome\_Tile|1  
AATACAGCATTGGAACTCTTAAGACAAGAACAAATTTTATTGTATTATGCTCGAAAACG  
>HPV23\_Beta\_1020186\_nt3201\_Genome\_Tile|1  
GGCCAACTTAAAACTATTACATTAAATTTGAAGCAGATGCAAAGCGCTTTGGTACTACA  
>HPV23\_Beta\_1020186\_nt3621\_Genome\_Tile|1  
TCCAGATCAAGATCCAGATCACCAGAGTCTGTTACAGGGGTGGCGTTGCACCTAGTGAA  
>HPV23\_Beta\_1020186\_nt3861\_Genome\_Tile|1  
TCATGGATTGGGGTTCATTCTACTGATAGAGTAGGGCGTGCAAGGATGTTAATAGCATTT  
>HPV23\_Beta\_1020186\_nt3881\_Genome\_Tile|1  
TACTGATAGAGTAGGGCGTGCAAGGATGTTAATAGCATTTCTATTCTAATCATGAAAGGGA  
>HPV23\_Beta\_1020186\_nt3901\_Genome\_Tile|1  
CAAGGATGTTAATAGCATTTCTATTCTAATCATGAAAGGGAAAAATGTATTCAAGAAATGA  
>HPV23\_Beta\_1020186\_nt3921\_Genome\_Tile|1  
CATTCTAATCATGAAAGGGAAAAATGTATTCAAGAAATGAAGTTACCTTTAGGAGTAGAT  
>HPV23\_Beta\_1020186\_nt3941\_Genome\_Tile|1  
AAAATGTATTCAAGAAATGAAGTTACCTTTAGGAGTAGATTGGTCCTATGGACAATTTGA  
>HPV23\_Beta\_1020186\_nt4021\_Genome\_Tile|1  
ATTTAACACACTAACATTGCCTATTGCTATTTTTTTACTAACTTATATTGCTATATTGCT  
>HPV23\_Beta\_1020186\_nt4081\_Genome\_Tile|1  
ACTAACATTATGGTACGGGCGCAAAGAACTAAGCGAGCGTCTGTACTGATATATACAAA  
>HPV23\_Beta\_1020186\_nt4261\_Genome\_Tile|1  
GGTACAGGTAAGGTACCGGTGGTGCCACGGGTACGTCCCATTGCGACCTGGAGTACGA  
>HPV23\_Beta\_1020186\_nt4481\_Genome\_Tile|1  
AAGCAGAACTATTGCAGAGGTACATCCTACACCTGTAGACATAGGAATTGATACACCTA  
>HPV23\_Beta\_1020186\_nt4501\_Genome\_Tile|1  
GTACATCCTACACCTGTAGACATAGGAATTGATACACCTATTGTAGCTGGAGGCCGTGAC  
>HPV23\_Beta\_1020186\_nt4541\_Genome\_Tile|1  
TTGTAGCTGGAGGCCGTGACGCCATTTTAGAGGTGGTAGATACTAATCCTCCAACAAGGT  
>HPV23\_Beta\_1020186\_nt4561\_Genome\_Tile|1  
GCCATTTTAGAGGTGGTAGATACTAATCCTCCAACAAGGTTCAAGTGAACAAGAACACAA  
>HPV23\_Beta\_1020186\_nt4641\_Genome\_Tile|1  
AATAATTTCAGAATCCACACCTATCACAGGTGAGGCATCCCTTGCTGATCATGTATTTGT  
>HPV23\_Beta\_1020186\_nt4681\_Genome\_Tile|1  
CTTGCTGATCATGTATTTGTGTTTGAAGGTTCTGGAGGTCAGCACGTAGGAGCGGTAAC  
>HPV23\_Beta\_1020186\_nt4701\_Genome\_Tile|1  
GTTTGAAGGTTCTGGAGGTCAGCACGTAGGAGCGGTAACCTGAAGAGATTGAATTAGATAC  
>HPV23\_Beta\_1020186\_nt4741\_Genome\_Tile|1  
GAAGAGATTGAATTAGATACATATCCTTCCAGATATTCCTTTGAAATTGAGGAAGCTACA  
>HPV23\_Beta\_1020186\_nt4801\_Genome\_Tile|1  
CCACCACGCAGAACTAGTACTCCCATTTGAAAGAATAAGTCAGGAATTCAGGAACCTACGT  
>HPV23\_Beta\_1020186\_nt4821\_Genome\_Tile|1  
TCCCATTTGAAAGAATAAGTCAGGAATTCAGGAACCTACGTAGAGCACTGTATAACAGGCG  
>HPV23\_Beta\_1020186\_nt4881\_Genome\_Tile|1  
CTTAACAGAACAGGTTCAAGTAAAAAACCCCTTTATTTTTTAACTACTCCATCTAACTTGT  
>HPV23\_Beta\_1020186\_nt5021\_Genome\_Tile|1  
CTCCAGATAGGGACTTTTTTAGATATAGACAGATTAGGAAGACCATTATTAACAGAATCCA  
>HPV23\_Beta\_1020186\_nt5041\_Genome\_Tile|1

GATATAGACAGATTAGGAAGACCATTATTAACAGAATCCACTGAAGGCCGTATTAGATTA  
>HPV23\_Beta\_1020186\_nt5061\_Genome\_Tile|1  
ACCATTATTAACAGAATCCACTGAAGGCCGTATTAGATTAAGTAGGTTAGGTCAAAGGGC  
>HPV23\_Beta\_1020186\_nt5121\_Genome\_Tile|1  
TTCCATTCAAACACGCAGTGAACACGTGTTGGTTCACGTGTACACTTCTATACAGATTT  
>HPV23\_Beta\_1020186\_nt5141\_Genome\_Tile|1  
GAACACGTGTTGGTTCACGTGTACACTTCTATACAGATTTAAGCACTATTAATACAGAAG  
>HPV23\_Beta\_1020186\_nt5161\_Genome\_Tile|1  
GTACACTTCTATACAGATTTAAGCACTATTAATACAGAAGAACCTATAGAATTAGAATTA  
>HPV23\_Beta\_1020186\_nt5201\_Genome\_Tile|1  
AACCTATAGAATTAGAATTATTAGGCGAGCATTCCTGGAGATGCATCAGTTATTGAGGAAC  
>HPV23\_Beta\_1020186\_nt5221\_Genome\_Tile|1  
TTAGGCGAGCATTCCTGGAGATGCATCAGTTATTGAGGAACCTCTGCAAAGCACTGTAATA  
>HPV23\_Beta\_1020186\_nt5241\_Genome\_Tile|1  
TGCATCAGTTATTGAGGAACCTCTGCAAAGCACTGTAATAGATATGAACTTAGATGATGT  
>HPV23\_Beta\_1020186\_nt5281\_Genome\_Tile|1  
GATATGAACTTAGATGATGTTGAGGCTATTCAGGATACTATAGATACTGCAGATGATTAT  
>HPV23\_Beta\_1020186\_nt5301\_Genome\_Tile|1  
TGAGGCTATTCAGGATACTATAGATACTGCAGATGATTATAACTCTGCAGATCTTTTATT  
>HPV23\_Beta\_1020186\_nt5321\_Genome\_Tile|1  
TAGATACTGCAGATGATTATAACTCTGCAGATCTTTTATTGGACAATGCAATTGAAGAAT  
>HPV23\_Beta\_1020186\_nt5341\_Genome\_Tile|1  
AACTCTGCAGATCTTTTATTGGACAATGCAATTGAAGAATTTAATAATTCTCAATTAGTG  
>HPV23\_Beta\_1020186\_nt5381\_Genome\_Tile|1  
TTAATAATTCTCAATTAGTGTTTGGCACTTCTGATAGATCTTCGTCTGCATATTCTATAC  
>HPV23\_Beta\_1020186\_nt5461\_Genome\_Tile|1  
GAAACAATTGTATATGTTCAAGATATAGAAGGTAATCAGGTAATTTATCCTGGGCCACACA  
>HPV23\_Beta\_1020186\_nt5481\_Genome\_Tile|1  
AGATATAGAAGGTAATCAGGTAATTTATCCTGGGCCACAGAAAGGCCAACTATAATATT  
>HPV23\_Beta\_1020186\_nt5521\_Genome\_Tile|1  
GAAAGGCCAACTATAATATTTCCCTTACCTAGTGCCCCTGCTGTAGTCATACACACATTG  
>HPV23\_Beta\_1020186\_nt5541\_Genome\_Tile|1  
TCCCTTACCTAGTGCCCCTGCTGTAGTCATACACACATTGGACAAGTCTTTTGATTATTA  
>HPV23\_Beta\_1020186\_nt5561\_Genome\_Tile|1  
CTGTAGTCATACACACATTGGACAAGTCTTTTGATTATTACTTACATCCCAGCTTAAGAA  
>HPV23\_Beta\_1020186\_nt5981\_Genome\_Tile|1  
ATCGGCCGCGGCCAACCTTTAGGGGTCGGCAGTACAGGACACCCGCTATTTAATAAGCTC  
>HPV23\_Beta\_1020186\_nt6001\_Genome\_Tile|1  
AGGGGTCGGCAGTACAGGACACCCGCTATTTAATAAGCTCCGTGATGCAGAAAATTCTAG  
>HPV23\_Beta\_1020186\_nt6021\_Genome\_Tile|1  
ACCCGCTATTTAATAAGCTCCGTGATGCAGAAAATTCTAGTGAACGTCAGGAAGGTACTG  
>HPV23\_Beta\_1020186\_nt6041\_Genome\_Tile|1  
CGTGATGCAGAAAATTCTAGTGAACGTCAGGAAGGTACTGTAGATGACAGAAGAAATATC  
>HPV23\_Beta\_1020186\_nt6181\_Genome\_Tile|1  
CTGTAAAGATGCAGGTAGCCAACCTAGGGTGTGTCCCTCTTTAGAATTAAAAACAGTGT  
>HPV23\_Beta\_1020186\_nt6501\_Genome\_Tile|1  
AATATTATTACCTGCAGACCAACAAACACTTTAGAAAACCTCACTTTATTTTCCTACTG  
>HPV23\_Beta\_1020186\_nt6681\_Genome\_Tile|1  
ATAATACACGTAATACAACTTTAGTATCAGTGTTACCAATGACAGCAGTTTAGAAAAGT  
>HPV23\_Beta\_1020186\_nt6701\_Genome\_Tile|1  
TTTAGTATCAGTGTTACCAATGACAGCAGTTTAGAAAAGTATGATGCCACTAAAATTAGA  
>HPV23\_Beta\_1020186\_nt6721\_Genome\_Tile|1  
TGACAGCAGTTTAGAAAAGTATGATGCCACTAAAATTAGAGAGTTTACAAGACATGTTGA  
>HPV23\_Beta\_1020186\_nt6741\_Genome\_Tile|1  
ATGATGCCACTAAAATTAGAGAGTTTACAAGACATGTTGAAGAATACCAACTTTCTTTTA

>HPV23\_Beta\_1020186\_nt6761\_Genome\_Tile|1  
GAGTTTACAAGACATGTTGAAGAATACCAACTTTCTTTTATACTACAGTTGTGCAGGATA  
>HPV23\_Beta\_1020186\_nt6781\_Genome\_Tile|1  
AGAATACCAACTTTCTTTTATACTACAGTTGTGCAGGATACCTTTAAAGGCCGAGGTCTT  
>HPV23\_Beta\_1020186\_nt7041\_Genome\_Tile|1  
TGTCTCTAGACCTAGATCAATATCCCTTAGGCCGTAAGTTTCTGTTTCAAATTGGAGTGC  
>HPV23\_Beta\_1020186\_nt7061\_Genome\_Tile|1  
TATCCCTTAGGCCGTAAGTTTCTGTTTCAAATTGGAGTGCAGCGTGTACGGTCCGGTACC  
>HPV23\_Beta\_1020186\_nt7101\_Genome\_Tile|1  
AGCGTGTACGGTCCGGTACCAAACGGCTGCAACTCGAAAAGTGACCAAAACTGTCAAAA  
>HPV23\_Beta\_1020186\_nt7141\_Genome\_Tile|1  
AGTGACCAAAACTGTCAAAAGGAAAAAGTGCAATTGTAACCGATATCGGTCCGCAATAA  
>HPV22\_Beta\_1020178\_nt0161\_Genome\_Tile|1  
GTGGTAATTTATGCACTGCTTGCAATATTATTTAAGTAGGATGGGCTGCTATTCTGTATTC  
>HPV22\_Beta\_1020178\_nt0181\_Genome\_Tile|1  
TGCATATTATTTAAGTAGGATGGGCTGCTATTCTGTATTCTATGGCTTTGCAAAGACCACT  
>HPV22\_Beta\_1020178\_nt0301\_Genome\_Tile|1  
TAGATTCTGCAGTAGGTTTTTAACCTATTGGAATTGCGGCAATTTGATTATAAGAATTT  
>HPV22\_Beta\_1020178\_nt0361\_Genome\_Tile|1  
GCAATTAATTTGGACAGACGAGGACTTTGTGTTTGCATGTTGCAGCGGCTGTGCCTACGC  
>HPV22\_Beta\_1020178\_nt0481\_Genome\_Tile|1  
GCAAGAAGAACAACGACCTGTAGGCCAAATTTATATGAGATGTCAATATTGCTTGAAGTC  
>HPV22\_Beta\_1020178\_nt0781\_Genome\_Tile|1  
ACTCCTTACAAGATTGTAGTATATTGTGGGGGTTGTGATACAAAGCTGAAGCTGTATATA  
>HPV22\_Beta\_1020178\_nt0801\_Genome\_Tile|1  
ATATTGTGGGGTTGTGATACAAAGCTGAAGCTGTATATACTAGCAACTCTCTCTGGAAT  
>HPV22\_Beta\_1020178\_nt0821\_Genome\_Tile|1  
CAAAGCTGAAGCTGTATATACTAGCAACTCTCTCTGGAATTCGCGACTTCAAACATCTC  
>HPV22\_Beta\_1020178\_nt1401\_Genome\_Tile|1  
CCAGTTTGTAAAGATGCAACAATGTAAAGGCAGTATTGCTGGGAAAATTTAAAGACGCAT  
>HPV22\_Beta\_1020178\_nt1421\_Genome\_Tile|1  
AATGTAAAGGCAGTATTGCTGGGAAAATTTAAAGACGCATTTGGAGTGAGCTATAATGAG  
>HPV22\_Beta\_1020178\_nt1441\_Genome\_Tile|1  
GGGAAAATTTAAAGACGCATTTGGAGTGAGCTATAATGAGCTGACTAGACAATTTAGAAG  
>HPV22\_Beta\_1020178\_nt1461\_Genome\_Tile|1  
TTGGAGTGAGCTATAATGAGCTGACTAGACAATTTAGAAGTAATAAGACTTGCTGTAAGC  
>HPV22\_Beta\_1020178\_nt1661\_Genome\_Tile|1  
AGTAGAGAACTGTGATGCGATTGTTATCTTCCATGTTACAAGTTAATGAGAATCATATT  
>HPV22\_Beta\_1020178\_nt1681\_Genome\_Tile|1  
ATTGTTATCTTCCATGTTACAAGTTAATGAGAATCATATTTTATCAGAACCTCCAAAAAT  
>HPV22\_Beta\_1020178\_nt1701\_Genome\_Tile|1  
AAGTTAATGAGAATCATATTTTATCAGAACCTCCAAAAATCAGAAGTATGATAGCTGCTT  
>HPV22\_Beta\_1020178\_nt1901\_Genome\_Tile|1  
TATGATCAAGATTATGTTGATGAATGTACTATTGCATACCAGTATGCTAGATTGGCTGAT  
>HPV22\_Beta\_1020178\_nt2061\_Genome\_Tile|1  
GAGATATGTCAATTTCTGCATGGATACATCATTGTATATCAAAGATAGAAGGCGATGGTC  
>HPV22\_Beta\_1020178\_nt2141\_Genome\_Tile|1  
TTTTTGCGATACCAAGGGTTAAATTTTATAGTGTTTTTTAGATAAAATTTAGAACATTTCTA  
>HPV22\_Beta\_1020178\_nt2481\_Genome\_Tile|1  
AATTTCCACCTCTTATTATAACATCTAACATTAGTTTAAAAAAGAAAAAAATTTCCCT  
>HPV22\_Beta\_1020178\_nt2501\_Genome\_Tile|1  
ACATCTAACATTAGTTTAAAAAAGAAAAAAATTTCCCTATTTACATAGTAGAATATAT  
>HPV22\_Beta\_1020178\_nt2561\_Genome\_Tile|1  
GAATTTGAGTTTCCTAACAAATTTCCCTTTGACGCAAATGATACACCTCTGTTTAAACTT  
>HPV22\_Beta\_1020178\_nt3081\_Genome\_Tile|1

GTAATGTCTTATACAGTGTGGTCATACATTTATTATCAGACTGATGATGAGTCATGGGAA  
>HPV22\_Beta\_1020178\_nt3161\_Genome\_Tile|1  
CTATACAGGAGCTTACTATATAGAAGGGACCTTTAAAACCTATTATATTAAATTTGAAAC  
>HPV22\_Beta\_1020178\_nt3181\_Genome\_Tile|1  
TAGAAGGGACCTTTAAAACCTATTATATTAAATTTGAAACAGATGCTAAACGATATGGTA  
>HPV22\_Beta\_1020178\_nt3601\_Genome\_Tile|1  
GCCCCCTCACCAGGTCCCGCTCAAGGTCGCGATCCCGTACACGAGAGTCTGTTGACGGGG  
>HPV22\_Beta\_1020178\_nt3881\_Genome\_Tile|1  
AACCGATAGAATCGGGCGCTCTAGGATACTAATATCATTTCATACAGATAGGGAAAGAGA  
>HPV22\_Beta\_1020178\_nt3921\_Genome\_Tile|1  
CATACAGATAGGGAAAGAGAGAAGTGCTTGCAACAAATGAACTTCCTTTAGGTGTAGAA  
>HPV22\_Beta\_1020178\_nt3941\_Genome\_Tile|1  
GAAGTGCTTGCAACAAATGAACTTCCTTTAGGTGTAGAATGGTCATATGGCCAGTTTGA  
>HPV22\_Beta\_1020178\_nt4021\_Genome\_Tile|1  
TACTAACACACTAACATTGCCTATTTATACTAACCTATTTGCTTGCTACTAACAAAATGG  
>HPV22\_Beta\_1020178\_nt4241\_Genome\_Tile|1  
TGGTATAAGTACAGGTAAGGGTACCGGTGGTCCTACAGGCTATATTCCTTTAGGTCAAGG  
>HPV22\_Beta\_1020178\_nt4481\_Genome\_Tile|1  
AACTATTGCAGAAGTACATCCGGTCCCAATAGACAATGTGGAACCTTGACACACCTTTAGT  
>HPV22\_Beta\_1020178\_nt4521\_Genome\_Tile|1  
GAACTTGACACACCTTTAGTTTCTGGGGACCGTCACGCCATTTTGGAGGTGACTGATGCT  
>HPV22\_Beta\_1020178\_nt4541\_Genome\_Tile|1  
TTCTGGGGACCGTCACGCCATTTTGGAGGTGACTGATGCTAATCCCCCTTTTAGGCGCAC  
>HPV22\_Beta\_1020178\_nt4721\_Genome\_Tile|1  
GGTAGGGGATGCTAATGAAAGCATTGAATTGGATACTTTTCTTCTAGATATAGTTTTGA  
>HPV22\_Beta\_1020178\_nt4801\_Genome\_Tile|1  
CTCGTAGAGTTAGTACACCAATTGAAAGAATCAGTCAGGAATTTAGAACTTTAAGAAGAG  
>HPV22\_Beta\_1020178\_nt4821\_Genome\_Tile|1  
ATTGAAAGAATCAGTCAGGAATTTAGAACTTTAAGAAGAGCCTTATACAACAGAAGATTA  
>HPV22\_Beta\_1020178\_nt4861\_Genome\_Tile|1  
CCTTATACAACAGAAGATTAACAGAACAGGTCCAAGTAAGAGACCCCTTGTTTATTCGAT  
>HPV22\_Beta\_1020178\_nt4881\_Genome\_Tile|1  
ACAGAACAGGTCCAAGTAAGAGACCCCTTGTTTATTCGATCCCCGTCCAGGCTTGTGAGA  
>HPV22\_Beta\_1020178\_nt5101\_Genome\_Tile|1  
GGTTAGGGCAACGTGCATCGCTGAGCACACGCAGCGGCGCACGTGTAGGTGCTAGAGTGC  
>HPV22\_Beta\_1020178\_nt5141\_Genome\_Tile|1  
ACGTGTAGGTGCTAGAGTGCATTTCTTTACAGATATTAGCACTATTAATGCAGAAGAGCC  
>HPV22\_Beta\_1020178\_nt5201\_Genome\_Tile|1  
CATTGAATTAGAATTATTAGGTGAGCATTCTGGCGACAGCTCTGTAGTACAAGAACCATT  
>HPV22\_Beta\_1020178\_nt5241\_Genome\_Tile|1  
TCTGTAGTACAAGAACCATTTGAAAGCACAATATTGGATGTCAATATTGACAACATACCT  
>HPV22\_Beta\_1020178\_nt5281\_Genome\_Tile|1  
TCAATATTGACAACATACCTGAAAGTTTGGATACAAACATAGCAGAAACATCTGTAGACT  
>HPV22\_Beta\_1020178\_nt5301\_Genome\_Tile|1  
GAAAGTTTGGATACAAACATAGCAGAAACATCTGTAGACTATGATTCTGCTGATTTGTTA  
>HPV22\_Beta\_1020178\_nt5321\_Genome\_Tile|1  
AGCAGAAACATCTGTAGACTATGATTCTGCTGATTTGTTATTAGACAACGGTGTGGAGGA  
>HPV22\_Beta\_1020178\_nt5341\_Genome\_Tile|1  
ATGATTCTGCTGATTTGTTATTAGACAACGGTGTGGAGGACTTTAGTAGGTCACAATTGG  
>HPV22\_Beta\_1020178\_nt5361\_Genome\_Tile|1  
TTAGACAACGGTGTGGAGGACTTTAGTAGGTCACAATTGGTAATAGGTCCTTCAGATAGA  
>HPV22\_Beta\_1020178\_nt5381\_Genome\_Tile|1  
CTTTAGTAGGTCACAATTGGTAATAGGTCCTTCAGATAGATCACTTCCATCTATTACTGT  
>HPV22\_Beta\_1020178\_nt5401\_Genome\_Tile|1  
TAATAGGTCCTTCAGATAGATCACTTCCATCTATTACTGTTCCACAATTTGAATCCCCTA



>HPV22\_Beta\_1020178\_nt5461\_Genome\_Tile|1  
GAGAAACCATTTGTGTACATACAAGACATAGAGGGTAATACAGTTGTATATCCTAAATATG  
>HPV22\_Beta\_1020178\_nt5481\_Genome\_Tile|1  
CAAGACATAGAGGGTAATACAGTTGTATATCCTAAATATGAAGAAAGGCCAACTATTATA  
>HPV22\_Beta\_1020178\_nt5521\_Genome\_Tile|1  
AAGAAAGGCCAACTATTATATTACCTACACCCCTCGGGGCCTGCTATAATTCAATCACCTA  
>HPV22\_Beta\_1020178\_nt5561\_Genome\_Tile|1  
TGCTATAATTCAATCACCTACACATTCTCCTTTGACTATTATTTACATCCTAGCTTGCG  
>HPV22\_Beta\_1020178\_nt5881\_Genome\_Tile|1  
TTTAGAGTAACATTTCCAGATCCTAACAATTTGCTTTGGGAGATATGACAATCCATGAT  
>HPV22\_Beta\_1020178\_nt5901\_Genome\_Tile|1  
TCCTAACAATTTGCTTTGGGAGATATGACAATCCATGATCCCGAAAGGTATAGATTAGT  
>HPV22\_Beta\_1020178\_nt5921\_Genome\_Tile|1  
GAGATATGACAATCCATGATCCCGAAAGGTATAGATTAGTATGGGCTTGTAAGGGTTAG  
>HPV22\_Beta\_1020178\_nt6041\_Genome\_Tile|1  
TACATGATACTGAAAACCCTACTGAACGCCAGGAAGGAACATCAGATGATAGAAGAAATG  
>HPV22\_Beta\_1020178\_nt6441\_Genome\_Tile|1  
TTTTGTACGTGGTGGTCTTGTGGTGATGCTATACCAGATGATGCAGTTCAACAAGATCA  
>HPV22\_Beta\_1020178\_nt6501\_Genome\_Tile|1  
TAAATATTACTTGCCTGCAGCTTCACAGACTGCTTTAGAAAACCTCCACTTACTTTCCAAC  
>HPV22\_Beta\_1020178\_nt6701\_Genome\_Tile|1  
ATTTTTCTATTAGTGTGGCAAGTGACGGCACACAGTTAATTATGATGCTAAAAAATCA  
>HPV22\_Beta\_1020178\_nt6721\_Genome\_Tile|1  
AGTGACGGCACACAGTTAATTATGATGCTAAAAAATCAGAGAATTTATGCGCCATGTG  
>HPV22\_Beta\_1020178\_nt6761\_Genome\_Tile|1  
GAGAATTTATGCGCCATGTGGAAGAATACCAATTATCCTTTATTTTGCAGCTATGTAGAA  
>HPV22\_Beta\_1020178\_nt6781\_Genome\_Tile|1  
GAAGAATACCAATTATCCTTTATTTTGCAGCTATGTAGAATACCATTAGAAGCAGAGGTA  
>HPV22\_Beta\_1020178\_nt7061\_Genome\_Tile|1  
AGTATCCACTGGGTCGTAAATTTTTTATTCAATCTGGGTTACAACGTGCAAGGGCCAGTG  
>HPV22\_Beta\_1020178\_nt7081\_Genome\_Tile|1  
TTTTTATTTCAATCTGGGTTACAACGTGCAAGGGCCAGTGCCAGGGTCAGTGTGAAACGT  
>HPV22\_Beta\_1020178\_nt7141\_Genome\_Tile|1  
TCTGCTACGCGGAAAACGTCTAAAACGTAAAACGAAGGAACTTACCTCTTAACCGTTT  
>HPV21\_Beta\_1020170\_nt0161\_Genome\_Tile|1  
TATTCATATATACATACTAGGGAAGATGCCCTAGTACTCATGGCTGACTCTTCAACAGAC  
>HPV21\_Beta\_1020170\_nt0221\_Genome\_Tile|1  
AGTGCTGACGAAGGTCCTTCTCCTAAGCGTAGACATTTAGAAGAAGAAAATACATCTAGC  
>HPV21\_Beta\_1020170\_nt0301\_Genome\_Tile|1  
AGCTACAATTCGTGACCTAGCCAATCTGTTAGAGATACCATTGGATGATTGTTTAGTACC  
>HPV21\_Beta\_1020170\_nt2181\_Genome\_Tile|1  
CTATAGCAAAGTTCCTTAGATATCAGCAAGTAAATTTTATAATGTTTCTAGCAGCATTA  
>HPV21\_Beta\_1020170\_nt2901\_Genome\_Tile|1  
GTGACACGGCTTGGATATCAATATGTACCTCCATTAGCAGTTTCAGAATCAAGAGCTAAA  
>HPV21\_Beta\_1020170\_nt2921\_Genome\_Tile|1  
ATATGTACCTCCATTAGCAGTTTCAGAATCAAGAGCTAAACAGGCTATAGGGATGATGCT  
>HPV21\_Beta\_1020170\_nt3621\_Genome\_Tile|1  
TCCTATTCCCGGTCCCGGTCTCAATCGTCTGACCAGCCGCAATACCGATTAGATCCGGA  
>HPV21\_Beta\_1020170\_nt4221\_Genome\_Tile|1  
AAAGGTGTTGACCGGTCGTATGGTTCCCTTTGATAGCCTATAGCAGCCTTTAACATACTAA  
>HPV21\_Beta\_1020170\_nt4281\_Genome\_Tile|1  
CTATAGCTCTGCTACTAACATATTAACACTTTTTTGATTATATATTTTTTTTTTTATTTT  
>HPV21\_Beta\_1020170\_nt5101\_Genome\_Tile|1  
ATTCAAAAGAATTCAAATATTATAAGGAGAAGGGGTGGCGGGCTCACAAATAGGCGTTTG  
>HPV21\_Beta\_1020170\_nt5121\_Genome\_Tile|1

TATAAGGAGAAGGGGTGGCGGGCTCACAAATAGGCGTTTGGTTCAACAGGTTAATGTAGA  
>HPV21\_Beta\_1020170\_nt5141\_Genome\_Tile|1  
GGCTCACAAATAGGCGTTTGGTTCAACAGGTTAATGTAGAGAATCCTTTGTTTGTATCCA  
>HPV21\_Beta\_1020170\_nt5161\_Genome\_Tile|1  
GTTCAACAGGTTAATGTAGAGAATCCTTTGTTTGTATCCAGGCCTTCTAGATTAGTGCAG  
>HPV21\_Beta\_1020170\_nt5361\_Genome\_Tile|1  
AGGTTACGTGAGAGTTAGTCGTCTTGGTAAACGAGGAACCTATTCGTACTCGTTCAGGAAC  
>HPV21\_Beta\_1020170\_nt5381\_Genome\_Tile|1  
GTCTTGGTAAACGAGGAACCTATTCGTACTCGTTCAGGAACACAAATTGGTTCTCAGGTCC  
>HPV21\_Beta\_1020170\_nt5641\_Genome\_Tile|1  
TTTAGTGGTTCCCAATTAGTGGTTGGAGGCCGCCGCTCCACTTCTTCTTATACTGTTCCA  
>HPV21\_Beta\_1020170\_nt5761\_Genome\_Tile|1  
GCCTATCCTGAAGATCGAGACACTAGTACAGATATAATCTATCCAACACCAGATTTGCCA  
>HPV21\_Beta\_1020170\_nt5781\_Genome\_Tile|1  
CACTAGTACAGATATAATCTATCCAACACCAGATTTGCCAGTTGTAATCATACACACATT  
>HPV21\_Beta\_1020170\_nt5821\_Genome\_Tile|1  
GTTGTAATCATACACACATTTGATACAAGCGGTGATTTTTACTTACATCCGAGTCTTAGC  
>HPV21\_Beta\_1020170\_nt5841\_Genome\_Tile|1  
TGATACAAGCGGTGATTTTTACTTACATCCGAGTCTTAGCAGAAAATTTAAGAGAAGAAG  
>HPV21\_Beta\_1020170\_nt6441\_Genome\_Tile|1  
GGATAAAGCTATCCCATGTGCAACTGACAATCCACCTCCAGGATCGTGCCCTCCGATTGA  
>HPV21\_Beta\_1020170\_nt6461\_Genome\_Tile|1  
CAACTGACAATCCACCTCCAGGATCGTGCCCTCCGATTGAATTAATTAATTCAGCAATAC  
>HPV21\_Beta\_1020170\_nt6961\_Genome\_Tile|1  
GTTACAGTAGTAGACAACACTCGTAACACAACTTTAGTATTTTCAGTAAATCCTGAGAAT  
>HPV21\_Beta\_1020170\_nt6981\_Genome\_Tile|1  
TCGTAACACAACTTTAGTATTTTCAGTAAATCCTGAGAATGCAGACGTGTCTAAAATTGA  
>HPV21\_Beta\_1020170\_nt7001\_Genome\_Tile|1  
TTTCAGTAAATCCTGAGAATGCAGACGTGTCTAAAATTGAAAATTATAAAGCCGAGAGCT  
>HPV21\_Beta\_1020170\_nt7661\_Genome\_Tile|1  
AGATACTACGCGGCCAGAGTTGGATCACATCTCGTTGTTCTAACACGCTAAGGACTCAA  
>HPV20\_Beta\_1020162\_nt0161\_Genome\_Tile|1  
AGACAGATATCATAGAGCTAATGCAGAGAGTGCAGGCACATGGCTACACCTCCTTCTTCA  
>HPV20\_Beta\_1020162\_nt0201\_Genome\_Tile|1  
TGGCTACACCTCCTTCTTCAGAAGACAGCGCTGATGAAGGACCATCTAATATTGGAGAGG  
>HPV20\_Beta\_1020162\_nt0221\_Genome\_Tile|1  
GAAGACAGCGCTGATGAAGGACCATCTAATATTGGAGAGGCCAAAACCTCCAATCTTAGAG  
>HPV20\_Beta\_1020162\_nt0241\_Genome\_Tile|1  
ACCATCTAATATTGGAGAGGCCAAAACCTCCAATCTTAGAGCCACCATTGCCTGCAACAAT  
>HPV20\_Beta\_1020162\_nt0261\_Genome\_Tile|1  
CAAAACCTCCAATCTTAGAGCCACCATTGCCTGCAACAATCTGTGGCCTAGCAAACTTT  
>HPV20\_Beta\_1020162\_nt2301\_Genome\_Tile|1  
CTGGAAAATCTGCATTCACTATGTCATTGATACATGTGTTAAAGGGAAGGGTATTGTCCT  
>HPV20\_Beta\_1020162\_nt4761\_Genome\_Tile|1  
AACTGATACACCAGTTACATCTACTACCAGTGGTTCTAGTGCAGTTCTAGAGGTAGCACC  
>HPV20\_Beta\_1020162\_nt4781\_Genome\_Tile|1  
CTACTACCAGTGGTTCTAGTGCAGTTCTAGAGGTAGCACCAGAACCAACACCTCCAGCTC  
>HPV20\_Beta\_1020162\_nt4801\_Genome\_Tile|1  
GCAGTTCTAGAGGTAGCACCAGAACCAACACCTCCAGCTCGTGTGAGAGTCAGCCGCACC  
>HPV20\_Beta\_1020162\_nt4821\_Genome\_Tile|1  
AGAACCAACACCTCCAGCTCGTGTGAGAGTCAGCCGCACCCAGTATCATAACCCATCATT  
>HPV20\_Beta\_1020162\_nt4881\_Genome\_Tile|1  
TCAATAATAACTGAATCAACACCAACATTGGGGGAAAGCTCATTAGCGGATCATATAGT  
>HPV20\_Beta\_1020162\_nt4921\_Genome\_Tile|1  
TCATTAGCGGATCATATAGTAGTGACATCTGGTTCTGGGGGCCAAGCAATTGGGGGGATG

>HPV20\_Beta\_1020162\_nt4961\_Genome\_Tile|1  
GCCAAGCAATTGGGGGGATGACACCTGAACCTTATAGAGCTTCAGGATTTCCCATCAAGGT  
>HPV20\_Beta\_1020162\_nt5061\_Genome\_Tile|1  
TAGCACACCTATGCAAAGACTTCAAAATGTGTTTCAGGCGTAGAGGAGGCCTTACTAACAG  
>HPV20\_Beta\_1020162\_nt5081\_Genome\_Tile|1  
TTCAAAATGTGTTTCAGGCGTAGAGGAGGCCTTACTAACAGAAGATTAGTTCAACAAGTGC  
>HPV20\_Beta\_1020162\_nt5141\_Genome\_Tile|1  
CTGTAGACAATCCATTATTTTTTGACACAACCTTCTAGATTGGTCCGGTTTCAGTTTGATA  
>HPV20\_Beta\_1020162\_nt5241\_Genome\_Tile|1  
AGATTTAGACACTTTTAAATGAGCCCCAGACAGAGACTTTTTGGATGTTTCAGAGTTTAGG  
>HPV20\_Beta\_1020162\_nt5341\_Genome\_Tile|1  
GTCAGCCGTGCAGGTCAACGAAGGACTATCAGAACTCGTTCTGGAGCACAAATAGGGTCT  
>HPV20\_Beta\_1020162\_nt5521\_Genome\_Tile|1  
GTTGATATCAATGTAGATGAAAACCCACTTTCAGAAATCAGTGCATATTCTGATGATTTA  
>HPV20\_Beta\_1020162\_nt5621\_Genome\_Tile|1  
TAGTTGTAGGGGAAGGCGTTCTACATCTACATACACTGTTCCCTCACTTTGAACTACTA  
>HPV20\_Beta\_1020162\_nt5641\_Genome\_Tile|1  
TCTACATCTACATACACTGTTCCCTCACTTTGAACTACTAGATCTAGCTCTTACTATGTA  
>HPV20\_Beta\_1020162\_nt5661\_Genome\_Tile|1  
TCCTCACTTTGAACTACTAGATCTAGCTCTTACTATGTACAAGATACAAAGGGGTATTA  
>HPV20\_Beta\_1020162\_nt5681\_Genome\_Tile|1  
GATCTAGCTCTTACTATGTACAAGATACAAAGGGGTATTATGTAGCATATCCTGAAGATA  
>HPV20\_Beta\_1020162\_nt5721\_Genome\_Tile|1  
TGTAGCATATCCTGAAGATAGAGATGTTAGTAAGGACATTATTTATCCTAATCCAGATTT  
>HPV20\_Beta\_1020162\_nt6041\_Genome\_Tile|1  
ATTTTAAATATATATGACATCCAAGGCACTAAGATAAAAGTCCCTAAGGTTTCTGGAAATC  
>HPV20\_Beta\_1020162\_nt6261\_Genome\_Tile|1  
ATTTAATAAACTTGGTGACACAGAAAACCCTAATTCATATAAAGGGAATTCAACTGATGA  
>HPV20\_Beta\_1020162\_nt6421\_Genome\_Tile|1  
GACGACGTTCCAAACCCAGGTTTCATGCCCTCCAATAGAATTAAAAAATACAGCAATACAA  
>HPV20\_Beta\_1020162\_nt6741\_Genome\_Tile|1  
TGCATTCTACATTCCACCTGTGAATAATCAGGCACAGAACAACCTAGGTAATTCAATGTA  
>HPV20\_Beta\_1020162\_nt6901\_Genome\_Tile|1  
TGGTTCAATCAACTATTTGTTACTGTAGTAGATAATACTCGAAATACAAATTTTAGCATA  
>HPV20\_Beta\_1020162\_nt6921\_Genome\_Tile|1  
TACTGTAGTAGATAAATACTCGAAATACAAATTTTAGCATATCAGTTCATTCAGAAAACAC  
>HPV20\_Beta\_1020162\_nt6941\_Genome\_Tile|1  
GAAATACAAATTTTAGCATATCAGTTCATTCAGAAAACACTGATGTTTCTAAAATTCAAA  
>HPV20\_Beta\_1020162\_nt7261\_Genome\_Tile|1  
TACAAGGATCTAAACTTTTGGAATGTTGACCTATCAGAAAGATTATCCTTAGAATTGGAT  
>HPV20\_Beta\_1020162\_nt7381\_Genome\_Tile|1  
GGTACAAAACTGTATCTTCAAAGTTATCTACTAGGGCGTCAAACGAAAACGCAAACAA  
>HPV20\_Beta\_1020162\_nt7641\_Genome\_Tile|1  
GGCTCAAACCTTCATCGTCCCAACACGTTTCGGAACAGGAGGAAATGTAAGGCTGCCAACGC  
>HPV20\_Beta\_1020162\_nt7681\_Genome\_Tile|1  
AAATGTAAGGCTGCCAACGCTTTTGGCTCTTCTTTTTGGCACAGCAGAAGACCGTTAACG  
>HPV42\_Alpha\_333211\_nt0181\_Genome\_Tile|1  
CATTCGGAATTTACAGATTTTCCTGCATTTGGTGCAAAAAGCACTTAACAGGCGCAGAGG  
>HPV42\_Alpha\_333211\_nt0201\_Genome\_Tile|1  
TCCTGCATTTGGTGCAAAAAGCACTTAACAGGCGCAGAGGTGCTCGCGTACCATTTTAAA  
>HPV42\_Alpha\_333211\_nt0221\_Genome\_Tile|1  
GCACTTAACAGGCGCAGAGGTGCTCGCGTACCATTTTAAAGATTTGGTAGTGGTGTGGAG  
>HPV42\_Alpha\_333211\_nt0401\_Genome\_Tile|1  
TTTAGAAGAACAACAAATTAGATGTGCCCTTGTGTCAAAAGCCGTTATCACAGAGCGAAAA  
>HPV42\_Alpha\_333211\_nt0421\_Genome\_Tile|1

GATGTGCCTTGTGTCAAAAGCCGTTATCACAGAGCGAAAAAACCATCATATTGATACAG  
>HPV42\_Alpha\_333211\_nt0441\_Genome\_Tile|1  
CCGTTATCACAGAGCGAAAAAACCATCATATTGATACAGGTACAAGATTTC AATTTATA  
>HPV42\_Alpha\_333211\_nt0461\_Genome\_Tile|1  
AAACCATCATATTGATACAGGTACAAGATTTC AATTTATATTGTGTCAGTGGACGGGTCG  
>HPV42\_Alpha\_333211\_nt0701\_Genome\_Tile|1  
ACACAGTGTACAAAGTCTGTTAAACTCGTTGTGCAGTGTACAGAGGCGGACATAAGAAAC  
>HPV42\_Alpha\_333211\_nt0941\_Genome\_Tile|1  
ATGTAGACGATAGTGGGTTAGATCTTGTGGATTTTGTAGATAATAGTACAGTAATACATA  
>HPV42\_Alpha\_333211\_nt0981\_Genome\_Tile|1  
TAATAGTACAGTAATACATACAAAGCAGGTACATGCACAAGCCTTATTAAATAACAACA  
>HPV42\_Alpha\_333211\_nt1661\_Genome\_Tile|1  
GAAAAATCGTACTACAGTGTCCAAAGGCCCTTAGTAAATTATTAAACATACCTACAAATC  
>HPV42\_Alpha\_333211\_nt1681\_Genome\_Tile|1  
TCCAAAGGCCTTAGTAAATTATTAAACATACCTACAAATCAATTATTAATAGAGCCACCT  
>HPV42\_Alpha\_333211\_nt1721\_Genome\_Tile|1  
AATTATTAATAGAGCCACCTCGGTTACAAAGTGTGGCTGCCGCCATATACTGGTTTAGAT  
>HPV42\_Alpha\_333211\_nt2761\_Genome\_Tile|1  
GGAAAATAGTAGGGATTACAAAAACATATTGAACATTGGAAATGTTTACGTATGGAGGC  
>HPV42\_Alpha\_333211\_nt2841\_Genome\_Tile|1  
GTGAAATGGGCTTTGCAAATATAGGACATCAAATAGTACCAACATTGGAAACATGTAGAG  
>HPV42\_Alpha\_333211\_nt3321\_Genome\_Tile|1  
ACGCAGAGATACCCTCTACTGGATCTACTAAGTTGGTACAACAAGTGTGCACCACAAACC  
>HPV42\_Alpha\_333211\_nt3401\_Genome\_Tile|1  
ATTGACAACCACCACGCAGACTGTACAGACGGAACAGCATACAACGTGCCCATCCAAACC  
>HPV42\_Alpha\_333211\_nt3441\_Genome\_Tile|1  
ACAACGTGCCCATCCAAACCTCACCGCCACGAAAACGATACAGACAGTGTGGACAGTCGC  
>HPV42\_Alpha\_333211\_nt3481\_Genome\_Tile|1  
CAGACAGTGTGGACAGTCGCCATCACAGCACCTGCAGCACTCAAACCCCAGCATCCCCAG  
>HPV42\_Alpha\_333211\_nt3501\_Genome\_Tile|1  
CATCACAGCACCTGCAGCACTCAAACCCCAGCATCCCCAGCATCCCCAGCGCATCCGTGG  
>HPV42\_Alpha\_333211\_nt3521\_Genome\_Tile|1  
TCAAACCCCAGCATCCCCAGCATCCCCAGCGCATCCGTGGACCCTGGATTGTGTGGGGTC  
>HPV42\_Alpha\_333211\_nt3561\_Genome\_Tile|1  
ACCCTGGATTGTGTGGGGTCAGAACTAACAGTGAAAAGTGTAAACAAGCGACGGAACCACT  
>HPV42\_Alpha\_333211\_nt3641\_Genome\_Tile|1  
GTAATTCATTTACAAGGTGACCCTAATTGCCTAAAATGCCTACGATTTAGGCTAAAAAGA  
>HPV42\_Alpha\_333211\_nt3681\_Genome\_Tile|1  
TACGATTTAGGCTAAAAAGAAATTGTTTACATTTATTTACACAGGTGTCATCTACATGGC  
>HPV42\_Alpha\_333211\_nt3701\_Genome\_Tile|1  
AATTGTTTACATTTATTTACACAGGTGTCATCTACATGGCATTTAACAGAAAATGATTGT  
>HPV42\_Alpha\_333211\_nt3761\_Genome\_Tile|1  
ACACGTGACACTAAAACTGGTATAATAACAATACATTATTATGATGAAGCACAAAGAAAT  
>HPV42\_Alpha\_333211\_nt3781\_Genome\_Tile|1  
TATAATAACAATACATTATTATGATGAAGCACAAAGAAATTTATTTTAAATACTGTAAA  
>HPV42\_Alpha\_333211\_nt3841\_Genome\_Tile|1  
AATACCTTCTGGGATAAAATCCTGTATTGGATATATGTCTATGTTACAGTTTATATGATT  
>HPV42\_Alpha\_333211\_nt3861\_Genome\_Tile|1  
CCTGTATTGGATATATGTCTATGTTACAGTTTATATGATTAGTTGTATATGTGTATAAAC  
>HPV42\_Alpha\_333211\_nt3881\_Genome\_Tile|1  
ATGTTACAGTTTATATGATTAGTTGTATATGTGTATAAACAGTTATAGGACTTCAATACT  
>HPV42\_Alpha\_333211\_nt3901\_Genome\_Tile|1  
AGTTGTATATGTGTATAAACAGTTATAGGACTTCAATACTGTGACTCCACAACGTGTGGG  
>HPV42\_Alpha\_333211\_nt4041\_Genome\_Tile|1  
TTATCCATATCCTGTATGGGCCTCTTGCCTTGCTAGCTACCTAACATTGGTGCTATTATC

>HPV42\_Alpha\_333211\_nt4081\_Genome\_Tile|1  
CTAACATTGGTGTCTATTATCATGGTTGCAGGTACTAACATACTTTGACTATTTTTTTCTA  
>HPV42\_Alpha\_333211\_nt4101\_Genome\_Tile|1  
ATGGTTGCAGGTACTAACATACTTTGACTATTTTTTTCTATGTTTAATCATTCCTTGGTAT  
>HPV42\_Alpha\_333211\_nt4121\_Genome\_Tile|1  
ACTTTGACTATTTTTTTCTATGTTTAATCATTCCTTGGTATTCCTTCTGTCTTACTAACAT  
>HPV42\_Alpha\_333211\_nt4201\_Genome\_Tile|1  
CAATAACACATATTAGTTTAGGTGTGTGTGTGTGGTGTGCATGTGATTTGTACATGGTTG  
>HPV42\_Alpha\_333211\_nt4241\_Genome\_Tile|1  
ATGTGATTTGTACATGGTTGTACATATATAATACCAATTATTGTTTGGCTACTATTTTCA  
>HPV42\_Alpha\_333211\_nt4261\_Genome\_Tile|1  
TACATATATAATACCAATTATTGTTTGGCTACTATTTTCATTTATAGCCACACTGCTGTT  
>HPV42\_Alpha\_333211\_nt4281\_Genome\_Tile|1  
TTGTTTGGCTACTATTTTCATTTATAGCCACACTGCTGTTTTCATATTGGTATTACAAA  
>HPV42\_Alpha\_333211\_nt4301\_Genome\_Tile|1  
TTTATAGCCACACTGCTGTTTTCATATTGGTATTACAAACATATAAACTGTTACCATAC  
>HPV42\_Alpha\_333211\_nt4341\_Genome\_Tile|1  
CATATAAACTGTTACCATACGTATATACAGTGCTGTAAATAAACTTTTGTATATTGTGT  
>HPV42\_Alpha\_333211\_nt4361\_Genome\_Tile|1  
GTATATACAGTGCTGTAAATAAACTTTTGTATATTGTGTGTACTTCTTTTGTGCTATTA  
>HPV42\_Alpha\_333211\_nt4721\_Genome\_Tile|1  
CTGATCCTTCTATTGTTTCCTTATTAGAAGAGTCATCAGTTATTGATGCAGGAATAACAG  
>HPV42\_Alpha\_333211\_nt4741\_Genome\_Tile|1  
TTATTAGAAGAGTCATCAGTTATTGATGCAGGAATAACAGTACCTGATATTACTTCTCAT  
>HPV42\_Alpha\_333211\_nt4761\_Genome\_Tile|1  
TATTGATGCAGGAATAACAGTACCTGATATTACTTCTCATGGAGGTTTAAATATTACTAC  
>HPV42\_Alpha\_333211\_nt4801\_Genome\_Tile|1  
GGAGGTTTAAATATTACTACATCTACTGGTGGGCCTGCCTCAACGCCTGCTATATTAGAT  
>HPV42\_Alpha\_333211\_nt4821\_Genome\_Tile|1  
ATCTACTGGTGGGCCTGCCTCAACGCCTGCTATATTAGATATCTCCCCCTCCCACTAATAC  
>HPV42\_Alpha\_333211\_nt4841\_Genome\_Tile|1  
CAACGCCTGCTATATTAGATATCTCCCCCTCCCACTAATACTATACGTGTCACAACAATA  
>HPV42\_Alpha\_333211\_nt4861\_Genome\_Tile|1  
ATCTCCCCCTCCCACTAATACTATACGTGTCACAACAATACTACATCTACCAATCCTTTATAT  
>HPV42\_Alpha\_333211\_nt4921\_Genome\_Tile|1  
ATTGATCCTTTTACATTGCAGCCGCCATTGCCAGCAGAGGTTAATGGGCGCCTATTAATA  
>HPV42\_Alpha\_333211\_nt4941\_Genome\_Tile|1  
GCCGCCATTGCCAGCAGAGGTTAATGGGCGCCTATTAATATCTACTCCTACCATCACACC  
>HPV42\_Alpha\_333211\_nt5021\_Genome\_Tile|1  
CAATGGACACGTTTGTGTATCTACAGATACAATAACACATTTACTAGTACTCCCATTC  
>HPV42\_Alpha\_333211\_nt5041\_Genome\_Tile|1  
TCTACAGATACAATAACACATTTACTAGTACTCCCATTCCTGGCCCTCGGTCGTCTGCA  
>HPV42\_Alpha\_333211\_nt5061\_Genome\_Tile|1  
ATTTACTAGTACTCCCATTCCTGGCCCTCGGTCGTCTGCACGCCTGGGGTTATATTCTAG  
>HPV42\_Alpha\_333211\_nt5141\_Genome\_Tile|1  
TTACTACCAGTGCATTTTTAACATCTCCTGCACGGTTGGTTACTTATGACAATCCAGCCT  
>HPV42\_Alpha\_333211\_nt5181\_Genome\_Tile|1  
TACTTATGACAATCCAGCCTATGAAGGACTTACGGAGGATACATTAGTATTTGAACATCC  
>HPV42\_Alpha\_333211\_nt5301\_Genome\_Tile|1  
GTTATCATCCAAACAGGGTAGTGTACGTGTTAGTAGAATTGGACAAAGGCTGTCTATGCA  
>HPV42\_Alpha\_333211\_nt5321\_Genome\_Tile|1  
GTGTACGTGTTAGTAGAATTGGACAAAGGCTGTCTATGCAGACACGTCGCGGGACCCGTT  
>HPV42\_Alpha\_333211\_nt5381\_Genome\_Tile|1  
TTGGGTCACGTGTACACTTTTTTTCATGACCTTAGCCCTATTACACACTCTTCAGAAACTA  
>HPV42\_Alpha\_333211\_nt5401\_Genome\_Tile|1

TTTCATGACCTTAGCCCTATTACACACTCTTCAGAACTATTGAATTACAGCCTTTATCT  
>HPV42\_Alpha\_333211\_nt5421\_Genome\_Tile|1  
TACACACTCTTCAGAACTATTGAATTACAGCCTTTATCTGCTTCTTCAGTATCTGCAGC  
>HPV42\_Alpha\_333211\_nt5461\_Genome\_Tile|1  
GCTTCTTCAGTATCTGCAGCCTCCAATATTAATGATGGGTTATTTGATATTTATGTTGAT  
>HPV42\_Alpha\_333211\_nt5481\_Genome\_Tile|1  
CTCCAATATTAATGATGGGTTATTTGATATTTATGTTGATACTAGTGATGTAAATGTTAC  
>HPV42\_Alpha\_333211\_nt5501\_Genome\_Tile|1  
TATTTGATATTTATGTTGATACTAGTGATGTAAATGTTACAAATACCACTTCCTCTATAC  
>HPV42\_Alpha\_333211\_nt5521\_Genome\_Tile|1  
ACTAGTGATGTAAATGTTACAAATACCACTTCCTCTATACCTATGCATGGTTTTGCTACC  
>HPV42\_Alpha\_333211\_nt5541\_Genome\_Tile|1  
AAATACCACTTCCTCTATACCTATGCATGGTTTTGCTACCCCCCGTTTGCTCCACTACATC  
>HPV42\_Alpha\_333211\_nt5561\_Genome\_Tile|1  
CTATGCATGGTTTTGCTACCCCCCGTTTGCTCCACTACATCTTTCCCTACATTACCTAGCA  
>HPV42\_Alpha\_333211\_nt5601\_Genome\_Tile|1  
TTTCCCTACATTACCTAGCATGTCTACACATCTGCCAATACCACCATACCTTTTTTCGTT  
>HPV42\_Alpha\_333211\_nt5641\_Genome\_Tile|1  
ACCACCATACCTTTTTTCGTTTCCCTGCCACTGTGCATGTGGGCCCTGATTTATCTGTTGTG  
>HPV42\_Alpha\_333211\_nt5681\_Genome\_Tile|1  
GCCCTGATTTATCTGTTGTGGACCACCCATGGGACAGTACCCCAACGTCTGTAATGCCTC  
>HPV42\_Alpha\_333211\_nt7301\_Genome\_Tile|1  
GCTAAATCTGTTTCTTCAGCTAAACGTAAGAAAACACACAAATAGATGTATGTAGTAATG  
>HPV42\_Alpha\_333211\_nt7321\_Genome\_Tile|1  
TAAACGTAAGAAAACACACAAATAGATGTATGTAGTAATGTTATGATACATATTTATGTT  
>HPV42\_Alpha\_333211\_nt7481\_Genome\_Tile|1  
ATCTGGCCTGTTACCAGGTGCATTGGCCATGTTTCCTAACATTTTGCAAACCTATTCACT  
>HPV42\_Alpha\_333211\_nt7501\_Genome\_Tile|1  
CATTGGCCATGTTTCCTAACATTTTGCAAACCTATTCACTTTTTTAAATTTATAAATGCAA  
>HPV42\_Alpha\_333211\_nt7521\_Genome\_Tile|1  
ATTTTGCAAACCTATTCACTTTTTTAAATTTATAAATGCAATATGTGCTGCCAACTGTTTT  
>HPV42\_Alpha\_333211\_nt7541\_Genome\_Tile|1  
TTTTTAAATTTATAAATGCAATATGTGCTGCCAACTGTTTTATGGCACGTATGTTCTGCCA  
>HPV42\_Alpha\_333211\_nt7581\_Genome\_Tile|1  
ATGGCACGTATGTTCTGCCAACGTACACTCCCTAATTCCTTTACATAACACACACGCCTT  
>HPV42\_Alpha\_333211\_nt7601\_Genome\_Tile|1  
ACGTACACTCCCTAATTCCTTTACATAACACACACGCCTTTGCACAGGCATGTGCACAAA  
>HPV42\_Alpha\_333211\_nt7781\_Genome\_Tile|1  
GCATACACATTTACAAGTTACCTTGGCTTAAACAAGTAAAGTTATTTGTCACTGTTGACA  
>HPV42\_Alpha\_333211\_nt7801\_Genome\_Tile|1  
CCTTGGCTTAAACAAGTAAAGTTATTTGTCACTGTTGACACATTACTCATATATATAATT  
>HPV33\_Alpha\_333049\_nt0141\_Genome\_Tile|1  
ATTGCATGATTTGTGCCAAGCATTGGAGACAACTATACACAACATTGAACTACAGTGCGT  
>HPV33\_Alpha\_333049\_nt0261\_Genome\_Tile|1  
AGTTGTATATAGAGAGGGAAATCCATTTGGAATATGTAACTGTGTTTGCGGTTCTTATC  
>HPV33\_Alpha\_333049\_nt0281\_Genome\_Tile|1  
ATCCATTTGGAATATGTAACTGTGTTTGCGGTTCTTATCTAAAATTAGTGAATATAGAC  
>HPV33\_Alpha\_333049\_nt0541\_Genome\_Tile|1  
AGAGAACTGCACGTGTGACGTGTAAAAACGCCATGAGAGGACACAAGCCAACGTTAAAGG  
>HPV33\_Alpha\_333049\_nt1361\_Genome\_Tile|1  
TAGTGGGGTGGGGATGATTGAGAAGTAAGCTGTGAGACAAATGTAGATAGCTGTGAAAA  
>HPV33\_Alpha\_333049\_nt1401\_Genome\_Tile|1  
AATGTAGATAGCTGTGAAAATGTTACGTTGCAGGAAATTAGTAATGTTCTACATAGTAGT  
>HPV33\_Alpha\_333049\_nt1421\_Genome\_Tile|1  
TGTTACGTTGCAGGAAATTAGTAATGTTCTACATAGTAGTAATACAAAAGCAAATATATT

>HPV33\_Alpha\_333049\_nt1621\_Genome\_Tile|1  
TTAAACAGCATAGTTTGTATACTCATTTACAATGTTTAACTTGCGATAGAGGAATAATAA  
>HPV33\_Alpha\_333049\_nt3161\_Genome\_Tile|1  
ATATTATAGAGGAAGATACATGTACTATGGTTACAGGGAAAGTAGATTATATAGGTATGT  
>HPV33\_Alpha\_333049\_nt3181\_Genome\_Tile|1  
TGTACTATGGTTACAGGGAAAGTAGATTATATAGGTATGTATTATATACATAACTGTGAA  
>HPV33\_Alpha\_333049\_nt3461\_Genome\_Tile|1  
AGCCCCCTTACAAAGCTGTTCTGTGCAGACCCCGCCTTGGACAATAGAACAGCACGTACTG  
>HPV33\_Alpha\_333049\_nt3501\_Genome\_Tile|1  
CAATAGAACAGCACGTACTGCAACTAACTGCACAAACAAGCAGCGGACTGTGTGTAGTTC  
>HPV33\_Alpha\_333049\_nt3701\_Genome\_Tile|1  
ATGGAATTGTAACGTGAACATTTGTAACGAACAGCAACAACAAATGTTTTTAGGTACCG  
>HPV33\_Alpha\_333049\_nt3841\_Genome\_Tile|1  
ATTGTATATAACCATGATATTTGTTTTGTATTATGTTTTATATTGTTTTATGCTTATC  
>HPV33\_Alpha\_333049\_nt3861\_Genome\_Tile|1  
TTGTTTTTGTATTATGTTTTATATTGTTTTATGCTTATCCTTATTATTACGTCCTTTAA  
>HPV33\_Alpha\_333049\_nt3881\_Genome\_Tile|1  
ATATTGTTTTATGCTTATCCTTATTATTACGTCCTTTAATACTTTCCATTTCTACCTAT  
>HPV33\_Alpha\_333049\_nt3961\_Genome\_Tile|1  
ATTGCTGCTTTGGGTGTTTGTGGGATCTCCTTTAAAAATTTTTTTTTGCTATTTGTTGTT  
>HPV33\_Alpha\_333049\_nt4101\_Genome\_Tile|1  
TGTTTTGTATATATGTGCACATGGTGGTGTTTTAACATTGTTGTTGTTATTTTAGTTTTTT  
>HPV33\_Alpha\_333049\_nt4141\_Genome\_Tile|1  
TGTTGTTATTTTAGTTTTTTTTTTTTTTTGTATTACTAATAAATACCTTTATATTTTAGCAG  
>HPV33\_Alpha\_333049\_nt4161\_Genome\_Tile|1  
TTTTTTTTGTATTACTAATAAATACCTTTATATTTTAGCAGTGTATTATTATGAGACACAA  
>HPV33\_Alpha\_333049\_nt4401\_Genome\_Tile|1  
TTCAGGTGGAAGGACTGGCTATGTACCTATTGGTACTGACCCACCTACAGCTGCAATCCC  
>HPV33\_Alpha\_333049\_nt4421\_Genome\_Tile|1  
ATGTACCTATTGGTACTGACCCACCTACAGCTGCAATCCCCTTGCAGCCTATACGTCCTC  
>HPV33\_Alpha\_333049\_nt4441\_Genome\_Tile|1  
CCACCTACAGCTGCAATCCCCTTGCAGCCTATACGTCCTCCGGTTACTGTAGACACTGTT  
>HPV33\_Alpha\_333049\_nt5161\_Genome\_Tile|1  
ATTGGAGCTAGAATACATTATTATCAGGATTTAAGTCCTATTGTGCCTTTAGACCACACC  
>HPV33\_Alpha\_333049\_nt5181\_Genome\_Tile|1  
TTATCAGGATTTAAGTCCTATTGTGCCTTTAGACCACACCGTGCCAAATGAACAATATGA  
>HPV33\_Alpha\_333049\_nt5201\_Genome\_Tile|1  
TTGTGCCTTTAGACCACACCGTGCCAAATGAACAATATGAATTACAGCCTTTACATGATA  
>HPV33\_Alpha\_333049\_nt5221\_Genome\_Tile|1  
GTGCCAAATGAACAATATGAATTACAGCCTTTACATGATACTTCTACATCGTCTTATAGT  
>HPV33\_Alpha\_333049\_nt5321\_Genome\_Tile|1  
ATAATGTACACACCCCAATGCAACACTCATACAGTACGTTTGCAACAACACGTACCAGCA  
>HPV33\_Alpha\_333049\_nt5381\_Genome\_Tile|1  
ATGTGTCTATACCTTTAAATACAGGATTTGATACTCCTGTTATGTCTGGCCCTGATATAC  
>HPV33\_Alpha\_333049\_nt5401\_Genome\_Tile|1  
ACAGGATTTGATACTCCTGTTATGTCTGGCCCTGATATACCTTCCCCTTTATTTCCCACA  
>HPV33\_Alpha\_333049\_nt5461\_Genome\_Tile|1  
TCTAGCCCATTTGTTTCCTATTTTCGCCTTTTTTTCCTTTTGACACCATTGTTGTAGACGGT  
>HPV33\_Alpha\_333049\_nt5481\_Genome\_Tile|1  
TTCGCCTTTTTTCCTTTTGACACCATTGTTGTAGACGGTGCTGACTTTGTTTTACATCC  
>HPV33\_Alpha\_333049\_nt5721\_Genome\_Tile|1  
TTGCTGTTGGCCATCCATATTTTTCTATTAAAAATCCTACTAACGCTAAAAAATTATTGG  
>HPV33\_Alpha\_333049\_nt5741\_Genome\_Tile|1  
TTTTCTATTAAAAATCCTACTAACGCTAAAAAATTATTGGTACCCAAAGTATCAGGCTTG  
>HPV33\_Alpha\_333049\_nt6401\_Genome\_Tile|1

GCTGTTCCCGATAGACCTGTACATTAAAGGTTTCAGGAACACTACTGCCTTATTCAAAGCAGT  
>HPV33\_Alpha\_333049\_nt7121\_Genome\_Tile|1  
TTTTTGTTCTGTCTATGTACTTTGTGTTGTTGTGTTGTGTTGTTGTTGTTTTGTGTGA  
>HPV33\_Alpha\_333049\_nt7141\_Genome\_Tile|1  
TTTGTGTTGTTGTGTTGTGTTGTTGTTGTTGTTTTTGTGTATGTGTTACAATGTATGTTAT  
>HPV33\_Alpha\_333049\_nt7281\_Genome\_Tile|1  
ATGTTAATAAAAACATTGTGTGTATTTGGTTAAACTATTTGTATGTATGTTATGTATATGGG  
>HPV33\_Alpha\_333049\_nt7321\_Genome\_Tile|1  
ATGTATGTTATGTATATGGGTGTACCTATATGAGTAAGGAGTTGTATTGCTTGCCCTACC  
>HPV33\_Alpha\_333049\_nt7341\_Genome\_Tile|1  
TGTACCTATATGAGTAAGGAGTTGTATTGCTTGCCCTACCCTGCATTGCAATGTACCTAC  
>HPV33\_Alpha\_333049\_nt7361\_Genome\_Tile|1  
GTTGTATTGCTTGCCCTACCTGCATTGCAATGTACCTACCTTTATTTCCCTATATTTGT  
>HPV33\_Alpha\_333049\_nt7381\_Genome\_Tile|1  
CTGCATTGCAATGTACCTACCTTTATTTCCCTATATTGTAGTAGCTACCTACATGTTTAGTAT  
>HPV33\_Alpha\_333049\_nt7401\_Genome\_Tile|1  
CTTTATTTCCCTATATTTGTAGTAGCTACCTACATGTTTAGTATTGCTTTACCTTTTGACATAC  
>HPV33\_Alpha\_333049\_nt7421\_Genome\_Tile|1  
AGTACCTACATGTTTAGTATTGCTTTACCTTTTGACATACTAGTGTCCATATTGTACAAT  
>HPV33\_Alpha\_333049\_nt7441\_Genome\_Tile|1  
TGCTTTACCTTTTGACATACTAGTGTCCATATTGTACAATTTCCCTCCATTTTGTATGCCCT  
>HPV33\_Alpha\_333049\_nt7521\_Genome\_Tile|1  
CATACATACCCTATGACATTGGCAGAACAGTTAATCCTTTTCTTTCCCTGCACCTGTGTTTG  
>HPV33\_Alpha\_333049\_nt7561\_Genome\_Tile|1  
TCTTTCCCTGCACCTGTGTTTGTCTGTACTTGCTGCATTGGCATAACATACCCTATGACATTG  
>HPV33\_Alpha\_333049\_nt7601\_Genome\_Tile|1  
ATACATACCCTATGACATTGGCAGAACAGTTAATCCTTTTCTTTCCCTGCACCTGTGTTTGT  
>HPV31\_Alpha\_333048\_nt0081\_Genome\_Tile|1  
AGTATTTTGTGCAAACCTACAGACGCCATGTTCAAAAAATCCTGCAGAAAGACCTCGGAAA  
>HPV31\_Alpha\_333048\_nt0101\_Genome\_Tile|1  
AGACGCCATGTTCAAAAAATCCTGCAGAAAGACCTCGGAAATTGCATGAACCTAACGCTCGGC  
>HPV31\_Alpha\_333048\_nt0121\_Genome\_Tile|1  
CTGCAGAAAGACCTCGGAAATTGCATGAACCTAACGCTCGGAAATACCTACGATG  
>HPV31\_Alpha\_333048\_nt0141\_Genome\_Tile|1  
TTGCATGAACCTAACGCTCGGCAATTGGAAATACCTACGATGAACCTAACGATTGAATTGTGTCT  
>HPV31\_Alpha\_333048\_nt0161\_Genome\_Tile|1  
ATTGGAAATACCTACGATGAACCTAACGATTGAATTGTGTCTACTGCAAAGGTCAGTTAAC  
>HPV31\_Alpha\_333048\_nt0181\_Genome\_Tile|1  
AACTAAGATTGAATTGTGTCTACTGCAAAGGTCAGTTAACAGAAACAGAGGTATTAGATT  
>HPV31\_Alpha\_333048\_nt0441\_Genome\_Tile|1  
CCAGAAGAAAAACAAAGACATTTGGATAAAAAGAAACGATTCCACAACATAGGAGGAAGG  
>HPV31\_Alpha\_333048\_nt0461\_Genome\_Tile|1  
TTTGGATAAAAAGAAACGATTCCACAACATAGGAGGAAGGTGGACAGGACGTTGCATAGC  
>HPV31\_Alpha\_333048\_nt0481\_Genome\_Tile|1  
TCCACAACATAGGAGGAAGGTGGACAGGACGTTGCATAGCATGTTGGAGAAGACCTCGTA  
>HPV31\_Alpha\_333048\_nt0501\_Genome\_Tile|1  
TGGACAGGACGTTGCATAGCATGTTGGAGAAGACCTCGTACTGAAACCCAAGTGTAAACA  
>HPV31\_Alpha\_333048\_nt0701\_Genome\_Tile|1  
GACACATCCAATTACAATATCGTTACCTTTTGTGTGTGTCAGTGTAAAGTCTACACTTCGTTTG  
>HPV31\_Alpha\_333048\_nt0741\_Genome\_Tile|1  
GTAAGTCTACACTTCGTTTGTGTGTACAGAGCACACAAGTAGATATTCGCATATTGCAAG  
>HPV31\_Alpha\_333048\_nt0981\_Genome\_Tile|1  
TAGTGATACCTGGGGAGGATATGGTTGACTTTATTGACAATTGTAATGTATACAACAATCA  
>HPV31\_Alpha\_333048\_nt1161\_Genome\_Tile|1  
TGTGGATTATAATATTAGTCCACGGTTAAAAGCTATATGCATAGAAAATAACAGTAAAA



>HPV31\_Alpha\_333048\_nt1281\_Genome\_Tile|1  
GCAGCAGATGGTACAGGTAGAGGAGCAACAAACAACATTAAGTTGTAATGGTAGTGACGG  
>HPV31\_Alpha\_333048\_nt1301\_Genome\_Tile|1  
AGGAGCAACAAACAACATTAAGTTGTAATGGTAGTGACGGGACACATAGTGAACGAGAGA  
>HPV31\_Alpha\_333048\_nt1321\_Genome\_Tile|1  
AGTTGTAATGGTAGTGACGGGACACATAGTGAACGAGAGAATGAAACTCCAACACGTAAT  
>HPV31\_Alpha\_333048\_nt1341\_Genome\_Tile|1  
GACACATAGTGAACGAGAGAATGAAACTCCAACACGTAATATATTGCAAGTGTTAAAAAC  
>HPV31\_Alpha\_333048\_nt1361\_Genome\_Tile|1  
ATGAAACTCCAACACGTAATATATTGCAAGTGTTAAAAACTAGCAATGGTAAAGCTGCTA  
>HPV31\_Alpha\_333048\_nt1461\_Genome\_Tile|1  
GGAAC TAATTAGGCCATTTCAAAGCAATAAAAGCACATGTACTGATTGGTGTGTAGCTGC  
>HPV31\_Alpha\_333048\_nt1581\_Genome\_Tile|1  
GTATTGCCATTTACAAAGTTTAGCATGTTCCCTGGGGCATGGTTATGTTAATGCTTGTGAG  
>HPV31\_Alpha\_333048\_nt1681\_Genome\_Tile|1  
TTAGAAAAATTATTGTGTATATCTACAAATTGTATGTTAATTCAGCCACCCAAATTACGT  
>HPV31\_Alpha\_333048\_nt2381\_Genome\_Tile|1  
CATGTTGGCATTATATAGACAATTACCTACGAAATGCACTAGATGGCAACCCTGTATCTA  
>HPV31\_Alpha\_333048\_nt2461\_Genome\_Tile|1  
TTAATGCAGTTAAAATGTCCTCCTTTATTGATTACATCTAATATAAATGCAGGTAAGGAT  
>HPV31\_Alpha\_333048\_nt2761\_Genome\_Tile|1  
TAAACGACTTTGTGATCATATAGACTATTGGAAACATATTCGACTTGAATGTGTATTAAT  
>HPV31\_Alpha\_333048\_nt2901\_Genome\_Tile|1  
TACAAGCTATTGAACTACAAATGATGTTGGAAACATTAAATAACACTGAATACAAAAATG  
>HPV31\_Alpha\_333048\_nt2921\_Genome\_Tile|1  
ATGATGTTGGAAACATTAAATAACACTGAATACAAAAATGAGGACTGGACAATGCAGCAA  
>HPV31\_Alpha\_333048\_nt2941\_Genome\_Tile|1  
TAACACTGAATACAAAAATGAGGACTGGACAATGCAGCAAACAAGTCTTGAAGTGTATTT  
>HPV31\_Alpha\_333048\_nt3021\_Genome\_Tile|1  
TAAAAAAACATGGATATACTGTAGAGGTGCAATTTGATGGTGATGTACACAACACCATGC  
>HPV31\_Alpha\_333048\_nt3101\_Genome\_Tile|1  
ATATACCTATGTATAGATGGCCAATGTACTGTTGTGGAAGGGCAAGTTAATTGTAAGGGC  
>HPV31\_Alpha\_333048\_nt3121\_Genome\_Tile|1  
CCAATGTACTGTTGTGGAAGGGCAAGTTAATTGTAAGGGCATTTATTATGTACATGAAGG  
>HPV31\_Alpha\_333048\_nt3141\_Genome\_Tile|1  
GGCAAGTTAATTGTAAGGGCATTTATTATGTACATGAAGGACATATAACATATTTTGTAA  
>HPV31\_Alpha\_333048\_nt3161\_Genome\_Tile|1  
ATTTATTATGTACATGAAGGACATATAACATATTTTGTAAATTTTACAGAAGAGGCAAAA  
>HPV31\_Alpha\_333048\_nt3181\_Genome\_Tile|1  
ACATATAACATATTTTGTAAATTTTACAGAAGAGGCAAAAAATATGGGACTGGTAAAAA  
>HPV31\_Alpha\_333048\_nt3301\_Genome\_Tile|1  
CGAAATATCCTTTGCTGGGATTGTTACAAAGCTACCAACAGCCAACAACACCACCACATC  
>HPV31\_Alpha\_333048\_nt3481\_Genome\_Tile|1  
AGGCGACTCCGTGGACAGTGTCAACTGTGGGGTTATCAGTGCAGCTGCATGCACAAACCA  
>HPV31\_Alpha\_333048\_nt3501\_Genome\_Tile|1  
TCAACTGTGGGGTTATCAGTGCAGCTGCATGCACAAACCAACAAGGGCTGTCAGTTGTC  
>HPV31\_Alpha\_333048\_nt3781\_Genome\_Tile|1  
ATCAGTGTCAACAGGATATATGACTATTTAGCCTAATGATTGAACTAAATATTTCTACAG  
>HPV31\_Alpha\_333048\_nt3881\_Genome\_Tile|1  
ACTATTTGTGTGCTTGTGCATACGTCCACTGTGTGCTGTCTGTGTCGGTATATGCAACACT  
>HPV31\_Alpha\_333048\_nt3901\_Genome\_Tile|1  
TACGTCCACTTGTGCTGTCTGTGTGCGGTATATGCAACACTACTATTATTAATTGTGATTT  
>HPV31\_Alpha\_333048\_nt3921\_Genome\_Tile|1  
GTGTGCGGTATATGCAACACTACTATTATTAATTGTGATTTTATGGGTTATTGCAACCTCT  
>HPV31\_Alpha\_333048\_nt3941\_Genome\_Tile|1

ACTATTATTAATTGTGATTTTATGGGTTATTGCAACCTCTCCATTACGTTGTTTTTGTAT  
>HPV31\_Alpha\_333048\_nt4001\_Genome\_Tile|1  
ATATGTTGTGTTTATATATATTCCATTATTTGTAATTCATACACATGCATCTTTTTTAAG  
>HPV31\_Alpha\_333048\_nt4021\_Genome\_Tile|1  
TTCCATTATTTGTAATTCATACACATGCATCTTTTTTAAGTCAACAGTAACTTTTTTACT  
>HPV31\_Alpha\_333048\_nt4041\_Genome\_Tile|1  
ACACATGCATCTTTTTTAAGTCAACAGTAACTTTTTTACTTGTGTATACTGTTGTTTGTA  
>HPV31\_Alpha\_333048\_nt4101\_Genome\_Tile|1  
TTGGTATTGGTATTGGTATTGGTATTGGTATTGGTATAATAAACTTTTTTACTTTTTTTT  
>HPV31\_Alpha\_333048\_nt4141\_Genome\_Tile|1  
AAACTTTTTTACTTTTTTTTTTATTATTACCATGCGGTCCAAACGCTCTACAAAACGCACT  
>HPV31\_Alpha\_333048\_nt4241\_Genome\_Tile|1  
CAGCAGGTACTTGTCCATCAGACGTTATACCTAAAATAGAACATACTACCATTCGAGACC  
>HPV31\_Alpha\_333048\_nt4261\_Genome\_Tile|1  
GACGTTATACCTAAAATAGAACATACTACCATTCGAGACCAAATATTAAGGTATGGTAGT  
>HPV31\_Alpha\_333048\_nt4361\_Genome\_Tile|1  
CTGGTACTGGGGTTCGCACTGGATATGTCCCTCTTAGTACACGTCCTTCTACAGTATCTG  
>HPV31\_Alpha\_333048\_nt4381\_Genome\_Tile|1  
GGATATGTCCCTCTTAGTACACGTCCTTCTACAGTATCTGAGGCAAGTATACCTATTAGA  
>HPV31\_Alpha\_333048\_nt4401\_Genome\_Tile|1  
ACGTCCTTCTACAGTATCTGAGGCAAGTATACCTATTAGACCACAGTTAGCATTGACCC  
>HPV31\_Alpha\_333048\_nt4441\_Genome\_Tile|1  
CCACCAGTTAGCATTGACCCTGTAGGTCCCTTGGACCCCTCTATAGTAAGTCTTGTTGAA  
>HPV31\_Alpha\_333048\_nt4481\_Genome\_Tile|1  
CTATAGTAAGTCTTGTTGAAGAATCTGGAATTGTTGATGTTGGTGCCCTGCTCCTATAC  
>HPV31\_Alpha\_333048\_nt4501\_Genome\_Tile|1  
GAATCTGGAATTGTTGATGTTGGTGCCCTGCTCCTATACCACACCCCTCCTACAACATCT  
>HPV31\_Alpha\_333048\_nt4561\_Genome\_Tile|1  
GGGTTTGACATTGCTACAACCTGCAGACACAACACCTGCAATTTTAGATGTAACAAGTGTT  
>HPV31\_Alpha\_333048\_nt4841\_Genome\_Tile|1  
GTAAGGCTACACAACAAGTAAAAGTTATTGATCCAACGTTTCTTAGTGCTCCAAAACAGC  
>HPV31\_Alpha\_333048\_nt4861\_Genome\_Tile|1  
AAAGTTATTGATCCAACGTTTCTTAGTGCTCCAAAACAGCTAATTACATATGAAAACCCT  
>HPV31\_Alpha\_333048\_nt4881\_Genome\_Tile|1  
TCTTAGTGCTCCAAAACAGCTAATTACATATGAAAACCCTGCCTATGAAACTGTAAATGC  
>HPV31\_Alpha\_333048\_nt4901\_Genome\_Tile|1  
TAATTACATATGAAAACCCTGCCTATGAAACTGTAAATGCTGAAGAATCTTTATACTTTT  
>HPV31\_Alpha\_333048\_nt4921\_Genome\_Tile|1  
GCCTATGAAACTGTAAATGCTGAAGAATCTTTATACTTTTCCAATACATCGCATAATATA  
>HPV31\_Alpha\_333048\_nt4941\_Genome\_Tile|1  
TGAAGAATCTTTATACTTTTCCAATACATCGCATAATATAGCCCTGATCCCGACTTTCT  
>HPV31\_Alpha\_333048\_nt5141\_Genome\_Tile|1  
GTAGTATTAATCCTGCAGGTGAAAGTATTGAAATGCAACCTTTAGGGGCGTCTGCAACTA  
>HPV31\_Alpha\_333048\_nt5161\_Genome\_Tile|1  
GAAAGTATTGAAATGCAACCTTTAGGGGCGTCTGCAACTACTACTTCTACTTTAAATGAT  
>HPV31\_Alpha\_333048\_nt5201\_Genome\_Tile|1  
CTACTTCTACTTTAAATGATGGCTTATATGACATTTATGCAGACACTGATTTTACTGTGG  
>HPV31\_Alpha\_333048\_nt5221\_Genome\_Tile|1  
GGCTTATATGACATTTATGCAGACACTGATTTTACTGTGGATACACCTGCCACACATAAT  
>HPV31\_Alpha\_333048\_nt5241\_Genome\_Tile|1  
AGACACTGATTTTACTGTGGATACACCTGCCACACATAATGTTTCCCCTTCTACTGCTGT  
>HPV31\_Alpha\_333048\_nt5361\_Genome\_Tile|1  
AGGTTTTTGACATTCCCATATTTTCTGGGCCCTGATGTACCTATAGAGCATGCACCTACACA  
>HPV31\_Alpha\_333048\_nt5401\_Genome\_Tile|1  
ATAGAGCATGCACCTACACAGGTTTTCCCATTTCTTTTGGCCCCTACAACGCCACAAGTG

>HPV31\_Alpha\_333048\_nt5421\_Genome\_Tile|1  
GGTTTTCCCATTTTCCTTTGGCCCCCTACAACGCCACAAGTGTCTATTTTTGTTGATGGGGG  
>HPV31\_Alpha\_333048\_nt5681\_Genome\_Tile|1  
ACAGTAGGCCATCCATATTATTCCATACCTAAATCTGACAATCCTAAAAAATAGTTGTA  
>HPV31\_Alpha\_333048\_nt5941\_Genome\_Tile|1  
TGAAAACCTCTAATAGATATGCCGGTGGTCCCTGGCACTGATAATAGGGAATGTATATCAAT  
>HPV31\_Alpha\_333048\_nt6041\_Genome\_Tile|1  
CCACCTATTGGAGAGCATTGGGGTAAAGGTAGTCCTTGTAGTAACAATGCTATTACCCCT  
>HPV31\_Alpha\_333048\_nt6061\_Genome\_Tile|1  
GGGTAAAGGTAGTCCTTGTAGTAACAATGCTATTACCCCTGGTGATTGTCCTCCATTAGA  
>HPV31\_Alpha\_333048\_nt6381\_Genome\_Tile|1  
ATATTAAAGGCTCCGGTTCAACAGCTACTTTAGCTAACAGTACATACTTTCCTACACCTA  
>HPV31\_Alpha\_333048\_nt6401\_Genome\_Tile|1  
ACAGCTACTTTAGCTAACAGTACATACTTTCCTACACCTAGCGGCTCCATGGTTACTTCA  
>HPV31\_Alpha\_333048\_nt6941\_Genome\_Tile|1  
CCACTGGGTCGCAAATTTTTATTACAGGCAGGATATAGGGCACGTCTAAATTTAAAGCA  
>HPV31\_Alpha\_333048\_nt7001\_Genome\_Tile|1  
GGTAAACGTAGTGCACCCTCAGCATCTACCACTACACCAGCAAAACGTAAAAAACTAAA  
>HPV31\_Alpha\_333048\_nt7041\_Genome\_Tile|1  
CAAAACGTAAAAAACTAAAAAGTAATGGATGTGTATGTAATACATGTGTCTGTATGTGT  
>HPV31\_Alpha\_333048\_nt7061\_Genome\_Tile|1  
AAGTAATGGATGTGTATGTAATACATGTGTCTGTATGTGTATGTGCTTGTGCTGTATTGT  
>HPV31\_Alpha\_333048\_nt7121\_Genome\_Tile|1  
ATATGTGTGTGTTTGTGTGTTATATATGGTATATGTATGTTTATGTATGCGTGTGTACTT  
>HPV31\_Alpha\_333048\_nt7141\_Genome\_Tile|1  
TATATATGGTATATGTATGTTTATGTATGCGTGTGTACTTGTATATATGTATAGTATGTT  
>HPV31\_Alpha\_333048\_nt7161\_Genome\_Tile|1  
TTATGTATGCGTGTGTACTTGTATATATGTATAGTATGTTATGTGTGTATGTATGCTATG  
>HPV31\_Alpha\_333048\_nt7241\_Genome\_Tile|1  
TACCTGTGTGTGTTGTGTATGTTGTCTTATATACACCCTATTAGTAACATACTATTACT  
>HPV31\_Alpha\_333048\_nt7261\_Genome\_Tile|1  
GTTGTCTTATATACACCCTATTAGTAACATACTATTACTATTTTATAAACTATTGTTCC  
>HPV31\_Alpha\_333048\_nt7281\_Genome\_Tile|1  
ATTAGTAACATACTATTACTATTTTATAAACTATTGTTTCTACTTGTTCCTACTTGTTC  
>HPV31\_Alpha\_333048\_nt7301\_Genome\_Tile|1  
ATTTTATAAACTATTGTTTCTACTTGTTCCTACTTGTTCCTGCTCCTCCCAATAGTCATG  
>HPV31\_Alpha\_333048\_nt7321\_Genome\_Tile|1  
TACTTGTTCCTACTTGTTCCTGCTCCTCCCAATAGTCATGTACTTATTTCTGCCTATAAT  
>HPV31\_Alpha\_333048\_nt7341\_Genome\_Tile|1  
TGCTCCTCCCAATAGTCATGTACTTATTTCTGCCTATAATTTAGGTGTCACGCCATAGTA  
>HPV31\_Alpha\_333048\_nt7381\_Genome\_Tile|1  
TTAGGTGTCACGCCATAGTAAAAGTTGTACACCCGGTCCGTTTTTTGCAACTAAAGCTAC  
>HPV31\_Alpha\_333048\_nt7421\_Genome\_Tile|1  
TTTTTTGCAACTAAAGCTACTCCATTTTGATTTTATGCAGCCATTTTAAATCCCTAACCG  
>HPV31\_Alpha\_333048\_nt7501\_Genome\_Tile|1  
ACATGCTAGTACAACATATGCTGATGCAGTAGTTCTGCGGTTTTTGGTTTCCTGAATACTA  
>HPV31\_Alpha\_333048\_nt7561\_Genome\_Tile|1  
GTTTTTGCCAACATTCTGGCTTGTAGTTTCCTGCCTAACACACCTTGCCAACATATAATC  
>HPV31\_Alpha\_333048\_nt7621\_Genome\_Tile|1  
CAGTCCAACCTTGCAATTATACTATGAATCATGTTTGTTTAAATACAACCTGTAGTTCAAC  
>HPV31\_Alpha\_333048\_nt7641\_Genome\_Tile|1  
ACTATGAATCATGTTTGTTTAAATACAACCTGTAGTTCAACTATGTGTCATGCACATATAT  
>HPV31\_Alpha\_333048\_nt7661\_Genome\_Tile|1  
AAATACAACCTGTAGTTCAACTATGTGTCATGCACATATATTATATTATCCTACACACCTT  
>HPV31\_Alpha\_333048\_nt7761\_Genome\_Tile|1

CTTGATTGCAGTGGCTTTTGCACATGTTTAACTGCCAAGGTTGTGTCATGCATTAT  
>HPV31\_Alpha\_333048\_nt7781\_Genome\_Tile|1  
TTGCACATGTTTAACTGCCAAGGTTGTGTCATGCATTATAAATAAGTTGTATGTTACTC  
>HPV31\_Alpha\_333048\_nt7801\_Genome\_Tile|1  
AAGGTTGTGTCATGCATTATAAATAAGTTGTATGTTACTCATATAATTAATTGCATATAG  
>HPV31\_Alpha\_333048\_nt7821\_Genome\_Tile|1  
AAATAAGTTGTATGTTACTCATATAATTAATTGCATATAGGTATTACACCGTTTTTCGGTT  
>HPV11\_Alpha\_333026\_nt0221\_Genome\_Tile|1  
CGCAGAGATATATGCATATGCCTATAAGAACCCTAAAGGTTGTGTGGCGAGACAACCTTCC  
>HPV11\_Alpha\_333026\_nt0361\_Genome\_Tile|1  
CTACAGTAGAAGAAGAAACCAATGAAGATATTTTAAAAGTGTTAATTCGTTGTTACCTGT  
>HPV11\_Alpha\_333026\_nt0421\_Genome\_Tile|1  
GTCACAAGCCGTTGTGTGAAATAGAAAACTAAAGCACATATTGGGAAAGGCACGCTTCA  
>HPV11\_Alpha\_333026\_nt0441\_Genome\_Tile|1  
ATAGAAAACTAAAGCACATATTGGGAAAGGCACGCTTCATAAACTAAATAACCAGTGG  
>HPV11\_Alpha\_333026\_nt1401\_Genome\_Tile|1  
AGACACATCAGGAATATTAGAATTACTAAAATGTAAGGATATACGATCTACATTACATGG  
>HPV11\_Alpha\_333026\_nt2081\_Genome\_Tile|1  
AAATGAAAAAGATGTCTATTAAACAATGGATTAAGTATAGGGGTACTAAAGTTGACAGTG  
>HPV11\_Alpha\_333026\_nt2121\_Genome\_Tile|1  
GGGTACTAAAGTTGACAGTGTAGGTAAGTGAAGCCAATTGTGCAGTTTCTAAGACATCA  
>HPV11\_Alpha\_333026\_nt2501\_Genome\_Tile|1  
TAATTAAGTGTCACCGCTACTGGTTACATCAAATATAGACATTAGCAAAGAGGAGAAAT  
>HPV11\_Alpha\_333026\_nt2961\_Genome\_Tile|1  
AATCCTTAGCAAAAACCTCAGTATGGTGTGGAACCTTGGACATTACAGGACACCAGTTATG  
>HPV11\_Alpha\_333026\_nt3121\_Genome\_Tile|1  
ATGGACACATATATACCTGCAGGACAACGACTCATGGGTAAAAGTAACTAGTTCCGTAGA  
>HPV11\_Alpha\_333026\_nt3141\_Genome\_Tile|1  
AGGACAACGACTCATGGGTAAAAGTAACTAGTTCCGTAGATGCCAAGGGCATATATTATA  
>HPV11\_Alpha\_333026\_nt3921\_Genome\_Tile|1  
ATTGCCTGTTGTTATTGCATTTGCAGTATGTATTCTTAGTATTGTACTTATAATATTAAT  
>HPV11\_Alpha\_333026\_nt3941\_Genome\_Tile|1  
TTGCAGTATGTATTCTTAGTATTGTACTTATAATATTAATATCTGATTTTGTAGTATATA  
>HPV11\_Alpha\_333026\_nt3961\_Genome\_Tile|1  
ATTGTACTTATAATATTAATATCTGATTTTGTAGTATATACATCTGTGCTGGTACTAACA  
>HPV11\_Alpha\_333026\_nt4101\_Genome\_Tile|1  
TCCTGCCTTTTATATACACATATACATTGTGCAAACGCAACAATAATGGTGATGTTAACC  
>HPV11\_Alpha\_333026\_nt4121\_Genome\_Tile|1  
TATACATTGTGCAAACGCAACAATAATGGTGATGTTAACCTGTCACTTAAATGATGGTGA  
>HPV11\_Alpha\_333026\_nt4221\_Genome\_Tile|1  
GCTGTACTTGGATTGTTGTTACTACATTACAGGGCTGTACATGGTACTGAAAAAACTAAA  
>HPV11\_Alpha\_333026\_nt4241\_Genome\_Tile|1  
ACTACATTACAGGGCTGTACATGGTACTGAAAAAACTAAATGTGCTAAGTGTAATCAAA  
>HPV11\_Alpha\_333026\_nt4261\_Genome\_Tile|1  
ATGGTACTGAAAAAACTAAATGTGCTAAGTGTAATCAAACCGCAATACTACTGTGGATT  
>HPV11\_Alpha\_333026\_nt4281\_Genome\_Tile|1  
TGTGCTAAGTGTAATCAAACCGCAATACTACTGTGGATTATGTGTATATGTCACATGGT  
>HPV11\_Alpha\_333026\_nt4301\_Genome\_Tile|1  
CCGCAATACTACTGTGGATTATGTGTATATGTCACATGGTGATAATGGAGATTATGTGTA  
>HPV11\_Alpha\_333026\_nt4321\_Genome\_Tile|1  
ATGTGTATATGTCACATGGTGATAATGGAGATTATGTGTACATGAACTAGAGTAAACCTT  
>HPV11\_Alpha\_333026\_nt4361\_Genome\_Tile|1  
CATGAACTAGAGTAAACCTTTTTTATACAGTGTGTGGTGTACGTTAGTTATATATAATGA  
>HPV11\_Alpha\_333026\_nt4601\_Genome\_Tile|1  
CTGGTAGTGGCGTTCGTGCAGGGTATATACCCCTGGGAAGCTCTCCCAAGCCTGCTATTA

>HPV11\_Alpha\_333026\_nt4641\_Genome\_Tile|1  
CTCTCCCAAGCCTGCTATTACTGGGGGCCAGCAGCACGTCCGCCAGTGCTTGTGGAGCC  
>HPV11\_Alpha\_333026\_nt4761\_Genome\_Tile|1  
TGGTGCACCTGAGGTGGTACCCCTACACAGGTGGCTTTACTATAACATCATCTGAATC  
>HPV11\_Alpha\_333026\_nt4781\_Genome\_Tile|1  
CCCCTACACAGGTGGCTTTACTATAACATCATCTGAATCGACTACACCTGCTATTTTAG  
>HPV11\_Alpha\_333026\_nt4841\_Genome\_Tile|1  
ATGTGTCTGTTACCAATCACACTACCACTAGTGTGTTTCAAATCCCCCTGTTTACAGAAC  
>HPV11\_Alpha\_333026\_nt5141\_Genome\_Tile|1  
CACAGCGATTGGTAACCTTATGACAACCTGTCTATGAAGGAGAAGATGTAAGTTTACAAT  
>HPV11\_Alpha\_333026\_nt5161\_Genome\_Tile|1  
GACAACCTGTCTATGAAGGAGAAGATGTAAGTTTACAATTTACCCATGAGTCTATCCAC  
>HPV11\_Alpha\_333026\_nt5181\_Genome\_Tile|1  
AGAAGATGTAAGTTTACAATTTACCCATGAGTCTATCCACAATGCACCTGATGAAGCATT  
>HPV11\_Alpha\_333026\_nt5201\_Genome\_Tile|1  
TTACCCATGAGTCTATCCACAATGCACCTGATGAAGCATTATGGATATTATTAGACTAC  
>HPV11\_Alpha\_333026\_nt5441\_Genome\_Tile|1  
ATGACACGTTTGATATTTATGCTGAACCATTTGACCCTATCCCTGACCCTGTCCAACATT  
>HPV11\_Alpha\_333026\_nt5461\_Genome\_Tile|1  
GCTGAACCATTTGACCCTATCCCTGACCCTGTCCAACATTCTGTTACACAGTCTTATCTT  
>HPV11\_Alpha\_333026\_nt5501\_Genome\_Tile|1  
CTGTTACACAGTCTTATCTTACCTCCACACCTAATACCCTTTCACAATCGTGGGGTAATA  
>HPV11\_Alpha\_333026\_nt7221\_Genome\_Tile|1  
CTGTGTCTAAGCCCTCTACAGCCCCCAAACGAAAACGTACCAAAACCAAAAAGTAATATA  
>HPV11\_Alpha\_333026\_nt7301\_Genome\_Tile|1  
TATTTATATGTTGTTGTAGTGTGTATATGTTTCTTGTATTGTGTATATGTGTATATGTTT  
>HPV11\_Alpha\_333026\_nt7401\_Genome\_Tile|1  
GTTTGTGTGTTTAGTGTGTGTATATATTTGTGGAATGTGTATGTATGTTTTGTGCAATA  
>HPV11\_Alpha\_333026\_nt7441\_Genome\_Tile|1  
ATGTATGTTTTGTGCAATAAACAATTATTATGTGTGTCCTGTTACACCCAGTGACTAAG  
>HPV11\_Alpha\_333026\_nt7521\_Genome\_Tile|1  
TTGTGTTGCCTTCATATTATATTATATATATTTGTAATATACCTATACTATGTTACCCCC  
>HPV11\_Alpha\_333026\_nt7641\_Genome\_Tile|1  
TGTTTTGTACTAATCCCATATGTTGTGTGCCAAGGTACATATTGCCCTGCCAAGTATCTT  
>HPV11\_Alpha\_333026\_nt7681\_Genome\_Tile|1  
ATTGCCCTGCCAAGTATCTTGCCAACAACACACCTGGCCAGGGCGCGGTATTGCATGACT  
>HPV11\_Alpha\_333026\_nt7701\_Genome\_Tile|1  
GCCAACAAACACACCTGGCCAGGGCGCGGTATTGCATGACTAATGTACAATAAACCTGTGCG  
>HPV11\_Alpha\_333026\_nt7741\_Genome\_Tile|1  
AATGTACAATAAACCTGTGCGTTTGTACAATGTTGTGGATTGCAGCCAAAGGTTAAAAGC  
>HPV11\_Alpha\_333026\_nt7761\_Genome\_Tile|1  
GTTTGTACAATGTTGTGGATTGCAGCCAAAGGTTAAAAGCATTTTGGCTTCTAGCTGAA  
>HPV16\_Alpha\_9627100\_nt0081\_Genome\_Tile\_rc|1  
GTAACCTTCTGGGTCGCTCCTGTGGGTCCTGAAACATTGCAGTTCTCTTTTGGTGCATAA  
>HPV16\_Alpha\_9627100\_nt0101\_Genome\_Tile\_rc|1  
CAGCTCTGTGCATAACTGTGGTAACTTCTGGGTCGCTCCTGTGGGTCCTGAAACATTGC  
>HPV16\_Alpha\_9627100\_nt0121\_Genome\_Tile\_rc|1  
ATATCATGTATAGTTGTTTGAGCTCTGTGCATAACTGTGGTAACTTCTGGGTCGCTCC  
>HPV16\_Alpha\_9627100\_nt0141\_Genome\_Tile\_rc|1  
AGTACACACATTCTAATATTATATCATGTATAGTTGTTTGCAGCTCTGTGCATAACTGTG  
>HPV16\_Alpha\_9627100\_nt0161\_Genome\_Tile\_rc|1  
TCGAGTAACCTGTTGCTTGCAGTACACACATTCTAATATTATATCATGTATAGTTGTTTG  
>HPV16\_Alpha\_9627100\_nt0201\_Genome\_Tile\_rc|1  
CTATGCATAAATCCCGAAAAGCAAAGTCATATACCTCACGTGCGAGTAACCTGTTGCTTGC  
>HPV16\_Alpha\_9627100\_nt0241\_Genome\_Tile\_rc|1

CATTTATCACATACAGCATATGGATTCCCATCTCTATATACTATGCATAAAATCCCGAAAA  
>HPV16\_Alpha\_9627100\_nt0301\_Genome\_Tile\_rc|1  
GTTCCATACAAACTATAACAATAATGTCTATACTACTAATTTTAGAATAAAACTTTAAA  
>HPV16\_Alpha\_9627100\_nt0441\_Genome\_Tile\_rc|1  
TCCACCGACCCCTTATATTATGGAATCTTTGCTTTTTGTCCAGATGTCTTTGCTTTTCTT  
>HPV16\_Alpha\_9627100\_nt0461\_Genome\_Tile\_rc|1  
ACAAGACATACATCGACCGGTCCACCGACCCCTTATATTATGGAATCTTTGCTTTTTGTCT  
>HPV16\_Alpha\_9627100\_nt0481\_Genome\_Tile\_rc|1  
CGTGTTCTTGATGATCTGCAACAAGACATACATCGACCGGTCCACCGACCCCTTATATTA  
>HPV16\_Alpha\_9627100\_nt0741\_Genome\_Tile\_rc|1  
TCCAAAGTACGAATGTCTACGTGTGTGCTTTGTACGCACAACCGAAGCGTAGAGTCACAC  
>HPV16\_Alpha\_9627100\_nt1021\_Genome\_Tile\_rc|1  
AGTAAACAACGCATGTGCTGTCTCTGTTTCTGCCTGTGTTAAATAATCATTCATTTAC  
>HPV16\_Alpha\_9627100\_nt1061\_Genome\_Tile\_rc|1  
GAACCTGTACTGCATCTCTATGTTGTTTTGCTTCCTGTGCAGTAAACAACGCATGTGCTG  
>HPV16\_Alpha\_9627100\_nt1101\_Genome\_Tile\_rc|1  
ACTAATATCACTAAGTGGACTACCAAATACTTTCGTTTTAGAACCTGTACTGCATCTCTA  
>HPV16\_Alpha\_9627100\_nt1121\_Genome\_Tile\_rc|1  
ATATTATTGTCTACACATCCACTAATATCACTAAGTGGACTACCAAATACTTTCGTTTTTA  
>HPV16\_Alpha\_9627100\_nt1281\_Genome\_Tile\_rc|1  
CTGACTACATGGTGTTCAGTCTCATGGCGCCCTTCTACCTGTAAACATCTGCTGAGTTTC  
>HPV16\_Alpha\_9627100\_nt1301\_Genome\_Tile\_rc|1  
CCCCCACTTCCACCCTATACTGACTACATGGTGTTCAGTCTCATGGCGCCCTTCTACC  
>HPV16\_Alpha\_9627100\_nt1381\_Genome\_Tile\_rc|1  
TTGTAAAGTGGTGTTCGGCATATAGTGTGCTTTCACCTAACACCTCTCCCCCACTTCCAC  
>HPV16\_Alpha\_9627100\_nt1401\_Genome\_Tile\_rc|1  
TTTTAGTACATTTAAAATATTTGTAAGTGGTGTTCGGCATATAGTGTGCTTTCACCTAAC  
>HPV16\_Alpha\_9627100\_nt1421\_Genome\_Tile\_rc|1  
GCTGCCTTTGCATTACTAGTTTTTAGTACATTTAAAATATTTGTAAGTGGTGTTCGGCAT  
>HPV16\_Alpha\_9627100\_nt1441\_Genome\_Tile\_rc|1  
CTTTAAATTTTGCTAACATTGCTGCCTTTGCATTACTAGTTTTTAGTACATTTAAAATAT  
>HPV16\_Alpha\_9627100\_nt1501\_Genome\_Tile\_rc|1  
ACGTTGATTTATTACTTTTAAATGGTCTTACTAATTCTGAAAACTCACCCCGTATAACT  
>HPV16\_Alpha\_9627100\_nt1561\_Genome\_Tile\_rc|1  
TTTTTATACTGTCAGCTATACTGGGTGTAAGTCCAAATGCAGCAATACACCAATCGCAAC  
>HPV16\_Alpha\_9627100\_nt1581\_Genome\_Tile\_rc|1  
ACAATATTGTTGTAATAGTGTTCCTTATACTGTCAGCTATACTGGGTGTAAGTCCAAATGC  
>HPV16\_Alpha\_9627100\_nt1601\_Genome\_Tile\_rc|1  
CTTTGAATGTGTAAATATAACAATATTGTTGTAATAGTGTTCCTTATACTGTCAGCTATA  
>HPV16\_Alpha\_9627100\_nt1741\_Genome\_Tile\_rc|1  
GCAATTTTGAGGCTCTATCATCATACACATTGGAGACACACATAATAGTTTAGACAGCA  
>HPV16\_Alpha\_9627100\_nt2181\_Genome\_Tile\_rc|1  
TGCAGTTAAAAATGACATAAACTCTACACCTTGATACCTTAAAAACATAACAATTTGCTT  
>HPV16\_Alpha\_9627100\_nt2201\_Genome\_Tile\_rc|1  
CCTTGCAAAAATCTTTTAAATGCAGTTAAAAATGACATAAACTCTACACCTTGATACCTT  
>HPV16\_Alpha\_9627100\_nt2241\_Genome\_Tile\_rc|1  
AGCTGCACCATATAGTAATATGCAATTTTTTTTAGGTATGCCTTGCAAAAATCTTTTAA  
>HPV16\_Alpha\_9627100\_nt2321\_Genome\_Tile\_rc|1  
CTTTTAGAATTTACAAAACATATTACAGACCTTGCAGAAATTTTCATTAACTCATACCA  
>HPV16\_Alpha\_9627100\_nt2521\_Genome\_Tile\_rc|1  
CTGTACCAGCATTAATGTTAGATGTAATTAATAATGGAGGGCATTTTAGTTGTACCAATG  
>HPV16\_Alpha\_9627100\_nt2541\_Genome\_Tile\_rc|1  
TAAATAAGGCCACCTAGAATCTGTACCAGCATTAATGTTAGATGTAATTAATAATGGAGG  
>HPV16\_Alpha\_9627100\_nt2821\_Genome\_Tile\_rc|1  
AATAGCACATTCTAGGCGCATGTGTTTCCAATAGTCTATATGGTCACGTAGGTCTGTACT

>HPV16\_Alpha\_9627100\_nt2841\_Genome\_Tile\_rc|1  
ATTTCTCTGGCCTTGTAATAAATAGCACATTCTAGGCGCATGTGTTTCCAATAGTCTATA  
>HPV16\_Alpha\_9627100\_nt2941\_Genome\_Tile\_rc|1  
TATTGTTTCTAACGTTAGTTGCAGTTCAATTGCTTGTAATGCTTTATTCTTTGATACAGC  
>HPV16\_Alpha\_9627100\_nt2961\_Genome\_Tile\_rc|1  
TTACTATATTGTGAGTTATATATTGTTTCTAACGTTAGTTGCAGTTCAATTGCTTGTAAT  
>HPV16\_Alpha\_9627100\_nt2981\_Genome\_Tile\_rc|1  
CTTGTAATGTCCACTTTTTCATTACTATATTGTGAGTTATATATTGTTTCTAACGTTAGTT  
>HPV16\_Alpha\_9627100\_nt3001\_Genome\_Tile\_rc|1  
ATACACTTCAAGGCTAACGCTCTTGTAATGTCCACTTTTTCATTACTATATTGTGAGTTATA  
>HPV16\_Alpha\_9627100\_nt3021\_Genome\_Tile\_rc|1  
CATCCTGTTGGTGCAGTTAAATACACTTCAAGGCTAACGCTTGTAATGTCCACTTTTCA  
>HPV16\_Alpha\_9627100\_nt3081\_Genome\_Tile\_rc|1  
ATTGTATTGCATATGTCTCCATCAAACCTGCACTTCCACTGTATATCCATGTTTTTTTATA  
>HPV16\_Alpha\_9627100\_nt3181\_Genome\_Tile\_rc|1  
TTCATGAACATAATATAAACCATAATAGTCAACTTGACCCTCTACCACAGTTACTGATGC  
>HPV16\_Alpha\_9627100\_nt3201\_Genome\_Tile\_rc|1  
ACAAAATATGTTTCGTATTCCTTCATGAACATAATATAAACCATAATAGTCAACTTGACCC  
>HPV16\_Alpha\_9627100\_nt3341\_Genome\_Tile\_rc|1  
CCAAGTGCTGCCTAATAATTTTCAGGAGAGGATACTTCGTTGCTGCTAAACACAGATGTAG  
>HPV16\_Alpha\_9627100\_nt3381\_Genome\_Tile\_rc|1  
AAGGCGACGGCTTTGGTATGGGTCGCGGCGGGGTGGTTGGCCAAGTGCTGCCTAATAATT  
>HPV16\_Alpha\_9627100\_nt3421\_Genome\_Tile\_rc|1  
TCTTGGTTCGCTGGATAGTCGTCTGTGTTTCTTCGGTGCCCAAGGCGACGGCTTTGGTATG  
>HPV16\_Alpha\_9627100\_nt3541\_Genome\_Tile\_rc|1  
ATTACAGTTAATCCGTCCTTTGTGTGAGCTGTAAATGCAGTGAGGATTGGAGCACTGTC  
>HPV16\_Alpha\_9627100\_nt3561\_Genome\_Tile\_rc|1  
ACTATGGGTGTAGTGTTACTATTACAGTTAATCCGTCCTTTGTGTGAGCTGTAAATGCA  
>HPV16\_Alpha\_9627100\_nt3721\_Genome\_Tile\_rc|1  
TTGCCATTCACTATCATATGTAAGTGTAACAATTGCACTTTTATGTTTACATTATGTCC  
>HPV16\_Alpha\_9627100\_nt3741\_Genome\_Tile\_rc|1  
TGAGACAAAAATTGGTCACGTTGCCATTCACTATCATATGTAAGTGTAACAATTGCACTT  
>HPV16\_Alpha\_9627100\_nt3761\_Genome\_Tile\_rc|1  
TAGTTTTTGGTATTTTAACTTGAGACAAAAATTGGTCACGTTGCCATTCACTATCATATG  
>HPV16\_Alpha\_9627100\_nt3781\_Genome\_Tile\_rc|1  
AAATCCAGTAGACACTGTAATAGTTTTTGGTATTTTAACTTGAGACAAAAATTGGTCACG  
>HPV16\_Alpha\_9627100\_nt3801\_Genome\_Tile\_rc|1  
AAGATTTGTTCATATAGACATAAATCCAGTAGACACTGTAATAGTTTTTGGTATTTTAACT  
>HPV16\_Alpha\_9627100\_nt3821\_Genome\_Tile\_rc|1  
AATGTTGTGGATGCAGTATCAAGATTTGTTCATATAGACATAAATCCAGTAGACACTGTAA  
>HPV16\_Alpha\_9627100\_nt3841\_Genome\_Tile\_rc|1  
AAAGCAAAAAGCACGCCAGTAATGTTGTGGATGCAGTATCAAGATTTGTTCATATAGACAT  
>HPV16\_Alpha\_9627100\_nt3881\_Genome\_Tile\_rc|1  
CGGACGTATTAATAGGCAGACACACAAAAGCACACAAAGCAAAAGCACGCCAGT  
>HPV16\_Alpha\_9627100\_nt3901\_Genome\_Tile\_rc|1  
GTAGACACAGACAAAAGCAGCGGACGTATTAATAGGCAGACACACAAAAGCACACAAAGC  
>HPV16\_Alpha\_9627100\_nt3961\_Genome\_Tile\_rc|1  
CTAAACGCAGAGGCTGCTGTTATCCACAATAGTAATACCAATATTATTAATGATGTGTAT  
>HPV16\_Alpha\_9627100\_nt3981\_Genome\_Tile\_rc|1  
TAATATATACAATAAAACACCTAAACGCAGAGGCTGCTGTTATCCACAATAGTAATACCA  
>HPV16\_Alpha\_9627100\_nt4101\_Genome\_Tile\_rc|1  
AAAAATAGTAAGTTATGGTATACAACAATTATATGTAACAATTACATTATGTACATATAC  
>HPV16\_Alpha\_9627100\_nt4121\_Genome\_Tile\_rc|1  
ATATATGAAAAATAAAAAAGAAAAAATAGTAAGTTATGGTATACAACAATTATATGTAACA  
>HPV16\_Alpha\_9627100\_nt4141\_Genome\_Tile\_rc|1

AACAAACAAAAAAAAAATTATATATGAAAATAAAAAAGAAAAATAGTAAGTTATGGTA  
>HPV16\_Alpha\_9627100\_nt4161\_Genome\_Tile\_rc|1  
AGTTTATTAACAAACAAACAAACAAAAAAAAAATTATATATGAAAATAAAAAAGA  
>HPV16\_Alpha\_9627100\_nt4181\_Genome\_Tile\_rc|1  
TCGCATTGTTAAGTAATAACAGTTTATTAACAAACAAACAAACAAAAAAAAAATT  
>HPV16\_Alpha\_9627100\_nt4201\_Genome\_Tile\_rc|1  
CGTTTTGCAGAACGTTTGTGTCGCATTGTTAAGTAATAACAGTTTATTAACAAACA  
>HPV16\_Alpha\_9627100\_nt4341\_Genome\_Tile\_rc|1  
CAAAAAATACACCCATACTTCCATATTGTAATATTTGTTTCAGCAATAGTTTGCCTTCAA  
>HPV16\_Alpha\_9627100\_nt4461\_Genome\_Tile\_rc|1  
CTACTGTTAAAGGGGTCTTACAGGAGCAAGTGTATCTGTAGCTGTGGGAGGCCTTGTTT  
>HPV16\_Alpha\_9627100\_nt4481\_Genome\_Tile\_rc|1  
ATCAGAAGGGCCCACAGGATCTACTGTTAAAGGGGTCTTACAGGAGCAAGTGTATCTGT  
>HPV16\_Alpha\_9627100\_nt4561\_Genome\_Tile\_rc|1  
TCTGGGGGAATGGAAGGTACAGATGTTGGTGCACCAGCATCAATAAACTAGTTTCTTCC  
>HPV16\_Alpha\_9627100\_nt4581\_Genome\_Tile\_rc|1  
TAATACTAAATCCTGATACATCTGGGGGAATGGAAGGTACAGATGTTGGTGCACCAGCAT  
>HPV16\_Alpha\_9627100\_nt4601\_Genome\_Tile\_rc|1  
TGTGGTATCAGTTGAAGTAGTAATACTAAATCCTGATACATCTGGGGGAATGGAAGGTAC  
>HPV16\_Alpha\_9627100\_nt4621\_Genome\_Tile\_rc|1  
TTAATATCTAATATAGCAGGTGTGGTATCAGTTGAAGTAGTAATACTAAATCCTGATACA  
>HPV16\_Alpha\_9627100\_nt4641\_Genome\_Tile\_rc|1  
TAACAGTAGTAACAGTATTATTAATATCTAATATAGCAGGTGTGGTATCAGTTGAAGTAG  
>HPV16\_Alpha\_9627100\_nt4661\_Genome\_Tile\_rc|1  
AGTGGGATTATTATGTGTAGTAACAGTAGTAACAGTATTATTAATATCTAATATAGCAGG  
>HPV16\_Alpha\_9627100\_nt4841\_Genome\_Tile\_rc|1  
CACTGGGCGAGACCCTGGTATGGGTGTGCTACTAGTTACTGTGTTAGGGTTTGTGCTAAC  
>HPV16\_Alpha\_9627100\_nt5001\_Genome\_Tile\_rc|1  
TAATACTATTATCATTACTAGAAAAATATAATGTATTATCCACATCTATACCTTCATATG  
>HPV16\_Alpha\_9627100\_nt5021\_Genome\_Tile\_rc|1  
GTCAGGATCTGGAGCTATATTAATACTATTATCATTACTAGAAAAATATAATGTATTATC  
>HPV16\_Alpha\_9627100\_nt5201\_Genome\_Tile\_rc|1  
TTGTAATTCTATTTCTTCTGCAGGATCAATAGTACTTAAATCATAATAATAATGTACCTT  
>HPV16\_Alpha\_9627100\_nt5221\_Genome\_Tile\_rc|1  
TATGTAGAAGGTGTTATAGTTTGTAAATCTATTTCTTCTGCAGGATCAATAGTACTTAAA  
>HPV16\_Alpha\_9627100\_nt5241\_Genome\_Tile\_rc|1  
CTGCATGTGAAGTGGTAGTATATGTAGAAGGTGTTATAGTTTGTAAATCTATTTCTTCTG  
>HPV16\_Alpha\_9627100\_nt5261\_Genome\_Tile\_rc|1  
ATTAATAGAAGTAGGTGAGGCTGCATGTGAAGTGGTAGTATATGTAGAAGGTGTTATAGT  
>HPV16\_Alpha\_9627100\_nt5281\_Genome\_Tile\_rc|1  
TAAATATCATATAATCCATTATTAATAGAAGTAGGTGAGGCTGCATGTGAAGTGGTAGTA  
>HPV16\_Alpha\_9627100\_nt5301\_Genome\_Tile\_rc|1  
CTGTAATAAAGTCATCTGCATAAATATCATATAATCCATTATTAATAGAAGTAGGTGAGG  
>HPV16\_Alpha\_9627100\_nt5321\_Genome\_Tile\_rc|1  
TACCGGGGTGTAGAAGTATCTGTAATAAAGTCATCTGCATAAATATCATATAATCCATT  
>HPV16\_Alpha\_9627100\_nt5341\_Genome\_Tile\_rc|1  
GATGTAGAGGGTACAGATGGTACCGGGGTGTAGAAGTATCTGTAATAAAGTCATCTGCA  
>HPV16\_Alpha\_9627100\_nt5361\_Genome\_Tile\_rc|1  
CAGGAATATAACCTGATAAAGATGTAGAGGGTACAGATGGTACCGGGGTGTAGAAGTAT  
>HPV16\_Alpha\_9627100\_nt5401\_Genome\_Tile\_rc|1  
GGAATATTGTATGCACCACCAAAGGAATTGTTGTATTTGCAGGAATATAACCTGATAAA  
>HPV16\_Alpha\_9627100\_nt5421\_Genome\_Tile\_rc|1  
TATCAGGACCTGATACTAAAGGAATATTGTATGCACCACCAAAGGAATTGTTGTATTTG  
>HPV16\_Alpha\_9627100\_nt5461\_Genome\_Tile\_rc|1  
GGAATTAATGAAGGAGCTTGGTCAGTTATATTAATGGGTATATCAGGACCTGATACTAAA



>HPV16\_Alpha\_9627100\_nt5481\_Genome\_Tile\_rc|1  
GTGGAGACCCCTGGAACCTATAGGAATTAATGAAGGAGCTTGGTCAGTTATATTAATGGGTA  
>HPV16\_Alpha\_9627100\_nt5501\_Genome\_Tile\_rc|1  
ATCAGCAATAATTGTATATTGTGGAGACCCCTGGAACCTATAGGAATTAATGAAGGAGCTTG  
>HPV16\_Alpha\_9627100\_nt6021\_Genome\_Tile\_rc|1  
AGATATACATTCTCTATTATCCACACCTGCATTTGCTGCATAAGCACTAGCATTTTCTGT  
>HPV16\_Alpha\_9627100\_nt6121\_Genome\_Tile\_rc|1  
GATTTACTGCAACATTGGTACATGGGGATCCTTTGCCCCAGTGTTCCCTTATAGGTGGTT  
>HPV16\_Alpha\_9627100\_nt6161\_Genome\_Tile\_rc|1  
ATAACTGTGTTTATTAACCTAATGGTGGACAATCACCTGGATTTACTGCAACATTGGTA  
>HPV16\_Alpha\_9627100\_nt6421\_Genome\_Tile\_rc|1  
ACCCAGAGCCTTTAATGTATAAATCGTCTGGTACATTTTCACCAACAGTACCAGCCCTAT  
>HPV16\_Alpha\_9627100\_nt6461\_Genome\_Tile\_rc|1  
GGTGTAGGAAAATAATTTGAACTGGCTAAATTTGCAGTAGACCCAGAGCCTTTAATGTAT  
>HPV16\_Alpha\_9627100\_nt6641\_Genome\_Tile\_rc|1  
TATGTAGTTTCTGAAGTAGATATGGCAGCACATAATGACATATTTGTACTGCGTGTAGTA  
>HPV16\_Alpha\_9627100\_nt6861\_Genome\_Tile\_rc|1  
TTGACAAGCAATTGCCTGGGTTACAAACCTATAAGTATCTTCTAGTGTGCCTCCTGGGGG  
>HPV16\_Alpha\_9627100\_nt6881\_Genome\_Tile\_rc|1  
GGTGTGGAGGTGTATGTTTTTTGACAAGCAATTGCCTGGGTTACAAACCTATAAGTATCT  
>HPV16\_Alpha\_9627100\_nt6921\_Genome\_Tile\_rc|1  
TTCCCAAAAAGTGATTTTTTTAAGGGGATCATCTTCTTTAGGTGCTGGAGGTGTATGTTT  
>HPV16\_Alpha\_9627100\_nt7021\_Genome\_Tile\_rc|1  
ATGTAAATTTTGGTTTGGCCTTCAATCCTGCTTGTAGTAAAAATTTGCGTCCTAAAGGAA  
>HPV16\_Alpha\_9627100\_nt7041\_Genome\_Tile\_rc|1  
TGTAGCTTTTTCGTTTTCTTAATGTAAATTTTGGTTTGGCCTTCAATCCTGCTTGTAGTAA  
>HPV16\_Alpha\_9627100\_nt7061\_Genome\_Tile\_rc|1  
GAGGTAGATGAGGTGGTGGGTGTAGCTTTTCGTTTTCTTAATGTAAATTTTGGTTTGGCC  
>HPV16\_Alpha\_9627100\_nt7101\_Genome\_Tile\_rc|1  
CAATACTTACAGCTTACGTTTTTTTGCCTTTAGCAGTTGTAGAGGTAGATGAGGTGGTGGG  
>HPV16\_Alpha\_9627100\_nt7121\_Genome\_Tile\_rc|1  
ACACTAATTCAACATACATACAATACTTACAGCTTACGTTTTTTGCGTTTAGCAGTTGTA  
>HPV16\_Alpha\_9627100\_nt7141\_Genome\_Tile\_rc|1  
AAACATATACACAACAACAACACTAATTCAACATACATACAATACTTACAGCTTACGTT  
>HPV16\_Alpha\_9627100\_nt7161\_Genome\_Tile\_rc|1  
AAGCACATACAAGCACATACAACATATACACAACAACAACACTAATTCAACATACATA  
>HPV16\_Alpha\_9627100\_nt7201\_Genome\_Tile\_rc|1  
TATACCATACATACAACACACATACAACCTTAATATTTACAAGCACATACAAGCACATAC  
>HPV16\_Alpha\_9627100\_nt7241\_Genome\_Tile\_rc|1  
AGTTACACAAGCATTTAAAAACACATACACACGTGTTTATTATACCATACATACAACAC  
>HPV16\_Alpha\_9627100\_nt7261\_Genome\_Tile\_rc|1  
TTTATGTTGCATGACACAATAGTTACACAAGCATTTAAAAACACATACACACGTGTTTAT  
>HPV16\_Alpha\_9627100\_nt7281\_Genome\_Tile\_rc|1  
GTGTTGAAACAATAAGTTTATTTATGTTGCATGACACAATAGTTACACAAGCATTTAAAA  
>HPV16\_Alpha\_9627100\_nt7301\_Genome\_Tile\_rc|1  
AACCACAACACAATTAGTAGGTGTTGAAACAATAAGTTTATTTATGTTGCATGACACAAT  
>HPV16\_Alpha\_9627100\_nt7321\_Genome\_Tile\_rc|1  
ATAGTTTATATACAATGAATAACCACAACACAATTAGTAGGTGTTGAAACAATAAGTTTA  
>HPV16\_Alpha\_9627100\_nt7341\_Genome\_Tile\_rc|1  
AAAAACAGGATGTAGCAAATATAGTTTATATACAATGAATAACCACAACACAATTAGTAG  
>HPV16\_Alpha\_9627100\_nt7361\_Genome\_Tile\_rc|1  
AAATATAGTATATATAAAAACAAAACAGGATGTAGCAAATATAGTTTATATACAATGAAT  
>HPV16\_Alpha\_9627100\_nt7461\_Genome\_Tile\_rc|1  
ACCATAGTTGCTGACATAGAAGTATTTAAAAAACACATTTTGTGCCAAAAAGCATGCAA  
>HPV16\_Alpha\_9627100\_nt7501\_Genome\_Tile\_rc|1

GATTTGGCACGCATGGCAAGCAGGAAACGTACAAGTTTAAACCATAGTTGCTGACATAGA  
>HPV16\_Alpha\_9627100\_nt7541\_Genome\_Tile\_rc|1  
AATGGAATGGTTGGCAAGCAGTGCAGGTCAGGAAAACAGGGATTTGGCACGCATGGCAAG  
>HPV16\_Alpha\_9627100\_nt7581\_Genome\_Tile\_rc|1  
ATAGTGATTTCAGTAGTTGCACATAGTGCAGTGTAACCAATGGAATGGTTGGCAAGCA  
>HPV16\_Alpha\_9627100\_nt7601\_Genome\_Tile\_rc|1  
TTTTATATGACACAATGTACATAGTGATTTCAGTAGTTGCACATAGTGCAGTGTAACCAAC  
>HPV16\_Alpha\_9627100\_nt7621\_Genome\_Tile\_rc|1  
CGTTGGCGCATAGTGATTTATTTTATATGACACAATGTACATAGTGATTTCAGTAGTTGCA  
>HPV16\_Alpha\_9627100\_nt7641\_Genome\_Tile\_rc|1  
CCTAACAGCGGTATGTAAGGCGTTGGCGCATAGTGATTTATTTTATATGACACAATGTAC  
>HPV16\_Alpha\_9627100\_nt7701\_Genome\_Tile\_rc|1  
AAGTTTAAACCTTATGCCAATATGCAATTAGGTTAGTTAAACAAGCCAAAAATATGTG  
>HPV16\_Alpha\_9627100\_nt7741\_Genome\_Tile\_rc|1  
AGTTCATGTATGAACTAGGGTGACATTTAGTTGGCCTTAGAAGTTTAAACCTTATGCCAA  
>HPV16\_Alpha\_9627100\_nt7761\_Genome\_Tile\_rc|1  
TGTATGACTAACCTTTACACAGTTCATGTATGAACTAGGGTGACATTTAGTTGGCCTTAG  
>HPV16\_Alpha\_9627100\_nt7781\_Genome\_Tile\_rc|1  
GCAGTTTACAAATGAACAATGTATGACTAACCTTTACACAGTTCATGTATGAACTAGGG  
>HPV16\_Alpha\_9627100\_nt7801\_Genome\_Tile\_rc|1  
CGGTTTGCACACCCATGTGCAGTTTACAAATGAACAATGTATGACTAACCTTTACAC  
>HPV16\_Alpha\_9627100\_nt7821\_Genome\_Tile\_rc|1  
GTAAATGTGTAACCCAAAATCGGTTTGCACACCCATGTGCAGTTTACAAATGAACAA  
>HPV16\_Alpha\_9627100\_nt7841\_Genome\_Tile\_rc|1  
TATTATTATATAAGTTGCTTGTAATGTGTAACCCAAAATCGGTTTGCACACCCATGT  
>HPV71\_Alpha\_12084981\_nt0001\_Genome\_Tile\_rc|1  
TACACCTATATTTCTTATACAAACATTATAATTTATAATAATGAGTAAGAAGTAGAACAA  
>HPV71\_Alpha\_12084981\_nt0021\_Genome\_Tile\_rc|1  
TCGGTTACACCGTTTTTCGGTTACACCTATATTTCTTATACAAACATTATAATTTATAATA  
>HPV71\_Alpha\_12084981\_nt0081\_Genome\_Tile\_rc|1  
GTCCCCGCTGGACATAGCTAAATCTGCTGAACCAAGCATTGCTTTATATATGCACCCATT  
>HPV71\_Alpha\_12084981\_nt0121\_Genome\_Tile\_rc|1  
CGTACTGGTTACACAGTCTGAAGAGGTTGGTGGGGTATGCGTCCCCGCTGGACATAGCTA  
>HPV71\_Alpha\_12084981\_nt0141\_Genome\_Tile\_rc|1  
CAGGTCCCTGCAGGTCCACGTCGTACTGGTTACACAGTCTGAAGAGGTTGGTGGGGTATGC  
>HPV71\_Alpha\_12084981\_nt0201\_Genome\_Tile\_rc|1  
ATATGCAAGGCCACGACTTCACGTCTGTAAATTGTTCTGCAGAATATGCAGGTTAGGTT  
>HPV71\_Alpha\_12084981\_nt0301\_Genome\_Tile\_rc|1  
ATTGCCAATATCTAAGTTGCCTTAGTTTTCCAGCTATTTCCAAACAGCAGGCACATGCAG  
>HPV71\_Alpha\_12084981\_nt0321\_Genome\_Tile\_rc|1  
TGTGTTTGCAAAGCCTGAAAATTGCCAATATCTAAGTTGCCTTAGTTTTCCAGCTATTTT  
>HPV71\_Alpha\_12084981\_nt0341\_Genome\_Tile\_rc|1  
GTTCCGGTGTCTAATTCCTACTGTGTTTGCAAAGCCTGAAAATTGCCAATATCTAAGTTGC  
>HPV71\_Alpha\_12084981\_nt0361\_Genome\_Tile\_rc|1  
TTAGTTGCTCTGTAAGTGGCGTTCCGGTGTCTAATTCCTACTGTGTTTGCAAAGCCTGAAA  
>HPV71\_Alpha\_12084981\_nt0381\_Genome\_Tile\_rc|1  
GTGACACACGTAGCACCGTATTAGTTGCTCTGTAAGTGGCGTTCCGGTGTCTAATTCAC  
>HPV71\_Alpha\_12084981\_nt0401\_Genome\_Tile\_rc|1  
TCCACACTACACAATGGCTTGTGACACACGTAGCACCGTATTAGTTGCTCTGTAAGTGGC  
>HPV71\_Alpha\_12084981\_nt0421\_Genome\_Tile\_rc|1  
CTGTAATTATTCTTTCTTTTCCACACTACACAATGGCTTGTGACACACGTAGCACCGTA  
>HPV71\_Alpha\_12084981\_nt0441\_Genome\_Tile\_rc|1  
TTTATGAAATCGCCTGCCTTCTGTAATTATTCTTTCTTTTCCACACTACACAATGGCTT  
>HPV71\_Alpha\_12084981\_nt0541\_Genome\_Tile\_rc|1  
AACCTCTGGCTGTAGCTGCAGGACAATGTCTTTAAGGTACATTGTTGGCCTCGCATGGTT

>HPV71\_Alpha\_12084981\_nt0861\_Genome\_Tile\_rc|1  
AATAGCTTCTACAAAAAACCACTCCCGCGCCTGTTCCCGCTTCGCCCCATCATCATC  
>HPV71\_Alpha\_12084981\_nt0901\_Genome\_Tile\_rc|1  
CCTCATCACTGGATGGCTGTGGGCCGGTACATCTGTCCACAATAGCTTCTACAAAAAAC  
>HPV71\_Alpha\_12084981\_nt1141\_Genome\_Tile\_rc|1  
CTTTTTGGGATTCCCTGCCTATGGATATAGCATCTAGCCGCGGGCTTAACTCTTTGTCTA  
>HPV71\_Alpha\_12084981\_nt1261\_Genome\_Tile\_rc|1  
CCTGTTCTGTGTGCAGCCCCCTGGCGTCCCGTCCCTTGGTACCTGGTTTCCTGCCGCTT  
>HPV71\_Alpha\_12084981\_nt1601\_Genome\_Tile\_rc|1  
CACTTATATCGCAACAGCATTAATATAACCACTCCCCAGGAACATGTTTGTGTGTATG  
>HPV71\_Alpha\_12084981\_nt2081\_Genome\_Tile\_rc|1  
ACTATTGTTTCGCCAATCCCCTTCTTCTGTTATTTTAGCACTTCTAAATGATATCCATTGT  
>HPV71\_Alpha\_12084981\_nt2101\_Genome\_Tile\_rc|1  
CCTGGTGTCTTAAATATTTTACTATTGTTCGCCAATCCCCTTCTTCTGTTATTTTAGCAC  
>HPV71\_Alpha\_12084981\_nt2261\_Genome\_Tile\_rc|1  
TTGGCATAGGAAATGACAACCCCAACCAAAACCGTAATAGGCTCATGCAAAAATAGGAT  
>HPV71\_Alpha\_12084981\_nt2361\_Genome\_Tile\_rc|1  
TAGATATACATCTATATAGCTCCAGCAATTAGGGGTACATCATCTATTAGTCCTAATTT  
>HPV71\_Alpha\_12084981\_nt2441\_Genome\_Tile\_rc|1  
AACAATGGGGGACACTTTAACTGCAGTAATGGCCTGTGTTTTCTATCTATACATATTTGA  
>HPV71\_Alpha\_12084981\_nt2901\_Genome\_Tile\_rc|1  
GGACTGTTAAGTAATGTCTTTAATGCCAACTGAATTTCAATTGCTTTACAAGCTTTGGCT  
>HPV71\_Alpha\_12084981\_nt3021\_Genome\_Tile\_rc|1  
TCCTCTTTTGCAATCGTATCGCACTTCTACAGTGTAGCCTTTTTTTTTTCCAGCATTGCTTA  
>HPV71\_Alpha\_12084981\_nt3041\_Genome\_Tile\_rc|1  
ATGTGTAACACATTGTCTTTTCTCTTTGCAATCGTATCGCACTTCTACAGTGTAGCCTT  
>HPV71\_Alpha\_12084981\_nt3061\_Genome\_Tile\_rc|1  
CACATATATTTCCCTCCAACATGTGTAACACATTGTCTTTTCTCTTTGCAATCGTATCG  
>HPV71\_Alpha\_12084981\_nt3081\_Genome\_Tile\_rc|1  
GTCTCATTTGTACTGTTTTGCACATATATTTCCCTCCAACATGTGTAACACATTGTCTTT  
>HPV71\_Alpha\_12084981\_nt3121\_Genome\_Tile\_rc|1  
TATGCCCGCATGGTCCACCAGGCCACACACTTTTTCCCATGTCTCATTTGTACTGTTTTG  
>HPV71\_Alpha\_12084981\_nt3141\_Genome\_Tile\_rc|1  
ATCCCATCGTGTAATAGTATATGCCCGCATGGTCCACCAGGCCACACACTTTTTCCCAT  
>HPV71\_Alpha\_12084981\_nt3161\_Genome\_Tile\_rc|1  
ATAATACACAGTCTACACGTATCCCATCGTGTAATAGTATATGCCCGCATGGTCCACCA  
>HPV71\_Alpha\_12084981\_nt3181\_Genome\_Tile\_rc|1  
TATTACTGCTTCCTTGGAGAATAATACACAGTCTACACGTATCCCATCGTGTAATAGTA  
>HPV71\_Alpha\_12084981\_nt3201\_Genome\_Tile\_rc|1  
CAGATGCCTGTGTCCCATATATTACTGCTTCCTTGGAGAATAATACACAGTCTACACGT  
>HPV71\_Alpha\_12084981\_nt3341\_Genome\_Tile\_rc|1  
TGGAGGCCTGTTGGGGGTGCGAGTCGGGTCCGTGGTCAGTAGGTTAATAGTGGGTACTT  
>HPV71\_Alpha\_12084981\_nt3701\_Genome\_Tile\_rc|1  
ACAATGTTACAAATGTTGTTTTACATGTATTGTCCTCTGTGCCAGTGGCCCAATGCCACG  
>HPV71\_Alpha\_12084981\_nt3761\_Genome\_Tile\_rc|1  
TGCCCTTAGGAATATGTACAGTGGCTAGAAATTGTGCCCGCTGTTCCACACTATCATGCC  
>HPV71\_Alpha\_12084981\_nt3801\_Genome\_Tile\_rc|1  
GATTATGCAACAATGACATATATCCTGGTAAGGCCTCTATGCCCTTAGGAATATGTACA  
>HPV71\_Alpha\_12084981\_nt3821\_Genome\_Tile\_rc|1  
ATATATACAATATTTACAAAGATTATGCAACAATGACATATATCCTGGTAAGGCCTCTA  
>HPV71\_Alpha\_12084981\_nt3901\_Genome\_Tile\_rc|1  
CAGACACCCAGCATAGAAAGGGCTCCAGCACTACAGGTAGGTGTGTACCCTTAACGTTCC  
>HPV71\_Alpha\_12084981\_nt3941\_Genome\_Tile\_rc|1  
AGCCAAAAGCTAATTAGTAGTAGTAGTGCATAGGTCCATGCAGACACCCAGCATAGAAAG  
>HPV71\_Alpha\_12084981\_nt3961\_Genome\_Tile\_rc|1

TAAGAGAAGATAAAAATAGACAGCCAAAAGCTAATTAGTAGTAGTAGTGCATAGGTCCATG  
>HPV71\_Alpha\_12084981\_nt3981\_Genome\_Tile\_rc|1  
AAAAAAAATTAAAAAGGCAGTAAGAGAAGATAAAAATAGACAGCCAAAAGCTAATTAGTAG  
>HPV71\_Alpha\_12084981\_nt4001\_Genome\_Tile\_rc|1  
AACCCAAGAAACACAGTAACAAAAAAATTTAAAAAGGCAGTAAGAGAAGATAAAAATAGAC  
>HPV71\_Alpha\_12084981\_nt4021\_Genome\_Tile\_rc|1  
CCTGTATATATAGTGCTAGAAACCCAAGAAACACAGTAACAAAAAAATTTAAAAAGGCAG  
>HPV71\_Alpha\_12084981\_nt4061\_Genome\_Tile\_rc|1  
GTGGTAGTCACAAAGTCACAGTTAGGTAAGGGACGCTGCTGCCTGTATATATAGTGCTAGA  
>HPV71\_Alpha\_12084981\_nt4121\_Genome\_Tile\_rc|1  
TGCAATCTATAACACAAATGGATAGGTTATGTACACGTAGTAGCAGTATTGGCTGGTTGT  
>HPV71\_Alpha\_12084981\_nt4141\_Genome\_Tile\_rc|1  
ACCACAACAGGATACATATATGCAATCTATAACACAAATGGATAGGTTATGTACACGTAG  
>HPV71\_Alpha\_12084981\_nt4181\_Genome\_Tile\_rc|1  
CCACACCACAATATCATAATGTCCGCCTTGGGAATCCTTTACCACAACAGGATACATATA  
>HPV71\_Alpha\_12084981\_nt4221\_Genome\_Tile\_rc|1  
ACACTAAAAACACAAACAATACATCTACATCATCAGGGCCCCACACCACAATATCATAAT  
>HPV71\_Alpha\_12084981\_nt4241\_Genome\_Tile\_rc|1  
AAGCAACATAAGACACACCAACACTAAAAACACAAACAATACATCTACATCATCAGGGCC  
>HPV71\_Alpha\_12084981\_nt4261\_Genome\_Tile\_rc|1  
ATCAACCGTAACAAAAACAGAAGCAACATAAGACACACCAACACTAAAAACACAAACAAT  
>HPV71\_Alpha\_12084981\_nt4281\_Genome\_Tile\_rc|1  
AAAGGGGGGGTACCTACTGCATCAACCGTAACAAAAACAGAAGCAACATAAGACACACCA  
>HPV71\_Alpha\_12084981\_nt4301\_Genome\_Tile\_rc|1  
TGTATAAACAGGGCAATACAAAAGGGGGGTACCTACTGCATCAACCGTAACAAAAACAG  
>HPV71\_Alpha\_12084981\_nt4381\_Genome\_Tile\_rc|1  
TAAATGTGTTTATTTACACACACAGGCACACACAAAAAAACAAAAACAAAAACCAAATAA  
>HPV71\_Alpha\_12084981\_nt4781\_Genome\_Tile\_rc|1  
GATGCTGTAGTGACCTCAAACCCACCTGTGCCAGTAAAGTTAGGATATGGTGCTCCTGCT  
>HPV71\_Alpha\_12084981\_nt4861\_Genome\_Tile\_rc|1  
AGGATGGGTAGTAAACTACTGCTACTAACCTGCACAGTGTTACCTGGAGTAATGTCTA  
>HPV71\_Alpha\_12084981\_nt4921\_Genome\_Tile\_rc|1  
CCAAAATATGTCCCGAAACCTCACCTGTTTGAGGGGGCTCCACTAAGGCAGGTTTCAGTAA  
>HPV71\_Alpha\_12084981\_nt5141\_Genome\_Tile\_rc|1  
ACAGGGTTGTCATATGTAACCATAGATGCAGGGTGGCGAAGAAATGTGGATTCATCCACC  
>HPV71\_Alpha\_12084981\_nt5281\_Genome\_Tile\_rc|1  
GTCCTAAACGACTGAAACGTACCGTACCTTTACGGGCAGTAAGGGCCGGCCTGTGCAAGG  
>HPV71\_Alpha\_12084981\_nt5401\_Genome\_Tile\_rc|1  
AGGCCCCGCCCTAGTGGCTGCAGTTCTAAGTGTTTCGGTGGGTGTATAGGGCTAATGTCAT  
>HPV71\_Alpha\_12084981\_nt5421\_Genome\_Tile\_rc|1  
GTCAATAGGTTCTTGTGTGAAGGCCCCCCTAGTGGCTGCAGTTCTAAGTGTTTCGGTGGG  
>HPV71\_Alpha\_12084981\_nt5441\_Genome\_Tile\_rc|1  
AGATATATGTCATATAATGTGTCAATAGGTTCTTGTGTGAAGGCCCCGCCCTAGTGGCTGC  
>HPV71\_Alpha\_12084981\_nt5481\_Genome\_Tile\_rc|1  
AAGTAGGTTGAATGACAGTATCATTGGAATAATCTGTGTCAGATATATGTCATATAATGT  
>HPV71\_Alpha\_12084981\_nt5501\_Genome\_Tile\_rc|1  
TGTAGGCCTGCTGGACACAGAAGTAGGTTGAATGACAGTATCATTGGAATAATCTGTGTC  
>HPV71\_Alpha\_12084981\_nt5521\_Genome\_Tile\_rc|1  
CAGAGGGGTATAGTAGGTGTAGGCCTGCTGGACACAGAAGTAGGTTGAATGACAGTA  
>HPV71\_Alpha\_12084981\_nt5561\_Genome\_Tile\_rc|1  
TTTTGTGTGCGAGAGGCAGACACGGCTGATGTGGCAGTTACAGAGGGGTATAGTAGTAGG  
>HPV71\_Alpha\_12084981\_nt5601\_Genome\_Tile\_rc|1  
CACTGGAACATCTGCTCCTGCAGACAAAAGTGCTGTAACATTTTGTGTGCGAGAGGCAGA  
>HPV71\_Alpha\_12084981\_nt5621\_Genome\_Tile\_rc|1  
TCAATGTCAGGGCCATCAAACACTGGAACATCTGCTCCTGCAGACAAAAGGTGCTGTAACA

>HPV71\_Alpha\_12084981\_nt5681\_Genome\_Tile\_rc|1  
CTGGGAGGTGCAATGGACGGCACTACAGGAGTAGGAGTAGTGGCATGGGAGGTGGAAAAA  
>HPV71\_Alpha\_12084981\_nt7421\_Genome\_Tile\_rc|1  
CGCACAGTATATACACACGTACACAACAACATACAATATACACAACAAACACATATACAT  
>HPV71\_Alpha\_12084981\_nt7501\_Genome\_Tile\_rc|1  
ACAGGGGTGCAACCAAATAACACACATACATGACACGCATTTATTAACAACACAAACATG  
>HPV71\_Alpha\_12084981\_nt7561\_Genome\_Tile\_rc|1  
GTCACCTGGTCAGTAAGGCGTCACCGGACAGGGGGGTTATATCTGCTTGCACACTTACTC  
>HPV71\_Alpha\_12084981\_nt7721\_Genome\_Tile\_rc|1  
GTATGCACACCTGTGTTGGAAAGGATATGAAGCAATACAAGGATTACCCATTGTATAGTA  
>HPV71\_Alpha\_12084981\_nt7741\_Genome\_Tile\_rc|1  
GCCAGGCACACCTTATGATGGTATGCACACCTGTGTTGGAAAGGATATGAAGCAATACAA  
>HPV71\_Alpha\_12084981\_nt7801\_Genome\_Tile\_rc|1  
GGTGAGTAACACATGTATTAAAGTTAATTATAACATGCATTTATAGTGTGCCAAATAACT  
>HPV71\_Alpha\_12084981\_nt7821\_Genome\_Tile\_rc|1  
CCAAACAATGGGTATTGCACGGTGAGTAACACATGTATTAAAGTTAATTATAACATGCAT  
>HPV71\_Alpha\_12084981\_nt7841\_Genome\_Tile\_rc|1  
AGTCAGCACAACTATATGCCCCAAACAATGGGTATTGCACGGTGAGTAACACATGTATTA  
>HPV71\_Alpha\_12084981\_nt7861\_Genome\_Tile\_rc|1  
AAACGTACTTAGGCGAACATAGTCAGCACAACTATATGCCCCAAACAATGGGTATTGCAC  
>HPV71\_Alpha\_12084981\_nt7921\_Genome\_Tile\_rc|1  
AAGTACATTATAAAAGTTAGCAGACACATTCTTGGACAGAACTACACTGCTGTTGCCAA  
>HPV71\_Alpha\_12084981\_nt7941\_Genome\_Tile\_rc|1  
TGTGTATAAAACCATGTTGCTAAGTACATTATAAAAGTTAGCAGACACATTCTTGGACAGA  
>HPV61\_Alpha\_9628574\_nt0061\_Genome\_Tile\_rc|1  
TTGGATTGCACGGTCCCATAGATGAGTGTGCTTTGCTGACCCTACGGTTTCTTTATATAT  
>HPV61\_Alpha\_9628574\_nt0421\_Genome\_Tile\_rc|1  
CAGCTATATAGTGGAAGTGGATGTATGCCTGTACCTGATGCTCCTTTTCCTGTATACTTA  
>HPV61\_Alpha\_9628574\_nt1321\_Genome\_Tile\_rc|1  
CGCCTGCTCCTGCGCTTGCCTTTCTGCTTACCTGTGGCCTCGGCCTCTCCGTCCCCCCC  
>HPV61\_Alpha\_9628574\_nt1361\_Genome\_Tile\_rc|1  
CTTTTAAATTACTAACCTTAAACACCTCTAATATGTCTGCCGCTGCTCCTGCGCTTGCG  
>HPV61\_Alpha\_9628574\_nt1381\_Genome\_Tile\_rc|1  
GAATTTGTACAGTAATTTTGCTTTTAAATTACTAACCTTAAACACCTCTAATATGTCTGC  
>HPV61\_Alpha\_9628574\_nt2521\_Genome\_Tile\_rc|1  
CTTATGTAAAACTGAAACACCACTATTCTACTGTGCAGGTATTTAAACGTAGGATCCTC  
>HPV61\_Alpha\_9628574\_nt2561\_Genome\_Tile\_rc|1  
TCAGGGTATATACTGGGTCCCCATTACTGTTTAGTGGACACTTATGTAAAACTGAAACA  
>HPV61\_Alpha\_9628574\_nt3081\_Genome\_Tile\_rc|1  
TTTCTGTGCTTTGTACATAAATATACCCCCAACTAACGTATTCCACTGCTTTGTGGTCCT  
>HPV61\_Alpha\_9628574\_nt3101\_Genome\_Tile\_rc|1  
AACCTTATACCACAGATCAGTTTCTGTGCTTTGTACATAAATATACCCCCAACTAACGTA  
>HPV61\_Alpha\_9628574\_nt3141\_Genome\_Tile\_rc|1  
CCATTTTATAATATAGGCCCTTATATGACACTTTTCCAGGAACCTTATACCACAGATCAG  
>HPV61\_Alpha\_9628574\_nt3161\_Genome\_Tile\_rc|1  
ATAATAGTGTTCCTGTCCCTCCATTTTATAATATAGGCCCTTATATGACACTTTTCCAGG  
>HPV61\_Alpha\_9628574\_nt3181\_Genome\_Tile\_rc|1  
GCCTCCTGTGCAAATGTACATAAATAGTGTTCCTGTCCCTCCATTTTATAATATAGGCC  
>HPV61\_Alpha\_9628574\_nt3761\_Genome\_Tile\_rc|1  
TTGTATACCCTTTGGAATGGTTACACGATTTAAAAATTGTTTTTCGTTGTTCCACATTAAC  
>HPV61\_Alpha\_9628574\_nt3901\_Genome\_Tile\_rc|1  
CGTCCAGGATTGTTTATGGTTTACACAATAATGCAGGTGTGGTATGTAAATAGCTGTAGC  
>HPV61\_Alpha\_9628574\_nt4041\_Genome\_Tile\_rc|1  
TTGCATGTATATGCACAACAATCCTACATATATGGCACAGAAAAACCAAAAAATGCGCT  
>HPV61\_Alpha\_9628574\_nt4141\_Genome\_Tile\_rc|1

ATACATATTGCAAACGAACAACAGACACAAGGAACACTATTTACATATGAGCAGCAGTGT  
>HPV61\_Alpha\_9628574\_nt4161\_Genome\_Tile\_rc|1  
GGGGAACCTAACTACAAGGGGATACATATTGCAAACGAACAACAGACACAAGGAACACTAT  
>HPV61\_Alpha\_9628574\_nt4181\_Genome\_Tile\_rc|1  
CCAGTAATGCAAACCCCTGAGGGGAACCTAACTACAAGGGGATACATATTGCAAACGAACA  
>HPV61\_Alpha\_9628574\_nt4201\_Genome\_Tile\_rc|1  
GCAGTTTTGCTGATCCACAACCAGTAATGCAAACCCCTGAGGGGAACCTAACTACAAGGGG  
>HPV61\_Alpha\_9628574\_nt4221\_Genome\_Tile\_rc|1  
AAAAACAAAAATAACAATCCGCAGTTTTGCTGATCCACAACCAGTAATGCAAACCCCTGA  
>HPV61\_Alpha\_9628574\_nt4241\_Genome\_Tile\_rc|1  
TTGCAATAAGCAGTAATAGCAAAAACAAAAATAACAATCCGCAGTTTTGCTGATCCACAA  
>HPV61\_Alpha\_9628574\_nt4261\_Genome\_Tile\_rc|1  
TAAAGCCTGTACAACAGTATTGCAATAAGCAGTAATAGCAAAAACAAAAATAACAATCC  
>HPV61\_Alpha\_9628574\_nt4281\_Genome\_Tile\_rc|1  
ACAAGGTACACCACCTAATGTAAAAGCCTGTACAACAGTATTGCAATAAGCAGTAATAGC  
>HPV61\_Alpha\_9628574\_nt4321\_Genome\_Tile\_rc|1  
AAAATATAACAAAGTAAAAAACTGTGGGGAGGGGAAAACACACAAGGTACACCACCTAATG  
>HPV61\_Alpha\_9628574\_nt4361\_Genome\_Tile\_rc|1  
CGTTTAAGAGCCATAATGTTTATTAGGCCATAAACATATAAAAAATATAACAAAGTAAAAA  
>HPV61\_Alpha\_9628574\_nt4681\_Genome\_Tile\_rc|1  
CAATGACGCTGGATTCCCTCTACAAGGGTAACATATAGAGGGATCGGCAGCACCCACTGGAT  
>HPV61\_Alpha\_9628574\_nt4761\_Genome\_Tile\_rc|1  
CACAGCCGGGGTGGTAGTAGAAGACGACGTGACATTGAAGCCCCCGGACCCGAAAATGT  
>HPV61\_Alpha\_9628574\_nt4781\_Genome\_Tile\_rc|1  
CCCGATGGAGTAATGTCCAACACAGCCGGGGTGGTAGTAGAAGACGACGTGACATTGAAG  
>HPV61\_Alpha\_9628574\_nt4981\_Genome\_Tile\_rc|1  
CAGGCAGCGGGTACTACTTCCAGGACCCTCAGAGGTAGCAAAGGTGTGCATTGGGATTT  
>HPV61\_Alpha\_9628574\_nt5081\_Genome\_Tile\_rc|1  
AAGGAGGCTGGATCAGACATAAATGTAGGGTTAGCAACCTTAATTTGTTGGTTAGCCTTA  
>HPV61\_Alpha\_9628574\_nt5381\_Genome\_Tile\_rc|1  
TCATATGTTATACTAGGGGACGAGGACGGCACCAAAGGCTGTAACCTCCACAGCATCCGAT  
>HPV61\_Alpha\_9628574\_nt5421\_Genome\_Tile\_rc|1  
TTGTGCAGGAAGATCCAACACCTCAGGGTCAGCATATATATCATATGTTATACTAGGGGA  
>HPV61\_Alpha\_9628574\_nt5441\_Genome\_Tile\_rc|1  
GTAAGTGTGGGTTGTGTATGTTGTGCAGGAAGATCCAACACCTCAGGGTCAGCATATATA  
>HPV61\_Alpha\_9628574\_nt5461\_Genome\_Tile\_rc|1  
AGAGGGAAGGGCCCTGTACTGTAAGTGTGGGTTGTGTATGTTGTGCAGGAAGATCCAACA  
>HPV61\_Alpha\_9628574\_nt5481\_Genome\_Tile\_rc|1  
GGTAGATGCAGATGCAGCAGAGAGGGAAGGGCCCTGTACTGTAAGTGTGGGTTGTGTATG  
>HPV61\_Alpha\_9628574\_nt5501\_Genome\_Tile\_rc|1  
ACAGTGACATTGTGTACCTTGGTAGATGCAGATGCAGCAGAGAGGGAAGGGCCCTGTACT  
>HPV61\_Alpha\_9628574\_nt5561\_Genome\_Tile\_rc|1  
TGTGCAAAATCAACATCAGGGCCAGATGTCACAGGCGTATCAAGCCCTGTGGCCAGTGGA  
>HPV61\_Alpha\_9628574\_nt5881\_Genome\_Tile\_rc|1  
GCCCTGCAGCCCATCAAGCTGCAAACTACAATAGGGATGTCCTACAGTAAGCAGACGGGA  
>HPV61\_Alpha\_9628574\_nt5901\_Genome\_Tile\_rc|1  
TTGGGGATAGTGTCTTTCTTGCCCTGCAGCCCATCAAGCTGCAAACTACAATAGGGATGT  
>HPV61\_Alpha\_9628574\_nt6281\_Genome\_Tile\_rc|1  
TTGTAAATTCCAATGGAGGACAGTCAGTGGGCCGGGGCGGGGTTAGCACAAGCAGTAC  
>HPV61\_Alpha\_9628574\_nt6781\_Genome\_Tile\_rc|1  
TGTGGCTTTATATTCAGATACAGGGGGGGATGTAGCAGTACAAATGGTTAAATTAGTACT  
>HPV61\_Alpha\_9628574\_nt6801\_Genome\_Tile\_rc|1  
CGCAAAATATCCCTAAAGCTTGTGGCTTTATATTCAGATACAGGGGGGGATGTAGCAGTA  
>HPV61\_Alpha\_9628574\_nt6981\_Genome\_Tile\_rc|1  
GCTCTGGACTGCAAAAACCTATATGTGTCTTCTAAACTGGTAGAGGGTGGTGGTACCACA

>HPV61\_Alpha\_9628574\_nt7261\_Genome\_Tile\_rc|1  
AACAAACACATGCACAACAACAGCATACAGACAAACATCACTACTGTTTACGCTTTTTTGCG  
>HPV61\_Alpha\_9628574\_nt7321\_Genome\_Tile\_rc|1  
TCATACAAACCAGGCACCATACAAACAGCACATGCACAAGGCCAGTACAGCACAATACAA  
>HPV61\_Alpha\_9628574\_nt7361\_Genome\_Tile\_rc|1  
CAGTACAGGGTCACACAATACACAACCATAGCAAATACAGTCATACAAACCAGGCACCAT  
>HPV61\_Alpha\_9628574\_nt7381\_Genome\_Tile\_rc|1  
ACAACACAGGGGACAAGGGTCAGTACAGGGTCACACAATACACAACCATAGCAAATACAG  
>HPV61\_Alpha\_9628574\_nt7401\_Genome\_Tile\_rc|1  
AACACACATTCCACAGATACACAACACAGGGGACAAGGGTCAGTACAGGGTCACACAATA  
>HPV61\_Alpha\_9628574\_nt7521\_Genome\_Tile\_rc|1  
GGAACACAGAAATGGGGAAGCTGCACAAAAAATAAGGCGTGCAACAATAAACACACTTACTC  
>HPV61\_Alpha\_9628574\_nt7661\_Genome\_Tile\_rc|1  
AAGTTTGTTTAAACAGGATGTGGTATGTGTACAGTGGCATAGTGCCACAACCAAAAAGGC  
>HPV61\_Alpha\_9628574\_nt7681\_Genome\_Tile\_rc|1  
ACACCCAGGTGCAACACATAAAGTTTGTTTAAACAGGATGTGGTATGTGTACAGTGGCAT  
>HPV61\_Alpha\_9628574\_nt7701\_Genome\_Tile\_rc|1  
GTGTTAGCAACCTGTCAAACACACCCAGGTGCAACACATAAAGTTTGTTTAAACAGGATG  
>HPV61\_Alpha\_9628574\_nt7741\_Genome\_Tile\_rc|1  
ATGTCAAAAAAGATAGATGGAGCATTGTTCCAAACTGTGTGTGTTAGCAACCTGTCAAAC  
>HPV61\_Alpha\_9628574\_nt7761\_Genome\_Tile\_rc|1  
AAGCACAGTAATTGCACAACATGTCAAAAAAGATAGATGGAGCATTGTTCCAAACTGTGT  
>HPV61\_Alpha\_9628574\_nt7841\_Genome\_Tile\_rc|1  
AGTTTCTCGGCTAGAAAAGTATACAAGCAATGCCAAACCAGCAATTAAGGGAAAGTAGTC  
>HPV61\_Alpha\_9628574\_nt7861\_Genome\_Tile\_rc|1  
CATGCCCAAAGTTGCAAGACAGTTTCTCGGCTAGAAAAGTATACAAGCAATGCCAAACCA  
>HPV61\_Alpha\_9628574\_nt7881\_Genome\_Tile\_rc|1  
GTAACATAATGTGTGTAAACATGCCCAAAGTTGCAAGACAGTTTCTCGGCTAGAAAAGT  
>HPV7\_Alpha\_9627389\_nt0281\_Genome\_Tile\_rc|1  
CTAAAGTTCTTACTGATTCACCTTTTCCATAAAATCTAAACACTTTACACACGCTGCA  
>HPV7\_Alpha\_9627389\_nt0721\_Genome\_Tile\_rc|1  
GTACAATGGACTACTAGGCGAACTAAACAGTGACAAAATACACAATGTGTTACTATTTTA  
>HPV7\_Alpha\_9627389\_nt0741\_Genome\_Tile\_rc|1  
CCTGCCTTATATCAGTAGCAGTACAATGGACTACTAGGCGAACTAAACAGTGACAAAATA  
>HPV7\_Alpha\_9627389\_nt0981\_Genome\_Tile\_rc|1  
CTTACTACAGTATCATTAATAAAATCTACCATATCATATCCACTGTCTCTATAGCATCC  
>HPV7\_Alpha\_9627389\_nt1001\_Genome\_Tile\_rc|1  
TACTTAGTTCTTCATGTTCACTTACTACAGTATCATTAATAAAATCTACCATATCATATC  
>HPV7\_Alpha\_9627389\_nt1341\_Genome\_Tile\_rc|1  
AGCACTTCAACCGCTTCCGTTTCAACTGTGCGAGCCCTCCCACTGCCCCCTCTATACCT  
>HPV7\_Alpha\_9627389\_nt1381\_Genome\_Tile\_rc|1  
ACGCGGACTAAGTTGCTGTATAACATCACTGCTTCTCTAGCACTTCAACCGCTTCCGT  
>HPV7\_Alpha\_9627389\_nt1481\_Genome\_Tile\_rc|1  
GTCTAACCAAAATCGTGAAAGCCCACTCCAAAAAGTTCCCTTAAACTTACCACACAGTTTAG  
>HPV7\_Alpha\_9627389\_nt1621\_Genome\_Tile\_rc|1  
CCATCTACACGTTGTCCACTGTGTATGTAAGTATAATGCCTGTCTTTTAATAATGTATG  
>HPV7\_Alpha\_9627389\_nt1761\_Genome\_Tile\_rc|1  
GCCGCTGCAGAACTTTGTAATTTAGGTGGTTGTACCATTAGTTGATTATCTGGTACATTT  
>HPV7\_Alpha\_9627389\_nt2521\_Genome\_Tile\_rc|1  
ATGTTTAATGTTTATATTTGATGTTAACAATAATGGAGGACATTTAATCACAGCCAATGA  
>HPV7\_Alpha\_9627389\_nt2541\_Genome\_Tile\_rc|1  
AAATATTGATATTTGCAATCATGTTTAATGTTTATATTTGATGTTAACAATAATGGAGGA  
>HPV7\_Alpha\_9627389\_nt2561\_Genome\_Tile\_rc|1  
ACACTGTCACTCTACTCTGTAAATATTGATATTTGCAATCATGTTTAATGTTTATATTTG  
>HPV7\_Alpha\_9627389\_nt3341\_Genome\_Tile\_rc|1

GTCGGTGGCCGCGGGATGTCTGATGTCAACAGGCGCAACAATGGGTAGCCCTTCGACAGT  
>HPV7\_Alpha\_9627389\_nt3501\_Genome\_Tile\_rc|1  
TGTCCACGTATTTTCTTCCACTACATCCGTCCACTGCACTGATGGACAAGTCTCCGTCTC  
>HPV7\_Alpha\_9627389\_nt3821\_Genome\_Tile\_rc|1  
TATTTACATTATAGTTAACATGCCTAACTATGTTTAATAGTTTTAGGTATTTTTACAAG  
>HPV7\_Alpha\_9627389\_nt3841\_Genome\_Tile\_rc|1  
TTTTTACAAATATACAAACATATTTACATTATAGTTAACATGCCTAACTATGTTTAATA  
>HPV7\_Alpha\_9627389\_nt3861\_Genome\_Tile\_rc|1  
GTTGCGTTCCATACATATGTTTTTTACAAATATACAAACATATTTACATTATAGTTAACA  
>HPV7\_Alpha\_9627389\_nt3881\_Genome\_Tile\_rc|1  
CATATGCATTACCCTTCACAGTTGCGTTCCATACATATGTTTTTTACAAATATACAAACA  
>HPV7\_Alpha\_9627389\_nt4001\_Genome\_Tile\_rc|1  
CAGGTATATGCATGCATATTAATAATTGCAGTTATAAGACAGAGTATATATACTATTAGTA  
>HPV7\_Alpha\_9627389\_nt4021\_Genome\_Tile\_rc|1  
AGAGCTCCAGACACAGAAATCAGGTATATGCATGCATATTAAATTTGCAGTTATAAGACA  
>HPV7\_Alpha\_9627389\_nt4041\_Genome\_Tile\_rc|1  
ATAGAAATAGTGGCCATCAAAGAGCTCCAGACACAGAAATCAGGTATATGCATGCATATT  
>HPV7\_Alpha\_9627389\_nt4061\_Genome\_Tile\_rc|1  
CCCACGTTATAAAGCAAAGAATAGAAATAGTGGCCATCAAAGAGCTCCAGACACAGAAAT  
>HPV7\_Alpha\_9627389\_nt4081\_Genome\_Tile\_rc|1  
AATAATAGATGTTAGTGCACCCACGTTATAAAGCAAAGAATAGAAATAGTGGCCATCAA  
>HPV7\_Alpha\_9627389\_nt4101\_Genome\_Tile\_rc|1  
AACACTAAAAAATACGTTAATAATAGATGTTAGTGCACCCACGTTATAAAGCAAAGA  
>HPV7\_Alpha\_9627389\_nt4141\_Genome\_Tile\_rc|1  
TGACATATGAAGGAACAGTGCAGGCAAATACCACACTAACAACACTAAAAAATACGTT  
>HPV7\_Alpha\_9627389\_nt4161\_Genome\_Tile\_rc|1  
TGTTGTATAGCATACACAATTGACATATGAAGGAACAGTGCAGGCAAATACCACACTAAC  
>HPV7\_Alpha\_9627389\_nt4341\_Genome\_Tile\_rc|1  
ATTTATTTAATACACAGTATTTTACTTACTATATTTGTATACATATAATGTCCTACAATG  
>HPV7\_Alpha\_9627389\_nt4781\_Genome\_Tile\_rc|1  
CTGATGATGTTATTGAAAACCCACCCTCTGTGGGAATTACTGGCGAAGGAGCCCCAGACT  
>HPV7\_Alpha\_9627389\_nt4821\_Genome\_Tile\_rc|1  
TTAGTAGAAGATATATCTAAATTTGCAGGGACATCTGTACCTGATGATGTTATTGAAAAC  
>HPV7\_Alpha\_9627389\_nt4841\_Genome\_Tile\_rc|1  
TAGATGTAACATGTACTGTATTAGTAGAAGATATATCTAAATTTGCAGGGACATCTGTAC  
>HPV7\_Alpha\_9627389\_nt4861\_Genome\_Tile\_rc|1  
TATGGGGTTATGGTGTGTGGTAGATGTAACATGTACTGTATTAGTAGAAGATATATCTAA  
>HPV7\_Alpha\_9627389\_nt5081\_Genome\_Tile\_rc|1  
CTACTATTTCTACTTGCTGCAAAGCTTTGCTATATAGCCCACTTTAGGCCGCGCTGACA  
>HPV7\_Alpha\_9627389\_nt5101\_Genome\_Tile\_rc|1  
GGTGGACATAAATGTTGGATCTACTATTTCTACTTGCTGCAAAGCTTTGCTATATAGCCC  
>HPV7\_Alpha\_9627389\_nt5201\_Genome\_Tile\_rc|1  
AGGCAGGATCTGGTGCCTTATGAATAGAAGGCTGTTCAAATGTAGTGTATCTTCAATGT  
>HPV7\_Alpha\_9627389\_nt5221\_Genome\_Tile\_rc|1  
TAAAGTAATGATATCCATAAAGGCAGGATCTGGTGCCTTATGAATAGAAGGCTGTTCAA  
>HPV7\_Alpha\_9627389\_nt5261\_Genome\_Tile\_rc|1  
AACGTACCACACCACGCCTAGAGGTCAAGGCAGGCCTATGTAAAGTAATGATATCCATAA  
>HPV7\_Alpha\_9627389\_nt5441\_Genome\_Tile\_rc|1  
TATCATCTATATCTGCATAAACATCAAAAAGGTCACCTGTTATTAGGTGAGGCCACTAGAG  
>HPV7\_Alpha\_9627389\_nt5461\_Genome\_Tile\_rc|1  
ATATAATATATTTTCATCAATATCATCTATATCTGCATAAACATCAAAAAGGTCACCTGTT  
>HPV7\_Alpha\_9627389\_nt5481\_Genome\_Tile\_rc|1  
GTATTATTGTCTATAGTAGAATATAATATATTTTCATCAATATCATCTATATCTGCATAA  
>HPV7\_Alpha\_9627389\_nt5501\_Genome\_Tile\_rc|1  
AGGAATAGGTAGAAGTTGGTGTATTATTGTCTATAGTAGAATATAATATATTTTCATCAA



>HPV7\_Alpha\_9627389\_nt5521\_Genome\_Tile\_rc|1  
TGTAGAATTACCTGGATACAAGGAATAGGTAGAAGTTGGTGTATTATTGTCTATAGTAGA  
>HPV7\_Alpha\_9627389\_nt5541\_Genome\_Tile\_rc|1  
ATAGATGTATTTGCTATGCGTGTAGAATTACCTGGATACAAGGAATAGGTAGAAGTTGGT  
>HPV7\_Alpha\_9627389\_nt5561\_Genome\_Tile\_rc|1  
CAGGAATTGTGGCAAGAGGTATAGATGTATTTGCTATGCGTGTAGAATTACCTGGATACA  
>HPV7\_Alpha\_9627389\_nt5901\_Genome\_Tile\_rc|1  
TAGGCTTTTTTCAATTCAAAATATGGATGTCCTATGGTTAATAACCTGGTACTACCTGCAT  
>HPV7\_Alpha\_9627389\_nt5921\_Genome\_Tile\_rc|1  
AGGCACCGATACATCGCCATTAGGCTTTTTTCAATTCAAAATATGGATGTCCTATGGTTAA  
>HPV7\_Alpha\_9627389\_nt5941\_Genome\_Tile\_rc|1  
TATTGATGTCCAGACACTTTAGGCACCGATACATCGCCATTAGGCTTTTTTCAATTCAAAA  
>HPV7\_Alpha\_9627389\_nt6161\_Genome\_Tile\_rc|1  
GCTGTCTTGACCAGGTACTGTTCCATATACAGACGAGTTTCCACATCTTCATCTTTATT  
>HPV7\_Alpha\_9627389\_nt6961\_Genome\_Tile\_rc|1  
GGAGGACCAATTTTAAAATTCCAATCATCTAATAAGGAAGAATCCATAGCATGTATATAT  
>HPV7\_Alpha\_9627389\_nt6981\_Genome\_Tile\_rc|1  
CTTCCAAGGTTGCAGACGCTGGAGGACCAATTTTAAAATTCCAATCATCTAATAAGGAAG  
>HPV7\_Alpha\_9627389\_nt7021\_Genome\_Tile\_rc|1  
TGACATGCTATGGCTTTTATTGGTAAGAAACCTATAAGTATCTTCCAAGGTTGCAGACGCT  
>HPV7\_Alpha\_9627389\_nt7361\_Genome\_Tile\_rc|1  
AAACAACATATACAAACACACATACATAAACAACACATACATACATTCCAGAGTAACAAC  
>HPV7\_Alpha\_9627389\_nt7421\_Genome\_Tile\_rc|1  
TTATTAAACAAACACAACAACAATACATTACATTACATACACACAAATACATTCTCACACAT  
>HPV7\_Alpha\_9627389\_nt7461\_Genome\_Tile\_rc|1  
ACAAAGAAAAGTACTTTACCACACAACACACAATATATTTATTATTAAACAAACACAACAAC  
>HPV7\_Alpha\_9627389\_nt7481\_Genome\_Tile\_rc|1  
TTTAATAAGTAACTTTTAAAACAAAGAAAGTACTTTACCACACAACACACAATATATTTA  
>HPV7\_Alpha\_9627389\_nt7601\_Genome\_Tile\_rc|1  
AGTTATATAAAGCTAACAATTTTAAACATGTTATAAAAACATGCTGACAAATGTAATGAG  
>HPV7\_Alpha\_9627389\_nt7621\_Genome\_Tile\_rc|1  
GGAAATTGAAGGATTTATATAGTTATATAAAGCTAACAATTTTAAACATGTTATAAAAAAC  
>HPV7\_Alpha\_9627389\_nt7641\_Genome\_Tile\_rc|1  
GACTGGAAACGGTTATGGGTGGAAATTGAAGGATTTATATAGTTATATAAAGCTAACAAT  
>HPV7\_Alpha\_9627389\_nt7681\_Genome\_Tile\_rc|1  
AATGCAAATATGCTGACAAACATGGTGACTTGCCAACCGAGACTGGAAACGGTTATGGGT  
>HPV7\_Alpha\_9627389\_nt7761\_Genome\_Tile\_rc|1  
GGTGTGGCAACCTCACCTAATAGTACATATTGGGCGGCATTTTTTGGCAGGGAACCTTGA  
>HPV7\_Alpha\_9627389\_nt7801\_Genome\_Tile\_rc|1  
AAAATAAGATGAGTAACAGTGCAATAAAAGTGTAATTAAAGGTGTGGCAACCTCACCTA  
>HPV10\_Alpha\_9627257\_nt3901\_Genome\_Tile\_rc|1  
AGAATGTACAATCACCTATAGATCTATATATGTATAGAAATATCTGACATATTAGAATA  
>HPV10\_Alpha\_9627257\_nt3921\_Genome\_Tile\_rc|1  
GTCGACACAAGTAAAAATCCAGAATGTACAATCACCTATAGATCTATATATGTATAGAA  
>HPV10\_Alpha\_9627257\_nt4221\_Genome\_Tile\_rc|1  
CCAAGATGTCTATATAACACAAACAGTGCTATTATAACAAAAATGATTACACACAGTAGT  
>HPV10\_Alpha\_9627257\_nt4241\_Genome\_Tile\_rc|1  
ACATATTATGTTACAATAACCAAGATGTCTATATAACACAAACAGTGCTATTATAACAA  
>HPV10\_Alpha\_9627257\_nt4261\_Genome\_Tile\_rc|1  
TGGGATCCGTACAGGCTACCACATATTATGTTACAATACACCAAGATGTCTATATAACAC  
>HPV10\_Alpha\_9627257\_nt4281\_Genome\_Tile\_rc|1  
ATGATATACAACCCCTATGTGGGATCCGTACAGGCTACCACATATTATGTTACAATACA  
>HPV10\_Alpha\_9627257\_nt4301\_Genome\_Tile\_rc|1  
GGTACACACAACAACAACATATGATATACAACCCCTATGTGGGATCCGTACAGGCTACC  
>HPV10\_Alpha\_9627257\_nt4321\_Genome\_Tile\_rc|1

GTGCCACAATAGCACACTAGGGTACACACAACAACATATGATATACAACCCCCTATG  
>HPV10\_Alpha\_9627257\_nt4341\_Genome\_Tile\_rc|1  
ACAAAAATAGAAAAAGAATGGTGCCACAATAGCACACTAGGGTACACACAACAACAT  
>HPV10\_Alpha\_9627257\_nt4361\_Genome\_Tile\_rc|1  
ATTTAACTGTAAAAAACAACAATAGAAAAAGAATGGTGCCACAATAGCACACTAG  
>HPV10\_Alpha\_9627257\_nt5501\_Genome\_Tile\_rc|1  
ATATCCCCTGGACTGTGTGGTACTACGATATCCCTCTGTAAAAGCAACATCACCATCATC  
>HPV10\_Alpha\_9627257\_nt6621\_Genome\_Tile\_rc|1  
ACCAACGTCTCGCCCCCACC GTTGTCTTTAATATGAAAGTGTCTGGGATGGCGTCTCC  
>HPV10\_Alpha\_9627257\_nt6821\_Genome\_Tile\_rc|1  
GTGGCAGGGGAGGCCTCAGAAGGAACACACAAGCACATATTGGTACTGCGAGTCGTGTCT  
>HPV5\_Beta\_9627145\_nt0001\_Genome\_Tile\_rc|1  
CCATTATAATTGTGAAATCCCAATACCGCACCTGGTACAAGGAAATTGCAACTTACCGTT  
>HPV5\_Beta\_9627145\_nt0121\_Genome\_Tile\_rc|1  
CCAATCTTAGACACTTATATATATATATATTTATTTATGTATACATATATTGGATATTAT  
>HPV5\_Beta\_9627145\_nt0141\_Genome\_Tile\_rc|1  
TTGCCTGATTACAGAAGAACCCAATCTTAGACACTTATATATATATATTTATTTATGT  
>HPV5\_Beta\_9627145\_nt0161\_Genome\_Tile\_rc|1  
GTGTTCCGGCTCCCTCAGCCATTGCCTGATTACAGAAGAACCCAATCTTAGACACTTATAT  
>HPV5\_Beta\_9627145\_nt0181\_Genome\_Tile\_rc|1  
TTTTCTGTCAGTTTCTGTTGGTGTTCGGCTCCCTCAGCCATTGCCTGATTACAGAAGAAC  
>HPV5\_Beta\_9627145\_nt0201\_Genome\_Tile\_rc|1  
AAGGTAATTCTGCCTTATCTTTTTCTGTCAGTTTCTGTTGGTGTTCGGCTCCCTCAGCCA  
>HPV5\_Beta\_9627145\_nt0221\_Genome\_Tile\_rc|1  
AGCTAAGTCTCTAATACTTAAAGGTAATTCTGCCTTATCTTTTTCTGTCAGTTTCTGTTG  
>HPV5\_Beta\_9627145\_nt0241\_Genome\_Tile\_rc|1  
ACAGGGATGCCTAAGGCTTCAGCTAAGTCTCTAATACTTAAAGGTAATTCTGCCTTATCT  
>HPV5\_Beta\_9627145\_nt0261\_Genome\_Tile\_rc|1  
AAGGTATTAAACAATCAATCACAGGGATGCCTAAGGCTTCAGCTAAGTCTCTAATACTTA  
>HPV5\_Beta\_9627145\_nt0281\_Genome\_Tile\_rc|1  
AAAGTTGCCACAGAAATTGCAAGGTATTAAACAATCAATCACAGGGATGCCTAAGGCTTC  
>HPV5\_Beta\_9627145\_nt0341\_Genome\_Tile\_rc|1  
ATCTTTCCAAATTAGACTAAGCCTTTTG TAGTCAATTACACAAGCTTCCAAATAATTTAG  
>HPV5\_Beta\_9627145\_nt0381\_Genome\_Tile\_rc|1  
TGGCGCCACAGCATACGCGACAGCAGCAAACACACAATAATCTTTCCAAATTAGACTAA  
>HPV5\_Beta\_9627145\_nt0421\_Genome\_Tile\_rc|1  
ACTGTCTGCTCATAAAATTGGTTAAATTCATAAGTTGCAGTGGCGCCACAGCATACGCGA  
>HPV5\_Beta\_9627145\_nt2041\_Genome\_Tile\_rc|1  
AGATATACTCATGTCTCTCATTTGTCCCTTCTTATAAAATCGTACCATATATGCACATTC  
>HPV5\_Beta\_9627145\_nt2061\_Genome\_Tile\_rc|1  
ATTTTAGTGTATATCCATTAGATATACTCATGTCTCTCATTTGTCCCTTCTTATAAAAT  
>HPV5\_Beta\_9627145\_nt2081\_Genome\_Tile\_rc|1  
CTTCCCTTCTACTTCATTGATTTTAGTGTATATCCATTAGATATACTCATGTCTCTCA  
>HPV5\_Beta\_9627145\_nt2161\_Genome\_Tile\_rc|1  
GAATTCTTTAATGCAGTTAGGAATACAATAAAGTTTATATTTTGGTATCTAATAAACTT  
>HPV5\_Beta\_9627145\_nt2961\_Genome\_Tile\_rc|1  
CTATGCTGGTATCAACTAGAGTCCATGGCTCATGAGCAAAATCAGATGTCTGTAGTGACT  
>HPV5\_Beta\_9627145\_nt3761\_Genome\_Tile\_rc|1  
TCGTGACCTCTCGACCCTCGGGCCCTCTGGTTGTTGAACTTTCGGCTCGTGCCCGCTG  
>HPV5\_Beta\_9627145\_nt4021\_Genome\_Tile\_rc|1  
TTAATTTTAGCTCTGTTGCGGACATTTTTCAGTGTGTTAGCCGCCCTTTGACAATGATT  
>HPV5\_Beta\_9627145\_nt4181\_Genome\_Tile\_rc|1  
CTTATCAACTCCTTTGGGGTATCGCACCGCTTCATCAAAATCTCTCCTTTGAGTATAGGA  
>HPV5\_Beta\_9627145\_nt4661\_Genome\_Tile\_rc|1  
CTGTGGACTCAGTTAGAGGGACCACGGATGATGCTGTAGGTTCCACGGGGTTAACTGTAT

>HPV5\_Beta\_9627145\_nt4921\_Genome\_Tile\_rc|1  
ACCCGATGTCACCAAAACGTGATCTGCAAGAGACGATTCCCCTTGTGCTGGAGTAGACTC  
>HPV5\_Beta\_9627145\_nt5001\_Genome\_Tile\_rc|1  
ATTTCAAATGTATACCTACTAGGAATTTCTCTAACTCAATTATGTCAGTTATATCACCC  
>HPV5\_Beta\_9627145\_nt5101\_Genome\_Tile\_rc|1  
TACTAAACGTCTATTAGTCAAAGAGAAACCCCTCCTACGGCCTACAGATTGATTGCGTGG  
>HPV5\_Beta\_9627145\_nt5161\_Genome\_Tile\_rc|1  
AAAACGAACTAACTTAGATGGTTGAGTTAGAAACAATGGATTGTCCACTTGTACCTGCTG  
>HPV5\_Beta\_9627145\_nt5441\_Genome\_Tile\_rc|1  
GGCCTAATAATTGTAATTC AATAGGATCTTCAGTATTAATAGAGCTAAGATCTCTGTAAA  
>HPV5\_Beta\_9627145\_nt5561\_Genome\_Tile\_rc|1  
CTAATAATAAATCATGTGAATATGCTTCAATGCTTTCAGATAATGGATTTTCAGAAATAT  
>HPV5\_Beta\_9627145\_nt5581\_Genome\_Tile\_rc|1  
GAAATCTTCCACCGTTTCATCTAATAATAAATCATGTGAATATGCTTCAATGCTTTCAGA  
>HPV5\_Beta\_9627145\_nt5601\_Genome\_Tile\_rc|1  
ATAACCAGCTGAGACCCACTGAAATCTTCCACCGTTTCATCTAATAATAAATCATGTGAA  
>HPV5\_Beta\_9627145\_nt5621\_Genome\_Tile\_rc|1  
TTGTGCTCCTTCGATTACCTATAACCAGCTGAGACCCACTGAAATCTTCCACCGTTTCAT  
>HPV5\_Beta\_9627145\_nt6281\_Genome\_Tile\_rc|1  
CTTTAGAAAATGTTATGTATGCATTACTGTTTTCTGTATCTTTTACTTTATTGAAATAAG  
>HPV5\_Beta\_9627145\_nt6521\_Genome\_Tile\_rc|1  
AACTGACATCTGATCTACTATCTTGAAGTGCCTTAAAATTCATGTTCCCAAACCTATGT  
>HPV5\_Beta\_9627145\_nt6961\_Genome\_Tile\_rc|1  
AACATCTTTTGTAGTGCTCCAGCCTGATTATATACAGAAATACTGAAATTAGTATTTCTTGT  
>HPV5\_Beta\_9627145\_nt7001\_Genome\_Tile\_rc|1  
GTCTTTGATATTCTCTAAATTGATCTGCATTATAGTCTGCAACATCTTTTGTAGTGCTCCAG  
>HPV5\_Beta\_9627145\_nt7081\_Genome\_Tile\_rc|1  
ATTGATCTGTGCCAATACCTGTGCCTTTAAAGGAACCTTACAGAGTTGTAGAATTAAAGA  
>HPV5\_Beta\_9627145\_nt7221\_Genome\_Tile\_rc|1  
TCTTCCTTTTCTTTCGGAGGATTCTTATCTGGACACCGTGTAGCCAAAGAGTCAATATAT  
>HPV5\_Beta\_9627145\_nt7441\_Genome\_Tile\_rc|1  
AGTTTATAAAAATGTACCACCTTTCGGTCAGACCTCAATTTTTTACGTTTGCGTTTTGTTCC  
>HPV5\_Beta\_9627145\_nt7581\_Genome\_Tile\_rc|1  
CTGAGTCCAAGACGGTGTGTTTGGCACTGATCTGATTCTATATTGGCAACAACCTTGACTG  
>HPV5\_Beta\_9627145\_nt7601\_Genome\_Tile\_rc|1  
TATAACGAACACGGTCTGTTCTGAGTCCAAGACGGTGTGTTTGGCACTGATCTGATTCTA  
>HPV4\_Gamma\_9626597\_nt0201\_Genome\_Tile\_rc|1  
TCCTCTAAATACTAACTAAGTTTCTTAAAGATAGAATAAAGCAAGATCCGCAAGATCGAC  
>HPV4\_Gamma\_9626597\_nt0221\_Genome\_Tile\_rc|1  
CAACATGCATAATAACAATTTCTCTAAATACTAACTAAGTTTCTTAAAGATAGAATAAA  
>HPV4\_Gamma\_9626597\_nt0241\_Genome\_Tile\_rc|1  
TTAATCTTAAAGCATTCAGAACACATGCATAATAACAATTTCTCTAAATACTAACTAA  
>HPV4\_Gamma\_9626597\_nt0361\_Genome\_Tile\_rc|1  
GTAATCTAAGGCAGCAAATGCATCTAATGCAAATTTCTTAAATCTTTTCTGAGCAATTT  
>HPV4\_Gamma\_9626597\_nt0381\_Genome\_Tile\_rc|1  
TAATTTCTCAACAATATCAAGTAATCTAAGGCAGCAAATGCATCTAATGCAAATTTCTTT  
>HPV4\_Gamma\_9626597\_nt0401\_Genome\_Tile\_rc|1  
TCGTCAGAGTATAATAAATCTAATTTCTCAACAATATCAAGTAATCTAAGGCAGCAAATG  
>HPV4\_Gamma\_9626597\_nt0681\_Genome\_Tile\_rc|1  
TCCGTAGTCCGAGCTCAGCAGCATACAATGTAATTCCTTACAGCAACTTCACATCTATAGC  
>HPV4\_Gamma\_9626597\_nt0721\_Genome\_Tile\_rc|1  
CAAAACGTCAGCTTTCTTCTACAAGAAGTTGTTCCAAGGTCCGTAGTCCGAGCTCAGCA  
>HPV4\_Gamma\_9626597\_nt0901\_Genome\_Tile\_rc|1  
CATCAATTAAGTTAGAAATGTTTGAATCGTCATTACTTTTCGTGCGATAAATCATCCAACG  
>HPV4\_Gamma\_9626597\_nt1381\_Genome\_Tile\_rc|1

GCTTTAAACAATCTTTGAACTTTCTAATACTTCAACAGCAGCTCTAAAAATAACTATTA  
>HPV4\_Gamma\_9626597\_nt1521\_Genome\_Tile\_rc|1  
ACATAACATTTGATATTCTTGGATATTTAATATAGAACACATCAACTTTTGTACAGTTTC  
>HPV4\_Gamma\_9626597\_nt2761\_Genome\_Tile\_rc|1  
AGATGCAAAGGGAGATTTTAACAATGATTGCAAAGTTAAATGTATCTGAATAGCTTGCTT  
>HPV4\_Gamma\_9626597\_nt2781\_Genome\_Tile\_rc|1  
TCTGTCAATGTCCACCGTTCAGATGCAAAGGGAGATTTTAACAATGATTGCAAAGTTAAA  
>HPV4\_Gamma\_9626597\_nt2801\_Genome\_Tile\_rc|1  
TTATCAGTTCTGCACTAACATCTGTCAATGTCCACCGTTCAGATGCAAAGGGAGATTTTA  
>HPV4\_Gamma\_9626597\_nt3621\_Genome\_Tile\_rc|1  
GTGCTATCAAAATGCAATAAGCATGCGACTATGATTATGTGAGCAATCTCCAACCCAGTTC  
>HPV4\_Gamma\_9626597\_nt3641\_Genome\_Tile\_rc|1  
CAAAGCGTCTCTTTGGTCAGTGCTATCAAATGCAATAAGCATGCGACTATGATTATGTG  
>HPV4\_Gamma\_9626597\_nt3661\_Genome\_Tile\_rc|1  
AGGAAAAAGGTTGTGTTTTACAAAAGCGTCTCTTTGGTCAGTGCTATCAAATGCAATAAG  
>HPV4\_Gamma\_9626597\_nt3681\_Genome\_Tile\_rc|1  
TAGGTATATGTACACAGTTTAGGAAAAAGGTTGTGTTTTACAAAAGCGTCTCTTTGGTCA  
>HPV4\_Gamma\_9626597\_nt3701\_Genome\_Tile\_rc|1  
ATAAACTATTCAATGAGCCGTAGGTATATGTACACAGTTTAGGAAAAAGGTTGTGTTTTA  
>HPV4\_Gamma\_9626597\_nt3721\_Genome\_Tile\_rc|1  
CTACTCAAGCTTTGCATTTTATAAACTATTCAATGAGCCGTAGGTATATGTACACAGTTT  
>HPV4\_Gamma\_9626597\_nt3741\_Genome\_Tile\_rc|1  
GAACTGAATCTCTTTTCCTTCTACTCAAGCTTTGCATTTTATAAACTATTCAATGAGCCG  
>HPV4\_Gamma\_9626597\_nt4001\_Genome\_Tile\_rc|1  
TATTTCTGAGGGTCCCAAACCTTTCCACAGGCACTGTAGGCCTTACTAAAGTACCACTAGG  
>HPV4\_Gamma\_9626597\_nt4021\_Genome\_Tile\_rc|1  
TCTATTGCATCTATTGGGATTATTTCTGAGGGTCCCAAACCTTTCCACAGGCACTGTAGGC  
>HPV4\_Gamma\_9626597\_nt4041\_Genome\_Tile\_rc|1  
CAACAGAAGATGTTGTTGGGTCTATTGCATCTATTGGGATTATTTCTGAGGGTCCCAAAC  
>HPV4\_Gamma\_9626597\_nt4061\_Genome\_Tile\_rc|1  
GGTCAGATCCTCTAATGGCACAACAGAAGATGTTGTTGGGTCTATTGCATCTATTGGGAT  
>HPV4\_Gamma\_9626597\_nt4101\_Genome\_Tile\_rc|1  
TTCTCTTGTATCTCCACTATCTACTGTGACATCTGGGATGGTCAGATCCTCTAATGGCA  
>HPV4\_Gamma\_9626597\_nt4121\_Genome\_Tile\_rc|1  
CTGAAGAGTAGTCTCCCTATTCTCTTGTATCTCCACTATCTACTGTGACATCTGGGAT  
>HPV4\_Gamma\_9626597\_nt4141\_Genome\_Tile\_rc|1  
GAAATATCTACTTGTGCAGGCTGAAGAGTAGTCTCCCTATTCTCTTGTATCTCCACTA  
>HPV4\_Gamma\_9626597\_nt4161\_Genome\_Tile\_rc|1  
ATATAGGGTCATGTGATGTTGAAATATCTACTTGTGCAGGCTGAAGAGTAGTCTCCCTA  
>HPV4\_Gamma\_9626597\_nt4181\_Genome\_Tile\_rc|1  
GCTAGCACCAAGTGACATCTGATATAGGGTCATGTGATGTTGAAATATCTACTTGTGCAGG  
>HPV4\_Gamma\_9626597\_nt4281\_Genome\_Tile\_rc|1  
CCCTAGTTGCCAATGCTATCCGTTTTGTGGGAGGTTCTATAGGGGACACATCTAACACTG  
>HPV4\_Gamma\_9626597\_nt4301\_Genome\_Tile\_rc|1  
ATGTGGAGTTGCTGAGGCTCCCTAGTTGCCAATGCTATCCGTTTTGTGGGAGGTTCTAT  
>HPV4\_Gamma\_9626597\_nt4321\_Genome\_Tile\_rc|1  
GTGCCAGATATGACACTTACATGTGGAGTTGCTGAGGCTCCCTAGTTGCCAATGCTATC  
>HPV4\_Gamma\_9626597\_nt4441\_Genome\_Tile\_rc|1  
TCGAATTCTTGAAAGGGGTTCAACGGTTCTAATGGAATTTCTTCTGTATAACCAATGGAA  
>HPV4\_Gamma\_9626597\_nt4521\_Genome\_Tile\_rc|1  
TATTATATAAATCCCGTGCTCTTCCTATTGCACGATTTAAACGTCACGTGGTGTACTAG  
>HPV4\_Gamma\_9626597\_nt5041\_Genome\_Tile\_rc|1  
AATGATGTCCCACGTCTGCTACTAGTAAGCACCAAGTGTGACTGACTAAAAATCTTCTGTA  
>HPV4\_Gamma\_9626597\_nt5061\_Genome\_Tile\_rc|1  
GTGGTATTGTAGGTATAGTAAATGATGTCCCACGTCTGCTACTAGTAAGCACCAAGTGTG

>HPV4\_Gamma\_9626597\_nt5081\_Genome\_Tile\_rc|1  
AATTCTAAGACCTAATCCAGGTGGTATTGTAGGTATAGTAAATGATGTCCCACGTCTGCT  
>HPV4\_Gamma\_9626597\_nt5101\_Genome\_Tile\_rc|1  
GAACCTACATCATCTACATAAATTCTAAGACCTAATCCAGGTGGTATTGTAGGTATAGTA  
>HPV4\_Gamma\_9626597\_nt5181\_Genome\_Tile\_rc|1  
GTTCTAGAGGAACAAATGGCTCAGTTGGTAAACCTCCAGCAGGTATTACTCTAGATTCTG  
>HPV4\_Gamma\_9626597\_nt5201\_Genome\_Tile\_rc|1  
TATATCAGATAACAAAGCTGGTTCTAGAGGAACAAATGGCTCAGTTGGTAAACCTCCAGC  
>HPV4\_Gamma\_9626597\_nt5241\_Genome\_Tile\_rc|1  
TGCGATATAAACTAGGACGATATACAAAATCCGTACTAAATATATCAGATAACAAAGCTG  
>HPV4\_Gamma\_9626597\_nt5601\_Genome\_Tile\_rc|1  
CCCTCAGTTTCCATACTAGGCGTTCATGATCAGAATCATAAAAGCCATTATCAATTAAAG  
>HPV4\_Gamma\_9626597\_nt6161\_Genome\_Tile\_rc|1  
CTGATCTTGTGTTGTTTTGAGCACCAATAAAATAATCTGAGGTAGCTTCAAAAGGTTCTGG  
>HPV4\_Gamma\_9626597\_nt6181\_Genome\_Tile\_rc|1  
ATATGAGGTCCATAAGTGTACTGATCTTGTGTTTTGAGCACCAATAAAATAATCTGAG  
>HPV4\_Gamma\_9626597\_nt6201\_Genome\_Tile\_rc|1  
CACTAGGGGTCCCTACATAAATATGAGGTCCATAAGTGTACTGATCTTGTGTTTTGAG  
>HPV4\_Gamma\_9626597\_nt6221\_Genome\_Tile\_rc|1  
TTCCTGGATACTAAAGAGCCACTAGGGGTCCCTACATAAATATGAGGTCCATAAGTGTA  
>HPV4\_Gamma\_9626597\_nt6361\_Genome\_Tile\_rc|1  
CCATCTGACTTCACAGAAATTGTAAAGTTTTGTATTATGAGTGTTATCTACAAGAGTAACA  
>HPV4\_Gamma\_9626597\_nt6381\_Genome\_Tile\_rc|1  
ACTGATAATTGTCTATTAGCACCATCTGACTTCACAGAAATTGTAAAGTTTGTATTATGAG  
>HPV4\_Gamma\_9626597\_nt6401\_Genome\_Tile\_rc|1  
TTTAAATCACTAGCTTTTATACTGATAATTGTCTATTAGCACCATCTGACTTCACAGAAAT  
>HPV4\_Gamma\_9626597\_nt6421\_Genome\_Tile\_rc|1  
TCTATATGTCTGAGGTACTGTTTAAATCACTAGCTTTTATACTGATAATTGTCTATTAGCA  
>HPV4\_Gamma\_9626597\_nt6641\_Genome\_Tile\_rc|1  
ATATGGATCTTCTTTTTTCTAGTTGCAGGGGTCTGTGTAGGGCATCTTGTAGCTCTAGATTG  
>HPV4\_Gamma\_9626597\_nt6781\_Genome\_Tile\_rc|1  
GAAGAACTTATTATTCTTTTACGTTTTAGAGAACCATTAAATTAAACCACTTTGATATAAA  
>HPV4\_Gamma\_9626597\_nt6801\_Genome\_Tile\_rc|1  
TGGTATTAGTTTGTGCATGAGAAGAACTTATTATTCTTTTACGTTTTAGAGAACCATTAA  
>HPV4\_Gamma\_9626597\_nt6881\_Genome\_Tile\_rc|1  
AAGGTTTTTCTTGGCAGAATAAAACATTCCAGAAGAGTTCACATTGTTATTTTCAAGAGACCG  
>HPV4\_Gamma\_9626597\_nt6901\_Genome\_Tile\_rc|1  
ATAATAATTTGGCTCAGTTGAAGGTTTTCTTGGCAGAATAAAACATTCCAGAAGAGTTCA  
>HPV4\_Gamma\_9626597\_nt6921\_Genome\_Tile\_rc|1  
TTGAGATTAAAGAAGATTATATAATAATTTGGCTCAGTTGAAGGTTTTCTTGGCAGAATA  
>HPV4\_Gamma\_9626597\_nt6981\_Genome\_Tile\_rc|1  
ACTATAGTTCACAAAACAGATACATACACGTTTGCAAATCTTATATAATTAGCTCAATT  
>HPV4\_Gamma\_9626597\_nt7001\_Genome\_Tile\_rc|1  
AGTATGTGGCAGTTTATTTCACTATAGTTCACAAAACAGATACATACACGTTTGCAAAT  
>HPV4\_Gamma\_9626597\_nt7081\_Genome\_Tile\_rc|1  
CTACTGATCTGTGTATGCAAATAATTATTGGGGTGCGGACGCATGTTGACCAAATGACTC  
>HPV4\_Gamma\_9626597\_nt7101\_Genome\_Tile\_rc|1  
TGTCCGTCTTGGCGCCTCTCCTACTGATCTGTGTATGCAAATAATTATTGGGGTGCGGAC  
>HPV4\_Gamma\_9626597\_nt7121\_Genome\_Tile\_rc|1  
AAGGAAATTTGAAGAGGATATGTCCGTCTTGGCGCCTCTCCTACTGATCTGTGTATGCAA  
>HPV4\_Gamma\_9626597\_nt7161\_Genome\_Tile\_rc|1  
CGGTCTTTTGTAGCTTACAGTTGTTAAATTTCAATAATTTTAAGGAAATTTGAAGAGGATA  
>HPV4\_Gamma\_9626597\_nt7201\_Genome\_Tile\_rc|1  
CTTTCACTCACCTTTTTTCCCAAGGTTAGAGGAAACGATAACGGTCTTTTGTAGCTTACAG  
>HPV18\_Alpha\_9626069\_nt0061\_Genome\_Tile\_rc|1

CCTCAAAGCGCGCCATAGTATTGTGGTGTGTTTCTCACATCTTTTATATACACCGTTTTTC  
>HPV18\_Alpha\_9626069\_nt0141\_Genome\_Tile\_rc|1  
ACAGGTTATTTCTATGTCTTGCAGTGAAGTGTTTCAGTTCCGTGCACAGATCAGGTAGCTT  
>HPV18\_Alpha\_9626069\_nt0161\_Genome\_Tile\_rc|1  
AATACTGTCTTGCAATATACACAGGTTATTTCTATGTCTTGCAGTGAAGTGTTTCAGTTCC  
>HPV18\_Alpha\_9626069\_nt0501\_Genome\_Tile\_rc|1  
TCGTTGGAGTCGTTCCGTGTCGTGCTCGGTTGCAGCACGAATGGCACTGGCCTCTATAGTG  
>HPV18\_Alpha\_9626069\_nt1361\_Genome\_Tile\_rc|1  
GTCTATAGCCTCCGTACTGCCGCCACTACATACATTGCCGCCATGTTGCCCATTTGTAGT  
>HPV18\_Alpha\_9626069\_nt1401\_Genome\_Tile\_rc|1  
TACCGTCTACACTGCTGTTGTTGCCCTCTGTGCCCCGTTGTCTATAGCCTCCGTACTGC  
>HPV18\_Alpha\_9626069\_nt1441\_Genome\_Tile\_rc|1  
CATTGTGGATTTACATTTTCTATATTGCTATTGTCACTTGTACCGTCTACACTGCTGTTG  
>HPV18\_Alpha\_9626069\_nt1481\_Genome\_Tile\_rc|1  
ATTGTTTACTTTTAAACAAGTCTTTTAATTGTGCTATGGTACATTGTGGATTTACATTTTC  
>HPV18\_Alpha\_9626069\_nt1501\_Genome\_Tile\_rc|1  
GCTAACATAGCTCCTTGTTTATTGTTTACTTTTAAACAAGTCTTTTAATTGTGCTATGGTA  
>HPV18\_Alpha\_9626069\_nt1521\_Genome\_Tile\_rc|1  
CATATGTGTCTTTAAATACTGCTAACATAGCTCCTTGTTTATTGTTTACTTTTAAACAAGT  
>HPV18\_Alpha\_9626069\_nt2241\_Genome\_Tile\_rc|1  
ATGTTATAAACTCTATTTGTTGGTATCGCAGGAATTGCACTATTGGTCTCCAATCTCCCC  
>HPV18\_Alpha\_9626069\_nt2261\_Genome\_Tile\_rc|1  
TGATTTTAAAGGCTCCTAAAAATGTTATAAACTCTATTTGTTGGTATCGCAGGAATTGCAC  
>HPV18\_Alpha\_9626069\_nt3281\_Genome\_Tile\_rc|1  
TCTATATAAAACGTGTTGTACCCTTCCTTTACATAATACAATCCCCTGTGACTTACACAG  
>HPV18\_Alpha\_9626069\_nt3301\_Genome\_Tile\_rc|1  
TTTCACATTCACTTTTAAATTCTATATAAAACGTGTTGTACCCTTCCTTTACATAATACA  
>HPV18\_Alpha\_9626069\_nt3461\_Genome\_Tile\_rc|1  
CCCACGGACACGGTGCTGGAATACGGTGAGGGGGTGCTGTAGCTGTTAACAAGCTGA  
>HPV18\_Alpha\_9626069\_nt3561\_Genome\_Tile\_rc|1  
ACCGAGAAGTGGGTTGACAGGTCCACAATGCTGCTTCTCCGCGAGTCCACAGTGTCCAGG  
>HPV18\_Alpha\_9626069\_nt3581\_Genome\_Tile\_rc|1  
TTGCCTGTAGGTGTAGCTGCACCGAGAAGTGGGTTGACAGGTCCACAATGCTGCTTCTCC  
>HPV18\_Alpha\_9626069\_nt3601\_Genome\_Tile\_rc|1  
AGAGTTTCCGTCTTTTGTGTTGCCTGTAGGTGTAGCTGCACCGAGAAGTGGGTTGACAG  
>HPV18\_Alpha\_9626069\_nt3701\_Genome\_Tile\_rc|1  
TCTCTATAGTGGTCGCTATGTTTTCGCAATCTGTACCGTAAACATTTTAAACTGTTTCTG  
>HPV18\_Alpha\_9626069\_nt3721\_Genome\_Tile\_rc|1  
AATGCCAGGTGGATGATATATCTCTATAGTGGTCGCTATGTTTTCGCAATCTGTACCGTA  
>HPV18\_Alpha\_9626069\_nt3761\_Genome\_Tile\_rc|1  
ACAGTCAGTATTCCTGTTTTTTTCATTGCCTGCACCTGTCCAATGCCAGGTGGATGATATA  
>HPV18\_Alpha\_9626069\_nt3901\_Genome\_Tile\_rc|1  
AAAATAAAAAAATAAGTGATAACATATTGGTACTACAGCATATGTATTACATTGTCATGT  
>HPV18\_Alpha\_9626069\_nt4041\_Genome\_Tile\_rc|1  
AAATACATATACTGTGAATGCTGTGGCAGGGGACGTTATTACCACAATATACACAAATAC  
>HPV18\_Alpha\_9626069\_nt4101\_Genome\_Tile\_rc|1  
CAATTACTGTAAAGACAATATAGCATGTATATGCAATAGTAACATGGGCAATAAAAAACA  
>HPV18\_Alpha\_9626069\_nt4121\_Genome\_Tile\_rc|1  
ACTGTATAAAACAACCTATACAATTACTGTAAAGACAATATAGCATGTATATGCAATAGT  
>HPV18\_Alpha\_9626069\_nt4141\_Genome\_Tile\_rc|1  
AAATATACAATGTACAATACACTGTATAAAACAACCTATACAATTACTGTAAAGACAATA  
>HPV18\_Alpha\_9626069\_nt4161\_Genome\_Tile\_rc|1  
AGCATAAAAAGGTATAAAACAAAATATACAATGTACAATACACTGTATAAAACAACCTATA  
>HPV18\_Alpha\_9626069\_nt4181\_Genome\_Tile\_rc|1  
TTTATTACAAAAATACAAAAAGCATAAAAGGTATAAAACAAAATATACAATGTACAATAC

>HPV18\_Alpha\_9626069\_nt4541\_Genome\_Tile\_rc|1  
CCTAGGTGCACCTGATGTAACCACTGGAGTCCTCTATTAATGTAACAATAGATGGGTC  
>HPV18\_Alpha\_9626069\_nt4621\_Genome\_Tile\_rc|1  
GAAGGTGTGATATCCAAAACCGCAGGTGTAGTTGTACCCGCAGATGTTATATCAAACCCA  
>HPV18\_Alpha\_9626069\_nt4641\_Genome\_Tile\_rc|1  
AAATAGACACAGAGGTAGACGAAGGTGTGATATCCAAAACCGCAGGTGTAGTTGTACCCG  
>HPV18\_Alpha\_9626069\_nt4661\_Genome\_Tile\_rc|1  
ATTGGTAAAAATTGGTTGTGGAAATAGACACAGAGGTAGACGAAGGTGTGATATCCAAAAC  
>HPV18\_Alpha\_9626069\_nt5301\_Genome\_Tile\_rc|1  
TAAAAAATGCAAAGGAGGTAGTAGAACGCGATGGTACAGGCACTGCAGGGTCCATGTCAT  
>HPV18\_Alpha\_9626069\_nt5321\_Genome\_Tile\_rc|1  
AGATATAGTGGGCGAATATTTAAAAAATGCAAAGGAGGTAGTAGAACGCGATGGTACAGG  
>HPV18\_Alpha\_9626069\_nt5341\_Genome\_Tile\_rc|1  
TTACTATAGGAAGAGGCAGAAGATATAGTGGGCGAATATTTAAAAAATGCAAAGGAGGTA  
>HPV18\_Alpha\_9626069\_nt5361\_Genome\_Tile\_rc|1  
AGGTAAAGGGACCGTTACATTACTATAGGAAGAGGCAGAAGATATAGTGGGCGAATATT  
>HPV18\_Alpha\_9626069\_nt5421\_Genome\_Tile\_rc|1  
CAGAGGTAGTAGATGGTAATGTAATATCAGGACCCGTGTATACAGGCACATCCCAAGAGG  
>HPV18\_Alpha\_9626069\_nt5481\_Genome\_Tile\_rc|1  
TACCATGTATACCAATATACTGTGTAGAGGCAGGGGCCGTGGGTGATACAATGGGCCATA  
>HPV18\_Alpha\_9626069\_nt5981\_Genome\_Tile\_rc|1  
ACGTCCTCAGAAACATTAGACGTGGCGGCATGGGAACCTTTCAGTGTCTATCTAATTTATTA  
>HPV18\_Alpha\_9626069\_nt6001\_Genome\_Tile\_rc|1  
CTACAGACACATTGTCCCTAACGTCCTCAGAAACATTAGACGTGGCGGCATGGGAACCTT  
>HPV18\_Alpha\_9626069\_nt6441\_Genome\_Tile\_rc|1  
ACTTGGAGAGGGAGAATACACACAGCTGCCAGGTGAAGCAGGCATACCTGTGCCTTTAAT  
>HPV18\_Alpha\_9626069\_nt6621\_Genome\_Tile\_rc|1  
ATATTGCCCAGGTACAGGAGACTGTGTAGAAGCACATATTGTTAAATTGGTACTGGGAGT  
>HPV18\_Alpha\_9626069\_nt6641\_Genome\_Tile\_rc|1  
TGCTTAAATTTGGTAGCATCATATTGCCCAGGTACAGGAGACTGTGTAGAAGCACATATT  
>HPV18\_Alpha\_9626069\_nt7081\_Genome\_Tile\_rc|1  
CATATTACTTCCTGGCACGTACACGCACACGCTTGGCAGGTTTAGAAGACGTAGTGGCAG  
>HPV18\_Alpha\_9626069\_nt7161\_Genome\_Tile\_rc|1  
CCATACAATGCAATCATACAACAACAACAACACAGGACATACAACAACAACAATAGATG  
>HPV18\_Alpha\_9626069\_nt7201\_Genome\_Tile\_rc|1  
AAATATAGTAACATACAACATACAACAACAACCATACATACCATACAATGCAATCATACA  
>HPV18\_Alpha\_9626069\_nt7221\_Genome\_Tile\_rc|1  
ATTTAATGCCACATACCAACAAATATAGTAACATACAACATACAACAACAACCATACATA  
>HPV18\_Alpha\_9626069\_nt7281\_Genome\_Tile\_rc|1  
ATACAGTTGTTACTCACTAGGGCGCAACCACATAACACACAGAACCACAAAACATATTTT  
>HPV18\_Alpha\_9626069\_nt7321\_Genome\_Tile\_rc|1  
ATATATAGCCCAACAAGCAACCCCATACCACAAACACAAATACAGTTGTTACTCACTAG  
>HPV18\_Alpha\_9626069\_nt7341\_Genome\_Tile\_rc|1  
ATAACTTGAAATACAGGACAATATATAGCCCAACAAGCAACCCCATACCACAAACACAA  
>HPV18\_Alpha\_9626069\_nt7541\_Genome\_Tile\_rc|1  
TGCGCCTTATATGCGCCAAAGAGGCGCGCAATTGTTCAAAATATGTAGGAGCAGTGCCC  
>HPV18\_Alpha\_9626069\_nt7721\_Genome\_Tile\_rc|1  
ATGTTAAGGGTAGACAGAATGTTGGACATGAAAGTAGTTGTACAAGCCAAGTATGCAATT  
>HPV18\_Alpha\_9626069\_nt7741\_Genome\_Tile\_rc|1  
GCTTAGTCATATTATAGTTTCATGTTAAGGGTAGACAGAATGTTGGACATGAAAGTAGTTG  
>HPVFA75/KI88-03\_Unclassified\_206902429\_nt0001\_Genome\_Tile\_rc|1  
ATCAGATAAATGAGTAATATAGCAACCGGCAGCGGTTCAAACAAATAAAAACTTACCGTT  
>HPVFA75/KI88-03\_Unclassified\_206902429\_nt0041\_Genome\_Tile\_rc|1  
TCACATGTATTTAATTAAGGAATGGTTGTTGTAAACCACAATCAGATAAATGAGTAATAT  
>HPVFA75/KI88-03\_Unclassified\_206902429\_nt0121\_Genome\_Tile\_rc|1

CTGTTCTAGGCCTCTCCATCAGTATATGTGTCTCTAATATTCTTCAAGTAATTTTATAGG  
>HPVFA75/KI88-03\_Unclassified\_206902429\_nt0141\_Genome\_Tile\_rc|1  
ATGCCGACTCAGAACTTGTACTGTTCTAGGCCTCTCCATCAGTATATGTGTCTCTAATAT  
>HPVFA75/KI88-03\_Unclassified\_206902429\_nt0161\_Genome\_Tile\_rc|1  
TCTTCTATTGGTATTTCTAAATGCCGACTCAGAACTTGTACTGTTCTAGGCCTCTCCATC  
>HPVFA75/KI88-03\_Unclassified\_206902429\_nt0181\_Genome\_Tile\_rc|1  
ACTTGCATGGTACCAATAAATCTTCTATTGGTATTTCTAAATGCCGACTCAGAACTTGT  
>HPVFA75/KI88-03\_Unclassified\_206902429\_nt0201\_Genome\_Tile\_rc|1  
TGTTAAAAAGCGCTCACAAAACCTTGCATGGTACCAATAAATCTTCTATTGGTATTTCTAA  
>HPVFA75/KI88-03\_Unclassified\_206902429\_nt0221\_Genome\_Tile\_rc|1  
AATTGCAAAAAGTTCTATATATGTTAAAAAGCGCTCACAAAACCTTGCATGGTACCAATAAA  
>HPVFA75/KI88-03\_Unclassified\_206902429\_nt0261\_Genome\_Tile\_rc|1  
TAAATCTTCAATCCAAATGAGTTGCAATTGTTTGTAAATCAAATTGCAAAAAGTTCTATATA  
>HPVFA75/KI88-03\_Unclassified\_206902429\_nt0301\_Genome\_Tile\_rc|1  
CAGCAGATGCATATGCACAACCTAGAGCAAAGAGCATACTAAATCTTCAATCCAAATGA  
>HPVFA75/KI88-03\_Unclassified\_206902429\_nt0321\_Genome\_Tile\_rc|1  
ATAATTTTTGTATTCAAATGCAGCAGATGCATATGCACAACCTAGAGCAAAGAGCATAAC  
>HPVFA75/KI88-03\_Unclassified\_206902429\_nt0361\_Genome\_Tile\_rc|1  
TCACCTGCTCTATTTCTCTGCCTTTGACTGTGCCTTCTAAATAATTTTGTATTCAAATG  
>HPVFA75/KI88-03\_Unclassified\_206902429\_nt0381\_Genome\_Tile\_rc|1  
AAAGCCTACAGACTGTTGAGTCACCTGCTCTATTTCTCTGCCTTTGACTGTGCCTTCTAA  
>HPVFA75/KI88-03\_Unclassified\_206902429\_nt0401\_Genome\_Tile\_rc|1  
TAAATGCATCTGATAGTAATAAAGCCTACAGACTGTTGAGTCACCTGCTCTATTTCTCTG  
>HPVFA75/KI88-03\_Unclassified\_206902429\_nt0421\_Genome\_Tile\_rc|1  
GGTCTAGATGCTTTAAACAATAAATGCATCTGATAGTAATAAAGCCTACAGACTGTTGAG  
>HPVFA75/KI88-03\_Unclassified\_206902429\_nt0441\_Genome\_Tile\_rc|1  
ATTGTCTAACTTTTCTAAAGGTCTAGATGCTTTAAACAATAAATGCATCTGATAGTAAT  
>HPVFA75/KI88-03\_Unclassified\_206902429\_nt0761\_Genome\_Tile\_rc|1  
TAAAGTTCTTGCTGTGTGCGGATTCCAAAGAAGGTAGCAATCACAAATAGTCGAAGGCG  
>HPVFA75/KI88-03\_Unclassified\_206902429\_nt0841\_Genome\_Tile\_rc|1  
CATCAATACCTTTATGGTCCTTGTCCGCCATTGCGAATGACCTCTCGGCACTGAGGACAC  
>HPVFA75/KI88-03\_Unclassified\_206902429\_nt1121\_Genome\_Tile\_rc|1  
AGGGAGATTGACTCCAGCTGCGGACTGAGCTGCAGGATCTCTTCTCTTTAGGACTGAGG  
>HPVFA75/KI88-03\_Unclassified\_206902429\_nt1341\_Genome\_Tile\_rc|1  
ATCCTTAAATTTACTTAACAATGTTGCTTTTGCATTGCTGCACTTTAACAGCGCTTTATA  
>HPVFA75/KI88-03\_Unclassified\_206902429\_nt1361\_Genome\_Tile\_rc|1  
TTAAAACTCACTCCAAACGCATCCTTAAATTTACTTAACAATGTTGCTTTTGCATTGCTG  
>HPVFA75/KI88-03\_Unclassified\_206902429\_nt1381\_Genome\_Tile\_rc|1  
GATAGTGCTTGTGAGCTCATTA AAACTCACTCCAAACGCATCCTTAAATTTACTTAACA  
>HPVFA75/KI88-03\_Unclassified\_206902429\_nt1421\_Genome\_Tile\_rc|1  
ATACTAACAACCCGATCCCTACAACATGTCTTATTACTTTGATAGTGCTTGTGAGCTCA  
>HPVFA75/KI88-03\_Unclassified\_206902429\_nt1481\_Genome\_Tile\_rc|1  
GAACAATGCTTTTGTAAATAAATGCTTAGACCTTCTAACAGATCATCTTCACTGCATAA  
>HPVFA75/KI88-03\_Unclassified\_206902429\_nt1521\_Genome\_Tile\_rc|1  
AAATAATGACATTGGTTGTAAACATGCATCCAAATATATGAACAATGCTTTTGTAAATA  
>HPVFA75/KI88-03\_Unclassified\_206902429\_nt1621\_Genome\_Tile\_rc|1  
TAGGTGGTTCAGACAATGTTTGAATTTCACTTACTTGCAAAATAGAAGATAGTAATCTAA  
>HPVFA75/KI88-03\_Unclassified\_206902429\_nt1741\_Genome\_Tile\_rc|1  
AAGATTGATGGCTAATCATAGTTTGTGTCACTATCCAATCAGGATATGTTCCAAAAGTAT  
>HPVFA75/KI88-03\_Unclassified\_206902429\_nt1761\_Genome\_Tile\_rc|1  
AGAAAATTGCGTGGCCTCCAAAGATTGATGGCTAATCATAGTTTGTGTCACTATCCAATC  
>HPVFA75/KI88-03\_Unclassified\_206902429\_nt1781\_Genome\_Tile\_rc|1  
CACTGTATCATGTGAGATAAAGAAAATTGCGTGGCCTCCAAAGATTGATGGCTAATCATA  
>HPVFA75/KI88-03\_Unclassified\_206902429\_nt2121\_Genome\_Tile\_rc|1  
ATGAAATAAAATGCAATTCCTTTTAGGTGTATTCTGCAAAAATGTCTAAACTTATCTAA



>HPVFA75/KI88-03\_Unclassified\_206902429\_nt2141\_Genome\_Tile\_rc|1  
TTCCCTGAATCAGGAGGCCCATGAAATAAAATGCAATTCCTTTTAGGTGTATTCTGCAAA  
>HPVFA75/KI88-03\_Unclassified\_206902429\_nt2301\_Genome\_Tile\_rc|1  
TAAGAATGTATCAAAATAATTCCAACACTCATATGTAGCATCGTCTAGCAGTGCTATTTT  
>HPVFA75/KI88-03\_Unclassified\_206902429\_nt2341\_Genome\_Tile\_rc|1  
TTATATCTAGACTGACTGGGTTTCCATCAATGCCATTTCTTAAGAATGTATCAAAATAAT  
>HPVFA75/KI88-03\_Unclassified\_206902429\_nt2421\_Genome\_Tile\_rc|1  
ATATCTATCTTCTTTATTAATATCTATATTAGATGTTATCATTAAGGTGGAAATTGTAT  
>HPVFA75/KI88-03\_Unclassified\_206902429\_nt2441\_Genome\_Tile\_rc|1  
ATTCTACTTTTGCAAATACCTATATCTATCTTCTTTATTAATATCTATATTAGATGTTATC  
>HPVFA75/KI88-03\_Unclassified\_206902429\_nt2461\_Genome\_Tile\_rc|1  
TAGGAAATTCAAATGACATGATTCTACTTTGCAAATACCTATATCTATCTTCTTTATTAA  
>HPVFA75/KI88-03\_Unclassified\_206902429\_nt2481\_Genome\_Tile\_rc|1  
ACTATCAAAAGGAAATTTATTAGGAAATTCAAATGACATGATTCTACTTTGCAAATACCT  
>HPVFA75/KI88-03\_Unclassified\_206902429\_nt2761\_Genome\_Tile\_rc|1  
TACAGGTTGATATCCTAGGCGCATAACACCATTCCCTCCTTGCCATAATTTAAAAGCACCTG  
>HPVFA75/KI88-03\_Unclassified\_206902429\_nt2881\_Genome\_Tile\_rc|1  
AAGGCTAGTCTGCACCAAGTTCCACGGTTCATCAGCATACTCAGAAGTTGTAAACTTTG  
>HPVFA75/KI88-03\_Unclassified\_206902429\_nt3021\_Genome\_Tile\_rc|1  
CACTTATCATCTGAGTTTTGTATAATATATCCATGTCCATACAGTATAAATCATAAGATTT  
>HPVFA75/KI88-03\_Unclassified\_206902429\_nt3081\_Genome\_Tile\_rc|1  
TTATGTTTTCCCTCTGTATAGTAAGCACCCCTCATAGTCCACAGCACCTTCTACCTTTTGC  
>HPVFA75/KI88-03\_Unclassified\_206902429\_nt3101\_Genome\_Tile\_rc|1  
CAAATCTAAGGTAGTAGTGCTTATGTTTTCCCTCTGTATAGTAAGCACCCCTCATAGTCCA  
>HPVFA75/KI88-03\_Unclassified\_206902429\_nt3121\_Genome\_Tile\_rc|1  
AAATCTGTTAGCATCTGCTTCAAATCTAAGGTAGTAGTGCTTATGTTTTCCCTCTGTATA  
>HPVFA75/KI88-03\_Unclassified\_206902429\_nt3281\_Genome\_Tile\_rc|1  
CGTATCGTTTTTGTGTGGTGAGACGCTGGAAGAGGGCTGGAGGGATGTGGTGTGCGAGG  
>HPVFA75/KI88-03\_Unclassified\_206902429\_nt3401\_Genome\_Tile\_rc|1  
GTCTTGATCTTGATCTGACACGTTGTCTCGATGTCGCCTGCGTTCCTTCTCCGTCTCCTT  
>HPVFA75/KI88-03\_Unclassified\_206902429\_nt3481\_Genome\_Tile\_rc|1  
TTCTCTTCTCCCTCGTGACCCTCCTCCTCGCCCTTTCCCTCGTTTGACTGAGGTTTCTTG  
>HPVFA75/KI88-03\_Unclassified\_206902429\_nt3761\_Genome\_Tile\_rc|1  
CATATTTGTAGCCACCCTTATGCCTTTTATGCACCCTGTAGCGATAGCATTTAAGCTGAT  
>HPVFA75/KI88-03\_Unclassified\_206902429\_nt3821\_Genome\_Tile\_rc|1  
TCCGAGCGCGTCCCCTCTGTTCATTGTTATGTTCTGTGATCCATGACCAAGTACTACTGA  
>HPVFA75/KI88-03\_Unclassified\_206902429\_nt3841\_Genome\_Tile\_rc|1  
TGATGAAAACAGAACAAGCATCCGAGCGCGTCCCCTCTGTTCATTGTTATGTTCTGTGAT  
>HPVFA75/KI88-03\_Unclassified\_206902429\_nt3861\_Genome\_Tile\_rc|1  
AATGCTTCCCTTTGTTCTGTTGATGAAAACAGAACAAGCATCCGAGCGCGTCCCCTCTG  
>HPVFA75/KI88-03\_Unclassified\_206902429\_nt3881\_Genome\_Tile\_rc|1  
GTAATTTTCATAGTGTCTAGAAATGCTTCCCTTTGTTCTGTTGATGAAAACAGAACAAGCA  
>HPVFA75/KI88-03\_Unclassified\_206902429\_nt3941\_Genome\_Tile\_rc|1  
AAAAAGGGTTAGTTAATTAATAAATTATCAAGATTCCCATAGGACCAATCAACACCCTGAG  
>HPVFA75/KI88-03\_Unclassified\_206902429\_nt3961\_Genome\_Tile\_rc|1  
TGTAAGGATGCAATTAGTAAAAAGGGTAGTTAATTAATAAATTATCAAGATTCCCAT  
>HPVFA75/KI88-03\_Unclassified\_206902429\_nt3981\_Genome\_Tile\_rc|1  
TTAGCAGATTAGTATATTAGTGTAAGCATGCAATTAGTAAAAAGGGTTAGTTAATTAA  
>HPVFA75/KI88-03\_Unclassified\_206902429\_nt4621\_Genome\_Tile\_rc|1  
TTTCAAACACCAATATATGATCTGATAATGAAGACTCCCAGCTATTGGTGTAGACTCAG  
>HPVFA75/KI88-03\_Unclassified\_206902429\_nt4641\_Genome\_Tile\_rc|1  
TATAGCTTGACCCCCTGTGTTTTCAAACACCAATATATGATCTGATAATGAAGACTCCCC  
>HPVFA75/KI88-03\_Unclassified\_206902429\_nt4661\_Genome\_Tile\_rc|1  
ATTTCTTCTCTTGTACCACCTATAGCTTGACCCCCTGTGTTTTCAAACACCAATATATGA  
>HPVFA75/KI88-03\_Unclassified\_206902429\_nt4681\_Genome\_Tile\_rc|1

AAGGTAATGATTGTAGTTCAATTTCTTCTCTTGTACCACCTATAGCTTGACCCCCTGTGT  
>HPVFA75/KI88-03\_Unclassified\_206902429\_nt4721\_Genome\_Tile\_rc|1  
CGAGTAGGAGTGGCCTCTTCTATTTCAAAGCTATACCTGGAAGGTAATGATTGTAGTTCA  
>HPVFA75/KI88-03\_Unclassified\_206902429\_nt4801\_Genome\_Tile\_rc|1  
GAGTTAATCTTCGATTGTACAAGGCCCTACGTAAAGCAGAAACAGCTTGCCTACCTCTTT  
>HPVFA75/KI88-03\_Unclassified\_206902429\_nt4841\_Genome\_Tile\_rc|1  
GGTTTGGATAAAAAATAAGGGTCTTCTACAGCTATCTGTTGAGTTAATCTTCGATTGTAC  
>HPVFA75/KI88-03\_Unclassified\_206902429\_nt5041\_Genome\_Tile\_rc|1  
TTAGGGAAGCGCGTCGCCCTAGCCTACTTACCCTAACATAGCCTTGAGGAGTTTCAGAAT  
>HPVFA75/KI88-03\_Unclassified\_206902429\_nt5061\_Genome\_Tile\_rc|1  
CTGAGTACCACTCCTAGTCCTTAGGGAAGCGCGTCGCCCTAGCCTACTTACCCTAACATA  
>HPVFA75/KI88-03\_Unclassified\_206902429\_nt5081\_Genome\_Tile\_rc|1  
AAATGAACCTGTGCACCAACCTGAGTACCACTCCTAGTCCTTAGGGAAGCGCGTCGCCCT  
>HPVFA75/KI88-03\_Unclassified\_206902429\_nt5141\_Genome\_Tile\_rc|1  
TCTCCTAAAAGTTGTAATTCTATGGGCTCCTCAGTGTTAATTGTACTAAGGTCCCTGTAG  
>HPVFA75/KI88-03\_Unclassified\_206902429\_nt5221\_Genome\_Tile\_rc|1  
GGCTAGGTGTTTCATTAATATTAACATCTATAAGTGTACTTTCAACAGGCCCTTGTAACA  
>HPVFA75/KI88-03\_Unclassified\_206902429\_nt5241\_Genome\_Tile\_rc|1  
AAATCTGAAGTTTCCAAAAGGCTAGGTGTTTCATTAATATTAACATCTATAAGTGTACT  
>HPVFA75/KI88-03\_Unclassified\_206902429\_nt5261\_Genome\_Tile\_rc|1  
AGTAATAAATCTTCAGAATTAAATTCTGAAGTTTCCAAAAGGCTAGGTGTTTCATTAATA  
>HPVFA75/KI88-03\_Unclassified\_206902429\_nt5361\_Genome\_Tile\_rc|1  
CCTAGGAGAACTGAATCTAGGTACAGTAACAGATGAAGTTGACCTCCTAGATGTACCAA  
>HPVFA75/KI88-03\_Unclassified\_206902429\_nt5381\_Genome\_Tile\_rc|1  
TGAATATATAAACTTGTTTCCCTAGGAGAACTGAATCTAGGTACAGTAACAGATGAAGTT  
>HPVFA75/KI88-03\_Unclassified\_206902429\_nt5401\_Genome\_Tile\_rc|1  
CATTATAACCTTCAATATCTTGAATATATAAACTTGTTTCCCTAGGAGAACTGAATCTAG  
>HPVFA75/KI88-03\_Unclassified\_206902429\_nt6141\_Genome\_Tile\_rc|1  
ACAGAATTTTTTCAGTTCTATAGGTGGACATTTTCCCTGTTGATCTCCTGCATTTTACAT  
>HPVFA75/KI88-03\_Unclassified\_206902429\_nt6241\_Genome\_Tile\_rc|1  
TTCGTCTACTAAATCTAAGCTAACATCTGATCTATTTCAGGGATAGAGTTTAAATTTAT  
>HPVFA75/KI88-03\_Unclassified\_206902429\_nt6401\_Genome\_Tile\_rc|1  
TATGATCTTGATTATTTGCTCCATCTGGAGTAGCGTCTCCAACATTACCTCCTCTGGTAA  
>HPVFA75/KI88-03\_Unclassified\_206902429\_nt6421\_Genome\_Tile\_rc|1  
CTTAGGAGGTAAATAAAATTTATGATCTTGATTATTTGCTCCATCTGGAGTAGCGTCTCC  
>HPVFA75/KI88-03\_Unclassified\_206902429\_nt6441\_Genome\_Tile\_rc|1  
AGTGTGTTGACTTTGTGATGACTTAGGAGGTAAATAAAATTTATGATCTTGATTATTTGCT  
>HPVFA75/KI88-03\_Unclassified\_206902429\_nt6461\_Genome\_Tile\_rc|1  
GAAAGTAAATTTGAATTTCTAGTGTTTGACTTTGTGATGACTTAGGAGGTAAATAAAATT  
>HPVFA75/KI88-03\_Unclassified\_206902429\_nt6481\_Genome\_Tile\_rc|1  
TAGAGAACCCTAACAGTAGGAAAGTAAATTGAATTTCTAGTGTTTGACTTTGTGATGA  
>HPVFA75/KI88-03\_Unclassified\_206902429\_nt6641\_Genome\_Tile\_rc|1  
TAGCACCATTATCTGAAGGTACACAAATGGTAAAGTTAGTGTTTCTAGTGTTATCAGCAA  
>HPVFA75/KI88-03\_Unclassified\_206902429\_nt6661\_Genome\_Tile\_rc|1  
GCTAGAATCATACTCAGTTATAGCACCATTATCTGAAGGTACACAAATGGTAAAGTTAGT  
>HPVFA75/KI88-03\_Unclassified\_206902429\_nt6681\_Genome\_Tile\_rc|1  
CTTAAAAATCTCTAAATTTGCTAGAATCATACTCAGTTATAGCACCATTATCTGAAGGT  
>HPVFA75/KI88-03\_Unclassified\_206902429\_nt6701\_Genome\_Tile\_rc|1  
TTTGATACTCTCCACGTGCCTTAAAAATCTCTAAATTTGCTAGAATCATACTCAGTTA  
>HPVFA75/KI88-03\_Unclassified\_206902429\_nt6761\_Genome\_Tile\_rc|1  
TGATCTGGGCTAGCACATCAGGTTGCAGTGATACTTTACACAGTTGTAATATTACAGATA  
>HPVFA75/KI88-03\_Unclassified\_206902429\_nt6861\_Genome\_Tile\_rc|1  
GCTGAGGAATTTATAAATCTATAGGTGTCATGTACTGCATTGTCAGGAGTTGGTACAAAT  
>HPVFA75/KI88-03\_Unclassified\_206902429\_nt6881\_Genome\_Tile\_rc|1  
CCTTATCTGGACATTTAGTGGCTGAGGAATTTATAAATCTATAGGTGTCATGTACTGCAT

>HPVFA75/KI88-03\_Unclassified\_206902429\_nt6901\_Genome\_Tile\_rc|1  
CTCTCTATCTTTTGCAGGAACCTTATCTGGACATTTAGTGGCTGAGGAATTTATAAATCT  
>HPVFA75/KI88-03\_Unclassified\_206902429\_nt7021\_Genome\_Tile\_rc|1  
CCTGGTGTCTGTAACTCTGCTTGAACAAAACTTTCTTCTAAAGGATATTGATCTAA  
>HPVFA75/KI88-03\_Unclassified\_206902429\_nt7041\_Genome\_Tile\_rc|1  
CTACGCTTTAATGATTTGACCCTGGTGTCTGTAACTCTGCTTGAACAAAACTTTCTT  
>HPVFA75/KI88-03\_Unclassified\_206902429\_nt7081\_Genome\_Tile\_rc|1  
TGTCCGTCGTCGTTTTGCAGTACCCCGAGAAACAGATCTGCTACGCTTTAATGATTTGAC  
>HPVFA75/KI88-03\_Unclassified\_206902429\_nt7261\_Genome\_Tile\_rc|1  
GACAGACTGCCAAGTCTTTGTAAGGTGAAGTACCGGCTGCGATTTATAAGCAGATTATAC  
>HPV9\_Beta\_9627396\_nt0141\_Genome\_Tile\_rc|1  
TGGCACCTTATATATTTATGTCTATATAAGCTTATTAACGAAGGCGGTCATATGAAAATG  
>HPV9\_Beta\_9627396\_nt0161\_Genome\_Tile\_rc|1  
AATCTGCTCTGTAAATACATGGCACCTTATATATTTATGTCTATATAAGCTTATTAACG  
>HPV9\_Beta\_9627396\_nt0181\_Genome\_Tile\_rc|1  
CTAGGTTTTGGCCTGTCCATAATCTGCTCTGTAAATACATGGCACCTTATATATTTATG  
>HPV9\_Beta\_9627396\_nt0261\_Genome\_Tile\_rc|1  
AAAATCTATTGCAAAATTTACAAGGTATCAACAAATCTATTAAAGGAATCACAAGAGTGT  
>HPV9\_Beta\_9627396\_nt0281\_Genome\_Tile\_rc|1  
AAGTAGCTCAAAAATAAGATAAAAATCTATTGCAAAATTTACAAGGTATCAACAAATCTAT  
>HPV9\_Beta\_9627396\_nt0301\_Genome\_Tile\_rc|1  
AAACACTTGTGATCAAAATTAAGTAGCTCAAAATAAGATAAAAATCTATTGCAAAATTTA  
>HPV9\_Beta\_9627396\_nt0321\_Genome\_Tile\_rc|1  
CCTCTGTCCAAATAAGCTGTAAACACTTGTGATCAAAATTAAGTAGCTCAAAATAAGATA  
>HPV9\_Beta\_9627396\_nt0341\_Genome\_Tile\_rc|1  
GAGTCCATACACCAAATCCTCCTCTGTCCAAATAAGCTGTAAACACTTGTGATCAAAATT  
>HPV9\_Beta\_9627396\_nt0401\_Genome\_Tile\_rc|1  
AGCAAATTGAAAAAATGTGTAAATTCTAACTGTGCAGACGCATAAGCACAGCTACTACA  
>HPV9\_Beta\_9627396\_nt0421\_Genome\_Tile\_rc|1  
TCTATATCTTTTCCAACCTACAGCAAATTGAAAAAATGTGTAAATTCTAACTGTGCAGAC  
>HPV9\_Beta\_9627396\_nt0441\_Genome\_Tile\_rc|1  
TAGCTGTTTCTTCTACAGTTTCTATATCTTTTCCAACCTACAGCAAATTGAAAAAATGTG  
>HPV9\_Beta\_9627396\_nt0481\_Genome\_Tile\_rc|1  
AACTTAAACAGTAGCGACACCTAATACAAATATTTCCAATAGCTGTTTCTTCTACAGTT  
>HPV9\_Beta\_9627396\_nt0521\_Genome\_Tile\_rc|1  
AAACTTATAGCATGTAGCTAACTTCTCCACTAAGTCTAATAACTTAAACAGTAGCGACA  
>HPV9\_Beta\_9627396\_nt0541\_Genome\_Tile\_rc|1  
CTGACCTTATAAACTGCTCAAACCTTATAGCATGTAGCTAACTTCTCCACTAAGTCTAAT  
>HPV9\_Beta\_9627396\_nt0761\_Genome\_Tile\_rc|1  
ATAAACGAAGTCTTGCACCGCAACCACAGCCAGCTACGATCTTGTAGGGAGTGAGACACT  
>HPV9\_Beta\_9627396\_nt0781\_Genome\_Tile\_rc|1  
TAAATTTGTAGCAAGCACGTATAAACGAAGTCTTGCACCGCAACCACAGCCAGCTACGAT  
>HPV9\_Beta\_9627396\_nt0821\_Genome\_Tile\_rc|1  
GTATATCACCCAGCAAAAGTTTCTGTTGCGCTCGAATTCCTAAATTTGTAGCAAGCACGT  
>HPV9\_Beta\_9627396\_nt1661\_Genome\_Tile\_rc|1  
TCGCAACTTTGGAGGCTCACTTAATAATTGCACTTCAGATACTTGCAGCAAAGTGCTTAA  
>HPV9\_Beta\_9627396\_nt1881\_Genome\_Tile\_rc|1  
CTGTTTCAGCCAGCTTTGCATATTGATATGCAATGGTAGCTTCATCAAAATATTCATGAT  
>HPV9\_Beta\_9627396\_nt2061\_Genome\_Tile\_rc|1  
TAAACCGTACTATATCTGACCATTGCCATTGCTTTTCCACTGTAAGCAGTTTTCTATGTA  
>HPV9\_Beta\_9627396\_nt2121\_Genome\_Tile\_rc|1  
TTTGCAGAAATGCTTTAAATACTGTTAGAAATTCATAAAATTAATATCCTGGTATCTAA  
>HPV9\_Beta\_9627396\_nt2281\_Genome\_Tile\_rc|1  
GCAAGTTTAGTATCAGCTATAGTTGTAGCCAAAAAGTACTTTTGCAATTGGCAAATGAC  
>HPV9\_Beta\_9627396\_nt2461\_Genome\_Tile\_rc|1

AAATATTTGTACTTTTGGTCTTTAGTAATATCTATGTTAGACGTTAACATAAGGGGTGGA  
>HPV9\_Beta\_9627396\_nt2501\_Genome\_Tile\_rc|1  
AAATTTGTTATTGAAAGCAAAGGATTTAACTCTGCTGTGCAAATATTTGTACTTTTGGTC  
>HPV9\_Beta\_9627396\_nt2521\_Genome\_Tile\_rc|1  
TTGTGATTAGCATCAAGTGGAAATTTGTTATTGAAAGCAAAGGATTTAACTCTGCTGTGC  
>HPV9\_Beta\_9627396\_nt3121\_Genome\_Tile\_rc|1  
AATATGTTTTTACAGTCCCTTCAAAGTAATAGGCTCCAAAATAATCCACGTGACCTTGAA  
>HPV9\_Beta\_9627396\_nt3141\_Genome\_Tile\_rc|1  
ATCTTTGTCAAAGTTAATATAATATGTTTTTACAGTCCCTTCAAAGTAATAGGCTCCAAA  
>HPV9\_Beta\_9627396\_nt3161\_Genome\_Tile\_rc|1  
GTTCTGCCATACCTGGCTGCATCTTTGTCAAAGTTAATATAATATGTTTTTACAGTCCCT  
>HPV9\_Beta\_9627396\_nt3301\_Genome\_Tile\_rc|1  
CAGGGAGTCGCGATGTTGTTGGCGACCCCGACCTGGAAAGGGTGTGCTTGGAGGTCTCTC  
>HPV9\_Beta\_9627396\_nt3441\_Genome\_Tile\_rc|1  
CCTGTAGTTGGTTTCTTCTCCTTCTCCTTCTCCTTCTCCTTCTCCTTGTCTCTGTCTTTT  
>HPV9\_Beta\_9627396\_nt3481\_Genome\_Tile\_rc|1  
TTTCGGTTTCTGTTTCGACCCTTGGATCTGGACCTTTGTCTCCTGTAGTTGGTTTCTTCTC  
>HPV9\_Beta\_9627396\_nt3921\_Genome\_Tile\_rc|1  
ATATGTGTCAAAGGCTAAAATCATTCGCGCTCTTCCAACCTATCACAACGTCTTCCCC  
>HPV9\_Beta\_9627396\_nt3941\_Genome\_Tile\_rc|1  
ATGAATTGTTGTCTGTGCTCATATGTGTCAAAGGCTAAAATCATTCGCGCTCTTCCAAC  
>HPV9\_Beta\_9627396\_nt3961\_Genome\_Tile\_rc|1  
GTGGTAATTTTCATAGTCCTAATGAATTGTTGTCTGTGCTCATATGTGTCAAAGGCTAAAA  
>HPV9\_Beta\_9627396\_nt3981\_Genome\_Tile\_rc|1  
TAAAGACCAATCTACTGTAGGTGGTAATTTTCATAGTCCTAATGAATTGTTGTCTGTGCTC  
>HPV9\_Beta\_9627396\_nt4021\_Genome\_Tile\_rc|1  
GCGTTAGCGTTAGTAAAGCTTACAGATCATCAACATTTCTTAAAGACCAATCTACTGTAG  
>HPV9\_Beta\_9627396\_nt4041\_Genome\_Tile\_rc|1  
ATGGGTTAGTAGCAATGCCAGCGTTAGCGTTAGTAAAGCTTACAGATCATCAACATTTCC  
>HPV9\_Beta\_9627396\_nt4061\_Genome\_Tile\_rc|1  
GTATGGGTTTGTAGTTAGTATGGGTTAGTAGCAATGCCAGCGTTAGCGTTAGTAAAGCT  
>HPV9\_Beta\_9627396\_nt4541\_Genome\_Tile\_rc|1  
TTCTACCTTCTGTTACAACCTGGAGTATCTACTACAGCATTGTCCACTGGTACTGGGTGTA  
>HPV9\_Beta\_9627396\_nt4561\_Genome\_Tile\_rc|1  
TAAAATGGCAGACGAGCCTCTTCTACCTTCTGTTACAACCTGGAGTATCTACTACAGCATT  
>HPV9\_Beta\_9627396\_nt4721\_Genome\_Tile\_rc|1  
CTACTAGCTGGCCCCCAGATCCTTCAAAAACCTATAATATGATCTGCTAAGGAAGATTAC  
>HPV9\_Beta\_9627396\_nt4741\_Genome\_Tile\_rc|1  
GTATGATTCCCTAGGACCACCTACTAGCTGGCCCCCAGATCCTTCAAAAACCTATAATATG  
>HPV9\_Beta\_9627396\_nt4761\_Genome\_Tile\_rc|1  
ATGTTTTTCAGAAGATGCTGTGTATGATTCCCTAGGACCACCTACTAGCTGGCCCCCAGAT  
>HPV9\_Beta\_9627396\_nt4781\_Genome\_Tile\_rc|1  
TAGGAAATCTTGTAAATCTATGTTTTTCAGAAGATGCTGTGTATGATTCCCTAGGACCAC  
>HPV9\_Beta\_9627396\_nt4881\_Genome\_Tile\_rc|1  
TATAGAGCTCTACGCAGACTAGATAATGATTGTACTGCTCTTTGGACAGGTGTACTAGTC  
>HPV9\_Beta\_9627396\_nt4901\_Genome\_Tile\_rc|1  
GTTCTGTAAGACGCTCTGTTATATAGAGCTCTACGCAGACTAGATAATGATTGTACTGCTC  
>HPV9\_Beta\_9627396\_nt5181\_Genome\_Tile\_rc|1  
TAGAAATGAACCTGTGCGCCACCTGTGCACCACTACGTGTGCGGATTGTTGCTCTTCGG  
>HPV9\_Beta\_9627396\_nt5381\_Genome\_Tile\_rc|1  
GTAAGTCTTCAGAATTAAAATCCACATCTTCAACAGAAGGGGTTTCTGTCTTCCCACCT  
>HPV9\_Beta\_9627396\_nt5401\_Genome\_Tile\_rc|1  
TTCTACACCTCATCTAACAGTAAGTCTTCAGAATTAAAATCCACATCTTCAACAGAAGG  
>HPV9\_Beta\_9627396\_nt5421\_Genome\_Tile\_rc|1  
AGCTGAGACCCACTAAAATCTTCTACACCTCATCTAACAGTAAGTCTTCAGAATTAAAA

>HPV9\_Beta\_9627396\_nt5541\_Genome\_Tile\_rc|1  
CTAGACTCGGGATAGGACACTGTGTAGCCTTGTATATCCTGAATATAAAAACTAGTGTCC  
>HPV9\_Beta\_9627396\_nt5561\_Genome\_Tile\_rc|1  
AAATTATATCTGTGGTTTGTCTAGACTCGGGATAGGACACTGTGTAGCCTTGTATATCCT  
>HPV9\_Beta\_9627396\_nt5601\_Genome\_Tile\_rc|1  
TTGATGTGGATTACTACTGTGGGGGTGTCAGGATGTGGAAAAATTATATCTGTGGTTTGT  
>HPV9\_Beta\_9627396\_nt5641\_Genome\_Tile\_rc|1  
TTGGAGACTTGGGTGTAAATAATAATCTCCTGATGTATCATTGATGTGGATTACTACTGT  
>HPV9\_Beta\_9627396\_nt5861\_Genome\_Tile\_rc|1  
TGTCCGTCGCTGAGCGGACATCATAATATGGATGACCCACTGTTAGCAAACGGTCACTA  
>HPV9\_Beta\_9627396\_nt5901\_Genome\_Tile\_rc|1  
CCGATACTGATTACCAGACACTTTAGGGACTTCAATCCTTTGTCCGTCGCTGAGCGGAC  
>HPV9\_Beta\_9627396\_nt6241\_Genome\_Tile\_rc|1  
ATAAGCCTAGTTGATTATTAGCATCCTTTTCACACACTTTGGCTTTATCCCAGTGTTCTC  
>HPV9\_Beta\_9627396\_nt6261\_Genome\_Tile\_rc|1  
TCTTAATTCTATAGGAGGACATAAGCCTAGTTGATTATTAGCATCCTTTTCACACACTTT  
>HPV9\_Beta\_9627396\_nt6541\_Genome\_Tile\_rc|1  
GCAAAAAGAAATTATGATCCTGGTTTACTGCACCATCAGGAACAGCGTCACCAACTGAAC  
>HPV9\_Beta\_9627396\_nt6601\_Genome\_Tile\_rc|1  
TTACTGTAGGATAGTAGGTGGAATTAGCTATTGTTTCGTTGTTGTTGATCACTTTTTTGCTG  
>HPV9\_Beta\_9627396\_nt6621\_Genome\_Tile\_rc|1  
TGAAGTTACTAATGACCCACTTACTGTAGGATAGTAGGTGGAATTAGCTATTGTTTCGTTG  
>HPV9\_Beta\_9627396\_nt6781\_Genome\_Tile\_rc|1  
ATTCTTCTGTTTGTAGCTGCCTCTGTAGACACACTAATGGTAAAATTGGTGTTACGTGTAT  
>HPV9\_Beta\_9627396\_nt6801\_Genome\_Tile\_rc|1  
TCTAATATTATTGGCATTATATTCTTCTGTTTGTAGCTGCCTCTGTAGACACACTAATGGT  
>HPV9\_Beta\_9627396\_nt7021\_Genome\_Tile\_rc|1  
TAGGCTCAACAGCATCTGGGCATTTTGTGGCTTTTGAATCAATATATCTGTAGATATCAT  
>HPV9\_Beta\_9627396\_nt7181\_Genome\_Tile\_rc|1  
GATGTTTTTAACAGATGTTTTAATAGGACGTTTTTCGTGTTTGCAAACCAGCTTGAAAAAGA  
>HPV9\_Beta\_9627396\_nt7201\_Genome\_Tile\_rc|1  
GCCTTCTCTTAGCATTTTTTAGATGTTTTAACAGATGTTTTAATAGGACGTTTTTCGTGTTT  
>HPV9\_Beta\_9627396\_nt7241\_Genome\_Tile\_rc|1  
ATAACTTAAATTTTATTGGAAACCGATATCGGTTAGGTTTCGCTTCTCTTAGCATTTTTTA  
>HPV111\_Beta\_186461202\_nt0201\_Genome\_Tile\_rc|1  
AGATAAGAATCTATTGCAAAAGTTGCATGGTAATAATAAATCTATTACAGGAATTGCTAG  
>HPV111\_Beta\_186461202\_nt0221\_Genome\_Tile\_rc|1  
AAACTCAGCAACTCAAAGTAAGATAAGAATCTATTGCAAAAGTTGCATGGTAATAATAAA  
>HPV111\_Beta\_186461202\_nt0241\_Genome\_Tile\_rc|1  
GTTGCAAAATACTTATAATCAAACCTCAGCAACTCAAAGTAAGATAAGAATCTATTGCAAA  
>HPV111\_Beta\_186461202\_nt0261\_Genome\_Tile\_rc|1  
GTCTTCAACAGTCCATATCAGTTGCAAACTTATAATCAAACCTCAGCAACTCAAAGTA  
>HPV111\_Beta\_186461202\_nt0281\_Genome\_Tile\_rc|1  
CTACATATAGCATATACTAAGTCTTCAACAGTCCATATCAGTTGCAAACTTATAATCA  
>HPV111\_Beta\_186461202\_nt0341\_Genome\_Tile\_rc|1  
ACAACAGAGTATTCAAATATTTTATAAATCAAACCTGTGCTGAAGCAAAAGCACAACTA  
>HPV111\_Beta\_186461202\_nt0361\_Genome\_Tile\_rc|1  
CAGTTTCTATCTGTTTTCTTACAACAGAGTATTCAAATATTTTATAAATCAAACCTGTG  
>HPV111\_Beta\_186461202\_nt0381\_Genome\_Tile\_rc|1  
TCCAATAGGCTGGTTTGTCTACAGTTTCTATCTGTTTTCTTACAACAGAGTATTCAAATA  
>HPV111\_Beta\_186461202\_nt0421\_Genome\_Tile\_rc|1  
CCAATTTTTTCAAACAATATTGACACCTAACAGTAATATTTCCAATAGGCTGGTTTGTCTA  
>HPV111\_Beta\_186461202\_nt0441\_Genome\_Tile\_rc|1  
TCCTAGCTTCTCTACCAGATCCAATTTTTTCAAACAATATTGACACCTAACAGTAATATT  
>HPV111\_Beta\_186461202\_nt0461\_Genome\_Tile\_rc|1

TATTGTTGTTTGTAGCACACTCCTAGCTTCTCTACCAGATCCAATTTTTTCAAACAATAT  
>HPV111\_Beta\_186461202\_nt0501\_Genome\_Tile\_rc|1  
TCTGCACAATCCTTTCCAATTATCCCTAACTCTATGAAAATATTGTTGTTGTAGCACAC  
>HPV111\_Beta\_186461202\_nt0701\_Genome\_Tile\_rc|1  
AAAGACGTATAAGCGAAGTCTTGTACCACAATTGCAAGCAACTACAATTTTGTAAAGGAGT  
>HPV111\_Beta\_186461202\_nt0741\_Genome\_Tile\_rc|1  
GTAATAGTTCTTGTGGGCTCTTATTCCAAGTTCCGTAGCAAAGACGTATAAGCGAAGTC  
>HPV111\_Beta\_186461202\_nt0761\_Genome\_Tile\_rc|1  
CACAAGCTGTACTTCACCCAGTAATAGTTCTTGTGGGCTCTTATTCCAAGTTCCGTAGC  
>HPV111\_Beta\_186461202\_nt1301\_Genome\_Tile\_rc|1  
AATTTAGCCAGTAACACAGCTTTCACATTATTAGATTTAAGTAATCTTTTACAATCTCC  
>HPV111\_Beta\_186461202\_nt1421\_Genome\_Tile\_rc|1  
GAACCTTCTACAAGATCGCCATTAGCTGCATAAATACTAATTACCCAATCTCTACAACAT  
>HPV111\_Beta\_186461202\_nt1441\_Genome\_Tile\_rc|1  
GCTGTATCAACAATTGCTTAGAACCTTCTACAAGATCGCCATTAGCTGCATAAATACTAA  
>HPV111\_Beta\_186461202\_nt1581\_Genome\_Tile\_rc|1  
ATCTGCCAATACCTGCACTTCTGATACTGTAAATATTGTGCTTAATAATCGTAGTACAGT  
>HPV111\_Beta\_186461202\_nt1601\_Genome\_Tile\_rc|1  
ACGCTGCGCAATTTAGGAGGATCTGCCAATACCTGCACTTCTGATACTTGTAAATATTGTG  
>HPV111\_Beta\_186461202\_nt1701\_Genome\_Tile\_rc|1  
ATGATTGATCATTGTTTGTGCTAATATCCAATCTGGGTATGTACCGTGAGCATACACATT  
>HPV111\_Beta\_186461202\_nt1921\_Genome\_Tile\_rc|1  
TCATCTCTCGCATCTCCCCTCGAATATAATGTCTTACCATAGTAGCACATTCCCTGACAA  
>HPV111\_Beta\_186461202\_nt2061\_Genome\_Tile\_rc|1  
CCTATTATGTAAAACTTAGTAAATACAGAAAAGAAATCTATAAAATTTATTCCTTGATA  
>HPV111\_Beta\_186461202\_nt2101\_Genome\_Tile\_rc|1  
TATCTGGTGGTCCATGAAGCAATATGCAGTTTTGTCTAGGCCTATTATGTAAAACTTAG  
>HPV111\_Beta\_186461202\_nt2161\_Genome\_Tile\_rc|1  
AAGAGAGCACTTTACCTTTAAGAACATTAATGAGAGACATGGTAAACATAGATTTACCAG  
>HPV111\_Beta\_186461202\_nt2181\_Genome\_Tile\_rc|1  
AGTACTTCTACAATTTGCAAAAGAGAGCACTTTACCTTTAAGAACATTAATGAGAGACAT  
>HPV111\_Beta\_186461202\_nt2301\_Genome\_Tile\_rc|1  
TAAACAGACAACATTGCCATCTAATCCATTACGCAAATAATTATCAATATAATCCCAACA  
>HPV111\_Beta\_186461202\_nt2361\_Genome\_Tile\_rc|1  
GTTTGATGTTAATAATAGTGGGGGAAATTTTACTTGACAAGGTGCTCTATGTTTTATGTC  
>HPV111\_Beta\_186461202\_nt2381\_Genome\_Tile\_rc|1  
TGCTCCTTGGATATATCTATGTTTGATGTTAATAATAGTGGGGGAAATTTTACTTGACAA  
>HPV111\_Beta\_186461202\_nt2441\_Genome\_Tile\_rc|1  
AAGGGGAACCTTGTTAGTAAAAGCAAAGCATTTAATTCTGCTATGTAAATATTTATGCTTC  
>HPV111\_Beta\_186461202\_nt2701\_Genome\_Tile\_rc|1  
ACTCCATTTTTTCGAGCAAAGTACAATAAACTTGCTCTTGTCTCAATGCTTGCCAATGT  
>HPV111\_Beta\_186461202\_nt2961\_Genome\_Tile\_rc|1  
ATATATCTTCCATACTGTATAGCTCATTAGATTCTCTGGATCGCCATCAAAGATTACTT  
>HPV111\_Beta\_186461202\_nt2981\_Genome\_Tile\_rc|1  
GTCAGTCACAGTTTGATAATATATATCTTCCATACTGTATAGCTCATTAGATTCTCTGG  
>HPV111\_Beta\_186461202\_nt3061\_Genome\_Tile\_rc|1  
TCAATATAATAAGTTTTCAAAGCCCCTTCAAAATAAAAGGCTCCGAAATAATCCACTTGG  
>HPV111\_Beta\_186461202\_nt3221\_Genome\_Tile\_rc|1  
TGGTGATTGCGGCCTGGATGAGGTGTTGCCGGAGGCCTCTCCACTGGCCCCGTCTCCAGG  
>HPV111\_Beta\_186461202\_nt3361\_Genome\_Tile\_rc|1  
CTTGATTTCCTTGTAATGGCTTTTTGTCTTTTCTTTGTCTTTCTTGCCGCGTGGTGGTG  
>HPV111\_Beta\_186461202\_nt3841\_Genome\_Tile\_rc|1  
ATAAACTGTTCTCGATGTTTGTATGTATCAAAAGCTAAAAGCATTCTAGATCTGCCTACT  
>HPV111\_Beta\_186461202\_nt3861\_Genome\_Tile\_rc|1  
GTGGTAATTTTCATAGTAGTGATAAACTGTTCTCGATGTTTGTATGTATCAAAAGCTAAAA

>HPV111\_Beta\_186461202\_nt3921\_Genome\_Tile\_rc|1  
GCATAAGTTAGTAAGTAAATTATAAATCATCTAAATGTCCAAATGACCAGTCTACCTTAG  
>HPV111\_Beta\_186461202\_nt3961\_Genome\_Tile\_rc|1  
TTTTGCCCTAGCCATTATTTGTTAGTGTGTTAGTAGCAATGCATAAGTTAGTAAGTAAAT  
>HPV111\_Beta\_186461202\_nt4281\_Genome\_Tile\_rc|1  
GGGTCAATGGGTCTGACTGTGTCTATAGGTATTAAGTCTGCAGGGCCTATTACCTCTGGA  
>HPV111\_Beta\_186461202\_nt4621\_Genome\_Tile\_rc|1  
AACTATGGAGGGTTCTCGAGCACCTCCAACCAACTGTCCTCCAGAGCCTTCAAACACAAT  
>HPV111\_Beta\_186461202\_nt4641\_Genome\_Tile\_rc|1  
TGCAGTTCTATAGTTTCAGTAACTATGGAGGGTTCTCGAGCACCTCCAACCAACTGTCCT  
>HPV111\_Beta\_186461202\_nt4661\_Genome\_Tile\_rc|1  
TGTATCTAGAAGGTAATTCTTGAGTTCTATAGTTTCAGTAACTATGGAGGGTTCTCGAG  
>HPV111\_Beta\_186461202\_nt4781\_Genome\_Tile\_rc|1  
CAGCTACCTGCTCTGTCAAACGTCTATTGTACAGTGCTCTTCTTAAAGTACTAAGTGATT  
>HPV111\_Beta\_186461202\_nt4801\_Genome\_Tile\_rc|1  
TAAGAATAAAGGGTCAGTTACAGCTACCTGCTCTGTCAAACGTCTATTGTACAGTGCTCT  
>HPV111\_Beta\_186461202\_nt4821\_Genome\_Tile\_rc|1  
ACAAGACGTGAAGGTTTTGTTAAGAATAAAGGGTCAGTTACAGCTACCTGCTCTGTCAAA  
>HPV111\_Beta\_186461202\_nt4841\_Genome\_Tile\_rc|1  
GATTATCAAACGTGAAAGTGTACAAGACGTGAAGGTTTTGTTAAGAATAAAGGGTCAGTTA  
>HPV111\_Beta\_186461202\_nt5121\_Genome\_Tile\_rc|1  
TCTCCAGAATGTTACCTAATAATTCCATTTCTATTGGTGCTTCAGTGTTAATGCTACTT  
>HPV111\_Beta\_186461202\_nt5161\_Genome\_Tile\_rc|1  
TACTAAAGAACTCTCTACTGGTCCTTGAAAAATAGTGCTATCTCCAGAATGTTACCTAA  
>HPV111\_Beta\_186461202\_nt5181\_Genome\_Tile\_rc|1  
GGTTCATCAATATTAACATCTACTAAAGAACTCTCTACTGGTCCTTGAAAAATAGTGCTA  
>HPV111\_Beta\_186461202\_nt5241\_Genome\_Tile\_rc|1  
TTAAAATCTATTTTCATCTTCTAATGGAGGGGTTTCCGGTCTGCCTACAACCAAGGCGTCA  
>HPV111\_Beta\_186461202\_nt5281\_Genome\_Tile\_rc|1  
AAAATCTTCTACCCCTTCCTCCAATAACAAATCTTCTGAATTAAAATCTATTTTCATCTTC  
>HPV111\_Beta\_186461202\_nt5301\_Genome\_Tile\_rc|1  
ACTACAAGTTGTGAGCCACTAAAATCTTCTACCCCTTCCTCCAATAACAAATCTTCTGAA  
>HPV111\_Beta\_186461202\_nt5321\_Genome\_Tile\_rc|1  
TTGTGCTTCGCCTAGTACCTACTACAAGTTGTGAGCCACTAAAATCTTCTACCCCTTCCT  
>HPV111\_Beta\_186461202\_nt5341\_Genome\_Tile\_rc|1  
GCGGGGAAGTGTAAATGTATTTGTGCTTCGCCTAGTACCTACTACAAGTTGTGAGCCACT  
>HPV111\_Beta\_186461202\_nt5481\_Genome\_Tile\_rc|1  
GTATCTGATATGTGAATCACAACTGTGGGAGCTTCTGGATGAGGAAAAATAATATTTTCA  
>HPV111\_Beta\_186461202\_nt5501\_Genome\_Tile\_rc|1  
GTAAATAATAATCACCAGAAGTATCTGATATGTGAATCACAACTGTGGGAGCTTCTGGAT  
>HPV111\_Beta\_186461202\_nt6301\_Genome\_Tile\_rc|1  
AACAAGCGTCCCATAGACGTCATTAGCCATAGTTAGGAAGTCAGGGTATTACATACTT  
>HPV111\_Beta\_186461202\_nt6421\_Genome\_Tile\_rc|1  
GTGCTGGCAGATAATAATTGTGATTTTGTGCACTGCTGCATCTGGAATTGCATCTCCTA  
>HPV111\_Beta\_186461202\_nt6461\_Genome\_Tile\_rc|1  
TAAATGGAGTTACCCAAAATGTTTTGTTGTTGATTACCCTGTGCTGGCAGATAATAATTG  
>HPV111\_Beta\_186461202\_nt6641\_Genome\_Tile\_rc|1  
TTAGCTTCTGTGGATACGCTTATAGTAAATTAGTGTTTCTGGTATTATCTGCTACTGTT  
>HPV111\_Beta\_186461202\_nt6661\_Genome\_Tile\_rc|1  
TAGCATTATATTGCTGTGCATTAGCTTCTGTGGATACGCTTATAGTAAATTAGTGTTTC  
>HPV111\_Beta\_186461202\_nt6741\_Genome\_Tile\_rc|1  
AACTAAAGAACTTTACATAGTTGAAGAATCAAAGACAATTGATATTCTTCTACATGTCT  
>HPV111\_Beta\_186461202\_nt6761\_Genome\_Tile\_rc|1  
ATTTGAGATAAACTTCTGGAATAAAGAACTTTACATAGTTGAAGAATCAAAGACAAT  
>HPV111\_Beta\_186461202\_nt7061\_Genome\_Tile\_rc|1

GATTTAGTAGATTTTCACAGACGAAGGTTTTAAAGTCCGTTTTTCGTGTTTGTAACCAGCC  
>HPV111\_Beta\_186461202\_nt7081\_Genome\_Tile\_rc|1  
AGGTGCGTCTGCGTTTTGCAGATTTAGTAGATTTTCACAGACGAAGGTTTTAAAGTCCGTT  
>HPV110\_Beta\_186461194\_nt0081\_Genome\_Tile\_rc|1  
AGAAATATATTTATGTAGATGTACCTAAATTGTAACGCATGCGGTTACATGTAGCTATAA  
>HPV110\_Beta\_186461194\_nt0201\_Genome\_Tile\_rc|1  
CAAAATCTACACGGTATTAATATGTCTAAAACAGGAATGCATAATGTATCTGCAAGCTGT  
>HPV110\_Beta\_186461194\_nt0221\_Genome\_Tile\_rc|1  
TATATGATAAAAACCTAGTACAAAATCTACACGGTATTAATATGTCTAAAACAGGAATGC  
>HPV110\_Beta\_186461194\_nt0241\_Genome\_Tile\_rc|1  
ATCAAAACCTAATAATTCTATATATGATAAAAACCTAGTACAAAATCTACACGGTATTAA  
>HPV110\_Beta\_186461194\_nt0261\_Genome\_Tile\_rc|1  
ATAAGTTGTAACCCTTTATAATCAAAACCTAATAATTCTATATATGATAAAAACCTAGTA  
>HPV110\_Beta\_186461194\_nt0381\_Genome\_Tile\_rc|1  
TCTACTATTTCTATTTACGTCCATTTACAGAATGTTTCATAAAAACCTTGTAATTCATAT  
>HPV110\_Beta\_186461194\_nt0401\_Genome\_Tile\_rc|1  
CTTCCCCAATTCCTTTTTGCTCTACTATTTCTATTTACGTCCATTTACAGAATGTTTCAT  
>HPV110\_Beta\_186461194\_nt0461\_Genome\_Tile\_rc|1  
AAACTTCTAGCTTCTCTATTAGATCTAGACGTTTTAAACAATATTGGCAACGCACAACCA  
>HPV110\_Beta\_186461194\_nt0481\_Genome\_Tile\_rc|1  
AAATTGCTGATGCTTACAACAACTTCTAGCTTCTCTATTAGATCTAGACGTTTTAAACA  
>HPV110\_Beta\_186461194\_nt0741\_Genome\_Tile\_rc|1  
AATTCCAAAAACTGTTGCAAGCACAAAAAGCCGAAGTCGCGCACCACAAAGGCCACAAGC  
>HPV110\_Beta\_186461194\_nt0781\_Genome\_Tile\_rc|1  
GCAGCTGTACTTCACCAAGCAAAATTTCTTGCTGAGTACGAATTCCAAAAACTGTTGCAA  
>HPV110\_Beta\_186461194\_nt1341\_Genome\_Tile\_rc|1  
CCAAATGATTCCCTTAAATTTGGCCAATAATACAGCCTTTACATTGCTGCATTTAAGTAAG  
>HPV110\_Beta\_186461194\_nt1601\_Genome\_Tile\_rc|1  
CTATTAATTGAATCTCTCCAATTTGCAAGAGACTCATTAGCAATCTACAAACAGTGTCTC  
>HPV110\_Beta\_186461194\_nt1621\_Genome\_Tile\_rc|1  
TCTTAACCTTTGGTGGCTCAGCTATTAATTGAATCTCTCCAATTTGCAAGAGACTCATTA  
>HPV110\_Beta\_186461194\_nt2061\_Genome\_Tile\_rc|1  
ACATCAAGAAAGTAAATAAAATTAATTTCTGAAACCGTAAAAATTTAACTATATGCGAC  
>HPV110\_Beta\_186461194\_nt2081\_Genome\_Tile\_rc|1  
TATGCAAAAAAGCTTTAAATACATCAAGAAAGTAAATAAAATTAATTTCTGAAACCGTA  
>HPV110\_Beta\_186461194\_nt2121\_Genome\_Tile\_rc|1  
GGAGGTCCATGTATTAGTATACAATTTTGTTTAGGAGTATTATGCAAAAAAGCTTTAAAT  
>HPV110\_Beta\_186461194\_nt2341\_Genome\_Tile\_rc|1  
TTTATGTTTCATATCCAGACAAACAACATTCCCATCTAATACATTTCTAAGATATTTATC  
>HPV110\_Beta\_186461194\_nt2361\_Genome\_Tile\_rc|1  
AATTTTAATTGGCATGGAGCTTTATGTTTCATATCCAGACAAACAACATTCCCATCTAAT  
>HPV110\_Beta\_186461194\_nt2401\_Genome\_Tile\_rc|1  
TTTCATTATATCCATATTGGATGTTAATAATAAGGAGGAAATTTTAATTGGCATGGAGC  
>HPV110\_Beta\_186461194\_nt2781\_Genome\_Tile\_rc|1  
CTTTAGCTTCACTGGTAGCTAATGGTGGTACCAACTGATACCCCAATCTCATTATGCCAT  
>HPV110\_Beta\_186461194\_nt2881\_Genome\_Tile\_rc|1  
ACTGCTTCCAAACTAGTCTGCATTAATGTCCATGACTCAGAAGCATAAGGAGACCTTTGC  
>HPV110\_Beta\_186461194\_nt3001\_Genome\_Tile\_rc|1  
ACTCTTTGATAATAAATGAATGACCATAATGTGTATGACATTAGATTCTCTGGATCACTG  
>HPV110\_Beta\_186461194\_nt3021\_Genome\_Tile\_rc|1  
CTTTGTTCCAAGTATCATCTACTCTTTGATAATAAATGAATGACCATAATGTGTATGACA  
>HPV110\_Beta\_186461194\_nt3301\_Genome\_Tile\_rc|1  
GACCGTTGTGTGGTGGTTCGGGTGGGCAGGGGGGAGGCAGACCGTCGCGGACGGTTGAT  
>HPV110\_Beta\_186461194\_nt3501\_Genome\_Tile\_rc|1  
CCCTGTTGGAGGAGTGGCTCCTGGTGGAGGAGTCTCCTCCCCTCCTTCTGCGTCGATCCC



>HPV110\_Beta\_186461194\_nt3601\_Genome\_Tile\_rc|1  
GAGACGCCACGCCTGGTAGAAGGGCCTCTGGATCTCGACCTTGATTTGGAGCGAGATTGG  
>HPV110\_Beta\_186461194\_nt3761\_Genome\_Tile\_rc|1  
ACTATACTTCTTTTTAGCTCTGTAGCGATAGCACTTTAAGGTGTTAGCAGCGCCGCGCAA  
>HPV110\_Beta\_186461194\_nt3781\_Genome\_Tile\_rc|1  
CTAAAGTATTTCACTAAAGCACTATACTTCTTTTTAGCTCTGTAGCGATAGCACTTTAAG  
>HPV110\_Beta\_186461194\_nt3801\_Genome\_Tile\_rc|1  
CAACCCAAGACCATGTAGTGCTAAAGTATTTCACTAAAGCACTATACTTCTTTTTAGCTC  
>HPV110\_Beta\_186461194\_nt3861\_Genome\_Tile\_rc|1  
TATTTGAGCTAAAAGCTAATAGCATTCTAGCACGCCCTATTCTATCATTATTGTCGCCCC  
>HPV110\_Beta\_186461194\_nt4481\_Genome\_Tile\_rc|1  
GTACAGCTGCAGAACC GCGGCCACCTGAAACAAC TGGTGTGTCTACTGGCACATTATCTG  
>HPV110\_Beta\_186461194\_nt4501\_Genome\_Tile\_rc|1  
GCTAGGATCTGCAACTTCTAGTACAGCTGCAGAACC GCGGCCACCTGAAACAAC TGGTGT  
>HPV110\_Beta\_186461194\_nt4621\_Genome\_Tile\_rc|1  
TTCAAATACTAAAACATGATCTGCCATAGAAGATTTCGCTTAGCAATGGTGTAGATTCTGT  
>HPV110\_Beta\_186461194\_nt4661\_Genome\_Tile\_rc|1  
CAGCCTGTCTAGTGCCACCAATACTTTGTCCACCTGCACCTTCAAATACTAAAACATGAT  
>HPV110\_Beta\_186461194\_nt4701\_Genome\_Tile\_rc|1  
CATGATTGTAGCTCAATACTTTCTGTGCTGTATCAATGGCAGCCTGTCTAGTGCCACCA  
>HPV110\_Beta\_186461194\_nt5021\_Genome\_Tile\_rc|1  
CTTGAGGTGTTTCAGCGACTGTGGGACGGCCTAATCTTACCACATCTAAAAATTGTCTAT  
>HPV110\_Beta\_186461194\_nt5041\_Genome\_Tile\_rc|1  
CCGACTGACTCTTAAATAACCTTGAGGTGTTTCAGCGACTGTGGGACGGCCTAATCTTAC  
>HPV110\_Beta\_186461194\_nt5081\_Genome\_Tile\_rc|1  
GAGCACCCTGCGAGTTCTAATGGTTGCACGCCGTCCAAGCCGACTGACTCTTAAATAAC  
>HPV110\_Beta\_186461194\_nt5101\_Genome\_Tile\_rc|1  
GTGTACTTGTGTTCTTACTTGAGCACCCTGCGAGTTCTAATGGTTGCACGCCGTCCAAG  
>HPV110\_Beta\_186461194\_nt5161\_Genome\_Tile\_rc|1  
ACCAAGTATTTGCATTTCAATAGGAGCTTCAGAATCAATTGTGCTTAAATCTCTGTAAAA  
>HPV110\_Beta\_186461194\_nt5261\_Genome\_Tile\_rc|1  
CAAAC TGCCCAACATTTAAAGGATCTGGCTCGTCTATATTAACATCTACAAAGGAAC TTT  
>HPV110\_Beta\_186461194\_nt5281\_Genome\_Tile\_rc|1  
TTCTTCTATTTCCATTGATTCAAAC TGCCCAACATTTAAAGGATCTGGCTCGTCTATATT  
>HPV110\_Beta\_186461194\_nt5301\_Genome\_Tile\_rc|1  
TCAGCAGAATTATAATCTGGTTCTTCTATTTCCATTGATTCAAAC TGCCCAACATTTAAA  
>HPV110\_Beta\_186461194\_nt5321\_Genome\_Tile\_rc|1  
CATGGTCATCTAGTAAAAAATCAGCAGAATTATAATCTGGTTCTTCTATTTCCATTGATT  
>HPV110\_Beta\_186461194\_nt5361\_Genome\_Tile\_rc|1  
GGATTTCCAAAATACCAATTGTGAACCACTAAAATCATCTACATGGTCATCTAGTAAAAAA  
>HPV110\_Beta\_186461194\_nt5481\_Genome\_Tile\_rc|1  
TCAGTGTTGTCTCTAGATTCTGGGTAAGCAACAGTATGGCCTTGAATATCTTGTATATAA  
>HPV110\_Beta\_186461194\_nt5521\_Genome\_Tile\_rc|1  
TATGACCACAGTTGGAGTATCAGGTAGTGGGAGTATAATTTTCAGTGTTGTCTCTAGATT  
>HPV110\_Beta\_186461194\_nt5541\_Genome\_Tile\_rc|1  
CCACTAGTGTCACTGATGTGTATGACCACAGTTGGAGTATCAGGTAGTGGGAGTATAATT  
>HPV110\_Beta\_186461194\_nt7161\_Genome\_Tile\_rc|1  
AAAATTTATTGACACCGATATCGGTCACGACCGTTTGC GTTTGGTACCCCTTAGAGACCTT  
>HPV110\_Beta\_186461194\_nt7201\_Genome\_Tile\_rc|1  
AACACGGTAAAAAACATACTTACATACCAGATTGGTTATAAAAATTTATTGACACCGATA  
>HPV107\_Beta\_126131393\_nt0081\_Genome\_Tile\_rc|2  
TATCGGTGACAGTTGCAGCCAAATGGATGTTCTGCCAAGAAAAC TGGCAGACTTTTGGC  
>HPV107\_Beta\_126131393\_nt0101\_Genome\_Tile\_rc|1  
TCAAAACAAAATAC TTTACCGTTATCGGTGACAGTTGCAGCCAAATGGATGTTCTGCCAAGA  
>HPV107\_Beta\_126131393\_nt0141\_Genome\_Tile\_rc|1

ACAATCACCATATGAGTAATTTAGCAACCGGCACCGGTGCTCAAAACAAATACTTACCGT  
>HPV107\_Beta\_126131393\_nt0201\_Genome\_Tile\_rc|1  
TTTATATTAGATACTACACATGCGGTTACATGTAATATGTCAAGATGATGGTTGTAAACC  
>HPV107\_Beta\_126131393\_nt0221\_Genome\_Tile\_rc|1  
TTGTAGAAGCACAAAATATTTTTATATTAGATACTACACATGCGGTTACATGTAATATGT  
>HPV107\_Beta\_126131393\_nt0241\_Genome\_Tile\_rc|1  
GTCCATGAGCATCTGAACAGTTGTAGAAGCACAAAATATTTTTATATTAGATACTACACA  
>HPV107\_Beta\_126131393\_nt0261\_Genome\_Tile\_rc|1  
TGTACGATTGTCCTTGGCCTGTCCATGAGCATCTGAACAGTTGTAGAAGCACAAAATATT  
>HPV107\_Beta\_126131393\_nt0281\_Genome\_Tile\_rc|1  
TATTAAGATGCTGTGTAAGCTGTACGATTGTCCTTGGCCTGTCCATGAGCATCTGAACAG  
>HPV107\_Beta\_126131393\_nt0301\_Genome\_Tile\_rc|1  
CAGTAAGTCTTCCACTGGTATATTAAGATGCTGTGTAAGCTGTACGATTGTCCTTGGCCT  
>HPV107\_Beta\_126131393\_nt0321\_Genome\_Tile\_rc|1  
TTGCAAAATTTGCAAGGTACCAGTAAGTCTTCCACTGGTATATTAAGATGCTGTGTAAGC  
>HPV107\_Beta\_126131393\_nt0341\_Genome\_Tile\_rc|1  
CTATAAAAGTTAAGAATCGTTTGCAAAATTTGCAAGGTACCAGTAAGTCTTCCACTGGTA  
>HPV107\_Beta\_126131393\_nt0381\_Genome\_Tile\_rc|1  
CAAATTAATTGTAAATTTTTATAATCAAATTTGTAAGTTCTATAAAAGTTAAGAATCGT  
>HPV107\_Beta\_126131393\_nt0401\_Genome\_Tile\_rc|1  
CATATACTAAATTTTCATGCCAAATTAATTGTAAATTTTTATAATCAAATTTGTAAAGTT  
>HPV107\_Beta\_126131393\_nt0461\_Genome\_Tile\_rc|1  
ATTCAAAATGATTTTTAAATTCAAACGCTGCTGATGCATAAGCACAGCTGCAACAACAAC  
>HPV107\_Beta\_126131393\_nt0481\_Genome\_Tile\_rc|1  
CTGCTTACCTACAACCTGAAATTCAAATGATTTTTAAATTCAAACGCTGCTGATGCATA  
>HPV107\_Beta\_126131393\_nt0501\_Genome\_Tile\_rc|1  
TGCTGAGTGATCTCCTCAATCTGCTTACCTACAACCTGAAATTCAAAATGATTTTTAAAT  
>HPV107\_Beta\_126131393\_nt0521\_Genome\_Tile\_rc|1  
TATTAATAAATCCAATACTTTGCTGAGTGATCTCCTCAATCTGCTTACCTACAACCTGAA  
>HPV107\_Beta\_126131393\_nt0541\_Genome\_Tile\_rc|1  
TAAACAAAACACACATCTAATATTAATAAATCCAATACTTTGCTGAGTGATCTCCTCAAT  
>HPV107\_Beta\_126131393\_nt0901\_Genome\_Tile\_rc|1  
CTTGAAGCAAAAGATCCTGCAATGCCGAATGCCAAAATGGGTTGCAAAAACGTAGAGAC  
>HPV107\_Beta\_126131393\_nt0921\_Genome\_Tile\_rc|1  
TGGACAGATCAGTTGGACTTCTTGAAGCAAAAGATCCTGCAATGCCGAATGCCAAAATG  
>HPV107\_Beta\_126131393\_nt1441\_Genome\_Tile\_rc|1  
AGTAGCTTTAACATTACTAGATTTTAACAGCTGTTTAAATGCATCTCTCCCACTCCCTT  
>HPV107\_Beta\_126131393\_nt1461\_Genome\_Tile\_rc|1  
TCCTTAAATTTTCCATTAAAGTAGCTTTAACATTACTAGATTTTAACAGCTGTTTAAAA  
>HPV107\_Beta\_126131393\_nt1561\_Genome\_Tile\_rc|1  
ATCATCTTGAACACAGTATATGGTTACAACCCAATCTTTGCAACACGCTTATTGCTCTT  
>HPV107\_Beta\_126131393\_nt1581\_Genome\_Tile\_rc|1  
ATCTTAGAAGCTTCTAATAAATCATCTTGAACACAGTATATGGTTACAACCCAATCTTTG  
>HPV107\_Beta\_126131393\_nt1641\_Genome\_Tile\_rc|1  
TATAATGTCATAGGCTGTAGTACATGCATCCATATATAATTACAATGTTTTGTAACAAT  
>HPV107\_Beta\_126131393\_nt1741\_Genome\_Tile\_rc|1  
GGGAGGCTCTAATAATGCCTGCATATCATCAATTTGCAGAATGGAACCTAATAATCTACA  
>HPV107\_Beta\_126131393\_nt1861\_Genome\_Tile\_rc|1  
TGCTTGATGACTTATCATAGTTTGAGCTACTATCCAGTCTGGATACGTACCAAATGAATA  
>HPV107\_Beta\_126131393\_nt1881\_Genome\_Tile\_rc|1  
GAAAACTGTGTAGCCTCTGCTGCTTGATGACTTATCATAGTTTGAGCTACTATCCAGTCT  
>HPV107\_Beta\_126131393\_nt2241\_Genome\_Tile\_rc|1  
TAAAGCACATACAATTTCTTTTTGGAGTATTCTTTAAAAACGTACGAAATTTATCCAAA  
>HPV107\_Beta\_126131393\_nt2261\_Genome\_Tile\_rc|1  
TACCAGAATCTGGTGGACCATAAAAGCACATACAATTTCTTTTTGGAGTATTCTTTAAAA

>HPV107\_Beta\_126131393\_nt2321\_Genome\_Tile\_rc|1  
TTGCAAAGGAAAGTACTCTTCCTTTCAATACATTTATTAAGGACATAGTAAACATAGATT  
>HPV107\_Beta\_126131393\_nt2341\_Genome\_Tile\_rc|1  
CCAAAAGTGGCTTCTGGAGTTTGCAAAGGAAAGTACTCTTCCTTTCAATACATTTATTAA  
>HPV107\_Beta\_126131393\_nt2421\_Genome\_Tile\_rc|1  
AAAAATGTATCAATATAATTCCAGCATTCTTGTGTAGCATCATCTAGCAAAGCAAGCTTA  
>HPV107\_Beta\_126131393\_nt2481\_Genome\_Tile\_rc|1  
TGTAACGGAGCCCTGTGTTTAATGTCTAAAGATACATAATTACCATCTACACCATTTCTT  
>HPV107\_Beta\_126131393\_nt2501\_Genome\_Tile\_rc|1  
TTAATGGAGGAAATTTGATCTGTAAACGGAGCCCTGTGTTTAATGTCTAAAGATACATAAT  
>HPV107\_Beta\_126131393\_nt2561\_Genome\_Tile\_rc|1  
TTCTAGTATGTAGATACCTGTACTTTTCCTCCTTTAGTATATTCATATTTGTGGTAATCA  
>HPV107\_Beta\_126131393\_nt2581\_Genome\_Tile\_rc|1  
TGGGAATTCAAAAAATTCTATTCTAGTATGTAGATACCTGTACTTTTCCTCCTTTAGTAT  
>HPV107\_Beta\_126131393\_nt2601\_Genome\_Tile\_rc|1  
TTATCAAATGGAAATTTGTTTGGGAATTCAAAAATTCTATTCTAGTATGTAGATACCTG  
>HPV107\_Beta\_126131393\_nt2621\_Genome\_Tile\_rc|1  
GAAATTGTGGCTTGTATTATTATCAAATGGAAATTTGTTTGGGAATTCAAAAATTCTA  
>HPV107\_Beta\_126131393\_nt2901\_Genome\_Tile\_rc|1  
AAGTTGCAAGACTTGGGACTGGTTGATATCCAGTCGCAAAATACCATTTTCGCCTAGCAA  
>HPV107\_Beta\_126131393\_nt3001\_Genome\_Tile\_rc|1  
CTAGTTTGCACCAAACCTCCATGTTTCCTCGGCATATTTGGAGTTCTGCAAACCTTTGTAAC  
>HPV107\_Beta\_126131393\_nt3101\_Genome\_Tile\_rc|1  
GTATATCATACGATTTTCAGGATCTCCATCAAACACCACTTCAATAGTCTGTGGTTCCTT  
>HPV107\_Beta\_126131393\_nt3141\_Genome\_Tile\_rc|1  
TGTCTCTGTATTCTGAAAATAAATCCAGTTCCTACTGTGTATATCATACGATTTTCAG  
>HPV107\_Beta\_126131393\_nt3161\_Genome\_Tile\_rc|1  
TCCTTTAACTTTTGGCCATATGTCCTCTGTATTCTGAAAATAAATCCAGTTCCTACTGT  
>HPV107\_Beta\_126131393\_nt3181\_Genome\_Tile\_rc|1  
GCACCCTCATAGTCCACATGTCCTTTAACTTTTTGCCATATGTCCTCTGTATTCTGAAAA  
>HPV107\_Beta\_126131393\_nt3201\_Genome\_Tile\_rc|1  
GTGTGCCTTCCATGTAAAAGGCACCCTCATAGTCCACATGTCCTTTAACTTTTTGCCATA  
>HPV107\_Beta\_126131393\_nt3221\_Genome\_Tile\_rc|1  
CTTTATATAATAATGTTTGTGTGTGCCTTCCATGTAAAAGGCACCCTCATAGTCCACATG  
>HPV107\_Beta\_126131393\_nt3241\_Genome\_Tile\_rc|1  
CTGTTAGCATCATTTTCAAACCTTTATATAATAATGTTTGTGTGTGCCTTCCATGTAAAAG  
>HPV107\_Beta\_126131393\_nt3921\_Genome\_Tile\_rc|1  
GCTTTTTTGCGTGCTCTAAAGCGATAGCATTTAAGCTGGTTTGCTTCCCCCTCTTAACAAAA  
>HPV107\_Beta\_126131393\_nt3961\_Genome\_Tile\_rc|1  
CAGGACCAGGTACTACTAAAATACTTATAGTTTCCTTTGTGCTTTTTTGCGTGCTCTAAAG  
>HPV107\_Beta\_126131393\_nt3981\_Genome\_Tile\_rc|1  
CATTACTATGTTCCCTATCCAGGACCAGGTACTACTAAAATACTTATAGTTTCCTTTGT  
>HPV107\_Beta\_126131393\_nt4041\_Genome\_Tile\_rc|1  
ACATTTACGTTGGTGTGTGGATGTAAACTAACTAACATTCGGGCTCTACCTATTCTAT  
>HPV107\_Beta\_126131393\_nt4061\_Genome\_Tile\_rc|1  
TAATTTCATAGTATCTAAAAACATTTACGTTGGTGTGTGGATGTAAACTAACTAACAT  
>HPV107\_Beta\_126131393\_nt4101\_Genome\_Tile\_rc|1  
AGCTGTCAAAATTCCTATATGACCAGTCTACACCTTGTGGTAATTTTCATAGTATCTAAAA  
>HPV107\_Beta\_126131393\_nt4121\_Genome\_Tile\_rc|1  
GCAAAAAGGTTAGTATTATAAGCTGTCAAAATTCCTATATGACCAGTCTACACCTTGTGG  
>HPV107\_Beta\_126131393\_nt4141\_Genome\_Tile\_rc|1  
CTAGGCAGCAGTTAAAAATAGCAAAAAGGTTAGTATTATAAGCTGTCAAAATTCCTATAT  
>HPV107\_Beta\_126131393\_nt4161\_Genome\_Tile\_rc|1  
CCATGTTAGTATGTTAGTAGCTAGGCAGCAGTTAAAAATAGCAAAAAGGTTAGTATTATA  
>HPV107\_Beta\_126131393\_nt4181\_Genome\_Tile\_rc|1

TTTAGTTCTGCGCGCACGCGCCATGTTAGTATGTTAGTAGCTAGGCAGCAGTTAAAAATA  
>HPV107\_Beta\_126131393\_nt4621\_Genome\_Tile\_rc|1  
GTTACAACAGGTGTGTCTATTTCTGTATCTGGCACAGGAACAGGATGCACTTCTGCAATA  
>HPV107\_Beta\_126131393\_nt4681\_Genome\_Tile\_rc|1  
GTGCGTATTGGGGGGCTGGGGTCTGCCACCTCTAGGACAGCAGAGGAACCTCGACCGCCT  
>HPV107\_Beta\_126131393\_nt4701\_Genome\_Tile\_rc|1  
ACTGGGTACGTGACACACGTGTGCGTATTGGGGGGCTGGGGTCTGCCACCTCTAGGACAG  
>HPV107\_Beta\_126131393\_nt4741\_Genome\_Tile\_rc|1  
GGTGTAGATTTCGGATATTATCTGAAAGGATGGATTGTGATACTGGGTACGTGACACACGT  
>HPV107\_Beta\_126131393\_nt4781\_Genome\_Tile\_rc|1  
CACTAACACTTGGTCTGACAGGGATGCCTCACCAGCAATAGGTGTAGATTTCGGATATTAT  
>HPV107\_Beta\_126131393\_nt4821\_Genome\_Tile\_rc|1  
CCCGAATCCCACCGATTGTTTGTCTCCAGTATTTTCAAACACTAACACTTGGTCTGACA  
>HPV107\_Beta\_126131393\_nt4861\_Genome\_Tile\_rc|1  
AAACTATACCTAGAAGGTAAGGGTTGCAATTCAATTTCTTCCGAATCCCACCGATTGTT  
>HPV107\_Beta\_126131393\_nt4961\_Genome\_Tile\_rc|1  
GCGCCTATTATACAGGGCTCTTCGAATGGAGGAAAGCGCTTGCCTACCTCTTCAATAGG  
>HPV107\_Beta\_126131393\_nt5161\_Genome\_Tile\_rc|1  
GGGGTTTCGGAATATAGAGGCCTACCTAACTTGGCAACATCCAAAAATTGCCTGTCAGGA  
>HPV107\_Beta\_126131393\_nt5181\_Genome\_Tile\_rc|1  
TGACCCGTATATAGCCTTGTGGGGTTTCGGAATATAGAGGCCTACCTAACTTGGCAACAT  
>HPV107\_Beta\_126131393\_nt5201\_Genome\_Tile\_rc|1  
GGCTCTGTTGCCTAATCTACTGACCCGTATATAGCCTTGTGGGGTTTCGGAATATAGAGG  
>HPV107\_Beta\_126131393\_nt5221\_Genome\_Tile\_rc|1  
CCGCTTCTGGTTCGTAAAGAGGCTCTGTTGCCTAATCTACTGACCCGTATATAGCCTTGT  
>HPV107\_Beta\_126131393\_nt5261\_Genome\_Tile\_rc|1  
AACATCTTTATAAAAGTGTACTTGTGCCCTACTTGTGCACCGCTTCTGGTTCGTAAAGA  
>HPV107\_Beta\_126131393\_nt5341\_Genome\_Tile\_rc|1  
GGCCCTTGGATAATACTGGTGTCTCCTGAATGTTCCCCCAGTAATTGTAGTTCAATAGGA  
>HPV107\_Beta\_126131393\_nt5381\_Genome\_Tile\_rc|1  
AGTATCCCTTACATTAATATCCACCAGTGACTTTCAACAGGCCCTTGGATAATACTGGT  
>HPV107\_Beta\_126131393\_nt5401\_Genome\_Tile\_rc|1  
GAACCTTCAAGCAATTCTGGAGTATCCCTTACATTAATATCCACCAGTGACTTTCAACA  
>HPV107\_Beta\_126131393\_nt5421\_Genome\_Tile\_rc|1  
GATCCTGAGAGTTAAATTCAGAACTTTCAAGCAATTCTGGAGTATCCCTTACATTAATAT  
>HPV107\_Beta\_126131393\_nt5441\_Genome\_Tile\_rc|1  
TATAGCATCATCAATAAGTAGATCCTGAGAGTTAAATTCAGAACTTTCAAGCAATTCTGG  
>HPV107\_Beta\_126131393\_nt5501\_Genome\_Tile\_rc|1  
GACAGAAGTGGTAGACCGTCTAGGGTTGCCAAACACTAGCTGTGACCCACTAAAATCCTC  
>HPV107\_Beta\_126131393\_nt5521\_Genome\_Tile\_rc|1  
GAACTAAATCTGGGTACAGTGACAGAAGTGGTAGACCGTCTAGGGTTGCCAAACACTAGC  
>HPV107\_Beta\_126131393\_nt5541\_Genome\_Tile\_rc|1  
ATAAAGTAGTTCCCTTGGAGAATAAATCTGGGTACAGTGACAGAAGTGGTAGACCGTC  
>HPV107\_Beta\_126131393\_nt5681\_Genome\_Tile\_rc|1  
ATGGGGATGTAAATAGTAATCAGCACCTGATTCCCCAAAATGGATAACAACCTGCAGGAAT  
>HPV107\_Beta\_126131393\_nt5701\_Genome\_Tile\_rc|1  
TTGCGCTTGCCTGCTGTAAATGGGGATGTAAATAGTAATCAGCACCTGATTCCCCAAAA  
>HPV107\_Beta\_126131393\_nt5861\_Genome\_Tile\_rc|1  
TTAATAATCTGTCACTAGTGGCGTGATAAAATATATTGGTCCGCTCCACGTACTCATCGG  
>HPV107\_Beta\_126131393\_nt6161\_Genome\_Tile\_rc|1  
GTCTATCATCTGTTGAACTGTTTTGATAGCTATTTGTATTTTCAGTGTCTTTACCTTAT  
>HPV107\_Beta\_126131393\_nt6301\_Genome\_Tile\_rc|1  
TTTTAATTCAATGGGCGGACATTTACCTTGTGTTGGTCACCAGCATCATCGCATGGCAGTGC  
>HPV107\_Beta\_126131393\_nt6321\_Genome\_Tile\_rc|1  
CCATCTTCTATAAAAGAATTTTTTAATTCAATGGGCGGACATTTACCTTGTGTTGGTCACCA

>HPV107\_Beta\_126131393\_nt6361\_Genome\_Tile\_rc|1  
CTTGTTATTTATATTGCCAAACCCAATATCTATCATATCCCCATCTTCTATAAAAGAATT  
>HPV107\_Beta\_126131393\_nt6381\_Genome\_Tile\_rc|1  
GATTTGTTTACTGATAATGTCTTGTTATTTATATTGCCAAACCCAATATCTATCATATCC  
>HPV107\_Beta\_126131393\_nt6401\_Genome\_Tile\_rc|1  
CTAAATCTAAACTAACATCTGATTTGTTTACTGATAATGTCTTGTTATTTATATTGCCAA  
>HPV107\_Beta\_126131393\_nt6561\_Genome\_Tile\_rc|1  
TGATTAGTTGTTGTATCAGGTATAGCATCACCCACAGCTCCTCCTCTAGTGAAATAATGT  
>HPV107\_Beta\_126131393\_nt6581\_Genome\_Tile\_rc|1  
CTATATAGTATTTGTGATCTTGATTAGTTGTTGTATCAGGTATAGCATCACCCACAGCTC  
>HPV107\_Beta\_126131393\_nt6601\_Genome\_Tile\_rc|1  
GGATTGTCCACTCTTAGGTGCTATATAGTATTTGTGATCTTGATTAGTTGTTGTATCAGG  
>HPV107\_Beta\_126131393\_nt6621\_Genome\_Tile\_rc|1  
GAATTACCCAAAGGACTTTGGGATTGTCCACTCTTAGGTGCTATATAGTATTTGTGATCT  
>HPV107\_Beta\_126131393\_nt6661\_Genome\_Tile\_rc|1  
AGAAGAACTAAGGAGCCACTAACGGTGGGATAGTAAATAGAATTACCCAAAGGACTTTG  
>HPV107\_Beta\_126131393\_nt6701\_Genome\_Tile\_rc|1  
CACGTTTCAACCAGAAGGGTCTGTAAAGAGCTGTGCATCAGAAGAACTAAGGAGCCAC  
>HPV107\_Beta\_126131393\_nt6841\_Genome\_Tile\_rc|1  
CCTGATATTATTGGCATCATATTCTGTAAGGGGTCCATTTTGACTAGGCACACTTATAGT  
>HPV107\_Beta\_126131393\_nt6881\_Genome\_Tile\_rc|1  
TTACAGATATTTGATATTCCTCAACATGCCCTTAAAAATTCCTGATATTATTGGCATCAT  
>HPV107\_Beta\_126131393\_nt6941\_Genome\_Tile\_rc|1  
TCATAGCATTAATTTGGGCTAACACATCTGGTTGTAAAGACACTTTACAAAGTTGCAGTA  
>HPV107\_Beta\_126131393\_nt7181\_Genome\_Tile\_rc|1  
GTAGTGTTGTTTGAATAGGAATTTACGTCCTAAAGGATACTGATCTAAATCCAAAGATA  
>HPV107\_Beta\_126131393\_nt7301\_Genome\_Tile\_rc|1  
CATACCACTTTAGTTAGAATACTTGTTTATTTGAGAGGGACCGATTTTCGGTCAAGTACGTT  
>HPV60\_Gamma\_9628566\_nt0001\_Genome\_Tile\_rc|1  
TCTGGTCATATTTTTTTTTATGATTTAATGATAGTTGCCAACAATCAGTGTATATCCTATA  
>HPV60\_Gamma\_9628566\_nt0021\_Genome\_Tile\_rc|1  
AGCTATTTATATATACCTCTTCTGGTCATATTTTTTTTTATGATTTAATGATAGTTGCCAA  
>HPV60\_Gamma\_9628566\_nt0041\_Genome\_Tile\_rc|1  
CTAAAGTTTACGAACGTCTCAGCTATTTATATATACCTCTTCTGGTCATATTTTTTTTTAT  
>HPV60\_Gamma\_9628566\_nt0061\_Genome\_Tile\_rc|1  
TGTCTTCTTCCATCTGCATCCTAAAGTTTACGAACGTCTCAGCTATTTATATATACCTCT  
>HPV60\_Gamma\_9628566\_nt0081\_Genome\_Tile\_rc|1  
AGCCACTGTTGTTGGAAACCTGTCTTCTTCCATCTGCATCCTAAAGTTTACGAACGTCTC  
>HPV60\_Gamma\_9628566\_nt0101\_Genome\_Tile\_rc|1  
TCAAATTCAGAGCAATAATCAGCCACTGTTGTTGGAAACCTGTCTTCTTCCATCTGCATC  
>HPV60\_Gamma\_9628566\_nt0121\_Genome\_Tile\_rc|1  
TAAGATCTTTTAAAGGAATATCAAATTCAGAGCAATAATCAGCCACTGTTGTTGGAAACC  
>HPV60\_Gamma\_9628566\_nt0181\_Genome\_Tile\_rc|1  
TATAAAATGCAGCCAACCTGCTGTTTCAGTTAAGTAAAATCTACAAAATACACATTTTAACT  
>HPV60\_Gamma\_9628566\_nt0261\_Genome\_Tile\_rc|1  
AAATTTAGCAGTAAGTCTAAGACACGGAGTACAACAAGCAAAGCAATAACGGTTTTTCCA  
>HPV60\_Gamma\_9628566\_nt0281\_Genome\_Tile\_rc|1  
TGAAAATAGTTTTTCAGCTTCAAATTTAGCAGTAAGTCTAAGACACGGAGTACAACAAGCA  
>HPV60\_Gamma\_9628566\_nt0301\_Genome\_Tile\_rc|1  
CTTCTCCTTTACACATACACTGAAAATAGTTTTTCAGCTTCAAATTTAGCAGTAAGTCTAA  
>HPV60\_Gamma\_9628566\_nt0321\_Genome\_Tile\_rc|1  
ACGAGTTAGAACTTCTAATACTTCTCCTTTACACATACACTGAAAATAGTTTTTCAGCTTC  
>HPV60\_Gamma\_9628566\_nt0341\_Genome\_Tile\_rc|1  
GAAAGAGAACTCAAAGGAATACGAGTTAGAACCTTCTAATACTTCTCCTTTACACATACAC  
>HPV60\_Gamma\_9628566\_nt0361\_Genome\_Tile\_rc|1

GGCAATCAAAACAGCGTACAGAAAGAGAACTCAAAGGAATACGAGTTAGAACTTCTAATA  
>HPV60\_Gamma\_9628566\_nt0381\_Genome\_Tile\_rc|1  
TGCAAAAGATAACAATGTAAGGCAATCAAAACAGCGTACAGAAAGAGAACTCAAAGGAAT  
>HPV60\_Gamma\_9628566\_nt0401\_Genome\_Tile\_rc|1  
ATTATACAATCTATTTTTTCTGCAAAAGATAACAATGTAAGGCAATCAAAACAGCGTACA  
>HPV60\_Gamma\_9628566\_nt0421\_Genome\_Tile\_rc|1  
GATAAAAGTTTTGACCACTAATTATACAATCTATTTTTTCTGCAAAAGATAACAATGTAA  
>HPV60\_Gamma\_9628566\_nt0481\_Genome\_Tile\_rc|1  
TGATTACCAATCATTCTCAATGCAATTTCTACAATATGATCTCCAGCGACCCCTTACAA  
>HPV60\_Gamma\_9628566\_nt0501\_Genome\_Tile\_rc|1  
CAAGGTTATTAACATTAGGCTGATTACCAATCATTCTCAATGCAATTTCTACAATATGA  
>HPV60\_Gamma\_9628566\_nt0521\_Genome\_Tile\_rc|1  
CAACTCCTCCAAATTTACATCAAGGTTATTAACATTAGGCTGATTACCAATCATTCTCA  
>HPV60\_Gamma\_9628566\_nt0541\_Genome\_Tile\_rc|1  
AAAAGACTGACAGGTAAAACCAACTCCTCCAAATTTACATCAAGGTTATTAACATTAGGC  
>HPV60\_Gamma\_9628566\_nt0561\_Genome\_Tile\_rc|1  
GTGACAACTCCTCATCAGCTAAAAGACTGACAGGTAAAACCAACTCCTCCAAATTTACAT  
>HPV60\_Gamma\_9628566\_nt0581\_Genome\_Tile\_rc|1  
CTCCTCAGGATCACCATCGGGTGACAACCTCCTCATCAGCTAAAAGACTGACAGGTAAAAC  
>HPV60\_Gamma\_9628566\_nt0661\_Genome\_Tile\_rc|1  
GGAGTAGCAATAATAGTAAATCTAACACCTGCTCCACAAGGTTTGCAACAGGTGTCTATT  
>HPV60\_Gamma\_9628566\_nt0681\_Genome\_Tile\_rc|1  
GAAGAGTTATTACAGCAGAAGGAGTAGCAATAATAGTAAATCTAACACCTGCTCCACAAG  
>HPV60\_Gamma\_9628566\_nt0701\_Genome\_Tile\_rc|1  
TTCTTGAAAGCAATAGTTGACGAAGAGTTATTACAGCAGAAGGAGTAGCAATAATAGTAAA  
>HPV60\_Gamma\_9628566\_nt0741\_Genome\_Tile\_rc|1  
GAAAAAGGGATCTGGAGCACCTCAAACAGGTCAGGAACACTTCTTGAAAGCAATAGTTGAC  
>HPV60\_Gamma\_9628566\_nt0801\_Genome\_Tile\_rc|1  
TTCGCTATGCCCTCATTTAATTCAAGAGAATTAATACCTTTATTAGGATCTGCCATGTC  
>HPV60\_Gamma\_9628566\_nt0821\_Genome\_Tile\_rc|1  
GCTTCTGTCACAACATAACCATTTCGCTATGCCCTCATTTAATTCAAGAGAATTAATACCT  
>HPV60\_Gamma\_9628566\_nt0841\_Genome\_Tile\_rc|1  
CCAACTATTAATACACTCAGCTTCTGTGTCACAACATAACCATTTCGCTATGCCCTCATTTA  
>HPV60\_Gamma\_9628566\_nt0861\_Genome\_Tile\_rc|1  
AAATAGCTCTTCCATTGTATCCAACTATTAATACACTCAGCTTCTGTGTCACAACATACCA  
>HPV60\_Gamma\_9628566\_nt0961\_Genome\_Tile\_rc|1  
CTGTTAAGTGTTCATTGTAGAGTGCCAGGGAATTTCCCTCCTCCAGTTCCCTCGGAATCGT  
>HPV60\_Gamma\_9628566\_nt1021\_Genome\_Tile\_rc|1  
TTTTCAAAGGTGTTTTAGTTAACTTTTCGTTTTAGCGCTAAAATAGCTCTATTGCAATCCT  
>HPV60\_Gamma\_9628566\_nt1041\_Genome\_Tile\_rc|1  
AGCAACCGTTCTGTCTGGCTTTTCAAAGGTGTTTTAGTTAACTTTTCGTTTTAGCGCTAA  
>HPV60\_Gamma\_9628566\_nt1081\_Genome\_Tile\_rc|1  
GAGGTGAAATGTGACAGCTTCCAACCTTGGAAGTTAGGTCAGCAACCGTTCTGTCTGGC  
>HPV60\_Gamma\_9628566\_nt1101\_Genome\_Tile\_rc|1  
TCTCCTTTTGCTTTGTCTCTGAGGTGAAATGTGACAGCTTCCAACCTTGGAAGTTAGGTC  
>HPV60\_Gamma\_9628566\_nt1181\_Genome\_Tile\_rc|1  
CTCTCTAAAGAGTTTCGAACTACCTTTTTTCAATAGAATTTGTAGCTTCATCTTCTCCT  
>HPV60\_Gamma\_9628566\_nt1201\_Genome\_Tile\_rc|1  
CCAAGGTCCCACTTTCATTACTCTCTAAAGAGTTCGAACTACCTTTTTTTCAATAGAAT  
>HPV60\_Gamma\_9628566\_nt1241\_Genome\_Tile\_rc|1  
TTTCTATTAGTACTGCGAAATATACTGTCCGTTTCCACAACCAAGGTCCCACTTTCATTA  
>HPV60\_Gamma\_9628566\_nt1281\_Genome\_Tile\_rc|1  
TACACCAAAGTATTCTTTAAATTTAGCCAATAAAGTGGCTTTTCTATTAGTACTGCGAAA  
>HPV60\_Gamma\_9628566\_nt1301\_Genome\_Tile\_rc|1  
CGCGTTAAATCTCCATATGCTACACCAAAGTATTCTTTAAATTTAGCCAATAAAGTGGCT

>HPV60\_Gamma\_9628566\_nt1321\_Genome\_Tile\_rc|1  
ATCTATCACTTTTAAACGGTCGCGTTAAATCTCCATATGCTACACCAAAGTATTCTTTAA  
>HPV60\_Gamma\_9628566\_nt1381\_Genome\_Tile\_rc|1  
AAGCTTCTATTACTTCTTCTGTCAGCGGCACACACACTTATAACCCAGTTTTCACAACATG  
>HPV60\_Gamma\_9628566\_nt1421\_Genome\_Tile\_rc|1  
ACCTGTAAAAAATCACAAATGTTGCTGCATAACTGTTTTTGAAGCTTCTATTACTTCTTCT  
>HPV60\_Gamma\_9628566\_nt1441\_Genome\_Tile\_rc|1  
CATAAAACCCATATGAAATAACCTGTAAAAAATCACAATGTTGCTGCATAACTGTTTTTG  
>HPV60\_Gamma\_9628566\_nt1461\_Genome\_Tile\_rc|1  
AAATTTTACCAAATATAAAGCATAAAACCCATATGAAATAACCTGTAAAAAATCACAATG  
>HPV60\_Gamma\_9628566\_nt1481\_Genome\_Tile\_rc|1  
TCTCTACTTTTTGCTGTTTTTAAATTTTACCAAATATAAAGCATAAAACCCATATGAAATA  
>HPV60\_Gamma\_9628566\_nt1501\_Genome\_Tile\_rc|1  
AAAATAATTTCAATTATAGTATCTCTACTTTTTGCTGTTTTTAAATTTTACCAAATATAAAG  
>HPV60\_Gamma\_9628566\_nt1541\_Genome\_Tile\_rc|1  
TCACACATTAATTGTTGTTCTTGTACATTCAATGTTAAAGAAAATAATTTCAATTATAGTA  
>HPV60\_Gamma\_9628566\_nt1601\_Genome\_Tile\_rc|1  
TTTCCAAATGACCTTCTATAAAAATAAAGAGCTGTTGGGGTACTTCTAGATTTTGGTGGA  
>HPV60\_Gamma\_9628566\_nt1661\_Genome\_Tile\_rc|1  
TGGTCTAACATAGTTAATTTTGCTAACCAATCTGGAAACGGTCCATAAATAAACGATGCA  
>HPV60\_Gamma\_9628566\_nt1681\_Genome\_Tile\_rc|1  
CTGAGCTCGCGGCGGATTTCATGGTCTAACATAGTTAATTTTGCTAACCAATCTGGAAACG  
>HPV60\_Gamma\_9628566\_nt1701\_Genome\_Tile\_rc|1  
TTGAGCAAGTTCAAACCTGTTCTGAGCTCGCGGCGGATTTCATGGTCTAACATAGTTAATTT  
>HPV60\_Gamma\_9628566\_nt1721\_Genome\_Tile\_rc|1  
TCATAAGCAAATTGAATCATTTGAGCAAAGTTCAAACCTGTTCTGAGCTCGCGGCGGATTCA  
>HPV60\_Gamma\_9628566\_nt1741\_Genome\_Tile\_rc|1  
ATTCAGTTGTCAAGTTATTGTCATAAGCAAATTGAATCATTTGAGCAAAGTTCAAACCTGTT  
>HPV60\_Gamma\_9628566\_nt1761\_Genome\_Tile\_rc|1  
ATATTTTATAAGCTATTTTCAGATTTCAGTTGTCAAGTTATTGTCATAAGCAAATTGAATCAT  
>HPV60\_Gamma\_9628566\_nt1781\_Genome\_Tile\_rc|1  
TCAGAATCAGCTAACAAATGCATATTTATAAGCTATTTTCAGATTTCAGTTGTCAAGTTATTG  
>HPV60\_Gamma\_9628566\_nt1881\_Genome\_Tile\_rc|1  
ATCTTTTCATTTCTTGTCTTTTATAATATCTTAACATTGCATAGCAGTCTCGTACATATTT  
>HPV60\_Gamma\_9628566\_nt1921\_Genome\_Tile\_rc|1  
AATCATCGCAACATTTCCATATCCACTCAGAAATTGACATATCTTTTCATTTCTTGTCTTT  
>HPV60\_Gamma\_9628566\_nt2001\_Genome\_Tile\_rc|1  
TGCACATAAAAAATGAAATGAAATTAACCTTCTTGATAACGTAAAAATTGTGCTATTAATTT  
>HPV60\_Gamma\_9628566\_nt2021\_Genome\_Tile\_rc|1  
CCTTTAAACAATGTCTTTAATGCACATAAAAAATGAAATGAAATTAACCTTCTTGATAACGT  
>HPV60\_Gamma\_9628566\_nt2061\_Genome\_Tile\_rc|1  
TGGAGGTCCCCAAAACACTAAACAATTTCTTTTTGGAATACCTTTAAACAATGTCTTTAA  
>HPV60\_Gamma\_9628566\_nt2121\_Genome\_Tile\_rc|1  
TACCACTTTTCCCTGCATAAACCGTGTAAGTGAAGAACAATATAAGACTTTCCTGTATC  
>HPV60\_Gamma\_9628566\_nt2141\_Genome\_Tile\_rc|1  
CTGTGTCTATTTCATGAAAGATACCACTTTTCCCTGCATAAACCGTGTAAGTGAAGAACAA  
>HPV60\_Gamma\_9628566\_nt2161\_Genome\_Tile\_rc|1  
AAGGTTGTAGCCAAAATTGACTGTGTCTATTTCATGAAAGATACCACTTTTCCCTGCATAA  
>HPV60\_Gamma\_9628566\_nt2181\_Genome\_Tile\_rc|1  
TCCAAGCTTACAATCTTGTAAGGTTGTAGCCAAAATTGACTGTGTCTATTTCATGAAAGA  
>HPV60\_Gamma\_9628566\_nt2221\_Genome\_Tile\_rc|1  
CCATGTATTGCCAACATTGAAATGTAGCATCATCTAAGAATCCAAGCTTACAATCTTGTA  
>HPV60\_Gamma\_9628566\_nt2341\_Genome\_Tile\_rc|1  
CATTTTCAACATCAACATTGGTAGTTATTAATAAAGGAGGTAATTTTATTTGTAAAGGAG  
>HPV60\_Gamma\_9628566\_nt2361\_Genome\_Tile\_rc|1

TAAATACATTAAGCTAGCTTCATTTTCAACATCAACATTGGTAGTTATTAATAAAGGAGG  
>HPV60\_Gamma\_9628566\_nt2381\_Genome\_Tile\_rc|1  
AAAAATACTAGTCTACTCTTTAAATACATTAAGCTAGCTTCATTTTCAACATCAACATTG  
>HPV60\_Gamma\_9628566\_nt2421\_Genome\_Tile\_rc|1  
TTCATCATTTTCTTTTAAAGGTAATTTGTTAGGAACTTAAAAATACTAGTCTACTCTT  
>HPV60\_Gamma\_9628566\_nt2441\_Genome\_Tile\_rc|1  
TCAGTAATTTTCATAAAGTACTTCATCATTTTCTTTTAAAGGTAATTTGTTAGGAACTTA  
>HPV60\_Gamma\_9628566\_nt2461\_Genome\_Tile\_rc|1  
AAAAACATTTCCATGATGCATCAGTAATTTTCATAAAGTACTTCATCATTTTCTTTTAAAG  
>HPV60\_Gamma\_9628566\_nt2481\_Genome\_Tile\_rc|1  
ATGGCTTGCAAATTTGATAAAAAAACATTTCCATGATGCATCAGTAATTTTCATAAAGTAC  
>HPV60\_Gamma\_9628566\_nt2521\_Genome\_Tile\_rc|1  
CTGATTCATGCTGCTCGTCTCCTCTGGCTGTCAGCTCTAAATGGCTTGCAAATTTGATAA  
>HPV60\_Gamma\_9628566\_nt2541\_Genome\_Tile\_rc|1  
GAACGCTCGGTCAGATCGGCCTGATTCATGCTGCTCGTCTCCTCTGGCTGTCAGCTCTAA  
>HPV60\_Gamma\_9628566\_nt2561\_Genome\_Tile\_rc|1  
TTTGTTCCTGCAGTGCATCGGAACGCTCGGTCAGATCGGCCTGATTCATGCTGCTCGTCT  
>HPV60\_Gamma\_9628566\_nt2581\_Genome\_Tile\_rc|1  
TTGCTCATATAGATTTCAGTATTTGTTCCCTGCAGTGCATCGGAACGCTCGGTCAGATCGGC  
>HPV60\_Gamma\_9628566\_nt2621\_Genome\_Tile\_rc|1  
AATCCCAATATTGTATTTGGGCCTGAATGTCCTTTGAATCTTGCTCATATAGATTTCAGTA  
>HPV60\_Gamma\_9628566\_nt2641\_Genome\_Tile\_rc|1  
GACATATAGTTTCTATTTAAATCCCAATATTGTATTTGGGCCTGAATGTCCTTTGAATC  
>HPV60\_Gamma\_9628566\_nt2681\_Genome\_Tile\_rc|1  
CCAAATGCGAATAGCCTTCTTTTCTTGCCATAATAGTATGTGACATATAGTTTCTATTTA  
>HPV60\_Gamma\_9628566\_nt2721\_Genome\_Tile\_rc|1  
TTGTACTCTGATACTTGCAAAGCTGGTAAGGGTTGAAGACCCAAATGCGAATAGCCTTCT  
>HPV60\_Gamma\_9628566\_nt2741\_Genome\_Tile\_rc|1  
TTTCGATTGCCCTGCTTGGCTTTGTACTCTGATACTTGCAAAGCTGGTAAGGGTTGAAGAC  
>HPV60\_Gamma\_9628566\_nt2761\_Genome\_Tile\_rc|1  
ACTGGTTAATAACAATCCCATTTTCGATTGCCTGCTTGGCTTTGTACTCTGATACTTGCAA  
>HPV60\_Gamma\_9628566\_nt2781\_Genome\_Tile\_rc|1  
GCATATTGGGATTTGCTTAAACTGGTTAATAACAATCCCATTTTCGATTGCCCTGCTTGGCT  
>HPV60\_Gamma\_9628566\_nt2801\_Genome\_Tile\_rc|1  
TTAAACCCCATAGTTCTGAAGCATATTGGGATTTGCTTAAACTGGTTAATAACAATCCCA  
>HPV60\_Gamma\_9628566\_nt2841\_Genome\_Tile\_rc|1  
TTTCTTGGAGGGGTTAATAACAATTCGCACTTGTATCTGTTAAACCCCATAGTTCTGAA  
>HPV60\_Gamma\_9628566\_nt2861\_Genome\_Tile\_rc|1  
ATCCCTTCTTTTAAATGTATTTCTTGGAGGGGTTAATAACAATTCGCACTTGTATCTG  
>HPV60\_Gamma\_9628566\_nt2881\_Genome\_Tile\_rc|1  
AAACCACACATTTACAGTATATCCCTTCTTTTAAATGTATTTCTTGGAGGGGTTAATAA  
>HPV60\_Gamma\_9628566\_nt2901\_Genome\_Tile\_rc|1  
GTATTATTTTCATTATTATCAAACCACACATTTACAGTATATCCCTTCTTTTAAATGTA  
>HPV60\_Gamma\_9628566\_nt2981\_Genome\_Tile\_rc|1  
AGTCCACCTCTCCTCTGGTCCTGTGCCATTGTTCAATATCATCCTGATAGTAAATATATT  
>HPV60\_Gamma\_9628566\_nt3001\_Genome\_Tile\_rc|1  
TGTGAAATAAAGTCCATTATAGTCCACCTCTCCTCTGGTCCTGTGCCATTGTTCAATATC  
>HPV60\_Gamma\_9628566\_nt3061\_Genome\_Tile\_rc|1  
TGAATATGTTTGTGCATCACTATCAAATAGGAGAAAATATGCTCTATTTCCATTATTTTC  
>HPV60\_Gamma\_9628566\_nt3101\_Genome\_Tile\_rc|1  
TAATTTGGTTTTTATAATGCACTGTCCATGTCCAGTTTGTGAATATGTTTGTGCATCAC  
>HPV60\_Gamma\_9628566\_nt3181\_Genome\_Tile\_rc|1  
GAAGAAGTGGGGTTGCTGCCCCGGCTTTGGAAGTGTAGTCGTCGGAGGATTGTTTTGAGGA  
>HPV60\_Gamma\_9628566\_nt3261\_Genome\_Tile\_rc|1  
CTCGGCGACGTGGTAGAGCTAGAGACTCCCTCTTGTGAGGTCTGTCTCCGTCGGTAGTA



>HPV60\_Gamma\_9628566\_nt3321\_Genome\_Tile\_rc|1  
TCTCTGGAGGATAGTTCTCTTTGTTGCTCGTTGGATCTTCGGCGTCGTAATCGAACAGCA  
>HPV60\_Gamma\_9628566\_nt3341\_Genome\_Tile\_rc|1  
GTCTTTTGGTACGGGGCGACTCTCTGGAGGATAGTTCTCTTTGTTGCTCGTTGGATCTTC  
>HPV60\_Gamma\_9628566\_nt3361\_Genome\_Tile\_rc|1  
GACTTCGTCGGGTACTCTGCGTCTTTTGGTACGGGGCGACTCTCTGGAGGATAGTTCTCT  
>HPV60\_Gamma\_9628566\_nt3401\_Genome\_Tile\_rc|1  
CTTCAGCAGTTGGGGCAGACCCACGGCACTCTGTCGGTCGACTTCGTCGGGTACTCTGC  
>HPV60\_Gamma\_9628566\_nt3481\_Genome\_Tile\_rc|1  
AGGATCCCGAGCTTCTCCTTGAAGTCTTGCAAGTCTTGATATACCGCTTCTAGGAAGAGA  
>HPV60\_Gamma\_9628566\_nt3501\_Genome\_Tile\_rc|1  
CCTTTAATTAGCAGGATTGGAGGATCCCGAGCTTCTCCTTGAAGTCTTGCAAGTCTTGAT  
>HPV60\_Gamma\_9628566\_nt3521\_Genome\_Tile\_rc|1  
ATTTAAGGGAGTTTGCTAGACCTTTAATTAGCAGGATTGGAGGATCCCGAGCTTCTCCTT  
>HPV60\_Gamma\_9628566\_nt3541\_Genome\_Tile\_rc|1  
TTTCAATCGATATCTCCAACATTTAAGGGAGTTTGCTAGACCTTTAATTAGCAGGATTGG  
>HPV60\_Gamma\_9628566\_nt3561\_Genome\_Tile\_rc|1  
TTAAAATAACGTGTATACTTTTTCAATCGATATCTCCAACATTTAAGGGAGTTTGCTAGA  
>HPV60\_Gamma\_9628566\_nt3581\_Genome\_Tile\_rc|1  
TAAATACTGTACTCATACATTTAAAATAACGTGTATACTTTTTCAATCGATATCTCCAAC  
>HPV60\_Gamma\_9628566\_nt3601\_Genome\_Tile\_rc|1  
TACGTCTATGTCTACCCATCTAAATACTGTACTCATACATTTAAAATAACGTGTATACTT  
>HPV60\_Gamma\_9628566\_nt3621\_Genome\_Tile\_rc|1  
TTATGTCTAGAAGATTCTGGTACGTCTATGTCTACCCATCTAAATACTGTACTCATACAT  
>HPV60\_Gamma\_9628566\_nt3641\_Genome\_Tile\_rc|1  
CATTA AAAACA ACTAACAATTTATGTCTAGAAGATTCTGGTACGTCTATGTCTACCCATC  
>HPV60\_Gamma\_9628566\_nt3661\_Genome\_Tile\_rc|1  
AACATCTCGTTGTGTGGTATCATTA AAAACA ACTAACAATTTATGTCTAGAAGATTCTGG  
>HPV60\_Gamma\_9628566\_nt3681\_Genome\_Tile\_rc|1  
AAAGTTACTAATTTTCAAAAACATCTCGTTGTGTGGTATCATTA AAAACA ACTAACAAT  
>HPV60\_Gamma\_9628566\_nt3721\_Genome\_Tile\_rc|1  
AGAGTTTAATGTTCCAAATGTATATGTACAACCTCTTGGCAAAGTTACTAATTTTCAAAA  
>HPV60\_Gamma\_9628566\_nt3761\_Genome\_Tile\_rc|1  
ACTCTAGCATACATTTTGT TTTGT TTTTACAAATATTACAAAGAGTTTAATGTTCCAAATG  
>HPV60\_Gamma\_9628566\_nt3781\_Genome\_Tile\_rc|1  
AGTCTCTTTTAACACGCTTTACTCTAGCATACATTTTGT TTTGT TTTTACAAATATTACAA  
>HPV60\_Gamma\_9628566\_nt3801\_Genome\_Tile\_rc|1  
TTTATATAAGTTTTC AACAGAGTCTCTTTTAACACGCTTTACTCTAGCATACATTTTGT  
>HPV60\_Gamma\_9628566\_nt3821\_Genome\_Tile\_rc|1  
TCAGCACCAAGTTGACATTGTTTATATAAGTTTTC AACAGAGTCTCTTTTAACACGCTTT  
>HPV60\_Gamma\_9628566\_nt3841\_Genome\_Tile\_rc|1  
TTCGTACATCAGGAGGGCAGTCAGCACCAAGTTGACATTGTTTATATAAGTTTTC AACAG  
>HPV60\_Gamma\_9628566\_nt3881\_Genome\_Tile\_rc|1  
TGTAATAATCGATCTGCAAGTGTGGTTCTTCTACTTTATTTTCGTACATCAGGAGGGCAG  
>HPV60\_Gamma\_9628566\_nt3901\_Genome\_Tile\_rc|1  
ATAAGATACTTCCAAATATTTGTAATAATCGATCTGCAAGTGTGGTTCTTCTACTTTAT  
>HPV60\_Gamma\_9628566\_nt3941\_Genome\_Tile\_rc|1  
CCCGATCCTTTACCTGTCCCTATACCCAAATTC CCGAGGTATAAGATACTTCCAAATATT  
>HPV60\_Gamma\_9628566\_nt3961\_Genome\_Tile\_rc|1  
GTGTATAGCCTGTAGCACCCCGATCCTTTACCTGTCCCTATACCCAAATTC CCGAGGT  
>HPV60\_Gamma\_9628566\_nt3981\_Genome\_Tile\_rc|1  
CACTCTTGCAGTACCAAGAGGTGTATAGCCTGTAGCACCCCGATCCTTTACCTGTCCC  
>HPV60\_Gamma\_9628566\_nt4021\_Genome\_Tile\_rc|1  
GTCGTGTGGGTTTATAACTGTTCCAGGTGTAGACGCTGGCACTCTTGCAGTACCAAGAG  
>HPV60\_Gamma\_9628566\_nt4061\_Genome\_Tile\_rc|1

GGAATTCCAGAACCTATTGGATCTAAAGGAACCGAAAACGGTCGTGTGGGTTTTATAACT  
>HPV60\_Gamma\_9628566\_nt4101\_Genome\_Tile\_rc|1  
TATAATGTCCACAGGTAACCGACCTCCTACAGGTTGCGATGGAATTCCAGAACCTATTGG  
>HPV60\_Gamma\_9628566\_nt4121\_Genome\_Tile\_rc|1  
ATAGAGGAAGCACTGGCATCTATAATGTCCACAGGTAACCGACCTCCTACAGGTTGCGAT  
>HPV60\_Gamma\_9628566\_nt4141\_Genome\_Tile\_rc|1  
GGACCTCCTGCAAGGGTATAATAGAGGAAGCACTGGCATCTATAATGTCCACAGGTAACC  
>HPV60\_Gamma\_9628566\_nt4161\_Genome\_Tile\_rc|1  
TATAATGGTGGTCTCTGGCAGGACCTCCTGCAAGGGTATAATAGAGGAAGCACTGGCATC  
>HPV60\_Gamma\_9628566\_nt4201\_Genome\_Tile\_rc|1  
TTTCACTTGCAACCAATCCAGGACCGCTGTCACCGCCTACTATAATGGTGGTCTCTGGCA  
>HPV60\_Gamma\_9628566\_nt4221\_Genome\_Tile\_rc|1  
TGGTTCTGAAACTATATCAATTTCACTTGCAACCAATCCAGGACCGCTGTCACCGCCTAC  
>HPV60\_Gamma\_9628566\_nt4241\_Genome\_Tile\_rc|1  
ACACCGACCACATCTGGTCTTGGTTCTGAAACTATATCAATTTCACTTGCAACCAATCCA  
>HPV60\_Gamma\_9628566\_nt4261\_Genome\_Tile\_rc|1  
ATACTGTTGGTTGAGTATCAACACCGACCACATCTGGTCTTGGTTCTGAAACTATATCAA  
>HPV60\_Gamma\_9628566\_nt4281\_Genome\_Tile\_rc|1  
TGTATTATCAATGGAGGTATATACTGTTGGTTGAGTATCAACACCGACCACATCTGGTCT  
>HPV60\_Gamma\_9628566\_nt4301\_Genome\_Tile\_rc|1  
GTAATGTCTAATGTAGCAACTGTATTATCAATGGAGGTATATACTGTTGGTTGAGTATCA  
>HPV60\_Gamma\_9628566\_nt4341\_Genome\_Tile\_rc|1  
AGGGTCTAATATTATTTTCTTCACTGGTGGTGTAGCTGGTGTAAATGTCTAATGTAGCAAC  
>HPV60\_Gamma\_9628566\_nt4361\_Genome\_Tile\_rc|1  
CCTTCAGAACCTGAACCTATAGGGTCTAATATTATTTTCTTCACTGGTGGTGTAGCTGGT  
>HPV60\_Gamma\_9628566\_nt4381\_Genome\_Tile\_rc|1  
AAAATGTTATTGCTGCAGCACCTTCAGAACCTGAACCTATAGGGTCTAATATTATTTTCT  
>HPV60\_Gamma\_9628566\_nt4401\_Genome\_Tile\_rc|1  
ATCTGCAGCACTTATATCTGAAAATGTTATTGCTGCAGCACCTTCAGAACCTGAACCTAT  
>HPV60\_Gamma\_9628566\_nt4421\_Genome\_Tile\_rc|1  
GGATCAACAAATACATTTAAATCTGCAGCACTTATATCTGAAAATGTTATTGCTGCAGCA  
>HPV60\_Gamma\_9628566\_nt4441\_Genome\_Tile\_rc|1  
TTCTATCTCCTGCTCCCTGAGGATCAACAAATACATTTAAATCTGCAGCACTTATATCTG  
>HPV60\_Gamma\_9628566\_nt4461\_Genome\_Tile\_rc|1  
TATTTCTTCTCCAAAACCTTATTCTATCTCCTGCTCCCTGAGGATCAACAAATACATTTAA  
>HPV60\_Gamma\_9628566\_nt4621\_Genome\_Tile\_rc|1  
GTCCTAAGAAGTCAATATTTTGTGTTGGCTGTTGCTGCACAAATCTATTATATAATTCCC  
>HPV60\_Gamma\_9628566\_nt4761\_Genome\_Tile\_rc|1  
TCGTCCTAATTCCCTGACATCTGCAAAATCCTGGTCTGGCGCTGCAGCCACCTCTTGCAA  
>HPV60\_Gamma\_9628566\_nt4781\_Genome\_Tile\_rc|1  
GATGTTTCTGAAAACCGAGCTCGTCCTAATCCCCTGACATCTGCAAAATCCTGGTCTGGC  
>HPV60\_Gamma\_9628566\_nt4801\_Genome\_Tile\_rc|1  
TGACTCGTATTGTTCCCTGCAGATGTTTCTGAAAACCGAGCTCGTCCTAATCCCCTGACAT  
>HPV60\_Gamma\_9628566\_nt4861\_Genome\_Tile\_rc|1  
CTTTCTGACCAATAGTTAGTCCACTTCGTGTTTTATTGTTCCCTTTTGTTCCTAATCTGC  
>HPV60\_Gamma\_9628566\_nt4881\_Genome\_Tile\_rc|1  
AATATCAAAATAAAAGTGAACCTTCTGACCAATAGTTAGTCCACTTCGTGTTTTATTGT  
>HPV60\_Gamma\_9628566\_nt4921\_Genome\_Tile\_rc|1  
ATGTTCTTAGTTGTATGGTTTCTGCAGCTGGAATATCACTAATATCAAAATAAAAGTGAA  
>HPV60\_Gamma\_9628566\_nt4941\_Genome\_Tile\_rc|1  
ATCGTGGGAAGACTCGCCTAATGTTCTTAGTTGTATGGTTTCTGCAGCTGGAATATCACT  
>HPV60\_Gamma\_9628566\_nt4961\_Genome\_Tile\_rc|1  
ATATTATCTACTGCAGAAAAATCGTGGGAAGACTCGCCTAATGTTCTTAGTTGTATGGTT  
>HPV60\_Gamma\_9628566\_nt4981\_Genome\_Tile\_rc|1  
TAATATATGTACTTTCAGTAATATTATCTACTGCAGAAAAATCGTGGGAAGACTCGCCTA

>HPV60\_Gamma\_9628566\_nt5041\_Genome\_Tile\_rc|1  
TAAATTCATCCTCTAGTATATTGTCAGGTATTAGGCCTTCATTTGTAGTTTCAGTTAAAT  
>HPV60\_Gamma\_9628566\_nt5061\_Genome\_Tile\_rc|1  
TGCATTATTAAAGTTTTCTGTAAATTCATCCTCTAGTATATTGTCAGGTATTAGGCCTTC  
>HPV60\_Gamma\_9628566\_nt5081\_Genome\_Tile\_rc|1  
ATTGTTGCAAAATATCAGCTGTGCATTATTAAAGTTTTCTGTAAATTCATCCTCTAGTATA  
>HPV60\_Gamma\_9628566\_nt5101\_Genome\_Tile\_rc|1  
TCATAGATTCTCCTTCATCTATTGTTGCAAAATATCAGCTGTGCATTATTAAAGTTTTCTG  
>HPV60\_Gamma\_9628566\_nt5121\_Genome\_Tile\_rc|1  
TGGAGGAATTGTGGGCATGATCATAGATTCTCCTTCATCTATTGTTGCAAAATATCAGCTG  
>HPV60\_Gamma\_9628566\_nt5141\_Genome\_Tile\_rc|1  
AATAACTTTAAAGCTACACCTGGAGGAATTGTGGGCATGATCATAGATTCTCCTTCATCT  
>HPV60\_Gamma\_9628566\_nt5201\_Genome\_Tile\_rc|1  
ATAGTCCACTCAGAAGAAGGATGAACCACATTTAACACGCTTGACAGCTATTTCTGGAATA  
>HPV60\_Gamma\_9628566\_nt5241\_Genome\_Tile\_rc|1  
AGCAGGCTGAATAATTTTCATCTGGAACATTAGGAATCAAAATAGTCCACTCAGAAGAAGG  
>HPV60\_Gamma\_9628566\_nt5261\_Genome\_Tile\_rc|1  
TCATAAACATCTACTGCCATAGCAGGCTGAATAATTTTCATCTGGAACATTAGGAATCAAA  
>HPV60\_Gamma\_9628566\_nt5281\_Genome\_Tile\_rc|1  
GAGGATGTAAATAAAAGTCATCATAAACATCTACTGCCATAGCAGGCTGAATAATTTTCAT  
>HPV60\_Gamma\_9628566\_nt5301\_Genome\_Tile\_rc|1  
TTTGCGTCGCCCTAAGAAGATGAGGATGTAAATAAAAGTCATCATAAACATCTACTGCCAT  
>HPV60\_Gamma\_9628566\_nt5401\_Genome\_Tile\_rc|1  
TACACGAGCAACAGGCTTGCTTGGTGGAAGATACAATTGTCCAGCTGTCTGCAACCAAAG  
>HPV60\_Gamma\_9628566\_nt5441\_Genome\_Tile\_rc|1  
AAACTAAATTTGTTGGCTGTACATATTCATCCGTACTGAGTACACGAGCAACAGGCTTGC  
>HPV60\_Gamma\_9628566\_nt5501\_Genome\_Tile\_rc|1  
TGTCTATAATATCAAATAAAGGGTGTCTACAATTAGCATTTCTGTAGTTCCTGTATGAA  
>HPV60\_Gamma\_9628566\_nt5521\_Genome\_Tile\_rc|1  
AGTAATATTATTTGAACCACTGTCTATAATATCAAATAAAGGGTGTCTACAATTAGCAT  
>HPV60\_Gamma\_9628566\_nt5541\_Genome\_Tile\_rc|1  
TTTCCACTACATTTAGGTACAGTAATATTATTTGAACCACTGTCTATAATATCAAATAA  
>HPV60\_Gamma\_9628566\_nt5561\_Genome\_Tile\_rc|1  
GTCGCATAACTCTAAACTGATTTCCACTACATTTAGGTACAGTAATATTATTTGAACCAC  
>HPV60\_Gamma\_9628566\_nt5601\_Genome\_Tile\_rc|1  
CTGTCTATCATTTGCAAATTTGTTTGGATCTGGAAATAGTAGTCGCATAACTCTAAACTGA  
>HPV60\_Gamma\_9628566\_nt5661\_Genome\_Tile\_rc|1  
CCAATTTCAAGGCCTTCCAATCTCCAGACTAATCTCTCTCTTTCTGGGTAAAGACAGCT  
>HPV60\_Gamma\_9628566\_nt5761\_Genome\_Tile\_rc|1  
ATTATTCTGCTTTAAAGGATATGCGGCAGGATTTTCTGTATCTCCATATTTATTAAATAA  
>HPV60\_Gamma\_9628566\_nt5781\_Genome\_Tile\_rc|1  
TCCATTCTATTGTCATCACCATTATTCTGCTTTAAAGGATATGCGGCAGGATTTTCTGTA  
>HPV60\_Gamma\_9628566\_nt5841\_Genome\_Tile\_rc|1  
CCAGTGGCTGGTTTACATCCTACAATAAACAATTGCATTTGTTTTGGATCCATTGAAACA  
>HPV60\_Gamma\_9628566\_nt5861\_Genome\_Tile\_rc|1  
TAGCAATATCCCAGTGTTTACCAGTGGCTGGTTTACATCCTACAATAAACAATTGCATTT  
>HPV60\_Gamma\_9628566\_nt5881\_Genome\_Tile\_rc|1  
TGGAGCAGGATCACAAGGTTTAGCAATATCCCAGTGTTTACCAGTGGCTGGTTTACATCC  
>HPV60\_Gamma\_9628566\_nt5921\_Genome\_Tile\_rc|1  
TAGACTGTGTTAATTTAATTGGGGACAGGATCCTTTTGCTGGAGCAGGATCACAAGGTT  
>HPV60\_Gamma\_9628566\_nt5941\_Genome\_Tile\_rc|1  
CATTTTCAACGCTCCTGAATTATAGACTGTGTTAATTTAATTGGGGGACAGGATCCTTTTGC  
>HPV60\_Gamma\_9628566\_nt6021\_Genome\_Tile\_rc|1  
TCATTGGTAATATCTAGAGGAACACCTGATTTATCTTCTTGCAAGGTAATAAAATTTGCA  
>HPV60\_Gamma\_9628566\_nt6061\_Genome\_Tile\_rc|1

ATCTTTTGTCAATTTTGTAGTAAATCAGGATATTTACAAATTTTCATTGGTAATATCTAGAGG  
>HPV60\_Gamma\_9628566\_nt6141\_Genome\_Tile\_rc|1  
TCTATCCCTCCTCTTACAAAATAATGCCTGGAATAAATTTGTTACGTTTACCAAAGAAA  
>HPV60\_Gamma\_9628566\_nt6161\_Genome\_Tile\_rc|1  
AATCTGGCAAACCTATCTCCATCTATCCCTCCTCTTACAAAATAATGCCTGGAATAAATTT  
>HPV60\_Gamma\_9628566\_nt6181\_Genome\_Tile\_rc|1  
TGGTGCTAAGTAATATCCAGAATCTGGCAAACCTATCTCCATCTATCCCTCCTCTTACAAA  
>HPV60\_Gamma\_9628566\_nt6201\_Genome\_Tile\_rc|1  
TTTTGAGGTTTATCAGTTTGTGGTGCTAAGTAATATCCAGAATCTGGCAAACCTATCTCCA  
>HPV60\_Gamma\_9628566\_nt6221\_Genome\_Tile\_rc|1  
AACTATAACCACCAAGGTTATTTTGTAGGTTTATCAGTTTGTGGTGCTAAGTAATATCCAG  
>HPV60\_Gamma\_9628566\_nt6241\_Genome\_Tile\_rc|1  
ACCACTTGGTGTAGGGAAGTAACCTATAACCACCAAGGTTATTTTGTAGGTTTATCAGTTTGT  
>HPV60\_Gamma\_9628566\_nt6261\_Genome\_Tile\_rc|1  
TTATCACTAGAAGCTACAGAACCACCTGGTGTAGGGAAGTAACCTATAACCACCAAGGTTA  
>HPV60\_Gamma\_9628566\_nt6381\_Genome\_Tile\_rc|1  
ATAGATAAATTAGTATTTTCGAGTATTATCTACTATAGTAATGAATAATTGGTTACCCCAA  
>HPV60\_Gamma\_9628566\_nt6401\_Genome\_Tile\_rc|1  
CATCTTGTGTGTAACCTGAAATAGATAAATTAGTATTTTCGAGTATTATCTACTATAGTAA  
>HPV60\_Gamma\_9628566\_nt6421\_Genome\_Tile\_rc|1  
ATATCTGTTATCAATAGCAGCATCTTGTGTGTAACCTGAAATAGATAAATTAGTATTTTCG  
>HPV60\_Gamma\_9628566\_nt6481\_Genome\_Tile\_rc|1  
CTCTACTTCATATTCCTTCAGTATGGCGTAAATACTGTCTAAAATCTTCCTGTTTATATTT  
>HPV60\_Gamma\_9628566\_nt6501\_Genome\_Tile\_rc|1  
TTACAGAGTCTCAGAATTAACCTCTACTTCATATTCCTTCAGTATGGCGTAAATACTGTCTA  
>HPV60\_Gamma\_9628566\_nt6521\_Genome\_Tile\_rc|1  
CATCTGGATTCAAAGGCACTTTACAGAGTCTCAGAATTAACCTCTACTTCATATTCCTTCAG  
>HPV60\_Gamma\_9628566\_nt6541\_Genome\_Tile\_rc|1  
TACATTTAAATGAGCTAGAACATCTGGATTCAAAGGCACTTTACAGAGTCTCAGAATTAA  
>HPV60\_Gamma\_9628566\_nt6741\_Genome\_Tile\_rc|1  
GATAATTCGTTAGAAAAACGTTCTTGCAAATCTATTGTCCAAAATGTATACTGTTTATAA  
>HPV60\_Gamma\_9628566\_nt6761\_Genome\_Tile\_rc|1  
TTTTTCCAAGAGAAAACCTGGGATAATTCGTTAGAAAAACGTTCTTGCAAATCTATTGTCC  
>HPV60\_Gamma\_9628566\_nt6821\_Genome\_Tile\_rc|1  
TTACAAAACCTACTAGCAGACCGTTTTCGTCCGTTAAGTAAGCCATACTGATATAAATATC  
>HPV60\_Gamma\_9628566\_nt6841\_Genome\_Tile\_rc|1  
CACAGTTTTTGGATTTCTTCGTTACAAAACCTACTAGCAGACCGTTTTTCGTCCGTTAAGTAA  
>HPV60\_Gamma\_9628566\_nt6861\_Genome\_Tile\_rc|1  
TATTTAGTTCTTTTACGTTTTCACAGTTTTTGGATTTCTTCGTTACAAAACCTACTAGCAGAC  
>HPV60\_Gamma\_9628566\_nt6881\_Genome\_Tile\_rc|1  
ATATAATATATATATGTATTTATTTAGTTCTTTTACGTTTTCACAGTTTTTGGATTTCTTCG  
>HPV60\_Gamma\_9628566\_nt6901\_Genome\_Tile\_rc|1  
TAATATATCCTTCATTAATCATATAATATATATATGTATTTATTTAGTTCTTTTACGTTT  
>HPV60\_Gamma\_9628566\_nt6921\_Genome\_Tile\_rc|1  
ACAACAGCAGCATTATTAATTAATATATCCTTCATTAATCATATAATATATATATGTATT  
>HPV60\_Gamma\_9628566\_nt6941\_Genome\_Tile\_rc|1  
ATTTATTAATCCTTCATTTTACAACAGCAGCATTATTAATTAATATATCCTTCATTAATC  
>HPV60\_Gamma\_9628566\_nt6961\_Genome\_Tile\_rc|1  
CAGACACTTGCTGATGTGCAATTTATTAATCCTTCATTTTACAACAGCAGCATTATTAAT  
>HPV60\_Gamma\_9628566\_nt6981\_Genome\_Tile\_rc|1  
AAAATGTAGACCCCGTGAGTCAGACACTTGCTGATGTGCAATTTATTAATCCTTCATTTT  
>HPV60\_Gamma\_9628566\_nt7001\_Genome\_Tile\_rc|1  
TTATGAAGGCGCGGTAGACAAAAATGTAGACCCCGTGAGTCAGACACTTGCTGATGTGCA  
>HPV60\_Gamma\_9628566\_nt7021\_Genome\_Tile\_rc|1  
GATATGCAATGCCAAGATAATTATGAAGGCGCGGTAGACAAAAATGTAGACCCCGTGAGT

>HPV60\_Gamma\_9628566\_nt7041\_Genome\_Tile\_rc|1  
TGATTGTTTCTTATAGTCTCGATATGCAATGCCAAGATAATTATGAAGGCGCGGTAGACA  
>HPV60\_Gamma\_9628566\_nt7061\_Genome\_Tile\_rc|1  
AAATCCGAGAGTGTGCCAAGTGATTGTTTCTTATAGTCTCGATATGCAATGCCAAGATAA  
>HPV60\_Gamma\_9628566\_nt7101\_Genome\_Tile\_rc|1  
TTAACCAGTTACGGTTGGTAAGTGTCCAGCAATGCTTGTTAAATCCGAGAGTGTGCCAAG  
>HPV60\_Gamma\_9628566\_nt7121\_Genome\_Tile\_rc|1  
TTCCCCCTTTGGCGCTCTTTTTTAACCAGTTACGGTTGGTAAGTGTCCAGCAATGCTTGTT  
>HPV60\_Gamma\_9628566\_nt7201\_Genome\_Tile\_rc|1  
AAGAGAGTGAGTCAAACTTTGTATGAACATGTACTTACCTGGAAAACGTTCTTCAGGA  
>HPV60\_Gamma\_9628566\_nt7221\_Genome\_Tile\_rc|1  
AACGGAAATGGTTTCTAACAAAGAGAGTGAGTCAAACTTTGTATGAACATGTACTTACC  
>HPV60\_Gamma\_9628566\_nt7241\_Genome\_Tile\_rc|1  
GGTCTGGCGCATATCCACAGAACGGAAATGGTTTCTAACAAAGAGAGTGAGTCAAACTT  
>HPV50\_Gamma\_9628550\_nt0001\_Genome\_Tile\_rc|1  
ACCGTAGTCGGTTGTCACGTCTCTATGTCTAATAATTGTTGGCAACTATTATTAGATAGA  
>HPV50\_Gamma\_9628550\_nt0021\_Genome\_Tile\_rc|1  
TGATCAGCTCTTTTATATGCACCGTAGTCGGTTGTCACGTCTCTATGTCTAATAATTGTT  
>HPV50\_Gamma\_9628550\_nt0041\_Genome\_Tile\_rc|1  
AGTCTCCTTCAAATCTGTGCTGATCAGCTCTTTTATATGCACCGTAGTCGGTTGTCACGT  
>HPV50\_Gamma\_9628550\_nt0061\_Genome\_Tile\_rc|1  
TAGCTCTCTGAGGCTCCATCAGTCTCCTTCAAATCTGTGCTGATCAGCTCTTTTATATGC  
>HPV50\_Gamma\_9628550\_nt0081\_Genome\_Tile\_rc|1  
GCAATAGTCCACCAAATTTTTAGCTCTCTGAGGCTCCATCAGTCTCCTTCAAATCTGTGC  
>HPV50\_Gamma\_9628550\_nt0101\_Genome\_Tile\_rc|1  
AAACTAATCTGTTGTTGCTTGCAATAGTCCACCAAATTTTTAGCTCTCTGAGGCTCCATC  
>HPV50\_Gamma\_9628550\_nt0121\_Genome\_Tile\_rc|1  
ACTGTAGCTCTAATTCAAAAAAATAATCTGTTGTTGCTTGCAATAGTCCACCAAATTTT  
>HPV50\_Gamma\_9628550\_nt0141\_Genome\_Tile\_rc|1  
AACAAATTTACAAAACAAGCACTGTAGCTCTAATTCAAAAAAATAATCTGTTGTTGCTT  
>HPV50\_Gamma\_9628550\_nt0161\_Genome\_Tile\_rc|1  
GCTAAGTCAGGCAAAGTAATAACAAATTTACAAAACAAGCACTGTAGCTCTAATTCAAAA  
>HPV50\_Gamma\_9628550\_nt0181\_Genome\_Tile\_rc|1  
ACTTTTTTACAATGAAAGCTAGCTAAGTCAGGCAAAGTAATAACAAATTTACAAAACAAGC  
>HPV50\_Gamma\_9628550\_nt0201\_Genome\_Tile\_rc|1  
ATCTCTATAAACAAGAGCTAACTTTTTACAATGAAAGCTAGCTAAGTCAGGCAAAGTAAT  
>HPV50\_Gamma\_9628550\_nt0241\_Genome\_Tile\_rc|1  
ACAATCTTAAGCATTTAGCGCACGCAGCAAAAGCAATACCATCTCTATAAACAAGAGCTA  
>HPV50\_Gamma\_9628550\_nt0261\_Genome\_Tile\_rc|1  
CTCATTTTCAAAGATAGCAGACAATCTTAAGCATTTAGCGCACGCAGCAAAAGCAATACC  
>HPV50\_Gamma\_9628550\_nt0281\_Genome\_Tile\_rc|1  
ATAGAGCAAGTATAATATCTCTCATTTTCAAAGATAGCAGACAATCTTAAGCATTTAGCG  
>HPV50\_Gamma\_9628550\_nt0301\_Genome\_Tile\_rc|1  
CAGATAGCAAGTAAGCTTTTATAGAGCAAGTATAATATCTCTCATTTTCAAAGATAGCAG  
>HPV50\_Gamma\_9628550\_nt0321\_Genome\_Tile\_rc|1  
CAAAGGTCTACCAATCAAATCAGATAGCAAGTAAGCTTTTATAGAGCAAGTATAATATCT  
>HPV50\_Gamma\_9628550\_nt0341\_Genome\_Tile\_rc|1  
CAGCGAATTGCGATTTCACCTCAAAGGTCTACCAATCAAATCAGATAGCAAGTAAGCTTTT  
>HPV50\_Gamma\_9628550\_nt0381\_Genome\_Tile\_rc|1  
GTACTTTTCAATATAATCCAACAAACACATACAATTTTCACAGCGAATTGCGATTTCACCT  
>HPV50\_Gamma\_9628550\_nt0401\_Genome\_Tile\_rc|1  
CCACCGTGACAAATACAATCGTACTTTTCAATATAATCCAACAAACACATACAATTTTCA  
>HPV50\_Gamma\_9628550\_nt0421\_Genome\_Tile\_rc|1  
CTCTAACTAAATGAAAATAACCACCGTGACAAATACAATCGTACTTTTCAATATAATCCA  
>HPV50\_Gamma\_9628550\_nt0441\_Genome\_Tile\_rc|1

ACAACAGCCCCCTCCAATTACCTCTAACTAAATGAAAATAACCACCGTGACAAATACAATC  
>HPV50\_Gamma\_9628550\_nt0461\_Genome\_Tile\_rc|1  
TCATGTTTCGTAAACAATTTCTACAACAGCCCCCTCCAATTACCTCTAACTAAATGAAAATAA  
>HPV50\_Gamma\_9628550\_nt0541\_Genome\_Tile\_rc|1  
AATAGATTTCGTCTACTAAGCAAATTCACAGGCAAAACAAGCTCTTCTAAAACAATATCAGG  
>HPV50\_Gamma\_9628550\_nt0561\_Genome\_Tile\_rc|1  
TCTGCTATGTCATCAGTTTCAATAGATTTCGTCTACTAAGCAAATTCACAGGCAAAACAAGC  
>HPV50\_Gamma\_9628550\_nt0581\_Genome\_Tile\_rc|1  
TGAATGGTGACCTTTCAGATTCTGCTATGTCATCAGTTTCAATAGATTTCGTCTACTAAGCA  
>HPV50\_Gamma\_9628550\_nt0601\_Genome\_Tile\_rc|1  
CTTACACGTAGAAATCAATCTTGAATGGTGACCTTTCAGATTCTGCTATGTCATCAGTTTC  
>HPV50\_Gamma\_9628550\_nt0621\_Genome\_Tile\_rc|1  
CTAACGCGACAATGACAATGCTTACACGTAGAAATCAATCTTGAATGGTGACCTTTCAGAT  
>HPV50\_Gamma\_9628550\_nt0641\_Genome\_Tile\_rc|1  
CGGTGGCGACACAACACAGTCTAACGCGACAATGACAATGCTTACACGTAGAAATCAATCT  
>HPV50\_Gamma\_9628550\_nt0761\_Genome\_Tile\_rc|1  
ATTAGAATTATTATCTGTACCTTTAAGTTCTGCCATTTTCGTAGCAATCTTTGGAGCACT  
>HPV50\_Gamma\_9628550\_nt0821\_Genome\_Tile\_rc|1  
CTGAAAAGAATCATCATCACAGACAGCTTCATTATCAAACAACCTCATTAATAATTTCTAC  
>HPV50\_Gamma\_9628550\_nt0881\_Genome\_Tile\_rc|1  
TTCAGAGTCATCTATTAAATTAGAGATAGTAGATTTCATCCGTACTTTTCATCAAACAATTC  
>HPV50\_Gamma\_9628550\_nt0901\_Genome\_Tile\_rc|1  
GAATTCCCCCTGCACAACGTTTTTCAGAGTCATCTATTAAATTAGAGATAGTAGATTTCATCC  
>HPV50\_Gamma\_9628550\_nt0921\_Genome\_Tile\_rc|1  
GTGCATTTAGTAATGCATGGGAATTCCCCTGCACAACGTTTTTCAGAGTCATCTATTAAAT  
>HPV50\_Gamma\_9628550\_nt0961\_Genome\_Tile\_rc|1  
TTTACTGTAAACCAGGTCTTTGTCTATATTCCTCTGAAAGCTGTGCATTTAGTAATGCATGG  
>HPV50\_Gamma\_9628550\_nt0981\_Genome\_Tile\_rc|1  
GGGTGGCATAAACTTTTCGTTTTACTGTAAACCAGGTCTTTGTCTATATTCCTCTGAAAGCT  
>HPV50\_Gamma\_9628550\_nt1001\_Genome\_Tile\_rc|1  
ATCAGAGGCGAGCTTTTCCGGGGTGGCATAAACTTTTCGTTTTACTGTAAACCAGGTCTTT  
>HPV50\_Gamma\_9628550\_nt1021\_Genome\_Tile\_rc|1  
GCTGAAAGTCTCGGACTCAAATCAGAGGCGAGCTTTTCCGGGGTGGCATAAACTTTTCGT  
>HPV50\_Gamma\_9628550\_nt1161\_Genome\_Tile\_rc|1  
CCGCATCAGCGCCATTTTTGTTTCCCGCCACATTTCGAACATATCATCCTGTACCTGAACAA  
>HPV50\_Gamma\_9628550\_nt1181\_Genome\_Tile\_rc|1  
ATGAAGCAACGAATACAACCTCCGCATCAGCGCCATTTTTGTTTCCCGCCACATTTCGAAC  
>HPV50\_Gamma\_9628550\_nt1221\_Genome\_Tile\_rc|1  
CTTTAAACTTACAAAGCAAAGCAGCTCTACGATTATTGCTATGAAGCAACGAATACAAC  
>HPV50\_Gamma\_9628550\_nt1281\_Genome\_Tile\_rc|1  
TACAACCTCTTATTACTTTTAAAAGTTCTAGTAATTTTCATTAAATGGAATGCCATATTTTT  
>HPV50\_Gamma\_9628550\_nt1301\_Genome\_Tile\_rc|1  
TACAATAATCCAATTTTGTGTACAACCTTATTACTTTTAAAAGTTCTAGTAATTTTCATT  
>HPV50\_Gamma\_9628550\_nt1321\_Genome\_Tile\_rc|1  
TCTTCTGCACAGGCAAAACTACAATAATCCAATTTTGTGTACAACCTTATTACTTTTA  
>HPV50\_Gamma\_9628550\_nt1341\_Genome\_Tile\_rc|1  
TTTTAGAAAGCTTCAATTAAATCTTCTGCACAGGCAAAACTACAATAATCCAATTTTGTG  
>HPV50\_Gamma\_9628550\_nt1361\_Genome\_Tile\_rc|1  
AACATGATTTTGCATCGTGGTTTTAGAAGCTTCAATTAAATCTTCTGCACAGGCAAAAC  
>HPV50\_Gamma\_9628550\_nt1381\_Genome\_Tile\_rc|1  
GTAATCATTTGTAAATAGGAAACATGATTTTGCATCGTGGTTTTAGAAGCTTCAATTAAA  
>HPV50\_Gamma\_9628550\_nt1421\_Genome\_Tile\_rc|1  
AGCCTTAAAGCAAATAATATACAAAGCTGAAAAATCAGAAGTAATCATTTGTAAATAGGA  
>HPV50\_Gamma\_9628550\_nt1441\_Genome\_Tile\_rc|1  
ACAGTCTCTCTGCTCTTAGCAGCCTTAAAGCAAATAATATACAAAGCTGAAAAATCAGAA

>HPV50\_Gamma\_9628550\_nt1461\_Genome\_Tile\_rc|1  
AGCTATTAATCAATTTAACAACAGTCTCTCTGCTCTTAGCAGCCTTAAAGCAAATAATAT  
>HPV50\_Gamma\_9628550\_nt1481\_Genome\_Tile\_rc|1  
TTCTCTCTTTGTATTTAGCAAGCTATTAATCAATTTAACAACAGTCTCTCTGCTCTTAGC  
>HPV50\_Gamma\_9628550\_nt1501\_Genome\_Tile\_rc|1  
GGAGGATCACATAGTACTTGTTCCTCTTTTGTATTTAGCAAGCTATTAATCAATTTAACA  
>HPV50\_Gamma\_9628550\_nt1521\_Genome\_Tile\_rc|1  
CAGCCATACTTTTTATTTTAGGAGGATCACATAGTACTTGTTCCTCTTTTGTATTTAGCA  
>HPV50\_Gamma\_9628550\_nt1541\_Genome\_Tile\_rc|1  
TTTATAGCAATATAATGCTGCAGCCATACTTTTTATTTTAGGAGGATCACATAGTACTTG  
>HPV50\_Gamma\_9628550\_nt1561\_Genome\_Tile\_rc|1  
CAGGTATCTGCTATTACCTTTTTATAGCAATATAATGCTGCAGCCATACTTTTTATTTTA  
>HPV50\_Gamma\_9628550\_nt1581\_Genome\_Tile\_rc|1  
GAAAGTCTCCATATTTATAACAGGTATCTGCTATTACCTTTTTATAGCAATATAATGCTG  
>HPV50\_Gamma\_9628550\_nt1601\_Genome\_Tile\_rc|1  
ATGTGTGGCTATCCAGTCAGGAAAGTCTCCATATTTATAACAGGTATCTGCTATTACCTT  
>HPV50\_Gamma\_9628550\_nt1621\_Genome\_Tile\_rc|1  
AGCTGATGATTTATAACAGTATGTGTGGCTATCCAGTCAGGAAAGTCTCCATATTTATAA  
>HPV50\_Gamma\_9628550\_nt1641\_Genome\_Tile\_rc|1  
TAAAGCTGTCTGCAGTTGCTAGCTGATTTATAACAGTATGTGTGGCTATCCAGTCAG  
>HPV50\_Gamma\_9628550\_nt1721\_Genome\_Tile\_rc|1  
ATAGCACGCATAATTGTAAGCAATTGCAGCTTCATCCAGCATATCATTATCGTATGCCCA  
>HPV50\_Gamma\_9628550\_nt1741\_Genome\_Tile\_rc|1  
GCATTTTTCATTTTCACTTGCATAGCACGCATAATTGTAAGCAATTGCAGCTTCATCCAGC  
>HPV50\_Gamma\_9628550\_nt1761\_Genome\_Tile\_rc|1  
TAGTTTGTA AAAATGCAGCTGCATTTTCATTTTCACTTGCATAGCACGCATAATTGTAAG  
>HPV50\_Gamma\_9628550\_nt1821\_Genome\_Tile\_rc|1  
CTTGCTTTTTGTATAACCTGACCATTGCACAACATTCCTTAACATACTTTAATTGACTAT  
>HPV50\_Gamma\_9628550\_nt1841\_Genome\_Tile\_rc|1  
CATAGTCATATTCCTCATTTCTTGCTTTTGTATAACCTGACCATTGCACAACATTCCTT  
>HPV50\_Gamma\_9628550\_nt1861\_Genome\_Tile\_rc|1  
CATGATTTAATCCATTCTGGCATAGTCATATTCCTCATTTCTTGCTTTTGTATAACCTG  
>HPV50\_Gamma\_9628550\_nt1921\_Genome\_Tile\_rc|1  
TGATATTTTAAATATCTTACAATAACTTTCCAATCATCAGAATTATAATTATTTGTGAAA  
>HPV50\_Gamma\_9628550\_nt2001\_Genome\_Tile\_rc|1  
AAATAACTAAGCACATTTTTTTTAGGTATGCCTTTTAAAAGTAACTTTAAAGCTAACAAAA  
>HPV50\_Gamma\_9628550\_nt2081\_Genome\_Tile\_rc|1  
CATGAAGGATACAACTTTTCTCTCATAACTGAATAAATTGATAACAAAAGTATGACTT  
>HPV50\_Gamma\_9628550\_nt2101\_Genome\_Tile\_rc|1  
CAAAAATGACTATTTTTGTTTCATGAAGGATACAACTTTTCTCTCATAACTGAATAAAT  
>HPV50\_Gamma\_9628550\_nt2121\_Genome\_Tile\_rc|1  
AATCTAATAAAGGCATTAACCAAAAATGACTATTTTTGTTTCATGAAGGATACAACTTTTC  
>HPV50\_Gamma\_9628550\_nt2141\_Genome\_Tile\_rc|1  
ATCTAAAAATCCTATTTTTGAATCTAATAAAGGCATTAACCAAAAATGACTATTTTTGTT  
>HPV50\_Gamma\_9628550\_nt2161\_Genome\_Tile\_rc|1  
CAACAACATTGAGTTGCATCATCTAAAAATCCTATTTTTGAATCTAATAAAGGCATTAAC  
>HPV50\_Gamma\_9628550\_nt2221\_Genome\_Tile\_rc|1  
ACATCAACAGAACTGCATTACCATCAAATGCATTTCTCATGTGTGTCCAAATACATC  
>HPV50\_Gamma\_9628550\_nt2261\_Genome\_Tile\_rc|1  
CATAGGTGGTAAAACATTTTGTGTGTAATTTTATGTTTCACATCAACAGAACTGCATT  
>HPV50\_Gamma\_9628550\_nt2281\_Genome\_Tile\_rc|1  
TCACAATTTGTTGTTATTAACATAGGTGGTAAAACATTTTGTGTGTAATTTTATGTTTC  
>HPV50\_Gamma\_9628550\_nt2301\_Genome\_Tile\_rc|1  
ACGTTGGATCTCTGCATACATCACAATTTGTTGTTATTAACATAGGTGGTAAAACATTTT  
>HPV50\_Gamma\_9628550\_nt2321\_Genome\_Tile\_rc|1

TCTACTCCTTAAGTACATAAACGTTGGATCTCTGCATACATCACAATTTGTTGTTATTAA  
>HPV50\_Gamma\_9628550\_nt2341\_Genome\_Tile\_rc|1  
GGAAAGTTAAAACATGTTAATCTACTCCTTAAGTACATAAACGTTGGATCTCTGCATACA  
>HPV50\_Gamma\_9628550\_nt2361\_Genome\_Tile\_rc|1  
CATACAATGGTAACTTATTTGGAAAGTTAAAACATGTTAATCTACTCCTTAAGTACATAA  
>HPV50\_Gamma\_9628550\_nt2381\_Genome\_Tile\_rc|1  
AAATTTTGGTTCTCCATTTTCATACAATGGTAACTTATTTGGAAAGTTAAAACATGTTAA  
>HPV50\_Gamma\_9628550\_nt2401\_Genome\_Tile\_rc|1  
CAGCAATTATCAGTAAATTTAAATTTTGGTTCTCCATTTTCATACAATGGTAACTTATTT  
>HPV50\_Gamma\_9628550\_nt2421\_Genome\_Tile\_rc|1  
ACTTGCTAAAAAAGACGTCAGCAATTATCAGTAAATTTAAATTTTGGTTCTCCATTTT  
>HPV50\_Gamma\_9628550\_nt2461\_Genome\_Tile\_rc|1  
CCATCTGGGTCATCTTCAGGTAAATCTAAGTGCTTCCAAAACCTTGCTAAAAAAGACGTC  
>HPV50\_Gamma\_9628550\_nt2561\_Genome\_Tile\_rc|1  
TAGTCTATATGGTCTTTTAAATTTTTGAATCTTTTCAATCAGATTCAATTGAATGTCT  
>HPV50\_Gamma\_9628550\_nt2581\_Genome\_Tile\_rc|1  
CTTTTCTCATAGATTCCCAATAGTCTATATGGTCTTTTAAATTTTTGAATCTTTTTCAA  
>HPV50\_Gamma\_9628550\_nt2601\_Genome\_Tile\_rc|1  
ATAAAATGCAAGCACTTGTCTTTTCTCATAGATTCCCAATAGTCTATATGGTCTTTTAA  
>HPV50\_Gamma\_9628550\_nt2621\_Genome\_Tile\_rc|1  
CTCATATTTCTTTTTTTTGCATAAAATGCAAGCACTTGTCTTTTCTCATAGATTCCCAA  
>HPV50\_Gamma\_9628550\_nt2641\_Genome\_Tile\_rc|1  
GAGGTTGTAATCCAAGCCTGCTCATATTTTCTTTTTTTTGCATAAAATGCAAGCACTTGT  
>HPV50\_Gamma\_9628550\_nt2661\_Genome\_Tile\_rc|1  
AGAAACCTTAGCAGGAGGAAGAGGTTGTAATCCAAGCCTGCTCATATTTTCTTTTTTTGC  
>HPV50\_Gamma\_9628550\_nt2701\_Genome\_Tile\_rc|1  
AAAGTAATTGAATTCTAATTGCATCTTTTGCTTTTTTGCTCAGAAACCTTAGCAGGAGGAA  
>HPV50\_Gamma\_9628550\_nt2741\_Genome\_Tile\_rc|1  
CATGGTTCAGACCCAAAATCAGACTTATACAAGGATTGCAAAAGTAATTGAATTCTAATT  
>HPV50\_Gamma\_9628550\_nt2761\_Genome\_Tile\_rc|1  
AACTACATTCTGATAAAGTCCATGGTTCAGACCCAAAATCAGACTTATACAAGGATTGCA  
>HPV50\_Gamma\_9628550\_nt2781\_Genome\_Tile\_rc|1  
AGGTGCATTTAACATTTCTAAACTACATTCTGATAAAGTCCATGGTTCAGACCCAAAATC  
>HPV50\_Gamma\_9628550\_nt2801\_Genome\_Tile\_rc|1  
TTTTTAAACAATTTCTAGGAGGTGCATTTAACATTTCTAAACTACATTCTGATAAAGTC  
>HPV50\_Gamma\_9628550\_nt2821\_Genome\_Tile\_rc|1  
CAGTTACAGTAAACGGTTGTTTTTAAACAATTTCTAGGAGGTGCATTTAACATTTCTA  
>HPV50\_Gamma\_9628550\_nt2901\_Genome\_Tile\_rc|1  
TTTGTCTCTATCATCTTGATAATATATATATTCATAACATATATAAGGATACACATTTT  
>HPV50\_Gamma\_9628550\_nt2921\_Genome\_Tile\_rc|1  
AGACCTTTAACTTTATGCCATTTGTCTCTATCATCTTGATAATATATATATTCATAACAT  
>HPV50\_Gamma\_9628550\_nt2961\_Genome\_Tile\_rc|1  
ACCAGTCACTTCTTTAAATAAAGGCCATTGTGATCCACTAGACCTTTAACTTTATGCCA  
>HPV50\_Gamma\_9628550\_nt2981\_Genome\_Tile\_rc|1  
AGTTTAAAGTATACTGAATCACCAGTCACTTCTTTAAATAAAGGCCATTGTGATCCACT  
>HPV50\_Gamma\_9628550\_nt3001\_Genome\_Tile\_rc|1  
CAGTGGCATCAGGTTGAAAGAGTTTAAAGTATACTGAATCACCAGTCACTTCTTTAAAT  
>HPV50\_Gamma\_9628550\_nt3101\_Genome\_Tile\_rc|1  
TCGTCAGCAGGCCCAAACGCACTCCTTGAGGAGCTAGTGACAGAGGAATGAATAGTTTTG  
>HPV50\_Gamma\_9628550\_nt3121\_Genome\_Tile\_rc|1  
ATGTGGAAGGCCCGGGCTGTTTCGTCAGCAGGCCCAAACGCACTCCTTGAGGAGCTAGTGA  
>HPV50\_Gamma\_9628550\_nt3181\_Genome\_Tile\_rc|1  
TGTCCTGTAGGGCTTTTGGTTGACCGCTTCCAGATCTTTCCTGTTGGCTCTTGTCGTACG  
>HPV50\_Gamma\_9628550\_nt3201\_Genome\_Tile\_rc|1  
TGTCGAGGTGGGTGGTTCGGTGTCTGTAGGGCTTTTGGTTGACCGCTTCCAGATCTTTC



>HPV50\_Gamma\_9628550\_nt3221\_Genome\_Tile\_rc|1  
CGTCGAAGTCGTACTGTTGATGTGTCGAGGTGGGTGGTTCGGTGTCTGTAGGGCTTTTGGT  
>HPV50\_Gamma\_9628550\_nt3241\_Genome\_Tile\_rc|1  
GTTCTCTTTCTCGTCGTCTCGTCGAAGTCGTACTGTTGATGTGTCGAGGTGGGTGGTTCGG  
>HPV50\_Gamma\_9628550\_nt3281\_Genome\_Tile\_rc|1  
CCCAATTCTGATTGTGACTTTCTGTGTCTGTAGGAATGGTGTCTCTTTCTCGTCGTCTCT  
>HPV50\_Gamma\_9628550\_nt3301\_Genome\_Tile\_rc|1  
GAGTTGGCGCAGAGTCGGCTCCCAATTCTGATTGTGACTTTCTGTGTCTGTAGGAATGGT  
>HPV50\_Gamma\_9628550\_nt3361\_Genome\_Tile\_rc|1  
GTCTAAGTCTTGACAGACCATGCGCTGCAACTGTGTGAGATCTTCTTCCCACTTCTTCAG  
>HPV50\_Gamma\_9628550\_nt3441\_Genome\_Tile\_rc|1  
CCTATACCTCCAACATTTAAGATTATTCTGTTGACCTGTAATAATTAGGACTGGTGGATC  
>HPV50\_Gamma\_9628550\_nt3481\_Genome\_Tile\_rc|1  
AGCTACAACACTCATAGAGATCTGCATATTTTTGTGAGAACCTATACCTCCAACATTTAA  
>HPV50\_Gamma\_9628550\_nt3501\_Genome\_Tile\_rc|1  
GCCCCAACCACTTCCATGCAGAGCTACAACACTCATAGAGATCTGCATATTTTTGTGAGAA  
>HPV50\_Gamma\_9628550\_nt3521\_Genome\_Tile\_rc|1  
CTGTATCCCTCTGATTTTGGGCCCAACCACTTCCATGCAGAGCTACAACACTCATAGAGA  
>HPV50\_Gamma\_9628550\_nt3541\_Genome\_Tile\_rc|1  
TAAGCAATTTAGCATCACCCCTGTATCCCTCTGATTTTGGGCCCAACCACTTCCATGCAG  
>HPV50\_Gamma\_9628550\_nt3561\_Genome\_Tile\_rc|1  
TTCAGGATTTTTTAAAAGCAATAAGCAATTTAGCATCACCCCTGTATCCCTCTGATTTTGG  
>HPV50\_Gamma\_9628550\_nt3581\_Genome\_Tile\_rc|1  
TTTTAAAAAGATAGCCTTTGTTTCAGGATTTTTTAAAAGCAATAAGCAATTTAGCATCACCC  
>HPV50\_Gamma\_9628550\_nt3641\_Genome\_Tile\_rc|1  
CATTATAGAGAGTCCAAATGTCCCATAGAGTACGTAGTATTTTTGGGTAATCCAACAGTG  
>HPV50\_Gamma\_9628550\_nt3841\_Genome\_Tile\_rc|1  
CTATAGCCAAAAGTACCCCCAGTTCCTCTTCCTGTTCCAATTCCCAAATGCCAAAGTAT  
>HPV50\_Gamma\_9628550\_nt3881\_Genome\_Tile\_rc|1  
TTCCTGAGTTGGCCTTCCAGACCCAGGGGCCCAAAAGGTCTATAGCCAAAAGTACCCCC  
>HPV50\_Gamma\_9628550\_nt3901\_Genome\_Tile\_rc|1  
TTTGGTCTTGCGATAGGTAGTTCCTGAGTTGGCCTTCCAGACCCAGGGGCCCAAAAGGT  
>HPV50\_Gamma\_9628550\_nt3941\_Genome\_Tile\_rc|1  
TGGTACAATAGGCGCTGGCCCTAATGGATCTATAACAACATTTGGTCTTGCGATAGGTAG  
>HPV50\_Gamma\_9628550\_nt3981\_Genome\_Tile\_rc|1  
CTTCTACTAATGGAACATTGAAGCTGCAGAGGGATCTACTGGTACAATAGGCGCTGGCC  
>HPV50\_Gamma\_9628550\_nt4001\_Genome\_Tile\_rc|1  
AAATCCAACATCAGGGGCGCCTTCTACTAATGGAACATTGAAGCTGCAGAGGGATCTAC  
>HPV50\_Gamma\_9628550\_nt4061\_Genome\_Tile\_rc|1  
TGTTATAGTATATAATTCAATATCAGTTCCACCTGCTGCAGGTCCAGCATCTGGAGCTGC  
>HPV50\_Gamma\_9628550\_nt4081\_Genome\_Tile\_rc|1  
CCAACATCTGTTGTGGAATTTGTTATAGTATATAATTCAATATCAGTTCCACCTGCTGCA  
>HPV50\_Gamma\_9628550\_nt4121\_Genome\_Tile\_rc|1  
TTCTTCGTTAGAGGTAACAGTGGGCCCCACCACCAACAGCACCAACATCTGTTGTGGAATT  
>HPV50\_Gamma\_9628550\_nt4141\_Genome\_Tile\_rc|1  
TCTATAACAGCTACTTCAAATTCCTCGTTAGAGGTAACAGTGGGCCCCACCACCAACAGCA  
>HPV50\_Gamma\_9628550\_nt4181\_Genome\_Tile\_rc|1  
ATATAATAATTGCTTTGGATAGGGTGCAATTGGTTGTGCATCTATAACAGCTACTTCAA  
>HPV50\_Gamma\_9628550\_nt4221\_Genome\_Tile\_rc|1  
GATTAATCTGTGTTTCAAAGTTGCTGTATAGTAGAGTCATATAAATTGCTTTGGAT  
>HPV50\_Gamma\_9628550\_nt4241\_Genome\_Tile\_rc|1  
TATGTCTGGATTTATGAAGGGATTAATCTGTGTTTCAAAGTTGCTGTCTATAGTAGAGTC  
>HPV50\_Gamma\_9628550\_nt4261\_Genome\_Tile\_rc|1  
ACTAATACATTAACATTATTTATGTCTGGATTTATGAAGGGATTAATCTGTGTTTCAAAA  
>HPV50\_Gamma\_9628550\_nt4301\_Genome\_Tile\_rc|1

AAAGTAGTCACCTACAGTGTCTCCTGCAAAGCTGGGGTCAACTAATACATTAACATTATT  
>HPV50\_Gamma\_9628550\_nt4321\_Genome\_Tile\_rc|1  
TCCAAAGGTATCTCTTCATAAAAGTAGTCACCTACAGTGTCTCCTGCAAAGCTGGGGTCA  
>HPV50\_Gamma\_9628550\_nt4341\_Genome\_Tile\_rc|1  
AGGTTTGAATATCTAAACGTTCCAAAGGTATCTCTTCATAAAAGTAGTCACCTACAGTGT  
>HPV50\_Gamma\_9628550\_nt4381\_Genome\_Tile\_rc|1  
TGGGTGGGCGTGCTTTCAGTAGGTGGCTCTAAAATGTCAAAGGTTTGAATATCTAAACGT  
>HPV50\_Gamma\_9628550\_nt4401\_Genome\_Tile\_rc|1  
AAACAAACCTATTACCTAATTGGGTGGGCGTGCTTTCAGTAGGTGGCTCTAAAATGTCAA  
>HPV50\_Gamma\_9628550\_nt4441\_Genome\_Tile\_rc|1  
TGCTGTGCAACAAATCGACTGTACAGATCTCTTGCCCTAGAAACAAACCTATTACCTAAT  
>HPV50\_Gamma\_9628550\_nt4481\_Genome\_Tile\_rc|1  
GCGGGAAGGTTGACTCAAAAAATCTGGCTCAGATATTGGCTGCTGTGCAACAAATCGACT  
>HPV50\_Gamma\_9628550\_nt4501\_Genome\_Tile\_rc|1  
CTATATTCAAACTGAACAAGGCGGGAAGGTTGACTCAAAAAATCTGGCTCAGATATTGGC  
>HPV50\_Gamma\_9628550\_nt4541\_Genome\_Tile\_rc|1  
CTCAAAGTATAGGCTCACATCTGGGTCAAAGGCGGGATTTCTATATTCAAACTGAACAAG  
>HPV50\_Gamma\_9628550\_nt4621\_Genome\_Tile\_rc|1  
CTGGATACTCTTGGCCTGCCTAAATAAACTACATCAGCAAATTCCTGCAATGGCGCTGCC  
>HPV50\_Gamma\_9628550\_nt4641\_Genome\_Tile\_rc|1  
TTATTGTACCTTCTGAGGTGCTGGATACTCTTGGCCTGCCTAAATAAACTACATCAGCAA  
>HPV50\_Gamma\_9628550\_nt4661\_Genome\_Tile\_rc|1  
GGTACCTAATCTACTTACTCTTATTGTACCTTCTGAGGTGCTGGATACTCTTGGCCTGCC  
>HPV50\_Gamma\_9628550\_nt4681\_Genome\_Tile\_rc|1  
CGTGTGTGTTAAAGCTGCTCTGGTACCTAATCTACTTACTCTTATTGTACCTTCTGAGGTG  
>HPV50\_Gamma\_9628550\_nt4701\_Genome\_Tile\_rc|1  
GTCCCACAGAAAGACCACTACGTGTTGTTAAAGCTGCTCTGGTACCTAATCTACTTACTC  
>HPV50\_Gamma\_9628550\_nt4721\_Genome\_Tile\_rc|1  
CATATAAAAGTGTTACCTGAGGTCCCACAGAAAGACCACTACGTGTTGTTAAAGCTGCTCT  
>HPV50\_Gamma\_9628550\_nt4741\_Genome\_Tile\_rc|1  
GGAGGTATATCACTTAAATCCATATAAAAGTGTTACCTGAGGTCCCACAGAAAGACCACTA  
>HPV50\_Gamma\_9628550\_nt4781\_Genome\_Tile\_rc|1  
TGGTGTAACGTTTAAATGTATGCAACTCTATAGAATCCTCTGGAGGTATATCACTTAAATC  
>HPV50\_Gamma\_9628550\_nt4801\_Genome\_Tile\_rc|1  
TCTACAATTGTACTTGTGTTGTGGTGTAACGTTTAAATGTATGCAACTCTATAGAATCCTCT  
>HPV50\_Gamma\_9628550\_nt4821\_Genome\_Tile\_rc|1  
TAGTTGTTGCTAATATATCATCTACAATTGTACTTGTGTTGTGGTGTAACGTTTAAATGTAT  
>HPV50\_Gamma\_9628550\_nt4841\_Genome\_Tile\_rc|1  
GTTTGCAGGATCATCAAATGTAGTTGTTGCTAATATATCATCTACAATTGTACTTGTGTTG  
>HPV50\_Gamma\_9628550\_nt4861\_Genome\_Tile\_rc|1  
TTAAACTGTGTAAATAAGGAGTTTGCAGGATCATCAAATGTAGTTGTTGCTAATATATCA  
>HPV50\_Gamma\_9628550\_nt4881\_Genome\_Tile\_rc|1  
CGTCTGTTAATACATCTTCATTAAACTGTGTAAATAAGGAGTTTGCAGGATCATCAAATG  
>HPV50\_Gamma\_9628550\_nt4901\_Genome\_Tile\_rc|1  
TGTAATAATTATGTTCAACATCGTCTGTTAATACATCTTCATTAAACTGTGTAAATAAGGA  
>HPV50\_Gamma\_9628550\_nt4921\_Genome\_Tile\_rc|1  
GGTATAACTAAATGAGACTCTGTAAATTTATGTTCAACATCGTCTGTTAATACATCTTCA  
>HPV50\_Gamma\_9628550\_nt4941\_Genome\_Tile\_rc|1  
CATTTTCTTCATCAGTAGCTGGTATAACTAAATGAGACTCTGTAAATTTATGTTCAACAT  
>HPV50\_Gamma\_9628550\_nt4961\_Genome\_Tile\_rc|1  
AATAATATTTATTGCTGTGTGCTTTTCTTCATCAGTAGCTGGTATAACTAAATGAGACTC  
>HPV50\_Gamma\_9628550\_nt5021\_Genome\_Tile\_rc|1  
TAATGTAGTAGATATGTCACCTGAATTCATGCCCACAGTAAGAGGAATATTTCTTAAATT  
>HPV50\_Gamma\_9628550\_nt5041\_Genome\_Tile\_rc|1  
TCTAAATATTATAATCTGATAATGTAGTAGATATGTCACCTGAATTCATGCCCACAGTA

>HPV50\_Gamma\_9628550\_nt5061\_Genome\_Tile\_rc|1  
ATTTTACTATCAAGGATGCATCTAAAATATTATAATCTGATAATGTAGTAGATATGTCAC  
>HPV50\_Gamma\_9628550\_nt5081\_Genome\_Tile\_rc|1  
GGGCTGTTTCAGAAACATTTGATTTTACTATCAAGGATGCATCTAAAATATTATAATCTGA  
>HPV50\_Gamma\_9628550\_nt5101\_Genome\_Tile\_rc|1  
GAATAATCTAAAACAAAAAGGGCTGTTTCAGAAACATTTGATTTTACTATCAAGGATGCA  
>HPV50\_Gamma\_9628550\_nt5141\_Genome\_Tile\_rc|1  
TCTTCTTTTTTGGAGAAGACCTGGATGTAAATCATAATCTGAATAATCTAAAACAAAAAG  
>HPV50\_Gamma\_9628550\_nt5161\_Genome\_Tile\_rc|1  
AATTAAAAATAATCTATGCGTCTTCTTTTTTGGAGAAGACCTGGATGTAAATCATAATCT  
>HPV50\_Gamma\_9628550\_nt5221\_Genome\_Tile\_rc|1  
GTACTTGGTGGAGGTATAACTTTCCAGAGGTTGAGGACCAATGAGCCATCTGTAAAATA  
>HPV50\_Gamma\_9628550\_nt6721\_Genome\_Tile\_rc|1  
GCTTATCTGGTACGTTTTCTCTTGTGTTGGTTTGGAACTGTAGCAACAGTGTAATCAGTT  
>HPV50\_Gamma\_9628550\_nt6761\_Genome\_Tile\_rc|1  
AGTACAATATTCACAGTAAAGCCAAGAAAGCATGTCAGCAGCTTATCTGGTACGTTTTCT  
>HPV50\_Gamma\_9628550\_nt6781\_Genome\_Tile\_rc|1  
ATTCACAGTATAGAATTCACAGTACAATATTCACAGTAAAGCCAAGAAAGCATGTCAGCA  
>HPV50\_Gamma\_9628550\_nt6801\_Genome\_Tile\_rc|1  
TCAAGACTCAGATCTAAAGCATTACAGTATAGAATTCACAGTACAATATTCACAGTAAA  
>HPV50\_Gamma\_9628550\_nt6821\_Genome\_Tile\_rc|1  
TTATTCATTTTGTGAAATGTTCAAGACTCAGATCTAAAGCATTACAGTATAGAATTCAC  
>HPV50\_Gamma\_9628550\_nt6901\_Genome\_Tile\_rc|1  
AACATATTTTATACTACAAAGGGCGGGAGTAAATAACTCTGACTCAAAGACAACACACACC  
>HPV50\_Gamma\_9628550\_nt6921\_Genome\_Tile\_rc|1  
ATGATTGATCACAGAGGTGCAACATATTTATACTACAAAGGGCGGGAGTAAATAACTCTG  
>HPV50\_Gamma\_9628550\_nt6941\_Genome\_Tile\_rc|1  
AGCACGTCCAGCTGGTCAACATGATTGATCACAGAGGTGCAACATATTTATACTACAAAG  
>HPV50\_Gamma\_9628550\_nt7041\_Genome\_Tile\_rc|1  
TATCTTTGTTAGCAAGTACCGACTTCGGTCGCTTTATATTCCCTAAAGGCATACAAACTT  
>HPV50\_Gamma\_9628550\_nt7081\_Genome\_Tile\_rc|1  
ACTGAGGTGACTCAGAGGTTTGTCTAACTCGTGAGATTTTATCTTTGTTAGCAAGTACC  
>HPV50\_Gamma\_9628550\_nt7101\_Genome\_Tile\_rc|1  
TACTTTCTTCTGCCAGCTGCACTGAGGTGACTCAGAGGTTTGTCTAACTCGTGAGATTT  
>HPV48\_Gamma\_9628542\_nt0001\_Genome\_Tile\_rc|1  
TACTGTCTCGGTTCCCTAAGTTATTATGCACGATTGTTGCCAACAATTATTATGCGTCAGA  
>HPV48\_Gamma\_9628542\_nt0021\_Genome\_Tile\_rc|1  
GTTTCAGCAGTATTTATATGATACTGTCTCGGTTCCCTAAGTTATTATGCACGATTGTTGCC  
>HPV48\_Gamma\_9628542\_nt0061\_Genome\_Tile\_rc|1  
TAGGAAATTGTGGCTCCATCAGCTTCTGAAGAAATCTACTGTTTCAGCAGTATTTATATGA  
>HPV48\_Gamma\_9628542\_nt0081\_Genome\_Tile\_rc|1  
GCAGTATGAATCCAAATCAGTAGGAAATGTGGCTCCATCAGCTTCTGAAGAAATCTACT  
>HPV48\_Gamma\_9628542\_nt0101\_Genome\_Tile\_rc|1  
AAGCTTATGTTAAAATATTTGCAGTATGAATCCAAATCAGTAGGAAATGTGGCTCCATC  
>HPV48\_Gamma\_9628542\_nt0121\_Genome\_Tile\_rc|1  
ACTTAAGAACTAAGTCAAAAAGCTTATGTTAAAATATTTGCAGTATGAATCCAAATCAG  
>HPV48\_Gamma\_9628542\_nt0141\_Genome\_Tile\_rc|1  
AGAAAATTTACAAAAGATACACTTAAGAACTAAGTCAAAAAGCTTATGTTAAAATATTT  
>HPV48\_Gamma\_9628542\_nt0161\_Genome\_Tile\_rc|1  
GCAAGATCAACAATAGATACAGAAAATTTACAAAAGATACACTTAAGAACTAAGTCAAAA  
>HPV48\_Gamma\_9628542\_nt0181\_Genome\_Tile\_rc|1  
GTCGTTTGTATGAAAAGAAGCAAGATCAACAATAGATACAGAAAATTTACAAAAGATAC  
>HPV48\_Gamma\_9628542\_nt0201\_Genome\_Tile\_rc|1  
ATCTCTCCAAATTACAGACAGTCGTTTGTATGAAAAGAAGCAAGATCAACAATAGATAC  
>HPV48\_Gamma\_9628542\_nt0221\_Genome\_Tile\_rc|1

CAACATGCAAATGGTGTATTATCTCTCCAAATTACAGACAGTCGTTTGTATGAAAAGAA  
>HPV48\_Gamma\_9628542\_nt0241\_Genome\_Tile\_rc|1  
TTAATCTTAAACATTTAGTACAACATGCAAATGGTGTATTATCTCTCCAAATTACAGACA  
>HPV48\_Gamma\_9628542\_nt0261\_Genome\_Tile\_rc|1  
ATCTTTTTTCATATAATGCAGTTAATCTTAAACATTTAGTACAACATGCAAATGGTGTATT  
>HPV48\_Gamma\_9628542\_nt0281\_Genome\_Tile\_rc|1  
GCAGTACAGACAAAAAATTATCTTTTTTCATATAATGCAGTTAATCTTAAACATTTAGTA  
>HPV48\_Gamma\_9628542\_nt0301\_Genome\_Tile\_rc|1  
CAGTTAAACAAATGACTTTTTTGACGTACAGACAAAAAATTATCTTTTTTCATATAATGCAG  
>HPV48\_Gamma\_9628542\_nt0361\_Genome\_Tile\_rc|1  
AAAATGAATAACAATGTTGGCACCTAATATTAATATCTGACAATTCTTTTTTAACTAAAC  
>HPV48\_Gamma\_9628542\_nt0461\_Genome\_Tile\_rc|1  
TCATGGCTGATACAATTTCTACAAACACCTCTCCAAGTCCCGCAATTAACAGAAAATCA  
>HPV48\_Gamma\_9628542\_nt0541\_Genome\_Tile\_rc|1  
CAATGACTCGTCAGAAATTAAGTTAGCAGGCAAAACAAGCTCTTCTAACTCTATGTCAGG  
>HPV48\_Gamma\_9628542\_nt0561\_Genome\_Tile\_rc|1  
TCTGCAGTAGCATCTGGTGACAATGACTCGTCAGAAATTAAGTTAGCAGGCAAAACAAGC  
>HPV48\_Gamma\_9628542\_nt0581\_Genome\_Tile\_rc|1  
GGTACGGACAAAACCTCCTCTGCAGTAGCATCTGGTGACAATGACTCGTCAGAAATTA  
>HPV48\_Gamma\_9628542\_nt0661\_Genome\_Tile\_rc|1  
AAAACAACGTATTCCAAATTCAGTTGCAGCGACTGTCACCCTTATGCGACAGCCACAATT  
>HPV48\_Gamma\_9628542\_nt0681\_Genome\_Tile\_rc|1  
TCTTTTCAGTAACAGTTGCTCAAAACAACGTATTCCAAATTCAGTTGCAGCGACTGTCACC  
>HPV48\_Gamma\_9628542\_nt0701\_Genome\_Tile\_rc|1  
CAGGACAAAAATAACAAAGCTCTTTCAGTAACAGTTGCTCAAAACAACGTATTCCAAATT  
>HPV48\_Gamma\_9628542\_nt0741\_Genome\_Tile\_rc|1  
CTTTATGATCTGCCATTGCGGGGAAGTTGTCTGGAGCACGCAGGACAAAAATAACAAAGC  
>HPV48\_Gamma\_9628542\_nt0781\_Genome\_Tile\_rc|1  
GACCCATCTAAACATCATTATGATCAATATTATCAGTACCTTTATGATCTGCCATTGCG  
>HPV48\_Gamma\_9628542\_nt0801\_Genome\_Tile\_rc|1  
CTTCAGTTATTAAACACCAAGACCCATCTAAACATCATTATGATCAATATTATCAGTAC  
>HPV48\_Gamma\_9628542\_nt0821\_Genome\_Tile\_rc|1  
CGTATCGTCCTCACATTCAGCTTCAGTTATTAAACACCAAGACCCATCTAAACATCATT  
>HPV48\_Gamma\_9628542\_nt0841\_Genome\_Tile\_rc|1  
TCCTCAAACAAATCCACTAACGTATCGTCCTCACATTCAGCTTCAGTTATTAAACACCAA  
>HPV48\_Gamma\_9628542\_nt0861\_Genome\_Tile\_rc|1  
CTACAGAGTCATTTGTGCTCTCCTCAAACAAATCCACTAACGTATCGTCCTCACATTCAG  
>HPV48\_Gamma\_9628542\_nt0881\_Genome\_Tile\_rc|1  
ATCGTCTAACAGATTGAAACTACAGAGTCATTTGTGCTCTCCTCAAACAAATCCACTAA  
>HPV48\_Gamma\_9628542\_nt0901\_Genome\_Tile\_rc|1  
CCCTGAATTATACTTTCGGAATCGTCTAACAGATTCGAAACTACAGAGTCATTTGTGCTC  
>HPV48\_Gamma\_9628542\_nt0921\_Genome\_Tile\_rc|1  
GGTCACTTTCCTCAGAATTCCCCTGAATTATACTTTCGGAATCGTCTAACAGATTCGAAA  
>HPV48\_Gamma\_9628542\_nt0941\_Genome\_Tile\_rc|1  
TTTTAGCTCCTGAATACAGCGGTCACTTTCCTCAGAATTCCCCTGAATTATACTTTCGGA  
>HPV48\_Gamma\_9628542\_nt0961\_Genome\_Tile\_rc|1  
GGAGTAACATTTAACTTTCTTTTAGCTCCTGAATACAGCGGTCACTTTCCTCAGAATTC  
>HPV48\_Gamma\_9628542\_nt0981\_Genome\_Tile\_rc|1  
GCTCTGAGATCTGTTTTTCAGGAGTAACATTTAACTTTCTTTTAGCTCCTGAATACAGC  
>HPV48\_Gamma\_9628542\_nt1001\_Genome\_Tile\_rc|1  
TGCCGATAACCGCGGACTTAGCTCTGAGATCTGTTTTTCAGGAGTAACATTTAACTTTCT  
>HPV48\_Gamma\_9628542\_nt1021\_Genome\_Tile\_rc|1  
CTCTCAGGCGTTATATGCACTGCCGATAACCGCGGACTTAGCTCTGAGATCTGTTTTTCA  
>HPV48\_Gamma\_9628542\_nt1041\_Genome\_Tile\_rc|1  
ACAGTCTCCGCTTAGATGCTCTCTCAGGCGTTATATGCACTGCCGATAACCGCGGACTTA

>HPV48\_Gamma\_9628542\_nt1061\_Genome\_Tile\_rc|1  
AACAACTCCACTATCATTAACAGTCTCCGCTTAGATGCTCTCTCAGGCGTTATATGCAC  
>HPV48\_Gamma\_9628542\_nt1121\_Genome\_Tile\_rc|1  
CGCGTCTTTTTGCACCAACAGTGAATCTACCTGAATAGTATTACTTTTCAGCTTCATCTTC  
>HPV48\_Gamma\_9628542\_nt1181\_Genome\_Tile\_rc|1  
TCTGATATTATTACTACGCAAATAGAATTAAGTTCACACTCAGCGCCATTTTGATTTCC  
>HPV48\_Gamma\_9628542\_nt1201\_Genome\_Tile\_rc|1  
AATTTGCAAAGTACAGTAGCTCTGATATTATTACTACGCAAATAGAATTAAGTTCACAC  
>HPV48\_Gamma\_9628542\_nt1221\_Genome\_Tile\_rc|1  
AAACCCCAAAATTTATCTTTAAATTTGCAAAGTACAGTAGCTCTGATATTATTACTACGCA  
>HPV48\_Gamma\_9628542\_nt1261\_Genome\_Tile\_rc|1  
GTCTTATCACTTTTAAACTTCTTGTAAGCTCATTAATGAAACCCCAAAATTTATCTTTA  
>HPV48\_Gamma\_9628542\_nt1301\_Genome\_Tile\_rc|1  
TCTAATACCTATTGCTGTTATTACCCAATTTGGTGTACATGTCTTATCACTTTTAAACT  
>HPV48\_Gamma\_9628542\_nt1321\_Genome\_Tile\_rc|1  
CAAGCATCTCGTAAATCTTCTCTAATACCTATTGCTGTTATTACCCAATTTGGTGTACAT  
>HPV48\_Gamma\_9628542\_nt1341\_Genome\_Tile\_rc|1  
GTTGCTGTAATAAACTTTACAAGCATCTCGTAAATCTTCTCTAATACCTATTGCTGTTA  
>HPV48\_Gamma\_9628542\_nt1361\_Genome\_Tile\_rc|1  
CATTTCTAAAACTCAACATGTTGCTGTAATAAACTTTACAAGCATCTCGTAAATCTTC  
>HPV48\_Gamma\_9628542\_nt1381\_Genome\_Tile\_rc|1  
ACAGAAAAATCATTGCAAATCATTTCTAAAACTCAACATGTTGCTGTAATAAACTTTA  
>HPV48\_Gamma\_9628542\_nt1401\_Genome\_Tile\_rc|1  
TAAATTCTACCAATAGTAGCACAGAAAAATCATTGCAAATCATTTCTAAAACTCAACAT  
>HPV48\_Gamma\_9628542\_nt1421\_Genome\_Tile\_rc|1  
TTCTCTATTTTTAGTTACCTTAAATTCTACCAATAGTAGCACAGAAAAATCATTGCAAAT  
>HPV48\_Gamma\_9628542\_nt1441\_Genome\_Tile\_rc|1  
CACATTAACTTTAAACCGTTTCTCTATTTTTAGTTACCTTAAATTCTACCAATAGTAGC  
>HPV48\_Gamma\_9628542\_nt1461\_Genome\_Tile\_rc|1  
CTTTAGCATTTAACATACTACACATTAACTTTAAACCGTTTCTCTATTTTTAGTTACCT  
>HPV48\_Gamma\_9628542\_nt1481\_Genome\_Tile\_rc|1  
TTCACACAAAATTTGTTCTTCTTTAGCATTTAACATACTACACATTAACTTTAAACCGT  
>HPV48\_Gamma\_9628542\_nt1501\_Genome\_Tile\_rc|1  
GTACTTTTCAATTTTGGCGGTTACACAAAAATTTGTTCTTCTTTAGCATTTAACATACTA  
>HPV48\_Gamma\_9628542\_nt1521\_Genome\_Tile\_rc|1  
AGAAATATAAAGCTGCAGCTGTACTTTTCAATTTTGGCGGTTACACAAAAATTTGTTCTT  
>HPV48\_Gamma\_9628542\_nt1541\_Genome\_Tile\_rc|1  
ATCAGTTATAATCTTCTTATAGAAATATAAAGCTGCAGCTGTACTTTTCAATTTTGGCGG  
>HPV48\_Gamma\_9628542\_nt1561\_Genome\_Tile\_rc|1  
GTGCCATATTTAAACATGTATCAGTTATAATCTTCTTATAGAAATATAAAGCTGCAGCT  
>HPV48\_Gamma\_9628542\_nt1581\_Genome\_Tile\_rc|1  
TACTAACCAGGAAGGCAAAGTGCCATATTTAAACATGTATCAGTTATAATCTTCTTAT  
>HPV48\_Gamma\_9628542\_nt1601\_Genome\_Tile\_rc|1  
ATGTTCTACTATAGTTAATCTACTAACCAGGAAGGCAAAGTGCCATATTTAAACATGT  
>HPV48\_Gamma\_9628542\_nt1641\_Genome\_Tile\_rc|1  
CCATTTTCAGATAATGAAAATGTGTCTGTCTGAAGCTAACTGATGTTCTACTATAGTTAATC  
>HPV48\_Gamma\_9628542\_nt1721\_Genome\_Tile\_rc|1  
TGTATTTTCTGTGGCATAACATGCATAATTATAAGCAACAGATGCTTCTTCAGTAAATC  
>HPV48\_Gamma\_9628542\_nt1921\_Genome\_Tile\_rc|1  
AAAAAGTTTACTCCCTGATATTTTAAAACTGTACAATTTCTTTCCACTCTTCACCAATA  
>HPV48\_Gamma\_9628542\_nt1961\_Genome\_Tile\_rc|1  
AGTGCATTTAAAAAATTGTTTTAAAGCTATTAAAAATTCTAAAAAGTTTACTCCCTGATA  
>HPV48\_Gamma\_9628542\_nt2081\_Genome\_Tile\_rc|1  
CTGACTCGATTTGTTAATATAAGATACAACTTGACCTTTCAAAAATTGTACTAATTTAAA  
>HPV48\_Gamma\_9628542\_nt2101\_Genome\_Tile\_rc|1

TGTAATGGCATTAACCAAACTGACTCGATTGTGTTAATATAAGATACAACCTTGACCTTTC  
>HPV48\_Gamma\_9628542\_nt2121\_Genome\_Tile\_rc|1  
ACAAACCAATTTTAGCATCTTGTAATGGCATTAACCAAACTGACTCGATTGTGTTAATAT  
>HPV48\_Gamma\_9628542\_nt2241\_Genome\_Tile\_rc|1  
GTGGAAGTTTGTCTGTTGCAGGTTTTATGTTTAATATCTAAACAAAACGTGTTACCAT  
>HPV48\_Gamma\_9628542\_nt2261\_Genome\_Tile\_rc|1  
ATTAGTAGTTATTATCATAGGTGGAAGTTTTGTCTGTTGCAGGTTTTATGTTTAATATC  
>HPV48\_Gamma\_9628542\_nt2281\_Genome\_Tile\_rc|1  
TCATCAGTTGTTACATTAACATTAGTAGTTATTATCATAGGTGGAAGTTTTGTCTGTTGC  
>HPV48\_Gamma\_9628542\_nt2301\_Genome\_Tile\_rc|1  
TTCTCAAATAAAATAGAGATTCATCAGTTGTTACATTAACATTAGTAGTTATTATCATAG  
>HPV48\_Gamma\_9628542\_nt2321\_Genome\_Tile\_rc|1  
ATTGAAACACGTAAGTCTACTTCTCAAATAAAATAGAGATTCATCAGTTGTTACATTAAC  
>HPV48\_Gamma\_9628542\_nt2341\_Genome\_Tile\_rc|1  
ATTGGTAACTTATTCGGAATTTGAAACACGTAAGTCTACTTCTCAAATAAAATAGAGAT  
>HPV48\_Gamma\_9628542\_nt2361\_Genome\_Tile\_rc|1  
AAGGTTTCATCTTTGTCAGACATTGGTAACTTATTCGGAATTTGAAACACGTAAGTCTAC  
>HPV48\_Gamma\_9628542\_nt2381\_Genome\_Tile\_rc|1  
TTTGTCTAGAAATGGTAAACAAAGGTTTCATCTTTGTCAGACATTGGTAACTTATTCGGAAT  
>HPV48\_Gamma\_9628542\_nt2521\_Genome\_Tile\_rc|1  
CATAAGATTCTTTTCAATCAAAGTCAACTGAATTTCTTGCTGTCAGCAAAACGGGTGC  
>HPV48\_Gamma\_9628542\_nt2541\_Genome\_Tile\_rc|1  
TGCTAAATGATCTTTAAGATCATAAGATTCTTTTCAATCAAAGTCAACTGAATTTCTTG  
>HPV48\_Gamma\_9628542\_nt2561\_Genome\_Tile\_rc|1  
AATCTTACAGCTTTCCAGTATGCTAAATGATCTTTAAGATCATAAGATTCTTTTCAATC  
>HPV48\_Gamma\_9628542\_nt2581\_Genome\_Tile\_rc|1  
AATAGGCAATAACATTTTCTAATCTTACAGCTTTCCAGTATGCTAAATGATCTTTAAGAT  
>HPV48\_Gamma\_9628542\_nt2601\_Genome\_Tile\_rc|1  
AATATGTTCTTTTCTAGCATAATAGGCAATAACATTTTCTAATCTTACAGCTTTCCAGTA  
>HPV48\_Gamma\_9628542\_nt2641\_Genome\_Tile\_rc|1  
TTACAGCTAATGTTGGTAATGGCTGCAGACCTAATTTAGTAATATGTTCTTTTCTAGCAT  
>HPV48\_Gamma\_9628542\_nt2701\_Genome\_Tile\_rc|1  
ATTTCAATAAACTTTGAATAAGCAGCTGTATATTAATTGCTTCTTTTCTTATATTCAG  
>HPV48\_Gamma\_9628542\_nt2741\_Genome\_Tile\_rc|1  
CTAGTTTCTGCAAGAGTCCATCTTTCCAAAGCAAACCTCTGATTTCAATAAACTTTGAATA  
>HPV48\_Gamma\_9628542\_nt2761\_Genome\_Tile\_rc|1  
AACTGTTTATAGTTTCTGCACTAGTTTCTGCAAGAGTCCATCTTTCCAAAGCAAACCTCTG  
>HPV48\_Gamma\_9628542\_nt2781\_Genome\_Tile\_rc|1  
TTTGAAACAATTTCTGGGGGAAGTGTATAGTTTCTGCACTAGTTTCTGCAAGAGTCCA  
>HPV48\_Gamma\_9628542\_nt2801\_Genome\_Tile\_rc|1  
TTTACAATGAAAGGTACTTTTTTGAACAATTTCTGGGGGAAGTGTATAGTTTCTGCA  
>HPV48\_Gamma\_9628542\_nt2821\_Genome\_Tile\_rc|1  
CATCATTATCAAACCATACATTTACAATGAAAGGTACTTTTTTGAACAATTTCTGGGGG  
>HPV48\_Gamma\_9628542\_nt2841\_Genome\_Tile\_rc|1  
ATAAGGAAAAGAATTTCTTTCATCATTATCAAACCATACATTTACAATGAAAGGTACTTT  
>HPV48\_Gamma\_9628542\_nt2861\_Genome\_Tile\_rc|1  
TATATAAAATCCCAACAGGTATAAGGAAAAGAATTTCTTTCATCATTATCAAACCATACA  
>HPV48\_Gamma\_9628542\_nt2901\_Genome\_Tile\_rc|1  
CCCTTCAGTCTTGTGCCATTTGTTTGGTCATCTTGATAATATATAAAATCCCAACAGGT  
>HPV48\_Gamma\_9628542\_nt2921\_Genome\_Tile\_rc|1  
CATCCATTATGATCAACCAGCCCTTCAGTCTTGTGCCATTTGTTTGGTCATCTTGATAA  
>HPV48\_Gamma\_9628542\_nt2941\_Genome\_Tile\_rc|1  
CATTTAGATCTACATAATAACATCCATTATGATCAACCAGCCCTTCAGTCTTGTGCCATT  
>HPV48\_Gamma\_9628542\_nt2961\_Genome\_Tile\_rc|1  
AGTAAAGTATACAAATCACCATTTAGATCTACATAATAACATCCATTATGATCAACCAG

>HPV48\_Gamma\_9628542\_nt3101\_Genome\_Tile\_rc|1  
GTCGAGAGCCCCGACCCTGCTTTTCAGAAGAGGGATTTGTATTTCTCGAGGAGCTAGTAACA  
>HPV48\_Gamma\_9628542\_nt3121\_Genome\_Tile\_rc|1  
GGCTCTCCGAGCTGCTGGAGGTCGAGAGCCCCGACCCTGCTTTTCAGAAGAGGGATTTGTAT  
>HPV48\_Gamma\_9628542\_nt3161\_Genome\_Tile\_rc|1  
TCGGTGTTGGAGTTTTCTGAGATGCTCGGTCTCCTTCGAGGGCTCTCCGAGCTGCTGGAG  
>HPV48\_Gamma\_9628542\_nt3261\_Genome\_Tile\_rc|1  
CTTTGTTCCCTCGTCTTCTGGGTGTGGTGTTCGGTGGTTCCAGATTCTCTCGGTTCCTCGTCG  
>HPV48\_Gamma\_9628542\_nt3281\_Genome\_Tile\_rc|1  
GAGTCGGACCCCAATTTCTCTTTGTTCTTCGTCTTCTGGGTGTGGTGTTCGGTGGTTCCA  
>HPV48\_Gamma\_9628542\_nt3361\_Genome\_Tile\_rc|1  
CCTGTAATCGTCCAAGTCGTGAGTAACCGTGTCTTGCAAGCGTTGTAGATCTTGATCCCA  
>HPV48\_Gamma\_9628542\_nt3441\_Genome\_Tile\_rc|1  
TGTAGTACAGCGATTTCTCCAACATTTCAAATTATTTTGTGACCTGTAAATAACACTAA  
>HPV48\_Gamma\_9628542\_nt3461\_Genome\_Tile\_rc|1  
AAAAATAAACTAGCATATTTTGTAGTACAGCGATTTCTCCAACATTTCAAATTATTTTGT  
>HPV48\_Gamma\_9628542\_nt3481\_Genome\_Tile\_rc|1  
TCCAAACAGAGCTGAAGCATAAAAAATAAACTAGCATATTTTGTAGTACAGCGATTTCTCC  
>HPV48\_Gamma\_9628542\_nt3501\_Genome\_Tile\_rc|1  
AGAATTAGGACCAAGCCACTTCCAACAGAGCTGAAGCATAAAAAATAAACTAGCATATTT  
>HPV48\_Gamma\_9628542\_nt3521\_Genome\_Tile\_rc|1  
ACTTTTGCAGCACCCCCATCAGAATTAGGACCAAGCCACTTCCAACAGAGCTGAAGCAT  
>HPV48\_Gamma\_9628542\_nt3541\_Genome\_Tile\_rc|1  
CACTTTTAAATGCAACTAACACTTTTGCAGCACCCCCATCAGAATTAGGACCAAGCCACT  
>HPV48\_Gamma\_9628542\_nt3561\_Genome\_Tile\_rc|1  
GAACACTTGCTTTTGGGCATCACTTTTAAATGCAACTAACACTTTTGCAGCACCCCCATC  
>HPV48\_Gamma\_9628542\_nt3581\_Genome\_Tile\_rc|1  
GGAATATGAACTGTGTTTAAAGAACTTGTCTTTGGGCATCACTTTTAAATGCAACTAAC  
>HPV48\_Gamma\_9628542\_nt3641\_Genome\_Tile\_rc|1  
TCTTCTACGTAAGGACATTATAAACTGTCAAGTCTTCCCAGAGTTATAGTAGTTCCTTTA  
>HPV48\_Gamma\_9628542\_nt3661\_Genome\_Tile\_rc|1  
TCAGTAGGACTTGCTCTTTTTCTTCTACGTAAGGACATTATAAACTGTCAAGTCTTCCCA  
>HPV48\_Gamma\_9628542\_nt3681\_Genome\_Tile\_rc|1  
GCAAGCATGTTTTATAAAGATCAGTAGGACTTGCTCTTTTTCTTCTACGTAAGGACATTA  
>HPV48\_Gamma\_9628542\_nt3701\_Genome\_Tile\_rc|1  
AGGAATGCAGTCCCCCCTTGCAAGCATGTTTTATAAAGATCAGTAGGACTTGCTCTTTT  
>HPV48\_Gamma\_9628542\_nt3821\_Genome\_Tile\_rc|1  
AAATGATCCCCCAGACCCTTTTCCAGATCCTATTCCCAAATTTCCAAAATATACCAAAC  
>HPV48\_Gamma\_9628542\_nt3841\_Genome\_Tile\_rc|1  
GATCCTAATGGTCTATATCCAAATGATCCCCCAGACCCTTTTCCAGATCCTATTCCCAAA  
>HPV48\_Gamma\_9628542\_nt3861\_Genome\_Tile\_rc|1  
CTGGTCTTCCACTTCCTGCGGATCCTAATGGTCTATATCCAAATGATCCCCCAGACCCTT  
>HPV48\_Gamma\_9628542\_nt3881\_Genome\_Tile\_rc|1  
AGTCACTGGTAAGTCTGTGGCTGGTCTTCCACTTCCTGCGGATCCTAATGGTCTATATCC  
>HPV48\_Gamma\_9628542\_nt3901\_Genome\_Tile\_rc|1  
TCTATCACAACATTAGGTCTAGTCACTGGTAAGTCTGTGGCTGGTCTTCCACTTCCTGCG  
>HPV48\_Gamma\_9628542\_nt3921\_Genome\_Tile\_rc|1  
TACTTTGAGGACCTATAGGTCTATCACAACATTAGGTCTAGTCACTGGTAAGTCTGTGG  
>HPV48\_Gamma\_9628542\_nt3941\_Genome\_Tile\_rc|1  
TCCAGGATCAATGGGTACTATACTTTGAGGACCTATAGGTCTATCACAACATTAGGTCT  
>HPV48\_Gamma\_9628542\_nt3961\_Genome\_Tile\_rc|1  
AGAGGGACTATAGATGACGCTCCAGGATCAATGGGTACTATACTTTGAGGACCTATAGGT  
>HPV48\_Gamma\_9628542\_nt3981\_Genome\_Tile\_rc|1  
TATCAGGCCCTCCCTCAACAAGAGGGACTATAGATGACGCTCCAGGATCAATGGGTACTA  
>HPV48\_Gamma\_9628542\_nt4001\_Genome\_Tile\_rc|1

ATCTGGTGCAATAAAAGATATATCAGGCCCTCCCTCAACAAGAGGGACTATAGATGACGC  
>HPV48\_Gamma\_9628542\_nt4021\_Genome\_Tile\_rc|1  
CCTCCTATACCTGGACCTGCATCTGGTGCAATAAAAGATATATCAGGCCCTCCCTCAACA  
>HPV48\_Gamma\_9628542\_nt4041\_Genome\_Tile\_rc|1  
TGAATAGTTCAATATCCTCACCTCCTATACCTGGACCTGCATCTGGTGCAATAAAAGATA  
>HPV48\_Gamma\_9628542\_nt4081\_Genome\_Tile\_rc|1  
CCACTAACACCACCTACATCAGTTGCTGGATCTCTAAAGGTGAATAGTTCAATATCCTCA  
>HPV48\_Gamma\_9628542\_nt4101\_Genome\_Tile\_rc|1  
TAGAAATAGTAGTAGGACCTCCACTAACACCACCTACATCAGTTGCTGGATCTCTAAAGG  
>HPV48\_Gamma\_9628542\_nt4161\_Genome\_Tile\_rc|1  
ACTGTTTGGGAGTTGTGGCACTTGGTAAAGCATCTATTATAGCTGTCTCACTTTCTTCTG  
>HPV48\_Gamma\_9628542\_nt4181\_Genome\_Tile\_rc|1  
TGTATAAGAATCATAAAACAACCTGTTTGGGAGTTGTGGCACTTGGTAAAGCATCTATTAT  
>HPV48\_Gamma\_9628542\_nt4201\_Genome\_Tile\_rc|1  
TGTGTTTGCAAGATAGTTTGTGTATAAGAATCATAAAACAACCTGTTTGGGAGTTGTGGCA  
>HPV48\_Gamma\_9628542\_nt4221\_Genome\_Tile\_rc|1  
TATTTAAAAATGGGTTTACCTGTGTTTGCAAGATAGTTTGTGTATAAGAATCATAAAACA  
>HPV48\_Gamma\_9628542\_nt4241\_Genome\_Tile\_rc|1  
ATTAGTATCACTAATAGCATTATTTAAAAATGGGTTTACCTGTGTTTGCAGATAGTTTG  
>HPV48\_Gamma\_9628542\_nt4261\_Genome\_Tile\_rc|1  
AATAATGGATCTACAAACACATTAGTATCACTAATAGCATTATTTAAAAATGGGTTTACC  
>HPV48\_Gamma\_9628542\_nt4281\_Genome\_Tile\_rc|1  
CCCCAATTGTCTCTCCTGCAAATAATGGATCTACAAACACATTAGTATCACTAATAGCAT  
>HPV48\_Gamma\_9628542\_nt4301\_Genome\_Tile\_rc|1  
TATCTCTTCAAATATGTTGTCCCAATTGTCTCTCCTGCAAATAATGGATCTACAAACAC  
>HPV48\_Gamma\_9628542\_nt4321\_Genome\_Tile\_rc|1  
AAATTTAAATTTCTGCAAGGGTATCTCTTCAAATATGTTGTCCCAATTGTCTCTCCTGCA  
>HPV48\_Gamma\_9628542\_nt4341\_Genome\_Tile\_rc|1  
TACTTTCCCGCGGAAAACCTGAAATTTAAATTTCTGCAAGGGTATCTCTCAAATATGTTGT  
>HPV48\_Gamma\_9628542\_nt4381\_Genome\_Tile\_rc|1  
TGAGCTGGTGTTCGTAAACCCCTCCCAGGTTTAAACAGGTGTACTTTCCCGCGGAAAACCTG  
>HPV48\_Gamma\_9628542\_nt4401\_Genome\_Tile\_rc|1  
TAAATCTACTGTAAGATCTTTGAGCTGGTGTTCGTAAACCCCTCCCAGGTTTAAACAGGTG  
>HPV48\_Gamma\_9628542\_nt4421\_Genome\_Tile\_rc|1  
TTGGATTGGGTACTGTTCCATAAATCTACTGTAAGATCTTTGAGCTGGTGTTCGTAAACC  
>HPV48\_Gamma\_9628542\_nt4441\_Genome\_Tile\_rc|1  
TGACTAAGAAATTCCGGAGCTTGGATTGGGTACTGTTCCATAAATCTACTGTAAGATCTT  
>HPV48\_Gamma\_9628542\_nt4461\_Genome\_Tile\_rc|1  
ACTGCACCAATCGAGAAGGCTGACTAAGAAATTCGGAGCTTGGATTGGGTACTGTTCCA  
>HPV48\_Gamma\_9628542\_nt4521\_Genome\_Tile\_rc|1  
TTACATCACGCTGGAACCTGTATACTAATATCTGGATCAAAGCGGGGATTTTCAAACCTCAA  
>HPV48\_Gamma\_9628542\_nt4541\_Genome\_Tile\_rc|1  
TGGCGCAGCCTCTAGGCTATTTACATCACGCTGGAACCTGTATACTAATATCTGGATCAAA  
>HPV48\_Gamma\_9628542\_nt4561\_Genome\_Tile\_rc|1  
ATGTCAGCAAAAGCTGGATTTGGCGCAGCCTCTAGGCTATTTACATCACGCTGGAACCTGT  
>HPV48\_Gamma\_9628542\_nt4581\_Genome\_Tile\_rc|1  
GCGGCCTACTTAAATAAGCAATGTCAGCAAAAGCTGGATTTGGCGCAGCCTCTAGGCTAT  
>HPV48\_Gamma\_9628542\_nt4601\_Genome\_Tile\_rc|1  
TTCTGATGTAGCAGACATGTGCGGCCTACTTAAATAAGCAATGTCAGCAAAAGCTGGATT  
>HPV48\_Gamma\_9628542\_nt4621\_Genome\_Tile\_rc|1  
CTGCTGACTCTGACTAATCCTTCTGATGTAGCAGACATGTGCGGCCTACTTAAATAAGCA  
>HPV48\_Gamma\_9628542\_nt4641\_Genome\_Tile\_rc|1  
ATACTGCTCGAGATCCAATTCTGCTGACTCTGACTAATCCTTCTGATGTAGCAGACATGT  
>HPV48\_Gamma\_9628542\_nt4661\_Genome\_Tile\_rc|1  
TAATCCACTCCTGGTTTGTAATACTGCTCGAGATCCAATTCTGCTGACTCTGACTAATCC



>HPV48\_Gamma\_9628542\_nt4681\_Genome\_Tile\_rc|1  
TGTACTTTAGGGCCTATAGTTAATCCACTCCTGGTTTGTAACTGCTCGAGATCCAATT  
>HPV48\_Gamma\_9628542\_nt4701\_Genome\_Tile\_rc|1  
CAGACAAATCCATATAATAATGTACTTTAGGGCCTATAGTTAATCCACTCCTGGTTTGTAA  
>HPV48\_Gamma\_9628542\_nt4721\_Genome\_Tile\_rc|1  
TATAGCTTCTGTTGATATTGCAGACAAATCCATATAATAATGTACTTTAGGGCCTATAGT  
>HPV48\_Gamma\_9628542\_nt4741\_Genome\_Tile\_rc|1  
TCTGCAAAGGTTTGCAATTCTATAGCTTCTGTTGATATTGCAGACAAATCCATATAATAA  
>HPV48\_Gamma\_9628542\_nt4761\_Genome\_Tile\_rc|1  
TTGTGTGAACATGTCCAGAATCTGCAAAGGTTTGCAATTCTATAGCTTCTGTTGATATTG  
>HPV48\_Gamma\_9628542\_nt4781\_Genome\_Tile\_rc|1  
TGATAAGAAATCATCAACTATTGTGTGAACATGTCCAGAATCTGCAAAGGTTTGCAATTC  
>HPV48\_Gamma\_9628542\_nt4801\_Genome\_Tile\_rc|1  
GGATCATCTAAAGCAGTAACTGATAAGAAATCATCAACTATTGTGTGAACATGTCCAGAA  
>HPV48\_Gamma\_9628542\_nt4821\_Genome\_Tile\_rc|1  
TTATATCAGCTATATTTGCTGGATCATCTAAAGCAGTAACTGATAAGAAATCATCAACTA  
>HPV48\_Gamma\_9628542\_nt4921\_Genome\_Tile\_rc|1  
AGAGCAACTGTTTCTCCTTCCTCATCAACCCCTTGTACTGTAATATGTGAATTATTAAAG  
>HPV48\_Gamma\_9628542\_nt4941\_Genome\_Tile\_rc|1  
TAGTAATTGAAGGAATTGGAAGAGCAACTGTTTCTCCTTCCTCATCAACCCCTTGTACTG  
>HPV48\_Gamma\_9628542\_nt4961\_Genome\_Tile\_rc|1  
AACAAAAGTTTTGGAAGAATTAGTAATTGAAGGAATTGGAAGAGCAACTGTTTCTCCTTC  
>HPV48\_Gamma\_9628542\_nt5001\_Genome\_Tile\_rc|1  
CTGTATCATTTGCAAACAGACCATTTTCTGCAATGTCTGTAACAAAAGTTTTGGAAGAAT  
>HPV48\_Gamma\_9628542\_nt5021\_Genome\_Tile\_rc|1  
TGCTGGGGTTAAAAGACTATCTGTATCATTTGCAAACAGACCATTTTCTGCAATGTCTGT  
>HPV48\_Gamma\_9628542\_nt5041\_Genome\_Tile\_rc|1  
ATAGCAGGTACAATAGTGCTTGCTGGGGTTAAAAGACTATCTGTATCATTTGCAAACAGA  
>HPV48\_Gamma\_9628542\_nt5061\_Genome\_Tile\_rc|1  
CAAATAAAGGGAACCAATTAATAGCAGGTACAATAGTGCTTGCTGGGGTTAAAAGACTAT  
>HPV48\_Gamma\_9628542\_nt5081\_Genome\_Tile\_rc|1  
AGCAAAGTCTGAGTAACTATCAAATAAAGGGAACCAATTAATAGCAGGTACAATAGTGCT  
>HPV48\_Gamma\_9628542\_nt5101\_Genome\_Tile\_rc|1  
GGAATAAAAAAGGGATCTAAAGCAAAGTCTGAGTAACTATCAAATAAAGGGAACCAATTA  
>HPV48\_Gamma\_9628542\_nt5121\_Genome\_Tile\_rc|1  
CTAAGCGTCGTTTCTTACGTGGAATAAAAAAGGGATCTAAAGCAAAGTCTGAGTAACTAT  
>HPV48\_Gamma\_9628542\_nt5141\_Genome\_Tile\_rc|1  
TGAAAAACATTAAAGGATATCTAAGCGTCGTTTCTTACGTGGAATAAAAAAGGGATCTAA  
>HPV48\_Gamma\_9628542\_nt5161\_Genome\_Tile\_rc|1  
CTGCAGACCACAGAGCCATCTGAAAAACATTAAAGGATATCTAAGCGTCGTTTCTTACGT  
>HPV48\_Gamma\_9628542\_nt5261\_Genome\_Tile\_rc|1  
GTGCTTGATATAAAAATATACATCCGTTTCTTGCACGTATTCATCAGTGCGCAACACACGA  
>HPV48\_Gamma\_9628542\_nt5281\_Genome\_Tile\_rc|1  
CAACTATTAAAAGTCTTTCAGTGCTTGATATAAAAATATACATCCGTTTCTTGCACGTATT  
>HPV48\_Gamma\_9628542\_nt5301\_Genome\_Tile\_rc|1  
AACATCAAAATAAGGATTACCAACTATTAAAAGTCTTTCAGTGCTTGATATAAAAATATAC  
>HPV48\_Gamma\_9628542\_nt5321\_Genome\_Tile\_rc|1  
GTTATAGTGCTCTGTGTTTTCAACATCAAAATAAGGATTACCAACTATTAAAAGTCTTTCA  
>HPV48\_Gamma\_9628542\_nt5341\_Genome\_Tile\_rc|1  
TAGCAGAACTTTAGGTACTGTTATAGTGCTCTGTGTTTTCAACATCAAAATAAGGATTAC  
>HPV48\_Gamma\_9628542\_nt5461\_Genome\_Tile\_rc|1  
CTACTTCCAAACCAACAAGTTTCCAAACTAAACGTTTCCTTATCTGAATTATATAAATTTT  
>HPV48\_Gamma\_9628542\_nt5481\_Genome\_Tile\_rc|1  
GCCAAGAGGACCCCTCTGCCTACTTCCAAACCAACAAGTTTCCAAACTAAACGTTTCCTT  
>HPV48\_Gamma\_9628542\_nt5501\_Genome\_Tile\_rc|1

GGATGACCTGTAGATCCTACGCCAAGAGGACCCCCTCTGCCTACTTCCAAACCAACAAGT  
>HPV48\_Gamma\_9628542\_nt5521\_Genome\_Tile\_rc|1  
CCCCTATCTTATTTAGTAAAGGATGACCTGTAGATCCTACGCCAAGAGGACCCCCTCTGC  
>HPV48\_Gamma\_9628542\_nt5641\_Genome\_Tile\_rc|1  
ATTCTCCAGTGGCTGGAGCACAACTATTTAGTATCTGACTCTGCTTAGGATCCATGG  
>HPV48\_Gamma\_9628542\_nt5661\_Genome\_Tile\_rc|1  
TGGTTTAGCTAAATCCCAGTATTCTCCAGTGGCTGGAGCACAACTATTTAGTATCTG  
>HPV48\_Gamma\_9628542\_nt5681\_Genome\_Tile\_rc|1  
CCGTTTTCCAAATCATTGCATGGTTTAGCTAAATCCCAGTATTCTCCAGTGGCTGGAGCA  
>HPV48\_Gamma\_9628542\_nt5701\_Genome\_Tile\_rc|1  
GTTGAATTGGTGGTGCAGCCCCGTTTTCCAAATCATTGCATGGTTTAGCTAAATCCCAGT  
>HPV48\_Gamma\_9628542\_nt5721\_Genome\_Tile\_rc|1  
CTGAATAACAGTATTAAGTAGTTGAATTGGTGGTGCAGCCCCGTTTTCCAAATCATTGCA  
>HPV48\_Gamma\_9628542\_nt5801\_Genome\_Tile\_rc|1  
TCTAGAGGGACGCCAGCACGATCCTGCATCAACTTAGGAAAATTAGCAGCCCCAAAGCCT  
>HPV48\_Gamma\_9628542\_nt5821\_Genome\_Tile\_rc|1  
TACTAATAGAATCTATTAAGTCTAGAGGGACGCCAGCACGATCCTGCATCAACTTAGGAA  
>HPV48\_Gamma\_9628542\_nt5881\_Genome\_Tile\_rc|1  
CAAAAAAGAAGACAGAGTCTCCATAAATATCTTTGGTCATCTTTAAAAAATCTGGCCATA  
>HPV48\_Gamma\_9628542\_nt5901\_Genome\_Tile\_rc|1  
ATAACATTGTTCCCGTTTTACCAAAAAAGAAGACAGAGTCTCCATAAATATCTTTGGTCAT  
>HPV48\_Gamma\_9628542\_nt5921\_Genome\_Tile\_rc|1  
CTTGCAAAAAAGATGACGAGCATAACATTGTTCCCGTTTTACCAAAAAAGAAGACAGAGTCT  
>HPV48\_Gamma\_9628542\_nt5961\_Genome\_Tile\_rc|1  
TCCATTTTCTGTTGGTATAGGCTCCCCCATTTGGCCAGCTCTTGCAAAAAAGATGACGAGC  
>HPV48\_Gamma\_9628542\_nt6001\_Genome\_Tile\_rc|1  
TGTTGTTTTGATCGGCAGAATCAGGAGTTATATAATATACTCCATTTTCTGTTGGTATAG  
>HPV48\_Gamma\_9628542\_nt6021\_Genome\_Tile\_rc|1  
AGATCCTAAATGAGAAGATCTGTTGTTTTGATCGGCAGAATCAGGAGTTATATAATATAC  
>HPV48\_Gamma\_9628542\_nt6041\_Genome\_Tile\_rc|1  
GGTGTGTGTAATAACACAGAAGATCCTAAATGAGAAGATCTGTTGTTTTGATCGGCAGAA  
>HPV48\_Gamma\_9628542\_nt6061\_Genome\_Tile\_rc|1  
TAGTATTCAAGGATCCACTTGGTGTGTGTAATAACACAGAAGATCCTAAATGAGAAGATC  
>HPV48\_Gamma\_9628542\_nt6181\_Genome\_Tile\_rc|1  
AATTCACATTATGAGTATTATCAAAAACGTAAATAACAGCTCATTTCCTCAACAAATGC  
>HPV48\_Gamma\_9628542\_nt6201\_Genome\_Tile\_rc|1  
ATTCTTAACACTAATAGTAAATTCACATTATGAGTATTATCAAAAACGTAAATAACAG  
>HPV48\_Gamma\_9628542\_nt6221\_Genome\_Tile\_rc|1  
TCAGTTAATGCAGTTTTATCATTCTTAACACTAATAGTAAATTCACATTATGAGTATTA  
>HPV48\_Gamma\_9628542\_nt6241\_Genome\_Tile\_rc|1  
AACCATTATCTATGTAGTTTTAGTTAATGCAGTTTTATCATTCTTAACACTAATAGTAA  
>HPV48\_Gamma\_9628542\_nt6261\_Genome\_Tile\_rc|1  
ATCTGCATTATTATATTTGTAACCATTATCTATGTAGTTTTAGTTAATGCAGTTTTATC  
>HPV48\_Gamma\_9628542\_nt6281\_Genome\_Tile\_rc|1  
TGTCGAAGATATTGTTTAAATCTGCATTATTATATTTGTAACCATTATCTATGTAGTTT  
>HPV48\_Gamma\_9628542\_nt6301\_Genome\_Tile\_rc|1  
CTATTTTCATATTCTTCTGTATGTCGAAGATATTGTTTAAATCTGCATTATTATATTTGT  
>HPV48\_Gamma\_9628542\_nt6321\_Genome\_Tile\_rc|1  
GCATAACTGAAAAACCAACTCTATTTCATATTCTTCTGTATGTCGAAGATATTGTTTAA  
>HPV48\_Gamma\_9628542\_nt6361\_Genome\_Tile\_rc|1  
CGTGTAATGTGCCAGAACATCTGCAGTCAAGTTCACTTTGCATAACTGAAAAACCAACT  
>HPV48\_Gamma\_9628542\_nt6461\_Genome\_Tile\_rc|1  
GTAGCCATGGATTGATATACCTGTAAAGTATCTTCAATGCCCGTTGGAGCTGGTGAACA  
>HPV48\_Gamma\_9628542\_nt6481\_Genome\_Tile\_rc|1  
GTTTCAGCAGTAGGGCATTTAGTAGCCATGGATTTGATATACCTGTAAAGTATCTTCAATGC

>HPV48\_Gamma\_9628542\_nt6501\_Genome\_Tile\_rc|1  
TGGATCTGTGTCTTCTTCTGTTTCAGCAGTAGGGCATTTAGTAGCCATGGATTTGATATA  
>HPV48\_Gamma\_9628542\_nt6521\_Genome\_Tile\_rc|1  
CAGAAACTGTAAGCTTTGTATGGATCTGTGTCTTCTTCTGTTTCAGCAGTAGGGCATTTA  
>HPV48\_Gamma\_9628542\_nt6541\_Genome\_Tile\_rc|1  
GCTCTGTCATATCTAAAGTCCAGAACTGTAAGCTTTGTATGGATCTGTGTCTTCTTCTG  
>HPV48\_Gamma\_9628542\_nt6561\_Genome\_Tile\_rc|1  
ACTTAAATCAGACGAGAAGCGCTCTGTCATATCTAAAGTCCAGAACTGTAAGCTTTGTA  
>HPV48\_Gamma\_9628542\_nt6581\_Genome\_Tile\_rc|1  
TTTCGACCCAAGGAAAAGTGAAGTAAATCAGACGAGAAGCGCTCTGTCATATCTAAAGTC  
>HPV48\_Gamma\_9628542\_nt6601\_Genome\_Tile\_rc|1  
AACCAGTTTGATATAAAAATTTTCGACCCAAGGAAAAGTGAAGTAAATCAGACGAGAAGC  
>HPV48\_Gamma\_9628542\_nt6621\_Genome\_Tile\_rc|1  
AGCTCGTTTACCATTTAACAAACCAGTTTGATATAAAAATTTTCGACCCAAGGAAAAGTGA  
>HPV48\_Gamma\_9628542\_nt6641\_Genome\_Tile\_rc|1  
GCAGCTGTATAGTCTGTTCTAGCTCGTTTACCATTTAACAAACCAGTTTGATATAAAAAT  
>HPV48\_Gamma\_9628542\_nt6661\_Genome\_Tile\_rc|1  
TAGATCTGGTACTAGATCCTGCAGCTGTATAGTCTGTTCTAGCTCGTTTACCATTTAACA  
>HPV48\_Gamma\_9628542\_nt6681\_Genome\_Tile\_rc|1  
TCTTACTCTCTACGCTTTGTAGATCTGGTACTAGATCCTGCAGCTGTATAGTCTGTTCT  
>HPV48\_Gamma\_9628542\_nt6701\_Genome\_Tile\_rc|1  
AACATTCTACATCTTTACTATCTTACTCTCCTACGCTTTGTAGATCTGGTACTAGATCCT  
>HPV48\_Gamma\_9628542\_nt6721\_Genome\_Tile\_rc|1  
TTCACAGTATTAATAATGTAAACATTCTACATCTTTACTATCTTACTCTCCTACGCTTTG  
>HPV48\_Gamma\_9628542\_nt6801\_Genome\_Tile\_rc|1  
GTCAGAACCCACCAATGGAGGCGTATAAATGACACCACGGTAAAATATTCACAGTGTTT  
>HPV48\_Gamma\_9628542\_nt6861\_Genome\_Tile\_rc|1  
CTGAATCGTCTGCTGCTCCTCAGCGTCTGCTGACCAAATGACTGACCCAGGAGTTTATAG  
>HPV48\_Gamma\_9628542\_nt7001\_Genome\_Tile\_rc|1  
CTGTTTTAAGATATCTTGTGATCTCTGTCTGAAGTTGTAAAAGTTGGCAGTACATTTTA  
>HPV48\_Gamma\_9628542\_nt7021\_Genome\_Tile\_rc|1  
GTACAGTACCGCTTTAGGTACTGTTTTAAGATATCTTGTGATCTCTGTCTGAAGTTGTA  
>HPV24\_Unclassified\_9628486\_nt0101\_Genome\_Tile\_rc|1  
ATTCACAGTGATACGGAAACGGTGCATGAAAATACTTGTAGGTAATGAAAGTAGTTGCT  
>HPV24\_Unclassified\_9628486\_nt0121\_Genome\_Tile\_rc|1  
TATGTCTAATCAATAAATACATTACAGTGATACGGAAACGGTGCATGAAAATACTTGT  
>HPV24\_Unclassified\_9628486\_nt0141\_Genome\_Tile\_rc|1  
TCAAGATGTCTTCCTTTTTATATGTCTAATCAATAAATACATTACAGTGATACGGAAAC  
>HPV24\_Unclassified\_9628486\_nt0161\_Genome\_Tile\_rc|1  
AGGTTTACCTGGTTGAGCCATCAAGATGTCTTCCTTTTTATATGTCTAATCAATAAATAC  
>HPV24\_Unclassified\_9628486\_nt0181\_Genome\_Tile\_rc|1  
CTAAGTTCTAACACTGACTGAGGTTTACCTGGTTGAGCCATCAAGATGTCTTCCTTTTTA  
>HPV24\_Unclassified\_9628486\_nt0221\_Genome\_Tile\_rc|1  
TGGTACAACACAATCGTCTAATGGTATATTTAATAATCTACTAAGTTCTAACACTGACTG  
>HPV24\_Unclassified\_9628486\_nt0241\_Genome\_Tile\_rc|1  
AATCTTTTGCAAAAGTTACATGGTACAACACAATCGTCTAATGGTATATTTAATAATCTA  
>HPV24\_Unclassified\_9628486\_nt0261\_Genome\_Tile\_rc|1  
TTAACTCTGTATAACTTAGAAATCTTTTGCAAAAGTTACATGGTACAACACAATCGTCTA  
>HPV24\_Unclassified\_9628486\_nt0281\_Genome\_Tile\_rc|1  
GCATTTGGTGTCAAAGTCAGTTAACTCTGTATAACTTAGAAATCTTTTGCAAAAGTTACA  
>HPV24\_Unclassified\_9628486\_nt0421\_Genome\_Tile\_rc|1  
AGAGGTGTATTTTCTTTTTGTTCTATTTCCCAACCTATCACACTCTCTACAAAATAATTT  
>HPV24\_Unclassified\_9628486\_nt0441\_Genome\_Tile\_rc|1  
ACCTTACAATAATGTCCGAAAGAGGTGTATTTTCTTTTTGTTCTATTTCCCAACCTATCA  
>HPV24\_Unclassified\_9628486\_nt0461\_Genome\_Tile\_rc|1

TAATTTTAAGCAATGGTGACACCTTACAATAATGTCCGAAAGAGGTGTATTTTCTTTTTG  
>HPV24\_Unclassified\_9628486\_nt0481\_Genome\_Tile\_rc|1  
AGCTTTTCAATTTGATTAAGTAATTTTAAGCAATGGTGACACCTTACAATAATGTCCGAA  
>HPV24\_Unclassified\_9628486\_nt0641\_Genome\_Tile\_rc|1  
CTTCACAGTGCAAATCAACAGTCTGTGGCTCAGTCAACTCTAAGACAATGTCTTGTAGAG  
>HPV24\_Unclassified\_9628486\_nt0661\_Genome\_Tile\_rc|1  
ATCCTGCTCTGGCAACTCCTCTTCACAGTGCAAATCAACAGTCTGTGGCTCAGTCAACTC  
>HPV24\_Unclassified\_9628486\_nt0821\_Genome\_Tile\_rc|1  
GGCAGTCGGGACACAAAATGACCACCTCTTCTAGCAGTAAGTCTTGCAGGCCACGTATTC  
>HPV24\_Unclassified\_9628486\_nt0981\_Genome\_Tile\_rc|1  
CATTACTTATAAGATCTGATACATCAGAATCTGAATTTTGCTCAAGCAATGTGTCCAAAT  
>HPV24\_Unclassified\_9628486\_nt1061\_Genome\_Tile\_rc|1  
ACTTTGCAACAAAGCATTGCTCTCCTCTAACTCCTGCTGTTGAAACAGTTCTCGGGAGTT  
>HPV24\_Unclassified\_9628486\_nt1241\_Genome\_Tile\_rc|1  
TTCCTCCTGCTGCACCAATGTAGTAACATCTTCAGTTTCATTTGTAAGGGTCAATTCTAC  
>HPV24\_Unclassified\_9628486\_nt1261\_Genome\_Tile\_rc|1  
GTCTCTAAAGCTGGTACCTCTTCCTCCTGCTGCACCAATGTAGTAACATCTTCAGTTTCA  
>HPV24\_Unclassified\_9628486\_nt1281\_Genome\_Tile\_rc|1  
TTAAGTTACTGGTGGAAAGATGTCTCTAAAGCTGGTACCTCTTCCTCCTGCTGCACCAATG  
>HPV24\_Unclassified\_9628486\_nt1341\_Genome\_Tile\_rc|1  
AGGTAGCTTTTAAGTTACTGCATCGCATAAGTTCTTTATAATGTGCATTATCTTCCTTCC  
>HPV24\_Unclassified\_9628486\_nt1361\_Genome\_Tile\_rc|1  
ATTTTTTAAATTTTGATAGTAAGGTAGCTTTTAAAGTTACTGCATCGCATAAGTTCTTTATA  
>HPV24\_Unclassified\_9628486\_nt1381\_Genome\_Tile\_rc|1  
ACAAAGCTTACACCAAAGCATTTTTTAAATTTTGATAGTAAGGTAGCTTTTAAAGTTACTG  
>HPV24\_Unclassified\_9628486\_nt1401\_Genome\_Tile\_rc|1  
TGAAGTGGCGAGTCAGTTCAACAAAGCTTACACCAAAGCATTTTTTAAATTTTGATAGTA  
>HPV24\_Unclassified\_9628486\_nt1421\_Genome\_Tile\_rc|1  
ACAACAAGTCTTATTACTTCTGAACTGGCGAGTCAGTTCAACAAAGCTTACACCAAAGC  
>HPV24\_Unclassified\_9628486\_nt1481\_Genome\_Tile\_rc|1  
TTGCTTAGAACTTTCAAATAAATCATAATTTACACCATATATTGCTACCACCCAATCATT  
>HPV24\_Unclassified\_9628486\_nt1581\_Genome\_Tile\_rc|1  
TAACAGTTTGTCTATTTTTTGCCAGCCTTGAAACACAACAGATATAAAAACATTGCAGACA  
>HPV24\_Unclassified\_9628486\_nt1601\_Genome\_Tile\_rc|1  
CATAGACACTAATAACCTTATAACAGTTTGTCTATTTTTTGCCAGCCTTGAAACACAACAG  
>HPV24\_Unclassified\_9628486\_nt1641\_Genome\_Tile\_rc|1  
TTGGAGGTTCTGATAAAATTTGCTCCTCTGCCACATATAACATAGACACTAATAACCTTA  
>HPV24\_Unclassified\_9628486\_nt1741\_Genome\_Tile\_rc|1  
GTTTGTCTATAATCCATTTAGGATAAGACCCATGTGTAAAGGTAGCAGCATTTGAGCTA  
>HPV24\_Unclassified\_9628486\_nt2141\_Genome\_Tile\_rc|1  
ATATATTAATAAACAATTCTTTTTAGGTTTACCATGTAAAAATCTTTTAAAGCACTTAA  
>HPV24\_Unclassified\_9628486\_nt2781\_Genome\_Tile\_rc|1  
AACTGGTAAGTAACCCAGCCGACACCCCATTTTGTCTAGCATAATAAAGTAACACTGC  
>HPV24\_Unclassified\_9628486\_nt2821\_Genome\_Tile\_rc|1  
TAGCCTGTTTAGCTTTGGCTTCTGAGGTAGCTAGTGGTGGAACTGGTAAGTAACCCAGCC  
>HPV24\_Unclassified\_9628486\_nt2861\_Genome\_Tile\_rc|1  
GGAGATTGTTGTAAAGATTGCAGCTGCAACACCATACTAATAGCCTGTTTAGCTTTGGCT  
>HPV24\_Unclassified\_9628486\_nt2881\_Genome\_Tile\_rc|1  
TCCACTTTTCTGTGCCATAAGGAGATTGTTGTAAAGATTGCAGCTGCAACACCATACTAA  
>HPV24\_Unclassified\_9628486\_nt2901\_Genome\_Tile\_rc|1  
TATGCTTGTGTCCACAGTGTCACCTTTTCTGTGCCATAAGGAGATTGTTGTAAAGATTG  
>HPV24\_Unclassified\_9628486\_nt3141\_Genome\_Tile\_rc|1  
GTATCTATTGGCATCATCAGCAAACAGCACATAATAATGTTTAAACTCCCCCTATTAAATA  
>HPV24\_Unclassified\_9628486\_nt3281\_Genome\_Tile\_rc|1  
GTTGGGCTTGAGGCCTTGGAGTTAGCGGTGGATCCGGGTAGTTCTCGGGACCTCCTGGG

>HPV24\_Unclassified\_9628486\_nt3301\_Genome\_Tile\_rc|1  
AGGCTTGTTGTGGCTGTTGGGTTGGGCTTGAGGCCTTGAGTTAGCGGTGGATCCGGGTA  
>HPV24\_Unclassified\_9628486\_nt3361\_Genome\_Tile\_rc|1  
AGTCAGTGGGGCTTGACTCCCTTCGCCCCGTACCTCTTCCGCTTGGTTGTTTCGTCACTAC  
>HPV24\_Unclassified\_9628486\_nt3381\_Genome\_Tile\_rc|1  
GGATCGTCTGCTGCATCTGGAGTCAGTGGGGCTTGACTCCCTTCGCCCCGTACCTCTTCCG  
>HPV24\_Unclassified\_9628486\_nt3461\_Genome\_Tile\_rc|1  
CTAGATCGAGTTTGTAGTGGAGCTGCAGCGCGACCGGTGCGGGACCGTGCTCGTCGCCCT  
>HPV24\_Unclassified\_9628486\_nt3501\_Genome\_Tile\_rc|1  
GTTGCCCCCTGGAGGTTGATCTGGACCTCCTTGAGGTGGATCTAGATCGAGTTTGTAGTGGA  
>HPV24\_Unclassified\_9628486\_nt3541\_Genome\_Tile\_rc|1  
CTCCTCGTTGCCCTCTGGGGGTGTCTCCCTACACCTCCTGTTGCCCTGGAGGTTGATC  
>HPV24\_Unclassified\_9628486\_nt4001\_Genome\_Tile\_rc|1  
TTATCAAAACTTCCCAGTGACCAATCTACACCCTTAGGAAATCTTACTAGGTCGAGAAAC  
>HPV24\_Unclassified\_9628486\_nt4021\_Genome\_Tile\_rc|1  
GCTATGTTAGTACTTACAGTTTATCAAACTTCCCAGTGACCAATCTACACCCTTAGGAA  
>HPV24\_Unclassified\_9628486\_nt4041\_Genome\_Tile\_rc|1  
TATGTGTGTTAGTAGCAAAAGCTATGTTAGTACTTACAGTTTATCAAACTTCCCAGTGA  
>HPV24\_Unclassified\_9628486\_nt4081\_Genome\_Tile\_rc|1  
ACGCACCATTGCAAAGCATACAAAAGTAAAAATAGGTTATATGTGTGTTAGTAGCAAAA  
>HPV24\_Unclassified\_9628486\_nt4341\_Genome\_Tile\_rc|1  
GCAGGCCGAACGACTGTGGGTGTACTGCCACACGAACCTCCAGTACCTTCACCCAATGGC  
>HPV24\_Unclassified\_9628486\_nt4361\_Genome\_Tile\_rc|1  
CTATTACTTCAGGCACAAGGGCAGGCCGAACGACTGTGGGTGTACTGCCACACGAACCTC  
>HPV24\_Unclassified\_9628486\_nt4421\_Genome\_Tile\_rc|1  
TAGATGACGATGCTGGGTCAACAGGGGCTATTGTATCAACAGGTAATAAGTCAGCAGGAC  
>HPV24\_Unclassified\_9628486\_nt4441\_Genome\_Tile\_rc|1  
TGATTCAAGAGGAACTATAGATGACGATGCTGGGTCAACAGGGGCTATTGTATCAAC  
>HPV24\_Unclassified\_9628486\_nt4461\_Genome\_Tile\_rc|1  
GGTAAAGGTCTACACCTGATGATTCAAGAGGAACTATAGATGACGATGCTGGGTCA  
>HPV24\_Unclassified\_9628486\_nt4541\_Genome\_Tile\_rc|1  
TGCTTGTTGTCACTACTGGAGTATCAAAATGTGGGCACATCAGGTATAGGATGTACTTCTG  
>HPV24\_Unclassified\_9628486\_nt4561\_Genome\_Tile\_rc|1  
TAAATGGCACTAGAGCCTTTGCTTGTTGTCACTACTGGAGTATCAAAATGTGGGCACATC  
>HPV24\_Unclassified\_9628486\_nt4701\_Genome\_Tile\_rc|1  
GAGGCGACAATTATTTCTGCTCTGACAATGAACTCTCACCTTGACTTGGTGTAGATTCTGTA  
>HPV24\_Unclassified\_9628486\_nt4721\_Genome\_Tile\_rc|1  
CTGATTGTCCACCTGCACCAGAGGCGACAATTATTTCTGCTCTGACAATGAACTCTCACCTT  
>HPV24\_Unclassified\_9628486\_nt4741\_Genome\_Tile\_rc|1  
TATATTTTCAGAAACGCCTACTGATTGTCCACCTGCACCAGAGGCGACAATTATTTCTGTC  
>HPV24\_Unclassified\_9628486\_nt4781\_Genome\_Tile\_rc|1  
CTATTTCAAAAGAATATCTATTTGATAAATCCTGCAGTTCTATATTTTCAGAAACGCCTA  
>HPV24\_Unclassified\_9628486\_nt4861\_Genome\_Tile\_rc|1  
ATTTGTAAGTGATCTTTGTCTAAATGCTTGTTGTAGCTCTTTGTAATGGGGTACTGCTACG  
>HPV24\_Unclassified\_9628486\_nt4881\_Genome\_Tile\_rc|1  
ACTTGTTGTAACAGTCTCCTATTTGTAAGTGATCTTTGTCTAAATGCTTGTTGTAGCTCTT  
>HPV24\_Unclassified\_9628486\_nt4901\_Genome\_Tile\_rc|1  
ACAAAGGGTCTTCAACAGGCACTTGTTGTAACAGTCTCCTATTTGTAAGTGATCTTTGTGTC  
>HPV24\_Unclassified\_9628486\_nt5041\_Genome\_Tile\_rc|1  
CAGTTCTGCAATATCTAAAAATCTCTGTTAGGAGGCTCTACAAAACCTGCAAGGTCTTG  
>HPV24\_Unclassified\_9628486\_nt5101\_Genome\_Tile\_rc|1  
ACGACCCAATCTGCTTAACCTAACATAACCCTCGCGTGTTTCAGAAAAATCTAGGCCCTTCC  
>HPV24\_Unclassified\_9628486\_nt5121\_Genome\_Tile\_rc|1  
CTTGTTCTAATAGTTGCTCTACGACCCAATCTGCTTAACCTAACATAACCCTCGCGTGTT  
>HPV24\_Unclassified\_9628486\_nt5141\_Genome\_Tile\_rc|1

CTCCTATTTGTGTTCTGCCCCTTGTCTAATAGTTGCTCTACGACCCAATCTGCTTAACC  
>HPV24\_Unclassified\_9628486\_nt5161\_Genome\_Tile\_rc|1  
TTTATAAAAATGTACTTGTGCTCCTATTTGTGTTCTGCCCCTTGTCTAATAGTTGCTCT  
>HPV24\_Unclassified\_9628486\_nt5321\_Genome\_Tile\_rc|1  
TATCAATTTCCAACCTCCATTTGTTCAGCTAAAGGATTTTCTCTATATTAGTATCTATAA  
>HPV24\_Unclassified\_9628486\_nt5341\_Genome\_Tile\_rc|1  
TGAATGAGCTTCAGGATAAGTATCAATTTCCAACCTCCATTTGTTCAGCTAAAGGATTTTC  
>HPV24\_Unclassified\_9628486\_nt5361\_Genome\_Tile\_rc|1  
TCATCTAACAAAGCATCAAATGAATGAGCTTCAGGATAAGTATCAATTTCCAACCTCCATT  
>HPV24\_Unclassified\_9628486\_nt5401\_Genome\_Tile\_rc|1  
GCCTATAACTAACTGTGAACCACTAAAAATCGTCTGTTGCTTCATCTAACAAAGCATCAAA  
>HPV24\_Unclassified\_9628486\_nt5461\_Genome\_Tile\_rc|1  
AGAAGAATTTCTTGGGGATTCAAATCTAGGAACAGTATATGATGTAGTGATCTTCTATT  
>HPV24\_Unclassified\_9628486\_nt5521\_Genome\_Tile\_rc|1  
TATTTTATCGCGAGATTCAAGGATAGGCTACATAATATCCCTGCAAATCCTGTACATAATA  
>HPV24\_Unclassified\_9628486\_nt5541\_Genome\_Tile\_rc|1  
GGTGAGGGATAAATAAGTTCTATTTTATCGCGAGATTCAAGGATAGGCTACATAATATCCC  
>HPV24\_Unclassified\_9628486\_nt5561\_Genome\_Tile\_rc|1  
TGACAACTGCAGGTAATGTGGGTGAGGGATAAATAAGTTCTATTTTATCGCGAGATTCAG  
>HPV24\_Unclassified\_9628486\_nt5581\_Genome\_Tile\_rc|1  
ACTACTATCTTCTGTATGTATGACAACCTGCAGGTAATGTGGGTGAGGGATAAATAAGTTC  
>HPV24\_Unclassified\_9628486\_nt6101\_Genome\_Tile\_rc|1  
AGGTATTTTGTCTATCATCTGTGGACGATGCTTGTGTCCTATATGATACAGGGTTTTCTG  
>HPV24\_Unclassified\_9628486\_nt6201\_Genome\_Tile\_rc|1  
TCATTATTATCACCAGCACACCTCTCAGCTACTTCCCAATGTTCTCTATGCAGGGTGCA  
>HPV24\_Unclassified\_9628486\_nt6321\_Genome\_Tile\_rc|1  
CTTACGTCTGATCTACTTTGTTGTAGTGTCTAAAATTTAAATTCCCATAACCAATATCT  
>HPV24\_Unclassified\_9628486\_nt6341\_Genome\_Tile\_rc|1  
TTTCATTTACAATATCCAACTTACGTCTGATCTACTTTGTTGTAGTGTCTAAAATTTA  
>HPV24\_Unclassified\_9628486\_nt6721\_Genome\_Tile\_rc|1  
AAAATTGGTGTTCCTGGTGTATCTACTACCGTAATGAACAATTGATTAGCCCAACAAAT  
>HPV24\_Unclassified\_9628486\_nt6741\_Genome\_Tile\_rc|1  
TCAGTGTATACACTTATACTAAAATTGGTGTTCCTGGTGTATCTACTACCGTAATGAAC  
>HPV24\_Unclassified\_9628486\_nt6801\_Genome\_Tile\_rc|1  
CTCTGATATTCCCTAAATTTATTAGCATCATACTCGTTAATATCTGTTACTTTGCCATTT  
>HPV24\_Unclassified\_9628486\_nt6881\_Genome\_Tile\_rc|1  
TGATCTGTGCTAACACATCTGCTTTTAAAGGGATTTTACATAGCTGCAGTATAAGTGAAA  
>HPV24\_Unclassified\_9628486\_nt7161\_Genome\_Tile\_rc|1  
ACATTAGATGTTTTTTTTAGATGTTTTTTGTACAAGACCCGCTTGAAACAGGAACTTTTCGT  
>HPV24\_Unclassified\_9628486\_nt7181\_Genome\_Tile\_rc|1  
TTCGTTTGGTCCCCTTGGATACATTAGATGTTTTTTTAGATGTTTTTTGTACAAGACCCG  
>HPV24\_Unclassified\_9628486\_nt7241\_Genome\_Tile\_rc|1  
TTCTTGAATACACATATATTGTACCGAAAACGGTAAACAGCCTTTATTTTACGTGCGTT  
>HPV24\_Unclassified\_9628486\_nt7261\_Genome\_Tile\_rc|1  
ACGCACATGAATAACAAGCATTCTTGAATACACATATATTGTACCGAAAACGGTAAACA  
>HPV1\_Mu\_9626063\_nt0001\_Genome\_Tile\_rc|1  
TTCTGGCATATAACTCCTAGGTTCTTGTGTAACTAGAATAATGAATGATGGTAGTTAAC  
>HPV1\_Mu\_9626063\_nt0021\_Genome\_Tile\_rc|1  
TGTGTATTTTATAGGCTTACTTCTGGCATATAACTCCTAGGTTCTTGTGTAACTAGAAT  
>HPV1\_Mu\_9626063\_nt0041\_Genome\_Tile\_rc|1  
GTCCTGTGCAGAGTCTTACCTGTGTATTTTATAGGCTTACTTCTGGCATATAACTCCTAG  
>HPV1\_Mu\_9626063\_nt0081\_Genome\_Tile\_rc|1  
CGGAAAGCTGTCTGACGGTCCGGATTGGTGTGCGCATCTGGTCTGTGCAGAGTCTTACC  
>HPV1\_Mu\_9626063\_nt0101\_Genome\_Tile\_rc|1  
ATATGGGATACAGAGGCTTTCGGAAAGCTGTCTGACGGTCCGGATTGGTGTGCGCATCTG

>HPV1\_Mu\_9626063\_nt0121\_Genome\_Tile\_rc|1  
CAAGGCAATAAAACATCAATATATGGGATACAGAGGCTTTCGGAAAGCTGTCTGACGGTC  
>HPV1\_Mu\_9626063\_nt0201\_Genome\_Tile\_rc|1  
TGTCTCTCCAGACAAGATGCAAATCAAAATGATCAAAAAGCAGCTTCTCAGCATTAGACA  
>HPV1\_Mu\_9626063\_nt0241\_Genome\_Tile\_rc|1  
ACAGTTCTAGCACACCCTTGACAGCATCCAAACACCAAATTGTCTCTCCAGACAAGATGC  
>HPV1\_Mu\_9626063\_nt0261\_Genome\_Tile\_rc|1  
AAACAAACTCCAATAGGCTAACAGTTCTAGCACACCCTTGACAGCATCCAAACACCAAAT  
>HPV1\_Mu\_9626063\_nt0281\_Genome\_Tile\_rc|1  
ATAAGACTCCTGATAATATAAAACAAACTCCAATAGGCTAACAGTTCTAGCACACCCTTG  
>HPV1\_Mu\_9626063\_nt0301\_Genome\_Tile\_rc|1  
TCTTCTATTTCCGGTACCTCATAAGACTCCTGATAATATAAAACAAACTCCAATAGGCTA  
>HPV1\_Mu\_9626063\_nt0321\_Genome\_Tile\_rc|1  
ATAAAGGTCTGTCCAAAATTTCTTCTATTTCCGGTACCTCATAAGACTCCTGATAATATA  
>HPV1\_Mu\_9626063\_nt0341\_Genome\_Tile\_rc|1  
ACAACGGAGTTCAATTTGCAATAAAGGTCTGTCCAAAATTTCTTCTATTTCCGGTACCTC  
>HPV1\_Mu\_9626063\_nt0381\_Genome\_Tile\_rc|1  
CCAATTTTTCAGCAACACTCAGTTTTTTTATGCATGTAACACAACGGAGTTCAATTTGCA  
>HPV1\_Mu\_9626063\_nt0401\_Genome\_Tile\_rc|1  
TTCTCCGTTTGACACAACCTCCAATTTTTCAGCAACACTCAGTTTTTTTATGCATGTAAC  
>HPV1\_Mu\_9626063\_nt0461\_Genome\_Tile\_rc|1  
AGCATACAAGCGACACAAACTACACTTTGCTTTAAGTCTGTTTCTAACTCTATGCACTCT  
>HPV1\_Mu\_9626063\_nt0481\_Genome\_Tile\_rc|1  
TTGCGCCACCATTGTTATATAGCATACAAGCGACACAAACTACACTTTGCTTTAAGTCTG  
>HPV1\_Mu\_9626063\_nt0501\_Genome\_Tile\_rc|1  
AGGTCTTTTAGTGCTGGCATTTCGCCCCACCATTGTTATATAGCATACAAGCGACACAAAC  
>HPV1\_Mu\_9626063\_nt0521\_Genome\_Tile\_rc|1  
TTGGTTCAAGTTGAAGAACCAGGTCTTTAGTGCTGGCATTTCGCCCCACCATTGTTATAT  
>HPV1\_Mu\_9626063\_nt0541\_Genome\_Tile\_rc|1  
AAGATCTAAATCTAGGACGCTTGTTCAAGTTGAAGAACCAGGTCTTTAGTGCTGGCAT  
>HPV1\_Mu\_9626063\_nt0601\_Genome\_Tile\_rc|1  
TTGCTGAGGCGACACTAACTCCTCCTCTATGTCATCAGGAGGCACCTCCTCGTAACAATA  
>HPV1\_Mu\_9626063\_nt0621\_Genome\_Tile\_rc|1  
GAAGCAACGACAGCATAAGGTTGCTGAGGCGACACTAACTCCTCCTCTATGTCATCAGGA  
>HPV1\_Mu\_9626063\_nt0701\_Genome\_Tile\_rc|1  
GAAGGAGTTCTCCAGCTGTCTAATGGCGCTGTGATCCGCGAGGACGGTCAATCGAACCA  
>HPV1\_Mu\_9626063\_nt0721\_Genome\_Tile\_rc|1  
CACGATGTTCAAAGATCGCAGAAGGAGTTCTTCCAGCTGTCTAATGGCGCTGTGATCCGC  
>HPV1\_Mu\_9626063\_nt0741\_Genome\_Tile\_rc|1  
TGTAGGGTGACAGTGGGCACACGATGTTCAAAGATCGCAGAAGGAGTTCTTCCAGCTGT  
>HPV1\_Mu\_9626063\_nt0801\_Genome\_Tile\_rc|1  
TCGCCTCCACCAAAAACCAATCGTTTTTCAGTACCTTTATTATCTGCCATTTTACTGTGCG  
>HPV1\_Mu\_9626063\_nt0841\_Genome\_Tile\_rc|1  
TCACCAAGTGAGTTTCCTCTAACGTTTCCTCACAATCTGTGCGCTCCACCAAAAACCAA  
>HPV1\_Mu\_9626063\_nt0881\_Genome\_Tile\_rc|1  
TAAATCAGATAAGTCGCTAACACAAGAAACATTATCTAGGTCACCAAGTGAGGTTTCCTC  
>HPV1\_Mu\_9626063\_nt1021\_Genome\_Tile\_rc|1  
TCTGTTTTCGTCCGCGCTTCTCGCCTGAGGACTGTAAAGTAACTTTTCGTTTTAAAGCATTA  
>HPV1\_Mu\_9626063\_nt1041\_Genome\_Tile\_rc|1  
TAGGACTAATGCTAGCAATGTCTGTTTCGTCCGCGCTTCTCGCCTGAGGACTGTAAAGTA  
>HPV1\_Mu\_9626063\_nt1081\_Genome\_Tile\_rc|1  
CTTTTTTTGTCTTGCTTTGTAATAGAAATAGTTTTCTAATCTAGGACTAATGCTAGCAATG  
>HPV1\_Mu\_9626063\_nt1101\_Genome\_Tile\_rc|1  
AAAACAGTTGCCTTCGATACCTTTTTTTTGCTTGCTTTGTAATAGAAATAGTTTCTAATC  
>HPV1\_Mu\_9626063\_nt1121\_Genome\_Tile\_rc|1

TAAACCACTATCATCCTGAGAAAACAGTTGCCTTCGATACCTTTTTTTGTCTTGCTTTGT  
>HPV1\_Mu\_9626063\_nt1141\_Genome\_Tile\_rc|1  
TCCTGAAGCAGCGATAGCTCTAAACCACTATCATCCTGAGAAAACAGTTGCCTTCGATAC  
>HPV1\_Mu\_9626063\_nt1161\_Genome\_Tile\_rc|1  
CATCAATATTTTCAGTTTCATCCTGAAGCAGCGATAGCTCTAAACCACTATCATCCTGAG  
>HPV1\_Mu\_9626063\_nt1181\_Genome\_Tile\_rc|1  
TTGATCTACCTGTGTCGATTCATCAATATTTTCAGTTTCATCCTGAAGCAGCGATAGCTC  
>HPV1\_Mu\_9626063\_nt1201\_Genome\_Tile\_rc|1  
CCAGTATGTTCTTTCTGCTGTTGATCTACCTGTGTCGATTCATCAATATTTTCAGTTTCA  
>HPV1\_Mu\_9626063\_nt1221\_Genome\_Tile\_rc|1  
CCCCAGCGGCCCAACTTCCCCAGTATGTTCTTTCTGCTGTTGATCTACCTGTGTCGATT  
>HPV1\_Mu\_9626063\_nt1241\_Genome\_Tile\_rc|1  
ACTAGCTTTCAAAATGTTACCCCCAGCGGCCCAACTTCCCCAGTATGTTCTTTCTGCTG  
>HPV1\_Mu\_9626063\_nt1261\_Genome\_Tile\_rc|1  
AATAATGCGGCGCGGATATTACTAGCTTTCAAAATGTTACCCCCAGCGGCCCAACTTCC  
>HPV1\_Mu\_9626063\_nt1281\_Genome\_Tile\_rc|1  
CCGTATCTTTAAATCTGCTTAATAATGCGGCGCGGATATTACTAGCTTTCAAAATGTTCA  
>HPV1\_Mu\_9626063\_nt1301\_Genome\_Tile\_rc|1  
GTCTGTAAACTGACGCCAGCCGTATCTTTAAATCTGCTTAATAATGCGGCGCGGATATT  
>HPV1\_Mu\_9626063\_nt1321\_Genome\_Tile\_rc|1  
CTCTTGTAACGACGCGTCAGGTCTGTAAACTGACGCCAGCCGTATCTTTAAATCTGCTT  
>HPV1\_Mu\_9626063\_nt1401\_Genome\_Tile\_rc|1  
ATAATTCTTTTACACTGTCAATTAAATTTTCACGGACACCCCAAACCTGCCAAAACCCAAT  
>HPV1\_Mu\_9626063\_nt1421\_Genome\_Tile\_rc|1  
ATACACACAATGGGTTTGCAATAATTCTTTTACACTGTCAATTAAATTTTCACGGACACC  
>HPV1\_Mu\_9626063\_nt1441\_Genome\_Tile\_rc|1  
ACTGCATGTTCCAATTGAATATACACACAATGGGTTTGCAATAATTCTTTTACACTGTCA  
>HPV1\_Mu\_9626063\_nt1461\_Genome\_Tile\_rc|1  
AAAATCTATTTTTTTTCAGTTACTGCATGTTCCAATTGAATATACACACAATGGGTTTGCA  
>HPV1\_Mu\_9626063\_nt1481\_Genome\_Tile\_rc|1  
AAATCGTACCAATAAAAATAAAAATCTATTTTTTTTCAGTTACTGCATGTTCCAATTGAAT  
>HPV1\_Mu\_9626063\_nt1501\_Genome\_Tile\_rc|1  
TCTCTACTTTTCTGGGCTTTAAATCGTACCAATAAAAATAAAAATCTATTTTTTTTCAGTT  
>HPV1\_Mu\_9626063\_nt1521\_Genome\_Tile\_rc|1  
TTATAAGTTTATCACAGTCTCTCTACTTTTCTGGGCTTTAAATCGTACCAATAAAAATA  
>HPV1\_Mu\_9626063\_nt1541\_Genome\_Tile\_rc|1  
ATCAACTGGAAGAATTGTGGTTATAAGTTTATCACAGTCTCTCTACTTTTCTGGGCTTT  
>HPV1\_Mu\_9626063\_nt1561\_Genome\_Tile\_rc|1  
TCAGACAAAATATAGCTAGCATCAACTGGAAGAATTGTGGTTATAAGTTTATCACAGTC  
>HPV1\_Mu\_9626063\_nt1581\_Genome\_Tile\_rc|1  
CACTTCTTGATTTTGGAGGCTCAGACAAAATATAGCTAGCATCAACTGGAAGAATTGTGG  
>HPV1\_Mu\_9626063\_nt1661\_Genome\_Tile\_rc|1  
TGCAATCCACTCCAAAGTTGTACCCCATGTAAAAACAGTTGAAGACATAGATCTTTTATA  
>HPV1\_Mu\_9626063\_nt1681\_Genome\_Tile\_rc|1  
TGATTAATAAGGGTTTGCTGTGCAATCCACTCCAAAGTTGTACCCCATGTAAAAACAGTT  
>HPV1\_Mu\_9626063\_nt1701\_Genome\_Tile\_rc|1  
GACTTTCGGAATCTAACTGATGATTAATAAGGGTTTGCTGTGCAATCCACTCCAAAGTTG  
>HPV1\_Mu\_9626063\_nt1901\_Genome\_Tile\_rc|1  
CATTTGTGCCATCTCAGCACGTAAATAGTGCTTACCATTGTGCACAGTCTTTCACATA  
>HPV1\_Mu\_9626063\_nt1941\_Genome\_Tile\_rc|1  
CTACATTATCTAGTTTTCTAAAAATCCACTCTGACATAGACATTTGTGCCATCTCAGCAC  
>HPV1\_Mu\_9626063\_nt1981\_Genome\_Tile\_rc|1  
CTTAAAAATCTTACAATTTCTTTCCAATTACCAGAACCTTCTACATTATCTAGTTTTCTA  
>HPV1\_Mu\_9626063\_nt2081\_Genome\_Tile\_rc|1  
ATTTGGAGGTCCAAATATTAACAAACAGTTTTTCTTTGGCTTACCACATAACAAATCTTT



>HPV1\_Mu\_9626063\_nt2121\_Genome\_Tile\_rc|1  
ACAACCTTTAATAAACTTGTACAAAACATTGATTTTCCTGTATTTGGAGGTCCAAATATTA  
>HPV1\_Mu\_9626063\_nt2141\_Genome\_Tile\_rc|1  
TGAAATCACTTTCCTCCTAACAACTTTAATAAACTTGTACAAAACATTGATTTTCCTGT  
>HPV1\_Mu\_9626063\_nt2161\_Genome\_Tile\_rc|1  
TGACTTTTACTGTTACAGTATGAAATCACTTTCCTCCTAACAACTTTAATAAACTTGTA  
>HPV1\_Mu\_9626063\_nt2321\_Genome\_Tile\_rc|1  
TGGGCATTTAATTTGTTGAGGAGCTCTATGTTTTAAATCAATACAAATAGTGTTACCATC  
>HPV1\_Mu\_9626063\_nt2381\_Genome\_Tile\_rc|1  
ATGCAAAATACATCCAACAGGTATCTGATTTAACATCAATATTACTAGTAATAAGTAAAGG  
>HPV1\_Mu\_9626063\_nt2401\_Genome\_Tile\_rc|1  
TTAAAAGCTGATATTCTACTATGCAAAATACATCCAACAGGTATCTGATTTAACATCAATA  
>HPV1\_Mu\_9626063\_nt2421\_Genome\_Tile\_rc|1  
ATGGAAACTCATGAGCAAATTTAAAAGCTGATATTCTACTATGCAAAATACATCCAACAGG  
>HPV1\_Mu\_9626063\_nt2441\_Genome\_Tile\_rc|1  
TGGATCACCATTGTCCTTTAAATGGAAACTCATGAGCAAATTTAAAAGCTGATATTCTACT  
>HPV1\_Mu\_9626063\_nt2461\_Genome\_Tile\_rc|1  
TCGTCTGTTAAGGAAAATCCTGGATCACCATTGTCCTTTAAATGGAAACTCATGAGCAAAT  
>HPV1\_Mu\_9626063\_nt2641\_Genome\_Tile\_rc|1  
TAATTAGATTCCACTGCTTAATTTGATCTTCTATCAATTTACTGTCTGTTCATATAGGT  
>HPV1\_Mu\_9626063\_nt2661\_Genome\_Tile\_rc|1  
GAAAAGAAGCTTGTCTTGTCTAATTAGATTCCACTGCTTAATTTGATCTTCTATCAATTT  
>HPV1\_Mu\_9626063\_nt2721\_Genome\_Tile\_rc|1  
CGCTAAAGATGGAAGTGCCTGCAATCCAATTCTCATTACCCATTTTTTCTGGCGAAATG  
>HPV1\_Mu\_9626063\_nt2741\_Genome\_Tile\_rc|1  
TTTGCTTCTCCTGTGAGGACGCTAAAGATGGAAGTGCCTGCAATCCAATTCTCATTACC  
>HPV1\_Mu\_9626063\_nt2761\_Genome\_Tile\_rc|1  
ACACCATTTCAATAGCTGTCTTTGCCTTCTCCTGTGAGGACGCTAAAGATGGAAGTGCCT  
>HPV1\_Mu\_9626063\_nt2781\_Genome\_Tile\_rc|1  
CTTTAAAGACTCTAAATGTAACACCATTTCAATAGCTGTCTTTGCCTTCTCCTGTGAGGA  
>HPV1\_Mu\_9626063\_nt2821\_Genome\_Tile\_rc|1  
TGTCTTGAAAGTGACCAATCCTCTGTGCCATAAGGTGAGTCCTTTAAAGACTCTAAATGTA  
>HPV1\_Mu\_9626063\_nt2921\_Genome\_Tile\_rc|1  
CTTGTCTGATTATCAGGGTTATTGTCATAGGTAACCTCAAGTGTGCTGCCACTCTTCTTG  
>HPV1\_Mu\_9626063\_nt2941\_Genome\_Tile\_rc|1  
CATGATTCCAAATTGTGTGCCTTGTCTGATTATCAGGGTTATTGTCATAGGTAACCTCAA  
>HPV1\_Mu\_9626063\_nt2961\_Genome\_Tile\_rc|1  
GTCCCCATTTTGATAATACACATGATTCCAAATTGTGTGCCTTGTCTGATTATCAGGGTT  
>HPV1\_Mu\_9626063\_nt3001\_Genome\_Tile\_rc|1  
CTACAGCATCAACACCACTGGATACTTTTCTCCATACATCGTCCCCATTTTGATAATACA  
>HPV1\_Mu\_9626063\_nt3021\_Genome\_Tile\_rc|1  
GTGTTCTAAATAGTACACTCCTACAGCATCAACACCACTGGATACTTTTCTCCATACATC  
>HPV1\_Mu\_9626063\_nt3041\_Genome\_Tile\_rc|1  
TAATAATTTTATAGCCATCGTGTCTAAATAGTACACTCCTACAGCATCAACACCACTG  
>HPV1\_Mu\_9626063\_nt3061\_Genome\_Tile\_rc|1  
CCTCCTCAGCAAATAACACATAATAATTTTATAGCCATCGTGTCTAAATAGTACACTC  
>HPV1\_Mu\_9626063\_nt3101\_Genome\_Tile\_rc|1  
TAATTTACAGCATATTGTCCTGTGTGCTGTACTTAGAGGCCTCCTCAGCAAATAACACA  
>HPV1\_Mu\_9626063\_nt3121\_Genome\_Tile\_rc|1  
TTGTAAACCTTTTACCCCTGTAATTTACAGCATATTGTCCTGTGTGCTGTACTTAGAGG  
>HPV1\_Mu\_9626063\_nt3141\_Genome\_Tile\_rc|1  
GCTAGTGGAAGACATAACATTTGTAAACCTTTTACCCCTGTAATTTACAGCATATTGTCC  
>HPV1\_Mu\_9626063\_nt3181\_Genome\_Tile\_rc|1  
AGTCGGAGTGACTGCAGGAGCCCCAGCAGCCCTTGGGGAGCTAGTGGAAGACATAACAT  
>HPV1\_Mu\_9626063\_nt3201\_Genome\_Tile\_rc|1

ACTCTCGGATAGGGTTGGGTAGTCGGAGTGTACTGCAGGAGCCCCAGCAGCCCTTGGGGA  
>HPV1\_Mu\_9626063\_nt3241\_Genome\_Tile\_rc|1  
GTTTCGGTGTAGTCGATGGACGTCGATTGCTGGGCGGTGTCACTCTCGGATAGGGTTGGGT  
>HPV1\_Mu\_9626063\_nt3281\_Genome\_Tile\_rc|1  
TGTCTTTGTCGGACCTGCGAGGTCTCCCCCTGTCCTGGGAGTTCGGTGTAGTCGATGGAC  
>HPV1\_Mu\_9626063\_nt3301\_Genome\_Tile\_rc|1  
TGCGTACAGGTGTTTTCTGCTGTCTTTGTCGGACCTGCGAGGTCTCCCCCTGTCCTGGGA  
>HPV1\_Mu\_9626063\_nt3381\_Genome\_Tile\_rc|1  
TGTCCTAGAGGGCGTTGATTCTCTTCTCTTCGTCCTCCACCTCTGGGACTTCTGGATCT  
>HPV1\_Mu\_9626063\_nt3521\_Genome\_Tile\_rc|1  
AGCTGATTGGCACCCCTTTTACACAGACCACGGGTGGATCCCAAGCTTCCTGCAGAAGT  
>HPV1\_Mu\_9626063\_nt3581\_Genome\_Tile\_rc|1  
GTGCTTATGCTGTCAAAGTCAACTTGAGTAGATGCTTTAAGTCTGTACCTGAGACACTTA  
>HPV1\_Mu\_9626063\_nt3621\_Genome\_Tile\_rc|1  
TATCCTCTCGGTGTTTTTCTATCTGTCCAATGCCATGTGGTGCTTATGCTGTCAAAGTC  
>HPV1\_Mu\_9626063\_nt3641\_Genome\_Tile\_rc|1  
ACTAACATTCTAGCACTACCTATCCTCTCGGTGTTTTTCTATCTGTCCAATGCCATGTG  
>HPV1\_Mu\_9626063\_nt3661\_Genome\_Tile\_rc|1  
GAGCCTCATCAATAAACTTTACTAACATTCTAGCACTACCTATCCTCTCGGTGTTTTTTC  
>HPV1\_Mu\_9626063\_nt3681\_Genome\_Tile\_rc|1  
CTCAAGAACTTCTCTCGTTGAGCCTCATCAATAAACTTTACTAACATTCTAGCACTACC  
>HPV1\_Mu\_9626063\_nt3701\_Genome\_Tile\_rc|1  
GATCTGGGCAAAGCAACTCTCTCAAGAACTTCTCTCGTTGAGCCTCATCAATAAACTTT  
>HPV1\_Mu\_9626063\_nt3721\_Genome\_Tile\_rc|1  
GTCCCCAAAACACAGACACTGATCTGGGCAAAGCAACTCTCTCAAGAACTTCTCTCGTT  
>HPV1\_Mu\_9626063\_nt3741\_Genome\_Tile\_rc|1  
ATTTTAAAGACCCATTAAACTGTCCAAAAACACAGACACTGATCTGGGCAAAGCAACTCT  
>HPV1\_Mu\_9626063\_nt3781\_Genome\_Tile\_rc|1  
GGACTATGTACACACGTCCAAGCAAAATCAACTTCCATTAATTTTAAAGACCCATTAAACT  
>HPV1\_Mu\_9626063\_nt3801\_Genome\_Tile\_rc|1  
TAGGAGGGGAATATATACAGGGACTATGTACACACGTCCAAGCAAAATCAACTTCCATTA  
>HPV1\_Mu\_9626063\_nt3821\_Genome\_Tile\_rc|1  
AGCTTCAAGGTATGTGGGGGTAGGAGGGGAATATATACAGGGACTATGTACACACGTCCA  
>HPV1\_Mu\_9626063\_nt3841\_Genome\_Tile\_rc|1  
ACATTTGTTACAATGTTGCAAGCTTCAAGGTATGTGGGGGTAGGAGGGGAATATATACAG  
>HPV1\_Mu\_9626063\_nt3861\_Genome\_Tile\_rc|1  
GCGTTTTCTACGTAGGCGATACATTTGTTACAATGTTGCAAGCTTCAAGGTATGTGGGGG  
>HPV1\_Mu\_9626063\_nt3881\_Genome\_Tile\_rc|1  
TATATATCTTTGGGGGCAGCGCGTTTTCTACGTAGGCGATACATTTGTTACAATGTTGCA  
>HPV1\_Mu\_9626063\_nt3941\_Genome\_Tile\_rc|1  
GTATGCTCAATTTTATTTTGAATGTCAGGTGGGCAGGTGTTTGATATTTTGCATGAGGGG  
>HPV1\_Mu\_9626063\_nt4061\_Genome\_Tile\_rc|1  
CCACCCTCACCGAGGGGAGTATAACCAATTCCTCCTCCAGAGCCTCTGGCTGTTCCAATG  
>HPV1\_Mu\_9626063\_nt4121\_Genome\_Tile\_rc|1  
ACTGTTTCCACAGGTATTGTAGGCCTTACTGGAGTTGGACGAGTAGCAACTCTAACCCCA  
>HPV1\_Mu\_9626063\_nt4141\_Genome\_Tile\_rc|1  
GGAAAATTTCACTGGGGCCTACTGTTTCCACAGGTATTGTAGGCCTTACTGGAGTTGGAC  
>HPV1\_Mu\_9626063\_nt4161\_Genome\_Tile\_rc|1  
AGGATCTACAACATCTATGGGGAAAATTTCACTGGGGCCTACTGTTTCCACAGGTATTGT  
>HPV1\_Mu\_9626063\_nt4201\_Genome\_Tile\_rc|1  
CTCTACCTAAATCTTGTAGGGGAATAACAGCAGGCCTGTAGGATCTACAACATCTATGG  
>HPV1\_Mu\_9626063\_nt4221\_Genome\_Tile\_rc|1  
CACAGTTGGTATTGGGAAGTCTCTACCTAAATCTTGTAGGGGAATAACAGCAGGGCCTGT  
>HPV1\_Mu\_9626063\_nt4241\_Genome\_Tile\_rc|1  
TGAATTTCTGCAATAACCTGCACAGTTGGTATTGGGAAGTCTCTACCTAAATCTTGTAGG

>HPV1\_Mu\_9626063\_nt4261\_Genome\_Tile\_rc|1  
TTGGTATGTCAGAAATAGGGTGAATTTCTGCAATAACCTGCACAGTTGGTATTGGGAAGT  
>HPV1\_Mu\_9626063\_nt4281\_Genome\_Tile\_rc|1  
TGTTGAAGATGCAACAATGTTTGGTATGTCAGAAATAGGGTGAATTTCTGCAATAACCTG  
>HPV1\_Mu\_9626063\_nt4301\_Genome\_Tile\_rc|1  
ATGGCAGATTCTCCTTCATTTGTTGAAGATGCAACAATGTTTGGTATGTCAGAAATAGGG  
>HPV1\_Mu\_9626063\_nt4321\_Genome\_Tile\_rc|1  
TCCCTCGTAACACATCTAATATGGCAGATTCTCCTTCATTTGTTGAAGATGCAACAATGT  
>HPV1\_Mu\_9626063\_nt4341\_Genome\_Tile\_rc|1  
AACAGTGCATGATTGGTTGCATTCCCTCGTAACACATCTAATATGGCAGATTCTCCTTCATT  
>HPV1\_Mu\_9626063\_nt4361\_Genome\_Tile\_rc|1  
TTATTGTATTGTGTTCTTGAAACAGTGCGTATGGTTGCATTCCCTCGTAACACATCTAAT  
>HPV1\_Mu\_9626063\_nt4381\_Genome\_Tile\_rc|1  
ATGCAACAGTGAAAGAGGGGTTATTGTATTGTGTTCTTGAAACAGTGCGTATGGTTGCAT  
>HPV1\_Mu\_9626063\_nt4401\_Genome\_Tile\_rc|1  
AGCACTTATATTAGATGTAGATGCAACAGTGAAAGAGGGGTTATTGTATTGTGTTCTTGA  
>HPV1\_Mu\_9626063\_nt4421\_Genome\_Tile\_rc|1  
TCTGATGTTGATGCTTCTCCAGCACTTATATTAGATGCAACAGTGAAAGAGGGG  
>HPV1\_Mu\_9626063\_nt4441\_Genome\_Tile\_rc|1  
CATTGCTAACAATAACAATATCTGATGTTGATGCTTCTCCAGCACTTATATTAGATGTAG  
>HPV1\_Mu\_9626063\_nt4481\_Genome\_Tile\_rc|1  
ACCAAGGGGATATCCTCGCCACCACCTGTCACCTGAACATTGCTAACAATAACAATA  
>HPV1\_Mu\_9626063\_nt4501\_Genome\_Tile\_rc|1  
CAAGGCCTAAGTTTAATTCTACCAAGGGGATATCCTCGCCACCACCTGTCACCTGAAC  
>HPV1\_Mu\_9626063\_nt4521\_Genome\_Tile\_rc|1  
AACAGAAGATGTGTCTGTTTCAAGGCCTAAGTTTAATTCTACCAAGGGGATATCCTCGCC  
>HPV1\_Mu\_9626063\_nt4541\_Genome\_Tile\_rc|1  
GAAATGCTGTTTCTTGTAACAAGATGTGTCTGTTTCAAGGCCTAAGTTTAATTCT  
>HPV1\_Mu\_9626063\_nt4561\_Genome\_Tile\_rc|1  
CAGCAATTGGTGTGCTGCTGGAAAATGCTGTTTCTTGTAACAAGATGTGTCTGTTT  
>HPV1\_Mu\_9626063\_nt4581\_Genome\_Tile\_rc|1  
GGGCCTAAAAGAGGGTCTTTTCAGCAATTGGTGTGCTGCTGGAAAATGCTGTTTCTTGTA  
>HPV1\_Mu\_9626063\_nt4641\_Genome\_Tile\_rc|1  
AACGAACCTAGGGTCTTGTAAGTGTGACCTGTTTATATAGACGCTTATTATAGAATCTTGA  
>HPV1\_Mu\_9626063\_nt4661\_Genome\_Tile\_rc|1  
ACCATTGACTGTGGCTGCTCAACGAACCTAGGGTCTTGTAAGTGTGACCTGTTTATATAGA  
>HPV1\_Mu\_9626063\_nt4741\_Genome\_Tile\_rc|1  
GAGCAAGAGCATCTAAGTCTCTTTGGAAGATAATAGACACCTCATCAAGCTCTGGCTCAA  
>HPV1\_Mu\_9626063\_nt4761\_Genome\_Tile\_rc|1  
AAATTCAGGCACTGGTGTCTGAGCAAGAGCATCTAAGTCTCTTTGGAAGATAATAGACAC  
>HPV1\_Mu\_9626063\_nt4781\_Genome\_Tile\_rc|1  
CTCAGATAAACTACATCTCTAAATTCAGGCACTGGTGTCTGAGCAAGAGCATCTAAGTCT  
>HPV1\_Mu\_9626063\_nt4821\_Genome\_Tile\_rc|1  
CCTTAACCGTCCCCCTGGTTCCCGCGAAAATGTGGGCTTGCTCAGATAAACTACATCTCT  
>HPV1\_Mu\_9626063\_nt4861\_Genome\_Tile\_rc|1  
GGCGTGTAAGCAATAGTTGAACCTTTTGCCAAGGCGGCTAACCTTAACCGTCCCCCTGGTT  
>HPV1\_Mu\_9626063\_nt4881\_Genome\_Tile\_rc|1  
GGCGCCAATTGCTGTGCCCAGGCGGTGTAAGCAATAGTTGAACCTTTTGCCAAGGCGGCTAAC  
>HPV1\_Mu\_9626063\_nt4921\_Genome\_Tile\_rc|1  
CTGGAGCAATAAGCACTTAAATCATAGAAAAAGTGGGTTCTGGCGCCAATTGCTGTGCCCA  
>HPV1\_Mu\_9626063\_nt4941\_Genome\_Tile\_rc|1  
CAATAATTCAATTGAGTCTTCTGGAGCAATAGAACTTAAATCATAGAAAAAGTGGGTTCT  
>HPV1\_Mu\_9626063\_nt4961\_Genome\_Tile\_rc|1  
TGACTATGCTCACCTAAAGGCAATAATTCAATTGAGTCTTCTGGAGCAATAAGCACTTAA  
>HPV1\_Mu\_9626063\_nt4981\_Genome\_Tile\_rc|1

TGGAAC TAATGACTGTTGTTTGACTATGCTCACCTAAAGGCAATAATTCAATTGAGTCTT  
>HPV1\_Mu\_9626063\_nt5001\_Genome\_Tile\_rc|1  
AAATGCTGTGTCACCTAAGTTGGAAC TAATGACTGTTGTTTGACTATGCTCACCTAAAGG  
>HPV1\_Mu\_9626063\_nt5021\_Genome\_Tile\_rc|1  
TCTGCTGTCTCACCTTGTATAAATGCTGTGTCACCTAAGTTGGAAC TAATGACTGTTGTT  
>HPV1\_Mu\_9626063\_nt5041\_Genome\_Tile\_rc|1  
AGATAACTTCTAAGTCATCCTCTGCTGTCTCACCTTGTATAAATGCTGTGTCACCTAAGT  
>HPV1\_Mu\_9626063\_nt5061\_Genome\_Tile\_rc|1  
TAATTGTGGTGTTTCTAAAGAGATAACTTCTAAGTCATCCTCTGCTGTCTCACCTTGTAT  
>HPV1\_Mu\_9626063\_nt5081\_Genome\_Tile\_rc|1  
AAAAGCTCTTCTTCTGAATATAATTGTGGTGTTTCTAAAGAGATAACTTCTAAGTCATCC  
>HPV1\_Mu\_9626063\_nt5101\_Genome\_Tile\_rc|1  
CCACACTTTCGTTTGTGTCTAAAAGCTCTTCTTCTGAATATAATTGTGGTGTTTCTAAAG  
>HPV1\_Mu\_9626063\_nt5121\_Genome\_Tile\_rc|1  
AGTAAGTTGCAAATTTTCGCCCACACTTTCGTTTGTGTCTAAAAGCTCTTCTTCTGAATA  
>HPV1\_Mu\_9626063\_nt5141\_Genome\_Tile\_rc|1  
TCACCTCTGAGTTAGTAATAGTAAGTTGCAAATTTTCGCCCACACTTTCGTTTGTGTCT  
>HPV1\_Mu\_9626063\_nt5161\_Genome\_Tile\_rc|1  
TTAAATCTAGTATAGAAACCTCACCTCTGAGTTAGTAATAGTAAGTTGCAAATTTTCGC  
>HPV1\_Mu\_9626063\_nt5181\_Genome\_Tile\_rc|1  
TGGCCTGACTCTGCTTTGTGTTAAATCTAGTATAGAAACCTCACCTCTGAGTTAGTAAT  
>HPV1\_Mu\_9626063\_nt5201\_Genome\_Tile\_rc|1  
GTATCTTCAGTGCCAAAAGGTGGCCTGACTCTGCTTTGTGTTAAATCTAGTATAGAAACC  
>HPV1\_Mu\_9626063\_nt5261\_Genome\_Tile\_rc|1  
TCTTCAGGATTAATTATTGGAGTCCCTTTAGAAGAATTTGGGTAATATACATGCAAGCTA  
>HPV1\_Mu\_9626063\_nt5301\_Genome\_Tile\_rc|1  
TGAGTTGTTAAGAGCTATAATAACCAAAGGTGTAAATGATTCTTCAGGATTAATTATTGG  
>HPV1\_Mu\_9626063\_nt5321\_Genome\_Tile\_rc|1  
TGTAAC TCAAAATCCCCTGTTGAGTTGTTAAGAGCTATAATAACCAAAGGTGTAAATGAT  
>HPV1\_Mu\_9626063\_nt5361\_Genome\_Tile\_rc|1  
TTATACATAAGCTCTTTTACGACGCTTCTAAGACTAGGATGTAAC TCAAAATCCCCTGT  
>HPV1\_Mu\_9626063\_nt5381\_Genome\_Tile\_rc|1  
AGACAGCCATCTGAAAAACATTATACATAAGCTCTTTTACGACGCTTCTAAGACTAGGA  
>HPV1\_Mu\_9626063\_nt5401\_Genome\_Tile\_rc|1  
CTTATTCTGCGCTGGTAACCAGACAGCCATCTGAAAAACATTATACATAAGCTCTTTTAC  
>HPV1\_Mu\_9626063\_nt5441\_Genome\_Tile\_rc|1  
TGGACAGGATTCTAGTGATGGGCTGGGGAGGAAGATAGA ACTTATTCTGCGCTGGTAACC  
>HPV1\_Mu\_9626063\_nt5461\_Genome\_Tile\_rc|1  
TCTGGTTACATATTCATCAGTGGACAGGATTCTAGTGATGGGCTGGGGAGGAAGATAGAA  
>HPV1\_Mu\_9626063\_nt5501\_Genome\_Tile\_rc|1  
GCAGTAGACGTT CAGATGTTGCATGGTAGAAGAGATTGGTTCTGGTTACATATTCATCAG  
>HPV1\_Mu\_9626063\_nt5541\_Genome\_Tile\_rc|1  
GTTTGATTACTGGAGATCTCAAACAAAGGATGTCCGACCAGCAGTAGACGTT CAGATGTT  
>HPV1\_Mu\_9626063\_nt5581\_Genome\_Tile\_rc|1  
AACTCTAAATGCATTTGGTGACACTTTTGGTATAGTTACAGTTTGATTACTGGAGATCTC  
>HPV1\_Mu\_9626063\_nt5601\_Genome\_Tile\_rc|1  
TCAGCAAAACGCACCCTAAAACTCTAAATGCATTTGGTGACACTTTTGGTATAGTTACA  
>HPV1\_Mu\_9626063\_nt5621\_Genome\_Tile\_rc|1  
CAAATGCAAATCTATTTGGATCAGCAAAACGCACCCTAAAACTCTAAATGCATTTGGTG  
>HPV1\_Mu\_9626063\_nt5641\_Genome\_Tile\_rc|1  
ATTAAAAATTGCCTTATCCCCAAATGCAATCTATTTGGATCAGCAAAACGCACCCTAAA  
>HPV1\_Mu\_9626063\_nt5741\_Genome\_Tile\_rc|1  
ACTTATTTAAAAGAGGGTGGCCCGTTATTCCTATACCTAAAGGCTGGCCTCTACCTATCT  
>HPV1\_Mu\_9626063\_nt5781\_Genome\_Tile\_rc|1  
TGAGTATTAATATAATTGTTGGATTTTCTGCATCATCTAACTTATTTAAAAGAGGGTGG

>HPV1\_Mu\_9626063\_nt5801\_Genome\_Tile\_rc|1  
GTCTAGAATCTCCATTTGCATGAGTATTAATATAATTTGTTGGATTTTCTGCATCATCTA  
>HPV1\_Mu\_9626063\_nt5921\_Genome\_Tile\_rc|1  
GGCAGTCCCCAAGTTTCACTTGTTCCTGGGCAACGACTACTTGTCCAGTGTTACCTG  
>HPV1\_Mu\_9626063\_nt5961\_Genome\_Tile\_rc|1  
TCACCATCTTCTATGACAGACTCTATCATTTGCACCCTGGGGCAGTCCCCAAGTTTCACT  
>HPV1\_Mu\_9626063\_nt6041\_Genome\_Tile\_rc|1  
GAACAACATCTAAAGGGACATCAGACTTGTCTTGCTGTAAAGCAGCAAAATCCATAGCCC  
>HPV1\_Mu\_9626063\_nt6081\_Genome\_Tile\_rc|1  
TGGTTCATTCTGATATAATCAGGATATTTGCATGTTGCTTGAACAACATCTAAAGGGACA  
>HPV1\_Mu\_9626063\_nt6101\_Genome\_Tile\_rc|1  
TAGAGTTGCCATAGGCTTCATGGTTCATTCTGATATAATCAGGATATTTGCATGTTGCTT  
>HPV1\_Mu\_9626063\_nt6141\_Genome\_Tile\_rc|1  
TGCCTGGTATACATTTGCTCGCGACGTGCAAAAAAACATAGAGTTGCCATAGGCTTCA  
>HPV1\_Mu\_9626063\_nt6201\_Genome\_Tile\_rc|1  
AAATACAGGCTTTGTGGGACTGCCTCCTTATCACCCACCGAACCCCCGCGAGTAAAAAAG  
>HPV1\_Mu\_9626063\_nt6241\_Genome\_Tile\_rc|1  
TGTTGTTGCTAAAGTTGTTCTTGGTTCAGCATCTGCTGTTAAATACAGGCTTTGTGGGAC  
>HPV1\_Mu\_9626063\_nt6261\_Genome\_Tile\_rc|1  
CTTGGTGTGCTACATAATTTGTTGTTGCTAAAGTTGTTCTTGGTTCAGCATCTGCTGTT  
>HPV1\_Mu\_9626063\_nt6401\_Genome\_Tile\_rc|1  
ATAAACTTGTTCCTCTGGTATTATCTCCAACCTGTAATAAATAACTGGTTTCTCCAGCAAA  
>HPV1\_Mu\_9626063\_nt6421\_Genome\_Tile\_rc|1  
ATTGTTTTTTCATACTGATAGATAAACTTGTTCCTCTGGTATTATCTCCAACCTGTAATAAA  
>HPV1\_Mu\_9626063\_nt6441\_Genome\_Tile\_rc|1  
TTGGAATATGTAGTACTTGCATTGTTTTTCATACTGATAGATAAACTTGTTCCTCTGGTA  
>HPV1\_Mu\_9626063\_nt6461\_Genome\_Tile\_rc|1  
GAAATCATTAAATATTAGCATTGGAATATGTAGTACTTGCATTGTTTTTCATACTGATAG  
>HPV1\_Mu\_9626063\_nt6481\_Genome\_Tile\_rc|1  
AAATTCTTCAGTATGTCTTAGAAAATCATTAATAATTAGCATTGGAATATGTAGTACTTGC  
>HPV1\_Mu\_9626063\_nt6501\_Genome\_Tile\_rc|1  
TGAACATAAAAAGAAAGATCAAATCTTCAGTATGTCTTAGAAAATCATTAATAATTAGCA  
>HPV1\_Mu\_9626063\_nt6521\_Genome\_Tile\_rc|1  
TTAACTTTACTTTACAAAGCTGAACTATAAAAAGAAAGATCAAATCTTCAGTATGTCTTA  
>HPV1\_Mu\_9626063\_nt6541\_Genome\_Tile\_rc|1  
GTAGGCTAGATTTTCGGGAGTTAACTTTACTTTACAAAGCTGAACTATAAAAAGAAAGATC  
>HPV1\_Mu\_9626063\_nt6561\_Genome\_Tile\_rc|1  
TTAGGGTCCATTGTATGAATGTAGGCTAGATTTTCGGGAGTTAACTTTACTTTACAAAGC  
>HPV1\_Mu\_9626063\_nt6641\_Genome\_Tile\_rc|1  
AAGACCTAAAAACCTATATTGATCTTCTAGAGGATTGGTAGGTGGTTGAGATACAGATA  
>HPV1\_Mu\_9626063\_nt6661\_Genome\_Tile\_rc|1  
TGGACATTTTGCTGCCAAGGAAGACCTAAAAACCTATATTGATCTTCTAGAGGATTGGT  
>HPV1\_Mu\_9626063\_nt6701\_Genome\_Tile\_rc|1  
GACTATAAGGATCAGTCTGGGGCTCAGGAGGCGCCTGTTCTGGACATTTTGCTGCCAAGG  
>HPV1\_Mu\_9626063\_nt6721\_Genome\_Tile\_rc|1  
GACTTCCCAGAATTTATATTGACTATAAGGATCAGTCTGGGGCTCAGGAGGCGCCTGTTC  
>HPV1\_Mu\_9626063\_nt6741\_Genome\_Tile\_rc|1  
GACATCCTTTCTGTGAGATCGACTTCCCAGAATTTATATTGACTATAAGGATCAGTCTGG  
>HPV1\_Mu\_9626063\_nt6761\_Genome\_Tile\_rc|1  
GAAATTGGTCTAATTGTTTCGACATCCTTTCTGTGAGATCGACTTCCCAGAATTTATATT  
>HPV1\_Mu\_9626063\_nt6781\_Genome\_Tile\_rc|1  
TAGAAATTTCCCTTCTAGTGGAATTTGGTCTAATTGTTTCGGACATCCTTTCTGTGAGATC  
>HPV1\_Mu\_9626063\_nt6801\_Genome\_Tile\_rc|1  
TGTGTCATGCCACTTTGATATAGAAATTTCCCTTCTAGTGGAATTTGGTCTAATTGTTTCG  
>HPV1\_Mu\_9626063\_nt6821\_Genome\_Tile\_rc|1

TGGAAGTAGTAGCAGTACGTTGTGTCATGCCACTTTGATATAGAAATTCCTTCCTAGTG  
>HPV1\_Mu\_9626063\_nt6861\_Genome\_Tile\_rc|1  
TTGGCTGACGTAGATACACGCACTGTTTTGCGCTTTGTGGTGGAACTAGTAGCAGTACGT  
>HPV1\_Mu\_9626063\_nt6881\_Genome\_Tile\_rc|1  
ACTAAGCCTTACGCCTGCGCTTGGCTGACGTAGATACACGCACTGTTTTGCGCTTTGTGG  
>HPV1\_Mu\_9626063\_nt6901\_Genome\_Tile\_rc|1  
TATAGTTATATATAATATATACTAAGCCTTACGCCTGCGCTTGGCTGACGTAGATACACG  
>HPV1\_Mu\_9626063\_nt6921\_Genome\_Tile\_rc|1  
ATAAATAATCTACTAATAAATATAGTTATATATAATATATACTAAGCCTTACGCCTGCGC  
>HPV1\_Mu\_9626063\_nt6961\_Genome\_Tile\_rc|1  
CTAAACAAGTATAAAAAGTATAAAAATATAAAAATATATAATAAATAATCTACTAATAAA  
>HPV1\_Mu\_9626063\_nt6981\_Genome\_Tile\_rc|1  
TCTTACATGTCTATTTAGAACTAAACAAGTATAAAAAGTATAAAAATATAAAAATATATA  
>HPV1\_Mu\_9626063\_nt7001\_Genome\_Tile\_rc|1  
CCTACTTATACTAATGTAAATCTTACATGTCTATTTAGAACTAAACAAGTATAAAAAGTA  
>HPV1\_Mu\_9626063\_nt7021\_Genome\_Tile\_rc|1  
CTATTTTATGTAAATACATGCCTACTTATACTAATGTAAATCTTACATGTCTATTTAGAA  
>HPV1\_Mu\_9626063\_nt7041\_Genome\_Tile\_rc|1  
CTAATAAAAGGTTTCCAAGACTATTTTATGTAAATACATGCCTACTTATACTAATGTAAA  
>HPV1\_Mu\_9626063\_nt7061\_Genome\_Tile\_rc|1  
CTATTGTAAATGATGGTTCCTAATAAAAGGTTTCCAAGACTATTTTATGTAAATACATG  
>HPV1\_Mu\_9626063\_nt7081\_Genome\_Tile\_rc|1  
GCAGATGAACTATGATGTCCTACTATTGTAAATGATGGTTCCTAATAAAAGGTTTCCAAGA  
>HPV1\_Mu\_9626063\_nt7101\_Genome\_Tile\_rc|1  
AGAACGATGGAATAGCAATTGCAGATGAACTATGATGTCCTACTATTGTAAATGATGGTTCA  
>HPV1\_Mu\_9626063\_nt7121\_Genome\_Tile\_rc|1  
CACTACTGTAGAATATGTGAAGAACGATGGAATAGCAATTGCAGATGAACTATGATGTCA  
>HPV1\_Mu\_9626063\_nt7141\_Genome\_Tile\_rc|1  
TAGCAATACAATCTAGAGAACACTACTGTAGAATATGTGAAGAACGATGGAATAGCAATT  
>HPV1\_Mu\_9626063\_nt7161\_Genome\_Tile\_rc|1  
TTGTTTGCCTAACAGGAAAATAGCAATACAATCTAGAGAACACTACTGTAGAATATGTGA  
>HPV1\_Mu\_9626063\_nt7201\_Genome\_Tile\_rc|1  
TAAATGAAAGTGGGTTGTTTGGTCCATGTACAGATGTTGTTGTTTGCCTAACAGGAAAA  
>HPV1\_Mu\_9626063\_nt7221\_Genome\_Tile\_rc|1  
CTGGAATATATGCAGCACAATAAAATGAAAGTGGGTTGTTTGGTCCATGTACAGATGTTG  
>HPV1\_Mu\_9626063\_nt7241\_Genome\_Tile\_rc|1  
ACAAATAAATCCTCAACAATCTGGAATATATGCAGCACAATAAAATGAAAGTGGGTTGTT  
>HPV1\_Mu\_9626063\_nt7281\_Genome\_Tile\_rc|1  
ACAAAAAATGCACACTTGTGTATAATGCACCGGAGTCTAAACAAATAAATCCTCAACAAT  
>HPV1\_Mu\_9626063\_nt7321\_Genome\_Tile\_rc|1  
TGCATATTGCAGGAAAATAACACACAATCAATCAGAGAACACAAAAAATGCACACTTGTG  
>HPV1\_Mu\_9626063\_nt7341\_Genome\_Tile\_rc|1  
AAAGGACAGCTCACTTTTATTGCATATTGCAGGAAAATAACACACAATCAATCAGAGAAC  
>HPV1\_Mu\_9626063\_nt7381\_Genome\_Tile\_rc|1  
TAGGGATTTTTATTGGAGTAGGGAGGGATTAACAAAAGAAAGGACAGCTCACTTTTAT  
>HPV1\_Mu\_9626063\_nt7401\_Genome\_Tile\_rc|1  
GCACAAACAGATTTTAGGGGTAGGGATTTTTATTGGAGTAGGGAGGGATTAACAAAAG  
>HPV1\_Mu\_9626063\_nt7481\_Genome\_Tile\_rc|1  
ATACCATAAGGGATTAGCCACAACGGGTGCGGTGTTAATAGTACTTATTATATAAAAGAG  
>HPV1\_Mu\_9626063\_nt7501\_Genome\_Tile\_rc|1  
CTGTAGGTGTAGTCTTTTAAATACCATAAGGGATTAGCCACAACGGGTGCGGTGTTAATA  
>HPV1\_Mu\_9626063\_nt7521\_Genome\_Tile\_rc|1  
AACAAATGAAGACAATACATCCTGTAGGTGTAGTCTTTTAAATACCATAAGGGATTAGCCA  
>HPV1\_Mu\_9626063\_nt7581\_Genome\_Tile\_rc|1  
CCTAACCGCGGTTGGCAAACCGTCTTTGGGCAAACCGTCTTTGGAGCGCGGTAAACCATA

>HPV1\_Mu\_9626063\_nt7601\_Genome\_Tile\_rc|1  
GGCAGCAAATTTGAAACAAGTCCTAACCGCGGTTGGCAAACCGTCTTTGGGCAAACCGTCT  
>HPV1\_Mu\_9626063\_nt7621\_Genome\_Tile\_rc|1  
GAGCACGACCAGATAAGTTTTGGCAGCAAATTTGAAACAAGTCCTAACCGCGGTTGGCAAAC  
>HPV1\_Mu\_9626063\_nt7661\_Genome\_Tile\_rc|1  
ACACACCTACCGTTTTAGGTGCTTGGCAGGAAACCCGTTGGAGCACGACCAGATAAGTTT  
>HPV1\_Mu\_9626063\_nt7681\_Genome\_Tile\_rc|1  
TGTTAATTCTTGAAAAGAGTACACACCTACCGTTTTAGGTGCTTGGCAGGAAACCCGTTG  
>HPV2\_Alpha\_9626032\_nt3841\_Genome\_Tile\_rc|1  
TGAAATGTATTGGACCATATGTTTATACAAGCATGTAGGATTATACAAATGCAGACATAT  
>HPV2\_Alpha\_9626032\_nt4061\_Genome\_Tile\_rc|1  
AGCAGCAACGTATGGCGAAATAATAACGACTATGGTAAAAACAAAAGGCCTGCACATAT  
>HPV2\_Alpha\_9626032\_nt4081\_Genome\_Tile\_rc|1  
ATAGACTATGTATACAAGCTAGCAGCAACGTATGGCGAAATAATAACGACTATGGTAAAA  
>HPV2\_Alpha\_9626032\_nt4101\_Genome\_Tile\_rc|1  
AAATCTCACACAATGGGTATATAGACTATGTATACAAGCTAGCAGCAACGTATGGCGAAA  
>HPV2\_Alpha\_9626032\_nt4321\_Genome\_Tile\_rc|1  
AGCAAATACAAAAAAACACAAATGTATCAAAATGAAAATGTATCAAAACAATATAAAAA  
>HPV2\_Alpha\_9626032\_nt4621\_Genome\_Tile\_rc|1  
ATGATAACAGGCGCGCTGGGCGTTGGACCAATGTCAACTACAGTGGTGGGTCGCGAACCT  
>HPV2\_Alpha\_9626032\_nt4981\_Genome\_Tile\_rc|1  
CTACTGATAGGCTCTGTACCGCTGCCCCCGACGTGGCAAACGTCTGCATTGGTATTTCC  
>HPV2\_Alpha\_9626032\_nt5461\_Genome\_Tile\_rc|1  
CCGCGAGGGGCGGCGGGTAACCTCATCAAGCAATGGCTGAAGGACATCCGAATCAGCATAA  
>HPV2\_Alpha\_9626032\_nt7201\_Genome\_Tile\_rc|1  
GTTTTCTGTTTACTAGTGGGCGGCGTGGTCCCCGAAACAGCGGCGCGCTTGCAGACACGG  
>HPV2\_Alpha\_9626032\_nt7301\_Genome\_Tile\_rc|1  
ATAAGCACAAACAACATAAACATATTACAGACAACAAAATAATATGTAAAAAGTAGAA  
>HPVRTRX7\_Unclassified\_30315616\_nt0181\_Genome\_Tile\_rc|1  
TAGGTTTCTGTTGGTCTGGTGTAGTCTGCTGAGCCATTTGTCCCAATCACAGTTGCAAAA  
>HPVRTRX7\_Unclassified\_30315616\_nt0481\_Genome\_Tile\_rc|1  
TGATTTTCAATTCAAATATTGACTTTCTCTGTAGCTAGCTCTATATCTCTACCTAAAACCTG  
>HPVRTRX7\_Unclassified\_30315616\_nt0521\_Genome\_Tile\_rc|1  
TTTTCAATGGTGTCTCAAAATGATAAGCAAGTCTGACACCTGATTTTCAATTCAAATATT  
>HPVRTRX7\_Unclassified\_30315616\_nt3621\_Genome\_Tile\_rc|1  
TGCCTTCGGCTGGAGGTACTTCTGGGATTGTGATCTGGATTCTGACCTCCGACTCCTAGT  
>HPVRTRX7\_Unclassified\_30315616\_nt3761\_Genome\_Tile\_rc|1  
CTACAGCTCCTACTTCCTCTTTTCCCCCTCTGTCTCTCCCTCCCCGTTGTGACCGTTGGGAG  
>HPVRTRX7\_Unclassified\_30315616\_nt3781\_Genome\_Tile\_rc|1  
CTGTTCCCCTACCGCACCCCCTACAGCTCCTACTTCCTCTTTCCCCCTCTGTCTCTCCCTC  
>HPVRTRX7\_Unclassified\_30315616\_nt4281\_Genome\_Tile\_rc|1  
ATAAAAAAGTAAAAAATGTTAAACTATACTATTTCTGTAATGTTAGTGGTGTAGTAGC  
>HPVRTRX7\_Unclassified\_30315616\_nt4781\_Genome\_Tile\_rc|1  
GTATGGCACTTGAGCCTCTGCTGGTGGTCACAACAGGCGAGTCAACTATGGGACCTTCAG  
>HPVRTRX7\_Unclassified\_30315616\_nt5081\_Genome\_Tile\_rc|1  
GCCCCCTACGCCTGCCAATGGATAGTGCTCTTTGAAGTGGTGTGCTACTGCGCCGTGGTG  
>HPVRTRX7\_Unclassified\_30315616\_nt5101\_Genome\_Tile\_rc|1  
CCTTCTATTGTAGAGAAGGCCCCCTACGCCCTGCCAATGGATAGTGCTCTTTGAAGTGG  
>HPVRTRX7\_Unclassified\_30315616\_nt5161\_Genome\_Tile\_rc|1  
TACTAATTTGGATGGTCGAGAAACAAATAAAGGATTGTCTACTTGTACTTGCTGAACATA  
>HPVRTRX7\_Unclassified\_30315616\_nt5181\_Genome\_Tile\_rc|1  
GGATTATCAAAAAGCAAACCTTACTAATTTGGATGGTCGAGAAACAAATAAAGGATTGTCT  
>HPVRTRX7\_Unclassified\_30315616\_nt5301\_Genome\_Tile\_rc|1  
GGTGTGTTGAGTATTGGGGTCGTCCAGTTTGCGAATGTCTAAAAAATCCCTATCAGGG  
>HPVRTRX7\_Unclassified\_30315616\_nt5321\_Genome\_Tile\_rc|1

TTACCCTAACATAACCTGCAGGTGTTGTTGAGTATTGGGGTCGTCCCAGTTTGCGAATGT  
>HPVRTRX7\_Unclassified\_30315616\_nt5521\_Genome\_Tile\_rc|1  
ATTTTCTGCTGTATCCATGTCTATGAACGTACTTTCCACAGTACCTTGTATGATGGTCGC  
>HPVRTRX7\_Unclassified\_30315616\_nt5541\_Genome\_Tile\_rc|1  
TCAATACTCTCAGACAAAGGATTTTCTGCTGTATCCATGTCTATGAACGTACTTTCCACA  
>HPVRTRX7\_Unclassified\_30315616\_nt5781\_Genome\_Tile\_rc|1  
TGGGTATGAATGACCACCACGGGAATGTCTGGTGTAGGATAAATTATTTCTGCAGTATCT  
>HPVRTRX7\_Unclassified\_30315616\_nt5801\_Genome\_Tile\_rc|1  
AAAAGTCACCACTGCTATCATGGGTATGAATGACCACCACGGGAATGTCTGGTGTAGGAT  
>HPV90\_Alpha\_22138122\_nt0161\_Genome\_Tile\_rc|1  
GCCTTAGTTTCCCGGCTGCTTCCAGACACGCAGGACATGCTGCAAATGGAAAATGCTTTC  
>HPV90\_Alpha\_22138122\_nt0861\_Genome\_Tile\_rc|1  
GTCCATCCCCGGGATGCCTACTATTATCAATAAAATCAACCATGTCTGTCCGCTGTCAC  
>HPV90\_Alpha\_22138122\_nt1261\_Genome\_Tile\_rc|1  
TTACTTGTTTTAAGCAGAGACAGGATAGCATCTGTACCTGATTGTGCCGGTGTGTAAC  
>HPV90\_Alpha\_22138122\_nt2061\_Genome\_Tile\_rc|1  
TTGGTATGCCTTTTAAAAAGTTTTCAGCGATATTACAAAGGTAATAAACTCTATGTCGT  
>HPV90\_Alpha\_22138122\_nt3641\_Genome\_Tile\_rc|1  
AAGGTTATGGTTGATAGGAAGGTTGCCCTTGTTCGCACTATCATGCCACAGGGTTACA  
>HPV90\_Alpha\_22138122\_nt3661\_Genome\_Tile\_rc|1  
CTGCTTCAATGTCTTTAGGTAAGGTTATGGTTGATAGGAAGGTTGCCCTTGTTCGCGAC  
>HPV90\_Alpha\_22138122\_nt3681\_Genome\_Tile\_rc|1  
CATAGTCATGTACCCCAGTACTGCTTCAATGTCTTTAGGTAAGGTTATGGTTGATAGGAA  
>HPV90\_Alpha\_22138122\_nt3721\_Genome\_Tile\_rc|1  
AGTTTACATATATTTACAATATACCAGTATATTATGCTAACATAGTCATGTACCCCAGTA  
>HPV90\_Alpha\_22138122\_nt3741\_Genome\_Tile\_rc|1  
TAACGTTCCGCACTGTACACAGTTTACATATATTTACAATATACCAGTATATTATGCTAA  
>HPV90\_Alpha\_22138122\_nt3761\_Genome\_Tile\_rc|1  
TGTATACAACAGATGTCCCTTAACGTTCCGCACTGTACACAGTTTACATATATTTACAAT  
>HPV90\_Alpha\_22138122\_nt3821\_Genome\_Tile\_rc|1  
AGATTAGTATTAGCAGCAGTTGTGTCCAGGCAGACAAGTAGCAAATAAAGGCTCCACAC  
>HPV90\_Alpha\_22138122\_nt3841\_Genome\_Tile\_rc|1  
AAGGATAGACAGCCAAAAGAAGATTAGTATTAGCAGCAGTTGTGTCCAGGCAGACAAGTA  
>HPV90\_Alpha\_22138122\_nt3901\_Genome\_Tile\_rc|1  
TATGATCAGGAGGCCTAGAAACACAGTAAGGAATACAATAAGAAAAGCAGTAACGCCAGG  
>HPV90\_Alpha\_22138122\_nt4061\_Genome\_Tile\_rc|1  
ACTACAGGATATTCCCCCATCTCTATCACGTACTACAACAGGATACATACTACTATTG  
>HPV90\_Alpha\_22138122\_nt4161\_Genome\_Tile\_rc|1  
AGGTAACACTGCAACAGACGCAGGTAAAAAATAAACAAAATAAGACACACGAAAAGCAA  
>HPV90\_Alpha\_22138122\_nt4181\_Genome\_Tile\_rc|1  
ACATATAGGTACAATGGGTAAGGTAACACTGCAACAGACGCAGGTAAAAAATAAACAAA  
>HPV90\_Alpha\_22138122\_nt4201\_Genome\_Tile\_rc|1  
ACATACACTGTGTATACAATACATATAGGTACAATGGGTAAGGTAACACTGCAACAGAC  
>HPV90\_Alpha\_22138122\_nt4221\_Genome\_Tile\_rc|1  
CAAACCCACTACATGTGTCTACATACACTGTGTATACAATACATATAGGTACAATGGGTA  
>HPV90\_Alpha\_22138122\_nt4261\_Genome\_Tile\_rc|1  
TATAATGAATACCCACACCCAATAAATGTATGACACCCACAAACCCACTACATGTGTCT  
>HPV90\_Alpha\_22138122\_nt4281\_Genome\_Tile\_rc|1  
AAAACACCAACCACACCCTATAATGAATACCCACACCCAATAAATGTATGACACCCA  
>HPV90\_Alpha\_22138122\_nt4481\_Genome\_Tile\_rc|1  
ATTGCAGGATTTGTCTGCAAGTGTGGTGTGTTCCACCTTATTGATCACATCGGAGGGAC  
>HPV90\_Alpha\_22138122\_nt4701\_Genome\_Tile\_rc|1  
TGGGGAGAGCCCGATGCAATTATGCTGGAATCCTCCACCAATGTGACAATAGAAGGATCG  
>HPV90\_Alpha\_22138122\_nt5081\_Genome\_Tile\_rc|1  
CAGGCTGTGATAAAAACCTGGGGTCTGTACATGTACTTGTGGTATGCCCTGCTGTACA



>HPV90\_Alpha\_22138122\_nt5101\_Genome\_Tile\_rc|1  
GTCATAGGTAACAAGTGTTCAGGCTGTGATAAAACCTGGGGTCCTGTACATGTACTTG  
>HPV90\_Alpha\_22138122\_nt5161\_Genome\_Tile\_rc|1  
GACCTGATGAATACTAGGATGCTCAAATAGTATGGTTTCCTCTGTGTCAAATACAGGATT  
>HPV90\_Alpha\_22138122\_nt5361\_Genome\_Tile\_rc|1  
AAAGGTTGCATTTCCAGCTCGTCAGCAACAGGTGCAATAGGGCTTAAATCCTGATAAAAA  
>HPV90\_Alpha\_22138122\_nt5381\_Genome\_Tile\_rc|1  
AATCAGGAGTGTCAGAAACCAAAGGTTGCATTTCCAGCTCGTCAGCAACAGGTGCAATAG  
>HPV90\_Alpha\_22138122\_nt5461\_Genome\_Tile\_rc|1  
GGAGGGGCGTGTAGGGGTCAAGGTGCGGTGACGGGACACAGAAGCAGTGTCAGCATATAT  
>HPV90\_Alpha\_22138122\_nt5481\_Genome\_Tile\_rc|1  
GATGGAGCCTGTAAAGGTGTGGAGGGGCGTGTAGGGGTCAAGGTGCGGTGACGGGACACA  
>HPV90\_Alpha\_22138122\_nt5521\_Genome\_Tile\_rc|1  
ATTGGATGCTGCAGATGATAGGGCAGACGATGCAGTCACTGATGGAGCCTGTAAAGGTGT  
>HPV90\_Alpha\_22138122\_nt5541\_Genome\_Tile\_rc|1  
GTAGATAGAGGCACAGTGGTATTGGATGCTGCAGATGATAGGGCAGACGATGCAGTCACT  
>HPV90\_Alpha\_22138122\_nt5561\_Genome\_Tile\_rc|1  
AGACAGGAATATCCAGGCCTGTAGATAGAGGCACAGTGGTATTGGATGCTGCAGATGATA  
>HPV90\_Alpha\_22138122\_nt5581\_Genome\_Tile\_rc|1  
GGCACTGTCAGGCCCACTAAAGACAGGAATATCCAGGCCTGTAGATAGAGGCACAGTGGT  
>HPV90\_Alpha\_22138122\_nt5701\_Genome\_Tile\_rc|1  
TTTAGGTAGCAAACCTAATGGGGGCAACAAATAATATGTGGACCCATTTACAAGAACAGA  
>HPV90\_Alpha\_22138122\_nt6261\_Genome\_Tile\_rc|1  
TGCATGGGGTACCCTTTGCCCAGTGCTCGCCTAAAGGAGGTTTGACCCCTATAATAAATA  
>HPV90\_Alpha\_22138122\_nt6301\_Genome\_Tile\_rc|1  
TCTATAGGAGGGCAATCCCCAGCCTGTACATTAGACATATTGCATGGGGTACCCTTTGCC  
>HPV90\_Alpha\_22138122\_nt6561\_Genome\_Tile\_rc|1  
CAAAGCCATCGGGAATTGCGTCGCCCATAGTACCTGCTCTGTTATAAAAGTGCCTTATAA  
>HPV90\_Alpha\_22138122\_nt6581\_Genome\_Tile\_rc|1  
AGAAGATGTTCCCTTTTAGCACAAAGCCATCGGGAATTGCGTCGCCCATAGTACCTGCTCT  
>HPV90\_Alpha\_22138122\_nt6601\_Genome\_Tile\_rc|1  
GTAGGAGTGCCACGAGAGGTAGAAGATGTTCCCTTTTAGCACAAAGCCATCGGGAATTGCG  
>HPV90\_Alpha\_22138122\_nt7261\_Genome\_Tile\_rc|1  
ACATAACATGCTTAGGAACGTTTGGACCGTTTACGTTTTGTAGAGGGGGCGGTAGAGGGT  
>HPV90\_Alpha\_22138122\_nt7321\_Genome\_Tile\_rc|1  
CACAACAGTACAAGGAACCCGTGTACAGACACAGTAAACATCAGCATACAACAGACACAC  
>HPV90\_Alpha\_22138122\_nt7501\_Genome\_Tile\_rc|1  
GGTATTAAAGGCTAGGGGACGGCCGGGTACATACAGGACACCACACATATATGTTATGT  
>HPV90\_Alpha\_22138122\_nt7701\_Genome\_Tile\_rc|1  
ATTTATTGGAGTGTGAGTAACACAGACAAATAAATATTGTGAAAGAAATGTATAGCTGGCC  
>HPV90\_Alpha\_22138122\_nt7821\_Genome\_Tile\_rc|1  
CATGTTTGAAGTTGTACAGTAGGATTTACAAGACACATTGTTGAATAGAAAAGCAAATTT  
>HPV54\_Alpha\_9628437\_nt0061\_Genome\_Tile\_rc|1  
GGGGTTTCAGTAGCAGACATTGCCCCCAAATAACTGTTTTCTACAACCGCTTTTATATGTA  
>HPV54\_Alpha\_9628437\_nt0141\_Genome\_Tile\_rc|1  
GGCACAAGGAAGTTGCAAACCTATGCATAGGAATATTGCATACCTTGCACAAATCAGCTAG  
>HPV54\_Alpha\_9628437\_nt0161\_Genome\_Tile\_rc|1  
CACACCGTCTTCTTGCAAAAGGCACAAGGAAGTTGCAAACCTATGCATAGGAATATTGCAT  
>HPV54\_Alpha\_9628437\_nt0181\_Genome\_Tile\_rc|1  
ATGCATAAATCTCTGCTGTACACACCGTCTTCTTGCAAAAGGCACAAGGAAGTTGCAAAC  
>HPV54\_Alpha\_9628437\_nt0201\_Genome\_Tile\_rc|1  
AAATAGGTCCCTTATATTGAAATGCATAAATCTCTGCTGTACACACCGTCTTCTTGCAAAA  
>HPV54\_Alpha\_9628437\_nt0221\_Genome\_Tile\_rc|1  
AAGCCGTGCTCCACACCACAAATAGGTCCCTTATATTGAAATGCATAAATCTCTGCTGTA  
>HPV54\_Alpha\_9628437\_nt0281\_Genome\_Tile\_rc|1

TGCCTTCTATAATTTATTTGCCCGTGCAGTTCTAGGCACAGTGCACATGCAGCATGTGGA  
>HPV54\_Alpha\_9628437\_nt0321\_Genome\_Tile\_rc|1  
CTCTTGTTCCACTGTTTCCCACAGGCACGCACGGTCGCGATGCCTTCTATAATTTATTTG  
>HPV54\_Alpha\_9628437\_nt0441\_Genome\_Tile\_rc|1  
ATAGCCTCTAACACAGTGAATCGCCTGTTGTAATCTACGTGCCGTTGCTTTTCCACGTT  
>HPV54\_Alpha\_9628437\_nt0461\_Genome\_Tile\_rc|1  
TG TAGACACCTACCCTTCCAATAGCCTCTAACACAGTGAATCGCCTGTTGTAATCTACG  
>HPV54\_Alpha\_9628437\_nt0481\_Genome\_Tile\_rc|1  
TGCATTATGGCTTCCAGCAATGTAGACACCTACCCTTCCAATAGCCTCTAACACAGTGA  
>HPV54\_Alpha\_9628437\_nt0541\_Genome\_Tile\_rc|1  
AGGTCAAACGGTTCTGGTTTTAAATCAAGGACTATATCCTCAATTGTAGCCACATTTCCA  
>HPV54\_Alpha\_9628437\_nt0561\_Genome\_Tile\_rc|1  
CTAATTGCTCCCTGCAGTACAGGTCAAACGGTTCTGGTTTTAAATCAAGGACTATATCCT  
>HPV54\_Alpha\_9628437\_nt0621\_Genome\_Tile\_rc|1  
CCTTAAATGCTTGTGTTGTGTCAGGTTGTGTTACTGCTGTCTCATCTTCTGCATCAGAGTCTT  
>HPV54\_Alpha\_9628437\_nt0641\_Genome\_Tile\_rc|1  
ACCTCCACACTGGCTTAACACCTTAAATGCTTGTGTTGTGTCAGGTTGTGTTACTGCTGTCTC  
>HPV54\_Alpha\_9628437\_nt0661\_Genome\_Tile\_rc|1  
CGTACTGTCTTACAACACACACCTCCACACTGGCTTAACACCTTAAATGCTTGTGTTGTCA  
>HPV54\_Alpha\_9628437\_nt0681\_Genome\_Tile\_rc|1  
GCGTGCTATACACACATAGCCGTACTGTCTTACAACACACACCTCCACACTGGCTTAACA  
>HPV54\_Alpha\_9628437\_nt0701\_Genome\_Tile\_rc|1  
CAGTACCCTTATGCCTGTGTGCGTGCTATACACACATAGCCGTACTGTCTTACAACACAC  
>HPV54\_Alpha\_9628437\_nt0721\_Genome\_Tile\_rc|1  
TCCTGATGAAGCAGTTCCTGCAGTACCCTTATGCCTGTGTGCGTGCTATACACACATAGC  
>HPV54\_Alpha\_9628437\_nt0741\_Genome\_Tile\_rc|1  
GACACACTATTTGCAGTGCCTGCTGATGAAGCAGTTCCTGCAGTACCCTTATGCCTGTGT  
>HPV54\_Alpha\_9628437\_nt0961\_Genome\_Tile\_rc|1  
GTGGATTTTCCTGCCCTCTACCTGTGACACACTATTATCAATAAAGTCCACCATATCAA  
>HPV54\_Alpha\_9628437\_nt0981\_Genome\_Tile\_rc|1  
TTGGGCATGTAACAATGCCTGTGGATTTTCCTGCCCTCTACCTGTGACACACTATTATC  
>HPV54\_Alpha\_9628437\_nt1001\_Genome\_Tile\_rc|1  
TCTACATCTGCCTGCAGCTGTTGGGCATGTAACAATGCCTGTGGATTTTCCTGCCCTCT  
>HPV54\_Alpha\_9628437\_nt1021\_Genome\_Tile\_rc|1  
GTTTTAATTGTTGCACTGCCTCTACATCTGCCTGCAGCTGTTGGGCATGTAACAATGCCT  
>HPV54\_Alpha\_9628437\_nt1101\_Genome\_Tile\_rc|1  
TAGCCGGGGGCTTAGGTCCTTTTCTACACAGGGTTCGCTGTTTGCAACAGGACTTACATA  
>HPV54\_Alpha\_9628437\_nt1121\_Genome\_Tile\_rc|1  
CGTCCTAGGGATATAGCCCCTAGCCGGGGGCTTAGGTCCTTTTCTACACAGGGTTCGCTG  
>HPV54\_Alpha\_9628437\_nt1161\_Genome\_Tile\_rc|1  
GGCCTTATCAAACAGCCGTCGTTTGGCTTTGGCTGACCGCCGTCCTAGGGATATAGCCCC  
>HPV54\_Alpha\_9628437\_nt1221\_Genome\_Tile\_rc|1  
CCCCTCGGTATTTACCTCCACCGCAGCTTCCACGTCAGTATGGCCATTTGGCGGCGGTTG  
>HPV54\_Alpha\_9628437\_nt1241\_Genome\_Tile\_rc|1  
TCTGTCTCTGTTTCATCTGTCCCTCGGTATTTACCTCCACCGCAGCTTCCACGTCAGTA  
>HPV54\_Alpha\_9628437\_nt1261\_Genome\_Tile\_rc|1  
CAGATACTGTCTGCACCTGGTCTGTCTCTGTTTCATCTGTCCCTCGGTATTTACCTCCA  
>HPV54\_Alpha\_9628437\_nt1281\_Genome\_Tile\_rc|1  
GCTATCTGTAGTTGTTTCCCCAGATACTGTCTGCACCTGGTCTGTCTCTGTTTCATCTGT  
>HPV54\_Alpha\_9628437\_nt1321\_Genome\_Tile\_rc|1  
TTGTGTTATGTATTAATTCTGTAATTTGCTGCCTTCCTAGGCTATCTGTAGTTGTTTCCC  
>HPV54\_Alpha\_9628437\_nt1341\_Genome\_Tile\_rc|1  
AAACAATGCTACACGAATATTTGTGTTATGTATTAATTCTGTAATTTGCTGCCTTCCTAG  
>HPV54\_Alpha\_9628437\_nt1361\_Genome\_Tile\_rc|1  
TATAGGTCTTTAAACATACCAAACAATGCTACACGAATATTTGTGTTATGTATTAATTCT

>HPV54\_Alpha\_9628437\_nt1381\_Genome\_Tile\_rc|1  
GGTCCATAAACTTAATCCATATAGGTCTTTAAACATACCAAACAATGCTACACGAATAT  
>HPV54\_Alpha\_9628437\_nt1521\_Genome\_Tile\_rc|1  
TGTTAGCCATTGGATATGGCCATACAAACAATGTGGCTCTAGCAATGTTTAAATCCATC  
>HPV54\_Alpha\_9628437\_nt1601\_Genome\_Tile\_rc|1  
CCTAAACATTTACTTACTGTTAATCTGTTTTTGCCACATTTAAATCTTGTTAATAATAAT  
>HPV54\_Alpha\_9628437\_nt1641\_Genome\_Tile\_rc|1  
ATCTATTAACATTTGGGTTTTCTGGTATATTTAATAACATTCCTAAACATTTACTTACTGT  
>HPV54\_Alpha\_9628437\_nt1761\_Genome\_Tile\_rc|1  
ATATTCAATTACAGTTTGTCTGGCCAGCCATTCCGGGGGTGTACCAAATATTTCACTTGC  
>HPV54\_Alpha\_9628437\_nt1801\_Genome\_Tile\_rc|1  
GTACCATTTTAGATAAATCAAACCTGGCTGTCTGCTAAGCTATATTCAATTACAGTTTGTG  
>HPV54\_Alpha\_9628437\_nt1881\_Genome\_Tile\_rc|1  
ATTTTCATCTATATCAGCTAATTTAGCATATTCAGGGCAATAATACTGTCATCAATATA  
>HPV54\_Alpha\_9628437\_nt1901\_Genome\_Tile\_rc|1  
CTTCCTAGAAAGGCAGCCGATTTTCATCTATATCAGCTAATTTAGCATATTCAGGGCA  
>HPV54\_Alpha\_9628437\_nt2041\_Genome\_Tile\_rc|1  
TTTCCTTCCACTCACCTTCCTCCTCTACTAAATCACAACGATGTTTAATCCATTGTGACA  
>HPV54\_Alpha\_9628437\_nt2081\_Genome\_Tile\_rc|1  
GATATAAAATCCACATGTTGATATCTAAGGAATCGTACTATTTCCCTTCCACTCACCTTCC  
>HPV54\_Alpha\_9628437\_nt2101\_Genome\_Tile\_rc|1  
GTTTTAATGCTATCATAAAAGATATAAAATCCACATGTTGATATCTAAGGAATCGTACTA  
>HPV54\_Alpha\_9628437\_nt2121\_Genome\_Tile\_rc|1  
TGGTATGCCCTTGTAATAATGTTTTAATGCTATCATAAAAGATATAAAATCCACATGTTG  
>HPV54\_Alpha\_9628437\_nt2221\_Genome\_Tile\_rc|1  
CATATGATAGCACTACACCTCCTAAAAAGCTAATTAACTCATGGCAAAATTAGATTTTC  
>HPV54\_Alpha\_9628437\_nt2421\_Genome\_Tile\_rc|1  
TATGTTGGAGGTCACTATTAGTGGAGGACATTTTGTGTTGCACCATAGCTCGATGTTTTCT  
>HPV54\_Alpha\_9628437\_nt2441\_Genome\_Tile\_rc|1  
CTGTGCTGTACTAGCATTTATGTTGGAGGTCACTATTAGTGGAGGACATTTTGTGTTGC  
>HPV54\_Alpha\_9628437\_nt2461\_Genome\_Tile\_rc|1  
TACTGTGTAGGTAGCGCCATCTGTGCTGTACTAGCATTTATGTTGGAGGTCACTATTA  
>HPV54\_Alpha\_9628437\_nt2501\_Genome\_Tile\_rc|1  
TCAAATGGAAATCTATTGGGAAAACAAAACATTTTACTCTACTGTGTAGGTAGCGCCAT  
>HPV54\_Alpha\_9628437\_nt2521\_Genome\_Tile\_rc|1  
ACACAGGGTTTCCATTACTATCAAATGGAAATCTATTGGGAAAACAAAACATTTTACTC  
>HPV54\_Alpha\_9628437\_nt2541\_Genome\_Tile\_rc|1  
ATTTTTATTACTTAAATCATACACAGGGTTTCCATTACTATCAAATGGAAATCTATTGGG  
>HPV54\_Alpha\_9628437\_nt2561\_Genome\_Tile\_rc|1  
CTTTTAAAGAATGATTTCCAATTTTATTACTTAAATCATACACAGGGTTTCCATTACTA  
>HPV54\_Alpha\_9628437\_nt2581\_Genome\_Tile\_rc|1  
GCGCTAAACGTGACCATGACCTTTTAAAGAATGATTTCCAATTTTATTACTTAAATCAT  
>HPV54\_Alpha\_9628437\_nt2601\_Genome\_Tile\_rc|1  
CTCGTTATCGTTGTCGTTTCAGCGCTAAACGTGACCATGACCTTTTAAAGAATGATTTCCA  
>HPV54\_Alpha\_9628437\_nt2741\_Genome\_Tile\_rc|1  
ATTGCAATGCACACTCCAGGCGTATGCATTTCCAATGTTCTATTTGGTCCTCTAGTTTAT  
>HPV54\_Alpha\_9628437\_nt2881\_Genome\_Tile\_rc|1  
TTCGGTGCTGTATACTGTCTTTTGCAATGTCTCTAATGCAAGTTGCAGTTCAATGGCCTT  
>HPV54\_Alpha\_9628437\_nt2961\_Genome\_Tile\_rc|1  
ACTGTTTGTCCACGTCTTTTTAAGCAACCAGTTGGTGGTGCATTCCACCGTTCCAGGCAT  
>HPV54\_Alpha\_9628437\_nt2981\_Genome\_Tile\_rc|1  
GCCCATCAAATATAACATCTACTGTTTGTCCACGTCTTTTAAAGCAACCAGTTGGTGGTG  
>HPV54\_Alpha\_9628437\_nt3001\_Genome\_Tile\_rc|1  
TTGCATTGTGTTATCCTGATGCCCATCAAATATAACATCTACTGTTTGTCCACGTCTTTT  
>HPV54\_Alpha\_9628437\_nt3021\_Genome\_Tile\_rc|1

ATATCTCCCCACATTACATATTGCATTGTGTTATCCTGATGCCCATCAAATATAACATCT  
>HPV54\_Alpha\_9628437\_nt3041\_Genome\_Tile\_rc|1  
CATCACAGTTTTTGATAATAAATATCTCCCCACATTACATATTGCATTGTGTTATCCTGAT  
>HPV54\_Alpha\_9628437\_nt3061\_Genome\_Tile\_rc|1  
CACCTTAGTCCATCCCTCCCCATCACAGTTTTTGATAATAAATATCTCCCCACATTACATA  
>HPV54\_Alpha\_9628437\_nt3081\_Genome\_Tile\_rc|1  
ATTGCATCTATATTACTGCACACCTTAGTCCATCCCTCCCCATCACAGTTTTTGATAATAA  
>HPV54\_Alpha\_9628437\_nt3101\_Genome\_Tile\_rc|1  
CATCCATATAATAAATACCCATTGCATCTATATTACTGCACACCTTAGTCCATCCCTCCC  
>HPV54\_Alpha\_9628437\_nt3121\_Genome\_Tile\_rc|1  
ATAATACACTTTGTGTTCTGCATCCATATAATAAATACCCATTGCATCTATATTACTGCA  
>HPV54\_Alpha\_9628437\_nt3141\_Genome\_Tile\_rc|1  
GCTTCCTTTTTTAAAATCCACATAATACACTTTGTGTTCTGCATCCATATAATAAATACCC  
>HPV54\_Alpha\_9628437\_nt3161\_Genome\_Tile\_rc|1  
CATATTCCCCATACTTAGATGCTTCCTTTTTTAAAATCCACATAATACACTTTGTGTTCTG  
>HPV54\_Alpha\_9628437\_nt3181\_Genome\_Tile\_rc|1  
CATACGCACCTCCCACTGTCCATATTCCCATACTTAGATGCTTCCTTTTTTAAAATCCAC  
>HPV54\_Alpha\_9628437\_nt3201\_Genome\_Tile\_rc|1  
GAAAAAATGATGCTGCTGCCCATACGCACCTCCCACTGTCCATATTCCCCATACTTAGAT  
>HPV54\_Alpha\_9628437\_nt3281\_Genome\_Tile\_rc|1  
AATTGGCTGGTCTGGTGTGTTTCAGCAGTGCCAGTAGAGGATATTGACAATGCCTCTTCGG  
>HPV54\_Alpha\_9628437\_nt3321\_Genome\_Tile\_rc|1  
CACGGGATTGCTTTTTGTGGAGTTGTTCGGTACGTGGTGTGGAATTGGCTGGTCTGGTGTGT  
>HPV54\_Alpha\_9628437\_nt3341\_Genome\_Tile\_rc|1  
GTTTTCTAGGCGGCGGCGTGCACGGGATTGCTTTTTGTGGAGTTGTTCGGTACGTGGTGTGG  
>HPV54\_Alpha\_9628437\_nt3401\_Genome\_Tile\_rc|1  
CACAGCCACGGGGTCTGAGGTGCTGTGTGGTTGCTGGTCTGTGCTGTAGACTCTAGCTC  
>HPV54\_Alpha\_9628437\_nt3441\_Genome\_Tile\_rc|1  
TGGTTCTTGTGTTATCGTCACTGATGTGCCTGTCGTTGTCACAGCCACGGGGTCTGAG  
>HPV54\_Alpha\_9628437\_nt3461\_Genome\_Tile\_rc|1  
CACTACTGTGTGCCGTCCTTGTTCTTGTGTTATCGTCACTGATGTGCCTGTCGTTGT  
>HPV54\_Alpha\_9628437\_nt3541\_Genome\_Tile\_rc|1  
TTTATACTTTTGTATTCTTTGCCTAAAACATTTTAAATGTATTAGGTTACCTTTAAAGTG  
>HPV54\_Alpha\_9628437\_nt3621\_Genome\_Tile\_rc|1  
AATGTTACAATGCCCTATTCTTAGTGGTACCTGGTACACATGCCCAATGCCATGTTGAG  
>HPV54\_Alpha\_9628437\_nt3641\_Genome\_Tile\_rc|1  
GTTCTACACTACTATAGGTTAATGTTACAATGCCCTATTCTTAGTGGTACCTGGTACAC  
>HPV54\_Alpha\_9628437\_nt3661\_Genome\_Tile\_rc|1  
TACTAAAAATTGTTGCCTTTGTTCTACACTACTATAGGTTAATGTTACAATGCCCTATT  
>HPV54\_Alpha\_9628437\_nt3681\_Genome\_Tile\_rc|1  
CTAGGTGGAATGCGAACAGTTACTAAAAATTGTTGCCTTTGTTCTACACTACTATAGGTT  
>HPV54\_Alpha\_9628437\_nt3701\_Genome\_Tile\_rc|1  
CCCCTAATGACATAGATATACTAGGTGGAATGCGAACAGTTACTAAAAATTGTTGCCTTT  
>HPV54\_Alpha\_9628437\_nt3741\_Genome\_Tile\_rc|1  
ATCACAACTTTACAATGATTATCTGTTATAATGACATTACCCCTAATGACATAGATATA  
>HPV54\_Alpha\_9628437\_nt3761\_Genome\_Tile\_rc|1  
TTTACAATATAGTATGTACAATCACAACTTTACAATGATTATCTGTTATAATGACATTA  
>HPV54\_Alpha\_9628437\_nt3881\_Genome\_Tile\_rc|1  
TACACTACACACACCTACACACACCTCACCTCAGTCACTGCAGGCCTGCATGCACTCA  
>HPV54\_Alpha\_9628437\_nt3901\_Genome\_Tile\_rc|1  
TATACAACATTATTACTGCATACACTACACACACCTACACACACCTCACCTCAGTCAC  
>HPV54\_Alpha\_9628437\_nt3941\_Genome\_Tile\_rc|1  
AACATGGATAATAAAAACCAACATGTTAACCAACTTACTGTATACAACATTATTACTGCA  
>HPV54\_Alpha\_9628437\_nt3961\_Genome\_Tile\_rc|1  
TTGTAATACATTGCCATAATAACATGGATAATAAAAACCAACATGTTAACCAACTTACTG

>HPV54\_Alpha\_9628437\_nt3981\_Genome\_Tile\_rc|1  
AAGAAAAAAGTAAATGCTGTTGTAATACATTGCCATAATAACATGGATAATAAAAAACCA  
>HPV54\_Alpha\_9628437\_nt4001\_Genome\_Tile\_rc|1  
CACAAATAGAATAAAGGCTACAAGAAAAAAGTAAATGCTGTTGTAATACATTGCCATAAT  
>HPV54\_Alpha\_9628437\_nt4021\_Genome\_Tile\_rc|1  
AAACACACAGGGCAGGTACCCACAATAGAATAAAGGCTACAAGAAAAAAGTAAATGCTG  
>HPV54\_Alpha\_9628437\_nt4041\_Genome\_Tile\_rc|1  
AAGCCTGGCAAGGCGCACATAAACACACAGGGCAGGTACCCACAATAGAATAAAGGCTAC  
>HPV54\_Alpha\_9628437\_nt4061\_Genome\_Tile\_rc|1  
AAGTGAAGGTCAAGTTCAGAAGCCTGGCAAGGCGCACATAAACACACAGGGCAGGTACC  
>HPV54\_Alpha\_9628437\_nt4101\_Genome\_Tile\_rc|1  
AGGGCATCCACAGTAGGTGTGCACAGTAACACCTTATGTAAAGTGAAGGTCAAGTTCAG  
>HPV54\_Alpha\_9628437\_nt4121\_Genome\_Tile\_rc|1  
CTATGGTAAGCAGGTTACACAGGGCATCCACAGTAGGTGTGCACAGTAACACCTTATGTA  
>HPV54\_Alpha\_9628437\_nt4141\_Genome\_Tile\_rc|1  
TCTACACAATATTTATTATACTATGGTAAGCAGGTTACACAGGGCATCCACAGTAGGTGT  
>HPV54\_Alpha\_9628437\_nt4161\_Genome\_Tile\_rc|1  
AGCCATAATACACAAATATATCTACACAATATTTATTATACTATGGTAAGCAGGTTACAC  
>HPV54\_Alpha\_9628437\_nt4401\_Genome\_Tile\_rc|1  
TTCAAGGGTAGTAGAGGGTCGTCCAAGTGGTATATACCCTGTGCGGCCCCCTGTGCCACT  
>HPV54\_Alpha\_9628437\_nt4421\_Genome\_Tile\_rc|1  
GGACGTACAGGAGGACCTGGTTCAAGGGTAGTAGAGGGTCGTCCAAGTGGTATATACCCT  
>HPV54\_Alpha\_9628437\_nt4461\_Genome\_Tile\_rc|1  
GGAAGGGTCAGAGGGTGCTACTGTTTCTACAGCCCCTGCGGGACGTACAGGAGGACCTGG  
>HPV54\_Alpha\_9628437\_nt4521\_Genome\_Tile\_rc|1  
AATGGTAGGGGTGGTGCCCCAACATCCACAACACTAGATTCCTCTACTAAAGACACAAT  
>HPV54\_Alpha\_9628437\_nt4621\_Genome\_Tile\_rc|1  
ATGTTATAGACACCCTAATAGGGGTGGTAGTGGAGGTGACATCTAATATAGCAGGGGTAG  
>HPV54\_Alpha\_9628437\_nt4641\_Genome\_Tile\_rc|1  
ATATATAGGATTATCATGGGATGTTATAGACACCCTAATAGGGGTGGTAGTGGAGGTGAC  
>HPV54\_Alpha\_9628437\_nt4661\_Genome\_Tile\_rc|1  
TCTAATAATGATGGCTCTGTATATATAGGATTATCATGGGATGTTATAGACACCCTAATA  
>HPV54\_Alpha\_9628437\_nt4741\_Genome\_Tile\_rc|1  
GTATATTTTCAGCAGTGGACGATTGCAAAGTAGAGGTAGATACTAAAACACGACCATCCA  
>HPV54\_Alpha\_9628437\_nt4761\_Genome\_Tile\_rc|1  
AATTATAAAAGTGTCCATAGGTATATTTTCAGCAGTGGACGATTGCAAAGTAGAGGTAGA  
>HPV54\_Alpha\_9628437\_nt4801\_Genome\_Tile\_rc|1  
GTATAGGTGTGCTAGTTGTTGTGCCTATATGGTCCTGCATAATTATAAAAGTGTCCATAG  
>HPV54\_Alpha\_9628437\_nt4841\_Genome\_Tile\_rc|1  
CGGGAATATAAACCTAAGCGTGGGCGTGACAGGCGCCTTGGTATAGGTGTGCTAGTTGTT  
>HPV54\_Alpha\_9628437\_nt4901\_Genome\_Tile\_rc|1  
ATAAGACTGGAAGGCTGTTGTAAAAAGGCAGGGTCCTGTACAGGCACTTGCTGTAACGCA  
>HPV54\_Alpha\_9628437\_nt5081\_Genome\_Tile\_rc|1  
TGTAATGTGGCCCTGTCGCCCACCCTACTATAACGTACAACCCCCCTACGAGTTGTAAGT  
>HPV54\_Alpha\_9628437\_nt5161\_Genome\_Tile\_rc|1  
TTTCCTCAGGGACATGAGCAATAGGGCTTAAGTCCTGAAAAAATGCACACGAGGTTTAA  
>HPV54\_Alpha\_9628437\_nt5181\_Genome\_Tile\_rc|1  
TATTAAAGGGTGTAATTCTATTTCCCTCAGGGACATGAGCAATAGGGCTTAAGTCCTGAAA  
>HPV54\_Alpha\_9628437\_nt5221\_Genome\_Tile\_rc|1  
CTGAGTAAAGACCATTGTTAATGCTTGTATTGTTTGCAGATATTAAAGGGTGTAATTCTA  
>HPV54\_Alpha\_9628437\_nt5281\_Genome\_Tile\_rc|1  
TAGAAGAGGAAAAACCACCAGTGTGACGAAAAATCTGTGTCAGCATATACATCATATATAT  
>HPV54\_Alpha\_9628437\_nt5341\_Genome\_Tile\_rc|1  
CATACTGAGATGGTATAGATGTAGTTTGTAGGGCTGTTTGTACAGAACTATGTGAAACAG  
>HPV54\_Alpha\_9628437\_nt5381\_Genome\_Tile\_rc|1

GTATATGGCGATGAGGCAGTTAGGGGAACTGTGGTGTACCATACTGAGATGGTATAGAT  
>HPV54\_Alpha\_9628437\_nt5441\_Genome\_Tile\_rc|1  
GGACGTGCGGGAACAAATGGGGTGTGACCTGATGAGGGCCTAAAGGATGTGGGTATAGGT  
>HPV54\_Alpha\_9628437\_nt5501\_Genome\_Tile\_rc|1  
TAACTAGGATGCAGGTAAAAATCCCCACCATTAACAGCAATGGGTGTTTGTGGAAATATA  
>HPV54\_Alpha\_9628437\_nt6221\_Genome\_Tile\_rc|1  
AGGTAGCTACATCAAGGGGTACCTCACTTTTTGAGGTTTGTAGGGTTTTAAATCCATAG  
>HPV54\_Alpha\_9628437\_nt6241\_Genome\_Tile\_rc|1  
ATCAGGATATTTACAAATTGAGGTAGCTACATCAAGGGGTACCTCACTTTTTGAGGTTTG  
>HPV54\_Alpha\_9628437\_nt6421\_Genome\_Tile\_rc|1  
AGGAGTTGCAGCATAAATAGAACTGTCAAGGTTACCTGAGGATTTCTTAATGTATAAGTC  
>HPV54\_Alpha\_9628437\_nt6621\_Genome\_Tile\_rc|1  
TACTCCCTAAAGTCAGAATTATTAAAGCTATCCTGCGTGGATGCTGTAGCACACAATGTT  
>HPV54\_Alpha\_9628437\_nt6801\_Genome\_Tile\_rc|1  
GACTGTACAAACCTATATGTGTCTCCAACTACTTGTAGCTGGGGGGTTATACCAAAG  
>HPV54\_Alpha\_9628437\_nt6921\_Genome\_Tile\_rc|1  
AACTGGTCAAGGTCAGATGAAAATCGTTCCTTAAGGTCAACAGTCCAAAAATTAAATTTA  
>HPV54\_Alpha\_9628437\_nt7021\_Genome\_Tile\_rc|1  
CGCTGTACCCTTAGAGGAGGAAGGGGCTGCACGCTTTACAGGCCGAAGGCGCGGACGTGC  
>HPV54\_Alpha\_9628437\_nt7101\_Genome\_Tile\_rc|1  
ACACAGACAAGGTACAAACACAACAACACATAACAACACAACATACAACACTGTTACCTT  
>HPV54\_Alpha\_9628437\_nt7181\_Genome\_Tile\_rc|1  
CAACATATATAACATACGAGTCACAACATAAATAGGACACACAAACATTCCACACATAAC  
>HPV54\_Alpha\_9628437\_nt7201\_Genome\_Tile\_rc|1  
ATATAATACAGGAAAACATACAACATATATAACATACGAGTCACAACATAAATAGGACAC  
>HPV54\_Alpha\_9628437\_nt7281\_Genome\_Tile\_rc|1  
AAAAGGTAAAGGCTACTAAGCACGTAGCAAACAACATCACACAAAAGTTACTCATAGGGT  
>HPV54\_Alpha\_9628437\_nt7301\_Genome\_Tile\_rc|1  
CAAAATGGACACCAAAGGTGAAAAGGTAAAGGCTACTAAGCACGTAGCAAACAACATCAC  
>HPV54\_Alpha\_9628437\_nt7401\_Genome\_Tile\_rc|1  
GCGCCCAAAAGATTAGATGTACGATACAAAGTGCTTAAAACACAGTTTGTAGTCCAAACAG  
>HPV54\_Alpha\_9628437\_nt7421\_Genome\_Tile\_rc|1  
TACCAGGGCAGGATGTGGCGGCGCCCAAAAGATTAGATGTACGATACAAAGTGCTTAAAA  
>HPV54\_Alpha\_9628437\_nt7441\_Genome\_Tile\_rc|1  
TGCAGATGTGCTGGCAAACCTACCAGGGCAGGATGTGGCGGCGCCCAAAAGATTAGATGT  
>HPV54\_Alpha\_9628437\_nt7481\_Genome\_Tile\_rc|1  
GGAAAGTGAAGTTGTTCTGACAGTTATAAATGTGTGGGTGTGCAGATGTGCTGGCAAAC  
>HPV54\_Alpha\_9628437\_nt7521\_Genome\_Tile\_rc|1  
AAATCAATGTTGGAATGCAAAGGGCGTGTTTTACACAATGGAAAGTGAAGTTGTTCTGA  
>HPV54\_Alpha\_9628437\_nt7541\_Genome\_Tile\_rc|1  
TTATTATGTAAAAAATATATAAATCAATGTTGGAATGCAAAGGGCGTGTTTTACACAAT  
>HPV54\_Alpha\_9628437\_nt7601\_Genome\_Tile\_rc|1  
GTTTGCCAACTATGCACTTACTAAGTTTACACAGCTAAAATATGTGCCTACTAGCATGTT  
>HPV54\_Alpha\_9628437\_nt7661\_Genome\_Tile\_rc|1  
TCGGTTTCTCTGAATTAGTCACTGTTGTACAGACACGTACCTGGCATAACCTATGTTTTA  
>HPV53\_Alpha\_9627377\_nt0061\_Genome\_Tile\_rc|1  
CAAATAACTGACGATCCATGGATGTCCTGGGTGTTGTACACAGTGCCTTTATATGTACCG  
>HPV53\_Alpha\_9627377\_nt0121\_Genome\_Tile\_rc|1  
ATGGTTTATTACAACTTCACATAGCTGGTGCAATGTACGTGGTCGCTCTTCTGTATTTT  
>HPV53\_Alpha\_9627377\_nt0341\_Genome\_Tile\_rc|1  
AACTTTTTTTTAGTTAGTGCTTCCAGGCTAGCCCCGTACACTGAACAATTGTAATATCTT  
>HPV53\_Alpha\_9627377\_nt0561\_Genome\_Tile\_rc|1  
GTGGTATAAGTTCTATAATATATTGTGGAAGTGTGGTACGTTACCGTGCATGATTATAC  
>HPV53\_Alpha\_9627377\_nt0941\_Genome\_Tile\_rc|1  
CTGTTTCATCTTCAGATATTACATCCCCGTACGTTTTTTTTACTATTGCCTCCACGTGAA

>HPV53\_Alpha\_9627377\_nt0961\_Genome\_Tile\_rc|1  
AGATTCGGTGCTTTCCTCGTCTGTTTCATCTTCAGATATTACATCCCCGTACGTTTTTT  
>HPV53\_Alpha\_9627377\_nt0981\_Genome\_Tile\_rc|1  
TCTATAAACCCATCCAAATCAGATTCGGTGCTTTCCTCGTCTGTTTCATCTTCAGATATT  
>HPV53\_Alpha\_9627377\_nt1001\_Genome\_Tile\_rc|1  
TAGATATTATATTACTATTGTCTATAAACCCATCCAAATCAGATTCGGTGCTTTCCTCGT  
>HPV53\_Alpha\_9627377\_nt1381\_Genome\_Tile\_rc|1  
ATATCTTGTATTTGTTGCAGTGGCATTATATCCTGTCTATCCACATCCATATCACTTCCT  
>HPV53\_Alpha\_9627377\_nt1801\_Genome\_Tile\_rc|1  
TGGTGTACTCCCATACACGTCACTAATGTTGGATATAGATGTTTTATAAAAAGTATAATGC  
>HPV53\_Alpha\_9627377\_nt2101\_Genome\_Tile\_rc|1  
CCCACCATCATCCACCTTGCTACATACATGCTTTATCCATTGTTTCATATTCATCTGTTG  
>HPV53\_Alpha\_9627377\_nt3181\_Genome\_Tile\_rc|1  
TACGTTTTATGGCCGTCATGTATATAATATATGCCCTCATAGCTTACTGCAGAAGACACT  
>HPV53\_Alpha\_9627377\_nt3201\_Genome\_Tile\_rc|1  
CGTCTTTAAAGTTTGTATAATACGTTTTATGGCCGTCATGTATATAATATATGCCCTCAT  
>HPV53\_Alpha\_9627377\_nt3541\_Genome\_Tile\_rc|1  
CCACCAGGGAGGTGTTTTCTGGTGTGTTGTTGTGTTGTCTGTGTTCCCTTGCGACACAC  
>HPV53\_Alpha\_9627377\_nt3581\_Genome\_Tile\_rc|1  
CTTATAACCACTGTCGATTTTCGGTGTGTTACACGAAGCTCCACCAGGGAGGTGTTTTCT  
>HPV53\_Alpha\_9627377\_nt3601\_Genome\_Tile\_rc|1  
ATATGTACTACAGGTGCAGTCTTATAACCACTGTGATTTTCGGTGTGTTACACGAAGCT  
>HPV53\_Alpha\_9627377\_nt3701\_Genome\_Tile\_rc|1  
TACATTTGTCCAATGATAGGTGGATGATACAGTAACAAACAGTTGTTTATGTTTTTGAAA  
>HPV53\_Alpha\_9627377\_nt3721\_Genome\_Tile\_rc|1  
CTATTATTTACAGCACAGTTTACATTTGTCCAATGATAGGTGGATGATACAGTAACAAAC  
>HPV53\_Alpha\_9627377\_nt3741\_Genome\_Tile\_rc|1  
TATATAACAACAGTAATATAACTATTATTACAGCACAGTTTACATTTGTCCAATGATAGG  
>HPV53\_Alpha\_9627377\_nt3761\_Genome\_Tile\_rc|1  
TTGGCGTTGGGTTTCATCTTTATATACAACAGTAATATAACTATTATTACAGCACAGTT  
>HPV53\_Alpha\_9627377\_nt3841\_Genome\_Tile\_rc|1  
TAACATTACATATCAACACATGTCATATGTCCCAGTACCAGTGATACACTAGGGGGTATT  
>HPV53\_Alpha\_9627377\_nt3941\_Genome\_Tile\_rc|1  
TGGTTGCAAGTTTACAGGCCTAGCAGCATATATGGCGTGTGTAGTATTGTATATACCAGG  
>HPV53\_Alpha\_9627377\_nt4121\_Genome\_Tile\_rc|1  
AAAAAAGTATATATAGTGTAATGTGGTTATGTAGGATGATGCCACAACAAACAAAATA  
>HPV53\_Alpha\_9627377\_nt4141\_Genome\_Tile\_rc|1  
ACATAATAAAGGGAAGTAAAAAAGTATATATAGTGTAATGTGGTTATGTAGGATGA  
>HPV53\_Alpha\_9627377\_nt4161\_Genome\_Tile\_rc|1  
CACACAGCATGGCTATAGAAACATAATAAAGGGAAGTAAAAAAGTATATATAGTGTA  
>HPV53\_Alpha\_9627377\_nt4521\_Genome\_Tile\_rc|1  
CAGTGGGGCCTACCGATTCTACAACAATAGGGGGCCGAGCAGGGGTACATCAACAACAG  
>HPV53\_Alpha\_9627377\_nt4581\_Genome\_Tile\_rc|1  
GGAACGAAGCTCCAGACTCAATAACACTGGATTCTTCAACCAATGTAACAATTGAAGGGT  
>HPV53\_Alpha\_9627377\_nt4721\_Genome\_Tile\_rc|1  
AGGAGGGTCTACAAATGTGGGATTAGTATATGTAGTAGAACTAACATGTACAGAGGTAGA  
>HPV53\_Alpha\_9627377\_nt4741\_Genome\_Tile\_rc|1  
GTTTGGGGGACCTCAATAACAGGAGGGTCTACAAATGTGGGATTAGTATATGTAGTAGAA  
>HPV53\_Alpha\_9627377\_nt4941\_Genome\_Tile\_rc|1  
CAGGATCTGTGACCTTAACCTGTTGAAAGGCTTTTTTATATAAACGTGGGGCAGCTATAC  
>HPV53\_Alpha\_9627377\_nt4961\_Genome\_Tile\_rc|1  
TTCAGGTTTGTGAAGAAATGCAGGATCTGTGACCTTAACCTGTTGAAAGGCTTTTTTATA  
>HPV53\_Alpha\_9627377\_nt4981\_Genome\_Tile\_rc|1  
TTATCAACATTAATTAAAGTTTCAGGTTTGTGAAGAAATGCAGGATCTGTGACCTTAACC  
>HPV53\_Alpha\_9627377\_nt5001\_Genome\_Tile\_rc|1

CAGCATTTTGAATATGGGATTATCAACATTAATTAAAGTTTCAGGTTTGTGAAGAAATG  
>HPV53\_Alpha\_9627377\_nt5421\_Genome\_Tile\_rc|1  
TGGGAACATCCCAAGATGTACCAAAGGGTATTGTAACATTAGAGGTACTACCACTAAAAG  
>HPV53\_Alpha\_9627377\_nt5461\_Genome\_Tile\_rc|1  
GGGGGTCTGTGGGCAACACTACATCGGGACCTGAATAGATGGGAACATCCCAAGATGTA  
>HPV53\_Alpha\_9627377\_nt5501\_Genome\_Tile\_rc|1  
GGTGGTATCAAAAGGAGATTGAGGTGCATAAGGCCATGTAGGGGGTCTGTGGGCAACAC  
>HPV53\_Alpha\_9627377\_nt5781\_Genome\_Tile\_rc|1  
CTTAGGGATGTCTGCTTTACCAGATTTAGAAAATGGGGTAATAAGGATGTCCCACGGTAAG  
>HPV53\_Alpha\_9627377\_nt6161\_Genome\_Tile\_rc|1  
ATAAGTTCCAATGGGGGGCAGTCGCCCCGTGTAGTAGGTGTGGAACGACAGGCCGTACCC  
>HPV53\_Alpha\_9627377\_nt6441\_Genome\_Tile\_rc|1  
GTCCCTGCCATTACTACCCTTAATATATAAGTCATTAGGTATTTCTCACCATAACGCC  
>HPV53\_Alpha\_9627377\_nt6461\_Genome\_Tile\_rc|1  
TATACAGAGCTAGGGGGCGGGTCCCTGCCATTACTACCCTTAATATATAAGTCATTAGGT  
>HPV53\_Alpha\_9627377\_nt6821\_Genome\_Tile\_rc|1  
GTGGCAACAGGAGGCGACAAACCTATATTCCAGTCTTCCAGTAAGGTAGAATTCATAGTA  
>HPV53\_Alpha\_9627377\_nt7081\_Genome\_Tile\_rc|1  
GCTTGGAGGAGGGGGCTGAGGTAGATGTAGTAGAAGCAGAGCGTTTTTTAGAGGATACAG  
>HPV53\_Alpha\_9627377\_nt7101\_Genome\_Tile\_rc|1  
AACATACTATTTGCGTTTGCCTTGGAGGAGGGGGCTGAGGTAGATGTAGTAGAAGCAGA  
>HPV53\_Alpha\_9627377\_nt7141\_Genome\_Tile\_rc|1  
TAGTACATAATAACAACATACATACACAATACAGACACACAACATACTATTTGCGTTTGC  
>HPV53\_Alpha\_9627377\_nt7161\_Genome\_Tile\_rc|1  
CAGTATACACAATAAATAAATAGTACATAATACAACCATACATACACAATACAGACACAC  
>HPV53\_Alpha\_9627377\_nt7181\_Genome\_Tile\_rc|1  
AGACAACAAATACACACATACAGTATACACAATAAATAAATAGTACATAATACAACCAT  
>HPV53\_Alpha\_9627377\_nt7201\_Genome\_Tile\_rc|1  
TACATACAGTCATACAACACAGACAACAAATACACACATACAGTATACACAATAAATAAA  
>HPV53\_Alpha\_9627377\_nt7361\_Genome\_Tile\_rc|1  
TACATATATTAATAATACAGGTGGAGATTGGTATATAAACAGGGACGCCACCTAACATG  
>HPV53\_Alpha\_9627377\_nt7381\_Genome\_Tile\_rc|1  
AGGTAAGTGCATGATAACAGTACATATATTAATAATACAGGGTGGAGATTGGTATATAAA  
>HPV53\_Alpha\_9627377\_nt7401\_Genome\_Tile\_rc|1  
AGCTATACTATATGTGGTATAGGTAAGTGCATGATAACAGTACATATATTAATAATACAG  
>HPV53\_Alpha\_9627377\_nt7421\_Genome\_Tile\_rc|1  
AACTAAAATGGATACCTATAAGCTATACTATATGTGGTATAGGTAAGTGCATGATAACAG  
>HPV53\_Alpha\_9627377\_nt7441\_Genome\_Tile\_rc|1  
AGGGTACCAAAAAGGCGCCAACTAAAATGGATACCTATAAGCTATACTATATGTGGTAT  
>HPV53\_Alpha\_9627377\_nt7601\_Genome\_Tile\_rc|1  
CAGCCTACAGTAAGTGAATAAGGTAAGGCATAGTGTATAAAACAAAAAACATTAAAC  
>HPV26\_Alpha\_9627305\_nt0061\_Genome\_Tile\_rc|1  
TCGTTCTCTAGGATCCTCGAACATAGCTGTTTTGCACGTAGCTAGCCTTTTACTTTTATA  
>HPV26\_Alpha\_9627305\_nt0201\_Genome\_Tile\_rc|1  
CTATATACTACTCTTAGGTCACAAATTGCAAAATTATATACATCAGCCCATTGTAAGGTT  
>HPV26\_Alpha\_9627305\_nt0241\_Genome\_Tile\_rc|1  
TATTACACATCTTTTGCATGCAGCATACGGACTCCTATCTCTATATACTACTCTTAGGTC  
>HPV26\_Alpha\_9627305\_nt0261\_Genome\_Tile\_rc|1  
TCTGTTATTTTGAATAAAATATTACACATCTTTTGCATGCAGCATACGGACTCCTATCT  
>HPV26\_Alpha\_9627305\_nt0281\_Genome\_Tile\_rc|1  
AACATGTATAGCGTCTATACTCTGTTATTTTTGAATAAAATATTACACATCTTTTGCATG  
>HPV26\_Alpha\_9627305\_nt0541\_Genome\_Tile\_rc|1  
CAGATCTAGTATTACATCTTCAATATTAATTATGTTTCCATGCATTGTTCTTTACACTTG  
>HPV26\_Alpha\_9627305\_nt1161\_Genome\_Tile\_rc|1  
CTTGGTGTGATTCTGCTGACTGTGCTTTGCTGTCTGTGTTGATTGTGTTATGTCTTGCA



>HPV26\_Alpha\_9627305\_nt1181\_Genome\_Tile\_rc|1  
TTTGGCCTGTGAATTATTTACTTGGTGTGTATTCTGCTGACTGTCGCTTTGCTGTCTGTG  
>HPV26\_Alpha\_9627305\_nt1341\_Genome\_Tile\_rc|1  
CTACATCGATATCTTCCACTGAGGCATTTGACCCCCCTGACTACACACACTAGGCAACC  
>HPV26\_Alpha\_9627305\_nt1381\_Genome\_Tile\_rc|1  
AATAATTCACATATTTGTGTAACACTGTTTACATGTGTGTCTACATCGATATCTTCCACT  
>HPV26\_Alpha\_9627305\_nt2101\_Genome\_Tile\_rc|1  
GACCCGCCCCCTTCTATTTTAGAACATCTATATTGTAGCCATTGTGACATACACATAGAT  
>HPV26\_Alpha\_9627305\_nt2121\_Genome\_Tile\_rc|1  
ATTTGGCAATTTCCCTTCCACGACCCGCCCTCTTCTATTTTAGAACATCTATATTGTAGCC  
>HPV26\_Alpha\_9627305\_nt2141\_Genome\_Tile\_rc|1  
TACATGTTGAAACCTTAAAAATTTGGCAATTTCCCTTCCACGACCCGCCCTCTTCTATTTT  
>HPV26\_Alpha\_9627305\_nt2941\_Genome\_Tile\_rc|1  
TATTATAGTCCGTGTTTATTAACGACTGCAATGCTATATGTATTTCAATTGCCTGCCATG  
>HPV26\_Alpha\_9627305\_nt2961\_Genome\_Tile\_rc|1  
TCGCATTGTCCAAGCTTCTGTATTATAGTCCGTGTTTATTAACGACTGCAATGCTATATG  
>HPV26\_Alpha\_9627305\_nt3141\_Genome\_Tile\_rc|1  
TTTTGCATCAACATCTCCAGTACCTTTACACCACCCTATATCAGTTTTATAATACACATA  
>HPV26\_Alpha\_9627305\_nt3181\_Genome\_Tile\_rc|1  
CGTAATACTGCTTATATGCCCTTGTGTATAATATATCCCTTTTGCATCAACATCTCCAG  
>HPV26\_Alpha\_9627305\_nt3401\_Genome\_Tile\_rc|1  
CCTGGGTATGGCGCCTCGGTTTCTTGGTGCCACGGGCACGTAGGCTTCGGTGGTCTGG  
>HPV26\_Alpha\_9627305\_nt3541\_Genome\_Tile\_rc|1  
TTCCCGGGTGATGGCCTCCACTTGTACTGTGTAGGTTGTTGTTTGTATAGTCCACTGACT  
>HPV26\_Alpha\_9627305\_nt3741\_Genome\_Tile\_rc|1  
ATTATTACGTTGTGTTATACTGTTAAAGGTAATTGTTACAATGCCTTGTGATTGGTATC  
>HPV26\_Alpha\_9627305\_nt3841\_Genome\_Tile\_rc|1  
ACATATTGGCTTGTGTGTTGGTAAATATACACTATATTACAATGACATTATTCCCAATG  
>HPV26\_Alpha\_9627305\_nt4001\_Genome\_Tile\_rc|1  
AACCACAAAACAAAACACTAATAATAGCGAGGCTGCAAACACATAAATGGAAAGCAAAAGT  
>HPV26\_Alpha\_9627305\_nt4041\_Genome\_Tile\_rc|1  
ATACACAATATAGGTAGTTATATATGATGTAGATACCACAAACCAAAAACAAAACACTAA  
>HPV26\_Alpha\_9627305\_nt4061\_Genome\_Tile\_rc|1  
GGTATAAAAAATAAGCAAATATACACAATATAGGTAGTTATATATGATGTAGATACCACA  
>HPV26\_Alpha\_9627305\_nt4081\_Genome\_Tile\_rc|1  
AAAAATGTAAAAACAAGCAGGTATAAAAAATAAGCAAATATACACAATATAGGTAGTTA  
>HPV26\_Alpha\_9627305\_nt4101\_Genome\_Tile\_rc|1  
AGCAATTACCATTACAGTATAAAAAATGTAAAAACAAGCAGGTATAAAAAATAAGCAAAT  
>HPV26\_Alpha\_9627305\_nt4121\_Genome\_Tile\_rc|1  
GTTTATTAAAGGGACTAAGTAGCAATTACCATTACAGTATAAAAAATGTAAAAACAAGCA  
>HPV26\_Alpha\_9627305\_nt4141\_Genome\_Tile\_rc|1  
GACAGCTACCATTTGTAACACGTTTATTAAAGGGACTAAGTAGCAATTACCATTACAGTAT  
>HPV26\_Alpha\_9627305\_nt4641\_Genome\_Tile\_rc|1  
GGTATATCTATAGGGGGTTCAATATATAATGGATTTTGTATATTGGTACTTGTACATGT  
>HPV26\_Alpha\_9627305\_nt4681\_Genome\_Tile\_rc|1  
CGTTGTAGTAAATATATGACCTGATGCTTCCCCGGCCTGTGGTATATCTATAGGGGGTTC  
>HPV26\_Alpha\_9627305\_nt4701\_Genome\_Tile\_rc|1  
CTATGTGTGCCAGCTGTGGACGTTGTAGTAAATATATGACCTGATGCTTCCCCGGCCTGT  
>HPV26\_Alpha\_9627305\_nt4721\_Genome\_Tile\_rc|1  
CCATTGGAATTTCTTCATAACTATGTGTGCCAGCTGTGGACGTTGTAGTAAATATATGAC  
>HPV26\_Alpha\_9627305\_nt4841\_Genome\_Tile\_rc|1  
TAACCTTTACCTGTTGATAGGCCTTACTATACAAACGAGGAGCTGACACTCGTTGTATAC  
>HPV26\_Alpha\_9627305\_nt4941\_Genome\_Tile\_rc|1  
GTACTACTGGAAGCATATGTAAGTGTTCATCTATAGGTTTCATATGCAGGATTATCAAAG  
>HPV26\_Alpha\_9627305\_nt4961\_Genome\_Tile\_rc|1

AATCGGGGTCAGGTGCTACAGTACTACTGGAAGCATATGTAAGTGTTCATCTATAGGTT  
>HPV26\_Alpha\_9627305\_nt5161\_Genome\_Tile\_rc|1  
TGTATGTAAAGGCTGCAATTC AATTTCTTCGTGTT CAGCAAAAGACTGTATAGGACTAAT  
>HPV26\_Alpha\_9627305\_nt5181\_Genome\_Tile\_rc|1  
GGTGCAGATGAATGGGTAGATGTATGTAAAGGCTGCAATTC AATTTCTTCGTGTT CAGCA  
>HPV26\_Alpha\_9627305\_nt5201\_Genome\_Tile\_rc|1  
CTGCATATATATCAAACAAAGGTGCAGATGAATGGGTAGATGTATGTAAAGGCTGCAATT  
>HPV26\_Alpha\_9627305\_nt5221\_Genome\_Tile\_rc|1  
GCTAGGAAC TGTATCAGGGTCTGCATATATATCAAACAAAGGTGCAGATGAATGGGTAGA  
>HPV26\_Alpha\_9627305\_nt5261\_Genome\_Tile\_rc|1  
GTAATGTTGTAGGGGAATATGACATGCGCGGCGTATGTATGCTAGGAAC TGTATCAGGGT  
>HPV26\_Alpha\_9627305\_nt5281\_Genome\_Tile\_rc|1  
GGAGGCATATCTTGGAAC TGGTAATGTTGTAGGGGAATATGACATGCGCGGCGTATGTAT  
>HPV26\_Alpha\_9627305\_nt5301\_Genome\_Tile\_rc|1  
TTAATAGAGGAAAACACATTGGAGGCATATCTTGGAAC TGGTAATGTTGTAGGGGAATAT  
>HPV26\_Alpha\_9627305\_nt5321\_Genome\_Tile\_rc|1  
TAACATTGGTAGTGGAAGTATTAATAGAGGAAAACACATTGGAGGCATATCTTGGAAC TG  
>HPV26\_Alpha\_9627305\_nt5361\_Genome\_Tile\_rc|1  
CTATATACAGGTAGTTCAAATGAGGTGGATAAAGGCACAGTAACATTGGTAGTGGAAGTA  
>HPV26\_Alpha\_9627305\_nt5381\_Genome\_Tile\_rc|1  
GCGTGTAATGTCTGACCCACTATATACAGGTAGTTCAAATGAGGTGGATAAAGGCACAG  
>HPV26\_Alpha\_9627305\_nt5401\_Genome\_Tile\_rc|1  
CCATGTCGGGGAAGATGTGGGCGTGTAATGTCTGACCCACTATATACAGGTAGTTCAA  
>HPV26\_Alpha\_9627305\_nt5461\_Genome\_Tile\_rc|1  
ATTATCCCCATGCACAAC TATTGCAGGTAAAGTTAGTGGTGGGTGGGGGGGCAATGATGG  
>HPV26\_Alpha\_9627305\_nt5701\_Genome\_Tile\_rc|1  
TTTTGGCCAGTTTTAGGTATGGAAAAATATGGATGTCCTAATGTTAATAAACGAGAGCTG  
>HPV26\_Alpha\_9627305\_nt5941\_Genome\_Tile\_rc|1  
GCATTTACAGTAGCCAAATGAGAGTTTTCGGTATCATCCAAC TTATTAACAAAGGATGT  
>HPV26\_Alpha\_9627305\_nt5961\_Genome\_Tile\_rc|1  
TGTCCCTGTTGT CAGTGTCTGCATTTACAGTAGCCAAATGAGAGTTTTCGGTATCATCCA  
>HPV26\_Alpha\_9627305\_nt5981\_Genome\_Tile\_rc|1  
TTTATTATCAACTGAAACATTGTCCCTGTTGT CAGTGTCTGCATTTACAGTAGCCAAATG  
>HPV26\_Alpha\_9627305\_nt6061\_Genome\_Tile\_rc|1  
TGTGTATTTTTACATATAGTGCCAATACCCAGTGCTCTCCAAGGGCGGTGTACAACCT  
>HPV26\_Alpha\_9627305\_nt6101\_Genome\_Tile\_rc|1  
GGAAATTAATTC TAAGGGGGGCAATCCCCACGTTGTGTCTGTGTATTTTTACATATAGT  
>HPV26\_Alpha\_9627305\_nt6361\_Genome\_Tile\_rc|1  
CCTTTAATATACAAAGTGGTGGGTATAGCATCCCCAACAGCCCCCGCCTTATTATAAAAA  
>HPV26\_Alpha\_9627305\_nt6381\_Genome\_Tile\_rc|1  
GCTCCCTGCCTGATTCAGCACCTTTAATATACAAAGTGGTGGGTATAGCATCCCCAACAG  
>HPV26\_Alpha\_9627305\_nt6401\_Genome\_Tile\_rc|1  
ATAAATAGAAGATGTAGGGGGCTCCCTGCCTGATTCAGCACCTTTAATATACAAAGTGGT  
>HPV26\_Alpha\_9627305\_nt6721\_Genome\_Tile\_rc|1  
GAGGCATTCATTAAATGTATGTAAGCCATAACATCTGTTGTAAGTGT TATTTACACAAC  
>HPV26\_Alpha\_9627305\_nt6981\_Genome\_Tile\_rc|1  
GTTTGGTGCCTAGTTTCGGCCGCCGTTGTATGCCGGCCTGTAACATAAACTTACGCCCTA  
>HPV26\_Alpha\_9627305\_nt7001\_Genome\_Tile\_rc|1  
AGAGGTAGAAGATAAGGGACGTTTGGTGCCTAGTTTCGGCCGCCGTTGTATGCCGGCCTG  
>HPV26\_Alpha\_9627305\_nt7121\_Genome\_Tile\_rc|1  
CATTACATACAGTTGTACACACATACAAACACACCTTACATAACATACCACAAACATATA  
>HPV26\_Alpha\_9627305\_nt7201\_Genome\_Tile\_rc|1  
TTAAATAACAAGTATGCATACAAACAGGAAAACACATAACCATGCATACATATAATACAT  
>HPV26\_Alpha\_9627305\_nt7221\_Genome\_Tile\_rc|1  
GAAGACACATTCATACTTTATTAAATAACAAGTATGCATACAAACAGGAAAACACATAAC

>HPV26\_Alpha\_9627305\_nt7241\_Genome\_Tile\_rc|1  
AAAGACATGTAACCATGCATGAAGACACATTCATACTTTATTAAATAACAAGTATGCATA  
>HPV26\_Alpha\_9627305\_nt7261\_Genome\_Tile\_rc|1  
CAAATGACAAATAGTGTAGTAAAGACATGTAACCATGCATGAAGACACATTCATACTTTA  
>HPV26\_Alpha\_9627305\_nt7281\_Genome\_Tile\_rc|1  
CCATTACCTCAGGGGTAAAACAAATGACAAATAGTGTAGTAAAGACATGTAACCATGCAT  
>HPV26\_Alpha\_9627305\_nt7301\_Genome\_Tile\_rc|1  
GACACCACCTAAGGTTCTCTCCATTACCTCAGGGGTAAAACAAATGACAAATAGTGTAGT  
>HPV26\_Alpha\_9627305\_nt7321\_Genome\_Tile\_rc|1  
GTAATATAATAATTATAAGGGACACCACCTAAGGTTCTCTCCATTACCTCAGGGGTAAAA  
>HPV26\_Alpha\_9627305\_nt7361\_Genome\_Tile\_rc|1  
TACAAAAGTTTAGTGAAATACATATAAAAAGGTAAACTTGTGTAATATAATAATTATAAGG  
>HPV26\_Alpha\_9627305\_nt7381\_Genome\_Tile\_rc|1  
AAAAAGTAAAAATATAACACTACAAAAGTTTAGTGAAATACATATAAAAAGGTAAACTTGT  
>HPV26\_Alpha\_9627305\_nt7621\_Genome\_Tile\_rc|1  
CCTAACAGCAGTTTTATTATAATGTAAGAAAAAGTGCTTATGTAAGTATTGTTTAAATAT  
>HPV88\_Gamma\_167600365\_nt0001\_Genome\_Tile\_rc|1  
ATAATCTGCAGTACCACTGCCGTTATATATTTTCTGCAGAGGTGATTGTTGCCAACTAT  
>HPV88\_Gamma\_167600365\_nt0021\_Genome\_Tile\_rc|1  
GCATACTTCGGCAAAAAATAATAATCTGCAGTACCACTGCCGTTATATATTTTCTGCAG  
>HPV88\_Gamma\_167600365\_nt0041\_Genome\_Tile\_rc|1  
TAGATAAGAATCCTCCATCTGCATACTTCGGCAAAAAATAATAATCTGCAGTACCACTGC  
>HPV88\_Gamma\_167600365\_nt0061\_Genome\_Tile\_rc|1  
AAGTCATCTAGCCGTTTTGGTAGATAAGAATCCTCCATCTGCATACTTCGGCAAAAAATA  
>HPV88\_Gamma\_167600365\_nt0081\_Genome\_Tile\_rc|1  
AAATATTAAAAATCGAACAGAAGTCATCTAGCCGTTTTGGTAGATAAGAATCCTCCATCT  
>HPV88\_Gamma\_167600365\_nt0101\_Genome\_Tile\_rc|1  
AAGATGCACATCAAAAAGAGAAATATTA AAAATCGAACAGAAGTCATCTAGCCGTTTTGG  
>HPV88\_Gamma\_167600365\_nt0141\_Genome\_Tile\_rc|1  
ACTGCTGTAGGTCCAAAATATAGCCACAAAATATGCAAGGAAGATGCACATCAAAAAGAG  
>HPV88\_Gamma\_167600365\_nt0161\_Genome\_Tile\_rc|1  
TTTCTGATAGAACGAACCCAACTGCTGTAGGTCCAAAATATAGCCACAAAATATGCAAGG  
>HPV88\_Gamma\_167600365\_nt0181\_Genome\_Tile\_rc|1  
CTCCAGACCAAACCTAAGCTGTTTCTGATAGAACGAACCCAACTGCTGTAGGTCCAAAATA  
>HPV88\_Gamma\_167600365\_nt0201\_Genome\_Tile\_rc|1  
ACGCAAAACAAGCACCGCTCCTCCAGACCAAACCTAAGCTGTTTCTGATAGAACGAACCCA  
>HPV88\_Gamma\_167600365\_nt0221\_Genome\_Tile\_rc|1  
CCTAGAACAAGGGACACAACACGCAAAACAAGCACCGCTCCTCCAGACCAAACCTAAGCTG  
>HPV88\_Gamma\_167600365\_nt0241\_Genome\_Tile\_rc|1  
GCCTCATACCTAGCAGAAAGCCTAGAACAAAGGGACACAACACGCAAAACAAGCACCGCTC  
>HPV88\_Gamma\_167600365\_nt0281\_Genome\_Tile\_rc|1  
AAAATGAATTCCCTTTACAGAGCAGCGGTAAAAGCGTTCAGCCTCATACCTAGCAGAAAG  
>HPV88\_Gamma\_167600365\_nt0301\_Genome\_Tile\_rc|1  
TTCTTTCTTAGGAAATCCTCAAAATGAATTCCTTTTACAGAGCAGCGGTAAAAGCGTTCA  
>HPV88\_Gamma\_167600365\_nt0321\_Genome\_Tile\_rc|1  
GGCATAACCATCAGCTAGATTCTTTCTTAGGAAATCCTCAAAATGAATTCCTTTTACAG  
>HPV88\_Gamma\_167600365\_nt0341\_Genome\_Tile\_rc|1  
TGACATACATTCATAGATCGGCATACCACATCAGCTAGATTCTTTCTTAGGAAATCCTC  
>HPV88\_Gamma\_167600365\_nt0361\_Genome\_Tile\_rc|1  
TTTTCAGGTAAATCAAGCAATGACATACATTCATAGCATCGGCATACCACATCAGCTAGA  
>HPV88\_Gamma\_167600365\_nt0381\_Genome\_Tile\_rc|1  
CCCTAAAGATACAATCTAATTTTTTCAGGTAAATCAAGCAATGACATACATTCATAGCATC  
>HPV88\_Gamma\_167600365\_nt0401\_Genome\_Tile\_rc|1  
CACAAGATGGAAACACTACCCCTAAAGATACAATCTAATTTTTTCAGGTAAATCAAGCAA  
>HPV88\_Gamma\_167600365\_nt0421\_Genome\_Tile\_rc|1

GTTCCCCCTCCAAGTGTTTCTCACAAGATGGAAACACTCACCCCTAAAGATACAATCTAAT  
>HPV88\_Gamma\_167600365\_nt0441\_Genome\_Tile\_rc|1  
TTCTACAACAATTTCTGCACGTTCCCCCTCCAAGTGTTTCTCACAAGATGGAAACACTCAC  
>HPV88\_Gamma\_167600365\_nt0461\_Genome\_Tile\_rc|1  
AGGGCTCCTTCCCAATCATTTTCTACAACAATTTCTGCACGTTCCCCCTCCAAGTGTTTCT  
>HPV88\_Gamma\_167600365\_nt0481\_Genome\_Tile\_rc|1  
TATTTCTAGATCATTAATTGAGGGCTCCTTCCCAATCATTTTCTACAACAATTTCTGCAC  
>HPV88\_Gamma\_167600365\_nt0501\_Genome\_Tile\_rc|1  
AATACATGTTCTTCCAGCTTTATTTCTAGATCATTAATTGAGGGCTCCTTCCCAATCATTT  
>HPV88\_Gamma\_167600365\_nt0521\_Genome\_Tile\_rc|1  
TGCTTAAAGGTTAGCAGGCAATACATGTTCTTCCAGCTTTATTTCTAGATCATTAATTG  
>HPV88\_Gamma\_167600365\_nt0541\_Genome\_Tile\_rc|1  
ATCAGATGACAAAACCTCGTTTGCTTAAAGGTTAGCAGGCAATACATGTTCTTCCAGCTT  
>HPV88\_Gamma\_167600365\_nt0621\_Genome\_Tile\_rc|1  
ACCCTTACACCTGCTTCACAGAAGGCGCAACTGGTATCTATTTGGAAAGGTTCTCGCTCC  
>HPV88\_Gamma\_167600365\_nt0641\_Genome\_Tile\_rc|1  
CTGGTGAAGCTAGAACAAATACCCTTACACCTGCTTCACAGAAGGCGCAACTGGTATCTA  
>HPV88\_Gamma\_167600365\_nt0661\_Genome\_Tile\_rc|1  
CTGAAGCGTGCGAATTCGGCTGGTGAAGCTAGAACAATACCCTTACACCTGCTTCACA  
>HPV88\_Gamma\_167600365\_nt0701\_Genome\_Tile\_rc|1  
ACCCAGGGCAACTTATGGAAATCTCTGCAAGTAAAAGCTGCTGAAGCGTGCGAATTCGGG  
>HPV88\_Gamma\_167600365\_nt0721\_Genome\_Tile\_rc|1  
TCGAAAGTTGTTCTTGGAAACACCCAGGGCAACTTATGGAAATCTCTGCAAGTAAAAGCTG  
>HPV88\_Gamma\_167600365\_nt0761\_Genome\_Tile\_rc|1  
ATTATCAGTAGTATCAGTACCTTTATTGGGGTCTGCCATGTCGAAAGTTGTTCTTGGAAAC  
>HPV88\_Gamma\_167600365\_nt0821\_Genome\_Tile\_rc|1  
ATCTAAATCGTCTACACATTCTGCTTCATCTACAAGTAACCATTACAGATTACAGTCAAA  
>HPV88\_Gamma\_167600365\_nt0841\_Genome\_Tile\_rc|1  
TCTAACAAATTCATCAAGTACATCTAAATCGTCTACACATTCTGCTTCATCTACAAGTAAC  
>HPV88\_Gamma\_167600365\_nt0861\_Genome\_Tile\_rc|1  
TTGAACATTGCGTACTTTCTTCTAACAATTCATCAAGTACATCTAAATCGTCTACACATT  
>HPV88\_Gamma\_167600365\_nt0881\_Genome\_Tile\_rc|1  
ATCAATCAAGTTTGAAACCGTTGAACATTGCGTACTTTCTTCTAACAATTCATCAAGTAC  
>HPV88\_Gamma\_167600365\_nt0901\_Genome\_Tile\_rc|1  
TCAATATCAACTGGGTCATCATCAATCAAGTTTGAAACCGTTGAACATTGCGTACTTTCT  
>HPV88\_Gamma\_167600365\_nt0941\_Genome\_Tile\_rc|1  
TACCTGACTGTTGAATAAGGCCAGGGAATTTCCCTGATCCTCAATATCAACTGGGTCATC  
>HPV88\_Gamma\_167600365\_nt0981\_Genome\_Tile\_rc|1  
TTCGTTTTAGGGCGCTTATAGCTGTGTTACAATCCTCTGTTACCTGACTGTTGAATAAGG  
>HPV88\_Gamma\_167600365\_nt1041\_Genome\_Tile\_rc|1  
CTGCTTGAAGCCTTGGACTCAACTCAGCAACAGTCTGCAGCTGCGGACTTTTGATTAACT  
>HPV88\_Gamma\_167600365\_nt1141\_Genome\_Tile\_rc|1  
GAGTCCAACGCTACCTGAGAAGTATTTTGAGCTTCATCTTCTCCTATGCCACTGTCATCG  
>HPV88\_Gamma\_167600365\_nt1161\_Genome\_Tile\_rc|1  
TCTCTAAGGAGCTTTCTAAGGAGTCCAACGCTACCTGAGAAGTATTTTGAGCTTCATCTT  
>HPV88\_Gamma\_167600365\_nt1181\_Genome\_Tile\_rc|1  
AGTTAGCCCAGCTCCCGATGTCTCTAAGGAGCTTTCTAAGGAGTCCAACGCTACCTGAGA  
>HPV88\_Gamma\_167600365\_nt1221\_Genome\_Tile\_rc|1  
GGACGGTTGCCTGTGCTGCAATGTAAGGTTAATAGTTAGCCCAGCTCCCGATG  
>HPV88\_Gamma\_167600365\_nt1241\_Genome\_Tile\_rc|1  
GAGTTCTTTAAATTTTAGATGGACGGTTGCTGTCGGTTGCTGCAATGTAAAAGGTTAAT  
>HPV88\_Gamma\_167600365\_nt1261\_Genome\_Tile\_rc|1  
TCTTTAAATGATACACCATAGAGTTCTTTAAATTTTAGATGGACGGTTGCCCTGTCGGTTG  
>HPV88\_Gamma\_167600365\_nt1281\_Genome\_Tile\_rc|1  
TTTTAAAATTTCTAGTTAGTTCTTTAAATGATACACCATAGAGTTCTTTAAATTTTAGAT

>HPV88\_Gamma\_167600365\_nt1301\_Genome\_Tile\_rc|1  
ATTGGAACAAGACTTATCACTTTTAAATTTCTAGTTAGTTCTTTAAATGATACACCATA  
>HPV88\_Gamma\_167600365\_nt1341\_Genome\_Tile\_rc|1  
GAACTTCTTCTACAGCATTATACACAGCAATTACCCAGCTATTGGAACAAGACTTATCAC  
>HPV88\_Gamma\_167600365\_nt1381\_Genome\_Tile\_rc|1  
AACTCTACATGCTTCTGAAGCTGCACCTTTGATGCCTCCAGAACTTCTTCTACAGCATTA  
>HPV88\_Gamma\_167600365\_nt1401\_Genome\_Tile\_rc|1  
CATACACTATTAAGTGAAGAACTCTACATGCTTCTGAAGCTGCACCTTTGATGCCTCCA  
>HPV88\_Gamma\_167600365\_nt1421\_Genome\_Tile\_rc|1  
TAGATACAACCCATGAAATCCATACACTATTAAGTGAAGAACTCTACATGCTTCTGAAG  
>HPV88\_Gamma\_167600365\_nt1441\_Genome\_Tile\_rc|1  
TTAGTGCTTTTAAATACAATTAGATACAACCCATGAAATCCATACACTATTAAGTGAAG  
>HPV88\_Gamma\_167600365\_nt1461\_Genome\_Tile\_rc|1  
TAGATACAGTATCTCTATTTTTAGTGCTTTTAAATACAATTAGATACAACCCATGAAATC  
>HPV88\_Gamma\_167600365\_nt1481\_Genome\_Tile\_rc|1  
TAACATTTCCGTAAACAATTTAGATACAGTATCTCTATTTTTAGTGCTTTTAAATACAAT  
>HPV88\_Gamma\_167600365\_nt1501\_Genome\_Tile\_rc|1  
AATTGTAAAGCATTAACATTTAACATTTCCGTAAACAATTTAGATACAGTATCTCTATTT  
>HPV88\_Gamma\_167600365\_nt1581\_Genome\_Tile\_rc|1  
TAAAGAAGCATTTCCCAAACCTTTTCTATAAAAAAATAACGCTACCGGAACACTTCTTG  
>HPV88\_Gamma\_167600365\_nt1601\_Genome\_Tile\_rc|1  
ATCTGGAACCTCTCCATACATAAAAGAAGCATTTCCCAAACCTTTTCTATAAAAAAATAA  
>HPV88\_Gamma\_167600365\_nt1621\_Genome\_Tile\_rc|1  
AAGGTTTGTTTTTTAATCCAATCTGGAACCTCTCCATACATAAAAGAAGCATTTCCCAAA  
>HPV88\_Gamma\_167600365\_nt1661\_Genome\_Tile\_rc|1  
ATCAAATGTCTCTGCTGCTGACGCAGACTGATGCTCTACCAAGGTTTGTTTTTTAATCCA  
>HPV88\_Gamma\_167600365\_nt1681\_Genome\_Tile\_rc|1  
CATTGAACCATAGAGCTAAAATCAAATGTCTCTGCTGCTGACGCAGACTGATGCTCTACC  
>HPV88\_Gamma\_167600365\_nt1861\_Genome\_Tile\_rc|1  
GCCATTGACATTTGTCTCAATTCATACCTTCTATACATTTTTTACCATTGCGGCACAATCT  
>HPV88\_Gamma\_167600365\_nt1901\_Genome\_Tile\_rc|1  
ATTTTCGGTACATTTTGAACAACATTTATCTATCCATTTCAGCCATTGACATTTGTCTCAA  
>HPV88\_Gamma\_167600365\_nt1921\_Genome\_Tile\_rc|1  
GCAATTATTTTCCAGTTACCATTTTCGGTACATTTTGAACAACATTTATCTATCCATTCA  
>HPV88\_Gamma\_167600365\_nt1961\_Genome\_Tile\_rc|1  
AAATGATAAAAATTGTACATTCTGATGTTTCAGAAATGTAGCAATTATTTTCCAGTTACC  
>HPV88\_Gamma\_167600365\_nt1981\_Genome\_Tile\_rc|1  
AAAGGTTTCAATGCAATGAGAAATGATAAAAATTGTACATTCTGATGTTTCAGAAATGTA  
>HPV88\_Gamma\_167600365\_nt2021\_Genome\_Tile\_rc|1  
AACAAACACCAGACAATTCTTCTTTGGAACACCCTGTAAGAAAGGTTTCAATGCAATGAG  
>HPV88\_Gamma\_167600365\_nt2061\_Genome\_Tile\_rc|1  
ATGAGAAGCAGAAATATGATTTCCAGTGTCAGGGGGCCCAACAAACACCAGACAATTCT  
>HPV88\_Gamma\_167600365\_nt2101\_Genome\_Tile\_rc|1  
TTCATAAAGGACACAACCTTTCCCCCAAAAAACGTATTAATGAGAAGCAGAAATATGAT  
>HPV88\_Gamma\_167600365\_nt2141\_Genome\_Tile\_rc|1  
AGTATCTTGCAATGGTTGTAACCAGAAATGACTATTTCTATTTCATAAAGGACACAACCTT  
>HPV88\_Gamma\_167600365\_nt2241\_Genome\_Tile\_rc|1  
TTGCATCAAGAGATACAAGATTACCATCTAGTCCATTCCGAAGGTTAATATCCATATACA  
>HPV88\_Gamma\_167600365\_nt2321\_Genome\_Tile\_rc|1  
TAAGGATTGATCCTCCATTACATCCACGTTAGTGGTAACAAGTAAGGAGGTAATTTTCAT  
>HPV88\_Gamma\_167600365\_nt2341\_Genome\_Tile\_rc|1  
AGTCTACTATGCAGATATCTTAAGGATTGATCCTCCATTACATCCACGTTAGTGGTAACA  
>HPV88\_Gamma\_167600365\_nt2361\_Genome\_Tile\_rc|1  
TAGGGAATTTAAACATACTAGTCTACTATGCAGATATCTTAAGGATTGATCCTCCATTA  
>HPV88\_Gamma\_167600365\_nt2381\_Genome\_Tile\_rc|1

GTCATTTCAGTGGTAATTTGTTAGGGAATTTAAAACATACTAGTCTACTATGCAGATATCT  
>HPV88\_Gamma\_167600365\_nt2401\_Genome\_Tile\_rc|1  
TCATATACAAGGGAGCCATCGTCATTTCAGTGGTAATTTGTTAGGGAATTTAAAACATACT  
>HPV88\_Gamma\_167600365\_nt2421\_Genome\_Tile\_rc|1  
CCCATGTATCATTCGTTATTTTCATATACAAGGGAGCCATCGTCATTTCAGTGGTAATTTGT  
>HPV88\_Gamma\_167600365\_nt2441\_Genome\_Tile\_rc|1  
AAATTTTCTAAAAAACAGGCCCATGTATCATTCGTTATTTTCATATACAAGGGAGCCATC  
>HPV88\_Gamma\_167600365\_nt2461\_Genome\_Tile\_rc|1  
ACCAGGTTTAACTGGGTAGCAAATTTTCTAAAAAACAGGCCCATGTATCATTCGTTATT  
>HPV88\_Gamma\_167600365\_nt2561\_Genome\_Tile\_rc|1  
TCAGTTTCTCCCTTTCAATTAGATTCAATATGGCATCTTGCAGTGCAACGAAACGTTCT  
>HPV88\_Gamma\_167600365\_nt2581\_Genome\_Tile\_rc|1  
ATTGTATTTGGGATCTTAAATCAGTTTCTCCCTTTCAATTAGATTCAATATGGCATCTT  
>HPV88\_Gamma\_167600365\_nt2601\_Genome\_Tile\_rc|1  
TTTTCTAACCAGCTCCCAATATTGTATTTGGGATCTTAAATCAGTTTCTCCCTTTCAAT  
>HPV88\_Gamma\_167600365\_nt2641\_Genome\_Tile\_rc|1  
TATAGCCACTCTTTCCTAGCATAATAAAGGATCACCTGCTCTTTTCTAACCAGCTCCCAAT  
>HPV88\_Gamma\_167600365\_nt2681\_Genome\_Tile\_rc|1  
GAAACCGCTGGTGCTGGAGTAGGCTGCAGGCCAAGTCTATTATAGCCACTCTTCTAGCA  
>HPV88\_Gamma\_167600365\_nt2701\_Genome\_Tile\_rc|1  
CTTGTTTCTAGCATTGTATTCTGAAACCGCTGGTGCTGGAGTAGGCTGCAGGCCAAGTCTAT  
>HPV88\_Gamma\_167600365\_nt2741\_Genome\_Tile\_rc|1  
GATTTTTCTAAGGGATTTTAAACATAAGCTGGAGATGGATAGCTTGTTTCTAGCATTGTATTCT  
>HPV88\_Gamma\_167600365\_nt2761\_Genome\_Tile\_rc|1  
ATGGCTCTTTTGCAAATTTTGATTTTTCAAGGGATTTTAAACATAAGCTGGAGATGGATAG  
>HPV88\_Gamma\_167600365\_nt2781\_Genome\_Tile\_rc|1  
ACTTGCATCAGTTAATGACCATGGCTCTTTTGCAAATTTTGATTTTTCAAGGGATTTTAA  
>HPV88\_Gamma\_167600365\_nt2801\_Genome\_Tile\_rc|1  
GGAGTATTTACAAGCTCTGCACTTGCATCAGTTAATGACCATGGCTCTTTTGCAAATTTT  
>HPV88\_Gamma\_167600365\_nt2841\_Genome\_Tile\_rc|1  
AGTTACTGTAAATCCTCCTTTTTTGAAGCAGTCCCTAGGAGGAGTATTTACAAGCTCTGC  
>HPV88\_Gamma\_167600365\_nt2861\_Genome\_Tile\_rc|1  
CGATCATTATCAAAGTACACAGTTACTGTAAATCCTCCTTTTTTGAAGCAGTCCCTAGGA  
>HPV88\_Gamma\_167600365\_nt2881\_Genome\_Tile\_rc|1  
TGTAGGGAAAGCTGTTTTCTCGATCATTATCAAAGTACACAGTTACTGTAAATCCTCCTT  
>HPV88\_Gamma\_167600365\_nt2901\_Genome\_Tile\_rc|1  
ATAAATATGTTCCCATTTGTGTGTAGGGAAAGCTGTTTTCTCGATCATTATCAAAGTACAC  
>HPV88\_Gamma\_167600365\_nt2921\_Genome\_Tile\_rc|1  
TGCTCGTTCTGGTCCTGATAATAAATATGTTCCCATTTGTGTGTAGGGAAAGCTGTTTTCT  
>HPV88\_Gamma\_167600365\_nt2941\_Genome\_Tile\_rc|1  
CACCTGGCACTTTATGCCACTGCTCGTTCTGGTCCTGATAATAAATATGTTCCCATTTGTG  
>HPV88\_Gamma\_167600365\_nt2961\_Genome\_Tile\_rc|1  
CAGCCCATTTGTGATCAACACCACCTGGCACTTTATGCCACTGCTCGTTCTGGTCCTGATA  
>HPV88\_Gamma\_167600365\_nt2981\_Genome\_Tile\_rc|1  
GTATTTTCTTCATCATAGTACAGCCCATTTGTGATCAACACCACCTGGCACTTTATGCCAC  
>HPV88\_Gamma\_167600365\_nt3001\_Genome\_Tile\_rc|1  
GGAAATATACCCTTTTCATTGGTATTTTCTCATCATAGTACAGCCCATTTGTGATCAACAC  
>HPV88\_Gamma\_167600365\_nt3021\_Genome\_Tile\_rc|1  
AGACTCAGGCTCAAATAAAAGGAAATATACCCTTTTCATTGGTATTTTCTCATCATAGTA  
>HPV88\_Gamma\_167600365\_nt3041\_Genome\_Tile\_rc|1  
CCACTACTGCCATATTTTTGAGACTCAGGCTCAAATAAAAGGAAATATACCCTTTTCATTG  
>HPV88\_Gamma\_167600365\_nt3081\_Genome\_Tile\_rc|1  
GGCAGAAACAGTAGTATTTTTATAATGCACAGTCCATTGTCCACTACTGCCATATTTTTTG  
>HPV88\_Gamma\_167600365\_nt3121\_Genome\_Tile\_rc|1  
TGGAGATGGGTGAGGACCGCCTAGAAGAGCTGGTGGCAGAGGCAGAAACAGTAGTATTTT

>HPV88\_Gamma\_167600365\_nt3161\_Genome\_Tile\_rc|1  
GTGGTGTGTCGGGCGGTTGTGGCGTCGAAATCGGTTTTGGTGGAGATGGGTGAGGACCGC  
>HPV88\_Gamma\_167600365\_nt3181\_Genome\_Tile\_rc|1  
TTCTCTGCGGGCAGAGGTCGTGGTGTGTCGGGCGGTTGTGGCGTCGAAATCGGTTTTGG  
>HPV88\_Gamma\_167600365\_nt3201\_Genome\_Tile\_rc|1  
TTGTAGTCGCTTCCTTGGACTTCTCTGCGGGCAGAGGTCGTGGTGTGTCGGGCGGTTGT  
>HPV88\_Gamma\_167600365\_nt3221\_Genome\_Tile\_rc|1  
GTGGTTGAGCTGACCGCCTCTTGTAGTCGCTTCCTTGGACTTCTCTGCGGGCAGAGGTC  
>HPV88\_Gamma\_167600365\_nt3341\_Genome\_Tile\_rc|1  
GGGACAGATTCTCCGAGAGTGTTCGGTCGGTGGCTGTTCTTCTTCTTTGCTCCGGAG  
>HPV88\_Gamma\_167600365\_nt3521\_Genome\_Tile\_rc|1  
CTGCAAACTAAATTGGAGGAATATTTTTTTTCATTCTATTTCTCCAGCATTTAAGGGTA  
>HPV88\_Gamma\_167600365\_nt3541\_Genome\_Tile\_rc|1  
CTATCCATCTCCAGACTGAGCTGCAAACTAAATTGGAGGAATATTTTTTTTCATTCTAT  
>HPV88\_Gamma\_167600365\_nt3561\_Genome\_Tile\_rc|1  
GTTTTTCATGGGTGGTACTATCTATCCATCTCCAGACTGAGCTGCAAACTAAATTGGAGGA  
>HPV88\_Gamma\_167600365\_nt3581\_Genome\_Tile\_rc|1  
AATGCTACAAGCATGCGGCTGTTTTTCATGGGTGGTACTATCTATCCATCTCCAGACTGAG  
>HPV88\_Gamma\_167600365\_nt3601\_Genome\_Tile\_rc|1  
TTCTTTTCAGCAGTATTTTGAAATGCTACAAGCATGCGGCTGTTTTTCATGGGTGGTACTAT  
>HPV88\_Gamma\_167600365\_nt3641\_Genome\_Tile\_rc|1  
GTTGTACCCCTTGGCAAAGTCACTGAATTTAGAAATCGAGTTCTTTTCAGCAGTATTTTGA  
>HPV88\_Gamma\_167600365\_nt3661\_Genome\_Tile\_rc|1  
CAAGGTAACCAAATGCGTAGGTTGTACCCTTTGGCAAAGTCACTGAATTTAGAAATCGAG  
>HPV88\_Gamma\_167600365\_nt3681\_Genome\_Tile\_rc|1  
TATACATAGTTACAATGAATCAAGGTAACCAAATGCGTAGGTTGTACCCTTTGGCAAAGT  
>HPV88\_Gamma\_167600365\_nt3701\_Genome\_Tile\_rc|1  
GTCACGTTTACTTCTGGTTTTATACATAGTTACAATGAATCAAGGTAACCAAATGCGTAG  
>HPV88\_Gamma\_167600365\_nt3721\_Genome\_Tile\_rc|1  
CTATACAAATCTCAGCAGTGTACGTTTACTTCTGGTTTTATACATAGTTACAATGAAT  
>HPV88\_Gamma\_167600365\_nt3741\_Genome\_Tile\_rc|1  
TGCCAGTAGCTTTACAGTGTCTATACAAATCTCAGCAGTGTACGTTTACTTCTGGTTT  
>HPV88\_Gamma\_167600365\_nt3761\_Genome\_Tile\_rc|1  
TTCTACATCTGGAGGACAGTTGCCAGTAGCTTTACAGTGTCTATACAAATCTCAGCAGT  
>HPV88\_Gamma\_167600365\_nt3841\_Genome\_Tile\_rc|1  
AGACCCAGACCCCCCAGGTATATAACACTACCAAAAATGCGCAGCAATCGATCTGCTAAT  
>HPV88\_Gamma\_167600365\_nt3881\_Genome\_Tile\_rc|1  
TTCTATAGGTCTAATACCTGTTGTGCCCTCCCCTGTACCAAGACCCAGACCCCCCAGGTA  
>HPV88\_Gamma\_167600365\_nt3921\_Genome\_Tile\_rc|1  
TCTCTACGGTTATATCTGGGCGAACTGTTTCAACAGGAGCTTCTATAGGTCTAATACCTG  
>HPV88\_Gamma\_167600365\_nt3941\_Genome\_Tile\_rc|1  
TCTTGGTCTTACTGTGGTCTCTCTACGGTTATATCTGGGCGAACTGTTTCAACAGGAGC  
>HPV88\_Gamma\_167600365\_nt3961\_Genome\_Tile\_rc|1  
AAAGTGGTAGGTCTTTGTGGTCTTGGTCTTACTGTGGGTCTCTCTACGGTTATATCTGGG  
>HPV88\_Gamma\_167600365\_nt3981\_Genome\_Tile\_rc|1  
TTCTATCTATAGGTGTACCGAAAGTGGTAGGTCTTTGTGGTCTTGGTCTTACTGTGGGTC  
>HPV88\_Gamma\_167600365\_nt4001\_Genome\_Tile\_rc|1  
AGTGATATCAGCAGATCCAATTCTATCTATAGGTGTACCGAAAGTGGTAGGTCTTTGTGG  
>HPV88\_Gamma\_167600365\_nt4021\_Genome\_Tile\_rc|1  
GTGGGCTTAACTACATTAGGAGTGATATCAGCAGATCCAATTCTATCTATAGGTGTACCG  
>HPV88\_Gamma\_167600365\_nt4041\_Genome\_Tile\_rc|1  
GGGGCACGATAGAGGATTCTGTGGGCTTAACTACATTAGGAGTGATATCAGCAGATCCAA  
>HPV88\_Gamma\_167600365\_nt4061\_Genome\_Tile\_rc|1  
TGGAATCCCACTTTCATTTAGGGGCACGATAGAGGATTCTGTGGGCTTAACTACATTAGG  
>HPV88\_Gamma\_167600365\_nt4081\_Genome\_Tile\_rc|1

GAATCTATAATTGTAGGGTCTGGAATCCCACTTTCATTTAGGGGCACGATAGAGGATTCT  
>HPV88\_Gamma\_167600365\_nt4101\_Genome\_Tile\_rc|1  
CCTCACCACCCCCTGTTGCAGAATCTATAATTGTAGGGTCTGGAATCCCACTTTCATTTA  
>HPV88\_Gamma\_167600365\_nt4121\_Genome\_Tile\_rc|1  
TATGTCATATTCTCCTAGACCCTCACCACCCCCCTGTTGCAGAATCTATAATTGTAGGGTC  
>HPV88\_Gamma\_167600365\_nt4161\_Genome\_Tile\_rc|1  
CTGTAGCTCCGAGGGTCTCATTTGGATCTACAGTGGTCAATATGTCATATTCTCCTAGAC  
>HPV88\_Gamma\_167600365\_nt4181\_Genome\_Tile\_rc|1  
AGAAGTGGTAGGATGCCCCCTGTAGCTCCGAGGGTCTCATTTGGATCTACAGTGGTCAA  
>HPV88\_Gamma\_167600365\_nt4221\_Genome\_Tile\_rc|1  
GACTGATGTCTAAGATTGCTGTTTCATTATTAAGTGTACCAGAAGTGGTAGGATGCCCCC  
>HPV88\_Gamma\_167600365\_nt4241\_Genome\_Tile\_rc|1  
TTTTGGAGGAGGTTTCATAGGGACTGATGTCTAAGATTGCTGTTTCATTATTAAGTGTACC  
>HPV88\_Gamma\_167600365\_nt4261\_Genome\_Tile\_rc|1  
CTTGGGGCAAGTGCAAAACGTTTGGAGGAGGTTTCATAGGGACTGATGTCTAAGATTGCT  
>HPV88\_Gamma\_167600365\_nt4361\_Genome\_Tile\_rc|1  
AACAATTTACCTGTAATATTAGCATCTACAAACACATTTATGTTTGATTCTGTAGGTAG  
>HPV88\_Gamma\_167600365\_nt4381\_Genome\_Tile\_rc|1  
TCTAATGGGATTTCTTCACCAACAATTTACCTGTAATATTAGCATCTACAAACACATTT  
>HPV88\_Gamma\_167600365\_nt4401\_Genome\_Tile\_rc|1  
CTTCTATAGAATTTATAGGCTCTAATGGGATTTCTTCACCAACAATTTACCTGTAATAT  
>HPV88\_Gamma\_167600365\_nt4421\_Genome\_Tile\_rc|1  
CCCAGCCTCTATTTCTGAATTCTTCTATAGAATTTATAGGCTCTAATGGGATTTCTTCACC  
>HPV88\_Gamma\_167600365\_nt4441\_Genome\_Tile\_rc|1  
CTAGGAGTACTAGTCTGGCGCCAGCCTCTATTTCTGAATTCTTCTATAGAATTTATAGGC  
>HPV88\_Gamma\_167600365\_nt4461\_Genome\_Tile\_rc|1  
GAAATCTTTCAACAGCTTCCCTAGGAGTACTAGTCTGGCGCCAGCCTCTATTTCTGAATT  
>HPV88\_Gamma\_167600365\_nt4481\_Genome\_Tile\_rc|1  
TAAGCTTCTGGCCCGCCCAAGAAATCTTTCAACAGCTTCCCTAGGAGTACTAGTCTGGCG  
>HPV88\_Gamma\_167600365\_nt4521\_Genome\_Tile\_rc|1  
CAACATTGTCTGTTCTGATTTGTTGAATGTAACGATTATATAAGCTTCTGGCCCGCCCAA  
>HPV88\_Gamma\_167600365\_nt4561\_Genome\_Tile\_rc|1  
AATTCAAATTGAACCGCGCTGAAGGCCGGGTTAAAAAGTCAACATTGTCTGTTCTGATT  
>HPV88\_Gamma\_167600365\_nt4621\_Genome\_Tile\_rc|1  
ATTTTCAGCAACATCCCGCGCAAATTCAAGACTTACATCACCAGTAAAGGCGGGATTTTCA  
>HPV88\_Gamma\_167600365\_nt4641\_Genome\_Tile\_rc|1  
CTGGATCAGGAGCCGCTGTTATTTTCAGCAACATCCCGCGCAAATTCAAGACTTACATCAC  
>HPV88\_Gamma\_167600365\_nt4761\_Genome\_Tile\_rc|1  
CTATTATGGTACCGCTTCTGGTACTAATCGCTCCTTTTGTTCCTAATCTGCTGACTCGCA  
>HPV88\_Gamma\_167600365\_nt4781\_Genome\_Tile\_rc|1  
GTAGTAGTGACACGAGGACCTATTATGGTACCGCTTCTGGTACTAATCGCTCCTTTTGT  
>HPV88\_Gamma\_167600365\_nt4801\_Genome\_Tile\_rc|1  
TCAATTGCACTAAGATCAAAGTAGTAGTGACACGAGGACCTATTATGGTACCGCTTCTG  
>HPV88\_Gamma\_167600365\_nt4821\_Genome\_Tile\_rc|1  
TAACATCAGGCTCTATAGGTTCAATTGCACTAAGATCAAAGTAGTAGTGACACGAGGAC  
>HPV88\_Gamma\_167600365\_nt4841\_Genome\_Tile\_rc|1  
CCCTAAATTAGAAAGCTCAATAACATCAGGCTCTATAGGTTCAATTGCACTAAGATCAAA  
>HPV88\_Gamma\_167600365\_nt4861\_Genome\_Tile\_rc|1  
GTACTTTCCCCACTAAACTCCCCTAAATTAGAAAGCTCAATAACATCAGGCTCTATAGGT  
>HPV88\_Gamma\_167600365\_nt4881\_Genome\_Tile\_rc|1  
ATAAAATTGAATCTACAATTGTACTTTCCCCACTAAACTCCCCTAAATTAGAAAGCTCAA  
>HPV88\_Gamma\_167600365\_nt4921\_Genome\_Tile\_rc|1  
GTTGACTCAAAAGGTGCTATAGGATCTACTGTATGCCAGATAAAATTGAATCTACAATT  
>HPV88\_Gamma\_167600365\_nt4941\_Genome\_Tile\_rc|1  
CTAGATCTGCAATAGAAAATGTTGACTCAAAAGGTGCTATAGGATCTACTGTATGCCAG



>HPV88\_Gamma\_167600365\_nt4961\_Genome\_Tile\_rc|1  
GTCCTCTAGTAAAGGGTCTTCTAGATCTGCAATAGAAAATGTTGACTCAAAAGGTGCTAT  
>HPV88\_Gamma\_167600365\_nt4981\_Genome\_Tile\_rc|1  
AATAAGTGA CTATTACTAAAGTCTCTAGTAAAGGGTCTTCTAGATCTGCAATAGAAAAT  
>HPV88\_Gamma\_167600365\_nt5001\_Genome\_Tile\_rc|1  
CCTCTTCCTCAAAATGCACAAATAAGTGACTATTACTAAAGTCTCTAGTAAAGGGTCTT  
>HPV88\_Gamma\_167600365\_nt5021\_Genome\_Tile\_rc|1  
AGGAACAGATATAAGTTCATCTCTTCTCAAAATGCACAAATAAGTGACTATTACTAAA  
>HPV88\_Gamma\_167600365\_nt5061\_Genome\_Tile\_rc|1  
CATCTACAAAAGCTTTTATTGCTGCGCCAGGAGGAAGAGTAGGAACAGATATAAGTTCAT  
>HPV88\_Gamma\_167600365\_nt5101\_Genome\_Tile\_rc|1  
TTTACCATTTCAGGATATGAAACTATAATATCTGCATAATCATCTACAAAAGCTTTTATT  
>HPV88\_Gamma\_167600365\_nt5121\_Genome\_Tile\_rc|1  
GGATTTCAATTTTGTTTACATTTACCATTTCAGGATATGAAACTATAATATCTGCATAAT  
>HPV88\_Gamma\_167600365\_nt5141\_Genome\_Tile\_rc|1  
GGGCACTAATGTAGTTGCAGGGATTTCAATTTTGTTTACATTTACCATTTCAGGATATGA  
>HPV88\_Gamma\_167600365\_nt5161\_Genome\_Tile\_rc|1  
AGTCTAATGTCTGGTTCAGAGGGCACTAATGTAGTTGCAGGGATTTCAATTTTGTTTACA  
>HPV88\_Gamma\_167600365\_nt5181\_Genome\_Tile\_rc|1  
AATCTGGAGAAAACCAATCTAGTCTAATGTCTGGTTCAGAGGGCACTAATGTAGTTGCAG  
>HPV88\_Gamma\_167600365\_nt5201\_Genome\_Tile\_rc|1  
TAAAGAAGGGTGCAAATCATAATCTGGAGAAAACCAATCTAGTCTAATGTCTGGTTCAGA  
>HPV88\_Gamma\_167600365\_nt5281\_Genome\_Tile\_rc|1  
GCTTCCCAGTTTGTGTGTTGCCATAATGCCATCTGCAAAACATCAAAACATATTGCGTTTG  
>HPV88\_Gamma\_167600365\_nt5321\_Genome\_Tile\_rc|1  
GATAATATTTTTTGCCACAGGTTTAGCCGGCGGAAGGAACAGCTTCCCAGTTTGTGTGTTGC  
>HPV88\_Gamma\_167600365\_nt5341\_Genome\_Tile\_rc|1  
CAATAACATAATCATCTGTAGATAATATTTTTGCCACAGGTTTAGCCGGCGGAAGGAACA  
>HPV88\_Gamma\_167600365\_nt5361\_Genome\_Tile\_rc|1  
ATGAAAATGTAACGTAGTTCCAATAACATAATCATCTGTAGATAATATTTTTGCCACAGG  
>HPV88\_Gamma\_167600365\_nt5381\_Genome\_Tile\_rc|1  
AACAGACGATCAGTGCCAGCATGAAAATGTAACGTAGTTCCAATAACATAATCATCTGTA  
>HPV88\_Gamma\_167600365\_nt5421\_Genome\_Tile\_rc|1  
TCCATCATTCCTAATTTTCATAGTAGGGATGGTCTACTGTTAACAGACGATCAGTGCCAGC  
>HPV88\_Gamma\_167600365\_nt5441\_Genome\_Tile\_rc|1  
ATCTCAATTTTGTGTTGGGATCTCCATCATTCCTAATTTTCATAGTAGGGATGGTCTACTGTT  
>HPV88\_Gamma\_167600365\_nt5461\_Genome\_Tile\_rc|1  
GGCATGCAGACACCTTAGGAATCTCAATTTTGTGTTGGGATCTCCATCATTCCTAATTTTCAT  
>HPV88\_Gamma\_167600365\_nt5521\_Genome\_Tile\_rc|1  
ACTGATCTATTAAGGCAAATTTATTTGGATCAGGCAATTTTCAGCCTAAACACTCGATATT  
>HPV88\_Gamma\_167600365\_nt5541\_Genome\_Tile\_rc|1  
ACGTTTCAGGATTGAAAATTGACTGATCTATTAAGGCAAATTTATTTGGATCAGGCAATTT  
>HPV88\_Gamma\_167600365\_nt5561\_Genome\_Tile\_rc|1  
AATTTCCAACTAAACGTTTCAGTTTCAGGATTGAAAATTGACTGATCTATTAAGGCAAAT  
>HPV88\_Gamma\_167600365\_nt5581\_Genome\_Tile\_rc|1  
TACCAATTTGAATACCTTTTAATTTCCAACTAAACGTTTCAGTTTCAGGATTGAAAATTG  
>HPV88\_Gamma\_167600365\_nt5601\_Genome\_Tile\_rc|1  
TACATTTAGTGGTCCACCTCTACCAATTTGAATACCTTTTAATTTCCAACTAAACGTTTC  
>HPV88\_Gamma\_167600365\_nt5621\_Genome\_Tile\_rc|1  
AAAGGATGACCTGCAGTACCTACATTTAGTGGTCCACCTCTACCAATTTGAATACCTTTT  
>HPV88\_Gamma\_167600365\_nt5681\_Genome\_Tile\_rc|1  
TCATCTGTTTGGAGCTGGTGGATAATCATTAGGATTTTCAGTATCTGGAGCTTTGTTAAAT  
>HPV88\_Gamma\_167600365\_nt5741\_Genome\_Tile\_rc|1  
ATGCAACCAATTATAAATAATTGGGTATGTTTGGGGTCCATAGACACGTTACGTCTGTCT  
>HPV88\_Gamma\_167600365\_nt5761\_Genome\_Tile\_rc|1

AATATTACCATCTGCAGGAATGCAACCAATTATAAATAATTGGGTATGTTTGGGGTCCA  
>HPV88\_Gamma\_167600365\_nt5821\_Genome\_Tile\_rc|1  
GTATAGGTGGACAGTCTCCTGCATTGCGCTGATCTCCAACACATGGTTTAGCAACATCCC  
>HPV88\_Gamma\_167600365\_nt5841\_Genome\_Tile\_rc|1  
AATAACAGCATTAACATACTGTATAGGTGGACAGTCTCCTGCATTGCGCTGATCTCCAAC  
>HPV88\_Gamma\_167600365\_nt5861\_Genome\_Tile\_rc|1  
TCACCCATTGTTCCGTCCTGAATAACAGCATTAACATACTGTATAGGTGGACAGTCTCCT  
>HPV88\_Gamma\_167600365\_nt5901\_Genome\_Tile\_rc|1  
TTGCAAAAAGTTCTTAAAATTTGCTGCCCCAAAACCTGTGTCACCCATTGTTCCGTCCTG  
>HPV88\_Gamma\_167600365\_nt5941\_Genome\_Tile\_rc|1  
ATATATCATTAATAATATCCAGAGGAACACCTGCTTTGTCTTGCAAAAAGTTCTTAAAAT  
>HPV88\_Gamma\_167600365\_nt6041\_Genome\_Tile\_rc|1  
GCCATAAAATGGCGAGCATACGACTGCTCACGTTTTCCAAAAAAGAAACATTTATCGCCA  
>HPV88\_Gamma\_167600365\_nt6081\_Genome\_Tile\_rc|1  
ATTTCCCTCTGGTATGGCATCTCCATTTTACCTTCACGAGCCATAAAATGGCGAGCATA  
>HPV88\_Gamma\_167600365\_nt6121\_Genome\_Tile\_rc|1  
TTTTAAAATTCACAGCATTTGTAGGTGGCAATAAGTATTTATTTCCCTCTGGTATGGCAT  
>HPV88\_Gamma\_167600365\_nt6141\_Genome\_Tile\_rc|1  
GAAATAAACATGAGATCCCATTTTAAAATTCACAGCATTTGTAGGTGGCAATAAGTATTT  
>HPV88\_Gamma\_167600365\_nt6161\_Genome\_Tile\_rc|1  
AGTGATCCACTAGCAGTAGGGAAATAAACATGAGATCCCATTTTAAAATTCACAGCATTT  
>HPV88\_Gamma\_167600365\_nt6181\_Genome\_Tile\_rc|1  
AGTTAGAATCACTAGTAGTAAGTGATCCACTAGCAGTAGGGAAATAAACATGAGATCCCA  
>HPV88\_Gamma\_167600365\_nt6201\_Genome\_Tile\_rc|1  
CCAATAAGGTCTGTTAAATAAGTTAGAATCACTAGTAGTAAGTGATCCACTAGCAGTAGG  
>HPV88\_Gamma\_167600365\_nt6341\_Genome\_Tile\_rc|1  
TAAGTATACTGATTTCCAATAGCTCCTCCCTGATTATAAATGGAAAGAGTAAAATTAGTA  
>HPV88\_Gamma\_167600365\_nt6361\_Genome\_Tile\_rc|1  
GAGTAAAATCTTGAGATTTATAAGTATACTGATTTCCAATAGCTCCTCCCTGATTATAAA  
>HPV88\_Gamma\_167600365\_nt6381\_Genome\_Tile\_rc|1  
CTCTGCATGTCGAGTATACTGAGTAAAATCTTGAGATTTATAAGTATACTGATTTCCAAT  
>HPV88\_Gamma\_167600365\_nt6401\_Genome\_Tile\_rc|1  
ATAGCTTCCAATTCGTATTCCTCTGCATGTCGAGTATACTGAGTAAAATCTTGAGATTTA  
>HPV88\_Gamma\_167600365\_nt6421\_Genome\_Tile\_rc|1  
GAACTCTACAAAGCTGGAATATAGCTTCCAATTCGTATTCCTCTGCATGTCGAGTATACT  
>HPV88\_Gamma\_167600365\_nt6481\_Genome\_Tile\_rc|1  
ATTCATCTAATATATTAGGATTCATAACATTTAAGTGAGCTAAAATATCAGGCTCCAAAG  
>HPV88\_Gamma\_167600365\_nt6581\_Genome\_Tile\_rc|1  
GGAGCAGGATTTTCAGTAGGACATCTTGTTGCCAAAGATGTTATATATCTATAATTGTCC  
>HPV88\_Gamma\_167600365\_nt6601\_Genome\_Tile\_rc|1  
TATAAGGGTCAGGTATTTCTGGAGCAGGATTTTCAGTAGGACATCTTGTTGCCAAAGATG  
>HPV88\_Gamma\_167600365\_nt6621\_Genome\_Tile\_rc|1  
TAACCAAAAAATTATAATCTTTATAAGGGTCAGGTATTTCTGGAGCAGGATTTTCAGTAGG  
>HPV88\_Gamma\_167600365\_nt6641\_Genome\_Tile\_rc|1  
AACTTCTCTTGCAAATCACTAACCAAAAAATTATAATCTTTATAAGGGTCAGGTATTTCT  
>HPV88\_Gamma\_167600365\_nt6661\_Genome\_Tile\_rc|1  
ATTGGTCAAGTTCAGTGGAGAACTTCTCTTGCAAATCACTAACCAAAAAATTATAATCTT  
>HPV88\_Gamma\_167600365\_nt6681\_Genome\_Tile\_rc|1  
AAATTTGCGACCTAAGCTAAATTGGTCAAGTTCAGTGGAGAACTTCTCTTGCAAATCAAC  
>HPV88\_Gamma\_167600365\_nt6761\_Genome\_Tile\_rc|1  
ACTGTTCTGGAAGTATTTCTAACAGAACTATTGGCAACTGTCCTGACACGTTTTGTGGGC  
>HPV88\_Gamma\_167600365\_nt6801\_Genome\_Tile\_rc|1  
ATTATCTTAAATATGCAATTATCGTGTTCTGTTTTCTTTTTACTGTTCTGGAAGTATTTCT  
>HPV88\_Gamma\_167600365\_nt6821\_Genome\_Tile\_rc|1  
TTTATGGGCTTCAGGATGTAATTATCTTAAATATGCAATTATCGTGTTCTGTTTTCTTTTT

>HPV88\_Gamma\_167600365\_nt6841\_Genome\_Tile\_rc|1  
CACAGCAATTATTTTCACAGTTTTATGGGCTTCAGGATGTAATTATCTTAAATATGCAATT  
>HPV88\_Gamma\_167600365\_nt6861\_Genome\_Tile\_rc|1  
TACCAAGTTGATCCAAGAGTCACAGCAATTATTTTCACAGTTTTATGGGCTTCAGGATGTA  
>HPV88\_Gamma\_167600365\_nt6881\_Genome\_Tile\_rc|1  
AGTATTATCAGGCAAGTTGGTACCAAGTTGATCCAAGAGTCACAGCAATTATTTTCACAGT  
>HPV88\_Gamma\_167600365\_nt6901\_Genome\_Tile\_rc|1  
TTAATCAATACATTCCCTTCAAGTATTATCAGGCAAGTTGGTACCAAGTTGATCCAAGAGT  
>HPV88\_Gamma\_167600365\_nt6921\_Genome\_Tile\_rc|1  
ATGGTATAGCAGCAATTTATTTAATCAATACATTCCCTCAAGTATTATCAGGCAAGTTGG  
>HPV88\_Gamma\_167600365\_nt6941\_Genome\_Tile\_rc|1  
ACGACCCCATGACTCAACTGATGGTATAGCAGCAATTTATTTAATCAATACATTCCCTTCA  
>HPV88\_Gamma\_167600365\_nt6981\_Genome\_Tile\_rc|1  
ACACTTATAAGGTCGAGTGGACGGGTGGAGACCATAAATGACGACCCCATGACTCAACTG  
>HPV88\_Gamma\_167600365\_nt7001\_Genome\_Tile\_rc|1  
ACCTGTCCAGCCTGCTGACCACACTTATAAGGTCGAGTGGACGGGTGGAGACCATAAATG  
>HPV88\_Gamma\_167600365\_nt7021\_Genome\_Tile\_rc|1  
TTACTTCGCTGGACAATACTACCTGTCCAGCCTGCTGACCACACTTATAAGGTCGAGTGG  
>HPV88\_Gamma\_167600365\_nt7081\_Genome\_Tile\_rc|1  
CTTCCGTTTCGAGAGACGGCTATGTTCCAACAACCTTACCTTTAATGGTTTGACAGCTGGA  
>HPV88\_Gamma\_167600365\_nt7121\_Genome\_Tile\_rc|1  
AGACGGTTATTATAAAGGCCTTTAGGGCACATTTTGTACCGCTTCCGTTTCGAGAGACGGCT  
>HPV88\_Gamma\_167600365\_nt7141\_Genome\_Tile\_rc|1  
AAAAGGCGCCAAAATACCAGAGACGGTTATTATAAAGGCCTTTAGGGCACATTTTGTACCG  
>HPV88\_Gamma\_167600365\_nt7161\_Genome\_Tile\_rc|1  
AACTTGCAGTCACGCGAAAAAAGGCGCCAAAATACCAGAGACGGTTATTATAAAGGCCT  
>HPV88\_Gamma\_167600365\_nt7201\_Genome\_Tile\_rc|1  
CATATTCTGCCATGTGTCTGACTCAATACATGAGTGTCTGAACTTGCAGTCACGCGAAAA  
>HPV88\_Gamma\_167600365\_nt7221\_Genome\_Tile\_rc|1  
CATAGGCAGGCAGCCAAAACATATTCTGCCATGTGTCTGACTCAATACATGAGTGTCTG  
>HPV88\_Gamma\_167600365\_nt7261\_Genome\_Tile\_rc|1  
TAATGTCTGTGAACACCACTCCCGGTACCACTCCCGGTACATAGGCAGGCAGCCAAAAA  
>HPV58\_Alpha\_222386\_nt0081\_Genome\_Tile\_rc|1  
TCCGTGGTTTCTCCTCTGCGTCCTGGAACATAGTCCTGCAGTAGCCTACCAAAAAATGTC  
>HPV58\_Alpha\_222386\_nt0141\_Genome\_Tile\_rc|1  
CGCATTTCAATTTCGATTTTCATGCACAGATGTCTCCAACGCCTGACACAAATCATGCAATG  
>HPV58\_Alpha\_222386\_nt0261\_Genome\_Tile\_rc|1  
ATAGCAATCGTAAGCACACTTTACATACTGCAAATGGATTTCCATCTCTATACACTATTC  
>HPV58\_Alpha\_222386\_nt0281\_Genome\_Tile\_rc|1  
TCTATACTCACTTATTTTAGATAGCAATCGTAAGCACACTTTACATACTGCAAATGGATT  
>HPV58\_Alpha\_222386\_nt0301\_Genome\_Tile\_rc|1  
TATAGCGAATAATTATAATGTCTATACTCACTTATTTTAGATAGCAATCGTAAGCACACT  
>HPV58\_Alpha\_222386\_nt0541\_Genome\_Tile\_rc|1  
TCTTAGCGTTGGGTTGTTTCCTCTCATGGCGTTGTTACAGGTTACACTTGTGTTTGTCTA  
>HPV58\_Alpha\_222386\_nt1001\_Genome\_Tile\_rc|1  
GTGTAGTACTTTGTACTGAATCATCTATAAACTCTATTAAATCTGTACCACTATCGTCTG  
>HPV58\_Alpha\_222386\_nt1381\_Genome\_Tile\_rc|1  
ATTTTGTAATGGAACAGTATTACAACGTCTACATCCGTTTCACCTGCTTACATCTGAACT  
>HPV58\_Alpha\_222386\_nt1401\_Genome\_Tile\_rc|1  
TTATGTAGAATATTACTAATATTTTGTAATGGAACAGTATTACAACGTCTACATCCGTT  
>HPV58\_Alpha\_222386\_nt3161\_Genome\_Tile\_rc|1  
CCCCACATAGTCAACTTCTCCTGCTACCAAAGTACATGTTGTTTCCCTCAATAATATATAT  
>HPV58\_Alpha\_222386\_nt3201\_Genome\_Tile\_rc|1  
ATTTAAAAATACGTCTTTTCATTGCCATGTATATAATACAACCCACATAGTCAACTTCTC  
>HPV58\_Alpha\_222386\_nt3401\_Genome\_Tile\_rc|1

GGAGTCTGGTAAATCGAGTCGTCGTCGCTTTGTCCCCTGTGTACTTTTCGTTGTTGGTGGC  
>HPV58\_Alpha\_222386\_nt3421\_Genome\_Tile\_rc|1  
GAGTACTGGGTGTTGTCTCTGGAGTCTGGTAAATCGAGTCGTCGTCGCTTTGTCCCCTGT  
>HPV58\_Alpha\_222386\_nt3501\_Genome\_Tile\_rc|1  
CTTTGTATGTACAGTTAGTTGTACTGTGTAGTCCTCCTCCTCGTGGTCTACTGTCCACGG  
>HPV58\_Alpha\_222386\_nt3801\_Genome\_Tile\_rc|1  
GTGGTTTACATACAGTAATTGTACAATACAATTACAATGACATAACACCAGTACTTATTT  
>HPV58\_Alpha\_222386\_nt3881\_Genome\_Tile\_rc|1  
ACAAGCATAAAAACAGTATAAAACAAACAACAAAAATAGGTAATATCATTGTATATACAC  
>HPV58\_Alpha\_222386\_nt3901\_Genome\_Tile\_rc|1  
CAATGGCCGCAAAAAAATGCACAAGCATAAAAACAGTATAAAACAAACAACAAAAATAGG  
>HPV58\_Alpha\_222386\_nt3921\_Genome\_Tile\_rc|1  
TATATAGAAATAGATAGCACC AATGGCCGCAAAAAAATGCACAAGCATAAAAACAGTATA  
>HPV58\_Alpha\_222386\_nt3941\_Genome\_Tile\_rc|1  
CCAACACCAGCAACCAAGCATATATAGAAATAGATAGCACC AATGGCCGCAAAAAAATGC  
>HPV58\_Alpha\_222386\_nt4081\_Genome\_Tile\_rc|1  
TGCAGAACCAGTATACAGTTAGTCTTGTGTTGGGTAAAGTATTGTGCATGAAAATTAATACA  
>HPV58\_Alpha\_222386\_nt4101\_Genome\_Tile\_rc|1  
TACAATACCATAACCACCATGTGCAGAACCAGTATACAGTTAGTCTTGTGTTGGGTAAAGTAT  
>HPV58\_Alpha\_222386\_nt4121\_Genome\_Tile\_rc|1  
CACACACAACAGTAAATATTTACAATACCATAACCACCATGTGCAGAACCAGTATACAGTT  
>HPV58\_Alpha\_222386\_nt4181\_Genome\_Tile\_rc|1  
AAGACAGTGCTAAAAATATAAAAGTATTTATTAGTAAATGTATAAAAAATAATAAAAACAA  
>HPV58\_Alpha\_222386\_nt4441\_Genome\_Tile\_rc|1  
TGTAAGGTATAGCCTCAGACGGTGGGGTACTACCAAGGGGCACATATCCAGTCCTGCCA  
>HPV58\_Alpha\_222386\_nt4461\_Genome\_Tile\_rc|1  
TAACTGGGGGACGTATGGGCTGTAAAGGTATAGCCTCAGACGGTGGGGTACTACCAAGGG  
>HPV58\_Alpha\_222386\_nt5161\_Genome\_Tile\_rc|1  
TGGTAGTAATGTACTTTAGCCCCTATTTGCTTTCCACTGCGAGTACGAAGTGTAGCCTTT  
>HPV58\_Alpha\_222386\_nt5181\_Genome\_Tile\_rc|1  
GCTGTATGGGACTTAAGTCTTGGTAGTAATGTACTTTAGCCCCTATTTGCTTTCCACTGC  
>HPV58\_Alpha\_222386\_nt5221\_Genome\_Tile\_rc|1  
AATTCAAATTGTTGCTGCTGTTGTACCTGTTCCCTGGACAGGCTGTATGGGACTTAAGTCT  
>HPV58\_Alpha\_222386\_nt5241\_Genome\_Tile\_rc|1  
CAGAAGTATTTAAAGATTGTAATTCAAATTGTTGCTGCTGTTGTACCTGTTCCCTGGACAG  
>HPV58\_Alpha\_222386\_nt5261\_Genome\_Tile\_rc|1  
ATTAATACTATAGGGAGAAACAGAAGTATTTAAAGATTGTAATTCAAATTGTTGCTGCTG  
>HPV58\_Alpha\_222386\_nt5281\_Genome\_Tile\_rc|1  
TAAATATCATAAAGTCCATCATTAATACTATAGGGAGAAACAGAAGTATTTAAAGATTGT  
>HPV58\_Alpha\_222386\_nt5321\_Genome\_Tile\_rc|1  
AGGACTCTGAAAATCATGTATAGTATCAGCATCGTCAGCATAAATATCATAAAGTCCATC  
>HPV58\_Alpha\_222386\_nt5341\_Genome\_Tile\_rc|1  
AAGGACGTATGTGAGTGCAGAGGACTCTGAAAATCATGTATAGTATCAGCATCGTCAGCA  
>HPV58\_Alpha\_222386\_nt5361\_Genome\_Tile\_rc|1  
TACTGGTACGTGTGGTGGCAAAGGACGTATGTGAGTGCAGAGGACTCTGAAAATCATGTA  
>HPV58\_Alpha\_222386\_nt5421\_Genome\_Tile\_rc|1  
GACCAGGTTCCAATGACACAAGAGGAGTGTCAAATCCAGTATTTAATGGTATGGACACAT  
>HPV58\_Alpha\_222386\_nt5441\_Genome\_Tile\_rc|1  
TACAGAAGATGCAATGTCTGGACCAGGTTCCAATGACACAAGAGGAGTGTCAAATCCAGT  
>HPV58\_Alpha\_222386\_nt5481\_Genome\_Tile\_rc|1  
TTAGTGGAGATATAGGAATAAATGGACTAGACATAGATGTTACAGAAGATGCAATGTCTG  
>HPV58\_Alpha\_222386\_nt5501\_Genome\_Tile\_rc|1  
AATTATGGTATTTAAAGGAGTTAGTGGAGATATAGGAATAAATGGACTAGACATAGATGT  
>HPV58\_Alpha\_222386\_nt5521\_Genome\_Tile\_rc|1  
ATAAAATCAGCACCATCCACAATTATGGTATTTAAAGGAGTTAGTGGAGATATAGGAATA

>HPV58\_Alpha\_222386\_nt5541\_Genome\_Tile\_rc|1  
TAAATAGCTAGGGTGCACATAAAATCAGCACCATCCACAATTATGGTATTAAAAGGAG  
>HPV58\_Alpha\_222386\_nt5801\_Genome\_Tile\_rc|1  
ACCCTATACTGTAAAGCCTGATACCTTGGGAACATAACTTTTTTTATTGTTATTGGGACTT  
>HPV58\_Alpha\_222386\_nt6441\_Genome\_Tile\_rc|1  
GATAACTGCAGTATTACCGGACCCTTTAATATAAAGGTCATCCGGGACAGCCTCGCCAAG  
>HPV58\_Alpha\_222386\_nt6461\_Genome\_Tile\_rc|1  
GGAAAAAATGCACACTTTTGGATAACTGCAGTATTACCGGACCCTTTAATATAAAGGTCA  
>HPV58\_Alpha\_222386\_nt7121\_Genome\_Tile\_rc|1  
AAACAAACATGTATAATAAAATAGTGTAAGTACCACAACAATTATTTTTTAACCTTTTTG  
>HPV58\_Alpha\_222386\_nt7201\_Genome\_Tile\_rc|1  
AGAACATGTACACAAACATGACACATAACACATACACATATACACAAACATAAACAAAC  
>HPV58\_Alpha\_222386\_nt7261\_Genome\_Tile\_rc|1  
TTTACAATACACACAATAGTTTATTACATATATACAGAAACAGGAAACTGACAAGGACAT  
>HPV58\_Alpha\_222386\_nt7341\_Genome\_Tile\_rc|1  
GTATGCATAATAGGCAGGGCAGGGTAGGGCAATTTAGGGACAGCACCTTACTCATAGATA  
>HPV58\_Alpha\_222386\_nt7361\_Genome\_Tile\_rc|1  
ATACAAATACTATTACATAGGTATGCATAATAGGCAGGGCAGGGTAGGGCAATTTAGGGA  
>HPV58\_Alpha\_222386\_nt7521\_Genome\_Tile\_rc|1  
ATAGGCAAAAGCAGTGCAGGAAGGGAAAGGATTAAGTGTATTGTTAAATTGTAGTTTAA  
>HPV101\_Unclassified\_109390389\_nt0001\_Genome\_Tile\_rc|1  
TAGCACTAAAGGGCTAAGTTCTAACTTTACATCTCCAATAGTTGCCTTTTGTCTCTCAT  
>HPV101\_Unclassified\_109390389\_nt0021\_Genome\_Tile\_rc|1  
TCACATAATAAGTTTGCAGGTAGCACTAAAGGGCTAAGTTCTAACTTTACATCTCCAATA  
>HPV101\_Unclassified\_109390389\_nt0041\_Genome\_Tile\_rc|1  
CCTCCTCGGTTACTAATTCATCACATAATAAGTTTGCAGGTAGCACTAAAGGGCTAAGTT  
>HPV101\_Unclassified\_109390389\_nt0101\_Genome\_Tile\_rc|1  
ACTGCCCAATCTGTCACAATTCTATAAGGGCTTAAAGCTTGCTCGTCCTGCTGCTCCT  
>HPV101\_Unclassified\_109390389\_nt0121\_Genome\_Tile\_rc|1  
TAATGCTAAGGTTTTGTGACACTGCCCACAATCTGTCACAATTCTATAAGGGCTTAAAGC  
>HPV101\_Unclassified\_109390389\_nt0161\_Genome\_Tile\_rc|1  
GTTCCACAGACCTTATTGCCCCGTCCTAGCTAGTACATGTAATGCTAAGGTTTTGTGAC  
>HPV101\_Unclassified\_109390389\_nt0301\_Genome\_Tile\_rc|1  
CATGCCGCTTCTGCGTCAATAAAGTCTATTGCATTATAGTCACAAATGTGAGGGGATGTA  
>HPV101\_Unclassified\_109390389\_nt0321\_Genome\_Tile\_rc|1  
CCAAAGGGTCTAACTCCTCACATGCCGCTTCTGCGTCAATAAAGTCTATTGCATTATAGT  
>HPV101\_Unclassified\_109390389\_nt0341\_Genome\_Tile\_rc|1  
ACTTTCTTCCAATACGGCTTCCAAAGGGTCTAACTCCTCACATGCCGCTTCTGCGTCAAT  
>HPV101\_Unclassified\_109390389\_nt0401\_Genome\_Tile\_rc|1  
GGAATTTCCCTCATCTGGCTCCTCCGTATTGTCTATTAGGTCTGAAATATCTGTCCCATC  
>HPV101\_Unclassified\_109390389\_nt0421\_Genome\_Tile\_rc|1  
TGCTTATTTAACAATGCTAGGGAATTTCCCTCATCTGGCTCCTCCGTATTGTCTATTAGG  
>HPV101\_Unclassified\_109390389\_nt0441\_Genome\_Tile\_rc|1  
GCGTGTGCTCCTCTAGCTGCTGCTTATTTAACAATGCTAGGGAATTTCCCTCATCTGGCT  
>HPV101\_Unclassified\_109390389\_nt0461\_Genome\_Tile\_rc|1  
TTTTAGAAATCTTAAGCTGCTGCGTGTGCTCCTCTAGCTGCTGCTTATTTAACAATGCTAG  
>HPV101\_Unclassified\_109390389\_nt0521\_Genome\_Tile\_rc|1  
CAGTCTTGGGCTCAAATCTATTACTGCTTGTGCTTTGGGCTAGGACTAAAGTACTTTTCG  
>HPV101\_Unclassified\_109390389\_nt0541\_Genome\_Tile\_rc|1  
GACGATACACGCAACTGTTGCAGTCTTGGGCTCAAATCTATTACTGCTTGTGCTTTGGG  
>HPV101\_Unclassified\_109390389\_nt0581\_Genome\_Tile\_rc|1  
ACTGTCTCAAATACCAGCCGTCTTTTACTGGATCCTTGGGACGATACACGCAACTGTTG  
>HPV101\_Unclassified\_109390389\_nt0721\_Genome\_Tile\_rc|1  
CATGGCCCCCAGATCTAGTCTCTACATCTGTGCTGACGTCTTCATTGGTTTCGGGCTCC  
>HPV101\_Unclassified\_109390389\_nt0741\_Genome\_Tile\_rc|1

TACTGGTTGTTGTGCCGCCACATGGCCCCCAGATCTAGTCTCTACATCTGTGCTGACGT  
>HPV101\_Unclassified\_109390389\_nt0801\_Genome\_Tile\_rc|1  
CAGTGGCTTCTCTATTACTACTATGCAATAGGTCTATACAATTGTTGTTACTATTATTGT  
>HPV101\_Unclassified\_109390389\_nt0821\_Genome\_Tile\_rc|1  
GGCTTTAAATTTTGCATATGCAGTGGCTTCTCTATTACTACTATGCAATAGGTCTATACA  
>HPV101\_Unclassified\_109390389\_nt0861\_Genome\_Tile\_rc|1  
TGAATGGTCTTGTTAATTCCTTATATCCCACATCAAATGTGGCTTTAAATTTTGCATATG  
>HPV101\_Unclassified\_109390389\_nt0881\_Genome\_Tile\_rc|1  
GCAACAGCTTTTATTACTTATGAATGGTCTTGTTAATTCCTTATATCCCACATCAAATGT  
>HPV101\_Unclassified\_109390389\_nt0921\_Genome\_Tile\_rc|1  
TTTCTGCTACCACCCCAAATATCCCCGCTATCCAAGTGCAGCAACAGCTTTTATTACTTA  
>HPV101\_Unclassified\_109390389\_nt1001\_Genome\_Tile\_rc|1  
AACGCCCCGTCCCCATGCTTGGATTTATAATTTGCAGGTATTACAAATGTGGTTGCAGTAA  
>HPV101\_Unclassified\_109390389\_nt1041\_Genome\_Tile\_rc|1  
GACATTTTGCAGCATAAACTGAAACAACATCATTACTGTAACGCCCGTCCCCATGCTTG  
>HPV101\_Unclassified\_109390389\_nt1061\_Genome\_Tile\_rc|1  
TAAATTTATTACAGTATCCCGACATTTTGCAGCATAAACTGAAACAACATCATTACTGT  
>HPV101\_Unclassified\_109390389\_nt1101\_Genome\_Tile\_rc|1  
TTATAATTTGCCATTCCCGTACATGCAATACATTACACAATAAATTTATTACAGTATCCC  
>HPV101\_Unclassified\_109390389\_nt1121\_Genome\_Tile\_rc|1  
CCTATGCTTTGGTGGATTAGTTATAATTTGCCATTCCCGTACATGCAATACATTACACAA  
>HPV101\_Unclassified\_109390389\_nt1141\_Genome\_Tile\_rc|1  
TATAATGCTACAGCAACACTCCTATGCTTTTGGTGGATTAGTTATAATTTGCCATTCCCGT  
>HPV101\_Unclassified\_109390389\_nt1181\_Genome\_Tile\_rc|1  
ATAACAATAGCTAACATTAGACATACTTGTTTATAAAAAGTATAATGCTACAGCAACACT  
>HPV101\_Unclassified\_109390389\_nt1201\_Genome\_Tile\_rc|1  
ATCCACTCTGGCATTGCTCCATAACAATAGCTAACATTAGACATACTTGTTTATAAAAAG  
>HPV101\_Unclassified\_109390389\_nt1261\_Genome\_Tile\_rc|1  
ATAGTTGCAAATTCAAAGTTGTCTGACTCCTGTTGATGATTAACCAATGTTTGTTTTTTA  
>HPV101\_Unclassified\_109390389\_nt1341\_Genome\_Tile\_rc|1  
TATCGTCGTCTGCAAGGCTTGCATATCCATAAGCAACTTCTGCCTCATCTCTAATATTAT  
>HPV101\_Unclassified\_109390389\_nt1421\_Genome\_Tile\_rc|1  
TTTATACATTGCAACCATTTGTACACAGTCTTTTACATATTTGAATTGATTATTACATTT  
>HPV101\_Unclassified\_109390389\_nt1521\_Genome\_Tile\_rc|1  
TTAAAAAATTAATAATATTTTTTCCAATTGCCTTCTTCTGTTACACGTTCTCCACATTTCA  
>HPV101\_Unclassified\_109390389\_nt1581\_Genome\_Tile\_rc|1  
TTCCTTGTAAGGAAGTATCTTAATGTTGTTAAAAATGCCACTATAGATATTTCTTGATATT  
>HPV101\_Unclassified\_109390389\_nt1601\_Genome\_Tile\_rc|1  
TAAACAGTTTTTTTTTGGCCTTCCTTGTAAGGAAGTATCTTAATGTTGTTAAAAATGCCAC  
>HPV101\_Unclassified\_109390389\_nt1681\_Genome\_Tile\_rc|1  
GATACCACCTTACCTTGGGTATATTTTATTAAGCTATAGCAAAACATTGATTTGCCCGTA  
>HPV101\_Unclassified\_109390389\_nt1701\_Genome\_Tile\_rc|1  
GGCTTCTGCTATTTACAAACGATACCACCTTACCTTGGGTATATTTTATTAAGCTATAGC  
>HPV101\_Unclassified\_109390389\_nt1881\_Genome\_Tile\_rc|1  
TAGAGGTTAGAAGTAATGGCGGTAGTTTTAATTGTATTGGTGCCTTATGCTTTACATCTA  
>HPV101\_Unclassified\_109390389\_nt1921\_Genome\_Tile\_rc|1  
TGTAATATTTTAAATGGGGCTTCTGCATGTACTTCAATGTTAGAGGTTAGAAGTAATGGC  
>HPV101\_Unclassified\_109390389\_nt1941\_Genome\_Tile\_rc|1  
TGTATTCTTGAATTCTGCTATGTAAATATTTAATGGGGCTTCTGCATGTACTTCAATGT  
>HPV101\_Unclassified\_109390389\_nt1961\_Genome\_Tile\_rc|1  
ACGCAATTTATTTGGAAATTTGTATTCTTGAATTCTGCTATGTAAATATTTAATGGGGC  
>HPV101\_Unclassified\_109390389\_nt1981\_Genome\_Tile\_rc|1  
GGATTTCCATTTGCATCTAAACGCAATTTATTTGGAAATTTGTATTCTTGAATTCTGCTA  
>HPV101\_Unclassified\_109390389\_nt2001\_Genome\_Tile\_rc|1  
CATCAGTAATTGTTATTATTGGATTTCCATTTGCATCTAAACGCAATTTATTTGGAAATT

>HPV101\_Unclassified\_109390389\_nt2061\_Genome\_Tile\_rc|1  
CGTCTGGATCGCCCAGGTCTAATTGCTTCCACAGTTTACTAAAAAAGATTTCCAATCTG  
>HPV101\_Unclassified\_109390389\_nt2081\_Genome\_Tile\_rc|1  
AGGGTCTCCATCTGAGCTGTCGTCTGGATCGCCCAGGTCTAATTGCTTCCACAGTTTACT  
>HPV101\_Unclassified\_109390389\_nt2161\_Genome\_Tile\_rc|1  
CTATTTGTCCATCTATGTCTGTGCGGCCTGCTTCATAAATCCCCAGTAGCCTGTCTTGCA  
>HPV101\_Unclassified\_109390389\_nt2181\_Genome\_Tile\_rc|1  
CCTTACAAGGTCCCAATGTACTATTTGTCCATCTATGTCTGTGCGGCCTGCTTCATAAAT  
>HPV101\_Unclassified\_109390389\_nt2201\_Genome\_Tile\_rc|1  
TGCAGTAATACATATTCCTGCCTTACAAGGTCCCAATGTACTATTTGTCCATCTATGTCT  
>HPV101\_Unclassified\_109390389\_nt2221\_Genome\_Tile\_rc|1  
TACCGTTTTTTCTGGCATAGTGCAGTAATACATATTCCTGCCTTACAAGGTCCCAATGTA  
>HPV101\_Unclassified\_109390389\_nt2241\_Genome\_Tile\_rc|1  
TTGTATGCCCAAATTGCTAATACCGTTTTTTCTGGCATAGTGCAGTAATACATATTCCTG  
>HPV101\_Unclassified\_109390389\_nt2261\_Genome\_Tile\_rc|1  
GTGGCCAATGACGGTACTTTTTGTATGCCCAAATTGCTAATACCGTTTTTTCTGGCATAG  
>HPV101\_Unclassified\_109390389\_nt2341\_Genome\_Tile\_rc|1  
GTTTCATTTCCAAATGCAGAGTTCTTTAGACTTTTTAGCACTATGCCCATTAATATAGCCT  
>HPV101\_Unclassified\_109390389\_nt2361\_Genome\_Tile\_rc|1  
TGTATCTGTCAATGTCCATTGTTTCATTTCCAAATGCAGAGTTCTTTAGACTTTTTAGCAC  
>HPV101\_Unclassified\_109390389\_nt2421\_Genome\_Tile\_rc|1  
TATGGTTTTTCCTTGTTTTTTTAAATGTATGCGATGGAGGTGTCATAAACAGTTCATAGCT  
>HPV101\_Unclassified\_109390389\_nt2441\_Genome\_Tile\_rc|1  
TTATTTCCATACCACACCTCTATGGTTTTTTCCTTGTTTTTTTAAATGTATGCGATGGAGGT  
>HPV101\_Unclassified\_109390389\_nt2461\_Genome\_Tile\_rc|1  
ATGGCACTGCATTGTCCTCATTATTTCCATACCACACCTCTATGGTTTTTCCTTGTTTTT  
>HPV101\_Unclassified\_109390389\_nt2541\_Genome\_Tile\_rc|1  
GCCGTCTGCAGATACCTGTCCACGGGCCTTGTAACCAATTGTCCTGTGCGTCTTGTAATA  
>HPV101\_Unclassified\_109390389\_nt2561\_Genome\_Tile\_rc|1  
TCCCAGTCTATATAGTACAGGCCGTCTGCAGATACCTGTCCACGGGCCTGTACCAATTG  
>HPV101\_Unclassified\_109390389\_nt2581\_Genome\_Tile\_rc|1  
CATAGAAATGTTTATTTCTTCCCAGTCTATATAGTACAGGCCGTCTGCAGATACCTGTC  
>HPV101\_Unclassified\_109390389\_nt2601\_Genome\_Tile\_rc|1  
TGCCTCATCTGCAAACCGCACATAGAAATGTTTATTTCTTCCCAGTCTATATAGTACAG  
>HPV101\_Unclassified\_109390389\_nt2641\_Genome\_Tile\_rc|1  
CAGTTCGTACTTGCCATTCAATTTGCTGCATCAAATTGTGTTGCCTCATCTGCAAACCGCA  
>HPV101\_Unclassified\_109390389\_nt2661\_Genome\_Tile\_rc|1  
ATTAGATATTATTTCACTTTTCAGTTTCGTACTTGCCATTCAATTTGCTGCATCAAATTGTGT  
>HPV101\_Unclassified\_109390389\_nt2741\_Genome\_Tile\_rc|1  
TCGTGTCTGGAAGTTTCATAGGTGATGGCAGAAGATCCAGTAGGCCTCGGGTCGCTCCGT  
>HPV101\_Unclassified\_109390389\_nt2761\_Genome\_Tile\_rc|1  
ATCTCCTAGTCCTCCTCGTGTCTGTTGGAAGTTTCATAGGTGATGGCAGAAGATCCAG  
>HPV101\_Unclassified\_109390389\_nt2801\_Genome\_Tile\_rc|1  
GTCGCGGATGGGCTGGGGACGGTCGGGGTCTTTTAGTAGATCTCCTAGTCCTCCTCGTG  
>HPV101\_Unclassified\_109390389\_nt2861\_Genome\_Tile\_rc|1  
CTTTGTTGGATTTCGTCGGCTTCTGGTATGGTGCCAGGGGTATCGCTTTCGGTCGCCGAT  
>HPV101\_Unclassified\_109390389\_nt2881\_Genome\_Tile\_rc|1  
GTCGTTGGGATTTATGTTTTCTTTGTTGGATTCTGTCGGCTTCTGGTATGGTGCCAGGGG  
>HPV101\_Unclassified\_109390389\_nt2901\_Genome\_Tile\_rc|1  
AGACTCGGATCCCCACCTGGGTCGTTGGGATTTATGTTTTCTTTGTTGGATTCTGTCGGCT  
>HPV101\_Unclassified\_109390389\_nt2921\_Genome\_Tile\_rc|1  
GATGAAGGAGACTGGATAGGAGACTCGGATCCCCACCTGGGTCGTTGGGATTTATGTTTT  
>HPV101\_Unclassified\_109390389\_nt2961\_Genome\_Tile\_rc|1  
ACGATAGTGTCTATTAGGCAGTCGATGTCTTGCCCCACTGATGAAGGAGACTGGATAGG  
>HPV101\_Unclassified\_109390389\_nt3041\_Genome\_Tile\_rc|1

CATTTGGTAGTATTTGCAGGCCCTTTAATAAGTATTACTGGCGGATCCCTAGCCTCGTCT  
>HPV101\_Unclassified\_109390389\_nt3101\_Genome\_Tile\_rc|1  
AATGCAGTGCTTATACTTTCAAATAGCGCCCTATAATTTTGTTCATTCTATACCTCCAA  
>HPV101\_Unclassified\_109390389\_nt3121\_Genome\_Tile\_rc|1  
CCCTATCACCTACCCATGAAATGCAGTGCTTATACTTTCAAATAGCGCCCTATAATTTT  
>HPV101\_Unclassified\_109390389\_nt3161\_Genome\_Tile\_rc|1  
AATGCTACTAATACCCTACTACACCCTACCCTATCTGAGCCCCTATCACCTACCCATGAA  
>HPV101\_Unclassified\_109390389\_nt3221\_Genome\_Tile\_rc|1  
TGTGTACCCTTTGGTAACTTCACAGTATGTAAAAACCTTTCCCGTTGGCTATTATTTCTA  
>HPV101\_Unclassified\_109390389\_nt3241\_Genome\_Tile\_rc|1  
CCAGGTTTCCAAATGAAAACCTGTGTACCCTTTGGTAACTTCACAGTATGTAAAAACCTTT  
>HPV101\_Unclassified\_109390389\_nt3261\_Genome\_Tile\_rc|1  
CATGTGTGGTTACAGGGATTCCAGGTTTCCAAATGAAAACCTGTGTACCCTTTGGTAACTT  
>HPV101\_Unclassified\_109390389\_nt3281\_Genome\_Tile\_rc|1  
CAAATAGGCAGCATTACTGGCATGTGTGGTTACAGGGATTCCAGGTTTCCAAATGAAAAC  
>HPV101\_Unclassified\_109390389\_nt3341\_Genome\_Tile\_rc|1  
CAAAAGAAGTATAATATACAAGGTACACAAAATCACAAGAGGCAGATGTGATGCTATTTA  
>HPV101\_Unclassified\_109390389\_nt3401\_Genome\_Tile\_rc|1  
ACGCTTTTCGCCTACGTGCATGTGGAGGCTCCATTGATTATACAAGGTAGCAAAGCAGTA  
>HPV101\_Unclassified\_109390389\_nt3421\_Genome\_Tile\_rc|1  
TATATATTTTCAACTGTGTACGCTTTTCGCCTACGTGCATGTGGAGGCTCCATTGATTAT  
>HPV101\_Unclassified\_109390389\_nt3461\_Genome\_Tile\_rc|1  
AACATCATCAGGGCATGTACCAGACAGGGCACAATGCCTGTATATATTTTCAACTGTGTC  
>HPV101\_Unclassified\_109390389\_nt3521\_Genome\_Tile\_rc|1  
AATACTTGCAATCCATTTTAATATCCTATCTGCAATGGTATTATTTTCCACTTTATTTTT  
>HPV101\_Unclassified\_109390389\_nt3681\_Genome\_Tile\_rc|1  
TGGGTACAATATCAGATGGTCTACAGGATCCAAAACAACCCAGGACGTAGTACAGTAC  
>HPV101\_Unclassified\_109390389\_nt3701\_Genome\_Tile\_rc|1  
AGTAGGTGATATAGGATCAATGGGTACAATATCAGATGGTCTACAGGATCCAAAACAAC  
>HPV101\_Unclassified\_109390389\_nt3721\_Genome\_Tile\_rc|1  
AAAGGAACAATAGAGGATGCAGTAGGTGATATAGGATCAATGGGTACAATATCAGATGGT  
>HPV101\_Unclassified\_109390389\_nt3741\_Genome\_Tile\_rc|1  
GTGTTTCAGGTACAGTCTCCAAAGGAACAATAGAGGATGCAGTAGGTGATATAGGATCAA  
>HPV101\_Unclassified\_109390389\_nt3761\_Genome\_Tile\_rc|1  
CACAGGAACATCAGGTATTTGTGTTTCAGGTACAGTCTCCAAAGGAACAATAGAGGATGC  
>HPV101\_Unclassified\_109390389\_nt3821\_Genome\_Tile\_rc|1  
AATATCTGATACAGGGTCAGTACCAACGGTAACCTCCAATTCACCTCCAACAGGGGGTCG  
>HPV101\_Unclassified\_109390389\_nt3861\_Genome\_Tile\_rc|1  
GGTCTATGGGTGTAATAGCAGGCGAGGTGGCCTCTATAGTAATATCTGATACAGGGTCAG  
>HPV101\_Unclassified\_109390389\_nt3901\_Genome\_Tile\_rc|1  
GTAGATGTAGGAGGTTGTGCCTCAATAACGGCACTTGTGGGGTCTATGGGTGTAATAGCA  
>HPV101\_Unclassified\_109390389\_nt3921\_Genome\_Tile\_rc|1  
TTACTGAAACACGCTTAGGAGTAGATGTAGGAGGTTGTGCCTCAATAACGGCACTTGTGG  
>HPV101\_Unclassified\_109390389\_nt3941\_Genome\_Tile\_rc|1  
ATTAACATGCCGTGTGCTTGTACTGAAACACGCTTAGGAGTAGATGTAGGAGGTTGTGC  
>HPV101\_Unclassified\_109390389\_nt3961\_Genome\_Tile\_rc|1  
TATACCGATATGTAAGAAGGATTAACATGCCGTGTGCTTGTACTGAAACACGCTTAGGA  
>HPV101\_Unclassified\_109390389\_nt4041\_Genome\_Tile\_rc|1  
TAATAACCCGTCCTCACCACAGCTGCCCTACAAACACCTCAGCACCAGCCTGTGTTA  
>HPV101\_Unclassified\_109390389\_nt4061\_Genome\_Tile\_rc|1  
AGGTATAGATTCACCTATACTAATAACCCGTCCCTCACCACAGCTGCCCTACAAACAC  
>HPV101\_Unclassified\_109390389\_nt4161\_Genome\_Tile\_rc|1  
AGGCCCTTTGAAATACACGAGGGGTACTGGTCCGTGGGGGCGTAACAGCCTCCTCAATAG  
>HPV101\_Unclassified\_109390389\_nt4181\_Genome\_Tile\_rc|1  
AAGGTCCCGTGCACGTTGAAAGGCCCTTTGAAATACACGAGGGGTACTGGTCCGTGGGGG



>HPV101\_Unclassified\_109390389\_nt4201\_Genome\_Tile\_rc|1  
TGTTGTACACGTCTGTTATAAAGGTCCCGTGCACGTTGAAAGGCCCTTTGAAATACACGA  
>HPV101\_Unclassified\_109390389\_nt4221\_Genome\_Tile\_rc|1  
CCATATTGTGTGTTTGTACTTGTGTACACGTCTGTTATAAAGGTCCCGTGCACGTTGAA  
>HPV101\_Unclassified\_109390389\_nt4461\_Genome\_Tile\_rc|1  
CTATTTGTAATCCACTGCGTGTTACAATAGTGCCCCGGCGACCTAGGCGACTAAGACGCA  
>HPV101\_Unclassified\_109390389\_nt4501\_Genome\_Tile\_rc|1  
TCTATAGAGCTGAAATCATAATAAAAAATGCACATTGGATCCTATTTGTAATCCACTGCGT  
>HPV101\_Unclassified\_109390389\_nt4521\_Genome\_Tile\_rc|1  
GCAATTCAACTGAGCCAGCATCTATAGAGCTGAAATCATAATAAAAAATGCACATTGGATC  
>HPV101\_Unclassified\_109390389\_nt4581\_Genome\_Tile\_rc|1  
TGTTAGCAGATGCTAAGCCATCAACAATAGAGGCCACCCAGATTGCTGACCAAGTGGTT  
>HPV101\_Unclassified\_109390389\_nt4621\_Genome\_Tile\_rc|1  
GTATGACCTTCTATAAAAGATGTTTCAGCACTGCCATTAATGTTAGCAGATGCTAAGCCA  
>HPV101\_Unclassified\_109390389\_nt4641\_Genome\_Tile\_rc|1  
CACCCGTAGGGCCAACAAGTGTATGACCTTCTATAAAAGATGTTTCAGCACTGCCATTAA  
>HPV101\_Unclassified\_109390389\_nt4661\_Genome\_Tile\_rc|1  
CGTGTCAACAAGTCAGCCTCACCCGTAGGGCCAACAAGTGTATGACCTTCTATAAAAGA  
>HPV101\_Unclassified\_109390389\_nt4681\_Genome\_Tile\_rc|1  
CTTCCAAACTCTTCTGAGTACGTGTCATACAAGTCAGCCTCACCCGTAGGGCCAACAAGT  
>HPV101\_Unclassified\_109390389\_nt4701\_Genome\_Tile\_rc|1  
GTGTAAGTAACAATCGAGAACTTCCAAACTCTTCTGAGTACGTGTCATACAAGTCAGCCT  
>HPV101\_Unclassified\_109390389\_nt4741\_Genome\_Tile\_rc|1  
CGAACCAAAGGAGGGACCTGAACAGCAGGAACCTGCCTGAGGTGTAAGTAACAATCGAGAA  
>HPV101\_Unclassified\_109390389\_nt4781\_Genome\_Tile\_rc|1  
TAAGATTTGTAGGGCTGTGCCTGGAGGAAGTGTCAGGACACGAACCAAAGGAGGGACCTG  
>HPV101\_Unclassified\_109390389\_nt4801\_Genome\_Tile\_rc|1  
AGACCCCTACATCTGAGAGTAAGATTTGTAGGGCTGTGCCTGGAGGAAGTGTCAGGACA  
>HPV101\_Unclassified\_109390389\_nt4821\_Genome\_Tile\_rc|1  
AAGGCACAGAAAAAGGTACAAGACCCCTACATCTGAGAGTAAGATTTGTAGGGCTGTGC  
>HPV101\_Unclassified\_109390389\_nt4841\_Genome\_Tile\_rc|1  
AGGAATAACAGGATGTACAGAAGGCACAGAAAAAGGTACAAGACCCCTACATCTGAGAG  
>HPV101\_Unclassified\_109390389\_nt4901\_Genome\_Tile\_rc|1  
AAATGCATCAAAACCATCCACAACAATAGGAGGTTTCAGACACATCTGGAAACACAGTGCC  
>HPV101\_Unclassified\_109390389\_nt4921\_Genome\_Tile\_rc|1  
GGATGCAATAAAATGTATCAAATGCATCAAAACCATCCACAACAATAGGAGGTTTCAGAC  
>HPV101\_Unclassified\_109390389\_nt5041\_Genome\_Tile\_rc|1  
TCCTAGACACAGGAGGAGCTGGAGGTAGGTATATTTTACCAGTCTGAGGTAGCCACAAAC  
>HPV101\_Unclassified\_109390389\_nt5081\_Genome\_Tile\_rc|1  
AATACAGATGTTTCCACAACATATTCATCGGTGGTAAGACTCCTAGACACAGGAGGAGCT  
>HPV101\_Unclassified\_109390389\_nt5161\_Genome\_Tile\_rc|1  
CAACGGTGTGATTGCCTGGTTTTATAACGGGAAAATAGGGGTGACCCACAGTTACTAGAC  
>HPV101\_Unclassified\_109390389\_nt5181\_Genome\_Tile\_rc|1  
GCCAGAAACCTTAGGAACCTCAACGGTGTGATTGCCTGGTTTTATAACGGGAAAATAGGG  
>HPV101\_Unclassified\_109390389\_nt5221\_Genome\_Tile\_rc|1  
TGGGATCTGGGAGACGTAGGCGAAAAGCCCTAAACTGGTTGCCAGAAACCTTAGGAACCT  
>HPV101\_Unclassified\_109390389\_nt5301\_Genome\_Tile\_rc|1  
AATATCAATTCCCTCTAAGACGCCACACGAGGCGCTCCGATTCAACATTATACAATTGTTT  
>HPV101\_Unclassified\_109390389\_nt5421\_Genome\_Tile\_rc|1  
AACATTTTGTCTAGCGTCCTTAGCACCAACCTTTTGATATCCATTAGGATTTTCAGTATC  
>HPV101\_Unclassified\_109390389\_nt5441\_Genome\_Tile\_rc|1  
GTTTGTTTAGGATCCATAGAAACATTTTGTCTAGCGTCCTTAGCACCAACCTTTTGATAT  
>HPV101\_Unclassified\_109390389\_nt5561\_Genome\_Tile\_rc|1  
ATAACAGAGGACCAACTGTAAAGGAGGACAGGTGCCTTTAGGAGGATTTTGTGCACAT  
>HPV101\_Unclassified\_109390389\_nt5661\_Genome\_Tile\_rc|1

AGTATCTGCAACAATATCTAGGGGTACCCCTGAGTGATCAGCCTGCAAGGCAGCAAAATT  
>HPV101\_Unclassified\_109390389\_nt5681\_Genome\_Tile\_rc|1  
AGAAAGTCTGGCCATTTACAAGTATCTGCAACAATATCTAGGGGTACCCCTGAGTGATCA  
>HPV101\_Unclassified\_109390389\_nt5741\_Genome\_Tile\_rc|1  
ACCTGCTCGCGGCGGCCAAAGAAAAACATACCATCCCCAACCTATCATTGGCCATACCA  
>HPV101\_Unclassified\_109390389\_nt5761\_Genome\_Tile\_rc|1  
TGAAATAATGACGTGCATACACCTGCTCGCGGCGGCCAAAGAAAAACATACCATCCCCAA  
>HPV101\_Unclassified\_109390389\_nt5861\_Genome\_Tile\_rc|1  
TGATGCTGGTCCTGGCCTTGCTCAGCACCAATAAAATACTTTTTACCATTACCCTCAAAC  
>HPV101\_Unclassified\_109390389\_nt5881\_Genome\_Tile\_rc|1  
AATATAAAGAGGGAGCCAGCTGATGCTGGTCTGGCCTTGCTCAGCACCAATAAAATACT  
>HPV101\_Unclassified\_109390389\_nt5981\_Genome\_Tile\_rc|1  
CATAATACAGCATTATTAGCACCCCTGAGCCCGTTCAATCCAGTAGGGCTACTAAATAAC  
>HPV101\_Unclassified\_109390389\_nt6001\_Genome\_Tile\_rc|1  
TAACAAATACATTATTATTCCATAATACAGCATTATTAGCACCCCTGAGCCCGTTCAATCC  
>HPV101\_Unclassified\_109390389\_nt6021\_Genome\_Tile\_rc|1  
GTGGGTATTATCAACCAAAGTAACAAATACATTATTATTCCATAATACAGCATTATTAGC  
>HPV101\_Unclassified\_109390389\_nt6041\_Genome\_Tile\_rc|1  
TTAATAGTAAAATTCACATTGTGGGTATTATCAACCAAAGTAACAAATACATTATTATTC  
>HPV101\_Unclassified\_109390389\_nt6061\_Genome\_Tile\_rc|1  
TATTATCTTCTGTAGCAACATTAATAGTAAAATTCACATTGTGGGTATTATCAACCAAAG  
>HPV101\_Unclassified\_109390389\_nt6081\_Genome\_Tile\_rc|1  
TGCAGAATCATAGGACTGAATATTATCTTCTGTAGCAACATTAATAGTAAAATTCACATT  
>HPV101\_Unclassified\_109390389\_nt6101\_Genome\_Tile\_rc|1  
CTGAGGTAGTGCTTGTACTTTGCAGAATCATAGGACTGAATATTATCTTCTGTAGCAACA  
>HPV101\_Unclassified\_109390389\_nt6121\_Genome\_Tile\_rc|1  
TTTCAAATTCCTCCACATGTCTGAGGTAGTGCTTGTACTTTGCAGAATCATAGGACTGAA  
>HPV101\_Unclassified\_109390389\_nt6161\_Genome\_Tile\_rc|1  
GGAGTAAGAGACACTTTACAGAGCTGCACAATGAGAGAAATTTCAAATTCCTCCACATGT  
>HPV101\_Unclassified\_109390389\_nt6181\_Genome\_Tile\_rc|1  
GTATGTGTGCCAATACATCGGGAGTAAGAGACACTTTACAGAGCTGCACAATGAGAGAAA  
>HPV101\_Unclassified\_109390389\_nt6201\_Genome\_Tile\_rc|1  
AATAGAGGGATTCATTAAAGTGTATGTGTGCCAATACATCGGGAGTAAGAGACACTTTACA  
>HPV101\_Unclassified\_109390389\_nt6221\_Genome\_Tile\_rc|1  
CCTAATTGCCATTCATCCAGAATAGAGGGATTCATTAAAGTGTATGTGTGCCAATACATCG  
>HPV101\_Unclassified\_109390389\_nt6241\_Genome\_Tile\_rc|1  
TAGACGGTGGAGCCGCAATACCTAATTGCCATTCATCCAGAATAGAGGGATTCATTAAAGT  
>HPV101\_Unclassified\_109390389\_nt6261\_Genome\_Tile\_rc|1  
GTAAGTGGTTTTCAATAGAGGTAGACGGTGGAGCCGCAATACCTAATTGCCATTCATCCAG  
>HPV101\_Unclassified\_109390389\_nt6281\_Genome\_Tile\_rc|1  
GCAAGAGAATCAATATATCTGTAAGTGGTTTTCAATAGAGGTAGACGGTGGAGCCGCAATA  
>HPV101\_Unclassified\_109390389\_nt6341\_Genome\_Tile\_rc|1  
GACATTTTGTTCATATGGATCTTCCTTTTCTTAGGAGGCTCTGCTGTGGGACACATTGTA  
>HPV101\_Unclassified\_109390389\_nt6401\_Genome\_Tile\_rc|1  
CCAAGAGGATAGGCCCTAATTCAGAGGACATTCTGTCTGATAAATCAACCACCCAAAAA  
>HPV101\_Unclassified\_109390389\_nt6421\_Genome\_Tile\_rc|1  
TTTGATGTAAAAAGCGCCTACCAAGAGGATAGGCCCTAATTCAGAGGACATTCTGTCTG  
>HPV101\_Unclassified\_109390389\_nt6441\_Genome\_Tile\_rc|1  
CGCAGGCCGGGCGAGACCCTGTTTGATGTAAAAAGCGCCTACCAAGAGGATAGGCCCTAA  
>HPV101\_Unclassified\_109390389\_nt6521\_Genome\_Tile\_rc|1  
TAAACTTGCTGCGTCGGCGTTTGGAAGACCTGGAGGTAGGCCTGGTAGGCGTAGAAGGA  
>HPV101\_Unclassified\_109390389\_nt6581\_Genome\_Tile\_rc|1  
TAAGAGTATAGAAATGTAAAATGTACAGAGGTAGGAATGTTGTAAAATACATATAATGTT  
>HPV101\_Unclassified\_109390389\_nt6641\_Genome\_Tile\_rc|1  
GAGTCAGAAGAAATAACTCATACAACGACAATGTTGACATGCTACATACTTTATTTATTA

>HPV101\_Unclassified\_109390389\_nt6681\_Genome\_Tile\_rc|1  
CCAAATACTAAAAGCCCAGGTGTGGCCAAAATACTGCCCTGAGTCAGAAGAAATAACTCA  
>HPV101\_Unclassified\_109390389\_nt6821\_Genome\_Tile\_rc|1  
AGTAATACATTTGTTTAAAACATGAACATACCTGCTGGCAAATTTGGCAGCAAATGTACCA  
>HPV101\_Unclassified\_109390389\_nt6841\_Genome\_Tile\_rc|1  
AAAACGTTGCAAAACACATGAGTAATACATTTGTTTAAAACATGAACATACCTGCTGGCAA  
>HPV101\_Unclassified\_109390389\_nt6861\_Genome\_Tile\_rc|1  
GTGGAATGTAGCCAGTACCTAAAACGTTGCAAAACACATGAGTAATACATTTGTTTAAAAC  
>HPV101\_Unclassified\_109390389\_nt6901\_Genome\_Tile\_rc|1  
AATAAGAGAAAAAGGCACTGTAAAAGCACCGCTCCCGGTTGTGGAATGTAGCCAGTACCT  
>HPV101\_Unclassified\_109390389\_nt7001\_Genome\_Tile\_rc|1  
CAAAGGACCGTTGTATAGGCCCCCTGCTGTATATATAGACACTGCCACACCACTCCCG  
>HPV101\_Unclassified\_109390389\_nt7041\_Genome\_Tile\_rc|1  
GTCCCCAGTCTACCTCCCAGTACATGCACACAGGCGGTTCGAAAAGGACCGTTGTATAGG  
>HPV101\_Unclassified\_109390389\_nt7081\_Genome\_Tile\_rc|1  
ATAAGCAGTAATATAGGTACAATATTCATAACATTACACAGTCCCCAGTCTACCTCCCAG  
>HPV101\_Unclassified\_109390389\_nt7101\_Genome\_Tile\_rc|1  
CACAAATATACAATTGCCACATAAGCAGTAATATAGGTACAATATTCATAACATTACACA  
>HPV101\_Unclassified\_109390389\_nt7161\_Genome\_Tile\_rc|1  
CCCGTATTCCCAACAATAAAAATATCTTAATAAGGCTAAGCACAGTAATTAAAAACACAA  
>HPV101\_Unclassified\_109390389\_nt7181\_Genome\_Tile\_rc|1  
CAACTGGCCGTGTCCCTATACCCGTATTCCCAACAATAAAAATATCTTAATAAGGCTAAG  
>HPV103\_Unclassified\_109390382\_nt0001\_Genome\_Tile\_rc|1  
TAATACTAAACTATGTAGTTCTAAGTTAATATCTTTAATTGTTGGTTTCTTTCCCTCAT  
>HPV103\_Unclassified\_109390382\_nt0021\_Genome\_Tile\_rc|1  
CCACAGAGTAAATTTTGTGGTAATACTAAACTATGTAGTTCTAAGTTAATATCTTTAATT  
>HPV103\_Unclassified\_109390382\_nt0041\_Genome\_Tile\_rc|1  
CCTCCTCCACAAGTTCTTACCACAGAGTAAATTTTGTGGTAATACTAAACTATGTAGTT  
>HPV103\_Unclassified\_109390382\_nt0141\_Genome\_Tile\_rc|1  
TCCGTGGCTACCACATACATACACAATGACTTCTCACAATACTTGCAATCTGTCACCACC  
>HPV103\_Unclassified\_109390382\_nt0161\_Genome\_Tile\_rc|1  
CAAAGTTTCTAATGCCCTCCTCCGTGGCTACCACATACATACACAATGACTTCTCACAAT  
>HPV103\_Unclassified\_109390382\_nt0301\_Genome\_Tile\_rc|1  
TCTGTTTCTATAAACTCACAAGCATTTGCTGTAATGTCAGTAAAGCAAGATGTACCTTTA  
>HPV103\_Unclassified\_109390382\_nt0341\_Genome\_Tile\_rc|1  
TAATGCTTCCAATGAATCTAAACCATCCTCACAGGTCGCTTCTGTTTCTATAAACTCACA  
>HPV103\_Unclassified\_109390382\_nt0401\_Genome\_Tile\_rc|1  
ATCAGGTTTCATCAATATTTTCTATTAGTTCTGAAATATCTGTCCCATCGCTCTCTTCAAA  
>HPV103\_Unclassified\_109390382\_nt0421\_Genome\_Tile\_rc|1  
AGTGCTTGGGGATTCCCCCTATCAGGTTCAATATTTTCTATTAGTTCTGAAATATCT  
>HPV103\_Unclassified\_109390382\_nt0461\_Genome\_Tile\_rc|1  
TAGTAGCTGACTGTCTTCTTAGCTGTTGCCATTTTAAACAGTGCTTGGGGATTCCCCCT  
>HPV103\_Unclassified\_109390382\_nt0541\_Genome\_Tile\_rc|1  
CACAGCGCTTCAAGTCGTGGGCTTAAATCTATTACCCGCTGCTTCGGGCTAGGACTAACA  
>HPV103\_Unclassified\_109390382\_nt0561\_Genome\_Tile\_rc|1  
TGGATCCTCGTGGCGACACACAGCGCTTCAAGTCGTGGGCTTAAATCTATTACCCGCT  
>HPV103\_Unclassified\_109390382\_nt0581\_Genome\_Tile\_rc|1  
AAATAGTCGTCTTTTACTGCTGGATCCTCGTGGCGACACACAGCGCTTCAAGTCGTGG  
>HPV103\_Unclassified\_109390382\_nt0701\_Genome\_Tile\_rc|1  
TGCACATACAGCATTTTTCATCCCATTAGTCAATGTCCCTGAATTAGTCAATGCCCTCCGA  
>HPV103\_Unclassified\_109390382\_nt0721\_Genome\_Tile\_rc|1  
CGTGTGTCGCCATCCTGCGTTGCACATACAGCATTTTTCATCCCATTAGTCAATGTCCCT  
>HPV103\_Unclassified\_109390382\_nt0741\_Genome\_Tile\_rc|1  
TGTGTAAATATCCAGGCACCGTGTGTCGCCATCCTGCGTTGCACATACAGCATTTTTCAT  
>HPV103\_Unclassified\_109390382\_nt0861\_Genome\_Tile\_rc|1

TTGCTGCTACCCAGCTATGACAACATGACTTATTACTTTGAAATGGCCTGGTTATTTTCCT  
>HPV103\_Unclassified\_109390382\_nt0881\_Genome\_Tile\_rc|1  
TTCTGCTACAACACCAAATATTGCTGCTACCCAGCTATGACAACATGACTTATTACTTTG  
>HPV103\_Unclassified\_109390382\_nt0901\_Genome\_Tile\_rc|1  
GTCTTAGCCGCTTCCAACATTTCTGCTACAACACCAAATATTGCTGCTACCCAGCTATGA  
>HPV103\_Unclassified\_109390382\_nt0921\_Genome\_Tile\_rc|1  
CACAATGCACTTTAAATAGCGTCTTAGCCGCTTCCAACATTTCTGCTACAACACCAAATA  
>HPV103\_Unclassified\_109390382\_nt0941\_Genome\_Tile\_rc|1  
ATTAATAATTTGTAAATAATCACAATGCACTTTAAATAGCGTCTTAGCCGCTTCCAACAT  
>HPV103\_Unclassified\_109390382\_nt0961\_Genome\_Tile\_rc|1  
ACTCCTGTACCCATACTAGGATTAATAATTTGTAAATAATCACAATGCACTTTAAATAGC  
>HPV103\_Unclassified\_109390382\_nt0981\_Genome\_Tile\_rc|1  
CAAACAAGCATAATACAGTAACTCCTGTACCCATACTAGGATTAATAATTTGTAAATAAT  
>HPV103\_Unclassified\_109390382\_nt1001\_Genome\_Tile\_rc|1  
ACATTTAGAACTTGAAAACCTCAAACAAGCATAATACAGTAACTCCTGTACCCATACTAGG  
>HPV103\_Unclassified\_109390382\_nt1021\_Genome\_Tile\_rc|1  
AGTTTTTGTACAGTATCTCTACATTTAGAACTTGAAAACCTCAAACAAGCATAATACAGTA  
>HPV103\_Unclassified\_109390382\_nt1041\_Genome\_Tile\_rc|1  
CGTTTAGCACATTGCTAATCAGTTTTTGTACAGTATCTCTACATTTAGAACTTGAAAACCT  
>HPV103\_Unclassified\_109390382\_nt1061\_Genome\_Tile\_rc|1  
TATTATTTGATGTTCCCTGCACGTTTAGCACATTGCTAATCAGTTTTTGTACAGTATCTCT  
>HPV103\_Unclassified\_109390382\_nt1101\_Genome\_Tile\_rc|1  
ACAATGCTACTGGTACACTTCTATGTGCGGAGGATCTGTTATTATTTGATGTTCCCTGCA  
>HPV103\_Unclassified\_109390382\_nt1141\_Genome\_Tile\_rc|1  
TGTACAAAACCTTGTATTAGACATGCTTTGTTTATAAAAAACAATGCTACTGGTACACTT  
>HPV103\_Unclassified\_109390382\_nt1221\_Genome\_Tile\_rc|1  
TATGAGACAGTTCAAATGAGTCTGCCTCCTGCTGGTGGTTTAGCATAGTTTGTCTTTTAA  
>HPV103\_Unclassified\_109390382\_nt1341\_Genome\_Tile\_rc|1  
TATATTGCTGGTTGCTTTTTTAGCCATGCTGCTGCATTTGGTTCCACATCTGCTAAACATG  
>HPV103\_Unclassified\_109390382\_nt1381\_Genome\_Tile\_rc|1  
TTGTACATTCTAACCATTTTTTGACAATCTGACACATACTTATATTGCTGGTTGCTTTTT  
>HPV103\_Unclassified\_109390382\_nt1401\_Genome\_Tile\_rc|1  
TTTGTTCGATTTTCATACTTTTTGTACATTCTAACCATTTTTTGACAATCTGACACATACT  
>HPV103\_Unclassified\_109390382\_nt1441\_Genome\_Tile\_rc|1  
ATATGCTCTCCACATTTTTTTTATCCACTGTGCCATACTCATTGTTCGATTTTCATACTTT  
>HPV103\_Unclassified\_109390382\_nt1481\_Genome\_Tile\_rc|1  
TAATAGGTTTATAATTTTTTTTCCAGTCTCCGTCTGTTTCTATATGCTCTCCACATTTTTTT  
>HPV103\_Unclassified\_109390382\_nt1521\_Genome\_Tile\_rc|1  
AACTTGTTAAAAATGCTATTACTGATATTTCTGATATTTTAAATAGGTTTATAATTTTTTT  
>HPV103\_Unclassified\_109390382\_nt1541\_Genome\_Tile\_rc|1  
TCCCTTTAAAAACATTCTAAACTTGTTAAAAATGCTATTACTGATATTTCTCTGATATTT  
>HPV103\_Unclassified\_109390382\_nt1581\_Genome\_Tile\_rc|1  
CTGGAGGTCCCCATAGTGCTATACAGTTTTTCTTTGGTTGTCCCTTTAAAAACATTCTAA  
>HPV103\_Unclassified\_109390382\_nt1761\_Genome\_Tile\_rc|1  
AAGCACTTCTCATATACACATCCATAAATTGGAAACATGGAAATGTAGCATCGTCTATAA  
>HPV103\_Unclassified\_109390382\_nt1781\_Genome\_Tile\_rc|1  
AGACACCTCGTTTCCATCTAAAGCACTTCTCATATACACATCCATAAATTGGAAACATGG  
>HPV103\_Unclassified\_109390382\_nt1821\_Genome\_Tile\_rc|1  
GTAATTTAATTTGCACCTGGTACCCTATGCTTACAATCCACAGACACCTCGTTTCCATCTA  
>HPV103\_Unclassified\_109390382\_nt1881\_Genome\_Tile\_rc|1  
GCAGGTATTTTAAAGAGGCCTCCGAATGCATATCTATGTTGGAGGTAACAAGTAATGGAG  
>HPV103\_Unclassified\_109390382\_nt1901\_Genome\_Tile\_rc|1  
AAAACCTTGTAATTCTACTCTGCAGGTATTTTAAAGAGGCCTCCGAATGCATATCTATGTT  
>HPV103\_Unclassified\_109390382\_nt1921\_Genome\_Tile\_rc|1  
GGAAGTTTATGTGGAACTTAAACTTGTAATTCTACTCTGCAGGTATTTTAAAGAGGCC

>HPV103\_Unclassified\_109390382\_nt2041\_Genome\_Tile\_rc|1  
GGGTCTCCATTTGTACTGTCTTCTGGGTCAAAAGGTCTAACTGCTGCTCCAGCTTGCTA  
>HPV103\_Unclassified\_109390382\_nt2121\_Genome\_Tile\_rc|1  
TATTTGGGATTCCAGGTCTGAGCGTCCGGCCTCATAAAGCCCCAGTAGTTTCTCTTGAC  
>HPV103\_Unclassified\_109390382\_nt2141\_Genome\_Tile\_rc|1  
CTTACAAGATCCCAGTGTTGTATTTGGGATTCCAGGTCTGAGCGTCCGGCCTCATAAAGC  
>HPV103\_Unclassified\_109390382\_nt2161\_Genome\_Tile\_rc|1  
TTAGCAGTACATGCTCCTGCCTTACAAGATCCCAGTGTTGTATTTGGGATTCCAGGTCTG  
>HPV103\_Unclassified\_109390382\_nt2221\_Genome\_Tile\_rc|1  
CTGCCAATGGGGGCACTTTTTGTAGGCCCAATGTTTGTATGCCCTGCCTTCTGGCATAGT  
>HPV103\_Unclassified\_109390382\_nt2261\_Genome\_Tile\_rc|1  
AACTGCATCATAATAGCAGTTTTGGCTTTGCTTTCAGATGCTGCCAATGGGGGCACTTTT  
>HPV103\_Unclassified\_109390382\_nt2321\_Genome\_Tile\_rc|1  
GTATCTGTAAATGTCCATGGTTCCTGCCCATATTGGGATTTCTTTAGGCTTTTCAGCACC  
>HPV103\_Unclassified\_109390382\_nt2341\_Genome\_Tile\_rc|1  
TGGTAAATAGTTCATGGCTTGTATCTGTTAATGTCCATGGTTCCTGCCCATATTGGGATT  
>HPV103\_Unclassified\_109390382\_nt2421\_Genome\_Tile\_rc|1  
TGGCATAGCTTTTTCTTCCTCGTTGTCAAATAACACTTCCACAGTTACACCTCCTTTTTT  
>HPV103\_Unclassified\_109390382\_nt2441\_Genome\_Tile\_rc|1  
ATTAGTCTCCATAGTGTATATGGCATAGCTTTTTCTTCCTCGTTGTCAAATAACACTTCC  
>HPV103\_Unclassified\_109390382\_nt2481\_Genome\_Tile\_rc|1  
ATGTGTTTTATGCCACAGCTCATCTGCATCTTGATAATATATTAGTCTCCATAGTGTATA  
>HPV103\_Unclassified\_109390382\_nt2521\_Genome\_Tile\_rc|1  
CCATGTCTATAAAGTACAGGCCATCCGCGTCTACCTGTCCATGTGTTTTATGCCACAGCT  
>HPV103\_Unclassified\_109390382\_nt2541\_Genome\_Tile\_rc|1  
ATAATAGTGTTTTTGCTTTTACCATGTCTATAAAGTACAGGCCATCCGCGTCTACCTGTCC  
>HPV103\_Unclassified\_109390382\_nt2561\_Genome\_Tile\_rc|1  
GCTTCCTTGGTAAAATGCACATAATAGTGTTTTTGCTTTTACCATGTCTATAAAGTACAGG  
>HPV103\_Unclassified\_109390382\_nt2581\_Genome\_Tile\_rc|1  
CTTTTTGTCCATATTTTACTGCTTCCTTGGTAAAATGCACATAATAGTGTTTTTGCTTTA  
>HPV103\_Unclassified\_109390382\_nt2601\_Genome\_Tile\_rc|1  
AGTCCTCACTTGCCACATCCCTTTTTGTCCATATTTTACTGCTTCCTTGGTAAAATGCAC  
>HPV103\_Unclassified\_109390382\_nt2621\_Genome\_Tile\_rc|1  
CCAAATAATACATCAGTTCAGTCCTCACTTGCCACATCCCTTTTTGTCCATATTTTACT  
>HPV103\_Unclassified\_109390382\_nt2701\_Genome\_Tile\_rc|1  
CTTTTCTGGCGCTTCGGGTGACTTGTGCGGTGGTGTACCTTGCTCGGCCCCCGTCAAG  
>HPV103\_Unclassified\_109390382\_nt2721\_Genome\_Tile\_rc|1  
GGAATGTCTTCGTGCTTTGCCTTTTCTGGCGCTTCGGGTGACTTGTGCGGTGGTGTACCC  
>HPV103\_Unclassified\_109390382\_nt2761\_Genome\_Tile\_rc|1  
TCTCTGTGGTCGTCGAGGTGGTCGAGGGGGTTGCCTTCTGGAATGTCTTCGTGCTTTGC  
>HPV103\_Unclassified\_109390382\_nt2781\_Genome\_Tile\_rc|1  
AGCCGAATCCTCTGAGTCGGTCTCTGTGGTCGTCGAGGTGGTCGAGGGGGTTGCCTTCT  
>HPV103\_Unclassified\_109390382\_nt2921\_Genome\_Tile\_rc|1  
GACGGATAGTTTCTATCAGGGCTTCGATGTCGCGATCCCACTGCTGCAGCAGTGTACAGTA  
>HPV103\_Unclassified\_109390382\_nt2941\_Genome\_Tile\_rc|1  
CTTGTAGCCTTGCAAGTCTTGACGGATAGTTTCTATCAGGGCTTCGATGTCGCGATCCCA  
>HPV103\_Unclassified\_109390382\_nt3021\_Genome\_Tile\_rc|1  
TATTCTACACCTGTACCTCCAACATTTCAATGTATTTGAAGGCCCTTTAACTAATAATAT  
>HPV103\_Unclassified\_109390382\_nt3041\_Genome\_Tile\_rc|1  
TGAAATAAGCCTCTATATTTTATTCTACACCTGTACCTCCAACATTTCAATGTATTTGAA  
>HPV103\_Unclassified\_109390382\_nt3061\_Genome\_Tile\_rc|1  
TAAAGCTGTGCTAATACACTGAAATAAGCCTCTATATTTTATTCTACACCTGTACCTCC  
>HPV103\_Unclassified\_109390382\_nt3081\_Genome\_Tile\_rc|1  
ACCCGCATCCGCCACCCATGTAAAAGCTGTGCTAATACACTGAAATAAGCCTCTATATTT  
>HPV103\_Unclassified\_109390382\_nt3101\_Genome\_Tile\_rc|1

CTAGCATTTCTTAATTGTGGACCCGCATCCGCCACCCATGTAAAAGCTGTGCTAATACAC  
>HPV103\_Unclassified\_109390382\_nt3141\_Genome\_Tile\_rc|1  
CTTTTCCCTTTGTGATGTATTAGTAAATCCTACTATTATTCTAGCATTTCTTAATTGTGG  
>HPV103\_Unclassified\_109390382\_nt3201\_Genome\_Tile\_rc|1  
TGAATCAAGGTTTCCTAATGCACTACTTGTGCCTTTAGGTAATTTACAGTTTGTATAAA  
>HPV103\_Unclassified\_109390382\_nt3241\_Genome\_Tile\_rc|1  
TAATATACAGGGGACCATTGGCAGCATTATTGGCTTAAAATGAATCAAGGTTTCCTAATG  
>HPV103\_Unclassified\_109390382\_nt3261\_Genome\_Tile\_rc|1  
TACCTATGTAAGGGTTAGGATAATATACAGGGGACCATTGGCAGCATTATTGGCTTAAAA  
>HPV103\_Unclassified\_109390382\_nt3301\_Genome\_Tile\_rc|1  
CCATGTAAGCTATTTACAACATATATAGTACATACACTTATACCTATGTAAGGGTTAGGA  
>HPV103\_Unclassified\_109390382\_nt3321\_Genome\_Tile\_rc|1  
TCGCTTTTTCGGTTGTACATCCATGTAAGCTATTTACAACATATATAGTACATACACTTA  
>HPV103\_Unclassified\_109390382\_nt3361\_Genome\_Tile\_rc|1  
CACAATGTTTATATATATTTTCCACAGTATCCCGTTTTTGTCTGCTTTTTCGGTTGTACAT  
>HPV103\_Unclassified\_109390382\_nt3381\_Genome\_Tile\_rc|1  
AGGACATGTGCCTGACCCTGCACAATGTTTATATATATTTTCCACAGTATCCCGTTTTTG  
>HPV103\_Unclassified\_109390382\_nt3441\_Genome\_Tile\_rc|1  
AATCCATTTTAACAGTTTGTCTGCTAATGTTGTTGCTCTACTTTATTTTAAACATCCTC  
>HPV103\_Unclassified\_109390382\_nt3461\_Genome\_Tile\_rc|1  
CCAAAGTAAACCACACTGGCAATCCATTTTAACAGTTTGTCTGCTAATGTTGTTGCTCT  
>HPV103\_Unclassified\_109390382\_nt3561\_Genome\_Tile\_rc|1  
ACCCTGTGATGTTACCCGACCCCACTGCAGACCCCGACCCAATGGGAACATAGCCAGA  
>HPV103\_Unclassified\_109390382\_nt3621\_Genome\_Tile\_rc|1  
TATAGGAACATATACAGGAGGCCCAATAGGATCTACCACAACACCCGGACGTACTACAGT  
>HPV103\_Unclassified\_109390382\_nt3641\_Genome\_Tile\_rc|1  
GACTGTGGTGTAAGTGCATCTATAGGAACATATCAGGAGGCCCAATAGGATCTACCACA  
>HPV103\_Unclassified\_109390382\_nt3661\_Genome\_Tile\_rc|1  
CTAATGGTACCACAGAGGAGGACTGTGGTGTAAGTGCATCTATAGGAACATATCAGGAG  
>HPV103\_Unclassified\_109390382\_nt3681\_Genome\_Tile\_rc|1  
AACAATCTCAGGTATTACCTCTAATGGTACCACAGAGGAGGACTGTGGTGTAAGTGCATC  
>HPV103\_Unclassified\_109390382\_nt3701\_Genome\_Tile\_rc|1  
TCAGGGGGCGTAGGGTCGCCAACAATCTCAGGTATTACCTCTAATGGTACCACAGAGGAG  
>HPV103\_Unclassified\_109390382\_nt3721\_Genome\_Tile\_rc|1  
TAATATTAGGAGTAGATATATCAGGGGGCGTAGGGTCGCCAACAATCTCAGGTATTACCT  
>HPV103\_Unclassified\_109390382\_nt3741\_Genome\_Tile\_rc|1  
TACAGGATCTGTTACAGTAATAATATTAGGAGTAGATATATCAGGGGGCGTAGGGTCGCC  
>HPV103\_Unclassified\_109390382\_nt3761\_Genome\_Tile\_rc|1  
GTGTCTAGTGTTATGTCAGATACAGGATCTGTTACAGTAATAATATTAGGAGTAGATATA  
>HPV103\_Unclassified\_109390382\_nt3801\_Genome\_Tile\_rc|1  
AGCACTGGTGGGGTCAATAGTAGCAACAGCAGGAGAGGTGGTGTCTAGTGTTATGTCAGA  
>HPV103\_Unclassified\_109390382\_nt3821\_Genome\_Tile\_rc|1  
GTGGGCTGCACCTCCAGTATAGCACTGGTGGGGTCAATAGTAGCAACAGCAGGAGAGGTG  
>HPV103\_Unclassified\_109390382\_nt3861\_Genome\_Tile\_rc|1  
TCTGCTACTGCCTACAGAGACCCTTTTAGGTGTTGATGCAGTGGGCTGCACCTCCAGTAT  
>HPV103\_Unclassified\_109390382\_nt3881\_Genome\_Tile\_rc|1  
ATGTATGATGGCGTAACATGTCTGCTACTGCCTACAGAGACCCTTTTAGGTGTTGATGCA  
>HPV103\_Unclassified\_109390382\_nt3901\_Genome\_Tile\_rc|1  
TAGGATGCCCCATATACAGAGATGTATGATGGCGTAACATGTCTGCTACTGCCTACAGAGA  
>HPV103\_Unclassified\_109390382\_nt3921\_Genome\_Tile\_rc|1  
AGATTGTGTAACAGGGTCTGTAGGATGCCCATATACAGAGATGTATGATGGCGTAACATG  
>HPV103\_Unclassified\_109390382\_nt3981\_Genome\_Tile\_rc|1  
TTCCCCAATATTGACAACAGATCCTTCTGTTACAGCACCCCTATAAACACCTCAGCTGC  
>HPV103\_Unclassified\_109390382\_nt4021\_Genome\_Tile\_rc|1  
CAGACCCCTGTGTTTCCACAAATGTTTCTAATGGTATAGATTCCCCAATATTGACAACAG

>HPV103\_Unclassified\_109390382\_nt4041\_Genome\_Tile\_rc|1  
AGGTTGAATATCAAATGTGGCAGACCCCTGTGTTTCCACAAATGTTTCTAATGGTATAGA  
>HPV103\_Unclassified\_109390382\_nt4061\_Genome\_Tile\_rc|1  
GTACGTGGTGGCTCTGCAGTAGGTTGAATATCAAATGTGGCAGACCCCTGTGTTTCCACA  
>HPV103\_Unclassified\_109390382\_nt4081\_Genome\_Tile\_rc|1  
GAAATGCCCCGAGGGGTACTAGTACGTGGTGGCTCTGCAGTAGGTTGAATATCAAATGTGG  
>HPV103\_Unclassified\_109390382\_nt4121\_Genome\_Tile\_rc|1  
CGCCTATTATATAATTCACGAGCCCTTTTGGAAATGCTCTTTGAAATGCCCCGAGGGGTACTA  
>HPV103\_Unclassified\_109390382\_nt4141\_Genome\_Tile\_rc|1  
TAGTTCTAACTTGTTGAACCCGCCTATTATATAATTCACGAGCCCTTTTGGAAATGCTCTTT  
>HPV103\_Unclassified\_109390382\_nt4161\_Genome\_Tile\_rc|1  
GTTTAGGAAATCTATGTTCCTAGTTCTAACTTGTTGAACCCGCCTATTATATAATTCACG  
>HPV103\_Unclassified\_109390382\_nt4181\_Genome\_Tile\_rc|1  
GTAACCGCTGTCGTGGGCGGTTTAGGAAATCTATGTTCCTAGTTCTAACTTGTTGAACC  
>HPV103\_Unclassified\_109390382\_nt4201\_Genome\_Tile\_rc|1  
CGGGATTTTCAAATTGAAAAGTAACCGCCTGTCGTGGGCGGTTTAGGAAATCTATGTTCC  
>HPV103\_Unclassified\_109390382\_nt4281\_Genome\_Tile\_rc|1  
AGCAAAATCAGGATCTGGTGCAGCAGTAGCTAAGGCATTTAAATCCTGTTCAAATACAAG  
>HPV103\_Unclassified\_109390382\_nt4381\_Genome\_Tile\_rc|1  
CACTTCTGTACGAATAGTGCCACGTTGACCCAACCTGCTTAGTCTAATGTGGCCTTCAG  
>HPV103\_Unclassified\_109390382\_nt4521\_Genome\_Tile\_rc|1  
TGCAACAATAGATTGTGCTGTTGCTGCATCAATAATACCTGTGTCACCGGAATGCTGACC  
>HPV103\_Unclassified\_109390382\_nt4541\_Genome\_Tile\_rc|1  
AAACTAGATTTCAGCTGTGTCTGCAACAATAGATTGTGCTGTTGCTGCATCAATAATACCT  
>HPV103\_Unclassified\_109390382\_nt4601\_Genome\_Tile\_rc|1  
GTTGTAGAATCAAGCAGCTCATTGTCTAGCTGTGGGCCTATTAATGTTTGACCTTCTATA  
>HPV103\_Unclassified\_109390382\_nt4661\_Genome\_Tile\_rc|1  
GGAAACTGGATGCCATGGTGAACCCCTGCAAATCGGAGACGAGAGGAGCTAAAATCCTCG  
>HPV103\_Unclassified\_109390382\_nt4681\_Genome\_Tile\_rc|1  
AAGTAACAATATCTAAAGAGGGAACTGGATGCCATGGTGAACCCCTGCAAATCGGAGAC  
>HPV103\_Unclassified\_109390382\_nt4721\_Genome\_Tile\_rc|1  
GATGCAGTGACAACAAATTGTAATGCAGCACCAGGTGGTAAAGTAACAATATCTAAAGAG  
>HPV103\_Unclassified\_109390382\_nt4761\_Genome\_Tile\_rc|1  
ATATTGTGGAATAATAGTTGTAGTATTATGTTTACCAGCGGATGCAGTGACAACAAATTG  
>HPV103\_Unclassified\_109390382\_nt4781\_Genome\_Tile\_rc|1  
ATAAAAGGTGTAGTGGGGATATATTGTGGAATAATAGTTGTAGTATTATGTTTACCAGCG  
>HPV103\_Unclassified\_109390382\_nt4801\_Genome\_Tile\_rc|1  
AATCTACTACCACAGAAGGAATAAAAGGTGTAGTGGGGATATATTGTGGAATAATAGTTG  
>HPV103\_Unclassified\_109390382\_nt5021\_Genome\_Tile\_rc|1  
CAGTAAGCAGGCGGTCTGCTGGAGGCATGGAAGAAAATAGACGTTTCCACAACGTATTCAT  
>HPV103\_Unclassified\_109390382\_nt5081\_Genome\_Tile\_rc|1  
CCTTAGGTACAACAATTGTACCTTCACCCACTTTTGTAAATTGGAAAATATGGGTGTCCTA  
>HPV103\_Unclassified\_109390382\_nt5101\_Genome\_Tile\_rc|1  
CCTGAATTGATTACCAGATACCTTAGGTACAACAATTGTACCTTCACCCACTTTTGTAAAT  
>HPV103\_Unclassified\_109390382\_nt5121\_Genome\_Tile\_rc|1  
GGTAAAAGGATGTGAAAGGCCCTGAATTGATTACCAGATACCTTAGGTACAACAATTGTA  
>HPV103\_Unclassified\_109390382\_nt5141\_Genome\_Tile\_rc|1  
GTGCCAACTTGTTAGGATCAGGTAAAAGGATGTGAAAGGCCCTGAATTGATTACCAGATA  
>HPV103\_Unclassified\_109390382\_nt5161\_Genome\_Tile\_rc|1  
ATATATATTGGAATCCACAAGTGCCAACCTGTTAGGATCAGGTAAAAGGATGTGAAAGGC  
>HPV103\_Unclassified\_109390382\_nt5181\_Genome\_Tile\_rc|1  
AGCCGTTCTGACTCGGCATTATATATATTGGAATCCACAAGTGCCAACCTGTTAGGATCA  
>HPV103\_Unclassified\_109390382\_nt5201\_Genome\_Tile\_rc|1  
GACCCCGTAACTTCCAAACAAGCCGTTCTGACTCGGCATTATATATATTGGAATCCACAA  
>HPV103\_Unclassified\_109390382\_nt5221\_Genome\_Tile\_rc|1

TCCACCACGACCAATATCCAGACCCCGTAACTTCCAAACAAGCCGTTCTGACTCGGCATT  
>HPV103\_Unclassified\_109390382\_nt5241\_Genome\_Tile\_rc|1  
GAAGAGCCAACGCTAAGGGGTCCACCACGACCAATATCCAGACCCCGTAACTTCCAAACA  
>HPV103\_Unclassified\_109390382\_nt5261\_Genome\_Tile\_rc|1  
TATTAAATAAAGGTGTCCAGAAGAGCCAACGCTAAGGGGTCCACCACGACCAATATCCA  
>HPV103\_Unclassified\_109390382\_nt5301\_Genome\_Tile\_rc|1  
GTTTTAACATAACTATTAGGATTTTCAGTATCCTTAAGTTTATTAAATAAAGGTGTCCA  
>HPV103\_Unclassified\_109390382\_nt5321\_Genome\_Tile\_rc|1  
TTTGTCTGTTTTCTTTCTGTTTTAACATAACTATTAGGATTTTCAGTATCCTTAAGTT  
>HPV103\_Unclassified\_109390382\_nt5341\_Genome\_Tile\_rc|1  
CTTTGGGTCCATAGAGACACTTTGTCTGTTTCCTTTCTGTTTTAACATAACTATTAGG  
>HPV103\_Unclassified\_109390382\_nt5361\_Genome\_Tile\_rc|1  
ACTACAAATAGCTGAGTTTGCTTTGGGTCCATAGAGACACTTTGTCTGTTTTCTTTCT  
>HPV103\_Unclassified\_109390382\_nt5561\_Genome\_Tile\_rc|1  
CTACAATGTCCAAGGTACACCTGAATGGTCCTCCTGCAATGTAGCAAAATTCATTGCAC  
>HPV103\_Unclassified\_109390382\_nt5581\_Genome\_Tile\_rc|1  
AGGCCATTTACATTTAGAAGCTACAATGTCCAAGGGTACACCTGAATGGTCCTCCTGCAA  
>HPV103\_Unclassified\_109390382\_nt5641\_Genome\_Tile\_rc|1  
ACGTCTTCCAAAGAAAAACATTTGATTGCCATATGTGTCATTTGCCATTCTAAGAAAATC  
>HPV103\_Unclassified\_109390382\_nt5661\_Genome\_Tile\_rc|1  
TGGCGAGCATACAACCTGCTCACGTCTTCCAAAGAAAAACATTTGATTGCCATATGTGTCA  
>HPV103\_Unclassified\_109390382\_nt5721\_Genome\_Tile\_rc|1  
ACACCCTCAAATTCAGCCTCAGGTATACTGTCGCCCATGACACCATCCCTAGCAAAAAAG  
>HPV103\_Unclassified\_109390382\_nt5741\_Genome\_Tile\_rc|1  
GTAAAATATAGGTGTGCTTAACACCCTCAAATTCAGCCTCAGGTATACTGTCGCCCATGA  
>HPV103\_Unclassified\_109390382\_nt5781\_Genome\_Tile\_rc|1  
GACGAGGAGGCTGTATTTTGGTCTTTGTCTAGACGCCCCCTGTAAAATATAGGTGTGCTTA  
>HPV103\_Unclassified\_109390382\_nt5821\_Genome\_Tile\_rc|1  
ACTAGAAACAGTGATCCACTGGGGGTTGCATAGTAAACAGACGAGGAGGCTGTATTTTG  
>HPV103\_Unclassified\_109390382\_nt5841\_Genome\_Tile\_rc|1  
CTGCCAAACAACTGAGAATCACTAGAAACAGTGATCCACTGGGGGTTGCATAGTAAACA  
>HPV103\_Unclassified\_109390382\_nt5901\_Genome\_Tile\_rc|1  
AAATTATTTCTCCAACACACACTATTATTAGGGCCCTGAGCCTTTTGTATCCAGTATGGT  
>HPV103\_Unclassified\_109390382\_nt5961\_Genome\_Tile\_rc|1  
TCTGACTTAACATTTATTGTAAATTTACATTGTGTGTGTTATCAACCAATGTAATAAAT  
>HPV103\_Unclassified\_109390382\_nt6061\_Genome\_Tile\_rc|1  
AACCTTGCAATAATTGCAATATAAGAGCAATCTCAAATTCCTCTACATGTGCGAGATAATG  
>HPV103\_Unclassified\_109390382\_nt6081\_Genome\_Tile\_rc|1  
AATACATCAGCTGTGAGAGGAACCTTGCATAATTGCAATATAAGAGCAATCTCAAATTCC  
>HPV103\_Unclassified\_109390382\_nt6101\_Genome\_Tile\_rc|1  
CCATTACATGTATATGGGCTAATACATCAGCTGTGAGAGGAACCTTGCATAATTGCAATA  
>HPV103\_Unclassified\_109390382\_nt6121\_Genome\_Tile\_rc|1  
GTCCTCAATTATAGCTGGATCCATTACATGTATATGGGCTAATACATCAGCTGTGAGAGG  
>HPV103\_Unclassified\_109390382\_nt6141\_Genome\_Tile\_rc|1  
GGTACAAACCTAGCTGCCAGTCCTCAATTATAGCTGGATCCATTACATGTATATGGGCT  
>HPV103\_Unclassified\_109390382\_nt6161\_Genome\_Tile\_rc|1  
CAATAGAAGAAGGAGGCGGTGGTACAAACCTAGCTGCCAGTCCTCAATTATAGCTGGAT  
>HPV103\_Unclassified\_109390382\_nt6181\_Genome\_Tile\_rc|1  
TAAAAATCTGTATGTATCTCCAATAGAAGAAGGAGGCGGTGGTACAAACCTAGCTGCCA  
>HPV103\_Unclassified\_109390382\_nt6201\_Genome\_Tile\_rc|1  
CAGCGTGTGGCTAAAGATGTTAAAAATCTGTATGTATCTCCAATAGAAGAAGGAGGCGGT  
>HPV103\_Unclassified\_109390382\_nt6241\_Genome\_Tile\_rc|1  
ATATGGGTCTGTTTTTCTTTGGGAGGTTCTGCAGCAGGGCAGCGTGTGGCTAAAGATGT  
>HPV103\_Unclassified\_109390382\_nt6341\_Genome\_Tile\_rc|1  
TAACCCCAGTTTGAGATAAAAAATCTGCGACCCAAAGGATATCTGTCAAGATCAGAGGACA



>HPV103\_Unclassified\_109390382\_nt6361\_Genome\_Tile\_rc|1  
AGAGGAGGTAGAAGACGAGCTAACCCAGTTTGAGATAAAAAATCTGCGACCCAAAGGATA  
>HPV103\_Unclassified\_109390382\_nt6401\_Genome\_Tile\_rc|1  
GTACTGGGCGGGTAGGGGTCTCTACACGAGACCGCTTTCTAGAGGAGGTAGAAGACGAGC  
>HPV103\_Unclassified\_109390382\_nt6421\_Genome\_Tile\_rc|1  
TCTACGTTTTTTTAGCAGACCGTACTGGGCGGGTAGGGGTCTCTACACGAGACCGCTTTCT  
>HPV103\_Unclassified\_109390382\_nt6481\_Genome\_Tile\_rc|1  
CAAGAACAAAAATATAAAGTGCATGTGCAACACAGGTAATGCCATAGATTAAACCCCCCG  
>HPV103\_Unclassified\_109390382\_nt6501\_Genome\_Tile\_rc|1  
ACACAGTACTGCAGTTGATACAAGAACAAAAATATAAAGTGCATGTGCAACACAGGTAAT  
>HPV103\_Unclassified\_109390382\_nt6521\_Genome\_Tile\_rc|1  
GGAATGTACAAGACAAGTTAACACAGTACTGCAGTTGATACAAGAACAAAAATATAAAGT  
>HPV103\_Unclassified\_109390382\_nt6541\_Genome\_Tile\_rc|1  
TTAAATGTAATATAAGTTAAGGAATGTACAAGACAAGTTAACACAGTACTGCAGTTGATA  
>HPV103\_Unclassified\_109390382\_nt6561\_Genome\_Tile\_rc|1  
GACAAATATATTTAATACCCTTAAATGTAATATAAGTTAAGGAATGTACAAGACAAGTTA  
>HPV103\_Unclassified\_109390382\_nt6601\_Genome\_Tile\_rc|1  
TACATGACTCAATAACAAATCACGCAGAGACCGGTACCATGACAAATATATTTAATACCC  
>HPV103\_Unclassified\_109390382\_nt6681\_Genome\_Tile\_rc|1  
AAAAAACAGTGTGTATAGCCCCTGCACGTCCAAGCCGACGGAAGCCAAAGACTAAAAG  
>HPV103\_Unclassified\_109390382\_nt6701\_Genome\_Tile\_rc|1  
GCTTTATTAAAGAAGTATCCAAAAAACAGTGTGTATAGCCCCTGCACGTCCAAGCCGGA  
>HPV103\_Unclassified\_109390382\_nt6721\_Genome\_Tile\_rc|1  
ATCGGTTTCACTGAAAGAAAGCTTTATTAAAGAAGTATCCAAAAAACAGTGTGTATAGC  
>HPV103\_Unclassified\_109390382\_nt6741\_Genome\_Tile\_rc|1  
CAACGGAGTTGGCGACCGTTATCGGTTTCACTGAAAGAAAGCTTTATTAAAGAAGTATCC  
>HPV103\_Unclassified\_109390382\_nt6761\_Genome\_Tile\_rc|1  
AGTACATACCTGAAAGTTGGCAACGGAGTTGGCGACCGTTATCGGTTTCACTGAAAGAAA  
>HPV103\_Unclassified\_109390382\_nt6821\_Genome\_Tile\_rc|1  
CGGCCAGATAACTAATTCGGTTGCTGGAAGGCTGAGTAATCTTGTTGTTGAACTTGCAA  
>HPV103\_Unclassified\_109390382\_nt6841\_Genome\_Tile\_rc|1  
TCGCTGCCGGTCGTGGCCAACGGCCAGATAACTAATTCGGTTGCTGGAAGGCTGAGTAAT  
>HPV103\_Unclassified\_109390382\_nt6861\_Genome\_Tile\_rc|1  
ATCAAGAATATTACAAAACATCGCTGCCGGTCGTGGCCAACGGCCAGATAACTAATTCGG  
>HPV103\_Unclassified\_109390382\_nt6941\_Genome\_Tile\_rc|1  
CTTCTACTTTATATAGTATACACCTCTCCCGTTAGTAAAGCAAACGGAATAGGTGGTAG  
>HPV103\_Unclassified\_109390382\_nt6961\_Genome\_Tile\_rc|1  
AAGAGAACTGCCCAATACAGCTTCTACTTTATATAGTATACACCTCTCCCGTTAGTAAA  
>HPV103\_Unclassified\_109390382\_nt6981\_Genome\_Tile\_rc|1  
ACAGGGGTACAACCACGCAAAAGAGAACTGCCCAATACAGCTTCTACTTTATATAGTATA  
>HPV103\_Unclassified\_109390382\_nt7001\_Genome\_Tile\_rc|1  
AGCCCACCAACCATCCACCACACAGGGGTACAACCACGCAAAAGAGAACTGCCCAATACAG  
>HPV103\_Unclassified\_109390382\_nt7041\_Genome\_Tile\_rc|1  
CCATACAAATAACAAGAATGGAACAATATTCATTTCCAGAGCCCACCAACCATCCACCAC  
>HPV103\_Unclassified\_109390382\_nt7061\_Genome\_Tile\_rc|1  
GCACAGCATAAATACAATTGCCATACAAATAACAAGAATGGAACAATATTCATTTCCAG  
>HPV103\_Unclassified\_109390382\_nt7081\_Genome\_Tile\_rc|1  
ATATTACAGTTAAACAAACGCACAGCATAAATACAATTGCCATACAAATAACAAGAATG  
>HPV103\_Unclassified\_109390382\_nt7161\_Genome\_Tile\_rc|1  
ACATACAACAAGTACTGGCCAAATCCCGCATATATATAGTTACACTCTAATAGCTAAACA  
>HPV103\_Unclassified\_109390382\_nt7181\_Genome\_Tile\_rc|1  
ACACACCTTTTATACACTATACATACAACAAGTACTGGCCAAATCCCGCATATATATAGT  
>HPV96\_Beta\_50253426\_nt0041\_Genome\_Tile\_rc|1  
CAGATACTGCATCACCTCAGGATATTTTATAGCTTATACCGGGTGCGGTTAGCATGTTTA  
>HPV96\_Beta\_50253426\_nt0061\_Genome\_Tile\_rc|1

CCAGGAGTGACTGCCAGGATCAGATACTGCATCACCTCAGGATATTTTATAGCTTATACC  
>HPV96\_Beta\_50253426\_nt0081\_Genome\_Tile\_rc|1  
GCCACTGGATCGGTGTTGTTCCAGGAGTGACTGCCAGGATCAGATACTGCATCACCTCAG  
>HPV96\_Beta\_50253426\_nt0201\_Genome\_Tile\_rc|1  
AACCTCTCAAGATAAAACTTTTTGGCAACCGAGAGAGTTGCGAAACTTACCGTTAACGGTT  
>HPV96\_Beta\_50253426\_nt0241\_Genome\_Tile\_rc|1  
GCGGTTACTTGTATGAGTGGCAGGTTGTAATTGCCAACAACTCTCAAGATAAAACTT  
>HPV96\_Beta\_50253426\_nt0301\_Genome\_Tile\_rc|1  
TCCATCTCAACAATGAACAGAGATCTGTATGTCTGTATATAAAATGTCCTAGAAACGCAG  
>HPV96\_Beta\_50253426\_nt0341\_Genome\_Tile\_rc|1  
AATGCCCAAATGACTTCTAAGTTGCTGCACTGTCTTTAAATCCATCTCAACAATGAACAG  
>HPV96\_Beta\_50253426\_nt0361\_Genome\_Tile\_rc|1  
AACACAGGTCTTCAGTAGGAATGCCCAAATGACTTCTAAGTTGCTGCACTGTCTTTAAA  
>HPV96\_Beta\_50253426\_nt0381\_Genome\_Tile\_rc|1  
TCTTACAGAAGTTACAGGCTAACACAGGTCTTCAGTAGGAATGCCCAAATGACTTCTAA  
>HPV96\_Beta\_50253426\_nt0401\_Genome\_Tile\_rc|1  
CTCCTCAAAGGTTAAAAATTTCTTACAGAAGTTACAGGCTAACACAGGTCTTCAGTAGG  
>HPV96\_Beta\_50253426\_nt0421\_Genome\_Tile\_rc|1  
TTGCTATCAAATCCTAATAGCTCCTCAAAGGTTAAAAATTTCTTACAGAAGTTACAGGCT  
>HPV96\_Beta\_50253426\_nt0441\_Genome\_Tile\_rc|1  
TCCAAATAAGATTTAAAGTCTTGCTATCAAATCCTAATAGCTCCTCAAAGGTTAAAAATT  
>HPV96\_Beta\_50253426\_nt0461\_Genome\_Tile\_rc|1  
CGCATATGCATAACCTTCCTTCCAAATAAGATTTAAAGTCTTGCTATCAAATCCTAATAG  
>HPV96\_Beta\_50253426\_nt0481\_Genome\_Tile\_rc|1  
CTAGCACAAATTGAAACAACACGCATATGCATAACCTTCCTTCCAAATAAGATTTAAAGTC  
>HPV96\_Beta\_50253426\_nt0501\_Genome\_Tile\_rc|1  
ATTCTACTTTGGCTACTGTTCTAGCACAAATTGAAACAACACGCATATGCATAACCTTCCT  
>HPV96\_Beta\_50253426\_nt0561\_Genome\_Tile\_rc|1  
AACTGCCACTGCGAGATTCTATTTCTCGTCCCTTGACTGTTTTTTCATAAAAAATGTTCAA  
>HPV96\_Beta\_50253426\_nt0601\_Genome\_Tile\_rc|1  
CGCAAACAAAAGTGGCATCTAACACAATAACAACAAAGTAAACTGCCACTGCGAGATTCT  
>HPV96\_Beta\_50253426\_nt0661\_Genome\_Tile\_rc|1  
ACTAAATAAAAAGTTTTCTTGATACCCACAAATATTTAACTTTTCTAAATAATCTAACAGT  
>HPV96\_Beta\_50253426\_nt0841\_Genome\_Tile\_rc|1  
CACCTCTGCTACTGTAGATTCTGACAGGTTTCTGACTGCTCTTCTGTCAACTCTTCGTC  
>HPV96\_Beta\_50253426\_nt0861\_Genome\_Tile\_rc|1  
TACAGAGTTCTCTGAGGCTCCACCTCTGCTACTGTAGATTCTGACAGGTTTTCTGACTGC  
>HPV96\_Beta\_50253426\_nt0921\_Genome\_Tile\_rc|1  
GTAGCAGAAACGTAGATTTTTCAGCCGGGAATCACAGCCTCCACACGGTACTACAATCTTG  
>HPV96\_Beta\_50253426\_nt1181\_Genome\_Tile\_rc|1  
ATCTCGGGAAATTCCTGCTCATTCGCATTATCAACAGCATCCCCATCATCAATTAAATC  
>HPV96\_Beta\_50253426\_nt1341\_Genome\_Tile\_rc|1  
CCTGTTCCATAAATAGCCGCTTTTTACATTTGTGTTGCGGCGACAAAGGTATTGCTTCCA  
>HPV96\_Beta\_50253426\_nt1361\_Genome\_Tile\_rc|1  
TGATAACTCAAGCCCGCTGTCCTGTTCCATAAATAGCCGCTTTTTACATTTGTGTTGCGG  
>HPV96\_Beta\_50253426\_nt1441\_Genome\_Tile\_rc|1  
TGAACCTCTGTCCGTGCTGTGCCGTACAGTATTTGGGGGTACCTCCACCTCCGGAGCAGTA  
>HPV96\_Beta\_50253426\_nt1481\_Genome\_Tile\_rc|1  
ACTGCATTTTAACAATAGTCTATAATGCTCATTGCTCGCCTGAACCTTCTGTCCGTGCTGT  
>HPV96\_Beta\_50253426\_nt1501\_Genome\_Tile\_rc|1  
AGCATTGTAGCTCTGAGATTACTGCATTTTAACAATAGTCTATAATGCTCATTGCTCGCC  
>HPV96\_Beta\_50253426\_nt1541\_Genome\_Tile\_rc|1  
TTCCATAAACCACCCCAAAGCTGTTTTTAAATTTGCTGAGCATTGTAGCTCTGAGATT  
>HPV96\_Beta\_50253426\_nt1561\_Genome\_Tile\_rc|1  
CTATTAAATTTCTACACAGTTCCATAAACCACCCCAAAGCTGTTTTTAAATTTGCTG

>HPV96\_Beta\_50253426\_nt1581\_Genome\_Tile\_rc|1  
CCCCACAACAAGTCTTATTGCTATTAAATTTCCCTACACAGTTCCATAAACCCCAACCCCAA  
>HPV96\_Beta\_50253426\_nt1601\_Genome\_Tile\_rc|1  
ATATGCAGTTACGACCCAGTCCCGACAACAAGTCTTATTGCTATTAAATTTCCCTACACAG  
>HPV96\_Beta\_50253426\_nt1681\_Genome\_Tile\_rc|1  
CATAGTGTATGAAGCCATATATAACCACAATGTTCTTGTAACAGTTGCTTACATCCTTCT  
>HPV96\_Beta\_50253426\_nt1701\_Genome\_Tile\_rc|1  
ATAGAAAAGAGTGACATTGGACATAGTGTATGAAGCCATATATAACCACAATGTTCTTGTA  
>HPV96\_Beta\_50253426\_nt1721\_Genome\_Tile\_rc|1  
TTTACCAGTTTTTAAACACAATAGAAAAGAGTGACATTGGACATAGTGTATGAAGCCATAT  
>HPV96\_Beta\_50253426\_nt1741\_Genome\_Tile\_rc|1  
CTTACAACCTGTATCTCTGCTTTTACCAGTTTTTAAACACAATAGAAAAGAGTGACATTGGA  
>HPV96\_Beta\_50253426\_nt1761\_Genome\_Tile\_rc|1  
TTAACATCCTTTGTAACAATCTTACAACCTGTATCTCTGCTTTTACCAGTTTTTAAACACA  
>HPV96\_Beta\_50253426\_nt1781\_Genome\_Tile\_rc|1  
GAGTTGCTCTTTATGAATACTTAACATCCTTTGTAACAATCTTACAACCTGTATCTCTGCT  
>HPV96\_Beta\_50253426\_nt1801\_Genome\_Tile\_rc|1  
AACTTTGGTGGTTCAGTTAAGAGTTGCTCTTTATGAATACTTAACATCCTTTGTAACAAT  
>HPV96\_Beta\_50253426\_nt1821\_Genome\_Tile\_rc|1  
GTACAGCCATAACACTTCGTAACCTTTGGTGGTTCAGTTAAGAGTTGCTCTTTATGAATAC  
>HPV96\_Beta\_50253426\_nt1941\_Genome\_Tile\_rc|1  
ACAATTCAAATTGCAAATTATCGCCCTCATGGTGACTAATCATCGTTTGCTGAACAATCC  
>HPV96\_Beta\_50253426\_nt2021\_Genome\_Tile\_rc|1  
GTCAGCTAATTTAGCATAGTTATATGCAATGTCAGAATCTTCGATATAGTCATTGTCATA  
>HPV96\_Beta\_50253426\_nt2041\_Genome\_Tile\_rc|1  
GCGCGAGCATTTATGTCTTCGTCAGCTAATTTAGCATAGTTATATGCAATGTCAGAATCT  
>HPV96\_Beta\_50253426\_nt2141\_Genome\_Tile\_rc|1  
TTTAGAAATAGACATATATCTCATTTTCACCTCGTTTGTAATGTCTTACCATCCAAGCACA  
>HPV96\_Beta\_50253426\_nt2161\_Genome\_Tile\_rc|1  
TTTAATTTATACCATATCCATTTAGAAATAGACATATATCTCATTTTCACCTCGTTTGTA  
>HPV96\_Beta\_50253426\_nt2201\_Genome\_Tile\_rc|1  
TTTTACTATGTTTGACCAGTGGCCGCCATTTTCTACTTTTTTTAATTTATACCATATCCA  
>HPV96\_Beta\_50253426\_nt2221\_Genome\_Tile\_rc|1  
ATACCTTGGAATCTAACAATTTTACTATGTTTGACCAGTGGCCGCCATTTTCTACTTTT  
>HPV96\_Beta\_50253426\_nt2261\_Genome\_Tile\_rc|1  
AAGGAAGTGTTTGAAGGCATCTAAAAACATTATAAAATTTATACCTTGGAATCTAACAAA  
>HPV96\_Beta\_50253426\_nt2321\_Genome\_Tile\_rc|1  
CGTTTTTGCCACAATCAGAAGGACCATAAAAAATAAATACAGTTTTTTTTTGTCTAGACAA  
>HPV96\_Beta\_50253426\_nt2361\_Genome\_Tile\_rc|1  
CCCTACCACCGAGAGCTTTAATTAGTGACATGCAAAACATCGTTTTTGCCACAATCAGAAG  
>HPV96\_Beta\_50253426\_nt2461\_Genome\_Tile\_rc|1  
TAATTCCAACAAGCTTCTGTAGCATCATCTAACATAGCAATCTTGCTTCCGTTAAAGGT  
>HPV96\_Beta\_50253426\_nt2581\_Genome\_Tile\_rc|1  
AAAATATCATAATTGGAGGTAATCAATAATGGAGGAAATCTAATCTGTATGGGAGCTTTA  
>HPV96\_Beta\_50253426\_nt2601\_Genome\_Tile\_rc|1  
ATCTATACCTCTCATTTTTTAAATATCATAATTGGAGGTAATCAATAATGGAGGAAATC  
>HPV96\_Beta\_50253426\_nt2621\_Genome\_Tile\_rc|1  
TTTAATTCTGCTAACCAGAAATCTATACCTCTCATTTTTTAAATATCATAATTGGAGGT  
>HPV96\_Beta\_50253426\_nt2641\_Genome\_Tile\_rc|1  
TTATTCTTAAATTCAAATATTTAATTCTGCTAACCAGAAATCTATACCTCTCATTTTTT  
>HPV96\_Beta\_50253426\_nt2841\_Genome\_Tile\_rc|1  
TTCTAATTTATCACTCCCTTGTTTCATATATGTCCATGAGCTGGTCTTCTAGAGCATTGAA  
>HPV96\_Beta\_50253426\_nt2981\_Genome\_Tile\_rc|1  
TAAATAACATCTTTAGCTTTTGTCTGAAAGCTGCTAAACTAGGAACAGGAGTGACCCC  
>HPV96\_Beta\_50253426\_nt3041\_Genome\_Tile\_rc|1

AATGTCCAAGGTTTCATCTTTGTAAAGGTGAGTCTCTTAATTTCTCTAGTTGAAGAACCATG  
>HPV96\_Beta\_50253426\_nt3081\_Genome\_Tile\_rc|1  
AACAGGAGGAGCTCTATATGTTTCTAAACTGGTGTTAATCAATGTCCAAGGTTTCATCTTT  
>HPV96\_Beta\_50253426\_nt3101\_Genome\_Tile\_rc|1  
GGACCTTTTTTTAAAGCAGTTAACAGGAGGAGCTCTATATGTTTCTAAACTGGTGTTAATC  
>HPV96\_Beta\_50253426\_nt3181\_Genome\_Tile\_rc|1  
CTTCAAAGTAAATGAACTGCCAGGATGTGTATAACATAATATTTTCAGGATCTGCATCAA  
>HPV96\_Beta\_50253426\_nt3201\_Genome\_Tile\_rc|1  
TTGCCAATGTCCATCAGTGTCTTCAAAGTAAATGAACTGCCAGGATGTGTATAACATAAT  
>HPV96\_Beta\_50253426\_nt3221\_Genome\_Tile\_rc|1  
TCAATACGCCCTTCAGTTTTTTTGCCAATGTCCATCAGTGTCTTCAAAGTAAATGAACTGC  
>HPV96\_Beta\_50253426\_nt3241\_Genome\_Tile\_rc|1  
AATAATATAAACCAGCATAATCAATACGCCCTTCAGTTTTTTTGCCAATGTCCATCAGTGT  
>HPV96\_Beta\_50253426\_nt3261\_Genome\_Tile\_rc|1  
ATGTCTTAATTGCCCTTCCAAATAATATAAACCAGCATAATCAATACGCCCTTCAGTTTT  
>HPV96\_Beta\_50253426\_nt3281\_Genome\_Tile\_rc|1  
ACTTTAAATTCCACGTAATAATGTCTTAATTGCCCTTCCAAATAATATAAACCAGCATAA  
>HPV96\_Beta\_50253426\_nt3301\_Genome\_Tile\_rc|1  
TTCCAAATCTGCGAGCATCTACTTTAAATTCCACGTAATAATGTCTTAATTGCCCTTCCA  
>HPV96\_Beta\_50253426\_nt3421\_Genome\_Tile\_rc|1  
CCTCGGGGACGTCGGGGGGCTCAGCCCGTTCTCTGACCTCTTCGTATGAGGACGGCGAGG  
>HPV96\_Beta\_50253426\_nt3441\_Genome\_Tile\_rc|1  
GGAGTCAGGGGCGGTTCCGACCTCGGGGACGTCGGGGGGCTCAGCCCGTTCTCTGACCTC  
>HPV96\_Beta\_50253426\_nt3461\_Genome\_Tile\_rc|1  
CTCCCAGTCTGTAGGGTGCCGGAGTCAGGGGCGGTTCCGACCTCGGGGACGTCGGGGGGC  
>HPV96\_Beta\_50253426\_nt3581\_Genome\_Tile\_rc|1  
CGTTCTTCGGCTTTCCTGTAGTAGATCGTGATACTTTTTGCCTGACCTGAGGGAGGCA  
>HPV96\_Beta\_50253426\_nt3601\_Genome\_Tile\_rc|1  
ACGATGGACTCCGGGACCGTCGTTCTTCGGCTTTCCTGTAGTAGATCGTGATACTTTTT  
>HPV96\_Beta\_50253426\_nt3641\_Genome\_Tile\_rc|1  
CGTTGTCCCCGTCCCCGTGCACCGGCTTGCTCTGTCCCTGACGATGGACTCCGGGACCGT  
>HPV96\_Beta\_50253426\_nt3661\_Genome\_Tile\_rc|1  
TGGAACGGGCCCCTGGTTCCCCGTGTCCCCGTCCCCGTGCACCGGCTTGCTCTGTCCCTG  
>HPV96\_Beta\_50253426\_nt3841\_Genome\_Tile\_rc|1  
CCACTTGTGAAGCTGGAATGCCACACTGGTCAATAGATCTGCACTCTGCAGATCTACTTC  
>HPV96\_Beta\_50253426\_nt4001\_Genome\_Tile\_rc|1  
TTATCAAAAAGAGCCTCTAAGTTTGTCTTTCACCCTGTAGCGATAACATTTTAAAGTATTT  
>HPV96\_Beta\_50253426\_nt4021\_Genome\_Tile\_rc|1  
ATGACCATGTTGTACTAATTTTATCAAAAAGAGCCTCTAAGTTTGTCTTTCACCCTGTAGC  
>HPV96\_Beta\_50253426\_nt4041\_Genome\_Tile\_rc|1  
ATTACCTTGTGAAGCCACCCATGACCATGTTGTACTAATTTTATCAAAAAGAGCCTCTAAG  
>HPV96\_Beta\_50253426\_nt4101\_Genome\_Tile\_rc|1  
TTTTTCCCTCTGATCTTCTGAAACAAAGCTAAGCAGCATGCGAGCTCTACCTATGCGTGT  
>HPV96\_Beta\_50253426\_nt4181\_Genome\_Tile\_rc|1  
TGAAATGTTAGTAGTTAAAGACTATCAAAGCTACCAAAGGACCAATCAACACCCTTAGGT  
>HPV96\_Beta\_50253426\_nt4201\_Genome\_Tile\_rc|1  
TAGTTATTAGTATAAAAAAATGAAATGTTAGTAGTTAAAGACTATCAAAGCTACCAAAGG  
>HPV96\_Beta\_50253426\_nt4221\_Genome\_Tile\_rc|1  
ATACAATATATAAAGTGGGTTAGTTATTAGTATAAAAAAATGAAATGTTAGTAGTTAAAG  
>HPV96\_Beta\_50253426\_nt4241\_Genome\_Tile\_rc|1  
TTACTCTACGTGCGCGGCCATACAATATATAAAGTGGGTTAGTTATTAGTATAAAAAA  
>HPV96\_Beta\_50253426\_nt4481\_Genome\_Tile\_rc|1  
CAGTTGGTGTACCACCCACGCGAACACCAGGTGCAGGTCCTTCAGGCAAAGGGACATAAC  
>HPV96\_Beta\_50253426\_nt4621\_Genome\_Tile\_rc|1  
AATTTCTCCTGGCAACAAATCAGGTCCTGTGTCTGTAAGAGGGACAACCTGAAGGTGCAAC

>HPV96\_Beta\_50253426\_nt4641\_Genome\_Tile\_rc|1  
TGTACCTCAGCAATGGTCTCAATTTCTCCTGGCAACAAATCAGGTCTGTGTCTGTAAGA  
>HPV96\_Beta\_50253426\_nt4701\_Genome\_Tile\_rc|1  
CTCGAGCCTCTACCACCTGTCAACCTGGTGTGTCAACAGGTGTTACATCTGACACAGGA  
>HPV96\_Beta\_50253426\_nt4881\_Genome\_Tile\_rc|1  
CCACTACCACCAATATTTTGTCTCCAGAACCTGATTGTACAATGATTTGGTCAGATAAC  
>HPV96\_Beta\_50253426\_nt4921\_Genome\_Tile\_rc|1  
TCTTGTGGGGAACCTCTTCTAATTCTATTTCCACAGAAGGCCCACTACCACCAATATTTTG  
>HPV96\_Beta\_50253426\_nt5001\_Genome\_Tile\_rc|1  
GCTCGTGAGGCCTGCTGAGCCATTCTTACAGGTGTACTAGTTTTTCTAGGAGGGGTGGC  
>HPV96\_Beta\_50253426\_nt5021\_Genome\_Tile\_rc|1  
TGTATAAAGCTCTACGTAAAGCTCGTGAGGCCCTGCTGAGCCATTCTTACAGGTGTACTAG  
>HPV96\_Beta\_50253426\_nt5041\_Genome\_Tile\_rc|1  
CTGTTGTGTTAATCTACGATTGTATAAAGCTCTACGTAAAGCTCGTGAGGCCTGCTGAGC  
>HPV96\_Beta\_50253426\_nt5061\_Genome\_Tile\_rc|1  
AGAGGATTTTCTACAGAAACCTGTTGTGTTAATCTACGATTGTATAAAGCTCTACGTAAA  
>HPV96\_Beta\_50253426\_nt5081\_Genome\_Tile\_rc|1  
TAGAAGGCTGTTGTAAAAATAGAGGATTTTCTACAGAAACCTGTTGTGTTAATCTACGAT  
>HPV96\_Beta\_50253426\_nt5101\_Genome\_Tile\_rc|1  
AAATTGAAAAGTAACTAATTTAGAGGCTGTTGTAAAAATAGAGGATTTTCTACAGAAAC  
>HPV96\_Beta\_50253426\_nt5321\_Genome\_Tile\_rc|1  
TGTAAGAGTGAACCTTGAGTGCCAACCTGTGCTCCAGAGCGTGTCTGATGGTTGCTCGTT  
>HPV96\_Beta\_50253426\_nt5341\_Genome\_Tile\_rc|1  
GTCAATAGTGCTTATATCTCTGTAAAAAGTGAACCTTGAGTGCCAACCTGTGCTCCAGAGCG  
>HPV96\_Beta\_50253426\_nt5361\_Genome\_Tile\_rc|1  
AATTCAATGGAGGGTCTGTGTCAATAGTGCTTATATCTCTGTAAAAAGTGAACCTTGAGTG  
>HPV96\_Beta\_50253426\_nt5481\_Genome\_Tile\_rc|1  
GAATGTAATCTGGCACTTCCTCCAAAGTAGGAATTTCTTGTACATCCATATTAACAAAT  
>HPV96\_Beta\_50253426\_nt5501\_Genome\_Tile\_rc|1  
CCTCTAATAGCACATCTTCAGAATGTAATCTGGCACTTCCTCCAAAGTAGGAATTTCTT  
>HPV96\_Beta\_50253426\_nt5521\_Genome\_Tile\_rc|1  
ACTAAAGTCTTCTAATGCCTCCTCTAATAGCACATCTTCAGAATGTAATCTGGCACTTC  
>HPV96\_Beta\_50253426\_nt5541\_Genome\_Tile\_rc|1  
CCAAAACTAATTGTGCTCCACTAAAGTCTTCTAATGCCTCCTCTAATAGCACATCTTCA  
>HPV96\_Beta\_50253426\_nt5601\_Genome\_Tile\_rc|1  
TTAATCTCTCTTGGAGTCTCAAATCTAGGAATAGTTATTACATTTGATCTTCTAGAATTT  
>HPV96\_Beta\_50253426\_nt5621\_Genome\_Tile\_rc|1  
CTAAATCTGGTGTATAAATATTAATCTCTCTTGGAGTCTCAAATCTAGGAATAGTTATTA  
>HPV96\_Beta\_50253426\_nt5641\_Genome\_Tile\_rc|1  
ATATGATATGTAATATCCATCTAAATCTGGTGTATAAATATTAATCTCTCTTGGAGTCTC  
>HPV96\_Beta\_50253426\_nt5661\_Genome\_Tile\_rc|1  
GGAATATTCCTTGTCTGGATATGATATGTAATATCCATCTAAATCTGGTGTATAAATA  
>HPV96\_Beta\_50253426\_nt5681\_Genome\_Tile\_rc|1  
GCTCAGTGATATAACTTCTGGAATATTCCTTGTCTGGATATGATATGTAATATCCAT  
>HPV96\_Beta\_50253426\_nt5701\_Genome\_Tile\_rc|1  
TATTGTTGGAGTCGTGTCTGGCTCAGTGATATAACTTCTGGAATATTCCTTGTCTGG  
>HPV96\_Beta\_50253426\_nt5721\_Genome\_Tile\_rc|1  
AAATCCTCTGTATGAATTATTATTGTTGGAGTCGTGTCTGGCTCAGTGATATAACTTCT  
>HPV96\_Beta\_50253426\_nt7341\_Genome\_Tile\_rc|1  
TAGCGGTCAGCGTCGTTTTTCGTTTTGTACCTCTTGAGGTTGTAGCCCTCCCGTTACAGT  
>HPV96\_Beta\_50253426\_nt7361\_Genome\_Tile\_rc|1  
ATTGAAGGTCCCCGAACCGATAGCGGTCAGCGTCGTTTTTCGTTTTGTACCTCTTGAGGTT  
>HPV93\_Beta\_37089393\_nt0041\_Genome\_Tile\_rc|1  
CAATACTTATAACAGGTGCTACGAAATCGGTGCAAGAAAATACTTGTTGAGTAATAAAG  
>HPV93\_Beta\_37089393\_nt0061\_Genome\_Tile\_rc|1

CTGCCTTATATACCATATATCAATACTTATAAACAGGTGCTACGAAATCGGTGCAAGAAA  
>HPV93\_Beta\_37089393\_nt0101\_Genome\_Tile\_rc|1  
GTAATGGTCTGAGGTTTACTTACTGCCGCCATTAAGATGTCTGCCTTATATACCATATAT  
>HPV93\_Beta\_37089393\_nt0121\_Genome\_Tile\_rc|1  
CAAGACACCTAGCAAGCTCTGTAATGGTCTGAGGTTTACTTACTGCCGCCATTAAGATGT  
>HPV93\_Beta\_37089393\_nt0161\_Genome\_Tile\_rc|1  
CAAAAATTACAAGGCACCAAAGCATCTTCTAACGGTATACCAAGACACCTAGCAAGCTCT  
>HPV93\_Beta\_37089393\_nt0181\_Genome\_Tile\_rc|1  
AATATGTTAAAAACTTTTTACAAAAATTACAAGGCACCAAAGCATCTTCTAACGGTATAC  
>HPV93\_Beta\_37089393\_nt0221\_Genome\_Tile\_rc|1  
ATTAGACAAAGTTGTTTTACATCAAATTC AACGACTTCCAAATATGTTAAAAACTTTTTA  
>HPV93\_Beta\_37089393\_nt0301\_Genome\_Tile\_rc|1  
TCAAGTAATTATCAAATTCATACGTGGCTGATGCTATACAACAACATCTGCAACAGCCAA  
>HPV93\_Beta\_37089393\_nt0361\_Genome\_Tile\_rc|1  
TAATTTTCAGAGAGTGGCTTTTTTTCCTTAACCTTCTATTGCCAGCCAACAACACTATCAT  
>HPV93\_Beta\_37089393\_nt0381\_Genome\_Tile\_rc|1  
ACAATGGCGACACCTCACTATAATTTTCAGAGAGTGGCTTTTTTTCCTTAACCTTCTATTGC  
>HPV93\_Beta\_37089393\_nt0401\_Genome\_Tile\_rc|1  
ATTTGATCTAATTTTTTCATACAATGGCGACACCTCACTATAATTTTCAGAGAGTGGCTTT  
>HPV93\_Beta\_37089393\_nt0681\_Genome\_Tile\_rc|1  
CAGCAACAAATATTTCGAAGTCGGGATCCACAGCCTCCGCCGAGAACACAATAATCTTGA  
>HPV93\_Beta\_37089393\_nt0721\_Genome\_Tile\_rc|1  
ACTAGCAATTGCTGAAAGCAACGAACCTCCAAATTCTGTGGCAGCAACAAATATTTCGAAGT  
>HPV93\_Beta\_37089393\_nt1021\_Genome\_Tile\_rc|1  
CCCTGGGACTAATATACTTTTCGCTTTAATGATTGCAATAAAGTCTCGCTGTCTTCTAACT  
>HPV93\_Beta\_37089393\_nt1181\_Genome\_Tile\_rc|1  
GGTACCTCCTCCTTTTGTTCACCTGTGTAACAATATCTTCAACTTCATTTGTTAAGTTC  
>HPV93\_Beta\_37089393\_nt1201\_Genome\_Tile\_rc|1  
TCAAGTTTGTGGATGCTGTTCGGTACCTCCTCCTTTTGTTCACCTGTGTAACAATATCTT  
>HPV93\_Beta\_37089393\_nt1221\_Genome\_Tile\_rc|1  
ATGTACATTTTCCCCCTCCCTCAAGTTTGTGGATGCTGTTCGGTACCTCCTCCTTTTGTTC  
>HPV93\_Beta\_37089393\_nt1241\_Genome\_Tile\_rc|1  
CATCTCATAAGTTCCTTGTAATGTACATTTTCCCCCTCCCTCAAGTTTGTGGATGCTGTTC  
>HPV93\_Beta\_37089393\_nt1281\_Genome\_Tile\_rc|1  
ACTTTTGAATTTTGAAGTAATGTAGCTTTCAAATTACTACATCTCATAAGTTCCTTGTA  
>HPV93\_Beta\_37089393\_nt1321\_Genome\_Tile\_rc|1  
TATACTGCCGCGTCAACTCTGCAAACTAACACCAAAGCACTTTTGAATTTTGAAGTA  
>HPV93\_Beta\_37089393\_nt1401\_Genome\_Tile\_rc|1  
TTTTTTTGAACCTTCAAACAAATCATTATTCACACCATAAATTGCAATCACCCAATCGTT  
>HPV93\_Beta\_37089393\_nt1421\_Genome\_Tile\_rc|1  
TCACAGTGCTGTTGCAGCAATTTTTTGAACCTTCAAACAAATCATTATTCACACCATAA  
>HPV93\_Beta\_37089393\_nt1441\_Genome\_Tile\_rc|1  
TTTCAGTGAGCCAAATATAATCACAGTGCTGTTGCAGCAATTTTTTGAACCTTCAAACA  
>HPV93\_Beta\_37089393\_nt1501\_Genome\_Tile\_rc|1  
TCACAGTATGCCTATTCTTCCCAGCTTTAAACATAATAAATATAAATACATTGCAGACA  
>HPV93\_Beta\_37089393\_nt1521\_Genome\_Tile\_rc|1  
CATAGAGATTAATAATCTTATCACAGTATGCCTATTCTTCCCAGCTTTAAACATAATAA  
>HPV93\_Beta\_37089393\_nt1541\_Genome\_Tile\_rc|1  
TGTTCCCTCTGCAACATGTAGCATAGAGATTAATAATCTTATCACAGTATGCCTATTCTTC  
>HPV93\_Beta\_37089393\_nt1561\_Genome\_Tile\_rc|1  
TTGGTGGTTTCAGACAGTATTTGTTCCCTCTGCAACATGTAGCATAGAGATTAATAATCTTA  
>HPV93\_Beta\_37089393\_nt1581\_Genome\_Tile\_rc|1  
TGCTACAGTGCTTCTAAGCTTTGGTGGTTTCAGACAGTATTTGTTCCCTCTGCAACATGTAG  
>HPV93\_Beta\_37089393\_nt1661\_Genome\_Tile\_rc|1  
GTTTGTCTACTATCCATTTAGGATATGAACCATGGGTAAATGTTCCCGAGTTGGAAGT

>HPV93\_Beta\_37089393\_nt2021\_Genome\_Tile\_rc|1  
AAGTCCTTCAAAGCAGAGAGAAAACCTTATAAAATTAATACCTTGGTATCTAATAAATTTT  
>HPV93\_Beta\_37089393\_nt2641\_Genome\_Tile\_rc|1  
TTCTTTACGAAGAAGCCGCCAATGTTCTATTTGTGCTTCTAGGGTATCACTAGCAACTTC  
>HPV93\_Beta\_37089393\_nt2721\_Genome\_Tile\_rc|1  
TCAGATGTTGCAAGTGGTGGTACTGGCTGATACCCAAGTCTTAAAACACCATTTTGCCTA  
>HPV93\_Beta\_37089393\_nt2781\_Genome\_Tile\_rc|1  
GCTGACTTTTGTAAATGACTGCAGCTGTAACATCATGCCAATTGCCTCTTTGGCTTTTGCT  
>HPV93\_Beta\_37089393\_nt2801\_Genome\_Tile\_rc|1  
TCCACTTTTTCAGATGCATAGGCTGACTTTTGTAAATGACTGCAGCTGTAACATCATGCCAA  
>HPV93\_Beta\_37089393\_nt3041\_Genome\_Tile\_rc|1  
CAAACAAAGTATAGTAATGCTTGAAATCCTTTATAGTATAATAAATGCCTGTATGATTTG  
>HPV93\_Beta\_37089393\_nt3061\_Genome\_Tile\_rc|1  
ATATTTTTTTGCATCGTCAGCAAACAAAGTATAGTAATGCTTGAAATCCTTTATAGTATA  
>HPV93\_Beta\_37089393\_nt3181\_Genome\_Tile\_rc|1  
GTGAGCGGTGGACTCTGGGGAAGCTCTTCTCGTCCTGGGGATTCTGGCGGCGTGGAGCT  
>HPV93\_Beta\_37089393\_nt3201\_Genome\_Tile\_rc|1  
GAACGGGCGGTGGTCTTGGTGTGAGCGGTGGACTCTGGGGAAGCTCTTCTCGTCCTGGG  
>HPV93\_Beta\_37089393\_nt3401\_Genome\_Tile\_rc|1  
AAGAGGATCGCGACCGAGATCGAGATTGAGAGGATGTTGTTCTGGACCGCGACCTTCGCC  
>HPV93\_Beta\_37089393\_nt3421\_Genome\_Tile\_rc|1  
CCCCCTTGATCCTCTAGAGGAAGAGGATCGCGACCGAGATCGAGATTGAGAGGATGTTGT  
>HPV93\_Beta\_37089393\_nt3801\_Genome\_Tile\_rc|1  
GTTGTGCTAAATGCCTTGATAAGCCTTTTATACTTTTGTGTTTGCCCGATTCCCTAAAGCAT  
>HPV93\_Beta\_37089393\_nt3901\_Genome\_Tile\_rc|1  
TACCTTTAAAAAAGAGCTGCGCTGTGTATGGCTGGTAAACTTACGAGCACTCTGGACCT  
>HPV93\_Beta\_37089393\_nt3921\_Genome\_Tile\_rc|1  
ACTCCTTTTGAAACTTAACTACCTTTAAAAAAGAGCTGCGCTGTGTATGGCTGGTAAAA  
>HPV93\_Beta\_37089393\_nt3941\_Genome\_Tile\_rc|1  
AGTTGCCTAAAGACCAATCTACTCCTTTTGAAACTTAACTACCTTTAAAAAAGAGCTGC  
>HPV93\_Beta\_37089393\_nt3961\_Genome\_Tile\_rc|1  
TTAGTATTATAGTTTATCTAAGTTGCCTAAAGACCAATCTACTCCTTTTGAAACTTAAC  
>HPV93\_Beta\_37089393\_nt4021\_Genome\_Tile\_rc|1  
CCATTGCAAGAATATACAAAAACAAAGAAAGCTTGGTTATATGTTAGTAGCAAAAGCAAG  
>HPV93\_Beta\_37089393\_nt4381\_Genome\_Tile\_rc|1  
TTTCTGTTAATGGAACAATTGAAGATGAGGATGGTTCTACAGGAGCTATGGTATCTACGG  
>HPV93\_Beta\_37089393\_nt4401\_Genome\_Tile\_rc|1  
TAATAAATCTACACCAGAAGTTTCTGTTAATGGAACAATTGAAGATGAGGATGGTTCTAC  
>HPV93\_Beta\_37089393\_nt4421\_Genome\_Tile\_rc|1  
ATAGATTCAATTTCTCCTGGTAATAAATCTACACCAGAAGTTTCTGTTAATGGAACAATT  
>HPV93\_Beta\_37089393\_nt4441\_Genome\_Tile\_rc|1  
GTACAGGATGTACTTCTGCAATAGATTCAATTTCTCCTGGTAATAAATCTACACCAGAAG  
>HPV93\_Beta\_37089393\_nt4501\_Genome\_Tile\_rc|1  
AAATTGCACTGGAACCTTTACTGGTGGTAACAACCTGGTGTATCAAACTGGCAACATCAG  
>HPV93\_Beta\_37089393\_nt4521\_Genome\_Tile\_rc|1  
TGGATCGGGAGCAACTTCTAAAATTGCACTGGAACCTTTACTGGTGGTAACAACCTGGTGT  
>HPV93\_Beta\_37089393\_nt4701\_Genome\_Tile\_rc|1  
AGGGAATTCTTGCAACTCGATTTCTTCAGCTCTACCTACTGACTGTCCACCAGAACCAGA  
>HPV93\_Beta\_37089393\_nt4721\_Genome\_Tile\_rc|1  
ATTTCAAATGAATATCTACTAGGGAATTCTTGCAACTCGATTCTTCAGCTCTACCTACT  
>HPV93\_Beta\_37089393\_nt4781\_Genome\_Tile\_rc|1  
ACAGCTTGCTCTAAGTCTTTGTAAAGGAGTGCTACTTCTCCTTGGTGGAGTAGGTGTTTCT  
>HPV93\_Beta\_37089393\_nt4801\_Genome\_Tile\_rc|1  
TTGTTAAAGATCTGCCCTTACAGCTTGCTCTAAGTCTTTGTAAAGGAGTGCTACTTCTCC  
>HPV93\_Beta\_37089393\_nt4821\_Genome\_Tile\_rc|1

TTGTTGTATTAACCGTCTATTTGTTAAAGATCTGCCCCCTTACAGCTTGTCTAAGTCTTTG  
>HPV93\_Beta\_37089393\_nt4981\_Genome\_Tile\_rc|1  
GAGTTTGAATATCAAGAAAATCTCTGTTGGTGGTTCTATAAAATCATCTAAATCTTGCT  
>HPV93\_Beta\_37089393\_nt5101\_Genome\_Tile\_rc|1  
TATAAAAGTGTACCTGTGACCCAATTTGGGCCCCGAGCGTGTACGAATAGTGGCTCGTT  
>HPV93\_Beta\_37089393\_nt5301\_Genome\_Tile\_rc|1  
ATCTTCTACTGCTTCATCTAATAATGCATCCTCTGTATGTGCCTCAGGGTATGATTCCAA  
>HPV93\_Beta\_37089393\_nt5321\_Genome\_Tile\_rc|1  
ACCAATTGAGAACCCTGAAATCTTCTACTGCTTCATCTAATAATGCATCCTCTGTATGT  
>HPV93\_Beta\_37089393\_nt5361\_Genome\_Tile\_rc|1  
AGGTACTGTGTAAGTAGAGGTAGATCTTCTATTGCCAATTACCAATTGAGAACCCTGAA  
>HPV93\_Beta\_37089393\_nt5381\_Genome\_Tile\_rc|1  
TTTCTTGGGGTTTCAAAGCGAGGTACTGTGTAAGTAGAGGTAGATCTTCTATTGCCAATT  
>HPV93\_Beta\_37089393\_nt5401\_Genome\_Tile\_rc|1  
CTTGTGTGTAATATGTAGCATTTCTTGGGGTTTCAAAGCGAGGTACTGTGTAAGTAGAGG  
>HPV93\_Beta\_37089393\_nt5421\_Genome\_Tile\_rc|1  
TACATAATAACCTTTTAAGTCTTGTGTGTAATATGTAGCATTTCTTGGGGTTTCAAAGCG  
>HPV93\_Beta\_37089393\_nt5441\_Genome\_Tile\_rc|1  
TCTCTAGATTCTGGATATGATACATAATAACCTTTTAAGTCTTGTGTGTAATATGTAGCA  
>HPV93\_Beta\_37089393\_nt5461\_Genome\_Tile\_rc|1  
GATAAATAAATTTGCAAATCATCTCTAGATTCTGGATATGATACATAATAACCTTTTAAGT  
>HPV93\_Beta\_37089393\_nt5481\_Genome\_Tile\_rc|1  
TGCTGGGAGATCTGGAGAGGGATAAATAATTTGCAAATCATCTCTAGATTCTGGATATGA  
>HPV93\_Beta\_37089393\_nt5501\_Genome\_Tile\_rc|1  
TCATATGTATGAATTACAACCTGCTGGGAGATCTGGAGAGGGATAAATAATTTGCAAATCA  
>HPV93\_Beta\_37089393\_nt5521\_Genome\_Tile\_rc|1  
AATAAAAAATCCCCACTATTATCATATGTATGAATTACAACCTGCTGGGAGATCTGGAGAGG  
>HPV93\_Beta\_37089393\_nt5541\_Genome\_Tile\_rc|1  
CCGTAGTAAACTTGGGTGTAAATAAAAAATCCCCACTATTATCATATGTATGAATTACAAC  
>HPV93\_Beta\_37089393\_nt6161\_Genome\_Tile\_rc|1  
TTTACTAATTGTATAGGTGGGCAAATCCCATTTTGGTCATTGGCTCCATCACATTTAGGT  
>HPV93\_Beta\_37089393\_nt6181\_Genome\_Tile\_rc|1  
CCCCATCTTGAATAACAGTGTCTTACTAATTGTATAGGTGGGCAAATCCCATTTTGGTCAT  
>HPV93\_Beta\_37089393\_nt6421\_Genome\_Tile\_rc|1  
CTGCGTCTATTTGTTTACCAGGAATGTCATCTCCTACGTTGCCACCTCTTACAAAAAAGT  
>HPV93\_Beta\_37089393\_nt6441\_Genome\_Tile\_rc|1  
AAAATCATTTTTATATGTGCCTGCGTCTATTTGTTTACCAGGAATGTCATCTCCTACGTT  
>HPV93\_Beta\_37089393\_nt6681\_Genome\_Tile\_rc|1  
TATTTTCCCAGGGTCTGTATAAACACTAATACTGAAGTTTGTGTTTCTTGTGTTGTCTAC  
>HPV93\_Beta\_37089393\_nt6901\_Genome\_Tile\_rc|1  
TATTAATATATCGATAAGTACTCTGTAACGGATTGTCTGGAGTTGGGACAAACCCTAATT  
>HPV93\_Beta\_37089393\_nt6941\_Genome\_Tile\_rc|1  
TCCTTTGGTGGAACCTTATCGGGACATGGTGTAGCTAAACTATTAATATATCGATAAGTA  
>HPV93\_Beta\_37089393\_nt7101\_Genome\_Tile\_rc|1  
AGTTCCTCGAGAAATAGATGATGACCGTTTAGCTGGTGATTGTACAAGATTGCCTGATA  
>HPV93\_Beta\_37089393\_nt7121\_Genome\_Tile\_rc|1  
TATTTGCTTCTTTTTCTTTTAGTTCCCTCGAGAAATAGATGATGACCGTTTAGCTGGTGAT  
>HPV93\_Beta\_37089393\_nt7161\_Genome\_Tile\_rc|1  
CTGTTTGATATACTCTTTATTGTACCAAAAGTGGTAAAATTATTGCTTCTTTTTCTTTT  
>HPV93\_Beta\_37089393\_nt7181\_Genome\_Tile\_rc|1  
ATACAAGCATTTCTTGAATACTGTTTGATATACTCTTTATTGTACCAAAAGTGGTAAAAT  
>HPV93\_Beta\_37089393\_nt7201\_Genome\_Tile\_rc|1  
CAAATTAGTCAGACATATGAATACAAGCATTTCTTGAATACTGTTTGATATACTCTTTAT  
>HPV93\_Beta\_37089393\_nt7341\_Genome\_Tile\_rc|1  
TGCCAGCAGAAAAGGCGCCAAATGTGGTAGGATGCGCCAAATCCGAGCGTGTGGAACCT



>HPV92\_Beta\_27531786\_nt0021\_Genome\_Tile\_rc|1  
GTATTTATATACTAGCTGTTTGTATTATAACGCAGGCGGTTACGTGTTTTCTATGGCGT  
>HPV92\_Beta\_27531786\_nt0061\_Genome\_Tile\_rc|1  
AGGAGGTTTTGCCATTGTGATGGGAACACTTTCACTGCCTGTATTTATATACTAGCTGTT  
>HPV92\_Beta\_27531786\_nt0081\_Genome\_Tile\_rc|1  
CTTCTAAGTTCCTGCACCGAAGGAGGTTTTGCCATTGTGATGGGAACACTTTCACTGCCT  
>HPV92\_Beta\_27531786\_nt0101\_Genome\_Tile\_rc|1  
CCAATGGAATATCTAACTGTCTTCTAAGTTCCTGCACCGAAGGAGGTTTTGCCATTGTGA  
>HPV92\_Beta\_27531786\_nt0141\_Genome\_Tile\_rc|1  
AAAAAAGCCTCACAAAAATTACAATGCAATAAAATGTCCTCCAATGGAATATCTAACTGT  
>HPV92\_Beta\_27531786\_nt0161\_Genome\_Tile\_rc|1  
GCAGTAGCTCCTCAAATGTTAAAAAGCCTCACAAAAATTACAATGCAATAAAATGTCCT  
>HPV92\_Beta\_27531786\_nt0181\_Genome\_Tile\_rc|1  
TAAATTTTTTGCATCAAATTGCAGTAGCTCCTCAAATGTTAAAAAGCCTCACAAAAATT  
>HPV92\_Beta\_27531786\_nt0201\_Genome\_Tile\_rc|1  
TTCTCCTTCCAAATTAAATTTAAATTTTTTGCATCAAATTGCAGTAGCTCCTCAAATGTT  
>HPV92\_Beta\_27531786\_nt0221\_Genome\_Tile\_rc|1  
CACAGCAAGCATAAGCATAATTCTCCTTCCAAATTAAATTTAAATTTTTTGCATCAAATT  
>HPV92\_Beta\_27531786\_nt0241\_Genome\_Tile\_rc|1  
TACTTGTTTAGCACAAAGCACAGCAAGCATAAGCATAATTCTCCTTCCAAATTAAATT  
>HPV92\_Beta\_27531786\_nt0261\_Genome\_Tile\_rc|1  
TGTTTTGTTTCTATTGCTGCTACTTGTTTAGCACAAAGCACAGCAAGCATAAGCATAA  
>HPV92\_Beta\_27531786\_nt0321\_Genome\_Tile\_rc|1  
AAAAGACTACCTGAGTCCCTTTCTATAGCATCCTTTCCTTGACACTATACTCATAAAAA  
>HPV92\_Beta\_27531786\_nt0341\_Genome\_Tile\_rc|1  
ATCTAACAGTTAAACAACACAAAAGACTACCTGAGTCCCTTTCTATAGCATCCTTTCCTT  
>HPV92\_Beta\_27531786\_nt0361\_Genome\_Tile\_rc|1  
ATGTCTTAAACAAAACCTTACATCTAACAGTTAAACAACACAAAAGACTACCTGAGTCCCT  
>HPV92\_Beta\_27531786\_nt0381\_Genome\_Tile\_rc|1  
AATTTCTCTAAGTAATCCAAATGTCTTAAACAAAACCTTACATCTAACAGTTAAACAACAC  
>HPV92\_Beta\_27531786\_nt0401\_Genome\_Tile\_rc|1  
TGCCTGATGCACAACTGCCAATTTCTCTAAGTAATCCAAATGTCTTAAACAAAACCTTAC  
>HPV92\_Beta\_27531786\_nt0421\_Genome\_Tile\_rc|1  
TCTAACTCTATCAAAAGGAATGCCTGATGCACAACTGCCAATTTCTCTAAGTAATCCAA  
>HPV92\_Beta\_27531786\_nt0461\_Genome\_Tile\_rc|1  
ATATCTCTGTACAAAACCTACACACTGCCTTCCAAGCTCCTCTAACTCTATCAAAAGGAA  
>HPV92\_Beta\_27531786\_nt0641\_Genome\_Tile\_rc|1  
AAAATTTCGAAGCTTAATTCGCGAGCCACCACAGGAAACTATCTTGTAGTCTATTCTT  
>HPV92\_Beta\_27531786\_nt0901\_Genome\_Tile\_rc|1  
TTGGGGATTTCCTAATCTGCGTCCCCAAGGTCCCATCATCTAATAAATCTGAAATATC  
>HPV92\_Beta\_27531786\_nt1061\_Genome\_Tile\_rc|1  
GTTCTCGAACAGTCGCCTCTTACTTTTGCGTTGAGGCGAAATAGTAATAGATTCCAATT  
>HPV92\_Beta\_27531786\_nt1081\_Genome\_Tile\_rc|1  
AAGCTCAAGTCCGCTGTCCTGTTTCCTCGAACAGTCGCCTCTTACTTTTGCGTTGAGGCGA  
>HPV92\_Beta\_27531786\_nt1181\_Genome\_Tile\_rc|1  
CCTTAGTTTCTGCTGTAGCAGAAACAGTTTCTGGGACGTCATCTTTTGACCCCGGTACCT  
>HPV92\_Beta\_27531786\_nt1201\_Genome\_Tile\_rc|1  
ATGTTCTTTGTTTTGGCTTCCCTTAGTTTCTGCTGTAGCAGAAACAGTTTCTGGGACGTC  
>HPV92\_Beta\_27531786\_nt1241\_Genome\_Tile\_rc|1  
ATGTAGCCCGCGCATTGCTGCACTGTAGTAAGTGTGTAATGTTCTTTGTTTTGGCTTC  
>HPV92\_Beta\_27531786\_nt1261\_Genome\_Tile\_rc|1  
AGCTTTAAATTTACTAAGCAATGTAGCCCGCGCATTGCTGCACTGTAGTAAGTGTGTA  
>HPV92\_Beta\_27531786\_nt1441\_Genome\_Tile\_rc|1  
ATACAAAGATATTGGAGATAAAACATGCAACCAAATATATTACAATGCTGCTGAAATAA  
>HPV92\_Beta\_27531786\_nt1461\_Genome\_Tile\_rc|1

CCAGTTTTTAAAACATAGTAAATACAAAGATATTGGAGATAAAAACATGCAACCAAATATAT  
>HPV92\_Beta\_27531786\_nt1481\_Genome\_Tile\_rc|1  
TTACAGTATTTCTGCTTTTTTCCAGTTTTTAAAACATAGTAAATACAAAGATATTGGAGATA  
>HPV92\_Beta\_27531786\_nt1501\_Genome\_Tile\_rc|1  
AATGGACATCAACAAGTTCCTTTACAGTATTTCTGCTTTTTTCCAGTTTTTAAAACATAGTAA  
>HPV92\_Beta\_27531786\_nt1521\_Genome\_Tile\_rc|1  
TGTGCATCCCCAACATTTAAATGGACATCAACAAGTTCCTTTACAGTATTTCTGCTTTTT  
>HPV92\_Beta\_27531786\_nt1561\_Genome\_Tile\_rc|1  
TGCTACTACGCTGCGAATCTGGGGTGGATCAGCTATAAGCTGTGCATCCCCAACATTTAA  
>HPV92\_Beta\_27531786\_nt1601\_Genome\_Tile\_rc|1  
ATACATTTTTTATTCATAGATTCTTTGTACCAAAACAAAGCTGCTACTACGCTGCGAATCT  
>HPV92\_Beta\_27531786\_nt1621\_Genome\_Tile\_rc|1  
TGGGTATTCTCCATGGGTATATACATTTTTTATTCATAGATTCTTTGTACCAAAACAAAGC  
>HPV92\_Beta\_27531786\_nt1661\_Genome\_Tile\_rc|1  
ATTCTGATGAGAAAGCAATGTTTGATTGCTATCCACTCTGGGTATTCTCCATGGGTAT  
>HPV92\_Beta\_27531786\_nt1681\_Genome\_Tile\_rc|1  
ATCAAATTGCTGTGTTTCATATTCCTGATGAGAAAGCAATGTTTGATTGCTATCCACTC  
>HPV92\_Beta\_27531786\_nt1701\_Genome\_Tile\_rc|1  
CACTGAATCATCTACTTAAATCAAATTGCTGTGTTTCATATTCCTGATGAGAAAGCAAT  
>HPV92\_Beta\_27531786\_nt1921\_Genome\_Tile\_rc|1  
TGGTCCTTCAATTGATTTCAATCTAGTATAAATCCAGGCTGACATACTCATATTTTTTCAT  
>HPV92\_Beta\_27531786\_nt1941\_Genome\_Tile\_rc|1  
ACAATGTCTGACCAATGGCCTGGTCTTCAATTGATTTCAATCTAGTATAAATCCAGGCT  
>HPV92\_Beta\_27531786\_nt1961\_Genome\_Tile\_rc|1  
GCTGAAATCGTATAAATTTAACAATGTCTGACCAATGGCCTGGTCTTCAATTGATTTCA  
>HPV92\_Beta\_27531786\_nt2001\_Genome\_Tile\_rc|1  
AATTGCTTGAATACATCTAGAAACATTATAAAATTAATCTGCTGAAATCGTATAAATTTA  
>HPV92\_Beta\_27531786\_nt2201\_Genome\_Tile\_rc|1  
TCCAACAGCACTCGGTGGCATCATCTAGTAGTGAATTTTAGATTCTACTAATGGAGATA  
>HPV92\_Beta\_27531786\_nt2281\_Genome\_Tile\_rc|1  
TTGGACCGGATTTTTATGCTTACAATCCACACTAACCATGTTACCATCTATTCCATTTCT  
>HPV92\_Beta\_27531786\_nt2321\_Genome\_Tile\_rc|1  
TATTATTATTTGATGTAATCAATAATGGTGGAATCTAATTTGGACCGGATTTTTATGCT  
>HPV92\_Beta\_27531786\_nt2341\_Genome\_Tile\_rc|1  
ATACTTTGGATCAGACATTATATTATTATTGATGTAATCAATAATGGTGGAATCTAAT  
>HPV92\_Beta\_27531786\_nt2361\_Genome\_Tile\_rc|1  
ATTCTACTATGCAGATATTTATACTTTGGATCAGACATTATATTATTATTGATGTAATC  
>HPV92\_Beta\_27531786\_nt2381\_Genome\_Tile\_rc|1  
TTACAAACTCAAATGCTTTAATTCTACTATGCAGATATTTATACTTTGGATCAGACATTA  
>HPV92\_Beta\_27531786\_nt2401\_Genome\_Tile\_rc|1  
GTCCTTAAATGGAACTTATTTACAAACTCAAATGCTTTAATTCTACTATGCAGATATTT  
>HPV92\_Beta\_27531786\_nt2601\_Genome\_Tile\_rc|1  
AATGTTCAATTTGATCTTTTAAGGATTCAGTCTCTTTCATAAATGTCATTAACCTGT  
>HPV92\_Beta\_27531786\_nt2621\_Genome\_Tile\_rc|1  
CTCCTGTCTTAACAAGTTCCAATGTTCAATTTGATCTTTTAAGGATTCAGTCTCTTTC  
>HPV92\_Beta\_27531786\_nt2681\_Genome\_Tile\_rc|1  
TACTGGCTGATAACCAAGGCGCAATACTCCTCTTTGTCTGGCATAATGAAATAACACCTG  
>HPV92\_Beta\_27531786\_nt2701\_Genome\_Tile\_rc|1  
TCTGAAATAGTTAATGCAGGTACTGGCTGATAACCAAGGCGCAATACTCCTCTTTGTCTG  
>HPV92\_Beta\_27531786\_nt2721\_Genome\_Tile\_rc|1  
TGGCTTCCTTAGCTTTAGCCTCTGAAATAGTTAATGCAGGTACTGGCTGATAACCAAGGC  
>HPV92\_Beta\_27531786\_nt2741\_Genome\_Tile\_rc|1  
TAAATGTAAACCATAGCAATGGCTTCCTTAGCTTTAGCCTCTGAAATAGTTAATGCAGG  
>HPV92\_Beta\_27531786\_nt2761\_Genome\_Tile\_rc|1  
GGTGATCTTTGCAATGCTTCTAAATGTAAACCATAGCAATGGCTTCCTTAGCTTTAGCC

>HPV92\_Beta\_27531786\_nt2781\_Genome\_Tile\_rc|1  
TCCATTTTTCATTTTGTAAAGGTGATCTTTGCAATGCTTCTAAATGTAAAACCATAGCAA  
>HPV92\_Beta\_27531786\_nt2841\_Genome\_Tile\_rc|1  
CCTTTTAAACAATTTTCTGGGGGTGTGCGAAACGTTTCTACACTTGTATTTACTAATG  
>HPV92\_Beta\_27531786\_nt2861\_Genome\_Tile\_rc|1  
TATTTCAATAGTCTTAGGGCCCTTTTAAACAATTTTCTGGGGGTGTGCGAAACGTTTC  
>HPV92\_Beta\_27531786\_nt2901\_Genome\_Tile\_rc|1  
TAGTGTATAACATTGTATTTTCAGGATTGCCATCATACACTATTTCAATAGTCTTAGGGC  
>HPV92\_Beta\_27531786\_nt2921\_Genome\_Tile\_rc|1  
AAAATATATATGTGTCCAAATAGTGTATAACATTGTATTTTCAGGATTGCCATCATACAC  
>HPV92\_Beta\_27531786\_nt2961\_Genome\_Tile\_rc|1  
AATGTCCCTCAGTCTTTTGCCAGTTGCCCTTCGTCATCTTCAAAATATATATGTGTCCAAA  
>HPV92\_Beta\_27531786\_nt2981\_Genome\_Tile\_rc|1  
ATAGGCACCATGATAGTCCAAATGTCCCTCAGTCTTTTGCCAGTTGCCCTTCGTCATCTTC  
>HPV92\_Beta\_27531786\_nt3001\_Genome\_Tile\_rc|1  
TTATTTAATCCATCCATAAAATAGGCACCATGATAGTCCAAATGTCCCTCAGTCTTTTGC  
>HPV92\_Beta\_27531786\_nt3021\_Genome\_Tile\_rc|1  
CAAATCTGATATAGTATTGTTTATTTAATCCATCCATAAAATAGGCACCATGATAGTCCA  
>HPV92\_Beta\_27531786\_nt3041\_Genome\_Tile\_rc|1  
AAATCTGCGTGCGTCTTGAGCAAATCTGATATAGTATTGTTTATTTAATCCATCCATAAA  
>HPV92\_Beta\_27531786\_nt3061\_Genome\_Tile\_rc|1  
TCCCATTTCTCCAGTTTCACTAAATCTGCGTGCGTCTTGAGCAAATCTGATATAGTATTGT  
>HPV92\_Beta\_27531786\_nt3221\_Genome\_Tile\_rc|1  
TTTAGATGGTTGCTTCCGTTGAGTGGGTACAGGGGACTGTCCTCCGGATGTCTGCGAAAG  
>HPV92\_Beta\_27531786\_nt3341\_Genome\_Tile\_rc|1  
TCCTTGATGATCCCGATCTCGATCCTGACCGCGATCGTGATCTCCTCGGTGACGCTTTCGG  
>HPV92\_Beta\_27531786\_nt3421\_Genome\_Tile\_rc|1  
CCCCGACCCCGGCTTCCTTGTCCTTCTCCTTGTCCTCCCGTTCCCGTTCTCCGCGTCTGACT  
>HPV92\_Beta\_27531786\_nt3441\_Genome\_Tile\_rc|1  
TGCTTCTGTCCCGCTCCTTCCCGACCCCGGCTTCCTTGTCCTTCTCCTTGTCCTCCCGTT  
>HPV92\_Beta\_27531786\_nt3581\_Genome\_Tile\_rc|1  
AACAGATTTGGATCTTGACCTCCTGTTGCTGTACCCTCTACGGCCTCTGGAGGCTGCTCT  
>HPV92\_Beta\_27531786\_nt3601\_Genome\_Tile\_rc|1  
GGTGGTATGCCACTTGTGCCAACAGATTTGGATCTTGACCTCCTGTTGCTGTACCCTCTA  
>HPV92\_Beta\_27531786\_nt3741\_Genome\_Tile\_rc|1  
CCCTGTAGCGATAACACTTAAGAGTATTGGCTTGTCTTTCAACAAAATTACTGGGGGAT  
>HPV92\_Beta\_27531786\_nt3761\_Genome\_Tile\_rc|1  
GCCTTTTATACTTTTCTTTAGCCCTGTAGCGATAACACTTAAGAGTATTGGCTTGTCTTTT  
>HPV92\_Beta\_27531786\_nt3781\_Genome\_Tile\_rc|1  
GTACTGAAGCAATCATAATAGCCTTTTACTTTTCTTTAGCCCTGTAGCGATAACACTTA  
>HPV92\_Beta\_27531786\_nt3801\_Genome\_Tile\_rc|1  
CACTGACCCATGACCATGTAGTACTGAAGCAATCATAATAGCCTTTTACTTTTCTTTAG  
>HPV92\_Beta\_27531786\_nt3861\_Genome\_Tile\_rc|1  
GAGATTTACTGGTAAAGCTAATAATCATTTCTAGAGCGTCCTATTCTATCGTTGCTACCTG  
>HPV92\_Beta\_27531786\_nt3921\_Genome\_Tile\_rc|1  
ACCCAAGAGACCAATCAACGCCCTTTGGTAATTTTATAATACTTAAAAACATTTGTCTTT  
>HPV92\_Beta\_27531786\_nt3961\_Genome\_Tile\_rc|1  
AAAAAACTAGAAAGGTTAGTGTGTAAATAGAGTCAAAGCACCCAAGAGACCAATCAACG  
>HPV92\_Beta\_27531786\_nt3981\_Genome\_Tile\_rc|1  
TTGAAACGTATGTGTAGTAAAAAACTAGAAAGGTTAGTGTGTAAATAGAGTCAAAGC  
>HPV92\_Beta\_27531786\_nt4241\_Genome\_Tile\_rc|1  
TTTCCAACCTCTTACACTCGTCCCTTCACCTAATGGCCCATATCCAGTGCTACCACCAGTG  
>HPV92\_Beta\_27531786\_nt4261\_Genome\_Tile\_rc|1  
GCCTAATAACTGTGGGTGTATTTCCAACCTTACACTCGTCCCTTCACCTAATGGCCCAT  
>HPV92\_Beta\_27531786\_nt4321\_Genome\_Tile\_rc|1

GATTGACACTGTCAATAGGTATTAGTTCACTTGGTCCTATAGCCTCAGGCACCAAAGCAG  
>HPV92\_Beta\_27531786\_nt4341\_Genome\_Tile\_rc|1  
AGAAGCACTGGGGTCAATAGGATTGACACTGTCAATAGGTATTAGTTCACTTGGTCCTAT  
>HPV92\_Beta\_27531786\_nt4361\_Genome\_Tile\_rc|1  
TCTGTTAAAGGTATGATAGAAGAAGCACTGGGGTCAATAGGATTGACACTGTCAATAGGT  
>HPV92\_Beta\_27531786\_nt4381\_Genome\_Tile\_rc|1  
AGAGGTCAGGACCTGTTGACTCTGTTAAAGGTATGATAGAAGAAGCACTGGGGTCAATAG  
>HPV92\_Beta\_27531786\_nt4401\_Genome\_Tile\_rc|1  
TGTTTTCTATTTACCTGGTAAGAGGTCAGGACCTGTTGACTCTGTTAAAGGTATGATAGA  
>HPV92\_Beta\_27531786\_nt4461\_Genome\_Tile\_rc|1  
CCCAGTCACCACTGGTGTATCTACTGTAGGTATGTCAGGGGCAGGATGCACCTCTGCAAT  
>HPV92\_Beta\_27531786\_nt4561\_Genome\_Tile\_rc|1  
TGATTTGAAATGCAGGATTGTTATATTGTGTTCTACTAACTCTGTTTCGTGTGGGTGGAC  
>HPV92\_Beta\_27531786\_nt4601\_Genome\_Tile\_rc|1  
GATAGGGACGTTTCCCCCGCACTTGGTGTAGTTTCAGATATGATTTGAAATGCAGGATTG  
>HPV92\_Beta\_27531786\_nt4681\_Genome\_Tile\_rc|1  
CTATTTCAACTACTGATCGCGGAGGTGGGTACCACCTATATATTGTCCACCATCAAATG  
>HPV92\_Beta\_27531786\_nt4701\_Genome\_Tile\_rc|1  
TGAGGGAATTTCTTGTAATTCTATTTCAACTACTGATCGCGGAGGTGGGTACCACCTAT  
>HPV92\_Beta\_27531786\_nt4801\_Genome\_Tile\_rc|1  
ATAAAGCCCTCCGTAATGCTGAGGCCATTTGTTGTGCCTGTCTGACAGGAGTGCTTGTTT  
>HPV92\_Beta\_27531786\_nt4841\_Genome\_Tile\_rc|1  
GGATCTTCCACTTGAACCTGCTGTGTGAACCTTCTATTGTATAAAGCCCTCCGTAATGCT  
>HPV92\_Beta\_27531786\_nt4861\_Genome\_Tile\_rc|1  
AAGGTCTACTATAAAACATTGGATCTTCCACTTGAACCTGCTGTGTGAACCTTCTATTGT  
>HPV92\_Beta\_27531786\_nt4881\_Genome\_Tile\_rc|1  
TTGAAACCTAACTAACCTGGAAGGTCTACTATAAAACATTGGATCTTCCACTTGAACCTG  
>HPV92\_Beta\_27531786\_nt5041\_Genome\_Tile\_rc|1  
CAAGTCTGCTAACCCCTTATATAGCCTGCAGGTGTTTCAGCATAGGTAGGCCTACCAAGTT  
>HPV92\_Beta\_27531786\_nt5061\_Genome\_Tile\_rc|1  
CCTTATAGTAGCTCGTTTGCCAAGTCTGCTAACCCCTTATATAGCCTGCAGGTGTTTCAGC  
>HPV92\_Beta\_27531786\_nt5081\_Genome\_Tile\_rc|1  
ATTGTAGTTCAGACCTGGTCTTATAGTAGCTCGTTTGCCAAGTCTGCTAACCCCTTATA  
>HPV92\_Beta\_27531786\_nt5121\_Genome\_Tile\_rc|1  
AATACTGCTAATATCCCTAAAAAATGTACCTGACCGCTATTGTAGTTCAGACCTGGT  
>HPV92\_Beta\_27531786\_nt5141\_Genome\_Tile\_rc|1  
TCAATAGAAGGTTGAGTATCAATACTGCTAATATCCCTAAAAAATGTACCTGACCGCCT  
>HPV92\_Beta\_27531786\_nt5161\_Genome\_Tile\_rc|1  
GTTCCCCAAGAAGTTGCAGTTCAATAGAAGGTTGAGTATCAATACTGCTAATATCCCTAA  
>HPV92\_Beta\_27531786\_nt5241\_Genome\_Tile\_rc|1  
TAAATTAGGTAACCTCTCCAAATCAATATTTACGAACGTACTTTCCACAGGACCCTGGAC  
>HPV92\_Beta\_27531786\_nt5281\_Genome\_Tile\_rc|1  
CAATAAGTATATCATCAGATTCTAGGTGTACATTTTCCTCTAAATTAGGTAACCTCTCCA  
>HPV92\_Beta\_27531786\_nt5381\_Genome\_Tile\_rc|1  
GTTTCCCTTACAGTTTCAAAGCGAGGTAATGTAACAGTATTTGATCTTCTAGAATTTCCA  
>HPV92\_Beta\_27531786\_nt5401\_Genome\_Tile\_rc|1  
AATCTACAGTATATAAAGAAGTTTCCCTTACAGTTTCAAAGCGAGGTAATGTAACAGTAT  
>HPV92\_Beta\_27531786\_nt5421\_Genome\_Tile\_rc|1  
AGACACATGGAATCCATCTAAATCTACAGTATATAAAGAAGTTTCCCTTACAGTTTCAAA  
>HPV92\_Beta\_27531786\_nt5441\_Genome\_Tile\_rc|1  
TACGCTCTACTCTCAGGATAAGACACATGGAATCCATCTAAATCTACAGTATATAAAGAA  
>HPV92\_Beta\_27531786\_nt5461\_Genome\_Tile\_rc|1  
CTGTAGGAATAACTTCTGGATACGCTCTACTCTCAGGATAAGACACATGGAATCCATCTA  
>HPV92\_Beta\_27531786\_nt5481\_Genome\_Tile\_rc|1  
TGTTGGGGTATTATCTGGTTCTGTAGGAATAACTTCTGGATACGCTCTACTCTCAGGATA

>HPV92\_Beta\_27531786\_nt5641\_Genome\_Tile\_rc|1  
CCTTGCAACCGGTGTTGAAGGGGGTAAGTATACCTTACCATTTGCTGGAAGCCAATAGGA  
>HPV92\_Beta\_27531786\_nt5761\_Genome\_Tile\_rc|1  
ATCATGTGGATCAACTGAGCTTCTCACTTCAAAATAAGGGTGTCCAAGTGTGAGCAGGCG  
>HPV92\_Beta\_27531786\_nt6041\_Genome\_Tile\_rc|1  
TTTGCTTTGGATCAAAAGATGTGTTTACTCTGTCATCCTTTGTTCCAGTATTGTACTTAT  
>HPV92\_Beta\_27531786\_nt6081\_Genome\_Tile\_rc|1  
TCACCTAAGCATGGTGTACATCCTAAAAACAAATAACTGAATTTGCTTTGGATCAAAAGAT  
>HPV92\_Beta\_27531786\_nt6161\_Genome\_Tile\_rc|1  
CAGTGTTTTTTAACTCTAATGGTGGGCATCCCCAGTATCTGGTTGCTTTTCAGCACATG  
>HPV92\_Beta\_27531786\_nt6221\_Genome\_Tile\_rc|1  
ATAAGGCCTTAAATTCATATTACCGAAGCCTATGTCAACCATATCTCCATCAGAGATAA  
>HPV92\_Beta\_27531786\_nt6241\_Genome\_Tile\_rc|1  
TACGTCAGATTTGGTTACTGATAAGGCCTTAAATTCATATTACCGAAGCCTATGTCAAC  
>HPV92\_Beta\_27531786\_nt6261\_Genome\_Tile\_rc|1  
GAGTCTACTATATCCAACTTACGTCAGATTTGGTTACTGATAAGGCCTTAAATTCATA  
>HPV92\_Beta\_27531786\_nt6441\_Genome\_Tile\_rc|1  
GCTGCAGGTAACATAAAGTTATGGTCTTCATTTACAAGTGCATCTGGGATGGTATCACCC  
>HPV92\_Beta\_27531786\_nt6461\_Genome\_Tile\_rc|1  
TTCTAGACTGGTCACTGGATGCTGCAGGTAACATAAAGTTATGGTCTTCATTTACAAGT  
>HPV92\_Beta\_27531786\_nt6481\_Genome\_Tile\_rc|1  
GATAGAAGTGGCAATTTGACTTCTAGACTGGTCACTGGATGCTGCAGGTAACATAAAGTT  
>HPV92\_Beta\_27531786\_nt6641\_Genome\_Tile\_rc|1  
TATTAAAGTTAGTATTCTGTTATTATCACAACTGTCAGAAACAGTTCATTACTCCAGC  
>HPV92\_Beta\_27531786\_nt6661\_Genome\_Tile\_rc|1  
ACCTTCCTTAGGGACACTAATATTAAGTTAGTATTCTGTTATTATCACAACTGTCAG  
>HPV92\_Beta\_27531786\_nt6681\_Genome\_Tile\_rc|1  
TCATAGTCGGTTATTTGACCACCTTCCTTAGGGACACTAATATTAAGTTAGTATTCTG  
>HPV92\_Beta\_27531786\_nt6701\_Genome\_Tile\_rc|1  
ATTCTCTAATCTTTTGTGAATCATAGTCGGTTATTTGACCACCTTCCTTAGGGACACTAA  
>HPV92\_Beta\_27531786\_nt6721\_Genome\_Tile\_rc|1  
TTCTTCAACATGTCTAGTGTATTCTCTAATCTTTTGTGAATCATAGTCGGTTATTTGACC  
>HPV92\_Beta\_27531786\_nt6741\_Genome\_Tile\_rc|1  
AATATTAGTGATATTTTCATATTCTTCAACATGTCTAGTGTATTCTCTAATCTTTTGTGAA  
>HPV92\_Beta\_27531786\_nt7061\_Genome\_Tile\_rc|1  
TAAGACCATTAAACAGATGTATTAGTTAATCCAGCTTGAAATAAAAATTTCTACCCAATG  
>HPV92\_Beta\_27531786\_nt7081\_Genome\_Tile\_rc|1  
AGAAGTGTCTTAGTTCTTTTAAAGACCATTAAACAGATGTATTAGTTAATCCAGCTTGAAA  
>HPV92\_Beta\_27531786\_nt7101\_Genome\_Tile\_rc|1  
TTTCGTTTAGTACCTCTTTGAGAACTGCTTCTAGTTCTTTTAAAGACCATTAAACAGATGTA  
>HPV92\_Beta\_27531786\_nt7121\_Genome\_Tile\_rc|1  
CGTTTTAGTTACTTTTTCTTTTTCGTTTAGTACCTCTTTGAGAACTGCTTCTAGTTCTTT  
>HPV92\_Beta\_27531786\_nt7141\_Genome\_Tile\_rc|1  
TTTCAATAAAGAATACTGACCGTTTTAGTTACTTTTTCTTTTTCGTTTAGTACCTCTTTG  
>HPV92\_Beta\_27531786\_nt7201\_Genome\_Tile\_rc|1  
TGAGTTAGTCAGAATAGATAATAATCATTACTCATAACACATGAGTTCCAAAAATTTTAT  
>HPV92\_Beta\_27531786\_nt7241\_Genome\_Tile\_rc|1  
CAGCGTTTATATTGAATACACCGGGCGCGGTTAACATGTTTGAGTTAGTCAGAATAGATA  
>HPV92\_Beta\_27531786\_nt7261\_Genome\_Tile\_rc|1  
TCCTTGACAACCTGTACCATCAGCGTTTATATTGAATACACCGGGCGCGGTTAACATGTT  
>HPV92\_Beta\_27531786\_nt7281\_Genome\_Tile\_rc|1  
TGTAGTTTCAGACTGCCAAGTTCCTTGACAACCTTGTTACCATCAGCGTTTATATTGAATACA  
>HPV92\_Beta\_27531786\_nt7301\_Genome\_Tile\_rc|1  
CTTCCAGGTGTTGGCACCCTGTAGTTTCAGACTGCCAAGTTCCTTGACAACCTTGTTACCAT  
>HPV49\_Beta\_9627363\_nt0001\_Genome\_Tile\_rc|1

TTATCGTTCTGGTGTGCTGCCAAAGAGTTGGCGCCAAAATGTAGCTGGAACGAATGTGG  
>HPV49\_Beta\_9627363\_nt0081\_Genome\_Tile\_rc|1  
TATATCTGTTTCAAGATTGTTGTTAACAACCACAAGAGATGACTAAGTATAATGTGACCG  
>HPV49\_Beta\_9627363\_nt0121\_Genome\_Tile\_rc|1  
TCCAAGAATAAAGAAAGTACAGCACGCAAGCGGTTACATGTATATCTGTTTCAAGATTGT  
>HPV49\_Beta\_9627363\_nt0221\_Genome\_Tile\_rc|1  
AAAATTACAAGGAAGCAAAACTTCCCAAATAGGTATATTTAAGTGGTGGGCTAGCTCACA  
>HPV49\_Beta\_9627363\_nt0241\_Genome\_Tile\_rc|1  
TATGTTAGAAAACCCCGTGCAAAAATTACAAGGAAGCAAACTTCCCAAATAGGTATATTT  
>HPV49\_Beta\_9627363\_nt0261\_Genome\_Tile\_rc|1  
CAAATTCTAACAACTCCTGATATGTTAGAAAACCCCGTGCAAAAATTACAAGGAAGCAAAA  
>HPV49\_Beta\_9627363\_nt0301\_Genome\_Tile\_rc|1  
ACAAATCCGTCTTTCCACAGCAAATTAAGTCTTTATAGTCAAATTCTAACAACTCCTGA  
>HPV49\_Beta\_9627363\_nt0321\_Genome\_Tile\_rc|1  
AAGCTGCACAACAACCAAGACAAATCCGTCTTTCCACAGCAAATTAAGTCTTTATAGT  
>HPV49\_Beta\_9627363\_nt0341\_Genome\_Tile\_rc|1  
ATATGCTGATCTATAGGCACAAGCTGCACAACAACCAAGACAAATCCGTCTTTCCACAG  
>HPV49\_Beta\_9627363\_nt0381\_Genome\_Tile\_rc|1  
TGCCTACGACAATTTCTTGGTGATAATTAGTAAACTCGTGATATGCTGATCTATAGGCAC  
>HPV49\_Beta\_9627363\_nt0401\_Genome\_Tile\_rc|1  
TGCTCGTCCCTTCTATTTTCGATGCCTACGACAATTTCTTGGTGATAATTAGTAAACTCGTG  
>HPV49\_Beta\_9627363\_nt0421\_Genome\_Tile\_rc|1  
ATCTCAGCAATATTAGCCGCTGCTCGTCCCTTCTATTTTCGATGCCTACGACAATTTCTTGG  
>HPV49\_Beta\_9627363\_nt0441\_Genome\_Tile\_rc|1  
AAATGAGACATCTGACTACTATCTCAGCAATATTAGCCGCTGCTCGTCCCTTCTATTTTCGA  
>HPV49\_Beta\_9627363\_nt0481\_Genome\_Tile\_rc|1  
CAAATATCAAGCTTTTCCAACAAATCTAGCCTCTTAAGGCAAATGAGACATCTGACTACT  
>HPV49\_Beta\_9627363\_nt0801\_Genome\_Tile\_rc|1  
AGCAGTTCTTGAAACTTCTAATAGCAGCGTCAGTGGCTAACACGAAGACTCGCAGTCTG  
>HPV49\_Beta\_9627363\_nt0821\_Genome\_Tile\_rc|1  
AGAATTGCAGTTCCTCCAGAAGCAGTTCTTGAAACTTCTAATAGCAGCGTCAGTGGCTA  
>HPV49\_Beta\_9627363\_nt1001\_Genome\_Tile\_rc|1  
CTCATCATTTAACAAATTTGAAATATTGGACTTTGGGCTTTTCATCAAATAATTGTTCCAA  
>HPV49\_Beta\_9627363\_nt1581\_Genome\_Tile\_rc|1  
TCTTTGCATGATTAAAACACAGTAAATATAAAGTCATAATCCCATTTATATTTATCCACA  
>HPV49\_Beta\_9627363\_nt1621\_Genome\_Tile\_rc|1  
TCCAGTATTGACATAAGCAATCTACCAACAGTTTCTCTACTCTTTGCATGATTAAAACAC  
>HPV49\_Beta\_9627363\_nt2121\_Genome\_Tile\_rc|1  
TAAACTGTTTAAATGCATCCAGAAATATTATAAAGTTTATTTCTTGAAATCTTATAAACT  
>HPV49\_Beta\_9627363\_nt2141\_Genome\_Tile\_rc|1  
TTTTTTAGGTTTGCCATGTATAAACTGTTTAAATGCATCCAGAAATATTATAAAGTTTAT  
>HPV49\_Beta\_9627363\_nt2241\_Genome\_Tile\_rc|1  
CATTTACAAATGAAATTACCTTGCCCTTTTAAAACTTTTAATAATGACATAGCAAACATTG  
>HPV49\_Beta\_9627363\_nt2441\_Genome\_Tile\_rc|1  
AATATTATAATTTGAAGTTATTAACAATGGTGGGAACCTAATTTGCATAGGGGTTTTATG  
>HPV49\_Beta\_9627363\_nt2501\_Genome\_Tile\_rc|1  
ATGTTTAAATTCAAATATTGCAATTCTACTGTACAAAACTTATATTTATCATTAGCTTT  
>HPV49\_Beta\_9627363\_nt2781\_Genome\_Tile\_rc|1  
TCTCATTATGCTGTGTTTACGTGCAAAAAATAATAAAGCTTGTTTCCTGTCTTAACAGTTT  
>HPV49\_Beta\_9627363\_nt2801\_Genome\_Tile\_rc|1  
GGTACGGGTTGATACCCAGTCTCATTATGCTGTGTTTACGTGCAAAAAATAATAAAGCT  
>HPV49\_Beta\_9627363\_nt2841\_Genome\_Tile\_rc|1  
AATAGCTTGTGTTGGCTTTGGTTTCAGATACTGCCATCGGAGGTACGGGTTGATACCCAG  
>HPV49\_Beta\_9627363\_nt2861\_Genome\_Tile\_rc|1  
TGCAAAGTTAGCATCATGCCAATAGCTTGTTTGGCTTTGGTTTCAGATACTGCCATCGGA

>HPV49\_Beta\_9627363\_nt2981\_Genome\_Tile\_rc|1  
ATAACTTCTATATTATAAGGACCTTTTTTAAAGCACTGTGCTGGTGGTGCATTGTATGTT  
>HPV49\_Beta\_9627363\_nt3121\_Genome\_Tile\_rc|1  
GTTTGATAGTTCATCCTTATAATATGCACCTGCATAATCCACCTCACCTTGCACCTTTT  
>HPV49\_Beta\_9627363\_nt3141\_Genome\_Tile\_rc|1  
AGCGAAGGTAACATAATACTGTTTGATAGTTCATCCTTATAATATGCACCTGCATAATC  
>HPV49\_Beta\_9627363\_nt3641\_Genome\_Tile\_rc|1  
CTCCCTCTGCCCTGCGGGTCTCTTGGGGCTGGAATCTCTGGAGGTTGTGACAGATCCT  
>HPV49\_Beta\_9627363\_nt4041\_Genome\_Tile\_rc|1  
CTTCATAATTTTAACATACTGTGATCTAGTGTCTGTTTGAAGTAAAACTTAAAAGCATACG  
>HPV49\_Beta\_9627363\_nt4161\_Genome\_Tile\_rc|1  
AAAAAGCAATATAAAAATGTTAAAAGATTAATGTGTTAGTAGTGCAAGCACCGTTAGTAT  
>HPV49\_Beta\_9627363\_nt4181\_Genome\_Tile\_rc|1  
CGCACCATTATATAAAAATAAAAAGCAATATAAAAATGTTAAAAGATTAATGTGTTAGT  
>HPV49\_Beta\_9627363\_nt4481\_Genome\_Tile\_rc|1  
GGAATGATATCCGCCGACCAATAGCCTCAGGGAGTATACCTGGACGAACAACACTTGA  
>HPV49\_Beta\_9627363\_nt4701\_Genome\_Tile\_rc|1  
AATTCTGGTGCGAGTGGGTGGTGTGGGTTTCAGAGGCAACCTCCAATACAGCACTGGAGCC  
>HPV49\_Beta\_9627363\_nt4721\_Genome\_Tile\_rc|1  
TTATGGTACTGTGTTCTGGAAATTCTGGTGCGAGTGGGTGGTGTGGGTTTCAGAGGCAACC  
>HPV49\_Beta\_9627363\_nt4741\_Genome\_Tile\_rc|1  
TTAATATTTGAAAAGAGGGATTATGGTACTGTGTTCTGGAAATTCTGGTGCGAGTGGGTG  
>HPV49\_Beta\_9627363\_nt4821\_Genome\_Tile\_rc|1  
TATTGGTTGACCACCAGAACCCTAGTAACAACAACATGATCAGTTAATGCAGATTCTCC  
>HPV49\_Beta\_9627363\_nt4841\_Genome\_Tile\_rc|1  
TCAACTGGTGTAACCTCCACCTATTGGTTGACCACCAGAACCCTAGTAACAACAACATGA  
>HPV49\_Beta\_9627363\_nt4861\_Genome\_Tile\_rc|1  
GAAGTTCTTGTAATTCTATTTCAACTGGTGTAACCTCCACCTATTGGTTGACCACCAGAAC  
>HPV49\_Beta\_9627363\_nt5021\_Genome\_Tile\_rc|1  
TGTTGTAAGAATAATGGATCCTGGACATTTACTTGTGAGTAAGTCGCCTATTATATAGT  
>HPV49\_Beta\_9627363\_nt5181\_Genome\_Tile\_rc|1  
CTGTGGTGTTCAGAGTAAAGAGGGCGGCTTAATTTTGCTATATCTAAAAAGTCTCTGTC  
>HPV49\_Beta\_9627363\_nt5201\_Genome\_Tile\_rc|1  
CGGCTTACCCTGACATATCCCTGTGGTGTTTCAGAGTAAAGAGGGCGGCTTAATTTTGCT  
>HPV49\_Beta\_9627363\_nt5221\_Genome\_Tile\_rc|1  
TAGAAGCCCTATTACCTAAGCGGCTTACCCTGACATATCCCTGTGGTGTTTCAGAGTAAA  
>HPV49\_Beta\_9627363\_nt5241\_Genome\_Tile\_rc|1  
AGCTCCACTACGTGTTCTAATAGAAGCCCTATTACCTAAGCGGCTTACCCTGACATATCC  
>HPV49\_Beta\_9627363\_nt5281\_Genome\_Tile\_rc|1  
TGCTAAGATCTGTATAAAAATGCACTTGAGCCCCTACTGTAGCTCCACTACGTGTTCTAA  
>HPV49\_Beta\_9627363\_nt5301\_Genome\_Tile\_rc|1  
AGACTCCTCTGCATCGATTGTGCTAAGATCTGTATAAAAATGCACTTGAGCCCCTACTGT  
>HPV49\_Beta\_9627363\_nt5321\_Genome\_Tile\_rc|1  
CCTAATAGTGATAACTCTATAGACTCCTCTGCATCGATTGTGCTAAGATCTGTATAAAAA  
>HPV49\_Beta\_9627363\_nt5421\_Genome\_Tile\_rc|1  
TGGGTCTACTTCTATTACTTGAGGCAGTTCCTGAACATTTAAATCTACAAATGAGCTTTC  
>HPV49\_Beta\_9627363\_nt5441\_Genome\_Tile\_rc|1  
TCAGAGTGGAAAGTAGGTTCTGGGTCTACTTCTATTACTTGAGGCAGTTCCTGAACATTT  
>HPV49\_Beta\_9627363\_nt5461\_Genome\_Tile\_rc|1  
GCTCATCCAGTAGCAAATCATCAGAGTGGAAGTAGGTTCTGGGTCTACTTCTATTACTT  
>HPV49\_Beta\_9627363\_nt5521\_Genome\_Tile\_rc|1  
ATGTGGTAGAACGCCTGCCACTACCATAAACTAACTGGGAGCCAGAAAAATCTTCATTTT  
>HPV49\_Beta\_9627363\_nt5541\_Genome\_Tile\_rc|1  
AGAGAAGCGGGGTACAGTAAATGTGGTAGAACGCCTGCCACTACCATAAACTAACTGGGA  
>HPV49\_Beta\_9627363\_nt5561\_Genome\_Tile\_rc|1

AAGGTATCAGATCTGGGAGTAGAGAAGCGGGGTACAGTAAATGTGGTAGAACGCCTGCCA  
>HPV49\_Beta\_9627363\_nt5581\_Genome\_Tile\_rc|1  
CTTCCAAATCTTGTACATAAAAGGTATCAGATCTGGGAGTAGAGAAGCGGGGTACAGTAA  
>HPV49\_Beta\_9627363\_nt5601\_Genome\_Tile\_rc|1  
AGGATATGACACAGCATAACCTTCCAAATCTTGTACATAAAAGGTATCAGATCTGGGAGT  
>HPV49\_Beta\_9627363\_nt5621\_Genome\_Tile\_rc|1  
TCTGGATAATTCCTTCGTTTCAGGATATGACACAGCATAACCTTCCAAATCTTGTACATAA  
>HPV49\_Beta\_9627363\_nt5661\_Genome\_Tile\_rc|1  
AATTATTACAGTTGGCAAATCGGGTTGAGGATAAATAATTTCTGGATAATTCCTTCGTTTC  
>HPV49\_Beta\_9627363\_nt5681\_Genome\_Tile\_rc|1  
CCAGAGGTATCTGCAGTATGAATTATTACAGTTGGCAAATCGGGTTGAGGATAAATAATT  
>HPV49\_Beta\_9627363\_nt5701\_Genome\_Tile\_rc|1  
TTGGATGTAAATAGAAGTCCCCAGAGGTATCTGCAGTATGAATTATTACAGTTGGCAAAT  
>HPV34\_Alpha\_9627334\_nt0061\_Genome\_Tile\_rc|1  
CAGGATTGGGAAAAAACATTTCCCAATCTGTCCAGCAGTGTACTGCAGCACTTATATATG  
>HPV34\_Alpha\_9627334\_nt0281\_Genome\_Tile\_rc|1  
TATCTTCTATATTGTCTAACCTTTGAGTAAACAGTAAACACGGTTGACATACCCCAAGT  
>HPV34\_Alpha\_9627334\_nt0301\_Genome\_Tile\_rc|1  
GTCCATACACTGATTGGTTATATCTTCTATATTGTCTAACCTTTGAGTAAACAGTAAAC  
>HPV34\_Alpha\_9627334\_nt0321\_Genome\_Tile\_rc|1  
AGTTAAATTCTCTAACGTCCGTCCATACACTGATTGGTTATATCTTCTATATTGTCTAAC  
>HPV34\_Alpha\_9627334\_nt1141\_Genome\_Tile\_rc|1  
GTGTCCCTTATCGTCAATATATGTGGACTACGCTGTTTGTGTTTCAATTCATGTCTTTTA  
>HPV34\_Alpha\_9627334\_nt1161\_Genome\_Tile\_rc|1  
GGTGTGTAGATGTAGTATTAGTGTCCCTTATCGTCAATATATGTGGACTACGCTGTTTGT  
>HPV34\_Alpha\_9627334\_nt1181\_Genome\_Tile\_rc|1  
GTCTTGTTCCTCACACAATAGGTGTGTAGATGTAGTATTAGTGTCCCTTATCGTCAATAT  
>HPV34\_Alpha\_9627334\_nt1301\_Genome\_Tile\_rc|1  
TGTTTTCCCTGGCGACGCCATTTGGCTGCCGTTGTTACTACTGCTAGTACTTTGTAAACA  
>HPV34\_Alpha\_9627334\_nt1401\_Genome\_Tile\_rc|1  
TTGCCTTTACATTACTACTTTTTTAATATGTTTGTAAATGTCCGTTATAGGTGTGCTTTCCA  
>HPV34\_Alpha\_9627334\_nt1421\_Genome\_Tile\_rc|1  
TTTAAATTTTGCTAATAATGTTGCCTTTACATTACTACTTTTTTAATATGTTTGTAAATGTC  
>HPV34\_Alpha\_9627334\_nt1581\_Genome\_Tile\_rc|1  
ATTGTAGATGTATGTATAGGCAATATTGGGTTAGTAATGATTTTAACTTTCTGCCAATG  
>HPV34\_Alpha\_9627334\_nt1621\_Genome\_Tile\_rc|1  
GCTAACAATAATACTATTATACCCACGAACATGTTAAACATTGTAGATGTATGTATAGG  
>HPV34\_Alpha\_9627334\_nt2161\_Genome\_Tile\_rc|1  
GCAATTAAAAACGGTACAAATTCAACCTGCTGATATCTTAAAAATTGCACAATATGTTTC  
>HPV34\_Alpha\_9627334\_nt3121\_Genome\_Tile\_rc|1  
TCACTTTATACCACTTGCCTTCCAACCAATAATACACAAATGTCCATACCACATATTGCA  
>HPV34\_Alpha\_9627334\_nt3141\_Genome\_Tile\_rc|1  
ATTATAATCTACATGGCTACTCACTTTATACCACTTGCCTTCCAACCAATAATACACAAA  
>HPV34\_Alpha\_9627334\_nt3161\_Genome\_Tile\_rc|1  
TGTGTTTCATAATATATACCAATTATAATCTACATGGCTACTCACTTTATACCACTTGCCT  
>HPV34\_Alpha\_9627334\_nt3221\_Genome\_Tile\_rc|1  
TTAACCCCATATCGTTTTGCATCTCTGTCAAATTTGTGTATAATATACCTTTTCATTGTCC  
>HPV34\_Alpha\_9627334\_nt3441\_Genome\_Tile\_rc|1  
TGAGTCTGTTGTGGGCTGTAGGTTATGTACAAAGTCCAAGGGCCCTCGTCTGGGTCACA  
>HPV34\_Alpha\_9627334\_nt3661\_Genome\_Tile\_rc|1  
CACATTGTAAAAATTGTTTTTGTGGGATGTACTGGAAAACATAAATGTAATTACACCAC  
>HPV34\_Alpha\_9627334\_nt3701\_Genome\_Tile\_rc|1  
ATATACCCTGATGACACTGATATAGTTGGTGGTATTTTAGCACATTGTAAAAATTGTTTT  
>HPV34\_Alpha\_9627334\_nt3761\_Genome\_Tile\_rc|1  
TTATACAGTATACCAATGTATACAATTGTAACCAATGTTACATATTTGTGTTATATGGAC



>HPV34\_Alpha\_9627334\_nt3781\_Genome\_Tile\_rc|1  
ATATAAAAAATGATCATGACATTATACAGTATACCAATGTATACAATTGTAACCAATGTTA  
>HPV34\_Alpha\_9627334\_nt3901\_Genome\_Tile\_rc|1  
ATTGGGACACATGTAAAAAAGTAATTATAATCAAAAGCAATAACCATGCATAAACACACA  
>HPV34\_Alpha\_9627334\_nt3921\_Genome\_Tile\_rc|1  
TATATATACTTTTAAACAGGGATTGGGACACATGTAAAAAAGTAATTATAATCAAAAGCAA  
>HPV34\_Alpha\_9627334\_nt4341\_Genome\_Tile\_rc|1  
ATGTAATAACAGGAGGTCTGGTAGGTTGCAAAGGAATTTCAACTGGTCTAGATGGAGTAG  
>HPV34\_Alpha\_9627334\_nt4441\_Genome\_Tile\_rc|1  
GAACTAGAAGGCACTATGGAGGTAGGACCTGGCACACCAGCTTCAATAAAACTTGACTCC  
>HPV34\_Alpha\_9627334\_nt5141\_Genome\_Tile\_rc|1  
ATCATATAGCCCATCATTAATGCCATTAGCATCTGTTACAGTAGCAGATGCAGAAGGCAG  
>HPV34\_Alpha\_9627334\_nt5161\_Genome\_Tile\_rc|1  
ACATTATTATCTAACAATACATCATATAGCCCATCATTAATGCCATTAGCATCTGTTACA  
>HPV34\_Alpha\_9627334\_nt5201\_Genome\_Tile\_rc|1  
TGTGTTTGTACCAGTAGGTGTTTCCACTTCAGTAATATCTACATTATTATCTAACAATAC  
>HPV34\_Alpha\_9627334\_nt5241\_Genome\_Tile\_rc|1  
TTGCAGTTGTAGTGGAAATCTCACTTGCAAAAACACTTTGTGTGTTTGTACCAGTAGGTG  
>HPV34\_Alpha\_9627334\_nt5261\_Genome\_Tile\_rc|1  
ATTTAAAGGAATAGTGGTATTTGCAGTTGTAGTGGAAATCTCACTTGCAAAAACACTTTG  
>HPV34\_Alpha\_9627334\_nt5341\_Genome\_Tile\_rc|1  
GGTACAGTTGGGGTAAAAATGGTTTCTGCAGTAGGTACAGGTAAAGCAATATCAGGGCCA  
>HPV34\_Alpha\_9627334\_nt5421\_Genome\_Tile\_rc|1  
GTTTGCCTGGAATGACATACAAGCTAGGATGCAATATAAAATCGGACCCATATATATATA  
>HPV34\_Alpha\_9627334\_nt5881\_Genome\_Tile\_rc|1  
ACTCCCTACTATCTGCTATGTTTCCACCAATATATTTTGCAGCATTTTCAGTATCCTCAA  
>HPV34\_Alpha\_9627334\_nt5901\_Genome\_Tile\_rc|1  
TTTATAATCTACTGACATACACTCCCTACTATCTGCTATGTTTCCACCAATATATTTTGC  
>HPV34\_Alpha\_9627334\_nt6541\_Genome\_Tile\_rc|1  
GTCTGAGGTATTCCTTAAATTACTGTTTGCATATGGTGCAGTTGTACTTGTGGATTGTG  
>HPV34\_Alpha\_9627334\_nt7061\_Genome\_Tile\_rc|1  
CAATAATACATACATTACATAACATATACAAACACACAATACACATACACAAACATATAC  
>HPV34\_Alpha\_9627334\_nt7081\_Genome\_Tile\_rc|1  
CCACACCACATACAACAATAACAATAACATACATTACATAACATATACAAACACACAAT  
>HPV34\_Alpha\_9627334\_nt7301\_Genome\_Tile\_rc|1  
ACCTTTGTGCTAAAACAGCACAAACAGACCAAACATGTTATAGTATAGGCAACCGAAAG  
>HPV34\_Alpha\_9627334\_nt7321\_Genome\_Tile\_rc|1  
AGGAAGCCAAAACACATTAAACCTTTGTGCTAAAACAGCACAAACAGACCAAACATGTT  
>HPV34\_Alpha\_9627334\_nt7401\_Genome\_Tile\_rc|1  
GTGTATGACCTTGCGTAGGATGAAACATAAGCAGGAAGCATGTTAATCCTAAGTGCTTGA  
>HPV34\_Alpha\_9627334\_nt7601\_Genome\_Tile\_rc|1  
AAAATGAGTAAGCACTGCTTAGTCAGTTTCAACAATTACCTGGCATGTAAAATACAATG  
>HPV34\_Alpha\_9627334\_nt7621\_Genome\_Tile\_rc|1  
CGGTTTAAACAGTCCAGGTGCAAAATGAGTAAGCACTGCTTAGTCAGTTTCAACAATTAC  
>HPV34\_Alpha\_9627334\_nt7661\_Genome\_Tile\_rc|1  
TTATAATTATAAAAGGGTTGGTACACTGTGTGATCCAAAACGGTTTAAACAGTCCAGGTGC  
>HPV32\_Alpha\_9627327\_nt0181\_Genome\_Tile\_rc|1  
GATATGCATACGCTTCAGCACTGGTTAAGTGGTTTTTACACCAAATACAGCAGATTTGTA  
>HPV32\_Alpha\_9627327\_nt0201\_Genome\_Tile\_rc|1  
TACGTGCAAAATCTTTAAAATGATATGCATACGCTTCAGCACTGGTTAAGTGGTTTTTACA  
>HPV32\_Alpha\_9627327\_nt0221\_Genome\_Tile\_rc|1  
GGAAAGCCTTTCTTCCACACTACGTGCAAAATCTTTAAAATGATATGCATACGCTTCAGCA  
>HPV32\_Alpha\_9627327\_nt0261\_Genome\_Tile\_rc|1  
TTTAGAATAAAATTCTAAGCAGAAGGCACAGGCGGCATATGGAAAGCCTTTCTTCCACAC  
>HPV32\_Alpha\_9627327\_nt0361\_Genome\_Tile\_rc|1

ATATAGCACAGCGAATTATTTGTTCTTCCAACAGTAGTCCTGTTTCTTGTCTACTGTAT  
>HPV32\_Alpha\_9627327\_nt0401\_Genome\_Tile\_rc|1  
ATATGATGATCTTTCTCACTTGGCGATAAAGGCTTTTGACATATAGCACAGCGAATTATT  
>HPV32\_Alpha\_9627327\_nt0421\_Genome\_Tile\_rc|1  
TGAAATGCCGTCCGTTATAAATATGATGATCTTTCTCACTTGGCGATAAAGGCTTTTGAC  
>HPV32\_Alpha\_9627327\_nt0441\_Genome\_Tile\_rc|1  
CCACCTATTTAAAATGAATCTGAAATGCCGTCCGTTATAAATATGATGATCTTTCTCACT  
>HPV32\_Alpha\_9627327\_nt0521\_Genome\_Tile\_rc|1  
TGGCAGGTCATACAAAATAATGTCCTTTAGCGTTGGTGCGTTTCCACGCATTATTCTCTG  
>HPV32\_Alpha\_9627327\_nt0961\_Genome\_Tile\_rc|1  
AGGTATTATTCTGCTGTCGCTACAAAATCTACGAGGTCCAACCCGCTGTCCTCTACATT  
>HPV32\_Alpha\_9627327\_nt1001\_Genome\_Tile\_rc|1  
GTTGCCTATTTAATAATGCCTGCGCCTTTAATTGATTTGTAGGTATTATTCTGCTGTCGT  
>HPV32\_Alpha\_9627327\_nt1681\_Genome\_Tile\_rc|1  
TTGATTAGCAGGTATATTTAATAGTTTGACATTCCTTTAGACACTGTGGTGCGATTCTT  
>HPV32\_Alpha\_9627327\_nt2081\_Genome\_Tile\_rc|1  
CACCATTATCGCCAGTTCTTTCACTTCTATGTTTAATCCACTGTGGCATTGACATACGTT  
>HPV32\_Alpha\_9627327\_nt2781\_Genome\_Tile\_rc|1  
CTGCTTCTATGCGTAAACACTTCCAGTGCTGCACATGTTTTTCTAAATGTTTACTATCTT  
>HPV32\_Alpha\_9627327\_nt2821\_Genome\_Tile\_rc|1  
ACTTGTGCATAGCCATTTACGAGCCTTAAATAATAAGGCTGCTTCTATGCGTAAACAC  
>HPV32\_Alpha\_9627327\_nt3341\_Genome\_Tile\_rc|1  
GGTGTGTATAGGTCGGTGGTTGTACCAATTCAGTAAGTCCAGAAGAGGATACCTCTGC  
>HPV32\_Alpha\_9627327\_nt3421\_Genome\_Tile\_rc|1  
GGGGTGGGGTCTTTGTATAATATTCCGTCTGTGCCGTCTGGGTGCGAGTTACTCCTTGTG  
>HPV32\_Alpha\_9627327\_nt3521\_Genome\_Tile\_rc|1  
CGATCCGGGGTCCACGGGTACGTTTGTGACGCCGTAGTGCTGCAGGTGCTTTGTTGGTGG  
>HPV32\_Alpha\_9627327\_nt3541\_Genome\_Tile\_rc|1  
TTGTCAGATGTGACCCTTTGCGATCCGGGGTCCACGGGTACGTTTGTGACGCCGTAGTGC  
>HPV32\_Alpha\_9627327\_nt3581\_Genome\_Tile\_rc|1  
AGTCTGATTTCCACACGGGTTCCGTCGCTGGTTATTGTTATTGTCAGATGTGACCCTTTG  
>HPV32\_Alpha\_9627327\_nt3661\_Genome\_Tile\_rc|1  
AAGTGAGAACAATTTTTCTTTAACCTCCACCTTAAACACTTTAGGCAATTAGGATCACCT  
>HPV32\_Alpha\_9627327\_nt3681\_Genome\_Tile\_rc|1  
TGGATGACACTTGAGTAAATAAGTGAGAACAATTTTTCTTTAACCTCCACCTTAAACACT  
>HPV32\_Alpha\_9627327\_nt3701\_Genome\_Tile\_rc|1  
TTTTTCTGTCAAGTGCCATGTGGATGACACTTGAGTAAATAAGTGAGAACAATTTTTCTT  
>HPV32\_Alpha\_9627327\_nt3721\_Genome\_Tile\_rc|1  
TTTGAGTCAAGTGTATAGTCTTTTTCTGTGTCAGGTGCCATGTGGATGACACTTGAGTAAAT  
>HPV32\_Alpha\_9627327\_nt3761\_Genome\_Tile\_rc|1  
TTGTTCTCATTATAATAATGAATTGTTATTATACCATCCTTTGAGTCACGTGTATAGTC  
>HPV32\_Alpha\_9627327\_nt3781\_Genome\_Tile\_rc|1  
GTACTTAAAACTTATCTCGTTGTTCCCTCATTATAATAATGAATTGTTATTATACCATCC  
>HPV32\_Alpha\_9627327\_nt3801\_Genome\_Tile\_rc|1  
TACCAGGAGGAAGTTTTACAGTACTTAAAACTTATCTCGTTGTTCCCTCATTATAATAAT  
>HPV32\_Alpha\_9627327\_nt3821\_Genome\_Tile\_rc|1  
GTACCCAATGCAAGATTTAATACCAGGAGGAAGTTTTACAGTACTTAAAACTTATCTCG  
>HPV32\_Alpha\_9627327\_nt3841\_Genome\_Tile\_rc|1  
ATAAATTGTAACATTGACATGTACCCAATGCAAGATTTAATACCAGGAGGAAGTTTTACA  
>HPV32\_Alpha\_9627327\_nt3861\_Genome\_Tile\_rc|1  
TGTACATATGTACACACTACATAAATTGTAACATTGACATGTACCCAATGCAAGATTTAA  
>HPV32\_Alpha\_9627327\_nt3881\_Genome\_Tile\_rc|1  
AATGTTCCCCCTATATATGTTTGTACATATGTACACACTACATAAATTGTAACATTGACAT  
>HPV32\_Alpha\_9627327\_nt3901\_Genome\_Tile\_rc|1  
CACAATAGTGGACTCACAGTAATGTTCCCTATATATGTTTGTACATATGTACACACTAC

>HPV32\_Alpha\_9627327\_nt4081\_Genome\_Tile\_rc|1  
AAAAAAAAATTGCACAGATGTTAGTAGCTGCAACCAGGACAATAGTACTAATATTAGATAG  
>HPV32\_Alpha\_9627327\_nt4101\_Genome\_Tile\_rc|1  
CAACAACAAGCAAAGCTAAAAAAAAAAATTGCACAGATGTTAGTAGCTGCAACCAGGACA  
>HPV32\_Alpha\_9627327\_nt4121\_Genome\_Tile\_rc|1  
TAGTAAAAAGGCAGGAAACACAACAACAAGCAAAGCTAAAAAAAAAAATTGCACAGATGT  
>HPV32\_Alpha\_9627327\_nt4141\_Genome\_Tile\_rc|1  
GCAAAGTGTATTAATAGGGTTAGTAAAAAGGCAGGAAACACAACAACAAGCAAAGCTAAA  
>HPV32\_Alpha\_9627327\_nt4181\_Genome\_Tile\_rc|1  
AGCTATACTATTGTATGTACACCTTCTACATTAATGTAGTGCAAAGTGTATTAATAGGGT  
>HPV32\_Alpha\_9627327\_nt4221\_Genome\_Tile\_rc|1  
TGTACAATTATTGTGTATACCATGCACACCACACACACAGCTATACTATTGTATGTAC  
>HPV32\_Alpha\_9627327\_nt4241\_Genome\_Tile\_rc|1  
ATGTACCATATTATCACGTATGTACAATTATTGTGTATACCATGCACACCACACACACAC  
>HPV32\_Alpha\_9627327\_nt4301\_Genome\_Tile\_rc|1  
AATAAACACTGTGGCTAAAAACCACAGCAGCAGCCACACATCGCCATTTTCTAAAGTACA  
>HPV32\_Alpha\_9627327\_nt4321\_Genome\_Tile\_rc|1  
AACAACAGTACTAATATACAAATAAACACTGTGGCTAAAAACCACAGCAGCAGCCACACA  
>HPV32\_Alpha\_9627327\_nt4341\_Genome\_Tile\_rc|1  
ACGTATGTCTGCAGTAGTTTAAACAACAGTACTAATATACAAATAAACACTGTGGCTAAAA  
>HPV32\_Alpha\_9627327\_nt4401\_Genome\_Tile\_rc|1  
TGATAATACACTTTGGTACAAACAATACAAAAACCCAACCTTTATTTTACAGCAATGTACAC  
>HPV32\_Alpha\_9627327\_nt4421\_Genome\_Tile\_rc|1  
CGACTTCGGTGTGGTGGCATTGATAATACACTTTGGTACAAACAATACAAAAACCCAAC  
>HPV32\_Alpha\_9627327\_nt4461\_Genome\_Tile\_rc|1  
GCAGGGCCCCGGCTCTGCAACAACAGGCGGTCGTGTTCTTATAGGCACATACCCTGTGCGC  
>HPV32\_Alpha\_9627327\_nt4761\_Genome\_Tile\_rc|1  
CACTGGTATGCTAGAATCAATAACTGCAGACTCTTCCAATAAGGAAATTACAGATGGGTC  
>HPV32\_Alpha\_9627327\_nt4781\_Genome\_Tile\_rc|1  
CCATGAGACGTGTGCGGTAGGCACTGGTATGCTAGAATCAATAACTGCAGACTCTTCCAAT  
>HPV32\_Alpha\_9627327\_nt4801\_Genome\_Tile\_rc|1  
AGGACGTAATATTAAACCCACCATGAGACGTGTGCGGTAGGCACTGGTATGCTAGAATCAA  
>HPV32\_Alpha\_9627327\_nt4821\_Genome\_Tile\_rc|1  
AGAGGACGGGCCACTTGCAGAGGACGTAATATTAAACCCACCATGAGACGTGTGCGGTAGG  
>HPV32\_Alpha\_9627327\_nt4841\_Genome\_Tile\_rc|1  
ATGTCCAATACAGCAGGTGTAGAGGACGGGCCACTTGCAGAGGACGTAATATTAAACCCA  
>HPV32\_Alpha\_9627327\_nt4901\_Genome\_Tile\_rc|1  
CTGTATACTGGATTGTGGGACGTAGTAGATGCAACCCTTATAGTATTGGTGGGAGGAGAA  
>HPV32\_Alpha\_9627327\_nt4961\_Genome\_Tile\_rc|1  
GATGTTAAGAGTCTACCATTACCCTCTACTGGCAAAGAAGGCCGTAAAGTAAAAGGATCA  
>HPV32\_Alpha\_9627327\_nt4981\_Genome\_Tile\_rc|1  
GAGGGGCTATTGTTGGGTGGGATGTTAAGAGTCTACCATTACCCTCTACTGGCAAAGAAG  
>HPV32\_Alpha\_9627327\_nt5001\_Genome\_Tile\_rc|1  
AGGAATTTCTCATACGAATGAGGGGCTATTGTTGGGTGGGATGTTAAGAGTCTACCATT  
>HPV32\_Alpha\_9627327\_nt5041\_Genome\_Tile\_rc|1  
CAGTATTACTTGTATCTGTGGATACCACAAAAGTGTCATAGGAATTTCTCATACGAAT  
>HPV32\_Alpha\_9627327\_nt5061\_Genome\_Tile\_rc|1  
AGGAATAGGGGTACTGGTAACAGTATTACTTGTATCTGTGGATACCACAAAAGTGTCAT  
>HPV32\_Alpha\_9627327\_nt5141\_Genome\_Tile\_rc|1  
GTTAAAAATGTTGTAGTAGCAACTGGACGTTGTTGAGTGACCCTGGTATATAAACCAAGG  
>HPV32\_Alpha\_9627327\_nt5201\_Genome\_Tile\_rc|1  
GTACCCTCAGCAGGACCCTCATATGCAGGGTTGTCATAGGTTACCAAACGCTCGGGAGAT  
>HPV32\_Alpha\_9627327\_nt5221\_Genome\_Tile\_rc|1  
TGGGATGTTCAAATTCCAACGTACCCTCAGCAGGACCCTCATATGCAGGGTTGTCATAGG  
>HPV32\_Alpha\_9627327\_nt5241\_Genome\_Tile\_rc|1

ATCAGGAGCCTCATGAATGGTGGGATGTTCAAATTTCCAACGTACCCTCAGCAGGACCCTC  
>HPV32\_Alpha\_9627327\_nt5301\_Genome\_Tile\_rc|1  
AGTGCCCTGCCTAGCAGATAGCACAGGACGGTGTAAATGCAATAATATCCATAAAATCAGA  
>HPV32\_Alpha\_9627327\_nt5321\_Genome\_Tile\_rc|1  
CCAATACGACTGACACGGACAGTGCCTTAGCAGATAGCACAGGACGGTGTAAATGCA  
>HPV32\_Alpha\_9627327\_nt5361\_Genome\_Tile\_rc|1  
AATACGAGCCCCACTACGTGTTTGCAAGGAAGCCCGTTGCCCAATACGACTGACACGGAC  
>HPV32\_Alpha\_9627327\_nt5441\_Genome\_Tile\_rc|1  
GAGCCTAAAGGTTGCAATTCTATAGCCTCTGATGGCCTAGTGATTGGGCTAATATCATGG  
>HPV32\_Alpha\_9627327\_nt5461\_Genome\_Tile\_rc|1  
TAGATACAGCTGTGGAGGAGGAGCCTAAAGGTTGCAATTCTATAGCCTCTGATGGCCTAG  
>HPV32\_Alpha\_9627327\_nt5481\_Genome\_Tile\_rc|1  
AATTGCGGATGAAGCAGTAGTAGATACAGCTGTGGAGGAGGAGCCTAAAGGTTGCAATTC  
>HPV32\_Alpha\_9627327\_nt5501\_Genome\_Tile\_rc|1  
ACATCAAACAGGCCATCATTAAATTGCGGATGAAGCAGTAGTAGATACAGCTGTGGAGGAG  
>HPV32\_Alpha\_9627327\_nt5521\_Genome\_Tile\_rc|1  
GTATGTCAGGGTCAACATAAACATCAAACAGGCCATCATTAAATTGCGGATGAAGCAGTAG  
>HPV32\_Alpha\_9627327\_nt5541\_Genome\_Tile\_rc|1  
CGGTAACGCGTGTGAGGGAGGTATGTCAGGGTCAACATAAACATCAAACAGGCCATCATT  
>HPV32\_Alpha\_9627327\_nt5581\_Genome\_Tile\_rc|1  
TTAAAGAAACAGTTGACACGTGTGTGGGGGACCGTAGGGGCGGTAACGCGTGTGAGGGAG  
>HPV32\_Alpha\_9627327\_nt5621\_Genome\_Tile\_rc|1  
GTTGTATTTGCAGTTTGTGTCAGGAACACTACCAAGACTAGTTAAAGAAACAGTTGACACG  
>HPV32\_Alpha\_9627327\_nt5681\_Genome\_Tile\_rc|1  
GACTCAGGAGGTGAAAGGTCAGGGCCTACATTAATATTTGTAGGTAAGGAAAGAGGGACA  
>HPV32\_Alpha\_9627327\_nt5701\_Genome\_Tile\_rc|1  
GTGTACTAATAAAGGGCGGAGACTCAGGAGGTGAAAGGTCAGGGCCTACATTAATATTTG  
>HPV32\_Alpha\_9627327\_nt5721\_Genome\_Tile\_rc|1  
AAAAGAAGGTGATACAGGACGTGTACTAATAAAGGGCGGAGACTCAGGAGGTGAAAGGTC  
>HPV32\_Alpha\_9627327\_nt5741\_Genome\_Tile\_rc|1  
CCTAATACCATAACAGAGTCAAAAGAAGGTGATACAGGACGTGTACTAATAAAGGGCGGA  
>HPV32\_Alpha\_9627327\_nt6001\_Genome\_Tile\_rc|1  
CTTTGGAATAGATGTTCTATTGGGTGTCTTCTTAATAGTATAATATGGATGCCCAACAGC  
>HPV32\_Alpha\_9627327\_nt6021\_Genome\_Tile\_rc|1  
CTATACTGCAATCCAGACACCTTTGGAATAGATGTTCTATTGGGTGTCTTCTTAATAGTA  
>HPV32\_Alpha\_9627327\_nt6361\_Genome\_Tile\_rc|1  
TGGGCAGTCGCCATTTGATTGTGCAGAGCAAGCAGCACCTTACCCCAATGCTCGCCAAT  
>HPV32\_Alpha\_9627327\_nt6481\_Genome\_Tile\_rc|1  
GTTCATAATATCTAATGGCACCTCAGCTTTTGAAGTTTGAAAGCACTAAAGTCCATTGC  
>HPV32\_Alpha\_9627327\_nt6681\_Genome\_Tile\_rc|1  
ATACTACTAGCTAAATTATTTCTGCCAGAAGCACCATTAGAAGCTTTTATATACATGTCC  
>HPV32\_Alpha\_9627327\_nt6901\_Genome\_Tile\_rc|1  
TAGATATTCCCTTAAAGTTAGTAGACTTGATGTGTCTTCAGTTGTTACAGTAGCACACAC  
>HPV32\_Alpha\_9627327\_nt7121\_Genome\_Tile\_rc|1  
TTTTTTTCAGGTGCTGTTACCTTAGCTTGACATCGTATGGCCTGAGACTGCACAAATCTAT  
>HPV32\_Alpha\_9627327\_nt7141\_Genome\_Tile\_rc|1  
ATAGTCAGAAAAAGGATCCTTTTTTTTCAGGTGCTGTTACCTTAGCTTGACATCGTATGGC  
>HPV32\_Alpha\_9627327\_nt7281\_Genome\_Tile\_rc|1  
TGACTGGAAGATGCTGTTTCGTTTTACTGCTGTAAGTTTAGGTCTTGACGTAACCCAGCT  
>HPV32\_Alpha\_9627327\_nt7301\_Genome\_Tile\_rc|1  
TTGCAGGAGAAGAAGACTTTTGACTGGAAGATGCTGTTTCGTTTTACTGCTGTAAGTTTAG  
>HPV32\_Alpha\_9627327\_nt7441\_Genome\_Tile\_rc|1  
ACAACAACATACAATGAACACAATCATACTTTATTAATATGCACACCGAAACACACATAT  
>HPV32\_Alpha\_9627327\_nt7461\_Genome\_Tile\_rc|1  
TTGAAAAATAAAATGGTGGTACAACAACATACAATGAACACAATCATACTTTATTAATAT

>HPV32\_Alpha\_9627327\_nt7561\_Genome\_Tile\_rc|1  
CAGTACATATATTTGGCAGTAAAACTGCATGTGCTTGCTAAATTTAATGGACATTATCC  
>HPV32\_Alpha\_9627327\_nt7621\_Genome\_Tile\_rc|1  
GCAAAAGGGCGTGTATGTTATGTATGTAAAAACATTTTGCTACTTAGCAATACCATTTGG  
>HPV32\_Alpha\_9627327\_nt7641\_Genome\_Tile\_rc|1  
CCTTTCTAAACATGCTTGTGCAAAAGGGCGTGTATGTTATGTATGTAAAAACATTTTGC  
>HPV32\_Alpha\_9627327\_nt7661\_Genome\_Tile\_rc|1  
TAAATGCAAAGCTATGCCAACCTTTCTAAACATGCTTGTGCAAAAGGGCGTGTATGTTA  
>HPV32\_Alpha\_9627327\_nt7681\_Genome\_Tile\_rc|1  
CAAAGGAAGAAGGAAATAAGTAAATGCAAAGCTATGCCAACCTTTCTAAACATGCTTGT  
>HPV32\_Alpha\_9627327\_nt7721\_Genome\_Tile\_rc|1  
TTTTAATTATACATAACAAATACAGTAGTCATAACATGAACAAAGGAAGAAGGAAATAAG  
>HPV32\_Alpha\_9627327\_nt7801\_Genome\_Tile\_rc|1  
TGACAAAGCACTAGTCTTGTCTAGGCCAGAGTAACTTGTAAGTACTGTGCCAAAACCCA  
>HPV32\_Alpha\_9627327\_nt7821\_Genome\_Tile\_rc|1  
ATACTTAGTTATATAAGGCATGACAAAGCACTAGTCTTGTCTAGGCCAGAGTAACTTGTA  
>HPV32\_Alpha\_9627327\_nt7841\_Genome\_Tile\_rc|1  
TTAGATGCAGTCAGTGACTAATACTTAGTTATATAAGGCATGACAAAGCACTAGTCTTGT  
>HPV32\_Alpha\_9627327\_nt7861\_Genome\_Tile\_rc|1  
GATTTTCGGTTGACAGTTTAATTAGATGCAGTCAGTGACTAATACTTAGTTATATAAGGCA  
>HPV63\_Mu\_9626605\_nt0021\_Genome\_Tile\_rc|1  
CCAGAGTTTTATAAGGAAAAAGCTGGCAACGACCGTAAACGTTTCGTGTTAGAACTAGAGA  
>HPV63\_Mu\_9626605\_nt0041\_Genome\_Tile\_rc|1  
TGTCCCAAGAGAAATTTCCACCAGAGTTTTATAAGGAAAAAGCTGGCAACGACCGTAAAC  
>HPV63\_Mu\_9626605\_nt0061\_Genome\_Tile\_rc|1  
GTACAGATGTCAGGTCCATCTGTCCCAAGAGAAATTTCCACCAGAGTTTTATAAGGAAAA  
>HPV63\_Mu\_9626605\_nt0121\_Genome\_Tile\_rc|1  
AAGGAACAACCAAATCAATAAATGGGATACGGAGAGCAGAACTCAGATCCCGAACCGAAT  
>HPV63\_Mu\_9626605\_nt0161\_Genome\_Tile\_rc|1  
AATTTTTTCAGCATTTGTAAGAAATTTCAAGCAAAAATTGCAAGGAACAACCAAATCAATA  
>HPV63\_Mu\_9626605\_nt0181\_Genome\_Tile\_rc|1  
AGTCAAAATAATCAAACAGCAATTTTTTCAGCATTTGTAAGAAATTTCAAGCAAAAATTGC  
>HPV63\_Mu\_9626605\_nt0221\_Genome\_Tile\_rc|1  
CAACAAGCAAACACGAAATTATCTCGCCAGATAAGATGCAAGTCAAAATAATCAAACAGC  
>HPV63\_Mu\_9626605\_nt0241\_Genome\_Tile\_rc|1  
CATGCCTAGCACAGCACTGACAACAAGCAAACACGAAATTATCTCGCCAGATAAGATGCA  
>HPV63\_Mu\_9626605\_nt0261\_Genome\_Tile\_rc|1  
CATAAACTCAAGCAGACTAACATGCCTAGCACAGCACTGACAACAAGCAAACACGAAATT  
>HPV63\_Mu\_9626605\_nt0321\_Genome\_Tile\_rc|1  
AAGAGGTTGATTAAGTAATTCTTCTACTTCAGATACCTCGAAAGACTCCTGATAATAAAG  
>HPV63\_Mu\_9626605\_nt0341\_Genome\_Tile\_rc|1  
CACCTTAAACCAATATTTACAAGAGGTTGATTAAGTAATTCTTCTACTTCAGATACCTCG  
>HPV63\_Mu\_9626605\_nt0361\_Genome\_Tile\_rc|1  
GTTTTTTTGTGCATGTAACACACCTTAAACCAATATTTACAAGAGGTTGATTAAGTAATT  
>HPV63\_Mu\_9626605\_nt0421\_Genome\_Tile\_rc|1  
TCCTTACTTTATGAACTCTTCTCCAGCAGAAACAACAGCTAACTTTTCTGAAACAGTCA  
>HPV63\_Mu\_9626605\_nt0441\_Genome\_Tile\_rc|1  
GCACCTTGCTTTGAATTTGTTTCCTTACTTTATGAACTCTTCTCCAGCAGAAACAACAGC  
>HPV63\_Mu\_9626605\_nt0461\_Genome\_Tile\_rc|1  
ATGTAGAGTCTGCACAACTGCACCTTTGCTTTGAATTTGTTTCCTTACTTTATGAACTCTT  
>HPV63\_Mu\_9626605\_nt0481\_Genome\_Tile\_rc|1  
GAGTCTGCACAACTATATAATGTAGAGTCTGCACAACTGCACCTTTGCTTTGAATTTGT  
>HPV63\_Mu\_9626605\_nt0521\_Genome\_Tile\_rc|1  
ACCTATATTTGGCTGCTCTCCACCATTGTTAATTATATAGAGTCTGCACAACTATATA  
>HPV63\_Mu\_9626605\_nt0541\_Genome\_Tile\_rc|1

TCTTCTTGACTCACCAAATCACCTATATTTGGCTGCTCTCCCACCATTGTTAATTATATA  
>HPV63\_Mu\_9626605\_nt0561\_Genome\_Tile\_rc|1  
TTAGATCTAGGACGCTTGGTTCTTCTTGACTCACCAAATCACCTATATTTGGCTGCTCTC  
>HPV63\_Mu\_9626605\_nt0581\_Genome\_Tile\_rc|1  
AGGTATATCCTCATAACAATTTAGATCTAGGACGCTTGGTTCTTCTTGACTCACCAAATC  
>HPV63\_Mu\_9626605\_nt0621\_Genome\_Tile\_rc|1  
GCACAATTGCATATGGATATTCAGACTCCTCCTCCTCAGCAGGTATATCCTCATAACAAT  
>HPV63\_Mu\_9626605\_nt0641\_Genome\_Tile\_rc|1  
ATCGCACAAACCACAAGGAAGCACAAATTGCATATGGATATTCAGACTCCTCCTCCTCAGC  
>HPV63\_Mu\_9626605\_nt0661\_Genome\_Tile\_rc|1  
CAGGTCAGCCTTAACAGCTGATCGCACAAACCACAAGGAAGCACAAATTGCATATGGATAT  
>HPV63\_Mu\_9626605\_nt0681\_Genome\_Tile\_rc|1  
GAGTAGACAGGTCAGAAACGCAGGTCAGCCTTAACAGCTGATCGCACAAACCACAAGGAA  
>HPV63\_Mu\_9626605\_nt0801\_Genome\_Tile\_rc|1  
AATATAACCAATCATCATTATTTGTACCTCTGTCTGGTCATCTTAGTGTCGTTGGTGTCGAA  
>HPV63\_Mu\_9626605\_nt0841\_Genome\_Tile\_rc|1  
ATTCGCTCTCATCATCATCCCGACATTCTGCCTCATCCACAATATACCAATCATCATTAT  
>HPV63\_Mu\_9626605\_nt0881\_Genome\_Tile\_rc|1  
CTATTAAACAATGAATTATAGGTGTCCTCCAAATCCTCCAATTGCTCTCATCATCATCC  
>HPV63\_Mu\_9626605\_nt0921\_Genome\_Tile\_rc|1  
CTGCGTATCGTCTAATAGATCTGATATGTCACTTTCAGATCTATTAAACAATGAATTATA  
>HPV63\_Mu\_9626605\_nt0941\_Genome\_Tile\_rc|1  
AGGGAATTTCCCTGACTTTGCTGCGTATCGTCTAATAGATCTGATATGTCACTTTCAGAT  
>HPV63\_Mu\_9626605\_nt1041\_Genome\_Tile\_rc|1  
CTCTGTGGCACTTGCCTGCGGAGGACTGTTTAAGTACTTTTCGTTTTAGGGTATTTAGGTC  
>HPV63\_Mu\_9626605\_nt1061\_Genome\_Tile\_rc|1  
CTGAGGCTATTGCAGGCAGTCTCTGTGGCACTTGCCTGCGGAGGACTGTTTAAGTACTTT  
>HPV63\_Mu\_9626605\_nt1081\_Genome\_Tile\_rc|1  
TTATAGATTCCAATCTGGGACTGAGGCTATTGCAGGCAGTCTCTGTGGCACTTGCCTGCG  
>HPV63\_Mu\_9626605\_nt1121\_Genome\_Tile\_rc|1  
AATAGTTGCTTTCTTGCCTTTTTTTCCCTCTGCGAAATTGTTATAGATTCCAATCTGGGA  
>HPV63\_Mu\_9626605\_nt1161\_Genome\_Tile\_rc|1  
CTGGCATAGCGATAACTCTATGCCACTGTCATTTTGTGTAAATAGTTGCTTTCTTGCCTT  
>HPV63\_Mu\_9626605\_nt1181\_Genome\_Tile\_rc|1  
TTAATATTGTCAACTTCATCCTGGCATAGCGATAACTCTATGCCACTGTCATTTTGTGTA  
>HPV63\_Mu\_9626605\_nt1261\_Genome\_Tile\_rc|1  
TCAAAATGTCCACTCCTATACAGTCACGCACCCACCTCCCAGAGACTGTACGATGTCTA  
>HPV63\_Mu\_9626605\_nt1281\_Genome\_Tile\_rc|1  
AGATCTTGTATTACTGCATTTCAAAATGTCCACTCCTATACAGTCACGCACCCACCTCC  
>HPV63\_Mu\_9626605\_nt1301\_Genome\_Tile\_rc|1  
TTAAATTTGGCAAGTAGAGCAGATCTTGTATTACTGCATTTCAAAATGTCCACTCCTATA  
>HPV63\_Mu\_9626605\_nt1321\_Genome\_Tile\_rc|1  
AACTGACACCTACTGTGTCTTTAAATTTGGCAAGTAGAGCAGATCTTGTATTACTGCATT  
>HPV63\_Mu\_9626605\_nt1341\_Genome\_Tile\_rc|1  
TGCTCTGGTGAGGTCAGTAAACTGACACCTACTGTGTCTTTAAATTTGGCAAGTAGAGC  
>HPV63\_Mu\_9626605\_nt1381\_Genome\_Tile\_rc|1  
CTATGACCCAGTAACTACAGCATGTCTTGTGTTTTGTATGCTCTGGTGAGGTCAGTAA  
>HPV63\_Mu\_9626605\_nt1401\_Genome\_Tile\_rc|1  
AGATGTTACTCCCCACACTGCTATGACCCAGTAACTACAGCATGTCTTGTGTTTTTGTA  
>HPV63\_Mu\_9626605\_nt1421\_Genome\_Tile\_rc|1  
TTCACAACGTCCACAGACGTAGATGTTACTCCCCACACTGCTATGACCCAGTAACTACAG  
>HPV63\_Mu\_9626605\_nt1441\_Genome\_Tile\_rc|1  
ACTGAACTTGGGAATACAGTTTTTCACAACGTCCACAGACGTAGATGTTACTCCCCACACTG  
>HPV63\_Mu\_9626605\_nt1461\_Genome\_Tile\_rc|1  
TTCTACATGCATATAATTACACTGAACTTGGGAATACAGTTTTTCACAACGTCCACAGACGT

>HPV63\_Mu\_9626605\_nt1481\_Genome\_Tile\_rc|1  
TTTTTTTTCAGTTAAACAATGTTCTACATGCATATAATTACACTGAACTTGAATACAGTT  
>HPV63\_Mu\_9626605\_nt1501\_Genome\_Tile\_rc|1  
CTAATACAATTAGAACTTATTTTTTTCAGTTAAACAATGTTCTACATGCATATAATTAC  
>HPV63\_Mu\_9626605\_nt1581\_Genome\_Tile\_rc|1  
TATGTAATTACTTTGCACATTCAAACCTGCTAGTTACGAGATTTAACACTGTTTCTCTACT  
>HPV63\_Mu\_9626605\_nt1661\_Genome\_Tile\_rc|1  
GTATATACAGCTGGAGACATAGATCTCCTATACCAATATAACGCTGCCGCCATACTTCTA  
>HPV63\_Mu\_9626605\_nt1681\_Genome\_Tile\_rc|1  
AATCTGGCATTTCTCCCCAGGTATATACAGCTGGAGACATAGATCTCCTATACCAATATA  
>HPV63\_Mu\_9626605\_nt1741\_Genome\_Tile\_rc|1  
ACAATTCAAAATGCTTTTCTGATGCTAATTGATGATTCACAATGTCTGCTGCGCCATCC  
>HPV63\_Mu\_9626605\_nt1941\_Genome\_Tile\_rc|1  
TGCTGACATAGACATACTACTCATTTCTGCCCTTTTGTAATGACTAACCATTTCTAGCACA  
>HPV63\_Mu\_9626605\_nt1961\_Genome\_Tile\_rc|1  
TCCAGTCTTTTATAAATCCATGCTGACATAGACATACTACTCATTTCTGCCCTTTTGTA  
>HPV63\_Mu\_9626605\_nt1981\_Genome\_Tile\_rc|1  
CACCACCATTTTCAACTTCCTCCAGTCTTTTATAAATCCATGCTGACATAGACATACTAC  
>HPV63\_Mu\_9626605\_nt2001\_Genome\_Tile\_rc|1  
CTTTACAATATGTTTCCAGTCAACCACCATTTTCAACTTCCTCCAGTCTTTTATAAATCCA  
>HPV63\_Mu\_9626605\_nt2021\_Genome\_Tile\_rc|1  
ACTTCTTGAAACCTCAAGAACTTTACAATATGTTTCCAGTCAACCACCATTTTCAACTTCC  
>HPV63\_Mu\_9626605\_nt2041\_Genome\_Tile\_rc|1  
TCATGAAACTTATAAATTCTACTTCTTGAAACCTCAAGAACTTTACAATATGTTTCCAGT  
>HPV63\_Mu\_9626605\_nt2061\_Genome\_Tile\_rc|1  
TAACAATTCCTTAAATGCTATCATGAAACTTATAAATTCTACTTCTTGAAACCTCAAGAA  
>HPV63\_Mu\_9626605\_nt2101\_Genome\_Tile\_rc|1  
GACCATATATTACAAGACAATTTTTCTTTGGTTTACCACCTTAACAATTCCTTAAATGCTA  
>HPV63\_Mu\_9626605\_nt2161\_Genome\_Tile\_rc|1  
CTTTTCTTTTAATACTCTCAACAACTCATACAAAACATAGATTTACCAGTATTTGGTG  
>HPV63\_Mu\_9626605\_nt2181\_Genome\_Tile\_rc|1  
GCTATTTACATAAGATATTACTTTTCTTTTAACTCTCAACAACTCATACAAAACAT  
>HPV63\_Mu\_9626605\_nt2261\_Genome\_Tile\_rc|1  
TAATCCCATGCTGGTTTTGTTGCATCATCTAATAATGCTATTTTAGTGCTAGCTAGTGGT  
>HPV63\_Mu\_9626605\_nt2301\_Genome\_Tile\_rc|1  
AGGATTCCCATCTAAAGCATTTCTCAAAAATAAATCAATATAATCCCATGCTGGTTTTGT  
>HPV63\_Mu\_9626605\_nt2401\_Genome\_Tile\_rc|1  
ACATCCAACATACATCAGCCTTAACATTTTATATTAGAAGTTATCATAAGTGGAGGACATT  
>HPV63\_Mu\_9626605\_nt2421\_Genome\_Tile\_rc|1  
TGTTATCCTACTATGTAAATACATCCAACATACATCAGCCTTAACATTTATATTAGAAGT  
>HPV63\_Mu\_9626605\_nt2481\_Genome\_Tile\_rc|1  
TAAGGAAAAATGCCGTTGACCATTTTCATCAAATGGAAAAGGTTGTTTAAATTCAAAACA  
>HPV63\_Mu\_9626605\_nt2641\_Genome\_Tile\_rc|1  
TTCAATATCTTTACTGTCTTTCTCATATAGAGTTAGAAGCTGCTCTTGTAGCCAGTCTAA  
>HPV63\_Mu\_9626605\_nt2661\_Genome\_Tile\_rc|1  
TTCCACTGCATTATCTGATCTTCAATATCTTTACTGTCTTTCTCATATAGAGTTAGAAGC  
>HPV63\_Mu\_9626605\_nt2701\_Genome\_Tile\_rc|1  
TCGGGCATAGTGGAATAACACTTGTTCCTGTCTAAGTAGATTCCACTGCATTATCTGATC  
>HPV63\_Mu\_9626605\_nt2721\_Genome\_Tile\_rc|1  
AGTCGCATTATTTCCCTTTTTTCGGGCATAGTGGAATAACACTTGTTCCTGTCTAAGTAGA  
>HPV63\_Mu\_9626605\_nt2761\_Genome\_Tile\_rc|1  
ATCCTGGGAAGCTGCAAGGGAAGGCACAACCTGCAGGCCAAGTCGCATTATTTCCCTTTTT  
>HPV63\_Mu\_9626605\_nt2801\_Genome\_Tile\_rc|1  
CACTAAGATAAAGAGTCATTTCTATAGCTGTTTTTGTCTTTATCCTGGGAAGCTGCAAGGG  
>HPV63\_Mu\_9626605\_nt2821\_Genome\_Tile\_rc|1

ATATTGTGAGTCTCTGAGGCCACTAAGATAAAGAGTCATTTCTATAGCTGTTTTTGCTTT  
>HPV63\_Mu\_9626605\_nt2901\_Genome\_Tile\_rc|1  
CCTCCCTTTTGAATGTATGATCTGGTGGTGCTAAAAAGATTTCTCTGCTAGTATCTTGT  
>HPV63\_Mu\_9626605\_nt2921\_Genome\_Tile\_rc|1  
AGATTACCTCAATTGTTTGCCTCCCTTTTGAATGTATGATCTGGTGGTGCTAAAAAGA  
>HPV63\_Mu\_9626605\_nt2961\_Genome\_Tile\_rc|1  
CATACAGTATGTCTGGTGCTATTATTGGGATCCTCATCATAGATTACCTCAATTGTTTGC  
>HPV63\_Mu\_9626605\_nt2981\_Genome\_Tile\_rc|1  
TTTGATAATATATATGGCGCCATACAGTATGTCTGGTGCTATTATTGGGATCCTCATCAT  
>HPV63\_Mu\_9626605\_nt3061\_Genome\_Tile\_rc|1  
TTTGACACCATCATATTCTAAATAAAACACACCATGAACATCTACATCACTAGCTGCTTT  
>HPV63\_Mu\_9626605\_nt3081\_Genome\_Tile\_rc|1  
TGAAAGTCAACATAGTAGTTTTTGACACCATCATATTCTAAATAAAACACACCATGAACA  
>HPV63\_Mu\_9626605\_nt3101\_Genome\_Tile\_rc|1  
TATATCGATTGGCCTCTTCTTGAAAGTCAACATAGTAGTTTTTGACACCATCATATTCTA  
>HPV63\_Mu\_9626605\_nt3121\_Genome\_Tile\_rc|1  
AGTATATCGACCTGTTTTGCTATATCGATTGGCCTCTTCTTGAAAGTCAACATAGTAGTT  
>HPV63\_Mu\_9626605\_nt3141\_Genome\_Tile\_rc|1  
CTTTTACCCTCATATTGAACAGTATATCGACCTGTTTTGCTATATCGATTGGCCTCTTCT  
>HPV63\_Mu\_9626605\_nt3181\_Genome\_Tile\_rc|1  
TAGTGGGGAGCTATTGACAGGAGACATAACATTTGTGAACCTTTACCCTCATATTGAAC  
>HPV63\_Mu\_9626605\_nt3221\_Genome\_Tile\_rc|1  
GGGTGGCTGGGTGTTGGTGTCTGTAGGAGACCCAGAAGTCCGTAGTGGGGAGCTATTGACAG  
>HPV63\_Mu\_9626605\_nt3241\_Genome\_Tile\_rc|1  
AGTTTGGGTGGATTGTCTTGGGTGGCTGGGTGGTGTCTGTAGGAGACCCAGAAGTCCG  
>HPV63\_Mu\_9626605\_nt3261\_Genome\_Tile\_rc|1  
TTCGTCTCTGCTTTTCTGGCAGTTTGGGTGGATTGTCTTGGGTGGCTGGGTGGTGTCT  
>HPV63\_Mu\_9626605\_nt3301\_Genome\_Tile\_rc|1  
CTTGCGAACAGCCGCGATTTTCGGGTGGTGTCTCGACCCCTTCGTCTCTGCTTTTCTGGC  
>HPV63\_Mu\_9626605\_nt3401\_Genome\_Tile\_rc|1  
GTTCTCCACTACCGGCAGAGGCTCTGGCCGATTCTCCTTCTCCTCGTCTGAGGGTGGTAT  
>HPV63\_Mu\_9626605\_nt3421\_Genome\_Tile\_rc|1  
CGGAGAAATGAATGCCACCCGTTCTCCACTACCGGCAGAGGCTCTGGCCGATTCTCCTTC  
>HPV63\_Mu\_9626605\_nt3441\_Genome\_Tile\_rc|1  
GTTGATGTTCCAACGTCTCCCGAGAAATGAATGCCACCCGTTCTCCACTACCGGCAGAG  
>HPV63\_Mu\_9626605\_nt3521\_Genome\_Tile\_rc|1  
TCAGACAAATTATGGGTGGATCCCGAGCCTCCTGTATAAGTCTTCAAGTCTTGATTGAC  
>HPV63\_Mu\_9626605\_nt3561\_Genome\_Tile\_rc|1  
ATCCTATACCTTAAGCACTTAAGTTGATTAGGGCCCCCTTCAGACAAATTATGGGTGGA  
>HPV63\_Mu\_9626605\_nt3601\_Genome\_Tile\_rc|1  
AGTACTGATACTTTCAAAGTCAGATGAATTTGAAGCTTTAATCCTATACCTTAAGCACTT  
>HPV63\_Mu\_9626605\_nt3621\_Genome\_Tile\_rc|1  
TTATGTACCCAATGCCATGTAGTACTGATACTTTCAAAGTCAGATGAATTTGAAGCTTTA  
>HPV63\_Mu\_9626605\_nt3641\_Genome\_Tile\_rc|1  
CTACTCTATCTGTGCATTTATTATGTACCCAATGCCATGTAGTACTGATACTTTCAAAGT  
>HPV63\_Mu\_9626605\_nt3661\_Genome\_Tile\_rc|1  
CACCAGCATACGTGCATGACCTACTCTATCTGTGCATTTATTATGTACCCAATGCCATGT  
>HPV63\_Mu\_9626605\_nt3681\_Genome\_Tile\_rc|1  
TGTTCTGTTGATATAAAACGCACCAGCATACGTGCATGACCTACTCTATCTGTGCATTTA  
>HPV63\_Mu\_9626605\_nt3701\_Genome\_Tile\_rc|1  
TATCTAAAAATCGGTCACGTTGTTCTGTTGATATAAAACGCACCAGCATACGTGCATGAC  
>HPV63\_Mu\_9626605\_nt3721\_Genome\_Tile\_rc|1  
AGATTTAGGCACCACCACCTTATCTAAAAATCGGTCACGTTGTTCTGTTGATATAAAACG  
>HPV63\_Mu\_9626605\_nt3781\_Genome\_Tile\_rc|1  
CAAAATATACCCCAACACCCACCCTTAGGAACCGTCAAATGCCCTAAAAATAACAGAAAC



>HPV63\_Mu\_9626605\_nt3801\_Genome\_Tile\_rc|1  
ACGTACTCTTAACATGATTACAAAATATACCCCAACACCCACCCTTAGGAACCGTCAAAT  
>HPV63\_Mu\_9626605\_nt3821\_Genome\_Tile\_rc|1  
TGTGGAGCAGCTCGTCGTTTACGTACTCTTAACATGATTACAAAATATACCCCAACACCC  
>HPV63\_Mu\_9626605\_nt3841\_Genome\_Tile\_rc|1  
TACAAGCAGGATAAATATCTTGTGGAGCAGCTCGTCGTTTACGTACTCTTAACATGATTA  
>HPV63\_Mu\_9626605\_nt3861\_Genome\_Tile\_rc|1  
GGGGCAATTGTTTGCAACCTTACAAGCAGGATAAATATCTTGTGGAGCAGCTCGTCGTTT  
>HPV63\_Mu\_9626605\_nt4041\_Genome\_Tile\_rc|1  
AGGTGTACTTCTGCCACCAACTCGCACCCGACCCTGTCCCCTAGAGGTGTATAACCATA  
>HPV63\_Mu\_9626605\_nt4101\_Genome\_Tile\_rc|1  
TGAATCTATAGGTAATATATCCCTTGGTCCCTACAGTCTCCACAGGTACTGTTGGTCTTAC  
>HPV63\_Mu\_9626605\_nt4121\_Genome\_Tile\_rc|1  
GAGGGCCCTAAAGGATCCAATGAATCTATAGGTAATATATCCCTTGGTCCTACAGTCTCC  
>HPV63\_Mu\_9626605\_nt4141\_Genome\_Tile\_rc|1  
TATCTTCTAGTTCAATGACTGAGGGCCCTAAAGGATCCAATGAATCTATAGGTAATATAT  
>HPV63\_Mu\_9626605\_nt4181\_Genome\_Tile\_rc|1  
GGATGCACTTCAGCCACTACTTCCACTGTTGTGGCTGGAATATCTTCTAGTTCAATGACT  
>HPV63\_Mu\_9626605\_nt4221\_Genome\_Tile\_rc|1  
ATCAGTAGTAGGTGCCGGTATTTGTGGAGTATCAGATATGGGATGCACTTCAGCCACTAC  
>HPV63\_Mu\_9626605\_nt4241\_Genome\_Tile\_rc|1  
AGAACAGCTGAACTAGATTTCATCAGTAGTAGGTGCCGGTATTTGTGGAGTATCAGATATG  
>HPV63\_Mu\_9626605\_nt4261\_Genome\_Tile\_rc|1  
GACTTTCTTGTGGAATATGAAGAACAGCTGAACTAGATTTCATCAGTAGTAGGTGCCGGTA  
>HPV63\_Mu\_9626605\_nt4281\_Genome\_Tile\_rc|1  
TGTGATTGTACGTGCAGCAGGACTTTCTTGTGGAATATGAAGAACAGCTGAACTAGATTC  
>HPV63\_Mu\_9626605\_nt4301\_Genome\_Tile\_rc|1  
GGATTATTGTATTGGGAACGTGTGATTGTACGTGCAGCAGGACTTTCTTGTGGAATATGA  
>HPV63\_Mu\_9626605\_nt4341\_Genome\_Tile\_rc|1  
ACCTGATGCTATGTCTGCACTAGCTGTGATCCTGAATAAAGGATTATTGTATTGGGAACG  
>HPV63\_Mu\_9626605\_nt4361\_Genome\_Tile\_rc|1  
TTATCAGATGCTGAAGCTTCACCTGATGCTATGTCTGCACTAGCTGTGATCCTGAATAAA  
>HPV63\_Mu\_9626605\_nt4381\_Genome\_Tile\_rc|1  
TATCTACATCTATAAAAATATTATCAGATGCTGAAGCTTCACCTGATGCTATGTCTGCAC  
>HPV63\_Mu\_9626605\_nt4401\_Genome\_Tile\_rc|1  
TCCTACTATTTGACCCGGCGTATCTACATCTATAAAAATATTATCAGATGCTGAAGCTTC  
>HPV63\_Mu\_9626605\_nt4421\_Genome\_Tile\_rc|1  
TTAACTAGTGGTATTTCTTGTCTACTATTTGACCCGGCGTATCTACATCTATAAAAATA  
>HPV63\_Mu\_9626605\_nt4461\_Genome\_Tile\_rc|1  
TTCAAGCTCACCTTCAGTAGATATAGGTCCCATATCAAATTAAGTAGTGGTATTTCTTG  
>HPV63\_Mu\_9626605\_nt4501\_Genome\_Tile\_rc|1  
GTACTTGTGTGGTTCTTGGTGTACTAGTTGTGAACTCAGTTTCAAGCTCACCTTCAGTAG  
>HPV63\_Mu\_9626605\_nt4521\_Genome\_Tile\_rc|1  
GAAACGTGTAGGCCTTTCCTGTACTTGTGTGGTTCTTGGTGTACTAGTTGTGAACTCAGT  
>HPV63\_Mu\_9626605\_nt4541\_Genome\_Tile\_rc|1  
TCATAATAGCGTCTATTATAGAAACGTGTAGGCCTTTCCTGTACTTGTGTGGTTCTTGGT  
>HPV63\_Mu\_9626605\_nt4561\_Genome\_Tile\_rc|1  
GTGCAGTAAGTGGCACTTGTTTCATAATAGCGTCTATTATAGAAACGTGTAGGCCTTTCCT  
>HPV63\_Mu\_9626605\_nt4601\_Genome\_Tile\_rc|1  
TCAAAAGTAAGTAAGGAAGCAGGCCTTGTGATAAATTCAGGTGCAGTAAGTGGCACTTGT  
>HPV63\_Mu\_9626605\_nt4621\_Genome\_Tile\_rc|1  
TCCTTTCAAATGCAGGATTCTCAAAAGTAAGTAAGGAAGCAGGCCTTGTGATAAATTCAG  
>HPV63\_Mu\_9626605\_nt4641\_Genome\_Tile\_rc|1  
TTCAAAAATCAAAGAAACACTCCTTTCAAATGCAGGATTCTCAAAAGTAAGTAAGGAAGC  
>HPV63\_Mu\_9626605\_nt4661\_Genome\_Tile\_rc|1

AAAATATCTTCTAAATCTTGTTCAAAAATCAAAGAAACACTCCTTTCAAATGCAGGATTC  
>HPV63\_Mu\_9626605\_nt4721\_Genome\_Tile\_rc|1  
CGACTGTATGTTGGTCTGCTTAAATAAACAATGTCTCTAAAATCCTGATCAGGAGCATTT  
>HPV63\_Mu\_9626605\_nt4741\_Genome\_Tile\_rc|1  
GCATGCGGCCATCAGGGGCACGACTGTATGTTGGTCTGCTTAAATAAACAATGTCTCTAA  
>HPV63\_Mu\_9626605\_nt4801\_Genome\_Tile\_rc|1  
CACCTATAGTAACACCACTTCTGGTACTTATAGTGGCTCTGCGTCCCAGGCGGCTTAGGC  
>HPV63\_Mu\_9626605\_nt4861\_Genome\_Tile\_rc|1  
GTAACCTCAATGCCATCATTTGAGGAGATAGAGCTAATATCCATATAAAAAGTGTGATTGAG  
>HPV63\_Mu\_9626605\_nt4881\_Genome\_Tile\_rc|1  
AGAAGCTTCACCCAGTGTTTGTAACTCAATGCCATCATTTGAGGAGATAGAGCTAATATC  
>HPV63\_Mu\_9626605\_nt4901\_Genome\_Tile\_rc|1  
CTTTGCACCACAGTCTCGCCAGAAGCTTCACCCAGTGTTTGTAACTCAATGCCATCATTT  
>HPV63\_Mu\_9626605\_nt4921\_Genome\_Tile\_rc|1  
GATCCGATGCAGCAAGAGAACTTTGCACCACAGTCTCGCCAGAAGCTTCACCCAGTGTTT  
>HPV63\_Mu\_9626605\_nt4941\_Genome\_Tile\_rc|1  
TGAATGTTCTGCTTCAATAGGATCCGATGCAGCAAGAGAACTTTGCACCACAGTCTCGCC  
>HPV63\_Mu\_9626605\_nt4981\_Genome\_Tile\_rc|1  
CAATATCATAACTATCTATAGATGGTGCTGGTTCATGAATGAATGTTCTGCTTCAATAG  
>HPV63\_Mu\_9626605\_nt5001\_Genome\_Tile\_rc|1  
AGTCTCAGACTGAAGTGAAACAATATCATAACTATCTATAGATGGTGCTGGTTCATGAA  
>HPV63\_Mu\_9626605\_nt5021\_Genome\_Tile\_rc|1  
AACAAATGTTTCATCTGAATAAGTCTCAGACTGAAGTGAAACAATATCATAACTATCTATA  
>HPV63\_Mu\_9626605\_nt5041\_Genome\_Tile\_rc|1  
CTACAGGTTTCATACATATCTAACAAATGTTTCATCTGAATAAGTCTCAGACTGAAGTGAAA  
>HPV63\_Mu\_9626605\_nt5061\_Genome\_Tile\_rc|1  
TTGTAATTGCAAGGAAGAACCTACAGGTTTCATACATATCTAACAAATGTTTCATCTGAATA  
>HPV63\_Mu\_9626605\_nt5081\_Genome\_Tile\_rc|1  
CGACCTCTGACGTCTGATATTTGTAATTGCAAGGAAGAACCTACAGGTTTCATACATATCT  
>HPV63\_Mu\_9626605\_nt5101\_Genome\_Tile\_rc|1  
GAATATCAATAACAGTTGGCCGACCTCTGACGTCTGATATTTGTAATTGCAAGGAAGAAC  
>HPV63\_Mu\_9626605\_nt5141\_Genome\_Tile\_rc|1  
GCATTTATAGGACCTAATGGAGGCCTGCGGGGTCTAAAGGGAATATCAATAACAGTTGGC  
>HPV63\_Mu\_9626605\_nt5161\_Genome\_Tile\_rc|1  
GACTATAGATATCAACACCAGCATTTATAGGACCTAATGGAGGCCTGCGGGGTCTAAAGG  
>HPV63\_Mu\_9626605\_nt5221\_Genome\_Tile\_rc|1  
TAATTAATGGAATGTCAAGATCAGTAGGATTTATAGTAGGTGATCCAACACTAGCAGTTG  
>HPV63\_Mu\_9626605\_nt5281\_Genome\_Tile\_rc|1  
GACGTTTACGCAAACCTTGATGTAAATCATAATCCCCTGTTGAATTATCTAAATGTATAA  
>HPV63\_Mu\_9626605\_nt5301\_Genome\_Tile\_rc|1  
TCAAATATGAACTAATTTGCGACGTTTACGCAAACCTTGATGTAAATCATAATCCCCTGT  
>HPV63\_Mu\_9626605\_nt5321\_Genome\_Tile\_rc|1  
AAACAGCCATCTGTAAAATATCAAATATGAACTAATTTGCGACGTTTACGCAAACCTTGGA  
>HPV63\_Mu\_9626605\_nt5341\_Genome\_Tile\_rc|1  
CTTATTCTGGGCAGGAAGCCAAACAGCCATCTGTAAAATATCAAATATGAACTAATTTGC  
>HPV63\_Mu\_9626605\_nt6841\_Genome\_Tile\_rc|1  
GTATATTACAGGCCCGTCGCCTCCGTTTGGCCACAGTAGTATTGGAGGATCTACGTTTTCT  
>HPV63\_Mu\_9626605\_nt6861\_Genome\_Tile\_rc|1  
ATATAATTCAACATTACATGTATATTACAGGCCCGTCGCCTCCGTTTGGCCACAGTAGTA  
>HPV63\_Mu\_9626605\_nt6901\_Genome\_Tile\_rc|1  
AAAGTGCAAGTGCCAAAGTCAAGAATTCACAATTCACATTATATAATTCAACATTACAT  
>HPV63\_Mu\_9626605\_nt6921\_Genome\_Tile\_rc|1  
AGTATCAGTATGCCAAGAATAAAGTGCAAGTGCCAAAGTCAAGAATTCACAATTCACATT  
>HPV63\_Mu\_9626605\_nt6941\_Genome\_Tile\_rc|1  
CAAGCATTGAACAAGTTTCAAGTATCAGTATGCCAAGAATAAAGTGCAAGTGCCAAAGTC

>HPV63\_Mu\_9626605\_nt6981\_Genome\_Tile\_rc|1  
ATAAACGTTTATTAAACAATACTGTACAGGTGTGTAACCTTCAAGCATTGAACAAGTTTCA  
>HPV63\_Mu\_9626605\_nt7001\_Genome\_Tile\_rc|1  
GACAGGTAAATGACAGCAGCATAAACGTTTATTAAACAATACTGTACAGGTGTGTAACCTT  
>HPV63\_Mu\_9626605\_nt7021\_Genome\_Tile\_rc|1  
CTAGGCAATAATGACTCGAAGACAGGTAAATGACAGCAGCATAAACGTTTATTAAACAATA  
>HPV63\_Mu\_9626605\_nt7041\_Genome\_Tile\_rc|1  
CAAGTCATGAGGCTATATGACTAGGCAATAATGACTCGAAGACAGGTAAATGACAGCAGC  
>HPV63\_Mu\_9626605\_nt7061\_Genome\_Tile\_rc|1  
GCCACATACCAATTGCATGCCAAGTCATGAGGCTATATGACTAGGCAATAATGACTCGAA  
>HPV63\_Mu\_9626605\_nt7081\_Genome\_Tile\_rc|1  
GTATCCTGTTTGAAGTATCTGCCACATACCAATTGCATGCCAAGTCATGAGGCTATATGA  
>HPV63\_Mu\_9626605\_nt7121\_Genome\_Tile\_rc|1  
GGTAACTTCAAAATTCGCGCGCGCGCCAAAAAGGATACCAGTATCCTGTTTGAAGTATCT  
>HPV63\_Mu\_9626605\_nt7161\_Genome\_Tile\_rc|1  
CGGGATCAGATCCAGACGTCTCAGAACAAGTTGGAACAGTGGTAACTTCAAAATTCGCGC  
>HPV63\_Mu\_9626605\_nt7181\_Genome\_Tile\_rc|1  
TTGGCAGTAACGACAGCGGTTCGGGATCAGATCCAGACGTCTCAGAACAAGTTGGAACAGT  
>HPV63\_Mu\_9626605\_nt7221\_Genome\_Tile\_rc|1  
CAGGGAAACCACAAACGGTTCGCGCCTACCACTTTCGTCTTTGGCAGTAACGACAGCGGT  
>HPV63\_Mu\_9626605\_nt7241\_Genome\_Tile\_rc|1  
TAAAGAGTTTCTGCTAGCCCCAGGGAAACCACAAACGGTTCGCGCCTACCACTTTCGTCT  
>HPV41\_Nu\_9626041\_nt0001\_Genome\_Tile\_rc|1  
GTGTGTTTTGTAACGAATTCGTTACAAGAAATAACACGAAAGGGCGATGATTATGATTGT  
>HPV41\_Nu\_9626041\_nt0021\_Genome\_Tile\_rc|1  
CTCTATCTTATATACTGTGTGTGTGTTTTGTAACGAATTCGTTACAAGAAATAACACGAA  
>HPV41\_Nu\_9626041\_nt0061\_Genome\_Tile\_rc|1  
CACCGCTTGTGATGCCATCTGTGGTGTACCAATCCGTTCTCTATCTTATATACTGTGT  
>HPV41\_Nu\_9626041\_nt0201\_Genome\_Tile\_rc|1  
ATCCAATACGCTAAGGATCTTATAGCAATAATGGCAGCAGAGCTGTATGCATGGATAAGT  
>HPV41\_Nu\_9626041\_nt0241\_Genome\_Tile\_rc|1  
CCCAGGATAAGTACAGACAGCTCTGGTCGAAAGCGTAAATATCCAATACGCTAAGGATCT  
>HPV41\_Nu\_9626041\_nt0281\_Genome\_Tile\_rc|1  
CTAGTACACTGAGAACAAATACCCGTTGGCCCCCTTCTCCCCAGGATAAGTACAGACAG  
>HPV41\_Nu\_9626041\_nt0301\_Genome\_Tile\_rc|1  
ACTCCAGCCTTGCAAGCACTCTAGTACACTGAGAACAAATACCCGTTGGCCCCCTTCTC  
>HPV41\_Nu\_9626041\_nt0321\_Genome\_Tile\_rc|1  
CACTTCGTGCCGTGCAGTGAAGTCCAGCCTTGCAAGCACTCTAGTACACTGAGAACAAAT  
>HPV41\_Nu\_9626041\_nt0361\_Genome\_Tile\_rc|1  
TCTGTCTTATAAAGTGCGGCAGACGGCTGGCTGCACAAGACACTTCGTGCCGTGCAGTGA  
>HPV41\_Nu\_9626041\_nt0381\_Genome\_Tile\_rc|1  
CACCTCAAGGTCGCTGAGGCTCTGTCTTATAAAGTGCGGCAGACGGCTGGCTGCACAAGA  
>HPV41\_Nu\_9626041\_nt0401\_Genome\_Tile\_rc|1  
GCTAGGCACCTCACACACCTCACCTCAAGGTCGCTGAGGCTCTGTCTTATAAAGTGCGGC  
>HPV41\_Nu\_9626041\_nt0461\_Genome\_Tile\_rc|1  
ATTCTATGCACAGACAAGTCTTCCCGCAATATGTAATCCTTTTCCACAGATTGTAGAAGA  
>HPV41\_Nu\_9626041\_nt0481\_Genome\_Tile\_rc|1  
TTCCCCCTCCAGATCCCGCCAATTCTATGCACAGACAAGTCTTCCCGCAATATGTAATCCT  
>HPV41\_Nu\_9626041\_nt0501\_Genome\_Tile\_rc|1  
TACCATACATCGAACACAAGTTCCCTCCAGATCCCGCCAATTCTATGCACAGACAAGTC  
>HPV41\_Nu\_9626041\_nt0541\_Genome\_Tile\_rc|1  
TACAGCAAACAGTATATTAGTCTCACAGCTAATACAGTCCTACCATACATCGAACACAAG  
>HPV41\_Nu\_9626041\_nt0561\_Genome\_Tile\_rc|1  
GCACGATTACAGCAATACAATACAGCAAACAGTATATTAGTCTCACAGCTAATACAGTCC  
>HPV41\_Nu\_9626041\_nt0581\_Genome\_Tile\_rc|1

TACAGGGTATAGCAATTTACGCACGATTACAGCAATACAATACAGCAAACAGTATATTAG  
>HPV41\_Nu\_9626041\_nt0601\_Genome\_Tile\_rc|1  
ACACTATTCCCTCTCATTATTACAGGGTATAGCAATTTACGCACGATTACAGCAATACAA  
>HPV41\_Nu\_9626041\_nt0621\_Genome\_Tile\_rc|1  
GCACAATTTCTTGCAGGTCAACACTATTCCCTCTCATTATTACAGGGTATAGCAATTTAC  
>HPV41\_Nu\_9626041\_nt0681\_Genome\_Tile\_rc|1  
CATCAGAATGCTCCCCCTGAATGCACTGCAGCATTTCTCAGGTACCTCCCCCTGCTGAACAA  
>HPV41\_Nu\_9626041\_nt0761\_Genome\_Tile\_rc|1  
CTCTACCAGGTATAATGTTCTCCTGGGTGTGGGGACTTGCTGCACCTGTTCCCGCTCCTC  
>HPV41\_Nu\_9626041\_nt0801\_Genome\_Tile\_rc|1  
ATACAAATCGTATGATAGCCTGGCAAAATGGACACTGACTCTCTACCAGGTATAATGTTCT  
>HPV41\_Nu\_9626041\_nt0861\_Genome\_Tile\_rc|1  
CAAGGTGACTGTTGACCAGGAGTGCCTGTAGATTCCGTATCCCAGTGTTGCTTGCTACGC  
>HPV41\_Nu\_9626041\_nt0901\_Genome\_Tile\_rc|1  
TGGACGCCATTCTGCTCGACACAGGCGTGACAAGCGAGGTCAAGGTGACTGTTGACCAGG  
>HPV41\_Nu\_9626041\_nt0941\_Genome\_Tile\_rc|1  
TTCTCTTTGTTTTCATTGCCATTGCCGGTGTCTGAGACCCTGGACGCCATTCTGCTCGAC  
>HPV41\_Nu\_9626041\_nt1081\_Genome\_Tile\_rc|1  
GCACAGAAGCATCATCCACAAGGTCTTCCACCAAGCTATCCTCCATACTTTCCTCATCGT  
>HPV41\_Nu\_9626041\_nt1121\_Genome\_Tile\_rc|1  
ACAGTTTGGGCATGAAACAGCGACAAGGAATTTCCCTGATGCACAGAAGCATCATCCACA  
>HPV41\_Nu\_9626041\_nt1141\_Genome\_Tile\_rc|1  
TCTCTCCCTCGTATTCCCTCGACAGTTTGGGCATGAAACAGCGACAAGGAATTTCCCTGAT  
>HPV41\_Nu\_9626041\_nt1161\_Genome\_Tile\_rc|1  
CTTTTCGTTTTAGGCTCTGGATCTCTCCCTCGTATTCCTCGACAGTTTGGGCATGAAACAG  
>HPV41\_Nu\_9626041\_nt1181\_Genome\_Tile\_rc|1  
TGCAAGGGACTCAGGATAAACTTTTCGTTTTAGGCTCTGGATCTCTCCCTCGTATTCCTCG  
>HPV41\_Nu\_9626041\_nt1201\_Genome\_Tile\_rc|1  
TTAGTTCTGCCACATCCCTATGCAAGGGACTCAGGATAAACTTTTCGTTTTAGGCTCTGGA  
>HPV41\_Nu\_9626041\_nt1241\_Genome\_Tile\_rc|1  
CCACGGTTTTCTTCCAGGGAAACACCCGCCAGACGCGGGCTTAGTTCTGCCACATCCCTA  
>HPV41\_Nu\_9626041\_nt1261\_Genome\_Tile\_rc|1  
GAGATTTGCGAGCCTTTTTTCCCACGGTTTTCTTCCAGGGAAACACCCGCCAGACGCGGGC  
>HPV41\_Nu\_9626041\_nt1321\_Genome\_Tile\_rc|1  
TACTAGATAGCTGGGAGACTTCCACTGCGCTGCTGTCTATGCCACTGTCATCGTGGAACA  
>HPV41\_Nu\_9626041\_nt1361\_Genome\_Tile\_rc|1  
GGTTTTAGGCAGCCGGATGTCTGGCCCTGGAGCTGATGGCGTACTAGATAGCTGGGAGACT  
>HPV41\_Nu\_9626041\_nt1381\_Genome\_Tile\_rc|1  
GCTCTAGATCTATATCTGAGGGTTTAGGCAGCCGGATGTCTGGCCCTGGAGCTGATGGCG  
>HPV41\_Nu\_9626041\_nt1441\_Genome\_Tile\_rc|1  
CGTACACAGCTTTAAATTTGCTATACATATGCGTACAGCGCTGGCGGCTTTGGAACAGTG  
>HPV41\_Nu\_9626041\_nt1461\_Genome\_Tile\_rc|1  
TATATCTGTAAAGCTAACCCCGTACACAGCTTTAAATTTGCTATACATATGCGTACAGCG  
>HPV41\_Nu\_9626041\_nt1501\_Genome\_Tile\_rc|1  
AATGCTGTGATGTTGTTTTGTGCGTTTTGAATGGCCTGGTTATATCTGTAAAGCTAACCC  
>HPV41\_Nu\_9626041\_nt1541\_Genome\_Tile\_rc|1  
ATCTCACTATCAAAAGCTAAATAGTAGGCGGCCACAACCCAATGCTGTGATGTTGTTTTG  
>HPV41\_Nu\_9626041\_nt1561\_Genome\_Tile\_rc|1  
GCAAAACCTCCATAGCACTTATCTCACTATCAAAAGCTAAATAGTAGGCGGCCACAACCC  
>HPV41\_Nu\_9626041\_nt1601\_Genome\_Tile\_rc|1  
TCATTGTTGTCAATGTATAAAAATTGGCATTGTTGTGCGCAGCAAAACCTCCATAGCACTT  
>HPV41\_Nu\_9626041\_nt1621\_Genome\_Tile\_rc|1  
GGAAGAACAGTATAATGCCATCATTGTTGTCAATGTATAAAAATTGGCATTGTTGTGCGCA  
>HPV41\_Nu\_9626041\_nt1681\_Genome\_Tile\_rc|1  
GGAAATTGGCTGTGAACCAATTGTACACTGTAGTCCTAGATTTCTGCACGTTGTATTCCA

>HPV41\_Nu\_9626041\_nt1701\_Genome\_Tile\_rc|1  
CATTCTATTTTCATTATAATGGAAATTGGCTGTGAACCAATTGTACACTGTAGTCCTAGA  
>HPV41\_Nu\_9626041\_nt1721\_Genome\_Tile\_rc|1  
GTCCTTGGCGGATTAGCTAGCATTCTATTTTCATTATAATGGAAATTGGCTGTGAACCAA  
>HPV41\_Nu\_9626041\_nt1741\_Genome\_Tile\_rc|1  
AAGCAGCAGGCATGTTTCGTGTCTTGGCGGATTAGCTAGCATTCTATTTTCATTATAAT  
>HPV41\_Nu\_9626041\_nt1761\_Genome\_Tile\_rc|1  
AAATCTATGATAGAAGAATAAAGCAGCAGGCATGTTTCGTGTCTTGGCGGATTAGCTAG  
>HPV41\_Nu\_9626041\_nt1781\_Genome\_Tile\_rc|1  
TTTATACCCCTGTACCCATAAATCTATGATAGAAGAATAAAGCAGCAGGCATGTTTCGT  
>HPV41\_Nu\_9626041\_nt1801\_Genome\_Tile\_rc|1  
TTTCTGGCATTGCGCCATGTTTTATACCCCTGTACCCATAAATCTATGATAGAAGAATA  
>HPV41\_Nu\_9626041\_nt1841\_Genome\_Tile\_rc|1  
TCTGTCTGTGATTAGACACCACGCACTGGTTTACAATTATTTCTGGCATTGCGCCATGT  
>HPV41\_Nu\_9626041\_nt1861\_Genome\_Tile\_rc|1  
TACGTGATAATTCAAAGGTGTCTGTCTGCTGATTAGACACCACGCACTGGTTTACAATTA  
>HPV41\_Nu\_9626041\_nt1901\_Genome\_Tile\_rc|1  
TGTTTCATCTTGCAGATCGTTGTCCAGTGCCCACTGTACCATACGTGATAATTCAAAGGTG  
>HPV41\_Nu\_9626041\_nt1921\_Genome\_Tile\_rc|1  
CATACTCTAAAGCTAACATATGTTTCATCTTGCAGATCGTTGTCCAGTGCCCACTGTACCA  
>HPV41\_Nu\_9626041\_nt1941\_Genome\_Tile\_rc|1  
ATCACTTTCAGCAAGCAAAGCATACTCTAAAGCTAACATATGTTTCATCTTGCAGATCGTT  
>HPV41\_Nu\_9626041\_nt1961\_Genome\_Tile\_rc|1  
AAAAAAGCCCGCGCATTGCCATCACTTTTCAGCAAGCAAAGCATACTCTAAAGCTAACATA  
>HPV41\_Nu\_9626041\_nt2001\_Genome\_Tile\_rc|1  
GCTACAATTCTTCACTATCATTGGCTGATTATTCTGCTTTAAAAAAGCCCGCGCATTGCC  
>HPV41\_Nu\_9626041\_nt2021\_Genome\_Tile\_rc|1  
TTGTAGTGTCTAACCATTATGCTACAATTCTTCACTATCATTGGCTGATTATTCTGCTTT  
>HPV41\_Nu\_9626041\_nt2041\_Genome\_Tile\_rc|1  
TTTTTTCGACCGAGCGCTGTCTTGTAGTGTCTAACCATTATGCTACAATTCTTCACTATCA  
>HPV41\_Nu\_9626041\_nt2061\_Genome\_Tile\_rc|1  
CACATACTGTGAAATAGACATTTTTGCGACCGAGCGCTGTCTTGTAGTGTCTAACCATTAT  
>HPV41\_Nu\_9626041\_nt2081\_Genome\_Tile\_rc|1  
TGGTCCAGACACCGCTTATTCACATACTGTGAAATAGACATTTTTGCGACCGAGCGCTGTC  
>HPV41\_Nu\_9626041\_nt2101\_Genome\_Tile\_rc|1  
TGTTTTTCATCAGCTTCCCATGGTCCAGACACCGCTTATTCACATACTGTGAAATAGACA  
>HPV41\_Nu\_9626041\_nt2121\_Genome\_Tile\_rc|1  
ATGCACAATTCCCCGCCAGCTGTTTTTCATCAGCTTCCCATGGTCCAGACACCGCTTATT  
>HPV41\_Nu\_9626041\_nt2141\_Genome\_Tile\_rc|1  
TGACCTTGATACCTCAGAAAATGCACAATTCCCCGCCAGCTGTTTTTCATCAGCTTCCCCA  
>HPV41\_Nu\_9626041\_nt2161\_Genome\_Tile\_rc|1  
ACATGAAGGGCAGGAATTCCTGACCTTGATACCTCAGAAAATGCACAATTCCCCGCCAGC  
>HPV41\_Nu\_9626041\_nt2181\_Genome\_Tile\_rc|1  
TAGGAAATTGTGCATTTTACACATGAAGGGCAGGAATTCCTGACCTTGATACCTCAGAAA  
>HPV41\_Nu\_9626041\_nt2201\_Genome\_Tile\_rc|1  
GATTTCTTTGGTCTATGGTGTAGGAAATTGTGCATTTTACACATGAAGGGCAGGAATTCC  
>HPV41\_Nu\_9626041\_nt2381\_Genome\_Tile\_rc|1  
TACCTCCAAAACGTGAGGGTCGCATCGTCTATTAGACAGCACCGTGCCCCACGTAATGGT  
>HPV41\_Nu\_9626041\_nt2401\_Genome\_Tile\_rc|1  
CCCTCATGTTTTGGTCCGCGTACCTCCAAAACGTGAGGGTCGCATCGTCTATTAGACAGC  
>HPV41\_Nu\_9626041\_nt2441\_Genome\_Tile\_rc|1  
TGTTTTGCATCAATGGAAATCTCATATCCATCTAGCAGTGCCCTCATGTTTTGGTCCGCG  
>HPV41\_Nu\_9626041\_nt2461\_Genome\_Tile\_rc|1  
TAGTTTGCATTTGGGTTTCTGTGTTTGCATCAATGGAAATCTCATATCCATCTAGCAGTG  
>HPV41\_Nu\_9626041\_nt2481\_Genome\_Tile\_rc|1

TATTATTAATGGTGGTGTCTAGTTTGCATTGGGTTTCTGTGTTTTGCATCAATGGAAAT  
>HPV41\_Nu\_9626041\_nt2501\_Genome\_Tile\_rc|1  
ATAATGTCCTCATTTGTGGTTATTATTAATGGTGGTGTCTAGTTTGCATTGGGTTTCTG  
>HPV41\_Nu\_9626041\_nt2541\_Genome\_Tile\_rc|1  
CATTGTTCTGGTTTGCAGATATTTGAATTCATCTAATCGCATAATGTCCTCATTTGTGGT  
>HPV41\_Nu\_9626041\_nt2581\_Genome\_Tile\_rc|1  
CATTTCCTTTAAGAGGAAATGGCTTGTTAAAGTACACATACATTGTTCTGGTTTGCAGAT  
>HPV41\_Nu\_9626041\_nt2661\_Genome\_Tile\_rc|1  
GTCTTTTAGATTTAGGTGACGCCAAAATTTCCCTAAAAAAGAGTTCCATGTATAACCATC  
>HPV41\_Nu\_9626041\_nt2681\_Genome\_Tile\_rc|1  
CCATCTGACTCATCCTCAGGGTCTTTTAGATTTAGGTGACGCCAAAATTTCCCTAAAAA  
>HPV41\_Nu\_9626041\_nt2701\_Genome\_Tile\_rc|1  
TAATCGTTCCAGGAGTCTCTCCATCTGACTCATCCTCAGGGTCTTTTAGATTTAGGTGAC  
>HPV41\_Nu\_9626041\_nt2721\_Genome\_Tile\_rc|1  
ATCTGCTCTTGTATATAGTCTAATCGTTCAGGAGTCTCTCCATCTGACTCATCCTCAGG  
>HPV41\_Nu\_9626041\_nt2741\_Genome\_Tile\_rc|1  
CTTTCTCATATAGTGTCTAGTATCTGCTCTTGTATATAGTCTAATCGTTCAGGAGTCTCT  
>HPV41\_Nu\_9626041\_nt2761\_Genome\_Tile\_rc|1  
ATCCTCTAGGTCAACACTATCTTTCTCATATAGTGTCTAGTCTGCTCTTGTATATAGTC  
>HPV41\_Nu\_9626041\_nt2781\_Genome\_Tile\_rc|1  
AGATTCCATAGCCTTATATGATCCTCTAGGTCAACACTATCTTTCTCATATAGTGTCTAGT  
>HPV41\_Nu\_9626041\_nt2801\_Genome\_Tile\_rc|1  
TTGCATTTTCCCTCCTTAGCAGATTCCATAGCCTTATATGATCCTCTAGGTCAACACTAT  
>HPV41\_Nu\_9626041\_nt2821\_Genome\_Tile\_rc|1  
CTGTCTGAGTACATACCAGATTGCATTTTCCCTCCTTAGCAGATTCCATAGCCTTATATG  
>HPV41\_Nu\_9626041\_nt2861\_Genome\_Tile\_rc|1  
TTGCCGGCACCGCTCTGCCGCCGACCCTTGCGTGTCTTCCTGTCTGAGTACATACCAGA  
>HPV41\_Nu\_9626041\_nt2901\_Genome\_Tile\_rc|1  
ATTTCTATTGCGAATTTGGCATTGGCTTCCGATACCGTCATTGCCGGCACCGCTCTGCCG  
>HPV41\_Nu\_9626041\_nt2921\_Genome\_Tile\_rc|1  
GTGATTCTAGCTTTATCTGCATTTCTATTGCGAATTTGGCATTGGCTTCCGATACCGTCA  
>HPV41\_Nu\_9626041\_nt2941\_Genome\_Tile\_rc|1  
CGCATAGGGACTGGCCTTTAGTGATTCTAGCTTTATCTGCATTTCTATTGCGAATTTGGC  
>HPV41\_Nu\_9626041\_nt2981\_Genome\_Tile\_rc|1  
ACCGTTCCCTTGGTGGTTTCTTGCAATGACCAGCCCTCGGCCGCATAGGGACTGGCCTTTA  
>HPV41\_Nu\_9626041\_nt3001\_Genome\_Tile\_rc|1  
CCGAGACGGTTCAGCCAAGTACCGTTCCCTTGGTGGTTTCTTGCAATGACCAGCCCTCGGC  
>HPV41\_Nu\_9626041\_nt3021\_Genome\_Tile\_rc|1  
TGCCCTAATTTCTTAAATGTCCGAGACGGTTCAGCCAAGTACCGTTCCCTTGGTGGTTTCT  
>HPV41\_Nu\_9626041\_nt3061\_Genome\_Tile\_rc|1  
AAGGTTTTTCGGGATCATTGTCAAACATTAGGGTAACTGGCTGCCCTAATTTCTTAAATGT  
>HPV41\_Nu\_9626041\_nt3101\_Genome\_Tile\_rc|1  
GTGTAATATAATAAACCCATTTCCACAATACAACCTTCTGTAAGGTTTTTCGGGATCATTGT  
>HPV41\_Nu\_9626041\_nt3121\_Genome\_Tile\_rc|1  
TTTATACCATTCATCTGTTGGTGTAATATAATAAACCCATTTCCACAATACAACCTTCTGT  
>HPV41\_Nu\_9626041\_nt3141\_Genome\_Tile\_rc|1  
TCATCAATGCCACCTCTAGCTTTATACCATTCATCTGTTGGTGTAATATAATAAACCCAT  
>HPV41\_Nu\_9626041\_nt3161\_Genome\_Tile\_rc|1  
CAATGTAGTATATACAGTGTCTCATCAATGCCACCTCTAGCTTTATACCATTCATCTGTTG  
>HPV41\_Nu\_9626041\_nt3181\_Genome\_Tile\_rc|1  
CATTTTAACAGACTCGTGGTCAATGTAGTATATACAGTGTCTCATCAATGCCACCTCTAGC  
>HPV41\_Nu\_9626041\_nt3201\_Genome\_Tile\_rc|1  
ATGTCAAATCTCACATAGTACATTTTAACAGACTCGTGGTCAATGTAGTATATACAGTG  
>HPV41\_Nu\_9626041\_nt3221\_Genome\_Tile\_rc|1  
CGCTAAAGTTCTCCGCTTCCATGTCAAATCTCACATAGTACATTTTAACAGACTCGTGGT

>HPV41\_Nu\_9626041\_nt3241\_Genome\_Tile\_rc|1  
GTAGGTGACAGTGCCTGTCTCGCTAAAGTTCTCCGCTTCCATGTCAAATCTCACATAGTA  
>HPV41\_Nu\_9626041\_nt3301\_Genome\_Tile\_rc|1  
GGAGGAGCTGTCGGTAACAGTTACAGGTTACAGGTACATTTACCAGGGCGCTGCCTAGCCG  
>HPV41\_Nu\_9626041\_nt3321\_Genome\_Tile\_rc|1  
TTTGGGGTTCTCTCCCTCGTGGAGGAGCTGTCGGTAACAGTTACAGGTTACAGGTACATTT  
>HPV41\_Nu\_9626041\_nt3361\_Genome\_Tile\_rc|1  
CTCGTTTCTGCGTCGTCTCGACCCCTGCGGTCTAGTACCTTTGGGGTTCTCTCCCTCGT  
>HPV41\_Nu\_9626041\_nt3401\_Genome\_Tile\_rc|1  
GTCTTCGCTTAGGGGCTGGGGCGACCGGCTCCCCGTTTCTCGTTTCTGCGTCGTCTCG  
>HPV41\_Nu\_9626041\_nt3461\_Genome\_Tile\_rc|1  
CAGGCGACGCCGCGGTCTGCGTTGGGCCTTCGGGGAGGATCTGCGTCCGTAAGCTCCTC  
>HPV41\_Nu\_9626041\_nt3501\_Genome\_Tile\_rc|1  
CCAGAAAGTGAAGTCAGACGATCCTCCGTTTCTCTAGAAACAGGCGACGCCGCGGTCTCTG  
>HPV41\_Nu\_9626041\_nt3581\_Genome\_Tile\_rc|1  
AGTGTCTCTTCTGCTGGAGCAACACCCGACAGTTTCTTTTGAAGTGCTCTATGTCTGACTC  
>HPV41\_Nu\_9626041\_nt3681\_Genome\_Tile\_rc|1  
AAAGTAGTCCCCAGATACATTATGTACCGCTATACTTGTTTTCCATTTGTACCTTAAG  
>HPV41\_Nu\_9626041\_nt3701\_Genome\_Tile\_rc|1  
CGTCAGACTCCGTCCATGTGAAAGTAGTCCCCAGATACATTATGTACCGCTATACTTGT  
>HPV41\_Nu\_9626041\_nt3721\_Genome\_Tile\_rc|1  
CGACCCACACCGTTCTGTCCCGTCAGACTCCGTCCATGTGAAAGTAGTCCCCAGATACAT  
>HPV41\_Nu\_9626041\_nt3761\_Genome\_Tile\_rc|1  
CTCTTTTTTGTTTTCATTAGAGAAAGCACAAAAAAGCGCCCCGACCCACACCGTTCTGTCC  
>HPV41\_Nu\_9626041\_nt3781\_Genome\_Tile\_rc|1  
GACAGATTTGAGGAACCTTTTCTCTTTTGTTCATTAGAGAAAGCACAAAAAAGCGCCC  
>HPV41\_Nu\_9626041\_nt3801\_Genome\_Tile\_rc|1  
CCAATGTTTTTAGGAATCTTGACAGATTTGAGGAACCTTTTCTCTTTTGTTCATTAGAG  
>HPV41\_Nu\_9626041\_nt3841\_Genome\_Tile\_rc|1  
ATACACAGGTCACAGCTTTTCTGCGTGTGCGGAAACAGCCCAATGTTTTTAGGAATCTT  
>HPV41\_Nu\_9626041\_nt3901\_Genome\_Tile\_rc|1  
CTTATACAGTTGTTTCAGGATTAGCGCGTTTAACCCTTTCCTAGCAAGCATTTGTTTAATG  
>HPV41\_Nu\_9626041\_nt3921\_Genome\_Tile\_rc|1  
CCCCCGTTGCTTTGCATGTCTTATACAGTTGTTTCAGGATTAGCGCGTTTAACCCTTTC  
>HPV41\_Nu\_9626041\_nt3981\_Genome\_Tile\_rc|1  
AATATACTATCAGCAGGTGTAGTTTGCTCATAGCGTTTAATAACATCGGGTGGACAATCG  
>HPV41\_Nu\_9626041\_nt4001\_Genome\_Tile\_rc|1  
CCCCTACACTCCCATACTTTAATATACTATCAGCAGGTGTAGTTTGCTCATAGCGTTTAA  
>HPV41\_Nu\_9626041\_nt4181\_Genome\_Tile\_rc|1  
GTGCCATGGGAAGCAGAGGTATTTCTCTGCCAGTGAAGGCCCCCTGATTCAATTGGCA  
>HPV41\_Nu\_9626041\_nt4221\_Genome\_Tile\_rc|1  
ACTGACGGCCGAAAGGGATCTGTAGGCCTTGGCACACGGGGTGCCATGGGAAGCAGAGGT  
>HPV41\_Nu\_9626041\_nt4341\_Genome\_Tile\_rc|1  
CTAGGAATGGTTGTGATTTCTGTGTTGCCATTGTCAAATGGTGCAGCGTCTGTAGGGAAA  
>HPV41\_Nu\_9626041\_nt4361\_Genome\_Tile\_rc|1  
CCCCACTAACATCATATTGGCTAGGAATGGTTGTGATTTCTGTGTTGCCATTGTCAAATG  
>HPV41\_Nu\_9626041\_nt4381\_Genome\_Tile\_rc|1  
TATCTGAATGTCAACCCCTCCCCACTAACATCATATTGGCTAGGAATGGTTGTGATTTT  
>HPV41\_Nu\_9626041\_nt4401\_Genome\_Tile\_rc|1  
TTCACACTAGGGAGTTCAATTATCTGAATGTCAACCCCTCCCCACTAACATCATATTGG  
>HPV41\_Nu\_9626041\_nt4441\_Genome\_Tile\_rc|1  
GTTGTATTGTGTGCGGGTAACAACCGAGGGACCGGGGTCATTACACTAGGGAGTTCAAT  
>HPV41\_Nu\_9626041\_nt4461\_Genome\_Tile\_rc|1  
TCCACCTCAAACGTTGGATTGTTGTATTGTGTGCGGGTAACAACCGAGGGACCGGGGTCA  
>HPV41\_Nu\_9626041\_nt4481\_Genome\_Tile\_rc|1

CACTAATGTCAGTGGACACCTCCACCTCAAACGTTGGATTGTTGTATTGTGTGCGGGTAA  
>HPV41\_Nu\_9626041\_nt4501\_Genome\_Tile\_rc|1  
GTCCGTTGATGAGGTTTCTCCACTAATGTCAGTGGACACCTCCACCTCAAACGTTGGATT  
>HPV41\_Nu\_9626041\_nt4541\_Genome\_Tile\_rc|1  
CTACGGATGTGCCACCGCTTTCAGCTCCTACAATAATGTTGTCCGTTGATGAGGTTTCTC  
>HPV41\_Nu\_9626041\_nt4561\_Genome\_Tile\_rc|1  
TATCAGTTCAGCATTGTACCTACGGATGTGCCACCGCTTTCAGCTCCTACAATAATGTT  
>HPV41\_Nu\_9626041\_nt4601\_Genome\_Tile\_rc|1  
TTGTGTCAATTGTGTCCCCCGGGATATATCTAGCAAAGGTATCAGTTCAGCATTGTAC  
>HPV41\_Nu\_9626041\_nt4621\_Genome\_Tile\_rc|1  
CTCGCCAGGGGCAAGTATTGTTGTGTCAATTGTGTCCCCCGGGATATATCTAGCAAAGG  
>HPV41\_Nu\_9626041\_nt4661\_Genome\_Tile\_rc|1  
GCACACGTTCAAGGAGTGCTGGTCACAAAGGCAGTCTCCTCCTCGCCAGGGGCAAGTATTG  
>HPV41\_Nu\_9626041\_nt4681\_Genome\_Tile\_rc|1  
AGGTAATCGCTCCTGTATAGGCACACGTTCAAGGAGTGCTGGTCACAAAGGCAGTCTCCTC  
>HPV41\_Nu\_9626041\_nt4721\_Genome\_Tile\_rc|1  
TAACTCGCACTTGCTGATACTGTCTGCCATAGGGCCTAATAGGTAATCGCTCCTGTATAG  
>HPV41\_Nu\_9626041\_nt4761\_Genome\_Tile\_rc|1  
GAGACAAGTACTGCAGCGCTGTCTAAAAATTCAGGGTCGGTAACTCGCACTTGCTGATAC  
>HPV41\_Nu\_9626041\_nt4781\_Genome\_Tile\_rc|1  
CAAACACTGGATTCTCTAAAGAGACAAGTACTGCAGCGCTGTCTAAAAATTCAGGGTCGG  
>HPV41\_Nu\_9626041\_nt4861\_Genome\_Tile\_rc|1  
GCGACGCACGTCCCGCAGGTCTGTGTCACTACGTAGTGCCTGCTGCAGATCATCCTCAA  
>HPV41\_Nu\_9626041\_nt4881\_Genome\_Tile\_rc|1  
TGGTAATAAGGTCTACTGAGGCGACGCACGTCCCGCAGGTCTGTGTCACTACGTAGTGCC  
>HPV41\_Nu\_9626041\_nt4941\_Genome\_Tile\_rc|1  
GTGGATATAGTACCCCGACGTTGCCCGAGCGACTAACACGAAGGCCAGTAGTGCGCCTC  
>HPV41\_Nu\_9626041\_nt4961\_Genome\_Tile\_rc|1  
CTACCTGAACACCAGAGCGCGTGGATATAGTACCCCGACGTTGCCCGAGCGACTAACAC  
>HPV41\_Nu\_9626041\_nt4981\_Genome\_Tile\_rc|1  
GAAAAAATGAGCAGCGGAGCCTACCTGAACACCAGAGCGCGTGGATATAGTACCCCGACG  
>HPV41\_Nu\_9626041\_nt5021\_Genome\_Tile\_rc|1  
CAATTGGCTCAATAGCCTGGCCGATTGGACTAATGTCCTGGAAAAAATGAGCAGCGGAGC  
>HPV41\_Nu\_9626041\_nt5041\_Genome\_Tile\_rc|1  
TACATCTAGTTCAATTGCATCAATTGGCTCAATAGCCTGGCCGATTGGACTAATGTCCTG  
>HPV41\_Nu\_9626041\_nt5081\_Genome\_Tile\_rc|1  
CTCCTCTCACAATAGTCCCCTCACCGGATTGCTCACCCAGTACATCTAGTTCAATTGCAT  
>HPV41\_Nu\_9626041\_nt5101\_Genome\_Tile\_rc|1  
CTCAATAGAAGGCGTAGGGTCTCCTCTCACAATAGTCCCCTCACCGGATTGCTCACCCAG  
>HPV41\_Nu\_9626041\_nt5121\_Genome\_Tile\_rc|1  
GCGGTTAGTCCATATGTCTTGCTCAATAGAAGGCGTAGGGTCTCCTCTCACAATAGTCCCC  
>HPV41\_Nu\_9626041\_nt5141\_Genome\_Tile\_rc|1  
TTTCAATGTTGTCCCCCAAAGCGGTTAGTCCTATGTCTTGCTCAATAGAAGGCGTAGGGT  
>HPV41\_Nu\_9626041\_nt5161\_Genome\_Tile\_rc|1  
ATCTATTTCTGCAATTCATTTTCAATGTTGTCCCCCAAAGCGGTTAGTCCTATGTCTTG  
>HPV41\_Nu\_9626041\_nt5181\_Genome\_Tile\_rc|1  
TCACCATCCGCAGTTAATAAATCTATTTCTGCAATTCATTTTCAATGTTGTCCCCCAA  
>HPV41\_Nu\_9626041\_nt5201\_Genome\_Tile\_rc|1  
CTCTGCCCTCCTGGTCTTCTTCACCATCCGCAGTTAATAAATCTATTTCTGCAATTCAT  
>HPV41\_Nu\_9626041\_nt5261\_Genome\_Tile\_rc|1  
TAGGTATAGTCATAATATCAACCACCTCATCATTGCCAGTGGAATAACCAACTGCAGGT  
>HPV41\_Nu\_9626041\_nt5281\_Genome\_Tile\_rc|1  
GTCATCCCCGCTGCACGTATAGGTATAGTCATAATATCAACCACCTCATCATTGCCAGT  
>HPV41\_Nu\_9626041\_nt5301\_Genome\_Tile\_rc|1  
AAAATAAATACTGAAGGCCTGTCATCCCCGCCTGCACGTATAGGTATAGTCATAATATCA



>HPV41\_Nu\_9626041\_nt5321\_Genome\_Tile\_rc|1  
TGTGAGTGCCATCATCGCTAAAAATAAATACTGAAGGCCTGTCATCCCCGCCTGCACGTA  
>HPV41\_Nu\_9626041\_nt7041\_Genome\_Tile\_rc|1  
ACCAGCAATTCGTTTAAAGCCTTCCGGCGGCGCTTAGTAGGCCGCTGTAGGTAGTAAGGG  
>HPV41\_Nu\_9626041\_nt7061\_Genome\_Tile\_rc|1  
CGAGGACACCGCACCACAATACCAGCAATTCGTTTAAAGCCTTCCGGCGGCGCTTAGTAGG  
>HPV41\_Nu\_9626041\_nt7141\_Genome\_Tile\_rc|1  
GAAATACATGCGAAGTAAATAGATAATGGAGTGGTGTACCCTGGACTGACCAAGTGATTA  
>HPV41\_Nu\_9626041\_nt7161\_Genome\_Tile\_rc|1  
CCATACAGGAACATAACAGAGAAATACATGCGAAGTAAATAGATAATGGAGTGGTGTACC  
>HPV41\_Nu\_9626041\_nt7201\_Genome\_Tile\_rc|1  
GCACAGCGTTACCAACATATTTTATTAACACATTCATAACCCATACAGGAACATAACAGA  
>HPV41\_Nu\_9626041\_nt7221\_Genome\_Tile\_rc|1  
ATGAACGTGAACAAACCCGTGCACAGCGTTACCAACATATTTTATTAACACATTCATAAC  
>HPV41\_Nu\_9626041\_nt7241\_Genome\_Tile\_rc|1  
GGGGTGCCAAATCATGAGACATGAACGTGAACAAACCCGTGCACAGCGTTACCAACATAT  
>HPV41\_Nu\_9626041\_nt7281\_Genome\_Tile\_rc|1  
GGATTATATCTGCGATCCCCCGGGCGGCGGCGGAATACAGGGGTGCCAAATCATGAGAC  
>HPV41\_Nu\_9626041\_nt7301\_Genome\_Tile\_rc|1  
TTGGAACGCTTTGGGTTTGGGGATTATATCTGCGATCCCCCGGGCGGCGGGAATACA  
>HPV41\_Nu\_9626041\_nt7321\_Genome\_Tile\_rc|1  
GCCAGAGACGTTTGCCAATGTTGGAACGCTTTGGGTTTGGGGATTATATCTGCGATCCCC  
>HPV41\_Nu\_9626041\_nt7341\_Genome\_Tile\_rc|1  
ACCGTTTTCAGTTGTATCGGGGCCAGAGACGTTTGCCAATGTTGGAACGCTTTGGGTTTGG  
>HPV41\_Nu\_9626041\_nt7361\_Genome\_Tile\_rc|1  
TGGGGCTATTGGCAAGACAGACCGTTTTCAGTTGTATCGGGGCCAGAGACGTTTGCCAATG  
>HPV41\_Nu\_9626041\_nt7381\_Genome\_Tile\_rc|1  
TCAGTTGAATCCCCGCCAGATGGGGCTATTGGCAAGACAGACCGTTTTCAGTTGTATCGGG  
>HPV41\_Nu\_9626041\_nt7421\_Genome\_Tile\_rc|1  
GTTCCAATAACAAAAATGTTACTTGGCAGTACACACCGTTTTCAGTTGAATCCCCGCCAGA  
>HPV41\_Nu\_9626041\_nt7481\_Genome\_Tile\_rc|1  
GTTTTGGCAATAAACTGTCTTCGCGCCTAAATCCTTGCGCTTCCGCCAGCACCGGAGGC  
>HPV72\_Alpha\_1491683\_nt0061\_Genome\_Tile\_rc|1  
TGTGCAGTCCCATAGGCATTGCTGATTTGCTGAGTTCACAGTTCCTTATATATGTACCT  
>HPV72\_Alpha\_1491683\_nt0621\_Genome\_Tile\_rc|1  
CTTGTTCTACAAGTTGCTCCTGCACACCAACACCGTCCCTCTCATCTCTGACTCTGACT  
>HPV72\_Alpha\_1491683\_nt1261\_Genome\_Tile\_rc|1  
AACGGCGCCGCTCCCCCCTTTGTATGCTGTGTACCCCCGATACCTGGCTTTCTGGTGC  
>HPV72\_Alpha\_1491683\_nt1281\_Genome\_Tile\_rc|1  
CGCTCCTCTTCCGCTTCCTGAACGGCGCCGCTCCCCCCTTTGTATGCTGTGTACCCCC  
>HPV72\_Alpha\_1491683\_nt1341\_Genome\_Tile\_rc|1  
GCTCTCTCTGGCGTTTGTGTGTCTGTGCACTACACTGCGCCTCACCATCCCCCCCCACA  
>HPV72\_Alpha\_1491683\_nt1381\_Genome\_Tile\_rc|1  
ACGCAAACTACTAACCTTAAATATTTCTAGTACGTCTGCTGCTCTCTCTGGCGTTTGCTG  
>HPV72\_Alpha\_1491683\_nt1401\_Genome\_Tile\_rc|1  
AATTTATGCAGTAATGTGACACGCAAACTACTAACCTTAAATATTTCTAGTACGTCTGCT  
>HPV72\_Alpha\_1491683\_nt2541\_Genome\_Tile\_rc|1  
CTTATGCATAAAATTTAAACAACACTATTCTACTGTGCAAAATATTTAAATGCCTGGTCTTC  
>HPV72\_Alpha\_1491683\_nt2581\_Genome\_Tile\_rc|1  
TTAGGGTATATACGGGATCACCGTTGCTTTTAAATGGGCACTTATGCATAAAATTTAAACA  
>HPV72\_Alpha\_1491683\_nt3101\_Genome\_Tile\_rc|1  
GTTTCGTCTCTGTACTTTGCACATAAAATACACCCCAGCTCACATACTCCACTGCTTTTA  
>HPV72\_Alpha\_1491683\_nt3141\_Genome\_Tile\_rc|1  
AGCCCATGATATGACACATGTCCTTGTAATTTATACCACTGTTTCGTCTCTGTACTTTGC  
>HPV72\_Alpha\_1491683\_nt3161\_Genome\_Tile\_rc|1

GACCCTGAAATTCATAATATAGCCCATGATATGACACATGTCCTTGTACTTTATACCACT  
>HPV72\_Alpha\_1491683\_nt3181\_Genome\_Tile\_rc|1  
TGTTACATAGTACTGTTTCTGACCCTGAAATTCATAATATAGCCCATGATATGACACATG  
>HPV72\_Alpha\_1491683\_nt3201\_Genome\_Tile\_rc|1  
TTTCTGGCTTCGTGTCCAAATGTTACATAGTACTGTTTCTGACCCTGAAATTCATAATAT  
>HPV72\_Alpha\_1491683\_nt3521\_Genome\_Tile\_rc|1  
CACTGTCACGGTTGACCCACTGGTCAGCACTGTCACGCCGTTGCCTGCAGATGTCTCTTT  
>HPV72\_Alpha\_1491683\_nt3541\_Genome\_Tile\_rc|1  
CCTTGCTTGTGTGTGCAGTCACTGTCACGGTTGACCCACTGGTCAGCACTGTCACGCCG  
>HPV72\_Alpha\_1491683\_nt3561\_Genome\_Tile\_rc|1  
CCGTGACTGTTACAGATGTCCCTTGCTTGTGTGTGCAGTCACTGTCACGGTTGACCCAC  
>HPV72\_Alpha\_1491683\_nt3661\_Genome\_Tile\_rc|1  
AGAGGATGCTTTTAAAAACAAGTTAGGCACTGACTGCTGAAGCCTATACCGAAAACACTT  
>HPV72\_Alpha\_1491683\_nt3741\_Genome\_Tile\_rc|1  
GTCCGTTGGTCAGTATCCACATACCACAGTGTACAAATGCACATTTTGTGTGTACCCC  
>HPV72\_Alpha\_1491683\_nt3861\_Genome\_Tile\_rc|1  
AATGTTGCAGGTGTGGTTCTATACACTGGTTGCCATCGCAACAAACATTATATACACATT  
>HPV72\_Alpha\_1491683\_nt3881\_Genome\_Tile\_rc|1  
GGATTGCTTCTGCCTTACATAATGTGCAGGTGTGGTTCTATACACTGGTTGCCATCGCA  
>HPV72\_Alpha\_1491683\_nt4061\_Genome\_Tile\_rc|1  
GGGTGGATTATAAGTCACCTATGTACCACATCACCTGCATATATACAAAACAATCCTA  
>HPV72\_Alpha\_1491683\_nt4081\_Genome\_Tile\_rc|1  
AATAGCAGCATGTAATGGCTGGGTGGATTATAAGTCACCTATGTACCACATCACCTGCAT  
>HPV72\_Alpha\_1491683\_nt4141\_Genome\_Tile\_rc|1  
ATTGCCCACTACAACAGGATACATATTACATACAAGATACACAAGGAACACTATTTACAC  
>HPV72\_Alpha\_1491683\_nt4161\_Genome\_Tile\_rc|1  
ATTAATGCACCCCCATCCGTATTGCCCACTACAACAGGATACATATTACATACAAGATAC  
>HPV72\_Alpha\_1491683\_nt4181\_Genome\_Tile\_rc|1  
AATTATCGTCTCGTAGTACAATTAATGCACCCCCATCCGTATTGCCCACTACAACAGGAT  
>HPV72\_Alpha\_1491683\_nt4221\_Genome\_Tile\_rc|1  
ACAATGATTATTAACATACACAAGAAGAACCACAATCCACAATTATCGTCTCGTAGTACA  
>HPV72\_Alpha\_1491683\_nt4241\_Genome\_Tile\_rc|1  
GCAACCTATATAGCAACACTACAATGATTATTAACATACACAAGAAGAACCACAATCCAC  
>HPV72\_Alpha\_1491683\_nt4261\_Genome\_Tile\_rc|1  
AAAAGGAAGGGATCAGTGTAGCAACCTATATAGCAACACTACAATGATTATTAACATACA  
>HPV72\_Alpha\_1491683\_nt4301\_Genome\_Tile\_rc|1  
AACAAAACAAAACAAAATAAAAAGGAGGTGGGAATACACAAAAGGAAGGGATCAGTGTA  
>HPV72\_Alpha\_1491683\_nt4321\_Genome\_Tile\_rc|1  
GCAAAAAAATAAAAAACAAAACAAAACAAAATAAAAAGGAGGTGGGAATACAC  
>HPV72\_Alpha\_1491683\_nt4341\_Genome\_Tile\_rc|1  
ATAATGTTTATTATAAAAATGCAAAAAAATAAAAACAAAACAAAACAAAATA  
>HPV72\_Alpha\_1491683\_nt4361\_Genome\_Tile\_rc|1  
AGCTTGGGTCATTTTGGCAGATAATGTTTATTATAAAAATGCAAAAAAATAAAAACAAA  
>HPV72\_Alpha\_1491683\_nt5101\_Genome\_Tile\_rc|1  
AGAGACTGGGGTCGAGACAAAAGGCAGGGTTAGTAACCTAACCTGTTGATTAGCCTTG  
>HPV72\_Alpha\_1491683\_nt5381\_Genome\_Tile\_rc|1  
CGTAGAGGAGGCCAAGGATTGCATTTCAATAGTATCAGATGAAATGGGGCTAATGTCCTG  
>HPV72\_Alpha\_1491683\_nt5401\_Genome\_Tile\_rc|1  
TCATATGTTATGTCTGGCTGCGTAGAGGAGGCCAAGGATTGCATTTCAATAGTATCAGAT  
>HPV72\_Alpha\_1491683\_nt5461\_Genome\_Tile\_rc|1  
GATGTAGAAGACACAGAAGCACGCGCGGGGTTCCCTAAATCAGGGTCAGCATAAATG  
>HPV72\_Alpha\_1491683\_nt5501\_Genome\_Tile\_rc|1  
AGAAACAGCAGACGCTGCAGACAGGGACGGGCTGTGCAATGATGTAGAAGACACAGAAGC  
>HPV72\_Alpha\_1491683\_nt5561\_Genome\_Tile\_rc|1  
AGAGGAGGCAGGGATGTGTGGCCCTAAGGACAAGGGAAGTGTACATTGTCATACTGGC

>HPV72\_Alpha\_1491683\_nt5581\_Genome\_Tile\_rc|1  
GACAAATCAATGTCAGGGCCAGAGGAGGCAGGGATGTGTGGCCCTAAGGACAAGGGAACCT  
>HPV72\_Alpha\_1491683\_nt5661\_Genome\_Tile\_rc|1  
AATCAAAGCCCTCAACATAAATAGAATGTGGATGCGTAGAGGGTACAAGAGGCATTGTAG  
>HPV72\_Alpha\_1491683\_nt6181\_Genome\_Tile\_rc|1  
TGTAGTCAACAGATACATTGTCCCGACTGTCAGAATTGTCAGCCACAAGTAAGGAAGTGT  
>HPV72\_Alpha\_1491683\_nt6221\_Genome\_Tile\_rc|1  
ATGGGAGGCTTGCACCCTATAATAAGCAATTGGGTCTGTTTGTAGTCAACAGATACATTG  
>HPV72\_Alpha\_1491683\_nt6241\_Genome\_Tile\_rc|1  
CCTTGGTCCAATGCTCACCAATGGGAGGCTTGCACCCTATAATAAGCAATTGGGTCTGTT  
>HPV72\_Alpha\_1491683\_nt6281\_Genome\_Tile\_rc|1  
CAGTCAGTTGGCTGAGAATTAGAGCCTGCACAAGGAGTGCCCTTGGTCCAATGCTCACCA  
>HPV72\_Alpha\_1491683\_nt6561\_Genome\_Tile\_rc|1  
TTTAAGATATAAACTGGCTGGTAGTGCCACCCATTGTGCCCTGCCTATTAAAAAATG  
>HPV72\_Alpha\_1491683\_nt6581\_Genome\_Tile\_rc|1  
CTGTCGCTACCCGAGGCACCTTTAAGATATAAACTGGCTGGTAGTGCCCTACCCATTGTG  
>HPV72\_Alpha\_1491683\_nt6601\_Genome\_Tile\_rc|1  
TATAACTACCAGGTGTCACCCGTGTCGCTACCCGAGGCACCTTTAAGATATAAACTGGCTG  
>HPV72\_Alpha\_1491683\_nt6821\_Genome\_Tile\_rc|1  
TACTCACGAAAATTAGAAGCTGTATATTCTGATACAGAGGACGCTGTGGCAGTACAAATA  
>HPV72\_Alpha\_1491683\_nt6841\_Genome\_Tile\_rc|1  
ATTCTCAGTGTGGCGAAGATACTCACGAAAATTAGAAGCTGTATATTCTGATACAGAGG  
>HPV72\_Alpha\_1491683\_nt7261\_Genome\_Tile\_rc|1  
ACAGTATGACATGTTACTTTTTTGCGCTTTTTTACGTTTAGTAGGGGCGGGGTCGAGGTAG  
>HPV72\_Alpha\_1491683\_nt7301\_Genome\_Tile\_rc|1  
ACATGCATGCATTGCACACATACACACATACACCACACAAACAGTATGACATGTTACTTT  
>HPV72\_Alpha\_1491683\_nt7321\_Genome\_Tile\_rc|1  
ACAAACAACAACAGAAACACACATGCATGCATTGCACACATACACACATACACCACACAA  
>HPV72\_Alpha\_1491683\_nt7401\_Genome\_Tile\_rc|1  
ATTCCACATACATACACAACACGGGGGCAGGGGCCATACAAAAACATACAACAACATAA  
>HPV72\_Alpha\_1491683\_nt7521\_Genome\_Tile\_rc|1  
GTGACACAAAACAAAGTGTAGGAAGTAGGACAACGTGCAAACACACACTTACTCACAGGG  
>HPV72\_Alpha\_1491683\_nt7561\_Genome\_Tile\_rc|1  
GAGAAAATATAAAATGGAGTACAGTAAAGGCATACAAAGGTGACACAAAACAAAGTGTA  
>HPV72\_Alpha\_1491683\_nt7581\_Genome\_Tile\_rc|1  
ACGGTCGCGAATACAAAATGGAGAAAATATAAAATGGAGTACAGTAAAGGGCATACAAAG  
>HPV72\_Alpha\_1491683\_nt7681\_Genome\_Tile\_rc|1  
TGGATAAGGTTTGTTGAAACAGGATGTGGGAGGAAAGCACAATGCATAGTTTCTATGTAC  
>HPV72\_Alpha\_1491683\_nt7741\_Genome\_Tile\_rc|1  
CAGGAAACACATAACTATGGAATGTATGTGCCAGAAACCTGTCAGGCACACCCAGATG  
>HPV72\_Alpha\_1491683\_nt7761\_Genome\_Tile\_rc|1  
ATATCTATTGTAAAATGAGTCAGGAAACACATAACTATGGAATGTATGTGCCAGAAAC  
>HPV72\_Alpha\_1491683\_nt7861\_Genome\_Tile\_rc|1  
GCCCATAGTTGCAAGACACATACTTGGCTACAACACCTAGAAAGGTAGCCAAAACAGCAA  
>HPV72\_Alpha\_1491683\_nt7881\_Genome\_Tile\_rc|1  
AACACGTTTGTAAAGGGCTTGCCCATAGTTGCAAGACACATACTTGGCTACAACACCTAG  
>HPV97\_Alpha\_71726694\_nt0201\_Genome\_Tile\_rc|1  
CCATACACTGAATGTGAATAATATCGTAATTCTCTAATTTTAGAAAAAAGGTTAAACAT  
>HPV97\_Alpha\_71726694\_nt0221\_Genome\_Tile\_rc|1  
TAATTTTTTCTAATGTATCTCCATACACTGAATGTGAATAATATCGTAATTCTCTAATTT  
>HPV97\_Alpha\_71726694\_nt0341\_Genome\_Tile\_rc|1  
AATAACCAGATATGTGGTGGGAATCGTCGTTTGTCTTTAAGATGTTTATATTTGTCTGCTG  
>HPV97\_Alpha\_71726694\_nt0521\_Genome\_Tile\_rc|1  
AGGTGCTCATAACATTGAAGGTCAGCCGAATTTATTTTCAATTTTGGGGTTGCAAATGCAAT  
>HPV97\_Alpha\_71726694\_nt0541\_Genome\_Tile\_rc|1

ATTCTTCCTCTAAGTCACTTAGGTGCTCATAACATTGAAGGTCAGCCGAATTTATTTTCAT  
>HPV97\_Alpha\_71726694\_nt1261\_Genome\_Tile\_rc|1  
TACTACTCCCCTACTACATAAACTGCCGCCATGTTCTCTATTTATATTTGTGTTTACGG  
>HPV97\_Alpha\_71726694\_nt1281\_Genome\_Tile\_rc|1  
ATTACCATCCATACACCCACTACTACTCCCCTACTACATAAACTGCCGCCATGTTCTCT  
>HPV97\_Alpha\_71726694\_nt1321\_Genome\_Tile\_rc|1  
CTAATTGTGGATTTTTCATTTTCTATATTACTATTATCATGATTACCATCCATACACCCAC  
>HPV97\_Alpha\_71726694\_nt1361\_Genome\_Tile\_rc|1  
TTATTATTTGCCTTTAATAGGTCTTTTAAATTCCTGCAATTACTAATTGTGGATTTTTCATTT  
>HPV97\_Alpha\_71726694\_nt1381\_Genome\_Tile\_rc|1  
CAGCTAACATTGCAGCTTTTTTATTATTTGCCTTTAAATAGGTCTTTTAAATTCCTGCAATTA  
>HPV97\_Alpha\_71726694\_nt2461\_Genome\_Tile\_rc|1  
GATTAATATTTGAGGTTAATAATATAGGCGGACATTTTAACTGTAGTAATGGCTTGTGCT  
>HPV97\_Alpha\_71726694\_nt2481\_Genome\_Tile\_rc|1  
CCATCTGTTATCTATAGCTGGATTAATATTTGAGGTTAATAATATAGGCGGACATTTTAA  
>HPV97\_Alpha\_71726694\_nt3141\_Genome\_Tile\_rc|1  
ATTCCTTCTTTCATATAAATAGAGTCCCCAGTGACTTACACATGCTTCTGTTTATCCCAT  
>HPV97\_Alpha\_71726694\_nt3201\_Genome\_Tile\_rc|1  
CACTTATTACTGTTACCATATTTTTTACTTTCATGTTCAAATTGCACATAAAATGTTTTTC  
>HPV97\_Alpha\_71726694\_nt3581\_Genome\_Tile\_rc|1  
TAGAACTATAGTATTGATTATATTTTTTAAATCGATACCGCAAACATTTTAACTGTTTT  
>HPV97\_Alpha\_71726694\_nt3621\_Genome\_Tile\_rc|1  
TTTTTATTACAGGAATCTGTCCAATGCCAGGTTGATGATATAGAACTATAGTATTGATTA  
>HPV97\_Alpha\_71726694\_nt3701\_Genome\_Tile\_rc|1  
CACTGTTAGGAATAGGAACACTATCCAAAAATTTGGTTCGTTGATGCTCACTATCATACA  
>HPV97\_Alpha\_71726694\_nt3781\_Genome\_Tile\_rc|1  
AAACACAAATGTTAACATTTGTTTACCACATTGTATACAATATACATATTACATTGTCAT  
>HPV97\_Alpha\_71726694\_nt3961\_Genome\_Tile\_rc|1  
TATGTGTAATAAAAACATAGGCAATAAAAAAACAATACATATGCTGTAAATGCAGTTAC  
>HPV97\_Alpha\_71726694\_nt3981\_Genome\_Tile\_rc|1  
TGTTATGTATATCTAGCATGTATGTGTAATAAAAACATAGGCAATAAAAAAACAATACA  
>HPV97\_Alpha\_71726694\_nt4001\_Genome\_Tile\_rc|1  
AATACAGTATATACAAGTAATGTTATGTATATCTAGCATGTATGTGTAATAAAAACATAG  
>HPV97\_Alpha\_71726694\_nt4021\_Genome\_Tile\_rc|1  
CAATACAAAAGATACTGTACAATACAGTATATACAAGTAATGTTATGTATATCTAGCATG  
>HPV97\_Alpha\_71726694\_nt4041\_Genome\_Tile\_rc|1  
ACAAGTATAAAAAAATATGCAATACAAAAGATACTGTACAATACAGTATATACAAGTAA  
>HPV97\_Alpha\_71726694\_nt4061\_Genome\_Tile\_rc|1  
ACAGTAAACAATAATACAAAACAAGTATAAAAAAATATGCAATACAAAAGATACTGTAC  
>HPV97\_Alpha\_71726694\_nt4081\_Genome\_Tile\_rc|1  
GGGATACCATATTTATTACAACAGTAAACAATAATACAAAACAAGTATAAAAAAATATG  
>HPV97\_Alpha\_71726694\_nt5141\_Genome\_Tile\_rc|1  
GATGTAGTAGGAATGTCAGCATAAACATCAAATAAGTTGCTGTCGCTGTTGCAGAAATT  
>HPV97\_Alpha\_71726694\_nt5161\_Genome\_Tile\_rc|1  
TAGCAGTAACACTAGTGTGATGTAGTAGGAATGTCAGCATAAACATCAAATAAGTTGC  
>HPV97\_Alpha\_71726694\_nt5181\_Genome\_Tile\_rc|1  
AGGGTATGTAAATGCTGTGTTAGCAGTAACACTAGTGTGATGTAGTAGGAATGTCAGC  
>HPV97\_Alpha\_71726694\_nt5201\_Genome\_Tile\_rc|1  
GATACAGTAGAATAGTATTTAGGGTATGTAAATGCTGTGTTAGCAGTAACACTAGTGTCA  
>HPV97\_Alpha\_71726694\_nt5221\_Genome\_Tile\_rc|1  
TACCATAAGAAGAGACTGACGATACAGTAGAATAGTATTTAGGGTATGTAAATGCTGTGT  
>HPV97\_Alpha\_71726694\_nt5241\_Genome\_Tile\_rc|1  
AGTTAAAGGAACAGTAAGGTTACCATAAGAAGAGACTGACGATACAGTAGAATAGTATTT  
>HPV97\_Alpha\_71726694\_nt5321\_Genome\_Tile\_rc|1  
GGTGTATATAAAGGCCATACAGAAGTACTAGAAGGTAATACAATATCTGGGCCTGTATAT

>HPV97\_Alpha\_71726694\_nt5341\_Genome\_Tile\_rc|1  
GTGTCGTGGACGTAGATGTAGGTGTTATAAAAAGGCCATACAGAAGTACTAGAAAGGTAATA  
>HPV97\_Alpha\_71726694\_nt5361\_Genome\_Tile\_rc|1  
ACCATTTATACCTATATAGTGTGTCGTGGACGTAGATGTAGGTGTTATAAAAAGGCCATAC  
>HPV97\_Alpha\_71726694\_nt5381\_Genome\_Tile\_rc|1  
GGCCATAAATAGTAATGCGTACCATTTATACCTATATAGTGTGTCGTGGACGTAGATGTA  
>HPV97\_Alpha\_71726694\_nt6961\_Genome\_Tile\_rc|1  
ATACTATTTTTTACGACGGACACGTAAACGCTTAGCAGGTTTGGAAGTAGTAGGGGCAGA  
>HPV97\_Alpha\_71726694\_nt7061\_Genome\_Tile\_rc|1  
ACATAACACATACAAGGATGTACAACAACATACAAATAACATACATACATGCTAAAATGC  
>HPV97\_Alpha\_71726694\_nt7121\_Genome\_Tile\_rc|1  
TTTGTTACTCACCAGGGTGCAACCATACAGGAACTACCAAACATATTTTATTTAATACC  
>HPV97\_Alpha\_71726694\_nt7141\_Genome\_Tile\_rc|1  
TACCACGAACACAAACACTATTTGTTACTCACCAGGGTGCAACCATACAGGAACTACCA  
>HPV97\_Alpha\_71726694\_nt7201\_Genome\_Tile\_rc|1  
ATATAAAATGGATGGTACTTTAAAATGTAAAATATAAAAGTAAATAAATTAATACTCA  
>HPV97\_Alpha\_71726694\_nt7221\_Genome\_Tile\_rc|1  
CATTAAAATGGAGAATTGTAATATAAAATGGATGGTACTTTAAAATGTAAAATATAAAAG  
>HPV97\_Alpha\_71726694\_nt7301\_Genome\_Tile\_rc|1  
TGCCAGAATCTACAAAGGTAATGTTTGCAACAGTGCCAGAATGTACAAAGGTAAGCCAAG  
>HPV97\_Alpha\_71726694\_nt7341\_Genome\_Tile\_rc|1  
GCCAGTACAGTAATGTATTTAAGATTAATGTTTGCAACAGTGCCAGAATCTACAAAGGTA  
>HPV97\_Alpha\_71726694\_nt7401\_Genome\_Tile\_rc|1  
TACGTGCCAGTGGTGAAAATATGTATGACTATTGTATGTGAGATTAACATTTGCAATAGT  
>HPV97\_Alpha\_71726694\_nt7421\_Genome\_Tile\_rc|1  
CGCCAAAGTGTGCGCCAAATACGTGCCAGTGGTGAAAATATGTATGACTATTGTATGTG  
>HPV97\_Alpha\_71726694\_nt7581\_Genome\_Tile\_rc|1  
TGGATGTAAAAGTAGTTGCACAGGCCAATAATACAAGTAGTACAAGTACAACTAACAAA  
>HPV97\_Alpha\_71726694\_nt7601\_Genome\_Tile\_rc|1  
AAGAAGAGTAGACAGATTGTTGGATGTAAAAGTAGTTGCACAGGCCAATAATACAAGTAG  
>HPV97\_Alpha\_71726694\_nt7721\_Genome\_Tile\_rc|1  
TACACCCATTTTTATATAACATTATTGTTAAAAGTATTAATGAAAAGTATGGGTTGTACT  
>HPVcand89\_Alpha\_22095322\_nt0041\_Genome\_Tile\_rc|1  
CCTTGGTGCAATATATGCATGTAAGCCGTAGATCCTCTAAATCCACGTCGCAGTCTTTGC  
>HPVcand89\_Alpha\_22095322\_nt0061\_Genome\_Tile\_rc|1  
CACTTCTGATGTTGTAAGCTCCTTGGTGCAATATATGCATGTAAGCCGTAGATCCTCTAA  
>HPVcand89\_Alpha\_22095322\_nt0121\_Genome\_Tile\_rc|1  
TACACCATGGGGCAGCTGCCACTTCCACACTATATCCAGTTCCTTTAGTGCAAAGGACAG  
>HPVcand89\_Alpha\_22095322\_nt0141\_Genome\_Tile\_rc|1  
CTACTTAAGCACGGTGCACATACACCATGGGGCAGCTGCCACTTCCACACTATATCCAGT  
>HPVcand89\_Alpha\_22095322\_nt0301\_Genome\_Tile\_rc|1  
GTATAAATACACCATATAGTCCTTTTCTGGCTGCCTAACGGCTTACAGCATATATAGCA  
>HPVcand89\_Alpha\_22095322\_nt0321\_Genome\_Tile\_rc|1  
GATATTTTATGAAATCGCTCGTTAAAATACACCATATAGTCCTTTTCTGGCTGCCTAAC  
>HPVcand89\_Alpha\_22095322\_nt0401\_Genome\_Tile\_rc|1  
TCCAGAACTATATCCTGGATGGTCGGCGTGCAGGCGTGCATATTACCCTGCAGTTGCAAC  
>HPVcand89\_Alpha\_22095322\_nt0421\_Genome\_Tile\_rc|1  
TAATTGGTTCTGGACGTTCTTCCAGAACTATATCCTGGATGGTCGGCGTGCAGGCGTGCA  
>HPVcand89\_Alpha\_22095322\_nt0441\_Genome\_Tile\_rc|1  
TTCTTCCTCACATTGTAGGCTAATTGGTTCTGGACGTTCTTCCAGAACTATATCCTGGAT  
>HPVcand89\_Alpha\_22095322\_nt0601\_Genome\_Tile\_rc|1  
GTCTTAGATGTGCGTCGTCAGACAATACTACTAACCTAACTGCACGATAGCACACACCAC  
>HPVcand89\_Alpha\_22095322\_nt0621\_Genome\_Tile\_rc|1  
CAGCAGCAGCTGTTGTAGATGTCTTAGATGTGCGTCGTCAGACAATACTACTAACCTAAC  
>HPVcand89\_Alpha\_22095322\_nt1001\_Genome\_Tile\_rc|1

GGGGACTTAATTCCTTATCTACCCATGACACGCCGGTACTGGATGCCGGGCTATAGGTAA  
>HPVcand89\_Alpha\_22095322\_nt1021\_Genome\_Tile\_rc|1  
TAGGTTTATGGCATCCAACCGGGGACTTAATTCCTTATCTACCCATGACACGCCGGTACT  
>HPVcand89\_Alpha\_22095322\_nt1041\_Genome\_Tile\_rc|1  
GCTTTTTCTGTGCCCCCTGTTTAGGTTTATGGCATCCAACCGGGGACTTAATTCCTTATCT  
>HPVcand89\_Alpha\_22095322\_nt1281\_Genome\_Tile\_rc|1  
GCCCTTATGTTGCTCGCCTTAAGCAGCTCCAGCACACCTTGCGTTCCTCCTGCGTCTGT  
>HPVcand89\_Alpha\_22095322\_nt1321\_Genome\_Tile\_rc|1  
GGATAGTCCAAATAGTTCCTTAAACTTACTCAGTATGGTGGCCCTTATGTTGCTCGCCTT  
>HPVcand89\_Alpha\_22095322\_nt1361\_Genome\_Tile\_rc|1  
TAGACTTATCACTTTTAAATTGCCTTACAAGGTCATAGTAGGATAGTCCAAATAGTTCCT  
>HPVcand89\_Alpha\_22095322\_nt1761\_Genome\_Tile\_rc|1  
TAGGCCCATTTGACTAATGTTGATAGACTAAACTGGGTTTCCTTCATTGCCCTCCCCTATT  
>HPVcand89\_Alpha\_22095322\_nt2381\_Genome\_Tile\_rc|1  
CTAAGGGGTCCACATTGGTGGTTATCATTAAGGGTGGACATTTTAGTTGTGTTAGGTTTC  
>HPVcand89\_Alpha\_22095322\_nt2401\_Genome\_Tile\_rc|1  
ATATTTTAAATGTATCATCTGCTAAGGGGTCCACATTGGTGGTTATCATTAAGGGTGGACA  
>HPVcand89\_Alpha\_22095322\_nt2481\_Genome\_Tile\_rc|1  
TTTAATGTATATACTGGCTCCCCGTTTTCGTTTCATTGGACATTTGTTTAGAAATCTAAAC  
>HPVcand89\_Alpha\_22095322\_nt2841\_Genome\_Tile\_rc|1  
AGGGTTCATCTTTATATGCACTGGCATTAAACTTTGCAATGACAAATGTATGGTAATGG  
>HPVcand89\_Alpha\_22095322\_nt2961\_Genome\_Tile\_rc|1  
CATATTCCATGGCCTTTTGGTCCTCTCCATCGTATTTAACAGTTACTGTATGTCCTTTTT  
>HPVcand89\_Alpha\_22095322\_nt2981\_Genome\_Tile\_rc|1  
GTATATTTTACCCCCAAGAAACATATTCCATGGCCTTTTGGTCCTCTCCATCGTATTTAAC  
>HPVcand89\_Alpha\_22095322\_nt3001\_Genome\_Tile\_rc|1  
TCTGTTTCTGGACATTGTATGTATATTTACCCCCAAGAAACATATTCCATGGCCTTTTGG  
>HPVcand89\_Alpha\_22095322\_nt3021\_Genome\_Tile\_rc|1  
CGGCCACCTTGTACCACATGTCTGTTTCTGGACATTGTATGTATATTTACCCCCAAGAAA  
>HPVcand89\_Alpha\_22095322\_nt3261\_Genome\_Tile\_rc|1  
CGGTGCAGGAAGTGGGTGTGGTGGGGTGGTGTAGCCGGTCACCAACTGCAGCAGAGGGTA  
>HPVcand89\_Alpha\_22095322\_nt3421\_Genome\_Tile\_rc|1  
CGTTCTGTGCCGTCAGGGTTACTGTGGAGCCCCCTGTGGCTACTGTCCACGTGCTTTTGT  
>HPVcand89\_Alpha\_22095322\_nt3441\_Genome\_Tile\_rc|1  
AACAATGCGCGATCCCAGATCGTTCTGTGCCGTGAGGGTTACTGTGGAGCCCCCTGTGGC  
>HPVcand89\_Alpha\_22095322\_nt3541\_Genome\_Tile\_rc|1  
GCACGTAGGTATAGGTCAGGTACTGTTTCTTAAATCTATATCTAAAACATTTTAGTTTG  
>HPVcand89\_Alpha\_22095322\_nt3681\_Genome\_Tile\_rc|1  
GACCTTGCATAGCCTGTATACCCTTTGGTATATGCACACGTGCAAGAAATTGTGCCCCGT  
>HPVcand89\_Alpha\_22095322\_nt3761\_Genome\_Tile\_rc|1  
CAAACATTATTTACATTGTATATACACAATACACTGTACCAAATATTACATGTAAGGTGG  
>HPVcand89\_Alpha\_22095322\_nt3781\_Genome\_Tile\_rc|1  
GTAGGCTCAGCTATGCAGTACAAACATTATTTACATTGTATATACACAATACACTGTACC  
>HPVcand89\_Alpha\_22095322\_nt3801\_Genome\_Tile\_rc|1  
ATATGTGGCACAGGACTATGGTAGGCTCAGCTATGCAGTACAAACATTATTTACATTGTA  
>HPVcand89\_Alpha\_22095322\_nt3821\_Genome\_Tile\_rc|1  
TTACTATTGCAATGTACAATATATGTGGCACAGGACTATGGTAGGCTCAGCTATGCAGTA  
>HPVcand89\_Alpha\_22095322\_nt3841\_Genome\_Tile\_rc|1  
ACGTAGTATAATATCCAGGGTTACTATTGCAATGTACAATATATGTGGCACAGGACTATG  
>HPVcand89\_Alpha\_22095322\_nt3861\_Genome\_Tile\_rc|1  
TCACTCCACAAACATATAAGACGTAGTATAATATCCAGGGTTACTATTGCAATGTACAAT  
>HPVcand89\_Alpha\_22095322\_nt3881\_Genome\_Tile\_rc|1  
AAATAAGCAGCACAAAGTATATCACTCCACAAACATATAAGACGTAGTATAATATCCAGGG  
>HPVcand89\_Alpha\_22095322\_nt3981\_Genome\_Tile\_rc|1  
TACCACAATACTTGCACATAAAGAAGTAGTAACCCTACATACACAATACCCAACAACACA

>HPVcand89\_Alpha\_22095322\_nt4001\_Genome\_Tile\_rc|1  
TGTGTGGTTATAGTCCTATATACCACAATACTTGCACATAAAGAAGTAGTAACCCTACAT  
>HPVcand89\_Alpha\_22095322\_nt4101\_Genome\_Tile\_rc|1  
TACCACCATGTCGTACCCCCCCCCCGACCGGTACCTCTACGGGGAACATGTGTATAAA  
>HPVcand89\_Alpha\_22095322\_nt4121\_Genome\_Tile\_rc|1  
CCAACATCATGTCTGTCAAATACCACCATGTCTGTACCCCCCCCCCGACCGGTACCTCT  
>HPVcand89\_Alpha\_22095322\_nt4141\_Genome\_Tile\_rc|1  
ACAACAATATGCCTAGTAACCCAACATCATGTCTGTCAAATACCACCATGTCTGTACCCCC  
>HPVcand89\_Alpha\_22095322\_nt4241\_Genome\_Tile\_rc|1  
CAGTGTAACAAATACAGGTATGGGAATGCACTATAAAAGCATGTTCAATAATGTAGTAGC  
>HPVcand89\_Alpha\_22095322\_nt4261\_Genome\_Tile\_rc|1  
TATAAAACACAATCCTATAGCAGTGTACCAAATACAGGTATGGGAATGCACTATAAAAGC  
>HPVcand89\_Alpha\_22095322\_nt4281\_Genome\_Tile\_rc|1  
ATTTATTGTATATATAAAAATATAAAACACAATCCTATAGCAGTGTACCAAATACAGGTA  
>HPVcand89\_Alpha\_22095322\_nt4681\_Genome\_Tile\_rc|1  
ATCTCAAAGCCATCGGTGCCTGTAAAATTGGGCAAGACAGCCCCTGACTCAACAATGCTA  
>HPVcand89\_Alpha\_22095322\_nt4821\_Genome\_Tile\_rc|1  
AAACACTGCCATGCTGCGGGGGCTCAATAATGGAGGGCTCGGTAAATGCAGGATTGCTAT  
>HPVcand89\_Alpha\_22095322\_nt4941\_Genome\_Tile\_rc|1  
GTACTGGGGTACTGCTTATAGGACCAGCGTCCACGTCCCCAGAGGTGGCAAATGTGCTCA  
>HPVcand89\_Alpha\_22095322\_nt5321\_Genome\_Tile\_rc|1  
AGGTAATAATGGCTGCATCTCAATGGATTCTGCAGCCGAAATGGGACTTACATCATGGTA  
>HPVcand89\_Alpha\_22095322\_nt5341\_Genome\_Tile\_rc|1  
GGCTGTGTAAGGTCAGGGGAAGGTAATAATGGCTGCATCTCAATGGATTCTGCAGCCGAA  
>HPVcand89\_Alpha\_22095322\_nt5361\_Genome\_Tile\_rc|1  
CAGCATATATATCATACACAGGCTGTGTAAGGTCAGGGGAAGGTAATAATGGCTGCATCT  
>HPVcand89\_Alpha\_22095322\_nt5521\_Genome\_Tile\_rc|1  
GCAGGAACGTCAAACCCCTGAGACAAAGGAACAGTAACATTTGTGTATTGAGACGATACA  
>HPVcand89\_Alpha\_22095322\_nt5541\_Genome\_Tile\_rc|1  
CTATGTCAGGCCCTGTAACAGCAGGAACGTCAAACCCCTGAGACAAAGGAACAGTAACAT  
>HPVcand89\_Alpha\_22095322\_nt5561\_Genome\_Tile\_rc|1  
ACTAGGGGCAGTGGGAAATGCTATGTCAGGCCCTGTAACAGCAGGAACGTCAAACCCCTG  
>HPVcand89\_Alpha\_22095322\_nt5581\_Genome\_Tile\_rc|1  
GAGGGGAATATGGGGGGGACACTAGGGGCAGTGGGAAATGCTATGTCAGGCCCTGTAACA  
>HPVcand89\_Alpha\_22095322\_nt5641\_Genome\_Tile\_rc|1  
GTACTAAATAAAAATCCGTACCGTGAATATATATAGCCTGTGGAGGGGCCAAGGGTATAT  
>HPVcand89\_Alpha\_22095322\_nt5881\_Genome\_Tile\_rc|1  
GTTGGCCTTTTTGTTAGCACCATTGACCTGTACAGTATAATAAGGGTGGCCAACTGTAAT  
>HPVcand89\_Alpha\_22095322\_nt6121\_Genome\_Tile\_rc|1  
GTCAACATCTGCAGCAACCAATAAGGAAGCATTTTCAGTGTATCCAAACGGTTGTATAA  
>HPVcand89\_Alpha\_22095322\_nt6141\_Genome\_Tile\_rc|1  
ACAGATATATTATCCCTACTGTCAACATCTGCAGCAACCAATAAGGAAGCATTTTCAGTG  
>HPVcand89\_Alpha\_22095322\_nt6281\_Genome\_Tile\_rc|1  
CAATAGTAGTATTTAGCAACTGCAAAGGTGGGCAATCCCCCTGCTGAGGCACAACACTAG  
>HPVcand89\_Alpha\_22095322\_nt6541\_Genome\_Tile\_rc|1  
AGCAGCAGACCCAGGCATATACAAGGTTTTTGGCAGGTCCTCACCCATAACACCCTGCCT  
>HPVcand89\_Alpha\_22095322\_nt6581\_Genome\_Tile\_rc|1  
TTGGGGCATATACATAGCTAGTAAGTGTATTTCTGTTATTAGCAGCAGACCCAGGCATAT  
>HPVcand89\_Alpha\_22095322\_nt6601\_Genome\_Tile\_rc|1  
AACCATAGACCCACTGGGCGTTGGGGCATATACATAGCTAGTAAGTGTATTTCTGTTATT  
>HPVcand89\_Alpha\_22095322\_nt6781\_Genome\_Tile\_rc|1  
CTTAAAGCGTGTAGAAGTGTATTCTGTGCCAGACTGGGAAGCAGCACAAATGGTAAGGTT  
>HPVcand89\_Alpha\_22095322\_nt6801\_Genome\_Tile\_rc|1  
TCAGTGTGTCTTAAATATTCCTTAAAGCGTGTAGAAGTGTATTCTGTGCCAGACTGGGAA  
>HPVcand89\_Alpha\_22095322\_nt6861\_Genome\_Tile\_rc|1

ATTATCTCAGGCGTTAGGTGTATCTTACATAGTTGGAATATAAACTGTAGGTCATATTCC  
>HPVcand89\_Alpha\_22095322\_nt6881\_Genome\_Tile\_rc|1  
TCATATTGTGTAAATAGGACATTATCTCAGGCGTTAGGTGTATCTTACATAGTTGGAATA  
>HPVcand89\_Alpha\_22095322\_nt7261\_Genome\_Tile\_rc|1  
ACCACATAACATAATATACAAAACCAAATACAGCACACACAACACACAGAGTATAAATTA  
>HPVcand89\_Alpha\_22095322\_nt7321\_Genome\_Tile\_rc|1  
ACACTACACAACAGTAGGGATACATACATAAGTTATACAATACATACACACACAGAGGGC  
>HPVcand89\_Alpha\_22095322\_nt7401\_Genome\_Tile\_rc|1  
AATAGGGGTTACATACAGGACACACAGTACATAGGGGTTACATACAGGACACACACTACA  
>HPVcand89\_Alpha\_22095322\_nt7521\_Genome\_Tile\_rc|1  
GGAAATGGCCGAATACATATCTCATAGGGCGCAGCTGGACACAGGGCCACAGTGACACAT  
>HPVcand89\_Alpha\_22095322\_nt7541\_Genome\_Tile\_rc|1  
AATGGACGCTGGGTGGGAAAGGAAATGGCCGAATACATATCTCATAGGGCGCAGCTGGAC  
>HPVcand89\_Alpha\_22095322\_nt7621\_Genome\_Tile\_rc|1  
TTACAAGTCTTTGTGTAAAGTGGCATGGCGCCATAACAAAAACAAAAACGCGGGAGACCG  
>HPVcand89\_Alpha\_22095322\_nt7641\_Genome\_Tile\_rc|1  
TACGCAGGAAGTATAAAAGATTACAAGTCTTTGTGTAAAGTGGCATGGCGCCATAACAAA  
>HPVcand89\_Alpha\_22095322\_nt7721\_Genome\_Tile\_rc|1  
GTACATAAATTGTGCACAGCACAAATGTATTTGTAGCCAAATAAATGTCAGGCACTCCCAG  
>HPVcand89\_Alpha\_22095322\_nt7741\_Genome\_Tile\_rc|1  
TTGCAAAATGAGTAATGAAAGTACATAAATTGTGCACAGCACAAATGTATTTGTAGCCAAA  
>HPVcand89\_Alpha\_22095322\_nt7881\_Genome\_Tile\_rc|1  
TGGGTATGGCATGAAACATGTTTAAAAGCAATAAAACAAGGGTTACAAGACACATAGTTG  
>HPVcand89\_Alpha\_22095322\_nt7921\_Genome\_Tile\_rc|1  
TAATAATAAGTAAAGAATGACACATAGGGAGCGACCGGTATGGGTATGGCATGAAACATG  
>HPVcand89\_Alpha\_22095322\_nt7941\_Genome\_Tile\_rc|1  
AGTCTTATGATTGTAATATATAATAATAAGTAAAGAATGACACATAGGGAGCGACCGGTA  
>HPV13\_Alpha\_85827580\_nt0241\_Genome\_Tile\_rc|1  
CATGCACAAGCCGCAAATGGAAACGATCCTCGCCACACTATATATAAACTCTTATACTGA  
>HPV13\_Alpha\_85827580\_nt0281\_Genome\_Tile\_rc|1  
ATGCCTAAACTGGTTAATCTTTCTTGTATTTCTAAGCAGCATGCACAAGCCGCAAATGG  
>HPV13\_Alpha\_85827580\_nt0441\_Genome\_Tile\_rc|1  
AACTGCTGTTTAATTTAATAAATCGTGCCTTCTGCAAAATATGTCTTAGTTTCTCCACTT  
>HPV13\_Alpha\_85827580\_nt0661\_Genome\_Tile\_rc|1  
GCTACAACATTTACTACAGGACGTTAGTATTTGGTAGCATTGTAATAGTGTGCTATGTTG  
>HPV13\_Alpha\_85827580\_nt0741\_Genome\_Tile\_rc|1  
ACTATATTACAGCGTGCCAGCAGTAGGTCTGTAGGTCGTGAATGTCAGGTCCTGTACAC  
>HPV13\_Alpha\_85827580\_nt2081\_Genome\_Tile\_rc|1  
TTTCTGCTTCCCTCTATTTTTTTTACTTCTATATGTTATCCATTGTTTCATAGACATTTTT  
>HPV13\_Alpha\_85827580\_nt2521\_Genome\_Tile\_rc|1  
TTGTTACTCTACTATACAAATATTTATATTTGTCATCTTTGGTAATGTCTACATTAGATG  
>HPV13\_Alpha\_85827580\_nt3101\_Genome\_Tile\_rc|1  
TCCATTTATCTGTGTCAAACACATATATGTATGTCCACGACACATAATCCATTCTATTGT  
>HPV13\_Alpha\_85827580\_nt3161\_Genome\_Tile\_rc|1  
TTTTCAAATTTCCATGTATGTAGTACAACCCTTTATAATCTACCATTCCTTTCACCTTTG  
>HPV13\_Alpha\_85827580\_nt3181\_Genome\_Tile\_rc|1  
TTCAAACCTCTATATAATATGTTTTCAAATTTCCATGTATGTAGTACAACCCTTTATAATC  
>HPV13\_Alpha\_85827580\_nt3721\_Genome\_Tile\_rc|1  
TCTTTGTTGTTCAATTACATAGGTTAAGGTTACCAGTGCATGTTTTTGTGAATTATTAGG  
>HPV13\_Alpha\_85827580\_nt3761\_Genome\_Tile\_rc|1  
TTATGGTTGCAGGTATTTTTTACAGTGTTTAAAAAGTCTTGTCTTTGTTGTTCAATTTACAT  
>HPV13\_Alpha\_85827580\_nt3781\_Genome\_Tile\_rc|1  
CATAAAACCTAGTTTATGTGTTATGGTTGCAGGTATTTTTTACAGTGTTTAAAAAGTCTTG  
>HPV13\_Alpha\_85827580\_nt3801\_Genome\_Tile\_rc|1  
TGTTACAACAATTGCAATGACATAAAACCTAGTTTATGTGTTATGGTTGCAGGTATTTTTT



>HPV13\_Alpha\_85827580\_nt3821\_Genome\_Tile\_rc|1  
TATTTACATACAATATATGCTGTTACAACAATTGCAATGACATAAAACCTAGTTTATGTG  
>HPV13\_Alpha\_85827580\_nt3861\_Genome\_Tile\_rc|1  
GTATAAATTCCATGTACAATATATACACACACAACAATATTTACATACAATATATGC  
>HPV13\_Alpha\_85827580\_nt3921\_Genome\_Tile\_rc|1  
TAAGTGCAATTACAAGTGGCAGTAATGACTTGCTGGTTTCCTGTGTAGTAACATCCACAG  
>HPV13\_Alpha\_85827580\_nt3961\_Genome\_Tile\_rc|1  
GATATCCACAATATTGTTATAATGCTAACTACACACACTGTAAGTGCAATTACAAGTGGC  
>HPV13\_Alpha\_85827580\_nt3981\_Genome\_Tile\_rc|1  
TTGTGTACACCAAAAACCTCTGATATCCACAATATTGTTATAATGCTAACTACACACACTG  
>HPV13\_Alpha\_85827580\_nt4001\_Genome\_Tile\_rc|1  
TAATGTTAGTACTAAAACGTTTGTGTACACCAAAAACCTCTGATATCCACAATATTGTTAT  
>HPV13\_Alpha\_85827580\_nt4021\_Genome\_Tile\_rc|1  
CACAAAAGTATATATAAAATTAATGTTAGTACTAAAACGTTTGTGTACACCAAAAACCTCT  
>HPV13\_Alpha\_85827580\_nt4121\_Genome\_Tile\_rc|1  
TTCTTGTGTTTGTAAATATATTGGTGTACACACAACGCAGGAAGAAAGCAAAGAGACAG  
>HPV13\_Alpha\_85827580\_nt4221\_Genome\_Tile\_rc|1  
ACAGTAACCCCTAGAATGGCTACAATAAATGATAAAATTAACCATAATAGCAACCATGTGT  
>HPV13\_Alpha\_85827580\_nt4241\_Genome\_Tile\_rc|1  
TCCAGTTCTTATATACAGCAACAGTAACCCCTAGAATGGCTACAATAAATGATAAAATTAA  
>HPV13\_Alpha\_85827580\_nt4281\_Genome\_Tile\_rc|1  
ATAAAACCACTTATTTACTCCAGCACTGGCAATGCATATGTCCAGTTCTTATATACAGCA  
>HPV13\_Alpha\_85827580\_nt4301\_Genome\_Tile\_rc|1  
TAAATGAATACACACAAAATATAAAACCACTTATTTACTCCAGCACTGGCAATGCATATG  
>HPV13\_Alpha\_85827580\_nt4561\_Genome\_Tile\_rc|1  
GGCCCAGATGATATGGCAGGGCGTGGGGTGGATCCTACTGGTACATAGCCAGTCCTACCG  
>HPV13\_Alpha\_85827580\_nt4861\_Genome\_Tile\_rc|1  
GTAGATGGCGATATAAACACGTGTGCACCACTTTCAATAGAAGGTTGAGATTGTGTAATA  
>HPV13\_Alpha\_85827580\_nt4881\_Genome\_Tile\_rc|1  
CTGTAGAATGAGGGGAAATAGTAGATGGCGATATAAACACGTGTGCACCACTTTCAATAG  
>HPV13\_Alpha\_85827580\_nt4901\_Genome\_Tile\_rc|1  
TGTATCTAAAGGAATGTCTTCTGTAGAATGAGGGGAAATAGTAGATGGCGATATAAACAC  
>HPV13\_Alpha\_85827580\_nt4921\_Genome\_Tile\_rc|1  
TCTGAGGAAGATACAATAAATGTATCTAAAGGAATGTCTTCTGTAGAATGAGGGGAAATA  
>HPV13\_Alpha\_85827580\_nt5121\_Genome\_Tile\_rc|1  
GTTTCATGAATGGTATTGTGGGCAAACCTGCAAACCTTATATCTTCACCTTCATATGTTGGGT  
>HPV13\_Alpha\_85827580\_nt5141\_Genome\_Tile\_rc|1  
CATAAATGCCTCATCAGGGGGTTTCATGAATGGTATTGTGGGCAAACCTGCAAACCTTATATC  
>HPV13\_Alpha\_85827580\_nt5221\_Genome\_Tile\_rc|1  
GACCCCTCTGACCAATTCGACTAAACCTAACAGACCACGCCGTGATGTTATGGCTGGC  
>HPV13\_Alpha\_85827580\_nt5281\_Genome\_Tile\_rc|1  
GAAATATCCTTAAAGAAATGGACCCTTCCACCTATATGCTTGCCGCTTCGAGTATACATA  
>HPV13\_Alpha\_85827580\_nt5581\_Genome\_Tile\_rc|1  
AAAATAGGCGTAACAGGATTATAAGGTGTTACTGTAGGTGCAGTTGGGAATGTTATGTCA  
>HPV13\_Alpha\_85827580\_nt5881\_Genome\_Tile\_rc|1  
ACTGATAACCAGATACCTTAGGGACAACAGTTTTGTTTTGTTTCTTAATAGGAAAATAAG  
>HPV13\_Alpha\_85827580\_nt5901\_Genome\_Tile\_rc|1  
TACAACTTTAAATACCCTAAACTGATAACCAGATACCTTAGGGACAACAGTTTTGTTTTG  
>HPV13\_Alpha\_85827580\_nt6501\_Genome\_Tile\_rc|1  
ATATAATTCTGCTGGGATTAGTTCACCAACAGAGCCTGCCCTGTAAAGAAATGCCTTGC  
>HPV13\_Alpha\_85827580\_nt6521\_Genome\_Tile\_rc|1  
AGTGTATTACTACCCTTAACATATAATTCTGCTGGGATTAGTTCACCAACAGAGCCTGCC  
>HPV13\_Alpha\_85827580\_nt6541\_Genome\_Tile\_rc|1  
TATAGTAAATACTATTAGAAAGTGATTACTACCCTTAACATATAATTCTGCTGGGATTA  
>HPV13\_Alpha\_85827580\_nt6561\_Genome\_Tile\_rc|1

AAGAGAGCCACTGGGAGTATTATAGTAAATACTATTAGAAAGTGTATTACTACCCTTAAC  
>HPV13\_Alpha\_85827580\_nt6741\_Genome\_Tile\_rc|1  
TGTGGCCTTATATGTGTCTGAAAGAGATGATGTAGTGGCTGCACACACAGTCATGTTAGT  
>HPV13\_Alpha\_85827580\_nt6761\_Genome\_Tile\_rc|1  
CGCATGTACTGTTTATATTCTGTGGCCTTATATGTGTCTGAAAGAGATGATGTAGTGGCT  
>HPV13\_Alpha\_85827580\_nt6941\_Genome\_Tile\_rc|1  
GCCTGAGATTGTACATATCTATATGTGTCTTCCAATGTTCCATTAGGAGGGGAGATAGC  
>HPV13\_Alpha\_85827580\_nt7001\_Genome\_Tile\_rc|1  
CTAAGACCCGCATACGGATCCTGTTTTTCTTTATCAGGTGTAGGCTTTTGACACGTTATG  
>HPV13\_Alpha\_85827580\_nt7141\_Genome\_Tile\_rc|1  
TAGATGTAGATGCAGCACGTTTTCTACCTACACGAATAGGTGACCTAGACTGAACGCCTG  
>HPV13\_Alpha\_85827580\_nt7161\_Genome\_Tile\_rc|1  
ACGTGTAGTAGGTGTGGCAGTAGATGTAGATGCAGCACGTTTTCTACCTACACGAATAGG  
>HPV13\_Alpha\_85827580\_nt7181\_Genome\_Tile\_rc|1  
TATTTCTTTTAGCTTTTTTACGTGTAGTAGGTGTGGCAGTAGATGTAGATGCAGCACGT  
>HPV13\_Alpha\_85827580\_nt7241\_Genome\_Tile\_rc|1  
ACACAACATATATACAGTACAAACAAACGTGACATACATACACAATCATAAAACAACTAT  
>HPV13\_Alpha\_85827580\_nt7281\_Genome\_Tile\_rc|1  
ATAAGTAACATGCACATACATAACATTACACATACAGTACACAACATATATACAGTAC  
>HPV13\_Alpha\_85827580\_nt7321\_Genome\_Tile\_rc|1  
ATTAAATTTATTGCATACAAACACACACACACATTCTTTAATAAGTAACATGCACATACA  
>HPV13\_Alpha\_85827580\_nt7401\_Genome\_Tile\_rc|1  
TACTGTTATAGTATAGTATACAAAACAACACACGAGACACAACATACCACTTACTCATAG  
>HPV13\_Alpha\_85827580\_nt7421\_Genome\_Tile\_rc|1  
AAGTTACAAAATGGTTGCACTACTGTTATAGTATAGTATACAAAACAACACACGAGACAC  
>HPV13\_Alpha\_85827580\_nt7541\_Genome\_Tile\_rc|1  
TGGATAATTTTGGCAGGCGGTAGGTAAGATTATATAAACAGCGTGCTGCAACAAATCGGT  
>HPV13\_Alpha\_85827580\_nt7601\_Genome\_Tile\_rc|1  
AGTAAACATATATAACCGCGCCCTAGCAACGCCAGGTGTGTGGGTGATTTTGGCAAGCGG  
>HPV13\_Alpha\_85827580\_nt7621\_Genome\_Tile\_rc|1  
TAGAAAGATTAGTAAGATTTAGTAAACATATATAACCGCGCCCTAGCAACGCCAGGTGTG  
>HPV13\_Alpha\_85827580\_nt7641\_Genome\_Tile\_rc|1  
TATAAAGGTAAAATGAGTGATAGAAAGATTAGTAAGATTTAGTAAACATATATAACCGCG  
>HPV13\_Alpha\_85827580\_nt7661\_Genome\_Tile\_rc|1  
TTGAAAAGCAAAAAGTATTGTTATAAAGGTAAAATGAGTGATAGAAAGATTAGTAAGATTT  
>HPV13\_Alpha\_85827580\_nt7681\_Genome\_Tile\_rc|1  
TAGTAAGTAGAAAAATGTACTTGAAAAGCAAAAGTATTGTTATAAAGGTAAAATGAGTGA  
>HPV13\_Alpha\_85827580\_nt7701\_Genome\_Tile\_rc|1  
AAAACCTTTTCAGGCATTGGCTAGTAAGTAGAAAAATGTACTTGAAAAGCAAAAGTATTGT  
>HPV13\_Alpha\_85827580\_nt7721\_Genome\_Tile\_rc|1  
AATGTAGTGCTGGTAGCCAAAAACCTTTTCAGGCATTGGCTAGTAAGTAGAAAAATGTAC  
>HPV102\_Alpha\_71726718\_nt2421\_Genome\_Tile\_rc|1  
ATAAACTTAAACACTGTTATTCTGCTACGTAAATATTTTAGTGACTCGTCTGCCAACGGA  
>HPV102\_Alpha\_71726718\_nt2441\_Genome\_Tile\_rc|1  
CTGTTACTGGACATTTATTCTATAAACTTAAACACTGTTATTCTGCTACGTAAATATTTTA  
>HPV102\_Alpha\_71726718\_nt3021\_Genome\_Tile\_rc|1  
CATAATCTATGCGGCCTGGCACTTTATACCATGTGTCTGTGTCTCCTTATTACATATA  
>HPV102\_Alpha\_71726718\_nt3401\_Genome\_Tile\_rc|1  
AGTGTACCCGTAGAATCCGTGGGTACTAGTGTCCAGCCGCTTTTGATGTTGTTTTTCGGT  
>HPV102\_Alpha\_71726718\_nt3441\_Genome\_Tile\_rc|1  
TGTTACTGTCACTGTTGTCCCTTGGGCGTTTTGGGCACTCAGTGTACCCGTAGAATCCGT  
>HPV102\_Alpha\_71726718\_nt3461\_Genome\_Tile\_rc|1  
TAAGTGGATTACAGGTGTATTGTTACTGTCACTGTTGTCCCTTGGGCGTTTTGGGCACTC  
>HPV102\_Alpha\_71726718\_nt3621\_Genome\_Tile\_rc|1  
TACGTTGTTCTACACTGCTATACCGCAAGGTAACAAAGGTTGCTTTAGTGGCTGTCTCCC

>HPV102\_Alpha\_71726718\_nt3641\_Genome\_Tile\_rc|1  
TACCCTACTTAAAAACAGGTTACGTTGTTCTACACTGCTATACCGCAAGGTAACAAAGGT  
>HPV102\_Alpha\_71726718\_nt3781\_Genome\_Tile\_rc|1  
CAGTGCTACTGCAAACACAATTTGTATACACCTATACAATGTAAGTATTACAGCATATATA  
>HPV102\_Alpha\_71726718\_nt3801\_Genome\_Tile\_rc|1  
TGGATTGGTAATATGTGGCTCAGTGCTACTGCAAACACAATTTGTATACACCTATACAATG  
>HPV102\_Alpha\_71726718\_nt3821\_Genome\_Tile\_rc|1  
CACTTTACCAGGTGTGGGGGTGGATTGGTAATATGTGGCTCAGTGCTACTGCAAACACAAT  
>HPV102\_Alpha\_71726718\_nt3841\_Genome\_Tile\_rc|1  
CAGGGTTGTAACCTGTGTGCACACTTTACCAGGTGTGGGGGTGGATTGGTAATATGTGGCT  
>HPV102\_Alpha\_71726718\_nt3881\_Genome\_Tile\_rc|1  
GTATGTCACACCACCAACATATAAAGCATAAAACAAGATCCAGGGTTGTAACCTGTGTGCA  
>HPV102\_Alpha\_71726718\_nt3901\_Genome\_Tile\_rc|1  
AAAGCAAACAAGAAGCACAAAGTATGTCACACCACCAACATATAAAGCATAAAACAAGATC  
>HPV102\_Alpha\_71726718\_nt3961\_Genome\_Tile\_rc|1  
TAGGTATATAATGCACATAAACACAACAAAGGCAGCACAGGGAGAAAGGTACGAAAGCCA  
>HPV102\_Alpha\_71726718\_nt3981\_Genome\_Tile\_rc|1  
AGGTACACTAAAAACAACCCTAGGTATATAATGCACATAAACACAACAAAGGCAGCACAG  
>HPV102\_Alpha\_71726718\_nt4001\_Genome\_Tile\_rc|1  
CACTGGACCACAGTACCTGAAGGTACACTAAAAACAACCCTAGGTATATAATGCACATAA  
>HPV102\_Alpha\_71726718\_nt4141\_Genome\_Tile\_rc|1  
GCTTGCCCCAAAAACAATCACATCATAGGACGCCCCCCCCGTCGTGTTTCCAATGGATAC  
>HPV102\_Alpha\_71726718\_nt4181\_Genome\_Tile\_rc|1  
GATGATCAAAAATTAAAATTATTAACAGTAATCCAGTATCAGCTTGCCCCAAAAACAATCAC  
>HPV102\_Alpha\_71726718\_nt4221\_Genome\_Tile\_rc|1  
ACATGTGCATAAGCCTCATATACAGCAGGATAATAATTATGATGATCAAAAATTAAAATTA  
>HPV102\_Alpha\_71726718\_nt4241\_Genome\_Tile\_rc|1  
AGGAACACAGTAAGGAGTCTACATGTGCATAAGCCTCATATACAGCAGGATAATAATTAT  
>HPV102\_Alpha\_71726718\_nt4261\_Genome\_Tile\_rc|1  
AAAATGTATGGGAATACAAAAGGAACACAGTAAGGAGTCTACATGTGCATAAGCCTCATA  
>HPV102\_Alpha\_71726718\_nt4321\_Genome\_Tile\_rc|1  
TTGTGTAATTAAATGTATTTATTAAGTGCTGTGTATAAAACAATACAAAAAGTAATATCA  
>HPV102\_Alpha\_71726718\_nt4341\_Genome\_Tile\_rc|1  
TCGCCTAACCACAGTGGACATTGTGTAATTAAATGTATTTATTAAGTGCTGTGTATAAAA  
>HPV102\_Alpha\_71726718\_nt4361\_Genome\_Tile\_rc|1  
GTTGCGGACGCTCGTTTTCGTCGCCTAACACAGTGGACATTGTGTAATTAAATGTATTT  
>HPV102\_Alpha\_71726718\_nt4841\_Genome\_Tile\_rc|1  
CCATGTTGTGGAGCCTCAATTATAGAAGGTTCTGTAAACAAGGGATTAGTAAAGCTAGTG  
>HPV102\_Alpha\_71726718\_nt5041\_Genome\_Tile\_rc|1  
CAGATACTTTAACTTGGTCTGTGCGCAGCTGTAAAGGCAATGCGAGGGCCTGCAACAC  
>HPV102\_Alpha\_71726718\_nt5341\_Genome\_Tile\_rc|1  
AGGGGCGAAGTTCAATATGCTCTGCACCTGCAATAGGACTAATATCATGGTAAAAATGCA  
>HPV102\_Alpha\_71726718\_nt5361\_Genome\_Tile\_rc|1  
AGTAGCAATGGAAGGCTGCAAGGGGCGAAGTTCAATATGCTCTGCACCTGCAATAGGACT  
>HPV102\_Alpha\_71726718\_nt5381\_Genome\_Tile\_rc|1  
TATAAGGAGTCCCCTGGGGCAGTAGCAATGGAAGGCTGCAAGGGGCGAAGTTCAATATGC  
>HPV102\_Alpha\_71726718\_nt5441\_Genome\_Tile\_rc|1  
GTATATGAAACATGTGGAGACGCCAAGGAGTCCAAGTGGCCATTATCAGCATAAATATCA  
>HPV102\_Alpha\_71726718\_nt5461\_Genome\_Tile\_rc|1  
AAGGAACAGACGTGGAAGAAGTATATGAAACATGTGGAGACGCCAAGGAGTCCAAGTGGC  
>HPV102\_Alpha\_71726718\_nt5501\_Genome\_Tile\_rc|1  
GCAGAGACCACAGATGTAGCTGAAATATTTGTAGATTGCAAAGGAACAGACGTGGAAGAA  
>HPV102\_Alpha\_71726718\_nt5561\_Genome\_Tile\_rc|1  
CCTGTATATGCAGGCAATCAAACCCAGAAGAGAGTGGTACTGTGACATTGTCATACCGC  
>HPV102\_Alpha\_71726718\_nt5581\_Genome\_Tile\_rc|1

TGGCAATTGGAATGTCAGGGCCTGTATATGCAGGCAAATCAAACCCAGAAGAGAGTGGTA  
>HPV102\_Alpha\_71726718\_nt5621\_Genome\_Tile\_rc|1  
TTAGAGGACTGGGAAACATGCAGCACACTGGTAGTAGGAGTGGCAATTGGAATGTCAGGG  
>HPV102\_Alpha\_71726718\_nt5641\_Genome\_Tile\_rc|1  
ACACAGATTGGGAAGGAACATTAGAGGACTGGGAAACATGCAGCACACTGGTAGTAGGAG  
>HPV102\_Alpha\_71726718\_nt5661\_Genome\_Tile\_rc|1  
ATAGTCTGTACCATCCACAAACACAGATTGGGAAGGAACATTAGAGGACTGGGAAACATG  
>HPV102\_Alpha\_71726718\_nt5681\_Genome\_Tile\_rc|1  
AAGTAATTAGGCAATAAAAAATAGTCTGTACCATCCACAAACACAGATTGGGAAGGAACA  
>HPV102\_Alpha\_71726718\_nt6181\_Genome\_Tile\_rc|1  
TTTGTAATCTACAGAAACATTGTCCCGTCTATCGGCGTCTGCTGCAGCAAGTAATGGGGT  
>HPV102\_Alpha\_71726718\_nt6221\_Genome\_Tile\_rc|1  
CAATAGGGGGTTTACACCCAATAATAAGTAGTTGGGTTTGTGTTGTAATCTACAGAAACAT  
>HPV102\_Alpha\_71726718\_nt6581\_Genome\_Tile\_rc|1  
GTCTATTATTTCCAGAGGTGCCAGGTATGTAATAGGAGGCAGGGAGTTCCTCGCCCATGG  
>HPV102\_Alpha\_71726718\_nt6601\_Genome\_Tile\_rc|1  
TACATAACTGGTAGGAGTTTGTCTATTATTTCCAGAGGTGCCAGGTATGTAATAGGAGGC  
>HPV102\_Alpha\_71726718\_nt7301\_Genome\_Tile\_rc|1  
CACATAGGCAACATATGTATACACACACATACACAACACACACGTACAACACATAAGTAT  
>HPV102\_Alpha\_71726718\_nt7341\_Genome\_Tile\_rc|1  
ACACAAACATGTAACAAACAAACATGCATACATACACGAACACATAGGCAACATATGTAT  
>HPV102\_Alpha\_71726718\_nt7361\_Genome\_Tile\_rc|1  
CAAATACATACATAGAACACACAAACATGTAACAAACAAACATGCATACATACACGAA  
>HPV102\_Alpha\_71726718\_nt7501\_Genome\_Tile\_rc|1  
CACAAAAGGAACTGGTACATAAGGGGTCAGGAACTGTAAGGCGGTGCAGGACGTGTGGAG  
>HPV102\_Alpha\_71726718\_nt7641\_Genome\_Tile\_rc|1  
ATGCAGGATATGCGTAAGACAGGATTACTTACTATTGTGTGTTGTGGCAGCATGCCACTG  
>HPV102\_Alpha\_71726718\_nt7661\_Genome\_Tile\_rc|1  
GTGGAACATTGGCACAATGTATGCAGGATATGCGTAAGACAGGATTACTTACTATTGTGT  
>HPV102\_Alpha\_71726718\_nt7741\_Genome\_Tile\_rc|1  
GCAGGATGAGTATGAGTAAAACATAAATATTGTCTGGCAACCACGTTGTGCAGCCAACAA  
>HPV106\_Alpha\_71726710\_nt0001\_Genome\_Tile\_rc|1  
GTCTCCGTTGGTCATGGCTATTTTGTGCTGAAGCAACATATCTCTTTTATATGTACCCAT  
>HPV106\_Alpha\_71726710\_nt0021\_Genome\_Tile\_rc|1  
AAGATATTCTTTGGACAGCAGTCTCCGTTGGTCATGGCTATTTTGTGCTGAAGCAACATA  
>HPV106\_Alpha\_71726710\_nt0041\_Genome\_Tile\_rc|1  
GATAGGCTTTGCACAATAGGAAGATATTCTTTGGACAGCAGTCTCCGTTGGTCATGGCTA  
>HPV106\_Alpha\_71726710\_nt2341\_Genome\_Tile\_rc|1  
TTTCTGTCTATGCATACCTGGTTTCCGTCCAGCGGTTTCGTAGGTATGTATCTATGTAA  
>HPV106\_Alpha\_71726710\_nt3561\_Genome\_Tile\_rc|1  
AAATAATACAGGTGTATGCTTTTTTAGTCTATATCTTAAACACTTTAACTTATTTGGATC  
>HPV106\_Alpha\_71726710\_nt3681\_Genome\_Tile\_rc|1  
CACCGTAGCTAAGAACTTTGCTCTTTGCTCTACACTATCATGCCACAATGTTACAAAGGC  
>HPV106\_Alpha\_71726710\_nt3701\_Genome\_Tile\_rc|1  
ACAATGTCTTAGGCAGAGTCACCGTAGCTAAGAACTTTGCTCTTTGCTCTACACTATCA  
>HPV106\_Alpha\_71726710\_nt3721\_Genome\_Tile\_rc|1  
TCATGTACCCAGGTACAGCCACAATGTCCTTAGGCAGAGTCACCGTAGCTAAGAACTTTG  
>HPV106\_Alpha\_71726710\_nt3761\_Genome\_Tile\_rc|1  
AAGTATACAATATACAGGCCACTATTATGCAAACATAGTCATGTACCCAGGTACAGCC  
>HPV106\_Alpha\_71726710\_nt3801\_Genome\_Tile\_rc|1  
CCTTAATGTTCCGCACTGTACAATGGGTATACAAATATACAAGTATACAATATACACAGG  
>HPV106\_Alpha\_71726710\_nt3841\_Genome\_Tile\_rc|1  
AAAAATCTCCAGGGTGTAGTATACACACGTGCCTACGTGCCCTTAATGTTCCGCACTGTA  
>HPV106\_Alpha\_71726710\_nt3861\_Genome\_Tile\_rc|1  
CAAACAGATAGCCAGCAAATAAAAAATCTCCAGGGTGTAGTATACACACGTGCCTACGTGC

>HPV106\_Alpha\_71726710\_nt3901\_Genome\_Tile\_rc|1  
AGAAAGCCAGAAACAAATAAGCAATAGCAGCAGGTGTGTCCAAACAGATAGCCAGCAAAT  
>HPV106\_Alpha\_71726710\_nt3941\_Genome\_Tile\_rc|1  
GCAAAAAAAAAACAAGAAATGCAGTAAAGCAGGACAGCATAGAAAGCCAGAAACAAATAA  
>HPV106\_Alpha\_71726710\_nt3961\_Genome\_Tile\_rc|1  
TTAGAAGGGCTATATACACAGCAAAAAAAAAACAAGAAATGCAGTAAAGCAGGACAGCAT  
>HPV106\_Alpha\_71726710\_nt4101\_Genome\_Tile\_rc|1  
CCCCTTATCACGCACCACTACAGGATACATAGTTGCACACTATGACACACAGGGAATATA  
>HPV106\_Alpha\_71726710\_nt4121\_Genome\_Tile\_rc|1  
GCAGGATATTCTGTATCACCCCCCTTATCACGCACCACTACAGGATACATAGTTGCACAC  
>HPV106\_Alpha\_71726710\_nt4141\_Genome\_Tile\_rc|1  
CTTGGGGTGTCCACAGTACAGCAGGATATTCTGTATCACCCCCCTTATCACGCACCACTA  
>HPV106\_Alpha\_71726710\_nt4161\_Genome\_Tile\_rc|1  
CAATAACAACAGTTTGTTCATCTTGGGGTGTCCACAGTACAGCAGGATATTCTGTATCACC  
>HPV106\_Alpha\_71726710\_nt4181\_Genome\_Tile\_rc|1  
AGACAAACTAACACCAGCAGCAATAACAACAGTTTGTTCATCTTGGGGTGTCCACAGTACA  
>HPV106\_Alpha\_71726710\_nt4241\_Genome\_Tile\_rc|1  
CATGTACATACAAAAGGTAAAACTACTGCAACAAACGAAGGTAACATAAAAAACACCAA  
>HPV106\_Alpha\_71726710\_nt4261\_Genome\_Tile\_rc|1  
ATATAAAACCCACCCTAGTACATGTACATACAAAAGGTAAAACTACTGCAACAAACGAA  
>HPV106\_Alpha\_71726710\_nt4281\_Genome\_Tile\_rc|1  
ATAACCCACACACCCAATAATATAAAACCCACCCTAGTACATGTACATACAAAAGGTAA  
>HPV106\_Alpha\_71726710\_nt4301\_Genome\_Tile\_rc|1  
AAACCACAAAAATATGTAAATATAACCCACACACCCAATAATATAAAACCCACCCTAGTA  
>HPV106\_Alpha\_71726710\_nt4681\_Genome\_Tile\_rc|1  
AGGCAACAATACTGGAATCCTCCACTAAGGTGACAATGGACGGTTCAGACGCCCAATTG  
>HPV106\_Alpha\_71726710\_nt5361\_Genome\_Tile\_rc|1  
GTCAGACACCAGAGGTTGCATTTCTAACTCTTCAGCAGGAGTAATTGGACTTATATCATG  
>HPV106\_Alpha\_71726710\_nt5441\_Genome\_Tile\_rc|1  
GAAGCTAAGGTGCCCTGACGCGACCCAGGCGTCTCGGTGTCAGCATAAATATCATATAAG  
>HPV106\_Alpha\_71726710\_nt5461\_Genome\_Tile\_rc|1  
AAGGTGTGGATGTGTGTATAGAAGCTAAGGTGCCCTGACGCGACCCAGGCGTCTCGGTGT  
>HPV106\_Alpha\_71726710\_nt5501\_Genome\_Tile\_rc|1  
GTGGAGACAGTGGATGATGCAGCCAATGAAGGCGCCTGCAAAGGTGTGGATGTGTGTATA  
>HPV106\_Alpha\_71726710\_nt5541\_Genome\_Tile\_rc|1  
ATCAAAGCTTGTTAGACAGGGGAACAGTAGTGTGCGATACTGTGGAGACAGTGGATGATGC  
>HPV106\_Alpha\_71726710\_nt5581\_Genome\_Tile\_rc|1  
AATCGGGAAGAGCACTGTCAGGGCCACTAAAAACAGGGACATCAAAGCTTGTTAGACAGGG  
>HPV106\_Alpha\_71726710\_nt5681\_Genome\_Tile\_rc|1  
AACACATATGAGGGCAATAAATAATATGTAGACCCGTGCACAAGCACATCGCCTGTGGGG  
>HPV106\_Alpha\_71726710\_nt5901\_Genome\_Tile\_rc|1  
GGGTTCCGTCCACTTTGCTTTTTTGATAGGATAATATGGATGACCTACGGTCAGCAATCGG  
>HPV106\_Alpha\_71726710\_nt6301\_Genome\_Tile\_rc|1  
AGATGTGAGTTCCAAAGGAGGACAATCCCTGCAGTGACATTGGAGGTATTGCATGGAGT  
>HPV106\_Alpha\_71726710\_nt6601\_Genome\_Tile\_rc|1  
TAGTGAGCTTGTAGCAGAGGCGCGGGATGTAGTAGTAGGCCCTTTAGTAAAAACCCTTC  
>HPV106\_Alpha\_71726710\_nt7061\_Genome\_Tile\_rc|1  
GCCCATCGTAAGGGTCCTTTTCTTTGTCAGGCGCCGCGGAGGGCTTTTGACATGTTATGG  
>HPV106\_Alpha\_71726710\_nt7241\_Genome\_Tile\_rc|1  
AGGAACGCTTGACCGTTTACGCTTTGTGGCTGGTGGGGTGGACGATGGTGCAGGACGCT  
>HPV106\_Alpha\_71726710\_nt7281\_Genome\_Tile\_rc|1  
ACAACAACAGGTACACCCAACCCACAGCAGCAACACAGTTAGGAACGCTTGGACCGTTTA  
>HPV106\_Alpha\_71726710\_nt7321\_Genome\_Tile\_rc|1  
AACCAACGTACATACATGCAGTACAACACACATTATATACACAACAACAGGTACACCCAA  
>HPV106\_Alpha\_71726710\_nt7341\_Genome\_Tile\_rc|1

CACACAGTCACAGCACATACAACCAACGTACATACATGCAGTACAACACACATTATATAC  
>HPV106\_Alpha\_71726710\_nt7361\_Genome\_Tile\_rc|1  
GGGGGGTCCCGCCCCATACACACACAGTCACAGCACATACAACCAACGTACATACATGCA  
>HPV106\_Alpha\_71726710\_nt7381\_Genome\_Tile\_rc|1  
CAGGAAACATACATACCAGGGGGGGTCCCGCCCCATACACACACAGTCACAGCACATAC  
>HPV106\_Alpha\_71726710\_nt7761\_Genome\_Tile\_rc|1  
CCTAAAAGTATAGTTTATTGAAGTGTGAGTAACATAGACAATATAGATTAAGAAATGCAT  
>HPV106\_Alpha\_71726710\_nt7881\_Genome\_Tile\_rc|1  
GTGTGGTAAACACATGTTTGAATTTGTTGAACAATTATATAAGACACATTGTTGAATAGC  
>HPV68a\_Alpha\_71726685\_nt0441\_Genome\_Tile\_rc|1  
GGCTTTGGTCCATGCATAGTTACTTAAACTTGTGTTTCTTGACGTATGCGTCTGCGGTCC  
>HPV68a\_Alpha\_71726685\_nt1081\_Genome\_Tile\_rc|1  
TAATTCCTGTAATGGCGACTTTGCTAAAGGACTGCTTTCTATACTGTCTGTATACTTTTCG  
>HPV68a\_Alpha\_71726685\_nt1101\_Genome\_Tile\_rc|1  
GTACTGCTTACATTTAGTGATAATTCCTGTAATGGCGACTTTGCTAAAGGACTGCTTTCT  
>HPV68a\_Alpha\_71726685\_nt1341\_Genome\_Tile\_rc|1  
TTATTGTTACATTGTAATAATACTTTAAGTTGGGTAGTAGGTGATTTAGGATCCTGGTTT  
>HPV68a\_Alpha\_71726685\_nt1361\_Genome\_Tile\_rc|1  
CTGTTAACATTGCAGCCTTTTTATTGTTACATTGTAATAATACTTTAAGTTGGGTAGTAG  
>HPV68a\_Alpha\_71726685\_nt1521\_Genome\_Tile\_rc|1  
TGGGTATACAATGCATATTGTTTAATTAGTGTTTTAAACCTTCCGCAATGGTTGGATTT  
>HPV68a\_Alpha\_71726685\_nt1541\_Genome\_Tile\_rc|1  
TTGTATCTAAACATTGTATATGGGTATACAATGCATATTGTTTAATTAGTGTTTTAAACC  
>HPV68a\_Alpha\_71726685\_nt1561\_Genome\_Tile\_rc|1  
TAGTATTAATATTCCAGTTTTTGTATCTAAACATTGTATATGGGTATACAATGCATATTG  
>HPV68a\_Alpha\_71726685\_nt3041\_Genome\_Tile\_rc|1  
GTAAATTGTACCCACACTACATAATGCATTGAGTTACTCTTGTCCTCCCATCATACCATAC  
>HPV68a\_Alpha\_71726685\_nt3141\_Genome\_Tile\_rc|1  
ACCTTTTCGTAATAGTTTTTTGTTGTTTCATACATATAATATACACCCAGTAATCCACAC  
>HPV68a\_Alpha\_71726685\_nt3381\_Genome\_Tile\_rc|1  
GCTCAGTGATTCCGCACTGTCTGGGATACTCCGAGACGACGTCGAGTTGTTTTTTTGG  
>HPV68a\_Alpha\_71726685\_nt3581\_Genome\_Tile\_rc|1  
TGTACATGATATATTGTCATACAAAGCGTTATGTTTTTGCAACCTATACCTAAGACATTT  
>HPV68a\_Alpha\_71726685\_nt3601\_Genome\_Tile\_rc|1  
CTACCCCTTATCCAATGCCATGTACATGATATATTGTCATACAAAGCGTTATGTTTTTGC  
>HPV68a\_Alpha\_71726685\_nt3741\_Genome\_Tile\_rc|1  
GTGGGTCAATACACACTTATAATGTCATATACCCCAATGACACAGTTACACTAGATGGTA  
>HPV68a\_Alpha\_71726685\_nt3761\_Genome\_Tile\_rc|1  
ATATACATATAGTGTACAGTGTGGGTCAATACACACTTATAATGTCATATACCCCAATGA  
>HPV68a\_Alpha\_71726685\_nt3941\_Genome\_Tile\_rc|1  
AAAAAAAAGTAGGTATACAGCAAACACCTCAAATGGTGTAGTTCTAACTAATATAAACAC  
>HPV68a\_Alpha\_71726685\_nt3961\_Genome\_Tile\_rc|1  
AATAACCACATAGGCAGTATAAAAAAAGTAGGTATACAGCAAACACCTCAAATGGTGTA  
>HPV68a\_Alpha\_71726685\_nt3981\_Genome\_Tile\_rc|1  
TATTAAGAGTAAGACTGTGTAATAACCACATAGGCAGTATAAAAAAAGTAGGTATACAG  
>HPV68a\_Alpha\_71726685\_nt4001\_Genome\_Tile\_rc|1  
CTATAACAGTTACTGTATAGTATTAAGAGTAAGACTGTGTAATAACCACATAGGCAGTAT  
>HPV68a\_Alpha\_71726685\_nt4021\_Genome\_Tile\_rc|1  
AACAACAATACAAATGCACACTATAACAGTTACTGTATAGTATTAAGAGTAAGACTGTGT  
>HPV68a\_Alpha\_71726685\_nt4041\_Genome\_Tile\_rc|1  
CATATTTATTTATACAAATAACAACAATACAAATGCACACTATAACAGTTACTGTATAG  
>HPV68a\_Alpha\_71726685\_nt4061\_Genome\_Tile\_rc|1  
CTGGCAGCACGGTGTGAAACCATATTTATTTATACAAATAAACAACAATACAAATGCACA  
>HPV68a\_Alpha\_71726685\_nt4561\_Genome\_Tile\_rc|1  
CACCTGTTTGTGGCACTTCTATTATAGTCGGGTCTGTAAATGCAGGGTTAGTAAACTAG

>HPV68a\_Alpha\_71726685\_nt4581\_Genome\_Tile\_rc|1  
AAACACATTACCAGACACCTCACCTGTTTGTGGCACTTCTATTATAGTCGGGTCTGTAAA  
>HPV68a\_Alpha\_71726685\_nt4961\_Genome\_Tile\_rc|1  
CGTGTAACATGGTCGCCTTTTTGCCTACTCTGCTAAAACGTACTGTTCCCTCTTCGGGAT  
>HPV68a\_Alpha\_71726685\_nt5061\_Genome\_Tile\_rc|1  
CTCAGGGGCAACCAATGGTTGTAGTTCAATGCTGTCAGCAGGGGTAATGTTACTAATATC  
>HPV68a\_Alpha\_71726685\_nt5081\_Genome\_Tile\_rc|1  
TTATCCATAGGGTCCGCCTGCTCAGGGGCAACCAATGGTTGTAGTTCAATGCTGTCAGCA  
>HPV68a\_Alpha\_71726685\_nt5101\_Genome\_Tile\_rc|1  
GTGCATATATATCATATAAGTTATCCATAGGGTCCGCCTGCTCAGGGGCAACCAATGGTT  
>HPV68a\_Alpha\_71726685\_nt5121\_Genome\_Tile\_rc|1  
TGTAGTATTGTCAGTATCAGGTGCATATATATCATATAAGTTATCCATAGGGTCCGCCTG  
>HPV68a\_Alpha\_71726685\_nt5141\_Genome\_Tile\_rc|1  
TGAAATGCAGTATCTAATACTGTAGTATTGTCAGTATCAGGTGCATATATATCATATAAG  
>HPV68a\_Alpha\_71726685\_nt5161\_Genome\_Tile\_rc|1  
GAGTAGTAAATGTAGCATTATGAAATGCAGTATCTAATACTGTAGTATTGTCAGTATCAG  
>HPV68a\_Alpha\_71726685\_nt5181\_Genome\_Tile\_rc|1  
AGGAACTGATATGTGGGAACGAGTAGTAAATGTAGCATTATGAAATGCAGTATCTAATAC  
>HPV68a\_Alpha\_71726685\_nt5201\_Genome\_Tile\_rc|1  
GATGCAGCAGAAGCCAATGAAGGAAGTATGTGGGAACGAGTAGTAAATGTAGCATTAT  
>HPV68a\_Alpha\_71726685\_nt5221\_Genome\_Tile\_rc|1  
TAGTATTAGTATATGTAGTGGATGCAGCAGAAGCCAATGAAGGAAGTATGTGGGAAC  
>HPV68a\_Alpha\_71726685\_nt5261\_Genome\_Tile\_rc|1  
GTATTTACAGCGTGTTCGAAGCAGTACCAAGAGGAATGGTAGTATTAGTATATGTAGTG  
>HPV68a\_Alpha\_71726685\_nt5321\_Genome\_Tile\_rc|1  
GGAGTAGAGGGTGTAAAGGCAACTGTGGGGTGTAGATGGTAATACAACATCAGGACCA  
>HPV68a\_Alpha\_71726685\_nt5341\_Genome\_Tile\_rc|1  
TGGCAAAGGTTGTATCAATTGGAGTAGAGGGTGTAAAGGCAACTGTGGGGTGTAGATG  
>HPV68a\_Alpha\_71726685\_nt5361\_Genome\_Tile\_rc|1  
ATTGGAACCATATATAGTTATGGCAAAGGTTGTATCAATTGGAGTAGAGGGTGTAAAGG  
>HPV68a\_Alpha\_71726685\_nt6001\_Genome\_Tile\_rc|1  
TACCAATTCCAATGGGGGACAGTCCCCTGTTGTACATTGGTAGGCTTACAAGATTTACC  
>HPV68a\_Alpha\_71726685\_nt6261\_Genome\_Tile\_rc|1  
TTAATATACATGTCAGTGGGAATAGTGTCCCCTACCATGCCTCCCCTATTCCAAAAATGC  
>HPV68a\_Alpha\_71726685\_nt6281\_Genome\_Tile\_rc|1  
TTTCACGAATGTCAGTGCCCTTAATATACATGTCAGTGGGAATAGTGTCCCCTACCATGC  
>HPV68a\_Alpha\_71726685\_nt6301\_Genome\_Tile\_rc|1  
ATACACATAACTACTAGGAGTTTCACGAATGTCAGTGCCCTTAATATACATGTCAGTGGG  
>HPV68a\_Alpha\_71726685\_nt6501\_Genome\_Tile\_rc|1  
GAATCATACACAGCTGGTACAGTAGAGTCTGTAGTAGTGGACAATGTAAAAATTAGTACTG  
>HPV68a\_Alpha\_71726685\_nt6721\_Genome\_Tile\_rc|1  
CTTTTGACATGTAATTGCTGCTGATTGTAGGTAGCGGTATGTATCTACAAGACTAGCAGA  
>HPV68a\_Alpha\_71726685\_nt6821\_Genome\_Tile\_rc|1  
ATGGGAATTGGTCCAGTTCAGAACTAAACTTTTCCTTTAAATCCACATTCCAAAAGTTAA  
>HPV68a\_Alpha\_71726685\_nt6841\_Genome\_Tile\_rc|1  
TAACAGAAATTTGCGTCCTAATGGGAATTGGTCCAGTTCAGAACTAAACTTTTCCTTTAA  
>HPV68a\_Alpha\_71726685\_nt6861\_Genome\_Tile\_rc|1  
CGTCTGCGAACACCTGCCTGTAACAGAAATTTGCGTCCTAATGGGAATTGGTCCAGTTCA  
>HPV68a\_Alpha\_71726685\_nt7001\_Genome\_Tile\_rc|1  
ATGACACATATACAACCACACAGACAAACAACATACAAAACAAGACATATAACAATTATT  
>HPV68a\_Alpha\_71726685\_nt7021\_Genome\_Tile\_rc|1  
CACAAACATACCAACACCAACATGACACATATACAACCACACAGACAAACAACATACAAAA  
>HPV68a\_Alpha\_71726685\_nt7161\_Genome\_Tile\_rc|1  
ATTATATGTAAAAACAAGGACATATGTTAGTCACAGGGTGCAACCACAAAGGACACGGACA  
>HPV68a\_Alpha\_71726685\_nt7261\_Genome\_Tile\_rc|1

AAATGGCCACACGGTATAGTTTGCACCATAAATATATTGCATATAATGTAACACACCTT  
>HPV68a\_Alpha\_71726685\_nt7281\_Genome\_Tile\_rc|1  
GCACACAACCCGGCCATACAAAATGGCCACACGGTATAGTTTGCACCATAAATATATTG  
>HPV68a\_Alpha\_71726685\_nt7361\_Genome\_Tile\_rc|1  
AAGGTAAACATGTTTTTGTCTGAAACACATAGGTTTTAATACTATCTAAAAGCAAATAGT  
>HPV68a\_Alpha\_71726685\_nt7381\_Genome\_Tile\_rc|1  
GCCAACTATGTGGGTAACCTCAAGGTAAAACATGTTTTTGTCTGAAACACATAGGTTTTAAT  
>HPV68a\_Alpha\_71726685\_nt7401\_Genome\_Tile\_rc|1  
CCAGTACGACTGTTACTGGTGCCAACCTATGTGGGTAACCTCAAGGTAAAACATGTTTTTGC  
>HPV68a\_Alpha\_71726685\_nt7541\_Genome\_Tile\_rc|1  
TGGCCAACCTATGCTATTAGGCAAGCAAAAACAGTTAAAACCTTTATGCCTAAAAGCAGTTT  
>HPV68a\_Alpha\_71726685\_nt7601\_Genome\_Tile\_rc|1  
TATTAGTCACTGTATAACTTACACTACCAGACAGATTCTTGAATGCAAAAAGTAGTTATAC  
>HPV68a\_Alpha\_71726685\_nt7621\_Genome\_Tile\_rc|1  
GCACAAATTTATGGATGTAGTATTAGTCACTGTATAACTTACACTACCAGACAGATTCTT  
>HPV68a\_Alpha\_71726685\_nt7681\_Genome\_Tile\_rc|1  
GAATAATTGTAAAATGTTATAAGTAAAAGTATTGGTATGTGTGCCCAACCTTTTTCGGTT  
>HPV80\_Beta\_2911565\_nt0281\_Genome\_Tile\_rc|1  
CAAACATTTGCGATCAAAACTTACTAACTCTATATAAGTTAAAAATCTTTGACAAAACCT  
>HPV80\_Beta\_2911565\_nt0421\_Genome\_Tile\_rc|1  
ACAGCTTTTCGCTCAACTACCTCAATCTCCCAACACACACTGACTGTTTCATAAAATGTA  
>HPV80\_Beta\_2911565\_nt0461\_Genome\_Tile\_rc|1  
TTTCTTTTAAACAAAATTTGCAACGAATAGTAATGTCTCCAACAGCTTTTCGCTCAACTAC  
>HPV80\_Beta\_2911565\_nt1481\_Genome\_Tile\_rc|1  
AATTAAAAAGTTGTTTGGAACTTTCTAATAGTTCGTCTTGACAGCATACACAGTTAATAC  
>HPV80\_Beta\_2911565\_nt1641\_Genome\_Tile\_rc|1  
TTCTAAGTTTGGCGGTTTCAGCTATTATTTGTACTTCTGATACTTGCAAAAAGATTAGTTA  
>HPV80\_Beta\_2911565\_nt2081\_Genome\_Tile\_rc|1  
CGCATTTAAAAACTGAATAAAATTAATCTCTTGATATCTAATAAACTTTACAATATCTGA  
>HPV80\_Beta\_2911565\_nt2101\_Genome\_Tile\_rc|1  
TTGTGTAAAAACAATTTAAACGCATTTAAAAACTGAATAAAATTAATCTCTTGATATCTA  
>HPV80\_Beta\_2911565\_nt2121\_Genome\_Tile\_rc|1  
AGCAGCTTTTCTTTGGAGTATTGTGTAAAAACAATTTAAACGCATTTAAAAACTGAATAA  
>HPV80\_Beta\_2911565\_nt3041\_Genome\_Tile\_rc|1  
ACTTTCTTCCATGTATCATCTAAAGTCTGATAATAAATGTGGGACCAGACAGTATAAACC  
>HPV80\_Beta\_2911565\_nt3921\_Genome\_Tile\_rc|1  
TATGTTAATAAAAAGCTGTCTCTCAGTGTTTGAAGTAAATGCAAGTAACATCCGTGAACG  
>HPV80\_Beta\_2911565\_nt4021\_Genome\_Tile\_rc|1  
GCAAAAAGCAAAAATAGCGCTTGTTAGTTAATTACAGGCACATGGGCTACAAATCATCTA  
>HPV80\_Beta\_2911565\_nt4881\_Genome\_Tile\_rc|1  
ACTTGTTTCAGTTAATCTTCGGTTATATAAAGCTCTTCGAAGACTTGAAAAGAGACTGAACT  
>HPV80\_Beta\_2911565\_nt5421\_Genome\_Tile\_rc|1  
GTACTACGCCTTGCATTACCAAATACTAATTGAGACCCGCTAAAATCTTCTATATGATCT  
>HPV80\_Beta\_2911565\_nt5441\_Genome\_Tile\_rc|1  
GAGGAACCTGTGTATGTAGTAGTACTACGCCCTTGCATTACCAAATACTAATTGAGACCCGC  
>HPV80\_Beta\_2911565\_nt5501\_Genome\_Tile\_rc|1  
CTACATTATAGCCCTGAACATCCTGAATATAAAATCCAGTATTTCTAGGAGACTCAAATC  
>HPV80\_Beta\_2911565\_nt6101\_Genome\_Tile\_rc|1  
GAAGTATTCTGTCTGTCATCAGTAGAACCTCCCTGGTAGCCACTATTATTTTCTGTGTCC  
>HPV80\_Beta\_2911565\_nt6241\_Genome\_Tile\_rc|1  
CAGTATTTTTTAAGTTCTAATGGAGGACATTTTCCAGCTTGGTTATTTTCTTCTGATGCAC  
>HPV80\_Beta\_2911565\_nt6761\_Genome\_Tile\_rc|1  
GTATTATATTCAGTTATAGTACTACCATCAGAAGTAACACTTATGGTGAAATTAGTGTTT  
>HPV80\_Beta\_2911565\_nt7141\_Genome\_Tile\_rc|1  
AAGATCTGATGGTTTTGGGACGTCTTTGTAAACCTGCCTGAAATATAAAATTCCTTCCTA



>HPV77\_Alpha\_2911558\_nt0061\_Genome\_Tile\_rc|1  
GTCCATCACTTGTAGACATAGCTACTGCCAGGCTGTACTGACGCCCTTTTATATGTCTCT  
>HPV77\_Alpha\_2911558\_nt3861\_Genome\_Tile\_rc|1  
AGGGCTAAATAGCAGTGTAGCACAGTTCTATGTAAATACAGACATGTGGCCTAAAATGGC  
>HPV77\_Alpha\_2911558\_nt4061\_Genome\_Tile\_rc|1  
TATGATAGGATACATGGTAGTGTACTGATTATTGCGTGCAATGCGAGAAACAACCTGTA  
>HPV77\_Alpha\_2911558\_nt4181\_Genome\_Tile\_rc|1  
TCCCAAGTGTCTATATACAATAAACAATAATAAGCATACAAACAGTATTAACAAACCCAA  
>HPV77\_Alpha\_2911558\_nt4201\_Genome\_Tile\_rc|1  
AGCATACAACATTACAATAATCCCAAGTGTCTATATACAATAAACAATAATAAGCATACA  
>HPV77\_Alpha\_2911558\_nt4221\_Genome\_Tile\_rc|1  
TACACCACATCTATAAGTGCAGCATACAACATTACAATAATCCCAAGTGTCTATATACAA  
>HPV77\_Alpha\_2911558\_nt4241\_Genome\_Tile\_rc|1  
GGCCACGTATGAAATACAAGTACACCACATCTATAAGTGCAGCATACAACATTACAATAA  
>HPV77\_Alpha\_2911558\_nt4261\_Genome\_Tile\_rc|1  
GTACACATACACAATCCAATGGCCACGTATGAAATACAAGTACACCACATCTATAAGTGC  
>HPV77\_Alpha\_2911558\_nt4281\_Genome\_Tile\_rc|1  
AAAAAGTGGTACAAAAGCAAGTACACATACACAATCCAATGGCCACGTATGAAATACAAG  
>HPV77\_Alpha\_2911558\_nt4301\_Genome\_Tile\_rc|1  
AAAACAAAAACACAAAACAAAAAAGTGGTACAAAAGCAAGTACACATACACAATCCAAT  
>HPV77\_Alpha\_2911558\_nt4321\_Genome\_Tile\_rc|1  
TTTATTCAACTGCAAAGAAAAAACAAAAACACAAAACAAAAAAGTGGTACAAAAGCAA  
>HPV77\_Alpha\_2911558\_nt4841\_Genome\_Tile\_rc|1  
GCACTTCTACCAAGTGACGGCTCAGTATACAAAGGATTAGTGAAGTTTGTGCTAGTAACTA  
>HPV77\_Alpha\_2911558\_nt5461\_Genome\_Tile\_rc|1  
CCCCAAAAGAGGTAAGATTGCGACCACTGTTCTGTAAGGCCACGTACGCATCGTCTACATC  
>HPV77\_Alpha\_2911558\_nt5501\_Genome\_Tile\_rc|1  
TGGACAGTGCAGAAGGGAGGGAGGACGATGCACCGCGACCCCCAAAAGAGGTAAGATTGC  
>HPV77\_Alpha\_2911558\_nt5521\_Genome\_Tile\_rc|1  
TGTTACATTGCCAATCTTAGTGGACAGTGCAGAAGGGAGGGAGGACGATGCACCGCGACC  
>HPV77\_Alpha\_2911558\_nt5581\_Genome\_Tile\_rc|1  
AGGCAAAACAATGTCGGGGCCAGTGTGTAAATGCACATCCACCGGAGATATAAATGGAAT  
>HPV77\_Alpha\_2911558\_nt6301\_Genome\_Tile\_rc|1  
ATTAACTCCAAGGGAGGACAGTCTCCTGGGGTAGTATTAGTACGTGCACAAGGGGTACCC  
>HPV77\_Alpha\_2911558\_nt6561\_Genome\_Tile\_rc|1  
TGAGGTACAAAGATTCTGGAATTTTGTCTCCAACATCACCCGCACGATTGAAAAAGTGTC  
>HPV77\_Alpha\_2911558\_nt6581\_Genome\_Tile\_rc|1  
CTCACGCCCCGCTACTCCCTTTGAGGTACAAAGATTCTGGAATTTTGTCTCCAACATCACC  
>HPV77\_Alpha\_2911558\_nt7221\_Genome\_Tile\_rc|1  
GTTTGGTTCGAAGCTGGGGAGGGGTGGGCGCCCGGCGTTTGGCGAGAGGGAACCACCGAAC  
>HPV77\_Alpha\_2911558\_nt7321\_Genome\_Tile\_rc|1  
TACCATACAAAACACATGCAATACACAGTACACATACATAGTTGTCTGTAACATACATAC  
>HPV77\_Alpha\_2911558\_nt7341\_Genome\_Tile\_rc|1  
AGTTGTTGTATACACACATACCATACAAAACACATGCAATACACAGTACACATACATA  
>HPV76\_Beta\_2911551\_nt0001\_Genome\_Tile\_rc|1  
TTACCGTCGCTCTTCTGCTGCCAAAATGTTCTCGGCCAAAATCGTTGTTGGAACAAATCTG  
>HPV76\_Beta\_2911551\_nt0461\_Genome\_Tile\_rc|1  
TAAATCCAGGCGTTTCAAACAAAATTGACACCTTATTATAATGTTCTGCTATATTTTCTGC  
>HPV76\_Beta\_2911551\_nt4141\_Genome\_Tile\_rc|1  
TAATATATTAGTAGTGAAGCAAGGTTAGTGGTTAATTAATGTTTATAACCTATCAAAGT  
>HPV76\_Beta\_2911551\_nt4801\_Genome\_Tile\_rc|1  
GGCCACCTGAGCCACTGGTAACTACAATTTGGTCTGACAATGCGGATTCCCCTAGTGTTG  
>HPV76\_Beta\_2911551\_nt5141\_Genome\_Tile\_rc|1  
CTTAGTTTAGCTATATCCAAAAGTCTCTATTAGGTGGCTCCTCAACAGTAGCTACATCT  
>HPV76\_Beta\_2911551\_nt5161\_Genome\_Tile\_rc|1

TGTCTGAATATAGTGGACGACTTAGTTTGTAGCTATATCCAAAAAGTCTCTATTAGGTGGCT  
>HPV76\_Beta\_2911551\_nt5261\_Genome\_Tile\_rc|1  
TCTTTATAGAAATGTACCTGAGCCCCCTACAGTAGCACCATTCTAGTCCTTATAGAGGCT  
>HPV76\_Beta\_2911551\_nt5581\_Genome\_Tile\_rc|1  
ACACTGTATAACCCTCTAAGTCCTGCACATAAAATGTATCTGCTCGGGGTGTTGTAAATC  
>HPV76\_Beta\_2911551\_nt6041\_Genome\_Tile\_rc|1  
AGTCTTTCTTCTCAGGATTATAGACATTCATGTCTACCAAGGCGAATCTATTGGGATCT  
>HPV76\_Beta\_2911551\_nt6341\_Genome\_Tile\_rc|1  
ATATCTCCATCTTCTATTACAGTATTTACCAGTTCCAAAGGTGGACATTTGCCTACCCCT  
>HPV76\_Beta\_2911551\_nt7141\_Genome\_Tile\_rc|1  
ATGACAATTTCTCAGTTAGATCCACTTGCCAAAAATTGTATTGCTCATATGGATCCTTTT  
>HPV75\_Beta\_2911544\_nt0461\_Genome\_Tile\_rc|1  
TATATCCAAACGTTTCAGACAAAACCTGGCACCTTACAATAAGATTATGTATACTTTCTGC  
>HPV75\_Beta\_2911544\_nt5121\_Genome\_Tile\_rc|1  
CTGGACGACTGAGCTTTGCTATATCTAAAAATCCCTATTTGGGGGTTCCTCAATAGTAG  
>HPV75\_Beta\_2911544\_nt5241\_Genome\_Tile\_rc|1  
TACTTAAATCTGTATAAAAAATGAACCTGAGCTCCTACAGTAGCCCCACTCCTGGTTCTAA  
>HPV73\_Alpha\_1491692\_nt0061\_Genome\_Tile\_rc|1  
CTGAATTGGGAAACAGCATTTCCCAATCTGTAGCGTTTTTTGCTTTTCCTACTTTTATATG  
>HPV73\_Alpha\_1491692\_nt0121\_Genome\_Tile\_rc|1  
TATCATGTATAGAAATATTCACTTCGTCACATAACGCTTGTAGCTTGTATGGTCGTTCTT  
>HPV73\_Alpha\_1491692\_nt0141\_Genome\_Tile\_rc|1  
AAACACACAGTCCAGGTTTATATCATGTATAGAAATATTCACTTCGTCACATAACGCTTG  
>HPV73\_Alpha\_1491692\_nt0301\_Genome\_Tile\_rc|1  
TGCCATATACTGATTGTCTATATCGCCTATACTCTCTAATTTTAGAATAAAATTTTAAAC  
>HPV73\_Alpha\_1491692\_nt0321\_Genome\_Tile\_rc|1  
AGTTAAATTTTCTAACGTAGTGCCATATACTGATTGTCTATATCGCCTATACTCTCTAAT  
>HPV73\_Alpha\_1491692\_nt0721\_Genome\_Tile\_rc|1  
CACTCTTAAATCAGCTTTGTTGCTTTCAATGGCAAGGCATACTGTGCACTGACACTTCGT  
>HPV73\_Alpha\_1491692\_nt0741\_Genome\_Tile\_rc|1  
CCCATAAGCAACTCTTCTATCACTCTTAAATCAGCTTTGTTGCTTTCAATGGCAAGGCAT  
>HPV73\_Alpha\_1491692\_nt1141\_Genome\_Tile\_rc|1  
ACTTATTGACAATACATTTATTTGTGGACTAAGCTGTTTGTCTATGAATTCATCTCTTTT  
>HPV73\_Alpha\_1491692\_nt1161\_Genome\_Tile\_rc|1  
TTAGATGTACTTCTACCGCTACTTATTGACAATACATTTATTTGTGGACTAAGCTGTTTG  
>HPV73\_Alpha\_1491692\_nt1281\_Genome\_Tile\_rc|1  
CCTTCTTCATTAACATTTTGTAAACACCCCTACCCCTGCCCAAGTCCCGGTACCTCTGTC  
>HPV73\_Alpha\_1491692\_nt1321\_Genome\_Tile\_rc|1  
GGACCCACTACTGCTTTCACGTGGCGACACAATTTGGTTGCCTTCTTCATTAACATTTTG  
>HPV73\_Alpha\_1491692\_nt1421\_Genome\_Tile\_rc|1  
TTGCTAGCAATGCTGCTTTTGCATTATTCCTTTGTAATAAATTTGTAATATCTGTTATAG  
>HPV73\_Alpha\_1491692\_nt1581\_Genome\_Tile\_rc|1  
TGTATATACATACAATACTGTGTTAGTAAGGATTTTAAACTTTCTGCAAGTGAGGGTATT  
>HPV73\_Alpha\_1491692\_nt2141\_Genome\_Tile\_rc|1  
TTTGATATCTTAGGAATAGCACAAATATCTTCCAATTACCACCATCATTAGTTAAATCAC  
>HPV73\_Alpha\_1491692\_nt2161\_Genome\_Tile\_rc|1  
AAAAGGCATAAATTCATATTTTGATATCTTAGGAATAGCACAAATATCTTCCAATTACC  
>HPV73\_Alpha\_1491692\_nt2181\_Genome\_Tile\_rc|1  
AATTGTTTAAATGTAATTAATAAAGGCATAAATTCATATTTTGATATCTTAGGAATAGC  
>HPV73\_Alpha\_1491692\_nt3121\_Genome\_Tile\_rc|1  
GCCCACCCCTTCATACCAACAATATATATGTGTCCAAATACATATTGCATGCTATTG  
>HPV73\_Alpha\_1491692\_nt3141\_Genome\_Tile\_rc|1  
CTATTTTGTCTACCTACCTTTGCCACCCCTTCATACCAACAATATATATGTGTCCAAA  
>HPV73\_Alpha\_1491692\_nt3701\_Genome\_Tile\_rc|1  
AGTTTGTGGTATTTTACATGTTGTAAAAAATGTTGTTGTTGCAATACAGTTGTAAACAT

>HPV73\_Alpha\_1491692\_nt3721\_Genome\_Tile\_rc|1  
TATCCTGATGTAAC TACAATAGTTTGTGGTATTTTTACATGTTGTAAAAAATGTTGTTGT  
>HPV73\_Alpha\_1491692\_nt3741\_Genome\_Tile\_rc|1  
ACCAATGTTACAAAGACATGTATCCTGATGTAAC TACAATAGTTTGTGGTATTTTTACAT  
>HPV73\_Alpha\_1491692\_nt3761\_Genome\_Tile\_rc|1  
AGAATCATATATACTGTGTAACCAATGTTACAAAGACATGTATCCTGATGTAAC TACAAT  
>HPV73\_Alpha\_1491692\_nt3781\_Genome\_Tile\_rc|1  
ACAAAAATACAAATATACAAAGAATCATATATACTGTGTAACCAATGTTACAAAGACATG  
>HPV73\_Alpha\_1491692\_nt3801\_Genome\_Tile\_rc|1  
CAAAACAAAAGCCAACACAAAACAAAATACAAATATACAAAGAATCATATATACTGTGTA  
>HPV73\_Alpha\_1491692\_nt3921\_Genome\_Tile\_rc|1  
CAAAACATATAAAAAAATACTTTTAAACAATGATTGTGATACATGTATAAAGGTTATTAT  
>HPV73\_Alpha\_1491692\_nt4001\_Genome\_Tile\_rc|1  
GTTTATTATATATGTAAAATTGTTTATGTTATTTGTAATGTAGCATGGTAATGTACAAGT  
>HPV73\_Alpha\_1491692\_nt4021\_Genome\_Tile\_rc|1  
TACACTAAAAATATTAGGCAGTTTATTATATATGTAAAATTGTTTATGTTATTTGTAATG  
>HPV73\_Alpha\_1491692\_nt4341\_Genome\_Tile\_rc|1  
AGAAGAATCTGAAGGCCCAACAGACGTAACAAC TGTGGTCGTATAGGTTGTAATGGAAT  
>HPV73\_Alpha\_1491692\_nt4361\_Genome\_Tile\_rc|1  
TCTTCCACTAATGAAACAATAGAAGAATCTGAAGGCCCAACAGACGTAACAAC TGTGGT  
>HPV73\_Alpha\_1491692\_nt4401\_Genome\_Tile\_rc|1  
AGATGTAGGACCAGGTATACCTGACTCTATAAACTTGATTCTTCCACTAATGAAACAAT  
>HPV73\_Alpha\_1491692\_nt4421\_Genome\_Tile\_rc|1  
CCTGAAGTAGAAGGCAC TATAGATGTAGGACCAGGTATACCTGACTCTATAAACTTGAT  
>HPV73\_Alpha\_1491692\_nt4441\_Genome\_Tile\_rc|1  
CAGAAGTTGTAATATCAAACCTGAAGTAGAAGGCAC TATAGATGTAGGACCAGGTATAC  
>HPV73\_Alpha\_1491692\_nt5081\_Genome\_Tile\_rc|1  
ATACTAGGTGTTTGTGGTGTAACTAAAGGTTGCATTTCAATATCATTAGTAGGTATAGGA  
>HPV73\_Alpha\_1491692\_nt5141\_Genome\_Tile\_rc|1  
TCTACATCATTTGTCTAAAAACACATCATATAACCCATCATTAATACTACTACCAGTTACT  
>HPV73\_Alpha\_1491692\_nt5161\_Genome\_Tile\_rc|1  
TTTGTGTGTAGTACAGTCTCTTCTACATCATTTGTCTAAAAACACATCATATAACCCATCAT  
>HPV73\_Alpha\_1491692\_nt5181\_Genome\_Tile\_rc|1  
TATACTTGTAGGTGTATATGTTTGTGTAGTACAGTCTCTTCTACATCATTTGTCTAAAA  
>HPV73\_Alpha\_1491692\_nt5221\_Genome\_Tile\_rc|1  
TTGCAGTAGAAATATCACTACTAACTAACTATTACTATGTATACTTGTAGGTGTATATG  
>HPV73\_Alpha\_1491692\_nt5301\_Genome\_Tile\_rc|1  
TGTAGAAGGTAGTGGTAAAGCAATATCTGGACCAGGATGTGTGTCTAACCCAGTACTAAA  
>HPV73\_Alpha\_1491692\_nt5401\_Genome\_Tile\_rc|1  
GCTTTAAACAAATAATACTAGGGTGTAATATAAAACCTGACCCATAAAATATATATAGGAC  
>HPV73\_Alpha\_1491692\_nt5601\_Genome\_Tile\_rc|1  
CGTTTTTGTAGAATCCTTGATAGGAAAATATGGGTGTCCACAGCCAACAAACGTGTGCTA  
>HPV73\_Alpha\_1491692\_nt5861\_Genome\_Tile\_rc|1  
CTCTACCATCTGTATTTTGTCCAGCAATGTATTTAGGAGCATTTTCAGTATCATCTAATT  
>HPV73\_Alpha\_1491692\_nt5881\_Genome\_Tile\_rc|1  
ATAATCCACTGACATACATTCTCTACCATCTGTATTTTGTCCAGCAATGTATTTAGGAGC  
>HPV73\_Alpha\_1491692\_nt6001\_Genome\_Tile\_rc|1  
CTTTAATTCCAGTGGGGGACAATCACCAGTATTAACAGTTTGTGAAGTACATGGCGTGCC  
>HPV73\_Alpha\_1491692\_nt6501\_Genome\_Tile\_rc|1  
GCATACGTTGTAGTAGAGCTACTAGCCTGTGTACCTACACATACAGAAAAATTAGTGCTT  
>HPV73\_Alpha\_1491692\_nt6521\_Genome\_Tile\_rc|1  
ATTCTTTAAAAATTAGAGTTGGCATAACGTTGTAGTAGAGCTACTAGCCTGTGTACCTACAC  
>HPV73\_Alpha\_1491692\_nt6921\_Genome\_Tile\_rc|1  
TTAGGTGTGGCAC TTGTGGTAGCAGATGCAGAACGTTTAGAAGCTTGTAAC TTAGGACGT  
>HPV73\_Alpha\_1491692\_nt7001\_Genome\_Tile\_rc|1

CAAACATACAAAACACATGTAACATACAACAAACAACACATACACATTACACTTATTAAA  
>HPV73\_Alpha\_1491692\_nt7081\_Genome\_Tile\_rc|1  
ATACATATATATAAAACAAACAGTTATACACATGTACATAAACATACACACAGTATTAGTA  
>HPV73\_Alpha\_1491692\_nt7141\_Genome\_Tile\_rc|1  
TTAAACATACATACAAACATTACTACACATACACATACACATACACATACACACAAATAC  
>HPV73\_Alpha\_1491692\_nt7161\_Genome\_Tile\_rc|1  
CAACACACATATAAACTTTTATTAAACATACATACAAACATTACTACACATACACATACAC  
>HPV73\_Alpha\_1491692\_nt7181\_Genome\_Tile\_rc|1  
AGTCAAGTAAACCACCCACACAACACACATATAAACTTTTATTAAACATACATACAAACAT  
>HPV73\_Alpha\_1491692\_nt7201\_Genome\_Tile\_rc|1  
ATACAAAATGGAAGCACAGTAGTCAAGTAAACCACCCACACAACACACATATAAACTTTA  
>HPV73\_Alpha\_1491692\_nt7221\_Genome\_Tile\_rc|1  
ATGCATGTAAAATGGCGACTATACAAAATGGAAGCACAGTAGTCAAGTAAACCACCCACA  
>HPV73\_Alpha\_1491692\_nt7241\_Genome\_Tile\_rc|1  
CGGTTGCCCTTTTACCTTAATGCATGTAAAATGGCGACTATACAAAATGGAAGCACAGT  
>HPV73\_Alpha\_1491692\_nt7381\_Genome\_Tile\_rc|1  
TTACCTTTATAACCTTGCGTGGGATGAACATGTAAAGGAAACAAACCTGCCAAGTTGCC  
>HPV73\_Alpha\_1491692\_nt7581\_Genome\_Tile\_rc|1  
GCAGTATGAGTAACACGTTATTACTCATTATATAAAACAATTACTTGGCATTAAAAACA  
>HPV73\_Alpha\_1491692\_nt7601\_Genome\_Tile\_rc|1  
ATAGGTTTAACCTTTTAGGTGCAGTATGAGTAACACGTTATTACTCATTATATAAAACAAT  
>HPV59\_Alpha\_557236\_nt0021\_Genome\_Tile\_rc|1  
TGTGTAGGATCCTCAAAGCGTGCCATGCCGTTGCCCTTTTCTTTTCAACTACCTTTATAT  
>HPV59\_Alpha\_557236\_nt0101\_Genome\_Tile\_rc|1  
TGCAAAACACACAATTGATGCGAATATCATGCAGAGGAATATTCAATGTTGTGCTCAAAT  
>HPV59\_Alpha\_557236\_nt0161\_Genome\_Tile\_rc|1  
ACACTATAAAATAAGTCATTAAAAGCAAATTCAAATACCTCTCTTTCTTGCAAGTTCCCCTT  
>HPV59\_Alpha\_557236\_nt0201\_Genome\_Tile\_rc|1  
ATGCATTTTCAGACACGCTGCATACGGTGTACAGTCTCTATACACTATAAAATAAGTCATTA  
>HPV59\_Alpha\_557236\_nt0221\_Genome\_Tile\_rc|1  
TTRACTCTTGCAATAAATGAAATGCATTTTCAGACACGCTGCATACGGTGTACAGTCTCTAT  
>HPV59\_Alpha\_557236\_nt0241\_Genome\_Tile\_rc|1  
TCTATAATATCTTAATTCTCTTACTCTTGCAATAAATGAAATGCATTTTCAGACACGCTGC  
>HPV59\_Alpha\_557236\_nt0281\_Genome\_Tile\_rc|1  
TCTTGCTTTCAGCCTCTAATGTTTCTCCATACACGGAATCTCTATAATATCTTAATTCTC  
>HPV59\_Alpha\_557236\_nt0321\_Genome\_Tile\_rc|1  
AGGCATCTATAACAGCGTATCAGCAGCTCATGTAACGGTGTCTTGCTTTCAGCCTCTAAT  
>HPV59\_Alpha\_557236\_nt0341\_Genome\_Tile\_rc|1  
CTGTTGGACATAGAGGTTTTAGGCATCTATAACAGCGTATCAGCAGCTCATGTAACGGTG  
>HPV59\_Alpha\_557236\_nt0361\_Genome\_Tile\_rc|1  
AGTTATATGCTTTAATTTATCTGTTGGACATAGAGGTTTTAGGCATCTATAACAGCGTAT  
>HPV59\_Alpha\_557236\_nt0401\_Genome\_Tile\_rc|1  
CTGTATATATTCAGCTATATTATGGAATCTTCTTTTTTTCAGTTATATGCTTTAATTTAT  
>HPV59\_Alpha\_557236\_nt0461\_Genome\_Tile\_rc|1  
TACGCGCTTGTCGTTGCTGTCTTAGGTGTCTTGCTCGGGTCCGACACCCACGACACTGTC  
>HPV59\_Alpha\_557236\_nt0481\_Genome\_Tile\_rc|1  
GTTTTACACCAAGTGTTCCTACTACGCGCTTGCTGTTGCTGTCTTAGGTGTCTTGCTCGGGT  
>HPV59\_Alpha\_557236\_nt0501\_Genome\_Tile\_rc|1  
TTGCTTTTGGTCCATGCATTGTTTTACACCAAGTGTTCCTACTACGCGCTTGCTGTTGCTGT  
>HPV59\_Alpha\_557236\_nt0561\_Genome\_Tile\_rc|1  
ACACAAGGTCAACTTCCTCATAATTTGTGGTTCCAAATCTAAACAATGTCACAAAGTG  
>HPV59\_Alpha\_557236\_nt0581\_Genome\_Tile\_rc|1  
GTCAGGTAATTGCTCGTAGCACACAAGGTCAACTTCCTCATAATTTTGTGGTTCCAAATC  
>HPV59\_Alpha\_557236\_nt0621\_Genome\_Tile\_rc|1  
TAACTCCATCTGGTTCATCTTTTTCATTCTCGGAGTCGGAGTCAGGTAATTGCTCGTAGC

>HPV59\_Alpha\_557236\_nt1141\_Genome\_Tile\_rc|1  
AATGGTGA CT TAGCTTTTTTTCCTGCGCGCTTTCTCACTACTGTTTTCTATACTGCAC  
>HPV59\_Alpha\_557236\_nt1161\_Genome\_Tile\_rc|1  
CATTTACTGATATTTCTTGTAATGGTGA CT TAGCTTTTTTTCCTGCGCGCTTTCTCAC  
>HPV59\_Alpha\_557236\_nt1181\_Genome\_Tile\_rc|1  
TTTTACTTTTGGGTGGTTAACATTTACTGATATTTCTTGTAATGGTGA CT TAGCTTTTTT  
>HPV59\_Alpha\_557236\_nt1201\_Genome\_Tile\_rc|1  
GGCACTGTTATTAACCTTCTTTTTACTTTTGGGTGGTTAACATTTACTGATATTTCTTGT  
>HPV59\_Alpha\_557236\_nt1321\_Genome\_Tile\_rc|1  
TCGCTACAGTCTATTTGACTGTGCTACAAACACTGCCATTGCTATCCCCATTTCCAGTA  
>HPV59\_Alpha\_557236\_nt1341\_Genome\_Tile\_rc|1  
CAACATCCATGTTACTGCTGTCGCTACAGTCTATTTGACTGTGCTACAAACACTGCCAT  
>HPV59\_Alpha\_557236\_nt1361\_Genome\_Tile\_rc|1  
GGATGTTGGA ACTATGTTTTCAACATCCATGTTACTGCTGTCGCTACAGTCTATTTGACT  
>HPV59\_Alpha\_557236\_nt1381\_Genome\_Tile\_rc|1  
TGTAACAATTGATTAGTGGGGGATGTTGGA ACTATGTTTTCAACATCCATGTTACTGCTG  
>HPV59\_Alpha\_557236\_nt1401\_Genome\_Tile\_rc|1  
TATTTTTGCTATGTAATAACTGTAACAATTGATTAGTGGGGGATGTTGGA ACTATGTTTT  
>HPV59\_Alpha\_557236\_nt1421\_Genome\_Tile\_rc|1  
TGCATACATAGCTGCTTTCTTATTTTTGCTATGTAATAACTGTAACAATTGATTAGTGGG  
>HPV59\_Alpha\_557236\_nt1441\_Genome\_Tile\_rc|1  
CCATACAATTCTTTAAATTTTGCTATAGCTGCTTTCTTATTTTTGCTATGTAATAAC  
>HPV59\_Alpha\_557236\_nt2541\_Genome\_Tile\_rc|1  
ATCTGCTATTTAAATATGGCCACCTGTTATCTGTA ACTGGATTTGTATTTGATGTAATAA  
>HPV59\_Alpha\_557236\_nt2561\_Genome\_Tile\_rc|1  
TGGAAATTTAAATACCATTAATCTGCTATTTAAATATGGCCACCTGTTATCTGTA ACTGG  
>HPV59\_Alpha\_557236\_nt2781\_Genome\_Tile\_rc|1  
GTTTATGTGTTCAATTAATGTCTTTACTATCGTTTTTCATAATGTTCTAATATTTGATCCTG  
>HPV59\_Alpha\_557236\_nt2801\_Genome\_Tile\_rc|1  
ATACGCACCAGTTTCCAATAGTTTATGTGTTCAATTAATGTCTTTACTATCGTTTTTCATAA  
>HPV59\_Alpha\_557236\_nt2821\_Genome\_Tile\_rc|1  
CAAATAAAATTACATTTTCCATACGCACCAGTTTCCAATAGTTTATGTGTTCAATTAATGT  
>HPV59\_Alpha\_557236\_nt2841\_Genome\_Tile\_rc|1  
TATATTGTTCTCTCTTGCTGCAAATAAAATTACATTTTCCATACGCACCAGTTTCCAATA  
>HPV59\_Alpha\_557236\_nt2941\_Genome\_Tile\_rc|1  
GCATTACAGTGGAAGTACGGTTTGACTGCAGTTCAATAGCTTCACATGCCTTGTTTTTAG  
>HPV59\_Alpha\_557236\_nt3081\_Genome\_Tile\_rc|1  
GTAATGCATTGTGTTTTCTTGCTGCAGATGGCGTTAGAGAGTTTGGCACAACTGAGTT  
>HPV59\_Alpha\_557236\_nt3101\_Genome\_Tile\_rc|1  
TATATAAATGTCCAGCTTGTTGTAATGCATTGTGTTTTCTTGCTGCAGATGGCGTTAGAG  
>HPV59\_Alpha\_557236\_nt3161\_Genome\_Tile\_rc|1  
AGTCCCCAAAAGTCCACATTTCTGTGGTTTTACACCACTGTCCTACATCATTTACATAA  
>HPV59\_Alpha\_557236\_nt3181\_Genome\_Tile\_rc|1  
CCTCTTCCACTTTATAATATAGTCCCCAAAAGTCCACATTTCTGTGGTTTTACACCACT  
>HPV59\_Alpha\_557236\_nt3241\_Genome\_Tile\_rc|1  
ACTTGTCTGTAGTCCCATATTTTTTGGCATCATGTATAAATTTTACATAGTACACCTGTT  
>HPV59\_Alpha\_557236\_nt3381\_Genome\_Tile\_rc|1  
GCCCCAAGTACGTGGCTTCGGGGGGCGTTGCGGAGGGGTATGATAGTTGCTCAGAAGATCC  
>HPV59\_Alpha\_557236\_nt3401\_Genome\_Tile\_rc|1  
TGACGGTTCCACGTTTGGGGGCCAAGTACGTGGCTTCGGGGGGCGTTGCGGAGGGGTAT  
>HPV59\_Alpha\_557236\_nt3461\_Genome\_Tile\_rc|1  
CTGGTAGACTGAGGGTGCTGTGTGTATCCACACTGTCTTGGTTCGCTTTCCAGTCTTCGTC  
>HPV59\_Alpha\_557236\_nt3481\_Genome\_Tile\_rc|1  
CACAGTAGTCCACTGACACGCTGGTAGACTGAGGGTGCTGTGTGTATCCACACTGTCTTG  
>HPV59\_Alpha\_557236\_nt3521\_Genome\_Tile\_rc|1

CGCGGGTTGTTGCCTGGATGCAAACGGACGACTGGGTTGTCACAGTAGTCCACTGACACG  
>HPV59\_Alpha\_557236\_nt3661\_Genome\_Tile\_rc|1  
TTCCTGTCCAATGCCAGGTAGAGGAAATATTTTCAAATAACCAGTGTACTTTTCTTAATC  
>HPV59\_Alpha\_557236\_nt3721\_Genome\_Tile\_rc|1  
TGCGTTGTGTTTCGCTTGTATATGTTAATGTTAAATGCCTGTTTTGGCTGATCCTCTGT  
>HPV59\_Alpha\_557236\_nt3741\_Genome\_Tile\_rc|1  
TACAGTATCTAAAAATTCATTGCGTTGTGTTTCGCTTGTATATGTTAATGTTAAATGCC  
>HPV59\_Alpha\_557236\_nt3781\_Genome\_Tile\_rc|1  
TCATATACCCAACATGTATTTGTACACTATTAGGAATTTTTACAGTATCTAAAAATTCAT  
>HPV59\_Alpha\_557236\_nt3801\_Genome\_Tile\_rc|1  
GCATAACAACCATTTACACACTCATATACCCAACATGTATTTGTACACTATTAGGAATTTT  
>HPV59\_Alpha\_557236\_nt3821\_Genome\_Tile\_rc|1  
TATTGGCTTGTGTTACATTTGCATAACAACCATTTACACACTCATATACCCAACATGTATT  
>HPV59\_Alpha\_557236\_nt3981\_Genome\_Tile\_rc|1  
AGGTGATAACCACAATATACACAAATACTAGTAACCATGTATATGCACACATATAGACAG  
>HPV59\_Alpha\_557236\_nt4001\_Genome\_Tile\_rc|1  
TAAAAAACACTCATATGAGGAGGTGATAACCACAATATACACAAATACTAGTAACCATGT  
>HPV59\_Alpha\_557236\_nt4021\_Genome\_Tile\_rc|1  
ATAAAAAACAATATATATAGTAAAAAACACTCATATGAGGAGGTGATAACCACAATATAC  
>HPV59\_Alpha\_557236\_nt4041\_Genome\_Tile\_rc|1  
ATAGTAGTAACAGTGGAATTATAAAAAACAATATATATAGTAAAAAACACTCATATGAGG  
>HPV59\_Alpha\_557236\_nt4061\_Genome\_Tile\_rc|1  
GGACAGTATTGCATGGGCATATAGTAGTAACAGTGGAATTATAAAAAACAATATATATAG  
>HPV59\_Alpha\_557236\_nt4081\_Genome\_Tile\_rc|1  
ATATACAGCAATTATTGTATGGACAGTATTGCATGGGCATATAGTAGTAACAGTGGAATT  
>HPV59\_Alpha\_557236\_nt4101\_Genome\_Tile\_rc|1  
ACAGTGCAATGTAATTTACAATATACAGCAATTATTGTATGGACAGTATTGCATGGGCAT  
>HPV59\_Alpha\_557236\_nt4121\_Genome\_Tile\_rc|1  
TTTAAATATACTGTACAATACAGTGCAATGTAATTTACAATATACAGCAATTATTGTAT  
>HPV59\_Alpha\_557236\_nt4421\_Genome\_Tile\_rc|1  
CATCTACTATAGTGTGTTGTACGCCCCCTAAAGGTATGTACCCTGTTCTGCCACCGGTAC  
>HPV59\_Alpha\_557236\_nt4441\_Genome\_Tile\_rc|1  
TGGTGGTTTAGCAGGCGATACATCTACTATAGTGTGTTGTACGCCCCCTAAAGGTATGTA  
>HPV59\_Alpha\_557236\_nt4601\_Genome\_Tile\_rc|1  
TTATATCCAAAACAGCTGGTGTGTTGTACTAGAGGTAGATATTTCAAATCCTGAAGTAC  
>HPV59\_Alpha\_557236\_nt4621\_Genome\_Tile\_rc|1  
TTGAACAGAAGAGGTTGGGGTTATATCCAAAACAGCTGGTGTGTTGTACTAGAGGTAGA  
>HPV59\_Alpha\_557236\_nt4641\_Genome\_Tile\_rc|1  
ATAAACTAGAGCTACTAATTTGAACAGAAGAGGTTGGGGTTATATCCAAAACAGCTGGT  
>HPV59\_Alpha\_557236\_nt4921\_Genome\_Tile\_rc|1  
ATATGTAACAAATGTGGATGGACGTGTTAAAAAGTCAGCGTTAGACACCCGAACCTGTTG  
>HPV59\_Alpha\_557236\_nt4981\_Genome\_Tile\_rc|1  
AACCTCTGATGAGGGGTCAAAGTTAATGTAGTATCAATTGGATCATAAGCAGGGTTATC  
>HPV59\_Alpha\_557236\_nt5221\_Genome\_Tile\_rc|1  
ATATATATCATATATATCATCAGTAGCAGCCTGGGAAGAAACAAGAGGTTGCAATTCAAT  
>HPV59\_Alpha\_557236\_nt5241\_Genome\_Tile\_rc|1  
GCTTCATCTGTAATATCTGCATATATATCATATATATCATCAGTAGCAGCCTGGGAAGAA  
>HPV59\_Alpha\_557236\_nt5281\_Genome\_Tile\_rc|1  
TTTAGGAATTGTAAATGCAGTGTGGCAGTACTAGTAGGTGCTTCATCTGTAATATCTGC  
>HPV59\_Alpha\_557236\_nt5321\_Genome\_Tile\_rc|1  
TAGATGCCGACCGTGTAAATGACAACTTTGAAAAGAAGATTTAGGAATTGTAAATGCAG  
>HPV59\_Alpha\_557236\_nt5341\_Genome\_Tile\_rc|1  
AGTTACATTTGAAAAGGTGCTAGATGCCGACCGTGTAAATGACAACTTTGAAAAGAAGA  
>HPV59\_Alpha\_557236\_nt5421\_Genome\_Tile\_rc|1  
GGTTCAACAATATTAGTATTAGGTAAAACTATATCGGGTCCTGTATTTACAGGAACATCC

>HPV59\_Alpha\_557236\_nt5441\_Genome\_Tile\_rc|1  
AGGGTGTAGTAGAATAAGTGGGTTCACAATATTAGTATTAGGTAAACTATATATCGGGTC  
>HPV59\_Alpha\_557236\_nt5461\_Genome\_Tile\_rc|1  
AATAGACTGTATGGTGGTAAAGGGTGTAGTAGAATAAGTGGGTTCACAATATTAGTATT  
>HPV59\_Alpha\_557236\_nt5481\_Genome\_Tile\_rc|1  
TAATTTGTGCCTTCTATATTAATAGACTGTATGGTGGTAAAGGGTGTAGTAGAATAAGTG  
>HPV59\_Alpha\_557236\_nt5501\_Genome\_Tile\_rc|1  
AATATATAGGCCATAAAAAATAATTTGTGCCTTCTATATTAATAGACTGTATGGTGGTAA  
>HPV59\_Alpha\_557236\_nt7081\_Genome\_Tile\_rc|1  
AAACAACACTATTTTCTGGAAGACTTGCGACGCTTAACACGTTTTTGGTGATGGGGTAGAG  
>HPV59\_Alpha\_557236\_nt7161\_Genome\_Tile\_rc|1  
AACAAACATGTACATATACACAACATACAAACAGGCAAACAATACAAAACATACAACATG  
>HPV59\_Alpha\_557236\_nt7301\_Genome\_Tile\_rc|1  
GTAGGGCAATGTGTAATAATGTGTAATAAGGACAAAGAAACAATAAAGGGACAGTACCTT  
>HPV59\_Alpha\_557236\_nt7321\_Genome\_Tile\_rc|1  
GAACAAACACACCTATGTAAGTAGGGCAATGTGTAATAATGTGTAATAAGGACAAAGAAA  
>HPV59\_Alpha\_557236\_nt7341\_Genome\_Tile\_rc|1  
ACATTTCAGGACAAAATGAAGGAACAAACACACCTATGTAAGTAGGGCAATGTGTAATAAT  
>HPV59\_Alpha\_557236\_nt7361\_Genome\_Tile\_rc|1  
ATGTGCAAATGCAAACTGGACATTTCAGGACAAAATGAAGGAACAAACACACCTATGTAA  
>HPV59\_Alpha\_557236\_nt7401\_Genome\_Tile\_rc|1  
GCAAAATGGAGGATTTAAAGGATAAAATGGACGCCATATAATGTGCAAATGCAAACTGG  
>HPV59\_Alpha\_557236\_nt7501\_Genome\_Tile\_rc|1  
GGAGGAAACAAGATGGGGATTAAGTGTTTTGCTGATGTTTAAACAGATTAATTGTTCAAA  
>HPV59\_Alpha\_557236\_nt7521\_Genome\_Tile\_rc|1  
GTTAGTAGTCTAGGCGTGTAGGAGGAAACAAGATGGGGATTAAGTGTTTTGCTGATGTTT  
>HPV59\_Alpha\_557236\_nt7541\_Genome\_Tile\_rc|1  
ATTTGGCGTTTGTAAAGTTGTGTTAGTAGTCTAGGCGTGTAGGAGGAAACAAGATGGGGAT  
>HPV59\_Alpha\_557236\_nt7701\_Genome\_Tile\_rc|1  
GACACATTCTTGATTGCACAGTAGTTTTGCAAGCCAATTATGCAATTAAAGTAGTAAAA  
>HPV59\_Alpha\_557236\_nt7721\_Genome\_Tile\_rc|1  
GTTTTTTTACAATAAATTATAGACACATTCTTGATTGCACAGTAGTTTTGCAAGCCAATT  
>HPV59\_Alpha\_557236\_nt7761\_Genome\_Tile\_rc|1  
CCTTTTTTCGGTTGCTTAACAATGACAAAAACCTTAGTCATGTTTTTTACAATAAATTATA  
>HPV59\_Alpha\_557236\_nt7781\_Genome\_Tile\_rc|1  
GTGTGCATGTACTTGCCCCGACCTTTTTTCGGTTGCTTAACAATGACAAAAACCTTAGTCAT  
>HPV59\_Alpha\_557236\_nt7821\_Genome\_Tile\_rc|1  
CTTTTTTTATTAATGATTGTAAAAAGTAATAAGTAGAAAGTGTGCATGTACTTGCCCCGA  
>HPV56\_Alpha\_397053\_nt0201\_Genome\_Tile\_rc|1  
TAATTCAGTGCATGCAAAATTATATACCTCAGCACGTGTTAGTTCTTTTTTGCAATATAC  
>HPV56\_Alpha\_397053\_nt0221\_Genome\_Tile\_rc|1  
TCATCCCTATACACTAATTTTAATTCAGTGCATGCAAAATTATATACCTCAGCACGTGTT  
>HPV56\_Alpha\_397053\_nt0241\_Genome\_Tile\_rc|1  
TGCACACTGCATAAGGAAAATCATCCCTATACACTAATTTTAATTCAGTGCATGCAAAAT  
>HPV56\_Alpha\_397053\_nt1041\_Genome\_Tile\_rc|1  
CAATTGTTGACTGTTTCTGCGTCTGCCTGTATATTTTGTATATATGAATCGTCTATAAAT  
>HPV56\_Alpha\_397053\_nt1281\_Genome\_Tile\_rc|1  
ATTTTGTGTATTCCCGCACCCACGTCCCTGTACCTCTTCATCTACCTGTTCTGGTGTTC  
>HPV56\_Alpha\_397053\_nt1341\_Genome\_Tile\_rc|1  
ATCCATATGTATTACAGAGTCTCACTATTGTTACTATAGGTACTGTTTTGTGAGCCTCC  
>HPV56\_Alpha\_397053\_nt1361\_Genome\_Tile\_rc|1  
GTTTCATTGTTTCTATCAATATCCATATGTATTACAGAGTCTCACTATTGTTACTATAG  
>HPV56\_Alpha\_397053\_nt2401\_Genome\_Tile\_rc|1  
AATAATCGTCTATATATTTCCAACATATTTCTGTTGCATCATCCAACAACCCAAGTTTAG  
>HPV56\_Alpha\_397053\_nt3161\_Genome\_Tile\_rc|1

ATATATACCTCTATAGTCTACCCCAGAACACACTTTTTTGCCACCCACAATCTCCATTGTA  
>HPV56\_Alpha\_397053\_nt3541\_Genome\_Tile\_rc|1  
TTGTTGTTGTTGATACTTCTACTTCTACTGTCGGTATTGTCTGTGTCGCTGATGTGTGTG  
>HPV56\_Alpha\_397053\_nt3561\_Genome\_Tile\_rc|1  
TAGTCTTATCACCAGGGTGGTTGTTGTTGTTGATACTTCTACTTCTACTGTCGGTATTGT  
>HPV56\_Alpha\_397053\_nt3741\_Genome\_Tile\_rc|1  
AAAAGCTGTTTCGTTGTGTTTCATCCTTATATATAATTGTAATTATGCTATAATTTTTAT  
>HPV56\_Alpha\_397053\_nt3781\_Genome\_Tile\_rc|1  
CAAACCTAACCTGTACACTACTGGAATTTTTACATGACTTAAAAAGCTGTTTCGTTGTGTT  
>HPV56\_Alpha\_397053\_nt4101\_Genome\_Tile\_rc|1  
ACACAGCACAGGACAGTAAAAAATATCAAAAATATTATAAATGTATTAAAAAAGGATGT  
>HPV56\_Alpha\_397053\_nt4661\_Genome\_Tile\_rc|1  
CAGGGGGATCAATAAATAACGGATTGGTTATATGGGTACTACTGACATGTACAGTACTAG  
>HPV56\_Alpha\_397053\_nt6061\_Genome\_Tile\_rc|1  
TTACACACAGCACCTTTAGTCCAATGTTCACCCATAGCGGGAGTACATCCAACAATACAC  
>HPV56\_Alpha\_397053\_nt6081\_Genome\_Tile\_rc|1  
CTGTGGTAACCTGTGTGGACTTACACACAGCACCTTTAGTCCAATGTTCACCCATAGCGG  
>HPV56\_Alpha\_397053\_nt6381\_Genome\_Tile\_rc|1  
TACCATTGCTACCCTTTAAATATAACTCTGCAGGTATTGTTTCCCCAACTTTACCAGCCC  
>HPV56\_Alpha\_397053\_nt6801\_Genome\_Tile\_rc|1  
TGCTTCTAACATATCTATATTTATCTTCTAGGCTGGTGGCCACTGGCGGGGATAACCCAA  
>HPV56\_Alpha\_397053\_nt7001\_Genome\_Tile\_rc|1  
GGTAGGAGCAGATCGCTTTTTTAGAGGTAGCTACAGCAGGCTTTGACCTAGTGCCCAGTTG  
>HPV56\_Alpha\_397053\_nt7041\_Genome\_Tile\_rc|1  
CACACTACCGCCTTTTACGTTTTGCTGGTGTAGAGGTGGAGGTAGGAGCAGATCGCTTTT  
>HPV56\_Alpha\_397053\_nt7161\_Genome\_Tile\_rc|1  
AAACATTTACACAAACATTTACACAAACACAACATACACATACAAAGTATAAAATAAAG  
>HPV56\_Alpha\_397053\_nt7321\_Genome\_Tile\_rc|1  
ATACACATAGTACACTGTACACAATAACTTACAAAACAAAAGCCACAATAATGACACACC  
>HPV56\_Alpha\_397053\_nt7381\_Genome\_Tile\_rc|1  
GTACAAAATGGCGGAAAAACAACAAAATGGAGTATGTTATGGTATATATATGTATGCACA  
>HPV56\_Alpha\_397053\_nt7461\_Genome\_Tile\_rc|1  
ATAATGGCACTAGGCCATGCAACCGAATTCCTTTTAGTTTAAATAATGGCACTAGGCCAT  
>HPV56\_Alpha\_397053\_nt7481\_Genome\_Tile\_rc|1  
AAAAGGGCCTTTTGGTTTAAATAATGGCACTAGGCCATGCAACCGAATTCCTTTTAGTTT  
>HPV56\_Alpha\_397053\_nt7581\_Genome\_Tile\_rc|1  
AGTCATAGTACCTGTGAGTAATACAGGGTGCGGTACTGTACATAATTCAAGTATAAAACA  
>HPV56\_Alpha\_397053\_nt7741\_Genome\_Tile\_rc|1  
AAAAAATGAGTAATTGTATGTTACATGTTTGCAAAACAGATACTGACAGATACTTGGCCT  
>HPV52\_Alpha\_397038\_nt0061\_Genome\_Tile\_rc|1  
TTGCTGGATCCTCAAACATGGCCGTGCGTTAGCTACACTGTGTTCTATATATATACACCG  
>HPV52\_Alpha\_397038\_nt0201\_Genome\_Tile\_rc|1  
TACTATTTCGTAAATCTGTAAATAGAACTTGTATACCTCTCTTCGTTGTAGCTCTTTTTT  
>HPV52\_Alpha\_397038\_nt0221\_Genome\_Tile\_rc|1  
TATGGATTATTGTCTCTATATACTATTTCGTAAATCTGTAAATAGAACTTGTATACCTCT  
>HPV52\_Alpha\_397038\_nt0241\_Genome\_Tile\_rc|1  
GGCACATAATACACACGCCATATGGATTATTGTCTCTATATACTATTTCGTAAATCTGTAA  
>HPV52\_Alpha\_397038\_nt0261\_Genome\_Tile\_rc|1  
TATCTTAGATAAAAAGCGTAGGCACATAATACACACGCCATATGGATTATTGTCTCTATA  
>HPV52\_Alpha\_397038\_nt0301\_Genome\_Tile\_rc|1  
TTTTCCCATACAGTGAATATTGATAATGCCATATTCACTTATCTTAGATAAAAAGCGTA  
>HPV52\_Alpha\_397038\_nt0321\_Genome\_Tile\_rc|1  
TTTTACCCTCTCTTCTAATGTTTTCCCATACAGTGAATATTGATAATGCCATATTCACT  
>HPV52\_Alpha\_397038\_nt0341\_Genome\_Tile\_rc|1  
GTTATTTCACTTAATGGTTTTTTTTACCCTCTCTTCTAATGTTTTCCCATACAGTGAATAT



>HPV52\_Alpha\_397038\_nt0381\_Genome\_Tile\_rc|1  
TTCAGGACATAATGGCGTTTGCACAAATTATACATCTAATAGTTATTTCACTTAATGGTTT  
>HPV52\_Alpha\_397038\_nt0421\_Genome\_Tile\_rc|1  
TATGAAATCGCTTGTTCGATTAAACATGTCTTTCTTTTCTTCAGGACATAATGGCGTTT  
>HPV52\_Alpha\_397038\_nt0521\_Genome\_Tile\_rc|1  
CTTTTATAGTTGCTTTGTCTCCACGCATGACGTTACACTTGGGTCACAGGTCGGGGTCTC  
>HPV52\_Alpha\_397038\_nt0701\_Genome\_Tile\_rc|1  
ATAGCCGTAGTGTGCTATCACAACCTGTGACAATATGTCACAATGTAGTAATTGCTTGTGG  
>HPV52\_Alpha\_397038\_nt0721\_Genome\_Tile\_rc|1  
CGTCGCAGTGCTATGAATGCATAGCCGTAGTGTGCTATCACAACCTGTGACAATATGTCAC  
>HPV52\_Alpha\_397038\_nt0741\_Genome\_Tile\_rc|1  
TGCTGTAGAGTACGAAGGTCCGTGCGAGTGCTATGAATGCATAGCCGTAGTGTGCTATCA  
>HPV52\_Alpha\_397038\_nt1121\_Genome\_Tile\_rc|1  
CTACCATGTTTTCTACACCATCTTGCCAGCACTTTCCGGACTGCTTGTAACCTTTTCGT  
>HPV52\_Alpha\_397038\_nt1141\_Genome\_Tile\_rc|1  
AAATGTGTTTTGCACGCGGACTACCATGTTTTCTACACCATCTTGCCAGCACTTTCCG  
>HPV52\_Alpha\_397038\_nt1161\_Genome\_Tile\_rc|1  
AACACACTCTGTATTTACACAAATGTGTTTTGCACGCGGACTACCATGTTTTCTACACC  
>HPV52\_Alpha\_397038\_nt1181\_Genome\_Tile\_rc|1  
CATGGTTTGCCTTTTGGTAAACACACTCTGTATTTACACAAATGTGTTTTGCACGCGGA  
>HPV52\_Alpha\_397038\_nt1321\_Genome\_Tile\_rc|1  
AACTTACATCTGAATTACTAGCCCCCACCCTTGATTGACTACTGTTACTTTGCCAGT  
>HPV52\_Alpha\_397038\_nt1341\_Genome\_Tile\_rc|1  
ATTGTCTCTATACTAGTACAACCTTACATCTGAATTACTAGCCCCCACCCTTGATTG  
>HPV52\_Alpha\_397038\_nt1361\_Genome\_Tile\_rc|1  
GTTCTATTACTATTTTCCTCATTGTCTCTATACTAGTACAACCTTACATCTGAATTACTA  
>HPV52\_Alpha\_397038\_nt1381\_Genome\_Tile\_rc|1  
TATTTTGTATGCTTTTTAGCGTTCTATTACTATTTTCCTCATTGTCTCTATACTAGTAC  
>HPV52\_Alpha\_397038\_nt1401\_Genome\_Tile\_rc|1  
TATGCTATTTTCGCACATAATATTTTGTATGCTTTTTAGCGTTCTATTACTATTTTCCTC  
>HPV52\_Alpha\_397038\_nt1421\_Genome\_Tile\_rc|1  
TTAAATAATACAGTTGTTTTATGCTATTTTCGCACATAATATTTTGTATGCTTTTTAGC  
>HPV52\_Alpha\_397038\_nt1441\_Genome\_Tile\_rc|1  
CACCATATGTTTCTTTAAATTTAAATAATACAGTTGTTTTATGCTATTTTCGCACATAA  
>HPV52\_Alpha\_397038\_nt1461\_Genome\_Tile\_rc|1  
TACTAATTCCATAAAGCTAACACCATATGTTTCTTTAAATTTAAATAATACAGTTGTTTT  
>HPV52\_Alpha\_397038\_nt1561\_Genome\_Tile\_rc|1  
GCTGTATTAATACTTTTAATCCTTCTGCAACTGATGGTGTTACTCCCATTCCTATAATAC  
>HPV52\_Alpha\_397038\_nt2561\_Genome\_Tile\_rc|1  
TTTTTGAAATGAAACACAACCAATCTACTATGTAAATATGGCCACCTAGGATCTGTTCCCT  
>HPV52\_Alpha\_397038\_nt2841\_Genome\_Tile\_rc|1  
TGAGTTATTTCCAGTTCCTTTGCTTTGTAAACAAAACACATTCCATTCGAGTCAATTTCC  
>HPV52\_Alpha\_397038\_nt2981\_Genome\_Tile\_rc|1  
CTAGACTTGTGTTGTAATGTCCATCCATCTGTGCTATATTGTGTTTTGTTTAATGCCT  
>HPV52\_Alpha\_397038\_nt3041\_Genome\_Tile\_rc|1  
GCACTGTTATTGTATACCCATGTTTTTTAAAGTATTTTTGTGGTTCTGCACGCCACATTT  
>HPV52\_Alpha\_397038\_nt3061\_Genome\_Tile\_rc|1  
GTTTTTATCATTATCGTATTGCACTGTTATTGTATACCCATGTTTTTTAAAGTATTTTTG  
>HPV52\_Alpha\_397038\_nt3101\_Genome\_Tile\_rc|1  
GTAAATAAATTTCTTCCAGTTTGTATAATCCATAGTATTGTTTTTATCATTATCGTATT  
>HPV52\_Alpha\_397038\_nt3121\_Genome\_Tile\_rc|1  
TGTACATTACACCTCACCAAGTAAATAAATTTCTTCCAGTTTGTATAATCCATAGTATT  
>HPV52\_Alpha\_397038\_nt3141\_Genome\_Tile\_rc|1  
TCTACTTGTCCTTCTACAATTGTACATTCACACTCACCAAGTAAATAAATTTCTTCCAG  
>HPV52\_Alpha\_397038\_nt3161\_Genome\_Tile\_rc|1

AATAATATAACCCATAGTAATCTACTTGTCTTCTACAATTGTACATTCACACTCACCAA  
>HPV52\_Alpha\_397038\_nt3181\_Genome\_Tile\_rc|1  
TATTTTTTCTCCATCACACCAATAATATAACCCATAGTAATCTACTTGTCTTCTACAAT  
>HPV52\_Alpha\_397038\_nt3241\_Genome\_Tile\_rc|1  
TACTTCCCATACTCCTGTTACACAATATTGCTTTGCATCGTTACTAAATTTTACAAAATA  
>HPV52\_Alpha\_397038\_nt3361\_Genome\_Tile\_rc|1  
ACCCACGGACACTGCGGAGGTCTTGGAGGTTTCGGTGCATAGGTGGACAGCAGTTTCAGT  
>HPV52\_Alpha\_397038\_nt3401\_Genome\_Tile\_rc|1  
GTCGTCGTTTCTGTGGTGGTTGTAGGTGTGTGTCTTTGGCACCCACGGACACTGCGGAGG  
>HPV52\_Alpha\_397038\_nt3481\_Genome\_Tile\_rc|1  
TGTAGTACTGTCCACGGATTGTTGTCCCCGCAAAGGTTGTTGGGGTACTTGGTGTTCCT  
>HPV52\_Alpha\_397038\_nt3541\_Genome\_Tile\_rc|1  
ACAAGTTGTATGTGCAACCCGTCCTTTGTTGTGCACTCAGTTGCAGTGACGAGTCCCCG  
>HPV52\_Alpha\_397038\_nt3581\_Genome\_Tile\_rc|1  
AACTATTAGGATCACCTTTTAGGTGTATTATAGGTGCAGTACAAGTTGTATGTGCAACCC  
>HPV52\_Alpha\_397038\_nt3801\_Genome\_Tile\_rc|1  
ATGTACAAATATCACAAATGACATGACACCTTGTATAAATTGCACAGTATTGTTATTTTA  
>HPV52\_Alpha\_397038\_nt3961\_Genome\_Tile\_rc|1  
CATACACCGATATAGTAGCAAGAGCGGCCCTAAGCACTGCACAAAACACCATAAGCAAAA  
>HPV52\_Alpha\_397038\_nt4041\_Genome\_Tile\_rc|1  
AAACAGTAGGTACAAAAAAACACTTTAAATGGTGACCCAATAGATACCCATAGCAAAAAG  
>HPV52\_Alpha\_397038\_nt4101\_Genome\_Tile\_rc|1  
TTATTGCAGTTGTGCCAAATACTGTGCATGACAGTGAATACAAAACATTGGAAAATATAA  
>HPV52\_Alpha\_397038\_nt4121\_Genome\_Tile\_rc|1  
TAGCCAATCTACATGTACAGTTATTGCAGTTGTGCCAAATACTGTGCATGACAGTGAATA  
>HPV52\_Alpha\_397038\_nt4161\_Genome\_Tile\_rc|1  
AACTACAAAAGTGAAAAAGTATATTTTGCATATATGCATGTAGCCAATCTACATGTACAG  
>HPV52\_Alpha\_397038\_nt4181\_Genome\_Tile\_rc|1  
ATAAAAGTATTTATTAGACAAACTACAAAAGTGAAAAAGTATATTTTGCATATATGCATG  
>HPV52\_Alpha\_397038\_nt4241\_Genome\_Tile\_rc|1  
AGAAGCACGTTTGTGCCGTGTAGACCGTCTGTATCTCATTGCGACAAGCTATTAAAAAAT  
>HPV52\_Alpha\_397038\_nt4481\_Genome\_Tile\_rc|1  
AGTTACAGGGGGACGAATGGTGGACGTGTAATACTACTAGTGGGAGGACGAGTGGACAA  
>HPV52\_Alpha\_397038\_nt4501\_Genome\_Tile\_rc|1  
AAGGGACCAATGGGTTCTACAGTTACAGGGGGACGAATGGTGGACGTGGTAATACTACTA  
>HPV52\_Alpha\_397038\_nt4521\_Genome\_Tile\_rc|1  
TAGAAACTATAGATGGTTCTAAGGGACCAATGGGTTCTACAGTTACAGGGGGACGAATGG  
>HPV52\_Alpha\_397038\_nt4541\_Genome\_Tile\_rc|1  
AAATGTTGTTTCTTCTATCATAGAACTATAGATGGTTCTAAGGGACCAATGGGTTCTAC  
>HPV52\_Alpha\_397038\_nt4761\_Genome\_Tile\_rc|1  
TTGGACTAGAAAACAATACATGACCAGATGCTTCTGCAGGTGCCGGGGGCTGTATTATAG  
>HPV52\_Alpha\_397038\_nt4781\_Genome\_Tile\_rc|1  
ATAGGTGTGTGTACTAATAGTTGGACTAGAAAACAATACATGACCAGATGCTTCTGCAGG  
>HPV52\_Alpha\_397038\_nt4841\_Genome\_Tile\_rc|1  
ACTACTTGTTACACTGCTGCTGTCAGTAGAGGTAACAAATGTATCCATAGGGATTTCTTC  
>HPV52\_Alpha\_397038\_nt4961\_Genome\_Tile\_rc|1  
GTTATATGTTACTAATTTCTGTGGTGATGACATAAAAGCAGGGTCGACTACCTTAACCTG  
>HPV52\_Alpha\_397038\_nt4981\_Genome\_Tile\_rc|1  
ACGCCCTCAAAAACAGGATTGTTATATGTTACTAATTTCTGTGGTGATGACATAAAAGCA  
>HPV52\_Alpha\_397038\_nt5001\_Genome\_Tile\_rc|1  
TTATAGTTTTCATCTGTATCAACGCCCTCAAAAACAGGATTGTTATATGTTACTAATTTCT  
>HPV52\_Alpha\_397038\_nt5021\_Genome\_Tile\_rc|1  
AAGTTGTGAACGATCAAAAATTATAGTTTCATCTGTATCAACGCCCTCAAAAACAGGATT  
>HPV52\_Alpha\_397038\_nt5241\_Genome\_Tile\_rc|1  
GTAATAAAGGTTGCAATTCTATGTCTTCCTGAACTTCAGCAGGCTGGATAGGACTAATAT

>HPV52\_Alpha\_397038\_nt5261\_Genome\_Tile\_rc|1  
GTAAGGGGACACAGACTGTGGTAATAAAGGTTGCAATTCTATGTCTTCTGAACTTCAGC  
>HPV52\_Alpha\_397038\_nt5281\_Genome\_Tile\_rc|1  
TACAAACCATCATTAATAGTGTAAGGGGACACAGACTGTGGTAATAAAGGTTGCAATTCT  
>HPV52\_Alpha\_397038\_nt5301\_Genome\_Tile\_rc|1  
AAGAATCTGCATACACATCATACAAACCATCATTAATAGTGTAAGGGGACACAGACTGTG  
>HPV52\_Alpha\_397038\_nt5341\_Genome\_Tile\_rc|1  
GTAGAAAGTGTGGAAGGTAAGTGAAACGTGGGTTGCTGCAAAGAATCTGCATACACATCA  
>HPV52\_Alpha\_397038\_nt5381\_Genome\_Tile\_rc|1  
AATACCACTATTAATAGGTACAGTGAAAAGTATTATTATGGGTAGAAAAGTGTGGAAGGTAA  
>HPV52\_Alpha\_397038\_nt5401\_Genome\_Tile\_rc|1  
GTGGGTTGATATACAAAGTCAATACCACTATTAATAGGTACAGTGAAAAGTATTATTATGG  
>HPV52\_Alpha\_397038\_nt5421\_Genome\_Tile\_rc|1  
GACCTGACTCAATGGACATAGTGGGTTGATATACAAAGTCAATACCACTATTAATAGGTA  
>HPV52\_Alpha\_397038\_nt5441\_Genome\_Tile\_rc|1  
CGAAGGTAATGGAATGTCAGGACCTGACTCAATGGACATAGTGGGTTGATATACAAAGTC  
>HPV52\_Alpha\_397038\_nt5461\_Genome\_Tile\_rc|1  
AAAGGAGTATGTGTGGGTAACGAAGGTAATGGAATGTCAGGACCTGACTCAATGGACATA  
>HPV52\_Alpha\_397038\_nt5501\_Genome\_Tile\_rc|1  
AATAATAGATGTAGATGGAGCTGTAGGGGCTATAGGAACAAAAGGAGTATGTGTGGGTAA  
>HPV52\_Alpha\_397038\_nt5521\_Genome\_Tile\_rc|1  
ATAAAATCTGTACCATCAACAATAATAGATGTAGATGGAGCTGTAGGGGCTATAGGAACA  
>HPV52\_Alpha\_397038\_nt5761\_Genome\_Tile\_rc|1  
CATTACCACTACTGGTGTTTTTAATAGAAAAATAGGGATGTCCTACTGTTAGTAATCGAG  
>HPV52\_Alpha\_397038\_nt5781\_Genome\_Tile\_rc|1  
GGGAACATAAACTTTTTTACCATTACCACTACTGGTGTTTTTAATAGAAAAATAGGGATG  
>HPV52\_Alpha\_397038\_nt5801\_Genome\_Tile\_rc|1  
TATTGCAGGCCAGACACCTTGGGAACATAAACTTTTTTACCATTACCACTACTGGTGTTT  
>HPV52\_Alpha\_397038\_nt6161\_Genome\_Tile\_rc|1  
AGCTGTAGGGGAGGACAATCCCCAGGATTCCTGAATTATTATTACAAGGGGTTCCCTTA  
>HPV52\_Alpha\_397038\_nt6461\_Genome\_Tile\_rc|1  
CTTTGTACAGTGGCAGTATTGCCAGAGTTAGACCCTTGTATATATAAATCACCTGGCACA  
>HPV52\_Alpha\_397038\_nt6781\_Genome\_Tile\_rc|1  
CATCCATCTTATGAATGTATGTCATAACATCAGCTGTTAATGTAATTTTGCACAATTGAA  
>HPV52\_Alpha\_397038\_nt7041\_Genome\_Tile\_rc|1  
GCGTTTTAGTTTGGGCCTAGCCTGTAGCCCTGCCTGTAACAAAACTTCCTACCTAAAGG  
>HPV52\_Alpha\_397038\_nt7081\_Genome\_Tile\_rc|1  
TTTTCTTCTTTGTGGAGGTACGTGGGGCCGATGATGCAGGGCGTTTTAGTTTGGGCCTAG  
>HPV52\_Alpha\_397038\_nt7101\_Genome\_Tile\_rc|1  
CAATGGTTACCTTTTAACCTTTTTCTTCTTTGTGGAGGTACGTGGGGCCGATGATGCAGG  
>HPV52\_Alpha\_397038\_nt7121\_Genome\_Tile\_rc|1  
ACAGACAATTACCCAACAGACAATGGTTACCTTTTAACCTTTTTCTTCTTTGTGGAGGTA  
>HPV52\_Alpha\_397038\_nt7161\_Genome\_Tile\_rc|1  
CCTTTTAACCTGTGTTTGACATACACAACACATACATGACACAGACAATTACCCAACAGA  
>HPV52\_Alpha\_397038\_nt7201\_Genome\_Tile\_rc|1  
CAGTACACACACAAAACAATTACATAACAAACAATGGTTACCTTTTAACCTGTGTTTGAC  
>HPV52\_Alpha\_397038\_nt7221\_Genome\_Tile\_rc|1  
TACATAACATGCAAACAACACAGTACACACACAAAACAATTACATAACAAACAATGGTTA  
>HPV52\_Alpha\_397038\_nt7321\_Genome\_Tile\_rc|1  
ATAAGACTACTATAAATAGTTTTAGTAAATACAGTACTTTTATTAATACATACACAAAACAT  
>HPV52\_Alpha\_397038\_nt7341\_Genome\_Tile\_rc|1  
GGGTGCAACCATAACATAACATAAGACTACTATAAATAGTTTAGTAAATACAGTACTTTA  
>HPV52\_Alpha\_397038\_nt7361\_Genome\_Tile\_rc|1  
AACTGTATTGTTACTCATGTGGGTGCAACCATAACATAACATAAGACTACTATAAATAGT  
>HPV52\_Alpha\_397038\_nt7401\_Genome\_Tile\_rc|1

GGGACACAGGGTAGGGCAGGAGATGCAATAGATTAGGAGCAACTGTATTGTTACTCATGT  
>HPV52\_Alpha\_397038\_nt7441\_Genome\_Tile\_rc|1  
TAATTAGTAGTGTAAACAAAGTAGGACACAGGGTAGGGCAGGGGACACAGGGTAGGGCAGG  
>HPV52\_Alpha\_397038\_nt7461\_Genome\_Tile\_rc|1  
CAAAATGGAGAGTATAAGGCTAATTAGTAGTGTAAACAAAGTAGGACACAGGGTAGGGCAG  
>HPV52\_Alpha\_397038\_nt7481\_Genome\_Tile\_rc|1  
GTGGATAGTACAAAATGGTACAAAATGGAGAGTATAAGGCTAATTAGTAGTGTAAACAAAG  
>HPV52\_Alpha\_397038\_nt7501\_Genome\_Tile\_rc|1  
TTCGGTTAGGATTTAAAATGGTGGATAGTACAAAATGGTACAAAATGGAGAGTATAAGGC  
>HPV52\_Alpha\_397038\_nt7621\_Genome\_Tile\_rc|1  
ACAACAAGTGTAGACCAGTGGACTGCAGGAAACCAAAGGATTAAGCAGTTTGCTGAAACT  
>HPV52\_Alpha\_397038\_nt7641\_Genome\_Tile\_rc|1  
AAGAAGTCAGTTTAGGCGGGACAACAAGTGTAGACCAGTGGACTGCAGGAAACCAAAGGA  
>HPV52\_Alpha\_397038\_nt7681\_Genome\_Tile\_rc|1  
AATGTATTGTTTAGCTGCACTGCAGGACCTGTGAGTCAGCAAGAAGTCAGTTTAGGCGGG  
>HPV52\_Alpha\_397038\_nt7781\_Genome\_Tile\_rc|1  
GGCGTAGGATGTACTTGTGTAAGCCAACTGTAAATTAGTGCATTGAAAGTTTAAATAAA  
>HPV52\_Alpha\_397038\_nt7801\_Genome\_Tile\_rc|1  
ATGTTTTACAAGACATATTTGGCGTAGGATGTACTTGTGTAAGCCAACTGTAAATTAGT  
>HPV52\_Alpha\_397038\_nt7821\_Genome\_Tile\_rc|1  
GTGAGTAACAGTATTTAATCATGTTTTACAAGACATATTTGGCGTAGGATGTACTTGTGT  
>HPV52\_Alpha\_397038\_nt7861\_Genome\_Tile\_rc|1  
TGGGTACGGTAACCGTAACCGGTGCTGTAGTGCACACCTGGTGAGTAACAGTATTTAATC  
>HPV52\_Alpha\_397038\_nt7881\_Genome\_Tile\_rc|1  
ATTATAAAAAAAGTGGTTGTGGGTACGGTAACCGTAACCGGTGCTGTAGTGCACACCTG  
>HPV45\_Alpha\_397022\_nt0161\_Genome\_Tile\_rc|1  
TCCAATGTTGCTTTGCAATATACACAGGCAATAGATACGTCTTGTAGTGATGTATTCAAT  
>HPV45\_Alpha\_397022\_nt0341\_Genome\_Tile\_rc|1  
TTATACAACCTCTGTATTAGTTATTTTTTCCAGTGTCTCTCCATATACAGAGTTTGAATAA  
>HPV45\_Alpha\_397022\_nt1421\_Genome\_Tile\_rc|1  
CTCCTTTAGTTCTGTAATACTGCAATGCGGATCTACATTTTCTGCATTGTCACACTACTATC  
>HPV45\_Alpha\_397022\_nt1441\_Genome\_Tile\_rc|1  
TTGTTACTTGCTTGTAATAGCTCCTTTAGTTCTGTAATACTGCAATGCGGATCTACATTT  
>HPV45\_Alpha\_397022\_nt3101\_Genome\_Tile\_rc|1  
TTGTTGCCATCAAAGTATACGTGCACGGTTTTTACCGCCTTTTTTAAAACACTGCGACGGT  
>HPV45\_Alpha\_397022\_nt3121\_Genome\_Tile\_rc|1  
CATAGTTCATACAGTTGTCTTGTGGCCATCAAAGTATACGTGCACGGTTTTTACCGCCTT  
>HPV45\_Alpha\_397022\_nt3201\_Genome\_Tile\_rc|1  
TACACCCCAATAGCTAACACATGCTGCTGTTTTGTCCCATATCCCTGTCTCAGTTATATA  
>HPV45\_Alpha\_397022\_nt3221\_Genome\_Tile\_rc|1  
TCTCCATCTTTTATATAATATACACCCCAATAGCTAACACATGCTGCTGTTTTGTCCCAT  
>HPV45\_Alpha\_397022\_nt3241\_Genome\_Tile\_rc|1  
ATTGTACATAATATGTGGTATCTCCATCTTTTATATAATATACACCCCAATAGCTAACAC  
>HPV45\_Alpha\_397022\_nt3261\_Genome\_Tile\_rc|1  
TTTCTCACATTCGCTTTTAAATTGTACATAATATGTGGTATCTCCATCTTTTATATAATA  
>HPV45\_Alpha\_397022\_nt3281\_Genome\_Tile\_rc|1  
CACGTATTACTATTTCCATATTTCTCACATTCGCTTTTAAATTGTACATAATATGTGGTA  
>HPV45\_Alpha\_397022\_nt3781\_Genome\_Tile\_rc|1  
TGTTAGGAATAGTAACATCCAAAAAGGTATTTCTTTGTACCTCACTATTATATGTTA  
>HPV45\_Alpha\_397022\_nt3861\_Genome\_Tile\_rc|1  
TAAAGATAGCATAGTAATGTTACATACTGTATACAATATACAGATTCATATAGTCATGTA  
>HPV45\_Alpha\_397022\_nt4001\_Genome\_Tile\_rc|1  
GCAAAATGCTGTTAATGGGGATGTAATAACAACCTATAAAAAGAAACACCAACAACCAAGCA  
>HPV45\_Alpha\_397022\_nt4021\_Genome\_Tile\_rc|1  
AATAGCAACAAATGTATACAGCAAATGCTGTTAATGGGGATGTAATAACAACCTATAAAAA

>HPV45\_Alpha\_397022\_nt4041\_Genome\_Tile\_rc|1  
TAATACAAACATAGGTAGTAAATAGCAACAAATGTATACAGCAAATGCTGTTAATGGGGA  
>HPV45\_Alpha\_397022\_nt4061\_Genome\_Tile\_rc|1  
GTGTGTAAAGCATGCATATGTAATACAAACATAGGTAGTAAATAGCAACAAATGTATACA  
>HPV45\_Alpha\_397022\_nt4081\_Genome\_Tile\_rc|1  
ATTATAGTAATTATTGTATGGTGTGTAAAGCATGCATATGTAATACAAACATAGGTAGTA  
>HPV45\_Alpha\_397022\_nt4101\_Genome\_Tile\_rc|1  
TATGTTACACTGTACTGTACATTATAGTAATTATTGTATGGTGTGTAAAGCATGCATATG  
>HPV45\_Alpha\_397022\_nt4181\_Genome\_Tile\_rc|1  
ACCATGGTTTATTAAACATATAAAAATACAAAAATACAAAAATACAAAAATACAAAAATAC  
>HPV45\_Alpha\_397022\_nt5001\_Genome\_Tile\_rc|1  
ATCGGAATCAGGAACATTACTGGTAGGCTCAAAGGATAGTGTGGTGTCCAGGGGCTCATA  
>HPV45\_Alpha\_397022\_nt5261\_Genome\_Tile\_rc|1  
CTAGGTGTAGTGGACGCAGGAGGTGGGAAGTCTGCATATACATCAAACAGGTCACTATCA  
>HPV45\_Alpha\_397022\_nt5281\_Genome\_Tile\_rc|1  
TAAATGATTTGTGTATAGTGTCTAGGTGTAGTGGACGCAGGAGGTGGGAAGTCTGCATATA  
>HPV45\_Alpha\_397022\_nt5301\_Genome\_Tile\_rc|1  
CAAGGAATACTTTGGATATGTAAATGATTTGTGTATAGTGTCTAGGTGTAGTGGACGCAGG  
>HPV45\_Alpha\_397022\_nt5341\_Genome\_Tile\_rc|1  
TAACATTACTGTAAGAGGATGCAGCAGTAGAAGGCATGGTCAAGGAATACTTTGGATATG  
>HPV45\_Alpha\_397022\_nt5381\_Genome\_Tile\_rc|1  
GTATATATAGGTACATCCCATGCAGATGTTAATGGTACTGTAACATTACTGTAAGAGGAT  
>HPV45\_Alpha\_397022\_nt5421\_Genome\_Tile\_rc|1  
CCACATAGGAGTATGGGATGGCAATATAATGTCCGGGCCAGTATATATAGGTACATCCCA  
>HPV45\_Alpha\_397022\_nt5441\_Genome\_Tile\_rc|1  
TTGGTAGGAGATGTACTAGGCCACATAGGAGTATGGGATGGCAATATAATGTCCGGGCCA  
>HPV45\_Alpha\_397022\_nt5461\_Genome\_Tile\_rc|1  
TATAGGTGGTGGTGGGAAGCATTGGTAGGAGATGTACTAGGCCACATAGGAGTATGGGATG  
>HPV45\_Alpha\_397022\_nt5481\_Genome\_Tile\_rc|1  
TTGTGTGCCATGAATACCTATATAGGTGGTGGTGGGAAGCATTGGTAGGAGATGTACTAGG  
>HPV45\_Alpha\_397022\_nt5521\_Genome\_Tile\_rc|1  
GTTTTTTTAGGAAAATAATAATACCATGGCCATAAATAATATTGTGTGCCATGAATACCTA  
>HPV45\_Alpha\_397022\_nt5761\_Genome\_Tile\_rc|1  
ATACTGATATGCGGATACCTTAGGAACAGCCTGTTTATTACCTGCACCATTAGGTACAAC  
>HPV45\_Alpha\_397022\_nt6941\_Genome\_Tile\_rc|1  
GATCCAAATCGGAGGAAAATTTTTCCTTTAGGTCAACAGTCCAAAACCTTTAATTTATCAT  
>HPV45\_Alpha\_397022\_nt7161\_Genome\_Tile\_rc|1  
ATCACACAAATACATACATACATACAACATACAAAACCATACATACAAAACATACATATAT  
>HPV45\_Alpha\_397022\_nt7181\_Genome\_Tile\_rc|1  
CAAACAAAATACAGTAATATATCACACAAATACATACATACATACAACATACAAAACCAT  
>HPV45\_Alpha\_397022\_nt7241\_Genome\_Tile\_rc|1  
AATTATGTACAGTAACACCATACATGCCACAAGGCACATTTCATACATACACGCACGCAAA  
>HPV45\_Alpha\_397022\_nt7281\_Genome\_Tile\_rc|1  
ACCCTACACAACACTATTAGCATACTTTATTTAATACCACAATTATGTACAGTAACACCA  
>HPV45\_Alpha\_397022\_nt7301\_Genome\_Tile\_rc|1  
TTGTTACTCACAAGGGTGAACCCTACACAACACTATTAGCATACTTTATTTAATACCAC  
>HPV45\_Alpha\_397022\_nt7341\_Genome\_Tile\_rc|1  
AATATAGGGTACAAAGCAATACACATACACACAAATAGTATTGTACTCACAAGGGTGCA  
>HPV45\_Alpha\_397022\_nt7361\_Genome\_Tile\_rc|1  
TAAGTTGAAATACAGGAAAGAATATAGGGTACAAAGCAATACACATACACACAAATAGTA  
>HPV45\_Alpha\_397022\_nt7481\_Genome\_Tile\_rc|1  
ATGTGCCAGTTTAGGTATTATGTTTAAAAGGTCACATATAAGCCACAGGCAACCGAAATC  
>HPV45\_Alpha\_397022\_nt7501\_Genome\_Tile\_rc|1  
AAACTATGTAGGGGTTGTAAATGTGCCAGTTTAGGTATTATGTTTAAAAGGTCACATATA  
>HPV45\_Alpha\_397022\_nt7741\_Genome\_Tile\_rc|1

TAAGTGAGTCAGTTTATAGTTTATGTAACAAGTAGACAGATTGTTGGATAAGAAAGTGGT  
>HPV40\_Alpha\_397014\_nt0181\_Genome\_Tile\_rc|1  
AGGCAAAGGCCAGTACCTCAGCTGTTTTTAGGACCGTCTTGCAAAACACACAATCAATTT  
>HPV40\_Alpha\_397014\_nt0301\_Genome\_Tile\_rc|1  
TTGGTGCATAGGCTGCGTATCTAAAGTTTCTGTATTGGTTTACTTTTCCGTGCAGGTCCA  
>HPV40\_Alpha\_397014\_nt0721\_Genome\_Tile\_rc|1  
GAACAATGCACTGCTAAGCGCACCAAACACTGACAAAATACACACCGAGTTACTACTTTA  
>HPV40\_Alpha\_397014\_nt0741\_Genome\_Tile\_rc|1  
ACTGTGTTATATCAGTGATGGAACAATGCACTGCTAAGCGCACCAAACACTGACAAAATA  
>HPV40\_Alpha\_397014\_nt0921\_Genome\_Tile\_rc|1  
TCATCCTCATCTTCCGATACAGCATCCCCCGTTTGTATTCCACTACAGCTTCTACTACA  
>HPV40\_Alpha\_397014\_nt1001\_Genome\_Tile\_rc|1  
TTAGTTCTACATGTTTCCTCTGCCACAACACTATTATCAATAAAATCTATCATATCAAATC  
>HPV40\_Alpha\_397014\_nt1341\_Genome\_Tile\_rc|1  
ACCTCTACTGCTTCCGCCTCATCTGTGGTCACCCCTCCACTACCCCCACGGTATCTTCC  
>HPV40\_Alpha\_397014\_nt1401\_Genome\_Tile\_rc|1  
AGCTCTATTAGTTGTGTGCGCGGACTACAGTGGTCTATAACATGACTGCCGTCTTCCACA  
>HPV40\_Alpha\_397014\_nt1481\_Genome\_Tile\_rc|1  
TTACCAGGTCTCCAAACCCCACTCCATAAAGCTCTTTAACTTACCATACAGCTTAGCAT  
>HPV40\_Alpha\_397014\_nt1581\_Genome\_Tile\_rc|1  
CTTTTCAGCAGTGTATGAAAGCCCTCGGCTATGGTGGGATTAACCCCGAACACAGCATAC  
>HPV40\_Alpha\_397014\_nt1621\_Genome\_Tile\_rc|1  
TTTGCATGACGTCCATTGGGTATGTAAATATAATGCCTGCCTTTTCAGCAGTGTATGAAA  
>HPV40\_Alpha\_397014\_nt1741\_Genome\_Tile\_rc|1  
AGGCGGTTGTACCAGTATCTGGTTGTCAGGTACATTTAACATTTTGGATAGCTGTCTAAC  
>HPV40\_Alpha\_397014\_nt2521\_Genome\_Tile\_rc|1  
TGTTATATTTATATTGGACGTTAACAGTAACGGAGGGCACTTAATTACTGCTAACGGTTT  
>HPV40\_Alpha\_397014\_nt2561\_Genome\_Tile\_rc|1  
CTTGAACCTACTTTGTAAATATTGGTACTTACTGTCCTGTGTTATATTTATATTGGACG  
>HPV40\_Alpha\_397014\_nt3321\_Genome\_Tile\_rc|1  
CAGTCTCAACAATGGGTAGTCCGTGTTCTCGATAGTACTAGGAGAACATATAACGTGTG  
>HPV40\_Alpha\_397014\_nt3341\_Genome\_Tile\_rc|1  
GGTCGGGGGTCTGGCGTCAGCAGTCTCAACAATGGGTAGTCCGTGTTCTCGATAGTACT  
>HPV40\_Alpha\_397014\_nt3481\_Genome\_Tile\_rc|1  
TACTCTCCTCCGAGTGATTTGCCACAGTAGTGGTGATGGGCAGGTGTCCGTTTCTTCGT  
>HPV40\_Alpha\_397014\_nt3501\_Genome\_Tile\_rc|1  
TTCTGTCTGCAGTGTCCACGTACTCTCTCCGAGTGATTTGCCACAGTAGTGGTGATGG  
>HPV40\_Alpha\_397014\_nt3661\_Genome\_Tile\_rc|1  
CATGTAGTTGAGGAATTACAAAATAAATGTGACACTTTTCCTAGTCTATATCTAAACAC  
>HPV40\_Alpha\_397014\_nt3681\_Genome\_Tile\_rc|1  
TGGATTCACTGGTCCACCTCCATGTAGTTGAGGAATTACAAAATAAATGTGACACTTTTC  
>HPV40\_Alpha\_397014\_nt3801\_Genome\_Tile\_rc|1  
TCAGTGTTAACATACCCAAGCTATGTTTTATTGTTTTTGGTATTTTTACAATAGCTAAGA  
>HPV40\_Alpha\_397014\_nt3821\_Genome\_Tile\_rc|1  
ACATATATACATATATTACATCAGTGTTAACATACCCAAGCTATGTTTTATTGTTTTTGG  
>HPV40\_Alpha\_397014\_nt3861\_Genome\_Tile\_rc|1  
TGCTAGACAATACCCTTCACAGATGGTGTTCATATATATACATATATACATATATTACA  
>HPV40\_Alpha\_397014\_nt3961\_Genome\_Tile\_rc|1  
TCAACAGTGCAATAAGTAAAAAACAATATAGACTACTAGTATGCCAAGCGTAGACTCTA  
>HPV40\_Alpha\_397014\_nt3981\_Genome\_Tile\_rc|1  
ATTAGGGACACACACAGATCAACAGTGCAATAAGTAAAAAACAATATAGACTACTAG  
>HPV40\_Alpha\_397014\_nt4001\_Genome\_Tile\_rc|1  
ATAGAGCTCCACACATACAGATTAGGGACACACACAGATCAACAGTGCAATAAGTAAA  
>HPV40\_Alpha\_397014\_nt4021\_Genome\_Tile\_rc|1  
AAATGGAGATAGCAGACAGTATAGAGCTCCACACATACAGATTAGGGACACACACACAGA

>HPV40\_Alpha\_397014\_nt4041\_Genome\_Tile\_rc|1  
ACCCCATGTTACAAAGCACAAAATGGAGATAGCAGACAGTATAGAGCTCCACACATACAG  
>HPV40\_Alpha\_397014\_nt4061\_Genome\_Tile\_rc|1  
TTAGTAATAGATGTTAGTGCACCCCATGTTACAAAGCACAAAATGGAGATAGCAGACAGT  
>HPV40\_Alpha\_397014\_nt4081\_Genome\_Tile\_rc|1  
AGAGTATTAGGATAAACAGGTTAGTAATAGATGTTAGTGCACCCCATGTTACAAAGCACA  
>HPV40\_Alpha\_397014\_nt4121\_Genome\_Tile\_rc|1  
ATAAATGTGTGAAGGACCACCGCAGGCAAATACCACACTAAGAGTATTAGGATAAACAGG  
>HPV40\_Alpha\_397014\_nt4141\_Genome\_Tile\_rc|1  
GGTTCTGTATGTGATATATAATAAATGTGTGAAGGACCACCGCAGGCAAATACCACACTA  
>HPV40\_Alpha\_397014\_nt4161\_Genome\_Tile\_rc|1  
CAGGTCAACATGTTACAATTGGTTCTGTATGTGATATATAATAAATGTGTGAAGGACCAC  
>HPV40\_Alpha\_397014\_nt4321\_Genome\_Tile\_rc|1  
GCTGTAATATAAAAAAATGTTTATTTACTACACAAAGTATTACTTGGTATACCTATATAA  
>HPV40\_Alpha\_397014\_nt4741\_Genome\_Tile\_rc|1  
AGGACGTTACTGAAAACCCACCCTCTGTTGGAATAGTAAGGGACGGGGCACCTGACTGAA  
>HPV40\_Alpha\_397014\_nt4841\_Genome\_Tile\_rc|1  
ACCGAGGGATCAGTAAAGACAGGATTGTGATGTGTGGTGGCTGTACATGCACGGTATTT  
>HPV40\_Alpha\_397014\_nt5021\_Genome\_Tile\_rc|1  
GCCTTACTGTACAGTCCCAACCTGGGCCGTCCAGACGTACCAGGAACGGGTGTACTGGAC  
>HPV40\_Alpha\_397014\_nt5421\_Genome\_Tile\_rc|1  
CAGGGCATCAGTAGTGTCCAGTGGTGTCTCTAGTGTATGTGGTGTCTCCAGTGTATGTGG  
>HPV40\_Alpha\_397014\_nt5461\_Genome\_Tile\_rc|1  
CATCATCATCTATAGTATCCATGTCTGCATACACATCAAACAGGGCATCAGTAGTGTCCA  
>HPV40\_Alpha\_397014\_nt5481\_Genome\_Tile\_rc|1  
TGAGAATGTAGCATATGCTGCATCATCATCTATAGTATCCATGTCTGCATACACATCAA  
>HPV40\_Alpha\_397014\_nt5541\_Genome\_Tile\_rc|1  
AGAAACCGTGGCAAGAGGTATGGATGTGTTAGATATACGAGTAGAATCGGCAGGATGTAA  
>HPV40\_Alpha\_397014\_nt5901\_Genome\_Tile\_rc|1  
GGCACTGAAATGTCACCATTGGGTTTTTTTAACTCAAAGTATGGATGTCCTATAGTCAGT  
>HPV40\_Alpha\_397014\_nt6141\_Genome\_Tile\_rc|1  
CTATCCTGCCCCGACCTGTGCCATAGGCAGATGAGTTTTCCACATCCTCATCCTTATTA  
>HPV40\_Alpha\_397014\_nt6301\_Genome\_Tile\_rc|1  
CTGAATAACCTCAGTTTTTTAATTCTAATACAGGACAGTCCCCAAGGGTTACCCGAGAAGC  
>HPV40\_Alpha\_397014\_nt6821\_Genome\_Tile\_rc|1  
CCTCCCCATGACGCAAATATTCCTTGAAATTACTGTTATTATATGGGGTTGGTGTGGGGG  
>HPV40\_Alpha\_397014\_nt6961\_Genome\_Tile\_rc|1  
CTCTAAGGATGCAGAGGCTGGAGGAGCAATTTTAAAGTTCCAATCCTCCAACAACGTAGG  
>HPV40\_Alpha\_397014\_nt7361\_Genome\_Tile\_rc|1  
ACCATACGGACACATACACAACAAACACAAAACATACACAACAATACATACATATTC  
>HPV40\_Alpha\_397014\_nt7421\_Genome\_Tile\_rc|1  
GCTTTATTAAACACACAACCAACGTTAGGTATACAGCATACAAACAATACATACACAGT  
>HPV40\_Alpha\_397014\_nt7521\_Genome\_Tile\_rc|1  
GTCGCGCAGTACAAAATGGAGGATTTAGACACAAAAGTACATGGTCAACACTGAACAAG  
>HPV40\_Alpha\_397014\_nt7781\_Genome\_Tile\_rc|1  
GTACTATGTTAACCACAAGTGTATGTTTGGCCAAAAGTCTATTAGCTAACTTTTTTATT  
>HPV3\_Alpha\_397005\_nt0081\_Genome\_Tile\_rc|1  
TTTTGGGCAGTTTGCATCCATAGACATGGCTACTGCCATGCATTATGTGCCTCCTTTTAT  
>HPV3\_Alpha\_397005\_nt1481\_Genome\_Tile\_rc|1  
ATCGCTACATACTGTTTTGTTACTTTTAAAGTGTCTAATCAGTTCATTAAATCCTAACCC  
>HPV3\_Alpha\_397005\_nt1561\_Genome\_Tile\_rc|1  
GCATATTCGCACTGTGGTTGTATTAGCGTCTTAAAGCTTTCTGCCAATGTACAGTATACA  
>HPV3\_Alpha\_397005\_nt2121\_Genome\_Tile\_rc|1  
GGTACCTTAAATACTGTACTATTGGTTTCCAATCGCCATCCCCCTGTATTTTATCTCCTC  
>HPV3\_Alpha\_397005\_nt2161\_Genome\_Tile\_rc|1

GATTTTCAGAGCGCATAGAAATGGTATAAATTCTACGTCCTGGTACCTTAAATACTGTACT  
>HPV3\_Alpha\_397005\_nt3181\_Genome\_Tile\_rc|1  
TTACATAAAAAGTTTTCTGTCTTCGTGCATGTAATATAGACCCTCATGAGACACCAGTC  
>HPV3\_Alpha\_397005\_nt3821\_Genome\_Tile\_rc|1  
AATTATGTGAACATTGACATGTGTCCAGTATCACTTGAATACCTGGTGGCACTTTTACG  
>HPV3\_Alpha\_397005\_nt3841\_Genome\_Tile\_rc|1  
ACTGTACAATGCGGGGACACAATTATGTGAACATTGACATGTGTCCAGTATCACTTGAA  
>HPV3\_Alpha\_397005\_nt4061\_Genome\_Tile\_rc|1  
CCATTGTTGTCTGTGAGTACCAGAGGATACATAGTAAAACCTATGTGTTATTCTGTACAA  
>HPV3\_Alpha\_397005\_nt4081\_Genome\_Tile\_rc|1  
CAAACAAGACAAGATGGTCGCCATTGTTGTCTGTGAGTACCAGAGGATACATAGTAAAAC  
>HPV3\_Alpha\_397005\_nt4101\_Genome\_Tile\_rc|1  
GTACACGTCTCCAGGCTCAACAAACAAGACAAGATGGTCGCCATTGTTGTCTGTGAGTAC  
>HPV3\_Alpha\_397005\_nt4121\_Genome\_Tile\_rc|1  
AACATAAACAGCAATAATATGTACACGTCTCCAGGCTCAACAAACAAGACAAGATGGTCG  
>HPV3\_Alpha\_397005\_nt4141\_Genome\_Tile\_rc|1  
ACAATGTAAGTATGACAGCTAACATAAACAGCAATAATATGTACACGTCTCCAGGCTCAA  
>HPV3\_Alpha\_397005\_nt4161\_Genome\_Tile\_rc|1  
CAGATGTCTATACATAATAAACAAATGTAAGTATGACAGCTAACATAAACAGCAATAATAT  
>HPV3\_Alpha\_397005\_nt4181\_Genome\_Tile\_rc|1  
CTACAACCTTACAGGAGTCCAGATGTCTATACATAATAAACAAATGTAAGTATGACAGCT  
>HPV3\_Alpha\_397005\_nt4201\_Genome\_Tile\_rc|1  
TACATACAGGTGACCTGCAACTACAACCTTACAGGAGTCCAGATGTCTATACATAATAA  
>HPV3\_Alpha\_397005\_nt4221\_Genome\_Tile\_rc|1  
GCATATACATCAAGGAAGAATACATACAGGTGACCTGCAACTACAACCTTACAGGAGTCC  
>HPV3\_Alpha\_397005\_nt4281\_Genome\_Tile\_rc|1  
TATTGAACTGTAAAAAAAACATAGCAGTATAAAAGACGGTGGTACAATACCACACTAGG  
>HPV3\_Alpha\_397005\_nt4701\_Genome\_Tile\_rc|1  
TAGTTGTGGCTGAAGAAATAACTTCGAATCCATCAGTACCAGTAAAGGTCGGTATGGTGG  
>HPV3\_Alpha\_397005\_nt4821\_Genome\_Tile\_rc|1  
AAACCTCACCATTCTGAGGAACCTCCAACAGGGAAGGTTCTGTAAAAGCTGGATTGCTAA  
>HPV3\_Alpha\_397005\_nt4841\_Genome\_Tile\_rc|1  
GCTAATAAGTATGTGCCCTGAAACCTCACCATTCTGAGGAACCTCCAACAGGGAAGGTTT  
>HPV3\_Alpha\_397005\_nt4861\_Genome\_Tile\_rc|1  
TGTGTACCAGATGTGGGGGTGCTAATAAGTATGTGCCCTGAAACCTCACCATTCTGAGGA  
>HPV3\_Alpha\_397005\_nt5361\_Genome\_Tile\_rc|1  
CATACACATCATACAGAGAGTCATAGGCTGAGGCAGATGCAGGAGCAATCAAGGGTTCCA  
>HPV3\_Alpha\_397005\_nt5441\_Genome\_Tile\_rc|1  
GGACACTGTAGCACGGCCTCTAGACAGAGTGTCACTACGACCTCCAGATGTAAAACCTAT  
>HPV3\_Alpha\_397005\_nt5461\_Genome\_Tile\_rc|1  
GACAGAGTGGAGGACAGGGGGGACACTGTAGCACGGCCTCTAGACAGAGTGTCACTACGA  
>HPV3\_Alpha\_397005\_nt5901\_Genome\_Tile\_rc|1  
ATATTGAAAGGCGGACACCTTAGGAATATCCATCTTGAATTAGAAGATTTGGGGATAGC  
>HPV3\_Alpha\_397005\_nt6521\_Genome\_Tile\_rc|1  
TTAATGTACAACGCGTCAGGCACGGTGTCTCCAGCCATACCAGCTCTGTTAAGAAAATGT  
>HPV3\_Alpha\_397005\_nt6541\_Genome\_Tile\_rc|1  
CGCCGCTCTGACTGTCACCTTTAATGTACAACGCGTCAGGCACGGTGTCTCCAGCCATAC  
>HPV3\_Alpha\_397005\_nt6561\_Genome\_Tile\_rc|1  
ACTACCAATTTTATCCCGACCGCTCTGACTGTCACCTTTAATGTACAACGCGTCAGG  
>HPV3\_Alpha\_397005\_nt6781\_Genome\_Tile\_rc|1  
ACTCTTTAAATTTAGTAGCATCATATGTAGCCGAGGTTTCAGTAGAAACACACAATGTCA  
>HPV3\_Alpha\_397005\_nt7101\_Genome\_Tile\_rc|1  
GAGAAATTTCTGCCAAGGGGGAAGTGCAGAAAGATCCAGGGAAAAACGATCCTTAAGATC  
>HPV3\_Alpha\_397005\_nt7121\_Genome\_Tile\_rc|1  
GTACCTACACCGAGCTGCATGAGAAATTTCTGCCAAGGGGGAAGTGCAGAAAGATCCAGG



>HPV3\_Alpha\_397005\_nt7241\_Genome\_Tile\_rc|1  
TACACACAGGTTACACATACAAAACACAAATGTGGCTATTTTTTGGTGCCTTCCCTTTTT  
>HPV3\_Alpha\_397005\_nt7261\_Genome\_Tile\_rc|1  
CAGTACATACATAAAAAACATACACACAGGTTACACATACAAAACACAAATGTGGCTATTT  
>HPV30\_Alpha\_396973\_nt0061\_Genome\_Tile\_rc|1  
TTTCAAATTTGAAAGCCATGGGTACACTGTCCGTTTGGTACAGTGCTTTTATATGTACCG  
>HPV30\_Alpha\_396973\_nt0141\_Genome\_Tile\_rc|1  
ACACTGTAGCTGTAGCTCCAGCAACGATGTTTCTTGTACCTCACAAAGATGGTGCACAGT  
>HPV30\_Alpha\_396973\_nt0301\_Genome\_Tile\_rc|1  
ACAATGAATAGTTGTAATGTCTAATCTTTCTTACTTTACTATAAAAATAATAAACAGAAAT  
>HPV30\_Alpha\_396973\_nt0321\_Genome\_Tile\_rc|1  
TGCCACTAGGCTTGCCCCATACAATGAATAGTTGTAATGTCTAATCTTTCTTACTTTACT  
>HPV30\_Alpha\_396973\_nt0981\_Genome\_Tile\_rc|1  
GAAACCCATCTAAATCTGATGCTGTGCCCTCATCTTCTTCTGTTTCGTCCTCTGATATTA  
>HPV30\_Alpha\_396973\_nt1001\_Genome\_Tile\_rc|1  
TATTACATTACTATTGTCTAGAAACCCATCTAAATCTGATGCTGTGCCCTCATCTTCTTC  
>HPV30\_Alpha\_396973\_nt1381\_Genome\_Tile\_rc|1  
TTACTAGATTTTAATAATTCTTGTATTTGCTGTGGTGGCGTGGCGCCTATATCCATATCA  
>HPV30\_Alpha\_396973\_nt1421\_Genome\_Tile\_rc|1  
AAATAACTCTTTAAATTTATAACACAGCTTTGCCTGTACATTACTAGATTTTAATAATTC  
>HPV30\_Alpha\_396973\_nt1781\_Genome\_Tile\_rc|1  
CTCACCATATATGTCACTAATATTAGACATTGCAGTTTTGTAAAGTATAATGCAACGGC  
>HPV30\_Alpha\_396973\_nt3141\_Genome\_Tile\_rc|1  
ATATATACCTTTGTAATCTACTACAGAAGGCACCTTTAGTCCACCCATTGTCCCCACAGTA  
>HPV30\_Alpha\_396973\_nt3161\_Genome\_Tile\_rc|1  
TTGTTACCGTCATGTACATAATATATACCTTTGTAATCTACTACAGAAGGCACCTTTAGTC  
>HPV30\_Alpha\_396973\_nt3181\_Genome\_Tile\_rc|1  
TAAAGTCTGTATAATATACCTTTGTTACCGTCATGTACATAATATATACCTTTGTAATCTA  
>HPV30\_Alpha\_396973\_nt3201\_Genome\_Tile\_rc|1  
ATACTTTACTGCCTCGTCATTAAAGTCTGTATAATATACCTTTGTTACCGTCATGTACATA  
>HPV30\_Alpha\_396973\_nt3521\_Genome\_Tile\_rc|1  
GTAGCTCCACCAAGGCACTGTCTGTTGTTTGTGTTGTTTGTGTTGACACGGTTTGCCTGG  
>HPV30\_Alpha\_396973\_nt3541\_Genome\_Tile\_rc|1  
CGACTTCTGTGTTGTAACATGTAGCTCCACCAAGGCACGTGCTGTTGTTTGTGTTGTTTG  
>HPV30\_Alpha\_396973\_nt3661\_Genome\_Tile\_rc|1  
GATATGTAGACGATATATTTACAAATAGGTGCTTATGTTTTTGACACCTATATCTTAAAC  
>HPV30\_Alpha\_396973\_nt3701\_Genome\_Tile\_rc|1  
ACAGTAATGTAGCTGTACTCTGTATGTGTATTGGTCCAATGATATGTAGACGATATATTT  
>HPV30\_Alpha\_396973\_nt3721\_Genome\_Tile\_rc|1  
GGGTCTCATCTTTATATACAACAGTAATGTAGCTGTACTCTGTATGTGTATTGGTCCAAT  
>HPV30\_Alpha\_396973\_nt3741\_Genome\_Tile\_rc|1  
ATTTAAAAAGTTGGCACGCTGGGTCTCATCTTTATATACAACAGTAATGTAGCTGTACTC  
>HPV30\_Alpha\_396973\_nt3861\_Genome\_Tile\_rc|1  
TTTACATGTGGAATACAATATTACATGTTTGTGTACCAATTACAACATATGTGTTGTTA  
>HPV30\_Alpha\_396973\_nt4121\_Genome\_Tile\_rc|1  
ATATAAAAAAACAGCAAAAATATAGTAAATGCAGTAATGTAGGACGATGCAACAACAAAC  
>HPV30\_Alpha\_396973\_nt4141\_Genome\_Tile\_rc|1  
CATATACAAGTAATAAAGGTATATAAAAAAACAGCAAAAATATAGTAAATGCAGTAATGT  
>HPV30\_Alpha\_396973\_nt4481\_Genome\_Tile\_rc|1  
AGCAGGGGATGCGTCCACAACCTGTTGTAGGCCGTGTACCTAACGGAACATAACCAGCAG  
>HPV30\_Alpha\_396973\_nt4981\_Genome\_Tile\_rc|1  
GGATTATCCACAGTAATTAATGTTTCAGGTTTGGTAAGGAATGTGGGGTCAGTGACCTTT  
>HPV30\_Alpha\_396973\_nt5421\_Genome\_Tile\_rc|1  
AAATAGGAACATCCCAATATTTACCCAAAGGTATAGTAACATTGGTAGTTTGACTACTAA  
>HPV30\_Alpha\_396973\_nt5441\_Genome\_Tile\_rc|1

TACTATATCGGGGCCCCGAATAAATAGGAACATCCCAATATTTACCCAAAGGTATAGTAAC  
>HPV30\_Alpha\_396973\_nt5461\_Genome\_Tile\_rc|1  
GTGGTAGGACCAGTAGGCAATACTATATCGGGGCCCCGAATAAATAGGAACATCCCAATAT  
>HPV30\_Alpha\_396973\_nt5481\_Genome\_Tile\_rc|1  
CCTGAGGGGCATAGGGCCATGTGGTAGGACCAGTAGGCAATACTATATCGGGGCCCCGAAT  
>HPV30\_Alpha\_396973\_nt5501\_Genome\_Tile\_rc|1  
ATGTGTAGTGTCAAATGGGGCCTGAGGGGCATAGGGCCATGTGGTAGGACCAGTAGGCAA  
>HPV30\_Alpha\_396973\_nt7101\_Genome\_Tile\_rc|1  
CAATCACCGCCGCTTGCGTTTGGCTGATGGTGTAGAGGTAGAGGAACTGGGGGCCGAGCG  
>HPV30\_Alpha\_396973\_nt7161\_Genome\_Tile\_rc|1  
TCCATACAAAAACATACATTTCATGCACAATAAATAGTAAGGAAACATACACAGACACAAA  
>HPV30\_Alpha\_396973\_nt7201\_Genome\_Tile\_rc|1  
ATACATACAGTCATACAGAAACATATAAAACAAAACATACATCCATACAAAAACATACATT  
>HPV30\_Alpha\_396973\_nt7381\_Genome\_Tile\_rc|1  
TAATATAAATATAAAAAAGTAACTGCACAGTGGTGTGCAACAACCAAAAAAGGGTGGAGGAC  
>HPV30\_Alpha\_396973\_nt7421\_Genome\_Tile\_rc|1  
GAGGGCACAAATGCATAAAATGGACACTACTGTGGTGGTATAATATAAATATAAAAAAGTA  
>HPV30\_Alpha\_396973\_nt7441\_Genome\_Tile\_rc|1  
ATCGGTTGAAAGGTAAAATGGAGGGCACAAATGCATAAAATGGACACTACTGTGGTGGTA  
>HPV30\_Alpha\_396973\_nt7561\_Genome\_Tile\_rc|1  
ACGTTGCAAAAAAACAATAAAGTGCAGGAAACGGCACCATGCCAGTGGATTAAAGTGTTT  
>HPV27\_Alpha\_396964\_nt0001\_Genome\_Tile\_rc|1  
GTTTTTCGGTTACACCCTATTTTTTAAATAAAGGATTATAGTTATATATTATAAACACATA  
>HPV27\_Alpha\_396964\_nt4081\_Genome\_Tile\_rc|1  
AAAACATATATATACAGGTTAGCAGCAAAATGGTGGCGATATGTCACAATTATTGTAAAAAC  
>HPV27\_Alpha\_396964\_nt4201\_Genome\_Tile\_rc|1  
CCAATGAGGGTGAGAATCACCAACAGACAGTCAATATCATCACGACCCCAATATCACA  
>HPV27\_Alpha\_396964\_nt4221\_Genome\_Tile\_rc|1  
AAAACAACAACAATAATAAGCCAATGAGGGTGAGAATCACCAACAGACAGTCAATATCAT  
>HPV27\_Alpha\_396964\_nt4281\_Genome\_Tile\_rc|1  
AAAAGAGATAATGTATCAAAAGGGGTGAGGGGTGTTAGGTGTGTTGGATCAAACGGACAT  
>HPV27\_Alpha\_396964\_nt4601\_Genome\_Tile\_rc|1  
ACAACAGGTGGCTTGGGTGCCACACCAATATCAACCACAGTGGTCGGCCTGGTACCTACA  
>HPV27\_Alpha\_396964\_nt5481\_Genome\_Tile\_rc|1  
AGATGCAGAGGAGGCAGATACCGTGGTATTAGCCAGGGAGCCGCGAGGGGCTGGGTAGTA  
>HPV27\_Alpha\_396964\_nt5901\_Genome\_Tile\_rc|1  
GACACCTTAGGCACTGCCAACCTATTATTGCTACCCTTCTTTATAGAATAATATGGGTGG  
>HPV27\_Alpha\_396964\_nt5921\_Genome\_Tile\_rc|1  
ATACACGGTATTGGTAGCCGGACACCTTAGGCACTGCCAACCTATTATTGCTACCCTTCT  
>HPV27\_Alpha\_396964\_nt6761\_Genome\_Tile\_rc|1  
CTTTATAATTAGTATTATCAGACACCTCAGCTGCACACAGAGAGACATTGGTACTCCGTG  
>HPV27\_Alpha\_396964\_nt7221\_Genome\_Tile\_rc|1  
AGGTAGACAGAGGAAATTATCGAGACACTCACACGTAACGCCTCACCCGTTTGCGTTTAC  
>HPV27\_Alpha\_396964\_nt7241\_Genome\_Tile\_rc|1  
AACACCAAATATTATGTAAAAGGTAGACAGAGGAAATTATCGAGACACTCACACGTAACG  
>HPV27\_Alpha\_396964\_nt7261\_Genome\_Tile\_rc|1  
ACACAAACATAAGCACAAACAACACCAAATATTATGTAAAAGGTAGACAGAGGAAATTAT  
>HPV27\_Alpha\_396964\_nt7281\_Genome\_Tile\_rc|1  
TAACATACGTACAAACAACAACAACAATAAGCACAAACAACCAAAATATTATGTAAA  
>HPV25\_Beta\_396948\_nt0001\_Genome\_Tile\_rc|1  
CAGCAACAAGTACGAATGAGTAATAATTTAACCGCGCCCGTATCAATAGACTTACCGTTA  
>HPV25\_Beta\_396948\_nt0201\_Genome\_Tile\_rc|1  
GCTGTATAACCTGCGCTTGCTCTGGTGGTCCTATGCTCTGTTTCAGCATTTGCAGTTGCCA  
>HPV25\_Beta\_396948\_nt0341\_Genome\_Tile\_rc|1  
CAAACATAAGTCTTTTCTCATCAAACCTCACAGATCTCTAAATATGTTAGAAAAGTTGCCACA

>HPV25\_Beta\_396948\_nt0461\_Genome\_Tile\_rc|1  
TGTAACGTCTTCAATTTCCCTACCTGTTACAGTGCTTTCGTAAATTCATTAAATTCAAA  
>HPV25\_Beta\_396948\_nt1801\_Genome\_Tile\_rc|1  
TTGGTGGGCTATCCAATCTGGATATGAGCCATATGTAAATACTCCGGAACCCATTGATCC  
>HPV25\_Beta\_396948\_nt2101\_Genome\_Tile\_rc|1  
AATGGTGGACCATTGACCCTCTCCTTCCACTTCATGAATTTTAGTATAAATCCATTTCAGA  
>HPV25\_Beta\_396948\_nt2121\_Genome\_Tile\_rc|1  
TGATACCTTAAAAATTGTACAATGGTGGACCATTGACCCTCTCCTTCCACTTCATGAATT  
>HPV25\_Beta\_396948\_nt2141\_Genome\_Tile\_rc|1  
ACATTATAAAGTTGACTTGCTGATACCTTAAAAATTGTACAATGGTGGACCATTGACCCT  
>HPV25\_Beta\_396948\_nt2281\_Genome\_Tile\_rc|1  
ACAGAATGATAATACCCTACCCTTTAACTACTTTTATCAATGACATAGTAAAAGCTGATTT  
>HPV25\_Beta\_396948\_nt2481\_Genome\_Tile\_rc|1  
TTTATATTGGATGTAAGCAATAGTGCAGGAAATTTTGTCTGCATTGGTGCCTTGTGTTTA  
>HPV25\_Beta\_396948\_nt4521\_Genome\_Tile\_rc|1  
TAAAGAAGGTCTAATAACCGTGGGGGTTCACCAACACGTATCGGACCTTCTCCCAAAGG  
>HPV25\_Beta\_396948\_nt4721\_Genome\_Tile\_rc|1  
CCTCTAGAAGTTGTTGTACCGGGGTGTCACTGGAGGGTACAACAGGCCAGGATGTATT  
>HPV25\_Beta\_396948\_nt5201\_Genome\_Tile\_rc|1  
CTGTCAGGAGGCTCCTGAAAATCATTAAATCCTGCTCAAAAATTTGTGTAACCTTCGTCC  
>HPV25\_Beta\_396948\_nt5661\_Genome\_Tile\_rc|1  
CACATAGTATCCCTGAATATCTTGGGTATAATATGATGCAGAGCGTGTAGTTTCAACACG  
>HPV25\_Beta\_396948\_nt5681\_Genome\_Tile\_rc|1  
TCTCTATCCTCAGGATAGGACACATAGTATCCCTGAATATCTTGGGTATAATATGATGCA  
>HPV25\_Beta\_396948\_nt6041\_Genome\_Tile\_rc|1  
TGTTGATTTCTTGACACTTTTGGAAATTTGCAATTTAGAGCCTTGGACGTTGTACACATTA  
>HPV25\_Beta\_396948\_nt6741\_Genome\_Tile\_rc|1  
ATACATTGAGTTACCTAGATTATTATATTGAGCCTGACTACTGTTAGGTGGTATGTAAAA  
>HPV25\_Beta\_396948\_nt6981\_Genome\_Tile\_rc|1  
TACATGTCTCAAATATTCTGTAAATTTTGTGAGAATTATAATCAGTGATTTTGGAAACATC  
>HPV25\_Beta\_396948\_nt7041\_Genome\_Tile\_rc|1  
TATTTCTGCCTTCAACGGTACTTTGCAAAGTTGTAATATTAATGATAACTCATATTCTTC  
>HPV25\_Beta\_396948\_nt7181\_Genome\_Tile\_rc|1  
GGAGGATTTTATCTGGACAACGTGTGGCTAAAGAATCAATGTAGCGATAAGTATCCTGA  
>HPV25\_Beta\_396948\_nt7381\_Genome\_Tile\_rc|1  
AATTTTTACGTTTTCTTTTTATTCCCCTAGTAGATATTTCGGGAGGAACTGTTTTTGTAC  
>HPV25\_Beta\_396948\_nt7561\_Genome\_Tile\_rc|1  
TAAAGACGATACGCATCTGGCGAGCAGCTGCCTGAGTTTGGCACAGACTGTATCTGATTT  
>HPV19\_Beta\_396940\_nt0181\_Genome\_Tile\_rc|1  
ACAATTTCTATCTCTTCTCTGTAGCCTGTGCGTTAGCCATAAGTTTGCAGCTGCAAAAT  
>HPV19\_Beta\_396940\_nt0201\_Genome\_Tile\_rc|1  
GTGCAGTAGTTCCCTCTTCTACAATTTCTATCTCTTCTTCTGTAGCCTGTGCGTTAGCCA  
>HPV19\_Beta\_396940\_nt0281\_Genome\_Tile\_rc|1  
TAAACAGTCATCCAACGGTATTTCTAGCAATGCTGCTAATCCAGCAATTGTTGCTGGTAA  
>HPV19\_Beta\_396940\_nt0321\_Genome\_Tile\_rc|1  
CTAAATGTGATAAAAACCTTGCCACAGAAATTACAAGGCACTAAACAGTCATCCAACGGTA  
>HPV19\_Beta\_396940\_nt0341\_Genome\_Tile\_rc|1  
ATCATCAAATTCGCACGCTTCTAAATGTGATAAAAACCTTGCCACAGAAATTACAAGGCAC  
>HPV19\_Beta\_396940\_nt1801\_Genome\_Tile\_rc|1  
ATCTGGGTATGGACCATAAGTAAACCTCCAGATCCCATACAGCCCTTATACCAAATAA  
>HPV19\_Beta\_396940\_nt3681\_Genome\_Tile\_rc|1  
TGCTCCCTCTTGATCGCAAGGAGGTTGTGGAGGAAGTGGCTGAGGGTGACCTGGAGGATT  
>HPV19\_Beta\_396940\_nt3781\_Genome\_Tile\_rc|1  
CGTTTGGTGTGGTGGGGGATGGTGACTCTCTGGATCGTTTCCCTCTCCCCCTACTGCGC  
>HPV19\_Beta\_396940\_nt4121\_Genome\_Tile\_rc|1

AGGATACCTTACTGTATCATCAAAGTGCTTTCGTTGATTAAAGGAGACAAAACCTAATGAG  
>HPV19\_Beta\_396940\_nt4141\_Genome\_Tile\_rc|1  
AACGATCGGTCCACACCTTTAGGATACCTTACTGTATCATCAAAGTGCTTTCGTTGATTAA  
>HPV19\_Beta\_396940\_nt4481\_Genome\_Tile\_rc|1  
TCACCGTTGCAGTACCACCAACACGTACTGGACCCTCCCCCAAAGGCACGTAACCAGTTG  
>HPV19\_Beta\_396940\_nt4681\_Genome\_Tile\_rc|1  
GGTCACTGGGGTATCTGTTGAGGGTATACTAGGTGTAGGGTGCACCTCTGCAATGGTTTC  
>HPV19\_Beta\_396940\_nt5041\_Genome\_Tile\_rc|1  
TACTTGTGTACTAAACGCCTATTTGTTAATCCTCCCCTTCGCCTAAATGCAGTTCTAAG  
>HPV19\_Beta\_396940\_nt5081\_Genome\_Tile\_rc|1  
ACCTTGAAGGCTGAGTTAAGAATATGGGATCATCTACAGCTACTTGTGTACTAAACGCC  
>HPV19\_Beta\_396940\_nt5101\_Genome\_Tile\_rc|1  
ATCAAAGTGAAGAAAGAACTAACCTTGAAGGCTGAGTTAAGAATATGGGATCATCTACAGC  
>HPV19\_Beta\_396940\_nt5201\_Genome\_Tile\_rc|1  
CTAAAGTTTGCACATCCAAAAATCCCTATTAGGTGGCTCCCGAAAAATTATCTAAATCTT  
>HPV19\_Beta\_396940\_nt5261\_Genome\_Tile\_rc|1  
TTTGGCCTAGGCGACTAACTCTGATGTAACCAGATGGTGTCTCTGAATATTGTGGCCTAC  
>HPV19\_Beta\_396940\_nt5441\_Genome\_Tile\_rc|1  
CATCAATATTAATATTTATAAATGTGCTTCTGTATTACCTTGAAGCTATTGAAGCGTCAC  
>HPV19\_Beta\_396940\_nt5521\_Genome\_Tile\_rc|1  
ACTAAAGTCTTCTGTGCTTCATCTAAAAGCAAATCTTCTGAGTTAGCAGTAATACTATA  
>HPV19\_Beta\_396940\_nt5561\_Genome\_Tile\_rc|1  
TGGAAGTAGAACGGCGCCCACTAACTGTGACCCACTAAAGTCTTCTGTGCTT  
>HPV19\_Beta\_396940\_nt5581\_Genome\_Tile\_rc|1  
AAATTGGGGAAGTGTATATGTGGAAGTAGAACGGCGCCCACTAACTGTGACCC  
>HPV19\_Beta\_396940\_nt5601\_Genome\_Tile\_rc|1  
GATCCAGACCTTGTAGTTTCAAATTGGGGAAGTGTATATGTGGAAGTAGAACGGCGCCCA  
>HPV19\_Beta\_396940\_nt5801\_Genome\_Tile\_rc|1  
CTGCAAAAGAAAATTATAAATATTTACGTTTTCGTTTGAATCGCTTGCGAAGGCTGGGAT  
>HPV19\_Beta\_396940\_nt6001\_Genome\_Tile\_rc|1  
GAAACTTTTGAATTTCTAATTTTGTATCCTGCAACATTATAAACATTAAAAATATGGGTGA  
>HPV19\_Beta\_396940\_nt6361\_Genome\_Tile\_rc|1  
GGAGGACAGGATCCCTGAGGAATATCTTGCTCAGCACATGGTAATGCTTTATCCCAGTGT  
>HPV19\_Beta\_396940\_nt6381\_Genome\_Tile\_rc|1  
CTGAGTTAATTAATCTATAGGAGGACAGGATCCCTGAGGAATATCTTGCTCAGCACATG  
>HPV19\_Beta\_396940\_nt6701\_Genome\_Tile\_rc|1  
TCCTAAATTAGTATATTGTTGCTGACTATTGTTAGGAGGTATGTAGTATGTATTTTTCAT  
>HPV19\_Beta\_396940\_nt7361\_Genome\_Tile\_rc|1  
ACAAATTTAATTTTTACGCTTTCTTTTAGTTCCCTCTGCTGGAGACCCGTGAAGATATAGT  
>HPV19\_Beta\_396940\_nt7541\_Genome\_Tile\_rc|1  
GTGTTAAAAACAACGAAGATCAGATCTGGCCAGCTGCTGTGCCTGATGCGGCTCAGACTGT  
>HPV19\_Beta\_396940\_nt7621\_Genome\_Tile\_rc|1  
CGGTCCCTTACCTTTGCCAAGTGCAGTGCCAAAAGAGATTGGCAAGATTATGATTCCATTG  
>HPV17\_Beta\_396932\_nt0201\_Genome\_Tile\_rc|1  
CTAATGGAATACACAAGGTATCAGCAAGCTCCCTCACTGTTTGAGGTTTGGCCTATCCA  
>HPV17\_Beta\_396932\_nt0221\_Genome\_Tile\_rc|1  
GCAAGGTAATAAAATATCCACTAATGGAATACACAAGGTATCAGCAAGCTCCCTCACTGT  
>HPV17\_Beta\_396932\_nt0241\_Genome\_Tile\_rc|1  
AAAAACCTATTACAAAATCTGCAAGGTAATAAAATATCCACTAATGGAATACACAAGGTA  
>HPV17\_Beta\_396932\_nt0261\_Genome\_Tile\_rc|1  
CCACCAATTCTATGTAAGCTAAAAACCTATTACAAAATCTGCAAGGTAATAAAATATCCA  
>HPV17\_Beta\_396932\_nt0301\_Genome\_Tile\_rc|1  
TCTTCAGTCCAAATTAAGTCAAAACCTTTTAAATCAAACGCCACCAATTCTATGTAAGCT  
>HPV17\_Beta\_396932\_nt0421\_Genome\_Tile\_rc|1  
ATTGGCTTGTGCTCTATTTCTCTAACTCCCTTCCACTCACTGATTGTTCAATAAACTTA

>HPV17\_Beta\_396932\_nt1621\_Genome\_Tile\_rc|1  
GCTACTTGCAGAATATTCATAAGCAATCGTGATACAGTTTCCCTACTTTTCCGACATTA  
>HPV17\_Beta\_396932\_nt1641\_Genome\_Tile\_rc|1  
CTGCTAACATTTGTACCTCTGCTACTTGCAGAATATTCATAAGCAATCGTGATACAGTTT  
>HPV17\_Beta\_396932\_nt1801\_Genome\_Tile\_rc|1  
ATGGTAGATAGATCGAATTGTGTTGCCTGTGCTGTTTGATGATTAATCATAGTTTGTGTT  
>HPV17\_Beta\_396932\_nt2021\_Genome\_Tile\_rc|1  
AACAACTAATAATTTTCTATGTACCCACGTAGAAATGCTCATTTCCCTTCATTTCTCCACG  
>HPV17\_Beta\_396932\_nt2101\_Genome\_Tile\_rc|1  
AATATATCTAAAAACCTAATAAAATTAATGTCCTGATATCTAATAAAATTTACTATATCA  
>HPV17\_Beta\_396932\_nt2741\_Genome\_Tile\_rc|1  
AACAGTACTTGTTCCTGTCTTAATAATTGCCAGTGTTTTATTTGAGTCTCTATATCTTCT  
>HPV17\_Beta\_396932\_nt2761\_Genome\_Tile\_rc|1  
CATTTTTTCTGGCATAGTAAACAGTACTTGTTCCTGTCTTAATAATTGCCAGTGTTTTTA  
>HPV17\_Beta\_396932\_nt3061\_Genome\_Tile\_rc|1  
CAACTTTATTCAGGTGTCATCTAAATTTTGGTAATAAATAAATGACCACACTGTATATG  
>HPV17\_Beta\_396932\_nt3801\_Genome\_Tile\_rc|1  
AACTAAACTGCCATATCGCTTTTTTGCTCTATATCGAAAGCATTTTCAGTTTGTTAGCTTC  
>HPV17\_Beta\_396932\_nt3821\_Genome\_Tile\_rc|1  
CATGTAGTGCTGTAATATTTAACTAACTGCCATATCGCTTTTTTGCTCTATATCGAAAG  
>HPV17\_Beta\_396932\_nt3841\_Genome\_Tile\_rc|1  
TATTTGCACCCACCCATGACCATGTAGTGCTGTAATATTTAACTAACTGCCATATCGCT  
>HPV17\_Beta\_396932\_nt3861\_Genome\_Tile\_rc|1  
TCTACCTATTCTGTCAATTAGTATTTGCACCCACCCATGACCATGTAGTGCTGTAATATTT  
>HPV17\_Beta\_396932\_nt3881\_Genome\_Tile\_rc|1  
AATGCTAGTAACATTCTTGATCTACCTATTCTGTCATTAGTATTTGCACCCACCCATGAC  
>HPV17\_Beta\_396932\_nt3901\_Genome\_Tile\_rc|1  
CTCTTTCATCATATGTGTTAAATGCTAGTAACATTCTTGATCTACCTATTCTGTCATTAG  
>HPV17\_Beta\_396932\_nt3921\_Genome\_Tile\_rc|1  
CATTTTTTGGATAAACAATTCTCTTTCATCATATGTGTTAAATGCTAGTAACATTCTTGA  
>HPV17\_Beta\_396932\_nt4001\_Genome\_Tile\_rc|1  
CAAGGTTAGTAATGTTAAAAAGTAATGCCTATAAATCATCTAGATGTCCTAGTGACCAA  
>HPV17\_Beta\_396932\_nt4701\_Genome\_Tile\_rc|1  
GGAACCTCCTATGTTTTGTCCACCAAACCTTCGAACACTAAAACATGATCCGCCATAGC  
>HPV17\_Beta\_396932\_nt4721\_Genome\_Tile\_rc|1  
GTATCAATGGCTGCATTCCCTGGAACCTCCTATGTTTTGTCCACCAAACCTTCGAACACT  
>HPV17\_Beta\_396932\_nt4741\_Genome\_Tile\_rc|1  
TTTCAAAGCTCTCCTGTGCTGTATCAATGGCTGCATTCCCTGGAACCTCCTATGTTTTGTC  
>HPV17\_Beta\_396932\_nt4841\_Genome\_Tile\_rc|1  
AAGCTTGATAGTGATTCTACTGCACGTTGAACTGGAGTACTTGTTCTAGGAGGTGTGCCT  
>HPV17\_Beta\_396932\_nt4881\_Genome\_Tile\_rc|1  
AACTTGTTTCAGTCAATCGTCTATTGTATAAAGCTCTTCTTAAGCTTGATAGTGATTCTAC  
>HPV17\_Beta\_396932\_nt5121\_Genome\_Tile\_rc|1  
GCGAGTACGAATGCTGGCTCTTCTACCTAGTCTACTGACTCGTAAATAACCCTGAGGTGT  
>HPV17\_Beta\_396932\_nt5321\_Genome\_Tile\_rc|1  
GCCAGTGGTGATTCTTGGATGCCTACATTCAAAGGCCCTGGTTCATCAATATTAATGTCT  
>HPV17\_Beta\_396932\_nt5341\_Genome\_Tile\_rc|1  
AATCTTCTTCTATAGTGTACGCCAGTGGTGATTCTTGGATGCCTACATTCAAAGGCCCTG  
>HPV17\_Beta\_396932\_nt5361\_Genome\_Tile\_rc|1  
TAACAAATCTGCAGAATTGAAATCTTCTTCTATAGTGTACGCCAGTGGTGATTCTTGGAT  
>HPV17\_Beta\_396932\_nt5381\_Genome\_Tile\_rc|1  
TCATCTACAGCATCTTCCAGTAACAAATCTGCAGAATTGAAATCTTCTTCTATAGTGTCA  
>HPV17\_Beta\_396932\_nt5461\_Genome\_Tile\_rc|1  
TAGGTGTTTTCAAACCGGGGACAGTTACAGATGTTGTGCTGCGCGAGGATTGCCAAATA  
>HPV17\_Beta\_396932\_nt5521\_Genome\_Tile\_rc|1

GTGACTCTGGATATGCTACTGTGTATCCCTGAGTGTTCATGTATGTAAAAGCCAGTGTCCC  
>HPV17\_Beta\_396932\_nt6221\_Genome\_Tile\_rc|1  
CACAGGCCTGTTTGATTGTTTTGTTTCATTTTCACATACAGGAGCCCTGTCCCAATGTTCT  
>HPV17\_Beta\_396932\_nt6241\_Genome\_Tile\_rc|1  
TTTTTAATTCCAATGGTGGACACAGGCCCTGTTTGATTGTTTTGTTTCATTTTCACATACAG  
>HPV17\_Beta\_396932\_nt7101\_Genome\_Tile\_rc|1  
AAATTTTCGTCTTAGGGGATACTGATCTAAATCTAATGATAATTTCTCAGTAAGATTTAC  
>HPV15\_Beta\_396924\_nt0281\_Genome\_Tile\_rc|1  
CAGACCTTTACGATTCAAACCTTACTAATTCTATATATGTTAAAAATCTCTGACAAAATCT  
>HPV15\_Beta\_396924\_nt0421\_Genome\_Tile\_rc|1  
ACAGGCTTCTGTTCTACTATCTCTATTTCCCAACTACACACCGACTGTTCAATAAAGTTA  
>HPV15\_Beta\_396924\_nt0441\_Genome\_Tile\_rc|1  
AGCGAATAATAATATCTCCAACAGGCTTCTGTTCTACTATCTCTATTTCCCAACTACACA  
>HPV15\_Beta\_396924\_nt0461\_Genome\_Tile\_rc|1  
TTTCTTCAGACAAAATTTGCAGCGAATAATAATATCTCCAACAGGCTTCTGTTCTACTAT  
>HPV15\_Beta\_396924\_nt1601\_Genome\_Tile\_rc|1  
TATTTTCAGATACTTGTAACAAATTCGTAAGTAATCTTAATACTGTTTCTCTACTTTTACC  
>HPV15\_Beta\_396924\_nt2101\_Genome\_Tile\_rc|1  
TTAGGAGTATTATGTAAAAAGCTTTTAAATGAATCTAAAAATTTGTATAAAATTTATATCT  
>HPV15\_Beta\_396924\_nt2441\_Genome\_Tile\_rc|1  
TCTACTGCGTAAATATTTATACCTTTCTTCTTCATGATATCAATGTTAGAAGTTAGCAT  
>HPV15\_Beta\_396924\_nt3041\_Genome\_Tile\_rc|1  
TTTTTCCTTCCACCTTGTTCCATGTGTCTCTAAAGTCTGGTAATAAATGTATGTCCAAAC  
>HPV15\_Beta\_396924\_nt3081\_Genome\_Tile\_rc|1  
TAAGAGTTCCCTTCCAAATAATATGCGCCATGATAGTCAATTTTTCTTCCACCTTGTTCC  
>HPV15\_Beta\_396924\_nt3901\_Genome\_Tile\_rc|1  
ATTTTGATAAAGAGCTCTCTTTTCGGTGTGGAAGAGAATGCCAGTAACAATCGTGAGCGT  
>HPV15\_Beta\_396924\_nt3921\_Genome\_Tile\_rc|1  
CGCCTGGTGGCAGTTTCATTATTTTGATAAAGAGCTCTCTTTTCGGTGTGGAAGAGAATG  
>HPV15\_Beta\_396924\_nt4001\_Genome\_Tile\_rc|1  
AGCAATAAAAAAACTACTGTTAGTTGATTAAAAAGCACAAAAATCATAAATCATCTAA  
>HPV15\_Beta\_396924\_nt5441\_Genome\_Tile\_rc|1  
TAGGTGATTCAAATCTAGGTACTGTATATGTTGTAGTGCTGCGCCGTGATTGCCAAACA  
>HPV15\_Beta\_396924\_nt5461\_Genome\_Tile\_rc|1  
TATGTAAACCCAGTATTTCTAGGTGATTCAAATCTAGGTACTGTATATGTTGTAGTGCT  
>HPV15\_Beta\_396924\_nt5481\_Genome\_Tile\_rc|1  
TTATACCCATGCACATCTTGATGTAAAACCCAGTATTTCTAGGTGATTCAAATCTAGGT  
>HPV15\_Beta\_396924\_nt6041\_Genome\_Tile\_rc|1  
TTATTCTCTGTATCTTTTACTTTGTTGAATAAAGGATGGCCTGAAGTACCAACTCCTAAT  
>HPV15\_Beta\_396924\_nt6061\_Genome\_Tile\_rc|1  
AGTTGCCTTGATAATTACTGTTATTCTCTGTATCTTTTACTTTGTTGAATAAAGGATGGC  
>HPV15\_Beta\_396924\_nt6321\_Genome\_Tile\_rc|1  
CACTATATCCAGACTCACATCTGACTTAGTAAGTGAAGGCCTTGTTATTAATGTTACC  
>HPV15\_Beta\_396924\_nt6561\_Genome\_Tile\_rc|1  
ACTAACTGTGGGAAAGTAAGTAGAATTTGCTAAGTTATTTTGTTGTTGGGTTGATTGTGC  
>HPV15\_Beta\_396924\_nt6721\_Genome\_Tile\_rc|1  
CATCAGAGGTAACTAATAAGTAAATTTGTATTTCCTTGTTGTTATCTGCAACAGTAATAA  
>HPV15\_Beta\_396924\_nt6741\_Genome\_Tile\_rc|1  
ATATTCAATTATGGCATTACCATCAGAGGTAACACTAATAGTAAAAATTTGTATTCCTTGT  
>HPV14D\_Beta\_396918\_nt0161\_Genome\_Tile\_rc|1  
CTGTTGAAGAGTCAGTTGTCGCCATGAGTCTGCATTCTCTGTTTTTCTGTAGTATATAT  
>HPV14D\_Beta\_396918\_nt0261\_Genome\_Tile\_rc|1  
CCAAATATAGTTGCAGGTAATGGTGGCTCTATAAAGAAGATTTGGTTTCTGTGCTATCA  
>HPV14D\_Beta\_396918\_nt2181\_Genome\_Tile\_rc|1  
CTAAAGAAACATAATGACCATCAAGGCCATTCTCAAATAAGTGTCCATATACAACCAAC

>HPV14D\_Beta\_396918\_nt3941\_Genome\_Tile\_rc|1  
AAAAATGCAATAAATGTTAGATGTTAGTAGCAAGCTATTATGTTAGTATGTTAGGGGTGT  
>HPV14D\_Beta\_396918\_nt3961\_Genome\_Tile\_rc|1  
AAATAATGCAAACAAAAAGCAAAAATGCAATAAATGTTAGATGTTAGTAGCAAGCTATTA  
>HPV14D\_Beta\_396918\_nt4741\_Genome\_Tile\_rc|1  
ATAGCTGTCTGTATCCTTTGTAATGGGGTACTAGTTCTTCTAGGGGGTGTGTTGTTCTTCG  
>HPV14D\_Beta\_396918\_nt4761\_Genome\_Tile\_rc|1  
TAAGCCCCACCCCTCCTTCTTATAGCTGTCTGTATCCTTTGTAATGGGGTACTAGTTCTTC  
>HPV14D\_Beta\_396918\_nt4781\_Genome\_Tile\_rc|1  
TTGGACTAAGCGCCTATTTGTAAGCCCCACCCCTCCTTCTTATAGCTGTCTGTATCCTTTG  
>HPV14D\_Beta\_396918\_nt4821\_Genome\_Tile\_rc|1  
ATGGTCTTGTAAATAAGGGGTTTTCTACAGAACTTGTTGGACTAAGCGCCTATTTG  
>HPV14D\_Beta\_396918\_nt4841\_Genome\_Tile\_rc|1  
CTGAAATGCACTAGTCTAGATGGTCTTGTTAAATAAGGGGTTTTCTACAGAACTTG  
>HPV14D\_Beta\_396918\_nt5361\_Genome\_Tile\_rc|1  
TTGTATCCTGTGCATAATATGACCCAGATCTGGTTGTTTCAAACGAGGGACGGTATATG  
>HPV14D\_Beta\_396918\_nt5981\_Genome\_Tile\_rc|1  
TCTGTCAATCAGTGGAGTTAGCTTGTTCCTGTATGAGTTGGGATTTTCTGTATCACCAC  
>HPV14D\_Beta\_396918\_nt7101\_Genome\_Tile\_rc|1  
TCTAATTCTTGCCTTTTCGTTTAATACCTTGATGGATCCCCTAGTCGAACTGTTTTTG  
>HPV14D\_Beta\_396918\_nt7301\_Genome\_Tile\_rc|1  
GATGTAGCTTGATCCAACGCGGCTCGCGCTGTATCTGATCTGGCGCAAACCTGAGTTGGC  
>HPV14D\_Beta\_396918\_nt7321\_Genome\_Tile\_rc|1  
AGTCTTTTGCCTGTTTCAGACGATGTAGCTTGATCCAACGCGGCTCGCGCTGTATCTGATC  
>HPV14D\_Beta\_396918\_nt7361\_Genome\_Tile\_rc|1  
AAATTCGAACACAATAGACTGGCACACTTACATTCCTTGAGTCTTTTGCCTGTTTCAGAC  
>HPV12\_Beta\_396910\_nt0281\_Genome\_Tile\_rc|1  
ATCTAAGAACTTCCGCAAAAATTGCAAGGTACCAAACAGTCAACTAAAGGTATATCTAA  
>HPV12\_Beta\_396910\_nt0501\_Genome\_Tile\_rc|1  
TATCTAAAAATGACAAGCACGTCTGACACCTTATCTTTAAGTCAAATATAGATTTTCCAG  
>HPV12\_Beta\_396910\_nt1901\_Genome\_Tile\_rc|1  
ATTGATAAGCTATATCTGGTTCTTCTAAGTAATTATTATCGAAGGCCCATTTGGACCATGG  
>HPV12\_Beta\_396910\_nt2441\_Genome\_Tile\_rc|1  
ACTTAATTTGTACGGGCGCTTTATATTTACAATCTAAAGAAACAAAATGGCCGTCTAAGC  
>HPV12\_Beta\_396910\_nt4221\_Genome\_Tile\_rc|1  
GCCATAGCAATAATAAAAACGTAAAAATAAATGTAAAAAAATTGTTAGTGTGGTTAGTAG  
>HPV12\_Beta\_396910\_nt4441\_Genome\_Tile\_rc|1  
CCCTTCAGGTAGAGGTCTGTATCCAGTGACACCTCCAGTACCGCGACCGGTACCAATACC  
>HPV12\_Beta\_396910\_nt4461\_Genome\_Tile\_rc|1  
CCTCCAACACGGATACCGGGCCCTTCAGGTAGAGGTCTGTATCCAGTGACACCTCCAGTA  
>HPV12\_Beta\_396910\_nt4601\_Genome\_Tile\_rc|1  
GTAGATCAGTTGCTGAGGATTCAAGTAAATGGAACACCGAGGAAGCAGTGGGCTCCACAG  
>HPV12\_Beta\_396910\_nt4681\_Genome\_Tile\_rc|1  
TGTTGTACACAACAGGTGAATCAATCGTAGGGCCCTCTGAAACAGGATTAATCTCAGCTAT  
>HPV12\_Beta\_396910\_nt5021\_Genome\_Tile\_rc|1  
TTCTATTTGTTAGGGACACTCCTCTACGTCGGCCAGTGGTTTGTGTCCCTCTGAAGTGGAG  
>HPV12\_Beta\_396910\_nt5061\_Genome\_Tile\_rc|1  
ATAAATAAAGGATTATCAACTTGCACTTGTGTACTAGCCTTCTATTTGTTAGGGACACT  
>HPV12\_Beta\_396910\_nt5081\_Genome\_Tile\_rc|1  
CTAACTTAGAAGGTTTATCTATAAATAAAGGATTATCAACTTGCACTTGTGTACTAGCC  
>HPV12\_Beta\_396910\_nt5101\_Genome\_Tile\_rc|1  
GTTATCAAAATGAAAAGCGTACTAACTTAGAAGGTTTATCTATAAATAAAGGATTATCAAC  
>HPV12\_Beta\_396910\_nt5201\_Genome\_Tile\_rc|1  
GACTTAGCTTTTTAATATCAAGGAAATCCCTATCAGGTGGCTCCTCAAAATGTTTCTAAGT  
>HPV12\_Beta\_396910\_nt5441\_Genome\_Tile\_rc|1

CTTCCGCTATGTCCATATCTACAAATGTACTTTCAACAGTGCCTTGCACTATGGTTGCAT  
>HPV12\_Beta\_396910\_nt5601\_Genome\_Tile\_rc|1  
ACATAATAAGAACTGCTCCTTGTAGTTTCAAAACGGGGCACAGTGTATGATGTTGTGCTG  
>HPV12\_Beta\_396910\_nt6341\_Genome\_Tile\_rc|1  
GGGCAAACACCATTTTTTCAGCTGGTGCATCCCCGCAGGGTAAGGCTTTCTCCCAGTGTCT  
>HPV12\_Beta\_396910\_nt6361\_Genome\_Tile\_rc|1  
TGTTCTTTAACTCTATGGGAGGGCAAACACCATTTTTTCAGCTGGTGCATCCCCGCAGGGTA  
>HPV12\_Beta\_396910\_nt6461\_Genome\_Tile\_rc|1  
TTCATATGTCAAGGCTGACATCAGATCTGTTTTGTTGCAATGTTTTAAAAATTCATGTTG  
>HPV12\_Beta\_396910\_nt6901\_Genome\_Tile\_rc|1  
AATCATAATTTGGAATGTCGTGTACATTTTGATTATCACTGTAAATAGATATACTGAAAT  
>HPV12\_Beta\_396910\_nt6921\_Genome\_Tile\_rc|1  
ATATTCTCTAAATTTTTGAGAATCATAATTTGGAATGTCGTGTACATTTTGATTATCACT  
>HPV12\_Beta\_396910\_nt7101\_Genome\_Tile\_rc|1  
AGATTCGATATATCTGTATGTGTCATGAATAGGATTGTCAGGAGTTGGCACGAAGCCTAA  
>HPV12\_Beta\_396910\_nt7201\_Genome\_Tile\_rc|1  
AAGAAAGTCTCTCAGTCATATCTACAGTCCAAAACTTAAGCCATCATAAGGGTCCGGCT  
>HPV12\_Beta\_396910\_nt7261\_Genome\_Tile\_rc|1  
TTTGTTGGAGGCCAGCCTGGAATAAGAACTTGCGCCCTAAGGAATACTGATCCAGGTCTA  
>HPV12\_Beta\_396910\_nt7321\_Genome\_Tile\_rc|1  
TTTTGGTCCCCCTTATGGAACTTCTATAGCTTGATGATTTTGTGTACCGTTAACGGTCG  
>HPV12\_Beta\_396910\_nt7381\_Genome\_Tile\_rc|1  
ATACTGTGCAAAAGTTGAGGTAATTGTACCAAATTCGGTACATTTAGTTTTTGC GTTTTC  
>HPV12\_Beta\_396910\_nt7581\_Genome\_Tile\_rc|1  
GCCAGAACTGAGCTGCTGTAAGCTATTTGGCAAACCAAAGGTCCTTTGGCGGTCGACCTA  
>HPV12\_Beta\_396910\_nt7601\_Genome\_Tile\_rc|1  
CGTTATCGGTCCACAAATGTGCCAGAACTGAGCTGCTGTAAGCTATTTGGCAAACCAAAG  
>HPV65\_Gamma\_312100\_nt0021\_Genome\_Tile\_rc|1  
TACAATGTGTCTTTTTATATGTATCTCTCCGGTTATATATTACTTTAGATGATGGTTGT  
>HPV65\_Gamma\_312100\_nt0241\_Genome\_Tile\_rc|1  
TTAAACGTAAGCATTGAGCAACAGCATGCATAGTAGCAACCCCCCTGAAAACATAACTAA  
>HPV65\_Gamma\_312100\_nt0321\_Genome\_Tile\_rc|1  
AATTTTCCTTTGAGCTACTTCTTCCAAATTAACAGCTTTTATAGAACTGAAAATAATT  
>HPV65\_Gamma\_312100\_nt0341\_Genome\_Tile\_rc|1  
CATCTGATGCAAATCTCCTTAATTTTCCTTTGAGCTACTTCTTCCAAATTAACAGCTTTT  
>HPV65\_Gamma\_312100\_nt0381\_Genome\_Tile\_rc|1  
TAATTTCTCAACAATGTCTAGTAGTCTCAAACAACATATACATCTGATGCAAATCTCCTT  
>HPV65\_Gamma\_312100\_nt0401\_Genome\_Tile\_rc|1  
TGGTCAGAGTACAGCAAGTCTAATTTCTCAACAATGTCTAGTAGTCTCAAACAACATATA  
>HPV65\_Gamma\_312100\_nt0701\_Genome\_Tile\_rc|1  
GTCCACTATGAGTTGTTCCAACGCTCGAAGTCCAAATTCACAGCAAACAGAGTAATCCT  
>HPV65\_Gamma\_312100\_nt1381\_Genome\_Tile\_rc|1  
TACAGTGCTGTTGCAAAACAATTTTAGAGCTTTCCAAAACCTCAACAGCAGCTCGAAAGA  
>HPV65\_Gamma\_312100\_nt1401\_Genome\_Tile\_rc|1  
TATTTTAACTTGAATATATGTACAGTGCTGTTGCAAAACAATTTTAGAGCTTTCCAAAAC  
>HPV65\_Gamma\_312100\_nt1541\_Genome\_Tile\_rc|1  
GTAGGCACACTTCGTAACCTTAGGAGGGTCAGTCAATATTTGAAACTCTTGAATATTCAAC  
>HPV65\_Gamma\_312100\_nt1561\_Genome\_Tile\_rc|1  
GCTTATAGAAGTATAAAGCTGTAGGCACACTTCGTAACCTTAGGAGGGTCAGTCAATATTT  
>HPV65\_Gamma\_312100\_nt2101\_Genome\_Tile\_rc|1  
CATAGGATACTACTTTACCTTTAAGAAATTTCACTAGAGAATAACAAAACAGAGATTTTC  
>HPV65\_Gamma\_312100\_nt2121\_Genome\_Tile\_rc|1  
GAAGTGGCTACTTCGATTACATAGGATACTACTTTACCTTTAAGAAATTTCACTAGAGA  
>HPV65\_Gamma\_312100\_nt2801\_Genome\_Tile\_rc|1  
GAGCAGTATTAATCAGTTCTGCACTAACTTCTGGCAGAGTCCAACGCTCTGATCCATAAG



>HPV65\_Gamma\_312100\_nt3541\_Genome\_Tile\_rc|1  
CATAAAGAGAAACCCACAGTTACTGGAATTTTGTTCCTATATCTCCAACATTTCAACGA  
>HPV65\_Gamma\_312100\_nt3561\_Genome\_Tile\_rc|1  
ACCCAGTTCCAAACAGTGCTCATAAAGAGAAACCCACAGTTACTGGAATTTTGTTCCTA  
>HPV65\_Gamma\_312100\_nt3621\_Genome\_Tile\_rc|1  
CTCTGACCAGGACTTTTTAAAAGCAATTAACATGCGACTGTGATTTTCTGACACATCACCA  
>HPV65\_Gamma\_312100\_nt3641\_Genome\_Tile\_rc|1  
TGTGTTTAAACAAATGAGTCTCTCTGACCAGGACTTTTAAAAGCAATTAACATGCGACTGT  
>HPV65\_Gamma\_312100\_nt3661\_Genome\_Tile\_rc|1  
ACAGAGTTTTGGGAATAGATTGTGTTTAAACAAATGAGTCTCTCTGACCAGGACTTTTAAA  
>HPV65\_Gamma\_312100\_nt3701\_Genome\_Tile\_rc|1  
TTGCATTTTATAAGCTATTTAAAGAACCATAGGTATATGTACAGAGTTTTGGGAATAGAT  
>HPV65\_Gamma\_312100\_nt3741\_Genome\_Tile\_rc|1  
AGAGGTTTGGTATTGAGTCTCTTTTGTCTGCGTGAGGCTTGCAATTTATAAGCTATTT  
>HPV65\_Gamma\_312100\_nt3761\_Genome\_Tile\_rc|1  
AGATAATTGACATTTTGCATAGAGGTTTGGTATTGAGTCTCTTTTGTCTGCGTGAGGC  
>HPV65\_Gamma\_312100\_nt3921\_Genome\_Tile\_rc|1  
TAGGGGCTCCCAAGTGATTATAACAGAACCCCTCCACTGCCTCTTCCCGTCCCAATTC  
>HPV65\_Gamma\_312100\_nt4041\_Genome\_Tile\_rc|1  
CTAAAGGAACACAGAAGAAGTCCAGGGTTTACAACATCTACAGGGATGATTTCACTAG  
>HPV65\_Gamma\_312100\_nt4061\_Genome\_Tile\_rc|1  
TTCTGGAAGTGTAAATCCTCTAAAGGAACACAGAAGAAGTCCAGGGTTTACAACATC  
>HPV65\_Gamma\_312100\_nt4101\_Genome\_Tile\_rc|1  
GAAGACCACCTCCTCCACCTCCCCGCTATCTATGGTGACTTCTGGAAGTGTAAATCCT  
>HPV65\_Gamma\_312100\_nt4141\_Genome\_Tile\_rc|1  
ATAGGGTCTGAGGAAGTGACAACATCTATCTCAGAAGGATGAAGACCACCTCCTCCACCC  
>HPV65\_Gamma\_312100\_nt4161\_Genome\_Tile\_rc|1  
TTGTACCAGTGACATCTGAAATAGGGTCTGAGGAAGTGACAACATCTATCTCAGAAGGAT  
>HPV65\_Gamma\_312100\_nt4261\_Genome\_Tile\_rc|1  
CTAGTTCTTAAAGCTATGCGTTTGGTAGGGGCTCTGTTGGAGAAACATCTAGGACTGCA  
>HPV65\_Gamma\_312100\_nt4301\_Genome\_Tile\_rc|1  
GCCTGATATTACACTTATATGTGGTGTTGATGTTGCGCCCTAGTTCTTAAAGCTATGCG  
>HPV65\_Gamma\_312100\_nt4501\_Genome\_Tile\_rc|1  
TTATAAAGATCTCGCGCTCTTTCCAAAGCACGTCCAATAGTCTCACGTGGTGTGCTAGTT  
>HPV65\_Gamma\_312100\_nt4541\_Genome\_Tile\_rc|1  
CATTGCTGGATTTCTAGTGGCTATCTGCTGCACTCTTCTGTTATAAAGATCTCGCGCTCT  
>HPV65\_Gamma\_312100\_nt5121\_Genome\_Tile\_rc|1  
GTATAACTCTTGTTCCTGGGTAAGATACAAATAAATCGGAGCCTACATCATCAACATAAA  
>HPV65\_Gamma\_312100\_nt5141\_Genome\_Tile\_rc|1  
AGTAGGTAAGCCTCCCGCAGGTATAACTCTTGTTCCTGGGTAAGATACAAATAAATCGGA  
>HPV65\_Gamma\_312100\_nt5161\_Genome\_Tile\_rc|1  
TCTAACGGGGTAAAAGGCTCAGTAGGTAAAGCCTCCCGCAGGTATAACTCTTGTTCCTGGG  
>HPV65\_Gamma\_312100\_nt5181\_Genome\_Tile\_rc|1  
ACTCTGAAAAAAATGGAGGCTCTAACGGGGTAAAAGGCTCAGTAGGTAAAGCCTCCCGCAG  
>HPV65\_Gamma\_312100\_nt5201\_Genome\_Tile\_rc|1  
TACAAAGTCAGAACTGTAAACTCTGAAAAAAATGGAGGCTCTAACGGGGTAAAAGGCTC  
>HPV65\_Gamma\_312100\_nt5221\_Genome\_Tile\_rc|1  
CGATACAAACTAGGACGATATACAAAGTCAGAACTGTAAACTCTGAAAAAAATGGAGGC  
>HPV65\_Gamma\_312100\_nt6861\_Genome\_Tile\_rc|1  
TAAGTTTCTATTGGCAGAACAATGCATTCTTATAAGGATTAATCTACTGTTTAATAGAC  
>HPV65\_Gamma\_312100\_nt6881\_Genome\_Tile\_rc|1  
ATATAATAATTGGCTCAGTTTAAAGTTTCTATTGGCAGAACAATGCATTCTTATAAGGAT  
>HPV65\_Gamma\_312100\_nt6921\_Genome\_Tile\_rc|1  
TCTCACAGAAAAAGCAAATACATACACGTTTCCAAAGATTATATAATAATTGGCTCAGTT  
>HPV65\_Gamma\_312100\_nt6941\_Genome\_Tile\_rc|1

CAGTTTATTTTACTCAAGTTTCTCACAGAAAAAGCAAATACATACACGTTTCCAAAGATT  
>HPV65\_Gamma\_312100\_nt7081\_Genome\_Tile\_rc|1  
AATTTTTTTAGAAAAATAGAAGGGGACGTTCTCTTTTGGCGCGCATCCGACGGATGTGGA  
>HPV65\_Gamma\_312100\_nt7121\_Genome\_Tile\_rc|1  
CGATAACGGTCTTACACAATTTTGCAGCTGCAGAAACGGTAATTTTTTTAGAAAAATAGAA  
>HPV65\_Gamma\_312100\_nt7141\_Genome\_Tile\_rc|1  
TGTGCCAAGGTTACAGGGAACGATAACGGTCTTACACAATTTTGCAGCTGCAGAAACGGT  
>HPV57\_Alpha\_60882\_nt1821\_Genome\_Tile\_rc|1  
GTACTGCACCATAACAGATAATTTGAACTGCTCATCCTCCATACTGTGTCTTATCAGTGT  
>HPV57\_Alpha\_60882\_nt1901\_Genome\_Tile\_rc|1  
GCCGCATTGGCGTCCACGTCCGCCAGCTGTGCGTACTCAAATGCCAGTGCGCTCTCGTCC  
>HPV57\_Alpha\_60882\_nt2361\_Genome\_Tile\_rc|1  
ATTGCCATCTAGTAGGTTCTAAGATATGTATCAATATACGTCCAGCACTGGGCCGTGCG  
>HPV57\_Alpha\_60882\_nt2381\_Genome\_Tile\_rc|1  
TTCCTGTCTATGCTGAAGGATTGCCATCTAGTAGGTTCTAAGATATGTATCAATATAC  
>HPV57\_Alpha\_60882\_nt3741\_Genome\_Tile\_rc|1  
TTCACCCCTTTGGGTAGATGGACCCCTTGTAAGGAATTCTGCACGCTGTTCTGACTTTTG  
>HPV57\_Alpha\_60882\_nt4081\_Genome\_Tile\_rc|1  
AGCAGGATACATTGCAGTATACAGGGGGGAGGTATATACAGGGTAGCAGCAGTTGGTCAC  
>HPV57\_Alpha\_60882\_nt4101\_Genome\_Tile\_rc|1  
CCGCCCCGTGCCCTTGTACACAGCAGGATACATTGCAGTATACAGGGGGGAGGTATATACA  
>HPV57\_Alpha\_60882\_nt4161\_Genome\_Tile\_rc|1  
AAAAGAATAATCAACAAGCAATCCACATCATCAGGGCCCCACAGGACAATGGGATACGAC  
>HPV57\_Alpha\_60882\_nt4181\_Genome\_Tile\_rc|1  
ACAACAAAAATGGCAATCAACAAAAGAATAATCAACAAGCAATCCACATCATCAGGGCCCC  
>HPV57\_Alpha\_60882\_nt4201\_Genome\_Tile\_rc|1  
CAGACGGACGTACAGCATCAACAACAAAATGGCAATCAACAAAAGAATAATCAACAAGCA  
>HPV57\_Alpha\_60882\_nt4221\_Genome\_Tile\_rc|1  
GAGTATGTACTACTGCAGCAGACGGACGTACAGCATCAACAACAAAATGGCAATCAAC  
>HPV57\_Alpha\_60882\_nt4241\_Genome\_Tile\_rc|1  
GTATGTAGCAAAAACACAATGAGTATGTACTACTGCAGCAGACGGACGTACAGCATCA  
>HPV57\_Alpha\_60882\_nt4281\_Genome\_Tile\_rc|1  
AGGCAATCAGGTGCACACCGATAAAAATGTATCAAAATGAGTATGTAGCAAAAACACAAT  
>HPV57\_Alpha\_60882\_nt4301\_Genome\_Tile\_rc|1  
ATTGACACGTAGCAATACAAAGGCAATCAGGTGCACACCGATAAAAATGTATCAAAATGA  
>HPV57\_Alpha\_60882\_nt4441\_Genome\_Tile\_rc|1  
ATCCTATCAGCTAATGTGTCCTGTTCCACCCTAGGTATGATATCAGGGGGGCACGTTCCA  
>HPV57\_Alpha\_60882\_nt4461\_Genome\_Tile\_rc|1  
CCAGGCTGCCCCATTTGAGTATCCTATCAGCTAATGTGTCCTGTTCCACCCTAGGTATGA  
>HPV57\_Alpha\_60882\_nt4601\_Genome\_Tile\_rc|1  
CACAGGTTCTATTACTACAGGTGGCCTTGGCGCCAGTCCTACATCAACGACAGTTGTTGG  
>HPV57\_Alpha\_60882\_nt4761\_Genome\_Tile\_rc|1  
CCCCATTACCCGAAGGAGTGATGTCCAGGACTGCAGGGTCAGTCACCGTTGAGGTGGTAA  
>HPV57\_Alpha\_60882\_nt5421\_Genome\_Tile\_rc|1  
CTCGAGGGGCGCGGGGACATCCGAATCTAAGGGTTGCAAGAAATCCGACTCGGCATATA  
>HPV57\_Alpha\_60882\_nt5441\_Genome\_Tile\_rc|1  
GTCTGCCAGGGAAAGGGTACCTCGAGGGGCGCGGGGACATCCGAATCTAAGGGTTGCAA  
>HPV57\_Alpha\_60882\_nt5601\_Genome\_Tile\_rc|1  
AGGATGGTATGGCTGGTATCACAGGCACCAGCGGTCCCATACCGGGCCTACAGACGGGT  
>HPV57\_Alpha\_60882\_nt6561\_Genome\_Tile\_rc|1  
AGTGGAGGTATAAACATAACTACCGGGGGTCTGGACGGTAGAACTCTTGACATATAGCTC  
>HPV57\_Alpha\_60882\_nt6761\_Genome\_Tile\_rc|1  
TCCTTATAAATTGGAGGCTTTATAATTAGTTTCTGTGGTTACAGTGGCACACAAAGAGACA  
>HPV57\_Alpha\_60882\_nt6981\_Genome\_Tile\_rc|1  
CTTAGGGGGTGTGGGCTTCTGACATGTTATCGCTTGGGATTGCAAATACCTGTAGGTGTC

>HPV57\_Alpha\_60882\_nt7181\_Genome\_Tile\_rc|1  
AATCACTATCGCCTGACCTTTTTGCGTTTAGCAGTGGGCGCCGCTGCAGTTGCAGCGGCG  
>HPV57\_Alpha\_60882\_nt7421\_Genome\_Tile\_rc|1  
GGGGCTACATACAGGCCACAGTGTGCAAACCATGCAGCGGGGACAATTACAGAGTGCAAC  
>HPV57\_Alpha\_60882\_nt7541\_Genome\_Tile\_rc|1  
TTTAGTTGGCACAGTAAAAAAGTGAAAGGATTAAAGCAATTAAAGGATTAAAGGATATGA  
>HPV57\_Alpha\_60882\_nt7561\_Genome\_Tile\_rc|1  
CAATCAAAAAGCAAAATCATTTTTAGTTGGCACAGTAAAAAAGTGAAAGGATTAAAGCAAT  
>HPV57\_Alpha\_60882\_nt7601\_Genome\_Tile\_rc|1  
GCACTGGAAAAAGAAAACTGCATTAATGCAGACACAAAACAATCAAAAAGCAAAATCAT  
>HPV94\_Alpha\_40804528\_nt3881\_Genome\_Tile\_rc|1  
TCCAGGATAATACACTGTCACAATACAGACAATTAGAAGATTGACATATAACCCAAAATT  
>HPV94\_Alpha\_40804528\_nt3901\_Genome\_Tile\_rc|1  
GTAGTCTACACAAATAAAAATCCAGGATAATACACTGTCACAATACAGACAATTAGAAGA  
>HPV94\_Alpha\_40804528\_nt4061\_Genome\_Tile\_rc|1  
TGTGAGACCTATGTGTTTTGAAGTATACGTGACACAATTTGAAAATACAATGCTACCAGG  
>HPV94\_Alpha\_40804528\_nt4181\_Genome\_Tile\_rc|1  
TAAAACAAACAATGCCATAAGTACAAACAATATTATACACAGCAGTAAATACACATCTCC  
>HPV94\_Alpha\_40804528\_nt4201\_Genome\_Tile\_rc|1  
AATACACCCAGGTGTCTATATAAAACAACAATGCCATAAGTACAAACAATATTATACAC  
>HPV94\_Alpha\_40804528\_nt4221\_Genome\_Tile\_rc|1  
GGCGTCTACATCCATATCACAATACACCCAGGTGTCTATATAAAACAACAATGCCATAA  
>HPV94\_Alpha\_40804528\_nt4241\_Genome\_Tile\_rc|1  
AAAACATTAGATTATGCACAGGCGTCTACATCCATATCACAATACACCCAGGTGTCTATA  
>HPV94\_Alpha\_40804528\_nt4261\_Genome\_Tile\_rc|1  
CACATAAGGGTACACACAGCAAAACATTAGATTATGCACAGGCGTCTACATCCATATCAC  
>HPV94\_Alpha\_40804528\_nt4301\_Genome\_Tile\_rc|1  
AAAAAACAAAAGAATAAAAAAACAAGGGTGCTACAATAGCACATAAGGGTACACACAGC  
>HPV94\_Alpha\_40804528\_nt5461\_Genome\_Tile\_rc|1  
AAGCAGTACTATAGCTCCGTGCCGGTGTGACACTTCGAGTGCCATTTGTAAAGGCAACAT  
>HPV94\_Alpha\_40804528\_nt5481\_Genome\_Tile\_rc|1  
AAGTGTAGAGGACAAAGGGGAAGCAGTACTATAGCTCCGTGCCGGTGTGACACTTCGAGT  
>HPV94\_Alpha\_40804528\_nt6541\_Genome\_Tile\_rc|1  
TATTAGAGTGTGAGGAATGGTGTCTCCCACTGCACTGGCTCTATTGAAAAAATGTCTTGC  
>HPV94\_Alpha\_40804528\_nt6561\_Genome\_Tile\_rc|1  
TCACCACCGGCCGACTTCAATATTAGAGTGTGAGGAATGGTGTCTCCCACTGCACTGGCT  
>HPV94\_Alpha\_40804528\_nt7281\_Genome\_Tile\_rc|1  
CCAGACAAACAACATACACAAATATGCACATACATAAAAACACAAACATGGGGTCATTTT  
>HPV94\_Alpha\_40804528\_nt7321\_Genome\_Tile\_rc|1  
AGTAAATACATACAAGCGTACACATAACATACACCAATTACCAGACAAACAACATACACA  
>HPV94\_Alpha\_40804528\_nt7341\_Genome\_Tile\_rc|1  
TTCCAGTACAATACATACACAGTAAATACATACAAGCGTACACATAACATACACCAATTA  
>HPV94\_Alpha\_40804528\_nt7361\_Genome\_Tile\_rc|1  
TTTACACATCCACACATGCATTCCAGTACAATACATACACAGTAAATACATACAAGCGTA  
>HPV94\_Alpha\_40804528\_nt7821\_Genome\_Tile\_rc|1  
AGTTTATAATTATAGTTGGAAAGAGACGTGTAGCAACTGCATTAATTAAAGCTAGAAAGC  
>HPV95\_Gamma\_40804520\_nt0001\_Genome\_Tile\_rc|1  
CCGGTGATATTTTATTATAAGAGATGATTGTTGCCAACTATTATTAAGGAAAACAATGTT  
>HPV95\_Gamma\_40804520\_nt0221\_Genome\_Tile\_rc|1  
TAATAACAGCTACCCCTAAAAACCAAACCTAATTTCTTAATATAAAACGAAGCAAGCTCT  
>HPV95\_Gamma\_40804520\_nt0341\_Genome\_Tile\_rc|1  
CATATATCCCTGATTTTTTTGTCCTACTAAATCTTCCAGTCCAGTAGCATATACAGAACAC  
>HPV95\_Gamma\_40804520\_nt0361\_Genome\_Tile\_rc|1  
GACAGCATAAACATCTTACACATATATCCCTGATTTTTTTGTCCTACTAAATCTTCCAGTC  
>HPV95\_Gamma\_40804520\_nt0401\_Genome\_Tile\_rc|1

TATAACAGGTCAAGTTTTTCTACTATGTCTAATAGTTTAAAGACAGCATAAACATCTTACA  
>HPV95\_Gamma\_40804520\_nt0421\_Genome\_Tile\_rc|1  
AATAGCACACCTCACCCTGTATAACAGGTCAAGTTTTTCTACTATGTCTAATAGTTTAA  
>HPV95\_Gamma\_40804520\_nt0541\_Genome\_Tile\_rc|1  
AAATTTGCAGGAACAATACTCATGGAGGTTTAAATCAACATCTGCAATAGATGGTGCT  
>HPV95\_Gamma\_40804520\_nt0561\_Genome\_Tile\_rc|1  
GCAAGACCTCATCGCTCAGCAAATTTGCAGGAACAATACTCATGGAGGTTTAAATCAA  
>HPV95\_Gamma\_40804520\_nt0681\_Genome\_Tile\_rc|1  
GTCCAAATGCAACAGCATACAAAGTGATTCTTACATTTGCTTCACAATTATAACAACAGG  
>HPV95\_Gamma\_40804520\_nt0901\_Genome\_Tile\_rc|1  
AATTTGATATATTTGAACCGTCAGTACTTTCGTCTGAATAACTCATCCACAGTATCTATGC  
>HPV95\_Gamma\_40804520\_nt1241\_Genome\_Tile\_rc|1  
GTTGCCCTTCGGTTATTGTCCTGCAATAACAAAAGGTTAATATCCCCTGCGCCATCTTGA  
>HPV95\_Gamma\_40804520\_nt1261\_Genome\_Tile\_rc|1  
CTTTAAATTTGGCAAGCATAGTTGCCCTTCGGTTATTGTCCTGCAATAACAAAAGGTTAA  
>HPV95\_Gamma\_40804520\_nt1381\_Genome\_Tile\_rc|1  
TCTTAGAACTTTCGAATACCTCTACAGGAGCTTTAAATATAACAACAACCAATTATCAC  
>HPV95\_Gamma\_40804520\_nt1401\_Genome\_Tile\_rc|1  
GCAATGCTGTTGAAGGACGATCTTAGAACTTTCGAATACCTCTACAGGAGCTTTAAATAT  
>HPV95\_Gamma\_40804520\_nt1421\_Genome\_Tile\_rc|1  
ATCTTTACTTGAATGTATTGGCAATGCTGTTGAAGGACGATCTTAGAACTTTCGAATACC  
>HPV95\_Gamma\_40804520\_nt1441\_Genome\_Tile\_rc|1  
AAAGAGCAGAAAATCCAAATATCTTTACTTGAATGTATTGGCAATGCTGTTGAAGGACGA  
>HPV95\_Gamma\_40804520\_nt1461\_Genome\_Tile\_rc|1  
ACTCTTAAATTTGAATAAATAAAGAGCAGAAAATCCAAATATCTTTACTTGAATGTATTG  
>HPV95\_Gamma\_40804520\_nt1501\_Genome\_Tile\_rc|1  
ACGAACATAATAACTTATAAACAGTCTCTCTACTTTTGGAACTCTTAAATTTGAATAAAT  
>HPV95\_Gamma\_40804520\_nt1521\_Genome\_Tile\_rc|1  
AAACTCTTGTATATTTAACAACGAACATAATAACTTATAAACAGTCTCTCTACTTTTGGAA  
>HPV95\_Gamma\_40804520\_nt1661\_Genome\_Tile\_rc|1  
GACTGATGGCTCACTATTGTCTGCTTAGCGATCCAATCCGGTGTGTTGTCCATATACAAAG  
>HPV95\_Gamma\_40804520\_nt1701\_Genome\_Tile\_rc|1  
AACCATTCTTGACAACCTCAAATGTTTCTGCAGTTGTAGCAGACTGATGGCTCACTATTGT  
>HPV95\_Gamma\_40804520\_nt2141\_Genome\_Tile\_rc|1  
AATTGACTAGTTCTATTACATATGACACTACTTTTCCCCTTAAAACTTTATCAATGAG  
>HPV95\_Gamma\_40804520\_nt2701\_Genome\_Tile\_rc|1  
ACTTGCTAAAAGTGAAGGAAGGGGTTGAAGACCCAATTTAGTCAGCCCTTGTTCGTGC  
>HPV95\_Gamma\_40804520\_nt2741\_Genome\_Tile\_rc|1  
ATGTTAGCTGTATCTGTATTGCTTGTGTTTGCATTGTATTCACTTGCTAAAAGTGAAGGAA  
>HPV95\_Gamma\_40804520\_nt2781\_Genome\_Tile\_rc|1  
CAAGGTTTCAGAAGCATAGGGCGACTTTAATAATGATAGTAATGTTAGCTGTATCTGTATT  
>HPV95\_Gamma\_40804520\_nt2801\_Genome\_Tile\_rc|1  
CACTGACTTCTGGTAATGTCCAAGGTTTCAGAAGCATAGGGCGACTTTAATAATGATAGTA  
>HPV95\_Gamma\_40804520\_nt2821\_Genome\_Tile\_rc|1  
GGGCGTGTAAATCAATTCTGCACTGACTTCTGGTAATGTCCAAGGTTTCAGAAGCATAGGG  
>HPV95\_Gamma\_40804520\_nt2841\_Genome\_Tile\_rc|1  
TTTTTTTAAAACGTTCTGAGGGGGCGTGTAAATCAATTCTGCACTGACTTCTGGTAATGTC  
>HPV95\_Gamma\_40804520\_nt2861\_Genome\_Tile\_rc|1  
CAGTTACATCATACCCCCCTTTTTTAAACGTTCTGAGGGGGCGTGTAAATCAATTCTG  
>HPV95\_Gamma\_40804520\_nt2941\_Genome\_Tile\_rc|1  
TATTTTCATTTGCATCTTGATAATACAAAGCAGTCCAGTTTGTATATACCATTGTATTGTT  
>HPV95\_Gamma\_40804520\_nt3221\_Genome\_Tile\_rc|1  
CCCTCGACTGCGATCCCCTTCCCCGAGGGGACGTCTGCTTGGTAGTTTGGTGTGCTGG  
>HPV95\_Gamma\_40804520\_nt3561\_Genome\_Tile\_rc|1  
CTCATATAAAGGAAGCCACAAGAATTTGAAGTTAGTTTCTATATCTCCAGCATTTCAAT

>HPV95\_Gamma\_40804520\_nt3641\_Genome\_Tile\_rc|1  
CTCTCTGGTCTGTACTGGTGAAAGCTATTAACATTCGACTATGATTTTCTGAGGAATCCC  
>HPV95\_Gamma\_40804520\_nt3661\_Genome\_Tile\_rc|1  
GTGATGCTTTACAAAGTAATCTCTCTGGTCTGTACTGGTGAAAGCTATTAACATTCGACT  
>HPV95\_Gamma\_40804520\_nt3701\_Genome\_Tile\_rc|1  
TCAGAGAACCAAATGTATATGTGCACTGTCTGGGGAAGAAGTGATGCTTTACAAAGTAAT  
>HPV95\_Gamma\_40804520\_nt3741\_Genome\_Tile\_rc|1  
CTCGCTTTACTCTCCGTGCAGAATTCATTTTACAGGCTGTTTCAGAGAACCAAATGTATAT  
>HPV95\_Gamma\_40804520\_nt3761\_Genome\_Tile\_rc|1  
ATAAAGATTAGGGACTGAGTCTCGCTTTACTCTCCGTGCAGAATTCATTTTACAGGCTGT  
>HPV95\_Gamma\_40804520\_nt3781\_Genome\_Tile\_rc|1  
CCTGAAAGTTGACATTTTGCATAAAGATTAGGGACTGAGTCTCGCTTTACTCTCCGTGCA  
>HPV95\_Gamma\_40804520\_nt3981\_Genome\_Tile\_rc|1  
GAACTGTGGGTCTTACTAGAGTTCCACTAGGGGTAACCTTACTTGGGGTCGCTAGTGGAT  
>HPV95\_Gamma\_40804520\_nt4041\_Genome\_Tile\_rc|1  
AGCCTGCAGGATCTACTGCATCAACAGGAACCTATTTCAACGGGGCCCAGACCTTCTACTG  
>HPV95\_Gamma\_40804520\_nt4061\_Genome\_Tile\_rc|1  
AGTGAGCGGGACAATGGAGGAGCCTGCAGGATCTACTGCATCAACAGGAACCTATTTCAAC  
>HPV95\_Gamma\_40804520\_nt4081\_Genome\_Tile\_rc|1  
ACCTCGGGAACAGACACATCAGTGAGCGGGACAATGGAGGAGCCTGCAGGATCTACTGCA  
>HPV95\_Gamma\_40804520\_nt4101\_Genome\_Tile\_rc|1  
CACCTTCGCCATCCACAACCACCTCGGGAACAGACACATCAGTGAGCGGGACAATGGAGG  
>HPV95\_Gamma\_40804520\_nt4121\_Genome\_Tile\_rc|1  
TGGTCCTAAATCTATTGCCACCTTCGCCATCCACAACCACCTCGGGAACAGACACATC  
>HPV95\_Gamma\_40804520\_nt4141\_Genome\_Tile\_rc|1  
GTGACTCCTGTATCTTCGGGTGGTCTAAATCTATTGCCACCTTCGCCATCCACAACC  
>HPV95\_Gamma\_40804520\_nt4161\_Genome\_Tile\_rc|1  
ATATTTTCAGGAGGGCGAGATGTGACTCCTGTATCTTCGGGTGGTCTAAATCTATTGCC  
>HPV95\_Gamma\_40804520\_nt4241\_Genome\_Tile\_rc|1  
TATTGTGTATCTTCTCCTGAAATTATTGTTGGGTGGCTGTTGGTACCTGAAACATCTGA  
>HPV95\_Gamma\_40804520\_nt4281\_Genome\_Tile\_rc|1  
GTTTTGTGGGGGCTCTATTGGAGATATGTCTAACACAGCTATTGTGTTATCTTCTCCTG  
>HPV95\_Gamma\_40804520\_nt4301\_Genome\_Tile\_rc|1  
ACGTGTGCCCAAGGCTATACGTTTTGTGGGGGGCTCTATTGGAGATATGTCTAACACAGC  
>HPV95\_Gamma\_40804520\_nt4321\_Genome\_Tile\_rc|1  
TGTGGCGTTGATGACTGGCCACGTGTGCCCAAGGCTATACGTTTTGTGGGGGGCTCTATT  
>HPV95\_Gamma\_40804520\_nt4461\_Genome\_Tile\_rc|1  
CAAATTCCTGGATAGTGTTTCAGATCCTGCAAGGGGATTTCTCTGTATAACCAATAGAAT  
>HPV95\_Gamma\_40804520\_nt4561\_Genome\_Tile\_rc|1  
TGAATTTGTTGCACTCTTCTATTATATAATTCTCGCGCCCTCCCTATTGCGCGGGCTATT  
>HPV95\_Gamma\_40804520\_nt4761\_Genome\_Tile\_rc|1  
CACGAATTTGTCCACTCTCTGTTTCTGAAAATTGTGGGCGACCTATTGTGACAATGTCAG  
>HPV95\_Gamma\_40804520\_nt4801\_Genome\_Tile\_rc|1  
CTTCTAGTCTGTATGGTGCCCTGCGTCCTAATCTACTAACACGAATTTGTCCACTCTCT  
>HPV95\_Gamma\_40804520\_nt4821\_Genome\_Tile\_rc|1  
CTTGACCAATTTGTATACCACTTCTAGTCTGTATGGTGCCCTGCGTCCTAATCTACTAA  
>HPV95\_Gamma\_40804520\_nt4841\_Genome\_Tile\_rc|1  
ATCATAATAGAAATGTAAGTCTTGACCAATTTGTATACCACTTCTAGTCTGTATGGTGCC  
>HPV95\_Gamma\_40804520\_nt4861\_Genome\_Tile\_rc|1  
GCTGTATCAATGGTGCTTAAATCATAATAGAAATGTACTGCTTGACCAATTTGTATACCA  
>HPV95\_Gamma\_40804520\_nt4881\_Genome\_Tile\_rc|1  
TAGACAATTCATTTGCATCTGCTGTATCAATGGTGCTTAAATCATAATAGAAATGTACTG  
>HPV95\_Gamma\_40804520\_nt4901\_Genome\_Tile\_rc|1  
TCCTGAATGTTGCTTAAAGTAGACAATTCATTTGCATCTGCTGTATCAATGGTGCTTAA  
>HPV95\_Gamma\_40804520\_nt4921\_Genome\_Tile\_rc|1

GCATCTACGATACTCTGGTCTCCTGAATGTTGTCCTAAAGTAGACAATTCTATTGCATCT  
>HPV95\_Gamma\_40804520\_nt4941\_Genome\_Tile\_rc|1  
TCAAGCTACTTTCTGCCATTGCATCTACGATACTCTGGTCTCCTGAATGTTGTCCTAAAG  
>HPV95\_Gamma\_40804520\_nt4961\_Genome\_Tile\_rc|1  
AGGTGTAGCGAAAGGATCTATCAAGCTACTTTCTGCCATTGCATCTACGATACTCTGGTC  
>HPV95\_Gamma\_40804520\_nt5021\_Genome\_Tile\_rc|1  
ATTACTAAAAATCCTCAGTTTGAGGATCCAATAATTGCTGTTCTCTGCAACAGTGGTATC  
>HPV95\_Gamma\_40804520\_nt5041\_Genome\_Tile\_rc|1  
GTAGTTAGTACTAAATGAGAATTACTAAAAATCCTCAGTTTGAGGATCCAATAATTGCTGT  
>HPV95\_Gamma\_40804520\_nt5061\_Genome\_Tile\_rc|1  
AAGTTGAACCTCTGTTACTAGTAGTTAGTACTAAATGAGAATTACTAAAAATCCTCAGTTT  
>HPV95\_Gamma\_40804520\_nt5081\_Genome\_Tile\_rc|1  
AGGAATAGTAGGAATAGTCAAAGTTGAACCTCTGTTACTAGTAGTTAGTACTAAATGAGA  
>HPV95\_Gamma\_40804520\_nt5101\_Genome\_Tile\_rc|1  
ATTCGTAGACCAATTCCTGGAGGAATAGTAGGAATAGTCAAAGTTGAACCTCTGTTACTA  
>HPV95\_Gamma\_40804520\_nt5121\_Genome\_Tile\_rc|1  
AACCAATATCATCTACATAAATTCGTAGACCAATTCCTGGAGGAATAGTAGGAATAGTCA  
>HPV95\_Gamma\_40804520\_nt5201\_Genome\_Tile\_rc|1  
CTTCAGAGGGAAAAATGGTTTCAGTTGGTAATCCTCCAGGAGGAATTAAGCTTGATTCTGG  
>HPV95\_Gamma\_40804520\_nt5241\_Genome\_Tile\_rc|1  
AATAAGTGAAATCACTGTAAAAATCTGTTAATAATGCTGGCTTCAGAGGGAAAAATGGTT  
>HPV95\_Gamma\_40804520\_nt5261\_Genome\_Tile\_rc|1  
TTTGCGATATAAGCTAGGATAATAAGTGAAATCACTGTAAAAATCTGTTAATAATGCTGG  
>HPV95\_Gamma\_40804520\_nt5281\_Genome\_Tile\_rc|1  
AGATCTGATCGTTTTTCGTTTTTTGCGATATAAGCTAGGATAATAAGTGAAATCACTGTAA  
>HPV95\_Gamma\_40804520\_nt5301\_Genome\_Tile\_rc|1  
TAAAAAAACAAAGTCAGAACAGATCTGATCGTTTTTCGTTTTTTGCGATATAAGCTAGGAT  
>HPV95\_Gamma\_40804520\_nt5321\_Genome\_Tile\_rc|1  
ACCAACTCGTCATTTTTCTGTAAAAAAACAAAGTCAGAACAGATCTGATCGTTTTTCGTTT  
>HPV95\_Gamma\_40804520\_nt5541\_Genome\_Tile\_rc|1  
TGAAACCTAAAGACTCTATATTGACTTCCAGATACCTTTGGAACATAAACTTTCTTAGGT  
>HPV95\_Gamma\_40804520\_nt5801\_Genome\_Tile\_rc|1  
CTGGAATACAACCAATTATGAACATTTGGGTCTGTTTAGGGTCTAATGAGACATCCTGTC  
>HPV95\_Gamma\_40804520\_nt5841\_Genome\_Tile\_rc|1  
TCTCTGCATGCCTCAGCTTTATCCAGTGCTCCCAATAGCTGGAATACAACCAATTATG  
>HPV95\_Gamma\_40804520\_nt6021\_Genome\_Tile\_rc|1  
ATCTTTAAGAAAGTCAGGCCATTTACACAAAGTACCAACTACATCTAATGGTGCACCTGGAT  
>HPV95\_Gamma\_40804520\_nt6041\_Genome\_Tile\_rc|1  
CACCATAAATGTCCTTACTCATCTTTAAGAAGTCAGGCCATTTACACAAAGTACCAACTA  
>HPV95\_Gamma\_40804520\_nt6081\_Genome\_Tile\_rc|1  
GCATAAAGCTGTTCCCTTCGGCCAAAGAATAAACTGTCACCATAAATGTCCTTACTC  
>HPV95\_Gamma\_40804520\_nt6101\_Genome\_Tile\_rc|1  
CTCTAACAAAAAAGTGTCTTGACATAAAGCTGTTCCCTTCGGCCAAAGAATAAACTGT  
>HPV95\_Gamma\_40804520\_nt6161\_Genome\_Tile\_rc|1  
CAATTATGTAATCAGACTTCACTTCAAAAGGCTCTGGTAACGCATCACCCATTGTCCCAG  
>HPV95\_Gamma\_40804520\_nt6181\_Genome\_Tile\_rc|1  
TTCTTGGTTACTCTGAGCAGCAATTATGTAATCAGACTTCACTTCAAAAGGCTCTGGTAA  
>HPV95\_Gamma\_40804520\_nt6201\_Genome\_Tile\_rc|1  
TGAGGGCCAAGATTATTTTGTCTTGGTTACTCTGAGCAGCAATTATGTAATCAGACTTC  
>HPV95\_Gamma\_40804520\_nt6221\_Genome\_Tile\_rc|1  
TAGGAGTTCCAAAATAAATGTGAGGGCCAAGATTATTTTGTCTTGGTTACTCTGAGCAG  
>HPV95\_Gamma\_40804520\_nt6241\_Genome\_Tile\_rc|1  
ACTTGATACAAGAGAACCGCTAGGAGTTCCAAAATAAATGTGAGGGCCAAGATTATTTTG  
>HPV95\_Gamma\_40804520\_nt6261\_Genome\_Tile\_rc|1  
CGGTTAAAAAGCTGAGATTCACTTGATACAAGAGAACCGCTAGGAGTTCCAAAATAAATG

>HPV95\_Gamma\_40804520\_nt6361\_Genome\_Tile\_rc|1  
AAAGTTAGTGTATGGGTATTATCAACCAGAGTTACAAAAAGCTGATTATCCCAACAAAT  
>HPV95\_Gamma\_40804520\_nt6381\_Genome\_Tile\_rc|1  
TCATGCTTTACAGAAATAGTAAAGTTAGTGTATGGGTATTATCAACCAGAGTTACAAAA  
>HPV95\_Gamma\_40804520\_nt6401\_Genome\_Tile\_rc|1  
TATAATTGTTATCCTCTCCTTCATGCTTTACAGAAATAGTAAAGTTAGTGTATGGGTAT  
>HPV95\_Gamma\_40804520\_nt6421\_Genome\_Tile\_rc|1  
AAAATCATTTGCTTTATATGTATAATTGTTATCCTCTCCTTCATGCTTTACAGAAATAGT  
>HPV95\_Gamma\_40804520\_nt6541\_Genome\_Tile\_rc|1  
ATCTAATATATTTGGGTTCATGACATTCAAATGAGCCATTACATCTGCTGTAAGAGGCAC  
>HPV95\_Gamma\_40804520\_nt6641\_Genome\_Tile\_rc|1  
GTGGATTTTGAGTTGGACAACGAGTAGCTCTGGATGTAATGAATCTGTATTGATCCTCAA  
>HPV95\_Gamma\_40804520\_nt6661\_Genome\_Tile\_rc|1  
AGGGTCTTCTCTTCTGCTGGTGGATTTGAGTTGGACAACGAGTAGCTCTGGATGTAAT  
>HPV95\_Gamma\_40804520\_nt6681\_Genome\_Tile\_rc|1  
CAAAAGGACAAATCTTTAAAAGGGTCTTCTCTTCTGCTGGTGGATTTGAGTTGGACAA  
>HPV95\_Gamma\_40804520\_nt6721\_Genome\_Tile\_rc|1  
GCTTAATTCTGAAGAAAAACGCTCAGAAAGATCAACTGTCCAAAAGGACAAATCTTTAAA  
>HPV95\_Gamma\_40804520\_nt6801\_Genome\_Tile\_rc|1  
GAAGTAATAGCTCTTTGTCTTTTACGAGATCCATTTATTAATCCACTCTGATAGAGAAAC  
>HPV95\_Gamma\_40804520\_nt6901\_Genome\_Tile\_rc|1  
CTTTTTCTGCGCAGAAATAATACATTCCATTATGTATTTACATGGTTACTTAGATAAACG  
>HPV95\_Gamma\_40804520\_nt6921\_Genome\_Tile\_rc|1  
AATAATTGGCTCAATATGCACTTTTTCTGCGCAGAAATAATACATTCCATTATGTATTTA  
>HPV95\_Gamma\_40804520\_nt6941\_Genome\_Tile\_rc|1  
TATCCTTCAATAGGTTATATAATAATTGGCTCAATATGCACTTTTTCTGCGCAGAAATAA  
>HPV95\_Gamma\_40804520\_nt6981\_Genome\_Tile\_rc|1  
TATAGTTTATATGCATTCACATTTAAAAGATTTATAATTTTTATCCTTCAATAGGTTATAT  
>HPV95\_Gamma\_40804520\_nt7001\_Genome\_Tile\_rc|1  
GACACAATAGTAATTGGAGGTATAGTTTATATGCATTCACATTTAAAAGATTTATAATTTT  
>HPV95\_Gamma\_40804520\_nt7061\_Genome\_Tile\_rc|1  
GAGGCAGTCCAAGTAATCAGGGTGCGGACACAATATTGACCACATGAGTCACAAAGCATG  
>HPV95\_Gamma\_40804520\_nt7081\_Genome\_Tile\_rc|1  
CCAGCGTCTTACTTAATGTGGAGGCAGTCCAAGTAATCAGGGTGCGGACACAATATTGAC  
>HPV95\_Gamma\_40804520\_nt7101\_Genome\_Tile\_rc|1  
AGGAGCGTCTCTTTTCTTCGCCAGCGTCTTACTTAATGTGGAGGCAGTCCAAGTAATCAG  
>HPV95\_Gamma\_40804520\_nt7121\_Genome\_Tile\_rc|1  
TATTTTTTTCCAAAAAAATAAGGAGCGTCTCTTTTCTTCGCCAGCGTCTTACTTAATGTG  
>HPV95\_Gamma\_40804520\_nt7181\_Genome\_Tile\_rc|1  
AACTCCTGGAAATAGCGAACGAATCCGGTCCTGTTTCCCGCCTAATAATGCCAAATTCAA  
>HPV95\_Gamma\_40804520\_nt7201\_Genome\_Tile\_rc|1  
TAAAACTTTACCTACCTTTAACTCCTGGAAATAGCGAACGAATCCGGTCCTGTTTCCCG  
>HPV81\_Alpha\_40804509\_nt0101\_Genome\_Tile\_rc|1  
AGCAAAAACAAATTGGTAGGATTTGCTGGCCCCAGCGACATCACTGCTGTGCTGACCATA  
>HPV81\_Alpha\_40804509\_nt0441\_Genome\_Tile\_rc|1  
TATTTTATGAAAGTGGATTAGGCCTGTCACAAGATACTCCTTTTCTTGGTATGTTAACGG  
>HPV81\_Alpha\_40804509\_nt0921\_Genome\_Tile\_rc|1  
GCACTATCTTCTTCTTCACTTGGATTCTTGATACCTGTGGTCTTTTCTTCTACAACAGCC  
>HPV81\_Alpha\_40804509\_nt0941\_Genome\_Tile\_rc|1  
CTAGATCCTCTCCTGTATCTGCACTATCTCCTCTTTCATCACTTGATTCTGATACCTG  
>HPV81\_Alpha\_40804509\_nt0961\_Genome\_Tile\_rc|1  
TCGTGTATCTATGAAATCTACTAGATCCTCTCCTGTATCTGCACTATCTTCTCTTCATC  
>HPV81\_Alpha\_40804509\_nt1381\_Genome\_Tile\_rc|1  
TCTGGCCTTCAACAGCTCTACTATACTTGCTGTACCTTCTGGGTTTGTGTAAATGCAC  
>HPV81\_Alpha\_40804509\_nt2301\_Genome\_Tile\_rc|1

AAATGACTTGATGCATTTACGTAGGAAATAACTGCACCCCCTAGAAATTGCACTAAACTC  
>HPV81\_Alpha\_40804509\_nt2421\_Genome\_Tile\_rc|1  
TCCATACTTATTAAGTTACCATCTACCACACTACGTAAATGTGTATCTATGTACACCCAA  
>HPV81\_Alpha\_40804509\_nt2441\_Genome\_Tile\_rc|1  
CTAAATTCCTATGTTTTCTGTCCATACTTATTAAGTTACCATCTACCACACTACGTAAAT  
>HPV81\_Alpha\_40804509\_nt2481\_Genome\_Tile\_rc|1  
ATGTTAGTTGTAATCAGTAATGGGGGGCATTTTAGTTGTGCTAAATTCCTATGTTTTCTG  
>HPV81\_Alpha\_40804509\_nt2501\_Genome\_Tile\_rc|1  
TAACGTCTTCTAATGGATTTATGTTAGTTGTAATCAGTAATGGGGGGCATTTTAGTTGTG  
>HPV81\_Alpha\_40804509\_nt2521\_Genome\_Tile\_rc|1  
ACTATGTAAATATTTTAGGGTAACGTCTTCTAATGGATTTATGTTAGTTGTAATCAGTAA  
>HPV81\_Alpha\_40804509\_nt2541\_Genome\_Tile\_rc|1  
AAGCTAAACACTGCCATTCTACTATGTAAATATTTTAGGGTAACGTCTTCTAATGGATTT  
>HPV81\_Alpha\_40804509\_nt3521\_Genome\_Tile\_rc|1  
GTAACCGTCGGCCCTGATTTGTTATTGTCCACCCAGATGTTCCGGTGGTGCAGTGTCCGG  
>HPV81\_Alpha\_40804509\_nt3741\_Genome\_Tile\_rc|1  
CACGTTGGTCTTCATTAGCATACCATATTGTTACAAATGCACACTTTTTCGTTGCCTCTC  
>HPV81\_Alpha\_40804509\_nt3821\_Genome\_Tile\_rc|1  
ATGTTTTTACAAACACATAGACATAAAGCCCTGCATGGCTTGTATGCCCTTTGGTATTGT  
>HPV81\_Alpha\_40804509\_nt3881\_Genome\_Tile\_rc|1  
TTTCACTATACCATTTACCATATACATATGTATGTTACAGTACACATTTATACACAAAT  
>HPV81\_Alpha\_40804509\_nt3901\_Genome\_Tile\_rc|1  
AATACAGCAAGAACAATAAGTTTCACTATACCATTTACCATATACATATGTATGTTACA  
>HPV81\_Alpha\_40804509\_nt4221\_Genome\_Tile\_rc|1  
CCAGTATGGGTGCGGACCATAACAGGATACATACTAATACTACCTATATACACTGTAGCAGC  
>HPV81\_Alpha\_40804509\_nt4261\_Genome\_Tile\_rc|1  
CCCCTATTATCCATGTCAAACACCACTATATCTGTGCCCCAGTATGGGTGCGGACCAT  
>HPV81\_Alpha\_40804509\_nt4281\_Genome\_Tile\_rc|1  
ATACACAACAAAAACCATAACCCACTATTATCCATGTCAAACACCACTATATCTGTGCCC  
>HPV81\_Alpha\_40804509\_nt4341\_Genome\_Tile\_rc|1  
ACAATGTGCAGTTACAGTTGTAACAGTTTATACACTACAAAAAGTATTAAGGCAAGTATA  
>HPV81\_Alpha\_40804509\_nt4361\_Genome\_Tile\_rc|1  
TAGCAAAATTATAGTACAAAACAATGTGCAGTTACAGTTGTAACAGTTTATACACTACAA  
>HPV81\_Alpha\_40804509\_nt4421\_Genome\_Tile\_rc|1  
GGTGCATACCTTTGGCATGGTATACAATAGAGTATACAATGTATTTATTAATAAATATG  
>HPV81\_Alpha\_40804509\_nt4661\_Genome\_Tile\_rc|1  
ACACAGGACCTATATCAACTACAGAAGGGGGACGGCCACCTATAGGGATGTAGCCCGTGC  
>HPV81\_Alpha\_40804509\_nt4881\_Genome\_Tile\_rc|1  
GGATTTAAAAAGTTAGTGCTACTAACCTGCACTGTAGTACCTGTGGGAGTAATATCTAGG  
>HPV81\_Alpha\_40804509\_nt5541\_Genome\_Tile\_rc|1  
GAAACAGAGGACCTGGAAGACAAAGAGGGGCACAGACTGCAAAACAGCATCTAAATGTTGG  
>HPV81\_Alpha\_40804509\_nt5601\_Genome\_Tile\_rc|1  
AAAGGAACGGTGGTATTATATGAGGAGGCCACAGAGGTAGCAGATAAAGTGGCAGAGCCT  
>HPV81\_Alpha\_40804509\_nt5621\_Genome\_Tile\_rc|1  
GGATGGTAAACCCAGAAGACAAAGGAACGGTGGTATTATATGAGGAGGCCACAGAGGTAG  
>HPV81\_Alpha\_40804509\_nt5681\_Genome\_Tile\_rc|1  
GGACTATAGAAGGGGCTAAAGGAGCATAAGGCAATTCTACATCAGGCCCCAGTAGAGGCAG  
>HPV81\_Alpha\_40804509\_nt5721\_Genome\_Tile\_rc|1  
ACAACATATATGGCGTACGGGGTAGTTGCAGGAAACGAAGGGACTATAGAAGGGGCTAAA  
>HPV81\_Alpha\_40804509\_nt5741\_Genome\_Tile\_rc|1  
ACAAGTAAAAATCAGTGCCAACAACATATATGGCGTACGGGGTAGTTGCAGGAAACGAAG  
>HPV81\_Alpha\_40804509\_nt5781\_Genome\_Tile\_rc|1  
ATACGTTTATGTTTTTTAGGGAAGAATATATAAGAAGGAAACAAGTAAAAATCAGTGCCA  
>HPV81\_Alpha\_40804509\_nt5981\_Genome\_Tile\_rc|1  
GGAACGCTTTCCTTGGGTACCAATAGTTAATGTACAATATGGATGCCCTACAGTAAGAAG



>HPV81\_Alpha\_40804509\_nt6361\_Genome\_Tile\_rc|1  
AAGGGGGGGCATTCGTTTTGTGCTGGAGCAACATTAGCACAAAAGGTACCCCGGGCCCAG  
>HPV81\_Alpha\_40804509\_nt6381\_Genome\_Tile\_rc|1  
TGGTTGTATTTTTAACTCCAAGGGGGGGCATTCGTTTTGTGCTGGAGCAACATTAGCAC  
>HPV81\_Alpha\_40804509\_nt6661\_Genome\_Tile\_rc|1  
GGGGTTATTCTGTCACTGCCTGCAGCACCCCTTCATATATAAGTCTGCAGGTAAGGCCTCG  
>HPV81\_Alpha\_40804509\_nt7321\_Genome\_Tile\_rc|1  
GCATACTACTATTTTTTACGTTTTTCGCTTAGCAGAGGTAGTGGGGGTCCCTGGCAGACGCA  
>HPV81\_Alpha\_40804509\_nt7341\_Genome\_Tile\_rc|1  
CAAGCACACAGCACAAACAAGCATACTACTATTTTTTACGTTTTTCGCTTAGCAGAGGTAG  
>HPV81\_Alpha\_40804509\_nt7381\_Genome\_Tile\_rc|1  
TATAATACAAACAACACAAAACAATGCAAAATACATACACACAAGCACACAGCACAAACAA  
>HPV81\_Alpha\_40804509\_nt7601\_Genome\_Tile\_rc|1  
AGTGGTAAGGAAATACAAAGTGTGCAAGGCGTACAAACACATAAAACAAACACACACACAC  
>HPV81\_Alpha\_40804509\_nt7661\_Genome\_Tile\_rc|1  
CGGTCCCTGCAACGTTTCGGTTTTAAATGGAGGTATGTAAATGGAGGCACTACTGCAAGG  
>HPV81\_Alpha\_40804509\_nt7961\_Genome\_Tile\_rc|1  
CCTAAGTTTACATGACATATTGTTGGCGTGTAAACATGTAAAAAGCCAAACCAGCAAT  
>HPV81\_Alpha\_40804509\_nt7981\_Genome\_Tile\_rc|1  
ACAGGTTTGCACAAAGCTTGCCCTAAGTTTACATGACATATTGTTGGCGTGTAAACATGT  
>HPV43\_Alpha\_40804474\_nt0281\_Genome\_Tile\_rc|1  
AAGTGCCTATATTGACTTATTTTTTCCATGAAACTGTAGACAGGCCAAGCATGCAGCAAAC  
>HPV43\_Alpha\_40804474\_nt0361\_Genome\_Tile\_rc|1  
ACTTACAGCATCTAATGCACAAATCAAACACTGTTTGCTTAGTTTCTTCTTCTACAGTAT  
>HPV43\_Alpha\_40804474\_nt0441\_Genome\_Tile\_rc|1  
CCACACGCTATGTATTTTAAAGAATTGTGCCTTTTGCACAATATGCTGTACTTTTTCCAC  
>HPV43\_Alpha\_40804474\_nt0461\_Genome\_Tile\_rc|1  
CAATGTAGGCAGTATCCTTTCCACACGCTATGTATTTTAAAGAATTGTGCCTTTTGCACA  
>HPV43\_Alpha\_40804474\_nt1001\_Genome\_Tile\_rc|1  
CTTGTGTGCATTTAACAGAGCCTGCGCACTGCTGTGGTCTGTACAACTGTCTTCTAATG  
>HPV43\_Alpha\_40804474\_nt2201\_Genome\_Tile\_rc|1  
GTATACCATGTAACCATTTTTTTAAAGCACCTAGAAATGCTATAATGTCTATATGTTGAT  
>HPV43\_Alpha\_40804474\_nt2921\_Genome\_Tile\_rc|1  
TAATGACATTTGTAATTCAATAGCCAAATATGCTTTTTGTCTTGATACTTCTAGCTGTGG  
>HPV43\_Alpha\_40804474\_nt3201\_Genome\_Tile\_rc|1  
TATGAAATTCTACATAATAGTGCTTTTGCCACATACTGTGTATGATAGGCCTTCATAGT  
>HPV43\_Alpha\_40804474\_nt3761\_Genome\_Tile\_rc|1  
TATAGGTATTTTAACACGAGACAAAAAGTCAGCCCTCTGTTGTTCACTAATATATGTTAA  
>HPV43\_Alpha\_40804474\_nt3801\_Genome\_Tile\_rc|1  
TTTACATCATTTGTTAATGCTCCAGGCACTGTTTAATAGTTATAGGTATTTTAACACGAG  
>HPV43\_Alpha\_40804474\_nt3961\_Genome\_Tile\_rc|1  
GCAAGAATGCAAATAAAAATGTTAAGTGTAAATATGCCAAGCTTGTCATCTATAACAAT  
>HPV43\_Alpha\_40804474\_nt4081\_Genome\_Tile\_rc|1  
AATATAAAAACGTTAATAGGTGATGTAAGGACGCCCCAAGACAAAAAATAAAAGATAGAA  
>HPV43\_Alpha\_40804474\_nt4101\_Genome\_Tile\_rc|1  
AATACCACACTAACAACGCCAATATAAAAACGTTAATAGGTGATGTAAGGACGCCCCAAG  
>HPV43\_Alpha\_40804474\_nt4121\_Genome\_Tile\_rc|1  
ATGCAATAAAAGGGCTGGCAAATACCACACTAACAACGCCAATATAAAAACGTTAATAGG  
>HPV43\_Alpha\_40804474\_nt4181\_Genome\_Tile\_rc|1  
CATCTTCAAATGTACAGGTTAACATATTTACTGTTATGCAATAGCAGATATAATATACCA  
>HPV43\_Alpha\_40804474\_nt4261\_Genome\_Tile\_rc|1  
TGTTCTGTAATGAAACGCTAACACCAATATTAATACAGTTATAACTGTTACAAGTAACCA  
>HPV43\_Alpha\_40804474\_nt4281\_Genome\_Tile\_rc|1  
GAGGACTGATGCAACTTAAGTGTCTGTAATGAAACGCTAACACCAATATTAATACAGTT  
>HPV43\_Alpha\_40804474\_nt4301\_Genome\_Tile\_rc|1

AAAGGATTGTTTATTTGCTGGAGGACTGATGCAACTTAAGTGTCTGTAAATGAAACGCTA  
>HPV43\_Alpha\_40804474\_nt4701\_Genome\_Tile\_rc|1  
TATTGGTAATAGGAGCCCCGGACTGAATTATGCTTGATTCCCTCAATTAAGGACACAATAG  
>HPV43\_Alpha\_40804474\_nt4781\_Genome\_Tile\_rc|1  
TGAAGTAGATGGGGAAACATCTAAAATTGCAGGAACCTCTGATCCAGAGGAGGTTACCTC  
>HPV43\_Alpha\_40804474\_nt4801\_Genome\_Tile\_rc|1  
GTAGATGTAGTAATATGCACTGAAGTAGATGGGGAAACATCTAAAATTGCAGGAACCTCT  
>HPV43\_Alpha\_40804474\_nt4821\_Genome\_Tile\_rc|1  
TAAATGCAGGATTTAAATGTGTAGATGTAGTAATATGCACTGAAGTAGATGGGGAAACAT  
>HPV43\_Alpha\_40804474\_nt4921\_Genome\_Tile\_rc|1  
GGAATTTGTTTCAGCACTATCAGCAGTAACAGTGGAGTGAGATATTATAATACGTCCCCCA  
>HPV43\_Alpha\_40804474\_nt4941\_Genome\_Tile\_rc|1  
GTATAACAAACGTATCCATAGGAATTTGTTTCAGCACTATCAGCAGTAACAGTGGAGTGAG  
>HPV43\_Alpha\_40804474\_nt4981\_Genome\_Tile\_rc|1  
GCAGTGCCTGGAATAGGTGTGCTAGTGGTAGGATCGCTGTGTATAACAAACGTATCCATA  
>HPV43\_Alpha\_40804474\_nt5361\_Genome\_Tile\_rc|1  
GAAAGGACTGGGAACGTCCTAGGGGCTGCAATTCTATTGATTCCCTCTGTGGGTATGGAAC  
>HPV43\_Alpha\_40804474\_nt5381\_Genome\_Tile\_rc|1  
ACTAGTATCAGAAACAGTAGGAAAGGACTGGGAACGTCCTAGGGGCTGCAATTCTATTGA  
>HPV43\_Alpha\_40804474\_nt5401\_Genome\_Tile\_rc|1  
GCATATATATCATATAAATCACTAGTATCAGAAACAGTAGGAAAGGACTGGGAACGTCCT  
>HPV43\_Alpha\_40804474\_nt5441\_Genome\_Tile\_rc|1  
GTCAGTAAACTAATATCATTATTTAACAGATTCTCATCTGCATATATATCATATAAATC  
>HPV43\_Alpha\_40804474\_nt5461\_Genome\_Tile\_rc|1  
TTCTGTAGGGACACGTGTGTGTCAGTAAACTAATATCATTATTTAACAGATTCTCATCT  
>HPV43\_Alpha\_40804474\_nt5481\_Genome\_Tile\_rc|1  
TATTAACAACCTTAGTAGAATTCTGTAGGGACACGTGTGTGTCAGTAAACTAATATCAT  
>HPV43\_Alpha\_40804474\_nt5521\_Genome\_Tile\_rc|1  
TGTGCATAAATATCAGGTACAGTTGCAAGTGGCACAGCTGTATTAACAACCTTAGTAGAA  
>HPV43\_Alpha\_40804474\_nt5541\_Genome\_Tile\_rc|1  
AGCTTATGTCAGGCCCCGTTTGTGCATAAATATCAGGTACAGTTGCAAGTGGCACAGCTG  
>HPV43\_Alpha\_40804474\_nt5561\_Genome\_Tile\_rc|1  
GTGAATAGGAATAGTAGGAAAGCTTATGTCAGGCCCCGTTTGTGCATAAATATCAGGTAC  
>HPV43\_Alpha\_40804474\_nt5601\_Genome\_Tile\_rc|1  
ACTGAGGGGAAATAGATGGGGACACAGGAATATATGGAATGTGAATAGGAATAGTAGGAA  
>HPV43\_Alpha\_40804474\_nt5621\_Genome\_Tile\_rc|1  
AGTGCCATGTATGGAAACAGACTGAGGGGAAATAGATGGGGACACAGGAATATATGGAAT  
>HPV43\_Alpha\_40804474\_nt5641\_Genome\_Tile\_rc|1  
GAAGGATGCAAATAAAAATCAGTGCCATGTATGGAAACAGACTGAGGGGAAATAGATGGG  
>HPV43\_Alpha\_40804474\_nt5881\_Genome\_Tile\_rc|1  
TAGGTACAGTTATTTTACCAGAGGAATTTTAAAGGGGAAATATGGGTGACCCACTGCAA  
>HPV43\_Alpha\_40804474\_nt6561\_Genome\_Tile\_rc|1  
TATACTATCTGCAATTTTGGACCTGGTATTAGAGCCAGCAATATACATATCGGAAGGCAC  
>HPV43\_Alpha\_40804474\_nt6581\_Genome\_Tile\_rc|1  
CCACTGGGTGTAGAAAAATATATACTATCTGCAATTTTGGACCTGGTATTAGAGCCAGCA  
>HPV43\_Alpha\_40804474\_nt7201\_Genome\_Tile\_rc|1  
TAGTTTTTTTGC GTTTTAGAGGCAGGGGACAGCTAGAGGAGGATGGTGCAGAACGCTTTA  
>HPV43\_Alpha\_40804474\_nt7341\_Genome\_Tile\_rc|1  
TTTCTATTTGTCATTGCAACAATACATACAACACATATACACACATACACAAACAAGTAC  
>HPV43\_Alpha\_40804474\_nt7521\_Genome\_Tile\_rc|1  
CAACAGTAACCATTTACTAAAACCAAAGCCAGTTACAAATAGTAAACTCAAAAACACAGGA  
>HPV43\_Alpha\_40804474\_nt7541\_Genome\_Tile\_rc|1  
GACGCCATTTTACATACCCACAACAGTAACCATTACTAAAACCAAAGCCAGTTACAAATA  
>HPV43\_Alpha\_40804474\_nt7561\_Genome\_Tile\_rc|1  
AACAAAATGGAAGACGTTTCAGACGCCATTTTACATACCCACAACAGTAACCATTACTAAA

>HPV43\_Alpha\_40804474\_nt7661\_Genome\_Tile\_rc|1  
AAAAGTGTGCCAACATATTTTGGCAGGGGCACAGTAACCTTTGCAAATTATGCTGACACC  
>HPV43\_Alpha\_40804474\_nt7761\_Genome\_Tile\_rc|1  
AAGAATAAAAAGGTAATAAAACATAGAGGTGAAAAGGTACATTTGTATAGTAAAAGTGGA  
>HPV43\_Alpha\_40804474\_nt7781\_Genome\_Tile\_rc|1  
AAACAAATATATATGTCAAAAAGAATAAAAAGGTAATAAAACATAGAGGTGAAAAGGTAC  
>HPV43\_Alpha\_40804474\_nt7801\_Genome\_Tile\_rc|1  
AAGCTATTAGTAACATGAAAAACAAATATATATGTCAAAAAGAATAAAAAGGTAATAAA  
>HPV43\_Alpha\_40804474\_nt7821\_Genome\_Tile\_rc|1  
TTCATTTATGTGAGCCAAAAAGCTATTAGTAACATGAAAAACAAATATATATGTCAAA  
>HPV43\_Alpha\_40804474\_nt7841\_Genome\_Tile\_rc|1  
TACATATTTTATGACTGCAGTTCATTTATGTGAGCCAAAAAGCTATTAGTAACATGAA  
>HPV43\_Alpha\_40804474\_nt7861\_Genome\_Tile\_rc|1  
CTTACCACAACACTTACTCATACATATTTTATGACTGCAGTTCATTTATGTGAGCCAAAA  
>HPVcand87\_Alpha\_14475578\_nt0081\_Genome\_Tile\_rc|1  
AAAGATATTGGTAGGTGTGTAGCGTCCGTTGGGCATGACTGTCCCGTTGCACATACACCG  
>HPVcand87\_Alpha\_14475578\_nt0101\_Genome\_Tile\_rc|1  
TCATATTCTTGACATAGCAAAAAGATATTGGTAGGTGTGTAGCGTCCGTTGGGCATGACT  
>HPVcand87\_Alpha\_14475578\_nt1661\_Genome\_Tile\_rc|1  
CTCTGGAATATTTAATATAGTGCCATACAGTGTGCCACTGTTTCCCTACTTTTGTGCA  
>HPVcand87\_Alpha\_14475578\_nt2521\_Genome\_Tile\_rc|1  
AGAAACGGAAACACCACATTCTGCTCCGTAAATACTTTAAACTGTCATCTGCCTCTATA  
>HPVcand87\_Alpha\_14475578\_nt3521\_Genome\_Tile\_rc|1  
CTGATACAGTTGTCCCGTGTCCACTGTGTGTTGTTAGGGTTATTGTTTGTCCGTGTGTAG  
>HPVcand87\_Alpha\_14475578\_nt3801\_Genome\_Tile\_rc|1  
TACAGTATTATGCACAATGCTTTATACACACATAGACATATGTCCCTGTGTAGCCACAAT  
>HPVcand87\_Alpha\_14475578\_nt3841\_Genome\_Tile\_rc|1  
TGTATTATACAGCTAGGTTACATACAGGTACACCAATGTATACAGTATTATGCACAATGC  
>HPVcand87\_Alpha\_14475578\_nt3861\_Genome\_Tile\_rc|1  
TATATGTCAGGTATGCAAAATGTATTATACAGCTAGGTTACATACAGGTACACCAATGTA  
>HPVcand87\_Alpha\_14475578\_nt3881\_Genome\_Tile\_rc|1  
TAAGGTCCAGGGTTGTGCTGTATATGTCAGGTATGCAAAATGTATTATACAGCTAGGTTA  
>HPVcand87\_Alpha\_14475578\_nt4061\_Genome\_Tile\_rc|1  
TGGTTGTGTGATTTACTTATAACACTTCAATGTACCACAGTACCTGCATATACAAAAC  
>HPVcand87\_Alpha\_14475578\_nt4201\_Genome\_Tile\_rc|1  
CAAAATTAATGCCAATATACCAACATCTCCACGCTCAAACAATACTATATCATATCCACC  
>HPVcand87\_Alpha\_14475578\_nt4221\_Genome\_Tile\_rc|1  
AAGATAATAGCAATCAGTAACAAAATTAATGCCAATATACCAACATCTCCACGCTCAAAC  
>HPVcand87\_Alpha\_14475578\_nt4241\_Genome\_Tile\_rc|1  
TGCGTATGTATAACAAAATTAAGATAATAGCAATCAGTAACAAAATTAATGCCAATATAC  
>HPVcand87\_Alpha\_14475578\_nt4321\_Genome\_Tile\_rc|1  
GTTTTCGACGGGATTTTGGCATGGTACCAGTTTATTACAAACAATACAAAATTACAATAC  
>HPVcand87\_Alpha\_14475578\_nt4481\_Genome\_Tile\_rc|1  
CCCGATGAGGTGCCAATGCCAAGGCCACCGAAGAAGACACCCAGGCTGGCCCACTTAAGA  
>HPVcand87\_Alpha\_14475578\_nt5421\_Genome\_Tile\_rc|1  
GCTGTGCAATGATGGAAGAGAGGGCCCCCGTAACACAGAGGACAAATGGGTATCATCAGC  
>HPVcand87\_Alpha\_14475578\_nt5441\_Genome\_Tile\_rc|1  
GTAGATGCTGTAGGGGTAGAGCTGTGCAATGATGGAAGAGAGGGCCCCCGTAACACAGAG  
>HPVcand87\_Alpha\_14475578\_nt5461\_Genome\_Tile\_rc|1  
TGGACGTGGCCGACACCTTTGTAGATGCTGTAGGGGTAGAGCTGTGCAATGATGGAAGAG  
>HPVcand87\_Alpha\_14475578\_nt5481\_Genome\_Tile\_rc|1  
ATAATGGGAAGAGGATAGTATGGACGTGGCCGACACCTTTGTAGATGCTGTAGGGGTAGA  
>HPVcand87\_Alpha\_14475578\_nt5541\_Genome\_Tile\_rc|1  
AATATCGGGACCTGTATATAGGGGCACATCTGTTGCAGACAAGGGGACTGTTACATTGTC  
>HPVcand87\_Alpha\_14475578\_nt5881\_Genome\_Tile\_rc|1

TTTCTTGTCTGACCAGGGGTGGTAACAGTAACTGGATAGTAAGGGTGACCCACAGTAAG  
>HPVcand87\_Alpha\_14475578\_nt5901\_Genome\_Tile\_rc|1  
GACACCTTTGGAATATTGGATTTCTTGTCTGACCAGGGGTGGTAACAGTAACTGGATAG  
>HPVcand87\_Alpha\_14475578\_nt6281\_Genome\_Tile\_rc|1  
TAGAATTAGTAAATTGCAATGGTGGACAATCCCCTGTCTTGGGCTGTACATTGGCACAAA  
>HPVcand87\_Alpha\_14475578\_nt6581\_Genome\_Tile\_rc|1  
CATACACATAACTGCTTAAAGAGGCCCTAGGGCCAGACGACGCCCCCTTCAAAAAATAGG  
>HPVcand87\_Alpha\_14475578\_nt7261\_Genome\_Tile\_rc|1  
AACATAAAAAAGTACATACCAAACAGACATACAATATAGCACACACACCACACTACTTTTT  
>HPVcand87\_Alpha\_14475578\_nt7281\_Genome\_Tile\_rc|1  
AACAAACACAATACATACAAAACATAAAAAAGTACATACCAAACAGACATACAATATAGCA  
>HPVcand87\_Alpha\_14475578\_nt7301\_Genome\_Tile\_rc|1  
ATACATACAAAGCATATACAAACAAACACAATACATACAAAACATAAAAAAGTACATACCA  
>HPVcand62\_Alpha\_39932599\_nt0721\_Genome\_Tile\_rc|1  
CCTCCGGCCCCGTTTGTACCATCTATCCCATCCCCGCCATTGGTACCTTCCGCATCGGCC  
>HPVcand62\_Alpha\_39932599\_nt1001\_Genome\_Tile\_rc|1  
GTTCAACCGCGGGCTCAATTCACAGTCCACCCAGGATACACATGAGCTTGTTCAGGACT  
>HPVcand62\_Alpha\_39932599\_nt1261\_Genome\_Tile\_rc|1  
TTACTGGTTTTTAACAGCTCTACAATACTTGCTGTGCGTTCCTGCGATTGTTGCACATCT  
>HPVcand62\_Alpha\_39932599\_nt1821\_Genome\_Tile\_rc|1  
CATTGGGGTTCGTATTGCCAGCAATGCGTATTGATATGCTAGGTCACCTTCGTCCACTA  
>HPVcand62\_Alpha\_39932599\_nt2061\_Genome\_Tile\_rc|1  
TGGGTATATTTCTTAAAAACATTTTTAGTGCACCTCATAAATGTCACAAAATCTATTTTTT  
>HPVcand62\_Alpha\_39932599\_nt2081\_Genome\_Tile\_rc|1  
TATTACTATACAGCTTTTTTTGGGTATATTTCTTAAAAACATTTTTAGTGCACCTCATAAA  
>HPVcand62\_Alpha\_39932599\_nt2361\_Genome\_Tile\_rc|1  
TTATATTGGTGGTAATAAATAAGGGAGGACATTGTATCTGTGTCAGGTTTTTATGTTTTT  
>HPVcand62\_Alpha\_39932599\_nt2401\_Genome\_Tile\_rc|1  
CTACTATGCAGGTATTTTAGATTTGCGTCTTCCAAAGGATTTATATTGGTGGTAATAAAT  
>HPVcand62\_Alpha\_39932599\_nt2421\_Genome\_Tile\_rc|1  
TAAAGTGGAATACTGCAATTCTACTATGCAGGTATTTTAGATTTGCGTCTTCCAAAGGAT  
>HPVcand62\_Alpha\_39932599\_nt3021\_Genome\_Tile\_rc|1  
GCTTACCTTTCCTTGTACTTTACACCATTGCTCGGTATCTGTTTGACATATATGTACCC  
>HPVcand62\_Alpha\_39932599\_nt3041\_Genome\_Tile\_rc|1  
TCGTAGTATAGCCCTTCATAGCTTACCTTTCCTTGTACTTTACACCATTGCTCGGTATCT  
>HPVcand62\_Alpha\_39932599\_nt3241\_Genome\_Tile\_rc|1  
TGGTGGTGGGTTCGGGGGTGTGTAGCAGTCTAGTAGTTTCAGCAGGGGGTATCTCTCGCA  
>HPVcand62\_Alpha\_39932599\_nt3661\_Genome\_Tile\_rc|1  
TGCCTTTTGGTATTGTTACACGTTGCAGGAATTCCTGTGCGTTGTTCTATATTGGCATAACC  
>HPVcand62\_Alpha\_39932599\_nt3681\_Genome\_Tile\_rc|1  
ATACCCTTGCAATTGCTTGTATGCCTTTTGGTATTGTTACACGTTGCAGGAATTCTGTGCG  
>HPVcand62\_Alpha\_39932599\_nt3761\_Genome\_Tile\_rc|1  
AATATTGTTTACACACGTAGCTATATGTGATTACAGTAATATATATGTACATATATATAT  
>HPVcand62\_Alpha\_39932599\_nt3781\_Genome\_Tile\_rc|1  
GGCTCAGATACAGCACAAACAATATTGTTTACACACGTAGCTATATGTGATTACAGTAAT  
>HPVcand62\_Alpha\_39932599\_nt4081\_Genome\_Tile\_rc|1  
TGCATACCTACTAAACACCTGCAAATACACCTACTATGTATATACACAATAGCAGCAGTG  
>HPVcand62\_Alpha\_39932599\_nt4101\_Genome\_Tile\_rc|1  
AGGAGCGTACCATAACAGGATGCATACCTACTAAACACCTGCAAATACACCTACTATGTA  
>HPVcand62\_Alpha\_39932599\_nt4201\_Genome\_Tile\_rc|1  
TTGTATATAGCAAACAGTATTAATGCCACTATGAGGCACAATAAAAAACAGTAGACCACTG  
>HPVcand62\_Alpha\_39932599\_nt4221\_Genome\_Tile\_rc|1  
GTAGTTACAATTGCAACAACCTTGTATATAGCAAACAGTATTAATGCCACTATGAGGCACA  
>HPVcand62\_Alpha\_39932599\_nt4241\_Genome\_Tile\_rc|1  
ATATGGTATGTACAACGCTGGTAGTTACAATTGCAACAACCTTGTATATAGCAAACAGTAT

>HPVcand62\_Alpha\_39932599\_nt4261\_Genome\_Tile\_rc|1  
ATAAAGCAACAATAACAGAAATATGGTATGTACAACGCTGGTAGTTACAATTGCAACAAC  
>HPVcand62\_Alpha\_39932599\_nt4801\_Genome\_Tile\_rc|1  
AGTATATGCAGGATTTAAAAAGTTGGTACTGCTAACCTGTACAGTGGTACCGGTAGGGGA  
>HPVcand62\_Alpha\_39932599\_nt4861\_Genome\_Tile\_rc|1  
ACTGGTAAGCACATGACCCGAAAGCTCACCAGTTTGGGGAGGGTCTATAATGGATGGCTC  
>HPVcand62\_Alpha\_39932599\_nt5461\_Genome\_Tile\_rc|1  
ATTGCTGGGAACCAAGGGCCTGGAAGACATAGAAGGCACAGACTGTAATACAGCATCAAG  
>HPVcand62\_Alpha\_39932599\_nt5501\_Genome\_Tile\_rc|1  
TAGTATGAGAGGATGCCACAGACGTGGCAGATATGGTGGCATTGCTGGGAACCAAGGGCC  
>HPVcand62\_Alpha\_39932599\_nt5601\_Genome\_Tile\_rc|1  
GGCGTTAGCACAGACACAGGTACAGAAAAC TGAGGCAATTCCACATCAGGGCCAGTGGAC  
>HPVcand62\_Alpha\_39932599\_nt5621\_Genome\_Tile\_rc|1  
GGGTAGTTGCAGGGAAGGAAGGCGTTAGCACAGACACAGGTACAGAAAAC TGAGGCAATT  
>HPVcand62\_Alpha\_39932599\_nt5641\_Genome\_Tile\_rc|1  
TACAATATATATAGAATATGGGGTAGTTGCAGGGAAGGAAGGCGTTAGCACAGACACAGG  
>HPVcand62\_Alpha\_39932599\_nt5681\_Genome\_Tile\_rc|1  
GGAAAAAATATAGGAAGGGAACAAATAATAATCAGAACCTACAATATATAGAATATG  
>HPVcand62\_Alpha\_39932599\_nt6241\_Genome\_Tile\_rc|1  
GGGCATAAGGTACCTTTGGTCCAGTGCTCTCCTATAGGGGGCTTACACCCCAATTAAC  
>HPVcand62\_Alpha\_39932599\_nt7321\_Genome\_Tile\_rc|1  
TATACAAACAGGCCATACATACATATAACAAAACACACTGACAAACGCGCACAACACAGT  
>HPVcand62\_Alpha\_39932599\_nt7341\_Genome\_Tile\_rc|1  
AGGGGGGTACATACACAACATATACAAAACAGGCCATACATACATATAACAAAACACACTG  
>HPVcand62\_Alpha\_39932599\_nt7561\_Genome\_Tile\_rc|1  
GTCGGGGTAACACAATGGGGTCATACAAAATGTAGCACACAAAATGGAGGCACTAATGTA  
>HPVcand62\_Alpha\_39932599\_nt7741\_Genome\_Tile\_rc|1  
GCACTGTATAATTTGTGTGCAAAACAGTTGTAGGCCGCCAAGAATATGTCAGGCACGCCC  
>HPVcand62\_Alpha\_39932599\_nt7901\_Genome\_Tile\_rc|1  
CCCACCTTGATGTTAAACAGGTTTGCACAAAGCATGCTTAGTTTATAGGACACATAGT  
>HPVcand62\_Alpha\_39932599\_nt7921\_Genome\_Tile\_rc|1  
AAAGTAGACTTACACATTGCCCCACCTTGATGTTAAACAGGTTTGCACAAAGCATGCT  
>HPVcand62\_Alpha\_39932599\_nt7961\_Genome\_Tile\_rc|1  
CTTTATTATACAGATGATTGTTGTAAATTATTATAAGGGAAAAGTAGACTTACACATTGC  
>HPVcand85\_Alpha\_4574720\_nt0081\_Genome\_Tile\_rc|1  
GTAGGGTCGGGTAGCTGGATTGCCAAATTCAGCCATCCTATTACATGTACTGTAAGCTGG  
>HPVcand85\_Alpha\_4574720\_nt0121\_Genome\_Tile\_rc|1  
GCAGTGATGTGTCCAGTGTGTTGCATAGGTCTGGTAGTTTGTAGGGTCGGGTAGCTGGAT  
>HPVcand85\_Alpha\_4574720\_nt0341\_Genome\_Tile\_rc|1  
TATATATTGCTATTTGTTAGTTTTTCTAACGTTTCCCCATACACAGAGTCGCTATAATAT  
>HPVcand85\_Alpha\_4574720\_nt0401\_Genome\_Tile\_rc|1  
TTTAGTTTTTCTGCCGACATAAAGGTTTTTGACACCGTAAACACCTTATTAATATATCA  
>HPVcand85\_Alpha\_4574720\_nt0501\_Genome\_Tile\_rc|1  
GCGGCTGCCTTGCTGTTCTTGTGCACGCGTCATGCACCGGCGACACTGTCTCTATATTT  
>HPVcand85\_Alpha\_4574720\_nt0621\_Genome\_Tile\_rc|1  
ATTCCTCATAGCAATACAGGTCAACCTCTTGCACTTCATTATATGGTTCCAAATCTAACA  
>HPVcand85\_Alpha\_4574720\_nt0661\_Genome\_Tile\_rc|1  
GCATTATCTGGTTCATCTATTTCTTCTCTGAGTTGTTTAATTCCTCATAGCAATACAGG  
>HPVcand85\_Alpha\_4574720\_nt0681\_Genome\_Tile\_rc|1  
GTGGTTGTCGGTGATTAATTGCATTATCTGGTTCATCTATTTCTTCTCTGAGTTGTTTA  
>HPVcand85\_Alpha\_4574720\_nt1181\_Genome\_Tile\_rc|1  
GCTATGTATACTTGCTGTATCACGACATGGACTGTTTTCTGTGCTGTGTGCTCCATACTT  
>HPVcand85\_Alpha\_4574720\_nt1261\_Genome\_Tile\_rc|1  
TCTGGCACTGAACACAGCCTTCGTTTAGCTGTATTATTATAGCTATTTAACGATATTTCT  
>HPVcand85\_Alpha\_4574720\_nt1381\_Genome\_Tile\_rc|1

TTATCTGTACTACATGCCTCACTATTTAAACCGTCGCCATTTTTCCCATCCCCAAACACA  
>HPVcand85\_Alpha\_4574720\_nt1461\_Genome\_Tile\_rc|1  
CTTTTTTATTATTTACTTTTAATAAGGACACAATTTGTGTCATTGGTGAGTTTGGATTTT  
>HPVcand85\_Alpha\_4574720\_nt1481\_Genome\_Tile\_rc|1  
AAATTTAGCCAATATTGCTGCTTTTTTATTATTTACTTTTAATAAGGACACAATTTGTGT  
>HPVcand85\_Alpha\_4574720\_nt2441\_Genome\_Tile\_rc|1  
ATAGGACCAGCATGTTGGTGTTCATCATCTACCATAGCTATCTTAGTGTCTGTTAACGG  
>HPVcand85\_Alpha\_4574720\_nt2761\_Genome\_Tile\_rc|1  
GTTGGGATAGGGCATCCATCATTTTTCTGTATCCTCCTCTTCCTGGTGCAAATCTAATCTG  
>HPVcand85\_Alpha\_4574720\_nt2861\_Genome\_Tile\_rc|1  
TTTTCCAGACGTACACACTTCCAATAGTCTATTTGATCACATATGTCTGTACTATCAGTC  
>HPVcand85\_Alpha\_4574720\_nt3041\_Genome\_Tile\_rc|1  
TCTTGGCACGTATCTTGCAATGTCCACAGTTCATTTTTAACTCTGATTTAGCAAGACTC  
>HPVcand85\_Alpha\_4574720\_nt3141\_Genome\_Tile\_rc|1  
AGATGTATAATGCATAGTATTGTCTTTGTCTCCATCATACCGTACTTCGACGGTTTGTCC  
>HPVcand85\_Alpha\_4574720\_nt3161\_Genome\_Tile\_rc|1  
ACATAATATATATAGTCCCAAGATGTATAATGCATAGTATTGTCTTTGTCTCCATCATAC  
>HPVcand85\_Alpha\_4574720\_nt3181\_Genome\_Tile\_rc|1  
ACCACTTATCACCTTCTGTTACATAATATATATAGTCCCAAGATGTATAATGCATAGTAT  
>HPVcand85\_Alpha\_4574720\_nt3241\_Genome\_Tile\_rc|1  
TTTGTGTGCCCTCCTTTATATAATACAATCCACAATAATTCACATAACCTTTGGTTTTAC  
>HPVcand85\_Alpha\_4574720\_nt3261\_Genome\_Tile\_rc|1  
TTTAAACTGTACATAATATGTTTGTGTCCCTCCTTTATATAATACAATCCACAATAATT  
>HPVcand85\_Alpha\_4574720\_nt3281\_Genome\_Tile\_rc|1  
CCATATTGTTGTGCATCACATTTAACTGTACATAATATGTTTGTGTGCCCTCCTTTATA  
>HPVcand85\_Alpha\_4574720\_nt3321\_Genome\_Tile\_rc|1  
TTTTTTTACCATTATACCACACTTCCCATTTACCGCTCTGTCCATATTGTTGTGCATCACA  
>HPVcand85\_Alpha\_4574720\_nt3341\_Genome\_Tile\_rc|1  
CAGGTATTTACACATTCAATTTTTTTTACCATTATACCACACTTCCCATTTACCGCTCTGT  
>HPVcand85\_Alpha\_4574720\_nt3361\_Genome\_Tile\_rc|1  
AACATTGTATTATTTTGTTCACAGGTATTTACACATTCAATTTTTTTTACCATTATACCACA  
>HPVcand85\_Alpha\_4574720\_nt3381\_Genome\_Tile\_rc|1  
GGTACTGTACATAGATTCAGAACATTGTATTATTTTGTTCACAGGTATTTACACATTCAAT  
>HPVcand85\_Alpha\_4574720\_nt3401\_Genome\_Tile\_rc|1  
GCGGATACTGTCTCGTTCACAGGTACTGTACATAGATTCAGAACATTGTATTATTTTGTCA  
>HPVcand85\_Alpha\_4574720\_nt3461\_Genome\_Tile\_rc|1  
ACGGTGGTGGCTTCGGTATACGGTGTGGTGGGGTGTGTGAATTCTCTAGCAATTGCAGTA  
>HPVcand85\_Alpha\_4574720\_nt3501\_Genome\_Tile\_rc|1  
GTTTCTAGTCGGCGCCGAACCCCCGCTCTTTTGGGTGCACACGGTGGTGGCTTCGGTATA  
>HPVcand85\_Alpha\_4574720\_nt3561\_Genome\_Tile\_rc|1  
GTGGTCCACGGACAGTCCGTCGACTTCACTTGTTTCTGTGAATCCACAATGTCTGAATGG  
>HPVcand85\_Alpha\_4574720\_nt3581\_Genome\_Tile\_rc|1  
CTAAGCAGGGGGTGTGTGAGGTGGTCCACGGACAGTCCGTCGACTTCACTTGTTTCTGTG  
>HPVcand85\_Alpha\_4574720\_nt3701\_Genome\_Tile\_rc|1  
TGGAACCTTTGTAGCCTGTATCGCAAACACTTTAATCTATTTTTTATCACCTTTTAGGTGC  
>HPVcand85\_Alpha\_4574720\_nt3721\_Genome\_Tile\_rc|1  
ATATTTGTGTATATAAATTATGGAACCTTTGTAGCCTGTATCGCAAACACTTTAATCTAT  
>HPVcand85\_Alpha\_4574720\_nt3741\_Genome\_Tile\_rc|1  
TATCCAATGCCACGTACATGATATTGTGTATATAAATTATGGAACCTTTGTAGCCTGTA  
>HPVcand85\_Alpha\_4574720\_nt3761\_Genome\_Tile\_rc|1  
CTTGTTGTTTCTTTACCACCTATCCAATGCCACGTACATGATATTTGTGTATATAAATTA  
>HPVcand85\_Alpha\_4574720\_nt3781\_Genome\_Tile\_rc|1  
CCAATGTTAATATACCAGTCCTTGTTGTTTCTTTACCACCTATCCAATGCCACGTACATG  
>HPVcand85\_Alpha\_4574720\_nt3821\_Genome\_Tile\_rc|1  
ACATCCAAAAATTTTTGTCTTTGGGTTTCATTGTCATATGCCAATGTTAATATACCAGTC

>HPVcand85\_Alpha\_4574720\_nt3861\_Genome\_Tile\_rc|1  
ATAACCAAGGGATACATTAAACAGTATTAGGTATTTTTACAACATCCAAAAATTTTTGTCT  
>HPVcand85\_Alpha\_4574720\_nt3881\_Genome\_Tile\_rc|1  
TACCCCTATTACAATGTCATATAACCAAGGGATACATTAAACAGTATTAGGTATTTTTACA  
>HPVcand85\_Alpha\_4574720\_nt3901\_Genome\_Tile\_rc|1  
CAAAAATACAGCAATTAACATACCCCTATTACAATGTCATATAACCAAGGGATACATTAA  
>HPVcand85\_Alpha\_4574720\_nt4021\_Genome\_Tile\_rc|1  
AAAAGGGGTAGTAATAAAAACTATTAAACAAAAACACAAGTAGCCAAGCATGCGCACACAC  
>HPVcand85\_Alpha\_4574720\_nt4041\_Genome\_Tile\_rc|1  
ATATATACAATAAATGCAGTAAAAGGGGTAGTAATAAAAACTATTAAACAAAAACACAAGT  
>HPVcand85\_Alpha\_4574720\_nt4061\_Genome\_Tile\_rc|1  
TTGGCAATATAAAAAAATATATATACAATAAATGCAGTAAAAGGGGTAGTAATAAAAA  
>HPVcand85\_Alpha\_4574720\_nt4081\_Genome\_Tile\_rc|1  
GTGCAATGCAATAAAAAACATTGGCAATATAAAAAAATATATATACAATAAATGCAGT  
>HPVcand85\_Alpha\_4574720\_nt4101\_Genome\_Tile\_rc|1  
TAGTCAAATGTATGTACACTGTGCAATGCAATAAAAAACATTGGCAATATAAAAAAAT  
>HPVcand85\_Alpha\_4574720\_nt4121\_Genome\_Tile\_rc|1  
AATACAGGTTATATAGTACTTAGTCAAATGTATGTACACTGTGCAATGCAATAAAAAACA  
>HPVcand85\_Alpha\_4574720\_nt4141\_Genome\_Tile\_rc|1  
ACCAATGTAATGTCCTGTACAATACAGGTTATATAGTACTTAGTCAAATGTATGTACACT  
>HPVcand85\_Alpha\_4574720\_nt4161\_Genome\_Tile\_rc|1  
TTACAAAAAGGTATTACACTACCAATGTAATGTCCTGTACAATACAGGTTATATAGTACT  
>HPVcand85\_Alpha\_4574720\_nt4181\_Genome\_Tile\_rc|1  
ACGATGGGATACCATGTTTATTACAAAAAGGTATTACACTACCAATGTAATGTCCTGTAC  
>HPVcand85\_Alpha\_4574720\_nt4541\_Genome\_Tile\_rc|1  
TGTGCCTGTAAATGTAGGAACAGGAGCTCCAGATGTAACAATACTGGACTCTTCAACTAA  
>HPVcand85\_Alpha\_4574720\_nt4761\_Genome\_Tile\_rc|1  
TGTGCATTGGAATTTCCCTCGTATCCATGTGTCCCAGATGTAGGGGTAGTAATAAAAAATAT  
>HPVcand85\_Alpha\_4574720\_nt4881\_Genome\_Tile\_rc|1  
AATTAGTTATTTTAACTTGTTGATACGCTTGACTATATAATCTAGGTCCTGCCACACGCC  
>HPVcand85\_Alpha\_4574720\_nt4921\_Genome\_Tile\_rc|1  
GTAAATGTAACCAACGTAGATGGACGGGATATAAAGTCTGAATTAGTTATTTTAACTTGT  
>HPVcand85\_Alpha\_4574720\_nt4941\_Genome\_Tile\_rc|1  
TAGGCTCATATGCAGGATTGGTAAATGTAACCAACGTAGATGGACGGGATATAAAGTCTG  
>HPVcand85\_Alpha\_4574720\_nt4981\_Genome\_Tile\_rc|1  
GGCACAACATCCTGTGGTGAAAAGGTTAATGTAGTGTCTATAGGCTCATATGCAGGATTG  
>HPVcand85\_Alpha\_4574720\_nt5281\_Genome\_Tile\_rc|1  
GAAATATTTCTATCATATAGCATGGCATTATTATCAATATCAGTGTGTCAGCATAAATGTCA  
>HPVcand85\_Alpha\_4574720\_nt5301\_Genome\_Tile\_rc|1  
TGGTAGGTTGTGTAACATCAGAAATATTTCTATCATATAGCATGGCATTATTATCAATAT  
>HPVcand85\_Alpha\_4574720\_nt5321\_Genome\_Tile\_rc|1  
TACACTAGATATAGTTGAAGTGGTAGGTTGTGTAACATCAGAAATATTTCTATCATATAG  
>HPVcand85\_Alpha\_4574720\_nt5341\_Genome\_Tile\_rc|1  
GTATTACTATAACGAGAGGATACACTAGATATAGTTGAAGTGGTAGGTTGTGTAACATCA  
>HPVcand85\_Alpha\_4574720\_nt5361\_Genome\_Tile\_rc|1  
ATGTTGCTAAAGGAATAGTAGTATTACTATAACGAGAGGATACACTAGATATAGTTGAAG  
>HPVcand85\_Alpha\_4574720\_nt5381\_Genome\_Tile\_rc|1  
ATGAACAGGAACATCCCAAGATGTTGCTAAAGGAATAGTAGTATTACTATAACGAGAGGA  
>HPVcand85\_Alpha\_4574720\_nt5421\_Genome\_Tile\_rc|1  
ACTGGGGTATAGTAGGTAATGTCATGTCAGGCCCTGTATGAACAGGAACATCCCAAG  
>HPVcand85\_Alpha\_4574720\_nt5441\_Genome\_Tile\_rc|1  
TAAAGGTACTATATTAGGCCACTGGGGTATAGTAGTAGGTAATGTCATGTCAGGCCCTGT  
>HPVcand85\_Alpha\_4574720\_nt5461\_Genome\_Tile\_rc|1  
GAATGTGTATTATTAGGCAGTAAAGGTACTATATTAGGCCACTGGGGTATAGTAGTAGGT  
>HPVcand85\_Alpha\_4574720\_nt5481\_Genome\_Tile\_rc|1

[illegible]



>HPV74\_Alpha\_27462483\_nt3581\_Genome\_Tile\_rc|1  
ATTAGCATATGTTAGTGTACTAGTGCATGTTTTGTGGGTATAGTGGGACTGGTCCAATG  
>HPV74\_Alpha\_27462483\_nt3621\_Genome\_Tile\_rc|1  
GTAGTCTTACAGTATCTAAAACTGTTGTCGCTGTTGTTTCATTAGCATATGTTAGTGTTA  
>HPV74\_Alpha\_27462483\_nt3641\_Genome\_Tile\_rc|1  
CTTATAACTAATTGTTGTAGGTAGTCTTACAGTATCTAAAACTGTTGTCGCTGTTGTTTC  
>HPV74\_Alpha\_27462483\_nt3661\_Genome\_Tile\_rc|1  
TGTAATGACATATATCCCAACTTATAACTAATTGTTGTAGGTAGTCTTACAGTATCTAAA  
>HPV74\_Alpha\_27462483\_nt3681\_Genome\_Tile\_rc|1  
CAATGCACTATTACAACAATTGTAATGACATATATCCCAACTTATAACTAATTGTTGTAG  
>HPV74\_Alpha\_27462483\_nt3701\_Genome\_Tile\_rc|1  
TACAATACATACAATATTTACAATGCACTATTACAACAATTGTAATGACATATATCCCAA  
>HPV74\_Alpha\_27462483\_nt3721\_Genome\_Tile\_rc|1  
CTATAGGTATTAGGTCCATGTACAATACATACAATATTTACAATGCACTATTACAACAAT  
>HPV74\_Alpha\_27462483\_nt3861\_Genome\_Tile\_rc|1  
TAGAATGAGTGTTAGTACCAGTATGGATGTATATACAAAAAATCAGTTATTGCTATAAT  
>HPV74\_Alpha\_27462483\_nt3981\_Genome\_Tile\_rc|1  
TAGTTACTCTAAATTATGTAAATATATAAATGCAAAGAAAACGCAGGTAGATAGCACAC  
>HPV74\_Alpha\_27462483\_nt4081\_Genome\_Tile\_rc|1  
TGCATTAACAATAATGCAAGAATAGCTACGATAAGTGCAGTTAACAACCATATAACAAC  
>HPV74\_Alpha\_27462483\_nt4101\_Genome\_Tile\_rc|1  
AAGGCGTTACACCCTTGAAATGCATTAACAATAATGCAAGAATAGCTACGATAAGTGCAG  
>HPV74\_Alpha\_27462483\_nt4141\_Genome\_Tile\_rc|1  
ATACACAGCATGTATAAAAAACACTTATTTACTGCATACAGAAGGCGTTACACCCTTGAAA  
>HPV74\_Alpha\_27462483\_nt4681\_Genome\_Tile\_rc|1  
ACCAGCCTCTACGGGGGTTGAGACTGTATAACAGAAGGGTCAGTAAACGAGGGATTTCT  
>HPV74\_Alpha\_27462483\_nt4701\_Genome\_Tile\_rc|1  
GAGGAAATCAGCACATGACCACCAGCCTCTACGGGGGTTGAGACTGTATAACAGAAGGG  
>HPV74\_Alpha\_27462483\_nt4761\_Genome\_Tile\_rc|1  
GAGGAGACAATAAATGTATCTAAAGGTATTTCCCTCTACTGGATGGGAAGAAACAGTAGAG  
>HPV74\_Alpha\_27462483\_nt5001\_Genome\_Tile\_rc|1  
AGGCGAATAATGTCCATAAAGGCATCATCAGGAGGATTATGTATTGTATTGTGTTGAAAT  
>HPV74\_Alpha\_27462483\_nt5721\_Genome\_Tile\_rc|1  
CAGACACTTTAGGAACAACCTGTTTTGTTAACCTGTTTTATAGGGAAATAGGGATTTCTTA  
>HPV74\_Alpha\_27462483\_nt6101\_Genome\_Tile\_rc|1  
ACTAGTAATTAATTCTAATGCAGGGCAATCGCCTGGCTTTACAGTAACATTAGAACATTG  
>HPV74\_Alpha\_27462483\_nt6401\_Genome\_Tile\_rc|1  
GGTATTAAAGTAAATAGCATTGGCAAGTGTACCACGTGTAGTACCCTTAATATATAGGTC  
>HPV74\_Alpha\_27462483\_nt6601\_Genome\_Tile\_rc|1  
TCTGTACTAGTATATGTAGCAGCAGGAGGGGATTGTGTAGTAGGCGCACACACTGTCATG  
>HPV74\_Alpha\_27462483\_nt6621\_Genome\_Tile\_rc|1  
GTCTCATGTATTGTTTGTAGTCTGTACTAGTATATGTAGCAGCAGGAGGGGATTGTGTAG  
>HPV74\_Alpha\_27462483\_nt6881\_Genome\_Tile\_rc|1  
CTTAAGATTTACTTCCCAAAACTTAAATTTGGCATAGGGATTAGGCTTTGCTTTATCAGG  
>HPV74\_Alpha\_27462483\_nt7021\_Genome\_Tile\_rc|1  
TTCTGTTTAGTGGTTGAGGAGGGGGCTGTAGGGGCCGAACGCTTTTTACCTACACGAACC  
>HPV74\_Alpha\_27462483\_nt7041\_Genome\_Tile\_rc|1  
GCTATCGTTTCCTAGAGCGTTTCTGTTTAGTGTTGAGGAGGGGGCTGTAGGGGCCGAAC  
>HPV74\_Alpha\_27462483\_nt7061\_Genome\_Tile\_rc|1  
AACACACAAAACAAAAGCATGCTATCGTTTCTTAGAGCGTTTCTGTTTAGTGTTGAGGA  
>HPV74\_Alpha\_27462483\_nt7081\_Genome\_Tile\_rc|1  
TATACCATGCAACAACATATAACACACAAAACAAAAGCATGCTATCGTTTTCCTAGAGCGT  
>HPV74\_Alpha\_27462483\_nt7101\_Genome\_Tile\_rc|1  
ACAATATAATACACACACATATACCATGCAACAACATATAACACACAAAACAAAAGCAT  
>HPV74\_Alpha\_27462483\_nt7141\_Genome\_Tile\_rc|1

CAAGTACATACAACATAAACCATACAACAACATATGACACACAATATAATACAACACACA  
>HPV74\_Alpha\_27462483\_nt7181\_Genome\_Tile\_rc|1  
CATACAACATTACACAACATGACACATACAATATGACACACAAGTACATACAACATAAAC  
>HPV74\_Alpha\_27462483\_nt7241\_Genome\_Tile\_rc|1  
TATTGTACACAACAAACACATACATGCAGTACATACAACAGTAAACACATACAGGCAGTA  
>HPV74\_Alpha\_27462483\_nt7261\_Genome\_Tile\_rc|1  
ACACAGGGATAGATAAAGTTTATTGTACACAACAAACACATACATGCAGTACATACAACA  
>HPV74\_Alpha\_27462483\_nt7281\_Genome\_Tile\_rc|1  
CACGTACAGGGTAAAACAGGACACAGGGATAGATAAAGTTTATTGTACACAACAAACACA  
>HPV74\_Alpha\_27462483\_nt7301\_Genome\_Tile\_rc|1  
GAATTATAAGACAAGACACACACGTACAGGGTAAAACAGGACACAGGGATAGATAAAGTT  
>HPV74\_Alpha\_27462483\_nt7321\_Genome\_Tile\_rc|1  
AAAGGTAAATTAGGTATATAGAATTATAAGACAAGACACACACGTACAGGGTAAAACAGG  
>HPV74\_Alpha\_27462483\_nt7441\_Genome\_Tile\_rc|1  
CTTGGCAAACAGTATATAGGATTACATAAAATGCTTGCTGCAACAAATGGTTACAGGAT  
>HPV74\_Alpha\_27462483\_nt7581\_Genome\_Tile\_rc|1  
CAACTACAAAAATGTATTAAACAAAGTACCCAATTGTTAAACAGGCAGACAGGAGTGTAT  
>HPV74\_Alpha\_27462483\_nt7601\_Genome\_Tile\_rc|1  
TGCTTTTAAAGTTGGCTACCAACTACAAAAATGTATTAAACAAAGTACCCAATTGTTAAA  
>HPV74\_Alpha\_27462483\_nt7741\_Genome\_Tile\_rc|1  
GGTAAATTTGTTATTATGTATAATAAGGAAGTGCAGAGGGCGTGTGTTAACCGATACCGG  
>HPV69\_Alpha\_6970418\_nt0061\_Genome\_Tile\_rc|1  
CTCTGGGATCTTGAAACATAGCTGGTTTTGTGTATGGCTGTGTCTTTTACTTTTATATGC  
>HPV69\_Alpha\_6970418\_nt1021\_Genome\_Tile\_rc|1  
CTGCGCTACCTGTTGCTCTGCCCCATCACTAATATTACTATCATCTATAAATCCAATTAG  
>HPV69\_Alpha\_6970418\_nt1341\_Genome\_Tile\_rc|1  
GCTCCTATGTCCACCTCCATGTCTGATACAGATCCACTTGACCCCCCTGACTACACACA  
>HPV69\_Alpha\_6970418\_nt1361\_Genome\_Tile\_rc|1  
TGGTTACACTACTTGCCTGTGCTCCTATGTCCACCTCCATGTCTGATACAGATCCACTTG  
>HPV69\_Alpha\_6970418\_nt1661\_Genome\_Tile\_rc|1  
ATTTTTTAATTGTTGCTCTATTTTTTGGCACATGTAAATCGTATTAGCATTAGTGGTAGTA  
>HPV69\_Alpha\_6970418\_nt2121\_Genome\_Tile\_rc|1  
AGAAATCTTGCTATGTCCTTCCACGTTCTCCATCTTCTATTTTTGAACACCTATGTTGT  
>HPV69\_Alpha\_6970418\_nt2141\_Genome\_Tile\_rc|1  
AATTAACATTTTGATATCTTAGAAATCTTGCTATGTCCTTCCACGTTCTCCATCTTCTA  
>HPV69\_Alpha\_6970418\_nt2541\_Genome\_Tile\_rc|1  
ATAACTGTTACTCTACTATGTAAATACATTAATGAATTGTCGTCCTTGTGGATTAATGTTT  
>HPV69\_Alpha\_6970418\_nt2981\_Genome\_Tile\_rc|1  
CACATACAATTCATAACACGTGTCTCTCATAGTCCATTTCTCTTTTCCATATTCTGAATT  
>HPV69\_Alpha\_6970418\_nt3001\_Genome\_Tile\_rc|1  
AAACAGTGTTTTGGCTCTGTACATACAATTCATAACACGTGTCTCTCATAGTCCATTTT  
>HPV69\_Alpha\_6970418\_nt3141\_Genome\_Tile\_rc|1  
TCCCCTTATAATCCACTTCTCCATTTGTTTTACACCATCCCATATCTGTTTTATAATACA  
>HPV69\_Alpha\_6970418\_nt3181\_Genome\_Tile\_rc|1  
TCCACATAGTACTGTTTACAACACCCATGCATATAGTATATCCCCTTATAATCCACTTCT  
>HPV69\_Alpha\_6970418\_nt3201\_Genome\_Tile\_rc|1  
TTAACGCCTCTTGTTTAAAGTCCACATAGTACTGTTTACAACACCCATGCATATAGTATA  
>HPV69\_Alpha\_6970418\_nt3741\_Genome\_Tile\_rc|1  
GTGGTATCTTAACAGTTGTAAGAAAAGTAGCACGTTGTGTTTCACTATCAAATGTAATTG  
>HPV69\_Alpha\_6970418\_nt3801\_Genome\_Tile\_rc|1  
TGTATATATGTTACACTATAGATTACAATGACATTATACCCAATGTTGATGTTATACTCT  
>HPV69\_Alpha\_6970418\_nt4041\_Genome\_Tile\_rc|1  
CAAAAATGCAGGTATATAAAACAAACAAATATATACAAAAACGTAGCTGTAAATGATGT  
>HPV69\_Alpha\_6970418\_nt4081\_Genome\_Tile\_rc|1  
ATAAACCATTAGGTAGTAAAATTACAGCATAAAAATGTAACAAAAATGCAGGTATATAAA

>HPV69\_Alpha\_6970418\_nt4101\_Genome\_Tile\_rc|1  
CCATTATGAAGTGTGTTTATTTATAAACCATTAGGTAGTAAAATTACAGCATAAAAATGTAA  
>HPV69\_Alpha\_6970418\_nt4121\_Genome\_Tile\_rc|1  
TCGTGATGCACGAACAGCCACCATTATGAAGTGTGTTTATTTATAAACCATTAGGTAGTAAA  
>HPV69\_Alpha\_6970418\_nt4461\_Genome\_Tile\_rc|1  
TAGGAAATGGAGATCCAGATTGTATAATACTTGATTCTTCTACTAAAGTAACTATGGAAG  
>HPV69\_Alpha\_6970418\_nt4561\_Genome\_Tile\_rc|1  
CTGGTAACGTGTACAGTTCCAGGGGAGGGGGTAATATCTAACACAGCAGGGGTTGTAGTA  
>HPV69\_Alpha\_6970418\_nt4581\_Genome\_Tile\_rc|1  
ATGGGTTTTGTATATTTGTGCTGGTAACGTGTACAGTTCCAGGGGAGGGGGTAATATCTA  
>HPV69\_Alpha\_6970418\_nt4621\_Genome\_Tile\_rc|1  
TCTCCAGACTGAGGAATATCTACAGGTGGTTCAATATATAATGGGTTTTGTATATTTGTG  
>HPV69\_Alpha\_6970418\_nt4641\_Genome\_Tile\_rc|1  
TAAAAATGTGTCCCTAAAGCCTCTCCAGACTGAGGAATATCTACAGGTGGTTCAATATATA  
>HPV69\_Alpha\_6970418\_nt4661\_Genome\_Tile\_rc|1  
ACCGGCAGTAGATGTGCTAGTAAAAATGTGTCCCTAAAGCCTCTCCAGACTGAGGAATATC  
>HPV69\_Alpha\_6970418\_nt4901\_Genome\_Tile\_rc|1  
TGCAGAAAATGTGAGGGTAGTGTCCATAGGTTTCATATGCAGGATTATCAAAGGTAATAAA  
>HPV69\_Alpha\_6970418\_nt4921\_Genome\_Tile\_rc|1  
TCAGGGGCCACGTGGCTATCTGCAGAAAATGTGAGGGTAGTGTCCATAGGTTTCATATGCA  
>HPV69\_Alpha\_6970418\_nt5121\_Genome\_Tile\_rc|1  
TAATTAAAGGTTGTAATTCATAGCTTCTCTGTAGCATGTATAGGACTTATGTCATGAT  
>HPV69\_Alpha\_6970418\_nt5141\_Genome\_Tile\_rc|1  
TGTAGAGTGCTGTTCTGAAGTAATTAAGGTTGTAATTCATAGCTTCTCTGTAGCATG  
>HPV69\_Alpha\_6970418\_nt5161\_Genome\_Tile\_rc|1  
GCATAAACATCAAACAATGGTGTAGAGTGCTGTTCTGAAGTAATTAAGGTTGTAATTC  
>HPV69\_Alpha\_6970418\_nt5181\_Genome\_Tile\_rc|1  
TAGGGGCAGGGTCAGCATCAGCATAAACATCAAACAATGGTGTAGAGTGCTGTTCTGAAG  
>HPV69\_Alpha\_6970418\_nt5201\_Genome\_Tile\_rc|1  
AGTAGATGGAAATGTAAATGTAGGGGCAGGGTCAGCATCAGCATAAACATCAAACAATGG  
>HPV69\_Alpha\_6970418\_nt5221\_Genome\_Tile\_rc|1  
CTAGGGATTGTAGTAGGTGTAGTAGATGGAAATGTAAATGTAGGGGCAGGGTCAGCATCA  
>HPV69\_Alpha\_6970418\_nt5241\_Genome\_Tile\_rc|1  
AAAATATTGTAGAAGAAAATCTAGGGATTGTAGTAGGTGTAGTAGATGGAAATGTAAATG  
>HPV69\_Alpha\_6970418\_nt5261\_Genome\_Tile\_rc|1  
GGGTGCACTACTAGTGGTTGAAAATATTGTAGAAGAAAATCTAGGGATTGTAGTAGGTGT  
>HPV69\_Alpha\_6970418\_nt5281\_Genome\_Tile\_rc|1  
AGAGGTATGGTAACATTTAAGGGTGCACTACTAGTGGTTGAAAATATTGTAGAAGAAAAT  
>HPV69\_Alpha\_6970418\_nt5301\_Genome\_Tile\_rc|1  
GTATATCAAATGATGTAGATAGAGGTATGGTAACATTTAAGGGTGCACTACTAGTGGTTG  
>HPV69\_Alpha\_6970418\_nt5321\_Genome\_Tile\_rc|1  
GTCAGGGCCGTTATATATAGGTATATCAAATGATGTAGATAGAGGTATGGTAACATTTAA  
>HPV69\_Alpha\_6970418\_nt5361\_Genome\_Tile\_rc|1  
GAATATAAGGCCATGTGGAAGAAGGTACAGGAGCATAAATGTCAGGGCCGTTATATATAG  
>HPV69\_Alpha\_6970418\_nt7181\_Genome\_Tile\_rc|1  
AACACATTCATTGTTTATTAAATAACAAGCATGCAGTAAACCACACAAACAGGAAAACAC  
>HPV69\_Alpha\_6970418\_nt7201\_Genome\_Tile\_rc|1  
GAGGAAGAAATAACAAATACAACACATTCATTGTTTATTAAATAACAAGCATGCAGTAAA  
>HPV69\_Alpha\_6970418\_nt7221\_Genome\_Tile\_rc|1  
TTACTTCCCTATACCCTACGGAGGAAGAAATAACAAATACAACACATTCATTGTTTATTA  
>HPV69\_Alpha\_6970418\_nt7241\_Genome\_Tile\_rc|1  
CACCTAAACACTACCTAAGTTACTTCCCTATACCCTACGGAGGAAGAAATAACAAATAC  
>HPV69\_Alpha\_6970418\_nt7401\_Genome\_Tile\_rc|1  
TGCAACTATTGTTAAAAGATATGTGAGTAATGTAGGTGAGCCACGTCTAGGCAAGCCAAG  
>HPV69\_Alpha\_6970418\_nt7541\_Genome\_Tile\_rc|1

TTGTTAAAAGGAATGTGTCAGACATATAGTTGGCATAAAACAGTAAAACTGCTAGCCAAC  
>HPV91\_Alpha\_22023568\_nt0041\_Genome\_Tile\_rc|1  
TAGTACAAGCATAATAATTGTTACTAATAACCACAAAGAATGTAAGGTGTGCAGCGACCG  
>HPV91\_Alpha\_22023568\_nt0381\_Genome\_Tile\_rc|1  
GTTACTGCTAATGCCGCGTACTTAAAATGCCTATATTGGCTTATTTTACCATAAAATTTT  
>HPV91\_Alpha\_22023568\_nt0421\_Genome\_Tile\_rc|1  
GCACAACCTCGAATACAGTTTGTGTGTTTCTTCCTCTACTGTTACTGCTAATGCCGCGTA  
>HPV91\_Alpha\_22023568\_nt0441\_Genome\_Tile\_rc|1  
TGGCACTTACAACAGCGAATGCACAACCTCGAATACAGTTTGTGTGTTTCTTCCTCTACT  
>HPV91\_Alpha\_22023568\_nt0461\_Genome\_Tile\_rc|1  
CTATAGGCGACAATGGCTTGTGGCACTTACAACAGCGAATGCACAACCTCGAATACAGTTT  
>HPV91\_Alpha\_22023568\_nt0521\_Genome\_Tile\_rc|1  
CCTTCCACGCGTTACTTATGTAAAAAAGTGGGCTTTTGCACAATGTGCTGCACCTTTT  
>HPV91\_Alpha\_22023568\_nt0541\_Genome\_Tile\_rc|1  
CCAGCAGTGTAGGCAATATCCCTTCCACGCGTTACTTATGTAAAAAAGTGGGCTTTTGTG  
>HPV91\_Alpha\_22023568\_nt1681\_Genome\_Tile\_rc|1  
CATCGGCATGTAACCCATTGGGTATGTAGGTATAATGTTTGTCTTTTAATAACATATGG  
>HPV91\_Alpha\_22023568\_nt1841\_Genome\_Tile\_rc|1  
GGCTCTAAACCAAACAGTGTCTGGAGCGCTTTGTAATTTTGGAGGCTGTATCAATAT  
>HPV91\_Alpha\_22023568\_nt3581\_Genome\_Tile\_rc|1  
TTCGAATGCTTAGGGATGATTTCGTGGGTCTCTACTGTCCAATGGGCTCTCCTCCAACAGTT  
>HPV91\_Alpha\_22023568\_nt3821\_Genome\_Tile\_rc|1  
GGAATTTTTTACATTAGCTAAAAACGCCTCCCTTTGTTGTACACTAGCATATGTTAATGTA  
>HPV91\_Alpha\_22023568\_nt3841\_Genome\_Tile\_rc|1  
AACAATGTTTAATTGTTGTGGGAATTTTTACATTAGCTAAAAACGCCTCCCTTTGTTGTA  
>HPV91\_Alpha\_22023568\_nt3861\_Genome\_Tile\_rc|1  
CATAATTGTTAAAAATCCTAAACAATGTTTAATTGTTGTGGGAATTTTTACATTAGCTAA  
>HPV91\_Alpha\_22023568\_nt3921\_Genome\_Tile\_rc|1  
ACAGTTCCACTATACAAGCAATATACAAGGTAGTTTTACAAATTCATAGGGTACTATTTA  
>HPV91\_Alpha\_22023568\_nt3941\_Genome\_Tile\_rc|1  
ACACCCTTAACGTCACAGTAACAGTTCCACTATACAAGCAATATACAAGGTAGTTTTACA  
>HPV91\_Alpha\_22023568\_nt4041\_Genome\_Tile\_rc|1  
CAATTATGCAAACAAGCACATTAACTAATAAAATGCCAAGCTTTACATCTATTAACAAAA  
>HPV91\_Alpha\_22023568\_nt4161\_Genome\_Tile\_rc|1  
ATATAAACACGTTAGTAAGTGATATAAGTGCAGACCAAGATAAAAAGTAAAGTATAGAAG  
>HPV91\_Alpha\_22023568\_nt4181\_Genome\_Tile\_rc|1  
AAACCACACTACAAGTATTAATATAAACACGTTAGTAAGTGATATAAGTGCAGACCAAGA  
>HPV91\_Alpha\_22023568\_nt4201\_Genome\_Tile\_rc|1  
TGTAATAAAAAGGGCCGGTACAAACCACACTACAAGTATTAATATAAACACGTTAGTAAGT  
>HPV91\_Alpha\_22023568\_nt4221\_Genome\_Tile\_rc|1  
TGTAATATGTAATATGTAAATGTAAATAAAAGGGCCGGTACAAACCACACTACAAGTATTA  
>HPV91\_Alpha\_22023568\_nt4281\_Genome\_Tile\_rc|1  
ATGCTAGGTACAAATATATGCACACCAATGTATTTACAATTGCTGTGTTCAATTTGCAA  
>HPV91\_Alpha\_22023568\_nt4301\_Genome\_Tile\_rc|1  
CAAATTGACAAGTTAACATAATGCTAGGTACAAATATATGCACACCAATGTATTTACAAT  
>HPV91\_Alpha\_22023568\_nt4421\_Genome\_Tile\_rc|1  
AATTTGTTTATTTGCTGGAGGGCAGCAGCTTAACGTTCCTATAATGAAACACTAATAACA  
>HPV91\_Alpha\_22023568\_nt4701\_Genome\_Tile\_rc|1  
CACTAACTTTAGGAACAGTACCTGTGCGACCTGTTGGAATAGGTACATAGCCTGTTCTTC  
>HPV91\_Alpha\_22023568\_nt4821\_Genome\_Tile\_rc|1  
TTGTGATTGGAGCCCCGACTCAATTATACTTGATTCTTCAATTAATGAAACAATGGAAG  
>HPV91\_Alpha\_22023568\_nt4881\_Genome\_Tile\_rc|1  
AAATGGCTGGGACATCTGACCCAGATGATGTTACCTCAAAACCACCATGGGATGGTATAG  
>HPV91\_Alpha\_22023568\_nt4901\_Genome\_Tile\_rc|1  
TGTTGTTGGTGACACATCTAAAATGGCTGGGACATCTGACCCAGATGATGTTACCTCAAA

>HPV91\_Alpha\_22023568\_nt5061\_Genome\_Tile\_rc|1  
CAACAAATGTATCCATAGGAATGTCTTCTGCACTATGGGCTGTAATAGTAGATTGGGAAA  
>HPV91\_Alpha\_22023568\_nt5481\_Genome\_Tile\_rc|1  
TAACAGTAGAATGTCCTAGGGGCTGTAATTCAATAGATTCCTGTGTTGCAATTGGACTAA  
>HPV91\_Alpha\_22023568\_nt5501\_Genome\_Tile\_rc|1  
GTCAGTGGCATCAGGAACATTAACAGTAGAATGTCCTAGGGGCTGTAATTCAATAGATTC  
>HPV91\_Alpha\_22023568\_nt5521\_Genome\_Tile\_rc|1  
TCTGCATAAAATATCATACAAGTCAGTGGCATCAGGAACATTAACAGTAGAATGTCCTAGG  
>HPV91\_Alpha\_22023568\_nt5541\_Genome\_Tile\_rc|1  
GTACATCTAAAATGCTATCATCTGCATAAAATATCATACAAGTCAGTGGCATCAGGAACAT  
>HPV91\_Alpha\_22023568\_nt5561\_Genome\_Tile\_rc|1  
CACATTGGTGTGTTGGTATGAGGTACATCTAAAATGCTATCATCTGCATAAAATATCATACAA  
>HPV91\_Alpha\_22023568\_nt5601\_Genome\_Tile\_rc|1  
CTGTAGTGTAAACAATTTTTGTTGTGTTAGGCAGTGTAGACACATTGGTGTGTTGGTATGAG  
>HPV91\_Alpha\_22023568\_nt5621\_Genome\_Tile\_rc|1  
AGGTACTGTTGCAAGTGGGACTGTAGTGTAAACAATTTTTGTTGTGTTAGGCAGTGTAGA  
>HPV91\_Alpha\_22023568\_nt5701\_Genome\_Tile\_rc|1  
GACGGTGACAATGGCACATAGGGGACACTAAGTGGCACTGTAGGAAATGTAATATCAGGT  
>HPV91\_Alpha\_22023568\_nt5721\_Genome\_Tile\_rc|1  
ATACTGCAGAAGGTGTAACAGACGGTGACAATGGCACATAGGGGACACTAAGTGGCACTG  
>HPV91\_Alpha\_22023568\_nt5761\_Genome\_Tile\_rc|1  
AACAAATGAAGGATGTAAATAAAAATCTGTGCCATATATTGATACTGCAGAAGGTGTAACA  
>HPV91\_Alpha\_22023568\_nt6001\_Genome\_Tile\_rc|1  
AAACTTTTAGGAACAATTACTTTACCAGAATTATTTTTTATAGGAAAAAAGGGTGGCCCA  
>HPV91\_Alpha\_22023568\_nt6561\_Genome\_Tile\_rc|1  
CCTACGTAAAAAGAAAAATAAACTATTTCCGTATGGCTCGGCTGCCATTCTTAAATAATC  
>HPV91\_Alpha\_22023568\_nt6641\_Genome\_Tile\_rc|1  
CCTGCAATATACAAATCCTTAGGGACAGCATCGCCTGTAGTACCAGCCCTATTAAAGAAA  
>HPV91\_Alpha\_22023568\_nt6661\_Genome\_Tile\_rc|1  
TGTTTCGCCCTGTTGCCTGTTCCCTGCAATATACAAATCCTTAGGGACAGCATCGCCTGTAG  
>HPV91\_Alpha\_22023568\_nt6681\_Genome\_Tile\_rc|1  
ATAATATATACTGCCTGCTATGTTTCGCCCTGTTGCCTGTTCCCTGCAATATACAAATCCTT  
>HPV91\_Alpha\_22023568\_nt6861\_Genome\_Tile\_rc|1  
TAGCACAGACTCAGTGGATGCACACAAGGTTAAGTTAGTGCTGCGAGTTGTATCCACAAC  
>HPV91\_Alpha\_22023568\_nt6881\_Genome\_Tile\_rc|1  
GTGTTGTCATATGTAGTAGGTAGCACAGACTCAGTGGATGCACACAAGGTTAAGTTAGTG  
>HPV91\_Alpha\_22023568\_nt6901\_Genome\_Tile\_rc|1  
TTAAATATTCTTTGAACTTTGTGTTGTGCATATGTAGTAGGTAGCACAGACTCAGTGGATG  
>HPV91\_Alpha\_22023568\_nt7001\_Genome\_Tile\_rc|1  
AATGATGCATCCATAGTGTGGATGTATGTCATTACCTCTGGATTAAAGTGTATAATGCAT  
>HPV91\_Alpha\_22023568\_nt7081\_Genome\_Tile\_rc|1  
CCTTATTAGCCAAAAAGCGATAAGTATCCTCTAGTGATGCCGTGGCTGGAGGGGATACCC  
>HPV91\_Alpha\_22023568\_nt7141\_Genome\_Tile\_rc|1  
TATAGTTTTTGTATGGGTCCTCTTTGGCTTTTGGTGGGACATTTTTTTGACAGGCAATTG  
>HPV91\_Alpha\_22023568\_nt7341\_Genome\_Tile\_rc|1  
CAACATACAGTAATATAATAGTTATCGCTTAGTTTTCTTTTCGTTTGGAGGCAGGCGCTGA  
>HPV91\_Alpha\_22023568\_nt7381\_Genome\_Tile\_rc|1  
CATGTATACAAACCACATACAATAACACAAATGCACATACACAACATACAGTAATATAATA  
>HPV91\_Alpha\_22023568\_nt7441\_Genome\_Tile\_rc|1  
TATTCCTCATTCATACAGCACACATAACACACATGTATAAATACATAAATACACACACA  
>HPV91\_Alpha\_22023568\_nt7581\_Genome\_Tile\_rc|1  
CTAAACCCCAACGCTGCCCAACGCTGGACATTCATAACACAAAACAGGAAAGAAACACA  
>HPV91\_Alpha\_22023568\_nt7601\_Genome\_Tile\_rc|1  
CGCCATGACTACCACCAGACCTAAACCCCAACGCTGCCCAACGCTGGACATTCATAACA  
>HPV91\_Alpha\_22023568\_nt7621\_Genome\_Tile\_rc|1

ACTTTTTGTAACCAAACAGACGCCATGACTACCACCAGACCTAAACCCCAACGCTGCCCC  
>HPV91\_Alpha\_22023568\_nt7741\_Genome\_Tile\_rc|1  
CCAAAGGGAAATTATACTGTGCCAACATATTTTGGCAGGTCAATGTAACCTTGCAATTAT  
>HPV91\_Alpha\_22023568\_nt7841\_Genome\_Tile\_rc|1  
GTATGTGGTTAAAAGTAATAAAACCTTAGACAACACAAAGGTAAAAAGGTAAAATTTATA  
>HPV91\_Alpha\_22023568\_nt7861\_Genome\_Tile\_rc|1  
TAAGCAAAGCCATAAAACATGTATGTGGTTAAAAGTAATAAAACCTTAGACAACACAAAG  
>HPV91\_Alpha\_22023568\_nt7881\_Genome\_Tile\_rc|1  
ATGTGAGCCAAAAAAGCTTTTAAGCAAAGCCATAAAACATGTATGTGGTTAAAAGTAATA  
>HPV91\_Alpha\_22023568\_nt7901\_Genome\_Tile\_rc|1  
TTTATGGGTGCTTTATTGTTATGTGAGCCAAAAAAGCTTTTAAGCAAAGCCATAAAACAT  
>HPV35\_Alpha\_333050\_nt0061\_Genome\_Tile\_rc|1  
TCCTGAAACATACCGCACCTTACAATGTCTGTCCACTTCTGCTTTTTTGTGCACTTCTGC  
>HPV35\_Alpha\_333050\_nt0081\_Genome\_Tile\_rc|1  
TGTAAGGTCGTTTCAGCTGGGTCCTGAAACATACCGCACCTTACAATGTCTGTCCACTTCT  
>HPV35\_Alpha\_333050\_nt0141\_Genome\_Tile\_rc|1  
CACAATTCAAACAAATTTTCATGGATGCTTCTTCTACCTCGTTGCACAAATCATGCAGTT  
>HPV35\_Alpha\_333050\_nt0161\_Genome\_Tile\_rc|1  
TAATTCTTGTTCGAGTATACACAATTCAAACAAATTTTCATGGATGCTTCTTCTACCTC  
>HPV35\_Alpha\_333050\_nt0361\_Genome\_Tile\_rc|1  
ATACACCTAATTAATAAATGACATAACTGTTTGTTCATTGTTTTTCTAACGTTTCTCCA  
>HPV35\_Alpha\_333050\_nt0461\_Genome\_Tile\_rc|1  
CATACACCGACCTGTCCACCGTCCACCGATGTTATGGAATCGTTTTTTTTCTTCTAAATG  
>HPV35\_Alpha\_333050\_nt0481\_Genome\_Tile\_rc|1  
CGTGTGTTGGTTTCCAACAGGACATACACCGACCTGTCCACCGTCCACCGATGTTATGGAAT  
>HPV35\_Alpha\_333050\_nt0501\_Genome\_Tile\_rc|1  
ATTACACCTCGGTTTCTCTACGTGTTGGTTTCCAACAGGACATACACCGACCTGTCCACC  
>HPV35\_Alpha\_333050\_nt0701\_Genome\_Tile\_rc|1  
GTAGTGTGCGCTCACATTTACAACAGGACGTTACAATATTATAATTGGAGGTGTCTGGTT  
>HPV35\_Alpha\_333050\_nt0721\_Genome\_Tile\_rc|1  
TGTGCTCTGTACACACAGACGTAGTGTGCGCTCACATTTACAACAGGACGTTACAATATT  
>HPV35\_Alpha\_333050\_nt0921\_Genome\_Tile\_rc|1  
TCATTTTCGTCCTCTACACTGGATCCCGTACGTCTACTAACTACTGCTTCTACAAAAAAC  
>HPV35\_Alpha\_333050\_nt0981\_Genome\_Tile\_rc|1  
TTTAATATATCTGTATCATTTTATAAAGTCCACCATATCCTCCCCCTGTCACAGTCATCT  
>HPV35\_Alpha\_333050\_nt1001\_Genome\_Tile\_rc|1  
TCTCTGTTTCTGCCTGTATGTTTAAATATATCTGTATCATTTTATAAAGTCCACCATATCCT  
>HPV35\_Alpha\_333050\_nt1121\_Genome\_Tile\_rc|1  
TGTTATTATTAAACACATAAGCTCACGCTGCTAAGTGGACTACTAGCATACTTTCGTTTTA  
>HPV35\_Alpha\_333050\_nt1141\_Genome\_Tile\_rc|1  
AGCTTTTAAACGTGGACTTATGTTATTATTAAACACATAAGCTCACGCTGCTAAGTGGACT  
>HPV35\_Alpha\_333050\_nt1161\_Genome\_Tile\_rc|1  
TTTTTATTTTCAATGCAAATAGCTTTTAAACGTGGACTTATGTTATTATTAAACACATAAG  
>HPV35\_Alpha\_333050\_nt1281\_Genome\_Tile\_rc|1  
CCCATACTACATTGTTCAACTGTATCATGCCCCCTCTACCTGTTGTATCTCGTGTATTTCC  
>HPV35\_Alpha\_333050\_nt1301\_Genome\_Tile\_rc|1  
AGGTTATACTATCCCCACTGCCCATACTACATTGTTCAACTGTATCATGCCCCCTCTACCT  
>HPV35\_Alpha\_333050\_nt1321\_Genome\_Tile\_rc|1  
ATGTCTTTCATCGCTACTAGAGGTTATACTATCCCCACTGCCCATACTACATTGTTCAAC  
>HPV35\_Alpha\_333050\_nt1361\_Genome\_Tile\_rc|1  
ATTTTAGTATTTGTATTATGTCTCGCGTTGGAGTCTCATCATGTCTTTCATCGCTACTAG  
>HPV35\_Alpha\_333050\_nt1381\_Genome\_Tile\_rc|1  
AGCTGCGTTTGCATTACTACATTTTAGTATTTGTATTATGTCTCGCGTTGGAGTCTCATC  
>HPV35\_Alpha\_333050\_nt1441\_Genome\_Tile\_rc|1  
AAATGGTCTAATAAGTTCTGTAAAACTAATACCAAATAGTTCTTTAAATTTAGCCAACAT

>HPV35\_Alpha\_333050\_nt1461\_Genome\_Tile\_rc|1  
CATGTGGATTTATCACTCTTAAATGGTCTAATAAGTTCTGTAAACTAATACCAAATAGT  
>HPV35\_Alpha\_333050\_nt1521\_Genome\_Tile\_rc|1  
ATATGTTTAAAGTTCGCCACACTTGGGGCTATTCCAAATGCGGCCACACCAATCTGTA  
>HPV35\_Alpha\_333050\_nt1581\_Genome\_Tile\_rc|1  
AATGCTAGAATTACCATAGCCCCATGAACACGATAAACATTGTATATGTATACATATGTT  
>HPV35\_Alpha\_333050\_nt1601\_Genome\_Tile\_rc|1  
TTTCGACTTTAAATCGTAATAATGCTAGAATTACCATAGCCCCATGAACACGATAAACAT  
>HPV35\_Alpha\_333050\_nt1621\_Genome\_Tile\_rc|1  
TTTCAATTGTTGTTCTCGTTTTTCGACTTTAAATCGTAATAATGCTAGAATTACCATAGC  
>HPV35\_Alpha\_333050\_nt1641\_Genome\_Tile\_rc|1  
AGCAATTTAGCATCAATAGTTTTCAATTGTTGTTCTCGTTTTTCGACTTTAAATCGTAAT  
>HPV35\_Alpha\_333050\_nt1661\_Genome\_Tile\_rc|1  
TACTTGCAGCTGAAATACATAGCAATTTAGCATCAATAGTTTTCAATTGTTGTTCTCGTT  
>HPV35\_Alpha\_333050\_nt1681\_Genome\_Tile\_rc|1  
TTTTGGTGGTGTATTAGCATACTTGCAGCTGAAATACATAGCAATTTAGCATCAATAGT  
>HPV35\_Alpha\_333050\_nt2161\_Genome\_Tile\_rc|1  
ATTTTTTTTAGGCACACCATGTAAAAAATTTTTTAGTGCAGATAAAAAATGCCACAAAATC  
>HPV35\_Alpha\_333050\_nt2181\_Genome\_Tile\_rc|1  
GCTCCATATATTAGTATGCAATTTTTTTTAGGCACACCATGTAAAAAATTTTTTAGTGCA  
>HPV35\_Alpha\_333050\_nt2241\_Genome\_Tile\_rc|1  
ATAGCTCCTTGTAAGAAATGCATTAGACTCATTCCAAATAATGATTTACCTGTGTTTGGT  
>HPV35\_Alpha\_333050\_nt2421\_Genome\_Tile\_rc|1  
ATTATATGCACTATGCTTAATGCTTTACATCTAAATGAAATATAGGATTTCCATCTAGTG  
>HPV35\_Alpha\_333050\_nt2481\_Genome\_Tile\_rc|1  
AAGTATGGCCACCTGTCTATCTTTGCCTGCATTTATATTGATGTAATAAGTAAAGGTGGGC  
>HPV35\_Alpha\_333050\_nt2761\_Genome\_Tile\_rc|1  
ACTGCACATTCAAGACGAATCAGTTTCCAATACTGTATGTGATCAGACAAACATGTGCTA  
>HPV35\_Alpha\_333050\_nt2921\_Genome\_Tile\_rc|1  
TTGCAGTGTCCAGTCCTCTGTGCTATACTCAGTTGTATTTAATGTCTCTAACATTAATTG  
>HPV35\_Alpha\_333050\_nt2961\_Genome\_Tile\_rc|1  
ATCTTGTAGGAAGTGTGTATATAGTTCAATACTTGTTTCTTGCAGTGTCCAGTCCTCTG  
>HPV35\_Alpha\_333050\_nt2981\_Genome\_Tile\_rc|1  
ATAAACATCTTTTTTTTAAACATCTTGTAAGAACTGTTGTATATAGTTCAATACTTGTTTC  
>HPV35\_Alpha\_333050\_nt3001\_Genome\_Tile\_rc|1  
TCAAATTGTGCTTCCACAGTATAAACATCTTTTTTTTAAACATCTTGTAAGAACTGTTGTA  
>HPV35\_Alpha\_333050\_nt3021\_Genome\_Tile\_rc|1  
TAGTATTTTTGTTTATCACCATCAAATTGTGCTTCCACAGTATAAACATCTTTTTTTTAAAC  
>HPV35\_Alpha\_333050\_nt3041\_Genome\_Tile\_rc|1  
TGTCCAATTAGTATAATGCATAGTATTTTGTTTATCACCATCAAATTGTGCTTCCACAGT  
>HPV35\_Alpha\_333050\_nt3061\_Genome\_Tile\_rc|1  
TCCTCTAATATATATATATGTGTCCAATTAGTATAATGCATAGTATTTTGTTTATCACCA  
>HPV35\_Alpha\_333050\_nt3081\_Genome\_Tile\_rc|1  
TTACAACAGTACATATACTGTCCTCTAATATATATATATGTGTCCAATTAGTATAATGCA  
>HPV35\_Alpha\_333050\_nt3101\_Genome\_Tile\_rc|1  
TTTATAATTTACCAGTCCCTTTACAACAGTACATATACTGTCCTCTAATATATATATATG  
>HPV35\_Alpha\_333050\_nt3121\_Genome\_Tile\_rc|1  
TGATGCACATAATAAATACCTTTATAATTTACCAGTCCCTTTACAACAGTACATATACTG  
>HPV35\_Alpha\_333050\_nt3141\_Genome\_Tile\_rc|1  
CATAATATGTTTCTACACCTGATGCACATAATAAATACCTTTATAATTTACCAGTCCCT  
>HPV35\_Alpha\_333050\_nt3161\_Genome\_Tile\_rc|1  
AGCCTCTTCCCTAAAAGTAACATAATATGTTTCTACACCTGATGCACATAATAAATACC  
>HPV35\_Alpha\_333050\_nt3301\_Genome\_Tile\_rc|1  
GTCTCGGTGGTGTGTAGGCGTGTAGCTGTGTAGCAATTTACAGCAGTGGATAGTTCTGTG  
>HPV35\_Alpha\_333050\_nt3321\_Genome\_Tile\_rc|1

CGGAGCAGGCTTTGGTATGGGTCTCGGTGGTGTGTAGGCGTGTAGCTGTGTAGCAATTT  
>HPV35\_Alpha\_333050\_nt3401\_Genome\_Tile\_rc|1  
TCGCTTGGTGGGGTTGTAGGGGAGCTCGGTACCCCTCGAAGTCGTTTGTGATTTGTCTT  
>HPV35\_Alpha\_333050\_nt3421\_Genome\_Tile\_rc|1  
TCCACGGCACTGAGTCGCACTCGCTTGGTGGGGTTGTAGGGGAGCTCGGTACCCCTCGA  
>HPV35\_Alpha\_333050\_nt3441\_Genome\_Tile\_rc|1  
AGACCCCTCTGTCAACACTGTCCACGGCACTGAGTCGCACTCGCTTGGTGGGGTTGTAGG  
>HPV35\_Alpha\_333050\_nt3481\_Genome\_Tile\_rc|1  
CTACCACACCGGTCTTTGTTTGTGCAGTCAGATGTAGAGTAGACCCCTCTGTCAACACTG  
>HPV35\_Alpha\_333050\_nt3501\_Genome\_Tile\_rc|1  
TAGGTGTAGTTGTACTACAACACTACCACACCGGTCTTTGTTTGTGCAGTCAGATGTAGAGT  
>HPV35\_Alpha\_333050\_nt3581\_Genome\_Tile\_rc|1  
ATCTTGATACAATGCTTTATATTTACCCAATCTATATCTTGAACACTTTAATGTATTTGC  
>HPV35\_Alpha\_333050\_nt3621\_Genome\_Tile\_rc|1  
TTTTATCGTTTGTACATGTCCATCTCCATGTAGATGAAGCATCTTGATACAATGCTTTAT  
>HPV35\_Alpha\_333050\_nt3661\_Genome\_Tile\_rc|1  
TATTCTGTTGTGTAAGTTAATGTTACAATTGCTATTTGTTTTTATCGTTTGTACATGTC  
>HPV35\_Alpha\_333050\_nt3681\_Genome\_Tile\_rc|1  
TTAAAAATTTATCCCTTTGATATTCTGTTGTGTAAGTTAATGTTACAATTGCTATTTGTT  
>HPV35\_Alpha\_333050\_nt3701\_Genome\_Tile\_rc|1  
GTTAGGTATTTTACTGTAGTTAAAAATTTATCCCTTTGATATTCTGTTGTGTAAGTTAA  
>HPV35\_Alpha\_333050\_nt3761\_Genome\_Tile\_rc|1  
CAGTACTGGAAGCTGTAAGGTCTATCATATAGACATATATCCTTTAGACACTGTAAGTGT  
>HPV35\_Alpha\_333050\_nt3781\_Genome\_Tile\_rc|1  
CAACAAAAAGCACAGCAACACAGTACTGGAAGCTGTAAGGTCTATCATATAGACATATAT  
>HPV35\_Alpha\_333050\_nt3861\_Genome\_Tile\_rc|1  
AATATTAATGCTGAGTATAATGACACAGATAGCAATAGCGAACGTACAAGCAGACACAAG  
>HPV35\_Alpha\_333050\_nt3921\_Genome\_Tile\_rc|1  
CAAGAAACAACAAAAGCAAGTAGTGGTGTGCTACAGTAACCCACAGTATTAAAACAGT  
>HPV35\_Alpha\_333050\_nt3941\_Genome\_Tile\_rc|1  
TCCATAGGTATATACAAAAGCAAGAAACAACAAAAGCAAGTAGTGGTGTGCTACAGTAA  
>HPV35\_Alpha\_333050\_nt3961\_Genome\_Tile\_rc|1  
TTGTGCATGAGCGTTAATCATCCATAGGTATATACAAAAGCAAGAAACAACAAAAGCAAG  
>HPV35\_Alpha\_333050\_nt3981\_Genome\_Tile\_rc|1  
AATTACTGTACTGCCAAATATTGTGCATGAGCGTTAATCATCCATAGGTATATACAAAAG  
>HPV35\_Alpha\_333050\_nt4021\_Genome\_Tile\_rc|1  
ACACACATGTTACACAGTACCAAACACAATGTTTGTATACAATTACTGTACTGCCAAATA  
>HPV35\_Alpha\_333050\_nt4041\_Genome\_Tile\_rc|1  
ACAAAAAATAAAACCACCATACACACATGTTACACAGTACCAAACACAATGTTTGTATAC  
>HPV35\_Alpha\_333050\_nt4101\_Genome\_Tile\_rc|1  
TTAAAAACACAGAAATAAAATGTTTAAAAACAGTAAAAAACAAAATATACAATGAACA  
>HPV35\_Alpha\_333050\_nt4121\_Genome\_Tile\_rc|1  
TATACCATGTGATCAATTTATTA AAAACACAGAAATAAAATGTTTAAAAACAGTAAAAA  
>HPV35\_Alpha\_333050\_nt4141\_Genome\_Tile\_rc|1  
GACCTTTTGTGTCGCATGGTTATACCATGTGATCAATTTATTA AAAACACAGAAATAAAA  
>HPV35\_Alpha\_333050\_nt4541\_Genome\_Tile\_rc|1  
GGTTATTGTAAACCTGTTGTAGGTGGGACCCCTGGTGTAAACAAGGGGCACCAGACTC  
>HPV35\_Alpha\_333050\_nt4561\_Genome\_Tile\_rc|1  
GGTGTGGTATCTGTAGATGTGGTTATTGTAAAACCTGTTGTAGGTGGGACCCCTGGTGTGA  
>HPV35\_Alpha\_333050\_nt4601\_Genome\_Tile\_rc|1  
ATTATCATGTGTACTTATGGATGTCACATCTAAAATAGCAGGTGTGGTATCTGTAGATGT  
>HPV35\_Alpha\_333050\_nt4761\_Genome\_Tile\_rc|1  
TGCTATTAGTTATATTATTGCTGTCTGTGGAAACAATAAAAGTATCCATAGGGATTTCTT  
>HPV35\_Alpha\_333050\_nt4941\_Genome\_Tile\_rc|1  
TAATATCCTCATGCTCAAATTGTAAGGTTGTATCAGGGTTAAGGCCTTCATATGCAGGAT



>HPV35\_Alpha\_333050\_nt4961\_Genome\_Tile\_rc|1  
GTCAGGATCCGGAGCTAAGCTAATATCCTCATGCTCAAATTGTAAGGTTGTATCAGGGTT  
>HPV35\_Alpha\_333050\_nt5061\_Genome\_Tile\_rc|1  
TTCGTGTATGCATAGTACGTTTATTACCTACTCTACTATATCTAATAGTGCCTTTCCTAG  
>HPV35\_Alpha\_333050\_nt5081\_Genome\_Tile\_rc|1  
TGCCCCATATAGCTTTTCCACTTCGTGTATGCATAGTACGTTTATTACCTACTCTACTATA  
>HPV35\_Alpha\_333050\_nt5141\_Genome\_Tile\_rc|1  
TAAGGGTTGTAATTCTATATCTTCAGTAATACTACTTAAATCCTGATAATAATGTACCCG  
>HPV35\_Alpha\_333050\_nt5161\_Genome\_Tile\_rc|1  
AAAGAGGATGGTACATGTTGTAAGGGTTGTAATTCTATATCTTCAGTAATACTACTTAAA  
>HPV35\_Alpha\_333050\_nt5181\_Genome\_Tile\_rc|1  
TTGAAACAGTGGTATGTGGTAAAGAGGATGGTACATGTTGTAAGGGTTGTAATTCTATAT  
>HPV35\_Alpha\_333050\_nt5201\_Genome\_Tile\_rc|1  
CATACCATCATTTAATGATGTTGAAACAGTGGTATGTGGTAAAGAGGATGGTACATGTTG  
>HPV35\_Alpha\_333050\_nt5221\_Genome\_Tile\_rc|1  
ATAGGAGCATAAATATCAAACATACCATCATTTAATGATGTTGAAACAGTGGTATGTGGT  
>HPV35\_Alpha\_333050\_nt5241\_Genome\_Tile\_rc|1  
TAATATCTTCCTCAGTATCTATAGGAGCATAAATATCAAACATACCATCATTTAATGATG  
>HPV35\_Alpha\_333050\_nt5261\_Genome\_Tile\_rc|1  
GTTAGAAGATGCTGAAAATATAATATCTTCCTCAGTATCTATAGGAGCATAAATATCAAA  
>HPV35\_Alpha\_333050\_nt5281\_Genome\_Tile\_rc|1  
GATGTAGTATATAAAGTATTGTTAGAAGATGCTGAAAATATAATATCTTCCTCAGTATCT  
>HPV35\_Alpha\_333050\_nt5301\_Genome\_Tile\_rc|1  
TAGGAACATATGCAGTGTTAGATGTAGTATATAAAGTATTGTTAGAAGATGCTGAAAATA  
>HPV35\_Alpha\_333050\_nt5321\_Genome\_Tile\_rc|1  
TAATGGTATAGTAGTATTGCTAGGAACATATGCAGTGTTAGATGTAGTATATAAAGTATT  
>HPV35\_Alpha\_333050\_nt5381\_Genome\_Tile\_rc|1  
AGTATTAGAGTTAAATACAATGTCTGGCCCTGCTGTTATAGGAATATCATAGCCACTACT  
>HPV35\_Alpha\_333050\_nt5421\_Genome\_Tile\_rc|1  
ATATAGGACCTGTGGGTACCGGTAGTACAGAGTTAGTAATAGTATTAGAGTTAAATACAA  
>HPV35\_Alpha\_333050\_nt5461\_Genome\_Tile\_rc|1  
GGGTGTAAATAAAAGTCACCCCATCTGCAATAATAGAATATATAGGACCTGTGGGTACC  
>HPV35\_Alpha\_333050\_nt5701\_Genome\_Tile\_rc|1  
GTACTGCTATTTTATTAGAATCTTGTTTTTTAATAGCATAGTATGGGTGACCCACAGCTA  
>HPV35\_Alpha\_333050\_nt5721\_Genome\_Tile\_rc|1  
TTGCAACCAGATACCTTGGGTACTGCTATTTTATTAGAATCTTGTTTTTTAATAGCATA  
>HPV35\_Alpha\_333050\_nt5961\_Genome\_Tile\_rc|1  
GCATTCCTGTTATCTGTACCAGAGTTACCAGAGTTACCAACATATTTATTAAGATTTTC  
>HPV35\_Alpha\_333050\_nt6101\_Genome\_Tile\_rc|1  
GTGTTTAGTAACCTCAAAGGAGGACATTCTCCTGCTTTTACCTGGTTAGCATTACAAGGT  
>HPV35\_Alpha\_333050\_nt6201\_Genome\_Tile\_rc|1  
ACTGCATATATCTAGGGGAACATCACTTTTATTAGCTTGTAAATGTAGTAAAATCCATTGC  
>HPV35\_Alpha\_333050\_nt6381\_Genome\_Tile\_rc|1  
ACTAGGCAATGTGCCAGTGGTACCCTTAATATATAGGTCTGCAGGTACTGTTTCACCTAC  
>HPV35\_Alpha\_333050\_nt6401\_Genome\_Tile\_rc|1  
GGAGTAGGAAAATAACTAGTACTAGGCAATGTGCCAGTGGTACCCTTAATATATAGGTCT  
>HPV35\_Alpha\_333050\_nt6581\_Genome\_Tile\_rc|1  
TATGTACTGTCACTAGAAGACACAGCAGAACACACAGACATATTTGTACTACGGGTTGTA  
>HPV35\_Alpha\_333050\_nt6821\_Genome\_Tile\_rc|1  
TTTGGTGCACCTGGGTTTTTGGACAAGTTACAGCCTGTGATGTTACATAGCGATATGTGTCC  
>HPV35\_Alpha\_333050\_nt6841\_Genome\_Tile\_rc|1  
TTAATGGATCATCTTTAGGTTTTTGGTGCACCTGGGTTTTTGGACAAGTTACAGCCTGTGATG  
>HPV35\_Alpha\_333050\_nt6961\_Genome\_Tile\_rc|1  
ATCTAAAATTAGGCCTGGCCTTTAGTCCTGCTTGTAACAAAAATTTACGGCCCCAACGGAA  
>HPV35\_Alpha\_333050\_nt6981\_Genome\_Tile\_rc|1

TGGAGCTGCACGCCTGCCTAATCTAAAAATTAGGCCTGGCCTTTAGTCCTGCTTGTAACAA  
>HPV35\_Alpha\_333050\_nt7001\_Genome\_Tile\_rc|1  
GATTTTTTTAGATGTAGATGCTGGAGCTGCACGCCTGCCTAATCTAAAAATTAGGCCTGGCC  
>HPV35\_Alpha\_333050\_nt7141\_Genome\_Tile\_rc|1  
TACACACATTTACACGCCATGTACAACACAAACAGGCACCACAACACATAATATATATAC  
>HPV35\_Alpha\_333050\_nt7201\_Genome\_Tile\_rc|1  
TACTGAACTACTACACACTAAGTACAAAAACACCCACGTACAACACATTGCACAATATTA  
>HPV35\_Alpha\_333050\_nt7221\_Genome\_Tile\_rc|1  
CACACACATCACTTTATGGCTACTGAACTACTACACACTAAGTACAAAAACACCCACGTA  
>HPV35\_Alpha\_333050\_nt7241\_Genome\_Tile\_rc|1  
AATACAGTGTTAATTATAAACACACACATCACTTTATGGCTACTGAACTACTACACACTA  
>HPV35\_Alpha\_333050\_nt7281\_Genome\_Tile\_rc|1  
AATTATGTAAGCTCATATCGGTGCACCATAGTCATACAACAATACAGTGTTAATTATAAA  
>HPV35\_Alpha\_333050\_nt7301\_Genome\_Tile\_rc|1  
ACACAATATAGCTGTCATGTAATTATGTAAGCTCATATCGGTGCACCATAGTCATACAAC  
>HPV35\_Alpha\_333050\_nt7481\_Genome\_Tile\_rc|1  
TTGGCAAAAGCCAATATAAAGTTGGCAAAACAATATATATCAGGAACACAAGGATTAAGTG  
>HPV35\_Alpha\_333050\_nt7501\_Genome\_Tile\_rc|1  
AGATGAATCAAGTTTAAAGATTGGCAAAAGCCAATATAAAGTTGGCAAAACAATATATATC  
>HPV35\_Alpha\_333050\_nt7561\_Genome\_Tile\_rc|1  
ACTGTTACAAGTGTTACAAGTGTGGGTGGACCACAAGTATGAAAAATGACTAATACTGCA  
>HPV35\_Alpha\_333050\_nt7641\_Genome\_Tile\_rc|1  
TTGGCAAAACACACATAATATGTAAAGCCAAGGTGTGCAATTAAAGCCCTTTAGAAATGCA  
>HPV35\_Alpha\_333050\_nt7681\_Genome\_Tile\_rc|1  
CATGTTTTAACTTAAAGTTGGCAGGATGTGTAGGGTGGTGTGGCAAAACACACATAATAT  
>HPV35\_Alpha\_333050\_nt7721\_Genome\_Tile\_rc|1  
CATATAACAATGTGTAATACAGTGAGTAATGTTTTACATGCATGTTTTAACTTAAAGTTG  
>HPV35\_Alpha\_333050\_nt7741\_Genome\_Tile\_rc|1  
CGGTTGGACACACCTGTGTGCATATAACAATGTGTAATACAGTGAGTAATGTTTTACATG  
>HPV35\_Alpha\_333050\_nt7761\_Genome\_Tile\_rc|1  
TATAAAACTGTAATCCAAATCGGTTGGACACACCTGTGTGCATATAACAATGTGTAATAC  
>HPVcand86\_Alpha\_15741127\_nt1361\_Genome\_Tile\_rc|1  
CTACTACCCACTCTGCACATGTGGACCTATCACTTTTGAAGTGTCTTACTAGGTCCTTAA  
>HPVcand86\_Alpha\_15741127\_nt1541\_Genome\_Tile\_rc|1  
TTAGTATGGTTCCTAGGCACTTTGCTACGGTTTCTCTGCTTTTGTACACTTAAACCGTA  
>HPVcand86\_Alpha\_15741127\_nt2401\_Genome\_Tile\_rc|1  
GACGACCATTTCGACTTCTAAGATATTTAAAGGTGTCATCTGCTGCAATATTTACATTTGT  
>HPVcand86\_Alpha\_15741127\_nt2421\_Genome\_Tile\_rc|1  
CACTTTTGTAGAAACGGAAAGACGACCATTCGACTTCTAAGATATTTAAAGGTGTCATCT  
>HPVcand86\_Alpha\_15741127\_nt3681\_Genome\_Tile\_rc|1  
ACTACTATTATATGCACATTGACATAATGCCTTGTGTTACCACAATTCCTTTAGGTATAT  
>HPVcand86\_Alpha\_15741127\_nt3701\_Genome\_Tile\_rc|1  
GGATATAATGTTTACAAACAACACTACTATTATATGCACATTGACATAATGCCTTGTGTTAC  
>HPVcand86\_Alpha\_15741127\_nt3721\_Genome\_Tile\_rc|1  
CTACAATTGGCTCACATACAGGATATAATGTTTACAAACAACACTACTATTATATGCACATT  
>HPVcand86\_Alpha\_15741127\_nt3761\_Genome\_Tile\_rc|1  
CAGGATGCAGTATATACCAGGTATGTAATACACACAATTGCTACAATTGGCTCACATACA  
>HPVcand86\_Alpha\_15741127\_nt4081\_Genome\_Tile\_rc|1  
AATAACAAAACCAATATGCTCATATCCCCACGGTCAAACAACACAATATCATATCCACCC  
>HPVcand86\_Alpha\_15741127\_nt4101\_Genome\_Tile\_rc|1  
AAATAATAGCAATCAATAGTAATAACAAAACCAATATGCTCATATCCCCACGGTCAAACA  
>HPVcand86\_Alpha\_15741127\_nt4121\_Genome\_Tile\_rc|1  
GCGTATGAATAACAACAGCAAAATAATAGCAATCAATAGTAATAACAAAACCAATATGCT  
>HPVcand86\_Alpha\_15741127\_nt4141\_Genome\_Tile\_rc|1  
CACACCTACACATGTAACATGCGTATGAATAACAACAGCAAAATAATAGCAATCAATAGT

>HPVcand86\_Alpha\_15741127\_nt4161\_Genome\_Tile\_rc|1  
AACCAAAATACAAAACCTATACACACCTACACATGTAACATGCGTATGAATAACAACAGCA  
>HPVcand86\_Alpha\_15741127\_nt4761\_Genome\_Tile\_rc|1  
CTTCATATGTGTGGGTCCCTGAGGTGGCAGTACTAGACAATACATGTCCAGTAATGTCAC  
>HPVcand86\_Alpha\_15741127\_nt5241\_Genome\_Tile\_rc|1  
CCTGGCCAGAGGCCTGGCCAGAGGATGTGGTAGCACCCAACGGCTGCAGTTCAATATCCT  
>HPVcand86\_Alpha\_15741127\_nt5281\_Genome\_Tile\_rc|1  
GATAGGTGTGTATCATCTGCATAAATGTCATATAAGGTATCCTGGCCAGAGGCCTGGCCA  
>HPVcand86\_Alpha\_15741127\_nt5301\_Genome\_Tile\_rc|1  
AAGGCTCCTGTAATATAGAGGATAGGTGTGTATCATCTGCATAAATGTCATATAAGGTAT  
>HPVcand86\_Alpha\_15741127\_nt5321\_Genome\_Tile\_rc|1  
GGAATGCAATGAGGGAACGGAAGGCTCCTGTAATATAGAGGATAGGTGTGTATCATCTGC  
>HPVcand86\_Alpha\_15741127\_nt5341\_Genome\_Tile\_rc|1  
GCAGAGGATACAGGCGTGGTGGAAATGCAATGAGGGAACGGAAGGCTCCTGTAATATAGAG  
>HPVcand86\_Alpha\_15741127\_nt5361\_Genome\_Tile\_rc|1  
TAGATGTGGCGGACACTGTAGCAGAGGATACAGGCGTGGTGGAAATGCAATGAGGGAACGG  
>HPVcand86\_Alpha\_15741127\_nt5401\_Genome\_Tile\_rc|1  
GATAAGGGAACAGTAACATTATCATATGTGGAAGATACCATAGATGTGGCGGACACTGTA  
>HPVcand86\_Alpha\_15741127\_nt5421\_Genome\_Tile\_rc|1  
AGGGAACCTCGGTTGCAGATGATAAGGGAACAGTAACATTATCATATGTGGAAGATACCA  
>HPVcand86\_Alpha\_15741127\_nt5441\_Genome\_Tile\_rc|1  
AATATCAGGACCAGTATATAAGGGAACCTCGGTTGCAGATGATAAGGGAACAGTAACATT  
>HPVcand86\_Alpha\_15741127\_nt7161\_Genome\_Tile\_rc|1  
TACACAATACAGACACACATACAAAACAAGACAGTACAGCACACACACTATTTTTTAGT  
>HPVcand86\_Alpha\_15741127\_nt7181\_Genome\_Tile\_rc|1  
CACAGTGCAACCAACAACAGTACACAATACAGACACACATACAAAACAAGACAGTACAGCA  
>HPVcand86\_Alpha\_15741127\_nt7241\_Genome\_Tile\_rc|1  
ATAAAGGACATTACACAACACATACAAAAAACACATACATATACACATACATATACACAA  
>HPVcand86\_Alpha\_15741127\_nt7281\_Genome\_Tile\_rc|1  
AAATACACAACAAGACAAAAGCACACAATACAGGGGCACATAAAGGACATTACACAACA  
>HPVcand86\_Alpha\_15741127\_nt7301\_Genome\_Tile\_rc|1  
CCATAAATACATACACACCAAAATACACAACAAGACAAAAGCACACAATACAGGGGCAC  
>HPVcand86\_Alpha\_15741127\_nt7461\_Genome\_Tile\_rc|1  
GCATACAAAATGGAGTACGGGTACAAAATAACTGCAGGAAATGGTGGATATGTAGCCGAG  
>HPVcand86\_Alpha\_15741127\_nt7781\_Genome\_Tile\_rc|1  
GAGTTGTGTTGGTTACATAAGTTGTTTAAAGTTTATAGGACAGAAACTTGGCAGTACAA  
>HPVcand86\_Alpha\_15741127\_nt7821\_Genome\_Tile\_rc|1  
TGTTAAGTATAAAGAAGGAACCTATGAATAATACAGCGACCGAGTTGTGTTGGTTACATAA  
>HPV6\_Alpha\_6002612\_nt0261\_Genome\_Tile\_rc|1  
TTTCCATGAAATTCCTAGGCAGCACGCGCAGGCTGCATATGGATAGCCGCCTCGAAACAGG  
>HPV6\_Alpha\_6002612\_nt0281\_Genome\_Tile\_rc|1  
AGTGTCTATATTGGTTAATTTTTCCATGAAATTCCTAGGCAGCACGCGCAGGCTGCATATG  
>HPV6\_Alpha\_6002612\_nt0341\_Genome\_Tile\_rc|1  
CGTCTAAAATGTCTTGTTTAGTTTCTTCTTCAACAGTTGTTGCATATCCAGCATAATCAA  
>HPV6\_Alpha\_6002612\_nt0361\_Genome\_Tile\_rc|1  
CAGGTAGCACCGAATTAGCACGTCTAAAATGTCTTGTTTAGTTTCTTCTTCAACAGTTGT  
>HPV6\_Alpha\_6002612\_nt0441\_Genome\_Tile\_rc|1  
CACGTACAATTTAGCTTTTATGAACCGTGCCTTGGTTAGTATATGTTTTACCTTTTCTACT  
>HPV6\_Alpha\_6002612\_nt0741\_Genome\_Tile\_rc|1  
CACTATGTTAGTTGTTCCCAACAGAAGCTGTTGCACTTCTCTGATGTCTGTTTCTGTACA  
>HPV6\_Alpha\_6002612\_nt2081\_Genome\_Tile\_rc|1  
GCCTTCTATTTTAGAACCCCTATGTTTTATCCATTGTTTTATAGACATCTTCCTCATTTTC  
>HPV6\_Alpha\_6002612\_nt2521\_Genome\_Tile\_rc|1  
CTAGTATGTAAATACTTATATTTCTTCTTTGGTAATATCTATGTTGGATGTTACTAGC  
>HPV6\_Alpha\_6002612\_nt2961\_Genome\_Tile\_rc|1

ATAACTTGTCTTCTTGTAAATGTCCACGGTTCCTACTATACTCAGTCTTTAATAATGATTC  
>HPV6\_Alpha\_6002612\_nt3041\_Genome\_Tile\_rc|1  
TTTGCACAGCCATCAAATTTAACTTCTACAGTTTTGCCCCGTTTTTTAAACAGCGTTTA  
>HPV6\_Alpha\_6002612\_nt3061\_Genome\_Tile\_rc|1  
CCACATAATCCATTGTATTGTTTGCACAGCCATCAAATTTAACTTCTACAGTTTTGCCCC  
>HPV6\_Alpha\_6002612\_nt3121\_Genome\_Tile\_rc|1  
CTACCATACTATGCACCTTTACCCAGGAGTCAGTGTCTGCACATACACATCTGTCCATA  
>HPV6\_Alpha\_6002612\_nt3481\_Genome\_Tile\_rc|1  
GGTCGTGATTGTTAGTGATGACGTTGTGGTTTCCACTGTCCACGGGTCCAATGTGGGCCA  
>HPV6\_Alpha\_6002612\_nt3741\_Genome\_Tile\_rc|1  
TTTGTGTCTAATAGTAGGGGGTATTTTACAACATTTAAAACTGTTGCCTTTGTTCCCTC  
>HPV6\_Alpha\_6002612\_nt3761\_Genome\_Tile\_rc|1  
TGCATTGACATAAACCCCAAGTTTGTGTCTAATAGTAGGGGGTATTTTACAACATTTAAA  
>HPV6\_Alpha\_6002612\_nt3781\_Genome\_Tile\_rc|1  
TATATACAAATTACAATAGGTGCATTGACATAAACCCCAAGTTTGTGTCTAATAGTAGGGG  
>HPV6\_Alpha\_6002612\_nt3841\_Genome\_Tile\_rc|1  
GTACCACTTCCATACATGTACAGTTGTATTACACCAATACCATATATTTACACATTTACA  
>HPV6\_Alpha\_6002612\_nt3861\_Genome\_Tile\_rc|1  
TCCTGCAGCTATTTGTACAGGTACCACTTCCATACATGTACAGTTGTATTACACCAATAC  
>HPV6\_Alpha\_6002612\_nt3881\_Genome\_Tile\_rc|1  
AGTATTAATGTGCTGGTTGTTTCTGCAGCTATTTGTACAGGTACCACTTCCATACATGTA  
>HPV6\_Alpha\_6002612\_nt3961\_Genome\_Tile\_rc|1  
ATGTGTACACAATAAAGTCAGATATCCATACAATAAGTATGATGCTAACAAAACATACAA  
>HPV6\_Alpha\_6002612\_nt3981\_Genome\_Tile\_rc|1  
CAGTGTAGTACTAGCACAGATGTGTACACAATAAAGTCAGATATCCATACAATAAGTAT  
>HPV6\_Alpha\_6002612\_nt4001\_Genome\_Tile\_rc|1  
CACAAATAGTAAGTATAAAAAGCAGTGTTAGTACTAGCACAGATGTGTACACAATAAAGTCA  
>HPV6\_Alpha\_6002612\_nt4061\_Genome\_Tile\_rc|1  
GGACAGTAACACACAAGTAAAGTTAGTAGGAAAAATTGCAAGGGGGTGTGTTAATAGCAGC  
>HPV6\_Alpha\_6002612\_nt4081\_Genome\_Tile\_rc|1  
AGTGGTGTATATAACAAGCGGGACAGTAACACACAAGTAAAGTTAGTAGGAAAAATTGCA  
>HPV6\_Alpha\_6002612\_nt4101\_Genome\_Tile\_rc|1  
TTGCTGTGTGTTTACAATGTAGTGGTGTATATAACAAGCGGGACAGTAACACACAAGTAA  
>HPV6\_Alpha\_6002612\_nt4121\_Genome\_Tile\_rc|1  
AAATTGACATGTTAGCATCATTGCTGTGTGTTTACAATGTAGTGGTGTATATAACAAGCG  
>HPV6\_Alpha\_6002612\_nt4141\_Genome\_Tile\_rc|1  
AGCCAGGTATCTCCATCATTAATGACATGTTAGCATCATTGCTGTGTGTTTACAATGT  
>HPV6\_Alpha\_6002612\_nt4201\_Genome\_Tile\_rc|1  
TAGTGCAATTAATAAACCCTACACCCCTACAATAAAGGCACATAACAACCACAAACCC  
>HPV6\_Alpha\_6002612\_nt4221\_Genome\_Tile\_rc|1  
TATCGCCTTGTACAGCTCTATAGTGCATTAATAAACCCTACACCCCTACAATAAAGG  
>HPV6\_Alpha\_6002612\_nt4261\_Genome\_Tile\_rc|1  
TTACAGTTGTGTTTGTACACTTGTACATTTGGTGTGTTTATCGCCTTGTACAGCTCTA  
>HPV6\_Alpha\_6002612\_nt4301\_Genome\_Tile\_rc|1  
ATCACCAGCAGTATCATAATGCATAGTTACATAATCATCATTACAGTTGTGTTTGTACAA  
>HPV6\_Alpha\_6002612\_nt4361\_Genome\_Tile\_rc|1  
ATACAAAGCATACACTGTTACAAATATAAAAAAGTTTTACTCTAATTCATATATATATA  
>HPV6\_Alpha\_6002612\_nt4621\_Genome\_Tile\_rc|1  
GGCCCACTAGTAATAAGGTTTTGTCAGAAGTTCCTAAGGGAACATAGCCAGTACGACCC  
>HPV6\_Alpha\_6002612\_nt4741\_Genome\_Tile\_rc|1  
TGTGCAGGGGCACAATTTTCAGGCGCCCTGCGTTAATGATTGCCGATTCTTCAATTAAA  
>HPV6\_Alpha\_6002612\_nt4761\_Genome\_Tile\_rc|1  
ATGTAATTGTAAACCCACCGTGTGCAGGGGGCACAATTTTCAGGCGCCCTGCGTTAATGA  
>HPV6\_Alpha\_6002612\_nt4801\_Genome\_Tile\_rc|1  
ACTGATACATCCAATATTGCAGGGGTAGTTGTTTCAGAGGATGTAATTGTAAACCCACCG

>HPV6\_Alpha\_6002612\_nt4821\_Genome\_Tile\_rc|1  
TAGTAGTAGTATGACTAGTAAGTACATCCAATATTGCAGGGGTAGTTGTTTCAGAGG  
>HPV6\_Alpha\_6002612\_nt4841\_Genome\_Tile\_rc|1  
GACAGGATTTCTAAATATACTAGTAGTAGTACTAGTAAGTACATCCAATATTGC  
>HPV6\_Alpha\_6002612\_nt4941\_Genome\_Tile\_rc|1  
TTTCCTCTATAGGGTGTGACGTTATAGTGGGTGCAGAAATTAATATATGTCCATTAGCCT  
>HPV6\_Alpha\_6002612\_nt4981\_Genome\_Tile\_rc|1  
CCGCTATCACTAGAGGATATCACAAAAGTATCTAAAGGAATTTCTCTATAGGGTGTGAC  
>HPV6\_Alpha\_6002612\_nt5341\_Genome\_Tile\_rc|1  
ATAGGTGAAATATCATAAAAATAATGAATGCGGGCCCCTATGTGCTTTCCGCTGCGAGTG  
>HPV6\_Alpha\_6002612\_nt5481\_Genome\_Tile\_rc|1  
TTAAATATGTATCTGATATATTTGTAACAGGGTGTGGGTAGGGTTAATGTCAGGTTCAA  
>HPV6\_Alpha\_6002612\_nt5521\_Genome\_Tile\_rc|1  
GTGTTACCCACGGTGTGTAACTGTATTAGGTGTGGAAGTTAAATATGTATCTGATATA  
>HPV6\_Alpha\_6002612\_nt6121\_Genome\_Tile\_rc|1  
TCCCTGAATTTCAACATCATCATATTTATTTAGGAAAGGATGTCCACTTACACCCACAC  
>HPV6\_Alpha\_6002612\_nt6141\_Genome\_Tile\_rc|1  
CTGTCCAGGGTTACCACCACTCCCTGAATTTTCAACATCATCATATTTATTTAGGAAAGG  
>HPV6\_Alpha\_6002612\_nt6581\_Genome\_Tile\_rc|1  
CTCCCTACAGACGTTTCGATTTCCACTACCCCTTAATTATAAGAGTATCAGGCACAGGTTCC  
>HPV6\_Alpha\_6002612\_nt6601\_Genome\_Tile\_rc|1  
GGGTGTTAACATATATACTACTCCCTACAGACGTTTCGATTTCCACTACCCCTTAATTATAA  
>HPV6\_Alpha\_6002612\_nt6801\_Genome\_Tile\_rc|1  
CTCTTTTATAATCAGAATTGGTGTATGTGGAAGATGTAGTTACGGATGCACATAATGTCAT  
>HPV6\_Alpha\_6002612\_nt6821\_Genome\_Tile\_rc|1  
TCTTCCACATGACGCATGTACTCTTTATAATCAGAATTGGTGTATGTGGAAGATGTAGTT  
>HPV6\_Alpha\_6002612\_nt7281\_Genome\_Tile\_rc|1  
CATAACAGTACATACACACATATATATAACAGTACATATACACATATATTACCTTTTGGT  
>HPV6\_Alpha\_6002612\_nt7481\_Genome\_Tile\_rc|1  
ACAGCCACTGAGTCACAGGGTGTAAACAAGATATAACAATAATGTAGTTAATTGTTTATTGC  
>HPV6\_Alpha\_6002612\_nt7521\_Genome\_Tile\_rc|1  
ACTTATGTGTGTAAGGCGGTGCAAACCAAACGCGTGCAACAGCCACTGAGTCACAGGG  
>HPV6\_Alpha\_6002612\_nt7581\_Genome\_Tile\_rc|1  
GGTTGCAAATATAAAAATATATTATTGGAAACAAAATATATATATTGTGCATGTATATT  
>HPV6\_Alpha\_6002612\_nt7661\_Genome\_Tile\_rc|1  
CTGGCACAAAATATATAGGATTAACAGGCAACACGTTGTAACAAATTGGTGGAAGTGTA  
>HPV6\_Alpha\_6002612\_nt7761\_Genome\_Tile\_rc|1  
CAATAAACATATGAGTAAGGCAATACCGCACCCCTGGCGCCAGGTGTGTGGTTGGCAGGAT  
>HPV6\_Alpha\_6002612\_nt7781\_Genome\_Tile\_rc|1  
AGACAGGTTTATTGCAGTGGCAATAAACATATGAGTAAGGCAATACCGCACCCCTGGCGCC  
>HPV6\_Alpha\_6002612\_nt7801\_Genome\_Tile\_rc|1  
TGCATAAAAGTATAACACAAAGACAGGTTTATTGCAGTGGCAATAAACATATGAGTAAGG  
>HPV6\_Alpha\_6002612\_nt7821\_Genome\_Tile\_rc|1  
CTTTTAAGAGTTGGCTACAGTGCATAAAAGTATAACACAAAGACAGGTTTATTGCAGTGG  
>HPV6\_Alpha\_6002612\_nt7881\_Genome\_Tile\_rc|1  
TTATGTTATTGTATACCAAACAGTAAGAGCAAAAAAATGTGCTGCTACAAGCCAAAAATG  
>HPV83\_Alpha\_5059324\_nt1681\_Genome\_Tile\_rc|1  
TCGCACAATCCACTCTGGGGTCTCCCCAAGTACTTCTGAGGCATTCCCCATAGCTGTTCT  
>HPV83\_Alpha\_5059324\_nt1701\_Genome\_Tile\_rc|1  
GCATGTCCTACTACTGTTTGTGCGACAATCCACTCTGGGGTCTCCCCAAGTACTTCTGAG  
>HPV83\_Alpha\_5059324\_nt3021\_Genome\_Tile\_rc|1  
AATCCACACCCCCGACACTTTGTGCCATGTCCTTGTTTCTCCGTATATACATATATGT  
>HPV83\_Alpha\_5059324\_nt3041\_Genome\_Tile\_rc|1  
CTCATAATACAGTCCCGCGTAATCCACACCCCCGACACTTTGTGCCATGTCCTTGTTTCT  
>HPV83\_Alpha\_5059324\_nt3401\_Genome\_Tile\_rc|1

GTCAC TGCTGTGTCCGTAGGCACCACTGTCCACGTGCTTTTGGTGCTCTGTCTGGGTGA  
>HPV83\_Alpha\_5059324\_nt3441\_Genome\_Tile\_rc|1  
AACGGTTCAC TGCTGTCCCTTGTGGCGTTTGTGCAGACACTGTCACTGCTGTGTCCGTAGG  
>HPV83\_Alpha\_5059324\_nt3641\_Genome\_Tile\_rc|1  
CCTGGTTAGAAATAGCTCCCGTTGCTCTATACTTGCATAGCATAAGGTTACAAATGCTGC  
>HPV83\_Alpha\_5059324\_nt3661\_Genome\_Tile\_rc|1  
ATACCCTTTGGAATTGTAACCCTGGTTAGAAATAGCTCCCGTTGCTCTATACTTGCATAG  
>HPV83\_Alpha\_5059324\_nt3681\_Genome\_Tile\_rc|1  
TATATCCTTGCATTGCCTTTATACCCTTTGGAATTGTAACCCTGGTTAGAAATAGCTCCC  
>HPV83\_Alpha\_5059324\_nt3721\_Genome\_Tile\_rc|1  
TATATATATATACATATGTACAGTTAAAAGCACATAGACATATATCCTTGCATTGCCTTT  
>HPV83\_Alpha\_5059324\_nt3741\_Genome\_Tile\_rc|1  
CATACCCGTATTACACACTATATATATATATACATATGTACAGTTAAAAGCACATAGACA  
>HPV83\_Alpha\_5059324\_nt3761\_Genome\_Tile\_rc|1  
CACTTATACACTATTGGTTACATACCCGTATTACACACTATATATATATATACATATGTA  
>HPV83\_Alpha\_5059324\_nt3781\_Genome\_Tile\_rc|1  
GGCTCAGGTATTTGCAAACACACTTATACACTATTGGTTACATACCCGTATTACACACTA  
>HPV83\_Alpha\_5059324\_nt3801\_Genome\_Tile\_rc|1  
TATATGGTGTGGTGTATAGTGGCTCAGGTATTTGCAAACACACTTATACACTATTGGTTA  
>HPV83\_Alpha\_5059324\_nt3821\_Genome\_Tile\_rc|1  
GTAATCCAGGGTTGTACTGGTATATGGTGTGGTGTATAGTGGCTCAGGTATTTGCAAACA  
>HPV83\_Alpha\_5059324\_nt3861\_Genome\_Tile\_rc|1  
GCACAAGAAATATGACACCACAAACAAATCAAGCACAAATATGTAATCCAGGGTTGTACTGG  
>HPV83\_Alpha\_5059324\_nt3961\_Genome\_Tile\_rc|1  
ACTTGTACATATAGCAATAACAACCCCAAATACAATATACACATAAAACACAACAAATGCC  
>HPV83\_Alpha\_5059324\_nt3981\_Genome\_Tile\_rc|1  
TAAACCCATACACCACAATACTTGTACATATAGCAATAACAACCCCAAATACAATATAC  
>HPV83\_Alpha\_5059324\_nt4101\_Genome\_Tile\_rc|1  
CAATTAAATCATATGCCTGCCCCACCTCTAGCCTCCAATGGATACATAGTGATTGTAC  
>HPV83\_Alpha\_5059324\_nt4141\_Genome\_Tile\_rc|1  
AAAATAATAAGCAGTAATCCCACTTCGTCCCGCCAATAACAATTAAATCATATGCCTGC  
>HPV83\_Alpha\_5059324\_nt4161\_Genome\_Tile\_rc|1  
TAATAATTACGATGAGAATTAAATAATAAGCAGTAATCCCACTTCGTCCCGCCAATAA  
>HPV83\_Alpha\_5059324\_nt4181\_Genome\_Tile\_rc|1  
CCGCATGTACAGCAAAATAATAATAATTACGATGAGAATTAAATAATAAGCAGTAATCC  
>HPV83\_Alpha\_5059324\_nt4201\_Genome\_Tile\_rc|1  
GGTGGTTACATATGTAGTAGCCGCATGTACAGCAAAATAATAATAATTACGATGAGAATT  
>HPV83\_Alpha\_5059324\_nt4221\_Genome\_Tile\_rc|1  
TGTGGTATACAGGAAGGGGAGGTGGTTACATATGTAGTAGCCGCATGTACAGCAAAATAA  
>HPV83\_Alpha\_5059324\_nt4261\_Genome\_Tile\_rc|1  
AAGAAAGTAAAAACAAACAGTACAAAACAATACCCTACATGTGGTATACAGGAAGGGGA  
>HPV83\_Alpha\_5059324\_nt4321\_Genome\_Tile\_rc|1  
GCCCTTTTGC GCCGCTATGCACATGGGACATTGTATATATAACTATGTTTATTGCCAAT  
>HPV83\_Alpha\_5059324\_nt4421\_Genome\_Tile\_rc|1  
TAAAAACCTATCGGCCCATGTGTACCTTCAATTTTAGGGACTATATCAGGGGGGCATGT  
>HPV83\_Alpha\_5059324\_nt4721\_Genome\_Tile\_rc|1  
CGTTATATCCAATACTGCGGGGGTGTAGTGGAGGAAGTAGTAACCTCAAAGCCATGTGT  
>HPV83\_Alpha\_5059324\_nt4741\_Genome\_Tile\_rc|1  
TGTACCGTGGCGGACGACGGCGTTATATCCAATACTGCGGGGGTGTAGTGGAGGAAGTA  
>HPV83\_Alpha\_5059324\_nt5321\_Genome\_Tile\_rc|1  
GGAGGGTTCCAAGGGCTGTAGCTCAATGGACTCCGTGGGCGGAATGGGGCTAATATCATG  
>HPV83\_Alpha\_5059324\_nt5341\_Genome\_Tile\_rc|1  
TATAAGGAGGTGTTTGCCACGGAGGGTTCCAAGGGCTGTAGCTCAATGGACTCCGTGGGC  
>HPV83\_Alpha\_5059324\_nt5401\_Genome\_Tile\_rc|1  
GAGGGGGATGGCCGCAGGGGCACCGAGGACTCCAAAAAACATCATCTGCATATATGTCA

>HPV83\_Alpha\_5059324\_nt5441\_Genome\_Tile\_rc|1  
AGCAGAAACATTAGTGGACTGCAAGGACACAGAGGTGGATGAGGGGGATGGCCGCAGGGG  
>HPV83\_Alpha\_5059324\_nt5461\_Genome\_Tile\_rc|1  
TGTGCAGTCACAGCAGAGGTAGCAGAAACATTAGTGGACTGCAAGGACACAGAGGTGGAT  
>HPV83\_Alpha\_5059324\_nt5561\_Genome\_Tile\_rc|1  
AGAAGGGTCTGCAGGCATATGAGCAGCACCGTGTATGTCAGGGCCTGAAAGGGCAGGTAC  
>HPV83\_Alpha\_5059324\_nt5581\_Genome\_Tile\_rc|1  
ATATTAGATGGCACAGGAACAGAAGGGTCTGCAGGCATATGAGCAGCACCGTGTATGTCA  
>HPV83\_Alpha\_5059324\_nt5601\_Genome\_Tile\_rc|1  
TAAACACAGACTGAATAGGAATATTAGATGGCACAGGAACAGAAGGGTCTGCAGGCATAT  
>HPV83\_Alpha\_5059324\_nt5641\_Genome\_Tile\_rc|1  
AAAATGTAGTTAGGCAATAAATAATAGTCAGTACCGTCTATAAACACAGACTGAATAGGA  
>HPV83\_Alpha\_5059324\_nt6161\_Genome\_Tile\_rc|1  
CCAATGATAATAAGCTGCGTTTGTGTGTGTAATCCACTGAGACATTGTACGCCTATCTGTG  
>HPV83\_Alpha\_5059324\_nt6541\_Genome\_Tile\_rc|1  
TGTTCCCTACTATTAGCAGATGTGCCTGGAATATAATAAGAGGTAGGCAGCACCTCGCCCA  
>HPV83\_Alpha\_5059324\_nt6561\_Genome\_Tile\_rc|1  
ATAGATGTAGCTGGTAAGAGTGTTCCTACTATTAGCAGATGTGCCTGGAATATAATAAGA  
>HPV83\_Alpha\_5059324\_nt6581\_Genome\_Tile\_rc|1  
GAGCCACTAGGAGTAGGAGCATAGATGTAGCTGGTAAGAGTGTTCCTACTATTAGCAGAT  
>HPV83\_Alpha\_5059324\_nt6841\_Genome\_Tile\_rc|1  
CAGGGGTCAGATGTATTTTGCAAAGTTGCAATATAACCTGTAAGTCATATTCCTCTGTGT  
>HPV83\_Alpha\_5059324\_nt7281\_Genome\_Tile\_rc|1  
CACATACATAACACAAAGGCATACCACCGCATATAGGCATAACACTGCACAAACACAGAT  
>HPV83\_Alpha\_5059324\_nt7301\_Genome\_Tile\_rc|1  
AACACATACAACGGTACTGCCACATACATAACACAAAGGCATACCACCGCATATAGGCAT  
>HPV83\_Alpha\_5059324\_nt7321\_Genome\_Tile\_rc|1  
GCACAAACATATAATACACAAACACATACAACGGTACTGCCACATACATAACACAAAGGC  
>HPV83\_Alpha\_5059324\_nt7341\_Genome\_Tile\_rc|1  
CAGACAAAACACAGATACATGCACAAACATATAATACACAAACACATACAACGGTACTGC  
>HPV83\_Alpha\_5059324\_nt7361\_Genome\_Tile\_rc|1  
AGATACATACATACTACACAGACAAAACACAGATACATGCACAAACATATAATACACA  
>HPV83\_Alpha\_5059324\_nt7401\_Genome\_Tile\_rc|1  
AACACATACATTCCACAATGTATACATACAAAACACACAGATACATACATACTACA  
>HPV83\_Alpha\_5059324\_nt7561\_Genome\_Tile\_rc|1  
AAAAGGAAGTAGTAACCTACGGGGTCAGGAACATATAGGGTGGTGCAGGACATAGGTGCCA  
>HPV83\_Alpha\_5059324\_nt7681\_Genome\_Tile\_rc|1  
GTTGGCACAGAAAGTATGCAGGATATGAGTTAATAAGGGATTACTTACCATTGTGTGTAA  
>HPV83\_Alpha\_5059324\_nt7761\_Genome\_Tile\_rc|1  
GAAGTACAAGTACAATATAAGCCTGTCAAAAAATCATATTGTGCAGCCAACAACTGTCA  
>HPV83\_Alpha\_5059324\_nt7881\_Genome\_Tile\_rc|1  
AACTGCAGGATTACTGGATAGACACATAGTTGGCTACTGCAATAGTCTACATGTCCAAAA  
>HPV84\_Alpha\_12958167\_nt0021\_Genome\_Tile\_rc|1  
AATCGTAGGTCGTGCAACTCCACCTCGTATTCCTGGCACAGCACAAAAATATTGGTGGGG  
>HPV84\_Alpha\_12958167\_nt0441\_Genome\_Tile\_rc|1  
CTCGTCACAGTATAAACTAACTACATCTGGTATATCTGTTAAAATAATATCCTTTAACGT  
>HPV84\_Alpha\_12958167\_nt1321\_Genome\_Tile\_rc|1  
TCTTACCAGATCCATAAAGGACAGCCCAATAGTTCCTTAAATTTTCCCTAATAGTTTTAC  
>HPV84\_Alpha\_12958167\_nt1541\_Genome\_Tile\_rc|1  
AAATGCCACCTATACAGTGCCTACTGTTCCTGCTTTTGTACACTTAAAGCGCAGTA  
>HPV84\_Alpha\_12958167\_nt1561\_Genome\_Tile\_rc|1  
ACGTTTTTTCGGGTACATTTAAATGCCACCTATACAGTGCCTACTGTTCCTGCTTTT  
>HPV84\_Alpha\_12958167\_nt2361\_Genome\_Tile\_rc|1  
TCTGGATTTATGTTTGTGTATTAGTAACGGAGGACATTTTAACTGTACTAGGTTTTTA  
>HPV84\_Alpha\_12958167\_nt2421\_Genome\_Tile\_rc|1

TTGTTTAAAAAGGGAAAAATAACCATTTCGGCTGCGTAAGTATTTAAATGTGTCATCAGTT  
>HPV84\_Alpha\_12958167\_nt3001\_Genome\_Tile\_rc|1  
GGTACCTTATACCAGGTGTCCTCACTGGCACAATGTACATATATAAACCCCCAGTTTACA  
>HPV84\_Alpha\_12958167\_nt3021\_Genome\_Tile\_rc|1  
CTCTGTTGCTAATCTGTCCAGGTACCTTATACCAGGTGTCCTCACTGGCACAATGTACAT  
>HPV84\_Alpha\_12958167\_nt3041\_Genome\_Tile\_rc|1  
TTGCAGTTCATAATACAGCCCTCTGTTGCTAATCTGTCCAGGTACCTTATACCAGGTGTC  
>HPV84\_Alpha\_12958167\_nt3361\_Genome\_Tile\_rc|1  
CTGTCAACCGGCCGGTGTCTTGTGTAGAGTCGGGCTGCTGAACTGTGTCCCCCTCCGAGT  
>HPV84\_Alpha\_12958167\_nt3401\_Genome\_Tile\_rc|1  
TTTTGGGCTGTCACAGTTATTGTTTGTCTTGTGTGCAACTGTCAACCGGCCGGTGTCC  
>HPV84\_Alpha\_12958167\_nt3461\_Genome\_Tile\_rc|1  
GGATTGACCTTTTAGGTGTAGGACAGGTGCACTGTACAGTTACTGTGTCCCGTGGCCG  
>HPV84\_Alpha\_12958167\_nt3521\_Genome\_Tile\_rc|1  
CCTTTCAAACAGGTCAGGCACCGACTGGTGTAACCTATATCGAAAGCACTTAAGGCTATT  
>HPV84\_Alpha\_12958167\_nt3621\_Genome\_Tile\_rc|1  
CCAAGAGCTGTTTGCCTGGTCCGTACTTTTATACCATAGTGTACATATGATGTTTTGT  
>HPV84\_Alpha\_12958167\_nt3681\_Genome\_Tile\_rc|1  
ACATAACCATAGACATACTACCAAGTGTGGCTACAATGCCTTTTGGTATATGTACACGTG  
>HPV84\_Alpha\_12958167\_nt3721\_Genome\_Tile\_rc|1  
ATACAGCATTTACACTATACATATACAATGGGTACTGTTTACATAACCATAGACATACTA  
>HPV84\_Alpha\_12958167\_nt3761\_Genome\_Tile\_rc|1  
GGTATGTAGGACATACACAATTGTTACAAAATGGCTCAGTAATACAGCATTTACACTATAC  
>HPV84\_Alpha\_12958167\_nt4041\_Genome\_Tile\_rc|1  
GGGACCCCGTAATTGCATGGGATACATAATAGGTAGGACCGGGACTGTACAGGGATATGT  
>HPV84\_Alpha\_12958167\_nt4101\_Genome\_Tile\_rc|1  
AATAATAGTAAAAAGACCTACATCACCACGCTCAAACACCACTATGTCATACCCACCCTG  
>HPV84\_Alpha\_12958167\_nt4121\_Genome\_Tile\_rc|1  
ATAATAACAATTAAAAGCAAAATAATAGTAAAAAGACCTACATCACCACGCTCAAACACC  
>HPV84\_Alpha\_12958167\_nt4141\_Genome\_Tile\_rc|1  
GGTGGCACAGCCAAAGTAAAATAATAACAATTAAAAGCAAAATAATAGTAAAAAGACCTA  
>HPV84\_Alpha\_12958167\_nt4161\_Genome\_Tile\_rc|1  
ACTTTAAACTGCATAACACGGTGGCACAGCCAAAGTAAAATAATAACAATTAAAAGCAA  
>HPV84\_Alpha\_12958167\_nt4181\_Genome\_Tile\_rc|1  
ATGTACAAAAATACAAAAGCACTTTAAACTGCATAACACGGTGGCACAGCCAAAGTAAA  
>HPV84\_Alpha\_12958167\_nt4201\_Genome\_Tile\_rc|1  
TACCAAGTGTTTATTATAGTATGTACAAAAATACAAAAGCACTTTAAACTGCATAACAC  
>HPV84\_Alpha\_12958167\_nt4221\_Genome\_Tile\_rc|1  
TTTAAGAACCTTGGGCATGGTACCAAGTGTTTATTATAGTATGTACAAAAATACAAAAGC  
>HPV84\_Alpha\_12958167\_nt4781\_Genome\_Tile\_rc|1  
TCGTAGGTATGTGACCCGACGTGGCTGTACTAGACAACACATGACCAGTAATGTCCCCT  
>HPV84\_Alpha\_12958167\_nt4801\_Genome\_Tile\_rc|1  
AGGTTTGCATGGGGATTCTTCTCGTAGGTATGTGACCCGACGTGGCTGTACTAGACAACA  
>HPV84\_Alpha\_12958167\_nt5241\_Genome\_Tile\_rc|1  
AGCAGAGGATGATACCAGGGGCTGCAGCTCAATATCCTCAAGATGTGGTATAGGGCTAAG  
>HPV84\_Alpha\_12958167\_nt5261\_Genome\_Tile\_rc|1  
TATAATGAATCCGTAGGCACAGCAGAGGATGATACCAGGGGCTGCAGCTCAATATCCTCA  
>HPV84\_Alpha\_12958167\_nt5321\_Genome\_Tile\_rc|1  
GCAGAAACGGAAGGGGACGCAATACAGAGGACAAATGGGCATCATCTGCATATATATCA  
>HPV84\_Alpha\_12958167\_nt5401\_Genome\_Tile\_rc|1  
CAGTGACATTATCATATGTGGAGGCGGTTATGGAGGTGGCAGAAAGGTCTGCAGAGGCAA  
>HPV84\_Alpha\_12958167\_nt5441\_Genome\_Tile\_rc|1  
CCTGTATAGACGGGCACATCGGTGCCAGAAAACAACGGGACAGTGACATTATCATATGTG  
>HPV84\_Alpha\_12958167\_nt5461\_Genome\_Tile\_rc|1  
CAGAATGGTCAATATCAGGGCCTGTATAGACGGGCACATCGGTGCCAGAAAACAACGGGA



>HPV84\_Alpha\_12958167\_nt5481\_Genome\_Tile\_rc|1  
GGGAGGTGCGGAGGGAGCAGCAGAATGGTCAATATCAGGGCCTGTATAGACGGGCACATC  
>HPV84\_Alpha\_12958167\_nt6701\_Genome\_Tile\_rc|1  
GGTATTCCTTAAAATTGGTAGGTTTATATTCTGATTCCGGTGTGGTAGCAGCACTAATAG  
>HPV84\_Alpha\_12958167\_nt7141\_Genome\_Tile\_rc|1  
AGACACCAAACAAACAGACACATATTACTTTTTGGCCTTACGCCGTTTGGAGGCAGGGGG  
>HPV84\_Alpha\_12958167\_nt7161\_Genome\_Tile\_rc|1  
GACACCAAACAAACAGACACAGACACCAAACAAACAGACACATATTACTTTTTGGCCTTA  
>HPV84\_Alpha\_12958167\_nt7241\_Genome\_Tile\_rc|1  
ATACATACACATTATACATAACAGGGCACATACAGAACAGTACAAAACACATACAAAATG  
>HPV84\_Alpha\_12958167\_nt7261\_Genome\_Tile\_rc|1  
CAGGGGCACGCATTCCATAAATACATACACATTATACATAACAGGGGCACATACAGAACAG  
>HPV84\_Alpha\_12958167\_nt7301\_Genome\_Tile\_rc|1  
ACACATTCCACAAATACATGTACACAACATACACAACATACAGGGGCACGCATTCCATAA  
>HPV84\_Alpha\_12958167\_nt7421\_Genome\_Tile\_rc|1  
TTATACCCCTTAAAGGAAACAGTAGACCTACCCAGGCGTGATCATGGTGCACACTTACTCA  
>HPV84\_Alpha\_12958167\_nt7441\_Genome\_Tile\_rc|1  
TTGCATACAAAATGGAGGCTTTATACCCCTTAAAGGAAACAGTAGACCTACCCAGGCGTGT  
>HPV84\_Alpha\_12958167\_nt7581\_Genome\_Tile\_rc|1  
TAGCATATTGAAATAGCTGACAGACACCTGGGTGCGGACGTCTGCAGCTGCCTACGCA  
>HPV84\_Alpha\_12958167\_nt7621\_Genome\_Tile\_rc|1  
ATGAGTAAGTAAACCTATAAACTGTAGACAATACATTTATTAGCATATTGAAATAGCTGA  
>HPV84\_Alpha\_12958167\_nt7801\_Genome\_Tile\_rc|1  
ATTGTTGTAAAGTATAAGAAAATAGTATGAATAACATAGCAACCGAAACGGGTGTGTTAC  
>HPV84\_Alpha\_12958167\_nt7821\_Genome\_Tile\_rc|1  
CCCTATTTTTTTTACTGTATCATTGTTGTAAAGTATAAGAAAATAGTATGAATAACATAGC  
>HPV39\_Alpha\_333245\_nt1181\_Genome\_Tile\_rc|1  
TGCCTACTTTTTTTCCATACGGTCTAGTGTGCCACTGCTGTCTGTATACTTTCGTTTTTA  
>HPV39\_Alpha\_333245\_nt1221\_Genome\_Tile\_rc|1  
ACATTTAATGAAATTTCCCTGTAGTGTCCCCTGGTATTCCTGCCTACTTTTTTTCCATAC  
>HPV39\_Alpha\_333245\_nt1461\_Genome\_Tile\_rc|1  
TTGGATTGTAACAATAATTTAATTTGTGCAGTTGGAGATTTGGGATCCTGGTTTTCTACTA  
>HPV39\_Alpha\_333245\_nt1481\_Genome\_Tile\_rc|1  
GCATTGCAGCCTTTTTTGTATTGGATTGTAACAATAATTTAATTTGTGCAGTTGGAGATT  
>HPV39\_Alpha\_333245\_nt1501\_Genome\_Tile\_rc|1  
TGTTTCTTTTAAATTGTGTTAGCATTGCAGCCTTTTTTGTATTGGATTGTAACAATAATTT  
>HPV39\_Alpha\_333245\_nt1681\_Genome\_Tile\_rc|1  
TAGTACTCCTTGTGTTTGTGTCTAAGCTTTGTATATGTGTATATAAGGCATATTTGTTGAT  
>HPV39\_Alpha\_333245\_nt3181\_Genome\_Tile\_rc|1  
ATATTATTTTTTATAATATATAGCACCCCATAAATACATAGTTCATAGCATTACATTTGTCC  
>HPV39\_Alpha\_333245\_nt3281\_Genome\_Tile\_rc|1  
CGCATCTTGAATAAACACTTCATAGTATACTTTTAGGTGCTCGTTCATATAATATATACC  
>HPV39\_Alpha\_333245\_nt3301\_Genome\_Tile\_rc|1  
CCACTAGTCCCATACCTTTCCGCATCTTGAATAAACACTTCATAGTATACTTTTAGGTGC  
>HPV39\_Alpha\_333245\_nt3581\_Genome\_Tile\_rc|1  
TGTGTTGTGGCCTGTACTGTTACTGTGGAGTGGGTTGTTAAGATGGTCCAGGGACACTCC  
>HPV39\_Alpha\_333245\_nt3781\_Genome\_Tile\_rc|1  
CGTTGTGACTCTGTGGCATATGTAACAGTTAATATGCCAGCGTTTTTGGTTCCTTACCC  
>HPV39\_Alpha\_333245\_nt3861\_Genome\_Tile\_rc|1  
ATAGTATACTTTACAATGTCATGTAACCCAATGAAACATGTACACTAGAAGGTATTTTAA  
>HPV39\_Alpha\_333245\_nt3881\_Genome\_Tile\_rc|1  
AATATACATACACAATATCCATAGTATACTTTACAATGTCATGTAACCCAATGAAACATG  
>HPV39\_Alpha\_333245\_nt4121\_Genome\_Tile\_rc|1  
AGTACTATATCATATCCATTGCCAGTCTATGCAACAACCACATGGGCAATACAAAAATA  
>HPV39\_Alpha\_333245\_nt4181\_Genome\_Tile\_rc|1

TAACAAAAAAAAATATAAAAAGCTATGTACAGTAGTTATGCACAATGCACATACATATAC  
>HPV39\_Alpha\_333245\_nt4321\_Genome\_Tile\_rc|1  
ATTTTGTGTCAGCAAGTGTAGTACCCTCAACTTTATCAACAACGTCTGGTGGACAGGTACCC  
>HPV39\_Alpha\_333245\_nt4681\_Genome\_Tile\_rc|1  
TCCGTAAAGGCAGGGTTAGTATAACTAGTAGAGGTATTTGTACAGACCCAGAGGAGGGT  
>HPV39\_Alpha\_333245\_nt4701\_Genome\_Tile\_rc|1  
GAACCTCAATTAAGGAAGGATCCGTAAAGGCAGGGTTAGTATAACTAGTAGAGGTATTT  
>HPV39\_Alpha\_333245\_nt5201\_Genome\_Tile\_rc|1  
TAGGGGCTGTAATTCATGCTTTTCAGCAGGAGCAATACTACTAATGTCATGGTAATAATG  
>HPV39\_Alpha\_333245\_nt5241\_Genome\_Tile\_rc|1  
CAAATAATGCATCTGAAGCATCAGAGGGCTCAGCGTGAAGTAGGGGCTGTAATTCATGCG  
>HPV39\_Alpha\_333245\_nt5301\_Genome\_Tile\_rc|1  
CCCTTGTTATTATTAAATGCAGTATCTAAATATGTGTTATTGTCCACATCAGCATATATAT  
>HPV39\_Alpha\_333245\_nt5321\_Genome\_Tile\_rc|1  
GTTATATGTAGTGCCCGAATCCCTTGTTATTATTAAATGCAGTATCTAAATATGTGTTATT  
>HPV39\_Alpha\_333245\_nt5341\_Genome\_Tile\_rc|1  
ACAGAAGGTAGTGAGCCTGTGTTATATGTAGTGCCCGAATCCCTTGTTATTATTAAATGCA  
>HPV39\_Alpha\_333245\_nt5361\_Genome\_Tile\_rc|1  
TAGTAGATGCTGAAGAAGCCACAGAAGGTAGTGAGCCTGTGTTATATGTAGTGCCCGAAT  
>HPV39\_Alpha\_333245\_nt5381\_Genome\_Tile\_rc|1  
AATAGTTGTATTGGCATATTTAGTAGATGCTGAAGAAGCCACAGAAGGTAGTGAGCCTGT  
>HPV39\_Alpha\_333245\_nt5481\_Genome\_Tile\_rc|1  
CTATTGGTCCAGAAGGCACCAATGGCAACTGTGGAGTAGTACTTGGTAAAGCAATATCAG  
>HPV39\_Alpha\_333245\_nt5501\_Genome\_Tile\_rc|1  
GGTTATTGCATATGTTGTGTCTATTGGTCCAGAAGGCACCAATGGCAACTGTGGAGTAGT  
>HPV39\_Alpha\_333245\_nt5521\_Genome\_Tile\_rc|1  
TAATAATTGGAACCCCTGAATGGTTATTGCATATGTTGTGTCTATTGGTCCAGAAGGCACC  
>HPV39\_Alpha\_333245\_nt6461\_Genome\_Tile\_rc|1  
GAGGGGCAGTATACAGAACTACCGGGGTTTGCACGTATATCTGTGCCCTTAATATACAAT  
>HPV39\_Alpha\_333245\_nt6481\_Genome\_Tile\_rc|1  
TTACCATGGAACCGCTGGGAGAGGGGCAGTATACAGAACTACCGGGGTTTGCACGTATAT  
>HPV39\_Alpha\_333245\_nt6501\_Genome\_Tile\_rc|1  
AAATAACTGGGAATCAGAGGTTACCATGGAACCGCTGGGAGAGGGGCAGTATACAGAACT  
>HPV39\_Alpha\_333245\_nt6621\_Genome\_Tile\_rc|1  
AGAGGTAGATAATGTAAAGTTGGTACTACGGGTAGTGTCCACAACAGTAAGAAATAATTG  
>HPV39\_Alpha\_333245\_nt6641\_Genome\_Tile\_rc|1  
GAAGGTATGGAAGACTCTATAGAGGTAGATAATGTAAAGTTGGTACTACGGGTAGTGTCC  
>HPV39\_Alpha\_333245\_nt6661\_Genome\_Tile\_rc|1  
ACTTAGAAGGATCATATGTAGAAGGTATGGAAGACTCTATAGAGGTAGATAATGTAAAGT  
>HPV39\_Alpha\_333245\_nt6681\_Genome\_Tile\_rc|1  
GTGCCTGGTATATTCCTTAACTTAGAAGGATCATATGTAGAAGGTATGGAAGACTCTAT  
>HPV39\_Alpha\_333245\_nt6841\_Genome\_Tile\_rc|1  
ATCTGTAAAGTGTCTACCAAATGGCAGATGGTGGAGGAGCTACAGCAAAATTTCCAATTGT  
>HPV39\_Alpha\_333245\_nt7061\_Genome\_Tile\_rc|1  
GACGAGGAAGTGGATGCAGCAGGCCGCTTTCGGGGACCTATAGTAGGGCGCCTGCGGACC  
>HPV39\_Alpha\_333245\_nt7081\_Genome\_Tile\_rc|1  
GTTTGTGTTTAGTAGCTGAGGACGAGGAAGTGGATGCAGCAGGCCGCTTTCGGGGACCTA  
>HPV39\_Alpha\_333245\_nt7141\_Genome\_Tile\_rc|1  
ACAAACAACATACACACATAACAAGGCATACACATGCATTATTTAGACACACGTTTAC  
>HPV39\_Alpha\_333245\_nt7161\_Genome\_Tile\_rc|1  
TACACTCAACACATAAGGAAACAAACAACATACACACACATAACAAGGCATACACATGCA  
>HPV39\_Alpha\_333245\_nt7281\_Genome\_Tile\_rc|1  
AGACCTATTATATGTAAAACAAATACACTGTTAGTCACAGGGTGTGCAATCACACATGAA  
>HPV39\_Alpha\_333245\_nt7381\_Genome\_Tile\_rc|1  
AAGTATAAAATGTAGAAACGCATACAACAATGTAAAAATTACATATTAGGTAGTAAACAC

>HPV39\_Alpha\_333245\_nt7721\_Genome\_Tile\_rc|1  
GCTACATTAGTCACTTGTATAACTTATACTGTAAGACACATTCTGAATCAAAAAGTAGT  
>HPV82\_Alpha\_6970427\_nt0061\_Genome\_Tile\_rc|1  
CTCTTATGTCTTCAAACATGGTGTCTTATGTATTTTTTCGTGCTTGCTTTTATATGCACC  
>HPV82\_Alpha\_6970427\_nt0281\_Genome\_Tile\_rc|1  
CTATACCTTCTGTATTCTCTAATTCTAGAATAAAACATTAGGCATTTTTTGCATGCTGCA  
>HPV82\_Alpha\_6970427\_nt0501\_Genome\_Tile\_rc|1  
TTATTACACCTGGGTTTCACTACGTTGTCTTGGTGGTTTTCTGCAATTTGCACACTGTCC  
>HPV82\_Alpha\_6970427\_nt0941\_Genome\_Tile\_rc|1  
GTATCATTTGTATCTTCCTCCTCATCGTCTGATATATTATCTCCCGTTTTTTTGTCAACT  
>HPV82\_Alpha\_6970427\_nt0961\_Genome\_Tile\_rc|1  
AATCTATTATATCAGACCCTGTATCATTTGTATCTTCCTCCTCATCGTCTGATATATTAT  
>HPV82\_Alpha\_6970427\_nt0981\_Genome\_Tile\_rc|1  
ACTATTACTTGTATCTATAAAATCTATTATATCAGACCCTGTATCATTTGTATCTTCCTC  
>HPV82\_Alpha\_6970427\_nt1341\_Genome\_Tile\_rc|1  
TTCCAGGTCTATCTCTGTACTTCTGTCTGCTGCTCCCCCGCCACTACACATACTATGTTG  
>HPV82\_Alpha\_6970427\_nt1361\_Genome\_Tile\_rc|1  
TTGGTAGCATTTTCGTTTGTTTCCAGGTCTATCTCTGTACTTCTGTCTGCTGCTCCCCCG  
>HPV82\_Alpha\_6970427\_nt1381\_Genome\_Tile\_rc|1  
ATATACTGTTTAGTCTTACATTGGTAGCATTTTCGTTTGTTTCCAGGTCTATCTCTGTAC  
>HPV82\_Alpha\_6970427\_nt1401\_Genome\_Tile\_rc|1  
GCTACATTTTAACACTGCACATATACTGTTTAGTCCTACATTGGTAGCATTTTCGTTTGT  
>HPV82\_Alpha\_6970427\_nt1641\_Genome\_Tile\_rc|1  
AAATCTAGCTAACAGTAGCACAAATAGTACCCCAATCACATGATAGGCATTGTATATGGTA  
>HPV82\_Alpha\_6970427\_nt1661\_Genome\_Tile\_rc|1  
AGTCTGTTTTTGGCACATGTAAATCTAGCTAACAGTAGCACAAATAGTACCCCAATCACAT  
>HPV82\_Alpha\_6970427\_nt1681\_Genome\_Tile\_rc|1  
CTAAACATTTGGCAATGGTAAGTCTGTTTTTGGCACATGTAAATCTAGCTAACAGTAGCA  
>HPV82\_Alpha\_6970427\_nt2181\_Genome\_Tile\_rc|1  
TTTAAATGTTTGTATAAAATACATAAAGTTAATACCCTGGTATCGCAAAAATTTAGCTAT  
>HPV82\_Alpha\_6970427\_nt2421\_Genome\_Tile\_rc|1  
ATTTAGGAAATTTCTTAGGTACTGGTCTATATATGTCCAACAGCCATATGTGGCATCATC  
>HPV82\_Alpha\_6970427\_nt2521\_Genome\_Tile\_rc|1  
TTGGATCTTCTTTTGGATTGATATTTGAGGTAATAAGCAATGGTGGGCATACAATTTGCA  
>HPV82\_Alpha\_6970427\_nt2861\_Genome\_Tile\_rc|1  
CTACTTGATGGTTAAGGGTTTGCATGTTTCTTCTCGTGCAGTATAAAACATAGCACATT  
>HPV82\_Alpha\_6970427\_nt2881\_Genome\_Tile\_rc|1  
TGATACTGCCGATGCTGGTACTACTTGATGGTTAAGGGTTTGCATGTTTCTTCTCGTGC  
>HPV82\_Alpha\_6970427\_nt3181\_Genome\_Tile\_rc|1  
TTTGTTTACATCTGGTTTGTAAATAAATACCTGTATAGTCCACGTTTCCCTGTGTTTTTAC  
>HPV82\_Alpha\_6970427\_nt3201\_Genome\_Tile\_rc|1  
TTAAATGTTACATAATATTCTTTGTTTACATCTGGTTTGTAAATAAATACCTGTATAGTCC  
>HPV82\_Alpha\_6970427\_nt3221\_Genome\_Tile\_rc|1  
CATATTTTTTTGCTTCATCTTTAAATGTTACATAATATTCTTTGTTTACATCTGGTTTGT  
>HPV82\_Alpha\_6970427\_nt3401\_Genome\_Tile\_rc|1  
GTTGTTGTGGTGTCTGGGCTTCTGTGGTGCCCGGAGGCGGAATAGGTATTGGTCGTGG  
>HPV82\_Alpha\_6970427\_nt3721\_Genome\_Tile\_rc|1  
TTTAACAGTATCAATAAACTTTTGACGTTGGTGTGCACTGTCAAATGTAATTGTAACAAT  
>HPV82\_Alpha\_6970427\_nt3861\_Genome\_Tile\_rc|1  
TAAACACACCAAAAACACCGCAATGGTTGCGAGTAACTATATACACTTAGCAGCACATAT  
>HPV82\_Alpha\_6970427\_nt4041\_Genome\_Tile\_rc|1  
TAATAAAAAGCATGGAATATAAAAACAAATCAAGTATACAGTAAATGTAGTTAAAGGTGA  
>HPV82\_Alpha\_6970427\_nt4061\_Genome\_Tile\_rc|1  
ATAGAAAAGGTATATAAATGTAATAAAAAGCATGGAATATAAAAACAAATCAAGTATACA  
>HPV82\_Alpha\_6970427\_nt4101\_Genome\_Tile\_rc|1

AATACAAAAACATACAAAGTTTTATTGTGTAAGTTGCAAAATAGAAAAGGTATATAAATG  
>HPV82\_Alpha\_6970427\_nt4121\_Genome\_Tile\_rc|1  
GTGCAGCCACCATTGTATATAATACAAAAACATACAAAGTTTTATTGTGTAAGTTGCAAA  
>HPV82\_Alpha\_6970427\_nt4561\_Genome\_Tile\_rc|1  
TACTGTACCAGCGGAAGGTGTAATGTCTAAAACCGCAGGAGTTGTTGTAGAAGAGGAAGT  
>HPV82\_Alpha\_6970427\_nt4801\_Genome\_Tile\_rc|1  
CCTGCTATATAAACGAGGTGCAGCAATGCGGCGCACCCCAGGGGTGGGTGTACTGCTAAT  
>HPV82\_Alpha\_6970427\_nt4841\_Genome\_Tile\_rc|1  
TAATAAAGTCTGGATTAGTAACCTTAACCTGTGAAAATGCCCTGCTATATAAACGAGGTG  
>HPV82\_Alpha\_6970427\_nt4921\_Genome\_Tile\_rc|1  
AGTAGGTTCCCTCAAAGGACAATGATGTATCAGCAGGTTCAAAGCAGGATTATCAAAGT  
>HPV82\_Alpha\_6970427\_nt5261\_Genome\_Tile\_rc|1  
GTAGTTGTGTAGACAAAGGAGAAAATGGAGAGCGAAGCATAGGTGTGGTTTGTGTAGGCT  
>HPV82\_Alpha\_6970427\_nt5281\_Genome\_Tile\_rc|1  
AACAGAGGAAGACAATGAAGGTAGTTGTGTAGACAAAGGAGAAAATGGAGAGCGAAGCAT  
>HPV82\_Alpha\_6970427\_nt5301\_Genome\_Tile\_rc|1  
ACATTAGCATAAGATGAAGAAACAGAGGAAGACAATGAAGGTAGTTGTGTAGACAAAGGA  
>HPV82\_Alpha\_6970427\_nt5321\_Genome\_Tile\_rc|1  
TGGTAGAAAAAGGGATAGTAACATTAGCATAAGATGAAGAAACAGAGGAAGACAATGAAG  
>HPV82\_Alpha\_6970427\_nt5361\_Genome\_Tile\_rc|1  
AACACAACATCAGGACCCGTATGAATAGGAACATTATATGTGGTAGAAAAAGGGATAGTA  
>HPV82\_Alpha\_6970427\_nt5421\_Genome\_Tile\_rc|1  
GCATGTTGTGTGTCAATAGATGTGTGTGGAATAAAGGGCCACACAGTGGGTGAAGTAGGT  
>HPV82\_Alpha\_6970427\_nt5461\_Genome\_Tile\_rc|1  
TACGGCCACAAAGTAGTAATCCCCACCTTGTATAACAATAGCATGTTGTGTGTCAATAGA  
>HPV82\_Alpha\_6970427\_nt7041\_Genome\_Tile\_rc|1  
TACATAGGCAGGGCGAACCTATTTTTTAACCCTTTTACGTTTGGCAGACGAGGAAGCGGA  
>HPV82\_Alpha\_6970427\_nt7361\_Genome\_Tile\_rc|1  
CTGTGGTACATGCAATACAGCAAGAACATATATATACAAGTGTGCTGCAAGCCACAAATA  
>HPV82\_Alpha\_6970427\_nt7381\_Genome\_Tile\_rc|1  
GGAAAAAACAAAATGGAATCCTGTGGTACATGCAATACAGCAAGAACATATATATACAAG  
>HPV82\_Alpha\_6970427\_nt7481\_Genome\_Tile\_rc|1  
AATTAAGGGTTATGCCAAAAACATAGGTAGTGTGGTTCAAAGTTGGCAAATGTAGTCA  
>HPV82\_Alpha\_6970427\_nt7501\_Genome\_Tile\_rc|1  
TGTACATACCATGCCAAAAGAATTAAGGGTTATGCCAAAAACATAGGTAGTGTGGTTCA  
>HPV82\_Alpha\_6970427\_nt7701\_Genome\_Tile\_rc|1  
CAGAGACATTTAGTTCATGACCTGCCAAGTATGCAATTAATAAAGGCCAAAATAAGCCAAA  
>HPV51\_Alpha\_333087\_nt0061\_Genome\_Tile\_rc|1  
TCTTTCCCTCTTGTCTTCGAACATGGTGTCTTCTATACTTTTACCACTGCACTTTTATA  
>HPV51\_Alpha\_333087\_nt0281\_Genome\_Tile\_rc|1  
ACCTGCTATAACGTCTATACTCTCTAATTTTTGAATAAAACAGTAAACATTGTTTGCATA  
>HPV51\_Alpha\_333087\_nt0501\_Genome\_Tile\_rc|1  
TGGCTTTATTACACTTGGGTTTCGTACGTTGTCGTGTACGTTGCCAGCAATTAGCGCAT  
>HPV51\_Alpha\_333087\_nt0981\_Genome\_Tile\_rc|1  
ATACTAGTTTCACTATCTATAAAGTTTATTAAATCAGATCCTGTATCATCTGCATTTTCA  
>HPV51\_Alpha\_333087\_nt1161\_Genome\_Tile\_rc|1  
TGTGACTCGTTTGCCTGACTATGGCTGTGTGTGTTGTTTTGATTGTGAATGTCTCCTAAT  
>HPV51\_Alpha\_333087\_nt1341\_Genome\_Tile\_rc|1  
TCTACATTTGCACAGCTTTCTGTTGTTTCCACATCCATAACACTGCCCCCCCCGCTACTA  
>HPV51\_Alpha\_333087\_nt1621\_Genome\_Tile\_rc|1  
ACATGAAAACCTAATTAGCATTAATACAATGGTGCCCAATCACATGATAAACATTGTAT  
>HPV51\_Alpha\_333087\_nt2081\_Genome\_Tile\_rc|1  
CTCCATCCTTTGCTCTATCACATCTATACCTTATCCAGGCTGACATAGATAATGATTTTC  
>HPV51\_Alpha\_333087\_nt2101\_Genome\_Tile\_rc|1  
AGCAATTTCTCTCCAGTTGCCTCCATCCTTTGCTCTATCACATCTATACCTTATCCAGGC

>HPV51\_Alpha\_333087\_nt2121\_Genome\_Tile\_rc|1  
CCTTGATATCTTAAAAATTTAGCAATTTCTCTCCAGTTGCCTCCATCCTTTGCTCTATCA  
>HPV51\_Alpha\_333087\_nt2501\_Genome\_Tile\_rc|1  
TTAGGTTTGCATCCTCTTGTGGATTTATGTTTGACGTTATTAGTAATGGTGGACATACTA  
>HPV51\_Alpha\_333087\_nt2521\_Genome\_Tile\_rc|1  
TACCCCTGTATGTAAATACATTAGGTTTGCATCCTCTTGTGGATTTATGTTTGACGTTAT  
>HPV51\_Alpha\_333087\_nt2841\_Genome\_Tile\_rc|1  
CTGGTACTACCTGGTGATTGATTGTTTCGTAAAGTTTCTTTCCCGTGCTGCATAAAACATAG  
>HPV51\_Alpha\_333087\_nt3021\_Genome\_Tile\_rc|1  
ATATAACTGTTACAGTTATGCCCCCTTTTGTAAACATTGCTTGGGAGCCACACACCATA  
>HPV51\_Alpha\_333087\_nt3101\_Genome\_Tile\_rc|1  
CTTTACCCACTTATCATTATCATATATATATAAAATTTCCAGCTTGTATAGTCCATTGC  
>HPV51\_Alpha\_333087\_nt3121\_Genome\_Tile\_rc|1  
TAGTCCACATTTCCATTTGTCTTTACCCACTTATCATTATCATATATATATAAAATTTTC  
>HPV51\_Alpha\_333087\_nt3141\_Genome\_Tile\_rc|1  
CAGTGTAATATATACCCGTATAGTCCACATTTCCATTTGTCTTTACCCACTTATCATTAT  
>HPV51\_Alpha\_333087\_nt3161\_Genome\_Tile\_rc|1  
ATATTCTTTTTTTGAATTTACAGTGTAATATATACCCGTATAGTCCACATTTCCATTTGT  
>HPV51\_Alpha\_333087\_nt3181\_Genome\_Tile\_rc|1  
TCATCTTTAACTGTACATAATATTCTTTTTTTGAATTTACAGTGTAATATATACCCGTA  
>HPV51\_Alpha\_333087\_nt3601\_Genome\_Tile\_rc|1  
GTTGAGGATACGTTTTTATATAACCCCTTTGTGTTTTGTAAATCTGTATCTAAAACATTTT  
>HPV51\_Alpha\_333087\_nt3721\_Genome\_Tile\_rc|1  
CCCAATGACAGTGTTACACTTGGGGGTACTTTAATGGTTTTTATAAATGTTTCCCGTTGA  
>HPV51\_Alpha\_333087\_nt3741\_Genome\_Tile\_rc|1  
CTAGTTACAGTGTCATAATTCCCAATGACAGTGTTACACTTGGGGGTACTTTAATGGTTT  
>HPV51\_Alpha\_333087\_nt3761\_Genome\_Tile\_rc|1  
TGTACAATACATATATTACACTAGTTACAGTGTCATAATTCCCAATGACAGTGTTACACT  
>HPV51\_Alpha\_333087\_nt4021\_Genome\_Tile\_rc|1  
TGTAAGAGTAAACAAGGTAAGTAAAAAATCAAATATACAAAAATGTAGTTAATTGG  
>HPV51\_Alpha\_333087\_nt4041\_Genome\_Tile\_rc|1  
AAAGTAAAAATGTATATAGATGTAAAGTAAACAAGGTAAGTAAAAAATCAAATATA  
>HPV51\_Alpha\_333087\_nt4081\_Genome\_Tile\_rc|1  
CCACCATATTTAATCACAAAAATATAACAAGTTTATTGCAAAAGTAAAAATGTATATAGA  
>HPV51\_Alpha\_333087\_nt4341\_Genome\_Tile\_rc|1  
CCTTGCAGGAGCAATATCCACCACGCCTGGGCGACCCCCACCACCTAAAGGGATATATCC  
>HPV51\_Alpha\_333087\_nt4401\_Genome\_Tile\_rc|1  
CTCAACCAAAATTTACTATAGAAGGTTTCAGTATGGTGCCATAGGTCAATTATAATAGGTGG  
>HPV51\_Alpha\_333087\_nt4621\_Genome\_Tile\_rc|1  
GTAAATATATATCTGACACTTCTCCAGATTGTGGAGCCTCAATGGATGGAGGTTCAATAT  
>HPV51\_Alpha\_333087\_nt4661\_Genome\_Tile\_rc|1  
GGTATTTCTTCATACCCATGAGTACCAGAGTAGTGTACTAGTAAATATATATCTGACACT  
>HPV51\_Alpha\_333087\_nt4761\_Genome\_Tile\_rc|1  
ACTATACAAGCGGGGAGCAGCTATGCGACTAACCCTGGAGTAGGTGTGCTGCTAATAGG  
>HPV51\_Alpha\_333087\_nt4781\_Genome\_Tile\_rc|1  
TTAACCTGTGTGTAGGACTTACTATACAAGCGGGGAGCAGCTATGCGACTAACCCTGGA  
>HPV51\_Alpha\_333087\_nt4801\_Genome\_Tile\_rc|1  
TAAATCAGGATTTGTAACTTTAACCTGTGTGTAGGACTTACTATACAAGCGGGGAGCAG  
>HPV51\_Alpha\_333087\_nt5241\_Genome\_Tile\_rc|1  
AGATGAAGACATAGATGAAGATAAGGAGGGCAACTGCCTAGACAAAGAGGAGTGTGACAT  
>HPV51\_Alpha\_333087\_nt5261\_Genome\_Tile\_rc|1  
GGAATAGTAACATTTGCATAAGATGAAGACATAGATGAAGATAAGGAGGGCAACTGCCTA  
>HPV51\_Alpha\_333087\_nt5281\_Genome\_Tile\_rc|1  
CAGAATATGTAGTTGAAAATGGAATAGTAACATTTGCATAAGATGAAGACATAGATGAAG  
>HPV51\_Alpha\_333087\_nt5321\_Genome\_Tile\_rc|1

GATGTGGGCAATACCACATCAGGCCCTGTATGAATAGGAACAGAATATGTAGTTGAAAAT  
>HPV51\_Alpha\_333087\_nt5341\_Genome\_Tile\_rc|1  
CATAAGGCCATACTGTAGGAGATGTGGGCAATACCACATCAGGCCCTGTATGAATAGGAA  
>HPV51\_Alpha\_333087\_nt5361\_Genome\_Tile\_rc|1  
GTCAATGGAAGTGTGGGGAACATAAGGCCATACTGTAGGAGATGTGGGCAATACCACATC  
>HPV51\_Alpha\_333087\_nt5381\_Genome\_Tile\_rc|1  
ATAACAATAGAATGCTTGGTGTCAATGGAAGTGTGGGGAACATAAGGCCATACTGTAGGA  
>HPV51\_Alpha\_333087\_nt5421\_Genome\_Tile\_rc|1  
TAAATGTGTATAGGGCCACAAATAGTAATCCCCACCTAGTATAACAATAGAATGCTTGGT  
>HPV51\_Alpha\_333087\_nt7001\_Genome\_Tile\_rc|1  
ACAAGCATACAAAACTAACATACATTACTTTTTAACACGTTTACGTTTGGCTGAAGAGG  
>HPV51\_Alpha\_333087\_nt7021\_Genome\_Tile\_rc|1  
ACAGGCATACAAACAGTGTGCACAAGCATACAAAACTAACATACATTACTTTTTAACACG  
>HPV51\_Alpha\_333087\_nt7301\_Genome\_Tile\_rc|1  
ATGGAAGCTACAAAGTATAACTAAATAGCACAAATATAAACTGTTGTGCTGCAAAAAATG  
>HPV51\_Alpha\_333087\_nt7421\_Genome\_Tile\_rc|1  
ATAAAAAAATGATGGTTTATGCCAAAAACAACGGCAGTTGTGGTTTAAACTTGGCAAA  
>HPV51\_Alpha\_333087\_nt7621\_Genome\_Tile\_rc|1  
TAGTATTTGACCTGCCAACTATGCAATTAGTAAGATAAAATATGCCAAAAAATACATGCC  
>HPV51\_Alpha\_333087\_nt7641\_Genome\_Tile\_rc|1  
GAAACTTGGCACTAAAAACATAGTATTTGACCTGCCAACTATGCAATTAGTAAGATAAAA  
>HPV47\_Beta\_333062\_nt0001\_Genome\_Tile\_rc|1  
ATAATATCCATTGTGAAATGATCTGTACCGCACCTGGTACATTAATGCAAACCTTACCGTT  
>HPV47\_Beta\_333062\_nt0121\_Genome\_Tile\_rc|1  
CCTGAGAAATAAATACACATTTATATATTTATTTATTTATATATTAATATAAAATACTGT  
>HPV47\_Beta\_333062\_nt0161\_Genome\_Tile\_rc|1  
CCTTCTGAGCCATTTGTCTTAATAATTGCAAAGAACTGAGCCTGAGAAATAAATACACAT  
>HPV47\_Beta\_333062\_nt0181\_Genome\_Tile\_rc|1  
AACTGTAGTCTGTTCCAAAGCCTTCTGAGCCATTTGTCTTAATAATTGCAAAGAACTGAG  
>HPV47\_Beta\_333062\_nt0201\_Genome\_Tile\_rc|1  
AGTTCTAGCTTTTCCTCTTTAACTGTAGTCTGTTCCAAAGCCTTCTGAGCCATTTGTCTT  
>HPV47\_Beta\_333062\_nt0221\_Genome\_Tile\_rc|1  
AGCCTCTAATAGTAGTAGGTAGTTCTAGCTTTTCCTCTTTAACTGTAGTCTGTTCCAAAG  
>HPV47\_Beta\_333062\_nt0241\_Genome\_Tile\_rc|1  
TATGTCTAACAATTGAGCTAAGCCTCTAATAGTAGTAGGTAGTTCTAGCTTTTCCTCTTT  
>HPV47\_Beta\_333062\_nt0281\_Genome\_Tile\_rc|1  
TGCCACAAAAGTTGCAAGGTAGCAAACAATCTACTAAAGGTATGTCTAACAATTGAGCTA  
>HPV47\_Beta\_333062\_nt0501\_Genome\_Tile\_rc|1  
GACAGGCAGGTATGACACCTTATGTCAATCTCAAAAATGGAAAGGCCTGTAGCTAGCTCA  
>HPV47\_Beta\_333062\_nt0521\_Genome\_Tile\_rc|1  
TTTCAATAATGTCAAGAAATGACAGGCAGGTATGACACCTTATGTCAATCTCAAAAATGG  
>HPV47\_Beta\_333062\_nt0861\_Genome\_Tile\_rc|1  
CAGTCAAAAGTTCCCTGAAATGTCCTGATGCCACGGTTTGTGCGTTCACAAAAATGCGAA  
>HPV47\_Beta\_333062\_nt0881\_Genome\_Tile\_rc|1  
GCAGAGGAGCTGCAGATCACCAGTCAAAAGTTCCTGAAATGTCCTGATGCCACGGTTTGT  
>HPV47\_Beta\_333062\_nt1801\_Genome\_Tile\_rc|1  
TTAATTGTGCAATCCATTGAGGTAAGGACCGTGGGTGAACACTCCAGGTCCCATACATC  
>HPV47\_Beta\_333062\_nt1821\_Genome\_Tile\_rc|1  
ACTCTTATGGCCCCAAAATGGTTAATTGTGCAATCCATTGAGGTAAGGACCGTGGGTGAA  
>HPV47\_Beta\_333062\_nt2101\_Genome\_Tile\_rc|1  
CAATGCTAGACCACTGTCCTTCTCCCTCTACTTCATGTATCCTTGTATATATCCACTCAG  
>HPV47\_Beta\_333062\_nt2281\_Genome\_Tile\_rc|1  
TTACAAATGATAATACTCTCCCCCTTAGAACTTTTATTAAGGACATTCCAAACGATGACT  
>HPV47\_Beta\_333062\_nt2501\_Genome\_Tile\_rc|1  
TAATTGGTCTCTGCATGTACATTAATATTAGATGTAAGTATTAAAGGTGGAAACTTTGTT

>HPV47\_Beta\_333062\_nt2541\_Genome\_Tile\_rc|1  
TTTAAATTCAAACCCTTAATTCTACTATGTAGGTATCTATAATTGGTCTCTGCATGTAC  
>HPV47\_Beta\_333062\_nt2861\_Genome\_Tile\_rc|1  
CAGATATTGCTAATGCAGGCACTGGTTGGTATCCCAACCTATTTATGCCTTTCTGCCTAG  
>HPV47\_Beta\_333062\_nt2901\_Genome\_Tile\_rc|1  
AACTGCAACACCATATATATAGCCTCTTTGGCCCTTGCCCTCAGATATTGCTAATGCAGGC  
>HPV47\_Beta\_333062\_nt2941\_Genome\_Tile\_rc|1  
CCAAGGCTCCAAAGCAAACGCTGATTTTTGTAGCGACTCTAACTGCAACACCATATATAT  
>HPV47\_Beta\_333062\_nt3161\_Genome\_Tile\_rc|1  
TAAATGTTCCATATAGGTAGTAAATGCCAGTTTGATTGACCCCACTTGTTGTCTTATGCC  
>HPV47\_Beta\_333062\_nt3181\_Genome\_Tile\_rc|1  
AAATAACACATAATAGTGTTTAAATGTTCCATATAGGTAGTAAATGCCAGTTTGATTGAC  
>HPV47\_Beta\_333062\_nt3621\_Genome\_Tile\_rc|1  
CTACTGGTGGTGCCTGGTAGATCTGGAGGTGGACCTTGACCTGGAACGAGCACGAGTCTTG  
>HPV47\_Beta\_333062\_nt3681\_Genome\_Tile\_rc|1  
GAGGTGTAGGTGGAGGGTGATCGCGATCTTTGCCTTGTTGGATGACCTCTACCTCCCCTT  
>HPV47\_Beta\_333062\_nt4161\_Genome\_Tile\_rc|1  
GACCACTCGACTCCTTTTGGATATTTGACAGCATCATCAAATCCCTTCTCTGAGTGAGG  
>HPV47\_Beta\_333062\_nt4181\_Genome\_Tile\_rc|1  
GGCTATCAAGACTACCATATGACCACTCGACTCCTTTTGGATATTTGACAGCATCATCAA  
>HPV47\_Beta\_333062\_nt4201\_Genome\_Tile\_rc|1  
CAGCGTTAATGCTTGTTAAAGGCTATCAAGACTACCATATGACCACTCGACTCCTTTTGG  
>HPV47\_Beta\_333062\_nt4261\_Genome\_Tile\_rc|1  
CAGTAAAAATAAAAAACGTAAAAAAAAGCTGTGGTTGTTAATAGCAGTTAGTAGCAAAG  
>HPV47\_Beta\_333062\_nt4621\_Genome\_Tile\_rc|1  
GATGAAGCAGTAGGCTCGACAGGTGCGATTGTGTCAATGGGTAAAAATATCAACTGGTCCA  
>HPV47\_Beta\_333062\_nt4641\_Genome\_Tile\_rc|1  
ACTCTGTTAATGGGACTAAAGATGAAGCAGTAGGCTCGACAGGTGCGATTGTGTCAATGG  
>HPV47\_Beta\_333062\_nt4661\_Genome\_Tile\_rc|1  
AAGTAAATCAGCACCAGACGACTCTGTTAATGGGACTAAAGATGAAGCAGTAGGCTCGAC  
>HPV47\_Beta\_333062\_nt4741\_Genome\_Tile\_rc|1  
GTTGTGGTGACTACAGGGGAGTCGATTGTGCGACCTTCAGGAATAGGATGTATTTCCGGCT  
>HPV47\_Beta\_333062\_nt4881\_Genome\_Tile\_rc|1  
CAAGAGAACTCTCGCCCTGCGCAGGTGTTGATTTCAGTGAGTATCTGAAAAGAGGGATTAT  
>HPV47\_Beta\_333062\_nt4901\_Genome\_Tile\_rc|1  
GGTGACCAAAAATATGGTCAGCAAGAGAACTCTCGCCCTGCGCAGGTGTTGATTTCAGTGAG  
>HPV47\_Beta\_333062\_nt4941\_Genome\_Tile\_rc|1  
CTGTTATATCACCGCCTATCCTTTGTCCACCAGACCCTGAGGTGACCAAAAATATGGTCAG  
>HPV47\_Beta\_333062\_nt4961\_Genome\_Tile\_rc|1  
CTCAGTAAGTTCAATTTTCGTCTGTTATATCACCGCCTATCCTTTGTCCACCAGACCCTGA  
>HPV47\_Beta\_333062\_nt4981\_Genome\_Tile\_rc|1  
AATGTATATCTGCTTGGAACCTCAGTAAGTTCAATTTTCGTCTGTTATATCACCGCCTATC  
>HPV47\_Beta\_333062\_nt5081\_Genome\_Tile\_rc|1  
TCTTCTATTTGTTAATGAGAAGCCCCGTCGCCCTTACTGCAGAGGCTACAGTTTGTAATGG  
>HPV47\_Beta\_333062\_nt5301\_Genome\_Tile\_rc|1  
TTACCCTAATATAACCTGCTGGTGTGTAGAAATATTGAGGACGGCCCAATTGTTTAATAT  
>HPV47\_Beta\_333062\_nt5421\_Genome\_Tile\_rc|1  
AAAGCTGTAGTTCTATTGGATCCTCAGTATTTATAGAACTTAAATCTCTATAAAAGTGTA  
>HPV47\_Beta\_333062\_nt5561\_Genome\_Tile\_rc|1  
CTCCACAGTCTCATCCAAAAGTAAATCATTAGATGAAGCATCTATTGTTTCAGATAAAGG  
>HPV47\_Beta\_333062\_nt5661\_Genome\_Tile\_rc|1  
GAACATAATAGGAACCTACTTCTAGTAGTCTCAAATCTGGGAACAGTATATGATGTTGTAC  
>HPV47\_Beta\_333062\_nt5681\_Genome\_Tile\_rc|1  
ATAATAACCATCTGTGTCTTGAACATAATAGGAACCTACTTCTAGTAGTCTCAAATCTGGG  
>HPV47\_Beta\_333062\_nt5701\_Genome\_Tile\_rc|1

CGTGACTCTGGGTAAGCAACATAATAACCATCTGTGTCTTGAACATAATAGGAACTACTT  
>HPV47\_Beta\_333062\_nt5721\_Genome\_Tile\_rc|1  
AAATAATATCAATAGTGTCCCGTGACTCTGGGTAAGCAACATAATAACCATCTGTGTCTT  
>HPV47\_Beta\_333062\_nt5741\_Genome\_Tile\_rc|1  
AGGTAATTCAGGTGTAGGGTAAATAATATCAATAGTGTCCCGTGACTCTGGGTAAGCAAC  
>HPV47\_Beta\_333062\_nt5761\_Genome\_Tile\_rc|1  
TGGGTGTGAATGACAACACTACAGGTAATTCAGGTGTAGGGTAAATAATATCAATAGTGTCC  
>HPV47\_Beta\_333062\_nt6941\_Genome\_Tile\_rc|1  
TATATCCTTTATGTCCCCTGCCTGAGAGTAAACAGAGATGCTGAAATTTGTATTTCTTGT  
>HPV47\_Beta\_333062\_nt6961\_Genome\_Tile\_rc|1  
TTGTCTGCATTATAATCCTGTATATCCTTTATGTCCCCTGCCTGAGAGTAAACAGAGATG  
>HPV47\_Beta\_333062\_nt6981\_Genome\_Tile\_rc|1  
GTCTTTGATACTCTCTAAATTTGTCTGCATTATAATCCTGTATATCCTTTATGTCCCCTG  
>HPV47\_Beta\_333062\_nt7161\_Genome\_Tile\_rc|1  
TGGCCAAAGATTCTAGATATCTATATGTATCCTGAATAGGGTTGTCTGGAGTAGGCACAA  
>HPV47\_Beta\_333062\_nt7181\_Genome\_Tile\_rc|1  
AGACTTTTCAGGACACCTAGTGGCCAAAGATTCTAGATATCTATATGTATCCTGAATAGG  
>HPV47\_Beta\_333062\_nt7221\_Genome\_Tile\_rc|1  
AGTTTAAACCTTTGTAGGGGTCAACCTTCTCTTTTGGAGGAGACTTTTCAGGACACCTAG  
>HPV47\_Beta\_333062\_nt7621\_Genome\_Tile\_rc|1  
TGATCGCCAAAAACGATAACAAGATTAAATTTCTTTTGGCAGAAGACCTAATCCGAGCGT  
>HPV67\_Alpha\_3228267\_nt0061\_Genome\_Tile\_rc|1  
CGTCTGTGTCTGAAACATATTTCTTGCCTGTAGGTGGACACTGGTGTGCTTTATATAT  
>HPV67\_Alpha\_3228267\_nt0261\_Genome\_Tile\_rc|1  
AACTTTTGATAACAGTCTTAGGCATTGCTTACATACCCCATACGGATTCCCACATCTGTA  
>HPV67\_Alpha\_3228267\_nt0281\_Genome\_Tile\_rc|1  
TTAAAATATCTATATTCATAACTTTTGATAACAGTCTTAGGCATTGCTTACATACCCCA  
>HPV67\_Alpha\_3228267\_nt0341\_Genome\_Tile\_rc|1  
GTAATTTTCATTTAATGGTTTATGCACAATTTCTTCTAAAGTATTTCCATATACTGAATAG  
>HPV67\_Alpha\_3228267\_nt0361\_Genome\_Tile\_rc|1  
GACATGTTATACATCGTATTGTAATTTCAATTAATGGTTTATGCACAATTTCTTCTAAAG  
>HPV67\_Alpha\_3228267\_nt0501\_Genome\_Tile\_rc|1  
CTTCAAATATTATACCTGGGTCTGCGTTCGTTGAGGTCTCCAACACACTGAACACCGTCC  
>HPV67\_Alpha\_3228267\_nt0521\_Genome\_Tile\_rc|1  
AGCTTTGTCTCCACGCATGGCTTCAAATATTATACCTGGGTCTGCGTTCGTTGAGGTCTC  
>HPV67\_Alpha\_3228267\_nt0701\_Genome\_Tile\_rc|1  
AGTGCCTCACAGATGTTACACACAGTAACAATATGGTAATTGGTTGTATCTGGTTTTGC  
>HPV67\_Alpha\_3228267\_nt0721\_Genome\_Tile\_rc|1  
CTGTGAATGCACAAACGCAAAGTGCACTCACAGATGTTACACACAGTAACAATATGGTAA  
>HPV67\_Alpha\_3228267\_nt0781\_Genome\_Tile\_rc|1  
CACACTATTCCTAGTGTGTTTATAAGCATCTGCTGGATTGTTCCGACGTCTGCTGCTGTA  
>HPV67\_Alpha\_3228267\_nt0981\_Genome\_Tile\_rc|1  
TATGTGTATCATCTATAAAGCCAATTAAATCACTACCAGTGTGAGATGCATCCTCATCCT  
>HPV67\_Alpha\_3228267\_nt1141\_Genome\_Tile\_rc|1  
GCTGTACATGCTTGGTTTTCTATACCATTACTATTACCACCACATGCCTGTATGCCTGTA  
>HPV67\_Alpha\_3228267\_nt1161\_Genome\_Tile\_rc|1  
CGTATGCTCTGCGTTTTGCGGCTGTACATGCTTGGTTTTCTATACCATTACTATTACCAC  
>HPV67\_Alpha\_3228267\_nt1181\_Genome\_Tile\_rc|1  
ATATCCGCTGTCTTCTATGTCGTATGCTCTGCGTTTTGCGGCTGTACATGCTTGGTTTTTC  
>HPV67\_Alpha\_3228267\_nt1321\_Genome\_Tile\_rc|1  
CTACTATTACTTTCCGATTGCATATCTACACTGTTTCCCGTACTACTTGCCCCCGTACTA  
>HPV67\_Alpha\_3228267\_nt1361\_Genome\_Tile\_rc|1  
AATATTTTCCACAGTTTGCAATGGCATGCTTTGTTCCCTGACTACTATTACTTTCCGATTG  
>HPV67\_Alpha\_3228267\_nt1381\_Genome\_Tile\_rc|1  
TTTATATTATTACATGCATAATATTTTCCACAGTTTGCAATGGCATGCTTTGTTCCCTGA



>HPV67\_Alpha\_3228267\_nt1401\_Genome\_Tile\_rc|1  
ATTTATGCATTAACGTTGCCTTTATATTATTTACATGCATAATATTTCCACAGTTTGCA  
>HPV67\_Alpha\_3228267\_nt1441\_Genome\_Tile\_rc|1  
CTTATTAGCTGTGTAAACGTTACCCCATATGCTTCCTTAAATTTATGCATTAACGTTGCC  
>HPV67\_Alpha\_3228267\_nt1461\_Genome\_Tile\_rc|1  
TCCTGTCACTTTTAAATGGTCTTATTAGCTGTGTAAACGTTACCCCATATGCTTCCTTAA  
>HPV67\_Alpha\_3228267\_nt1561\_Genome\_Tile\_rc|1  
AAATGTGTGTACAACGTTTGTGGCTTGATTAACACCTTTAACTTTCTGCTACTGATGGT  
>HPV67\_Alpha\_3228267\_nt2481\_Genome\_Tile\_rc|1  
CTACATCTATGTTGGAAGTTAATAGTAATGGTGGACATTTTAGCTGTACTAACGCTTTAT  
>HPV67\_Alpha\_3228267\_nt2501\_Genome\_Tile\_rc|1  
CGGCCATCTTGAATCTGTTGCTACATCTATGTTGGAAGTTAATAGTAATGGTGGACATTT  
>HPV67\_Alpha\_3228267\_nt2521\_Genome\_Tile\_rc|1  
ACTACTCTACTATGTAAAAACGGCCATCTTGAATCTGTTGCTACATCTATGTTGGAAGTT  
>HPV67\_Alpha\_3228267\_nt2541\_Genome\_Tile\_rc|1  
GATTGTAAATCTAAACACTACTACTCTACTATGTAAAAACGGCCATCTTGAATCTGTTG  
>HPV67\_Alpha\_3228267\_nt2781\_Genome\_Tile\_rc|1  
ACATTCAATGCGTCTCAGTCTCCAATGTTCAATTTGTGTACATAAGTCTTTTTTATTAGC  
>HPV67\_Alpha\_3228267\_nt2821\_Genome\_Tile\_rc|1  
TCCGTGCCAGTCCCAGTTCCTTTAGCTTTATAATACAAAGCACATTCAATGCGTCTCAGTC  
>HPV67\_Alpha\_3228267\_nt2981\_Genome\_Tile\_rc|1  
TTTGGTTACATAACCATAGTTCTAGGCTGGTACTTTGCAATGTCCATTCATCATTACTA  
>HPV67\_Alpha\_3228267\_nt3001\_Genome\_Tile\_rc|1  
CTTTTTTTTTTTAAACATTTTTTTTGGTTTACATAACCATAGTTCTAGGCTGGTACTTTGCA  
>HPV67\_Alpha\_3228267\_nt3041\_Genome\_Tile\_rc|1  
TTTTCTTTATCATTATCGTATTGCACTGTTACAGTCTCTCCTTTTTTTTTTTAAACATTTT  
>HPV67\_Alpha\_3228267\_nt3081\_Genome\_Tile\_rc|1  
TACTATATATATTTTCATTCCAACCTGTATATTTCCATTGTATTTTCTTTATCATTATCGTA  
>HPV67\_Alpha\_3228267\_nt3121\_Genome\_Tile\_rc|1  
AGTCCACCTTTCCCCTACTACTGTCCACACAGAGTCCTTTACTATATATATTTTCATTCC  
>HPV67\_Alpha\_3228267\_nt3141\_Genome\_Tile\_rc|1  
TATATAATATAGTCCCATATAGTCCACCTTTCCCCTACTACTGTCCACACAGAGTCCTT  
>HPV67\_Alpha\_3228267\_nt3201\_Genome\_Tile\_rc|1  
TTTTGAATACTTTTTTAGCATCGGTTTCAAACCTTTACATAATACGTTTTTTCTGTTTCATA  
>HPV67\_Alpha\_3228267\_nt3321\_Genome\_Tile\_rc|1  
ATACGTTTCTGTGGCGTGTGGTATCCGGGCAGCAACCTCAGTAGTGGATATTTTCGTTACT  
>HPV67\_Alpha\_3228267\_nt3441\_Genome\_Tile\_rc|1  
CCGTTGTCTGCACAATAGCTTTGTGGGGTGCTGGGAGTTGTTGCAGAAAGTCTGGGACGTC  
>HPV67\_Alpha\_3228267\_nt3461\_Genome\_Tile\_rc|1  
ACCGATGTACAGTCCACGACCGTTGTCTGCACAATAGCTTTGTGGGGTGCTGGGAGTTG  
>HPV67\_Alpha\_3228267\_nt3801\_Genome\_Tile\_rc|1  
TGGCTTGTGTGTAATGTAGTAATATACAATATATTACAATGACATTATACCACAAACAAT  
>HPV67\_Alpha\_3228267\_nt3861\_Genome\_Tile\_rc|1  
AAATACAAAAATGGCCAGCATTGTATAGTATACCTATATATACAACCTAGCAGCACATAT  
>HPV67\_Alpha\_3228267\_nt3881\_Genome\_Tile\_rc|1  
CACAAACAGCAACACAAATGCAAATACAAAAATGGCCAGCATTGTATAGTATACCTATATA  
>HPV67\_Alpha\_3228267\_nt4021\_Genome\_Tile\_rc|1  
TAGGTAGGTACAAAAATATAAGATATGCCAAAAATACCCGTAAGGGGGAACCTATAAAAC  
>HPV67\_Alpha\_3228267\_nt4041\_Genome\_Tile\_rc|1  
ATGTAAATGAATACACATCATAGGTAGGTACAAAAATATAAGATATGCCAAAAATACCCG  
>HPV67\_Alpha\_3228267\_nt4061\_Genome\_Tile\_rc|1  
TAGGAAACAATATACTGTGCATGTAAATGAATACACATCATAGGTAGGTACAAAAATATA  
>HPV67\_Alpha\_3228267\_nt4081\_Genome\_Tile\_rc|1  
ACATACAGTATACAAAGTATTAGGAAACAATATACTGTGCATGTAAATGAATACACATCA  
>HPV67\_Alpha\_3228267\_nt4141\_Genome\_Tile\_rc|1

TAAATATAAAAAGTATGCCATTGTACCACACTGTGCACAAAACAATAAATATGTACAAAT  
>HPV67\_Alpha\_3228267\_nt4181\_Genome\_Tile\_rc|1  
CATTGTACACACTAGTAAAAATAAAAAAATGGTTTATTAGTAAATATAAAAAGTATGCCA  
>HPV67\_Alpha\_3228267\_nt4421\_Genome\_Tile\_rc|1  
TGCAGTGGGAGGCCGTGTAGATAAGGGGACATAACCTGTTCTACCACCCGTACCAGACCC  
>HPV67\_Alpha\_3228267\_nt4441\_Genome\_Tile\_rc|1  
ATTGTAGATGTAGGCGCAGATGCAGTGGGAGGCCGTGTAGATAAGGGGACATAACCTGTT  
>HPV67\_Alpha\_3228267\_nt4481\_Genome\_Tile\_rc|1  
GTCTAGGGGGCCCTACAGTATCAACAGATACAGGGGGTCGTATTGTAGATGTAGGCGCAGA  
>HPV67\_Alpha\_3228267\_nt4701\_Genome\_Tile\_rc|1  
AAGATGAAAAATGGGCGGAGTACTGAAGGTTCTGTAAAAGTGGGATTTAAATGGGTGGTAA  
>HPV67\_Alpha\_3228267\_nt4721\_Genome\_Tile\_rc|1  
TAAATGACCAGAGGCTTCAGAAGATGAAAAATGGGCGGAGTACTGAAGGTTCTGTAAAAGT  
>HPV67\_Alpha\_3228267\_nt4741\_Genome\_Tile\_rc|1  
ATAGTGGGTGTAGAAAATATTAAATGACCAGAGGCTTCAGAAGATGAAAAATGGGCGGAGT  
>HPV67\_Alpha\_3228267\_nt4841\_Genome\_Tile\_rc|1  
GGGCGCAGGCCCTAGGAATAGGGGTGCTACTAGTTACATTGTCAGTAGTAGAAACAAT  
>HPV67\_Alpha\_3228267\_nt4981\_Genome\_Tile\_rc|1  
AAGTAAAGTGTTTCATCAGGTTCTGTAGGTTGAAATGCAGGATTATCAAATGTAATTAAT  
>HPV67\_Alpha\_3228267\_nt5021\_Genome\_Tile\_rc|1  
AAAGTCAGGGTCAGGTGCAGGTGAAATGTCTTGGTGTTGAAAGTAAAGTGTTTCATCAGG  
>HPV67\_Alpha\_3228267\_nt5201\_Genome\_Tile\_rc|1  
TGGCTGTAGTTCTATGGAGTCAGCAGGTACTATAGGACTTAAATCCTGATAATAATGCAC  
>HPV67\_Alpha\_3228267\_nt5221\_Genome\_Tile\_rc|1  
GAAGACACAGGGCGAGATAATGGCTGTAGTTCTATGGAGTCAGCAGGTACTATAGGACTT  
>HPV67\_Alpha\_3228267\_nt5241\_Genome\_Tile\_rc|1  
CATTAATAGAATGGGAAGCAGAAGACACAGGGCGAGATAATGGCTGTAGTTCTATGGAGT  
>HPV67\_Alpha\_3228267\_nt5301\_Genome\_Tile\_rc|1  
AGGATATTGATGGCTGTGGAAAGGGTGTGTCAGGATCCATATATACATCATATAAACCAT  
>HPV67\_Alpha\_3228267\_nt5321\_Genome\_Tile\_rc|1  
CTGAGGACTATGTAATGAATAGGATATTGATGGCTGTGGAAAGGGTGTGTCAGGATCCAT  
>HPV67\_Alpha\_3228267\_nt5341\_Genome\_Tile\_rc|1  
GGGACAGTAACATTGGTGGTCTGAGGACTATGTAATGAATAGGATATTGATGGCTGTGGA  
>HPV67\_Alpha\_3228267\_nt5361\_Genome\_Tile\_rc|1  
AATCAAAACCACTACTTAAGGGGACAGTAACATTGGTGGTCTGAGGACTATGTAATGAAT  
>HPV67\_Alpha\_3228267\_nt5381\_Genome\_Tile\_rc|1  
TACAGTAGAGGAAAATGGAATAACAAACCCTACTTAAGGGGACAGTAACATTGGTGGT  
>HPV67\_Alpha\_3228267\_nt5421\_Genome\_Tile\_rc|1  
GGGCTACAGGGGACACAATATCGGGACCTGGCTGTAATGGTACAGTAGAGGAAAATGGAA  
>HPV67\_Alpha\_3228267\_nt5481\_Genome\_Tile\_rc|1  
AAACAAGTACATTGTTAAAGGGAGATGTAGGTATAACAGGTACAAAAGGAGTGTATGTAG  
>HPV67\_Alpha\_3228267\_nt5501\_Genome\_Tile\_rc|1  
TAAATAAAAATCACTACCATAAACAAGTACATTGTTAAAGGGAGATGTAGGTATAACAGG  
>HPV67\_Alpha\_3228267\_nt5741\_Genome\_Tile\_rc|1  
AACACCTTTTGTAGTGTGGAGGGATTAGGAATGGAAAAGTAAGGATGGCCTACAGCTAAA  
>HPV67\_Alpha\_3228267\_nt5981\_Genome\_Tile\_rc|1  
GTACCAGGCTGGCTAGGGTATTTATTATTGTTTCAGTATCATCAAACCTATTAAAGTAAT  
>HPV67\_Alpha\_3228267\_nt6001\_Genome\_Tile\_rc|1  
ACAAGCATTCCTATTATCAGTACCAGGCTGGCTAGGGTATTTATTATTGTTTCAGTAT  
>HPV67\_Alpha\_3228267\_nt6121\_Genome\_Tile\_rc|1  
AAGGGGGACAGGCACCTGGCCCATTACTGTTACCACTACACGGGGTACCTTTACCCAGT  
>HPV67\_Alpha\_3228267\_nt6381\_Genome\_Tile\_rc|1  
ATCTGTAGGTACATCCTCCCCTAATTTACCTGCTCTGTTAAACAAATGCCTAACAAACAT  
>HPV67\_Alpha\_3228267\_nt6401\_Genome\_Tile\_rc|1  
GCAGATCCCTTAAAATACAAATCTGTAGGTACATCCTCCCCTAATTTACCTGCTCTGTTA

>HPV67\_Alpha\_3228267\_nt6441\_Genome\_Tile\_rc|1  
AGTAGGAAAAAAGCTGAGGTTTGCAGTGCAGAAAGTGTTCAGATCCCTTAAAATACAA  
>HPV67\_Alpha\_3228267\_nt6621\_Genome\_Tile\_rc|1  
GTATGTAGCCTCTGATTTTTCTCAGAACATAAAGTCATGTTGGTACTACGTGTAGTGTC  
>HPV67\_Alpha\_3228267\_nt6741\_Genome\_Tile\_rc|1  
ATTCATGGTGTGTATGTATTGCATAACATTTGCAGTAAGGGATATTTTGCACAGCTGAAA  
>HPV67\_Alpha\_3228267\_nt7021\_Genome\_Tile\_rc|1  
AGGAAGAAGAAGGTGAAGAACGTTTTAGTTTAGGTTTAGCTGTAAACCTGCCTGCAATA  
>HPV67\_Alpha\_3228267\_nt7101\_Genome\_Tile\_rc|1  
AATCATACATACAAACAATACAAACACACAACAGTCATACAATTACCTTTTAACCTTTTT  
>HPV67\_Alpha\_3228267\_nt7121\_Genome\_Tile\_rc|1  
ACACATTACACAAACATACAAATCATACATACAAACAATACAAACACACAACAGTCATAC  
>HPV67\_Alpha\_3228267\_nt7161\_Genome\_Tile\_rc|1  
GGAAATTGACAGACACAGGGAACATGCATACACATAACATACACATTACACAAACATACA  
>HPV67\_Alpha\_3228267\_nt7281\_Genome\_Tile\_rc|1  
CAGGGATAGGCAAGGCATGGCATGGGCAGGGATATAGGGACAGTACCTTACTCATTGGG  
>HPV67\_Alpha\_3228267\_nt7301\_Genome\_Tile\_rc|1  
GTATGCTACATATAATTATACAGGGATAGGCAAGGGCATGGCATGGGCAGGGATATAGGG  
>HPV67\_Alpha\_3228267\_nt7321\_Genome\_Tile\_rc|1  
TAATAAATATACCAAACACAGTATGCTACATATAATTATACAGGGATAGGCAAGGGCATG  
>HPV67\_Alpha\_3228267\_nt7341\_Genome\_Tile\_rc|1  
TGTAATGTTATAAGTAAAAGTAATAAATATACCAAACACAGTATGCTACATATAATTATA  
>HPV67\_Alpha\_3228267\_nt7361\_Genome\_Tile\_rc|1  
TAGTAACCCAAAATGGAGACTGTAATGTTATAAGTAAAAGTAATAAATATACCAAACACA  
>HPV67\_Alpha\_3228267\_nt7381\_Genome\_Tile\_rc|1  
GTTACAGATATAAAATGGAGTAGTAACCCAAAATGGAGACTGTAATGTTATAAGTAAAAG  
>HPV67\_Alpha\_3228267\_nt7481\_Genome\_Tile\_rc|1  
AACAGCAAGTAAAGGCATTGCACTGCAGGAAGACAAAGATTAACAATGTTGGCAAGAAAC  
>HPV67\_Alpha\_3228267\_nt7501\_Genome\_Tile\_rc|1  
GTCAATTTAGGCGGGAGAGCAACAGCAAGTAAAGGCATTGCACTGCAGGAAGACAAAGAT  
>HPV67\_Alpha\_3228267\_nt7541\_Genome\_Tile\_rc|1  
TAAACATGTAAAAGGGCGTGTGCACTGCAATACCATGAGTCAATTTAGGCGGGAGAGC  
>HPV67\_Alpha\_3228267\_nt7621\_Genome\_Tile\_rc|1  
CCCAATAAAATAGTGCTGTGCAAGCCAAAAGTGAATTAAGCAATAAAAACATGGTAAAA  
>HPV67\_Alpha\_3228267\_nt7641\_Genome\_Tile\_rc|1  
GCTTACAATAGTAACATAAACCCAATAAAATAGTGCTGTGCAAGCCAAAAGTGAATTAA  
>HPV67\_Alpha\_3228267\_nt7681\_Genome\_Tile\_rc|1  
TGTGAGTAAGGGTTTGAATCATTTTTACAAGGTGTATGTTGGCTTACAATAGTAACATAAA  
>HPV67\_Alpha\_3228267\_nt7721\_Genome\_Tile\_rc|1  
GGTTGGAACATGTTAACCCAAACCGGTGCATACACACCTGTGTGAGTAAGGGTTTGAATC  
>HPV70\_Alpha\_1173493\_nt0061\_Genome\_Tile\_rc|1  
GGAAATCGCGCCATTCCGTATGGGCAAGCAACTTTTGCATGGTTTTATATACACCGTTTT  
>HPV70\_Alpha\_1173493\_nt1201\_Genome\_Tile\_rc|1  
TACCCTTTGTTCCCTATGTACGCCTGGCGGTTTTGCACAAGGACTTTTATTTAGATTGCT  
>HPV70\_Alpha\_1173493\_nt1221\_Genome\_Tile\_rc|1  
ACCGGGAGCTCTTGTAGTGTTACCTTTGTTCCCTATGTACGCCTGGCGGTTTTGCACAA  
>HPV70\_Alpha\_1173493\_nt1241\_Genome\_Tile\_rc|1  
CCTGTTTATTGCATATGTTTACCGGGAGCTCTTGTAGTGTTACCTTTGTTCCCTATGTA  
>HPV70\_Alpha\_1173493\_nt1281\_Genome\_Tile\_rc|1  
CCATAGCCGCTGTCTGGTACTGAATACAGTTTGTTCTTGCCTGTTTATTGCATATGTTT  
>HPV70\_Alpha\_1173493\_nt1461\_Genome\_Tile\_rc|1  
GTTTTTAGCTGTGCAGTAGGTGACTGTGGATCTTGATTCTCACTATCAATAGCACTGTCT  
>HPV70\_Alpha\_1173493\_nt1481\_Genome\_Tile\_rc|1  
GGTTATTAGCCTGTAATACTGTTTTTAGCTGTGCAGTAGGTGACTGTGGATCTTGATTCT  
>HPV70\_Alpha\_1173493\_nt1501\_Genome\_Tile\_rc|1

TGATAGTAGTATGGCTTTTTGGTTATTAGCCTGTAATACTGTTTTAGCTGTGCAGTAGG  
>HPV70\_Alpha\_1173493\_nt1521\_Genome\_Tile\_rc|1  
CCATATGTGTGTTTAAATTGTGATAGTAGTATGGCTTTTTGGTTATTAGCCTGTAATACT  
>HPV70\_Alpha\_1173493\_nt1541\_Genome\_Tile\_rc|1  
CCAGGTCGTTAAATGCTAATCCATATGTGTGTTTAAATTGTGATAGTAGTATGGCTTTTT  
>HPV70\_Alpha\_1173493\_nt1701\_Genome\_Tile\_rc|1  
AGTATATACACTCCATATTTGGTATCCAAACACTGTATATGTGTATATAACGCATATGGC  
>HPV70\_Alpha\_1173493\_nt1721\_Genome\_Tile\_rc|1  
ATTTATATCTAATTAATAGTAGTATATACACTCCATATTTGGTATCCAAACACTGTATAT  
>HPV70\_Alpha\_1173493\_nt1781\_Genome\_Tile\_rc|1  
TTTCTGGCACATGTAATAATTTACTTAATCCTTTGCCTACTGTTATCCTGTTTTTCCAC  
>HPV70\_Alpha\_1173493\_nt2221\_Genome\_Tile\_rc|1  
TTGATACCTTAGAAATTGCACTATTGGTCGCCAGTCGCCCCCATCGTCACATTTATCACA  
>HPV70\_Alpha\_1173493\_nt3161\_Genome\_Tile\_rc|1  
ATAATGCATAGAATTGTCCTTGTTCATCGTACCACACCTCCACTGTAACACCTTTTTT  
>HPV70\_Alpha\_1173493\_nt3301\_Genome\_Tile\_rc|1  
ATTTGTGCATCCTGCCTAAACACTTCATAATATGTCTTATGCTGCTCGTGCACATAATAT  
>HPV70\_Alpha\_1173493\_nt3441\_Genome\_Tile\_rc|1  
TATGGGCCGGGGTGGTGTGTGTAGTTCTGCAGTAAGCTCAGTAGTGGGTACTGTGTCGT  
>HPV70\_Alpha\_1173493\_nt3521\_Genome\_Tile\_rc|1  
TGTTTCTGAGGGTCTGGGAGACTCCACACTTGCAAGACGGCGCGACTTAGTTTTTTTTGGT  
>HPV70\_Alpha\_1173493\_nt3541\_Genome\_Tile\_rc|1  
AGGTCCACGAACACTCCGTCTGTTTCTGAGGGTCTGGGAGACTCCACACTTGCAAGACGGC  
>HPV70\_Alpha\_1173493\_nt3581\_Genome\_Tile\_rc|1  
ACACTGGTGCCGTCGTTTGTGTCAGCCTTTACTTGTAACAAGGTCCACGAACACTCCGTC  
>HPV70\_Alpha\_1173493\_nt3681\_Genome\_Tile\_rc|1  
TATTTTCATACAATGAATTAAATTTTCGCAATCGATACCTAAGACACTTTAAACCATTTT  
>HPV70\_Alpha\_1173493\_nt3761\_Genome\_Tile\_rc|1  
TGCTTCAGTAGTATATGTTACAGTTAGTATACCTGTATGTTTACTTCCCTTGCCCCCTAT  
>HPV70\_Alpha\_1173493\_nt3841\_Genome\_Tile\_rc|1  
TGCTGTTACAATGTCATATATCCCACAGATACATGTACACTAGGTGGAATTCTAACAGTT  
>HPV70\_Alpha\_1173493\_nt3861\_Genome\_Tile\_rc|1  
TACAATATACATACAGCATGTGCTGTTACAATGTCATATATCCCACAGATACATGTACAC  
>HPV70\_Alpha\_1173493\_nt4021\_Genome\_Tile\_rc|1  
AAAACATTTGCAATGGTGTGGTATGTACAACAATAAACACAAATAAAAGTAGCCACATAT  
>HPV70\_Alpha\_1173493\_nt4081\_Genome\_Tile\_rc|1  
CATATACTGAAAGGATGTGTAAAAACCACATAGGCAATATAAAAAATAGTAAATATATAC  
>HPV70\_Alpha\_1173493\_nt4101\_Genome\_Tile\_rc|1  
ATGCAGCAACACAACCTTAAGCATATACTGAAAGGATGTGTAAAAACCACATAGGCAATAT  
>HPV70\_Alpha\_1173493\_nt4121\_Genome\_Tile\_rc|1  
CAAGTAATGTACAATACACTATGCAGCAACACAACCTTAAGCATATACTGAAAGGATGTGT  
>HPV70\_Alpha\_1173493\_nt4521\_Genome\_Tile\_rc|1  
GCCTGTAAAAGTAGGGATGGGTGTACCAGAGGAAACAACACTAGATTCTCTACCAACTG  
>HPV70\_Alpha\_1173493\_nt5181\_Genome\_Tile\_rc|1  
ATCTGTAGATTCAGAGGTAAGTAAAGGTGTCATCTCAATGTCTTCTGTTGCAGTAATGTT  
>HPV70\_Alpha\_1173493\_nt5221\_Genome\_Tile\_rc|1  
CATTATCTATATCTGCATCTGCATATATATCATATAAACCATCTGTAGATTCAGAGGTAA  
>HPV70\_Alpha\_1173493\_nt5261\_Genome\_Tile\_rc|1  
GGTCCTGTAGAACCCTGTATGAGAAGTAGTATGTAACATTGCATTATCTATATCTGCATCT  
>HPV70\_Alpha\_1173493\_nt5281\_Genome\_Tile\_rc|1  
GAAATGAAAGATGGGACCTAGGTCCTGTAGAACCCTGTATGAGAAGTAGTATGTAACATTG  
>HPV70\_Alpha\_1173493\_nt5301\_Genome\_Tile\_rc|1  
CACTGTAGAAGGTATAGAAGGAAATGAAAGATGGGACCTAGGTCTGTAGAACCCTGTATG  
>HPV70\_Alpha\_1173493\_nt5321\_Genome\_Tile\_rc|1  
GTATTACTATATTTTGTAGACACTGTAGAAGGTATAGAAGGAAATGAAAGATGGGACCTA

>HPV70\_Alpha\_1173493\_nt5341\_Genome\_Tile\_rc|1  
AAGTAGTAAATGGAATGGTTGTATTACTATATTTTGTAGACACTGTAGAAGGTATAGAAG  
>HPV70\_Alpha\_1173493\_nt5361\_Genome\_Tile\_rc|1  
GGTTACAGGTATGTCCCAAGAAGTAGTAAATGGAATGGTTGTATTACTATATTTTGTAGA  
>HPV70\_Alpha\_1173493\_nt5381\_Genome\_Tile\_rc|1  
AAACTATGTCAGGGCCAGTGGTTACAGGTATGTCCCAAGAAGTAGTAAATGGAATGGTT  
>HPV70\_Alpha\_1173493\_nt5401\_Genome\_Tile\_rc|1  
AATTGGGGGATGCAGTAGGTAAACTATGTCAGGGCCAGTGGTTACAGGTATGTCCCAAG  
>HPV70\_Alpha\_1173493\_nt5421\_Genome\_Tile\_rc|1  
TGTAGGAGGGACAAAGGGCAAATTGGGGGATGCAGTAGGTAAACTATGTCAGGGCCAGT  
>HPV70\_Alpha\_1173493\_nt6381\_Genome\_Tile\_rc|1  
GGACGCTCACGTATATCCGTGCCTTTAATATATAACTCTGAAGGTATTGTGTCGCCCACC  
>HPV70\_Alpha\_1173493\_nt6401\_Genome\_Tile\_rc|1  
GGGAATATACATGAGTACCAGGACGCTCACGTATATCCGTGCCTTTAATATATAACTCTG  
>HPV70\_Alpha\_1173493\_nt6801\_Genome\_Tile\_rc|1  
GCTGCTGATTGTAAATACCTATACGTGTCCACCAAGCTTGCAGATGGTGGAGGGGTAAC  
>HPV70\_Alpha\_1173493\_nt7001\_Genome\_Tile\_rc|1  
ACGATTTAGCTGACGCAGGGCGTTTGCGAGGGCCTATAGTAGGACGTCTGCGAGCCCCTA  
>HPV70\_Alpha\_1173493\_nt7021\_Genome\_Tile\_rc|1  
GTGTTTAGAGGCTGAGGAAGACGATTTAGCTGACGCAGGGCGTTTGCGAGGGCCTATAGT  
>HPV70\_Alpha\_1173493\_nt7081\_Genome\_Tile\_rc|1  
ATAGTACAATAATACACAGCATACAACATACATACATTACTTGGACACACGTTTCCGTTT  
>HPV70\_Alpha\_1173493\_nt7141\_Genome\_Tile\_rc|1  
CATACAAACACAAATATGTAAACAGTGTGCAAGCATACAACATAAAAAACACAAATATGTA  
>HPV70\_Alpha\_1173493\_nt7181\_Genome\_Tile\_rc|1  
ACCAGGACAAACATATACAGTACAGTGTGCAAGCATACAACATACAAACACAAATATGTA  
>HPV70\_Alpha\_1173493\_nt7201\_Genome\_Tile\_rc|1  
ACATACAACCACAAATATGTACCAGGACAAACATATACAGTACAGTGTGCAAGCATACAA  
>HPV70\_Alpha\_1173493\_nt7221\_Genome\_Tile\_rc|1  
ACATAGCACGCAACATATACACATACAACCACAAATATGTACCAGGACAAACATATACAG  
>HPV70\_Alpha\_1173493\_nt7441\_Genome\_Tile\_rc|1  
TATACAGGTAACCCACTATAAAATATAAATGTATAAACTACAAATGGTATACACACACCT  
>HPV70\_Alpha\_1173493\_nt7461\_Genome\_Tile\_rc|1  
ACACAAAATGGCCGTTGCTGTATACAGGTAACCCACTATAAAATATAAATGTATAAACTA  
>HPV70\_Alpha\_1173493\_nt7541\_Genome\_Tile\_rc|1  
ACAGGACATGTTTTTGCTGATACAAAAGGTTTATAAGGGTAACTGATGGTACAAAGCCAA  
>HPV70\_Alpha\_1173493\_nt7561\_Genome\_Tile\_rc|1  
TATGTAGGTGAACCTTAGGTTACAGGACATGTTTTTGCTGATACAAAAGGTTTATAAGGGT  
>HPV70\_Alpha\_1173493\_nt7601\_Genome\_Tile\_rc|1  
TAAGTGTAGGTGCGCCACTAAACTGTAGTAGTGCCAAGTATGTAGGTGAACCTTAGGTT  
>HPV70\_Alpha\_1173493\_nt7681\_Genome\_Tile\_rc|1  
TAAAAGCACTTTATTAGACAGGGTGGAGGTGCATAAGGTTGCCAAAGCATTTGTTGTAGTG  
>HPV70\_Alpha\_1173493\_nt7761\_Genome\_Tile\_rc|1  
ACGACACATTCTTGGATGTAAAAGCTGTTATACAGGCCAACTATGCTCTTAGGTAAGTAA  
>HPV70\_Alpha\_1173493\_nt7801\_Genome\_Tile\_rc|1  
GTCTGTAAAAATATTAGTCACAAAATATAACTTGCACCAAACGACACATTCTTGGATGTA  
>HPV8\_Beta\_333074\_nt0001\_Genome\_Tile\_rc|1  
AACAACCTTATGATTAAGAAATTTTCATACCGCACCTGGTACACTGATGAACTTACCGTT  
>HPV8\_Beta\_333074\_nt0021\_Genome\_Tile\_rc|1  
AGACGATGGTTGTTGGCAATAACAACCTTATGATTAAGAAATTTTCATACCGCACCTGGTA  
>HPV8\_Beta\_333074\_nt0121\_Genome\_Tile\_rc|1  
GCACAAGTCACAGCATTGTAACAATATATATATATATTTATTTATTTATTTAATATACAA  
>HPV8\_Beta\_333074\_nt0141\_Genome\_Tile\_rc|1  
TCCATTTGCTTAGGAAAATTGCACAAGTCACAGCATTGTAACAATATATATATATATTTA  
>HPV8\_Beta\_333074\_nt0161\_Genome\_Tile\_rc|1

ATGAAGCCTTGTCTGCCCGTCCATTTGCTTAGGAAAATTGCACAAGTCACAGCATTGTA  
>HPV8\_Beta\_333074\_nt0181\_Genome\_Tile\_rc|1  
GTCCTTATTAGTGTCTAAATATGAAGCCTTGTCTGCCCGTCCATTTGCTTAGGAAAATT  
>HPV8\_Beta\_333074\_nt0241\_Genome\_Tile\_rc|1  
ACAGTCCTGCAATGGAATACCTAAAGCCGCAGCTAACTCTTTAATAGTAGAGGGTAGCTC  
>HPV8\_Beta\_333074\_nt0281\_Genome\_Tile\_rc|1  
AGAAATCCAAAAAGTTACCACAAAAGTTGCACGGTACTGAACAGTCCTGCAATGGAATAC  
>HPV8\_Beta\_333074\_nt0321\_Genome\_Tile\_rc|1  
ATTAGGCACAGTCTCTTTTTGTCAAACCTCACACAGTTCTAAGAAATCCAAAAAGTTACCA  
>HPV8\_Beta\_333074\_nt0381\_Genome\_Tile\_rc|1  
AACGTTGCGGTTGCTACACAACAACAACGACAACACGCAGTAACAACGTAATTTTTCCAA  
>HPV8\_Beta\_333074\_nt0501\_Genome\_Tile\_rc|1  
ATGATATCCAAAAATGACAAGCAGTTTGTGACACCTAACGTCTATCTCAAAAAATTGAACGT  
>HPV8\_Beta\_333074\_nt0841\_Genome\_Tile\_rc|1  
AGCAATTCTTGAAAGGTCCTGATACCCGAATCAGTTGCGTTGACAAAAAGACGTAGCTTG  
>HPV8\_Beta\_333074\_nt0861\_Genome\_Tile\_rc|1  
GAAGCTGTAGGTCTCTGAACAGCAATTCTTGAAAGGTCCTGATACCCGAATCAGTTGCGT  
>HPV8\_Beta\_333074\_nt1921\_Genome\_Tile\_rc|1  
CAGCATTAGCATCTTCTGGGGCTAGTTTTGCATATCCATAAGCAATGTTCGGCCTCCTCAA  
>HPV8\_Beta\_333074\_nt2081\_Genome\_Tile\_rc|1  
ACTATGGAAGACCAATGCCCTCTCCTTCAACCTCATTGATCCTTGTATATATCCACTCA  
>HPV8\_Beta\_333074\_nt2181\_Genome\_Tile\_rc|1  
ATAGATTAACAAACAGTTTCGCTTAGGTACGGAATGCAAAAAATCTTTTAAGGCAGCTAA  
>HPV8\_Beta\_333074\_nt2481\_Genome\_Tile\_rc|1  
ATAGTTAGCCTCCTCATGCAGGTTAATATTGGAAGTTAACAAAAGGGGAGGAAATTTAAT  
>HPV8\_Beta\_333074\_nt3101\_Genome\_Tile\_rc|1  
CCCCACTGGTGGTTTTGTGCCACTTATCGTCTGCATCAGTGTAGTAAATGTGCTTCCACA  
>HPV8\_Beta\_333074\_nt3441\_Genome\_Tile\_rc|1  
CTTGATCGCCTCTGCTCTTTTTGCGGTCTTGTTCTGCTGGACGGCCGTCTCCCGTACCTT  
>HPV8\_Beta\_333074\_nt4201\_Genome\_Tile\_rc|1  
TATAGTAAAAAGCAAATGGGAATATGTTAGTGTGTTAGTAGCAAGGCAGCGTTAGTAATG  
>HPV8\_Beta\_333074\_nt4221\_Genome\_Tile\_rc|1  
AGCAGTATACAATTAATAAATATAGTAAAAAGCAAATGGGAATATGTTAGTGTGTTAGTA  
>HPV8\_Beta\_333074\_nt4241\_Genome\_Tile\_rc|1  
ACCCGTCTAGCACGCGCCATAGCAGTATACAATTAATAAATATAGTAAAAAGCAAATGGG  
>HPV8\_Beta\_333074\_nt4561\_Genome\_Tile\_rc|1  
CTGAAGGCTCTACAGGGTCAATAGTGTGCGATTGGCAGTATGTCCATAGGACCTACCGCTT  
>HPV8\_Beta\_333074\_nt4581\_Genome\_Tile\_rc|1  
GAGTGGCACCACAGAGGAGACTGAAGGCTCTACAGGGTCAATAGTGTGCGATTGGCAGTAT  
>HPV8\_Beta\_333074\_nt4601\_Genome\_Tile\_rc|1  
TCGGCTCCTGAAGATTCAGTGAGTGGCACCACAGAGGAGACTGAAGGCTCTACAGGGTCA  
>HPV8\_Beta\_333074\_nt4761\_Genome\_Tile\_rc|1  
TGTACGTGAAACTCTGACACGGGTAGGAGGGGTTGGCTCAGGAGCCACCTCTAAAATGGC  
>HPV8\_Beta\_333074\_nt4841\_Genome\_Tile\_rc|1  
AAAATGTGGTCTGCTAGAGAACTTTCTCCTTGTGTAGGTGTGGAATCAGTTATGATTTGA  
>HPV8\_Beta\_333074\_nt4921\_Genome\_Tile\_rc|1  
ACCTACTAGGAAATCTTGACAGTTCTATGACATCTGTTATGTCACTACCTATAGTCTGGC  
>HPV8\_Beta\_333074\_nt4941\_Genome\_Tile\_rc|1  
TTCATCAATCTCAAATGAATACCTACTAGGAAATCTTGACAGTTCTATGACATCTGTTAT  
>HPV8\_Beta\_333074\_nt5001\_Genome\_Tile\_rc|1  
ACGTCTACCAACTACTTGAGGTCTCTCAATAGGTGTGCTACTTTGCCGTGGTGGTGTAGG  
>HPV8\_Beta\_333074\_nt5021\_Genome\_Tile\_rc|1  
TTTGTATAAGAAATACCTCTACGTCTACCAACTACTTGAGGTCTCTCAATAGGTGTGCTA  
>HPV8\_Beta\_333074\_nt5101\_Genome\_Tile\_rc|1  
CAAACTGAACCTTACTAATTTGGAAGGTTTTGATAAAAACAAAGGATCCTCAACAGCCA

>HPV8\_Beta\_333074\_nt5161\_Genome\_Tile\_rc|1  
CGACCATGTCCACATCTTGCTCAAATATATTAGTGACCTCCTCTTCAAATACAGGATTAT  
>HPV8\_Beta\_333074\_nt5381\_Genome\_Tile\_rc|1  
GAATGTTGACCTAATAGTTGGAGTTCTATAGGATCTTCTGTATTGATTGAACTTAAATCC  
>HPV8\_Beta\_333074\_nt5481\_Genome\_Tile\_rc|1  
ATCTGAAAATGCCTGAATACTTTTCAGATAAAGGATTTTCAGAAATATCAACATTTACAAA  
>HPV8\_Beta\_333074\_nt5701\_Genome\_Tile\_rc|1  
GGATTATTACCACCGGAAGATCAGGTGTAGGGTAAATTATTTCCCTCATTATTGCGACTTT  
>HPV8\_Beta\_333074\_nt5721\_Genome\_Tile\_rc|1  
ACCACTGTTATCATGTGTGTGGATTATTACCACCGGAAGATCAGGTGTAGGGTAAATTAT  
>HPV8\_Beta\_333074\_nt7341\_Genome\_Tile\_rc|1  
ACAATCTAATTTTTCCGTTTTTCGTTTTGTGCCCTGACGGAGCCCCCTAGATATAGATTTT  
>HPV66\_Alpha\_1020290\_nt0201\_Genome\_Tile\_rc|1  
TAACTCAATACATGCAAACCTATATAGCTCTAACTTGTAAGTTCCTTTTTGCAGTATAC  
>HPV66\_Alpha\_1020290\_nt0221\_Genome\_Tile\_rc|1  
TTGTTTCTATATACTAGTTTTAACTCAATACATGCAAACCTATATAGCTCTAACTTGTA  
>HPV66\_Alpha\_1020290\_nt1001\_Genome\_Tile\_rc|1  
TAAGTGTATTGTCTATAAATCCATCTACATCTGTATCTGTTTCATTCTCCTCCTCGCTTT  
>HPV66\_Alpha\_1020290\_nt1261\_Genome\_Tile\_rc|1  
CCCGCACCCATTTCCCTTTTTCGTATTCTACCTGTTGTGATGTTTCCAATGTTTCCAATGT  
>HPV66\_Alpha\_1020290\_nt1361\_Genome\_Tile\_rc|1  
GCAATTGGTGTGTTGGTGTTCATATTTGTATCTATATCCATATTTGATACCGAGTGCT  
>HPV66\_Alpha\_1020290\_nt3141\_Genome\_Tile\_rc|1  
ATATGCCTCTGTAATCCACCCCTGATGACACTTTACACCACCCACACTCTCCATTATAAT  
>HPV66\_Alpha\_1020290\_nt3501\_Genome\_Tile\_rc|1  
GTGGACTTCTACTGTTGGCGTTGTTACTGATGTCTGTGTCTGTTGTGACACAGTGTGCGT  
>HPV66\_Alpha\_1020290\_nt3521\_Genome\_Tile\_rc|1  
GTGGCTTTGTGTGTTGATACGTGGACTTCTACTGTTGGCGTTGTTACTGATGTCTGTGTC  
>HPV66\_Alpha\_1020290\_nt3941\_Genome\_Tile\_rc|1  
ATGGCGATTACACGTTACCTTTCCAGTGTTACAATAACACATAATATACCAAATACAAT  
>HPV66\_Alpha\_1020290\_nt4081\_Genome\_Tile\_rc|1  
CCAAAATAAAATAATTAGTATAAGACAACCTTGTAATAAAGATGCAGATAGCAAAAGCGG  
>HPV66\_Alpha\_1020290\_nt4101\_Genome\_Tile\_rc|1  
AATGATGTAGCCACAACAACCAAAATAAAATAATTAGTATAAGACAACCTTGTAATAAA  
>HPV66\_Alpha\_1020290\_nt4121\_Genome\_Tile\_rc|1  
ACAGTATAAAAAGTATCAAAAAATGATGTAGCCACAACAACCAAAATAAAATAATTAGTA  
>HPV66\_Alpha\_1020290\_nt4141\_Genome\_Tile\_rc|1  
TATATAAAAAAATAGTAAAAACAGTATAAAAAGTATCAAAAAATGATGTAGCCACAACAAA  
>HPV66\_Alpha\_1020290\_nt4161\_Genome\_Tile\_rc|1  
CAATATATACACAGTGTAGGTATATAAAAAAATAGTAAAAACAGTATAAAAAGTATCAAAA  
>HPV66\_Alpha\_1020290\_nt4721\_Genome\_Tile\_rc|1  
GCCTCAATTACTGGAGGATCAATATATAGTGGGTTTGTATAGTAGTACTACTTACATGT  
>HPV66\_Alpha\_1020290\_nt4941\_Genome\_Tile\_rc|1  
GTCCAAAAATGCTGGGTCAGTGACCCTAACCTGCTGAAAAGCCCTACTATATAACCTGGG  
>HPV66\_Alpha\_1020290\_nt5761\_Genome\_Tile\_rc|1  
TTTGGTACCAGATTTGGAAACAGAGTAATAAGGATGGCCAACAGCAACCTAGAGCT  
>HPV66\_Alpha\_1020290\_nt6121\_Genome\_Tile\_rc|1  
TGGTGTAGACTTACACACCGCGCCCTTAGTCCAATGTTCCCTAATGCTGGTGCACATCC  
>HPV66\_Alpha\_1020290\_nt6181\_Genome\_Tile\_rc|1  
GTCACCGTCTCTATCGGGGTATTAATACTAATGCAAGAGGTGGACAATCCCCTGTATTACC  
>HPV66\_Alpha\_1020290\_nt6441\_Genome\_Tile\_rc|1  
GGAGGGTCCCTGCCATTGCCACCCTTCCAATACAAATCTGTAGGAATGGCTTCCCCAACA  
>HPV66\_Alpha\_1020290\_nt6801\_Genome\_Tile\_rc|1  
GATAAGCCAATATTCGAATCGTCTAATAAAGTATTATTTCATATTATGCAAAATATGCCATA  
>HPV66\_Alpha\_1020290\_nt6821\_Genome\_Tile\_rc|1

AGCTAGTTGCAACTGGTGGGGATAAGCCAATATTTCCAATCGTCTAATAAAGTATTATTCA  
>HPV66\_Alpha\_1020290\_nt6841\_Genome\_Tile\_rc|1  
ATACCTATATTTATCCTCTAAGCTAGTTGCAACTGGTGGGGATAAGCCAATATTTCCAATC  
>HPV66\_Alpha\_1020290\_nt7041\_Genome\_Tile\_rc|1  
TTAGAGGCAGATACACTAGCCTTGGGTCTAGGGGTCTAGGGCCTAGTTGCATTAAAAAT  
>HPV66\_Alpha\_1020290\_nt7061\_Genome\_Tile\_rc|1  
AGGTAGGAGCCGCCCGCCTTTTAGAGGCAGATACACTAGCCTTGGGTCTAGGGGTCTAG  
>HPV66\_Alpha\_1020290\_nt7081\_Genome\_Tile\_rc|1  
AGCTGGTGAAGAAGAGGAAGAGGTAGGAGCCGCCCGCCTTTTAGAGGCAGATACACTAGC  
>HPV66\_Alpha\_1020290\_nt7141\_Genome\_Tile\_rc|1  
TACAAGCACAAACCATAACAATACATAACAACACACAACACAACTATCGTTTTTTACGTTT  
>HPV66\_Alpha\_1020290\_nt7201\_Genome\_Tile\_rc|1  
ATACATACACATAGCACATACACAATTATAAAATACATAAACATACACAAAAACATACAG  
>HPV66\_Alpha\_1020290\_nt7341\_Genome\_Tile\_rc|1  
ACATTAAACAGTAAGGAACACCACCTAACCTGACACACACTGCCCAAGGATACTACCGCA  
>HPV66\_Alpha\_1020290\_nt7401\_Genome\_Tile\_rc|1  
CAGCACTAAATGGAGTTTGGTGTGTACTATAGTGCATACAAACAACCTATTTAATATA  
>HPV66\_Alpha\_1020290\_nt7661\_Genome\_Tile\_rc|1  
GGGCTACACGCCAACAAAATATATTGCAACACCTGCATAAAAACATATGCCAACAGCG  
>HPV66\_Alpha\_1020290\_nt7681\_Genome\_Tile\_rc|1  
ATACTTGGCTTATACAATAAGGGCTACACGCCAACAAAATATATTGCAACACCTGCATA  
>HPV66\_Alpha\_1020290\_nt7701\_Genome\_Tile\_rc|1  
GTTACATATTTGCAAGACAGATACTTGGCTTATACAATAAGGGCTACACGCCAACAAAAT  
>HPV66\_Alpha\_1020290\_nt7721\_Genome\_Tile\_rc|1  
GTAAAATGAGTAAGTATATGGTTACATATTTGCAAGACAGATACTTGGCTTATACAATAA  
>HPV55\_Alpha\_1020266\_nt6481\_Genome\_Tile\_rc|1  
GAACTGTACTTTTAGTAGCACCTTTAAAAACCAAATCCTGTGGAATGTCCTCTCCAACCG  
>HPV55\_Alpha\_1020266\_nt6701\_Genome\_Tile\_rc|1  
TCTGTACTATTATATGTTGTAGATGGAGACTGAGTTGTAGCAGCACATATTGTCATGTTT  
>HPV55\_Alpha\_1020266\_nt6721\_Genome\_Tile\_rc|1  
GTCGCATGTATTGTTTATATTCTGTACTATTATATGTTGTAGATGGAGACTGAGTTGTAG  
>HPV55\_Alpha\_1020266\_nt7381\_Genome\_Tile\_rc|1  
TGTTTTTATAAAACAACATGGCTGTACATATGTTGTATATTGTATACACCAGACATAACAC  
>HPV44\_Alpha\_1020242\_nt6481\_Genome\_Tile\_rc|1  
GAACAGTATTTTACTAGCACTTTTAATAACCAGATCCTGGGAAACGTCCTCACCAACTG  
>HPV44\_Alpha\_1020242\_nt6701\_Genome\_Tile\_rc|1  
TGTTCACTAGTATATGTAGACGGAGGGGACTGTGTAGTGGCAGCACATATTGTCATGTTT  
>HPV44\_Alpha\_1020242\_nt7381\_Genome\_Tile\_rc|1  
TGTTTTAAAACTAACATGGCTGTACATATGTTATATATTATATATACCAACATAGAACA  
>HPV44\_Alpha\_1020242\_nt7541\_Genome\_Tile\_rc|1  
AGGTGTGTAAGTAAACATAATAAAGTTCTGGCAGAGATGATTAAATATTTTGCTTGCT  
>HPV38\_Beta\_1020234\_nt0061\_Genome\_Tile\_rc|1  
CTTGTACCGATTACGTGTGATGGTTGTTAACCACCATTGTTGCCAGGAATAATAAACCAA  
>HPV38\_Beta\_1020234\_nt0141\_Genome\_Tile\_rc|1  
TGAATACATCCCAAGCTTACAGGCCCTTAAATATATCCTTGTTTTTTTTTTAATTCAT  
>HPV38\_Beta\_1020234\_nt0181\_Genome\_Tile\_rc|1  
TCACTGAGCTGCTGCACAGTTTGAGGTTTGGTAGTTCCATGAATACATCCCAAGCTTAC  
>HPV38\_Beta\_1020234\_nt0201\_Genome\_Tile\_rc|1  
CTACAGGAAGTGTAACTTATCACTGAGCTGCTGCACAGTTTGAGGTTTGGTAGTTCCA  
>HPV38\_Beta\_1020234\_nt0221\_Genome\_Tile\_rc|1  
ACAGGGTAATAACAGATCCTCTACAGGAAGTGTAACTTATCACTGAGCTGCTGCACAGT  
>HPV38\_Beta\_1020234\_nt0241\_Genome\_Tile\_rc|1  
AGGAACTGTTGCAGAATCTACAGGGTAATAACAGATCCTCTACAGGAAGTGTAACTTA  
>HPV38\_Beta\_1020234\_nt0281\_Genome\_Tile\_rc|1  
TAAGTTCTTGTAATCAAACCTCACGTAATTCAATGTACGTGAGGAACTGTTGCAGAATCT



>HPV38\_Beta\_1020234\_nt0301\_Genome\_Tile\_rc|1  
TCTTGAGTCCAGATTAAGTTCTTGTAATCAAACCTCACGTAATTCAATGTACGTG  
>HPV38\_Beta\_1020234\_nt0401\_Genome\_Tile\_rc|1  
TTCAATTTACGCGCCAAAGACAGTTAATTCATAAACTGCTGACATTCATATTGAGCAGA  
>HPV38\_Beta\_1020234\_nt0421\_Genome\_Tile\_rc|1  
ATTGTCTGTTGCTCCACCTGTTCAATTTACGCGCCAAAGACAGTTAATTCATAAACTGC  
>HPV38\_Beta\_1020234\_nt0721\_Genome\_Tile\_rc|1  
AACTATGATTTTGTATGGGGTGTATGCTGGCTCCTCCTCTACCACTGATGCTTCAATATC  
>HPV38\_Beta\_1020234\_nt0761\_Genome\_Tile\_rc|1  
ACACGTATAGTTTGTAGCCTTACTTCACAACCCCCACAAAGAACTATGATTTTGTATGGGG  
>HPV38\_Beta\_1020234\_nt1341\_Genome\_Tile\_rc|1  
TTGCTCTGCTGTTACTGCTCCTTAAAAGATCTCTTACAGTACCCAGCCCTATATCACCCCT  
>HPV38\_Beta\_1020234\_nt1361\_Genome\_Tile\_rc|1  
TTTAAATTTGCTTAACAGTGTGCTCTGCTGTTACTGCTCCTTAAAAGATCTCTTACAGT  
>HPV38\_Beta\_1020234\_nt1641\_Genome\_Tile\_rc|1  
GTGGCTCTGACAATATATGATTTTCATGCACCTGTAATAATGTAGCTATTAGTCTTACAA  
>HPV38\_Beta\_1020234\_nt1741\_Genome\_Tile\_rc|1  
TGTGATAGAATCCAATCAGGAGCTTCACCAAAACAAAACACATTACTATTCAAACCTTCCT  
>HPV38\_Beta\_1020234\_nt1961\_Genome\_Tile\_rc|1  
TCCTCTTTTATAATATCTTACCATTAAAGCACACTCTTTAACATATTTAACTTGGCTGTT  
>HPV38\_Beta\_1020234\_nt2041\_Genome\_Tile\_rc|1  
ATATGCTGCCAATTGCCTTCTCCTTCAACTTTAGATATGCAGTGATGAATCCAAGCAGAA  
>HPV38\_Beta\_1020234\_nt2061\_Genome\_Tile\_rc|1  
GGTATCTAATAAACCTAACAAATATGCTGCCAATTGCCTTCTCCTTCAACTTTAGATATGC  
>HPV38\_Beta\_1020234\_nt2081\_Genome\_Tile\_rc|1  
CATAATAAAATTCAAATTTTGGTATCTAATAAACCTAACAAATATGCTGCCAATTGCCTTC  
>HPV38\_Beta\_1020234\_nt2101\_Genome\_Tile\_rc|1  
GTCCGAAACTTATCTAGAAACATAATAAAATTCAAATTTTGGTATCTAATAAACCTAACAA  
>HPV38\_Beta\_1020234\_nt2221\_Genome\_Tile\_rc|1  
GCAAAAGATACTACACTACCTTTCAATAGTTTAAATAAGTGACATTGCAAACATAGACTTT  
>HPV38\_Beta\_1020234\_nt2241\_Genome\_Tile\_rc|1  
AAAATTGACTTTTTCGAATTAGCAAAAGATACTACACTACCTTTCAATAGTTTAAATAAGTG  
>HPV38\_Beta\_1020234\_nt2461\_Genome\_Tile\_rc|1  
CTACTGTGTAAAAATCTGTATCGTTCCCTCTTTTAAATAAATTAATATTGGAAGTAATAATT  
>HPV38\_Beta\_1020234\_nt2481\_Genome\_Tile\_rc|1  
GAAAATCAATTTGTGTTACTCTACTGTGTAAAAATCTGTATCGTTCCCTCTTTTAAATAAAT  
>HPV38\_Beta\_1020234\_nt2741\_Genome\_Tile\_rc|1  
TAGTGATAAAATAATTTGCTCTTGTCTTAAAAGCTGCCAATGCTGAATTTGTGTATCCAGG  
>HPV38\_Beta\_1020234\_nt2781\_Genome\_Tile\_rc|1  
AGGTTGATAGCCCAATCGAGTAACACCATGTCTCCTTGCATAGTGATAAAATAATTTGCTC  
>HPV38\_Beta\_1020234\_nt2841\_Genome\_Tile\_rc|1  
TAAAAGGACCATAGAAATGGCATCTTTTGTCTTGGCTTCTGAACTTGCCAAAGAAGGTAC  
>HPV38\_Beta\_1020234\_nt2861\_Genome\_Tile\_rc|1  
GATTTTTTTCAGGCTTTCAGTAAAAGGACCATAGAAATGGCATCTTTTGTCTTGGCTTCT  
>HPV38\_Beta\_1020234\_nt2881\_Genome\_Tile\_rc|1  
ATTGTTTCATCTGCATATTTGGATTTTTTCAGGCTTTCAGTAAAAGGACCATAGAAATGG  
>HPV38\_Beta\_1020234\_nt2921\_Genome\_Tile\_rc|1  
GGGCTGCGAACAGCCTCCAGGCTAGTTTGAGCTAATGTCCATTGTTTCATCTGCATATTTG  
>HPV38\_Beta\_1020234\_nt3061\_Genome\_Tile\_rc|1  
GGCCTTCCACTTTTTCCCATATGTCCTCATCTGTCAGGTAATATATATATGTCCACACAG  
>HPV38\_Beta\_1020234\_nt3141\_Genome\_Tile\_rc|1  
TCGTTTAGCATCATTTTCAAATTTTAAATAATACACCTTTAATTTGCCCTCATAATAATA  
>HPV38\_Beta\_1020234\_nt3401\_Genome\_Tile\_rc|1  
CTTCTCCTTTGGGTGCCTGTGGTTTCTCTTTGTCTTTTCTTTGCCTGCGGGAGGTGGTT  
>HPV38\_Beta\_1020234\_nt3461\_Genome\_Tile\_rc|1

GAGGATCGCCGGGTGTCCCTCCCTCCCTGTTGGTGCTTCGGGACCTTGATCTGCTTTTT  
>HPV38\_Beta\_1020234\_nt3801\_Genome\_Tile\_rc|1  
TGCATCTCCTATCCATGACCATGTTGTGCTAACAAAGCGAAAGCCACCAGCATGTTTTTT  
>HPV38\_Beta\_1020234\_nt3841\_Genome\_Tile\_rc|1  
AAGCTAGAAGCATTTCGTGAGCGCCCTATGCGATCATTTGATGCATCTCCTATCCATGACC  
>HPV38\_Beta\_1020234\_nt3881\_Genome\_Tile\_rc|1  
ATAGTCTGTATAAACTTTTCTCTTTGTGATTCTGAATAAAAAGCTAGAAGCATTTCGTGAG  
>HPV38\_Beta\_1020234\_nt3961\_Genome\_Tile\_rc|1  
ATATAAAAAATATCTCTTATAGATTATTCTATAAATCATCAAATTGTCCTAATGACCACT  
>HPV38\_Beta\_1020234\_nt4521\_Genome\_Tile\_rc|1  
GTGGATGAGGGTCAGCCACTTCCAATATAGCATTGGTATTGCGGCCTCCACTCACAACAG  
>HPV38\_Beta\_1020234\_nt4541\_Genome\_Tile\_rc|1  
GCTAACAGTAGCTCTAGTGGGTGGATGAGGGTCAGCCACTTCCAATATAGCATTGGTATT  
>HPV38\_Beta\_1020234\_nt4581\_Genome\_Tile\_rc|1  
CAGAAATTATTTGGAAAGCAGGATTATTATATTGAGTTCTGCTAACAGTAGCTCTAGTGG  
>HPV38\_Beta\_1020234\_nt4601\_Genome\_Tile\_rc|1  
TCCAGAGGTAGGGATTACTTCAGAAATTATTTGGAAAGCAGGATTATTATATTGAGTTCT  
>HPV38\_Beta\_1020234\_nt4641\_Genome\_Tile\_rc|1  
ACCC TTCAGACACTAACACGTGATCTGCAAGAGAAGACTCTCCAGAGGTAGGGATTACTT  
>HPV38\_Beta\_1020234\_nt4681\_Genome\_Tile\_rc|1  
TCTTCTGCTGTTCTGGTACCTCCTATCTGCTGGCCACCAGACCCTTCAGACACTAACACG  
>HPV38\_Beta\_1020234\_nt4801\_Genome\_Tile\_rc|1  
GCTCTGCGTAATGATGAAAACCTGTTGTCTTGCTCTTTGTAAGGGGGTGCTAGTTCTTCGC  
>HPV38\_Beta\_1020234\_nt4821\_Genome\_Tile\_rc|1  
TTAGCCTTCTATTATATAATGCTCTGCGTAATGATGAAAACCTGTTGTCTTGCTCTTTGTA  
>HPV38\_Beta\_1020234\_nt4841\_Genome\_Tile\_rc|1  
AGTGACACCCACTTGCTCAGTTAGCCTTCTATTATATAATGCTCTGCGTAATGATGAAAA  
>HPV38\_Beta\_1020234\_nt4861\_Genome\_Tile\_rc|1  
GATGTGAAAAATAAAGGGTCAGTGACACCCACTTGCTCAGTTAGCCTTCTATTATATAAT  
>HPV38\_Beta\_1020234\_nt4881\_Genome\_Tile\_rc|1  
AACGCACCAATTTGGAAGGTGATGTGAAAAATAAAGGGTCAGTGACACCCACTTGCTCAG  
>HPV38\_Beta\_1020234\_nt5041\_Genome\_Tile\_rc|1  
CGACTCACTCTAACATATCCCTCTGCAGACTCAGTTAATGTTGGCCTACCTAATTTAAC  
>HPV38\_Beta\_1020234\_nt5061\_Genome\_Tile\_rc|1  
TCGTTCCCGTCTTCCCAAACGACTCACTCTAACATATCCCTCTGCAGACTCAGTTAATG  
>HPV38\_Beta\_1020234\_nt5081\_Genome\_Tile\_rc|1  
TGTACCACTGCGTGTTCCGGATCGTTCCCCGTCTTCCCAAACGACTCACTCTAACATATCC  
>HPV38\_Beta\_1020234\_nt5101\_Genome\_Tile\_rc|1  
TGTA CTTGTTGATCCTATTTGTGTACCACTGCGTGTTCCGGATCGTTCCCCGTCTTCCCAA  
>HPV38\_Beta\_1020234\_nt5281\_Genome\_Tile\_rc|1  
AAAGTATCTGGATCCATAGAAGTTTCTGTAAGAACACCTTCAGGAACCTCAGTCACATTT  
>HPV38\_Beta\_1020234\_nt5301\_Genome\_Tile\_rc|1  
GTAATAAATCCTCTGAATTAAAAGTATCTGGATCCATAGAAGTTTCTGTAAGAACACCTT  
>HPV38\_Beta\_1020234\_nt5321\_Genome\_Tile\_rc|1  
GTCTTCTATAGCATCATCCAGTAATAAATCCTCTGAATTAAAAGTATCTGGATCCATAGA  
>HPV38\_Beta\_1020234\_nt5381\_Genome\_Tile\_rc|1  
TACAGTGATTGACGTAGTGGATCTGCGTGGAGTTCCTACAACCTAAGATCCGCTGAA  
>HPV38\_Beta\_1020234\_nt5401\_Genome\_Tile\_rc|1  
TGAGGAGTCTGAAATCTAGGTACAGTGATTGACGTAGTGGATCTGCGTGGAGTTCCTACA  
>HPV38\_Beta\_1020234\_nt5421\_Genome\_Tile\_rc|1  
GATAATATATGGTAGGATTTTGAGGAGTCTGAAATCTAGGTACAGTGATTGACGTAGTGG  
>HPV38\_Beta\_1020234\_nt5441\_Genome\_Tile\_rc|1  
ATGATACCCCTGTATATCCTGATAATATATGGTAGGATTTTGAGGAGTCTGAAATCTAGG  
>HPV38\_Beta\_1020234\_nt5461\_Genome\_Tile\_rc|1  
CTGCTTTCGGGATATGAAACATGATACCCCTGTATATCCTGATAATATATGGTAGGATTT

>HPV38\_Beta\_1020234\_nt5481\_Genome\_Tile\_rc|1  
AAATAATGGCGGGTCTTTCTCTGCTTTCGGGATATGAAACATGATACCCCTGTATATCCT  
>HPV38\_Beta\_1020234\_nt5501\_Genome\_Tile\_rc|1  
AGGAATATCGGGTGTAGGATAAATAATGGCGGGTCTTTCTCTGCTTTCGGGATATGAAAC  
>HPV38\_Beta\_1020234\_nt5541\_Genome\_Tile\_rc|1  
AAAAATCTCCAGAGGAATCAGCAACATGTATACTACTGTAGGAATATCGGGTGTAGGAT  
>HPV38\_Beta\_1020234\_nt7141\_Genome\_Tile\_rc|1  
AAAACGGTTACTGGGTCCTTTTGCGTTTTACAGATTTGGAAGATTTTCTTACTAACGGCC  
>HPV37\_Beta\_1020226\_nt0161\_Genome\_Tile\_rc|1  
TTGAGGCTTAGGCCTAGCCATATATTCTCTTAAGTATTGCTCATCATATTTATTTAGATC  
>HPV37\_Beta\_1020226\_nt0381\_Genome\_Tile\_rc|1  
CTGAGTGCTCATAGAACTGGTAAATTCAAACGTGTGCTGTAGCATAGGCACAGCTAGTAC  
>HPV37\_Beta\_1020226\_nt0401\_Genome\_Tile\_rc|1  
TTCTATCTCCCTCCCACTAACTGAGTGCTCATAGAACTGGTAAATTCAAACTGTGCTGT  
>HPV37\_Beta\_1020226\_nt0501\_Genome\_Tile\_rc|1  
GCTGAGTATAGCAAGTCTCCAACCTCTCTAACAAATCCAATAAATTAAAGCAAATTTGC  
>HPV37\_Beta\_1020226\_nt0821\_Genome\_Tile\_rc|1  
AGTTTGGACAAACCAGCTGCACTTCACCAAGTAATAGCTCTTCTTGATCTAATTCCAA  
>HPV37\_Beta\_1020226\_nt2121\_Genome\_Tile\_rc|1  
GAGTGTTATGCAAAAATGATTTAAAGACATCTAGAAACCTTATAAAATTGATATCTTGA  
>HPV37\_Beta\_1020226\_nt2141\_Genome\_Tile\_rc|1  
TAAAGACAATTCTTTTTAGGAGTGTTATGCAAAAATGATTTAAAGACATCTAGAAACCT  
>HPV37\_Beta\_1020226\_nt2301\_Genome\_Tile\_rc|1  
ACACATGCGTGACGTCATCTATTAAAGCAATTTTAGTATCTGCCAACGGCTGCAACCAA  
>HPV37\_Beta\_1020226\_nt2741\_Genome\_Tile\_rc|1  
TGAAACAGGATCTGCTCCTGCCTTAGAAGTTGCCAATGCATAATTTGGGTCTCTAGGTCA  
>HPV37\_Beta\_1020226\_nt2901\_Genome\_Tile\_rc|1  
AGTTTGTGTAAGTGTCAGGACTCTTTACCATAAGCAGACTGTTGTAAACTTTCTAATAA  
>HPV37\_Beta\_1020226\_nt3281\_Genome\_Tile\_rc|1  
GCGAGCGGCGACCCGATACGGTGTGGACGGAGGCTGCCCCGTCTGTCCCTTCTCCAGCT  
>HPV37\_Beta\_1020226\_nt3821\_Genome\_Tile\_rc|1  
GTGGTACTGTAGTACTTAAGTAGGTTTCCATGCTTTTTTCTTAGCTCTATAGCGATAGCAT  
>HPV37\_Beta\_1020226\_nt3921\_Genome\_Tile\_rc|1  
AGTTTTTTAAAAACAACCTCTCTTCTGTATTGGATTGAAATGCAAGTAACATGCGTGACCT  
>HPV37\_Beta\_1020226\_nt3941\_Genome\_Tile\_rc|1  
ACTCCTGGTGTGAATTTTCATAGTTTTTAAAAACAACCTCTCTTCTGTATTGGATTGAAAT  
>HPV37\_Beta\_1020226\_nt4001\_Genome\_Tile\_rc|1  
GTTAGTTTGTATATAAAAAAGCTGTTTTACAAATTCATCTAAATGACCCAGTGACCAATCA  
>HPV37\_Beta\_1020226\_nt4021\_Genome\_Tile\_rc|1  
GTAGCAAAAAGCAAAAGCAATGTTAGTTTGTATATAAAAAAGCTGTTTTCACAATTCATCTA  
>HPV37\_Beta\_1020226\_nt4041\_Genome\_Tile\_rc|1  
ATTGGAACGTTAGTAGGTTAGTAGCAAAAAGCAAAAGCAATGTTAGTTTGTATATAAAAAAG  
>HPV37\_Beta\_1020226\_nt4921\_Genome\_Tile\_rc|1  
TAATTGTGAGGGTCTACTCAAGAATAAAGGATCCGTGACTGCTACCTGTTCTGTTAATCT  
>HPV37\_Beta\_1020226\_nt4941\_Genome\_Tile\_rc|1  
TTGTCAAACGTGAACTGTACTAATTGTGAGGGTCTACTCAAGAATAAAGGATCCGTGACT  
>HPV37\_Beta\_1020226\_nt5101\_Genome\_Tile\_rc|1  
ACGACGTCTAATCTGCTTACTCTTAAATACGCTTGTGGTGTTCAGCAACAGTAGGTCT  
>HPV37\_Beta\_1020226\_nt5121\_Genome\_Tile\_rc|1  
CTACGAGTACGGATGGTAGCACGACGTCCTAATCTGCTTACTCTTAAATACGCTTGTGGT  
>HPV37\_Beta\_1020226\_nt5301\_Genome\_Tile\_rc|1  
TGCCCTATATTTAAGGGACCTGGTTCATCAATATTTATATCAACAAATGAACTTTCTACA  
>HPV37\_Beta\_1020226\_nt5321\_Genome\_Tile\_rc|1  
CTGCCATAGTAGACTCTTGTTGCCCTATATTTAAGGGACCTGGTTCATCAATATTTATAT  
>HPV37\_Beta\_1020226\_nt5341\_Genome\_Tile\_rc|1

AGAATTAAAAATCTGTGTCATCTGCCATAGTAGACTCTTGTTGCCCTATATTTAAGGGACC  
>HPV37\_Beta\_1020226\_nt5361\_Genome\_Tile\_rc|1  
TCCTCTAACAAATAAATCTGCAGAATTAATAATCTGTGTCATCTGCCATAGTAGACTCTTGT  
>HPV37\_Beta\_1020226\_nt5441\_Genome\_Tile\_rc|1  
ATCTAGGTATTGTGATAGAATTTGTACTGCGCGTGAGGTTCCAAAAACCAACTGAGATC  
>HPV37\_Beta\_1020226\_nt5521\_Genome\_Tile\_rc|1  
TGTGTACCGTGACTCAGGATAGGCTACATTGTAACCTTGAATATCTTGTATATAAAATCC  
>HPV37\_Beta\_1020226\_nt5541\_Genome\_Tile\_rc|1  
TGTGGCAAGATAACTTGTGTTGTGTACCGTGACTCAGGATAGGCTACATTGTAACCTTGA  
>HPV36\_Beta\_1020218\_nt0121\_Genome\_Tile\_rc|1  
ACCCAACCTTTGAAGCATATATATATATATTTATTTATTTATTTATACTATACAGTATAT  
>HPV36\_Beta\_1020218\_nt0141\_Genome\_Tile\_rc|1  
TTTGCCTTAATTATTAAAAAACCAACCTTTGAAGCATATATATATATATTTATTTATTT  
>HPV36\_Beta\_1020218\_nt0161\_Genome\_Tile\_rc|1  
TTCGGAGGCTTGCTCTGCCATTTGCCTTAATTATTAAAAAACCAACCTTTGAAGCATAT  
>HPV36\_Beta\_1020218\_nt0181\_Genome\_Tile\_rc|1  
TTTTCTGTAATATTCTGCTGTTTCGGAGGCTTGCTCTGCCATTTGCCTTAATTATTAAAA  
>HPV36\_Beta\_1020218\_nt0201\_Genome\_Tile\_rc|1  
AAGGCAGCTGTTCTTTTTCTTTTTCTGTAATATTCTGCTGTTTCGGAGGCTTGCTCTGCCA  
>HPV36\_Beta\_1020218\_nt0281\_Genome\_Tile\_rc|1  
AAATTTGCCACAAAAGTTACAAGGTATTAGACAGTCTACAAACGGAATGCCTAATGATTC  
>HPV36\_Beta\_1020218\_nt0501\_Genome\_Tile\_rc|1  
GAAAAGCTAAGCACGTCTGACACCTAATGTCAATTTCAAATATGGAGCGACCTGCAGCCA  
>HPV36\_Beta\_1020218\_nt2061\_Genome\_Tile\_rc|1  
ACCTCATGTATTTTAGTATAGATCCATTCCGACATGGACATATCCCTCATTTGACCTTTT  
>HPV36\_Beta\_1020218\_nt2381\_Genome\_Tile\_rc|1  
AACCGTTTCTTAGATAATTATCCATATATAACCAACAGGGGTCAGTTACATCATCAATCA  
>HPV36\_Beta\_1020218\_nt2401\_Genome\_Tile\_rc|1  
TGAGACATAATGCCCATCTAAACCGTTTCTTAGATAATTATCCATATATAACCAACAGGG  
>HPV36\_Beta\_1020218\_nt2421\_Genome\_Tile\_rc|1  
GCTTTGTATTTACAATCCAATGAGACATAATGCCCATCTAAACCGTTTCTTAGATAATTA  
>HPV36\_Beta\_1020218\_nt2961\_Genome\_Tile\_rc|1  
TAAAAGTTTCTATACTGGTGTCAACTAATGTCCAAGTTTCAGATGCATATTCAGACGTTT  
>HPV36\_Beta\_1020218\_nt3101\_Genome\_Tile\_rc|1  
TCTGGCTTTATGCCACACATCGTCTTCCATATAATACACGTATGTCCACATAGTGTACAA  
>HPV36\_Beta\_1020218\_nt3621\_Genome\_Tile\_rc|1  
CTCCCCCTTCTAGAGGTGCTTCTGGATCGTGATCTGGTTGATACCCGCTGGACCCAGTCT  
>HPV36\_Beta\_1020218\_nt3641\_Genome\_Tile\_rc|1  
CCGTGACCTCCGCTTCTACCTCCCCCTTCTAGAGGTGCTTCTGGATCGTGATCTGGTTGA  
>HPV36\_Beta\_1020218\_nt4201\_Genome\_Tile\_rc|1  
CAGCATAGCATTAGTGTTAGAGACTGTCAAGGTTGCCATATGATTTTTCAACTCCTTTC  
>HPV36\_Beta\_1020218\_nt4241\_Genome\_Tile\_rc|1  
AGTATAAAAAGCTAATTTGTTAGTGTTGTTAGTAGCAAAGCAGCATAGCATTAGTGTTA  
>HPV36\_Beta\_1020218\_nt4261\_Genome\_Tile\_rc|1  
TGCAGGTACAAAAGTAAAAAAGTATAAAAAGCTAATTTGTTAGTGTTGTTAGTAGCAAAG  
>HPV36\_Beta\_1020218\_nt4281\_Genome\_Tile\_rc|1  
ACCCTTTTAGCACGCGCCATTGCAGGTACAAAAGTAAAAAAGTATAAAAAGCTAATTTGT  
>HPV36\_Beta\_1020218\_nt4941\_Genome\_Tile\_rc|1  
AGTTCAATTTTCATCAGTAATATCAGCCCCCTATTCTTTGTCCCCCGGACCCCTGATGTCAC  
>HPV36\_Beta\_1020218\_nt4961\_Genome\_Tile\_rc|1  
ATCTACTAGGAAGTTCTTGAAGTTCAATTTTCATCAGTAATATCAGCCCCCTATTCTTTGTC  
>HPV36\_Beta\_1020218\_nt5021\_Genome\_Tile\_rc|1  
TGGCCTGTAAAGGTGTGCTGCTACGTCTAGGTGGAGTTGGTTCTTCATTTTCAAAGTAT  
>HPV36\_Beta\_1020218\_nt5041\_Genome\_Tile\_rc|1  
CCGTCTACCTGCAGCTCGTGTGGCCTGTAAAGGTGTGCTGCTACGTCTAGGTGGAGTTGG

>HPV36\_Beta\_1020218\_nt5061\_Genome\_Tile\_rc|1  
TTAGTTAAAGAAACACCTCTCCGTCTACCTGCAGCTCGTGTGGCCTGTAAAGGTGTGCTG  
>HPV36\_Beta\_1020218\_nt5301\_Genome\_Tile\_rc|1  
GTACCTAATCTACTAACCCTCACATACCCTGCAGGAGTTGTAGAATATTGGGGACGACCC  
>HPV36\_Beta\_1020218\_nt5321\_Genome\_Tile\_rc|1  
GCGTGCGAATGGTTGCACGAGTACCTAATCTACTAACCCTCACATACCCTGCAGGAGTTG  
>HPV36\_Beta\_1020218\_nt5521\_Genome\_Tile\_rc|1  
ATCAGAAAAGGCTTCCACACTTTTCAGACAAAGGATTTTCAGACACATTTACGTCTATAAA  
>HPV36\_Beta\_1020218\_nt5681\_Genome\_Tile\_rc|1  
CTGGGTATGCAACATAATATCCTTTACTGTCCCTGGACATAATAAGAACCCTCCTAGTAG  
>HPV36\_Beta\_1020218\_nt7401\_Genome\_Tile\_rc|1  
TGTACCAAAAACGGTCATATTACTGTTTTTCGCTTGCCTTGGTTCCCTCTGGTGAACCCTC  
>HPV36\_Beta\_1020218\_nt7561\_Genome\_Tile\_rc|1  
GGTCGATCTGCTTCCAAGATGATATGTTCTGGCACTAAACAGAGTCTATATTGGCAGCAG  
>HPV36\_Beta\_1020218\_nt7661\_Genome\_Tile\_rc|1  
TTACCGGTCAGCTATCTCAGCCAAAAGCGATTGCCAACAGCGATTGTAGATTAAATCTTC  
>HPV29\_Alpha\_1020210\_nt1261\_Genome\_Tile\_rc|1  
TCCTTTGTACCACTCCCCTCCTTATACTGCTGTCGGCCATTTTGATCACCCGTCTCGCAA  
>HPV29\_Alpha\_1020210\_nt1861\_Genome\_Tile\_rc|1  
TGTACCATTTTCAGATAAACTGAACGTACTTCTTGTAATGCGTGACCTACCATTGTCTGT  
>HPV29\_Alpha\_1020210\_nt3881\_Genome\_Tile\_rc|1  
GTCGACACAGATAAAAATCCAGGCTGCTACACGTTGTGGCACAGTAGTCAAAACACAGAC  
>HPV29\_Alpha\_1020210\_nt4001\_Genome\_Tile\_rc|1  
AATATAGTGCCACCAATCCTAGGTATAAACACAACACAATGGCCAAAGTAGCAAGTAAGCG  
>HPV29\_Alpha\_1020210\_nt4041\_Genome\_Tile\_rc|1  
ATAGCCTAAGTGTTCGTGCAATGTGCTGCACAACCTTGTAATATAGTGCCACCAATCCT  
>HPV29\_Alpha\_1020210\_nt4061\_Genome\_Tile\_rc|1  
TAATTATTATAGGATACATGATAGCCTAAGTGTTTCGTGCAATGTGCTGCACAACCTGTA  
>HPV29\_Alpha\_1020210\_nt4161\_Genome\_Tile\_rc|1  
ACTATAAATAACAACAGGCATACCATTAGTATTAACAATCCCAACACATACACGTCCCTT  
>HPV29\_Alpha\_1020210\_nt4281\_Genome\_Tile\_rc|1  
CACATGCACAATTGTATGGCCATGTATACAATACACGTATTACCACAGCCACATATAAAA  
>HPV29\_Alpha\_1020210\_nt4301\_Genome\_Tile\_rc|1  
AAGTGGTAGAACTTTAAAAACACATGCACAATTGTATGGCCATGTATACAATACACGTAT  
>HPV29\_Alpha\_1020210\_nt4321\_Genome\_Tile\_rc|1  
AACAACAAAAAAAACAAAAAAGTGGTAGAACTTTAAAAACACATGCACAATTGTATGGC  
>HPV29\_Alpha\_1020210\_nt4341\_Genome\_Tile\_rc|1  
TTGAACTGTAAAAACAAAGGAACAACAAAAAAAACAAAAAAGTGGTAGAACTTTAAAAA  
>HPV29\_Alpha\_1020210\_nt4881\_Genome\_Tile\_rc|1  
GTTTCTCCAGTTTGTGGAATTTCCAAGAGTGAAGGCTCGGTGAATAAAGGATTATTAAAG  
>HPV29\_Alpha\_1020210\_nt5601\_Genome\_Tile\_rc|1  
AGAATAATATCAGGGCCCGTGTGTAAAGGCACATCAACTGGCGACACGAATGGAATAGTG  
>HPV29\_Alpha\_1020210\_nt6581\_Genome\_Tile\_rc|1  
GTACAAGGAATCTGGGATTTTGTCCCCTACTACACCAGCACGATTAAAGAAGTGCCTGGC  
>HPV29\_Alpha\_1020210\_nt6621\_Genome\_Tile\_rc|1  
TGGCACTGCCAGGAGTTTCTCGCCCGTTGTTACCCTTTAAGTACAAGGAATCTGGGATTT  
>HPV29\_Alpha\_1020210\_nt6841\_Genome\_Tile\_rc|1  
TCTTTAATCTTGGTAGCATCATAAGTGGTCAACGGTTGAGACTCTGTGGTAGCACACAAC  
>HPV29\_Alpha\_1020210\_nt6861\_Genome\_Tile\_rc|1  
CCTCCCCATGTCTCAAATATTCTTTAATCTTGGTAGCATCATAAGTGGTCAACGGTTGAG  
>HPV29\_Alpha\_1020210\_nt6981\_Genome\_Tile\_rc|1  
GCAATGTCAATCCAAAATTCCAGTCTTCAAGTAAGGCACTGTTTCATAGTATGAAGGTAAG  
>HPV29\_Alpha\_1020210\_nt7221\_Genome\_Tile\_rc|1  
TGGTCTGTTCCGGCGCTTTCTGGAGGGGACTACTGAACGCCGGCGCGCACCGATCTGTAATA  
>HPV29\_Alpha\_1020210\_nt7261\_Genome\_Tile\_rc|1

TTTTTCGAGCGTTTTTCGCTTTGCAGGGGTGGGGCCGTGGTGGTCGTTTCGGCGCTTTCTG  
>HPV29\_Alpha\_1020210\_nt7341\_Genome\_Tile\_rc|1  
GACATACAAACACATATGGTAATAAATACATACACACATTACATTACACAACATACAGCA  
>HPV29\_Alpha\_1020210\_nt7481\_Genome\_Tile\_rc|1  
ATCGGTCCCCTGACCTATACCTTAACCTTCTTACTCAGCAAACAATTATATGTATAAAATA  
>HPV28\_Alpha\_1020202\_nt0081\_Genome\_Tile\_rc|1  
GCACAATAGGAATATGTTTTTAGGCCGTGGTTCATCCATTGAGCTTCTGCCATTCAATGT  
>HPV28\_Alpha\_1020202\_nt0141\_Genome\_Tile\_rc|1  
CACTTTGGCGCAGAATATGCAGTGCAAACGGAGGTCATCAAATGATATTCCACTGTCTCT  
>HPV28\_Alpha\_1020202\_nt0161\_Genome\_Tile\_rc|1  
GATAGCTCCGCTGTGGTCAGCACTTTGGCGCAGAATATGCAGTGCAAACGGAGGTCATCA  
>HPV28\_Alpha\_1020202\_nt2281\_Genome\_Tile\_rc|1  
TTTGAATTGGCATAAGATATTACCACCCACCTAGAAATCTTAATAGACTCATGCAGAAA  
>HPV28\_Alpha\_1020202\_nt3801\_Genome\_Tile\_rc|1  
ACGGTTCGATAATTATACAAACATTGACATATGTCCCAATATTACCTGTATACCAGGTGG  
>HPV28\_Alpha\_1020202\_nt3821\_Genome\_Tile\_rc|1  
TCTGCACACTGTATCACCACACGGTTCGATAATTATACAAACATTGACATATGTCCCAAT  
>HPV28\_Alpha\_1020202\_nt4021\_Genome\_Tile\_rc|1  
CAAAGGATACATAGCAAGGCTTATGTATTGATTTGTACAATATGTGATACAATTCGCAAA  
>HPV28\_Alpha\_1020202\_nt4041\_Genome\_Tile\_rc|1  
CCATTGTTGTCCCTTAGCACCAAGGATACATAGCAAGGCTTATGTATTGATTTGTACAA  
>HPV28\_Alpha\_1020202\_nt4101\_Genome\_Tile\_rc|1  
AATATAAAACAACAATAGATACACGTCATCTGGCTCCAGAAACAGGACAGTATGATCG  
>HPV28\_Alpha\_1020202\_nt4161\_Genome\_Tile\_rc|1  
CTACACAGTTACAAAAACCCAAATGTCTATACAAGATAAACAATGCAAGTATAACAAAA  
>HPV28\_Alpha\_1020202\_nt4181\_Genome\_Tile\_rc|1  
GGTGACCAACTAACACACAACCTACACAGTTACAAAAACCCAAATGTCTATACAAGATAA  
>HPV28\_Alpha\_1020202\_nt4201\_Genome\_Tile\_rc|1  
AGTACTTAAAAATACATTGTGGTGACCAACTAACACACAACCTACACAGTTACAAAAACCC  
>HPV28\_Alpha\_1020202\_nt4221\_Genome\_Tile\_rc|1  
TAGCACACTGGGATATACACAGTACTTAAAAATACATTGTGGTGACCAACTAACACACAA  
>HPV28\_Alpha\_1020202\_nt4261\_Genome\_Tile\_rc|1  
GTAAAAAATAAACAAGTGTAGAAAAGGCAGTGGCTCAATAGCACACTGGGATATACAC  
>HPV28\_Alpha\_1020202\_nt4781\_Genome\_Tile\_rc|1  
AACGAGGGTTTCAGTAAAGGCAGGGTTGGTAAAGTTGGAACCTACTAATGACCACATTGTCA  
>HPV28\_Alpha\_1020202\_nt4801\_Genome\_Tile\_rc|1  
CATTTTGGGGAACCTCTAACAACGAGGGTTTCAGTAAAGGCAGGGTTGGTAAAGTTGGAAC  
>HPV28\_Alpha\_1020202\_nt5341\_Genome\_Tile\_rc|1  
CATAAATAGAAATCCCAGCAGCGTTTTTCAGCAGGAGCAAGCAAAGGCTCCATTTCAATGT  
>HPV28\_Alpha\_1020202\_nt5421\_Genome\_Tile\_rc|1  
AGTGTATCCCCGAGATGACGTGGCGCTGCGACTTCTACCAGTAAAAGCTATGTCAGCGTC  
>HPV28\_Alpha\_1020202\_nt5441\_Genome\_Tile\_rc|1  
GAAGACAGTGGGGACACCGTAGTGTATCCCCGAGATGACGTGGCGCTGCGACTTCTACCA  
>HPV28\_Alpha\_1020202\_nt5461\_Genome\_Tile\_rc|1  
CATACTTGGTAGTTAGTGTGGAAGACAGTGGGGACACCGTAGTGTATCCCCGAGATGACG  
>HPV28\_Alpha\_1020202\_nt5881\_Genome\_Tile\_rc|1  
GGCGGACACTTTGGGCACATCTGCTTTGTTAGTGGATGATTTAGGAATGGGAAAATAAGG  
>HPV28\_Alpha\_1020202\_nt5901\_Genome\_Tile\_rc|1  
CGGAATACCTTATACTGAAAGGCGGACACTTTGGGCACATCTGCTTTGTTAGTGGATGAT  
>HPV28\_Alpha\_1020202\_nt6521\_Genome\_Tile\_rc|1  
TGCCCTGACCTTTAATATACAATGTTTCAGGAATGGTGTCCCAGCAACACCAGCTCTAT  
>HPV28\_Alpha\_1020202\_nt6541\_Genome\_Tile\_rc|1  
ACCAATCACATCCCTCCCGTTGCCCTGACCTTTAATATACAATGTTTCAGGAATGGTGTGTC  
>HPV28\_Alpha\_1020202\_nt7101\_Genome\_Tile\_rc|1  
CCTACACCCAACCTGCATTAAAAATTTCTTCCCAGAGGGAATTGCGATAGATCAAGAGAA

>HPV28\_Alpha\_1020202\_nt7241\_Genome\_Tile\_rc|1  
CATACACTGACACACAGGACAACAACAGGCAAACATACAAAACACAGTAGTGCTACTTTT  
>HPV28\_Alpha\_1020202\_nt7281\_Genome\_Tile\_rc|1  
ACATACACCATACTTTTGTACAAACACATATCAGGGACGCCCATACACTGACACACAGGAC  
>HPV28\_Alpha\_1020202\_nt7341\_Genome\_Tile\_rc|1  
GGACAACAACAGGCAAACATACAAAACACAGTTATAACCACATTACATGCATACACAAAT  
>HPV28\_Alpha\_1020202\_nt7381\_Genome\_Tile\_rc|1  
TGTACAAGCACATAGCAGGACGCCCACACACTGACACACAGGACAACAACAGGCAAACAT  
>HPV28\_Alpha\_1020202\_nt7401\_Genome\_Tile\_rc|1  
CAAATACATACACCATACTTTTGTACAAGCACATAGCAGGACGCCCACACACTGACACACA  
>HPV28\_Alpha\_1020202\_nt7661\_Genome\_Tile\_rc|1  
AATAAACTATAGAAAGATAGTATCACAGCCAAAACTTGCGAGACAGGGCAGGTTTGCAG  
>HPV28\_Alpha\_1020202\_nt7681\_Genome\_Tile\_rc|1  
AAGAATGATACAGCAAATGAAATAAACTATAGAAAGATAGTATCACAGCCAAAACTTGC  
>HPV28\_Alpha\_1020202\_nt7701\_Genome\_Tile\_rc|1  
AGACATTTTGACGTGCCAGAAAGAATGATACAGCAAATGAAATAAACTATAGAAAGATAG  
>HPV28\_Alpha\_1020202\_nt7900\_Genome\_Tile\_rc|1  
TAATTATAGTTGGAAAGAAACGTGTAGCAACTGCTTAATTTATGGCTAGAAAGCAAGCAG  
>HPV23\_Beta\_1020186\_nt0201\_Genome\_Tile\_rc|1  
GCGTCGAGTCCATCAATAATTTGGTGTAGCACATCCTACTTAAATAATGCACAGTCTGCA  
>HPV23\_Beta\_1020186\_nt0301\_Genome\_Tile\_rc|1  
TCTAAATAGGTAAGAAACCTAGAACAAAATCTGCAAGGTAGCAAGAGATCTACCACTGGT  
>HPV23\_Beta\_1020186\_nt0341\_Genome\_Tile\_rc|1  
CCAGATTAACTGCAAATGTTTATAATCAAATTTCTCGCAACTCTAAATAGGTAAGAAACCT  
>HPV23\_Beta\_1020186\_nt0461\_Genome\_Tile\_rc|1  
TTGCTCCTCCTGCTCAATTTTCACGACCATACACAGTTAGCTGATAAAATTTGTTGAATTTT  
>HPV23\_Beta\_1020186\_nt0801\_Genome\_Tile\_rc|1  
AGCACGTAAAGCTTTAACTGTGTCTCACAGCCTCCACAACTACGATGATCTTGTAAGGA  
>HPV23\_Beta\_1020186\_nt0841\_Genome\_Tile\_rc|1  
CAAAGATGCTTGGAACGAGCGAATTCCAAAATCTGTGGCTAGCACGTAAAGCTTTAACTG  
>HPV23\_Beta\_1020186\_nt0861\_Genome\_Tile\_rc|1  
ACCAGCTTCACGTTTTCTAGCAAAGATGCTTGGAACGAGCGAATTCCAAAATCTGTGGCT  
>HPV23\_Beta\_1020186\_nt0881\_Genome\_Tile\_rc|1  
CTTCTCGACAGGACAGGACACACCAGCTTCACGTTTTCTAGCAAAGATGCTTGGAACGAGC  
>HPV23\_Beta\_1020186\_nt0981\_Genome\_Tile\_rc|1  
CTAGGTCATATCATCAGAACAAGCAGCCTCTAATAAGCACCAAGTACTACAGCCTTCTT  
>HPV23\_Beta\_1020186\_nt1001\_Genome\_Tile\_rc|1  
TAATTTCTCCAACTATCATCTAGGTCATATCATCAGAACAAGCAGCCTCTAATAAGCA  
>HPV23\_Beta\_1020186\_nt1421\_Genome\_Tile\_rc|1  
TCCAAAACCTTCCTTAAATTTATGTAGCAACACTGCTTTAGCATTTTTACATCTTAACAA  
>HPV23\_Beta\_1020186\_nt1441\_Genome\_Tile\_rc|1  
GTAAGCTCATTAATACTAATTCCAAAACCTTCCTTAAATTTATGTAGCAACACTGCTTTA  
>HPV23\_Beta\_1020186\_nt1461\_Genome\_Tile\_rc|1  
TATTGCTTTTAACTGTCTGGTAAGCTCATTATACTAATTCCAAAACCTTCCTTAAATT  
>HPV23\_Beta\_1020186\_nt1481\_Genome\_Tile\_rc|1  
CCAATGTTTACAGCAGGTCTTATTGCTTTTAACTGTCTGGTAAGCTCATTATACTAAT  
>HPV23\_Beta\_1020186\_nt1561\_Genome\_Tile\_rc|1  
CAAATATAAGAACAGTGCTGTTGTAACAATTGCTTAGACGCATCTATGAGCTCTTCTTTT  
>HPV23\_Beta\_1020186\_nt1601\_Genome\_Tile\_rc|1  
GCAACATAAATAAAGTGACATAGGTGTGTATGCTGCAACCAATATAAGAACAGTGCTG  
>HPV23\_Beta\_1020186\_nt1661\_Genome\_Tile\_rc|1  
TATTTGCAGCATAGAAATCAATAATTTTACAACCTGTTTCTACTTTTTGCAACATTAAA  
>HPV23\_Beta\_1020186\_nt1681\_Genome\_Tile\_rc|1  
GATAATATATGATTTTCATGTATTTGCAGCATAGAAATCAATAATTTTACAACCTGTTTCT  
>HPV23\_Beta\_1020186\_nt1701\_Genome\_Tile\_rc|1

TTCTGTTTTTCGGAGGTTCTGATAATATATGATTTTCATGTATTTGCAGCATAGAAATCA  
>HPV23\_Beta\_1020186\_nt1921\_Genome\_Tile\_rc|1  
TCTGTGTCAGCCAATTTTGCATAGTTATAAGCAATACTACATTTCGTCAAGATGATCATTAA  
>HPV23\_Beta\_1020186\_nt2061\_Genome\_Tile\_rc|1  
TTCTAGATATGCAATGATGTACCCATGCAGAAATAGTCATTTCTCGCATTTACCTCTTT  
>HPV23\_Beta\_1020186\_nt2081\_Genome\_Tile\_rc|1  
CCATTGTCCATCACCTTCAATTCTAGATATGCAATGATGTACCCATGCAGAAATAGTCAT  
>HPV23\_Beta\_1020186\_nt2141\_Genome\_Tile\_rc|1  
TTTATCTAAAAATACAATGAAGTTTAATCCCTGATAGCGCAAAAATTTAACAATATCTTG  
>HPV23\_Beta\_1020186\_nt2161\_Genome\_Tile\_rc|1  
TTCTGTAAAAACGTTCTAAATTTATCTAAAAATACAATGAAGTTTAATCCCTGATAGCGC  
>HPV23\_Beta\_1020186\_nt2501\_Genome\_Tile\_rc|1  
CAAGTAAGGAACTTCTTTTCTTTCTTAAGGCTAATATTAGATGTAATAATTAATGGTGG  
>HPV23\_Beta\_1020186\_nt2521\_Genome\_Tile\_rc|1  
AATTCATATATTTCTACTATGCAAGTAAGGAACTTCTTTTCTTTCTTAAGGCTAATATTA  
>HPV23\_Beta\_1020186\_nt2801\_Genome\_Tile\_rc|1  
CGTTTTTCGAGCATAATAACAATAAAATTTGTCTTGTCTTAAGAGTTTCCAATGCTGTATT  
>HPV23\_Beta\_1020186\_nt3201\_Genome\_Tile\_rc|1  
TGTAGTACCAAAGCGCTTTGCATCTGCTTCAAATTTAATGTAATAGTTTTTAAGTTGGCC  
>HPV23\_Beta\_1020186\_nt3621\_Genome\_Tile\_rc|1  
TTCCTAGGTGCAACGCCACCCCTGTAAACAGACTCTGGTGATCTGGATCTTGATCTGGA  
>HPV23\_Beta\_1020186\_nt3861\_Genome\_Tile\_rc|1  
AAATGCTATTAACATCCTTGACGCCCTACTCTATCAGTAGAATGACCCCCAATCCATGA  
>HPV23\_Beta\_1020186\_nt3881\_Genome\_Tile\_rc|1  
TCCCTTTTCATGATTAGAATGAAATGCTATTAACATCCTTGACGCCCTACTCTATCAGTA  
>HPV23\_Beta\_1020186\_nt3901\_Genome\_Tile\_rc|1  
TCATTTCTTGAATACATTTTTTCCCTTTTCATGATTAGAATGAAATGCTATTAACATCCTTG  
>HPV23\_Beta\_1020186\_nt3921\_Genome\_Tile\_rc|1  
ATCTACTCCTAAAGGTAACCTTCATTTCTTGAATACATTTTTTCCCTTTTCATGATTAGAATG  
>HPV23\_Beta\_1020186\_nt3941\_Genome\_Tile\_rc|1  
TCAAATTTGTCCATAGGACCAATCTACTCCTAAAGGTAACCTTCATTTCTTGAATACATTTT  
>HPV23\_Beta\_1020186\_nt4021\_Genome\_Tile\_rc|1  
AGCAATATAGCAATATAAGTTAGTAAAAAATAGCAATAGGCAATGTTAGTGTGTAAAT  
>HPV23\_Beta\_1020186\_nt4081\_Genome\_Tile\_rc|1  
TTTGTATATATCAGTAACAGACGCTCGCTTAGTTCTTTGCGCCCGTACCATAATGTTAGT  
>HPV23\_Beta\_1020186\_nt4261\_Genome\_Tile\_rc|1  
TCGTACTCCAGGTCGCAATGGGACGTACCCCGTGGCACCACCGGTACCCCTACCTGTACC  
>HPV23\_Beta\_1020186\_nt4481\_Genome\_Tile\_rc|1  
TAGGTGTATCAATTCCTATGTCTACAGGTGTAGGATGTACCTCTGCAATAGTTTCTGCTT  
>HPV23\_Beta\_1020186\_nt4501\_Genome\_Tile\_rc|1  
GTCACGGCCTCCAGCTACAATAGGTGTATCAATTCCTATGTCTACAGGTGTAGGATGTAC  
>HPV23\_Beta\_1020186\_nt4541\_Genome\_Tile\_rc|1  
ACCTTGTTGGAGGATTAGTATCTACCACCTCTAAAATGGCGTCACGGCCTCCAGCTACAA  
>HPV23\_Beta\_1020186\_nt4561\_Genome\_Tile\_rc|1  
TTGTGTTCTTGTTACACTGAACCTTGTTGGAGGATTAGTATCTACCACCTCTAAAATGGC  
>HPV23\_Beta\_1020186\_nt4641\_Genome\_Tile\_rc|1  
ACAAATACATGATCAGCAAGGGATGCCTCACCTGTGATAGGTGTGGATTCTGAAATTATT  
>HPV23\_Beta\_1020186\_nt4681\_Genome\_Tile\_rc|1  
AGTTACCGCTCCTACGTGCTGACCTCCAGAACCTTCAAACACAAATACATGATCAGCAAG  
>HPV23\_Beta\_1020186\_nt4701\_Genome\_Tile\_rc|1  
GTATCTAATTCATCTCTTCAGTTACCGCTCCTACGTGCTGACCTCCAGAACCTTCAAAC  
>HPV23\_Beta\_1020186\_nt4741\_Genome\_Tile\_rc|1  
TGTAGCTTCCTCAATTTCAAAGGAATATCTGGAAGGATATGTATCTAATTCATCTCTTC  
>HPV23\_Beta\_1020186\_nt4801\_Genome\_Tile\_rc|1  
ACGTAGGTTCTGAATTCCTGACTTATTCTTTCAATGGGAGTACTAGTTCTGCGTGGTGG



>HPV23\_Beta\_1020186\_nt4821\_Genome\_Tile\_rc|1  
CGCCTGTTATACAGTGTCTACGTAGGTTTCCTGAATTCCTGACTTATTCTTTCAATGGGA  
>HPV23\_Beta\_1020186\_nt4881\_Genome\_Tile\_rc|1  
ACAAGTTTAGATGGAGTAGTTAAAAATAAAGGGTTTTTTACTTGAACCTGTTCTGTAAAG  
>HPV23\_Beta\_1020186\_nt5021\_Genome\_Tile\_rc|1  
TGGATTCTGTAAATAATGGTCTTCCTAATCTGTCTATATCTAAAAAGTCCCTATCTGGAG  
>HPV23\_Beta\_1020186\_nt5041\_Genome\_Tile\_rc|1  
TAATCTAATACGGCCTTCAGTGGATTCTGTAAATAATGGTCTTCCTAATCTGTCTATATC  
>HPV23\_Beta\_1020186\_nt5061\_Genome\_Tile\_rc|1  
GCCCTTTGACCTAACCTACTTAATCTAATACGGCCTTCAGTGGATTCTGTAAATAATGGT  
>HPV23\_Beta\_1020186\_nt5121\_Genome\_Tile\_rc|1  
AAATCTGTATAGAAGTGTACACGTGAACCAACACGTGTTCCACTGCGTGTTGAATGGAA  
>HPV23\_Beta\_1020186\_nt5141\_Genome\_Tile\_rc|1  
CTTCTGTATTAATAGTGCTTAAATCTGTATAGAAGTGTACACGTGAACCAACACGTGTTCT  
>HPV23\_Beta\_1020186\_nt5161\_Genome\_Tile\_rc|1  
TAATTCTAATCTATAGGTTCTTCTGTATTAATAGTGCTTAAATCTGTATAGAAGTGTAC  
>HPV23\_Beta\_1020186\_nt5201\_Genome\_Tile\_rc|1  
GTTCTCAATAACTGATGCATCTCCAGAATGCTCGCCTAATAATTCTAATCTATAGGTT  
>HPV23\_Beta\_1020186\_nt5221\_Genome\_Tile\_rc|1  
TATTACAGTGCTTTGCAGAGGTTCCCTCAATAACTGATGCATCTCCAGAATGCTCGCCTAA  
>HPV23\_Beta\_1020186\_nt5241\_Genome\_Tile\_rc|1  
ACATCATCTAAGTTCATATCTATTACAGTGCTTTGCAGAGGTTCCCTCAATAACTGATGCA  
>HPV23\_Beta\_1020186\_nt5281\_Genome\_Tile\_rc|1  
ATAATCATCTGCAGTATCTATAGTATCCTGAATAGCCTCAACATCATCTAAGTTCATATC  
>HPV23\_Beta\_1020186\_nt5301\_Genome\_Tile\_rc|1  
AATAAAAGATCTGCAGAGTTATAATCATCTGCAGTATCTATAGTATCCTGAATAGCCTCA  
>HPV23\_Beta\_1020186\_nt5321\_Genome\_Tile\_rc|1  
ATTCTTCAATTGCATTGTCCAATAAAAGATCTGCAGAGTTATAATCATCTGCAGTATCTA  
>HPV23\_Beta\_1020186\_nt5341\_Genome\_Tile\_rc|1  
CACTAATTGAGAATTATTAAATTCTTCAATTGCATTGTCCAATAAAAGATCTGCAGAGTT  
>HPV23\_Beta\_1020186\_nt5381\_Genome\_Tile\_rc|1  
GTATAGAATATGCAGACGAAGATCTATCAGAAAGTGCCAAACACTAATTGAGAATTATTAA  
>HPV23\_Beta\_1020186\_nt5461\_Genome\_Tile\_rc|1  
TGTGGGCCCAGGATAAATTACCTGATTACCTTCTATATCTTGAACATATACAATTGTTTC  
>HPV23\_Beta\_1020186\_nt5481\_Genome\_Tile\_rc|1  
AATATTATAGTTGGCCTTTCTGTGGGCCCAGGATAAATTACCTGATTACCTTCTATATCT  
>HPV23\_Beta\_1020186\_nt5521\_Genome\_Tile\_rc|1  
CAATGTGTGTATGACTACAGCAGGGGCACTAGGTAAGGGAAATATTATAGTTGGCCTTTC  
>HPV23\_Beta\_1020186\_nt5541\_Genome\_Tile\_rc|1  
TAATAATCAAAAGACTTGTCCAATGTGTGTATGACTACAGCAGGGGCACTAGGTAAGGGA  
>HPV23\_Beta\_1020186\_nt5561\_Genome\_Tile\_rc|1  
TTCTTAAGCTGGGATGTAAGTAATAATCAAAAGACTTGTCCAATGTGTGTATGACTACAG  
>HPV23\_Beta\_1020186\_nt5981\_Genome\_Tile\_rc|1  
GAGCTTATTAAATAGCGGGTGTCTGTACTGCCGACCCCTAAAGGTTGGCCGCGGCCGAT  
>HPV23\_Beta\_1020186\_nt6001\_Genome\_Tile\_rc|1  
CTAGAATTTTCTGCATCACGGAGCTTATTAAATAGCGGGTGTCTGTACTGCCGACCCCT  
>HPV23\_Beta\_1020186\_nt6021\_Genome\_Tile\_rc|1  
CAGTACCTTCTGACGTTCACTAGAATTTTCTGCATCACGGAGCTTATTAAATAGCGGGT  
>HPV23\_Beta\_1020186\_nt6041\_Genome\_Tile\_rc|1  
GATATTTCTTCTGTCATCTACAGTACCTTCTGACGTTCACTAGAATTTTCTGCATCACG  
>HPV23\_Beta\_1020186\_nt6181\_Genome\_Tile\_rc|1  
ACACTGTTTTTTAATTCTAAAGGAGGACACAACCCTAGTTGGCTACCTGCATCTTTACAG  
>HPV23\_Beta\_1020186\_nt6501\_Genome\_Tile\_rc|1  
CAGTAGGAAAAATAAGTGAGTTTTCTAAAGTGTTTTGTTGGTCTGCAGGTAAATAATATT  
>HPV23\_Beta\_1020186\_nt6681\_Genome\_Tile\_rc|1

ACTTTTCTAAACTGCTGTCATTGGTAACACTGATACTAAAGTTTGTATTACGTGTATTAT  
>HPV23\_Beta\_1020186\_nt6701\_Genome\_Tile\_rc|1  
TCTAATTTTAGTGGCATCATACTTTTCTAAACTGCTGTCATTGGTAACACTGATACTAAA  
>HPV23\_Beta\_1020186\_nt6721\_Genome\_Tile\_rc|1  
TCAACATGTCTTGTAAACTCTCTAATTTTAGTGGCATCATACTTTTCTAAACTGCTGTCA  
>HPV23\_Beta\_1020186\_nt6741\_Genome\_Tile\_rc|1  
TAAAAGAAAGTTGGTATTCTTCAACATGTCTTGTAAACTCTCTAATTTTAGTGGCATCAT  
>HPV23\_Beta\_1020186\_nt6761\_Genome\_Tile\_rc|1  
TATCCTGCACAACCTGTAGTATAAAAAGAAAGTTGGTATTCTTCAACATGTCTTGTAAACTC  
>HPV23\_Beta\_1020186\_nt6781\_Genome\_Tile\_rc|1  
AAGACCTCGGCCTTTAAAGGTATCCTGCACAACCTGTAGTATAAAAAGAAAGTTGGTATTCT  
>HPV23\_Beta\_1020186\_nt7041\_Genome\_Tile\_rc|1  
GCACTCCAATTTGAAACAGAACTTACGGCCTAAGGGATATTGATCTAGGTCTAGAGACA  
>HPV23\_Beta\_1020186\_nt7061\_Genome\_Tile\_rc|1  
GGTACCGGACCGTACACGCTGCACTCCAATTTGAAACAGAACTTACGGCCTAAGGGATA  
>HPV23\_Beta\_1020186\_nt7101\_Genome\_Tile\_rc|1  
TTTTGACAGTTTGGTCACTTTTCGAGTTGCAGGCCGTTTGGTACCGGACCGTACACGCT  
>HPV23\_Beta\_1020186\_nt7141\_Genome\_Tile\_rc|1  
TTATTGGCGACCGATATCGGTTACAATTGCACTTTTTTCCTTTTGACAGTTTGGTCACT  
>HPV22\_Beta\_1020178\_nt0161\_Genome\_Tile\_rc|1  
GAATACAGAATAGCAGCCCATCCTACTTAAATAATATGCAAGCAGTGCATAAATTACCAC  
>HPV22\_Beta\_1020178\_nt0181\_Genome\_Tile\_rc|1  
AGTGGTCTTTGCAAAGCCATGAATACAGAATAGCAGCCCATCCTACTTAAATAATATGCA  
>HPV22\_Beta\_1020178\_nt0301\_Genome\_Tile\_rc|1  
AAATTCTTATAATCAAATTGCCGCAATTCCAAATAGGTTAAAAACCTACTGCAGAATCTA  
>HPV22\_Beta\_1020178\_nt0361\_Genome\_Tile\_rc|1  
GCGTAGGCACAGCCGCTGCAACATGCAAAACACAAAGTCCTCGTCTGTCCAAATTAATTGC  
>HPV22\_Beta\_1020178\_nt0481\_Genome\_Tile\_rc|1  
GACTTCAAGCAATATTGACATCTCATATAAATTTGGCCTACAGGTGCTTGTCTTCTTGC  
>HPV22\_Beta\_1020178\_nt0781\_Genome\_Tile\_rc|1  
TATATACAGCTTCAGCTTTGTATCACAACCCCCACAATATACTACAATCTTGTAAAGGAGT  
>HPV22\_Beta\_1020178\_nt0801\_Genome\_Tile\_rc|1  
ATTCCAGAGAGAGTTGCTAGTATATACAGCTTCAGCTTTGTATCACAACCCCCACAATAT  
>HPV22\_Beta\_1020178\_nt0821\_Genome\_Tile\_rc|1  
GAGATGTTTGAAAGTCGCGAATTCCAGAGAGAGTTGCTAGTATATACAGCTTCAGCTTTG  
>HPV22\_Beta\_1020178\_nt1401\_Genome\_Tile\_rc|1  
ATGCGTCTTTAAATTTTCCCAGCAATACTGCCTTTACATTGTTGCATCTTAACAAACTGG  
>HPV22\_Beta\_1020178\_nt1421\_Genome\_Tile\_rc|1  
CTCATTATAGCTCACTCCAAATGCGTCTTTAAATTTTCCCAGCAATACTGCCTTTACATT  
>HPV22\_Beta\_1020178\_nt1441\_Genome\_Tile\_rc|1  
CTTCTAAATTGTCTAGTCAGCTCATTATAGCTCACTCCAAATGCGTCTTTAAATTTTCCC  
>HPV22\_Beta\_1020178\_nt1461\_Genome\_Tile\_rc|1  
GCTTACAGCAAGTCTTATTACTTCTAAATTTGTCTAGTCAGCTCATTATAGCTCACTCCAA  
>HPV22\_Beta\_1020178\_nt1661\_Genome\_Tile\_rc|1  
AATATGATTCTCATTAACCTTGTAACATGGAAGATAACAATCGCATCACAGTTTCTCTACT  
>HPV22\_Beta\_1020178\_nt1681\_Genome\_Tile\_rc|1  
ATTTTTGGAGGTTCTGATAAAATATGATTCTCATTAACCTTGTAACATGGAAGATAACAAT  
>HPV22\_Beta\_1020178\_nt1701\_Genome\_Tile\_rc|1  
AAGCAGCTATCATACTTCTGATTTTGGAGGTTCTGATAAAATATGATTCTCATTAACCTT  
>HPV22\_Beta\_1020178\_nt1901\_Genome\_Tile\_rc|1  
ATCAGCCAATCTAGCATACTGGTATGCAATAGTACATTCATCAACATAATCTTGATCATA  
>HPV22\_Beta\_1020178\_nt2061\_Genome\_Tile\_rc|1  
GACCATCGCCTTCTATCTTTGATATACAATGATGTATCCATGCAGAAATTGACATATCTC  
>HPV22\_Beta\_1020178\_nt2141\_Genome\_Tile\_rc|1  
TAGAAATGTTCTAAATTTATCTAAAAACACTATAAAATTTAACCCCTTGGTATCGCAAAAA

>HPV22\_Beta\_1020178\_nt2481\_Genome\_Tile\_rc|1  
AGGGAAATTTTTTTTCTTTTTTAACTAATGTTAGATGTTATAATAAGAGGTGGAAATT  
>HPV22\_Beta\_1020178\_nt2501\_Genome\_Tile\_rc|1  
ATATATTCTACTATGTAAATAGGGAAATTTTTTTTCTTTTTTAACTAATGTTAGATGT  
>HPV22\_Beta\_1020178\_nt2561\_Genome\_Tile\_rc|1  
AAGTTTAAACAGAGGTGTATCATTTGCGTCAAAGGGAAATTTGTTAGGAACTCAAATTC  
>HPV22\_Beta\_1020178\_nt3081\_Genome\_Tile\_rc|1  
TTCCCATGACTCATCATCAGTCTGATAATAAATGTATGACCACACTGTATAAGACATTAC  
>HPV22\_Beta\_1020178\_nt3161\_Genome\_Tile\_rc|1  
GTTTCAAATTTAATATAATAGGTTTTAAAGGTCCCTTCTATATAGTAAGCTCCTGTATAG  
>HPV22\_Beta\_1020178\_nt3181\_Genome\_Tile\_rc|1  
TACCATATCGTTTAGCATCTGTTTCAAATTTAATATAATAGGTTTTAAAGGTCCCTTCTA  
>HPV22\_Beta\_1020178\_nt3601\_Genome\_Tile\_rc|1  
CCCCGTCAACAGACTCTCGTGTACGGGATCGCGACCTTGAGCGGGACCTGGTGAGGGGGC  
>HPV22\_Beta\_1020178\_nt3881\_Genome\_Tile\_rc|1  
TCTCTTTCCCTATCTGTATGAAATGATATTAGTATCCTAGAGCGCCCGATTCTATCGGTT  
>HPV22\_Beta\_1020178\_nt3921\_Genome\_Tile\_rc|1  
TTCTACACCTAAAGGAAGTTTCATTTGTTGCAAGCACTTCTCTCTTTCCCTATCTGTATG  
>HPV22\_Beta\_1020178\_nt3941\_Genome\_Tile\_rc|1  
TCAAACCTGGCCATATGACCATTCTACACCTAAAGGAAGTTTCATTTGTTGCAAGCACTTC  
>HPV22\_Beta\_1020178\_nt4021\_Genome\_Tile\_rc|1  
CCATTTTGTTAGTAGCAAGCAAATAGGTTAGTATAAATAGGCAATGTTAGTGTGTAGTA  
>HPV22\_Beta\_1020178\_nt4241\_Genome\_Tile\_rc|1  
CCTTGACCTAAAGGAATATAGCCTGTAGGACCACCGGTACCCTTACCTGTACTTATACCA  
>HPV22\_Beta\_1020178\_nt4481\_Genome\_Tile\_rc|1  
ACTAAAGGTGTGTCAAGTTCCACATTGTCTATTGGGACCGGATGTACTTCTGCAATAGTT  
>HPV22\_Beta\_1020178\_nt4521\_Genome\_Tile\_rc|1  
AGCATCAGTCACCTCCAAAATGGCGTGACGGTCCCCAGAACTAAAGGTGTGTCAAGTTC  
>HPV22\_Beta\_1020178\_nt4541\_Genome\_Tile\_rc|1  
GTGCGCCTAAAAGGGGGATTAGCATCAGTCACCTCCAAAATGGCGTGACGGTCCCCAGAA  
>HPV22\_Beta\_1020178\_nt4721\_Genome\_Tile\_rc|1  
TCAAACTATATCTAGAAGGAAAAGTATCCAATTCAATGCTTTTCATTAGCATCCCCTACC  
>HPV22\_Beta\_1020178\_nt4801\_Genome\_Tile\_rc|1  
CTCTTCTTAAAGTTCTAAATTCCTGACTGATTCTTTCAATTGGTGTACTAACTCTACGAG  
>HPV22\_Beta\_1020178\_nt4821\_Genome\_Tile\_rc|1  
TAATCTTCTGTTGTATAAGGCTCTTCTTAAAGTTCTAAATTCCTGACTGATTCTTTCAAT  
>HPV22\_Beta\_1020178\_nt4861\_Genome\_Tile\_rc|1  
ATCGAATAAAACAAGGGGTCTCTTACTTGGACCTGTTCTGTTAATCTTCTGTTGTATAAGG  
>HPV22\_Beta\_1020178\_nt4881\_Genome\_Tile\_rc|1  
TCTCACAAGCCTGGACGGGGATCGAATAAAACAAGGGGTCTCTTACTTGGACCTGTTCTGT  
>HPV22\_Beta\_1020178\_nt5101\_Genome\_Tile\_rc|1  
GCACTCTAGCACCTACACGTGCGCCGCTGCGTGTGCTCAGCGATGCACGTTGCCCTAACC  
>HPV22\_Beta\_1020178\_nt5141\_Genome\_Tile\_rc|1  
GGCTCTTCTGCATTAATAGTGCTAATATCTGTAAAGAAATGCACTCTAGCACCTACACGT  
>HPV22\_Beta\_1020178\_nt5201\_Genome\_Tile\_rc|1  
AATGGTTCTTGTACTACAGAGCTGTCGCCAGAATGCTCACCTAATAATTCTAATTCAATG  
>HPV22\_Beta\_1020178\_nt5241\_Genome\_Tile\_rc|1  
AGGTATGTTGTCAATATTGACATCCAATATTGTGCTTTCAAATGGTTCTTGTACTACAGA  
>HPV22\_Beta\_1020178\_nt5281\_Genome\_Tile\_rc|1  
AGTCTACAGATGTTTCTGCTATGTTTGTATCCAACTTTTCAGGTATGTTGTCAATATTGA  
>HPV22\_Beta\_1020178\_nt5301\_Genome\_Tile\_rc|1  
TAACAAATCAGCAGAATCATAGTCTACAGATGTTTCTGCTATGTTTGTATCCAACTTTTC  
>HPV22\_Beta\_1020178\_nt5321\_Genome\_Tile\_rc|1  
TCCTCCACACCGTTGTCTAATAACAAATCAGCAGAATCATAGTCTACAGATGTTTCTGCT  
>HPV22\_Beta\_1020178\_nt5341\_Genome\_Tile\_rc|1

CCAATTGTGACCTACTAAAGTCCTCCACACCGTTGTCTAATAACAAATCAGCAGAATCAT  
>HPV22\_Beta\_1020178\_nt5361\_Genome\_Tile\_rc|1  
TCTATCTGAAGGACCTATTACCAATTGTGACCTACTAAAGTCCTCCACACCGTTGTCTAA  
>HPV22\_Beta\_1020178\_nt5381\_Genome\_Tile\_rc|1  
ACAGTAATAGATGGAAGTGATCTATCTGAAGGACCTATTACCAATTGTGACCTACTAAAG  
>HPV22\_Beta\_1020178\_nt5401\_Genome\_Tile\_rc|1  
TAGGGGATTCAAATTGTGGAACAGTAATAGATGGAAGTGATCTATCTGAAGGACCTATTA  
>HPV22\_Beta\_1020178\_nt5461\_Genome\_Tile\_rc|1  
CATATTTAGGATATACAACCTGTATTACCTCTATGTCTTGTATGTACACAATGGTTTCTC  
>HPV22\_Beta\_1020178\_nt5481\_Genome\_Tile\_rc|1  
TATAATAGTTGGCCTTTCTTCATATTTAGGATATACAACCTGTATTACCTCTATGTCTTG  
>HPV22\_Beta\_1020178\_nt5521\_Genome\_Tile\_rc|1  
TAGGTGATTGAATTATAGCAGGCCCCGAGGGTGTAGGTAATATAATAGTTGGCCTTTCTT  
>HPV22\_Beta\_1020178\_nt5561\_Genome\_Tile\_rc|1  
CGCAAGCTAGGATGTAAATAATAGTCAAAGGAGGAATGTGTAGGTGATTGAATTATAGCA  
>HPV22\_Beta\_1020178\_nt5881\_Genome\_Tile\_rc|1  
ATCATGGATTGTCATATCTCCCAAAGCAAATTTGTTAGGATCTGGAAATGTTACTCTAAA  
>HPV22\_Beta\_1020178\_nt5901\_Genome\_Tile\_rc|1  
ACTAATCTATACCTTTTCGGGATCATGGATTGTCATATCTCCCAAAGCAAATTTGTTAGGA  
>HPV22\_Beta\_1020178\_nt5921\_Genome\_Tile\_rc|1  
CTAACCTTTTACAAGCCATACTAATCTATACCTTTTCGGGATCATGGATTGTCATATCTC  
>HPV22\_Beta\_1020178\_nt6041\_Genome\_Tile\_rc|1  
CATTTCTTCTATCATCTGATGTTTCCTTCCTGGCGTTCAGTAGGGTTTTTCAGTATCATGTA  
>HPV22\_Beta\_1020178\_nt6441\_Genome\_Tile\_rc|1  
TGATCTTGTGTAAGTGCATCATCTGGTATAGCATCACCACAAGACCACCACGTACAAAA  
>HPV22\_Beta\_1020178\_nt6501\_Genome\_Tile\_rc|1  
GTTGGAAAGTAAGTGGAGTTTTCTAAAGCAGTCTGTGAAGCTGCAGGCAAGTAATATTTA  
>HPV22\_Beta\_1020178\_nt6701\_Genome\_Tile\_rc|1  
TGATTTTTTTTAGCATCATAATTAAGTGGTGCCGTCACCTGCCACACTAATAGAAAAAT  
>HPV22\_Beta\_1020178\_nt6721\_Genome\_Tile\_rc|1  
CACATGGCGCATAAATCTCTGATTTTTTTTAGCATCATAATTAAGTGGTGCCGTCACCT  
>HPV22\_Beta\_1020178\_nt6761\_Genome\_Tile\_rc|1  
TTCTACATAGCTGCAAAATAAAGGATAATTGGTATTCTTCCACATGGCGCATAAATCTC  
>HPV22\_Beta\_1020178\_nt6781\_Genome\_Tile\_rc|1  
TACCTCTGCTTCTAATGGTATTCTACATAGCTGCAAAATAAAGGATAATTGGTATTCTTC  
>HPV22\_Beta\_1020178\_nt7061\_Genome\_Tile\_rc|1  
CACTGGCCCTTGACGTTGTAACCCAGATTGAAATAAAAATTTACGACCCAGTGGATACT  
>HPV22\_Beta\_1020178\_nt7081\_Genome\_Tile\_rc|1  
ACGTTTCACACTGACCCTGGCACTGGCCCTTGACGTTGTAACCCAGATTGAAATAAAAA  
>HPV22\_Beta\_1020178\_nt7141\_Genome\_Tile\_rc|1  
AAACGGTTAAGAGGTAAGTTTCCTTCGTTTTACAGTTTTAGACGTTTTCCGCGTAGCAGA  
>HPV21\_Beta\_1020170\_nt0161\_Genome\_Tile\_rc|1  
GTCTGTTGAAGAGTCAGCCATGAGTACTAGGGCATCTTCCCTAGTATGTATATATGAATA  
>HPV21\_Beta\_1020170\_nt0221\_Genome\_Tile\_rc|1  
GCTAGATGTATTTCTTCTTCTAAATGTCTACGCTTAGGAGAAGGACCTTCGTCAGCACT  
>HPV21\_Beta\_1020170\_nt0301\_Genome\_Tile\_rc|1  
GGTACTAAACAATCATCCAATGGTATCTCTAACAGATTGGCTAGGTCACGAATTGTAGCT  
>HPV21\_Beta\_1020170\_nt2181\_Genome\_Tile\_rc|1  
TTAATGCTGCTAGAAACATTATAAAATTTACTTGCTGATATCTAAGGAACCTTTGCTATAG  
>HPV21\_Beta\_1020170\_nt2901\_Genome\_Tile\_rc|1  
TTTAGCTCTTGATTCTGAAACTGCTAATGGAGGTACATATTGATATCCAAGCCGTGTCAC  
>HPV21\_Beta\_1020170\_nt2921\_Genome\_Tile\_rc|1  
AGCATCATCCCTATAGCCTGTTTAGCTCTTGATTCTGAAACTGCTAATGGAGGTACATAT  
>HPV21\_Beta\_1020170\_nt3621\_Genome\_Tile\_rc|1  
TCCGGATCTGAATCGGTATTGCGGCTGGTCAGACGATTGAGACCGGGACCGGGAATAGGA

>HPV21\_Beta\_1020170\_nt4221\_Genome\_Tile\_rc|1  
TTAGTATGTTAAAGGCTGCTATAGGCTATCAAAGGAACCATACGACCGGTCAACACCTTT  
>HPV21\_Beta\_1020170\_nt4281\_Genome\_Tile\_rc|1  
TAAAAATAAAAAAAAAAATATATAATCAAAAAGTGTTAATATGTTAGTAGCAGAGCTATAG  
>HPV21\_Beta\_1020170\_nt5101\_Genome\_Tile\_rc|1  
CAAACGCCTATTTGTGAGCCCGCCACCCCTTCTCCTTATAATATTTTGAATTCTTTGAAT  
>HPV21\_Beta\_1020170\_nt5121\_Genome\_Tile\_rc|1  
TCTACATTAACCTGTTGAACCAAACGCCTATTTGTGAGCCCGCCACCCCTTCTCCTTATA  
>HPV21\_Beta\_1020170\_nt5141\_Genome\_Tile\_rc|1  
TGGATACAAACAAAGGATTCTCTACATTAACCTGTTGAACCAAACGCCTATTTGTGAGCC  
>HPV21\_Beta\_1020170\_nt5161\_Genome\_Tile\_rc|1  
CTGCACTAATCTAGAAGGCCTGGATACAAACAAAGGATTCTCTACATTAACCTGTTGAAC  
>HPV21\_Beta\_1020170\_nt5361\_Genome\_Tile\_rc|1  
GTTCTCTGAACGAGTACGAATAGTTCCTCGTTTACCAAGACGACTAACTCTCACGTAACCT  
>HPV21\_Beta\_1020170\_nt5381\_Genome\_Tile\_rc|1  
GGACCTGAGAACCAATTTGTGTTCCCTGAACGAGTACGAATAGTTCCTCGTTTACCAAGAC  
>HPV21\_Beta\_1020170\_nt5641\_Genome\_Tile\_rc|1  
TGGAACAGTATAAGAAGAAGTGGAGCGGCGCCTCCAACCCTAATTGGGAACCACTAAA  
>HPV21\_Beta\_1020170\_nt5761\_Genome\_Tile\_rc|1  
TGGCAAATCTGGTGTGGATAGATTATATCTGTACTAGTGTCTCGATCTTCAGGATAGGC  
>HPV21\_Beta\_1020170\_nt5781\_Genome\_Tile\_rc|1  
AATGTGTGTATGATTACAACCTGGCAAATCTGGTGTGGATAGATTATATCTGTACTAGTG  
>HPV21\_Beta\_1020170\_nt5821\_Genome\_Tile\_rc|1  
GCTAAGACTCGGATGTAAGTAAAAATCACCGCTTGTATCAAATGTGTGTATGATTACAAC  
>HPV21\_Beta\_1020170\_nt5841\_Genome\_Tile\_rc|1  
CTTCTTCTCTTAAATTTTCTGCTAAGACTCGGATGTAAGTAAAAATCACCGCTTGTATCA  
>HPV21\_Beta\_1020170\_nt6441\_Genome\_Tile\_rc|1  
TCAATCGGAGGGCACGATCCTGGAGGTGGATTGTCAGTTGCACATGGGATAGCTTTATCC  
>HPV21\_Beta\_1020170\_nt6461\_Genome\_Tile\_rc|1  
GTATTGCTGAATTAATTAATTCAATCGGAGGGCACGATCCTGGAGGTGGATTGTCAGTTG  
>HPV21\_Beta\_1020170\_nt6961\_Genome\_Tile\_rc|1  
ATTCTCAGGATTTACTGAAATACTAAAGTTTGTGTTACGAGTGTGTTGTTCTACTACTGTAAC  
>HPV21\_Beta\_1020170\_nt6981\_Genome\_Tile\_rc|1  
TCAATTTTAGACACGTCTGCATTCTCAGGATTTACTGAAATACTAAAGTTTGTGTTACGA  
>HPV21\_Beta\_1020170\_nt7001\_Genome\_Tile\_rc|1  
AGCTCTCGGCTTTATAATTTTCAATTTTAGACACGTCTGCATTCTCAGGATTTACTGAAA  
>HPV21\_Beta\_1020170\_nt7661\_Genome\_Tile\_rc|1  
TTGAGTCCTTAGCGTGTTAGAACAAACGAGATGTGATCCAACCTCTGGCGCGCGTAGTATCT  
>HPV20\_Beta\_1020162\_nt0161\_Genome\_Tile\_rc|1  
TGAAGAAGGAGGTGTAGCCATGTGCCTGCACTCTCTGCATTAGCTCTATGATATCTGTCT  
>HPV20\_Beta\_1020162\_nt0201\_Genome\_Tile\_rc|1  
CCTCTCCAATATTAGATGGTCTTCATCAGCGCTGTCTTCTGAAGAAGGAGGTGTAGCCA  
>HPV20\_Beta\_1020162\_nt0221\_Genome\_Tile\_rc|1  
CTCTAAGATTGGAGGTTTTGCCTCTCCAATATTAGATGGTCTTCATCAGCGCTGTCTTC  
>HPV20\_Beta\_1020162\_nt0241\_Genome\_Tile\_rc|1  
ATTGTTGCAGGCAATGGTGGCTCTAAGATTGGAGGTTTTGCCTCTCCAATATTAGATGGT  
>HPV20\_Beta\_1020162\_nt0261\_Genome\_Tile\_rc|1  
AAAGTTTTGCTAGGCCACAGATTGTTGCAGGCAATGGTGGCTCTAAGATTGGAGGTTTTG  
>HPV20\_Beta\_1020162\_nt2301\_Genome\_Tile\_rc|1  
AGGACAATACCCCTTCCCTTTAACACATGTATCAATGACATAGTGAATGCAGATTTTCCAG  
>HPV20\_Beta\_1020162\_nt4761\_Genome\_Tile\_rc|1  
GGTGCTACCTCTAGAACTGCACTAGAACCACTGGTAGTAGATGTAACGGTGTATCAGTT  
>HPV20\_Beta\_1020162\_nt4781\_Genome\_Tile\_rc|1  
GAGCTGGAGGTGTTGGTTCTGGTGCTACCTCTAGAACTGCACTAGAACCACTGGTAGTAG  
>HPV20\_Beta\_1020162\_nt4801\_Genome\_Tile\_rc|1

GGTGCGGCTGACTCTGACACGAGCTGGAGGTGTTGGTTCTGGTGCTACCTCTAGAACTGC  
>HPV20\_Beta\_1020162\_nt4821\_Genome\_Tile\_rc|1  
AATGATGGGTATGATACTGGGTGCGGCTGACTCTGACACGAGCTGGAGGTGTTGGTTCT  
>HPV20\_Beta\_1020162\_nt4881\_Genome\_Tile\_rc|1  
ACTATATGATCCGCTAATGAGCTTTCCCCCAATGTTGGTGTTGATTTCAGTTATTATTTGA  
>HPV20\_Beta\_1020162\_nt4921\_Genome\_Tile\_rc|1  
CATCCCCCAATTGCTTGGCCCCCAGAACCAGATGTCACCTACTATATGATCCGCTAATGA  
>HPV20\_Beta\_1020162\_nt4961\_Genome\_Tile\_rc|1  
ACCTTGATGGGAAATCCTGAAGCTCTATAAGTTCAGGTGTCATCCCCCAATTGCTTGGC  
>HPV20\_Beta\_1020162\_nt5061\_Genome\_Tile\_rc|1  
CTGTTAGTAAGGCCTCCTCTACGCCTGAACACATTTTGAAGTCTTTCATAGGTGTGCTA  
>HPV20\_Beta\_1020162\_nt5081\_Genome\_Tile\_rc|1  
GCACTTGTTGAACATACTTCTGTTAGTAAGGCCTCCTCTACGCCTGAACACATTTTGAA  
>HPV20\_Beta\_1020162\_nt5141\_Genome\_Tile\_rc|1  
TATCAAACCTGAAACCGGACCAATCTAGAAGGTTGTGTCAAAAATAATGGATTGTCTACAG  
>HPV20\_Beta\_1020162\_nt5241\_Genome\_Tile\_rc|1  
CCTAAACTCTGAACATCCAAAAAGTCTCTGTCTGGGGGCTCATTAAAAGTGTCTAAATCT  
>HPV20\_Beta\_1020162\_nt5341\_Genome\_Tile\_rc|1  
AGACCCTATTTGTGCTCCAGAACGAGTTCTGATAGTCCTTCGTTGACCTGCACGGCTGAC  
>HPV20\_Beta\_1020162\_nt5521\_Genome\_Tile\_rc|1  
TAAATCATCAGAATATGCACTGATTTCTGAAAGTGGGTTTTTCATCTACATTGATATCAAC  
>HPV20\_Beta\_1020162\_nt5621\_Genome\_Tile\_rc|1  
TAGTAGTTTTCAAAGTGAGGAACAGTGATGTAGATGTAGAACGCCTTCCCCCTACAACCTA  
>HPV20\_Beta\_1020162\_nt5641\_Genome\_Tile\_rc|1  
TACATAGTAAGAGCTAGATCTAGTAGTTTCAAAGTGAGGAACAGTGATGTAGATGTAGA  
>HPV20\_Beta\_1020162\_nt5661\_Genome\_Tile\_rc|1  
TAATACCCCTTTGTATCTTGTACATAGTAAGAGCTAGATCTAGTAGTTTCAAAGTGAGGA  
>HPV20\_Beta\_1020162\_nt5681\_Genome\_Tile\_rc|1  
TATCTTCAGGATATGCTACATAATACCCCTTTGTATCTTGTACATAGTAAGAGCTAGATC  
>HPV20\_Beta\_1020162\_nt5721\_Genome\_Tile\_rc|1  
AAATCTGGATTAGGATAAATAATGTCCTTACTAACATCTCTATCTTCAGGATATGCTACA  
>HPV20\_Beta\_1020162\_nt6041\_Genome\_Tile\_rc|1  
GATTTCCAGAAACCTTAGGGACTTTTATCTTAGTGCCTTGGATGTCATATATATTTAAAT  
>HPV20\_Beta\_1020162\_nt6261\_Genome\_Tile\_rc|1  
TCATCAGTTGAATTCCTTTTATATGAATTAGGGTTTTCTGTGTACCAAGTTTATTAAAT  
>HPV20\_Beta\_1020162\_nt6421\_Genome\_Tile\_rc|1  
TTGTATTGCTGTATTTTTTAATTCTATTGGAGGGCATGAACCTGGGTTTGGAACGTCGTC  
>HPV20\_Beta\_1020162\_nt6741\_Genome\_Tile\_rc|1  
TACATTGAATTACCTAGGTTGTTCTGTGCCTGATTATTCACAGGTGGAATGTAGAATGCA  
>HPV20\_Beta\_1020162\_nt6901\_Genome\_Tile\_rc|1  
TATGCTAAAAATTTGTATTTTCGAGTATTATCTACTACAGTAACAAATAGTTGATTGAACCA  
>HPV20\_Beta\_1020162\_nt6921\_Genome\_Tile\_rc|1  
GTGTTTTCTGAATGAACCTGATATGCTAAAAATTTGTATTTTCGAGTATTATCTACTACAGTA  
>HPV20\_Beta\_1020162\_nt6941\_Genome\_Tile\_rc|1  
TTTGAATTTTAGAAACATCAGTGTTTTCTGAATGAACCTGATATGCTAAAAATTTGTATTTTC  
>HPV20\_Beta\_1020162\_nt7261\_Genome\_Tile\_rc|1  
ATCCAATTCTAAGGATAATCTTTCTGATAGGTCAACATTCCAAAGTTTAGATCCTTGTA  
>HPV20\_Beta\_1020162\_nt7381\_Genome\_Tile\_rc|1  
TTGTTTGCCTTTTCGTTTGACGCCCCCTAGTAGATAACTTTGAAGATACAGTTTTTGTACC  
>HPV20\_Beta\_1020162\_nt7641\_Genome\_Tile\_rc|1  
GCGTTGGCAGCCTTACATTTCTCCTGTTCGGAACGTGTTGGGACGATGAAGTTTGAGCC  
>HPV20\_Beta\_1020162\_nt7681\_Genome\_Tile\_rc|1  
CGTTAACGGTCTTCTGCTGTGCCAAAAAGAAGAGCCAAAAGCGTTGGCAGCCTTACATTT  
>HPV42\_Alpha\_333211\_nt0181\_Genome\_Tile\_rc|1  
CCTCTGCGCCTGTAAAGTGCTTTTTTGCACCAAATGCAGGAAATCTGTAAATTCGCAATG

>HPV42\_Alpha\_333211\_nt0201\_Genome\_Tile\_rc|1  
TTTAAATGGTACGCGAGCACCTCTGCGCCTGTTAAGTGCTTTTGCACCAAATGCAGGA  
>HPV42\_Alpha\_333211\_nt0221\_Genome\_Tile\_rc|1  
CTCCACACCACTACCAAATCTTTAAATGGTACGCGAGCACCTCTGCGCCTGTTAAGTGC  
>HPV42\_Alpha\_333211\_nt0401\_Genome\_Tile\_rc|1  
TTTTCGCTCTGTGATAACGGCTTTTGACACAAGGCACATCTAATTTGTTGTTCTTCTAAA  
>HPV42\_Alpha\_333211\_nt0421\_Genome\_Tile\_rc|1  
CTGTATCAATATGATGGTTTTTTTCGCTCTGTGATAACGGCTTTTGACACAAGGCACATC  
>HPV42\_Alpha\_333211\_nt0441\_Genome\_Tile\_rc|1  
TATAAATTGAAATCTTGTACCTGTATCAATATGATGGTTTTTTTCGCTCTGTGATAACGG  
>HPV42\_Alpha\_333211\_nt0461\_Genome\_Tile\_rc|1  
CGACCCGTCCACTGACACAATATAAATTGAAATCTTGTACCTGTATCAATATGATGGTTT  
>HPV42\_Alpha\_333211\_nt0701\_Genome\_Tile\_rc|1  
GTTTCTTATGTCCGCCTCTGTACACTGCACAACGAGTTTAACAGACTTGTAACACTGTGT  
>HPV42\_Alpha\_333211\_nt0941\_Genome\_Tile\_rc|1  
TATGTATTACTGTACTATTATCTACAAAATCCACAAGATCTAACCCACTATCGTCTACAT  
>HPV42\_Alpha\_333211\_nt0981\_Genome\_Tile\_rc|1  
TGTTGTTTATTTAATAAGGCTTGTGCATGTACCTGCTTTGTATGTATTACTGTACTATTA  
>HPV42\_Alpha\_333211\_nt1661\_Genome\_Tile\_rc|1  
GATTTGTAGGTATGTTTAATAATTTACTAAGGCCTTTGGACACTGTAGTACGATTTTTTTC  
>HPV42\_Alpha\_333211\_nt1681\_Genome\_Tile\_rc|1  
AGGTGGCTCTATTAATAATTGATTTGTAGGTATGTTTAATAATTTACTAAGGCCTTTGGA  
>HPV42\_Alpha\_333211\_nt1721\_Genome\_Tile\_rc|1  
ATCTAAACCAGTATATGGCGGCAGCCACACTTTGTAACCGAGGTGGCTCTATTAATAATT  
>HPV42\_Alpha\_333211\_nt2761\_Genome\_Tile\_rc|1  
GCCTCCATACGTAAACATTTCCAATGTTCAATATGTTTTTGTAATCCCTACTATTTTCC  
>HPV42\_Alpha\_333211\_nt2841\_Genome\_Tile\_rc|1  
CTCTACATGTTTCCAATGTTGGTACTATTTGATGTCCTATATTTGCAAAGCCCATTTTAC  
>HPV42\_Alpha\_333211\_nt3321\_Genome\_Tile\_rc|1  
GGTTTGTGGTGACACTTGTGTGACCACTTAGTAGATCCAGTAGAGGGTATCTCTGCGT  
>HPV42\_Alpha\_333211\_nt3401\_Genome\_Tile\_rc|1  
GGTTTGGATGGGCACGTTGTATGCTGTTCCGTCTGTACAGTCTGCGTGGTGGTTGTCAAT  
>HPV42\_Alpha\_333211\_nt3441\_Genome\_Tile\_rc|1  
GCGACTGTCCACACTGTCTGTATCGTTTTTCGTGGCGGTGAGGTTTGGATGGGCACGTTGT  
>HPV42\_Alpha\_333211\_nt3481\_Genome\_Tile\_rc|1  
CTGGGGATGCTGGGGTTTGAGTGCTGCAGGTGCTGTGATGGCGACTGTCCACACTGTCTG  
>HPV42\_Alpha\_333211\_nt3501\_Genome\_Tile\_rc|1  
CCACGGATGCGCTGGGGATGCTGGGGATGCTGGGGTTTGAGTGCTGCAGGTGCTGTGATG  
>HPV42\_Alpha\_333211\_nt3521\_Genome\_Tile\_rc|1  
GACCCACACAATCCAGGGTCCACGGATGCGCTGGGGATGCTGGGGATGCTGGGGTTTGA  
>HPV42\_Alpha\_333211\_nt3561\_Genome\_Tile\_rc|1  
AGTGGTTCGCTCGCTTGTACAGTTTTTCACTGTTAGTTCTGACCCACACAATCCAGGGT  
>HPV42\_Alpha\_333211\_nt3641\_Genome\_Tile\_rc|1  
TCTTTTTAGCCTAAATCGTAGGCATTTTAGGCAATTAGGGTCACCTTGTAATGAATTAC  
>HPV42\_Alpha\_333211\_nt3681\_Genome\_Tile\_rc|1  
GCCATGTAGATGACACCTGTGTAAATAAATGTGAACAATTTCTTTTTAGCCTAAATCGTA  
>HPV42\_Alpha\_333211\_nt3701\_Genome\_Tile\_rc|1  
ACAATCATTTTCTGTAAATGCCATGTAGATGACACCTGTGTAAATAAATGTGAACAATT  
>HPV42\_Alpha\_333211\_nt3761\_Genome\_Tile\_rc|1  
ATTTCTTTGTGCTTCATCATAATAATGTATTGTTATTATACCAGTTTTAGTGTACAGTGT  
>HPV42\_Alpha\_333211\_nt3781\_Genome\_Tile\_rc|1  
TTTACAGTATTTAAAAATAAATTTCTTTGTGCTTCATCATAATAATGTATTGTTATTATA  
>HPV42\_Alpha\_333211\_nt3841\_Genome\_Tile\_rc|1  
AATCATATAAACTGTAACATAGACATATATCCAATACAGGATTTTATCCCAGAAGGTATT  
>HPV42\_Alpha\_333211\_nt3861\_Genome\_Tile\_rc|1

GTTTATACACATATACAACCTAATCATATAAACTGTAACATAGACATATATCCAATACAGG  
>HPV42\_Alpha\_333211\_nt3881\_Genome\_Tile\_rc|1  
AGTATTGAAGTCCTATAACTGTTTATACACATATACAACCTAATCATATAAACTGTAACAT  
>HPV42\_Alpha\_333211\_nt3901\_Genome\_Tile\_rc|1  
CCCACACGTTGTGGAGTCACAGTATTGAAGTCCTATAACTGTTTATACACATATACAACCT  
>HPV42\_Alpha\_333211\_nt4041\_Genome\_Tile\_rc|1  
GATAATAGCACCAATGTTAGGTAGCTAGCAAGGCAAGAGGCCCATACAGGATATGGATAA  
>HPV42\_Alpha\_333211\_nt4081\_Genome\_Tile\_rc|1  
TAGAAAAAATAGTCAAAGTATGTTAGTACCTGCAACCATGATAATAGCACCAATGTTAG  
>HPV42\_Alpha\_333211\_nt4101\_Genome\_Tile\_rc|1  
ATACCAAGAATGATTAAACATAGAAAAAATAGTCAAAGTATGTTAGTACCTGCAACCAT  
>HPV42\_Alpha\_333211\_nt4121\_Genome\_Tile\_rc|1  
ATGTTAGTAAGACAGAAGGAATACCAAGAATGATTAAACATAGAAAAAATAGTCAAAGT  
>HPV42\_Alpha\_333211\_nt4201\_Genome\_Tile\_rc|1  
CAACCATGTACAAATCACATGCACACCACACACACACCTAACTAATATGTGTTATTG  
>HPV42\_Alpha\_333211\_nt4241\_Genome\_Tile\_rc|1  
TGAAAATAGTAGCCAAACAATAATTGGTATTATATATGTACAACCATGTACAAATCACAT  
>HPV42\_Alpha\_333211\_nt4261\_Genome\_Tile\_rc|1  
AACAGCAGTGTGGCTATAAATGAAAATAGTAGCCAAACAATAATTGGTATTATATATGTA  
>HPV42\_Alpha\_333211\_nt4281\_Genome\_Tile\_rc|1  
TTTGTAAATACCAATATGCAAACAGCAGTGTGGCTATAAATGAAAATAGTAGCCAAACAA  
>HPV42\_Alpha\_333211\_nt4301\_Genome\_Tile\_rc|1  
GTATGGTAACAGTTTTATATGTTTGTAATACCAATATGCAAACAGCAGTGTGGCTATAAA  
>HPV42\_Alpha\_333211\_nt4341\_Genome\_Tile\_rc|1  
ACACAATATAACAAAAGTTTATTTACAGCACTGTATATACGTATGGTAACAGTTTATATG  
>HPV42\_Alpha\_333211\_nt4361\_Genome\_Tile\_rc|1  
TAATAGCACAAAAGAAGTACACACAATATAACAAAAGTTTATTTACAGCACTGTATATAC  
>HPV42\_Alpha\_333211\_nt4721\_Genome\_Tile\_rc|1  
CTGTTATTCCTGCATCAATAACTGATGACTCTTCTAATAAGGAAACAATAGAAGGATCAG  
>HPV42\_Alpha\_333211\_nt4741\_Genome\_Tile\_rc|1  
ATGAGAAGTAATATCAGGTACTGTTATTCCTGCATCAATAACTGATGACTCTTCTAATAA  
>HPV42\_Alpha\_333211\_nt4761\_Genome\_Tile\_rc|1  
GTAGTAATATTAAAACCTCCATGAGAAGTAATATCAGGTACTGTTATTCCTGCATCAATA  
>HPV42\_Alpha\_333211\_nt4801\_Genome\_Tile\_rc|1  
ATCTAATATAGCAGGCGTTGAGGCAGGCCACCAGTAGATGTAGTAATATTAAAACCTCC  
>HPV42\_Alpha\_333211\_nt4821\_Genome\_Tile\_rc|1  
GTATTAGTGGGAGGGGAGATATCTAATATAGCAGGCGTTGAGGCAGGCCACCAGTAGAT  
>HPV42\_Alpha\_333211\_nt4841\_Genome\_Tile\_rc|1  
TAGTTGTTGTGACACGTATAGTATTAGTGGGAGGGGAGATATCTAATATAGCAGGCGTTG  
>HPV42\_Alpha\_333211\_nt4861\_Genome\_Tile\_rc|1  
ATATAAAGGATTGGTAGATGTAGTTGTTGTGACACGTATAGTATTAGTGGGAGGGGAGAT  
>HPV42\_Alpha\_333211\_nt4921\_Genome\_Tile\_rc|1  
TATTAATAGGCGCCCATTAACCTCTGCTGGCAATGGCGGCTGCAATGTAAAAGGATCAAT  
>HPV42\_Alpha\_333211\_nt4941\_Genome\_Tile\_rc|1  
GGTGTGATGGTAGGAGTAGATATTAATAGGCGCCCATTAACCTCTGCTGGCAATGGCGGC  
>HPV42\_Alpha\_333211\_nt5021\_Genome\_Tile\_rc|1  
GAATGGGAGTACTAGTAAATGTGTTAGTTGTATCTGTAGATACAACAAACGTGTCCATTG  
>HPV42\_Alpha\_333211\_nt5041\_Genome\_Tile\_rc|1  
TGCAGACGACCGAGGGCCAGGAATGGGAGTACTAGTAAATGTGTTAGTTGTATCTGTAGA  
>HPV42\_Alpha\_333211\_nt5061\_Genome\_Tile\_rc|1  
CTAGAATATAACCCAGGCGTGACAGACCGAGGGCCAGGAATGGGAGTACTAGTAAAT  
>HPV42\_Alpha\_333211\_nt5141\_Genome\_Tile\_rc|1  
AGGCTGGATTGTCATAAGTAACCAACCGTGCAGGAGATGTTAAAAATGCACTGGTAGTAA  
>HPV42\_Alpha\_333211\_nt5181\_Genome\_Tile\_rc|1  
GGATGTTCAAATACTAATGTATCCTCCGTAAGTCCTTCATAGGCTGGATTGTCATAAGTA



>HPV42\_Alpha\_333211\_nt5301\_Genome\_Tile\_rc|1  
TGCATAGACAGCCTTTGTCCAATTCTACTAACACGTACACTACCCTGTTTGGATGATAAC  
>HPV42\_Alpha\_333211\_nt5321\_Genome\_Tile\_rc|1  
AACGGGTCCCGCGACGTGTCTGCATAGACAGCCTTTGTCCAATTCTACTAACACGTACAC  
>HPV42\_Alpha\_333211\_nt5381\_Genome\_Tile\_rc|1  
TAGTTTCTGAAGAGTGTGTAATAGGGCTAAGGTCATGAAAAAGTGTACACGTGACCCAA  
>HPV42\_Alpha\_333211\_nt5401\_Genome\_Tile\_rc|1  
AGATAAAGGCTGTAATTCAATAGTTTCTGAAGAGTGTGTAATAGGGCTAAGGTCATGAAA  
>HPV42\_Alpha\_333211\_nt5421\_Genome\_Tile\_rc|1  
GCTGCAGATACTGAAGAAGCAGATAAAGGCTGTAATTCATAGTTTCTGAAGAGTGTGTA  
>HPV42\_Alpha\_333211\_nt5461\_Genome\_Tile\_rc|1  
ATCAACATAAATATCAAATAACCCATCATTAATATTGGAGGCTGCAGATACTGAAGAAGC  
>HPV42\_Alpha\_333211\_nt5481\_Genome\_Tile\_rc|1  
GTAACATTTACATCACTAGTATCAACATAAATATCAAATAACCCATCATTAATATTGGAG  
>HPV42\_Alpha\_333211\_nt5501\_Genome\_Tile\_rc|1  
GTATAGAGGAAGTGGTATTTGTAACATTTACATCACTAGTATCAACATAAATATCAAATA  
>HPV42\_Alpha\_333211\_nt5521\_Genome\_Tile\_rc|1  
GGTAGCAAAACCATGCATAGGTATAGAGGAAGTGGTATTTGTAACATTTACATCACTAGT  
>HPV42\_Alpha\_333211\_nt5541\_Genome\_Tile\_rc|1  
GATGTAGTGGACAAACGGGGGGTAGCAAAACCATGCATAGGTATAGAGGAAGTGGTATTT  
>HPV42\_Alpha\_333211\_nt5561\_Genome\_Tile\_rc|1  
TGCTAGGTAAATGTAGGGAAAGATGTAGTGGACAAACGGGGGGTAGCAAAACCATGCATAG  
>HPV42\_Alpha\_333211\_nt5601\_Genome\_Tile\_rc|1  
AACGAAAAAGGTATGGTGGTATTGGCAGAATGTGTAGACATGCTAGGTAAATGTAGGGAAA  
>HPV42\_Alpha\_333211\_nt5641\_Genome\_Tile\_rc|1  
CACAACAGATAAATCAGGGCCCACATGCACAGTGGCAGGAAACGAAAAAGGTATGGTGGT  
>HPV42\_Alpha\_333211\_nt5681\_Genome\_Tile\_rc|1  
GAGGCATTACAGACGTTGGGGTACTGTCCCATGGGTGGTCCACAACAGATAAATCAGGGC  
>HPV42\_Alpha\_333211\_nt7301\_Genome\_Tile\_rc|1  
CATTACTACATACATCTATTTGTGTGTTTCTTACGTTTAGCTGAAGAAACAGATTTAGC  
>HPV42\_Alpha\_333211\_nt7321\_Genome\_Tile\_rc|1  
AACATAAATATGTATCATAACATTACTACATACATCTATTTGTGTGTTTCTTACGTTTA  
>HPV42\_Alpha\_333211\_nt7481\_Genome\_Tile\_rc|1  
AGTGAATAGGTTTGCAAATGTTAGGAAACATGGCCAATGCACCTGGTAACAGGCCAGAT  
>HPV42\_Alpha\_333211\_nt7501\_Genome\_Tile\_rc|1  
TTGCATTTATAAATTTAAAAAGTGAATAGGTTTGCAAATGTTAGGAAACATGGCCAATG  
>HPV42\_Alpha\_333211\_nt7521\_Genome\_Tile\_rc|1  
AAAACAGTTGGCAGCACATATTGCATTTATAAATTTAAAAAGTGAATAGGTTTGCAAAT  
>HPV42\_Alpha\_333211\_nt7541\_Genome\_Tile\_rc|1  
TGGCAGAACATACGTGCCATAAAACAGTTGGCAGCACATATTGCATTTATAAATTTAAAA  
>HPV42\_Alpha\_333211\_nt7581\_Genome\_Tile\_rc|1  
AAGGCGTGTGTGTTATGTAAAGGAATTAGGGAGTGTACGTTGGCAGAACATACGTGCCAT  
>HPV42\_Alpha\_333211\_nt7601\_Genome\_Tile\_rc|1  
TTTGTGCACATGCCTGTGCAAAGGCGTGTGTGTTATGTAAAGGAATTAGGGAGTGTACGT  
>HPV42\_Alpha\_333211\_nt7781\_Genome\_Tile\_rc|1  
TGTC AACAGTGACAAATAACTTTACTTGT TTAAGCCAAGGTAAC TTGTAAATGTGTATGC  
>HPV42\_Alpha\_333211\_nt7801\_Genome\_Tile\_rc|1  
AATTATATATATGAGTAATGTGTCAACAGTGACAAATAACTTTACTTGT TTAAGCCAAGG  
>HPV33\_Alpha\_333049\_nt0141\_Genome\_Tile\_rc|1  
ACGCACTGTAGTTCAATGTTGTGTATAGTTGTCTCCAATGCTTGGCACAAATCATGCAAT  
>HPV33\_Alpha\_333049\_nt0261\_Genome\_Tile\_rc|1  
GATAAGAACCGCAAACACAGTTTACATATTCCAAATGGATTTCCCTCTCTATATACAACCT  
>HPV33\_Alpha\_333049\_nt0281\_Genome\_Tile\_rc|1  
GTCTATATTCACTAATTTTAGATAAGAACCGCAAACACAGTTTACATATTCCAAATGGAT  
>HPV33\_Alpha\_333049\_nt0541\_Genome\_Tile\_rc|1

CCTTTAACGTTGGCTTGTGTCTCTCATGGCGTTTTTACACGTCACAGTGCAGTTTCTCT  
>HPV33\_Alpha\_333049\_nt1361\_Genome\_Tile\_rc|1  
TTTTACAGCTATCTACATTTGTCTCACAGCTTACTTCTGAATCATCCCCACCCCACTA  
>HPV33\_Alpha\_333049\_nt1401\_Genome\_Tile\_rc|1  
ACTACTATGTAGAACATTACTAATTTCTGCAACGTAACATTTTACAGCTATCTACATT  
>HPV33\_Alpha\_333049\_nt1421\_Genome\_Tile\_rc|1  
AATATATTTGCTTTTGTATTACTACTATGTAGAACATTACTAATTTCTGCAACGTAACA  
>HPV33\_Alpha\_333049\_nt1621\_Genome\_Tile\_rc|1  
TTATTATTCCTCTATCGCAAGTTAAACATTGTAAATGAGTATACAAACTATGCTGTTTAA  
>HPV33\_Alpha\_333049\_nt3161\_Genome\_Tile\_rc|1  
ACATACCTATATAATCTACTTTCCCTGTAACCATAGTACATGTATCTTCCCTCTATAATAT  
>HPV33\_Alpha\_333049\_nt3181\_Genome\_Tile\_rc|1  
TTCACAGTTATGTATATAATACATACCTATATAATCTACTTTCCCTGTAACCATAGTACA  
>HPV33\_Alpha\_333049\_nt3461\_Genome\_Tile\_rc|1  
CAGTACGTGCTGTTCTATTGTCCAAGGCGGGTCTGCACAGAACAGCTTTGTAAGGGGCT  
>HPV33\_Alpha\_333049\_nt3501\_Genome\_Tile\_rc|1  
GAACTACACACAGTCCGCTGCTTGTGTGTCAGTTAGTTGCAGTACGTGCTGTTCTATTG  
>HPV33\_Alpha\_333049\_nt3701\_Genome\_Tile\_rc|1  
CGGTACCTAAAAACATTTGTTGTTGCTGTTTCAGTTACAAATGTTACAGTTACAATTCCAT  
>HPV33\_Alpha\_333049\_nt3841\_Genome\_Tile\_rc|1  
GATAAGCATAAAAAACAATATAAAACATAATACAAAAACAATATCATGGTTATATACAAT  
>HPV33\_Alpha\_333049\_nt3861\_Genome\_Tile\_rc|1  
TTAAAGGACGTAATAATAAGGATAAGCATAAAAAACAATATAAAACATAATACAAAAACAA  
>HPV33\_Alpha\_333049\_nt3881\_Genome\_Tile\_rc|1  
ATAGGTAGAAATGGAAAGTATTAAAGGACGTAATAATAAGGATAAGCATAAAAAACAATAT  
>HPV33\_Alpha\_333049\_nt3961\_Genome\_Tile\_rc|1  
AACAAACAAATAGCAAAAAAAATTTTTAAAGGAGATCCCACAAACACCCAAAGCAGCAAT  
>HPV33\_Alpha\_333049\_nt4101\_Genome\_Tile\_rc|1  
AAAAAACTAAAATAACAACAACAATGTTAAACACCACCATGTGCACATATATACAAACA  
>HPV33\_Alpha\_333049\_nt4141\_Genome\_Tile\_rc|1  
CTGCTAAAAATATAAAGGTATTTATTAGTAATACAAAAAATAAACTAAAATAACAACA  
>HPV33\_Alpha\_333049\_nt4161\_Genome\_Tile\_rc|1  
TTGTGTCTCATAATAATACACTGCTAAAATATAAAGGTATTTATTAGTAATACAAAAAA  
>HPV33\_Alpha\_333049\_nt4401\_Genome\_Tile\_rc|1  
GGGATTGCAGCTGTAGGTGGGTCAGTACCAATAGGTACATAGCCAGTCCTTCCACCTGAA  
>HPV33\_Alpha\_333049\_nt4421\_Genome\_Tile\_rc|1  
GAGGACGTATAGGCTGCAAGGGGATTGCAGCTGTAGGTGGGTCAGTACCAATAGGTACAT  
>HPV33\_Alpha\_333049\_nt4441\_Genome\_Tile\_rc|1  
AACAGTGTCTACAGTAACCGGAGGACGTATAGGCTGCAAGGGGATTGCAGCTGTAGGTGG  
>HPV33\_Alpha\_333049\_nt5161\_Genome\_Tile\_rc|1  
GGTGTGGTCTAAAGGCACAATAGGACTTAAATCCTGATAATAATGTATTCTAGCTCCAAT  
>HPV33\_Alpha\_333049\_nt5181\_Genome\_Tile\_rc|1  
TCATATTGTTTCATTTGGCAGGTGTGGTCTAAAGGCACAATAGGACTTAAATCCTGATAA  
>HPV33\_Alpha\_333049\_nt5201\_Genome\_Tile\_rc|1  
TATCATGTAAAGGCTGTAATTCATATTGTTTCATTTGGCAGGTGTGGTCTAAAGGCACAA  
>HPV33\_Alpha\_333049\_nt5221\_Genome\_Tile\_rc|1  
ACTATAAGACGATGTAGAAGTATCATGTAAAGGCTGTAATTCATATTGTTTCATTTGGCAC  
>HPV33\_Alpha\_333049\_nt5321\_Genome\_Tile\_rc|1  
TGCTGGTACGTGTTGTTGCAACGTAAGTGTATGAGTGTGTCATTGGGGTGTGTACATTAT  
>HPV33\_Alpha\_333049\_nt5381\_Genome\_Tile\_rc|1  
GTATATCAGGGCCAGACATAACAGGAGTATCAAATCCTGTATTTAAAGGTATAGACACAT  
>HPV33\_Alpha\_333049\_nt5401\_Genome\_Tile\_rc|1  
TGTGGGAAATAAAGGGGAAGGTATATCAGGGCCAGACATAACAGGAGTATCAAATCCTGT  
>HPV33\_Alpha\_333049\_nt5461\_Genome\_Tile\_rc|1  
ACCGTCTACAACAATGGTGTCAAAAGGAAAAAAGGCGAAATAGGAACAAATGGGCTAGA

>HPV33\_Alpha\_333049\_nt5481\_Genome\_Tile\_rc|1  
GGATGTAAAACAAAGTCAGCACCGTCTACAACAATGGTGTCAAAAGGAAAAAAGGCGAA  
>HPV33\_Alpha\_333049\_nt5721\_Genome\_Tile\_rc|1  
CCAATAATTTTTTAGCGTTAGTAGGATTTTAAATAGAAAAATATGGATGGCCAACAGCAA  
>HPV33\_Alpha\_333049\_nt5741\_Genome\_Tile\_rc|1  
CAAGCCTGATACTTTGGGTACCAATAATTTTTTAGCGTTAGTAGGATTTTAAATAGAAAA  
>HPV33\_Alpha\_333049\_nt6401\_Genome\_Tile\_rc|1  
ACTGCTTTGAATAGAGGCAGTAGTTCTTGAACCTTTAATGTACAGGTCATCGGGAACAGC  
>HPV33\_Alpha\_333049\_nt7121\_Genome\_Tile\_rc|1  
TACACAAAAACAAACAACAACAACAACAACAAGTACATAGACAGAACAAAAAC  
>HPV33\_Alpha\_333049\_nt7141\_Genome\_Tile\_rc|1  
ATAACATACATTGTAACACATACACAAAAACAAACAACAACAACAACAACAACA  
>HPV33\_Alpha\_333049\_nt7281\_Genome\_Tile\_rc|1  
CCCATATACATAACATACATACAAATAGTTTAAACAATACACACAATGTTTTATTAACAT  
>HPV33\_Alpha\_333049\_nt7321\_Genome\_Tile\_rc|1  
GGTAGGGCAAGCAATACAACCTCCTTACTCATATAGGTACACCCATATACATAACATACAT  
>HPV33\_Alpha\_333049\_nt7341\_Genome\_Tile\_rc|1  
GTAGGTACATTGCAATGCAGGGTAGGGCAAGCAATACAACCTCCTTACTCATATAGGTACA  
>HPV33\_Alpha\_333049\_nt7361\_Genome\_Tile\_rc|1  
ACAAATATAGGGAAATAAAGGTAGGTACATTGCAATGCAGGGTAGGGCAAGCAATACAAC  
>HPV33\_Alpha\_333049\_nt7381\_Genome\_Tile\_rc|1  
ATACTAAACATGTAGGTACTACAAATATAGGGAAATAAAGGTAGGTACATTGCAATGCAG  
>HPV33\_Alpha\_333049\_nt7401\_Genome\_Tile\_rc|1  
GTATGTCAAAAAGGTAAAGCAATACTAAACATGTAGGTACTACAAATATAGGGAAATAAAG  
>HPV33\_Alpha\_333049\_nt7421\_Genome\_Tile\_rc|1  
ATTGTACAATATGGACACTAGTATGTCAAAAGGTAAAGCAATACTAAACATGTAGGTACT  
>HPV33\_Alpha\_333049\_nt7441\_Genome\_Tile\_rc|1  
AGGCATACAAAATGGAGGAAATTGTACAATATGGACACTAGTATGTCAAAAGGTAAAGCA  
>HPV33\_Alpha\_333049\_nt7521\_Genome\_Tile\_rc|1  
CAAACACAGTGCAGGAAAGAAAAGGATTAACCTGTTCTGCCAATGTCATAGGGTATGTATG  
>HPV33\_Alpha\_333049\_nt7561\_Genome\_Tile\_rc|1  
CAATGTCATAGGGTATGTATGCCAATGCAGCAAGTACAGACAAACACAGTGCAGGAAAGA  
>HPV33\_Alpha\_333049\_nt7601\_Genome\_Tile\_rc|1  
ACAAACACAGTGCAGGAAAGAAAAGGATTAACCTGTTCTGCCAATGTCATAGGGTATGTAT  
>HPV31\_Alpha\_333048\_nt0081\_Genome\_Tile\_rc|1  
TTTCCGAGGTCTTTCTGCAGGATTTTTGAACATGGCGTCTGTAGGTTTGCACAAAATACT  
>HPV31\_Alpha\_333048\_nt0101\_Genome\_Tile\_rc|1  
GCCGAGCTTAGTTCATGCAATTTCCGAGGTCTTTCTGCAGGATTTTTGAACATGGCGTCT  
>HPV31\_Alpha\_333048\_nt0121\_Genome\_Tile\_rc|1  
CATCGTAGGGTATTTCCAATGCCGAGCTTAGTTCATGCAATTTCCGAGGTCTTTCTGCAG  
>HPV31\_Alpha\_333048\_nt0141\_Genome\_Tile\_rc|1  
GACACAATTCAATCTTAGTTCATCGTAGGGTATTTCCAATGCCGAGCTTAGTTCATGCAA  
>HPV31\_Alpha\_333048\_nt0161\_Genome\_Tile\_rc|1  
GTTAACCTGACCTTTGCAGTAGACACAATTCAATCTTAGTTCATCGTAGGGTATTTCCAAT  
>HPV31\_Alpha\_333048\_nt0181\_Genome\_Tile\_rc|1  
AATCTAATACCTCTGTTTCTGTAACTGACCTTTGCAGTAGACACAATTCAATCTTAGTT  
>HPV31\_Alpha\_333048\_nt0441\_Genome\_Tile\_rc|1  
CCTTCCTCCTATGTTGTGGAATCGTTTCTTTTATCCAAATGTCTTTGTTTTCTTCTGG  
>HPV31\_Alpha\_333048\_nt0461\_Genome\_Tile\_rc|1  
GCTATGCAACGTCCTGTCCACCTTCTCCTATGTTGTGGAATCGTTTCTTTTATCCAAA  
>HPV31\_Alpha\_333048\_nt0481\_Genome\_Tile\_rc|1  
TACGAGGTCTTCTCCAACATGCTATGCAACGTCCTGTCCACCTTCTCCTATGTTGTGGA  
>HPV31\_Alpha\_333048\_nt0501\_Genome\_Tile\_rc|1  
TGTTTACACTTGGGTTTTCAGTACGAGGTCTTCTCCAACATGCTATGCAACGTCCTGTCCA  
>HPV31\_Alpha\_333048\_nt0701\_Genome\_Tile\_rc|1

CAAACGAAGTGTAGACTTACACTGACAACAAAAGGTAACGATATTGTAATTGGATGTGTC  
>HPV31\_Alpha\_333048\_nt0741\_Genome\_Tile\_rc|1  
CTTGCAATATGCGAATATCTACTTGTGTGCTCTGTACACACAAACGAAGTGTAGACTTAC  
>HPV31\_Alpha\_333048\_nt0981\_Genome\_Tile\_rc|1  
TGATTGTTGTATACATTACAATTGTCAATAAAGTCAACCATATCCTCCCCAGTATCACTA  
>HPV31\_Alpha\_333048\_nt1161\_Genome\_Tile\_rc|1  
GTTTTACTGTTATTTTCTATGCATATAGCTTTTAACCGTGGACTAATATTATAATCCACA  
>HPV31\_Alpha\_333048\_nt1281\_Genome\_Tile\_rc|1  
CCGTCACTACCATTACAACCTTAATGTTGTTGTTGCTCCTCTACCTGTACCATCTGCTGC  
>HPV31\_Alpha\_333048\_nt1301\_Genome\_Tile\_rc|1  
TCTCTCGTTCCTACTATGTGTCCCGTCACTACCATTACAACCTTAATGTTGTTTGTGCTCCT  
>HPV31\_Alpha\_333048\_nt1321\_Genome\_Tile\_rc|1  
ATTACGTGTTGGAGTTTCATTCTCTCGTTCCTACTATGTGTCCCGTCACTACCATTACAAC  
>HPV31\_Alpha\_333048\_nt1341\_Genome\_Tile\_rc|1  
GTTTTTAACTTGCATATATTACGTGTTGGAGTTTCATTCTCTCGTTCCTACTATGTGTC  
>HPV31\_Alpha\_333048\_nt1361\_Genome\_Tile\_rc|1  
TAGCAGCTTTACCATTGCTAGTTTTTAACTTGCAATATATTACGTGTTGGAGTTTCAT  
>HPV31\_Alpha\_333048\_nt1461\_Genome\_Tile\_rc|1  
GCAGCTACACACCAATCAGTACATGTGCTTTTATTGCTTTGAAATGGCCTAATTAGTTCC  
>HPV31\_Alpha\_333048\_nt1581\_Genome\_Tile\_rc|1  
CTCACAAGCATTAACATAACCATGCCCCAGGAACATGCTAAACTTTGTAAATGGCAATAC  
>HPV31\_Alpha\_333048\_nt1681\_Genome\_Tile\_rc|1  
ACGTAATTTGGGTGGCTGAATTAACATACAATTTGTAGATATACACAATAATTTTTCTAA  
>HPV31\_Alpha\_333048\_nt2381\_Genome\_Tile\_rc|1  
TAGATACAGGGTTGCCATCTAGTGCATTTTCGTAGGTAATTGTCTATATAATGCCAACATG  
>HPV31\_Alpha\_333048\_nt2461\_Genome\_Tile\_rc|1  
ATCCTTACCTGCATTTATATTAGATGTAATCAATAAAGGAGGACATTTTAACTGCATTAA  
>HPV31\_Alpha\_333048\_nt2761\_Genome\_Tile\_rc|1  
ATTAATACACATTCAAGTCGAATATGTTTCCAATAGTCTATATGATCACAAAGTCGTTTA  
>HPV31\_Alpha\_333048\_nt2901\_Genome\_Tile\_rc|1  
CATTTTTGTATTTCAGTGTTATTTAATGTTTCCAACATCATTTGTAGTTCAATAGCTTGTA  
>HPV31\_Alpha\_333048\_nt2921\_Genome\_Tile\_rc|1  
TTGCTGCATTGTCCAGTCCTCATTTTTGTATTTCAGTGTTATTTAATGTTTCCAACATCAT  
>HPV31\_Alpha\_333048\_nt2941\_Genome\_Tile\_rc|1  
AAATACAGTTCAAGACTTGTTTGTGCTGCATTGTCCAGTCCTCATTTTTGTATTTCAGTGTTA  
>HPV31\_Alpha\_333048\_nt3021\_Genome\_Tile\_rc|1  
GCATGGTGTTGTGTACATCACCATCAAATTCACCTCTACAGTATATCCATGTTTTTTTA  
>HPV31\_Alpha\_333048\_nt3101\_Genome\_Tile\_rc|1  
GCCCTTACAATTAACCTGCCCTTCCACAACAGTACATTGGCCATCTATACATAGGTATAT  
>HPV31\_Alpha\_333048\_nt3121\_Genome\_Tile\_rc|1  
CCTTCATGTACATAATAAATGCCCTTACAATTAACCTTGCCCTTCCACAACAGTACATTGG  
>HPV31\_Alpha\_333048\_nt3141\_Genome\_Tile\_rc|1  
TTACAAAATATGTTATATGTCCTTCATGTACATAATAAATGCCCTTACAATTAACCTGCC  
>HPV31\_Alpha\_333048\_nt3161\_Genome\_Tile\_rc|1  
TTTTGCCTCTTCTGTAAAATTTACAAAATATGTTATATGTCCTTCATGTACATAATAAAT  
>HPV31\_Alpha\_333048\_nt3181\_Genome\_Tile\_rc|1  
TTTTTACCAGTCCCATATTTTTTGCCTCTCTGTAAAATTTACAAAATATGTTATATGT  
>HPV31\_Alpha\_333048\_nt3301\_Genome\_Tile\_rc|1  
GATGTGGTGTTGTTGGCTGTTGGTAGCTTTGTAACAATCCCAGCAAAGGATATTTTCG  
>HPV31\_Alpha\_333048\_nt3481\_Genome\_Tile\_rc|1  
TGGTTTGTGCATGCAGCTGCACTGATAACCCACAGTTGACACTGTCCACGGAGTCGCCT  
>HPV31\_Alpha\_333048\_nt3501\_Genome\_Tile\_rc|1  
GACAACTGACAGCCCTTGTGTTGGTTTGTGCATGCAGCTGCACTGATAACCCACAGTTGA  
>HPV31\_Alpha\_333048\_nt3781\_Genome\_Tile\_rc|1  
CTGTAGAAAATATTTAGTTCAATCATTAGGCTAAATAGTCATATATCCTGTTGACACTGAT

>HPV31\_Alpha\_333048\_nt3881\_Genome\_Tile\_rc|1  
AGTGTTCATATACCGACACAGACAGCACAAGTGGACGTATGACAAGACACACAAATAGT  
>HPV31\_Alpha\_333048\_nt3901\_Genome\_Tile\_rc|1  
AAATCACAAATTAATAATAGTAGTGTTCATATACCGACACAGACAGCACAAGTGGACGTA  
>HPV31\_Alpha\_333048\_nt3921\_Genome\_Tile\_rc|1  
AGAGGTTGCAATAACCCATAAAATCACAATTAATAATAGTAGTGTTCATATACCGACAC  
>HPV31\_Alpha\_333048\_nt3941\_Genome\_Tile\_rc|1  
ATACAAAAACAACGTAATGGAGAGGTTGCAATAACCCATAAAATCACAATTAATAATAGT  
>HPV31\_Alpha\_333048\_nt4001\_Genome\_Tile\_rc|1  
CTTAAAAAAGATGCATGTGTATGAATTACAAATAATGGAATATATATAAACACAACATAT  
>HPV31\_Alpha\_333048\_nt4021\_Genome\_Tile\_rc|1  
AGTAAAAAAGTTACTGTTGACTTAAAAAAGATGCATGTGTATGAATTACAAATAATGGAA  
>HPV31\_Alpha\_333048\_nt4041\_Genome\_Tile\_rc|1  
TACAAACAACAGTATACACAAGTAAAAAAGTTACTGTTGACTTAAAAAAGATGCATGTGT  
>HPV31\_Alpha\_333048\_nt4101\_Genome\_Tile\_rc|1  
AAAAAAAAGTAAAAAAGTTTATTATACCAATACCAATACCAATACCAATACCAATACCAA  
>HPV31\_Alpha\_333048\_nt4141\_Genome\_Tile\_rc|1  
AGTGCGTTTTGTAGAGCGTTTGGACCGCATGGTAATAATAAAAAAAGTAAAAAAGTTT  
>HPV31\_Alpha\_333048\_nt4241\_Genome\_Tile\_rc|1  
GGTCTGCAATGGTAGTATGTTCTATTTTAGGTATAACGTCTGATGGACAAGTACCTGCTG  
>HPV31\_Alpha\_333048\_nt4261\_Genome\_Tile\_rc|1  
ACTACCATACCTTAATATTTGGTCTGCAATGGTAGTATGTTCTATTTTAGGTATAACGTC  
>HPV31\_Alpha\_333048\_nt4361\_Genome\_Tile\_rc|1  
CAGATACTGTAGAAGGACGTGTACTAAGAGGGACATATCCAGTGCGACCCCCAGTACCAG  
>HPV31\_Alpha\_333048\_nt4381\_Genome\_Tile\_rc|1  
TCTAATAGGTATACTTGCCTCAGATACTGTAGAAGGACGTGTACTAAGAGGGACATATCC  
>HPV31\_Alpha\_333048\_nt4401\_Genome\_Tile\_rc|1  
GGGTCAATGCTAACTGGTGGTCTAATAGGTATACTTGCCTCAGATACTGTAGAAGGACGT  
>HPV31\_Alpha\_333048\_nt4441\_Genome\_Tile\_rc|1  
TTCAACAAGACTTACTATAGAGGGGTCCAAGGGACCTACAGGGTCAATGCTAACTGGTGG  
>HPV31\_Alpha\_333048\_nt4481\_Genome\_Tile\_rc|1  
GTATAGGAGCAGGGGCACCAACATCAACAATTCCAGATTCTTCAACAAGACTTACTATAG  
>HPV31\_Alpha\_333048\_nt4501\_Genome\_Tile\_rc|1  
AGATGTTGTAGGAGGTGTGGTATAGGAGCAGGGGCACCAACATCAACAATTCCAGATTCC  
>HPV31\_Alpha\_333048\_nt4561\_Genome\_Tile\_rc|1  
AACACTTGTTACATCTAAAATTGCAGGTGTTGTGTCTGCAGTTGTAGCAATGTCAAACCC  
>HPV31\_Alpha\_333048\_nt4841\_Genome\_Tile\_rc|1  
GCTGTTTTTGGAGCACTAAGAAACGTTGGATCAATAACTTTTACTTGTGTGTAGCCTTAC  
>HPV31\_Alpha\_333048\_nt4861\_Genome\_Tile\_rc|1  
AGGGTTTTTCATATGTAATTAGCTGTTTTGGAGCACTAAGAAACGTTGGATCAATAACTTT  
>HPV31\_Alpha\_333048\_nt4881\_Genome\_Tile\_rc|1  
GCATTTACAGTTTCATAGGCAGGGTTTTTCATATGTAATTAGCTGTTTTGGAGCACTAAGA  
>HPV31\_Alpha\_333048\_nt4901\_Genome\_Tile\_rc|1  
AAAAGTATAAAGATTCTTCAGCATTTACAGTTTCATAGGCAGGGTTTTTCATATGTAATTA  
>HPV31\_Alpha\_333048\_nt4921\_Genome\_Tile\_rc|1  
TATATTATGCGATGTATTGGAAAAGTATAAAGATTCTTCAGCATTTACAGTTTCATAGGC  
>HPV31\_Alpha\_333048\_nt4941\_Genome\_Tile\_rc|1  
AGAAAGTCGGGATCAGGGGCTATATTATGCGATGTATTGGAAAAGTATAAAGATTCTTCA  
>HPV31\_Alpha\_333048\_nt5141\_Genome\_Tile\_rc|1  
TAGTTGCAGACGCCCTAAAGGTTGCATTTCATACTTTTCACCTGCAGGATTAATACTAC  
>HPV31\_Alpha\_333048\_nt5161\_Genome\_Tile\_rc|1  
ATCATTTAAAGTAGAAGTAGTAGTTGCAGACGCCCTAAAGGTTGCATTTCATACTTTTC  
>HPV31\_Alpha\_333048\_nt5201\_Genome\_Tile\_rc|1  
CCACAGTAAAAATCAGTGTCTGCATAAATGTCATATAAGCCATCATTTAAAGTAGAAGTAG  
>HPV31\_Alpha\_333048\_nt5221\_Genome\_Tile\_rc|1

ATTATGTGTGGCAGGTGTATCCACAGTAAAATCAGTGTCTGCATAAAATGTCATATAAGCC  
>HPV31\_Alpha\_333048\_nt5241\_Genome\_Tile\_rc|1  
ACAGCAGTAGAAGGGGAAACATTATGTGTGGCAGGTGTATCCACAGTAAAATCAGTGTCT  
>HPV31\_Alpha\_333048\_nt5361\_Genome\_Tile\_rc|1  
TGTGTAGGTGCATGCTCTATAGGTACATCAGGCCAGAAAATATGGGAATGTCAAAACCT  
>HPV31\_Alpha\_333048\_nt5401\_Genome\_Tile\_rc|1  
CACTTGTGGCGTTGTAGGGGCCAAAGGAAATGGGAAAACCTGTGTAGGTGCATGCTCTAT  
>HPV31\_Alpha\_333048\_nt5421\_Genome\_Tile\_rc|1  
CCCCCATCAACAAAAATAGACACTTGTGGCGTTGTAGGGGCCAAAGGAAATGGGAAAACC  
>HPV31\_Alpha\_333048\_nt5681\_Genome\_Tile\_rc|1  
TACAACTATTTTTTTTAGGATTGTCAGATTTAGGTATGGAATAATATGGATGGCCTACTGT  
>HPV31\_Alpha\_333048\_nt5941\_Genome\_Tile\_rc|1  
ATTGATATACATTCCCTATTATCAGTGCCAGGACCACCGGCATATCTATTAGAGTTTTCA  
>HPV31\_Alpha\_333048\_nt6041\_Genome\_Tile\_rc|1  
AGGGGTAATAGCATTGTTACTACAAGGACTACCTTTACCCCAATGCTCTCCAATAGGTGG  
>HPV31\_Alpha\_333048\_nt6061\_Genome\_Tile\_rc|1  
TCTAATGGAGGACAATCACCAGGGGTAATAGCATTGTTACTACAAGGACTACCTTTACCC  
>HPV31\_Alpha\_333048\_nt6381\_Genome\_Tile\_rc|1  
TAGGTGTAGGAAAGTATGTACTGTTAGCTAAAGTAGCTGTTGAACCGGAGCCTTTAATAT  
>HPV31\_Alpha\_333048\_nt6401\_Genome\_Tile\_rc|1  
TGAAGTAACCATGGAGCCGCTAGGTGTAGGAAAGTATGTACTGTTAGCTAAAGTAGCTGT  
>HPV31\_Alpha\_333048\_nt6941\_Genome\_Tile\_rc|1  
TGCTTTAAATTTAGGACGTGCCCTATATCCTGCCTGTAATAAAAAATTTGCGACCCAGTGG  
>HPV31\_Alpha\_333048\_nt7001\_Genome\_Tile\_rc|1  
TTTAGTTTTTTTTACGTTTTTGCTGGTGTAGTGGTAGATGCTGAGGGTGCCTACTGTTTACC  
>HPV31\_Alpha\_333048\_nt7041\_Genome\_Tile\_rc|1  
ACACATACAGACACATGTATTACATACACATCCATTACTTTTTTAGTTTTTTTTACGTTTTG  
>HPV31\_Alpha\_333048\_nt7061\_Genome\_Tile\_rc|1  
ACAATACAGCACAAGCACATACACATACAGACACATGTATTACATACACATCCATTACTT  
>HPV31\_Alpha\_333048\_nt7121\_Genome\_Tile\_rc|1  
AAGTACACACGCATACATAAACATACATATACCATATATAACACACAAACACACACATAT  
>HPV31\_Alpha\_333048\_nt7141\_Genome\_Tile\_rc|1  
AACATACTATACATATATACAAGTACACACGCATACATAAACATACATATACCATATATA  
>HPV31\_Alpha\_333048\_nt7161\_Genome\_Tile\_rc|1  
CATAGCATACATACACATAACATACTATACATATATACAAGTACACACGCATACATAA  
>HPV31\_Alpha\_333048\_nt7241\_Genome\_Tile\_rc|1  
AGTAATAGTATGTTACTAATAGGGTGTATATAAGGACAACATACACAACACACACAGGTA  
>HPV31\_Alpha\_333048\_nt7261\_Genome\_Tile\_rc|1  
GGAACAATAGTTTATAAAATAGTAATAGTATGTTACTAATAGGGTGTATATAAGGACAAC  
>HPV31\_Alpha\_333048\_nt7281\_Genome\_Tile\_rc|1  
GGAACAAGTAGGAACAAGTAGGAACAATAGTTTATAAAATAGTAATAGTATGTTACTAAT  
>HPV31\_Alpha\_333048\_nt7301\_Genome\_Tile\_rc|1  
CATGACTATTGGGAGGAGCAGGAACAAGTAGGAACAAGTAGGAACAATAGTTTATAAAAT  
>HPV31\_Alpha\_333048\_nt7321\_Genome\_Tile\_rc|1  
ATTATAGGCAGAAATAAGTACATGACTATTGGGAGGAGCAGGAACAAGTAGGAACAAGTA  
>HPV31\_Alpha\_333048\_nt7341\_Genome\_Tile\_rc|1  
TACTATGGCGTGACACCTAAATTATAGGCAGAAATAAGTACATGACTATTGGGAGGAGCA  
>HPV31\_Alpha\_333048\_nt7381\_Genome\_Tile\_rc|1  
GTAGCTTTAGTTGCAAAAAACGGACCGGGTGTACAACCTTTTACTATGGCGTGACACCTAA  
>HPV31\_Alpha\_333048\_nt7421\_Genome\_Tile\_rc|1  
CGGTTAGGGATTTAAATGGCTGCATAAAATCAAATGGAGTAGCTTTAGTTGCAAAAAA  
>HPV31\_Alpha\_333048\_nt7501\_Genome\_Tile\_rc|1  
TAGTATTCAGGAAACCAAAAACCGCAGAACTACTGCATCAGCATAGTTGTACTAGCATGT  
>HPV31\_Alpha\_333048\_nt7561\_Genome\_Tile\_rc|1  
GATTATATGTTGGCAAGGTGTGTTAGGCAGGAACTACAAGCCAGAATGTTGGCAAAAAAC

>HPV31\_Alpha\_333048\_nt7621\_Genome\_Tile\_rc|1  
GTTGAAC TACAGTTGTATTTAAACAAACATGATTCATAGTATAATTGCAAAGTTGGACTG  
>HPV31\_Alpha\_333048\_nt7641\_Genome\_Tile\_rc|1  
ATATATGTGCATGACACATAGTTGAACTACAGTTGTATTTAAACAAACATGATTCATAGT  
>HPV31\_Alpha\_333048\_nt7661\_Genome\_Tile\_rc|1  
AAGGTGTGTAGGATAATATAATATATGTGCATGACACATAGTTGAACTACAGTTGTATTT  
>HPV31\_Alpha\_333048\_nt7761\_Genome\_Tile\_rc|1  
ATAATGCATGACACAACCTTGGCAGTTTAAACATGTGCAAAGCCAGCACTGCAATCAAG  
>HPV31\_Alpha\_333048\_nt7781\_Genome\_Tile\_rc|1  
GAGTAACATACAACCTTATTTATAATGCATGACACAACCTTGGCAGTTTAAACATGTGCAA  
>HPV31\_Alpha\_333048\_nt7801\_Genome\_Tile\_rc|1  
CTATATGCAATTAATTATATGAGTAACATACAACCTTATTTATAATGCATGACACAACCTT  
>HPV31\_Alpha\_333048\_nt7821\_Genome\_Tile\_rc|1  
AACCGAAAACGGTGTAACTATATGCAATTAATTATATGAGTAACATACAACCTTATTT  
>HPV11\_Alpha\_333026\_nt0221\_Genome\_Tile\_rc|1  
GGAAAGTTGTCTCGCCACACAACCTTTAGGTTCTTATAGGCATATGCATATATCTCTGCG  
>HPV11\_Alpha\_333026\_nt0361\_Genome\_Tile\_rc|1  
ACAGGTAACAACGAATTAACACTTTTAAATATCTTCATTGGTTTCTTCTCTACTGTAG  
>HPV11\_Alpha\_333026\_nt0421\_Genome\_Tile\_rc|1  
TGAAGCGTGCCTTTCCCAATATGTGCTTTAGTTTTTCTATTTACACAACGGCTTGTGAC  
>HPV11\_Alpha\_333026\_nt0441\_Genome\_Tile\_rc|1  
CCACTGGTTATTTAGTTTTATGAAGCGTGCCTTTCCCAATATGTGCTTTAGTTTTTCTAT  
>HPV11\_Alpha\_333026\_nt1401\_Genome\_Tile\_rc|1  
CCATGTAATGTAGATCGTATATCCTTACATTTTAGTAATTCTAATATTCCTGATGTGTCT  
>HPV11\_Alpha\_333026\_nt2081\_Genome\_Tile\_rc|1  
CACTGTCAACTTTAGTACCCCTATACTTAATCCATTGTTAATAGACATCTTTTTTCATTT  
>HPV11\_Alpha\_333026\_nt2121\_Genome\_Tile\_rc|1  
TGATGTCTTAGAACTGCACAATTGGCTTCCAGTTACCTACACTGTCAACTTTAGTACCC  
>HPV11\_Alpha\_333026\_nt2501\_Genome\_Tile\_rc|1  
ATTTCTCCTCTTTGCTAATGTCTATATTTGATGTAACCAGTAGCGGTGGACACTTAATTA  
>HPV11\_Alpha\_333026\_nt2961\_Genome\_Tile\_rc|1  
CATAACTGGTGTCTGTAAATGTCCAAGGTTCCACACCATACTGAGTTTTTGCTAAGGATT  
>HPV11\_Alpha\_333026\_nt3121\_Genome\_Tile\_rc|1  
TCTACGGAAGTAGTTACTTTTACCCATGAGTCGTTGTCCTGCAGGTATATATGTGTCCAT  
>HPV11\_Alpha\_333026\_nt3141\_Genome\_Tile\_rc|1  
TATAATATATGCCCTTGGCATCTACGGAAGTAGTTACTTTTACCCATGAGTCGTTGTCTCT  
>HPV11\_Alpha\_333026\_nt3921\_Genome\_Tile\_rc|1  
ATTAATATTATAAGTACAATACTAAGAATACATACTGCAAATGCAATAACAACAGGCAAT  
>HPV11\_Alpha\_333026\_nt3941\_Genome\_Tile\_rc|1  
TATATACTACAAAATCAGATATTAATATTATAAGTACAATACTAAGAATACATACTGCAA  
>HPV11\_Alpha\_333026\_nt3961\_Genome\_Tile\_rc|1  
TGTTAGTACCAGCACAGATGTATATACTACAAAATCAGATATTAATATTATAAGTACAAT  
>HPV11\_Alpha\_333026\_nt4101\_Genome\_Tile\_rc|1  
GGTTAACATCACCATTATTGTTGCGTTTGCACAATGTATATGTGTATATAAAAGGCAGGA  
>HPV11\_Alpha\_333026\_nt4121\_Genome\_Tile\_rc|1  
TCACCATCATTTAAGTGACAGGTAAACATCACCATTATTGTTGCGTTTGCACAATGTATA  
>HPV11\_Alpha\_333026\_nt4221\_Genome\_Tile\_rc|1  
TTTAGTTTTTTCAGTACCATGTACAGCCCTGTAATGTAGTAACAACCAAGTACAGC  
>HPV11\_Alpha\_333026\_nt4241\_Genome\_Tile\_rc|1  
TTTGATTTTACACTTAGCACATTTAGTTTTTTCAGTACCATGTACAGCCCTGTAATGTAGT  
>HPV11\_Alpha\_333026\_nt4261\_Genome\_Tile\_rc|1  
AATCCACAGTAGTATTGCGGTTTGATTTACACTTAGCACATTTAGTTTTTTCAGTACCAT  
>HPV11\_Alpha\_333026\_nt4281\_Genome\_Tile\_rc|1  
ACCATGTGACATATACATAATCCACAGTAGTATTGCGGTTTGATTTACACTTAGCACACA  
>HPV11\_Alpha\_333026\_nt4301\_Genome\_Tile\_rc|1

TACACATAATCTCCATTATCACCATGTGACATATACACATAATCCACAGTAGTATTGCGG  
>HPV11\_Alpha\_333026\_nt4321\_Genome\_Tile\_rc|1  
AAGGTTTACTCTAGTTCATGTACACATAATCTCCATTATCACCATGTGACATATACACAT  
>HPV11\_Alpha\_333026\_nt4361\_Genome\_Tile\_rc|1  
TCATTATATATAACTAACGTACACCACACACTGTATAAAAAAGGTTTACTCTAGTTCATG  
>HPV11\_Alpha\_333026\_nt4601\_Genome\_Tile\_rc|1  
TAATAGCAGGCTTGGGAGAGCTTCCCAAGGTATATACCCTGCACGACCGCCACTACCAG  
>HPV11\_Alpha\_333026\_nt4641\_Genome\_Tile\_rc|1  
GGCTCCACAAGCACTGGCGGACGTGCTGCTGGCCCCCAGTAATAGCAGGCTTGGGAGAG  
>HPV11\_Alpha\_333026\_nt4761\_Genome\_Tile\_rc|1  
GATTTCAGATGATGTTATAGTAAAGCCACCCTGTGTAGGGGGTACCACCTCAGGTGCACCA  
>HPV11\_Alpha\_333026\_nt4781\_Genome\_Tile\_rc|1  
CTAAAATAGCAGGTGTAGTCGATTCAGATGATGTTATAGTAAAGCCACCCTGTGTAGGGG  
>HPV11\_Alpha\_333026\_nt4841\_Genome\_Tile\_rc|1  
GTTCTGTAAACAGGGGATTTTGAAACACACTAGTGGTAGTGTGATTGGTAACAGACACAT  
>HPV11\_Alpha\_333026\_nt5141\_Genome\_Tile\_rc|1  
ATTGTAAACTTACATCTTCTCCTTCATAGACAGGGTTGTCATAAGTTACCAATCGCTGTG  
>HPV11\_Alpha\_333026\_nt5161\_Genome\_Tile\_rc|1  
GTGGATAGACTCATGGGTAAATTGTAAACTTACATCTTCTCCTTCATAGACAGGGTTGTC  
>HPV11\_Alpha\_333026\_nt5181\_Genome\_Tile\_rc|1  
AATGCTTCATCAGGTGCATTGTGGATAGACTCATGGGTAAATTGTAAACTTACATCTTCT  
>HPV11\_Alpha\_333026\_nt5201\_Genome\_Tile\_rc|1  
GTAGTCTAATAATATCCATAAATGCTTCATCAGGTGCATTGTGGATAGACTCATGGGTAA  
>HPV11\_Alpha\_333026\_nt5441\_Genome\_Tile\_rc|1  
AATGTTGGACAGGGTCAGGGATAGGGTCAAATGGTTCAGCATAAATATCAAACGTGTCAT  
>HPV11\_Alpha\_333026\_nt5461\_Genome\_Tile\_rc|1  
AAGATAAGACTGTGTAACAGAATGTTGGACAGGGTCAGGGATAGGGTCAAATGGTTCAGC  
>HPV11\_Alpha\_333026\_nt5501\_Genome\_Tile\_rc|1  
TATTACCCACGATTGTGAAAGGGTATTAGGTGTGGAGGTAAGATAAGACTGTGTAACAG  
>HPV11\_Alpha\_333026\_nt7221\_Genome\_Tile\_rc|1  
TATATTACTTTTTGGTTTTGGTACGTTTTCGTTTTGGGGGCTGTAGAGGGCTTAGACACAG  
>HPV11\_Alpha\_333026\_nt7301\_Genome\_Tile\_rc|1  
AAACATATACACATATACACAATACAAGAAACATATACACACTACAACAACATATAAATA  
>HPV11\_Alpha\_333026\_nt7401\_Genome\_Tile\_rc|1  
TATTGCACAAAAACATACATACACATTCCACAAATATATACACACACTAAACACACAAAC  
>HPV11\_Alpha\_333026\_nt7441\_Genome\_Tile\_rc|1  
CTTAGTCACTGGGTGTAACAGGACACACATAATAATTGTTTATTGCACAAAAACATACAT  
>HPV11\_Alpha\_333026\_nt7521\_Genome\_Tile\_rc|1  
GGGGGTAAACATAGTATAGGTATATTACAAATATATATAATATAATATGAAGGCAACACAA  
>HPV11\_Alpha\_333026\_nt7641\_Genome\_Tile\_rc|1  
AAGATACTTGGCAGGGCAATATGTACCTTGGCACACAACATATGGGATTAGTACAAAACA  
>HPV11\_Alpha\_333026\_nt7681\_Genome\_Tile\_rc|1  
AGTCATGCAATACCGCGCCCTGGCCAGGTGTGTTGTTGGCAAGATACTTGGCAGGGCAAT  
>HPV11\_Alpha\_333026\_nt7701\_Genome\_Tile\_rc|1  
CGACAGGTTTATTGTACATTAGTCATGCAATACCGCGCCCTGGCCAGGTGTGTTGTTGGC  
>HPV11\_Alpha\_333026\_nt7741\_Genome\_Tile\_rc|1  
GCTTTTAACCTTTGGCTGCAATCCACAACATTGTACAAACCGACAGGTTTATTGTACATT  
>HPV11\_Alpha\_333026\_nt7761\_Genome\_Tile\_rc|1  
TTCAGCTAGAAGCCAAAAATGCTTTTAACCTTTGGCTGCAATCCACAACATTGTACAAAC
